# Supplementary material for: Comparative transcriptomic analysis reveals translationally relevant processes in mouse models of malaria
Source: eLife. 2022 Jan 10;11:e70763. doi: 10.7554/eLife.70763 (PMC8747512; doi:10.7554/eLife.70763)
Supplement: Figure 1—source data 1. [file elife-70763-fig1-data1.xlsx]

## Sheet: Key
Figure 1 - Source Data 1: Individual mouse parasitemia and weights
Description: Individual measurements of mouse parasitemia and weight (% of the baseline)
Sample Name	The name used for the individual mouse, see Supplementary File 20, to match this to its phenotype and ENA symbol
Parasitemia (%)
Weight (g)

## Sheet: Parasitemia %
	Parasitemia %
PbNK65_M 1	4.3
PbNK65_M 11	25.4
PbNK65_M 12	33.72
PbNK65_M 14	11.1
PbNK65_M 3	4.8
PbNK65_M 5	4.3
Pb ANKA_M1	3.4
Pb ANKA_M10	13
Pb ANKA_M2	5.1
Pb ANKA_M5	4.3
Pb ANKA_M6	11
Pb ANKA_M9	11.7
Pc AS_M1	2.4
Pc AS_M10	29.1
Pc AS_M4	2.6
Pc AS_M5	2.6
Pc AS_M8	18.1
Pc AS_M9	22.2
Py NL_M2	7.3
Py NL_M3	6
Py NL_M4	6.3
Py NL_M7	7
Py NL_M8	10.4
Py NL_M9	10
Py17XL M10	71
Py17XL M2	6.1
Py17XL M4	10.2
Py17XL M5	2
Py17XL M7	76
Py17XL M9	80

## Sheet: Weight (% of the baseline)
Weight (% of the baseline)
	Py17XL
Days post infection	Early			Late
	Py17XL M2	Py17XL M4	Py17XL M5	Py17XL M7	Py17XL M9	Py17XL M10
0	100	100	100	100	100	100
2	96.9072	95.0739	98.9529	96.6292	92.228	96.0894
3	99.4845	98.0296	101.571	101.124	94.8187	100
4				101.124	99.4819	101.676
5				96.0674	93.2643	96.0894
6
7
8
	PbANKA
	Early			Late
	Pb ANKA_M1	Pb ANKA_M2	Pb ANKA_M5	Pb ANKA_M6	Pb ANKA_M9	Pb ANKA_M10
0	100	100	100	100	100	100
2				105	100	99
3	98	108	101	106	102	99
4	96	105	98	103	102	101
5				103	104	100
6	99	104	104	107	108	100
7	95	99	99	103	104	98
8				100	99	93
9				90	91	87
	PbNK65
	Early			Late
	PbNK65_M1	PbNK65_M3	PbNK65_M5	PbNK65_M11	PbNK65_M12	PbNK65_M14
0	100	100	100	100	100	100
2	102	104	99	97.3958	98.5222	98.1043
4	107	105	103	103.125	103.448	102.37
6	92	99	93	92.7083	97.0443	98.1043
7				85.9375	95.0739	95.2607
8				79.1667	90.1478	89.0995
9				76.0417	92.1182	81.5166
10				80.7292	98.5222	89.0995
11				86.9792	102.956	97.1564
12				90.625	103.448	103.791
14				91.1458	105.419	100.474
15				93.75	106.897	101.896
17				96.875	99.5074	105.213
18				94.2708	94.0887	105.213
19				96.875	98.5222	90.5213
20				91.1458	100	95.7346
	PyNL
	Early			Late
	Py NL_M2	Py NL_M3	Py NL_M4	Py NL_M7	Py NL_M8	Py NL_M9
0	100	100	100	100	100	100
2	98	96	96	94	97	93
4	103	102	94	100	104	99
6	106	103	98	102	101	98
8	107	105	100	100	106	100
10	112	113	102	106	107	102
12				107	110	106
14				108	113	110
	PcAS
	Early			Late
	Pc AS_M1	Pc AS_M4	Pc AS_M5	Pc AS_M8	Pc AS_M9	Pc AS_M10
0	100	100	100	100	100	100
2				101	95	95
3	106	100	99	102	97	96
4	106	100	98	103	100	99
5				107	103	101
6	109	102	103	110	100	102
7	111	104	101	109	101	104
8	113	105	102	112	103	103
9	113	106	103	109	102	101
10				105	102	104
11				105	102	102
12				106	103	103
13				106	104	100
