# Supplementary material for: Comparative transcriptomic analysis reveals translationally relevant processes in mouse models of malaria
Source: eLife. 2022 Jan 10;11:e70763. doi: 10.7554/eLife.70763 (PMC8747512; doi:10.7554/eLife.70763)
Supplement: Figure 5—source data 1. [file elife-70763-fig5-data1.xlsx]

## Sheet: key
Figure 5 - Source Data 1: Individual mouse lactate measurements & erythrocyte counts
Description: Individual measurements of mouse erythrocyte counts and lactate
Sample Name	The name used for the individual mouse, see Supplementary File 20, to match this to its phenotype and ENA symbol
Erythrocyte Count x10^9/mL	Anemia
Lactate (mmol/L)	Lactate Measurement

## Sheet: Anemia
Erythrocyte Count x10^9/mL
Day	Py17XL
0	6.689	8.026	10.01				5.491	7.165	6.372
2	7.807	10.18	6.869	7.752	6.787	9.543	11.7	7.908	10.93
4	5.511	8.9	5.754		5.62	4.7	6.603	7.859	6.946
5	4.154	7.5	6.063	5.378	6.125
6	2.544	4.525	2.834	3.849	3.508

## Sheet: Lactate
Sample Name	Lactate (mmol/L)
Control 1 AG003	2
Control 2 AG003	2
Control 4 AG004	3.1
NK65_M 1	3.1
NK65_M 11	11
NK65_M 12	12.2
NK65_M 14	11
NK65_M 3	3
NK65_M 5	3.2
Pb ANKA_M1	3.1
Pb ANKA_M10	4.1
Pb ANKA_M2	3.2
Pb ANKA_M5	2.7
Pb ANKA_M6	2.8
Pb ANKA_M9	2.3
Pc AS_M1	2.8
Pc AS_M10	7.1
Pc AS_M4	3
Pc AS_M5	3.1
Pc AS_M8	4.2
Pc AS_M9	5.6
Py17XL M10	19.2
Py17XL M2	3.8
Py17XL M4	3.9
Py17XL M5	3.5
Py17XL M7	17.6
Py17XL M9	20
Py NL_M2	4.3
Py NL_M3	3.7
Py NL_M4	3.6
Py NL_M7	4.7
Py NL_M8	5.3
Py NL_M9	4.9
