# Supplementary material for: Comparative transcriptomic analysis reveals translationally relevant processes in mouse models of malaria
Source: eLife. 2022 Jan 10;11:e70763. doi: 10.7554/eLife.70763 (PMC8747512; doi:10.7554/eLife.70763)
Supplement: Supplementary file 2. [file elife-70763-supp2.xlsx]

## Sheet: Key
Supplementary File 2 Mouse Differential Expression Analysis without adjustment for immune cell type proportions
Table Column Name Key
Description: The results of the differential expression analysis (DEA) of each model for the following comparisons: Early-Control, Late-Control and Late-Early. LogFC values are given relative to the more severe phenotype i.e. late for late-early and early for early-control etc. This analysis did not adjust for the immune cell type proportions.
SYMBOL	MGI gene symbol
logFC	log fold-change: these are given relative to the more severe phenotype. So a positive logFc indocates that the expression of the gene is higher in the more severe group.
logCPM	log counts per million
LR	likelihood ratio
PValue	p-values
FDR	false discovery rate corrected p-values
Tab Name Key
PbNK65	Mouse model: Plasmodium berghei NK65
PbANKA	Mouse model: Plasmodium berghei ANKA
PcAS	Mouse model: Plasmodium chabaudi AS
Py17XL	Mouse model: Plasmoium yoelii 17XL
Py17XNL	Mouse model: Plasmodium yoelii 17XNL
Late	Mice culled at the models late time point
Control	Healthy uninfected mice
Early	Mice culled at the models early time point

## Sheet: PyNL_late-early
SYMBOL	logFC	logCPM	LR	PValue	FDR
Btbd19	-7.84967	2.56834	24.787	6.40293e-07	0.00690236
Rab37	-3.14002	4.14396	22.1418	2.53237e-06	0.0136495
Tmem42	-7.32316	1.93502	20.3519	6.44304e-06	0.023152
Papss2	-8.04073	3.01458	17.5869	2.74474e-05	0.0295883
Slx1b	-7.60984	1.79502	18.1782	2.01171e-05	0.0295883
Rab13	-7.54919	2.38324	18.5724	1.63571e-05	0.0295883
Clec5a	-2.82121	4.75724	17.8936	2.33604e-05	0.0295883
Mtf1	-7.53245	2.6715	18.5594	1.64695e-05	0.0295883
Tmem246	-7.90317	3.06246	17.5942	2.73415e-05	0.0295883
Clpp	-3.73468	3.03938	19.175	1.19268e-05	0.0295883
Mocs2	1.42293	4.95269	17.2302	3.31128e-05	0.0297463
Lipt1	7.74149	1.36681	17.3281	3.145e-05	0.0297463
Chek1	-8.12887	2.02364	17.0738	3.59547e-05	0.0298147
Kti12	-4.33263	3.03488	16.237	5.5891e-05	0.0430361
Gm4610	-7.04902	1.83545	15.818	6.97356e-05	0.0488225
Lyrm9	2.58	4.00919	15.7454	7.24638e-05	0.0488225
Slc36a3os	-8.09983	1.92431	15.6226	7.73268e-05	0.0490343
Rbbp9	3.70611	2.31389	15.2219	9.55866e-05	0.0524601
Acod1	-3.35325	6.37699	14.8713	0.000115103	0.0524601
Med31	-4.16682	2.14272	14.9959	0.000107742	0.0524601
Pard3b	-6.87887	2.418	14.8772	0.000114741	0.0524601
Pdcd7	-2.49777	3.56813	14.8196	0.000118298	0.0524601
Cd180	2.48964	3.14623	15.3472	8.9454e-05	0.0524601
Fastkd5	-5.29738	2.65793	14.8908	0.000113919	0.0524601
Rhbdd2	-6.87628	1.69458	14.7668	0.000121661	0.0524601
Immp2l	-6.81482	1.93891	14.6308	0.000130759	0.0542148
Cdc42ep5	-7.49051	2.47032	14.5415	0.000137106	0.054741
Rccd1	-6.77122	1.77453	14.3151	0.000154616	0.0574921
Gid8	1.97892	5.9106	14.3146	0.000154663	0.0574921
St14	-6.54656	1.32221	14.1395	0.000169741	0.0609937
Raly	1.89214	8.60478	13.8464	0.000198372	0.0639589
Ccdc86	-4.00985	3.0381	13.8902	0.000193811	0.0639589
A730011C13Rik	-7.1269	1.651	13.8149	0.000201726	0.0639589
Srp72	1.80479	6.72258	13.9048	0.000192303	0.0639589
Cnga1	7.28358	1.87262	13.5067	0.000237712	0.0732152
Pif1	-7.0669	2.05421	13.3813	0.000254146	0.0761025
Cryzl2	-3.01602	2.77124	13.2484	0.000272818	0.0773941
R3hdm2	-4.32833	1.32591	13.2763	0.000268776	0.0773941
Fam50a	2.63227	3.44817	13.1857	0.000282087	0.0779717
Mrgpra2a	-7.43307	1.65779	13.0558	0.000302344	0.0812665
Endod1	1.81707	5.24965	13.0145	0.000309084	0.0812665
Arid5a	-1.78986	5.0335	12.816	0.000343662	0.0841971
Lyar	-1.85998	3.95589	12.823	0.000342392	0.0841971
Gm5141	6.53297	2.1531	12.8465	0.000338108	0.0841971
Nr4a3	-5.25962	1.55967	12.7122	0.000363275	0.0843592
Pvr	-4.34939	2.927	12.6964	0.000366356	0.0843592
Gins3	-2.86282	3.12014	12.6891	0.0003678	0.0843592
Nom1	-1.50024	4.64004	12.5452	0.000397232	0.0856432
Gne	-1.5599	4.08997	12.5531	0.000395553	0.0856432
Usp30	-2.51788	3.21692	12.548	0.000396622	0.0856432
Arih2	1.68187	6.73188	12.4874	0.000409696	0.0865986
Qpctl	-3.94946	2.5073	12.3719	0.000435852	0.0903556
Cmc4	2.39502	4.33839	12.3292	0.000445933	0.0907011
Ikbkg	1.51856	6.51757	12.1921	0.000479916	0.095566
Dclre1b	2.16245	5.72126	12.1626	0.000487582	0.095566
Adgrl1	-7.30454	2.01178	12.1162	0.000499845	0.0962202
Flt1	-7.16335	1.4889	12.0481	0.000518454	0.0980515
Platr17	6.75957	1.54155	11.9245	0.000554015	0.10297
Trappc2l	1.44553	5.80697	11.8843	0.000566088	0.103431
Svbp	1.6607	5.34404	11.7768	0.000599745	0.107534
Pip4k2a	1.58376	7.81586	11.7498	0.000608495	0.107534
Eloa	1.94345	6.75653	11.6861	0.000629696	0.108576
Gm11110	-7.11923	1.19115	11.6718	0.000634537	0.108576
9530082P21Rik	6.91558	1.95488	11.2098	0.000813654	0.116501
Cryz	-6.81356	1.58981	11.1301	0.000849397	0.116501
BC055324	-7.00285	2.11011	11.1922	0.000821412	0.116501
Asprv1	-2.44301	5.82362	11.3894	0.000738654	0.116501
Armcx5	3.07556	3.13267	11.3442	0.00075685	0.116501
Itpkc	-3.04165	2.6292	11.2197	0.000809332	0.116501
Ppm1a	1.26703	6.86138	11.13	0.00084943	0.116501
Pimreg	-7.2273	2.06212	11.2428	0.000799346	0.116501
Kif2c	-3.79061	3.32561	11.3018	0.000774332	0.116501
Thra	-6.56805	1.00322	11.2679	0.000788599	0.116501
Ythdf2	-1.42958	5.32375	11.3327	0.000761544	0.116501
Gm45222	3.71563	2.50842	11.1206	0.000853764	0.116501
Srp14	1.24966	7.18982	11.3227	0.000765645	0.116501
Gm10509	-7.49349	1.54468	11.3267	0.000764002	0.116501
Gm43672	2.88655	3.81742	11.485	0.000701584	0.116501
Gm4759	-6.98275	1.49532	11.4573	0.000712139	0.116501
Sema4a	-1.85594	5.02497	11.083	0.000871248	0.117401
Zfp995	-6.57005	2.47271	11.0343	0.000894417	0.119035
Smad3	-2.0231	3.80569	10.9332	0.000944569	0.123871
Dscc1	-6.47843	1.84519	10.8495	0.000988208	0.123871
Suv39h2	-5.25008	1.25934	10.8967	0.00096335	0.123871
Oaz2	1.50196	6.85497	10.853	0.000986348	0.123871
As3mt	-1.67004	4.69364	10.8605	0.000982388	0.123871
Cnbd2	-6.58428	1.48286	10.7314	0.00105332	0.130515
Slc9a8	1.49443	4.94419	10.6662	0.00109113	0.133305
Trbv12.2	-4.19479	3.03369	10.6502	0.00110057	0.133305
Igf2bp3	-7.08691	1.64756	10.615	0.00112173	0.134358
Abhd5	1.68413	5.72433	10.5733	0.00114731	0.134435
Nek6	-6.4692	2.08543	10.5789	0.00114385	0.134435
Smim26	-4.19744	2.24474	10.4952	0.00119685	0.137255
Hccs	-1.76187	3.97511	10.5085	0.00118825	0.137255
Wdr83os	2.17344	3.56685	10.4083	0.00125451	0.140871
Tnfaip3	-1.83579	4.82026	10.4211	0.00124582	0.140871
Ms4a7	-7.13873	1.17242	10.3437	0.0012992	0.142912
Ccna2	1.6022	6.63806	10.3586	0.00128873	0.142912
Abhd15	3.74686	1.89451	10.3208	0.00131543	0.143235
Zfp799	-4.55826	2.30842	10.2605	0.00135906	0.146507
Hspa4l	1.71178	5.67353	10.2256	0.00138507	0.147832
Basp1	-3.90335	2.83759	10.2067	0.00139928	0.147884
Tspyl3	-4.55266	2.2225	10.1718	0.00142604	0.148046
Arfgap3	1.69114	4.68385	10.1338	0.00145574	0.148046
Trbv15	-2.55107	3.55067	10.1671	0.00142969	0.148046
Ccdc126	-3.4123	2.00968	10.138	0.00145243	0.148046
Dusp14	-6.7407	2.25417	10.0136	0.00155386	0.149128
Fam185a	-3.55667	2.5209	10.0577	0.00151715	0.149128
Ankrd50	-2.93142	3.39052	10.0476	0.00152545	0.149128
Gm32031	-6.44371	1.66906	10.0248	0.00154444	0.149128
Kcnj5	-6.68737	2.01485	10.0455	0.00152723	0.149128
Esr1	4.42905	1.84342	10.0216	0.00154713	0.149128
Ercc1	-2.16354	3.26446	9.99592	0.00156888	0.149128
Pim1	1.44348	7.70245	9.98635	0.00157705	0.149128
Phf19	-7.26944	1.51843	9.89029	0.00166153	0.149802
Oas1c	1.49896	4.54272	9.88086	0.00167007	0.149802
Cysltr1	-6.85781	2.2737	9.89676	0.0016557	0.149802
Tctex1d2	-3.37403	2.41021	9.9054	0.00164795	0.149802
Nfs1	1.25215	4.95405	9.86837	0.00168145	0.149802
Tnf	-3.15979	2.75113	9.88298	0.00166815	0.149802
Cnot8	-1.68811	4.14833	9.90699	0.00164652	0.149802
Mrto4	-2.47479	2.77336	9.80409	0.00174124	0.150358
Dynll1	1.67461	8.35502	9.79924	0.00174584	0.150358
Lca5	-6.40668	1.71965	9.79237	0.00175238	0.150358
Stard3	-1.46927	4.92252	9.79251	0.00175224	0.150358
Srfbp1	-1.80785	3.74805	9.78708	0.00175743	0.150358
Gar1	-3.70942	1.50163	9.75675	0.00178665	0.151655
Irf7	2.14581	9.14712	9.66839	0.00187466	0.156848
Gm43698	4.63053	1.78644	9.66549	0.00187761	0.156848
Gga2	-1.46689	5.53976	9.65197	0.00189149	0.156848
Retreg3	1.16352	7.07411	9.62075	0.00192391	0.156974
Tma7	1.24998	7.81367	9.60121	0.00194449	0.156974
Ndufs1	1.4114	6.68474	9.59484	0.00195125	0.156974
Fars2	1.56234	5.14453	9.59797	0.00194792	0.156974
Gadd45g	-3.21197	2.52424	9.56038	0.00198822	0.158763
Hdc	-2.11564	7.33442	9.51573	0.00203718	0.161477
Cdadc1	1.73633	3.76466	9.50074	0.0020539	0.161613
Nsmce3	-2.95205	2.82707	9.47368	0.00208441	0.162826
Eif3j1	1.26339	6.20236	9.43667	0.0021269	0.163872
Lppos	-4.35421	1.2528	9.42274	0.00214312	0.163872
Fkrp	-1.55965	3.72941	9.42248	0.00214341	0.163872
Zmat2	1.4937	6.65241	9.39606	0.00217452	0.16508
Cry1	-2.236	3.50816	9.37136	0.00220402	0.166149
Eepd1	-4.06466	2.40835	9.35323	0.00222593	0.166636
Armcx2	-3.22865	2.7284	9.31486	0.00227303	0.168988
Adamdec1	3.54335	2.37397	9.28847	0.00230601	0.170266
Gstk1	3.87167	2.83637	9.21296	0.00240307	0.171295
Sfxn5	-2.0081	4.36111	9.26428	0.00233666	0.171295
H3f3a.ps2	2.13254	3.21261	9.23118	0.00237928	0.171295
Rraga	1.25958	5.04398	9.23136	0.00237905	0.171295
Dpy19l3	2.40298	2.78076	9.22125	0.00239222	0.171295
Atg14	2.15614	3.11452	9.20368	0.00241529	0.171295
D17Wsu92e	1.53005	7.76127	9.14367	0.00249579	0.174706
Hipk2	2.63422	3.44319	9.15216	0.00248425	0.174706
Chmp4b	1.35843	8.71201	9.12003	0.00252825	0.174709
Fam32a	1.18741	8.07035	9.12707	0.00251855	0.174709
Akip1	2.39065	3.18216	9.10447	0.00254986	0.175079
Larp1b	1.51089	5.15909	8.98066	0.00272853	0.17674
Rnaseh2b	1.36774	5.27347	8.97432	0.002738	0.17674
Cox6c	1.97226	8.49084	9.00395	0.00269397	0.17674
Pkmyt1	-6.51754	0.805614	8.9854	0.00272145	0.17674
Ttc21b	-3.04124	2.44716	9.00938	0.00268597	0.17674
Ubl5	1.42252	8.38771	9.00215	0.00269663	0.17674
Acin1	1.36065	6.4873	9.0295	0.00265657	0.17674
Stx2	1.36769	5.39189	9.03285	0.00265171	0.17674
Ap3m1	1.24511	6.8375	9.02618	0.00266141	0.17674
Cdk10	-2.31845	2.62999	9.04779	0.00263012	0.17674
Klri1	4.06975	1.71553	8.94953	0.00277542	0.178089
Rrp12	-1.88702	3.3947	8.91675	0.00282567	0.179425
Ankrd33b	-2.55987	3.22764	8.91427	0.00282952	0.179425
Dynlt3	1.46521	6.29147	8.89159	0.00286488	0.179555
Zfp938	-3.98099	2.30773	8.90174	0.00284899	0.179555
Notch1	-2.98358	2.63965	8.59149	0.00337737	0.180508
Sumo1	0.971322	7.17346	8.71401	0.00315773	0.180508
Dkc1	1.03803	6.35497	8.61327	0.00333723	0.180508
Pamr1	-6.78836	1.56922	8.84806	0.00293401	0.180508
Cdk8	1.46978	4.86345	8.71445	0.00315697	0.180508
Fbxo38	1.056	6.4253	8.60452	0.0033533	0.180508
Zmym4	-1.91885	3.96894	8.76675	0.00306772	0.180508
Mpc1.ps	-3.67215	1.94766	8.60717	0.00334841	0.180508
Aup1	1.30479	5.56798	8.80214	0.00300878	0.180508
Msrb2	-2.65602	3.22207	8.66718	0.00323993	0.180508
Fahd1	3.15632	3.67331	8.5832	0.00339278	0.180508
Egr1	-6.74513	1.40117	8.70923	0.00316602	0.180508
Gm26616	-6.92558	1.12484	8.77614	0.00305197	0.180508
Arih1	1.08166	6.83466	8.71466	0.00315661	0.180508
Fbxo44	6.00941	1.10998	8.57977	0.00339918	0.180508
Il20rb	-6.36424	0.912242	8.6986	0.00318455	0.180508
Ccnb2	1.57497	5.99695	8.6216	0.00332199	0.180508
Tbc1d32	3.31446	2.01541	8.71769	0.00315138	0.180508
Tnfaip1	2.15863	3.46304	8.78585	0.00303576	0.180508
St8sia1	-6.16536	1.28415	8.72113	0.00314544	0.180508
Atp5b	1.6073	11.2319	8.62584	0.00331428	0.180508
Icam1	-1.41654	5.8334	8.61111	0.00334119	0.180508
Msl3l2	6.15064	0.979737	8.61085	0.00334166	0.180508
Dnajb13	6.21231	1.21675	8.62331	0.00331889	0.180508
Ifnar2	1.09624	5.80683	8.73094	0.00312856	0.180508
Fiz1	-1.53146	4.19261	8.6758	0.00322463	0.180508
Kif22	-2.91946	4.0372	8.74095	0.00311143	0.180508
Zcchc6	1.50622	8.23723	8.76014	0.00307886	0.180508
Tnfaip2	-1.40584	7.02729	8.83431	0.00295619	0.180508
Cd320	-3.41325	2.33985	8.7638	0.00307268	0.180508
Lsm6	1.18587	5.49467	8.69702	0.0031873	0.180508
BC024978	-5.7883	1.02838	8.5593	0.00343761	0.181654
Ighv1.75	3.18184	1.41447	8.50744	0.00353698	0.183904
2010107E04Rik	1.6067	7.76054	8.44976	0.00365091	0.183904
Igkv14.126	7.02756	1.43303	8.46057	0.00362928	0.183904
Cep128	1.51365	4.90332	8.4786	0.00359349	0.183904
Oas3	1.72666	7.1238	8.46314	0.00362417	0.183904
Marcksl1	-1.9094	4.99352	8.50684	0.00353813	0.183904
Nmt2	-1.56167	4.32758	8.48991	0.00357122	0.183904
Plcl2	1.17156	7.30121	8.4449	0.00366068	0.183904
Mrpl54	-1.5946	4.30002	8.44135	0.00366784	0.183904
Tial1	1.85376	3.83351	8.48059	0.00358955	0.183904
Ublcp1	1.12437	6.15453	8.48801	0.00357494	0.183904
Cbfa2t2	2.08715	3.44398	8.42269	0.00370568	0.184793
Tm2d2	-1.17656	5.11468	8.39267	0.00376737	0.184793
Psenen	1.13478	6.20638	8.39736	0.00375767	0.184793
Usp45	1.81569	4.87856	8.40516	0.00374157	0.184793
Fads2	-3.50759	2.82803	8.39078	0.00377129	0.184793
Ascc1	-6.0057	1.90185	8.38249	0.00378854	0.184798
Nfia	-6.56531	1.0407	8.37044	0.00381374	0.18519
Rnf214	-4.34886	1.64564	8.3579	0.00384014	0.185312
Tmem154	-1.16001	5.48366	8.35294	0.00385064	0.185312
Kcnip3	-6.02963	1.18842	8.34166	0.00387461	0.185637
Trp53bp1	1.47323	4.44067	8.29296	0.0039799	0.186076
Atxn3	1.49553	4.93497	8.28286	0.0040021	0.186076
Slc41a3	2.63921	2.07972	8.30007	0.00396435	0.186076
Ift88	-3.20561	1.90599	8.28412	0.00399933	0.186076
Triqk	-6.02705	1.98837	8.26614	0.00403913	0.186076
Ahsa1	1.28573	7.96674	8.26786	0.00403531	0.186076
Rnasel	1.58837	7.76567	8.31406	0.00393395	0.186076
Sac3d1	-3.33333	1.84061	8.28133	0.00400547	0.186076
Traip	1.59686	4.09557	8.30849	0.00394602	0.186076
Slc52a3	-6.40056	0.824452	8.25138	0.0040721	0.186797
Katna1	1.12437	6.84294	8.23715	0.00410414	0.187469
Cox7b	1.74138	8.95335	8.22522	0.00413122	0.187909
Dhx34	-2.85264	2.30599	8.19381	0.00420336	0.190354
Lcn4	-6.02487	2.13649	8.17687	0.00424278	0.190354
Gm7582	-6.51421	1.11889	8.16028	0.00428177	0.190354
Nat8f1	-5.93918	2.10625	8.15766	0.00428796	0.190354
Cnbp	0.973002	8.55879	8.16952	0.00426003	0.190354
Noxred1	-3.90074	1.92018	8.15642	0.00429091	0.190354
Cops2	1.66989	7.40049	8.14698	0.0043133	0.190563
Slc24a5	6.0645	1.27372	8.13013	0.00435357	0.191107
Zc2hc1a	-6.01918	1.21795	8.09996	0.00442664	0.191107
Rab5c	1.10733	7.79928	8.12021	0.00437746	0.191107
Gata3	-6.2147	1.54449	8.09776	0.00443199	0.191107
0.59	3.59578	11.691	8.1156	0.0043886	0.191107
Zfp948	-5.98236	1.77193	8.10506	0.00441418	0.191107
Ndufb11	1.54412	6.99405	8.06598	0.00451041	0.193714
Ctsb	1.79753	8.58486	8.01116	0.00464899	0.195926
Alkbh5	1.18018	5.98702	8.01878	0.00462948	0.195926
Mrps21	1.27044	6.31585	8.02846	0.0046048	0.195926
Uqcrc2	1.19681	8.21669	7.98858	0.00470732	0.195926
Gm27007	-6.42069	2.01372	7.98958	0.00470474	0.195926
Dnajc2	-1.04117	5.79524	8.00197	0.00467265	0.195926
Mfn2	-4.00078	2.08839	8.03658	0.00458421	0.195926
Ffar1	-2.41158	2.58455	7.99158	0.00469955	0.195926
Megf9	1.88986	3.70411	7.96891	0.00475876	0.197306
4833420G17Rik	1.07742	6.63209	7.95162	0.00480444	0.197679
Ubash3a	-1.98445	4.06774	7.95512	0.00479514	0.197679
Gpatch4	-2.55016	2.80145	7.94453	0.00482329	0.1977
Rnf115	1.59093	8.26313	7.9179	0.00489481	0.199871
Swi5	0.975941	6.78781	7.90287	0.00493565	0.200778
Prkab1	1.13061	4.88168	7.86885	0.00502935	0.200916
Fam76a	1.84173	3.67124	7.86782	0.00503223	0.200916
Uck2	-1.86622	4.53578	7.87209	0.00502036	0.200916
Cux1	1.36543	5.99214	7.86989	0.00502647	0.200916
Ss18l1	3.42876	2.01519	7.8693	0.00502812	0.200916
Mill2	-5.95485	1.60058	7.84378	0.00509958	0.201442
Nfkbia	-1.11923	5.63741	7.84311	0.00510146	0.201442
Nsun4	-1.87705	3.33247	7.85042	0.00508088	0.201442
Pcnx4	-3.53414	1.96871	7.81352	0.00518569	0.204021
Fkbp15	-1.12282	5.36377	7.79626	0.00523545	0.204269
Tdrd7	1.32331	6.20997	7.79116	0.00525025	0.204269
Kdm5c	1.28559	4.92831	7.80429	0.00521223	0.204269
Adi1	-2.21426	3.47576	7.78513	0.00526779	0.204269
Cct8	1.0199	8.12798	7.77383	0.00530087	0.204815
Ctsw	-1.61724	5.32	7.73636	0.00541198	0.205019
Ddit4	2.08192	4.17786	7.74693	0.00538039	0.205019
Eme1	-6.45444	1.76425	7.7153	0.00547547	0.205019
Cox7a2	1.77475	8.64261	7.69874	0.00552593	0.205019
k	2.26496	3.60161	7.7154	0.00547517	0.205019
Arg2	-2.73624	4.02046	7.7169	0.00547062	0.205019
Neto2	6.53701	0.932106	7.69599	0.00553436	0.205019
BC024063	-6.39054	0.969086	7.76254	0.00533408	0.205019
Hcar2	-3.40017	4.5079	7.71165	0.00548657	0.205019
Kbtbd3	-3.74716	2.40758	7.70243	0.00551465	0.205019
Nsmce1	1.16866	5.87002	7.69908	0.00552489	0.205019
Trir	1.11202	7.15494	7.72442	0.00544787	0.205019
Anp32e	1.5195	7.03752	7.68635	0.005564	0.205411
Smarcc2	-1.8518	3.18735	7.67734	0.00559184	0.205734
Paip2	1.61768	9.82479	7.55662	0.00597899	0.205742
Zfp202	-3.49296	1.61965	7.57882	0.00590582	0.205742
Pbld1	7.15214	1.44122	7.63084	0.00573787	0.205742
Trim56	1.32828	6.80463	7.57969	0.00590296	0.205742
Hspa12a	-4.42476	1.70525	7.5737	0.00592262	0.205742
Tjp3	3.74829	1.04473	7.65667	0.00565627	0.205742
Tfpi	6.40484	1.88776	7.608	0.00581099	0.205742
Zfyve21	-5.66879	1.72551	7.55154	0.00599587	0.205742
Gm13012	3.65729	1.97169	7.55157	0.00599578	0.205742
Slc7a1	-2.57499	2.61775	7.6344	0.00572655	0.205742
Timm29	-2.11183	3.7541	7.58075	0.00589949	0.205742
Lgals9	1.17939	7.7188	7.56933	0.00593697	0.205742
Tmem214	-1.32382	4.23558	7.55844	0.00597297	0.205742
Sec23ip	-1.19958	4.62225	7.58736	0.00587789	0.205742
Trip11	-1.57	4.09093	7.55244	0.00599288	0.205742
Dand5	2.97431	1.62385	7.60165	0.0058315	0.205742
2310075C17Rik	-6.71804	1.59725	7.607	0.00581422	0.205742
Mybpc3	-5.95613	0.320904	7.54672	0.00601194	0.205742
Tmco3	-1.61364	3.23367	7.61358	0.00579303	0.205742
Ddx39	1.01057	6.18257	7.63949	0.00571041	0.205742
Ifi27	1.59665	8.30565	7.58415	0.00588837	0.205742
Tatdn1	1.47734	4.2847	7.60748	0.00581268	0.205742
Ctdnep1	-1.27016	4.2935	7.488	0.00621116	0.207475
Map3k19	3.25231	2.2859	7.48643	0.00621656	0.207475
Cd33	-1.77658	5.68246	7.50222	0.00616231	0.207475
Selenot	1.4682	8.22083	7.49591	0.00618392	0.207475
Tuba8	-3.82308	3.35971	7.48812	0.00621074	0.207475
Nsmce4a	0.867829	6.86073	7.49756	0.00617826	0.207475
Klhl8	-5.92635	1.22827	7.49976	0.00617071	0.207475
Psme4	1.2886	7.47585	7.51574	0.00611623	0.207475
Rbbp4	1.18795	7.16101	7.4807	0.00623639	0.207495
Rap1a	1.24432	8.03311	7.47467	0.0062573	0.20755
Serbp1	0.932399	7.91775	7.46199	0.00630154	0.208376
Klf10	1.28876	4.29997	7.40011	0.00652198	0.208879
Eloc	1.20562	7.01936	7.41495	0.00646843	0.208879
Selenok	1.76124	7.54397	7.40486	0.0065048	0.208879
Gab2	1.53891	4.42721	7.43615	0.00639266	0.208879
Ift52	1.4275	3.84635	7.38729	0.00656864	0.208879
Esam	-1.87885	5.32858	7.41314	0.00647492	0.208879
Ubl4a	1.25421	5.33419	7.39029	0.00655769	0.208879
Sec62	1.30062	7.48379	7.4165	0.00646285	0.208879
Eif2s1	0.945151	7.02145	7.3879	0.00656642	0.208879
Paip2b	-1.42663	4.78901	7.44563	0.00635907	0.208879
Cenpk	1.68821	3.74892	7.44109	0.00637512	0.208879
Eogt	-2.69263	2.64797	7.39112	0.00655467	0.208879
Zfp27	2.26515	2.64343	7.39475	0.00654146	0.208879
Rpusd4	-1.62077	3.91805	7.3711	0.00662803	0.209417
Smyd2	-3.17127	2.65983	7.34442	0.00672713	0.209417
Zfp738	-1.75639	3.79683	7.34768	0.00671493	0.209417
Lcor	1.84216	3.9894	7.35013	0.00670581	0.209417
Lrrc59	-1.09285	5.15335	7.35309	0.00669475	0.209417
Mrps22	-1.81029	3.41394	7.36373	0.00665526	0.209417
Gvin1	1.88244	6.9701	7.35186	0.00669934	0.209417
Pgrmc2	1.78665	3.72895	7.34072	0.00674097	0.209417
St7	1.62911	4.78939	7.32761	0.00679031	0.210151
Sh2d1b1	1.53227	4.28035	7.3241	0.00680359	0.210151
Ptgs2os2	6.81007	0.651353	7.30578	0.00687331	0.211698
Ppm1b	1.37503	6.48655	7.2955	0.00691276	0.212306
0610009L18Rik	-5.93825	1.23851	7.26314	0.00703841	0.21266
Aip	1.71477	6.36734	7.27931	0.00697532	0.21266
Nars	1.547	8.2005	7.25704	0.00706236	0.21266
Oasl2	1.78233	9.58329	7.2578	0.00705937	0.21266
A330040F15Rik	5.08736	2.49678	7.27565	0.00698955	0.21266
Tmem39b	-3.76314	1.18843	7.27505	0.00699191	0.21266
Apcdd1	-5.80373	1.60379	7.26422	0.00703418	0.21266
Atp5j2	1.34289	7.56642	7.2517	0.00708341	0.2127
Golph3	1.18558	5.46034	7.24114	0.00712517	0.213359
Gpr34	-2.81252	2.48512	7.22693	0.00718179	0.214459
Sgsm2	-5.48459	1.11847	7.21066	0.00724717	0.215813
Kif9	2.51834	2.49717	7.18837	0.00733775	0.217259
Fam189b	-1.48301	4.17122	7.19342	0.00731713	0.217259
G3bp2	1.10794	7.76453	7.18387	0.00735617	0.217259
Spop	1.40642	7.94202	7.17889	0.00737664	0.217268
Mrpl30	1.02213	6.75834	7.17167	0.00740637	0.217549
Ifit1	1.88759	8.90084	7.14509	0.00751696	0.220198
Gnaz	-2.94704	3.02194	7.13351	0.00756563	0.221023
Wdr76	1.66018	3.47627	7.113	0.0076527	0.222962
Chst12	-3.10407	1.85706	7.09996	0.00770855	0.223521
Prpf18	1.23284	6.98018	7.09885	0.00771332	0.223521
Dnaja4	2.08192	7.12755	7.09239	0.00774117	0.223726
Haus7	2.50377	2.79479	7.08445	0.00777557	0.224028
Ccdc84	1.80177	2.98808	7.07871	0.00780051	0.224028
Fbxw2	1.34901	7.75253	7.07562	0.00781398	0.224028
Mtcp1	2.95389	1.90835	7.02644	0.00803146	0.226849
Slc29a3	2.5593	2.21927	7.03002	0.00801546	0.226849
Acadsb	1.63219	4.88781	7.02532	0.0080365	0.226849
Ube2s	1.19102	7.02531	7.03013	0.00801495	0.226849
Farp1	6.84359	1.04713	7.02979	0.00801647	0.226849
Wdr59	-2.94925	2.66375	7.02485	0.00803862	0.226849
Ap1s3	-2.32978	1.88108	7.01431	0.00808607	0.227592
Mmp19	-2.17649	5.0638	6.99822	0.00815906	0.228158
Nedd8	1.01318	6.88574	6.99425	0.00817722	0.228158
Csde1	1.08074	8.92208	6.99127	0.00819082	0.228158
Foxo3	1.32133	6.28068	7.00427	0.00813156	0.228158
Leng1	-1.56723	3.2045	6.97883	0.00824794	0.229157
Tnfrsf21	1.2752	4.02855	6.97075	0.00828528	0.229602
Ncln	-2.68789	2.05048	6.95772	0.00834582	0.230097
4930453N24Rik	0.890804	6.35358	6.95954	0.00833737	0.230097
P2ry13	-2.20987	4.30231	6.95152	0.0083748	0.230307
Mcee	1.58043	3.34166	6.94426	0.00840887	0.230465
Ift20	1.57146	6.72064	6.92762	0.00848745	0.230465
Rnf20	1.12363	7.08067	6.93703	0.0084429	0.230465
Tmem161a	1.70033	3.40847	6.93552	0.00845005	0.230465
Flywch1	-1.69893	3.71094	6.93064	0.00847315	0.230465
Hbs1l	1.05174	5.44959	6.92113	0.00851834	0.230723
Serp2	3.54396	1.30235	6.85472	0.00884076	0.231394
Kif14	-6.41239	1.06946	6.89342	0.00865137	0.231394
Slc16a12	6.41658	1.57786	6.87689	0.00873174	0.231394
Ttc33	1.37849	6.45258	6.87243	0.00875357	0.231394
Rela	-2.14362	3.01589	6.8602	0.00881367	0.231394
Cct7	1.19003	8.35852	6.89431	0.00864704	0.231394
Tab3	2.01536	5.7172	6.85413	0.00884365	0.231394
Rdh14	-2.50272	3.41049	6.90669	0.00858737	0.231394
Ophn1	-2.5101	2.06537	6.89359	0.00865052	0.231394
Nod2	-5.98	1.43179	6.86904	0.00877019	0.231394
Atp6v1g1	1.17385	7.54974	6.87571	0.00873751	0.231394
Parp16	3.21485	1.99384	6.87575	0.00873733	0.231394
Sema6d	-5.97192	0.801508	6.90628	0.00858933	0.231394
Hsd17b12	-1.06409	5.12481	6.85916	0.00881881	0.231394
Gpm6a	-6.15966	0.82713	6.84817	0.0088732	0.231606
Peli2	5.94603	0.936598	6.82941	0.00896688	0.232165
Spg7	1.24486	5.38083	6.82324	0.00899793	0.232165
Mxra8	-6.37861	2.18081	6.8181	0.00902387	0.232165
Paxip1	-1.64916	3.34796	6.822	0.00900419	0.232165
Pvrig	-6.21119	0.941204	6.83432	0.00894225	0.232165
Gm5526	1.47463	4.50118	6.81948	0.0090169	0.232165
Vbp1	1.3586	7.37619	6.80183	0.00910644	0.233732
Zfp773	-1.78976	2.74708	6.78303	0.00920287	0.234473
Bcas2	1.2795	6.08524	6.76301	0.00930667	0.234473
9930012K11Rik	-2.71952	2.21556	6.75418	0.00935283	0.234473
Sparcl1	6.95661	1.91945	6.76603	0.00929095	0.234473
Umad1	-2.01814	2.97141	6.75812	0.0093322	0.234473
1700020I14Rik	1.73608	9.9961	6.78172	0.0092096	0.234473
Cystm1	7.36041	1.5278	6.77791	0.00922927	0.234473
Zc3h15	1.18018	7.5652	6.75777	0.00933405	0.234473
Tmem183a	1.1005	6.56248	6.78529	0.00919122	0.234473
Camta1	-2.45927	2.11671	6.75661	0.0093401	0.234473
Arfip2	-2.1168	3.52845	6.74169	0.00941856	0.235028
Abcc3	2.71983	2.49459	6.74264	0.00941351	0.235028
Mtmr3	1.6141	8.62151	6.72178	0.00952424	0.23609
Slc9a1	3.25189	1.41295	6.72828	0.00948959	0.23609
Fdxacb1	-2.30108	2.80812	6.7213	0.00952684	0.23609
Amer2	-5.86554	1.05286	6.71713	0.00954911	0.2361
Vcp	1.10168	8.49004	6.70285	0.00962587	0.237271
Rbm18	1.07624	4.94399	6.70014	0.00964052	0.237271
Nudt4	1.0894	6.88493	6.6739	0.0097835	0.240242
Ubr3	1.2825	5.57748	6.66208	0.00984861	0.240397
1110046J04Rik	-5.86239	2.22575	6.65658	0.00987901	0.240397
Tgtp2	1.36876	9.01547	6.66806	0.00981557	0.240397
Syne2	-1.57006	3.17923	6.66019	0.00985904	0.240397
Picalm	0.927995	8.70544	6.64779	0.00992791	0.241042
Dnttip1	1.26863	5.07866	6.63806	0.00998226	0.241275
Zwint	1.08429	6.73342	6.63928	0.00997545	0.241275
Mat2b	1.34533	7.9026	6.60728	0.0101563	0.241645
Arhgef2	-0.96748	5.56731	6.61975	0.0100854	0.241645
Sh2b1	2.18709	2.69671	6.6024	0.0101841	0.241645
Ahcyl1	-0.93862	5.23608	6.61688	0.0101017	0.241645
Chp1	1.6839	7.96545	6.61735	0.010099	0.241645
Top1	1.16264	6.48561	6.60664	0.0101599	0.241645
Pbrm1	1.56839	6.93014	6.61422	0.0101168	0.241645
Gm19605	2.21302	2.03565	6.59975	0.0101993	0.241645
Pck2	1.4754	5.75952	6.63051	0.0100247	0.241645
Dnajb4	1.34941	5.77244	6.59345	0.0102354	0.24197
Cetn2	1.23621	6.61328	6.58719	0.0102715	0.242291
Cdk12	1.54363	5.11009	6.58198	0.0103016	0.24247
Rfc3	-1.73387	3.98791	6.57801	0.0103246	0.242483
Atp5j	1.42051	6.58404	6.5732	0.0103526	0.24261
Chil1	-2.15145	5.564	6.56669	0.0103905	0.242971
Plpp6	-2.02577	3.24558	6.54427	0.0105223	0.243091
Trip12	1.20736	8.45966	6.54453	0.0105207	0.243091
Cpd	1.3736	4.96521	6.5428	0.0105309	0.243091
Gm15518	2.64394	3.43127	6.55872	0.0104371	0.243091
Tmem135	-1.23334	4.03072	6.55595	0.0104534	0.243091
Tesc	-2.12369	3.37794	6.54744	0.0105035	0.243091
Ubxn2a	1.46387	6.03112	6.53781	0.0105606	0.243254
Pigb	-2.80772	1.99937	6.52824	0.0106175	0.244045
Arrdc3	1.08633	6.07911	6.52207	0.0106544	0.244371
Usp4	0.82256	6.69233	6.51063	0.0107231	0.244727
Bhlhe41	-3.88406	1.72202	6.51114	0.0107201	0.244727
Pdk3	1.06554	5.90055	6.50441	0.0107607	0.244727
6030458C11Rik	1.30831	4.44605	6.50655	0.0107478	0.244727
Selenoi	-1.89366	3.41352	6.4926	0.0108324	0.24584
Hipk1	1.47379	8.19279	6.46765	0.0109856	0.247233
Fut8	1.21006	4.55085	6.475	0.0109402	0.247233
Map2k3	1.38926	5.56706	6.47024	0.0109695	0.247233
Ssbp3	1.48212	5.66337	6.47083	0.0109659	0.247233
Serinc1	2.19448	9.38137	6.45718	0.0110505	0.248175
Brpf3	1.96183	4.09643	6.45332	0.0110745	0.248198
Dhrs13	-4.0227	1.25227	6.44771	0.0111096	0.248467
Chmp3	0.977356	7.10566	6.43479	0.0111906	0.248855
Usp54	-5.61367	1.22537	6.43524	0.0111878	0.248855
Psmd3	-1.24568	4.62668	6.42594	0.0112466	0.248855
Uba1	1.16017	6.72797	6.42296	0.0112654	0.248855
Wdr5	-1.40389	4.32855	6.42421	0.0112575	0.248855
Nfkbie	-1.28338	4.61847	6.42558	0.0112488	0.248855
Ighv1.76	5.23301	0.989715	6.39312	0.0114563	0.251015
Gm10180	2.76863	2.39522	6.39517	0.0114431	0.251015
Slc40a1	1.61961	5.54402	6.40176	0.0114007	0.251015
Mcpt4	-7.48575	2.55771	6.40009	0.0114115	0.251015
2810002D19Rik	2.66901	2.00545	6.38556	0.0115052	0.251575
Lrp12	-5.87692	0.749335	6.37144	0.0115971	0.252609
Aunip	-6.08809	1.294	6.37109	0.0115994	0.252609
Tnpo1	0.985104	6.79605	6.36517	0.0116382	0.252943
Gsdme	-3.33679	2.08709	6.3529	0.0117189	0.254186
Pex13	1.10949	4.50892	6.34439	0.0117753	0.254348
Ccny	0.853191	6.36117	6.34027	0.0118027	0.254348
Gpx4.ps2	1.54007	5.15098	6.34208	0.0117907	0.254348
Cnnm4	-2.49904	2.56896	6.33755	0.0118208	0.254348
E130102H24Rik	-3.62903	1.5882	6.32277	0.0119197	0.255456
Tbc1d2	-5.22595	2.28906	6.32435	0.0119091	0.255456
Fpr2	-1.36422	7.03406	6.31781	0.0119531	0.255664
A430105I19Rik	5.97474	0.893113	6.31138	0.0119965	0.256085
Vrk2	1.13198	4.89752	6.27648	0.0122351	0.256105
Las1l	-1.0929	4.23453	6.28686	0.0121637	0.256105
Txnl1	1.12529	7.02502	6.30389	0.0120473	0.256105
Esco2	1.8806	5.78275	6.28487	0.0121773	0.256105
Gnaq	-1.667	4.25032	6.28432	0.0121811	0.256105
Gm33111	2.27663	3.72821	6.30474	0.0120415	0.256105
Slc3a2	1.44835	7.66829	6.27695	0.0122318	0.256105
Irf1	-1.21523	8.33599	6.29042	0.0121392	0.256105
Fbxw9	4.22006	1.28878	6.28152	0.0122003	0.256105
Enpp5	2.26577	3.1905	6.29124	0.0121336	0.256105
Tmem29	1.51303	5.35817	6.26651	0.0123041	0.25612
Ccdc174	1.11876	4.85514	6.26974	0.0122817	0.25612
Atp5h	1.32256	9.49798	6.26315	0.0123275	0.25612
Asna1	0.989338	5.8972	6.26267	0.0123308	0.25612
Aicda	5.86426	1.19897	6.25518	0.012383	0.256217
Klk8	-1.06976	4.44503	6.25607	0.0123769	0.256217
Lsm2	-3.09166	1.86744	6.24076	0.0124843	0.257324
Ndufa5	1.42091	4.90693	6.2434	0.0124657	0.257324
Rpf2	-1.5027	4.37484	6.21775	0.0126476	0.257347
Dcun1d1	1.72286	7.56003	6.22938	0.0125648	0.257347
Scfd1	-0.916738	5.65794	6.21867	0.012641	0.257347
Vcam1	5.70388	1.68068	6.21706	0.0126525	0.257347
Oas1e	2.60325	4.95982	6.22168	0.0126195	0.257347
Prmt5	-1.20065	5.07418	6.23503	0.0125247	0.257347
Snx10	-0.965189	6.43483	6.21844	0.0126426	0.257347
Otud5	1.36592	8.11604	6.1896	0.0128503	0.257657
Plau	-5.97859	1.2408	6.15872	0.0130766	0.257657
Nudt5	1.23817	4.98312	6.16735	0.0130129	0.257657
Myo9a	-1.50881	3.32212	6.20583	0.012733	0.257657
Hist2h2be	2.31011	2.77926	6.16774	0.0130101	0.257657
S100pbp	-1.76903	3.38995	6.20435	0.0127437	0.257657
Haspin	-1.97917	3.44977	6.16593	0.0130234	0.257657
Abcf1	1.04666	5.75779	6.15501	0.0131041	0.257657
Tcea1	1.01936	6.44624	6.16165	0.013055	0.257657
Cops5	0.789871	5.70595	6.13988	0.0132166	0.257657
Rpap1	-2.44962	1.9772	6.14194	0.0132013	0.257657
Anapc13	1.61806	5.65205	6.14691	0.0131642	0.257657
Tspyl1	1.16864	6.93176	6.19631	0.0128017	0.257657
Babam2	1.14124	4.14892	6.16838	0.0130054	0.257657
Tmem163	-2.13146	3.05468	6.13678	0.0132398	0.257657
Exoc7	-1.28917	4.69811	6.13339	0.0132652	0.257657
Gcsam	-3.4781	2.68623	6.13519	0.0132517	0.257657
Zfp513	-2.06482	2.35465	6.17905	0.0129272	0.257657
Gm26799	-5.10802	1.62191	6.20911	0.0127094	0.257657
Serf2	1.0506	8.16557	6.19126	0.0128383	0.257657
Tab2	1.15575	6.79725	6.1483	0.0131538	0.257657
Heatr5b	-1.34118	3.71543	6.17636	0.0129468	0.257657
Mthfd2	1.99433	7.59961	6.15558	0.0130998	0.257657
Taf10	0.875615	6.20052	6.15515	0.013103	0.257657
Arl4d	-2.23658	2.23598	6.17304	0.0129711	0.257657
Gm13206	-5.79064	1.48611	6.12914	0.0132971	0.257812
Bbs9	1.74427	3.71277	6.11866	0.0133762	0.257952
Itgb2l	-3.34563	3.87743	6.12076	0.0133604	0.257952
Tor2a	-1.26332	4.4394	6.12011	0.0133652	0.257952
Gsta2	-3.22627	4.20544	6.11324	0.0134173	0.258282
Mcemp1	-1.41248	7.52768	6.10807	0.0134566	0.258577
Il27	-2.61581	1.83512	6.1031	0.0134945	0.258845
1810034E14Rik	-3.26446	1.81711	6.09939	0.0135229	0.258928
Tpm1	1.56635	7.89703	6.06857	0.0137608	0.263017
Frg1	1.04637	6.78303	6.04671	0.0139322	0.264418
Pdp1	1.83348	3.27131	6.04977	0.0139081	0.264418
Timm8a1	-2.6073	2.53596	6.05045	0.0139028	0.264418
D5Ertd579e	1.72621	7.19413	6.04858	0.0139175	0.264418
B4gat1	-3.09836	1.78708	6.03911	0.0139923	0.265092
Serinc3	1.57291	11.5442	6.03549	0.014021	0.26517
D030028A08Rik	-3.01086	1.64239	6.01725	0.0141667	0.265523
Cep78	-2.75122	3.01643	6.01455	0.0141884	0.265523
Gm36328	-5.54138	2.38434	6.01634	0.014174	0.265523
Nupl2	1.64063	2.73133	6.01392	0.0141935	0.265523
Ftl1	1.95369	13.1666	6.00327	0.0142794	0.265523
Prnp	2.26867	5.97908	6.01144	0.0142135	0.265523
Kdm7a	1.32135	7.32704	5.99335	0.0143599	0.265523
C330018D20Rik	1.52825	4.34571	6.00552	0.0142612	0.265523
4833418N02Rik	-5.588	1.12699	6.02896	0.014073	0.265523
Oip5	1.58323	3.96612	6.01712	0.0141678	0.265523
Cox7c	1.02414	7.14473	5.99686	0.0143314	0.265523
Fam103a1	1.53009	7.19031	5.99923	0.0143122	0.265523
Zfp384	-1.1787	3.98543	5.99634	0.0143356	0.265523
Ndufv2	0.871583	6.33055	5.97892	0.0144779	0.266483
Fbxl14	-1.01921	4.80757	5.97793	0.014486	0.266483
Swt1	1.45576	6.45939	5.98217	0.0144512	0.266483
Irf6	-3.71113	1.58325	5.97075	0.0145451	0.267114
Pcbp4	3.68744	1.26663	5.96307	0.0146086	0.267825
Magohb	-2.05805	3.5456	5.9268	0.0149123	0.267972
2310011J03Rik	-1.21004	4.31397	5.91187	0.0150392	0.267972
Zfp983	-2.16083	2.66664	5.9278	0.0149038	0.267972
Edem2	-1.15548	4.82959	5.93617	0.0148332	0.267972
Ost4	1.46136	8.52981	5.94453	0.014763	0.267972
Polr2c	1.34719	7.19638	5.91519	0.0150109	0.267972
Ccdc189	2.25637	4.04198	5.92172	0.0149554	0.267972
Atp5k	1.4374	7.51722	5.91716	0.0149941	0.267972
Nrd1	1.12355	7.75966	5.95407	0.0146833	0.267972
Ogt	1.10179	8.06066	5.92585	0.0149203	0.267972
Brcc3	1.04797	5.77875	5.93678	0.014828	0.267972
Incenp	1.15987	4.7729	5.95185	0.0147019	0.267972
Alms1	3.35054	2.15324	5.95267	0.014695	0.267972
Tmem11	-2.80204	1.87708	5.93319	0.0148583	0.267972
Itm2b	1.02219	10.4976	5.94469	0.0147617	0.267972
Trim12c	1.32447	7.6783	5.93488	0.0148441	0.267972
Gria3	5.56888	0.791402	5.91251	0.0150338	0.267972
Orai1	-1.58162	3.51486	5.90379	0.0151084	0.26876
Nme6	2.40712	2.61249	5.89897	0.0151498	0.269052
Mss51	-3.13024	1.61078	5.89441	0.015189	0.269305
Bean1	-3.45517	2.63472	5.8823	0.0152938	0.270719
Ncoa2	0.937449	4.76387	5.87541	0.0153538	0.27089
Arhgap1	-1.23367	4.64903	5.87576	0.0153508	0.27089
Smim4	1.93482	5.07827	5.80336	0.0159956	0.275736
Zfp324	2.1799	2.40132	5.8158	0.0158828	0.275736
Syt13	-5.45525	3.58973	5.83603	0.0157012	0.275736
Scoc	1.70852	5.36045	5.82846	0.015769	0.275736
Clec4d	-1.3031	7.41818	5.8404	0.0156622	0.275736
Dtd2	-1.79526	2.57371	5.80439	0.0159862	0.275736
Azin1	1.76653	9.52739	5.81537	0.0158867	0.275736
Bcor	-1.17599	4.15062	5.80682	0.0159641	0.275736
Itgae	-2.48576	2.95572	5.83137	0.0157429	0.275736
Trim32	-5.20926	1.34901	5.82255	0.015822	0.275736
Gsto1	1.31365	5.87512	5.81652	0.0158763	0.275736
Crim1	2.85452	2.42115	5.81181	0.0159189	0.275736
Ccdc9	-1.42465	3.72211	5.80154	0.0160121	0.275736
Cript	1.57625	8.50039	5.80312	0.0159978	0.275736
Gnl2	-0.908092	5.4859	5.8078	0.0159552	0.275736
Gbp7	1.19932	7.20916	5.7951	0.0160709	0.275866
Pik3ip1	-0.987985	5.62717	5.79706	0.016053	0.275866
Draxin	-2.28839	5.11933	5.78039	0.0162059	0.277465
Dmac1	1.08821	4.49302	5.77936	0.0162155	0.277465
Rnf4	-0.769313	6.43549	5.77043	0.016298	0.278436
Tmem234	0.91913	7.41641	5.75664	0.0164265	0.279743
Rb1cc1	0.971992	6.49343	5.75747	0.0164187	0.279743
Sec13	0.911405	6.85984	5.75257	0.0164645	0.279949
Cd59b	2.02542	3.64175	5.7479	0.0165084	0.280253
A930015D03Rik	2.74356	2.27401	5.74048	0.0165783	0.280997
Nudt9	1.22101	4.58398	5.73519	0.0166282	0.281401
Cd8a	-1.35479	6.51884	5.72525	0.0167227	0.282555
Cd82	1.38611	7.35673	5.71563	0.0168146	0.282625
Mrpl47	-1.44613	3.73774	5.71391	0.016831	0.282625
Trim30c	4.33538	3.06855	5.71571	0.0168137	0.282625
Mastl	3.08885	1.92301	5.71384	0.0168317	0.282625
Slc25a38	1.19049	4.54417	5.7008	0.0169571	0.283309
Pik3cb	-1.45222	4.4007	5.69898	0.0169748	0.283309
Tmem9b	-0.835658	5.824	5.70108	0.0169545	0.283309
Mlst8	1.83051	3.33226	5.6987	0.0169775	0.283309
Nprl3	1.13847	5.02108	5.69145	0.0170478	0.283621
Immp1l	1.17304	5.55254	5.67849	0.0171741	0.283621
2010005H15Rik	5.46348	1.60398	5.67543	0.0172041	0.283621
1700037C18Rik	2.78908	2.02753	5.68527	0.0171079	0.283621
Gm47792	7.5169	0.365829	5.68374	0.0171228	0.283621
Cox6a1	1.567	8.5838	5.67517	0.0172067	0.283621
Snhg20	-1.77752	2.66453	5.67638	0.0171948	0.283621
Timm17b	1.13533	5.02717	5.68617	0.0170991	0.283621
Fam173a	-1.62305	4.02527	5.66684	0.0172886	0.283848
Anxa8	-5.35467	0.817039	5.66951	0.0172623	0.283848
Ppp2r1b	1.08591	4.72387	5.66574	0.0172994	0.283848
Tnip1	-1.91913	2.26838	5.65347	0.0174209	0.284423
Stk19	-1.83891	3.21092	5.65241	0.0174314	0.284423
Gm17259	3.55871	2.00345	5.65154	0.0174401	0.284423
Bloc1s2	-1.14034	4.63458	5.65404	0.0174152	0.284423
Map3k3	1.15061	5.00843	5.64687	0.0174865	0.284751
Suds3	1.38926	7.88377	5.63552	0.0176002	0.286168
Zfp113	-1.97043	2.72066	5.61964	0.0177603	0.286325
2310031A07Rik	-4.12688	1.72057	5.61515	0.0178059	0.286325
Dvl2	3.62743	0.979707	5.62401	0.0177161	0.286325
Calm3	1.03212	7.87885	5.61353	0.0178223	0.286325
Trim59	1.50282	7.11755	5.62993	0.0176564	0.286325
Atg5	-1.0256	5.11799	5.62599	0.017696	0.286325
Gpr108	-1.54452	3.43435	5.61722	0.0177849	0.286325
Nat8l	2.70774	1.63099	5.62651	0.0176908	0.286325
Usf3	1.27963	4.85066	5.60847	0.0178738	0.286726
Gpsm2	1.34653	4.32414	5.60566	0.0179026	0.28676
Gm45716	-2.5323	3.33245	5.59908	0.0179699	0.287412
Lrp10	-0.958275	5.43212	5.5889	0.0180746	0.288231
Hmgn5	1.80827	2.78758	5.59069	0.0180561	0.288231
Dip2c	5.31185	1.46376	5.57665	0.0182015	0.2896
Gpx4	1.39514	9.45832	5.57285	0.0182411	0.2896
Ptpro	-1.05368	5.37569	5.57452	0.0182236	0.2896
Gabarap	1.17812	9.72706	5.56903	0.0182809	0.289807
Mink1	2.42334	2.45999	5.56217	0.0183527	0.290517
Hmgb3	-3.78902	1.98433	5.55904	0.0183855	0.290609
Coq4	-3.45	1.83738	5.55589	0.0184186	0.290706
Aplp2	1.63733	4.54455	5.54978	0.018483	0.291297
Slc15a4	-0.846135	5.31012	5.53361	0.0186546	0.292675
Tgm1	-5.28365	1.26379	5.53131	0.0186791	0.292675
Rfx2	1.75368	3.54444	5.53163	0.0186757	0.292675
Aplf	1.44629	3.60413	5.53279	0.0186634	0.292675
Gucy1a1	-2.9419	2.47946	5.52532	0.0187432	0.293253
Prorsd1	-1.45375	3.9689	5.50902	0.0189186	0.294715
Dcaf8	0.821042	6.92637	5.51075	0.0188999	0.294715
Snx3	1.26074	7.0148	5.51102	0.018897	0.294715
Usp39	-0.942404	5.51943	5.49588	0.0190613	0.296082
C2cd5	1.0763	5.23697	5.49624	0.0190574	0.296082
Ptprv	4.93924	1.13014	5.48589	0.0191705	0.29735
Tprgl	0.915271	7.93354	5.47813	0.0192559	0.298245
Tlr2	-1.09453	5.47183	5.47066	0.0193383	0.29877
Fth1	1.51804	10.675	5.47003	0.0193452	0.29877
I830127L07Rik	-1.13984	6.58399	5.46549	0.0193956	0.29912
Gypc	1.18653	4.64309	5.45758	0.0194836	0.299193
Gpatch11	-1.13725	4.30905	5.45822	0.0194765	0.299193
Scaper	1.18611	4.02565	5.46105	0.019445	0.299193
Sin3b	1.08916	7.76233	5.45482	0.0195144	0.299229
Ube2d3	0.917256	8.64254	5.4524	0.0195415	0.299229
Rnf114	1.37039	9.48395	5.44081	0.0196716	0.3007
Slc35a1	1.63235	3.59339	5.43887	0.0196934	0.3007
Mettl15	1.88584	2.59162	5.43078	0.0197848	0.30118
Calcrl	1.61842	4.87417	5.42849	0.0198108	0.30118
Ccr3	2.05132	4.46192	5.43192	0.0197719	0.30118
4833439L19Rik	1.26268	5.82161	5.42622	0.0198365	0.30118
Becn1	1.63836	10.1783	5.42132	0.0198923	0.301603
Kif3c	-2.282	2.77552	5.40877	0.0200359	0.301657
Bsg	1.64647	9.74777	5.41027	0.0200186	0.301657
Hadhb	0.872322	7.11032	5.41599	0.0199532	0.301657
H3f3a	1.56152	11.7293	5.41217	0.0199968	0.301657
Kpna3	0.898065	4.9515	5.41063	0.0200145	0.301657
Ncoa1	-1.64496	3.03359	5.40434	0.0200868	0.301846
Pet100	1.42564	7.22499	5.40281	0.0201044	0.301846
Ptbp2	-1.78631	3.87145	5.37549	0.0204216	0.306182
Aoc2	-2.75358	1.53255	5.37116	0.0204724	0.306517
Ccdc127	-1.04355	4.48572	5.3649	0.0205459	0.307092
Klrc3	5.48229	0.69733	5.36305	0.0205678	0.307092
Ly6k	-5.39013	1.14411	5.3506	0.0207151	0.307786
Rrp8	-1.95081	3.33778	5.34948	0.0207284	0.307786
Zer1	-1.60685	3.08959	5.35265	0.0206908	0.307786
Dlg3	4.0706	1.45434	5.34953	0.0207278	0.307786
Cep76	1.86785	5.86758	5.32679	0.0210001	0.30911
Lsm5	-1.16783	4.1836	5.32821	0.0209829	0.30911
Mrps15	-1.07086	5.01762	5.33263	0.0209298	0.30911
Lbp	-5.69389	2.2821	5.32621	0.0210071	0.30911
Atg12	1.14851	6.94635	5.32527	0.0210183	0.30911
Ppm1e	2.37444	3.04377	5.3298	0.0209638	0.30911
Malsu1	-1.56076	3.77026	5.33049	0.0209555	0.30911
Slc30a9	1.43911	7.16044	5.30871	0.0212191	0.30916
Gm11827	-6.28495	0.439405	5.30843	0.0212225	0.30916
Tsen54	-1.76031	2.90772	5.31273	0.0211702	0.30916
Tspoap1	-5.15134	1.22076	5.31825	0.0211032	0.30916
Cox8a	1.05959	7.89806	5.30937	0.021211	0.30916
Ccdc59	-0.936673	4.66778	5.3177	0.0211099	0.30916
Txnl4b	-2.65605	1.82389	5.31503	0.0211422	0.30916
S100a8	-1.50748	11.4703	5.29278	0.021414	0.311528
Trim23	1.30931	4.00332	5.28586	0.0214993	0.312348
Galnt1	1.59695	8.91277	5.27635	0.021617	0.313636
Rit1	0.94865	6.30672	5.26779	0.0217236	0.314758
Rbm33	1.28785	6.95187	5.25887	0.0218351	0.31595
Psmd4	1.2798	9.08798	5.25622	0.0218685	0.316009
Cxcl10	-2.97577	4.79069	5.25016	0.0219448	0.316263
Cars	-1.47337	4.3294	5.25131	0.0219303	0.316263
Lrig2	1.70491	3.88396	5.2475	0.0219783	0.316323
Prokr1	2.42024	3.47845	5.22074	0.0223191	0.317692
Sp100	0.907246	8.01192	5.21335	0.0224141	0.317692
Igip	-2.49556	2.56202	5.22288	0.0222916	0.317692
Gm16174	-5.79801	0.55877	5.22123	0.0223128	0.317692
Fam109a	-3.1528	1.5129	5.2259	0.0222529	0.317692
Nbr1	1.15456	7.02288	5.21873	0.0223448	0.317692
Tmx1	1.09526	5.74825	5.21234	0.0224271	0.317692
Gpr65	-0.986372	5.11713	5.22201	0.0223028	0.317692
Gm45902	-2.73438	1.37198	5.21453	0.022399	0.317692
Acp1	1.40551	7.45776	5.22516	0.0222624	0.317692
Socs4	-0.959748	4.53858	5.22769	0.0222301	0.317692
Nae1	-1.00674	4.8994	5.22629	0.0222479	0.317692
Dok2	-1.2865	5.56698	5.20337	0.0225431	0.318499
Mob2	0.943041	6.09056	5.20455	0.0225278	0.318499
B130034C11Rik	-6.06261	0.688457	5.19491	0.0226531	0.319407
Pitrm1	1.77949	7.01617	5.19388	0.0226666	0.319407
Zbtb34	3.24445	1.29642	5.17945	0.0228556	0.319978
Minos1	1.19736	4.81422	5.17988	0.02285	0.319978
Gga3	-1.65297	3.48741	5.18522	0.0227798	0.319978
Wwp1	1.08013	4.39908	5.18381	0.0227983	0.319978
Cfap20	1.1531	3.9284	5.18256	0.0228147	0.319978
Cyb5r1	1.23891	5.18197	5.17556	0.0229068	0.32018
Cblb	1.30537	4.11467	5.17384	0.0229294	0.32018
Olfr56	2.10535	3.47033	5.16936	0.0229886	0.320592
Gm12276	-5.10413	0.994251	5.163	0.0230731	0.320939
Nans	-1.20112	5.34952	5.16408	0.0230586	0.320939
Mki67	1.3622	7.9909	5.15983	0.0231152	0.32111
2810402E24Rik	-2.81123	1.7789	5.15484	0.0231817	0.32162
Thap1	-2.91735	1.82906	5.15138	0.023228	0.321847
3110002H16Rik	1.26728	7.00833	5.14669	0.0232907	0.322303
Nhlrc2	1.23089	3.68561	5.1352	0.0234454	0.322621
Gatb	-1.87548	3.01809	5.12724	0.0235531	0.322621
Fbxo7	1.38885	7.21526	5.11603	0.0237058	0.322621
Exog	-2.55452	1.93197	5.12076	0.0236412	0.322621
Rps6ka4	-1.63405	3.74936	5.12646	0.0235638	0.322621
Ap1g2	-1.5905	2.93445	5.14116	0.0233651	0.322621
Hook1	2.18073	2.92618	5.13567	0.0234391	0.322621
Ric1	-1.94541	2.89515	5.13694	0.0234219	0.322621
Golga7	1.12899	6.28552	5.12303	0.0236104	0.322621
Dnajb6	1.7383	9.32379	5.12025	0.0236482	0.322621
Plpp2	-3.10083	1.83494	5.11606	0.0237054	0.322621
Stk3	1.43127	5.49946	5.11406	0.0237327	0.322621
Mllt3	1.45395	7.69233	5.11459	0.0237255	0.322621
Ubp1	0.866147	6.49138	5.12842	0.0235371	0.322621
Rbfa	-1.1096	4.51593	5.1041	0.0238693	0.32407
Traf2	-0.960233	5.14566	5.09927	0.0239359	0.324564
Gng2	-0.868718	6.04276	5.09282	0.0240251	0.325305
Tax1bp1	1.55808	10.4441	5.09096	0.0240509	0.325305
Zbtb25	1.24752	3.45104	5.08782	0.0240945	0.325487
Rnf14	1.17396	5.70377	5.08364	0.0241527	0.325864
Tsfm	-1.57224	2.99808	5.07865	0.0242222	0.326395
Ndufa1	1.58491	7.92543	5.0734	0.0242957	0.326976
Adk	1.16622	5.62379	5.06349	0.024435	0.328441
kr8	-1.9318	2.39756	5.04621	0.0246798	0.329093
Lrrc29	-2.44048	2.42558	5.04712	0.0246669	0.329093
Mga	1.03915	5.33173	5.0521	0.0245962	0.329093
4930481A15Rik	2.45132	1.71416	5.04645	0.0246765	0.329093
Stim2	1.12639	4.27928	5.05213	0.0245957	0.329093
Gm26782	-2.52386	2.18742	5.04499	0.0246973	0.329093
Tmbim4	0.933886	5.65383	5.05085	0.0246139	0.329093
Ank	1.39831	5.15734	5.03576	0.0248292	0.329443
Snrpd3	-1.37896	3.92313	5.0346	0.0248458	0.329443
Gdi1	0.88107	5.85717	5.03695	0.0248121	0.329443
Ocln	-6.30268	0.758593	5.03654	0.024818	0.329443
Camk2g	1.44554	3.30296	5.02569	0.024974	0.330737
Nub1	0.698225	5.89359	5.01559	0.02512	0.331533
Ogfrl1	1.39757	6.81247	5.01896	0.0250712	0.331533
Fbxw10	-5.72753	0.941857	5.01515	0.0251264	0.331533
Add1	1.14005	4.78263	5.00884	0.0252183	0.332338
Ndufs6	1.14666	5.3013	5.00489	0.0252758	0.33269
Selenof	0.964856	7.98475	4.99911	0.0253604	0.33299
1110025M09Rik	2.25556	1.96857	4.99986	0.0253494	0.33299
Mfsd11	2.26895	2.63259	4.99165	0.02547	0.334022
Creg1	1.69983	10.8707	4.98077	0.0256306	0.334501
Atp6v1f	1.01634	5.40436	4.9818	0.0256154	0.334501
Ube2e3	1.5956	6.86915	4.98311	0.025596	0.334501
Fam72a	-3.6614	0.918915	4.98079	0.0256303	0.334501
Fam104a	1.46889	4.43843	4.97648	0.0256943	0.334522
S100a9	-1.43469	11.8728	4.9768	0.0256895	0.334522
Mrpl32	1.36438	6.9688	4.96593	0.0258514	0.336161
Zfp719	1.60386	3.16635	4.96367	0.0258852	0.336196
Mgat1	-0.891672	4.98124	4.95508	0.0260141	0.336388
Igfbp6	-5.10253	0.931874	4.95911	0.0259536	0.336388
Npc1	0.966862	4.83562	4.95541	0.0260091	0.336388
Mettl14	-1.05304	3.65533	4.95437	0.0260248	0.336388
Rps2	0.953742	10.3033	4.95106	0.0260746	0.336628
Adipoq	-5.68222	1.14374	4.94287	0.0261984	0.337732
Gm6637	-2.73928	3.11033	4.94127	0.0262228	0.337732
Ldhb	-2.59492	3.75463	4.93833	0.0262675	0.337904
9130221H12Rik	1.81935	3.15264	4.93474	0.026322	0.338201
Bag1	1.47391	9.84955	4.93066	0.0263843	0.338599
Tomm40l	-1.43623	4.18879	4.92788	0.0264267	0.338719
Stard8	-2.39893	2.44141	4.92593	0.0264565	0.338719
Atp5e	1.15031	7.98639	4.92191	0.0265182	0.339106
Mturn	1.14993	4.1285	4.91864	0.0265685	0.339145
Midn	-1.75078	3.20922	4.91606	0.0266081	0.339145
Ctdsp2	0.8745	5.02895	4.91557	0.0266157	0.339145
Rab11a	1.05864	6.52163	4.91193	0.0266719	0.33946
Zfp768	-4.92459	1.19075	4.90906	0.0267162	0.339624
Mest	-2.3332	4.50369	4.90645	0.0267565	0.339736
Arl4a	1.48546	6.80885	4.90141	0.0268348	0.340328
Acad10	-3.40549	1.38839	4.89732	0.0268985	0.340735
Spice1	1.03165	3.9166	4.89453	0.0269419	0.340885
Ttc19	2.74011	2.26189	4.87738	0.027211	0.342749
Taf11	-1.33305	3.64779	4.86804	0.0273586	0.342749
Txnrd1	-1.42731	3.68787	4.87524	0.0272446	0.342749
Tmem134	0.984102	7.01706	4.87899	0.0271855	0.342749
Erlec1	1.19481	5.81623	4.86941	0.0273368	0.342749
Idua	-2.38831	2.62894	4.8671	0.0273735	0.342749
Bcl3	-2.7786	0.838131	4.87622	0.0272292	0.342749
Hgf	2.84469	2.0155	4.86698	0.0273754	0.342749
Aacs	-1.37657	3.75577	4.87173	0.0273002	0.342749
Optn	1.36772	6.22399	4.86333	0.0274333	0.343075
Nif3l1	-1.22013	4.21832	4.85473	0.0275704	0.343304
Tmx2	0.890474	4.66064	4.8569	0.0275357	0.343304
Slx4ip	1.49133	2.92626	4.85361	0.0275883	0.343304
Unkl	1.93503	3.2307	4.85783	0.027521	0.343304
Fbxo8	0.921772	4.71711	4.85141	0.0276235	0.343304
Ubald2	1.00775	4.89393	4.85022	0.0276426	0.343304
Ptdss2	1.39733	4.33768	4.84173	0.027779	0.34396
Rnf187	0.737292	6.09462	4.84125	0.0277868	0.34396
Etfdh	-0.988319	4.91463	4.839	0.0278231	0.34396
Zfp326	2.11366	2.09641	4.84093	0.0277919	0.34396
Traf3	-0.980465	4.09013	4.83302	0.0279196	0.344758
Ankrd13c	1.0095	5.44035	4.82987	0.0279707	0.344993
Atxn7l1	1.78938	3.84087	4.81876	0.0281515	0.346425
Cxxc1	-1.04973	4.6388	4.81731	0.0281753	0.346425
Ddx27	0.830632	5.06695	4.81682	0.0281832	0.346425
Cxcl5	-5.55896	1.29657	4.81078	0.0282822	0.346457
Uqcrh	1.31595	10.1382	4.81159	0.0282689	0.346457
Fbxo11	-1.07443	4.84594	4.81186	0.0282646	0.346457
Mir22hg	-2.01669	3.2106	4.80459	0.028384	0.34731
Ptafr	-1.21214	5.09132	4.80104	0.0284426	0.347632
Pigyl	-3.08227	1.21776	4.79559	0.0285327	0.348338
Tceal8	2.04535	5.06703	4.79126	0.0286045	0.348473
2700097O09Rik	1.48204	5.28372	4.79103	0.0286084	0.348473
Taok3	1.66302	2.57501	4.78891	0.0286436	0.348508
Hormad2	-5.1905	1.1885	4.77967	0.0287977	0.349197
Tmem62	1.29279	4.12985	4.77775	0.0288298	0.349197
Rab10	0.993966	6.72861	4.77929	0.028804	0.349197
Hpcal1	-1.47024	3.57364	4.77996	0.0287928	0.349197
Pex3	1.68391	3.41832	4.74577	0.0293704	0.351492
Orc3	1.07199	5.25384	4.75973	0.0291331	0.351492
Gm32051	3.38673	9.86736	4.76185	0.0290973	0.351492
Slc10a3	1.55668	3.54535	4.75059	0.0292882	0.351492
Srgap2	-0.988365	4.30751	4.75656	0.0291869	0.351492
Maip1	-1.65315	2.84305	4.74547	0.0293755	0.351492
Tsg101	1.09545	6.44979	4.7533	0.0292421	0.351492
Sacm1l	0.808061	5.69473	4.75907	0.0291444	0.351492
Prkaca	2.32935	2.29196	4.74151	0.0294432	0.351492
A930002I21Rik	-5.28098	1.73121	4.75844	0.029155	0.351492
AW011738	1.99035	4.11496	4.75016	0.0292956	0.351492
Slc15a3	-1.3568	4.55065	4.74519	0.0293804	0.351492
Ccl27a	-3.81072	0.566485	4.74312	0.0294156	0.351492
Sbds	0.770812	5.52681	4.7393	0.0294811	0.351555
E2f6	-1.59429	2.97426	4.73388	0.0295741	0.352089
Atp6ap1	0.821015	7.47531	4.73288	0.0295913	0.352089
Fgfr1op2	1.47646	9.52971	4.73099	0.0296238	0.352089
Ftl1.ps2	2.15284	2.86535	4.72709	0.0296911	0.352137
Spast	0.763299	5.16231	4.72697	0.0296932	0.352137
Sestd1	-2.41356	2.15218	4.7232	0.0297583	0.352521
Etaa1	-1.14963	3.85808	4.72003	0.0298132	0.352784
Stim1	-0.885303	5.20324	4.70686	0.0300425	0.352787
Folr2	-5.81208	2.45197	4.71475	0.0299049	0.352787
Ubr4	1.11229	5.33753	4.70523	0.030071	0.352787
Chd3	0.951752	5.0912	4.70047	0.0301544	0.352787
Vps37a	1.06829	5.23835	4.70616	0.0300547	0.352787
Emc3	0.761038	6.12315	4.70517	0.030072	0.352787
Chmp1b	0.999036	6.28719	4.70955	0.0299954	0.352787
Polr3k	1.13324	4.92184	4.70415	0.0300899	0.352787
Clec4e	-1.11765	7.03993	4.70177	0.0301315	0.352787
Gm28609	2.82208	2.7782	4.71209	0.0299511	0.352787
Sdcbp	0.9846	9.47607	4.69939	0.0301734	0.352787
Gm42547	4.65952	1.30637	4.69159	0.0303106	0.35286
Lyrm2	-1.1352	4.01057	4.69407	0.0302668	0.35286
Nek7	0.992961	7.08017	4.69583	0.0302358	0.35286
Capn10	-1.78136	2.37959	4.69229	0.0302982	0.35286
Trdv4	-4.42937	1.07379	4.68681	0.030395	0.353461
Ccdc43	-1.19044	4.12225	4.67967	0.0305215	0.353474
Usp19	0.894523	5.5521	4.68201	0.0304801	0.353474
Rad9a	-1.52365	3.19674	4.67935	0.0305273	0.353474
Pde4d	2.38403	1.95825	4.68435	0.0304385	0.353474
Gfod2	3.07424	0.977803	4.67408	0.0306211	0.35385
Pomt1	-2.15594	2.40265	4.67384	0.0306255	0.35385
Med19	1.0941	4.14052	4.65111	0.0310335	0.354143
Erh	-0.920496	4.98331	4.66419	0.030798	0.354143
Usp6nl	1.09714	4.06718	4.67038	0.0306872	0.354143
Zfp444	2.84461	1.56394	4.65327	0.0309945	0.354143
Myo1b	-5.46185	0.825887	4.65852	0.0308997	0.354143
Abca13	5.29833	1.22587	4.65022	0.0310495	0.354143
Pex7	-1.05132	4.2636	4.65539	0.0309561	0.354143
Acoxl	4.7804	1.082	4.64866	0.0310779	0.354143
Lix1l	-3.86848	0.945851	4.65179	0.0310212	0.354143
Mboat7	-1.09704	4.84929	4.66867	0.0307177	0.354143
Tsn	0.661434	6.43699	4.65639	0.0309382	0.354143
Zbtb44	1.43008	6.83385	4.65197	0.031018	0.354143
Maoa	-5.69045	1.07789	4.66113	0.0308529	0.354143
Ccdc115	-1.16644	4.45239	4.64096	0.0312175	0.354346
Lyrm4	1.2818	3.17229	4.63914	0.0312507	0.354346
Pofut2	-1.57163	2.82113	4.63862	0.0312601	0.354346
Prss16	-5.11896	0.902861	4.63929	0.0312479	0.354346
Ikzf2	1.75563	2.64759	4.6433	0.0311751	0.354346
Gem	-1.61831	3.88514	4.62861	0.0314431	0.355311
Trappc2	-1.43927	4.27912	4.62856	0.031444	0.355311
Sh3d19	1.83708	3.94197	4.62924	0.0314315	0.355311
Stab1	-4.98931	1.81985	4.62105	0.031582	0.356496
Bicd1	5.00416	0.845285	4.61625	0.0316704	0.357121
Gm1976	3.88714	1.1992	4.61362	0.031719	0.357295
Cdc23	0.915934	4.72336	4.60055	0.0319617	0.357414
Rnf144b	-1.86451	3.20441	4.60134	0.0319471	0.357414
Ndufa4	0.940148	7.87838	4.60139	0.031946	0.357414
Pik3r1	0.796603	6.15936	4.60318	0.0319128	0.357414
Fam159b	2.07291	3.55311	4.60568	0.0318662	0.357414
Chchd2	0.904613	7.46098	4.61094	0.0317686	0.357414
Metap2	1.23992	8.72083	4.60092	0.0319549	0.357414
Btbd10	-0.957268	4.37166	4.59768	0.0320153	0.35752
Mthfd2l	-2.81582	2.32316	4.59649	0.0320375	0.35752
Gm41307	-5.06949	1.11755	4.57883	0.0323694	0.35927
Gm27477	-5.32576	1.327	4.58019	0.0323436	0.35927
Akap1	-5.46774	1.1007	4.58062	0.0323356	0.35927
Stk11	1.00462	6.00918	4.58415	0.032269	0.35927
Zc3hc1	-1.05778	4.36233	4.57751	0.0323943	0.35927
Abcg3	1.41644	5.13085	4.58535	0.0322464	0.35927
Thap12	0.85116	5.30967	4.57567	0.0324291	0.359287
Ccne1	-1.81402	3.30173	4.57315	0.0324769	0.359446
Mfge8	2.32206	2.10537	4.56621	0.0326087	0.359447
Ift43	4.42617	0.824114	4.56729	0.032588	0.359447
Cdkn1a	-2.85534	2.14308	4.56612	0.0326103	0.359447
Cep63	-1.02717	4.56434	4.56634	0.0326061	0.359447
Mxi1	1.64466	8.29994	4.55851	0.0327556	0.360312
Cdk5r1	-3.70384	0.837015	4.55959	0.0327348	0.360312
Casc3	0.970522	4.27215	4.54699	0.0329768	0.361822
Pip5k1b	1.94108	4.67299	4.54412	0.0330319	0.361822
Serpina3g	-1.10605	8.00421	4.53985	0.0331144	0.361822
Zfp354c	-4.69066	1.48722	4.54067	0.0330987	0.361822
Fcgr4	1.09812	8.03641	4.54246	0.0330641	0.361822
Arl2bp	1.00862	6.5443	4.54519	0.0330114	0.361822
Wdr26	1.59349	10.4955	4.53916	0.0331279	0.361822
Ccni	1.23319	8.01076	4.53627	0.0331839	0.362067
Tpt1	1.29778	12.0904	4.53264	0.0332542	0.362468
5830444B04Rik	-3.23552	1.51272	4.52154	0.0334707	0.363724
Oxnad1	1.7983	2.94841	4.5238	0.0334264	0.363724
Uvssa	-1.34785	3.55683	4.52202	0.0334613	0.363724
Atpif1	1.43051	8.91411	4.51427	0.0336132	0.364056
Taldo1	1.27112	10.384	4.48632	0.0341671	0.364056
Dtymk	-1.11051	4.72127	4.50126	0.0338699	0.364056
Phc1	-2.38415	2.61002	4.48878	0.0341181	0.364056
Ndufb6	1.11304	5.31986	4.50109	0.0338733	0.364056
Chrm3	-5.12781	1.4641	4.51769	0.0335462	0.364056
Tbc1d2b	0.809543	6.23768	4.51131	0.0336715	0.364056
Gm48529	-2.75277	1.77286	4.509	0.033717	0.364056
Igfbp7	-4.12167	2.74797	4.49075	0.0340788	0.364056
Trbv26	2.75244	2.04263	4.49893	0.0339161	0.364056
Brk1	0.704617	7.83348	4.4891	0.0341117	0.364056
1600020E01Rik	1.3249	7.09099	4.48417	0.0342101	0.364056
Il10rb	0.836259	5.58497	4.48698	0.034154	0.364056
Rangrf	-4.89368	1.03166	4.48138	0.034266	0.364056
Rbp1	5.29999	0.779664	4.49889	0.0339168	0.364056
af1	1.04128	7.49893	4.48661	0.0341613	0.364056
Hat1	-0.871004	5.40534	4.48982	0.0340974	0.364056
Fpr1	-1.16723	6.31785	4.48232	0.0342471	0.364056
Mns1	1.62199	3.52692	4.49762	0.033942	0.364056
Fra10ac1	-1.5957	3.04782	4.51213	0.0336554	0.364056
Mcoln3	-3.44257	1.78488	4.49957	0.0339034	0.364056
Prkaa2	-5.06868	1.06882	4.50943	0.0337085	0.364056
Mmel1	3.60493	2.12056	4.48079	0.034278	0.364056
G6pc3	-1.50233	3.33517	4.4729	0.0344365	0.365379
Gm45871	1.77987	3.73677	4.4661	0.0345738	0.365675
Ikbke	-0.859059	6.08515	4.46859	0.0345234	0.365675
Mbtps2	-1.7273	3.04987	4.46811	0.0345332	0.365675
2010007H06Rik	-4.71515	0.989043	4.4648	0.0346	0.365675
Gda	1.6883	12.3064	4.45422	0.0348151	0.367588
Kdm2b	-1.32893	3.21646	4.44869	0.0349279	0.368418
H2.Q7	-1.03323	7.78605	4.44341	0.0350363	0.368839
Ppm1d	0.953859	5.10429	4.44372	0.0350299	0.368839
Tpx2	1.04549	5.27488	4.43307	0.035249	0.369973
Rpl38.ps2	1.17761	5.64656	4.43151	0.0352813	0.369973
Paqr7	1.32743	3.96927	4.43267	0.0352574	0.369973
Recql	-1.15211	4.55871	4.43285	0.0352536	0.369973
Rtl6	-1.60282	2.70676	4.42952	0.0353224	0.370044
Gm30948	2.95676	1.88735	4.42747	0.0353648	0.370129
Gm11808	1.55164	4.74478	4.42129	0.0354933	0.370764
Trio	-2.69768	1.89715	4.42124	0.0354943	0.370764
Hscb	1.72458	8.21511	4.41792	0.0355634	0.370767
Hsp90ab1	0.833334	7.84283	4.41861	0.0355489	0.370767
Tmem50a	0.860836	7.87518	4.40416	0.0358513	0.371088
Psmd8	0.835935	8.03875	4.40338	0.0358677	0.371088
Gm20324	-4.68375	1.13719	4.39654	0.0360119	0.371088
Btf3l4	1.01075	3.79297	4.39433	0.0360585	0.371088
Sh2b2	-2.13531	2.04044	4.41299	0.0356663	0.371088
Myl6	1.14721	11.8554	4.39897	0.0359607	0.371088
Cep126	-5.22382	1.81985	4.39916	0.0359566	0.371088
Lypla1	-1.12128	4.44976	4.41212	0.0356845	0.371088
Slc35g1	-1.88638	2.94814	4.39351	0.0360761	0.371088
Fundc2	1.65011	8.93337	4.3937	0.0360719	0.371088
Pole	-2.07408	2.87742	4.40757	0.0357797	0.371088
Polr2e	-1.30779	3.73606	4.39669	0.0360087	0.371088
Snx22	2.8771	3.98102	4.39445	0.0360562	0.371088
Rb1	1.12344	6.91173	4.39558	0.0360321	0.371088
Hsh2d	-1.25357	4.99407	4.38872	0.0361775	0.371424
Zfp512	1.44814	3.7418	4.38871	0.0361777	0.371424
Hopxos	-5.57414	0.731197	4.38655	0.0362236	0.371541
Zfp335os	2.96597	1.42843	4.36908	0.0365967	0.372293
Ercc6	-1.22655	3.8702	4.37448	0.036481	0.372293
Ehd3	0.863199	4.54294	4.37256	0.036522	0.372293
Igkv14.111	3.16784	1.23566	4.36701	0.0366413	0.372293
Pole3	1.06397	4.50275	4.36831	0.0366133	0.372293
Carm1	1.57579	2.77264	4.36697	0.0366422	0.372293
Tpt1.ps3	1.20712	6.19522	4.36932	0.0365916	0.372293
Rfk	1.75931	9.31795	4.37465	0.0364773	0.372293
Tpm3	-0.704639	7.41424	4.37129	0.0365493	0.372293
Alg13	2.2973	2.09255	4.37721	0.0364226	0.372293
Pqlc1	0.948553	4.97315	4.36331	0.0367209	0.372742
Zfp664	-1.15675	4.96255	4.36073	0.0367766	0.372956
Dut	-1.0378	5.73581	4.35163	0.0369735	0.37324
Mmaa	2.01547	2.67481	4.35349	0.0369332	0.37324
Gtf2h5	1.07286	5.35127	4.35144	0.0369778	0.37324
Fis1	1.45472	7.31502	4.35454	0.0369105	0.37324
Hist1h2bp	3.01336	1.39223	4.35709	0.0368551	0.37324
po4	0.938919	4.25825	4.34819	0.0370484	0.373398
Ighv1.39	-3.00337	1.02398	4.34753	0.0370626	0.373398
Gnas	1.59115	11.9685	4.34352	0.03715	0.373579
Mrpl35	-1.20889	4.40357	4.34384	0.0371431	0.373579
Sardh	-3.79623	3.42116	4.33705	0.0372915	0.374652
Trp53inp2	-2.93514	2.25865	4.3186	0.0376978	0.375617
Siah2	-1.76834	3.41818	4.32007	0.0376654	0.375617
Rnmt	0.970666	5.61268	4.32188	0.0376253	0.375617
Rsad2	2.19951	13.2203	4.32051	0.0376556	0.375617
Tmem245	1.09303	4.39462	4.31122	0.0378618	0.375617
Smim24	-2.83255	1.88831	4.31166	0.0378519	0.375617
Pla2g12a	1.40186	5.94223	4.31528	0.0377716	0.375617
Supt5	-0.978327	4.78568	4.31168	0.0378515	0.375617
Gm16536	1.71857	2.99187	4.31075	0.0378722	0.375617
Trim37	1.00307	5.15929	4.32669	0.0375191	0.375617
Zfand5	0.876486	6.69597	4.31061	0.0378753	0.375617
D130040H23Rik	-2.47037	1.92982	4.32268	0.0376076	0.375617
Recql5	-1.02485	4.38835	4.32683	0.037516	0.375617
Ubr2	0.897514	4.65933	4.31569	0.0377624	0.375617
Casp12	-4.85949	1.91014	4.29469	0.0382316	0.378802
Myc	-2.06553	2.60309	4.28637	0.0384192	0.379266
Ncoa4	1.80311	10.0398	4.28773	0.0383885	0.379266
Mtg1	-2.1168	2.77836	4.28901	0.0383594	0.379266
Cmpk2	1.06343	7.02663	4.28669	0.0384119	0.379266
H3f3a.ps1	1.64979	5.1337	4.28326	0.0384895	0.379613
Kctd20	0.837987	7.44837	4.2793	0.0385792	0.379803
Atp6v1d	0.787276	6.9655	4.2801	0.038561	0.379803
Fanci	-2.26286	3.03592	4.27716	0.0386278	0.379934
Rab9	1.13457	3.93661	4.27537	0.0386686	0.379988
Zfas1	1.01849	5.99443	4.2719	0.0387475	0.380071
Dnajc8	0.775435	7.194	4.27322	0.0387174	0.380071
Gadd45b	-1.5069	3.90028	4.26066	0.0390047	0.380383
Armcx1	-4.62011	1.64699	4.25457	0.0391449	0.380383
Chchd10	1.83543	4.78294	4.22792	0.0397641	0.380383
Ddx18	-1.42083	3.45999	4.23465	0.0396068	0.380383
Mast3	-1.26224	3.82923	4.24045	0.0394716	0.380383
Chpf	-2.02879	1.85782	4.25042	0.0392407	0.380383
Borcs8	1.1379	4.56399	4.25058	0.0392369	0.380383
Mapk3	0.863103	4.84607	4.23506	0.0395973	0.380383
Ube2b	1.69659	10.4483	4.26055	0.0390074	0.380383
Fpgs	-2.50969	1.38367	4.25634	0.0391041	0.380383
Slc22a15	2.07829	2.60859	4.22488	0.0398354	0.380383
Itpa.ps1	3.08821	1.40423	4.22621	0.0398043	0.380383
Fut11	1.07752	3.65124	4.24086	0.0394621	0.380383
Sap30l	-1.30449	3.61531	4.23463	0.0396072	0.380383
Pex19	0.86483	5.73234	4.26009	0.0390178	0.380383
Ppif	-1.43304	3.73462	4.25263	0.0391897	0.380383
Prr5l	1.04763	4.7019	4.25025	0.0392446	0.380383
Rbmx2	-1.8455	2.46492	4.23956	0.0394923	0.380383
Gtf2f2	-0.905177	4.36258	4.23574	0.0395814	0.380383
Hsdl1	0.856487	5.2453	4.22611	0.0398067	0.380383
Ighmbp2	2.16595	1.67861	4.26539	0.0388964	0.380383
Rnf5	1.86421	2.72559	4.2527	0.039188	0.380383
Tnfrsf25	2.24836	1.77201	4.25947	0.039032	0.380383
Pym1	-1.10738	4.96959	4.22949	0.0397274	0.380383
Lhfp	-2.16699	3.16315	4.24774	0.0393026	0.380383
Rint1	1.3817	3.39769	4.22477	0.0398379	0.380383
Sub1	0.767957	8.7262	4.25733	0.0390812	0.380383
1810006J02Rik	2.93578	1.42375	4.23128	0.0396854	0.380383
Tppp	-2.13143	3.3449	4.23999	0.0394823	0.380383
Nit1	-1.00724	4.40873	4.23074	0.0396982	0.380383
Ddb1	0.709088	8.05707	4.21725	0.040015	0.381736
Pigq	1.19157	6.49017	4.21281	0.0401198	0.38206
Phkg2	-0.79226	5.00436	4.21314	0.040112	0.38206
Ndufa2	0.909284	6.18463	4.21119	0.0401582	0.382088
Ruvbl1	-1.02118	4.67987	4.2064	0.0402718	0.382831
Pias3	-1.94528	2.54103	4.20163	0.0403851	0.382921
Gm29264	-5.06273	0.381708	4.20152	0.0403878	0.382921
Cma1	-1.81763	5.02114	4.20251	0.0403642	0.382921
Smarcal1	-1.01737	3.71119	4.19666	0.0405037	0.383335
Arl6ip1	0.662107	8.12485	4.19521	0.0405382	0.383335
Klra17	-2.38218	3.16338	4.19689	0.0404983	0.383335
Tuba4a	1.50689	9.41948	4.18944	0.0406765	0.383431
Arhgap23	-2.07973	1.82595	4.1904	0.0406536	0.383431
Mzt1	1.09615	5.43719	4.19127	0.0406326	0.383431
Rpl41	1.40691	11.2923	4.18885	0.0406907	0.383431
Rbm4b	-1.71837	3.13942	4.18643	0.0407489	0.383608
Bst1	-1.42909	5.92195	4.18511	0.0407805	0.383608
Gm9949	1.39289	3.65349	4.1777	0.0409592	0.38475
Carns1	-2.46281	2.92693	4.17712	0.0409733	0.38475
Ncor1	0.724505	6.4714	4.16059	0.0413751	0.384947
Nfkb2	-1.01534	4.78163	4.15922	0.0414086	0.384947
Mmp8	-1.49281	8.32599	4.16736	0.04121	0.384947
Tecpr1	-0.903495	5.01273	4.15863	0.0414229	0.384947
Ndufa3	1.21261	7.73776	4.16319	0.0413116	0.384947
Cyp4b1.ps2	2.47501	7.38823	4.16673	0.0412254	0.384947
Zbtb8os	1.29032	3.86291	4.17417	0.0410446	0.384947
Cdc20b	-3.96626	0.719078	4.16558	0.0412534	0.384947
Oaf	-5.41617	1.83566	4.16442	0.0412815	0.384947
Glul	1.32203	9.34887	4.16184	0.0413444	0.384947
Klhl12	1.02118	5.50986	4.16455	0.0412784	0.384947
Khdc1b	-5.11936	0.822052	4.1617	0.0413479	0.384947
Idi1	-2.35411	1.89895	4.15565	0.0414959	0.385242
Cdh1	2.60812	1.31876	4.15442	0.0415261	0.385242
Ncoa7	1.50897	6.75868	4.14686	0.0417119	0.385308
Grn	1.73097	2.85488	4.15147	0.0415983	0.385308
Btbd11	-2.71366	2.14155	4.14778	0.0416892	0.385308
Tulp3	-4.79231	1.03302	4.14721	0.0417031	0.385308
Sipa1l2	-1.73719	2.37125	4.14742	0.041698	0.385308
Gprasp1	1.31601	4.21642	4.13584	0.0419843	0.385987
1200007C13Rik	-4.85711	1.23233	4.13509	0.0420028	0.385987
Ell2	1.70985	6.22831	4.14038	0.0418717	0.385987
Sh3glb1	1.72975	11.8393	4.13557	0.0419908	0.385987
Tnrc6b	1.03142	5.48272	4.13375	0.0420361	0.385987
Ier3	-2.42761	2.18046	4.1384	0.0419207	0.385987
N4bp3	-2.08863	2.11761	4.14111	0.0418538	0.385987
Impact	-1.05641	3.83371	4.13116	0.0421005	0.386249
Tex14	-3.00213	1.38068	4.12898	0.0421547	0.386418
Tbc1d9b	-1.46526	3.2928	4.12529	0.0422468	0.386563
Slc2a6	-1.04299	5.54278	4.1124	0.04257	0.386563
Rhob	-2.06266	2.45976	4.11424	0.0425237	0.386563
Zfp429	-0.898607	4.51959	4.11691	0.0424566	0.386563
Nrbf2	-1.87003	2.39736	4.1131	0.0425522	0.386563
Narfl	-1.11435	3.93073	4.11279	0.04256	0.386563
Nfib	-5.6533	2.1109	4.1193	0.0423967	0.386563
Cycs	0.805062	6.3478	4.10997	0.0426311	0.386563
Ruvbl2	-1.47446	3.34571	4.12504	0.0422529	0.386563
Gprc5b	-5.06443	1.41952	4.12351	0.0422911	0.386563
Slc26a6	-2.02225	2.29615	4.10833	0.0426725	0.386563
Trp53i13	-3.09373	1.3069	4.10921	0.0426503	0.386563
Atp5f1	0.753955	8.13981	4.11162	0.0425897	0.386563
Ighv1.22	-2.68233	1.53359	4.11488	0.0425075	0.386563
Nt5c	-0.918869	5.14113	4.10689	0.0427088	0.386566
Cdk2ap1	-0.93932	4.21316	4.10443	0.042771	0.38665
Hdgf	0.917272	5.4353	4.10227	0.0428256	0.38665
Jpt1	1.01941	8.17243	4.10235	0.0428237	0.38665
4632432E15Rik	7.40349	1.68728	4.10053	0.0428698	0.386725
Ska2	-1.90953	3.36619	4.09904	0.0429076	0.386742
Usmg5	1.04396	7.18561	4.0968	0.0429643	0.38693
Gm35657	-5.07911	1.1052	4.09471	0.0430176	0.387086
Hp	-1.30362	8.56972	4.09308	0.0430591	0.387137
Akt2	0.786146	7.20229	4.08685	0.0432182	0.388188
Lrrc28	1.27974	4.40267	4.08568	0.043248	0.388188
Mrgprb1	-6.21477	0.566616	4.0827	0.0433243	0.388235
Gm33370	2.75904	3.73759	4.08266	0.0433253	0.388235
B4galt6	-2.42032	2.08518	4.0774	0.0434605	0.388478
Ralbp1	1.00994	7.47895	4.07941	0.0434087	0.388478
Tubb3	2.15844	2.86515	4.07814	0.0434414	0.388478
BC003331	0.891069	4.76122	4.07594	0.0434982	0.388492
Mpc2	1.45263	8.39828	4.06639	0.0437447	0.390371
Ndufb2	1.44726	2.43468	4.06484	0.043785	0.390407
Usp15	1.57092	10.604	4.03003	0.044697	0.390422
Gapvd1	0.970122	7.12148	4.03871	0.0444679	0.390422
Gemin7	0.819457	5.08505	4.02749	0.0447645	0.390422
Lage3	0.904074	4.49583	4.05452	0.0440531	0.390422
Fbxo9	1.80828	9.6669	4.02866	0.0447334	0.390422
Gzmm	-2.22794	2.60627	4.04712	0.0442467	0.390422
Scrn3	1.44171	4.38914	4.04031	0.0444258	0.390422
Tmem199	-1.29179	3.76959	4.04701	0.0442496	0.390422
Snap23	1.09257	7.86257	4.0304	0.0446874	0.390422
Gemin5	-1.43225	4.10073	4.04916	0.0441932	0.390422
Ccdc51	-1.64827	2.69205	4.04519	0.0442975	0.390422
Sema4b	1.24168	3.33426	4.05017	0.044167	0.390422
Snrnp27	0.913287	5.91052	4.0342	0.0445867	0.390422
Spns1	-1.85417	2.55524	4.03777	0.0444926	0.390422
Supv3l1	-1.12892	3.65328	4.04972	0.0441786	0.390422
Gm30211	2.31645	2.20577	4.03335	0.0446094	0.390422
Nqo1	1.94258	4.20919	4.04683	0.0442544	0.390422
Ankrd13d	-2.84444	1.31317	4.03875	0.0444669	0.390422
Faap24	-2.49131	1.53086	4.02929	0.0447167	0.390422
Phf23	-0.740422	5.38779	4.05066	0.0441541	0.390422
Zfyve19	-1.39685	3.58332	4.03237	0.0446352	0.390422
Ap2b1	0.756683	6.69867	4.02776	0.0447575	0.390422
Siglec1	5.04031	1.2605	4.05196	0.0441202	0.390422
Mvk	-1.86784	2.03669	4.03821	0.0444809	0.390422
Ipo13	-2.4233	1.88194	4.02751	0.044764	0.390422
Cyb5rl	-1.94047	2.09622	4.05825	0.0439561	0.390422
Usp32	1.4993	7.81781	4.03784	0.0444908	0.390422
Ccdc97	-2.71954	1.62883	4.02405	0.0448559	0.390587
Mmp9	-1.17347	6.31527	4.02415	0.0448531	0.390587
Ddc	2.70742	1.29847	4.01751	0.0450302	0.391568
Cd36	1.5884	8.65383	4.01709	0.0450412	0.391568
Cyb5a	0.917632	8.24356	4.01272	0.0451583	0.391897
4933439C10Rik	1.91144	1.80412	4.01012	0.0452279	0.391897
Slc36a4	1.68942	3.48146	4.00691	0.0453141	0.391897
Gm46430	1.23851	3.78074	4.00458	0.0453769	0.391897
Nmnat3	1.45903	2.29864	4.01419	0.045119	0.391897
Fam26f	-1.33691	4.46511	4.00349	0.0454062	0.391897
Tor1b	-0.756872	5.18287	4.00972	0.0452387	0.391897
Acot2	-1.71103	2.88039	4.00443	0.0453807	0.391897
Gzma	-1.23562	9.50551	4.00426	0.0453853	0.391897
Rapgef1	-1.12346	4.4973	3.99607	0.0456065	0.392056
Smc3	-0.789003	6.09751	3.99972	0.0455079	0.392056
Ttc17	0.862707	4.22393	3.99931	0.0455189	0.392056
Il1rn	-1.50004	5.46637	3.99639	0.0455977	0.392056
Lrrc8d	0.814793	3.87071	3.99775	0.045561	0.392056
2210016F16Rik	-1.08994	4.96292	3.99184	0.0457212	0.392729
Svil	0.889503	5.18759	3.98897	0.0457991	0.393085
Grcc10	2.19718	1.67564	3.98679	0.0458584	0.39328
Ptbp3	0.745643	8.17758	3.98396	0.0459355	0.393628
Pcmtd1	0.900279	6.28446	3.97664	0.0461355	0.394089
Tcim	-5.096	1.03997	3.9775	0.0461119	0.394089
Ube2f	1.52836	7.0452	3.97989	0.0460466	0.394089
Prdx5	-0.928932	7.98688	3.97774	0.0461054	0.394089
Trac	-0.999684	6.08783	3.97104	0.0462892	0.395089
9330159M07Rik	2.15679	2.09822	3.96954	0.0463306	0.395129
Ypel5	1.36842	8.83376	3.96575	0.0464347	0.395705
Gm4070	1.41486	6.51836	3.96383	0.0464878	0.395815
Iqsec1	0.987367	4.22137	3.96262	0.0465211	0.395815
Vopp1	1.66544	9.29522	3.9573	0.0466684	0.396443
Suco	0.859911	5.51791	3.95767	0.0466582	0.396443
Alas1	-1.35048	4.76453	3.95099	0.0468437	0.396757
Arpc3	0.687834	7.79256	3.94699	0.0469552	0.396757
Zfp932	-1.41618	3.87839	3.94511	0.0470078	0.396757
Rasgef1b	-1.3923	3.18553	3.94408	0.0470367	0.396757
Osbpl8	0.93198	6.98289	3.94919	0.0468939	0.396757
Iah1	-0.840983	5.13682	3.95081	0.0468489	0.396757
Spata1	-2.17661	2.12758	3.94635	0.0469731	0.396757
Steap4	-1.83929	3.29358	3.94856	0.0469114	0.396757
Ube2m	1.30896	6.829	3.94855	0.0469119	0.396757
Cyb5r4	0.723426	7.07065	3.94201	0.0470944	0.396933
Ppox	1.13165	4.88653	3.9389	0.0471815	0.397047
Erbb3	1.99476	2.51017	3.93907	0.0471768	0.397047
Ypel3	1.40079	7.84723	3.93341	0.0473359	0.397724
Rnf219	1.96879	2.76636	3.93353	0.0473325	0.397724
Gm1821	1.41548	4.26896	3.93072	0.0474117	0.397889
Nt5c3b	-1.20267	4.60883	3.93009	0.0474293	0.397889
Tmem248	0.757385	5.0679	3.92769	0.0474973	0.39815
Tbc1d25	-2.9124	0.986642	3.92402	0.0476008	0.398708
Cdk14	2.25875	1.72225	3.91977	0.0477213	0.398863
Kcna2	2.88331	1.53979	3.91906	0.0477414	0.398863
Fmnl1	1.26022	3.03121	3.91815	0.0477673	0.398863
Inf2	-1.86815	3.58471	3.92169	0.047667	0.398863
Acss1	0.807289	5.85151	3.91596	0.0478296	0.399074
Gm16793	1.78627	3.85047	3.91252	0.0479277	0.399583
Ulk3	-2.75379	1.44911	3.90941	0.0480165	0.399705
Crtap	-1.28783	3.2458	3.90995	0.0480012	0.399705
Gm37254	2.07637	1.98076	3.90042	0.0482739	0.400581
Nlrc4	-1.10382	3.8091	3.90326	0.0481924	0.400581
Eif1	1.18138	8.26932	3.9001	0.0482834	0.400581
Ptpn1	-0.778698	5.89796	3.90112	0.0482538	0.400581
Smim19	-2.48851	2.25509	3.89911	0.0483118	0.400581
Lsm7	0.994645	3.81826	3.89796	0.0483447	0.400581
Irf2	2.39906	2.17239	3.88894	0.0486051	0.402429
Pkn2	1.42798	8.25039	3.88677	0.0486681	0.402641
Phf1	1.15474	3.84263	3.8792	0.0488879	0.403531
Spryd7	1.30052	3.34156	3.88122	0.0488292	0.403531
Napa	1.09343	7.00513	3.87991	0.0488671	0.403531
2009-03-01	-3.39888	1.23874	3.87046	0.0491431	0.403797
Heca	0.854067	6.34803	3.86784	0.0492197	0.403797
Gm15326	-3.09219	1.12382	3.86908	0.0491834	0.403797
Vsig10	-2.62785	1.32281	3.86855	0.0491991	0.403797
Mgll	1.63471	4.40055	3.87362	0.0490506	0.403797
Snx25	-0.721783	5.06968	3.86879	0.049192	0.403797
Ube2n	0.805785	5.35508	3.87064	0.0491377	0.403797
Trem3	-1.26069	5.2725	3.87086	0.0491313	0.403797
Pttg1	1.67017	9.60103	3.86545	0.0492899	0.404065
Tmc8	1.87092	2.11646	3.86244	0.0493784	0.404175
Sp3os	1.75844	2.90595	3.86335	0.0493518	0.404175
Wnk1	0.932344	7.69119	3.86059	0.049433	0.404315
Cox15	-1.1663	3.51887	3.85565	0.0495787	0.404856
Cdk5rap1	1.69014	3.40088	3.8561	0.0495654	0.404856
Efl1	-1.0969	3.72348	3.85453	0.0496117	0.404856
Smim7	0.795623	6.9153	3.85162	0.049698	0.404946
Cd24a	1.81569	12.2501	3.85243	0.0496739	0.404946
Bambi	2.47829	0.842144	3.84937	0.0497646	0.404954
Glo1	1.66312	8.5345	3.84905	0.049774	0.404954
Pafah2	-2.55681	2.67671	3.84565	0.0498752	0.405166
Mtfmt	-1.21456	3.34017	3.8458	0.0498706	0.405166
Tns3	-1.60936	2.74889	3.84288	0.0499577	0.405225
Vangl1	1.71696	4.86104	3.8437	0.0499332	0.405225
Orai3	-0.868374	5.07132	3.83942	0.0500609	0.405452
Gtdc1	0.925321	4.37629	3.84043	0.0500307	0.405452
1810022K09Rik	0.887679	5.21504	3.83367	0.0502327	0.406538
Fbxo21	-1.87184	2.7585	3.83163	0.0502939	0.406728
Phf3	0.674524	6.26542	3.82685	0.0504376	0.40701
Vdac1	-0.863134	5.4708	3.82914	0.0503687	0.40701
Snrpd1	-0.861125	5.19613	3.82545	0.0504797	0.40701
Brpf1	-0.705672	4.85586	3.82545	0.0504798	0.40701
Ndufa13	0.954746	7.14312	3.82159	0.0505961	0.407643
Tcrg.C2	2.0525	2.92873	3.81657	0.0507479	0.408561
AI506816	-1.10709	4.20226	3.8102	0.0509414	0.409202
Trbv3	-1.32091	3.91137	3.81233	0.0508767	0.409202
Hs3st3b1	-2.32857	2.03744	3.8111	0.050914	0.409202
Tmem65	1.13323	3.93257	3.80382	0.0511357	0.410234
Cep57l1	-1.76019	3.117	3.80348	0.0511461	0.410234
Ccs	1.24317	5.56371	3.79963	0.0512639	0.410874
Psmc4	0.827315	4.54201	3.79038	0.051548	0.412537
Irgq	-1.71928	2.90729	3.7908	0.0515351	0.412537
Mipep	1.28348	3.22373	3.78563	0.0516946	0.412791
Lcn2	-1.84037	6.40416	3.7858	0.0516893	0.412791
Oma1	-0.920814	4.03409	3.78585	0.0516878	0.412791
Smoc1	-5.46564	1.00045	3.7828	0.0517819	0.412826
Ccdc32	-1.04272	4.00278	3.78177	0.0518139	0.412826
Palm	-2.44161	1.13843	3.78317	0.0517705	0.412826
Mks1	2.23945	1.62831	3.78017	0.0518633	0.412915
Spon1	-2.79579	2.5832	3.76615	0.0522998	0.413263
Ado	-1.02981	3.74496	3.76246	0.0524153	0.413263
Upf1	-1.31031	3.49991	3.76018	0.0524869	0.413263
Actr10	0.616065	6.47507	3.75738	0.0525747	0.413263
Srrt	0.841679	5.0258	3.76091	0.0524639	0.413263
Mrps14	0.748499	5.4908	3.76201	0.0524294	0.413263
Atraid	0.917592	4.9444	3.75595	0.05262	0.413263
Armcx6	-4.38927	1.90397	3.75602	0.0526178	0.413263
Upb1	2.52532	2.32142	3.77203	0.0521164	0.413263
Ap3s1	0.96892	6.13259	3.77526	0.0520159	0.413263
Agrn	1.95886	2.83732	3.77233	0.0521071	0.413263
Bloc1s5	1.18869	3.21655	3.76787	0.0522461	0.413263
Tmem185b	-1.08885	3.74944	3.76544	0.0523219	0.413263
Zfp408	-2.90009	1.77	3.76554	0.052319	0.413263
Arhgap29	2.21786	3.01148	3.77074	0.0521566	0.413263
Higd1a	-1.24125	4.85463	3.76666	0.0522839	0.413263
Smap1	1.49074	9.10076	3.75546	0.0526354	0.413263
Lmbr1	-3.446	0.953354	3.76019	0.0524867	0.413263
Igf1	6.71461	3.64573	3.7603	0.052483	0.413263
2008-03-01	1.47102	7.78342	3.75332	0.0527028	0.413491
Fam98b	-2.60275	1.75131	3.75198	0.0527451	0.413522
Piwil2	-4.80284	1.05196	3.75017	0.052802	0.413667
Med10	-0.771796	4.53193	3.74185	0.0530656	0.41543
Gstp1	1.07792	5.52253	3.7396	0.053137	0.415687
Selenow	1.76512	2.10616	3.73673	0.0532284	0.415799
Gm18853	1.65077	3.54057	3.73777	0.0531953	0.415799
Fam126a	1.40957	7.70719	3.73392	0.053318	0.416197
Cpsf6	0.607372	5.4468	3.7327	0.053357	0.4162
Crebrf	0.731507	6.24425	3.7292	0.0534692	0.416773
Ubxn2b	1.39574	3.4482	3.72574	0.0535797	0.417032
Nt5c3	1.75211	10.8424	3.72604	0.0535701	0.417032
Alad	1.20994	4.96422	3.72269	0.0536777	0.417273
Ccdc93	-0.78259	4.7437	3.72237	0.053688	0.417273
Rnf145	0.659138	6.35456	3.72011	0.0537609	0.417538
Eef1e1	-1.22766	3.42874	3.71887	0.0538007	0.417546
Zfp472	-1.11283	4.33274	3.71572	0.0539025	0.418035
Cul3	0.638607	7.12716	3.71265	0.0540016	0.418503
Limk1	-1.77836	1.99483	3.70983	0.0540928	0.418908
Fadd	-4.4277	1.14108	3.7022	0.0543407	0.419923
Gm20069	-2.47085	1.71451	3.70353	0.0542976	0.419923
Gm16587	4.67543	0.815674	3.70289	0.0543183	0.419923
Ggcx	2.14173	1.94163	3.69913	0.054441	0.420018
Adipor1	1.54285	12.2473	3.7003	0.0544026	0.420018
Parg	-0.700196	5.24663	3.69824	0.0544699	0.420018
Agtrap	-0.858073	5.14572	3.68846	0.0547901	0.420465
Yipf4	1.71926	8.91537	3.68921	0.0547655	0.420465
Prkd3	-0.777607	6.38671	3.68083	0.0550416	0.420465
Ftl1.ps1	1.50964	4.35186	3.68019	0.0550625	0.420465
Cope	0.950927	5.96847	3.68546	0.054889	0.420465
Wrn	-0.79211	4.81886	3.68372	0.054946	0.420465
Map2k4	-0.68386	5.23661	3.67867	0.0551129	0.420465
Tbk1	-0.657975	5.68208	3.68205	0.0550012	0.420465
Pcbd2	1.18912	3.36129	3.67974	0.0550774	0.420465
Ptpa	1.08862	5.95946	3.69014	0.0547349	0.420465
Sema7a	2.08642	2.64459	3.68796	0.0548067	0.420465
Tesk2	2.46342	1.96182	3.69236	0.0546622	0.420465
Ak3	-0.817127	5.54817	3.69094	0.0547088	0.420465
Sec61b	0.733517	5.99172	3.68635	0.0548595	0.420465
Cdan1	1.52033	3.50819	3.67971	0.0550783	0.420465
Trub1	1.4998	2.88489	3.67081	0.0553731	0.420798
Cdh17	-1.99578	2.43178	3.67028	0.0553908	0.420798
Rpl36a	0.888565	8.23045	3.67131	0.0553565	0.420798
Mettl3	-0.810117	4.75028	3.67162	0.0553463	0.420798
Fbxo3	0.674871	5.91989	3.67498	0.0552349	0.420798
Rab5a	0.937285	5.84984	3.67059	0.0553806	0.420798
Fig4	0.795153	5.79207	3.66074	0.0557088	0.420904
Rnf123	1.41	6.16573	3.6655	0.05555	0.420904
Gbp5	-1.71293	5.71325	3.66584	0.0555385	0.420904
Gm2a	0.685129	7.08358	3.66083	0.055706	0.420904
Gm19261	-3.16966	1.7033	3.66497	0.0555676	0.420904
Maob	5.47313	1.66799	3.6605	0.055717	0.420904
Rtp4	1.05357	6.63459	3.66262	0.055646	0.420904
Snx18	-0.870564	5.34635	3.66651	0.0555162	0.420904
Taco1	1.45728	2.68678	3.65685	0.0558392	0.420963
Rnf19a	0.832695	5.25605	3.65773	0.0558096	0.420963
Fan1	3.76073	0.759495	3.65676	0.0558421	0.420963
Slc38a5	2.21529	5.10191	3.64462	0.0562507	0.421029
Rev3l	1.1846	4.94583	3.64262	0.0563181	0.421029
Hnrnpd	0.91902	4.73255	3.6427	0.0563155	0.421029
Pink1	1.36741	9.15354	3.64281	0.0563119	0.421029
Zc3h6	-2.38712	1.66913	3.64516	0.0562324	0.421029
Arcn1	-0.578427	6.96255	3.64505	0.0562362	0.421029
Pld3	1.08607	4.78006	3.65212	0.0559978	0.421029
Srpk1	-0.703337	6.10844	3.65476	0.0559093	0.421029
Rad54b	-3.79685	1.16598	3.64258	0.0563195	0.421029
Mrpl19	-0.818829	4.6081	3.64943	0.0560884	0.421029
Dhx32	1.41042	3.61223	3.64266	0.0563169	0.421029
Pds5b	-0.8801	5.10709	3.64806	0.0561346	0.421029
Gm48161	2.89713	2.58601	3.63997	0.0564081	0.42131
Asb1	1.64601	9.17831	3.63743	0.056494	0.42131
Hnrnpul2	-0.651776	5.75583	3.63686	0.0565134	0.42131
Tbc1d19	-4.31956	1.56284	3.63783	0.0564806	0.42131
Cops3	-0.84337	5.62845	3.63293	0.056647	0.421727
Usp37	-0.906044	4.15444	3.63175	0.0566871	0.421727
Gm340	1.90289	2.58119	3.63076	0.0567209	0.421727
Gpcpd1	1.00094	8.29643	3.63062	0.0567258	0.421727
Coq6	-1.30024	3.48472	3.62451	0.0569342	0.421893
Polr3c	0.881033	4.58646	3.62792	0.0568179	0.421893
Vezf1	-0.777041	5.13787	3.62309	0.056983	0.421893
Tmem158	-4.4091	2.56368	3.62485	0.0569226	0.421893
Syngr1	2.07878	5.17936	3.62391	0.056955	0.421893
Tmsb10	-0.799035	7.09494	3.62742	0.056835	0.421893
Fas	-0.897466	5.37465	3.61998	0.0570897	0.422393
Sik3	-1.28869	3.7596	3.61562	0.0572394	0.42321
Gss	1.74963	5.4997	3.60494	0.0576082	0.425511
Phf8	1.05487	5.16872	3.60319	0.0576689	0.425511
Syvn1	-1.73707	2.26417	3.60406	0.0576387	0.425511
Adssl1	0.891495	4.71442	3.60013	0.057775	0.425711
Epcam	2.75741	1.66988	3.60104	0.0577434	0.425711
Qsox2	2.08401	2.59251	3.59574	0.0579278	0.426253
Hhex	-1.60737	3.58552	3.5962	0.0579119	0.426253
Baz2a	0.856442	4.42413	3.55646	0.0593142	0.426525
Rnf11	1.65461	10.3418	3.58821	0.0581909	0.426525
Rasal1	-2.20006	1.30539	3.5729	0.0587297	0.426525
Orc4	0.80685	5.57596	3.58215	0.0584035	0.426525
Gmpr2	-1.22268	4.06509	3.56263	0.0590941	0.426525
Mpc1	-0.901255	4.814	3.56838	0.0588899	0.426525
Med30	-0.912712	4.53586	3.5723	0.058751	0.426525
Eif3k	0.883017	8.9079	3.56793	0.0589056	0.426525
Araf	-0.752088	4.71225	3.56549	0.0589923	0.426525
Eipr1	0.893051	6.5271	3.57369	0.0587018	0.426525
Hyou1	1.01285	4.21557	3.569	0.0588679	0.426525
Kpna1	0.912539	6.80292	3.58345	0.058358	0.426525
Ccdc91	1.21369	3.2537	3.58077	0.0584521	0.426525
Mkln1	0.629351	6.01574	3.55825	0.0592504	0.426525
Ksr1	-2.25356	1.39433	3.58362	0.058352	0.426525
Acrbp	-2.64955	1.34344	3.56567	0.0589858	0.426525
Gm10221	1.40971	2.56984	3.56028	0.0591778	0.426525
Haus3	1.02002	4.60066	3.55969	0.0591989	0.426525
Rfesd	1.48208	5.59805	3.56345	0.059065	0.426525
2005-03-01	1.49197	9.18358	3.55547	0.0593494	0.426525
Hp1bp3	-0.6662	6.90817	3.58666	0.0582452	0.426525
Dync2h1	2.23143	1.88051	3.58574	0.0582776	0.426525
Mtfr1	1.36738	4.60985	3.55572	0.0593405	0.426525
Usp46	1.20095	4.18653	3.55791	0.0592623	0.426525
Gm13340	1.28777	3.29198	3.59015	0.058123	0.426525
Usp20	-1.53378	2.32823	3.56638	0.0589606	0.426525
Wdr18	-1.27362	4.10148	3.55777	0.0592675	0.426525
Foxn3	0.868469	6.39599	3.57063	0.05881	0.426525
Gstm5	2.17305	8.02558	3.59131	0.0580825	0.426525
Romo1	1.3392	3.49792	3.56414	0.0590404	0.426525
Tom1l1	1.75323	3.79487	3.5559	0.0593343	0.426525
Trim33	-0.706693	5.40346	3.56426	0.059036	0.426525
Insr	1.12072	4.43091	3.58858	0.058178	0.426525
Tasp1	-1.30283	2.91719	3.55563	0.0593437	0.426525
Afg3l1	-1.04633	3.98906	3.56759	0.0589177	0.426525
Aga	-1.27282	3.33069	3.55177	0.0594819	0.426968
Ccdc125	1.25945	4.24829	3.55153	0.0594904	0.426968
Wwtr1	-4.44202	1.13482	3.54781	0.0596242	0.427556
Pcgf3	-1.0798	3.79843	3.54705	0.0596516	0.427556
2310015A10Rik	0.965775	3.72853	3.54391	0.0597644	0.42808
Ankra2	1.02025	4.08105	3.53172	0.0602051	0.428108
Sgk3	0.697065	6.08507	3.53615	0.0600448	0.428108
Crtc3	-1.38208	2.91454	3.5395	0.0599237	0.428108
Tbc1d1	-0.620928	5.59581	3.53586	0.0600552	0.428108
Aldh1a1	1.6302	11.278	3.53638	0.0600365	0.428108
Smad4	-0.641746	5.0272	3.53174	0.0602046	0.428108
Gpat3	-1.9571	2.46343	3.53349	0.060141	0.428108
Coil	-1.36689	2.94989	3.53251	0.0601766	0.428108
Arrb1	1.04607	7.74488	3.53462	0.0601003	0.428108
Pcdh7	-3.36376	1.75101	3.54061	0.0598836	0.428108
Msantd2	-1.36642	3.48682	3.53323	0.0601505	0.428108
Pabpc1	1.41566	12.0553	3.5271	0.0603733	0.428738
Vps13b	0.798266	5.34889	3.52766	0.0603529	0.428738
Numb	-1.16211	4.13242	3.52568	0.0604249	0.428822
Klf13	0.816016	5.54457	3.5199	0.0606359	0.429376
Mvb12b	1.2239	3.71159	3.52071	0.0606065	0.429376
Tmem70	-0.840949	4.39094	3.52178	0.0605674	0.429376
Wdr55	0.836724	4.31659	3.51918	0.0606623	0.429376
Cd28	-0.808411	5.46833	3.51271	0.0608996	0.429645
Pithd1	1.24403	8.01441	3.51592	0.0607818	0.429645
Gm5069	-2.88589	2.25561	3.51337	0.0608754	0.429645
Rpl38	0.846893	9.65263	3.51385	0.0608577	0.429645
Ezh2	1.02099	4.73411	3.51457	0.0608314	0.429645
Trbd1	-2.36373	1.81812	3.5039	0.0612245	0.431091
Odc1	1.07636	9.04891	3.50567	0.0611593	0.431091
Pdlim7	-1.54137	3.65727	3.50438	0.0612068	0.431091
Etfbkmt	-1.58454	3.40461	3.50238	0.0612808	0.431151
Rad52	1.29668	3.06124	3.50043	0.0613531	0.431151
Engase	2.2224	2.44488	3.50045	0.061352	0.431151
2610021A01Rik	-1.29521	3.13456	3.49918	0.0613991	0.431194
Ggps1	0.780339	6.38662	3.49636	0.0615038	0.431648
Lgmn	1.15639	6.315	3.49309	0.0616254	0.431727
Kctd14	2.21108	2.10753	3.49283	0.0616352	0.431727
Ccdc167	1.6307	3.14418	3.49435	0.0615786	0.431727
Chst10	1.33244	3.62303	3.48871	0.0617886	0.43252
Fundc1	0.882622	4.64703	3.48723	0.0618438	0.432626
Gm10076	1.6609	7.68103	3.48519	0.0619201	0.432878
Nup54	-1.15272	4.46305	3.48327	0.0619922	0.433102
Tstd3	0.936227	4.62058	3.48207	0.0620372	0.433136
Farsa	-0.872865	5.26708	3.4771	0.0622238	0.433876
Atp6v0d1	0.858379	6.68386	3.47763	0.0622037	0.433876
Dnaaf2	4.17	1.35215	3.46924	0.06252	0.433977
Ttl	2.36141	1.78719	3.47054	0.0624708	0.433977
Fbrsl1	-1.88217	2.38468	3.47068	0.0624657	0.433977
Gabarapl2	1.66457	11.5488	3.4739	0.0623442	0.433977
Slc27a1	-2.15703	1.68059	3.47116	0.0624475	0.433977
Nagpa	-0.9345	4.05782	3.47028	0.0624806	0.433977
Dok4	-2.34514	1.269	3.46984	0.0624973	0.433977
Hrh2	-1.39267	3.4604	3.46324	0.0627473	0.434994
Nisch	-0.893636	4.84761	3.46328	0.0627459	0.434994
Slc25a24	0.863317	4.5258	3.46179	0.0628024	0.435096
Zfp24	-0.862388	5.03969	3.46043	0.0628538	0.435173
Ube2r2	1.63628	11.6534	3.45797	0.0629475	0.435542
Clasp1	1.00627	3.97217	3.45631	0.0630109	0.435701
Cd40	-1.00839	4.769	3.45478	0.0630692	0.435824
Riok3	1.6032	11.6766	3.45242	0.0631593	0.436167
Tarm1	-1.70154	3.39005	3.44923	0.0632814	0.436183
Lifr	1.73532	4.29586	3.44773	0.0633387	0.436183
Cep97	-1.10397	4.34576	3.44854	0.0633078	0.436183
Naa25	-0.932039	4.84821	3.44707	0.0633639	0.436183
D6Wsu163e	0.826938	4.37945	3.44862	0.0633047	0.436183
Rbm41	-1.79312	2.45186	3.44404	0.0634802	0.436705
Ly6g	-1.80438	4.9092	3.43647	0.0637718	0.437873
Gbp4	-1.0121	7.17932	3.43653	0.0637694	0.437873
Ppp3cb	0.866783	5.23483	3.43733	0.0637385	0.437873
Cwc27	-1.21299	3.73021	3.43296	0.0639074	0.438235
Fam83d	4.30188	0.619706	3.42825	0.0640898	0.438235
Trp53i11	-1.6873	2.94525	3.42776	0.0641091	0.438235
Ms4a6d	-0.915457	6.20998	3.42671	0.0641498	0.438235
Fam192a	0.621709	5.38692	3.4297	0.0640335	0.438235
Leng8	1.307	2.91317	3.43249	0.0639255	0.438235
Rsad1	4.266	1.42011	3.42941	0.0640449	0.438235
Extl3	1.11876	2.98214	3.42702	0.0641379	0.438235
Prim1	-1.05739	4.37382	3.42445	0.0642375	0.438556
Pak1	-1.43949	3.6257	3.41942	0.0644338	0.439618
Nefh	-3.141	1.23624	3.41417	0.0646389	0.439904
N6amt1	-1.188	2.92153	3.41485	0.0646121	0.439904
Gltp	0.757293	4.916	3.41543	0.0645895	0.439904
Atg16l1	-0.743932	4.99988	3.41427	0.064635	0.439904
Itga9	3.33239	1.92628	3.41146	0.0647451	0.440142
Vwa5a	0.925547	6.82754	3.41119	0.0647556	0.440142
Atxn7	-1.0474	4.08782	3.40916	0.0648356	0.440408
Sfr1	0.767743	5.10317	3.37117	0.0663467	0.440462
Ubac1	1.40188	8.30866	3.33658	0.0677555	0.440462
Trbv13.2	-1.38835	3.28441	3.35873	0.0668494	0.440462
Med28	0.692915	6.12931	3.3645	0.0666159	0.440462
Abhd4	1.08409	6.65324	3.34731	0.0673148	0.440462
Slc6a6	-0.828011	4.74757	3.39212	0.0655088	0.440462
Elob	1.29975	8.8749	3.36248	0.0666975	0.440462
Cenpq	1.3092	6.1197	3.39193	0.065516	0.440462
Gm6421	1.52214	4.77843	3.36968	0.0664067	0.440462
Zfp729a	0.954815	4.29122	3.36366	0.0666497	0.440462
Fbxl5	-0.695669	7.4724	3.36913	0.0664288	0.440462
Nfxl1	-1.60961	2.8625	3.33652	0.0677578	0.440462
Zfp84	-0.962068	3.89217	3.34792	0.0672902	0.440462
Wfikkn2	2.72827	1.51328	3.36747	0.0664956	0.440462
Zswim8	1.24443	3.19808	3.35797	0.0668805	0.440462
Clasrp	-1.52947	2.96385	3.34285	0.0674976	0.440462
Acaa1a	-0.843479	5.2695	3.35616	0.0669539	0.440462
Chchd3	0.615386	6.08805	3.3984	0.0652597	0.440462
Hadh	1.25467	3.97074	3.35322	0.0670738	0.440462
Tifa	0.687697	5.44115	3.3401	0.0676104	0.440462
Mllt1	-1.55825	2.54601	3.38262	0.0658874	0.440462
Ak6	-1.0216	3.53343	3.39902	0.065235	0.440462
Chmp5	0.687728	6.43011	3.36827	0.0664635	0.440462
AU041133	1.85481	1.96981	3.35386	0.0670477	0.440462
Wdr24	1.63633	2.55549	3.39914	0.0652306	0.440462
Zc3hav1	0.699383	8.34585	3.35652	0.0669395	0.440462
Trbv31	1.79503	2.58064	3.38819	0.0656649	0.440462
Dcaf11	0.686702	6.18081	3.34388	0.0674555	0.440462
Cit	1.55927	3.81049	3.3791	0.0660281	0.440462
Antxr2	-0.920098	5.25608	3.33585	0.0677854	0.440462
Acad12	-2.01792	2.51615	3.39571	0.0653664	0.440462
Pus7	-1.6887	3.25737	3.35956	0.066816	0.440462
Ube4a	0.871256	4.40711	3.33633	0.0677654	0.440462
Fam204a	1.07235	4.20841	3.3619	0.0667212	0.440462
Dhrs3	-1.05703	5.0345	3.40246	0.0650993	0.440462
Fam78a	-1.04603	4.32573	3.38544	0.0657747	0.440462
Phf2	2.40076	1.47947	3.39637	0.06534	0.440462
Tmem9	1.22416	3.35116	3.35883	0.0668457	0.440462
Gas2l3	2.13327	0.9983	3.34226	0.0675218	0.440462
Utp14a	-0.586305	5.87444	3.35837	0.0668643	0.440462
Timp3	-4.60208	1.65839	3.34234	0.0675184	0.440462
Exo5	1.25324	3.60381	3.40308	0.0650748	0.440462
Tpcn1	1.81692	4.25411	3.33895	0.0676576	0.440462
Lmo2	1.41781	8.88819	3.37556	0.0661699	0.440462
Siva1	-1.18026	3.0124	3.39428	0.0654228	0.440462
Foxo4	1.70383	7.49993	3.36089	0.0667621	0.440462
Slc7a5	1.70793	5.24995	3.33662	0.0677536	0.440462
Tspan17	-1.69597	4.83648	3.39992	0.0651996	0.440462
Rbm4	1.55754	2.39103	3.33957	0.0676324	0.440462
Agpat1	-1.61725	1.99749	3.38608	0.0657491	0.440462
Pfkp	-0.821934	7.04138	3.33923	0.0676464	0.440462
Ly6c2	-0.94247	9.31324	3.38016	0.0659857	0.440462
Gm15832	-1.34466	3.56927	3.36622	0.0665463	0.440462
Taf1a	-1.50042	3.40645	3.37948	0.0660129	0.440462
Stom	1.12806	8.81055	3.37599	0.0661527	0.440462
Ndrg3	0.924741	5.08127	3.3361	0.067775	0.440462
Ackr1	1.93629	3.73889	3.40611	0.0649553	0.440462
Gm12174	1.13544	2.83515	3.38837	0.0656578	0.440462
Fbxo22	-0.796591	5.13091	3.35538	0.0669858	0.440462
Pfkfb1	-3.85547	1.0278	3.37925	0.0660221	0.440462
Nudt22	2.04414	2.1697	3.34824	0.0672769	0.440462
Atp5g1	-0.893284	5.68756	3.34488	0.0674144	0.440462
Tnk2os	2.73135	2.26092	3.37732	0.0660995	0.440462
Rbm27	0.859813	4.65614	3.34178	0.0675417	0.440462
Mkrn1	1.63646	12.4117	3.37444	0.0662152	0.440462
A530017D24Rik	2.26023	2.68243	3.37921	0.0660237	0.440462
Atp5l	1.22228	8.94282	3.34668	0.0673406	0.440462
AW554918	2.73268	1.45756	3.33936	0.067641	0.440462
Itpr3	-0.854874	4.43984	3.3811	0.0659481	0.440462
Spc24	1.33417	4.01809	3.34439	0.0674346	0.440462
C1qtnf12	-2.5849	0.945366	3.39672	0.0653262	0.440462
Tbc1d10b	0.861084	4.47974	3.39869	0.0652482	0.440462
B4galt7	-0.881806	4.09351	3.32252	0.0683368	0.441417
Pdlim2	1.22348	3.5844	3.32327	0.0683058	0.441417
Pafah1b1	0.630348	7.74718	3.32979	0.0680357	0.441417
1500011B03Rik	1.17319	3.88256	3.32618	0.068185	0.441417
Hist1h4c	2.84954	3.50315	3.32213	0.068353	0.441417
Hfe	1.24638	5.49499	3.32628	0.068181	0.441417
lr4a	-1.52552	3.88402	3.3238	0.0682839	0.441417
Parpbp	-2.15093	2.14062	3.32142	0.0683828	0.441417
C130050O18Rik	1.33073	2.95272	3.32466	0.068248	0.441417
Map4k5	1.45573	6.41183	3.32906	0.0680658	0.441417
Zbtb37	0.935342	4.29854	3.32231	0.0683457	0.441417
Cat	1.55133	11.5309	3.31486	0.0686561	0.442916
Rexo2	1.62592	8.38968	3.30989	0.0688641	0.443727
A530064D06Rik	-1.18475	4.35922	3.31024	0.0688496	0.443727
Sesn2	-2.06485	2.01642	3.30806	0.0689409	0.443956
Trim47	-4.3507	1.20551	3.30191	0.0691993	0.444029
Gfpt1	1.09445	4.1436	3.30547	0.0690494	0.444029
B9d2	-1.4056	2.71528	3.30356	0.0691299	0.444029
Elovl7	2.19094	3.1491	3.30241	0.0691783	0.444029
Stradb	1.49116	8.15323	3.3043	0.0690986	0.444029
Zfp277	0.708282	5.23582	3.30276	0.0691636	0.444029
Rnf44	-1.27953	2.73734	3.29807	0.0693614	0.44454
Irak1	0.823136	5.49629	3.29878	0.0693313	0.44454
Por	-1.29287	3.47322	3.29206	0.0696156	0.444584
Dpp8	0.595961	6.18105	3.29316	0.0695688	0.444584
Acad9	-1.07851	3.70079	3.2911	0.0696563	0.444584
Usp10	1.33674	3.19269	3.29109	0.0696569	0.444584
Rce1	1.14286	3.88345	3.29154	0.0696377	0.444584
Ccdc71l	1.36417	6.96546	3.29179	0.069627	0.444584
Vav3	1.03051	4.77402	3.29647	0.0694288	0.444584
Srsf11	0.6095	6.65513	3.28684	0.0698375	0.444864
Zranb1	0.757619	6.06707	3.28617	0.0698659	0.444864
Gm37716	2.11078	1.48017	3.28641	0.0698556	0.444864
Rrad	-1.64066	2.7608	3.28701	0.0698299	0.444864
Imp4	-0.710639	5.2598	3.28317	0.0699934	0.444928
Oaz1	1.49907	12.0798	3.28302	0.0699999	0.444928
Ghitm	1.46601	11.8019	3.28388	0.0699636	0.444928
Ercc5	-1.02228	3.92173	3.27943	0.0701531	0.44564
Med8	-0.765933	5.46929	3.27523	0.0703331	0.445681
Sh3bgrl	0.785116	7.21231	3.27445	0.0703667	0.445681
Bnip3l.ps	1.90832	5.56495	3.27349	0.0704076	0.445681
Gusb	0.871657	6.03598	3.27795	0.0702166	0.445681
Dnah17	4.21025	1.23126	3.27418	0.0703779	0.445681
E2f1	2.24599	1.42303	3.27392	0.0703893	0.445681
Mtr	0.936357	4.77531	3.27205	0.0704696	0.445811
2002-03-01	1.57865	13.1498	3.27108	0.0705113	0.445813
Neb	-2.35157	2.10636	3.26469	0.0707863	0.446593
Wasf2	0.672102	5.82801	3.26341	0.0708417	0.446593
Gk	-0.932065	4.88718	3.26656	0.0707056	0.446593
Map1lc3b	1.55451	11.4936	3.26391	0.0708203	0.446593
Klrg1	-1.22936	5.79988	3.26554	0.0707496	0.446593
Fto	-2.50934	1.21897	3.25703	0.0711178	0.44676
Gm17344	1.89655	2.69653	3.2561	0.0711583	0.44676
Upp1	-1.8658	5.76861	3.25957	0.0710077	0.44676
4930404H24Rik	-4.60073	0.968855	3.26014	0.070983	0.44676
Serpina3f	-1.32216	5.97174	3.25654	0.0711389	0.44676
Cdc42ep2	-1.10316	4.20867	3.25807	0.0710728	0.44676
Iffo1	1.09282	3.50002	3.26004	0.0709872	0.44676
Otulin	-0.712154	6.25648	3.24863	0.071483	0.448537
Gpr27	-4.48616	0.163555	3.24726	0.0715431	0.448653
4933408B17Rik	-4.48626	0.899794	3.24431	0.0716718	0.448786
Insig2	1.17936	3.60206	3.24438	0.0716687	0.448786
Mff	1.27159	9.75784	3.24392	0.0716891	0.448786
Akr1e1	1.55371	2.98146	3.23886	0.0719105	0.44991
Sf3b2	-0.636695	6.558	3.23615	0.0720297	0.450394
Nab2	-1.49015	2.74665	3.23475	0.0720913	0.450506
Lipa	0.834516	5.82451	3.23385	0.0721311	0.450506
Tmie	-2.87219	1.40795	3.2326	0.0721861	0.450588
Rfx5	-0.980031	4.22704	3.22537	0.0725052	0.452318
Igfbp5	4.15539	1.6793	3.22257	0.0726293	0.452831
5730409E04Rik	-4.60007	0.4005	3.21888	0.0727936	0.453469
Tcirg1	-0.885744	4.87874	3.21771	0.0728455	0.453469
Babam1	-0.709142	4.53315	3.21743	0.0728579	0.453469
Ppp1r11	-0.847756	5.24992	3.21549	0.0729441	0.453744
Hectd1	0.728739	7.16665	3.21397	0.073012	0.453904
Ndfip1	0.672545	6.21916	3.21133	0.0731302	0.454377
Lockd	1.7464	6.22673	3.20886	0.0732404	0.454799
Clec4a2	-1.21516	4.67025	3.20273	0.0735153	0.456243
Ptpn7	-0.85834	5.73797	3.20172	0.073561	0.456265
H2.Q4	-0.644388	7.85086	3.19404	0.0739072	0.457629
Dhx40	0.639826	6.56744	3.19555	0.0738387	0.457629
Pmp22	-2.89696	3.31778	3.19401	0.0739083	0.457629
Acsbg1	-1.66172	3.2055	3.18978	0.0740999	0.457665
Rpap2	0.808786	4.70224	3.18733	0.0742113	0.457665
Spata24	-1.99342	1.6493	3.19084	0.0740518	0.457665
Txndc9	0.615824	6.5227	3.19026	0.074078	0.457665
Ndufa7	0.822709	5.43322	3.19051	0.0740671	0.457665
Hemk1	-2.53785	1.62513	3.18919	0.0741268	0.457665
Adam10	0.755481	6.89475	3.18751	0.0742028	0.457665
Kifap3	-2.63979	1.8951	3.18431	0.0743485	0.458249
Sec23a	1.21173	6.30035	3.18311	0.0744028	0.458322
Snrpg	-0.876248	5.52262	3.18149	0.0744766	0.458514
Raver2	-2.11937	1.992	3.1766	0.0747002	0.459628
Celf1	0.682732	5.72423	3.17475	0.0747848	0.45986
Psme3	1.76566	9.37388	3.17391	0.0748233	0.45986
2011-09-01	-0.752294	5.71241	3.16762	0.0751119	0.461371
Emc4	-1.09178	3.95813	3.16634	0.0751707	0.461469
Gemin8	4.27215	1.10222	3.16169	0.0753852	0.461874
Crtam	1.48035	2.99992	3.15529	0.0756814	0.461874
Dph2	1.61888	2.29395	3.15398	0.0757418	0.461874
Nxpe2	1.77764	7.14819	3.15444	0.0757205	0.461874
Fam120aos	1.76055	2.71368	3.15479	0.0757045	0.461874
Sucla2	-0.668028	5.40675	3.16277	0.0753351	0.461874
Itga1	-1.73072	2.96269	3.15441	0.0757221	0.461874
Cxcl2	-4.48919	0.480455	3.15678	0.0756123	0.461874
Tmem167b	0.640014	5.73764	3.16352	0.0753009	0.461874
Ints2	-0.922978	3.46962	3.15379	0.0757507	0.461874
Mrps35	-0.894655	4.36134	3.16015	0.0754562	0.461874
Lrp8	-2.19517	1.86675	3.15928	0.0754967	0.461874
Tmem173	-0.692602	6.17855	3.15269	0.0758021	0.461926
Nudt14	-1.259	2.59343	3.14899	0.0759739	0.462531
Cyb5d1	-1.24784	3.17301	3.14848	0.0759978	0.462531
Peak1	-0.965792	3.7264	3.14733	0.0760514	0.462531
Gpatch1	1.17543	2.827	3.14686	0.0760731	0.462531
Nup133	0.841448	4.44849	3.14482	0.0761684	0.462706
Wdr12	-1.02562	4.57243	3.14441	0.0761876	0.462706
Gm3724	1.69279	4.32059	3.14268	0.0762682	0.462867
Crebbp	0.866075	4.55414	3.142	0.0763	0.462867
Nebl	-4.59883	2.67309	3.13968	0.0764086	0.463265
Ten1	-1.29172	3.94819	3.13633	0.0765658	0.463957
Iffo2	-1.50233	2.70324	3.12125	0.0772774	0.466521
Utp4	-0.986527	4.71417	3.12309	0.0771904	0.466521
Trafd1	0.863114	7.40827	3.12147	0.0772671	0.466521
Rplp2	0.997017	8.0171	3.12004	0.0773351	0.466521
Spsb3	0.805671	5.52651	3.12128	0.0772763	0.466521
Cacfd1	-1.64634	2.73275	3.12465	0.0771166	0.466521
Nolc1	-0.814796	4.99325	3.12075	0.0773012	0.466521
Cd177	-1.35959	5.29675	3.12167	0.0772576	0.466521
Pqbp1	0.689922	6.20085	3.11576	0.0775384	0.467396
1110038B12Rik	-1.39791	2.74208	3.11516	0.0775669	0.467396
Fam46a	0.88347	5.83483	3.11298	0.0776707	0.467603
Slc35e1	-0.744888	5.53903	3.11262	0.0776881	0.467603
Wipi2	0.585522	5.96682	3.11157	0.077738	0.467643
Pidd1	-2.7465	1.33435	3.10956	0.0778339	0.467959
Lacc1	-2.67085	0.969364	3.10693	0.0779598	0.468081
S100a13	0.7708	6.81474	3.10641	0.0779846	0.468081
Pstpip2	-1.94025	1.94698	3.10822	0.0778982	0.468081
Tmem230	-1.18767	4.10647	3.10514	0.0780454	0.468186
Uros	0.969657	4.94853	3.10166	0.0782124	0.468926
Ifng	-2.07973	2.78992	3.0977	0.0784028	0.469806
mt.Co1	1.16394	14.1113	3.09637	0.0784671	0.469931
Mmp25	4.27354	1.38208	3.09448	0.078558	0.470214
Fam199x	-1.88405	2.12002	3.0933	0.0786153	0.470296
Hdgfl2	-0.877988	4.26438	3.08848	0.0788486	0.470908
Cstf1	-0.730015	4.08647	3.09017	0.0787665	0.470908
Cd83	-0.846335	6.48958	3.08903	0.0788217	0.470908
Iscu	1.51149	9.88018	3.08379	0.0790762	0.471229
Stard4	-1.13788	3.83573	3.0844	0.0790464	0.471229
Fam214b	1.37225	7.92973	3.08229	0.0791488	0.471229
Gm12940	-1.24463	3.61427	3.08197	0.0791647	0.471229
Agfg1	0.623021	6.6223	3.08503	0.0790156	0.471229
Spin1	0.796503	5.16436	3.08273	0.0791277	0.471229
Egln2	-0.869238	4.63322	3.07947	0.0792863	0.471513
Gnpat	-0.895852	4.95688	3.07919	0.0792999	0.471513
Amn1	1.03308	4.26542	3.07168	0.079667	0.471644
Gm15448	-1.90352	2.93837	3.07479	0.079515	0.471644
Adora2a	-1.43678	2.82165	3.07158	0.079672	0.471644
Klhl25	0.859549	5.2575	3.07273	0.0796158	0.471644
Rpl17	0.751196	10.8574	3.0745	0.0795292	0.471644
Nudt7	-1.24363	3.58458	3.07161	0.0796708	0.471644
Ergic2	0.64136	5.91709	3.0778	0.0793676	0.471644
Ighv1.52	-2.56673	1.17459	3.07369	0.0795685	0.471644
Nxpe4	1.24556	5.04482	3.06927	0.0797852	0.472055
cl1	-1.79453	2.88345	3.06769	0.0798628	0.472255
Iglj1	-2.26512	1.59733	3.06141	0.0801721	0.473565
Cyp2b10	-2.57267	2.65106	3.0616	0.0801627	0.473565
Mrpl2	-0.882303	4.02185	3.05922	0.0802801	0.473943
Ift140	1.27974	7.78768	3.05256	0.0806099	0.475629
Cul4a	1.40078	8.28533	3.04093	0.0811892	0.475629
Fkbp2	-1.45767	3.31251	3.03752	0.0813603	0.475629
Invs	-1.23573	3.1394	3.04728	0.0808725	0.475629
Rad51ap1	-2.21104	2.63393	3.03106	0.0816846	0.475629
Arhgef12	1.49163	6.72347	3.02793	0.0818424	0.475629
Sbf2	-1.69973	2.30209	3.04699	0.0808872	0.475629
Psmd12	0.681168	6.0463	3.05047	0.0807137	0.475629
Ifi205	-1.36206	5.61779	3.04103	0.0811845	0.475629
Tnfrsf9	-1.72334	3.72143	3.03133	0.0816712	0.475629
Eif6	-0.775023	5.82345	3.04269	0.0811012	0.475629
Ndufaf7	-0.905298	4.30663	3.03616	0.0814282	0.475629
Cdc27	0.638668	5.26333	3.03158	0.0816585	0.475629
Wdyhv1	-1.07124	3.77958	3.03239	0.0816179	0.475629
Gclm	1.73391	9.70925	3.04073	0.0811994	0.475629
Mettl21a	-1.11814	3.41893	3.03555	0.0814588	0.475629
Kremen1	-1.42449	3.17158	3.04611	0.0809307	0.475629
Ppfibp2	-2.47407	2.17318	3.03424	0.0815245	0.475629
Ssu72	-0.614158	6.62492	3.02787	0.0818453	0.475629
Ppid	-0.823086	5.33989	3.0293	0.0817732	0.475629
Kdm4a	0.636189	5.68217	3.03877	0.0812975	0.475629
Rbm14	1.11634	3.76299	3.03014	0.0817308	0.475629
Lpcat4	-2.72001	1.0345	3.03362	0.0815559	0.475629
Prpf31	-0.721674	5.37108	3.05014	0.0807303	0.475629
Dapk1	-1.16414	4.14151	3.03901	0.0812857	0.475629
Necap2	0.798479	6.63658	3.02967	0.0817549	0.475629
Gm28437	0.925307	5.25368	3.04269	0.0811014	0.475629
Gorasp1	-2.03467	1.85979	3.0437	0.0810511	0.475629
Mcmbp	0.607738	6.0547	3.04128	0.0811719	0.475629
Ube2l6	1.65907	14.0714	3.02694	0.0818924	0.475646
Ino80c	0.649877	5.617	3.02592	0.0819439	0.475689
Pten	0.712229	6.73368	3.0241	0.0820358	0.475967
Gm28809	-2.40169	1.90741	3.02298	0.0820926	0.47604
Eif2s2	0.692812	6.95676	3.01702	0.0823948	0.476211
Cstb	-0.750686	5.11372	3.02036	0.0822253	0.476211
Zfp36l2	0.911709	6.20617	3.01868	0.0823106	0.476211
Prelid2	-3.31541	0.925836	3.01741	0.082375	0.476211
Zxdb	-1.64909	2.23583	3.01543	0.0824756	0.476211
Cep164	1.23179	2.98113	3.01598	0.0824476	0.476211
Junb	-1.42071	3.98214	3.01893	0.0822976	0.476211
H3f3c	1.40353	3.20766	3.02088	0.0821988	0.476211
Znrf3	2.171	1.79142	3.01275	0.0826119	0.476357
Pparg	1.50811	3.306	3.01257	0.0826214	0.476357
Ubb	1.32382	12.2844	3.00989	0.082758	0.476357
Ptpn14	1.19221	4.47598	3.01095	0.0827038	0.476357
Micu1	0.808101	5.26273	3.00973	0.0827659	0.476357
Gpr171	-0.790659	5.92415	3.0109	0.0827063	0.476357
Gm26517	2.6117	1.16899	3.00839	0.0828345	0.476412
Ccsap	-3.16221	1.13987	3.00695	0.082908	0.476412
Gm10522	-3.19999	1.02609	3.00705	0.0829031	0.476412
Gde1	0.781172	4.69659	3.00427	0.0830453	0.476692
Llgl2	-1.81215	2.26069	3.00447	0.0830353	0.476692
Hace1	1.00249	4.53352	3.00286	0.0831176	0.476853
Pabpc4	1.31226	7.70934	3.00012	0.0832583	0.476899
Myct1	-1.83074	3.14623	3.00079	0.0832241	0.476899
Gadd45a	1.52468	7.28019	2.9984	0.0833467	0.476899
Il18rap	-0.894865	7.1517	2.99984	0.0832728	0.476899
Ldlr	-1.20393	3.19598	2.9987	0.0833315	0.476899
Bola3	1.83919	9.06696	2.99605	0.0834679	0.477086
Gm28661	1.13488	4.27124	2.99646	0.0834464	0.477086
Gata1	1.36129	4.98965	2.99317	0.0836161	0.477482
Rnf216	1.39208	3.04159	2.99299	0.0836258	0.477482
AI662270	1.61997	9.22839	2.99186	0.0836842	0.477562
1110034G24Rik	0.803255	5.19261	2.98809	0.083879	0.478168
Zfp934	1.63493	2.45365	2.98842	0.083862	0.478168
Frmd4b	1.03463	4.58122	2.98368	0.084108	0.479032
Rhobtb1	2.07517	1.60285	2.9826	0.0841638	0.479032
Cd200	0.967822	3.62799	2.98285	0.0841512	0.479032
4930599N23Rik	2.9322	1.43951	2.97907	0.0843479	0.479716
Dolk	-1.75506	1.78352	2.97858	0.084373	0.479716
Polh	-1.11971	3.94176	2.97656	0.0844789	0.479735
C1qbp	-0.941319	4.01729	2.97596	0.0845099	0.479735
Setd3	0.588661	6.87072	2.97708	0.0844513	0.479735
Ndufaf4	-1.05558	3.80368	2.97336	0.0846459	0.480001
Srp19	-1.1132	4.18459	2.97367	0.0846295	0.480001
Ppp1r7	-0.720453	4.82645	2.97107	0.0847659	0.480084
Gm12715	-1.6413	1.90981	2.97013	0.0848148	0.480084
2001-09-01	0.915278	6.15517	2.97145	0.0847456	0.480084
Bnip3l	1.63522	13.5344	2.96968	0.0848386	0.480084
Slc24a3	-1.62718	2.9307	2.95891	0.0854057	0.480397
Gbp10	-2.34047	3.56736	2.96055	0.0853192	0.480397
A530072M11Rik	-3.11653	1.09646	2.96584	0.0850404	0.480397
Cdca3	1.00758	4.91451	2.96387	0.0851441	0.480397
Chil5	-2.65397	2.36846	2.96078	0.0853068	0.480397
Tmem216	-2.06707	1.51374	2.9622	0.0852317	0.480397
Mpp1	1.49974	9.8978	2.96436	0.0851179	0.480397
Pprc1	2.65506	1.50259	2.96428	0.0851224	0.480397
Amfr	0.588051	7.04327	2.95879	0.0854117	0.480397
Usp21	-0.929574	3.76876	2.96526	0.0850708	0.480397
Rex1bd	1.24999	3.06824	2.95847	0.0854286	0.480397
Zmynd19	-1.22299	3.31657	2.96322	0.0851782	0.480397
Hddc3	-2.42008	1.55267	2.95439	0.0856446	0.48136
Zfp180	0.764631	5.93546	2.95283	0.0857273	0.481574
9830132P13Rik	2.18671	2.47805	2.94891	0.0859354	0.481989
Poglut1	-0.918354	4.57241	2.94967	0.0858953	0.481989
Pnpla8	0.947116	7.08722	2.94979	0.0858886	0.481989
C430042M11Rik	2.06437	1.2004	2.94426	0.0861833	0.483129
Utp20	-1.04532	4.01485	2.94314	0.0862427	0.48321
Wdr81	1.02803	4.65562	2.94099	0.086358	0.483353
Elac1	1.30153	3.41089	2.94168	0.0863211	0.483353
Gas8	-2.55709	1.53152	2.93959	0.0864329	0.483522
mt.Co3	1.16483	2.94729	2.93742	0.0865488	0.483919
Psma2	0.559039	7.75208	2.93182	0.0868495	0.485097
Pdhb	0.594091	5.91318	2.93219	0.0868295	0.485097
Pnpla2	0.928031	4.42345	2.92616	0.0871546	0.486549
Cep83	0.920576	4.70231	2.9242	0.0872603	0.486685
F11r	1.10443	3.74446	2.92404	0.0872692	0.486685
Hax1	0.81625	6.03061	2.92071	0.0874492	0.487437
Rnf10	1.59318	12.2404	2.91734	0.0876323	0.487701
Psmc6	0.576584	6.2443	2.91793	0.0876	0.487701
Chka	-1.09336	3.38486	2.91863	0.0875623	0.487701
Ticrr	-2.82088	0.64812	2.91593	0.0877089	0.487875
Ccdc88b	-0.989058	5.3484	2.90285	0.0884233	0.490228
Cgnl1	-2.43182	3.57476	2.89771	0.0887056	0.490228
Pars2	-2.0128	2.27781	2.90566	0.088269	0.490228
Rps4l	1.84867	1.37123	2.89657	0.0887685	0.490228
Emid1	-2.21929	1.53851	2.8995	0.0886068	0.490228
Scp2.ps2	1.71734	1.53284	2.90137	0.0885041	0.490228
Wdr91	-1.5031	2.53187	2.89975	0.0885931	0.490228
Klhdc3	-1.65622	1.75313	2.9064	0.0882285	0.490228
Tradd	-1.1695	3.78966	2.90132	0.0885068	0.490228
Nudt15	1.46375	2.30431	2.90395	0.0883628	0.490228
Stra6l	4.32032	1.37477	2.90709	0.0881911	0.490228
Gm12481	1.28699	2.10394	2.90421	0.0883486	0.490228
Tmem198b	-2.12668	1.92084	2.89809	0.0886845	0.490228
Ndufb3	-0.620333	5.04766	2.89682	0.0887545	0.490228
Relb	-0.785128	4.77551	2.89095	0.0890785	0.490304
Gimap7	-0.825839	6.18756	2.8889	0.0891916	0.490304
Crat	1.42316	6.69722	2.89422	0.088898	0.490304
Rars	-0.685159	5.99097	2.88951	0.0891581	0.490304
Rpl35	0.747981	9.28954	2.88949	0.0891594	0.490304
Cxcr2	-1.24729	7.0556	2.89027	0.0891158	0.490304
Skp1a	0.666026	7.61545	2.89179	0.0890317	0.490304
Ndufb9	0.841264	6.14303	2.89096	0.0890779	0.490304
Batf	-1.05198	4.64964	2.88998	0.089132	0.490304
Diaph2	1.37654	3.30142	2.88681	0.0893075	0.490691
Rnpc3	1.39031	4.26551	2.8836	0.089486	0.490921
Cd300ld	0.698501	7.15621	2.88477	0.0894206	0.490921
Gfra1	4.2775	1.25191	2.88376	0.0894768	0.490921
Sh3gl1	-0.976365	4.85306	2.87756	0.0898222	0.491248
Gbp11	-2.29447	2.82665	2.8765	0.0898814	0.491248
Sod2	1.05355	7.57935	2.86344	0.0906134	0.491248
Psmd7	-0.822393	5.20342	2.87276	0.09009	0.491248
Sfswap	-0.808814	4.1542	2.8653	0.090509	0.491248
Vps4a	-0.612942	5.59411	2.8716	0.0901552	0.491248
Aqp9	1.043	5.94568	2.86377	0.090595	0.491248
Rbm34	-0.761882	4.44601	2.86611	0.0904632	0.491248
Spata5	0.639751	4.39676	2.87106	0.0901852	0.491248
Cd27	-1.07064	4.70739	2.86608	0.0904652	0.491248
Eef2k	0.989144	4.07811	2.86497	0.0905273	0.491248
Cpeb3	1.96751	2.4202	2.87217	0.0901232	0.491248
Slc25a40	-1.578	2.75525	2.86611	0.0904633	0.491248
Psat1	-1.06786	4.95187	2.86646	0.0904434	0.491248
Gfm2	0.963239	3.66833	2.86726	0.0903984	0.491248
Gm14085	-1.16352	3.96295	2.86466	0.0905449	0.491248
Cramp1l	-1.31985	2.79287	2.87283	0.0900862	0.491248
Togaram1	0.891136	4.71701	2.86298	0.0906394	0.491248
Zfp131	-0.749344	4.90385	2.87678	0.0898656	0.491248
Nbn	0.837455	4.36613	2.86739	0.0903916	0.491248
Hspd1.ps4	-2.87786	4.1262	2.88132	0.0896126	0.491248
Agap1	-1.95217	1.23174	2.87455	0.0899899	0.491248
Cdc25b	1.11122	8.5478	2.87171	0.0901493	0.491248
Tpsb2	-3.69205	2.02827	2.87745	0.0898282	0.491248
Ggact	-1.62204	2.64293	2.86186	0.0907026	0.491344
Ncf1	-0.646037	7.75847	2.85783	0.0909299	0.492328
Ubap2	-2.03305	1.94815	2.85536	0.0910697	0.492385
Fgd4	0.781755	4.89264	2.85474	0.0911052	0.492385
Mreg	-3.14694	0.975864	2.85442	0.0911232	0.492385
Dnajc27	-1.28459	2.41097	2.85477	0.0911033	0.492385
Sparc	-4.84173	2.37799	2.85277	0.0912164	0.492395
Skint3	1.61268	3.58201	2.8528	0.0912149	0.492395
Bag6	0.914957	3.99217	2.85121	0.0913049	0.492626
Irgm2	-1.43218	5.17577	2.84951	0.0914019	0.492862
[truncated: 8,781 more rows]

## Sheet: PyNL_Early-Control
SYMBOL	logFC	logCPM	LR	PValue	FDR
Ccrl2	7.27411	4.45227	48.5184	3.27206e-12	3.52728e-08
Cep55	7.91829	3.27827	38.5428	5.35666e-10	1.92483e-06
Nuf2	6.65894	3.86265	38.5529	5.32894e-10	1.92483e-06
Cxcl9	9.05775	3.73328	37.24	1.04448e-09	2.28653e-06
Nek2	8.0797	3.39631	36.9418	1.2171e-09	2.28653e-06
Serpina3f	5.23205	5.97174	36.8548	1.27265e-09	2.28653e-06
Slc2a6	3.17231	5.54278	33.3692	7.62235e-09	1.17384e-05
Upp1	7.82691	5.76861	32.3482	1.28874e-08	1.73657e-05
Shcbp1	7.83822	3.108	27.9427	1.24963e-07	0.000149678
Gbp2	3.67249	10.3345	27.683	1.4291e-07	0.000154057
Gm5141	-8.83771	2.1531	27.3107	1.73246e-07	0.000155633
Smpdl3b	3.61202	6.05047	27.3893	1.66353e-07	0.000155633
Cenpw	6.65555	2.05983	26.9792	2.05656e-07	0.000170536
Acod1	4.71831	6.37699	26.2985	2.92513e-07	0.00019708
Tnfaip2	2.5072	7.02729	26.3947	2.78306e-07	0.00019708
Il27	6.29388	1.83512	26.4185	2.74891e-07	0.00019708
Oasl2	3.62743	9.58329	25.8842	3.62525e-07	0.000229884
Ms4a6d	2.59527	6.20998	25.1488	5.30732e-07	0.00030112
Bcl2a1d	3.07051	4.73213	25.1635	5.26707e-07	0.00030112
Kif2c	5.74234	3.32561	24.4877	7.47866e-07	0.0004031
Ptpn1	1.97159	5.89796	24.2084	8.64552e-07	0.000443803
Gstk1	-6.41249	2.83637	23.9726	9.77165e-07	0.000478811
1700011B04Rik	8.55109	0.665945	23.7432	1.10085e-06	0.000494463
Gm43672	-4.17757	3.81742	23.7841	1.07769e-06	0.000494463
A630072M18Rik	-3.8461	2.72824	23.4539	1.27946e-06	0.000541213
Icam1	2.383	5.8334	23.4153	1.30534e-06	0.000541213
Fpr2	2.73586	7.03406	23.3424	1.3558e-06	0.000541317
N4bp1	1.89513	4.93213	23.1983	1.46129e-06	0.000562596
Sgo1	7.76847	2.4874	22.6344	1.95942e-06	0.000676335
AA467197	7.50257	2.06067	22.5877	2.00767e-06	0.000676335
Nupr1	2.88553	4.79551	22.6633	1.93022e-06	0.000676335
Oas1g	3.84816	5.12013	22.6162	1.97811e-06	0.000676335
Clec4e	2.51976	7.03993	22.0024	2.72312e-06	0.000889553
Mrgpra2a	7.43307	1.65779	21.6714	3.23581e-06	0.00102594
Fcgr4	2.4722	8.03641	21.1167	4.32141e-06	0.001331
Tpx2	2.38915	5.27488	20.8896	4.86537e-06	0.00138023
Tppp3	3.0504	5.59607	20.9452	4.72607e-06	0.00138023
Pdap1	1.6033	5.21589	20.8996	4.83983e-06	0.00138023
Nipsnap1	-3.11356	4.00801	20.6858	5.41157e-06	0.00149581
Klrg1	3.31758	5.79988	20.6089	5.63338e-06	0.0015182
Cenpp	7.76558	2.03419	20.3574	6.42454e-06	0.00168918
Gcdh	-3.30479	4.52647	20.2363	6.84406e-06	0.00171765
Pdcd1	8.30138	3.19011	20.2343	6.85147e-06	0.00171765
Parpbp	6.19139	2.14062	19.984	7.80927e-06	0.00191327
Inpp4b	-1.74426	5.36962	19.9305	8.0309e-06	0.00192385
Snx7	6.76044	0.895149	19.8193	8.5117e-06	0.00195226
Prdx5	2.14049	7.98688	19.8548	8.35509e-06	0.00195226
Tgm2	2.52561	6.10547	19.7022	9.04958e-06	0.00202341
Babam1	1.73298	4.53315	19.6713	9.19733e-06	0.00202341
Dram1	2.77267	4.81661	19.4401	1.03803e-05	0.002238
Tlr2	2.08733	5.47183	19.3888	1.06629e-05	0.00225384
Zbtb32	4.97158	3.24226	19.3375	1.09531e-05	0.00227067
Ptch1	-3.92406	2.84952	18.6522	1.5687e-05	0.00319068
AI847159	6.43118	1.17994	18.3394	1.84841e-05	0.00368998
Fpr1	2.43302	6.31785	18.1999	1.98886e-05	0.00389816
Cdc42ep2	2.69941	4.20867	18.1519	2.03969e-05	0.0039264
Nanos1	-4.08399	2.66587	18.0939	2.10276e-05	0.0039768
Prc1	4.04086	4.37955	17.9078	2.31868e-05	0.0042365
Gm37716	6.43918	1.48017	17.9308	2.29084e-05	0.0042365
Mapkapk2	1.67057	7.63828	17.7214	2.55732e-05	0.00459465
Gm42547	-7.87524	1.30637	17.181	3.39826e-05	0.00600545
Cdc42ep4	2.14898	4.27803	17.0467	3.64712e-05	0.00634129
Spon1	5.59581	2.5832	16.8801	3.98166e-05	0.00660343
Gzmb	3.61756	8.87718	16.9002	3.93982e-05	0.00660343
Il12rb1	3.90573	3.04797	16.9147	3.90979e-05	0.00660343
Acp2	2.14021	5.09552	16.6505	4.49381e-05	0.00702077
Hck	1.67101	8.19023	16.6552	4.48266e-05	0.00702077
Cnga1	-8.00197	1.87262	16.6988	4.38077e-05	0.00702077
1810022K09Rik	-1.85012	5.21504	16.72	4.33225e-05	0.00702077
Agpat4	1.74023	4.14481	16.5677	4.69446e-05	0.00704709
Stil	7.10447	2.09188	16.5627	4.70677e-05	0.00704709
Erbb3	-3.77414	2.51017	16.6065	4.59938e-05	0.00704709
Mki67	2.53259	7.9909	16.4797	4.91725e-05	0.00726137
Cit	3.78068	3.81049	16.4103	5.10086e-05	0.00743071
Emp1	3.04621	4.13468	16.3094	5.37958e-05	0.00753141
Plscr1	2.75855	4.52333	16.3186	5.35362e-05	0.00753141
Cdc25c	7.15898	1.80975	16.3542	5.25408e-05	0.00753141
Bphl	-3.10051	3.23311	16.2733	5.48324e-05	0.00757811
Myo1d	5.15607	2.87685	16.2441	5.56824e-05	0.00759069
Tubb3	5.4065	2.86515	16.2221	5.63317e-05	0.00759069
Gngt2	1.68654	6.9816	16.1348	5.89887e-05	0.00775486
Capn10	3.31717	2.37959	16.1353	5.89749e-05	0.00775486
Suv39h2	5.79648	1.25934	16.1062	5.98885e-05	0.00777829
Il7r	-1.82723	6.22578	15.9327	6.56347e-05	0.00842312
Slc16a3	2.52118	5.16342	15.865	6.80246e-05	0.00862711
Ubald2	1.87191	4.89393	15.8044	7.02385e-05	0.00880432
Crot	-1.56733	5.80567	15.7717	7.14646e-05	0.00885504
Efhd2	2.14409	4.89623	15.715	7.36377e-05	0.00902062
Ccdc88b	2.36679	5.3484	15.6645	7.56309e-05	0.00916069
Gm15931	3.11028	3.93168	15.6421	7.65317e-05	0.0091668
Uhrf1	3.7802	3.54261	15.5715	7.94433e-05	0.00939965
mt.Nd1	-2.33594	9.1978	15.5531	8.02196e-05	0.00939965
Rad51ap1	5.84598	2.63393	15.4954	8.27074e-05	0.00949411
Cdca3	2.42289	4.91451	15.4936	8.27872e-05	0.00949411
Rrm2	2.29566	5.35524	15.4289	8.5668e-05	0.00950062
Rbm38	2.74317	4.75823	15.4684	8.38966e-05	0.00950062
2310043P16Rik	-5.10449	2.10585	15.4478	8.48165e-05	0.00950062
Acox1	-2.74359	5.30637	15.4135	8.63692e-05	0.00950062
Fzr1	2.97273	6.20875	15.3756	8.81175e-05	0.00951125
Pclaf	3.80361	5.26408	15.3732	8.82306e-05	0.00951125
Hmox1	3.33478	4.88762	15.302	9.16186e-05	0.00977869
Trim16	5.43204	1.8975	15.2794	9.27231e-05	0.00979956
Dnaaf2	-7.83112	1.35215	15.2419	9.45819e-05	0.00987148
Mill2	5.95485	1.60058	15.2289	9.5235e-05	0.00987148
Pgrmc1	-2.16196	5.53687	15.1969	9.68617e-05	0.00994447
Esm1	7.57511	1.61333	15.1479	9.9409e-05	0.0101097
Gm11427	2.08037	5.21146	15.1233	0.00010071	0.0101258
Pitpnm1	2.08865	4.40442	15.1096	0.000101446	0.0101258
Cyth3	2.12422	5.78476	15.0697	0.000103615	0.010176
Fam13b	-2.04163	5.51814	15.0486	0.00010478	0.010176
Usp10	-2.78027	3.19269	15.0593	0.000104188	0.010176
mt.Nd2	-2.68623	6.52748	15.0086	0.000107023	0.0102098
Tmem245	-2.04185	4.39462	15.0186	0.000106459	0.0102098
Nfs1	1.56895	4.95405	14.881	0.000114508	0.0106414
Ccr3	-3.57178	4.46192	14.8817	0.000114467	0.0106414
Apoe	-4.61945	8.57035	14.9085	0.000112851	0.0106414
2700081O15Rik	6.16328	1.84736	14.8368	0.000117229	0.0107095
Trafd1	1.93574	7.40827	14.8486	0.000116495	0.0107095
Zfpm1	3.22131	2.98187	14.8168	0.000118473	0.0107323
Spdl1	5.32688	2.36473	14.7351	0.000123719	0.0111141
Gbp7	1.9545	7.20916	14.7038	0.00012579	0.0112067
Slc52a3	6.40056	0.824452	14.6824	0.000127229	0.011242
Irf1	1.88411	8.33599	14.6574	0.000128931	0.0112998
Ly6i	3.37484	5.96404	14.5565	0.000136019	0.0118249
Arf5	3.06706	6.30593	14.4551	0.00014354	0.0122806
Mybpc3	5.95613	0.320904	14.4601	0.000143163	0.0122806
Gm43698	-5.61712	1.78644	14.3907	0.000148533	0.0126077
Vps37a	-1.86817	5.23835	14.3422	0.000152413	0.0127365
Bcl3	4.73981	0.838131	14.3568	0.000151235	0.0127365
Pbk	5.15572	2.96698	14.2873	0.000156917	0.013012
Aatk	5.17831	1.16121	14.2381	0.000161072	0.0132547
Gm4208	7.65491	1.05613	14.2041	0.000164011	0.0133942
Gpt2	-9.32839	1.7318	14.1892	0.000165318	0.0133994
Rad52	-2.53044	3.06124	14.0658	0.000176524	0.014201
Vwa8	-2.86002	3.47854	14.0296	0.000179956	0.0142428
Sertad2	2.08031	5.09928	14.03	0.000179919	0.0142428
Glmn	-2.35951	3.31237	14.0186	0.000181008	0.0142428
Haus7	-3.38982	2.79479	13.983	0.000184472	0.0143066
Ccnt2	-1.39095	5.43282	13.9864	0.00018414	0.0143066
Ccnb1	3.78152	4.54424	13.9388	0.000188855	0.0145418
Hspa2	5.3026	0.901631	13.9128	0.000191491	0.0146402
Sypl	-1.54822	5.23389	13.8713	0.000195762	0.0147575
Slc25a19	1.8273	4.41497	13.8834	0.000194507	0.0147575
Gm30211	-4.32899	2.20577	13.7307	0.000210976	0.015685
Kif18b	6.18036	1.04478	13.7358	0.000210401	0.015685
Bcas3os1	-7.8911	1.90515	13.6484	0.000220433	0.0158001
Mafk	1.82758	5.63233	13.6708	0.000217819	0.0158001
Btf3l4	-1.70539	3.79297	13.6703	0.000217873	0.0158001
Ptger4	1.72021	4.09782	13.642	0.000221177	0.0158001
Tbc1d32	-4.06531	2.01541	13.6408	0.000221319	0.0158001
Polr2i	2.63092	3.22189	13.6933	0.000215219	0.0158001
Klhl25	1.85127	5.2575	13.539	0.000233651	0.0165708
Sccpdh	4.33411	2.25598	13.5075	0.000237611	0.0167415
Ccnb2	2.00971	5.99695	13.4851	0.000240471	0.016833
Junb	3.14822	3.98214	13.4588	0.000243859	0.0168925
Dohh	3.63862	1.70553	13.4542	0.000244455	0.0168925
Ndrg2	-3.74875	4.63838	13.4356	0.000246891	0.0169521
Abcb10	2.28874	5.1883	13.4209	0.000248843	0.016978
Spc24	2.84716	4.01809	13.3901	0.000252953	0.0171499
Tex14	5.8763	1.38068	13.3591	0.000257176	0.0173272
Rpl37rt	2.02136	3.19764	13.2691	0.000269818	0.0180661
Gm4070	2.69858	6.51836	13.186	0.000282042	0.0186349
Clspn	5.90362	2.26914	13.1843	0.000282304	0.0186349
af1	1.82287	7.49893	13.1764	0.0002835	0.0186349
Rtl8c	-7.71633	1.84329	13.1484	0.000287767	0.0188008
mt.Cytb	-2.407	9.73913	13.1088	0.000293912	0.0189744
Marcksl1	2.37124	4.99352	13.1086	0.000293946	0.0189744
F9	-9.67523	1.80397	13.0653	0.000300818	0.0191007
Gas2l3	5.28994	0.9983	13.082	0.000298146	0.0191007
Hmbs	3.33471	8.81497	13.0628	0.000301217	0.0191007
Birc2	-2.11482	6.73642	13.032	0.000306218	0.0193043
Miat	7.89073	2.45849	12.9686	0.000316763	0.0197884
Bend4	-3.30924	2.17888	12.954	0.000319238	0.0197884
F830016B08Rik	8.16388	1.97847	12.953	0.000319405	0.0197884
Bak1	2.04132	5.16563	12.9187	0.00032532	0.020005
Retsat	-5.00685	2.80586	12.9054	0.000327643	0.020005
Fbxw17	3.22855	3.34947	12.9007	0.000328467	0.020005
Slc16a1	2.2737	6.0933	12.8642	0.000334926	0.0202837
Gm4841	4.79465	4.11801	12.8485	0.000337751	0.0203405
Dmac1	-1.57307	4.49302	12.806	0.000345506	0.0205777
Tmub2	1.65871	3.89957	12.8104	0.000344697	0.0205777
Ptges	6.00777	1.8955	12.7737	0.000351519	0.0208207
Ifih1	1.74929	6.26594	12.725	0.000360791	0.0212183
Rsad1	-7.66387	1.42011	12.7164	0.000362456	0.0212183
Atp6v1e1	1.4803	7.19454	12.7078	0.000364136	0.0212183
Pilrb1	1.32702	5.64348	12.6797	0.00036964	0.0212443
Gm30948	-5.19301	1.88735	12.6754	0.000370495	0.0212443
Trem1	2.1229	6.10704	12.6799	0.000369598	0.0212443
Kif4	4.20804	3.9287	12.6636	0.000372835	0.0212654
Kntc1	3.58344	2.9025	12.6285	0.000379913	0.0213305
Fam45a	-2.08695	4.92059	12.6471	0.000376152	0.0213305
Dctn3	1.56284	5.08785	12.6328	0.000379047	0.0213305
Cebpb	2.23656	2.95973	12.5812	0.00038965	0.0217639
Tox	-7.10334	1.24869	12.55	0.00039621	0.0220001
Crebrf	-1.34062	6.24425	12.5417	0.00039796	0.0220001
Prrc2c	-1.42223	5.52635	12.5244	0.000401662	0.0220914
Oas3	2.13389	7.1238	12.5034	0.000406206	0.0222279
Lig1	2.48459	3.88053	12.4857	0.000410081	0.0222584
Pigr	-10.8877	2.89378	12.482	0.000410893	0.0222584
Slc12a6	-1.20116	6.52524	12.3991	0.000429544	0.0231524
Cpsf6	-1.08526	5.4468	12.3667	0.00043705	0.0234398
5830428M24Rik	-2.06515	3.08346	12.3447	0.000442251	0.0235114
Wwp2	1.69683	6.79965	12.3243	0.000447108	0.0235114
Flot1	1.32932	5.45615	12.3294	0.000445878	0.0235114
Cdc20b	6.79752	0.719078	12.3307	0.000445576	0.0235114
po7	3.55127	9.81585	12.2734	0.000459461	0.0240436
Sapcd2	6.29416	1.25756	12.2468	0.000466045	0.0242704
Ifi27	2.05802	8.30565	12.2213	0.00047247	0.0244867
Kif9	-3.19315	2.49717	12.1644	0.000487116	0.0248161
Gsap	1.46334	6.07619	12.1868	0.000481295	0.0248161
Mvp	1.86162	5.90271	12.1608	0.000488034	0.0248161
Gm36981	6.77594	0.977955	12.1623	0.000487641	0.0248161
Coro1b	1.42906	6.82323	12.1417	0.000493071	0.0249545
Ifng	4.48717	2.78992	12.1151	0.000500145	0.0251942
H2.Q7	1.72713	7.78605	12.0899	0.000506968	0.0254192
Slamf8	2.51584	4.34814	12.0622	0.000514539	0.0256793
Rnf114	2.07559	9.48395	11.9523	0.000545793	0.0257407
Fam110a	5.57833	0.863689	12.0091	0.00052942	0.0257407
Tnfrsf13b	-1.39624	5.57711	11.9477	0.000547163	0.0257407
Fignl1	3.2335	3.65587	11.9922	0.000534227	0.0257407
Gm13012	-4.30378	1.97169	11.9407	0.000549198	0.0257407
Ccny	-1.16648	6.36117	12.0121	0.000528572	0.0257407
Ifi30	1.26883	7.62469	11.972	0.000540067	0.0257407
Zbp1	1.89189	8.3301	11.9762	0.000538855	0.0257407
Commd3	-1.99736	5.01238	11.9543	0.000545206	0.0257407
Scarf1	3.61336	2.54074	11.9438	0.000548297	0.0257407
Pvrig	6.21119	0.941204	11.9664	0.000541676	0.0257407
Chit1	6.82952	0.948343	12.0211	0.000526011	0.0257407
Trf	-7.78636	5.09832	11.9852	0.000536259	0.0257407
Sec14l1	2.04129	4.43534	12.0031	0.000531125	0.0257407
Arhgap6	-3.47148	2.68096	11.915	0.000556823	0.0258746
Uri1	-1.22245	4.70993	11.9001	0.00056132	0.0258746
Kif15	3.35847	3.65523	11.8989	0.000561657	0.0258746
Pilra	1.44134	6.94034	11.9073	0.000559141	0.0258746
Spata13	1.23965	6.12386	11.884	0.000566169	0.0259715
Gvin1	2.44199	6.9701	11.8588	0.000573908	0.026215
Gpld1	-8.81472	1.31695	11.8477	0.000577327	0.0262599
Psmb10	1.87473	6.35858	11.8348	0.000581332	0.0263309
Gm8730	1.67228	3.96764	11.815	0.000587555	0.0265015
Slc24a5	-7.13755	1.27372	11.8049	0.000590762	0.0265351
Serpina3g	1.80538	8.00421	11.7524	0.000607654	0.0271806
Timm10	1.89653	3.28798	11.7315	0.000614495	0.0273729
Tbx21	2.17479	4.70856	11.7032	0.000623938	0.0276792
P2ry12	-3.80061	6.833	11.6601	0.000638557	0.0280965
Gm19705	-3.64335	2.4514	11.6651	0.000636844	0.0280965
Ankle2	-1.19485	5.85947	11.6474	0.000642925	0.0281698
Incenp	1.65833	4.7729	11.6401	0.000645448	0.0281698
Slc16a12	-8.59092	1.57786	11.5878	0.000663872	0.028857
Gm15427	1.87157	3.24401	11.5662	0.000671627	0.0290768
Gm20658	6.60856	0.798452	11.5525	0.000676574	0.0291739
Fgr	1.41397	7.03339	11.5246	0.000686798	0.0294968
Tial1	-2.1315	3.83351	11.5103	0.000692117	0.0296072
Iigp1	2.68227	7.30418	11.4574	0.000712104	0.0303418
Trib1	3.95686	2.17922	11.4382	0.000719479	0.0305354
Top2a	2.89255	6.82054	11.4264	0.000724088	0.0306105
Siglecg	-1.41855	5.62586	11.3734	0.000745018	0.0313527
Zfp873	-2.91344	2.94152	11.3674	0.000747462	0.0313527
Aurkb	3.33195	3.6947	11.3216	0.00076612	0.0314022
BC028528	-1.80547	4.69673	11.3463	0.000755989	0.0314022
Gnmt	-11.4899	3.57676	11.3281	0.000763448	0.0314022
H2.T.ps	2.64935	2.66468	11.3249	0.000764729	0.0314022
Urod	3.4122	8.76639	11.338	0.000759359	0.0314022
Bnip3	-2.52147	3.81349	11.3377	0.000759475	0.0314022
Oas1a	1.79662	7.18256	11.2961	0.000776701	0.0317153
Ndufa11	1.94	5.68779	11.2862	0.000780848	0.0317643
Map3k19	-4.00603	2.2859	11.2356	0.000802435	0.0323979
Fmo5	-4.40408	2.8328	11.2398	0.000800614	0.0323979
Ing1	-1.16239	5.134	11.2266	0.000806346	0.0324344
Foxred1	-1.32978	4.96603	11.1862	0.000824074	0.0327929
Aunip	6.08809	1.294	11.195	0.000820178	0.0327929
Pkp3	1.87931	5.05834	11.1855	0.000824386	0.0327929
H2.Q10	-3.25404	6.27793	11.1677	0.000832324	0.032987
Bend6	6.45962	0.849084	11.1451	0.000842542	0.0332696
Fitm2	-4.16272	2.01082	11.101	0.000862789	0.0338213
Crip1	1.76318	8.39563	11.1061	0.000860465	0.0338213
Bcl2a1b	2.17308	1.94921	11.0857	0.00086994	0.0339781
Isg15	3.18185	10.7965	11.0515	0.000886176	0.0343547
Coro1c	1.44267	5.07533	11.0514	0.000886197	0.0343547
Tmem97	-3.54656	2.80386	11.0453	0.000889143	0.0343547
Jun	2.20117	3.73239	11.0223	0.000900207	0.034658
Ptpa	1.92786	5.95946	11.0153	0.000903608	0.0346651
Osbpl3	2.06356	4.48783	10.9889	0.000916598	0.0350388
Bax	1.56711	4.49278	10.9553	0.000933351	0.0355531
Clec5a	2.06385	4.75724	10.9423	0.000939951	0.0356784
Agpat1	2.89442	1.99749	10.93	0.000946216	0.0357902
Cdca8	3.16244	3.48027	10.921	0.0009508	0.0357963
Ifrd2	2.44786	5.89343	10.9167	0.00095302	0.0357963
Fam72a	5.06475	0.918915	10.8988	0.000962268	0.0360182
Asb13	-1.55272	4.77023	10.846	0.000990111	0.0369322
Usp6nl	-1.63798	4.06718	10.8215	0.00100329	0.0370772
Cyba	1.6128	7.83424	10.8202	0.00100396	0.0370772
Afap1l1	-3.69005	3.17492	10.8133	0.00100776	0.0370772
Txndc16	-1.33873	5.5391	10.8169	0.00100577	0.0370772
Tbc1d2b	1.26194	6.23768	10.7982	0.00101598	0.0371264
Psme2	1.26154	8.05169	10.8019	0.00101395	0.0371264
Emp3	1.37829	6.54861	10.78	0.00102605	0.0373677
Gm16104	5.37539	1.37249	10.7722	0.00103038	0.0373989
Pbld1	-8.78609	1.44122	10.764	0.00103492	0.0374377
Gm38414	-8.38229	1.45569	10.7431	0.00104668	0.0374859
Bad	1.92128	3.41166	10.7432	0.00104665	0.0374859
Stra6l	-8.83384	1.37477	10.7534	0.00104091	0.0374859
Zfp101	-1.91378	4.08977	10.6941	0.00107476	0.0381116
Ighg3	4.53787	2.5589	10.6999	0.00107141	0.0381116
Gm17655	3.94584	2.54218	10.6987	0.00107211	0.0381116
Eno3	1.91579	5.56732	10.658	0.00109596	0.0384292
Coq8a	-1.7588	3.78622	10.6657	0.00109141	0.0384292
Med16	2.59814	2.3393	10.6512	0.00109998	0.0384292
Phf11a	2.74091	5.33059	10.6492	0.00110116	0.0384292
Gm28609	-4.33711	2.7782	10.6486	0.00110154	0.0384292
Smpd1	-1.96307	3.84127	10.6078	0.00112613	0.0391601
Rnf170	-1.59276	3.87363	10.5832	0.00114122	0.0394881
Dyrk3	3.76244	4.93251	10.5803	0.00114299	0.0394881
Asb6	2.94	2.79372	10.5746	0.00114655	0.0394881
Atp5g2	1.50729	5.29406	10.5478	0.00116329	0.0398104
Cox5a	-1.88242	7.22792	10.5511	0.00116117	0.0398104
Ces1d	-7.33502	2.38618	10.5344	0.00117176	0.0398974
Siva1	1.96937	3.0124	10.532	0.00117324	0.0398974
Slc43a3	1.95665	4.42361	10.5119	0.00118608	0.0400854
Cd55	-1.53588	7.05473	10.5117	0.0011862	0.0400854
Mastl	4.92613	1.92301	10.5037	0.00119136	0.040134
Fbxo34	2.25351	3.75828	10.4688	0.0012141	0.0406459
Gtdc1	-1.4961	4.37629	10.472	0.00121196	0.0406459
Kmo	-1.65783	5.72602	10.4614	0.00121894	0.0406817
Clec4n	2.01742	4.43668	10.4425	0.00123151	0.0408166
Dip2c	-7.0711	1.46376	10.4422	0.00123165	0.0408166
Hmgcs2	-12.0749	3.81076	10.4374	0.00123489	0.0408166
Mafg	1.36349	4.70447	10.4326	0.00123813	0.0408166
Natd1	3.53965	1.81184	10.4207	0.00124614	0.0409554
Col18a1	-9.38782	1.89435	10.403	0.00125811	0.0409919
Zdhhc2	5.37761	2.02019	10.4022	0.00125866	0.0409919
Bid	-1.53202	4.59022	10.4055	0.00125643	0.0409919
2310011J03Rik	1.55033	4.31397	10.3822	0.00127235	0.0413129
Sdr42e1	-4.872	1.72536	10.3625	0.00128601	0.0415625
Ighg2c	7.98393	5.6033	10.36	0.00128774	0.0415625
Itgal	1.22017	6.519	10.3299	0.00130891	0.0421174
Rasa4	1.84555	3.87743	10.3182	0.00131726	0.0421174
Gbp6	1.66898	5.47322	10.3136	0.00132056	0.0421174
Slc15a3	1.98143	4.55065	10.3214	0.00131497	0.0421174
Nufip1	-1.49672	4.12735	10.2887	0.00133848	0.0423508
Kif24	5.4436	1.18504	10.2871	0.00133967	0.0423508
Ccr5	2.21687	4.69681	10.2948	0.00133405	0.0423508
Gfra1	-8.49174	1.25191	10.2814	0.00134375	0.0423555
Otub2	1.91273	4.40812	10.2421	0.00137268	0.0431413
Bbs9	-2.24755	3.71277	10.226	0.00138478	0.0432732
Gcc2	-1.56067	4.20879	10.2112	0.00139591	0.0432732
Brip1	3.54234	2.8059	10.2223	0.00138751	0.0432732
Ccl5	2.61761	6.59778	10.2098	0.00139694	0.0432732
Selenop	-1.7681	8.40526	10.2189	0.00139012	0.0432732
Narf	2.06715	6.24663	10.1695	0.00142783	0.0440733
Slc36a3os	4.21385	1.92431	10.1652	0.00143117	0.0440733
Ccdc92b	4.11217	2.90632	10.1602	0.00143504	0.0440733
Psmb9	1.45284	6.86455	10.1523	0.00144119	0.0441366
Aaed1	-1.41567	5.02247	10.1288	0.00145974	0.0443377
Scd1	-1.68169	7.5121	10.1235	0.00146389	0.0443377
Phyh	-1.6048	5.93705	10.1281	0.00146022	0.0443377
Glyctk	-3.60454	2.46724	10.1231	0.00146421	0.0443377
Zcchc4	-1.63858	3.6211	10.1114	0.00147353	0.0444949
Rbbp9	-2.96582	2.31389	10.0965	0.00148553	0.0447319
Akap8	-1.11643	6.5281	10.0723	0.00150518	0.0451973
Nacad	7.16048	3.19403	10.0598	0.00151536	0.0453731
Nkg7	2.28445	6.39075	10.0549	0.00151945	0.0453731
Itgax	1.69486	5.64658	10.0461	0.00152669	0.0454633
Lipt1	-6.04849	1.36681	10.0384	0.00153308	0.0455279
Bspry	4.53723	1.98788	10.0238	0.00154532	0.0457653
Emilin1	3.23225	2.90683	10.0024	0.00156338	0.0459244
Jmjd1c	-1.27397	5.69978	10.0023	0.00156348	0.0459244
Plk3	4.40984	1.94507	10.0095	0.00155737	0.0459244
Gm18853	2.83516	3.54057	9.9672	0.00159354	0.046573
Ythdc1	-1.56711	4.69181	9.96644	0.0015942	0.046573
Ctsg	6.04021	0.733851	9.94792	0.00161032	0.0467224
Oas1b	2.0122	3.75329	9.94563	0.00161231	0.0467224
Sema5a	-6.92644	0.391545	9.95021	0.00160831	0.0467224
Jund	2.00265	2.867	9.92582	0.00162976	0.0471014
Hacd4	-2.17274	7.52023	9.89035	0.00166147	0.0471567
A130071D04Rik	-6.8767	1.11876	9.89307	0.00165902	0.0471567
4932443I19Rik	-6.70328	1.04338	9.88944	0.0016623	0.0471567
Iglc3	-1.71168	6.50018	9.91171	0.00164231	0.0471567
Aldh4a1	-3.10231	2.99402	9.91287	0.00164127	0.0471567
Hcls1	1.21421	7.74327	9.90721	0.00164632	0.0471567
Arhgap19	2.99304	2.96564	9.89924	0.00165347	0.0471567
Tmem158	-4.3938	2.56368	9.86775	0.00168201	0.0475908
Isyna1	1.84357	4.06364	9.86181	0.00168745	0.0476196
Stmn1	2.30526	5.58048	9.85315	0.00169541	0.0476515
Itgb2l	4.24261	3.87743	9.85023	0.0016981	0.0476515
Edf1	1.54546	6.06515	9.84619	0.00170184	0.0476515
Tapbpl	1.4338	5.34981	9.83961	0.00170794	0.0476984
Wdr13	-1.75196	5.81744	9.82402	0.00172248	0.0479801
Sars	1.12848	6.8783	9.81866	0.0017275	0.0479961
Prdx3	1.53814	7.18229	9.80429	0.00174105	0.0481244
Pask	5.07203	1.27503	9.80828	0.00173728	0.0481244
Pgap1	-1.72399	5.31143	9.76053	0.00178299	0.0490726
Rex1bd	2.39463	3.06824	9.75901	0.00178446	0.0490726
1500009L16Rik	5.59497	2.09057	9.70806	0.00183462	0.0500688
Slc37a1	2.38409	2.6233	9.70957	0.00183311	0.0500688
Tgtp2	1.66659	9.01547	9.71671	0.001826	0.0500688
Amd1	-1.27716	6.1164	9.69233	0.00185039	0.0503716
Decr1	-2.36321	4.3958	9.67153	0.00187146	0.0505088
Slc8b1	1.8964	4.08102	9.67307	0.00186989	0.0505088
Lipc	-4.43821	2.86852	9.66887	0.00187417	0.0505088
Ephx1	-1.27639	5.15069	9.67117	0.00187182	0.0505088
Mttp	-8.5279	1.4167	9.63895	0.00190494	0.050956
Metrnl	1.61457	4.86124	9.64569	0.00189796	0.050956
Sephs2	-1.26955	6.35983	9.63989	0.00190396	0.050956
Upb1	-4.1919	2.32142	9.62029	0.0019244	0.051349
Prelid3b	1.28934	4.9201	9.60728	0.00193808	0.0515864
Use1	1.15387	6.59771	9.5822	0.00196473	0.052167
Sqstm1	1.74501	9.03148	9.5504	0.00199906	0.0529481
Txndc15	-1.63392	4.31302	9.5238	0.00202824	0.0533758
Ofd1	-1.99799	3.67754	9.52215	0.00203006	0.0533758
Ppp2r1b	1.42463	4.72387	9.52755	0.0020241	0.0533758
Neurl1b	4.98962	1.02577	9.50255	0.00205187	0.0538178
Rpa2	1.52263	5.5374	9.47795	0.00207957	0.0544119
Myo1f	1.27799	7.15885	9.46439	0.00209499	0.0546827
Apoh	-13.2652	4.92945	9.43359	0.00213047	0.0547642
D730003I15Rik	-3.63413	1.53394	9.44922	0.00211239	0.0547642
Acpp	-3.03643	3.06348	9.43084	0.00213367	0.0547642
Eif2ak1	2.22525	6.38211	9.4311	0.00213336	0.0547642
Socs3	1.77772	5.19067	9.43147	0.00213293	0.0547642
Cpe	-3.91259	2.17817	9.44787	0.00211394	0.0547642
Cd200	-1.68484	3.62799	9.44728	0.00211462	0.0547642
Afmid	3.34722	1.47028	9.39247	0.00217878	0.0553979
Gm36161	1.33242	5.11566	9.39236	0.00217892	0.0553979
Fkbp3	-1.3217	6.16544	9.40069	0.00216903	0.0553979
Ncapd2	1.82313	4.95377	9.39957	0.00217036	0.0553979
Hspa9	-1.03176	6.82601	9.37388	0.00220099	0.0558274
Abhd14b	-4.02239	2.44755	9.30895	0.00228038	0.05697
Aldh16a1	1.7528	4.31036	9.30822	0.00228127	0.05697
Fam167a	-3.59263	1.49055	9.30749	0.0022822	0.05697
BC043934	-2.99566	2.43309	9.31161	0.00227706	0.05697
Adh1	-9.0532	5.10205	9.30682	0.00228303	0.05697
Fuom	-7.25916	0.933301	9.32918	0.00225533	0.05697
Cyfip1	1.30637	6.02388	9.32046	0.00226609	0.05697
Ighv1.76	-5.92539	0.989715	9.29864	0.00229324	0.0570926
Ccdc150	-6.7026	1.4733	9.28972	0.00230444	0.0572393
Lamc1	1.86264	2.80999	9.22586	0.00238621	0.0589984
Pigq	1.79475	6.49017	9.22982	0.00238105	0.0589984
C530050E15Rik	-4.37926	2.49025	9.19439	0.00242757	0.0592091
Wars	1.71713	5.49878	9.19431	0.00242768	0.0592091
Haus3	-1.63588	4.60066	9.20453	0.00241417	0.0592091
Hist1h4c	-5.11641	3.50315	9.20913	0.00240811	0.0592091
Platr17	-5.93912	1.54155	9.20894	0.00240836	0.0592091
Arhgap29	-3.51277	3.01148	9.20193	0.0024176	0.0592091
Treml4	2.26279	5.59968	9.16237	0.00247043	0.0600881
Tfpi	-6.97877	1.88776	9.15908	0.00247487	0.0600881
Gemin8	-7.09562	1.10222	9.14959	0.00248774	0.0602647
Cln8	2.04658	5.57429	9.1281	0.00251713	0.0603022
Galm	-3.02996	2.62496	9.13327	0.00251002	0.0603022
Gys1	4.35529	1.41134	9.12395	0.00252285	0.0603022
Igtp	1.39667	8.99831	9.14133	0.002499	0.0603022
Mthfd1l	1.39865	4.50988	9.13494	0.00250773	0.0603022
Ephx2	-11.76	3.47685	9.12663	0.00251916	0.0603022
Fkbp8	1.53348	7.59497	9.11658	0.00253303	0.0604117
Rag1	8.37733	5.4339	9.10932	0.00254311	0.060518
Zfp324	-2.63584	2.40132	9.08612	0.00257557	0.0610414
Trappc6a	1.81894	3.58518	9.06951	0.00259907	0.0610414
Ksr1	3.5741	1.39433	9.0853	0.00257673	0.0610414
Cmah	-1.20942	6.56864	9.07303	0.00259408	0.0610414
Tsen2	-3.87904	1.37398	9.06984	0.0025986	0.0610414
Mmel1	5.45659	2.12056	9.0719	0.00259567	0.0610414
Pcca	-2.81278	3.0682	9.05343	0.00262203	0.0613134
E230001N04Rik	-6.02442	0.971812	9.05424	0.00262087	0.0613134
Slf2	-1.48476	4.40198	9.04668	0.00263172	0.0614068
Cdkn2d	1.16584	5.9416	9.03107	0.00265429	0.0617996
Gadd45g	2.76028	2.52424	9.02487	0.00266331	0.0618761
Tap1	1.21847	7.48038	9.01325	0.00268029	0.0620033
Ss18l1	-3.62301	2.01519	9.01415	0.00267897	0.0620033
Cdca2	3.03425	3.16646	9.00775	0.00268837	0.0620569
Asns	3.73694	5.23449	8.99645	0.00270504	0.0623084
Gm17344	3.40599	2.69653	8.97539	0.00273641	0.0628965
Casp12	4.85949	1.91014	8.967	0.00274899	0.0630513
Batf	1.86143	4.64964	8.95911	0.00276089	0.0631898
A630023P12Rik	-2.42093	3.11751	8.9385	0.00279222	0.0637715
Ube2cbp	-4.15648	1.23771	8.93279	0.00280096	0.0638359
Ibtk	1.5257	7.29109	8.92697	0.0028099	0.0639044
Psmb5	1.54825	5.15185	8.9197	0.00282111	0.0640244
Abca1	-1.60907	4.57182	8.91564	0.00282739	0.064032
Ghr	-9.48039	1.99031	8.8904	0.00286674	0.064787
Grcc10	-3.19348	1.67564	8.87801	0.00288626	0.0650918
Ankrd26	-3.61892	2.08318	8.86261	0.00291071	0.065394
Metap1d	-1.78141	3.91172	8.86081	0.00291359	0.065394
Aldh1l1	-6.7278	4.05208	8.8513	0.0029288	0.065394
Slc27a2	-6.05354	2.74187	8.85066	0.00292984	0.065394
Szrd1	1.1944	5.13562	8.85056	0.00292999	0.065394
Ube2e1	-1.44354	4.47398	8.83749	0.00295105	0.065728
Rnase4	-3.41581	4.52153	8.82766	0.00296698	0.0658976
Slc3a2	1.73241	7.66829	8.82526	0.00297089	0.0658976
Phldb1	4.87421	0.671106	8.8137	0.00298977	0.0661801
4930599N23Rik	5.45551	1.43951	8.80967	0.00299638	0.0661904
R3hdm1	-1.31748	4.60148	8.78798	0.00303222	0.0662029
Pde7a	-1.26121	6.01361	8.7974	0.0030166	0.0662029
Nudt7	-1.98872	3.58458	8.79512	0.00302038	0.0662029
St3gal2	2.18301	4.71839	8.78704	0.00303379	0.0662029
Ncapg	2.20281	4.27807	8.80338	0.00300673	0.0662029
Dpt	5.25065	1.74906	8.78998	0.0030289	0.0662029
Hspb8	-8.78713	2.03114	8.78111	0.00304366	0.0662842
Adipoq	5.68222	1.14374	8.77373	0.003056	0.0664031
Pprc1	-4.26638	1.50259	8.77049	0.00306144	0.0664031
I830127L07Rik	1.43168	6.58399	8.75653	0.00308496	0.0667788
Retreg1	-1.15699	5.65241	8.74663	0.00310174	0.0668758
Bud31	1.13764	6.8339	8.74293	0.00310805	0.0668758
Gsta4	-5.82818	1.86191	8.74633	0.00310225	0.0668758
Cmklr1	3.26814	1.66068	8.72576	0.00313745	0.0672399
Hfe2	-8.0357	2.2512	8.7259	0.00313722	0.0672399
Epb41l4b	-8.57125	1.0876	8.71538	0.00315537	0.0674899
Dcxr	-2.94912	3.04849	8.70796	0.00316824	0.0676309
Myo1g	1.33024	7.19929	8.69945	0.00318306	0.0678131
Bambi	4.38917	0.842144	8.67862	0.00321966	0.0684574
Mxd3	3.78392	2.20607	8.66048	0.00325186	0.0690059
kr6	-3.78072	2.12671	8.65247	0.00326618	0.0691738
Cacna1e	-1.70475	4.18384	8.64728	0.0032755	0.0692352
Setx	-1.00463	6.16419	8.6403	0.00328807	0.0693647
Sgo2a	4.59541	2.49477	8.63253	0.00330212	0.0695252
Gm11827	6.28495	0.439405	8.62565	0.00331463	0.0695625
A230050P20Rik	-2.495	2.00651	8.62445	0.0033168	0.0695625
Nkain4	5.58396	1.14449	8.61611	0.00333203	0.069611
Zfp273	-3.56106	2.35785	8.61635	0.00333159	0.069611
Slc40a1	-1.87897	5.54402	8.60117	0.00335948	0.0700487
Matr3	-1.02337	7.00915	8.5899	0.00338033	0.0702773
Egfr	-9.57638	1.84338	8.57198	0.00341376	0.0702773
Sardh	-4.81472	3.42116	8.57572	0.00340675	0.0702773
Gbp5	2.69466	5.71325	8.58242	0.00339424	0.0702773
Atp10a	1.65718	4.46621	8.56627	0.00342449	0.0702773
Rpl36	1.73517	6.53919	8.56626	0.00342449	0.0702773
Pnp2	3.36177	3.90877	8.58702	0.00338567	0.0702773
Gstz1	-3.28321	4.20221	8.56758	0.00342201	0.0702773
Rnf138	-1.53906	5.00978	8.56381	0.00342912	0.0702773
Baiap3	2.27282	4.39114	8.55273	0.00345005	0.0705721
Ehd1	1.58646	6.24076	8.53633	0.00348128	0.0709417
Fmo1	-8.81111	1.76401	8.5394	0.00347539	0.0709417
Nkiras2	1.56448	4.53455	8.53162	0.00349029	0.0709912
Fam212a	2.55871	2.81056	8.52313	0.0035066	0.0711886
Nfkbia	1.13741	5.63741	8.496	0.00355929	0.071996
Spp1	6.02935	2.72201	8.49577	0.00355973	0.071996
Wasl	-1.77448	3.21497	8.48816	0.00357465	0.0720169
Fyn	1.10445	6.12504	8.48503	0.0035808	0.0720169
St8sia4	-1.29609	6.0802	8.48721	0.00357653	0.0720169
Rfx2	2.23485	3.54444	8.4731	0.00360436	0.0723139
Ptprcap	1.18251	6.0382	8.47021	0.0036101	0.0723139
Prkcz	-2.06021	2.11935	8.46739	0.0036157	0.0723139
Chpt1	-2.42414	3.77867	8.45921	0.00363199	0.0724489
Ahcy	-1.94603	5.31083	8.45507	0.00364026	0.0724489
Bicd1	-6.59597	0.845285	8.4539	0.00364261	0.0724489
Cd81	-1.34604	6.19063	8.43608	0.00367848	0.0727633
Noc4l	2.70733	2.21329	8.43599	0.00367866	0.0727633
Dlg3	-5.14276	1.45434	8.43985	0.00367087	0.0727633
Dhx34	2.31182	2.30599	8.41776	0.00371574	0.0729905
Map3k3	-1.3836	5.00843	8.42477	0.00370143	0.0729905
Rps27	-1.33865	10.5186	8.41784	0.00371556	0.0729905
Necap2	1.34526	6.63658	8.41703	0.00371723	0.0729905
Nat8f1	-3.41266	2.10625	8.4061	0.00373965	0.0731641
Gm36551	4.13838	1.65874	8.40872	0.00373425	0.0731641
Tnip3	2.66439	2.54175	8.39592	0.00376065	0.0732996
Gmds	3.38774	2.30046	8.39286	0.00376698	0.0732996
Ttpal	-0.972103	6.30895	8.39676	0.00375891	0.0732996
Pld2	3.89956	1.24824	8.36888	0.00381701	0.0741395
Nfx1	-1.0257	5.73305	8.36084	0.00383393	0.0743341
Gzmk	4.77454	5.55918	8.34847	0.00386012	0.0743552
Ighv1.75	-3.06456	1.41447	8.34082	0.00387641	0.0743552
Tmem123	-1.19423	7.77525	8.35582	0.00384453	0.0743552
Tmed8	-1.24317	5.23728	8.34867	0.00385971	0.0743552
Dennd2d	-1.18992	6.03922	8.34202	0.00387385	0.0743552
Smo	-6.43527	1.47517	8.34228	0.0038733	0.0743552
Klra5	-6.22807	0.906375	8.33491	0.00388905	0.0744653
Ehbp1l1	1.26099	6.10748	8.33154	0.00389625	0.0744709
Dapk2	2.54442	6.00084	8.30875	0.00394545	0.0751687
Ptprv	-5.65399	1.13014	8.30318	0.00395757	0.0751687
Prdx6	-1.33578	8.52171	8.30229	0.00395951	0.0751687
Klrc1	1.60702	5.15218	8.30177	0.00396065	0.0751687
Pctp	-1.67252	4.00653	8.29476	0.00397596	0.0753266
Cutc	-1.85442	3.60939	8.28538	0.00399655	0.0754849
Gnb5	-3.36636	1.30578	8.28458	0.00399832	0.0754849
Igf2bp3	4.2034	1.64756	8.27543	0.00401851	0.0757335
Pank4	-1.19193	4.2446	8.23671	0.00410516	0.0762993
Mtf2	-1.22024	4.7398	8.23785	0.00410257	0.0762993
Mfsd12	2.57202	2.58697	8.23928	0.00409934	0.0762993
Fchsd2	-1.55071	4.74331	8.23725	0.00410392	0.0762993
Cks1b	2.35739	3.76762	8.25688	0.00405979	0.0762993
1110004F10Rik	-1.02134	6.12814	8.24855	0.00407845	0.0762993
Hells	2.19176	3.85997	8.24515	0.0040861	0.0762993
Mlkl	2.15022	3.91711	8.2554	0.00406309	0.0762993
Rgs10	-1.80776	8.08121	8.22705	0.00412706	0.0765743
Slc8a1	3.57957	1.7121	8.22371	0.00413466	0.0765836
Tspo	1.52991	7.5785	8.2053	0.00417682	0.0770996
Gm29264	5.06273	0.381708	8.20798	0.00417065	0.0770996
Eef1akmt1	1.37054	4.07441	8.20081	0.00418717	0.0771585
Zfp961	-1.55436	3.99464	8.18864	0.00421536	0.0772053
Zfp36l2	-1.51031	6.20617	8.18722	0.00421866	0.0772053
Pts	-0.933651	6.20898	8.1812	0.00423268	0.0772053
Maob	-9.21944	1.66799	8.18766	0.00421763	0.0772053
Inmt	-10.8328	3.96887	8.18197	0.00423087	0.0772053
S100a1	-1.5306	6.38529	8.18317	0.00422807	0.0772053
Cyp27a1	-1.95747	4.51541	8.16931	0.0042605	0.0775815
Lypla2	1.45774	4.95563	8.1416	0.0043261	0.0780057
Cxcl10	3.75688	4.79069	8.15137	0.00430287	0.0780057
Ighd	-1.28601	7.02925	8.14225	0.00432457	0.0780057
Atg3	-1.02656	5.89994	8.14984	0.0043065	0.0780057
Ifitm2	1.40314	4.27152	8.14527	0.00431736	0.0780057
Sbno2	1.58735	5.04299	8.13811	0.00433445	0.0780057
Arpc1b	1.29346	8.50729	8.1399	0.00433016	0.0780057
Sdhaf3	-4.7824	1.18115	8.11428	0.00439179	0.0789058
Serpinf1	-10.4504	2.57489	8.10893	0.00440478	0.0790075
Nme6	-2.79573	2.61249	8.10171	0.00442236	0.0790976
Rpl36a	-1.32906	8.23045	8.10079	0.00442459	0.0790976
Ube2g2	1.37957	4.88791	8.09784	0.00443181	0.0790976
Dusp5	1.68493	4.13174	8.08233	0.00446989	0.0792524
Slc2a8	3.53693	1.24649	8.08714	0.00445804	0.0792524
Polg2	-2.06948	3.27162	8.08289	0.00446852	0.0792524
Rps27rt	-1.89014	2.52437	8.08846	0.00445481	0.0792524
Fbxo11	-1.32821	4.84594	8.07346	0.00449183	0.0795105
Gm12715	2.65415	1.90981	8.06281	0.00451831	0.0798482
Gamt	-5.1429	1.88639	8.04355	0.00456659	0.0805694
Arhgef10l	2.10286	4.11012	8.01422	0.00464114	0.0817507
Jpt1	1.43803	8.17243	8.00579	0.00466281	0.0819985
Exosc9	1.226	5.26407	8.00152	0.00467381	0.0820582
Gria3	-6.37777	0.791402	7.99774	0.00468358	0.082096
Il5ra	-1.73612	4.18037	7.9882	0.00470831	0.0823954
Cdh1	-3.52969	1.31876	7.98438	0.00471827	0.0824359
3110002H16Rik	1.59149	7.00833	7.96953	0.00475712	0.0826554
Igfbp4	-2.83504	5.28248	7.96628	0.00476567	0.0826554
Ttll4	-1.73104	3.95124	7.96932	0.00475769	0.0826554
Foxm1	4.74064	0.962714	7.96495	0.00476917	0.0826554
Cdk1	3.51456	4.69288	7.97447	0.00474415	0.0826554
App	1.63844	6.40683	7.95761	0.00478857	0.0828584
Smim4	2.30666	5.07827	7.9496	0.0048098	0.0830924
Cdc6	3.12427	3.25491	7.94427	0.004824	0.0832043
Spag1	3.68339	1.54071	7.93779	0.00484129	0.0832467
Lmna	1.96008	4.76013	7.93681	0.00484391	0.0832467
Redrum	2.96223	4.74633	7.93427	0.00485071	0.0832467
Adap1	1.74258	4.14641	7.9318	0.00485735	0.0832467
Hook1	-2.67367	2.92618	7.91602	0.00489988	0.0837253
Ticrr	4.22681	0.64812	7.91568	0.0049008	0.0837253
Lsm4	1.09644	5.09897	7.90968	0.0049171	0.0838709
Kyat3	-5.1671	2.5482	7.90373	0.00493328	0.0840139
2006-03-01	-1.05985	5.68692	7.88822	0.00497578	0.0844954
Ulk1	1.75621	3.93597	7.88769	0.00497723	0.0844954
Hsd17b12	1.11193	5.12481	7.8809	0.00499595	0.0846369
Sh3bp5l	1.50719	3.92704	7.87898	0.00500127	0.0846369
Hpgd	-3.22645	3.58829	7.8729	0.00501812	0.084789
Thap6	-1.95186	2.7912	7.86659	0.00503564	0.0849518
6330403K07Rik	4.38087	0.921995	7.85604	0.00506511	0.0853154
Nmt1	0.896131	6.7448	7.84866	0.00508584	0.085531
Ly6c2	1.44921	9.31324	7.84364	0.00509997	0.0856351
Smim14	-1.272	6.38936	7.83755	0.00511719	0.0857905
Dnajb13	-5.87246	1.21675	7.82062	0.00516535	0.0861958
Ddah1	-8.3508	1.10129	7.82294	0.00515873	0.0861958
Igf1	-11.8082	3.64573	7.82613	0.00514964	0.0861958
Ppp1r15a	2.63243	7.64373	7.80956	0.00519705	0.0864802
Ifi205	2.22627	5.61779	7.80893	0.00519886	0.0864802
Abcd3	-1.99091	4.20612	7.80629	0.00520646	0.0864802
Sema4a	1.4905	5.02497	7.79655	0.0052346	0.0868138
Nlk	-1.5984	5.36715	7.78505	0.00526802	0.087035
Tmcc2	3.40376	8.76613	7.78709	0.00526208	0.087035
Card6	-1.50876	4.03157	7.78364	0.00527216	0.087035
Cd84	-1.34366	8.06248	7.76558	0.00532512	0.0877748
Sntb1	-1.99813	2.7609	7.76124	0.00533793	0.0877934
Tkt	1.1741	7.48775	7.75693	0.00535067	0.0877934
Aars	1.24351	5.97975	7.75914	0.00534415	0.0877934
Usp24	-1.03657	5.29137	7.74805	0.00537705	0.0878955
Ccdc124	1.75456	3.73461	7.7424	0.00539391	0.0878955
9530082P21Rik	-5.77032	1.95488	7.75036	0.00537017	0.0878955
Hadh	-1.89693	3.97074	7.74114	0.00539767	0.0878955
Zdhhc17	-1.47631	3.85073	7.74296	0.00539225	0.0878955
S100pbp	-1.64705	3.38995	7.73451	0.00541754	0.0879043
mt.Nd4	-1.89695	8.83484	7.73463	0.00541716	0.0879043
Higd2a	1.299	5.19436	7.7328	0.00542267	0.0879043
Raly	1.3943	8.60478	7.72553	0.00544453	0.0881262
Atp11a	1.57358	3.96073	7.71863	0.00546538	0.088331
Tmsb10	1.16378	7.09494	7.71197	0.00548557	0.0885247
Gm18852	3.17616	3.13029	7.70311	0.00551256	0.0888272
Cd300e	2.14457	5.3815	7.69139	0.00554849	0.0892727
Bub1b	2.59979	4.42168	7.68227	0.00557659	0.0895911
Nfkb2	1.35566	4.78163	7.67599	0.00559604	0.0896364
Simc1	-2.62818	2.5688	7.67732	0.0055919	0.0896364
Gcsh	-2.14145	3.80218	7.66654	0.00562542	0.0898728
Abcc3	-2.8964	2.49459	7.66588	0.00562747	0.0898728
Ogfod3	-2.7367	1.72843	7.66321	0.00563582	0.0898729
Cdh23	-4.36397	1.52335	7.63819	0.00571453	0.0909935
Tk1	2.28453	3.86808	7.6347	0.00572558	0.091035
Rap1gap2	1.41558	5.76356	7.62482	0.00575704	0.0914005
Fcrl1	-1.19214	6.27179	7.61967	0.00577349	0.091436
Lin28a	4.65241	0.805422	7.61643	0.00578389	0.091436
1110032A03Rik	-1.99436	5.66352	7.61617	0.00578473	0.091436
Tpgs1	2.26105	1.98883	7.61213	0.00579768	0.0915066
Itgb2	1.13883	7.71248	7.59649	0.00584821	0.0917667
Hax1	1.33008	6.03061	7.59908	0.00583979	0.0917667
Supt4a	1.24572	7.34584	7.59653	0.00584809	0.0917667
Fam129b	2.32488	3.63601	7.59806	0.00584312	0.0917667
Nadk	1.04184	7.99031	7.58553	0.00588385	0.0921918
Zfand6	1.85331	8.80256	7.5729	0.00592523	0.0927053
Relb	1.24906	4.77551	7.56682	0.00594525	0.0928838
Nfe2l2	0.969445	6.36514	7.56397	0.00595466	0.0928961
Yap1	-2.80806	3.79973	7.55775	0.00597526	0.0929951
Rbp1	-6.93477	0.779664	7.55684	0.00597826	0.0929951
Zfp36l1	-1.56235	6.07265	7.5506	0.00599902	0.0930447
Gm5150	-1.23047	4.69749	7.54846	0.00600615	0.0930447
Col4a1	-6.27172	1.59466	7.5481	0.00600734	0.0930447
Glrx	1.71467	5.18407	7.54285	0.00602487	0.0931188
Harbi1	-1.63449	3.02929	7.5415	0.0060294	0.0931188
Anxa7	0.899067	6.65413	7.53574	0.0060487	0.0932833
Rbck1	1.01231	6.11526	7.51518	0.0061181	0.0942188
Itih4	-12.7072	4.27433	7.51055	0.00613386	0.0943268
Lcn2	2.6398	6.40416	7.5032	0.00615895	0.0945777
Cd82	1.59806	7.35673	7.49955	0.00617145	0.0946347
Satb1	-1.61091	5.52928	7.48704	0.00621448	0.0951592
Zfp658	-3.61372	1.97018	7.45363	0.00633086	0.0968038
Hyi	-1.89714	2.45482	7.44091	0.00637578	0.0973075
Dok1	1.158	5.49401	7.43903	0.00638242	0.0973075
Mrpl14	1.83978	3.05126	7.43665	0.00639088	0.0973075
Zfp839	-2.90986	2.21385	7.43327	0.00640289	0.0973528
Cxcl12	-7.96031	0.861212	7.4295	0.00641633	0.0974197
Ctsk	-6.71505	0.759665	7.42606	0.0064286	0.0974688
Gtf2h1	-1.01265	5.37597	7.41322	0.00647465	0.0974814
Scai	-2.20697	3.64467	7.41597	0.00646474	0.0974814
Armc7	1.37582	4.41091	7.41331	0.00647431	0.0974814
Bhlhb9	-2.61757	2.7577	7.41668	0.00646218	0.0974814
Pdcd7	1.57237	3.56813	7.41558	0.00646615	0.0974814
Spata24	2.7858	1.6493	7.40847	0.00649175	0.0976027
Fas	1.26898	5.37465	7.39814	0.00652915	0.0980282
Rsbn1	-1.38218	4.7715	7.39287	0.00654828	0.0981186
Dtx4	-2.71353	2.28245	7.39071	0.00655615	0.0981186
Dusp16	1.72854	3.68789	7.38898	0.00656248	0.0981186
Lrig2	-2.01405	3.88396	7.38175	0.00658889	0.0981212
Dhrs3	-1.47948	5.0345	7.38146	0.00658996	0.0981212
Cyp2f2	-9.42519	1.78498	7.38567	0.00657455	0.0981212
Mfap3l	-3.06703	5.23547	7.37572	0.00661104	0.0982994
Irf2	-3.28178	2.17239	7.37043	0.0066305	0.0984529
Gtf2f1	1.19581	5.47122	7.36094	0.00666559	0.0988134
Ccdc138	3.70472	1.60446	7.35891	0.00667311	0.0988134
Tnfrsf8	1.97202	3.37878	7.35091	0.00670289	0.0991182
Gclc	-1.45239	4.7064	7.34662	0.00671888	0.0992186
Blvrb	2.6147	10.1449	7.33932	0.00674624	0.0993504
Snap23	-1.48619	7.86257	7.3406	0.00674142	0.0993504
Mink1	-2.72417	2.45999	7.33587	0.00675921	0.0994056
Cdc27	-0.972809	5.26333	7.32727	0.00679163	0.0996105
Farp1	-6.98081	1.04713	7.32783	0.00678951	0.0996105
Prf1	1.85167	6.35514	7.30281	0.00688469	0.100722
Zfp317	-1.30625	4.66561	7.30244	0.00688612	0.100722
Mfap1a	-1.04962	5.04708	7.29919	0.00689856	0.100768
Orc4	-1.14533	5.57596	7.29626	0.00690983	0.100796
Rbm18	-1.10546	4.94399	7.28747	0.0069437	0.101153
Syngr2	1.18966	5.56706	7.27811	0.00698001	0.101545
Gm7160	-3.05867	1.97246	7.26308	0.00703864	0.101949
Kcnip3	3.44376	1.18842	7.2613	0.00704562	0.101949
Pdcd11	1.43942	3.5605	7.26173	0.00704393	0.101949
Csgalnact1	-2.45103	3.26519	7.26334	0.00703764	0.101949
Tmprss13	4.13702	1.93558	7.243	0.00711781	0.102247
Arel1	1.07192	6.69162	7.2384	0.00713606	0.102247
Tmem189	1.23324	4.75877	7.24669	0.0071032	0.102247
Ptafr	1.47558	5.09132	7.24383	0.0071145	0.102247
Brd3	-1.52543	3.5956	7.23688	0.00714212	0.102247
C3	-2.84721	7.5513	7.23865	0.00713505	0.102247
Dpys	-5.56864	2.54407	7.24431	0.00711261	0.102247
2310034O05Rik	-4.37767	1.01368	7.23813	0.00713711	0.102247
Esr1	-3.68438	1.84342	7.23266	0.00715891	0.102352
Trmt10c	-1.70014	4.24031	7.22932	0.00717223	0.102406
Podnl1	4.46963	2.66378	7.22499	0.00718955	0.102518
Prkrip1	1.66839	3.5685	7.21778	0.00721849	0.102717
Cd164	-1.09366	7.50936	7.21055	0.00724765	0.102717
Itgad	3.8097	2.12002	7.21084	0.00724648	0.102717
Trim37	1.3054	5.15929	7.20968	0.00725115	0.102717
Cnot8	1.35373	4.14833	7.21474	0.00723071	0.102717
Ptger3	-6.86105	0.639356	7.19241	0.00732127	0.103574
Tbc1d10b	1.26069	4.47974	7.18932	0.00733388	0.103616
Hexdc	-3.02926	1.88549	7.18283	0.00736046	0.10372
Paqr7	-1.64939	3.96927	7.18495	0.00735177	0.10372
Rabgap1l	-1.00492	7.15235	7.17689	0.00738487	0.103928
Peli2	-6.03014	0.936598	7.1731	0.00740047	0.104012
Ypel4	3.76517	3.48135	7.16337	0.00744074	0.104442
Gm14295	-5.95842	1.10346	7.14722	0.00750804	0.105249
Csf1r	1.45206	7.69975	7.13538	0.00755774	0.105308
Pex13	-1.15168	4.50892	7.14312	0.0075252	0.105308
Spryd7	-1.71598	3.34156	7.13901	0.0075425	0.105308
Foxo1	-1.24312	4.70548	7.1346	0.00756107	0.105308
Bptf	-1.41699	4.94083	7.14139	0.00753246	0.105308
Nr1h3	2.98224	4.30412	7.12915	0.00758406	0.105356
Yaf2	-1.63556	4.72914	7.1301	0.00758007	0.105356
Zfp709	-1.48535	3.84919	7.11968	0.00762422	0.105777
Rnf121	-1.77266	3.54236	7.11297	0.00765282	0.106038
Usp46	1.73049	4.18653	7.1103	0.00766424	0.106046
Rpl28	1.18521	9.11599	7.10823	0.00767309	0.106046
Nr4a3	2.97389	1.55967	7.10324	0.00769447	0.106205
Ppp2r5b	2.8565	5.26891	7.09901	0.00771264	0.10632
Serpinb6b	1.75352	6.61357	7.09622	0.00772466	0.10635
Cldn13	3.83162	4.82677	7.09218	0.00774209	0.106454
Gm8817	-6.17409	0.803893	7.08559	0.00777064	0.10671
Tmem101	1.87917	2.57164	7.07808	0.00780326	0.107022
A930005H10Rik	-1.90018	3.56433	7.07318	0.00782463	0.107148
Tuba4a	1.98745	9.41948	7.07142	0.00783233	0.107148
Usp36	-2.08782	2.71925	7.06533	0.00785901	0.107241
Sgcb	-2.50112	3.04419	7.06701	0.00785161	0.107241
Cr2	-2.37153	5.10441	7.05639	0.0078983	0.107505
Ifi44	2.48327	5.49141	7.0584	0.00788945	0.107505
Ddb2	-1.62974	4.54443	7.05387	0.00790943	0.10752
Gm26517	-3.93899	1.16899	7.04567	0.0079457	0.107877
Adam19	-1.32401	5.16658	7.03246	0.00800455	0.108403
Stard10	-2.26338	4.45746	7.0332	0.00800122	0.108403
Ckap2l	2.78716	3.30552	7.02439	0.00804068	0.108737
Gstm1	-2.64425	4.73426	7.02247	0.00804933	0.108737
Ang	-5.07011	2.7982	7.01507	0.00808265	0.108828
Ckap2	2.64887	3.29908	7.01424	0.00808639	0.108828
Chmp2a	0.961735	7.32274	7.0169	0.00807437	0.108828
Ifitm3	1.22101	8.69705	7.01038	0.00810385	0.108927
Ambp	-13.1058	4.92312	7.006	0.0081237	0.108942
Adamdec1	-3.0099	2.37397	7.00568	0.00812516	0.108942
Rida	-2.5274	5.39984	6.98907	0.00820091	0.109085
Smox	2.41906	10.3096	6.98795	0.00820603	0.109085
Gde1	-1.16016	4.69659	6.99667	0.00816616	0.109085
Syne1	-1.53947	4.31785	6.99772	0.00816134	0.109085
Map3k11	1.68169	3.47567	6.9878	0.00820671	0.109085
Gpr174	-1.42536	4.97259	6.99443	0.00817637	0.109085
Ptpdc1	-6.23233	0.935124	6.99478	0.00817479	0.109085
Fasn	-2.75327	3.73826	6.97293	0.00827518	0.109782
Mcm5	1.85698	5.85328	6.97201	0.00827945	0.109782
Klri1	-3.51135	1.71553	6.95749	0.00834693	0.110328
Gzmm	2.8756	2.60627	6.95456	0.00836059	0.110328
Aip	1.67758	6.36734	6.95435	0.00836158	0.110328
Dgkd	-0.827472	6.47523	6.95698	0.00834927	0.110328
Tbce	-0.998565	5.06462	6.93047	0.00847394	0.111674
Gprasp1	-1.69065	4.21642	6.91676	0.00853915	0.112146
Tmc4	-3.10709	1.79294	6.91637	0.00854101	0.112146
Zfp277	-1.00592	5.23582	6.91802	0.00853316	0.112146
Akt1	1.16425	5.36533	6.91114	0.00856605	0.112338
Rhou	-3.79142	1.9225	6.89716	0.00863329	0.11302
Pdcd4	-0.962594	6.53902	6.89381	0.00864946	0.11302
Ogdh	1.01157	6.46707	6.89583	0.00863972	0.11302
Gca	3.03077	1.92742	6.87645	0.00873389	0.113435
Nptn	-1.64101	8.52987	6.87811	0.00872579	0.113435
Asf1b	1.68645	3.75684	6.88069	0.0087132	0.113435
Faap24	3.11982	1.53086	6.88345	0.00869973	0.113435
Rab27b	-2.43547	5.60912	6.87873	0.00872274	0.113435
Klrc3	-6.1242	0.69733	6.86975	0.0087667	0.113669
Opa3	1.33996	4.15185	6.86846	0.008773	0.113669
Mxd1	1.47536	6.69866	6.86595	0.00878534	0.113685
2001-09-01	1.40576	6.15517	6.86393	0.0087953	0.113685
Pfkp	1.17583	7.04138	6.85695	0.00882972	0.113993
Gm15922	-2.40078	2.86222	6.85339	0.00884734	0.114084
Snx20	1.17824	5.51352	6.84807	0.00887373	0.114288
Adarb1	-3.7942	1.15665	6.84586	0.00888468	0.114292
Prpf4b	-0.991011	6.40677	6.82979	0.008965	0.114506
Pan2	-1.15285	4.30598	6.83765	0.00892564	0.114506
Mob3c	-1.34337	4.40262	6.83177	0.00895504	0.114506
Tada2b	-2.41183	2.79796	6.83658	0.00893094	0.114506
Lsm14a	-0.84152	5.7771	6.83451	0.00894131	0.114506
Mrpl12	-1.84228	3.41087	6.83167	0.00895555	0.114506
Osm	2.77903	2.93648	6.81547	0.00903717	0.114607
Gtf3c5	-1.86553	3.09679	6.82358	0.00899623	0.114607
Rfx7	-1.36687	4.6187	6.8124	0.0090527	0.114607
Ttpa	-11.2524	2.97558	6.8144	0.00904255	0.114607
Acer2	-2.31919	5.68276	6.81926	0.00901799	0.114607
Dctn2	1.20844	6.49711	6.81444	0.00904239	0.114607
Anxa2	1.12227	9.09085	6.81136	0.00905799	0.114607
Atp5l	1.77188	8.94282	6.82308	0.00899871	0.114607
Tgtp1	1.52201	7.31153	6.80569	0.00908677	0.114836
Btnl10	3.00293	4.00496	6.80076	0.00911192	0.114885
Nagpa	1.26577	4.05782	6.80262	0.00910242	0.114885
Ube2t	-2.89023	2.00656	6.77687	0.00923465	0.11611
Tlr4	1.49554	4.36742	6.77557	0.0092414	0.11611
Heca	-1.12915	6.34803	6.77558	0.00924137	0.11611
Gpr27	4.48616	0.163555	6.77205	0.00925966	0.116204
Tmem38b	1.40141	3.54645	6.75766	0.00933462	0.117008
Smyd5	-2.67992	1.98138	6.75391	0.00935423	0.117118
Nars	1.48845	8.2005	6.73311	0.00946396	0.117808
Spc25	1.96205	3.25332	6.73528	0.00945244	0.117808
Kif11	2.37137	5.43261	6.73834	0.00943623	0.117808
Adi1	-1.79013	3.47576	6.73972	0.00942892	0.117808
Enpp5	-2.29197	3.1905	6.7332	0.00946347	0.117808
Serpina1a	-14.1	5.68396	6.72603	0.00950157	0.117868
Fads1	-2.6988	3.84197	6.7268	0.00949746	0.117868
Slc44a1	-1.77629	6.59835	6.72991	0.00948094	0.117868
Gk	1.32998	4.88718	6.72156	0.00952541	0.118028
Ccnf	3.77086	2.25415	6.71854	0.00954156	0.118092
Ooep	-4.42965	1.71862	6.7069	0.00960403	0.118593
Apoa2	-12.4458	6.69715	6.70739	0.00960144	0.118593
H2.T23	1.04589	8.97146	6.696	0.00966296	0.119128
Psme1	0.956098	8.36856	6.69423	0.00967252	0.119128
P2ry1	-2.29363	3.59454	6.68869	0.00970267	0.119128
Zfp606	-2.12984	3.16922	6.69265	0.00968111	0.119128
Mthfd2	2.08686	7.59961	6.68872	0.00970248	0.119128
Rmnd1	-1.38865	4.81136	6.68547	0.00972019	0.119208
Gm6548	1.60856	5.02793	6.68175	0.00974049	0.119321
Zbtb25	-1.3825	3.45104	6.67727	0.00976501	0.119379
Casd1	-1.45328	4.73644	6.67684	0.00976736	0.119379
Gm10033	-3.07467	2.47552	6.6738	0.00978403	0.119447
Vamp5	1.57077	3.60205	6.66812	0.00981525	0.119693
Tnip1	1.90859	2.26838	6.66412	0.00983731	0.119826
Knl1	2.2621	3.02033	6.65807	0.0098708	0.120098
Sh3pxd2a	-2.73784	2.06122	6.65389	0.00989397	0.120245
Sertad1	1.27961	4.82555	6.64881	0.00992219	0.120316
Chtf18	3.65289	0.954612	6.65059	0.00991229	0.120316
Gng11	-2.49113	10.1836	6.64635	0.00993592	0.120347
S1pr1	-0.876492	6.99109	6.64313	0.00995386	0.120429
Dusp22	-1.18255	4.13314	6.63097	0.0100221	0.121119
Pitpnm2	-3.93329	0.849621	6.6251	0.0100552	0.121382
Cpm	-1.38648	4.38312	6.61668	0.0101028	0.121618
Ssx2ip	-1.74591	3.9706	6.61877	0.0100909	0.121618
Aldh3b1	1.22942	5.08796	6.61567	0.0101085	0.121618
Gadd45b	1.8373	3.90028	6.60954	0.0101434	0.121722
Metap2	1.49568	8.72083	6.60622	0.0101623	0.121722
Cfap20	-1.26347	3.9284	6.60622	0.0101623	0.121722
Tec	-1.03699	5.37337	6.61057	0.0101375	0.121722
Psma5	1.0389	7.37511	6.60312	0.0101801	0.121768
Gab2	-1.42357	4.42721	6.59604	0.0102206	0.121768
Zfp318	-1.13065	5.39929	6.59804	0.0102091	0.121768
Gm6637	3.10287	3.11033	6.59569	0.0102226	0.121768
Pln	5.11462	0.812208	6.59945	0.010201	0.121768
Bfsp2	-1.90128	2.70049	6.58722	0.0102713	0.122213
Mcee	-1.50512	3.34166	6.58403	0.0102897	0.122297
Lpgat1	-0.895893	5.64666	6.58082	0.0103084	0.122383
Rgl1	1.70105	2.83038	6.57642	0.0103338	0.122483
Adtrp	-7.52471	0.889734	6.5735	0.0103508	0.122483
Dennd1b	-0.978965	5.26502	6.57416	0.010347	0.122483
Pdlim5	1.01558	5.17333	6.5694	0.0103747	0.122631
Pcyt1b	2.33715	3.15522	6.56125	0.0104223	0.122662
Knop1	-1.33312	4.78547	6.55835	0.0104393	0.122662
Ikbke	1.02984	6.08515	6.55728	0.0104456	0.122662
Twf1	-1.43687	5.155	6.56116	0.0104229	0.122662
Slc7a7	2.26101	3.13257	6.56169	0.0104197	0.122662
Bace1	-4.55228	1.35584	6.55993	0.0104301	0.122662
Gm48529	3.20746	1.77286	6.54836	0.0104981	0.12301
Car5b	3.24755	3.32997	6.54997	0.0104886	0.12301
Eef2	1.17365	10.2059	6.54105	0.0105413	0.123249
B3gnt5	-1.15288	6.12266	6.54225	0.0105342	0.123249
Melk	3.41285	2.89027	6.53447	0.0105804	0.123557
Trpc6	-3.49637	2.69668	6.53275	0.0105906	0.123557
Gm15675	-1.20312	5.94435	6.52156	0.0106575	0.123866
Cdk19	-0.946149	5.76371	6.52063	0.010663	0.123866
Bloc1s5	-1.52914	3.21655	6.52497	0.010637	0.123866
Tnf	2.3997	2.75113	6.52251	0.0106518	0.123866
Crip2	2.43306	2.69658	6.51504	0.0106966	0.124122
Kif20a	2.3419	4.21039	6.50555	0.0107538	0.124652
Mef2c	-1.15978	6.36701	6.50028	0.0107857	0.124777
Mbnl1	-1.17542	9.64911	6.49995	0.0107877	0.124777
Cxcl2	4.48919	0.480455	6.49671	0.0108074	0.124871
Uba7	1.1565	6.89029	6.49089	0.0108429	0.125146
Tespa1	-2.01591	4.28214	6.4793	0.0109138	0.125829
Gm47572	-3.72757	1.05461	6.47351	0.0109494	0.126019
Slc43a1	2.53391	6.76654	6.47283	0.0109536	0.126019
Zfp811	-5.91179	1.52626	6.46814	0.0109825	0.126083
Zfp760	-1.87348	3.20599	6.46899	0.0109773	0.126083
H2.D1	1.19646	11.5845	6.46063	0.0110291	0.126393
Gm26799	-2.52322	1.62191	6.46	0.011033	0.126393
Cd9	-2.07368	9.31116	6.44607	0.0111198	0.127252
Tada3	2.75648	2.08856	6.43334	0.0111998	0.127786
2510046G10Rik	-2.60844	1.27675	6.43254	0.0112048	0.127786
Rras	1.62467	4.49911	6.43203	0.011208	0.127786
Pms1	-1.46188	3.33168	6.43111	0.0112138	0.127786
Ankrd36	5.94322	4.34168	6.41981	0.0112854	0.128304
Sult1a1	-5.30094	4.31658	6.41831	0.011295	0.128304
Camk1	-1.08547	4.92678	6.4183	0.011295	0.128304
Rnh1	1.13285	7.06531	6.4132	0.0113275	0.128313
Sprtn	-1.05882	4.65673	6.41039	0.0113455	0.128313
Pdk1	-1.0748	5.85238	6.40764	0.011363	0.128313
Ppp1r35	2.33959	1.5111	6.41242	0.0113325	0.128313
Vwa5a	1.27754	6.82754	6.40698	0.0113672	0.128313
Eml2	1.59532	3.0161	6.41472	0.0113178	0.128313
Rasgrp3	-1.65771	4.62102	6.40042	0.0114094	0.128592
Gm11714	-6.85267	0.656025	6.39942	0.0114158	0.128592
Rnf123	1.88978	6.16573	6.39014	0.0114756	0.12913
Apoa1	-13.6341	5.37113	6.3788	0.0115491	0.129822
Ifit3b	2.5741	6.52996	6.3758	0.0115687	0.129907
G6pdx	0.833488	6.69178	6.37325	0.0115853	0.129958
Slc4a2	2.20018	2.33381	6.36278	0.0116539	0.130354
Kctd20	1.02383	7.44837	6.35354	0.0117147	0.130354
Ighv7.3	-3.06233	1.73616	6.35847	0.0116822	0.130354
Neto2	-5.87274	0.932106	6.35683	0.011693	0.130354
Fgf1	-7.50564	1.45646	6.36165	0.0116613	0.130354
Avl9	-0.967273	5.15166	6.35314	0.0117174	0.130354
Lsm12	-1.62355	6.13338	6.35767	0.0116875	0.130354
AW554918	-3.7826	1.45756	6.35597	0.0116987	0.130354
Napsa	0.968333	7.45027	6.35108	0.011731	0.130371
Dap	-1.65295	6.58544	6.34067	0.0118	0.130981
Ostf1	1.04492	8.09878	6.33915	0.0118101	0.130981
kr8	2.03048	2.39756	6.30127	0.0120652	0.131369
Hal	-4.18703	3.42251	6.2985	0.012084	0.131369
Pafah2	-2.59527	2.67671	6.31702	0.0119584	0.131369
Serpina1c	-14.7222	6.31095	6.32725	0.0118897	0.131369
Lpin2	1.3128	7.17958	6.28833	0.0121535	0.131369
Oxnad1	-2.09426	2.94841	6.29012	0.0121413	0.131369
Lcmt1	1.47943	3.95565	6.30576	0.0120346	0.131369
Als2cl	-1.11968	5.2563	6.2871	0.012162	0.131369
Atf2	-1.14105	5.19253	6.29589	0.0121018	0.131369
Ngp	4.70989	4.87515	6.29721	0.0120928	0.131369
Aldh1a7	-5.28984	2.51211	6.29342	0.0121187	0.131369
Epcam	-3.56279	1.66988	6.28945	0.0121459	0.131369
Siglech	-2.75755	2.70565	6.29423	0.0121132	0.131369
Mphosph8	-1.15432	4.48043	6.30262	0.012056	0.131369
Lair1	1.29826	6.4016	6.30075	0.0120687	0.131369
Ago1	-1.76651	3.11705	6.31687	0.0119594	0.131369
Hc	-11.6242	3.68078	6.29872	0.0120825	0.131369
Gnb2	1.21154	5.80514	6.29359	0.0121175	0.131369
Chaf1a	2.43716	2.51326	6.29615	0.0121001	0.131369
Eif5a2	-1.79734	3.6092	6.32772	0.0118865	0.131369
Mtss1	-1.16324	5.01732	6.29563	0.0121036	0.131369
Ubl7	1.4873	4.85227	6.31108	0.0119986	0.131369
Snx10	0.95843	6.43483	6.29399	0.0121148	0.131369
Csnk1d	0.99338	6.55317	6.32435	0.0119091	0.131369
Coa5	-1.21035	6.83793	6.32978	0.0118727	0.131369
Ighg2b	2.43428	4.40771	6.29708	0.0120937	0.131369
Cmas	2.27523	11.4707	6.27931	0.0122156	0.131816
H2.Ob	-0.947538	8.1331	6.27647	0.0122352	0.131857
Haus4	1.4193	4.06392	6.27466	0.0122477	0.131857
Rpl29	1.28169	8.39456	6.27343	0.0122561	0.131857
Scaper	-1.24212	4.02565	6.2616	0.0123383	0.132609
Kmt5a	1.04242	5.18894	6.25634	0.0123749	0.13287
Zfp943	-1.07379	4.87091	6.25365	0.0123938	0.13294
Gm28437	-1.3254	5.25368	6.2475	0.0124369	0.13327
Fli1	-0.914241	5.87032	6.23803	0.0125035	0.133718
Ccl2	-3.99688	1.20029	6.23803	0.0125035	0.133718
Nlrc5	1.02052	7.29811	6.23098	0.0125535	0.134119
Suclg1	-0.960594	5.53593	6.22262	0.0126128	0.13462
Cenpe	2.99069	3.94545	6.21075	0.0126977	0.135392
Rars2	-1.21126	4.17183	6.20439	0.0127434	0.135634
Hsbp1	-1.00771	6.11748	6.2029	0.0127541	0.135634
Bcl2a1a	1.66501	3.72255	6.20235	0.0127581	0.135634
2810002D19Rik	-2.5725	2.00545	6.19034	0.012845	0.136422
Csrnp1	1.89126	3.57496	6.18169	0.0129079	0.136956
F2r	1.55533	5.00356	6.17915	0.0129264	0.136983
Stk11	1.1705	6.00918	6.17612	0.0129486	0.136983
Trim34a	-1.12656	6.99908	6.17761	0.0129377	0.136983
Zfp280d	-1.78873	4.19261	6.17339	0.0129686	0.137001
A530030E21Rik	-2.11261	3.70199	6.16879	0.0130023	0.137001
Zfp958	-1.63589	3.73684	6.16723	0.0130138	0.137001
Parp12	1.31567	5.65032	6.17113	0.0129851	0.137001
Kpna3	-0.935553	4.9515	6.16933	0.0129984	0.137001
Pcgf6	-1.7302	3.32086	6.16294	0.0130454	0.137126
Ptgr1	1.81438	3.21988	6.16217	0.0130511	0.137126
Fcer2a	-1.84551	5.42788	6.15276	0.0131207	0.137723
Armcx5	-2.19333	3.13267	6.14119	0.0132069	0.138492
Mrpl20	1.16998	6.1263	6.13473	0.0132552	0.138864
A130010J15Rik	-1.76898	2.5535	6.11941	0.0133705	0.139801
Trem3	1.57907	5.2725	6.12053	0.0133621	0.139801
Aamp	0.933442	5.58052	6.11614	0.0133953	0.139821
4933439C10Rik	-2.26268	1.80412	6.11572	0.0133985	0.139821
Spn	1.13933	7.95839	6.11021	0.0134403	0.139987
Chst15	-1.49437	4.57632	6.11142	0.0134311	0.139987
Rhobtb2	-1.51476	3.22417	6.10183	0.0135042	0.140381
Kpna2	1.10052	6.41247	6.10318	0.0134939	0.140381
Fam214a	-1.14314	4.44378	6.08971	0.0135971	0.141211
Ccl8	4.07681	0.613302	6.08003	0.0136718	0.141241
Psmb3	1.06772	6.97979	6.08677	0.0136198	0.141241
Tcta	-1.41012	4.82339	6.07916	0.0136786	0.141241
AW549877	-1.14703	5.30949	6.08105	0.013664	0.141241
Gm16675	1.99951	2.47749	6.08512	0.0136325	0.141241
Lbh	-0.836978	4.79494	6.08349	0.0136451	0.141241
5830432E09Rik	-2.52425	2.78923	6.07403	0.0137183	0.141245
Gpx3	4.00407	2.44165	6.0769	0.0136961	0.141245
Rhog	0.884775	5.17821	6.07527	0.0137087	0.141245
Vcp	1.04725	8.49004	6.06919	0.013756	0.141456
Crebzf	-1.14469	5.33677	6.06803	0.013765	0.141456
Ube2g1	-1.25124	4.91275	6.06275	0.0138062	0.141744
Il4	-3.50983	1.8877	6.05937	0.0138327	0.14188
Entpd5	-1.22486	5.06665	6.05392	0.0138755	0.142184
Ascc2	1.21794	4.81623	6.04957	0.0139097	0.142399
Fanca	1.75787	3.58131	6.04607	0.0139373	0.142547
Wwp1	-1.14318	4.39908	6.03998	0.0139854	0.142633
Cdc37	0.909284	5.81138	6.04218	0.013968	0.142633
Slc35a1	-1.69931	3.59339	6.04097	0.0139776	0.142633
Cers6	0.898614	6.13789	6.02176	0.0141305	0.142936
Vrk3	0.867866	5.62057	6.02362	0.0141157	0.142936
Sh3bgrl2	-2.57815	6.96934	6.023	0.0141206	0.142936
0.43	-3.13877	1.36549	6.0318	0.0140504	0.142936
Fam214b	1.95246	7.92973	6.02525	0.0141026	0.142936
Atp1a1	0.975167	7.98408	6.02184	0.0141299	0.142936
Gale	2.09847	2.96036	6.01962	0.0141477	0.142936
Tnfrsf1b	1.03209	6.11469	6.0323	0.0140464	0.142936
Bmi1	-0.99524	4.97939	6.02799	0.0140808	0.142936
Spin1	-1.09831	5.16436	6.02052	0.0141405	0.142936
Sufu	-1.79637	2.43177	6.01663	0.0141717	0.143044
Trak2	1.99129	8.2306	6.00808	0.0142405	0.143604
Ulk2	-0.973752	4.85515	6.00459	0.0142687	0.143754
Grhpr	-3.15298	2.28335	5.99491	0.0143472	0.144409
Eml5	-2.1648	2.68272	5.98724	0.0144097	0.144903
Eif3c	0.90603	7.88719	5.97653	0.0144975	0.14565
Nudt17	3.43463	1.32714	5.97	0.0145513	0.145853
Mmd	-2.48168	7.96758	5.9703	0.0145488	0.145853
Usp18	1.56199	7.25145	5.96716	0.0145748	0.145853
Serpina1b	-14.9274	6.47193	5.96664	0.014579	0.145853
Usb1	1.03889	5.11157	5.96589	0.0145853	0.145853
Acbd3	-1.0284	4.87515	5.96213	0.0146164	0.146028
Zfp869	-1.03227	5.12974	5.9604	0.0146308	0.146037
Myl2	4.37023	2.54515	5.95222	0.0146988	0.146527
Slc25a47	-6.92465	3.03241	5.95122	0.0147071	0.146527
Hist2h2be	-2.2401	2.77926	5.94661	0.0147456	0.146776
Ctla2a	-2.21027	10.6847	5.92547	0.0149236	0.148391
Car6	3.86324	2.10159	5.92406	0.0149355	0.148391
Akr1e1	-2.09153	2.98146	5.91957	0.0149736	0.148617
Herc4	-0.929331	6.91501	5.91814	0.0149858	0.148617
D17Wsu92e	1.22197	7.76127	5.91445	0.0150172	0.148792
Alg5	-1.21627	4.71523	5.91278	0.0150314	0.148796
Tcea2	-2.10557	2.64951	5.91049	0.015051	0.148853
H2.T22	1.1749	8.75518	5.89904	0.0151491	0.149585
Rnaseh2c	1.68612	3.66303	5.89862	0.0151527	0.149585
Zc3h14	-0.795651	6.15327	5.89156	0.0152136	0.149878
Ralgps2	-0.994049	6.48921	5.8902	0.0152253	0.149878
Ecm1	-2.01411	4.54822	5.88873	0.0152381	0.149878
Polr3k	-1.25779	4.92184	5.8924	0.0152064	0.149878
Rnft1	-1.26444	4.39996	5.88234	0.0152935	0.150286
Kcnk5	2.0086	3.31477	5.87264	0.015378	0.150979
Cstf1	0.956627	4.08647	5.86271	0.0154649	0.151649
H6pd	-1.78383	4.27588	5.86164	0.0154744	0.151649
Mctp1	-2.65261	5.4694	5.85849	0.0155021	0.151727
Anapc2	0.969549	4.59683	5.85753	0.0155105	0.151727
Commd8	-0.898715	5.70563	5.82753	0.0157773	0.153779
Susd1	-1.1889	5.06598	5.83061	0.0157496	0.153779
Tmem14c	1.01726	6.13767	5.82876	0.0157662	0.153779
Tbc1d19	-3.0042	1.56284	5.82995	0.0157556	0.153779
Socs6	-1.32783	3.71866	5.81974	0.0158473	0.154182
Ltf	2.68474	6.68916	5.82036	0.0158417	0.154182
Rps26	1.10731	7.73482	5.81376	0.0159013	0.154568
Smu1	-0.7841	6.86068	5.806	0.0159715	0.154865
Map2k2	1.66738	7.08236	5.80744	0.0159585	0.154865
Mgst3	2.45818	6.46932	5.79932	0.0160324	0.154865
Ift52	-1.22034	3.84635	5.80297	0.0159992	0.154865
Macf1	-0.880191	7.16283	5.8014	0.0160134	0.154865
Nlrp12	-1.63232	4.71957	5.79992	0.0160269	0.154865
Htra2	1.04918	5.13958	5.80491	0.0159815	0.154865
Gsta3	-7.62081	4.22349	5.79139	0.0161048	0.155425
St3gal4	0.944229	5.77039	5.78875	0.0161291	0.15552
Lrp10	0.943707	5.43212	5.78185	0.0161925	0.155748
Tmem51	1.74211	4.32217	5.77833	0.016225	0.155748
Pigg	-2.0208	1.85164	5.78117	0.0161987	0.155748
Lrrk1	1.17899	4.45454	5.78037	0.0162061	0.155748
Cmpk2	1.2398	7.02663	5.77965	0.0162128	0.155748
Fcmr	-1.0131	7.1217	5.77155	0.0162877	0.156211
Ptcd3	-1.02419	4.95526	5.76888	0.0163125	0.15631
Tmed10	-0.916422	6.1039	5.7638	0.0163597	0.156345
Cct7	1.08594	8.35852	5.76383	0.0163594	0.156345
Stard3	1.07388	4.92252	5.76687	0.0163311	0.156345
po1	-0.991041	6.51345	5.7586	0.0164081	0.156669
Ttc19	-2.96639	2.26189	5.75458	0.0164457	0.156889
Stat3	0.81523	5.90807	5.74909	0.0164972	0.157241
Tubg1	1.46443	3.64256	5.74659	0.0165207	0.157326
Apobec2	2.99124	3.26431	5.74386	0.0165464	0.157432
Haao	-1.3771	4.93422	5.73899	0.0165924	0.15773
Msi2	-1.27148	4.87317	5.7317	0.0166614	0.157829
Asprv1	1.64241	5.82362	5.732	0.0166585	0.157829
Homer3	-2.34951	2.9792	5.73572	0.0166233	0.157829
Scn1b	3.6238	1.93387	5.73291	0.0166499	0.157829
Ms4a7	3.39846	1.17242	5.71424	0.0168278	0.15857
Zfp444	-3.08892	1.56394	5.71512	0.0168194	0.15857
Tlk1	-1.11259	6.27861	5.71679	0.0168035	0.15857
Itgae	-1.98529	2.95572	5.7169	0.0168024	0.15857
Mcm6	1.00674	6.99215	5.71758	0.0167959	0.15857
Zfp28	-2.24264	1.99447	5.71943	0.0167781	0.15857
Fbxo30	2.09676	6.28269	5.70028	0.0169622	0.159306
B3gnt9	3.77674	0.495683	5.70374	0.0169288	0.159306
Zfp54	-2.37184	2.58662	5.69583	0.0170052	0.159306
Pnpo	2.64624	11.4461	5.69638	0.0169999	0.159306
Apoc1	-8.92641	6.07002	5.69608	0.0170029	0.159306
Gm19684	2.93626	1.57514	5.6954	0.0170094	0.159306
Med12	1.35827	4.36683	5.69546	0.0170088	0.159306
Txn1	0.954374	7.46477	5.68563	0.0171044	0.159978
Coq10b	1.26718	4.18787	5.68193	0.0171405	0.159978
Rhoj	-2.03231	4.53565	5.68317	0.0171284	0.159978
Eno1	0.985129	7.5188	5.68426	0.0171178	0.159978
Itih3	-11.6847	3.62716	5.67893	0.0171699	0.160113
Nr2f6	-2.38064	2.12428	5.6768	0.0171907	0.160169
Eif2ak3	-1.45439	4.48555	5.67504	0.017208	0.160191
Eif5a	0.849243	8.07099	5.6666	0.0172909	0.160825
Sipa1l1	1.404	3.51732	5.66155	0.0173408	0.161149
Syt13	-3.27403	3.58973	5.65132	0.0174422	0.161825
Lsm8	-1.38216	4.23304	5.65119	0.0174435	0.161825
Rarres2	-7.4304	4.16249	5.64522	0.017503	0.162098
Ybey	2.84321	1.34657	5.64627	0.0174925	0.162098
Endod1	1.18453	5.24965	5.63927	0.0175625	0.162276
Tyk2	0.958751	5.66991	5.63884	0.0175668	0.162276
Insr	-1.39032	4.43091	5.63879	0.0175673	0.162276
Cd226	-1.82282	6.26203	5.63463	0.017609	0.162522
Romo1	1.73005	3.49792	5.62546	0.0177014	0.163234
Trappc2	-1.48473	4.27912	5.61659	0.0177913	0.163643
Clec2i	-1.04117	5.85952	5.61929	0.0177639	0.163643
Ifitm10	5.05477	0.362945	5.61659	0.0177912	0.163643
Rras2	-1.1759	6.11348	5.6045	0.0179144	0.164495
Reep3	-1.03569	4.59995	5.60468	0.0179125	0.164495
Ccdc82	-0.967097	5.35992	5.60012	0.0179592	0.164766
Gm16536	-1.9234	2.99187	5.59479	0.018014	0.165128
Birc5	1.84434	4.2994	5.58404	0.0181249	0.166004
Inip	-0.966422	4.90905	5.5803	0.0181636	0.166034
Rab9	-1.27025	3.93661	5.57925	0.0181745	0.166034
Bgn	-6.4794	1.02232	5.58072	0.0181592	0.166034
Qrich1	-0.883918	5.65138	5.57283	0.0182413	0.166504
Insig2	-1.5238	3.60206	5.56576	0.018315	0.167036
Hexim1	1.07566	4.29652	5.56178	0.0183568	0.167138
Lgalsl	-1.99964	5.96309	5.56173	0.0183573	0.167138
Elob	1.68767	8.8749	5.54899	0.0184913	0.167437
Amdhd2	1.59447	3.68913	5.55571	0.0184205	0.167437
Pik3r6	1.41689	3.91301	5.54828	0.0184988	0.167437
Klra14.ps	-2.5195	3.17001	5.55354	0.0184434	0.167437
Prss23	4.08573	0.40632	5.54987	0.0184821	0.167437
Cfap97	-1.13221	4.37077	5.55283	0.0184508	0.167437
Map3k20	2.12916	2.46801	5.55003	0.0184804	0.167437
1700037C18Rik	-2.68654	2.02753	5.5464	0.0185187	0.167476
Tbl1xr1	-0.76184	5.99215	5.54397	0.0185445	0.167569
Anxa5	0.778772	6.82084	5.53607	0.0186284	0.168025
Eif4e3	2.68214	1.81354	5.53482	0.0186417	0.168025
P2ry10	-0.857475	6.63971	5.53485	0.0186414	0.168025
Iglc2	-1.03675	6.89204	5.52999	0.0186932	0.168348
Baz2a	-1.03518	4.42413	5.5171	0.0188314	0.168523
Fcor	4.29542	0.454484	5.5227	0.0187713	0.168523
Gbp3	1.13662	7.08108	5.52583	0.0187377	0.168523
Rundc3a	4.03365	3.96153	5.52148	0.0187843	0.168523
Fhl1	-2.39505	7.30439	5.51745	0.0188277	0.168523
Trim30c	-4.20561	3.06855	5.51507	0.0188534	0.168523
Kctd12	-1.14962	5.74157	5.51559	0.0188477	0.168523
2002-03-01	-0.883015	5.70869	5.51786	0.0188232	0.168523
Bbc3	2.52851	1.23689	5.52096	0.01879	0.168523
Tbc1d5	-1.74174	3.2663	5.50877	0.0189213	0.168991
Cdh17	2.31132	2.43178	5.49903	0.0190271	0.169795
Tuba1b	1.08245	7.60816	5.4968	0.0190513	0.169871
Tle3	0.896153	4.80672	5.4878	0.0191496	0.170422
Gm15832	1.65202	3.56927	5.48912	0.0191352	0.170422
Rassf2	-0.739256	6.38111	5.4868	0.0191606	0.170422
Selplg	0.92975	7.02106	5.47731	0.0192649	0.171208
Ip6k3	2.61512	1.58559	5.47484	0.0192922	0.171309
Pank1	-3.38647	2.34336	5.47001	0.0193455	0.171394
Zfp846	-2.08935	2.80367	5.46679	0.0193812	0.171394
Slc22a5	-1.46181	3.38195	5.47241	0.0193189	0.171394
Zmym2	-0.903454	5.75459	5.46813	0.0193664	0.171394
E2f2	1.83185	9.37358	5.46789	0.019369	0.171394
Clic4	-1.30331	7.23589	5.46379	0.0194145	0.171407
Mid1	-3.28881	0.924941	5.46459	0.0194056	0.171407
Cotl1	1.03191	7.29852	5.44975	0.0195712	0.171992
krx	-2.6096	2.01878	5.44828	0.0195876	0.171992
Cactin	1.29849	3.74962	5.44642	0.0196084	0.171992
Pacs1	-3.46753	1.3693	5.45408	0.0195227	0.171992
Celsr3	2.58609	1.05555	5.44783	0.0195927	0.171992
Cchcr1	2.98707	1.80805	5.44947	0.0195743	0.171992
Gnpda2	-1.28421	4.3297	5.44907	0.0195788	0.171992
Qdpr	-1.41666	4.63224	5.44814	0.0195891	0.171992
Mis18bp1	2.68705	2.79977	5.44362	0.0196399	0.172129
Znrf3	-2.93359	1.79142	5.44189	0.0196594	0.172159
Zfp788	-1.5969	3.61915	5.43786	0.0197048	0.172417
Tsc22d1	-2.16225	10.1354	5.43461	0.0197415	0.172598
Tnfaip3	1.26114	4.82026	5.4324	0.0197665	0.172676
Ap2a2	0.792595	5.8472	5.4307	0.0197857	0.172704
Mpc1	-1.03588	4.814	5.41865	0.0199227	0.172997
Pibf1	-1.50942	2.99796	5.42318	0.0198711	0.172997
Nfe2	1.23745	7.32256	5.41647	0.0199476	0.172997
Mxd4	-0.99453	5.74192	5.418	0.0199302	0.172997
Scap	-1.36757	3.6764	5.41827	0.0199271	0.172997
Thra	2.60103	1.00322	5.42133	0.0198922	0.172997
Osbpl2	-1.12648	4.77702	5.41707	0.0199408	0.172997
Gm30411	-2.93431	5.21123	5.41777	0.0199328	0.172997
Carns1	-2.3152	2.92693	5.415	0.0199644	0.173004
4930581F22Rik	-1.265	4.20109	5.41184	0.0200007	0.173061
Lst1	1.03893	6.10537	5.41162	0.0200031	0.173061
Gga2	-1.04251	5.53976	5.40346	0.0200968	0.173732
Cwc15	0.745859	6.8689	5.40019	0.0201345	0.173779
Gtf2a2	-0.899348	5.38118	5.40129	0.0201218	0.173779
Gcn1l1	1.39094	3.83728	5.39531	0.0201909	0.174126
Cnnm4	2.07858	2.56896	5.38756	0.0202808	0.174762
Rapgef4	-1.51414	3.45732	5.38463	0.0203149	0.174916
Il20rb	3.1067	0.912242	5.38253	0.0203393	0.174986
Trpm7	-0.961241	5.7979	5.38027	0.0203657	0.175074
Serpini1	-1.42243	4.11492	5.37446	0.0204337	0.1751
mt.Nd5	-1.57625	6.30237	5.37556	0.0204207	0.1751
Smim3	-1.69775	6.3193	5.37613	0.0204142	0.1751
Atp2b4	1.78771	5.31922	5.37858	0.0203855	0.1751
Mylpf	2.38094	2.65616	5.36981	0.0204882	0.175151
Serpinb1a	-1.00731	6.72324	5.36853	0.0205033	0.175151
Rgs18	-3.0164	7.65444	5.37152	0.0204681	0.175151
Pemt	-5.82549	2.60974	5.36841	0.0205047	0.175151
Glul	1.50878	9.34887	5.36682	0.0205234	0.175172
Ubtd1	1.48843	3.01952	5.36024	0.0206009	0.175695
Slc11a1	1.16524	6.00779	5.35356	0.02068	0.176229
Zfp398	-1.41302	3.59765	5.35197	0.0206989	0.176251
Purg	-2.69855	1.90637	5.34938	0.0207296	0.176343
Cd1d1	-1.07011	4.60769	5.34831	0.0207424	0.176343
Fadd	-3.05527	1.14108	5.34435	0.0207895	0.176604
Spast	-0.795289	5.16231	5.33731	0.0208737	0.17718
Lef1	-1.2967	4.50445	5.3352	0.0208989	0.177255
Gm1976	-4.14329	1.1992	5.33088	0.0209508	0.177555
Zranb3	-2.31141	3.66615	5.32872	0.0209768	0.177636
Plekhg2	-2.13224	1.93989	5.31966	0.0210861	0.177862
Flot2	1.35839	3.68541	5.32339	0.0210411	0.177862
Prpf38b	-1.10869	5.3601	5.32216	0.0210559	0.177862
1110008L16Rik	-1.66769	3.08452	5.32055	0.0210754	0.177862
Brms1l	-1.62346	3.15232	5.32445	0.0210283	0.177862
Lcn4	-2.74616	2.13649	5.31152	0.0211849	0.178446
Ptprf	-6.61872	1.15709	5.31123	0.0211884	0.178446
Ube4a	-1.07915	4.40711	5.30853	0.0212212	0.178538
Plscr4	-4.56027	1.15794	5.30651	0.0212458	0.178538
Strbp	-1.12185	5.36838	5.30626	0.021249	0.178538
Vnn1	-9.12315	1.43931	5.30131	0.0213094	0.178906
Gpm6b	-2.80784	2.49324	5.29767	0.021354	0.179141
Mycbp2	-0.876323	6.05491	5.28387	0.0215239	0.17954
Cks2	1.29762	4.39165	5.28778	0.0214756	0.17954
Kctd6	-2.16745	2.32341	5.28361	0.021527	0.17954
Pccb	-1.6053	3.58313	5.28098	0.0215596	0.17954
Rpl19	0.875018	9.11186	5.28256	0.0215401	0.17954
Gm16556	-2.86224	2.76225	5.27895	0.0215848	0.17954
dh	1.03729	7.41987	5.29125	0.0214328	0.17954
Fah	-3.38679	3.60477	5.27922	0.0215814	0.17954
Sh3bp2	0.971062	4.87397	5.29	0.0214482	0.17954
Ccs	1.47885	5.56371	5.2855	0.0215037	0.17954
Bsdc1	1.96114	8.74754	5.27983	0.0215738	0.17954
Bcl2l1	2.57802	6.25305	5.27624	0.0216184	0.179681
2310031A07Rik	3.60402	1.72057	5.2734	0.0216537	0.179697
Rnd1	2.33718	3.08826	5.27423	0.0216433	0.179697
Zfp946	-3.00164	1.38499	5.26962	0.0217007	0.17981
Plp1	-3.36717	5.18266	5.26973	0.0216994	0.17981
Hid1	3.4098	1.30976	5.26409	0.0217698	0.18011
Fam96b	1.58238	3.90809	5.26272	0.0217869	0.18011
Ass1	-2.10931	5.47742	5.26327	0.0217801	0.18011
Snrnp48	-1.17307	4.56109	5.24671	0.0219883	0.181635
Uqcr10	1.24849	6.45747	5.24242	0.0220426	0.181945
Akt2	0.890971	7.20229	5.23871	0.0220897	0.18211
Hist1h2be	-2.95108	2.84094	5.23817	0.0220964	0.18211
Orc3	-1.1117	5.25384	5.23383	0.0221517	0.182426
Cacna1i	-1.53457	3.82349	5.2287	0.0222172	0.182825
Lbr	-0.815413	7.24864	5.22389	0.0222786	0.183131
Zfp354c	-2.67987	1.48722	5.22314	0.0222883	0.183131
Tex30	-1.89669	2.87462	5.21712	0.0223655	0.183625
St8sia6	-2.00504	3.41619	5.21313	0.022417	0.183908
Rnps1	1.01498	4.62148	5.20792	0.0224843	0.184279
Tfeb	1.84506	3.01414	5.20678	0.022499	0.184279
Serpina3k	-13.2672	7.45856	5.20566	0.0225135	0.184279
Myd88	1.16196	6.35479	5.19681	0.0226284	0.185079
Txk	-1.09804	5.19239	5.19449	0.0226587	0.185115
Rplp0	1.07419	11.7742	5.19384	0.0226671	0.185115
Gtpbp2	1.09808	6.07591	5.18936	0.0227256	0.185452
S100a13	0.99975	6.81474	5.18749	0.02275	0.185511
Zbtb8os	-1.41639	3.86291	5.18454	0.0227887	0.185546
Mterf1b	-3.22913	1.85841	5.18527	0.0227791	0.185546
Cyp4v3	-1.53149	3.93828	5.18179	0.0228249	0.1857
Ftx	-1.49619	3.04007	5.17854	0.0228675	0.185766
F730016J06Rik	-5.5337	0.799532	5.17912	0.0228599	0.185766
Cyb5r1	1.24133	5.18197	5.17538	0.0229091	0.185964
Snrnp25	1.71642	6.2982	5.17138	0.022962	0.186253
Il27ra	-0.975458	4.93055	5.16885	0.0229954	0.186384
Ccdc137	-1.44789	3.73208	5.16474	0.02305	0.186452
Gm44777	-3.82351	1.07681	5.16546	0.0230404	0.186452
4833413G10Rik	-2.28045	2.56447	5.16431	0.0230557	0.186452
Mylk3	2.60548	5.27352	5.15854	0.0231324	0.186932
Cul4a	1.84781	8.28533	5.15429	0.023189	0.187164
Wdr89	1.59032	2.41558	5.15378	0.0231958	0.187164
Srsf10	-0.91528	6.11461	5.15029	0.0232425	0.1874
Airn	-3.50963	0.818602	5.14726	0.0232831	0.18748
Cog5	-0.88076	5.36426	5.14672	0.0232903	0.18748
Nlrp6	-2.95834	2.2942	5.14566	0.0233046	0.18748
1700097N02Rik	2.67851	1.88446	5.14168	0.0233581	0.18777
Csf1	2.22405	3.05188	5.13712	0.0234195	0.188124
Htt	0.996764	4.96673	5.12948	0.0235227	0.188392
Ipo11	-1.47733	6.73485	5.13115	0.0235001	0.188392
Slmap	-1.00105	5.73635	5.13066	0.0235067	0.188392
Ppp1r2	-1.12525	5.53334	5.12979	0.0235185	0.188392
Pld4	0.938774	7.16349	5.12486	0.0235854	0.188613
Pgs1	0.932125	5.52754	5.12487	0.0235853	0.188613
Dennd6a	-0.929084	5.41915	5.10591	0.0238445	0.190544
Dyrk2	-1.04099	4.4226	5.09931	0.0239354	0.191129
Tcp11l2	1.48591	7.14922	5.09171	0.0240405	0.191826
Psmb8	1.01806	8.53233	5.08896	0.0240786	0.191981
Ranbp10	2.02088	8.712	5.08774	0.0240955	0.191981
Frmd4a	1.55824	4.16617	5.0852	0.0241309	0.192121
Pik3cd	0.922581	7.4473	5.08391	0.0241488	0.192121
Acbd4	1.22232	3.84218	5.07953	0.0242099	0.192392
Ifrd1	-1.2026	5.46242	5.07891	0.0242185	0.192392
Cerk	-0.80467	6.45504	5.07209	0.0243141	0.193009
Sin3b	1.04909	7.76233	5.06668	0.02439	0.193165
Arrdc3	-0.949731	6.07911	5.0674	0.0243799	0.193165
Wsb2	0.900257	5.093	5.06559	0.0244054	0.193165
Mia3	-0.897625	5.54361	5.06563	0.0244048	0.193165
Pithd1	1.50313	8.01441	5.06336	0.0244369	0.193272
Frat1	-1.47209	3.1483	5.06085	0.0244723	0.19341
Ubxn1	0.87101	6.54914	5.05887	0.0245002	0.193489
Cst3	0.908674	8.47042	5.05524	0.0245516	0.193753
Etv3	-0.870014	4.75976	5.04485	0.0246992	0.194349
Cd180	-1.38847	3.14623	5.0457	0.0246872	0.194349
Depdc1b	3.28465	2.45338	5.04734	0.0246638	0.194349
Cmip	1.8836	2.44448	5.04497	0.0246975	0.194349
Ms4a6c	1.03824	7.39089	5.0409	0.0247557	0.194651
Slc38a9	-0.958152	4.90437	5.03776	0.0248006	0.194862
2008-03-01	1.71475	7.78342	5.0254	0.0249781	0.196114
Orm1	-9.27105	4.5927	5.01177	0.0251756	0.196331
Mapk1ip1	-1.36471	3.00179	5.00966	0.0252062	0.196331
Cdk2ap1	0.964365	4.21316	5.01293	0.0251586	0.196331
Fkbp1b	2.9108	1.26016	5.01846	0.0250784	0.196331
Mmaa	-2.12554	2.67481	5.01275	0.0251613	0.196331
Zfp944	-1.46491	3.85144	5.0144	0.0251373	0.196331
Zfyve21	-2.44781	1.72551	5.01319	0.0251549	0.196331
Tbc1d14	-1.14248	4.80542	5.01068	0.0251914	0.196331
Ms4a1	-1.12678	8.9097	5.00986	0.0252033	0.196331
Ncapg2	2.44673	3.39975	5.01945	0.0250641	0.196331
Cd53	-0.892491	8.72982	5.01734	0.0250948	0.196331
Arhgap17	-1.02716	3.94907	5.00526	0.0252704	0.196591
rcc2	-2.54114	1.69854	5.00488	0.025276	0.196591
Cobll1	-2.25262	2.21497	5.00183	0.0253205	0.196654
Gm49284	-1.98997	1.73662	5.00225	0.0253144	0.196654
Rnaseh2b	1.0204	5.27347	5.00016	0.025345	0.196702
Gm31718	3.40436	1.15294	4.99766	0.0253816	0.196845
Tlcd2	-3.70298	1.8334	4.99555	0.0254126	0.196878
Akap12	-1.34015	3.53091	4.99231	0.0254603	0.196878
Sec23b	0.75567	5.47431	4.99115	0.0254772	0.196878
Cope	1.11128	5.96847	4.99213	0.0254629	0.196878
Pola2	1.0847	4.50447	4.99177	0.0254681	0.196878
Tmem209	-0.781721	4.60058	4.98545	0.0255613	0.197386
Gm15050	-3.93262	2.29764	4.97491	0.0257175	0.197602
Arpc3	0.772684	7.79256	4.97873	0.0256608	0.197602
Vdac1	-0.934445	5.4708	4.97691	0.0256878	0.197602
Gorasp2	-1.60649	3.63207	4.97954	0.0256488	0.197602
Tigd5	-4.14057	0.429884	4.98011	0.0256404	0.197602
Zfp942	-1.12928	4.30528	4.97555	0.025708	0.197602
Slc39a14	-2.24508	2.2762	4.9749	0.0257176	0.197602
St3gal5	2.23998	9.01507	4.96954	0.0257975	0.198075
Ccpg1	-1.38459	3.98933	4.96356	0.0258868	0.198075
E130215H24Rik	2.68315	1.1065	4.96651	0.0258427	0.198075
Gm27252	-6.25089	1.00052	4.96339	0.0258894	0.198075
Arl3	-1.42923	3.06222	4.96443	0.0258738	0.198075
Txnrd2	2.36203	8.716	4.96366	0.0258853	0.198075
Gm36328	-3.05611	2.38434	4.96027	0.0259362	0.198292
Irgm2	1.89554	5.17577	4.95719	0.0259824	0.198386
Mical3	1.91308	3.61981	4.95578	0.0260036	0.198386
Flna	0.956724	8.73536	4.95668	0.02599	0.198386
Haus8	0.867378	5.25729	4.95189	0.0260622	0.19863
Mid1ip1	1.00789	4.32734	4.95121	0.0260724	0.19863
Stx17	-1.15165	4.27197	4.94835	0.0261157	0.198818
Cep70	1.61272	3.4457	4.94459	0.0261724	0.198881
Ogfr	0.88778	6.95887	4.94604	0.0261505	0.198881
Zfp715	-1.08852	4.96851	4.94414	0.0261793	0.198881
Mettl27	1.77842	4.80603	4.94039	0.0262362	0.198905
Sucla2	-0.793708	5.40675	4.94029	0.0262377	0.198905
Kif22	2.00505	4.0372	4.94091	0.0262282	0.198905
Thg1l	1.3066	3.20253	4.93527	0.0263139	0.199342
Snx30	-1.16123	4.88116	4.93312	0.0263467	0.199374
Rpl7a	0.803159	9.7305	4.93257	0.0263551	0.199374
Foxd2os	2.2536	1.41501	4.93005	0.0263936	0.199525
Cdc34	0.970708	5.6343	4.92408	0.0264849	0.199533
Gm17066	-1.9729	3.49448	4.92556	0.0264623	0.199533
Sft2d2	-0.798256	6.07378	4.92393	0.0264872	0.199533
Gm12250	1.24856	6.90787	4.92587	0.0264575	0.199533
Cdan1	-1.73964	3.50819	4.9286	0.0264157	0.199533
Cabin1	1.38967	3.27506	4.91788	0.0265802	0.200094
Khdrbs1	-0.84273	6.41309	4.91217	0.0266681	0.200616
Mavs	1.30491	4.37679	4.91071	0.0266907	0.200646
Col27a1	-4.31508	0.778515	4.90079	0.0268444	0.201661
Akt3	-1.00484	5.79575	4.89923	0.0268687	0.201702
mt.Co3	-1.47933	2.94729	4.89495	0.0269354	0.201956
Taf1a	-1.63313	3.40645	4.89465	0.02694	0.201956
Alb	-11.7672	10.2259	4.88526	0.027087	0.202044
B9d2	1.60147	2.71528	4.89206	0.0269804	0.202044
Cxcr6	1.51743	5.29354	4.88782	0.0270469	0.202044
Gm10419	-2.66719	2.22314	4.88738	0.0270537	0.202044
Abhd15	-2.56458	1.89451	4.89034	0.0270074	0.202044
Mtrr	-1.23969	3.47173	4.88657	0.0270663	0.202044
Ewsr1	0.695892	7.32683	4.88572	0.0270797	0.202044
Gm16587	-5.23197	0.815674	4.88433	0.0271016	0.202044
Nr1d2	-1.23633	4.32685	4.87991	0.0271711	0.202341
Cox4i1	1.04909	8.15868	4.8794	0.027179	0.202341
Mettl18	-1.95769	2.64764	4.86556	0.0273979	0.202891
Haspin	1.6379	3.44977	4.86284	0.0274411	0.202891
Ivns1abp	-0.859702	6.8157	4.86448	0.0274151	0.202891
Rgs2	-1.00465	7.04992	4.86935	0.0273377	0.202891
Dhcr24	-1.49682	4.25592	4.87041	0.027321	0.202891
Dnah17	-4.89942	1.23126	4.86288	0.0274405	0.202891
Slc31a2	1.35734	4.9817	4.86771	0.0273638	0.202891
Atf7ip	-0.794757	5.74844	4.86757	0.027366	0.202891
Utp11	-1.13714	4.53788	4.87212	0.0272939	0.202891
Mapkapk3	0.923925	5.77791	4.87137	0.0273059	0.202891
Zc3h18	0.975404	4.06167	4.85352	0.0275898	0.20385
Adora2a	1.75115	2.82165	4.84036	0.0278011	0.203875
Crat	1.86705	6.69722	4.84475	0.0277304	0.203875
Tmem106a	1.35942	3.8696	4.85206	0.0276132	0.203875
Abtb1	1.31119	6.85156	4.84068	0.027796	0.203875
Pls1	-2.42249	4.58768	4.84751	0.027686	0.203875
Zfp235	-1.63094	2.66313	4.84489	0.0277282	0.203875
Zfp608	-1.2837	2.95228	4.84301	0.0277583	0.203875
Gm45418	-4.33517	1.38805	4.84816	0.0276757	0.203875
Galnt4	-1.42604	3.72911	4.84271	0.0277632	0.203875
Atg4a.ps	2.64612	2.00456	4.8413	0.027786	0.203875
Eid2b	-3.12567	1.15976	4.84261	0.0277649	0.203875
Pex3	-1.67994	3.41832	4.83377	0.0279076	0.204208
Ier3ip1	-1.0042	4.19765	4.83379	0.0279073	0.204208
Poldip2	-1.01947	4.5032	4.83168	0.0279413	0.204208
Cd200r4	1.88612	3.04012	4.83278	0.0279235	0.204208
Trappc5	-0.83361	4.64039	4.83589	0.0278732	0.204208
Cst7	1.31123	5.14273	4.82729	0.0280127	0.204425
Gpank1	1.12701	4.42193	4.82635	0.0280279	0.204425
Usf1	0.874225	5.79254	4.82761	0.0280075	0.204425
Slco4c1	-3.0299	1.50013	4.82352	0.028074	0.204599
Stk40	1.06809	4.57259	4.82256	0.0280896	0.204599
Hmmr	1.93712	3.59318	4.81849	0.028156	0.204805
Casc4	-2.30274	2.30258	4.81889	0.0281494	0.204805
Zfp386	-1.17525	5.14379	4.81506	0.0282121	0.204937
Pten	-0.895894	6.73368	4.81506	0.0282121	0.204937
Il1b	1.4425	8.17511	4.81214	0.0282599	0.205146
Ect2	2.65545	2.47665	4.80931	0.0283064	0.205207
Prkaca	-2.30946	2.29196	4.80953	0.0283028	0.205207
Itga2	-1.56872	4.21059	4.80555	0.0283682	0.205491
Parp1	-0.682314	6.57915	4.80461	0.0283836	0.205491
Fus	-2.72551	1.54142	4.79412	0.028557	0.206607
Ctc1	-1.56768	3.2472	4.7916	0.0285989	0.206771
Acp1	1.34413	7.45776	4.78926	0.0286377	0.206913
Emsy	-1.44544	3.70431	4.78337	0.0287358	0.207344
Sox6	2.21535	5.00993	4.78418	0.0287223	0.207344
Gstt3	-3.68978	1.30467	4.78218	0.0287557	0.207349
Ighv5.6	2.08273	1.42176	4.77712	0.0288404	0.20782
Rab3ip	-1.12304	3.87981	4.77593	0.0288602	0.207825
Ddx24	0.783281	6.50229	4.76847	0.0289855	0.207893
Rere	-0.944192	5.19319	4.76892	0.0289781	0.207893
Wdr95	3.28579	2.21687	4.76989	0.0289617	0.207893
Rcsd1	-0.826133	6.39719	4.77153	0.0289342	0.207893
Ppcdc	-0.870802	5.27479	4.77226	0.0289218	0.207893
Il18rap	1.12799	7.1517	4.77171	0.0289311	0.207893
Anxa8	3.1061	0.817039	4.76473	0.0290487	0.208208
Gm11110	2.72394	1.19115	4.76205	0.0290939	0.208255
Cxxc1	1.00163	4.6388	4.76222	0.029091	0.208255
Lman2	0.815725	6.37408	4.75607	0.0291951	0.208841
Tmem62	-1.2694	4.12985	4.7504	0.0292915	0.209391
Dcaf10	1.13673	5.19199	4.74911	0.0293135	0.20941
Bin1	-1.17173	7.13428	4.74682	0.0293526	0.209483
Zfp397	-1.14089	4.61877	4.74622	0.0293627	0.209483
Pnpla2	1.18622	4.42345	4.74152	0.029443	0.209641
Cbx7	-1.14998	3.57521	4.74216	0.029432	0.209641
Ccdc126	1.93144	2.00968	4.74241	0.0294279	0.209641
Pde3b	-0.817425	5.48147	4.73765	0.0295093	0.209697
Zfp81	-1.53184	3.2134	4.73927	0.0294815	0.209697
Nfkbie	1.06332	4.61847	4.73821	0.0294997	0.209697
lr4b	-1.20951	3.83533	4.73353	0.02958	0.210061
Hdac11	-3.0822	1.65355	4.73127	0.029619	0.210169
Plpbp	-0.820525	5.12869	4.72926	0.0296537	0.210169
Igkv14.126	-5.11393	1.43303	4.72931	0.0296527	0.210169
Egln1	0.862726	4.6122	4.72743	0.0296852	0.210254
Sc5d	-1.13093	4.88732	4.72419	0.0297411	0.210384
Pex19	0.910709	5.73234	4.72298	0.0297621	0.210384
Fcer1g	0.874	7.80188	4.72363	0.0297508	0.210384
9230116N13Rik	-2.2636	1.35677	4.7217	0.0297842	0.210402
Lmnb1	1.61744	4.69016	4.71796	0.029849	0.210722
Fancf	-2.67647	1.25507	4.71248	0.0299444	0.211231
Man1b1	-0.869669	4.99873	4.71156	0.0299604	0.211231
Hnrnpul1	-1.04764	4.64469	4.70183	0.0301305	0.212292
Creb1	-0.813814	6.06436	4.69784	0.0302005	0.212638
Ppm1k	-1.14908	4.63366	4.69655	0.0302232	0.212638
Ptpn12	-1.08831	5.90332	4.69566	0.0302388	0.212638
Tfec	-1.8229	3.02496	4.69187	0.0303056	0.212969
Myo18a	0.877025	4.65336	4.69	0.0303387	0.213063
Sh3pxd2b	4.09847	1.26554	4.68785	0.0303766	0.21319
Rab3il1	2.52333	5.60549	4.68086	0.0305006	0.213921
Mmp19	-1.63142	5.0638	4.6773	0.0305638	0.214089
Tm4sf1	-2.99524	2.26297	4.67727	0.0305643	0.214089
Tubgcp5	-1.38719	3.68447	4.6745	0.0306136	0.214295
Ptrh2	-1.26312	3.87384	4.67274	0.030645	0.214376
Kmt2b	1.63615	2.83708	4.66816	0.0307269	0.21473
Tgfb2	-4.10196	0.994684	4.66727	0.0307427	0.21473
Rpl5	-0.913801	10.2429	4.66656	0.0307554	0.21473
Cnst	-1.54252	6.78672	4.66406	0.0308002	0.214803
Gm13842	-2.93132	2.79037	4.66376	0.0308057	0.214803
Ptdss2	1.37779	4.33768	4.65713	0.0309248	0.215494
Rasal1	2.21387	1.30539	4.6503	0.031048	0.21576
Rev3l	-1.33153	4.94583	4.64875	0.0310761	0.21576
Aldob	-14.2758	5.99255	4.6539	0.0309831	0.21576
Slc7a5	2.0426	5.24995	4.6509	0.0310373	0.21576
Hsdl1	-0.874385	5.2453	4.64978	0.0310575	0.21576
Neurl3	-0.891916	6.15314	4.64811	0.0310878	0.21576
Amer1	-2.06638	2.16948	4.64726	0.0311031	0.21576
Tradd	1.43119	3.78966	4.64546	0.0311358	0.215848
Rnmt	1.00679	5.61268	4.63937	0.0312465	0.216043
Tmx2	-0.850003	4.66064	4.63976	0.0312393	0.216043
Tgfbr2	-0.690924	7.06956	4.6384	0.0312641	0.216043
Sugp2	1.20587	4.18419	4.63933	0.0312472	0.216043
Pepd	0.831327	6.17686	4.64204	0.0311978	0.216043
Crispld2	2.6179	4.0302	4.62497	0.0315098	0.216947
Fn3k	2.48111	2.84855	4.62508	0.0315077	0.216947
Prkca	-0.800056	4.78253	4.62378	0.0315317	0.216947
1110025M09Rik	-2.12117	1.96857	4.62529	0.0315039	0.216947
Zfp938	-1.94661	2.30773	4.62648	0.0314821	0.216947
Bcat1	3.51895	0.443483	4.62246	0.031556	0.216947
Kcnn4	0.964275	4.89094	4.62293	0.0315473	0.216947
Kremen2	3.51879	1.32718	4.62763	0.0314611	0.216947
Csrp2	-2.25158	3.15402	4.61607	0.0316738	0.217341
Jak3	1.93859	3.09466	4.61731	0.0316509	0.217341
Ddx20	-1.02692	4.46357	4.61678	0.0316605	0.217341
Zfp59	-1.31804	2.92371	4.605	0.0318789	0.21861
Tmsb4x	-1.30277	13.2618	4.60375	0.0319021	0.21863
Thoc6	1.26802	3.83796	4.60121	0.0319494	0.218669
Apoa5	-11.8024	3.49018	4.60018	0.0319687	0.218669
Fam78b	3.13001	1.4056	4.60115	0.0319505	0.218669
Zfp763	-1.8317	2.36848	4.59035	0.0321524	0.218973
Bckdhb	-2.16947	2.76028	4.58851	0.0321871	0.218973
Zfp296	2.44256	1.56286	4.58934	0.0321714	0.218973
Nupl2	-1.38429	2.73133	4.5919	0.0321234	0.218973
Tram1	-0.675493	7.05389	4.58855	0.0321863	0.218973
Rasa2	-1.17829	4.52183	4.58746	0.0322067	0.218973
Atp8b4	0.7743	6.19171	4.59651	0.0320371	0.218973
Gm15232	2.85867	1.48189	4.58721	0.0322115	0.218973
Cox14	1.15688	4.31347	4.58978	0.0321632	0.218973
Slc17a9	1.37848	2.85847	4.58695	0.0322163	0.218973
Plod3	1.01392	4.94599	4.58471	0.0322584	0.219121
Plpp1	2.70438	2.7796	4.58079	0.0323322	0.219232
Mknk2	0.873804	7.07123	4.58016	0.0323441	0.219232
Adam15	1.69887	3.61699	4.58028	0.0323419	0.219232
Kmt2e	-1.07895	4.4743	4.57953	0.032356	0.219232
Inafm2	-1.71352	6.10643	4.57168	0.0325047	0.220101
Dcaf6	1.93871	7.48422	4.55986	0.0327297	0.220543
Gabarapl1	-1.18028	6.54837	4.56362	0.0326579	0.220543
Mat1a	-13.1389	4.92584	4.55965	0.0327337	0.220543
Ccdc92	-2.25757	3.21854	4.56077	0.0327124	0.220543
Mrpl42	-1.17854	4.79566	4.56241	0.0326811	0.220543
Trit1	-1.18901	3.75395	4.56165	0.0326956	0.220543
Spsb3	0.974937	5.52651	4.56231	0.032683	0.220543
Serp1	-0.860613	8.75748	4.56187	0.0326914	0.220543
Slc9a6	-1.32587	3.86552	4.5553	0.0328171	0.220791
Zfp62	-0.962716	5.46046	4.55453	0.0328319	0.220791
Gm14326	-1.87821	2.9879	4.55596	0.0328044	0.220791
Lacc1	3.07833	0.969364	4.55007	0.0329173	0.220814
Ermap	2.66214	3.36	4.55038	0.0329114	0.220814
Sptbn1	-0.736328	7.13794	4.55013	0.0329162	0.220814
Armcx6	-2.64893	1.90397	4.55282	0.0328646	0.220814
Grpel2	-0.995669	4.62462	4.54812	0.0329549	0.220929
Trib3	2.35479	1.02503	4.54225	0.0330681	0.22155
Alox12	-1.83131	6.55325	4.54071	0.0330979	0.221612
Gad1	-3.16606	3.67815	4.53849	0.0331409	0.221624
Kcnab2	0.993168	6.08688	4.53894	0.0331321	0.221624
Igfbp2	-10.5343	2.46038	4.53617	0.0331857	0.221787
Orai1	1.28391	3.51486	4.5307	0.033292	0.222359
Vamp8	0.8725	6.85502	4.5244	0.0334149	0.222904
Vasp	0.807437	7.31031	4.52517	0.0333999	0.222904
Rhov	3.30809	0.499157	4.52101	0.033481	0.223069
Hint3	-1.29463	3.72437	4.52148	0.0334718	0.223069
Srsf6	-0.769482	7.18391	4.51279	0.0336424	0.224005
Yae1d1	-2.45387	2.43412	4.50806	0.0337354	0.224424
Kmt2a	-1.17677	4.88285	4.50748	0.0337469	0.224424
Prpsap2	-0.871951	5.04545	4.50209	0.0338534	0.224876
Wbp2	1.51514	4.442	4.50193	0.0338565	0.224876
Prmt5	0.976789	5.07418	4.50001	0.0338947	0.224991
Zfp719	-1.49496	3.16635	4.49435	0.0340071	0.225573
Rad1	-1.08988	3.95278	4.49349	0.0340242	0.225573
Med19	-1.05462	4.14052	4.48792	0.0341352	0.226169
Rpl18	0.862437	9.18955	4.48666	0.0341603	0.226196
Gpbp1l1	-0.830863	5.0848	4.48155	0.0342626	0.22653
Slc25a16	-1.89927	3.36865	4.47968	0.0343001	0.22653
Dock5	1.12494	4.04377	4.4789	0.0343158	0.22653
Fam26f	1.3799	4.46511	4.4824	0.0342456	0.22653
Ppil3	-1.38948	5.56882	4.4805	0.0342837	0.22653
Rrm1	0.979299	5.95085	4.47666	0.0343608	0.226689
Ifngas1	-2.61355	2.67474	4.47299	0.0344347	0.226909
4932441J04Rik	-5.95056	0.22997	4.47187	0.0344573	0.226909
P4ha2	-5.18977	0.546909	4.47214	0.0344519	0.226909
Actr6	-2.10353	3.34953	4.47021	0.0344908	0.226991
Mad2l1bp	1.01279	4.70394	4.46893	0.0345166	0.227022
Gm47792	-6.38708	0.365829	4.4659	0.0345778	0.227286
Rpl7.ps7	1.61618	1.59147	4.46474	0.0346014	0.227302
Tmem154	-0.779332	5.48366	4.4529	0.0348421	0.228744
Pou2af1	-0.7773	7.07108	4.44754	0.0349516	0.229044
Sirt2	0.895804	4.87825	4.44803	0.0349415	0.229044
Bcar3	-1.90938	2.62051	4.44945	0.0349124	0.229044
Man2a2	-0.836161	4.86393	4.44437	0.0350164	0.229254
Mgmt	-2.19316	2.03895	4.44344	0.0350355	0.229254
Cdt1	1.87177	2.45878	4.44286	0.0350474	0.229254
Pigh	-1.37912	3.73684	4.44097	0.0350863	0.229369
Zfp868	-0.995822	4.19282	4.43964	0.0351137	0.22941
Psma2	0.687553	7.75208	4.43779	0.0351516	0.229518
Btbd1	-0.736904	6.22019	4.43631	0.0351822	0.229576
Ctnnbip1	1.97774	2.15117	4.4353	0.0352031	0.229576
Ctdsp1	-0.957951	4.41601	4.42867	0.0353401	0.230191
Nans	1.08531	5.34952	4.42886	0.0353361	0.230191
Surf4	0.768694	6.25162	4.42182	0.0354822	0.230977
Dstn	1.75003	7.74254	4.41757	0.0355707	0.231222
Zfand2b	1.13017	4.38973	4.4176	0.0355701	0.231222
Mpl	-1.70937	4.51319	4.41692	0.0355841	0.231222
Cavin2	-1.74653	6.55704	4.4099	0.035731	0.231897
Tuba8	-2.05415	3.35971	4.4102	0.0357246	0.231897
Mob4	-0.705599	5.47263	4.40547	0.0358239	0.232359
Sfxn1	-0.927351	5.68755	4.39736	0.0359947	0.232803
1110028F11Rik	-2.83719	2.43081	4.39991	0.0359408	0.232803
Zfp644	-1.13718	4.4622	4.39789	0.0359835	0.232803
Ankrd10	-0.759369	5.40994	4.40101	0.0359177	0.232803
D930028M14Rik	-4.4387	0.641707	4.3971	0.0360002	0.232803
Slc25a15	-1.78924	3.49022	4.39549	0.0360341	0.232882
Zfand3	-1.08458	5.6954	4.39343	0.0360778	0.233025
Apoo	-2.68565	2.49931	4.39196	0.0361089	0.233086
Pck1	-5.87543	2.94117	4.39025	0.0361451	0.23318
Ly86	-0.827884	7.42648	4.38722	0.0362093	0.233402
Timm21	-1.31143	3.83027	4.38659	0.0362227	0.233402
Cep68	-1.16185	3.88327	4.38302	0.0362986	0.233542
Dmxl1	-1.25652	5.15054	4.38251	0.0363094	0.233542
Dnajb5	3.01989	0.989111	4.38351	0.0362882	0.233542
Rpap1	1.88399	1.9772	4.37904	0.0363834	0.233878
Psmd10	0.936669	5.5205	4.37435	0.0364838	0.234301
Capn5	1.2873	3.35201	4.37393	0.0364926	0.234301
Dlgap4	1.13481	4.07099	4.37106	0.0365541	0.234318
Rplp2	1.18443	8.0171	4.36892	0.0366001	0.234318
Aff3	-1.84932	3.83961	4.36874	0.036604	0.234318
Nr1h2	1.15414	4.20123	4.36928	0.0365924	0.234318
Ifi204	1.028	8.05802	4.37203	0.0365333	0.234318
Cdk13	-1.12595	4.42504	4.36378	0.0367108	0.234862
Dhrs13	2.86762	1.25227	4.359	0.036814	0.235382
Ndufs8	0.849001	5.58298	4.35759	0.0368445	0.235438
Aktip	-1.01776	3.55608	4.35631	0.0368722	0.235475
Klhl18	1.30514	3.07729	4.34966	0.0370162	0.236255
Alg11	1.30486	3.46823	4.34771	0.0370588	0.236387
Grk3	1.48346	5.2383	4.34367	0.0371467	0.236807
Gm15772	-1.04059	3.20724	4.33669	0.0372993	0.23764
Pcmt1	-1.08117	7.37414	4.33437	0.0373502	0.237823
AW112010	1.22996	8.74465	4.33135	0.0374166	0.238106
Gm38329	-4.39626	0.960882	4.32996	0.0374471	0.238159
Acot1	-3.69061	1.55539	4.32401	0.0375782	0.238571
Tpst2	0.967162	5.17194	4.32472	0.0375627	0.238571
Mcrip2	-3.3343	0.835714	4.32553	0.0375446	0.238571
Sord	-1.39946	7.04409	4.31892	0.0376908	0.238583
Fggy	-3.40578	1.82698	4.32011	0.0376645	0.238583
Ctu2	1.73564	2.8145	4.32179	0.0376274	0.238583
Usp34	-0.745014	6.50838	4.31966	0.0376744	0.238583
Aspm	2.50097	2.93704	4.32137	0.0376367	0.238583
Adprm	-0.914103	4.53328	4.31484	0.0377813	0.23889
Jcad	-3.2155	1.21225	4.31465	0.0377855	0.23889
Fundc1	-0.962616	4.64703	4.31374	0.0378058	0.23889
Acbd6	-1.22405	3.51471	4.31218	0.0378404	0.238969
Gm4956	-1.66953	2.85651	4.31101	0.0378665	0.238994
Hsd17b10	-0.820957	5.49976	4.30996	0.0378899	0.239001
Sp140	0.795982	7.54665	4.30828	0.0379272	0.239097
Cdk8	1.02579	4.86345	4.30572	0.0379845	0.239318
Agpat2	-1.5332	3.73758	4.30335	0.0380373	0.239511
Gstt1	-3.31607	5.00385	4.30158	0.0380769	0.23962
Tmem167	-0.845205	5.82734	4.29755	0.0381673	0.240049
Mettl26	-1.89831	2.87252	4.29577	0.0382074	0.240161
Gzma	1.2781	9.50551	4.28481	0.0384544	0.241573
Elp5	0.923993	5.61637	4.28207	0.0385163	0.241582
Zfp930	-1.24588	3.81491	4.28177	0.0385231	0.241582
Serping1	-5.11784	4.4087	4.28221	0.0385132	0.241582
Max	-1.07499	6.57296	4.27822	0.0386039	0.241947
Mctp2	-0.969346	4.34733	4.27511	0.0386745	0.24225
M1ap	1.98489	3.12169	4.27409	0.0386977	0.242254
Fam20b	-0.916874	4.80607	4.2705	0.0387795	0.242625
Ube2d2a	-0.911611	5.3547	4.26712	0.0388568	0.242968
2600006K01Rik	2.47379	2.40654	4.26536	0.038897	0.243078
Slc16a10	1.77545	7.27102	4.26168	0.0389815	0.243465
Hectd4	2.11005	5.60523	4.25839	0.039057	0.243513
Casp6	-0.98936	3.85133	4.25903	0.0390422	0.243513
Zfp276	0.990338	4.6322	4.26016	0.0390163	0.243513
Sec11c	-0.840744	7.03875	4.25713	0.0390858	0.243552
Tmem86a	-2.02845	2.6882	4.25592	0.0391138	0.243586
Gm9625	1.30504	2.40015	4.2514	0.0392181	0.243958
Kmt2c	-1.06384	4.95658	4.25136	0.0392188	0.243958
Mbnl2	-0.970454	6.55324	4.24822	0.0392916	0.244269
Chst10	-1.44862	3.62303	4.23023	0.0397102	0.244567
Dmtn	2.18839	4.33143	4.24405	0.0393881	0.244567
Dpp4	-0.721776	6.30954	4.23348	0.039634	0.244567
Gm20324	-2.52375	1.13719	4.22881	0.0397433	0.244567
Zfp956	-1.54026	3.41595	4.23307	0.0396436	0.244567
Abhd6	-2.51482	2.21602	4.23773	0.039535	0.244567
Iqcc	-1.10722	3.61155	4.24263	0.0394211	0.244567
Vim	0.89942	9.2326	4.23002	0.039715	0.244567
Slc26a11	-1.91532	2.69533	4.24049	0.0394707	0.244567
Fbxo44	-4.31827	1.10998	4.23246	0.0396578	0.244567
Pdhb	-0.702598	5.91318	4.23392	0.0396238	0.244567
Firre	-2.2218	1.90408	4.23619	0.0395709	0.244567
Irgm1	0.99139	8.25617	4.23055	0.0397025	0.244567
Them4	-2.35062	1.37991	4.23101	0.0396919	0.244567
Bahd1	-1.20808	3.34152	4.23863	0.039514	0.244567
Arf2	0.926728	5.69405	4.24074	0.039465	0.244567
A730089K16Rik	-2.27127	3.66012	4.22862	0.0397478	0.244567
Clic5	3.4755	2.19601	4.23204	0.0396678	0.244567
Rab20	1.84672	3.16637	4.22576	0.0398148	0.244839
1110008P14Rik	1.19194	3.86652	4.22377	0.0398615	0.244987
C230096K16Rik	-2.20162	1.53146	4.21685	0.0400243	0.245623
Ap2s1	1.06432	4.78522	4.21647	0.0400333	0.245623
Ap1s1	1.24734	3.96597	4.21737	0.0400122	0.245623
Tdo2	-10.2989	2.38406	4.21289	0.0401179	0.246001
Esyt1	0.802887	7.58362	4.20942	0.0402001	0.246086
Klhl42	-1.02366	4.44454	4.20955	0.0401971	0.246086
H2afv	0.836827	4.83999	4.20951	0.0401979	0.246086
Gm20506	-1.79933	2.68383	4.2042	0.0403241	0.246572
Trpm4	2.07518	1.79716	4.20415	0.0403252	0.246572
Cd79a	-1.18309	4.2455	4.19853	0.040459	0.247054
Arid4b	-1.17857	5.05347	4.19944	0.0404374	0.247054
Gstp1	1.14467	5.52253	4.19795	0.0404728	0.247054
Swsap1	-1.58752	2.46312	4.19264	0.0405999	0.24747
Diexf	-1.28562	3.57827	4.19222	0.0406099	0.24747
Hist1h2ac	-2.13821	5.20411	4.19242	0.0406051	0.24747
Rpl34	0.801631	9.54214	4.18658	0.0407453	0.248155
Rgn	-10.9858	3.05378	4.18366	0.0408155	0.248442
Traf1	0.988776	4.62161	4.17871	0.0409348	0.249028
Snx1	0.664547	6.87719	4.17696	0.0409771	0.249144
Zcchc24	-2.11061	2.46477	4.17483	0.0410287	0.249318
Rnf2	-0.985234	5.31643	4.16931	0.0411626	0.249835
Ctso	-0.776821	5.92442	4.16845	0.0411834	0.249835
Zfp60	-1.81137	3.70306	4.1685	0.0411823	0.249835
Tbrg4	-2.19247	1.92518	4.16726	0.0412125	0.249871
Sod2	1.27664	7.57935	4.16146	0.0413537	0.250379
Cd300a	0.910425	6.2356	4.16096	0.041366	0.250379
Polr1b	-0.831762	4.116	4.16102	0.0413646	0.250379
Fndc3a	-0.834337	4.96343	4.15647	0.0414757	0.250902
Ppp4r3a	-0.765823	6.04521	4.15208	0.0415834	0.251272
Snx33	-1.83303	2.14083	4.15263	0.0415698	0.251272
Mfsd4b4	-2.86834	1.5818	4.14807	0.0416821	0.251305
Cluh	-1.61713	3.52504	4.14832	0.0416759	0.251305
Gm12481	1.56813	2.10394	4.14833	0.0416755	0.251305
Tpsb2	4.17519	2.02827	4.14896	0.0416602	0.251305
Clta	0.626333	7.21485	4.1394	0.0418959	0.252453
1810006J02Rik	-2.86717	1.42375	4.13714	0.0419519	0.252649
Pycard	1.09703	6.98303	4.13262	0.0420642	0.253184
Mtmr4	-1.18939	3.78548	4.13052	0.0421164	0.253283
Gm11274	-3.24146	3.40437	4.13007	0.0421277	0.253283
Igsf6	0.801456	7.36718	4.12621	0.0422239	0.25372
Fkbp9	-3.51088	1.76579	4.12405	0.0422777	0.253784
0610009O20Rik	-1.63546	2.88473	4.1239	0.0422816	0.253784
Chil1	1.64355	5.564	4.12017	0.0423749	0.254194
Ccdc86	1.82532	3.0381	4.11928	0.0423971	0.254194
Chic1	-2.25332	1.51296	4.11771	0.0424366	0.254289
Efcab2	-2.01887	2.55402	4.1116	0.04259	0.254339
Epm2aip1	-1.36932	4.27901	4.11481	0.0425093	0.254339
Dtd1	-1.27769	3.4457	4.11546	0.0424929	0.254339
AA986860	3.10882	1.43848	4.11085	0.042609	0.254339
Epor	2.85402	1.22799	4.11081	0.0426101	0.254339
Acadm	-0.774946	5.18081	4.11418	0.0425252	0.254339
Abhd17b	-0.7959	5.80575	4.1128	0.0425598	0.254339
Mif	1.24896	4.32371	4.10864	0.0426646	0.254523
Stim2	-0.992103	4.27928	4.10675	0.0427123	0.254596
Apoc3	-12.3102	3.92728	4.10629	0.042724	0.254596
Lpar6	-1.25921	5.21415	4.10434	0.0427734	0.25475
Scamp3	1.54079	2.30156	4.10014	0.0428796	0.255241
Slc35c1	-1.80584	2.20582	4.09462	0.0430199	0.255794
Ptpro	0.884622	5.37569	4.09541	0.0429997	0.255794
Baz2b	-0.810378	4.93451	4.09176	0.0430928	0.256086
Tmcc3	-2.11325	2.51637	4.08961	0.0431475	0.25627
Ifi47	0.969869	8.65465	4.08585	0.0432437	0.256559
Myof	1.5022	4.7603	4.08614	0.0432364	0.256559
Scarb1	1.30479	4.48125	4.08035	0.0433847	0.257236
Ffar2	2.38997	2.6887	4.07953	0.0434056	0.257236
Mfsd11	-2.00392	2.63259	4.07773	0.0434521	0.257238
Fam213b	-2.71918	1.57872	4.07767	0.0434536	0.257238
Gm11346	-0.986271	5.26793	4.07578	0.0435022	0.257384
Tnfaip1	-1.43478	3.46304	4.0745	0.0435351	0.257437
Hist3h2a	-2.17172	3.44136	4.07089	0.0436284	0.257848
Mrps14	0.776141	5.4908	4.06956	0.0436626	0.257908
Fcrl5	1.19661	4.4117	4.0685	0.0436899	0.257929
Mgst1	-0.995043	6.8833	4.06662	0.0437388	0.258076
Tspan2	-1.77325	5.51542	4.06537	0.0437712	0.258126
Pgrmc2	-1.30364	3.72895	4.06355	0.0438183	0.258262
Cyp2e1	-6.80826	4.61875	4.06242	0.0438476	0.258293
Zswim4	1.65017	2.81561	4.06032	0.0439021	0.258473
Tacc3	1.81676	2.661	4.05791	0.0439648	0.25856
Aprt	1.12404	5.17019	4.05862	0.0439464	0.25856
Lca5	2.38452	1.71965	4.05665	0.0439977	0.258613
Gbp10	2.44474	3.56736	4.05446	0.0440548	0.258807
Zcchc11	-0.81151	5.27391	4.05225	0.0441125	0.258888
Gatm	3.28401	1.38775	4.05209	0.0441167	0.258888
Ranbp9	-0.634319	6.06227	4.05006	0.0441697	0.258917
Pimreg	2.63689	2.06212	4.05087	0.0441487	0.258917
Fam3c	-0.820035	5.17968	4.04613	0.0442728	0.259381
Pcmtd2	-0.948787	5.47368	4.04299	0.0443552	0.259723
Hpd	-13.2716	4.90663	4.04158	0.0443923	0.259753
Lck	0.901325	7.89409	4.04019	0.0444288	0.259753
Mrps33	-1.46767	3.92286	4.04004	0.0444326	0.259753
Wfdc21	-2.32193	5.6051	4.03009	0.0446956	0.260958
Fes	0.892463	6.28866	4.02824	0.0447446	0.260958
Sh2b1	-1.66704	2.69671	4.02572	0.0448115	0.260958
Phf20	-0.812476	4.70902	4.02624	0.0447977	0.260958
Pef1	0.937197	5.07373	4.02484	0.044835	0.260958
Tdpx.ps1	2.14554	2.42572	4.02312	0.0448807	0.260958
Ets1	-0.774254	7.03937	4.03127	0.0446643	0.260958
Ccnl1	-0.892254	6.18186	4.02746	0.0447652	0.260958
Slc37a2	-1.1129	4.22295	4.02433	0.0448484	0.260958
Jade1	-1.57794	3.37478	4.02311	0.0448809	0.260958
Samsn1	0.749606	6.48968	4.02194	0.0449119	0.260997
Atp6v0d1	0.923609	6.68386	4.01818	0.0450123	0.261287
Ndufaf4	-1.14444	3.80368	4.01585	0.0450745	0.261287
Id2	1.10451	6.39403	4.01711	0.0450409	0.261287
Dctn1	0.979564	4.17626	4.01554	0.0450829	0.261287
Fbxw9	-3.32001	1.28878	4.01748	0.045031	0.261287
Htra1	-4.86404	1.10707	4.01277	0.0451568	0.261434
Taok3	-1.4884	2.57501	4.01341	0.0451396	0.261434
Psmc4	-0.825051	4.54201	4.00892	0.0452603	0.261876
Hip1	0.85505	4.95575	4.00812	0.0452816	0.261876
Fn3krp	1.32746	3.37028	4.00538	0.0453553	0.262161
Zfp706	-0.745374	6.52412	3.99448	0.0456494	0.262479
Apob	-12.9797	4.71215	3.99073	0.0457512	0.262479
Npm1	-0.739076	8.58151	3.99137	0.0457338	0.262479
Eif3k	0.934876	8.9079	3.99273	0.0456971	0.262479
Zfp451	-0.944174	4.42597	3.99487	0.045639	0.262479
Nhlrc4	2.87794	1.32176	4.0013	0.0454652	0.262479
Mapk7	2.52248	1.16684	3.99423	0.0456562	0.262479
Samd11	2.27953	4.58537	3.99753	0.0455671	0.262479
Ccdc62	-2.22341	1.58028	3.99278	0.0456955	0.262479
Plekhm2	1.65796	2.62888	3.99077	0.0457501	0.262479
Lfng	0.903109	6.33634	3.99339	0.0456791	0.262479
Mllt3	1.2807	7.69233	3.99975	0.0455069	0.262479
Pros1	-1.21213	5.8255	3.99137	0.0457339	0.262479
Sar1b	-0.899053	4.84216	3.99288	0.0456929	0.262479
Rpl37	0.809035	9.29173	3.98812	0.0458221	0.262563
Thrsp	-5.63459	2.96641	3.98887	0.0458016	0.262563
Agap1	2.07245	1.23174	3.98751	0.0458389	0.262563
Nelfe	-1.1527	3.60567	3.98058	0.0460278	0.263505
Tcp11l1	-2.276	2.48159	3.97533	0.0461714	0.263767
Cdadc1	-1.09849	3.76466	3.97725	0.0461188	0.263767
Dnajb2	1.82478	8.05392	3.97581	0.0461583	0.263767
Acat1	-0.808486	5.88174	3.97543	0.0461687	0.263767
Phc3	-0.941676	4.89027	3.97174	0.04627	0.264073
Psd3	-2.31993	2.26122	3.97159	0.046274	0.264073
Irf7	1.3425	9.14712	3.97034	0.0463083	0.264129
Zmynd11	-0.926592	4.44436	3.96834	0.0463635	0.264304
Gm9958	-2.13675	1.46856	3.96614	0.0464241	0.264509
Itgb3bp	-1.34258	2.82067	3.96319	0.0465055	0.264833
Urb2	-1.294	3.7401	3.96075	0.0465729	0.264937
Gpm6a	3.06532	0.82713	3.96097	0.046567	0.264937
2900076A07Rik	-1.84847	2.38151	3.95823	0.0466427	0.265194
Mir142hg	1.35199	4.32965	3.95283	0.0467927	0.265285
Tmem176b	-1.6226	4.71925	3.95234	0.0468064	0.265285
Kri1	0.803255	5.17845	3.9543	0.0467517	0.265285
Fancm	-1.85809	2.92889	3.95409	0.0467577	0.265285
Psme4	0.928217	7.47585	3.95465	0.046742	0.265285
Mcemp1	1.12112	7.52768	3.95543	0.0467205	0.265285
Htatsf1	-0.955579	4.80849	3.95133	0.0468344	0.265305
Sptssa	-0.748367	4.87441	3.9464	0.0469717	0.26566
2011-09-01	0.824881	5.71241	3.94771	0.0469351	0.26566
Tap2	0.954241	5.73565	3.94473	0.0470184	0.26566
Psen1	0.606277	6.05755	3.94498	0.0470115	0.26566
Dock11	-0.661515	7.24622	3.94466	0.0470203	0.26566
Bsg	1.39605	9.74777	3.94287	0.0470703	0.265712
Taf15	-1.85031	1.90155	3.9395	0.0471648	0.265712
Rufy2	-1.08241	3.6665	3.94081	0.047128	0.265712
Acot7	1.01385	4.85291	3.93817	0.0472021	0.265712
Gar1	1.81326	1.50163	3.9388	0.0471843	0.265712
Cystm1	-5.2962	1.5278	3.93918	0.0471737	0.265712
Itsn2	-0.626061	6.9866	3.94096	0.0471239	0.265712
Smarca2	-0.934895	4.35438	3.93642	0.0472514	0.26584
Pstpip1	0.848393	6.41375	3.9356	0.0472742	0.26584
Npc1	-0.843722	4.83562	3.93323	0.047341	0.266077
Slc7a6os	-1.25147	3.74393	3.92829	0.0474801	0.266685
1500026H17Rik	-2.04858	1.77375	3.92764	0.0474985	0.266685
Haus2	-1.05684	3.55064	3.92293	0.0476317	0.267293
Pias2	-1.09181	4.39251	3.92103	0.0476857	0.267457
Zc3hav1	0.755574	8.34585	3.91713	0.0477965	0.267939
5530601H04Rik	0.899613	4.42955	3.91412	0.0478821	0.268279
Hsd17b11	-1.04409	4.17919	3.91272	0.0479219	0.268363
Klf7	-2.71017	1.84965	3.91169	0.0479512	0.268388
Pdp1	-1.43774	3.27131	3.90998	0.0480002	0.268522
Ica1	3.26119	1.20095	3.907	0.0480853	0.268859
Srpk3	-1.20203	3.85289	3.90118	0.0482523	0.269652
Zfp511	-1.13651	3.58074	3.89943	0.0483026	0.269694
Rplp1	0.991222	8.75721	3.89862	0.0483257	0.269694
Mterf1a	-1.52803	2.98647	3.89779	0.0483497	0.269694
S100a16	-4.16227	1.44828	3.8957	0.0484098	0.269694
Got2	-0.976919	5.43746	3.89586	0.0484052	0.269694
Noc2l	-0.902163	4.52736	3.89665	0.0483824	0.269694
B3galnt2	-0.829502	4.83981	3.89262	0.0484988	0.269911
Rps28	0.711078	8.30884	3.89315	0.0484834	0.269911
Kif2a	-1.18811	7.0064	3.87948	0.0488796	0.270911
Usp19	0.811582	5.5521	3.88189	0.0488097	0.270911
Dcaf17	-1.40934	3.81407	3.88078	0.0488419	0.270911
Tiprl	0.959576	4.66084	3.88072	0.0488436	0.270911
Tnfrsf9	1.89604	3.72143	3.87971	0.0488729	0.270911
Gm13509	1.37386	2.18293	3.88415	0.0487439	0.270911
Ap1g2	1.27201	2.93445	3.88224	0.0487995	0.270911
Arhgap1	0.961387	4.64903	3.87949	0.0488795	0.270911
Arhgap11a	1.34263	3.65557	3.87807	0.0489208	0.271
Smim19	-2.07805	2.25509	3.87696	0.0489532	0.27104
Gm12185	2.07041	4.52379	3.87533	0.0490006	0.271164
Angpt1	-2.36862	4.79016	3.8721	0.049095	0.271547
Acaa2	-1.1275	5.91459	3.87106	0.0491254	0.271575
Hspa1a	3.1506	0.95339	3.8657	0.0492827	0.272225
Sfmbt1	-0.970878	3.69539	3.86533	0.0492934	0.272225
Poc1a	2.19722	2.42115	3.8636	0.0493444	0.272347
Epha2	3.78506	1.62355	3.86286	0.0493661	0.272347
Agap2	1.28581	3.83728	3.85791	0.0495119	0.273012
Slc6a13	-3.19822	2.53343	3.85269	0.0496664	0.273724
Abi3	1.4476	3.60013	3.85148	0.0497022	0.273781
Acss1	-0.792365	5.85151	3.84885	0.04978	0.274053
Dda1	1.16234	3.76	3.8481	0.0498024	0.274053
Rps6ka1	0.776823	6.40737	3.84543	0.0498817	0.27421
Pbx3	1.91017	2.3055	3.84589	0.0498682	0.27421
Dzip1	-1.80138	3.36656	3.84282	0.0499594	0.274357
Neil1	-1.24969	3.41975	3.84339	0.0499426	0.274357
Rnf219	-1.9191	2.76636	3.84184	0.0499887	0.274378
Rbp4	-13.0045	4.51652	3.84003	0.0500426	0.274426
Papd5	-1.18729	4.6788	3.83983	0.0500485	0.274426
Chic2	0.906584	6.01759	3.82788	0.0504066	0.275689
Dbi	-1.37758	5.34118	3.82828	0.0503947	0.275689
Me1	-3.7787	1.38055	3.82877	0.0503798	0.275689
Steap4	-1.57252	3.29358	3.82805	0.0504016	0.275689
Klri2	-1.73991	4.74962	3.82862	0.0503845	0.275689
Tbcel	1.50357	5.78092	3.82123	0.0506071	0.27609
Spo11	-3.13987	2.51898	3.81632	0.0507557	0.27609
Ctsc	0.726816	8.18499	3.81685	0.0507396	0.27609
Sesn1	-0.73021	6.35984	3.82016	0.0506395	0.27609
Cep57	-0.863726	4.62064	3.82399	0.0505238	0.27609
Cd6	0.996343	5.02343	3.81612	0.0507616	0.27609
Kxd1	0.933772	5.50862	3.81755	0.0507183	0.27609
Gm38331	5.53716	4.72335	3.81841	0.0506924	0.27609
Ccnc	-0.945148	4.15925	3.82039	0.0506325	0.27609
Hgf	-2.47524	2.0155	3.82024	0.0506369	0.27609
Ss18l2	-2.22653	2.55235	3.82295	0.0505551	0.27609
Csrp1	-0.928905	5.90702	3.81128	0.0509085	0.276749
Ebf1	-1.11016	3.9905	3.80991	0.0509503	0.276837
9530026F06Rik	-3.11601	2.09216	3.80805	0.0510068	0.277004
Atg4a	1.92194	9.18456	3.80267	0.0511708	0.277709
Crim1	-2.25585	2.42115	3.80211	0.0511881	0.277709
Ing3	-0.929377	4.2545	3.80022	0.0512459	0.277864
Sec63	-0.701148	5.47333	3.79949	0.0512682	0.277864
Srgap3	-3.02262	1.4466	3.79589	0.0513785	0.277961
Slc22a15	-1.93817	2.60859	3.7947	0.0514151	0.277961
Rtn3	-0.738497	6.60607	3.7947	0.0514151	0.277961
Trnt1	-0.830479	5.2669	3.79654	0.0513587	0.277961
Mterf2	-1.43176	2.95029	3.79676	0.0513517	0.277961
Gm46430	-1.18643	3.78074	3.79349	0.0514523	0.278023
Psmc5	0.818153	6.01814	3.79052	0.0515437	0.278377
Hhex	-1.53971	3.58552	3.78598	0.0516837	0.278994
Zfp955b	-3.21218	1.71238	3.7851	0.0517107	0.279
Dguok	-0.669593	4.6684	3.78235	0.051796	0.279049
[truncated: 8,781 more rows]

## Sheet: PcAS_Late-Early
SYMBOL	logFC	logCPM	LR	PValue	FDR
Braf	-0.14662	4.68803	0.0979795	0.754268	1
Mis18bp1	1.07456	2.79977	0.999092	0.31753	1
Cpsf7	0.623659	5.03968	1.72311	0.189293	1
Mef2c	-0.0754191	6.36701	0.0284166	0.866133	1
Usp8	0.30799	5.93224	0.540019	0.462425	1
Rtel1	-0.0396228	4.5239	0.00689096	0.933842	1
Bccip	0.165012	5.15293	0.201974	0.653132	1
Tmem120a	-0.210392	3.02236	0.059116	0.807899	1
Ppwd1	0.159283	3.64446	0.059636	0.807072	1
Nhlrc2	-0.261862	3.68561	0.252551	0.615285	1
Elf4	0.074113	3.23777	0.0149796	0.902589	1
Fzd5	-0.295365	2.23042	0.0945401	0.758483	1
Ppp1r15a	0.508673	7.64373	0.327853	0.566926	1
Lonp1	-0.497708	4.92723	0.942728	0.331577	1
Rps20	0.331623	9.94551	0.836397	0.360429	1
Rffl	0.0753191	4.22239	0.0180708	0.893064	1
Narf	0.809796	6.24663	1.66931	0.196352	1
ab2	-0.251457	5.12652	0.342462	0.558412	1
Cenpn	0.570151	2.31796	0.201593	0.653438	1
Itgb3bp	0.629115	2.82067	0.957348	0.327856	1
Zfp335os	-0.943475	1.42843	0.697605	0.403589	1
Cpq	-0.0701935	4.42065	0.00730404	0.931893	1
Otud5	0.230756	8.11604	0.182998	0.668809	1
Zscan21	-0.103623	3.52881	0.0321386	0.857724	1
Baz2a	-0.253392	4.42413	0.362745	0.546986	1
Uhrf1	0.0358896	3.54261	0.00182825	0.965894	1
2610301B20Rik	0.140294	2.62739	0.0202764	0.886768	1
Gm48161	-3.06359	2.58601	4.00899	0.0452582	1
Agtrap	-0.530691	5.14572	1.55181	0.212869	1
Fmnl3	0.409138	2.92735	0.225407	0.634951	1
Swsap1	-0.334876	2.46312	0.237806	0.625795	1
Pcgf6	0.181228	3.32086	0.0767259	0.781784	1
Luc7l	0.0460912	5.49195	0.0132411	0.90839	1
Cbx1	0.203756	5.07314	0.139141	0.709136	1
Plrg1	-0.476108	5.64453	2.08679	0.148578	1
Wfdc21	0.381983	5.6051	0.118851	0.730284	1
Lrrc14	-0.239663	3.10889	0.119019	0.730101	1
Naa15	0.157291	5.57148	0.124601	0.724097	1
Zfp157	0.121803	3.76457	0.030312	0.861784	1
Abcd4	0.121301	1.79626	0.0165	0.897791	1
Fbxl19	0.307128	2.98164	0.165415	0.684219	1
Rpe	0.0184061	5.11573	0.0016643	0.967459	1
Slc35f6	-0.336061	3.96923	0.329528	0.565937	1
Efemp1	2.25028	1.65385	1.27753	0.258359	1
Gtf3a	-0.123667	5.131	0.10992	0.740235	1
Noc3l	0.0479192	3.4283	0.00389542	0.950234	1
Dnajc15	0.375162	6.24908	0.572135	0.449412	1
Tceal8	-0.0171678	5.06703	0.000363778	0.984783	1
Gm7331	0.434051	3.00507	0.251234	0.616208	1
Trib1	0.183408	2.17922	0.0343425	0.85298	1
Nat2	0.526486	4.10209	0.489519	0.484142	1
Zfp952	-0.17237	4.22491	0.101163	0.750438	1
Map3k5	0.209967	5.70968	0.278644	0.597591	1
Dync1i2	0.0625015	6.12378	0.0392785	0.842898	1
Ttc19	0.536033	2.26189	0.230975	0.630802	1
Med19	0.526085	4.14052	1.19169	0.274988	1
Gpsm3	-0.111447	2.51388	0.0276768	0.867871	1
Stmn1	0.721071	5.58048	1.05185	0.305082	1
Mtmr3	0.634504	8.62151	1.08312	0.298	1
Prmt7	-0.82121	3.85808	2.60797	0.106328	1
Pgap1	1.0195	5.31143	3.58672	0.0582431	1
Ccl9	0.797185	7.52539	1.60913	0.204614	1
Abl1	0.72043	2.68763	0.914571	0.338904	1
Sord	-1.31446	7.04409	3.83696	0.0501343	1
Rnf114	0.734165	9.48395	1.60271	0.20552	1
Crlf3	-0.0222393	7.38306	0.00412459	0.948793	1
Spop	0.275906	7.94202	0.287143	0.592057	1
Gadd45b	-0.412349	3.90028	0.347624	0.555461	1
Slc4a7	0.572585	4.93206	1.50043	0.220605	1
Taf11	0.672679	3.64779	1.43726	0.230583	1
Tpgs2	0.00339666	3.83215	3.7105e-05	0.99514	1
Zfp940	0.29116	2.19009	0.0963191	0.756292	1
Chst10	-1.10116	3.62303	2.63004	0.104859	1
Cd82	0.627071	7.35673	1.20528	0.272269	1
Eftud2	-0.0539318	5.58946	0.0218618	0.882455	1
Ric8b	-0.346143	3.7418	0.256042	0.612853	1
Grwd1	0.497341	3.16703	0.428628	0.512663	1
Urgcp	-0.395224	3.77212	0.345982	0.556396	1
Zfyve9	0.0799319	3.79105	0.00880238	0.925251	1
Spon1	-0.707795	2.5832	0.58642	0.443807	1
Rcbtb2	0.175182	5.26533	0.167948	0.681942	1
Clic4	-1.09601	7.23589	3.91909	0.0477408	1
Tnpo2	-0.0213134	4.71534	0.00221137	0.962493	1
Rpl23	0.591977	10.5508	2.2736	0.131594	1
Srbd1	0.483319	3.70927	0.752712	0.385619	1
Ugt1a7c	0.0932155	3.78522	0.0143561	0.904628	1
Mapk8	-0.187123	3.89031	0.0988517	0.753212	1
kr8	0.270818	2.39756	0.121488	0.727426	1
Cops3	-0.0167663	5.62845	0.00153981	0.968699	1
Tcf3	-0.547775	3.99721	1.11034	0.292008	1
Rpl7	0.291012	11.2079	0.458562	0.498297	1
1110051M20Rik	-1.19298	1.25147	0.756185	0.384525	1
Cmc1	0.488257	3.4256	0.502942	0.47821	1
Pdlim5	0.370517	5.17333	0.906508	0.341043	1
Ppp6r2	-0.500885	3.76832	0.72722	0.393786	1
H2.T23	-0.200131	8.97146	0.251094	0.616306	1
Naa35	-0.803451	4.68064	2.82234	0.0929608	1
Abcb9	-0.68375	1.87304	0.32868	0.566437	1
Tyw5	0.918666	2.70084	1.11924	0.290083	1
Rdh12	0.200463	3.84146	0.0570487	0.811223	1
Notch1	-0.392504	2.63965	0.222502	0.63714	1
BC003965	0.326117	3.66036	0.375978	0.539764	1
Serpinb10	0.124507	5.85693	0.0248453	0.874753	1
Mettl15	0.0569567	2.59162	0.00543063	0.941255	1
Nudt17	0.364559	1.32714	0.0901874	0.763939	1
Med24	0.286806	4.41067	0.240376	0.623935	1
Mettl18	0.189308	2.64764	0.0504598	0.822265	1
Tpx2	0.408404	5.27488	0.703109	0.401741	1
Mgat4a	0.41569	5.13703	0.940734	0.332089	1
E130307A14Rik	-0.992769	2.689	0.976108	0.323162	1
Sfmbt2	-1.44605	1.39306	1.51729	0.218029	1
Phospho2	0.271679	4.83832	0.367316	0.544471	1
Orai2	-0.424048	5.81746	1.23445	0.266543	1
Grap	-0.41155	6.5861	1.01762	0.313084	1
Fam104a	-0.26023	4.43843	0.164757	0.684814	1
Brat1	-0.622389	3.71822	1.44036	0.230081	1
Gm15706	-2.42178	1.38485	5.99003	0.014387	1
Rnpc3	-0.156142	4.26551	0.0383572	0.844728	1
Polq	-0.833289	2.16675	0.446567	0.50397	1
Calcrl	0.690946	4.87417	1.05047	0.305399	1
Pygm	-0.433125	1.89687	0.161219	0.688037	1
Bet1l	-0.24479	4.60683	0.355283	0.551137	1
Neu1	-0.27715	5.12497	0.394801	0.529786	1
Atpif1	0.361354	8.91411	0.298855	0.584601	1
Reep4	0.332079	3.4189	0.291539	0.589236	1
Colgalt1	0.143396	5.90191	0.12103	0.72792	1
Gemin8	1.64353	1.10222	1.12623	0.288582	1
Ddx19a	1.15138	1.45648	0.784625	0.37573	1
Tmem176a	0.455228	2.56486	0.188529	0.664144	1
Gna11	-0.543879	3.26951	0.738259	0.390219	1
Snapc5	-0.0804405	4.61523	0.0355934	0.850358	1
Dek	0.438818	7.07359	1.70244	0.191969	1
Grk5	-0.106696	4.79992	0.0528158	0.818234	1
Ms4a4b	0.269252	8.04598	0.322999	0.569811	1
Chordc1	0.242924	6.12075	0.258424	0.611205	1
Hdac4	-1.35796	4.10498	6.05439	0.0138718	1
Rec114	0.2351	9.35962	0.0471347	0.828126	1
Tmem159	2.03255	2.05614	3.49164	0.0616794	1
Slc4a1	0.914991	11.2765	0.507095	0.476399	1
Plk2	1.02734	2.99547	1.51966	0.21767	1
Gm28151	1.37657	1.90055	2.09514	0.147768	1
Sfr1	-0.0162017	5.10317	0.00157524	0.968341	1
Smyd4	-0.126187	3.35306	0.0254854	0.873163	1
Itih2	3.61899	2.67117	1.33461	0.247987	1
Rnf38	-0.547298	5.27426	1.09323	0.295757	1
Trappc6b	0.318743	5.00803	0.55728	0.455358	1
Iqgap1	-0.128583	7.37435	0.187902	0.664668	1
Gm1821	0.0897938	4.26896	0.016628	0.897398	1
Nudt9	0.654846	4.58398	1.7505	0.185815	1
Pnpla2	0.226354	4.42345	0.18206	0.669608	1
Ctss	-0.0359114	9.8709	0.0078854	0.929241	1
Exosc8	0.203534	5.1536	0.179269	0.672002	1
Ighv1.9	-2.2408	2.1431	3.5009	0.0613354	1
Sall2	-0.565166	0.934201	0.150076	0.698463	1
Lactb	-0.0295708	4.67485	0.00405562	0.949222	1
Mob3a	-0.730388	7.12029	3.99063	0.0457539	1
Kdm4b	0.443189	2.59093	0.247456	0.618872	1
Fahd2a	0.626239	2.63149	0.826143	0.36339	1
Sh3gl1	-0.534335	4.85306	0.945266	0.330927	1
Cr1l	0.0205061	6.62083	0.00528438	0.94205	1
Timd4	2.15298	4.60834	1.54865	0.213335	1
Srpk2	-0.246006	5.0676	0.427141	0.513395	1
Klf11	0.3119	2.62819	0.136333	0.711954	1
2009-03-01	-1.58616	1.23874	1.07989	0.298721	1
Ank1	1.09445	5.66937	0.696764	0.403873	1
Rnf11	0.210666	10.3418	0.0612092	0.804595	1
Nup35	-0.503544	3.8984	0.62508	0.429166	1
Gm14403	2.75794	1.05781	1.87995	0.170339	1
Gata1	0.0142489	4.98965	0.000342808	0.985228	1
Pggt1b	0.525651	3.02412	0.447725	0.503417	1
Il10ra	-0.391914	6.98567	1.10655	0.292833	1
Ltbp1	-0.853722	5.75545	1.6314	0.201509	1
Glod4	0.15257	5.30442	0.140715	0.707571	1
Zmym1	0.365116	3.81293	0.503962	0.477764	1
Ubxn11	0.0725113	2.20087	0.00645433	0.935968	1
2010111I01Rik	-0.57625	4.78562	1.39945	0.236816	1
Mat2a	-0.166159	6.39638	0.207343	0.648858	1
Becn1	0.268296	10.1783	0.152771	0.695902	1
Pex3	0.847029	3.41832	1.34288	0.246527	1
Rpusd4	0.0381036	3.91805	0.0048483	0.944488	1
Wars2	0.0758799	3.36578	0.0132478	0.908367	1
Gm28053	-0.095321	1.14212	0.00362764	0.951973	1
mt.Cytb	0.334873	9.73913	0.280789	0.596185	1
Fkbp8	0.106922	7.59497	0.0465234	0.829227	1
Zfp592	-0.522612	4.63132	1.49895	0.220833	1
Ncor1	0.253922	6.4714	0.528697	0.467155	1
Efhd2	-0.605516	4.89623	1.36553	0.242582	1
Dnmbp	-1.39726	1.57798	2.04668	0.152538	1
Zfp275	0.0200187	3.58438	0.00137006	0.970474	1
Dnajc16	0.0705793	2.45606	0.00844217	0.926792	1
Srrm2	0.200098	4.14968	0.1404	0.707884	1
Gimap1	-0.0717143	5.79834	0.0442474	0.833394	1
Rps11	-0.06436	9.91918	0.0333257	0.855148	1
Gtf2h1	-0.139561	5.37597	0.148167	0.700293	1
Acss1	0.403947	5.85151	1.02578	0.311152	1
Aasdhppt	0.824966	4.12777	3.88139	0.0488242	1
Ncr1	-0.351373	5.45303	0.122719	0.726104	1
Golim4	-0.482255	3.03041	0.479023	0.488865	1
Tnfrsf21	0.0166687	4.02855	0.00129613	0.971281	1
Adamts14	-1.6975	3.35627	3.37373	0.0662435	1
Ubac1	0.66622	8.30866	0.775762	0.37844	1
Taf9b	-0.163409	3.6025	0.0811289	0.775773	1
Cdipt	-0.304564	5.31696	0.55643	0.455702	1
Zfp593	-0.0708653	2.63835	0.00969741	0.921555	1
Hnf4a	2.72402	2.26573	1.16681	0.280058	1
H2.Q4	-0.191718	7.85086	0.290451	0.589932	1
Calu	-0.146489	6.49037	0.198101	0.656258	1
po6	0.744188	2.66053	1.02821	0.31058	1
Slc25a33	-0.946042	2.29937	0.722119	0.39545	1
Gtpbp8	0.320913	3.48993	0.292217	0.588803	1
Phf12	-0.141133	3.19036	0.0571212	0.811105	1
AI314180	-0.102862	5.91737	0.0932965	0.760027	1
Ddias	2.34281	1.33493	2.41852	0.119909	1
Chtf8	-0.279173	6.4684	0.470308	0.492846	1
Pom121	-0.152186	2.61675	0.0521146	0.819424	1
Mapre2	-0.0218804	5.79343	0.00179347	0.96622	1
Trbv13.2	-0.163148	3.28441	0.0553345	0.814028	1
Kbtbd7	0.742893	3.54588	1.07621	0.299547	1
Commd8	0.4067	5.70563	1.2262	0.268147	1
Gcnt2	-0.364126	5.69386	0.419106	0.517383	1
Mrps26	0.0898789	4.27987	0.0174001	0.895056	1
Dhx35	-1.33519	2.85315	1.91875	0.165995	1
Zadh2	0.0898953	2.54276	0.0105477	0.9182	1
Gm3604	1.33367	1.08702	1.02379	0.311621	1
Klf13	-0.814054	5.54457	3.65359	0.0559485	1
Plcd3	1.34387	0.467733	0.697637	0.403579	1
Tank	0.581478	6.14048	2.09988	0.147311	1
Cotl1	-0.257309	7.29852	0.347153	0.555729	1
Iqce	1.39036	2.53724	2.92371	0.0872868	1
Gm47992	-0.788379	1.47248	0.50661	0.47661	1
Ldlrap1	-0.406697	4.41617	0.872916	0.350149	1
6330418K02Rik	-0.308292	1.75859	0.0934257	0.759866	1
Mkks	-0.888114	2.37365	0.859642	0.353839	1
H2.Q10	-0.823478	6.27793	0.83407	0.361098	1
Smu1	-0.273586	6.86068	0.725502	0.394345	1
Mycbp2	-0.0424791	6.05491	0.0128941	0.909593	1
Usp15	0.390317	10.604	0.25996	0.610148	1
Cul4a	0.734191	8.28533	0.85826	0.354226	1
Ccdc88b	-0.589065	5.3484	1.05849	0.303559	1
Ttc9c	0.214526	5.25826	0.286707	0.592339	1
Gbp11	-0.0556325	2.82665	0.00231962	0.961587	1
Pwp2	-0.164618	4.21262	0.114952	0.734576	1
Alpk1	0.374882	3.11142	0.360575	0.548187	1
Cdk16	0.291962	4.19224	0.385037	0.53492	1
Smad3	0.108864	3.80569	0.040252	0.840989	1
Rgs10	-1.16915	8.08121	3.5709	0.0588003	1
Slc9a9	0.326831	3.74587	0.209823	0.646906	1
Aamp	-0.62801	5.58052	2.82372	0.0928812	1
Ypel5	0.335584	8.83376	0.246774	0.619356	1
Tspan2	-1.12315	5.51542	1.69869	0.192459	1
Slc15a4	-0.0940235	5.31012	0.0740823	0.785483	1
Etv3	0.192533	4.75976	0.260548	0.609744	1
Crtam	0.44674	2.99992	0.305198	0.580642	1
Atf6	0.0171739	5.71758	0.00165934	0.967507	1
Tmem29	0.071255	5.35817	0.0147089	0.903469	1
Rpl14.ps1	0.371442	2.75479	0.42008	0.516897	1
Ndufv2	0.695695	6.33055	3.94188	0.047098	1
Psmc5	0.552901	6.01814	1.77172	0.18317	1
Fbxo30	0.5766	6.28269	0.464647	0.49546	1
Atp2a2	-0.263154	3.71961	0.164733	0.684836	1
Ccdc88c	-0.0137582	5.70448	0.00123453	0.971971	1
Maml3	-2.55249	1.24323	5.33031	0.0209577	1
Zfp790	0.0217637	3.42777	0.00111511	0.973361	1
Tpt1.ps5	-0.837253	2.54886	0.699709	0.402882	1
Sec61a1	-0.375686	6.51589	0.886469	0.346436	1
Ufc1	-0.151323	6.19218	0.157964	0.691038	1
Hspa1a	-0.837665	0.95339	0.337474	0.561291	1
Aak1	-0.408176	5.44551	1.15192	0.283148	1
C530008M17Rik	-1.16951	3.59132	1.43016	0.231739	1
Prom1	2.969	0.540153	2.32478	0.127328	1
Glrx2	0.839313	4.99572	1.59727	0.206291	1
Armcx1	-4.22016	1.64699	10.6424	0.00110526	1
Lacc1	-0.0678442	0.969364	0.00252134	0.959953	1
Sash3	-0.223701	7.60013	0.486049	0.485695	1
Ckap5	0.602451	5.28229	1.63747	0.200672	1
Zfp101	0.189743	4.08977	0.117946	0.731273	1
Tmem268	-0.325376	4.87817	0.550722	0.458023	1
Gatd1	-0.467489	3.06271	0.391825	0.531342	1
Tmem208	-0.34579	4.56793	0.488183	0.484739	1
2700038G22Rik	0.32754	1.48337	0.062505	0.80258	1
Ddr1	-1.9153	0.852654	2.19602	0.138368	1
Ptprj	-0.717949	6.80515	3.11024	0.0778014	1
2810002D19Rik	-0.659929	2.00545	0.546757	0.459646	1
Rilpl2	0.725312	5.12036	0.991488	0.319379	1
Snhg17	0.469719	3.09094	0.443341	0.505514	1
Retreg3	0.338618	7.07411	0.840269	0.35932	1
2003-03-01	0.272871	6.92887	0.0616914	0.803842	1
Slc2a3	-1.27292	7.60315	4.12408	0.042277	1
Mospd2	1.04617	4.39683	2.96406	0.0851341	1
Zfp961	-0.0239335	3.99464	0.00214876	0.963028	1
Ippk	-0.136786	3.05012	0.023841	0.87729	1
Ccpg1os	0.0443126	1.95572	0.00211662	0.963305	1
Zfp207	0.190843	7.19298	0.356128	0.550665	1
Prkci	0.915162	3.00007	1.42312	0.23289	1
Gm5960	-0.168722	3.10995	0.0113055	0.915323	1
Zfp933	1.04491	2.79849	1.42096	0.233246	1
Emc10	-0.401939	2.39523	0.320198	0.571489	1
Ctsw	-0.443025	5.32	0.648703	0.420577	1
Ercc3	0.0110441	4.52503	0.000671278	0.97933	1
Cep83	0.698018	4.70231	1.77231	0.183096	1
Vps41	0.247984	5.85738	0.639703	0.423818	1
Mbnl2	-0.12441	6.55324	0.0715588	0.789081	1
Rpl38.ps2	-0.333358	5.64656	0.369748	0.543142	1
Pikfyve	0.163488	5.08737	0.13006	0.71837	1
krx	0.57689	2.01878	0.327737	0.566995	1
Rnh1	-0.113828	7.06531	0.0666956	0.79621	1
Rer1	-0.0122707	6.78972	0.00143367	0.969796	1
Zfp809	-0.12038	3.89305	0.0280541	0.866982	1
Arntl	1.03082	3.7561	3.52508	0.0604469	1
Wipf1	-0.132714	6.67069	0.115605	0.733851	1
Fkbp2	-0.00718006	3.31251	8.50151e-05	0.992643	1
Gpr83	0.962877	1.76008	0.885107	0.346807	1
Mir142hg	-0.227679	4.32965	0.117697	0.731546	1
Peli2	0.281667	0.936598	0.0364392	0.848611	1
Nrf1	0.322665	5.1614	0.634174	0.425828	1
Ube2t	-0.475851	2.00656	0.275752	0.599499	1
Med4	0.162115	4.38255	0.144026	0.704311	1
Tmem63b	-0.164749	2.34514	0.0332454	0.855321	1
Osm	0.261137	2.93648	0.0738235	0.785849	1
Usp42	-0.0832504	3.24188	0.0152743	0.901641	1
Ido1	1.14742	0.323771	0.357502	0.549897	1
Dnmt3a	-0.168009	4.36237	0.118316	0.730868	1
Supt16	-0.262589	6.48171	0.534334	0.464791	1
Usp24	0.227106	5.29137	0.390168	0.532211	1
Txn1	0.387494	7.46477	0.952115	0.329181	1
Uap1l1	-0.414288	3.77707	0.588254	0.443095	1
4930599N23Rik	0.987206	1.43951	0.396498	0.528903	1
D230025D16Rik	0.25945	3.97165	0.239873	0.624298	1
Sgms1	0.135054	5.53839	0.0905385	0.763494	1
Retreg1	-0.164385	5.65241	0.184633	0.667421	1
Socs2	2.66401	1.88582	4.31203	0.0378438	1
Gm9958	0.0709094	1.46856	0.00508293	0.943163	1
Pus10	0.700477	4.17575	1.48569	0.222886	1
Riok1	0.236737	5.19636	0.273085	0.60127	1
Nfia	3.23394	1.0407	4.78144	0.028768	1
Slc38a5	0.80336	5.10191	0.519562	0.471028	1
Klf10	-0.0938238	4.29997	0.043535	0.834721	1
Dcun1d3	-0.298844	2.80204	0.234475	0.628225	1
Ints6	0.051644	4.75255	0.0173627	0.895168	1
Nme7	-0.335909	3.33464	0.207949	0.648379	1
Inppl1	0.197331	2.55591	0.0458147	0.830513	1
Fam219b	-0.252153	3.22541	0.110335	0.739763	1
Vgll4	0.0420381	3.79132	0.00825478	0.927607	1
Zswim4	0.0246779	2.81561	0.00094973	0.975415	1
Kctd18	0.26476	3.81695	0.193448	0.660063	1
Ptch1	-0.0253012	2.84952	0.00109712	0.973577	1
Git2	-0.832019	3.3173	2.48989	0.11458	1
Banf1	-0.522946	4.50177	1.17126	0.279143	1
Rnf213	-0.381106	8.12511	0.5492	0.458645	1
2500004C02Rik	0.600697	2.65269	0.446802	0.503857	1
Themis	0.171167	5.40985	0.0992562	0.752724	1
Tubb6	0.543813	4.28882	0.801781	0.370561	1
Cenps	0.143974	1.94231	0.0244802	0.875669	1
Mmp25	-1.02015	1.38208	0.377274	0.539066	1
Ankrd40	-0.235472	4.69623	0.303348	0.581791	1
Nudt21	0.376677	5.58262	0.883284	0.347304	1
Znf41.ps	-1.00377	2.51656	1.01269	0.31426	1
Ccl8	3.68961	0.613302	5.52941	0.0186994	1
Sumo1	0.373681	7.17346	1.33233	0.248392	1
Loxl3	0.840935	1.40709	0.731926	0.39226	1
Rfc1	-0.201283	5.49217	0.251143	0.616271	1
Vta1	0.382176	5.3294	1.18152	0.277047	1
Gm37305	-1.10715	2.74235	2.22549	0.135749	1
Taco1	-0.339004	2.68678	0.220585	0.638594	1
Lipg	-1.09921	2.91337	0.388793	0.532934	1
Phactr2	0.755563	2.60275	0.846287	0.357605	1
Dynll2	-0.267634	2.56091	0.103399	0.747788	1
Smim13	-0.236931	3.28735	0.116451	0.732916	1
Gm15050	-1.10794	2.29764	0.511648	0.474426	1
F7	0.571648	2.62122	0.152725	0.695944	1
Trip10	0.855476	1.99009	1.02802	0.310625	1
Ppp3cc	0.0786952	5.82649	0.0445748	0.832788	1
Qpct	-1.19639	2.57856	1.60898	0.204635	1
Paf1	-0.211953	5.24878	0.303113	0.581937	1
Fbxw4	-0.580797	3.55412	1.12223	0.289438	1
Plod1	-0.212645	3.68448	0.097046	0.755404	1
Mast4	0.968466	1.55796	0.522347	0.469842	1
Btrc	-0.918347	1.83044	0.82876	0.362631	1
Tmem170	0.847355	2.11819	0.574317	0.448549	1
Dcaf13	0.25758	4.88358	0.35258	0.552656	1
Zc3h12a	-0.75822	1.1253	0.326212	0.567898	1
Igkv10.96	0.990088	1.76172	0.713368	0.398328	1
Zfp511	0.0577942	3.58074	0.0109121	0.916803	1
Col4a3bp	0.0856419	5.47131	0.0541475	0.815997	1
Cd302	0.443278	4.70743	0.22514	0.635151	1
Slc24a3	-0.879674	2.9307	1.02842	0.310531	1
Prrc1	-0.469962	2.47068	0.315547	0.574296	1
Tbcel	0.814366	5.78092	1.16089	0.28128	1
Ptgs1	-0.688048	6.02999	1.33109	0.248612	1
Cenpa	0.170689	4.77166	0.100605	0.751104	1
Mtcp1	1.10242	1.90835	1.33345	0.248193	1
Cenpf	1.02242	3.48271	1.21595	0.270157	1
Abhd11	0.107423	3.97604	0.0371419	0.847177	1
Tardbp	-0.210245	6.90514	0.368662	0.543734	1
Trappc10	0.190389	4.68804	0.202745	0.652514	1
Cox18	1.66556	2.50762	3.35191	0.067127	1
Rhoh	-0.0272771	6.45879	0.00430781	0.947669	1
Gem	-0.203277	3.88514	0.0809329	0.776037	1
Eps8	-0.705187	2.33571	0.537282	0.463561	1
Ilf3	0.0666998	4.47452	0.0187159	0.891184	1
Klc1	-0.131836	5.08336	0.0877494	0.767058	1
Fcgr2b	0.18862	6.26568	0.156277	0.692608	1
5830468F06Rik	0.222863	2.33216	0.0335047	0.854764	1
Magohb	-0.117583	3.5456	0.0230783	0.879254	1
Slc16a6	0.677349	5.49029	1.49183	0.221933	1
Rasal1	-2.57426	1.30539	5.86423	0.0154516	1
Heatr1	-0.366256	5.04703	0.613187	0.43359	1
Il1f9	-0.665998	6.10028	0.844142	0.358215	1
Ppp1r7	-0.178299	4.82645	0.208559	0.647899	1
Rin3	-0.134899	5.03513	0.112855	0.736917	1
Ccnf	0.352133	2.25415	0.0812431	0.77562	1
Chil1	0.670778	5.564	0.701001	0.402448	1
Spo11	-0.320348	2.51898	0.0526639	0.818491	1
Ulk3	-0.456994	1.44911	0.141651	0.706646	1
Slc30a9	0.334496	7.16044	0.298551	0.584792	1
Nubp1	-0.671971	5.56777	2.87564	0.0899293	1
Asf1a	0.217616	4.55062	0.158081	0.690929	1
Mbtps1	-0.211591	5.71558	0.369069	0.543512	1
Tubd1	-0.165602	2.46516	0.0252848	0.873659	1
Dkc1	0.576768	6.35497	2.72386	0.0988587	1
Dhrs1	-0.166144	5.03027	0.127576	0.720959	1
Ttc39b	0.0783279	5.18538	0.034516	0.852614	1
Mtch2	0.136224	6.1892	0.136019	0.712272	1
Irf2	0.893729	2.17239	0.741401	0.389212	1
Ednrb	2.0181	4.76321	1.83956	0.175003	1
Zfp975	0.0342769	1.25282	0.00052077	0.981794	1
Rab21	0.374795	5.79102	0.837913	0.359994	1
Atxn7l1	-0.0315215	3.84087	0.00163823	0.967714	1
Hexdc	0.527021	1.88549	0.301065	0.583216	1
Lypla2	-0.449427	4.95563	0.806747	0.369084	1
Eif2d	0.198008	4.78699	0.180279	0.671134	1
Mars	-0.285907	5.03198	0.430514	0.511737	1
Slc29a1	0.559222	4.00942	0.640318	0.423596	1
Tet3	-0.343984	4.26044	0.377392	0.539002	1
Hdac9	0.921275	3.62588	1.48834	0.222475	1
Cpm	0.539044	4.38312	1.08185	0.298283	1
Brca1	1.86445	2.97841	2.72857	0.0985677	1
po4	0.00254201	4.25825	3.37947e-05	0.995362	1
Ighv1.76	-0.145093	0.989715	0.0182728	0.892472	1
Lamc1	1.01817	2.80999	2.87258	0.0901003	1
Rfc2	-0.181472	5.85388	0.20937	0.647261	1
Ptcd2	0.0310101	5.39814	0.00705105	0.93308	1
1700011B04Rik	-1.58715	0.665945	1.05568	0.304202	1
Shq1	-0.604359	2.46245	0.331897	0.564544	1
Tubb1	-1.64326	8.45764	3.08713	0.078914	1
Suds3	0.134361	7.88377	0.0547805	0.814944	1
Zfp773	0.387854	2.74708	0.380187	0.537503	1
Prokr1	-0.434583	3.47845	0.192217	0.661078	1
Hyal2	0.15865	1.35188	0.0164642	0.897901	1
Cd101	-1.17657	4.13924	2.66096	0.102839	1
Myzap	1.18966	0.995088	0.452563	0.50112	1
Zdhhc13	0.106264	4.52843	0.037073	0.847316	1
Fbxo46	0.139026	1.7054	0.0266134	0.870411	1
Rrp1	-0.224074	6.15684	0.262328	0.608525	1
Gm4070	1.27203	6.51836	3.2304	0.0722831	1
Gm31597	-1.09417	1.37116	0.565225	0.452163	1
Lgmn	0.205577	6.315	0.114272	0.735332	1
Kdm2b	0.11971	3.21646	0.0458188	0.830505	1
Acp2	-0.318435	5.09552	0.393754	0.530333	1
Trp53inp2	2.57444	2.25865	4.76676	0.0290143	1
Tinf2	-0.0207085	5.05834	0.00119834	0.972385	1
Pop1	-1.06905	2.71957	2.00578	0.156701	1
Tfam	-0.20055	5.59394	0.23294	0.629353	1
Heatr3	-0.0578267	4.25368	0.01645	0.897945	1
Mettl27	0.674744	4.80603	0.752739	0.38561	1
Dcaf7	0.0772565	6.03965	0.065081	0.798638	1
Snx29	-0.218681	1.95288	0.0845734	0.771193	1
Atrn	0.25034	4.09238	0.239533	0.624544	1
Tbc1d9b	0.0147479	3.2928	0.000517034	0.981859	1
Sfi1	-0.393072	3.98455	0.506811	0.476523	1
Ezh1	-0.217081	5.5258	0.33706	0.561531	1
Ube2e1	0.823411	4.47398	3.00326	0.0830973	1
Pomgnt1	0.02602	3.70121	0.00174125	0.966715	1
Rnf41	-0.585906	3.9178	0.954202	0.328652	1
Sri	-0.0363714	7.06001	0.0141074	0.905454	1
Cdca2	-0.0195876	3.16646	0.000431979	0.983418	1
Mybl2	-0.161194	1.08092	0.0127075	0.910246	1
Orc4	-0.224842	5.57596	0.291716	0.589123	1
Susd1	-0.109298	5.06598	0.0516151	0.820276	1
C1qb	0.747497	4.91273	0.355433	0.551054	1
Imp4	-0.162065	5.2598	0.191409	0.661746	1
Ubr3	0.322157	5.57748	0.443648	0.505367	1
C920009B18Rik	-0.639156	3.23787	0.69466	0.404584	1
Mrpl47	0.0903676	3.73774	0.0274384	0.868436	1
U2af1	-0.217135	5.23828	0.172203	0.678161	1
mt.Nd2	0.563958	6.52748	0.746568	0.387565	1
Il6ra	-0.42283	5.67115	1.25043	0.26347	1
Map2k2	0.0166784	7.08236	0.000613965	0.980232	1
Ep400	-0.130576	5.15318	0.10813	0.742284	1
4932438A13Rik	0.00617652	4.63157	0.000117352	0.991357	1
Fam49a	0.128513	6.71463	0.0917768	0.76193	1
Mlf2	-0.477473	5.42979	1.47797	0.224092	1
Apool	0.115399	4.19286	0.0559034	0.813092	1
Mrpl41	0.407626	4.1139	0.706103	0.40074	1
H2.K1	-0.244244	11.2775	0.297004	0.585767	1
Ubtd1	-0.521182	3.01952	0.691256	0.405738	1
Mocos	-0.261162	3.96632	0.11752	0.73174	1
Dennd4c	0.28792	4.55216	0.272745	0.601496	1
Mettl5	0.238421	2.04752	0.0869579	0.768081	1
Nub1	-0.0418841	5.89359	0.0188601	0.890768	1
Zfp97	0.376633	3.03456	0.168168	0.681745	1
Pdhx	-0.105644	2.91762	0.0203133	0.886666	1
Mier1	0.278701	6.18376	0.543838	0.460847	1
Rapgef1	0.265732	4.4973	0.246528	0.61953	1
Tmem14c	-0.167613	6.13767	0.163503	0.685952	1
Zbtb34	0.708941	1.29642	0.353701	0.552026	1
Siah2	-1.05222	3.41818	1.78223	0.181876	1
Frs2	0.144294	2.78681	0.0352653	0.851041	1
Zfp992	-0.292797	2.21002	0.099315	0.752653	1
Cptp	-0.278509	2.94613	0.122528	0.726309	1
Slc9a6	-0.566145	3.86552	0.901859	0.342284	1
Apoo	-0.973284	2.49931	0.671017	0.412697	1
Slc9a8	0.518717	4.94419	1.39439	0.237666	1
Fggy	1.41515	1.82698	0.894745	0.344195	1
Arhgap18	-1.08947	6.5344	2.74463	0.0975814	1
F8a	-0.063261	2.35661	0.0083854	0.927038	1
Pcp4l1	-0.713857	2.505	0.408602	0.52268	1
Ddx24	-0.179834	6.50229	0.257596	0.611777	1
Dock10	0.101497	7.20061	0.0777906	0.780314	1
Slc4a8	-1.79195	1.85306	3.38082	0.0659594	1
Yipf4	0.362009	8.91537	0.172475	0.677922	1
Washc4	0.733666	5.6154	4.15021	0.0416294	1
Ly96	1.16733	2.81491	1.90966	0.167002	1
Gadd45g	-0.818687	2.52424	0.914053	0.339041	1
Strn4	-0.709361	4.01961	2.11918	0.145464	1
Actb	-0.279562	11.1232	0.520902	0.470457	1
Uspl1	0.100836	5.41887	0.0402567	0.84098	1
Reep5	0.114036	4.90754	0.0634545	0.801117	1
Selenoi	1.00078	3.41352	2.13842	0.14365	1
Lin54	0.31181	3.30208	0.20148	0.653529	1
1700097N02Rik	0.714031	1.88446	0.378677	0.538312	1
Cnrip1	2.00093	1.27905	1.38021	0.240066	1
Zbtb25	0.352056	3.45104	0.489614	0.4841	1
Zscan26	-0.263842	4.91617	0.359556	0.548753	1
Tmem250.ps	0.140053	3.66157	0.0641388	0.80007	1
Pkib	-0.109157	4.21156	0.0252654	0.873707	1
Uqcrfs1	0.254252	6.35867	0.687266	0.407096	1
Ncln	-0.529816	2.05048	0.541971	0.461617	1
Lrp6	0.0465344	3.87683	0.00895692	0.9246	1
Tinagl1	1.08473	3.56356	1.19576	0.274171	1
Gmpr2	-0.270671	4.06509	0.203372	0.652013	1
D030028A08Rik	-0.614516	1.64239	0.392211	0.531139	1
Mmp19	-1.36689	5.0638	3.40028	0.0651852	1
Elavl1	0.0166033	5.06043	0.00211404	0.963327	1
Nxt2	1.15532	2.81215	1.89166	0.169014	1
Piga	0.921202	3.62332	1.85079	0.173691	1
Nprl3	-0.257685	5.02108	0.313704	0.575416	1
Cxcr3	0.05544	4.74208	0.00400959	0.949511	1
Ptk2b	-0.262934	5.57414	0.434219	0.509926	1
Nfkb2	-0.138965	4.78163	0.0841073	0.771807	1
Cox6b2	1.79718	6.06813	1.56788	0.210515	1
Azi2	0.15687	6.33258	0.286392	0.592542	1
Suclg1	-0.086072	5.53593	0.0522081	0.819265	1
Ccl25	-0.664126	1.9397	0.619326	0.431298	1
Gm42715	1.45061	1.15605	0.927388	0.335543	1
Ifi47	-0.228462	8.65465	0.231397	0.63049	1
Plcxd2	0.512458	3.25495	0.247036	0.61917	1
Scp2	0.0579734	7.33542	0.0305186	0.861319	1
Mcam	0.487251	2.81222	0.208494	0.64795	1
Smarce1	0.314804	6.29858	1.05524	0.304303	1
Htatip2	0.800037	6.32796	1.59946	0.20598	1
Fam168b	-0.000671982	6.70566	3.68978e-06	0.998467	1
Cd22	-0.286311	7.13074	0.609857	0.434842	1
Srm	0.582396	3.10467	0.474863	0.490758	1
Ube2j2	-0.187655	5.51006	0.325635	0.568241	1
Tube1	-2.22683	1.94074	2.32063	0.127668	1
1500009L16Rik	0.232238	2.09057	0.0237772	0.877453	1
Tnks1bp1	-0.328592	2.07188	0.149199	0.699302	1
Dlgap4	-0.443026	4.07099	0.694465	0.40465	1
BC003331	0.024337	4.76122	0.00326672	0.954422	1
Krtcap3	0.00604495	1.60972	3.3292e-05	0.995396	1
Treml1	-1.51177	5.88254	3.57205	0.0587596	1
B4galt7	-0.523112	4.09351	1.3816	0.239828	1
Zfp36l1	-0.0626794	6.07265	0.0128085	0.909892	1
Zfp473	1.72435	0.760905	0.948154	0.33019	1
Aimp2	-0.0386126	3.62314	0.00386419	0.950433	1
Itgb1	-0.100726	8.93621	0.0632359	0.801453	1
Ing5	0.898443	3.74026	2.13605	0.143872	1
Thoc7	0.591115	5.4308	2.12006	0.145381	1
Rpf2	0.17682	4.37484	0.0982635	0.753923	1
Mapkapk2	-0.447432	7.63828	1.33177	0.248491	1
Esco1	0.208446	5.48909	0.240028	0.624186	1
Slc24a5	-4.737	1.27372	9.61285	0.0019322	1
Col1a2	2.80524	0.782463	1.51942	0.217707	1
Oat	0.0218124	6.13722	0.00454141	0.946271	1
Atp5a1	-0.115424	9.26052	0.122139	0.726726	1
Actl6a	-0.0739926	5.64223	0.0264854	0.87072	1
Rpl23a	0.250599	10.2908	0.40443	0.52481	1
Smim4	0.938573	5.07827	1.44684	0.229036	1
Gtf3c5	-0.0726469	3.09679	0.01227	0.911799	1
Tcf7	0.0170254	5.74055	0.000512326	0.981942	1
Lrpprc	0.556336	5.3771	2.00676	0.156599	1
Eloa	1.15324	6.75653	4.32969	0.0374531	1
Cd81	-0.708842	6.19063	2.44679	0.117765	1
2410015M20Rik	0.557582	6.05746	1.2629	0.261102	1
Tgds	-0.0319841	3.39811	0.00317985	0.955031	1
Tmem222	0.0505363	4.39122	0.0118648	0.913261	1
Stoml1	0.0519433	4.58693	0.010597	0.918009	1
Clnk	-1.10693	1.21054	0.513143	0.473782	1
Gapvd1	0.720242	7.12148	2.25117	0.133513	1
Bbs7	1.10242	1.75216	0.835781	0.360606	1
A630023P12Rik	0.477374	3.11751	0.412172	0.520869	1
B430306N03Rik	0.324346	4.38772	0.294204	0.587539	1
Rasgrp3	-0.100915	4.62102	0.0253224	0.873566	1
Pop5	0.101369	4.74819	0.0567944	0.811636	1
Trmt6	0.619436	4.39596	1.31277	0.251894	1
Slc7a6os	0.534408	3.74393	0.749528	0.386626	1
Med28	0.628282	6.12931	2.8267	0.0927086	1
Nedd4	0.13942	5.41482	0.0814522	0.775339	1
4930503L19Rik	1.39167	3.10857	3.39331	0.0654614	1
Nipsnap2	-0.538127	5.00431	1.23932	0.265603	1
Pgam1	1.44552	2.29162	2.12955	0.144483	1
Ing2	0.455824	4.65224	0.510707	0.474833	1
Sparc	4.40397	2.37799	3.39342	0.0654569	1
Kcnj2	-0.520232	3.52213	0.460479	0.4974	1
4930438A08Rik	0.333772	0.500292	0.0394741	0.842512	1
B3galt4	0.12945	2.44643	0.025256	0.873731	1
Cops9	0.0109365	5.10133	0.00099003	0.974899	1
Pigu	0.354374	3.8226	0.334801	0.562846	1
Bcas3os1	-0.496949	1.90515	0.150952	0.697627	1
Mfsd4b4	1.87672	1.5818	2.23198	0.13518	1
Mrpl38	0.0309338	3.66959	0.00247888	0.960291	1
Khdc1c	-0.970337	1.03537	0.358736	0.549209	1
Epc2	0.315504	4.97735	0.462895	0.496274	1
S1pr5	-0.251642	4.76534	0.228263	0.632815	1
Plau	-0.371812	1.2408	0.0635767	0.80093	1
Smco4	0.82705	1.56895	0.629564	0.427515	1
Abhd4	-0.344978	6.65324	0.347224	0.555689	1
Serpinb2	2.02272	6.0131	2.35448	0.124923	1
Fcer2a	-0.322509	5.42788	0.200538	0.654287	1
Gm7160	1.11017	1.97246	1.38669	0.238965	1
Cldn15	1.48537	2.86509	1.18746	0.275842	1
Larp1b	0.177253	5.15909	0.130837	0.717566	1
Ndufa1	1.01802	7.92543	2.15326	0.142268	1
Atp5s	0.541951	2.38785	0.374701	0.540453	1
Thoc6	-0.0363627	3.83796	0.00400448	0.949543	1
Aes	-0.858053	4.50155	2.54702	0.110502	1
Tada3	-0.488266	2.08856	0.234641	0.628104	1
Cd226	-0.374151	6.26203	0.253255	0.614792	1
AU019823	0.537159	3.54146	0.683446	0.408403	1
Acsl1	0.715845	8.35552	0.50728	0.476319	1
Gpr137	-0.323586	2.92223	0.274826	0.600113	1
Cul1	0.0100139	6.52142	0.00101411	0.974596	1
Ggt1	-0.934992	3.33401	0.925772	0.335964	1
Klhdc2	0.0192419	5.28191	0.00262332	0.959152	1
Gm42418	1.64353	2.78482	2.28068	0.130995	1
Btf3	0.136768	8.49865	0.176473	0.674422	1
Ly6e	-0.299765	9.78577	0.572264	0.449361	1
Prkab1	-0.334315	4.88168	0.739307	0.389883	1
Phb	0.00731805	5.62551	0.000451305	0.983051	1
Rabepk	-0.40749	3.89333	0.433862	0.5101	1
Ctsc	0.281907	8.18499	0.580583	0.446084	1
Fam160b2	-0.527695	1.29178	0.204141	0.651399	1
Gnas	-0.339254	11.9685	0.206717	0.649353	1
Mon1a	-0.760597	3.48816	1.59154	0.207106	1
Rheb	0.067512	5.18953	0.0335299	0.85471	1
Cfd	3.96013	1.98289	3.98028	0.0460359	1
Cdk12	0.555958	5.11009	0.902204	0.342191	1
Crbn	0.570466	5.97093	2.08407	0.148843	1
Nkain4	1.93019	1.14449	1.29034	0.255985	1
Pamr1	-1.03638	1.56922	0.56731	0.45133	1
Pde8a	0.937011	2.90746	0.900225	0.342721	1
Pus7l	-1.03771	3.07076	2.79681	0.094452	1
Taf1	0.517444	4.75392	0.992718	0.319079	1
Slc4a2	-0.462681	2.33381	0.334616	0.562954	1
Api5	-0.0688733	6.70817	0.0465229	0.829228	1
Gmpr	-2.03004	2.66334	4.31295	0.0378233	1
Syt11	0.0806136	4.28547	0.0178634	0.893676	1
Wdr81	0.0381009	4.65562	0.00422542	0.948171	1
Rere	-0.110927	5.19319	0.0711798	0.789627	1
Arrdc1	-0.509555	5.44711	1.50501	0.219902	1
Tmod1	0.554701	7.83109	0.223677	0.636252	1
Ndrg2	-0.671319	4.63838	0.520339	0.470697	1
Rbfa	0.206219	4.51593	0.208425	0.648005	1
Laptm5	-0.273728	7.05261	0.618693	0.431533	1
Eef1akmt1	-0.216546	4.07441	0.220721	0.638491	1
Arid4a	0.60092	5.18243	1.87692	0.170684	1
Snrnp48	0.466716	4.56109	0.866702	0.35187	1
Setmar	-0.539619	2.15341	0.479297	0.488741	1
Ift22	0.269445	3.10643	0.115256	0.734237	1
Orm1	2.8146	4.5927	0.874999	0.349575	1
Dleu2	-0.750433	5.44333	2.95005	0.0858751	1
Aaed1	0.0452339	5.02247	0.0109867	0.916521	1
Ggct	0.641994	4.42263	2.13687	0.143795	1
E2f8	-1.09413	0.617067	0.497028	0.480809	1
Uevld	0.799387	2.87644	0.890804	0.34526	1
Trbc2	-0.227499	8.29779	0.190317	0.662653	1
Tiparp	0.268343	5.46127	0.467789	0.494006	1
Tox	-2.28461	1.24869	3.22718	0.0724252	1
Cnn3	-0.40958	5.8028	0.482233	0.487412	1
Id1	2.06819	1.24669	2.28753	0.130417	1
Adat1	-1.54015	1.58644	1.35075	0.245147	1
Immp2l	0.873361	1.93891	1.08999	0.296473	1
Ece1	-0.765883	2.28057	0.999415	0.317452	1
Ssr4	0.336084	6.49786	0.491575	0.483226	1
Rbm4b	0.0909445	3.13942	0.0142796	0.904881	1
Tmem256	0.221412	9.9704	0.0694313	0.792167	1
Gemin7	-0.174855	5.08505	0.198983	0.655543	1
Bphl	-0.0705194	3.23311	0.0103954	0.91879	1
Ndufa11	0.507967	5.68779	0.834301	0.361032	1
Gm13577	1.46904	1.23838	1.50425	0.220019	1
Rwdd4a	0.138325	3.93532	0.0566249	0.811912	1
Hcfc2	1.13935	3.8939	2.54703	0.110502	1
Sdhc	-0.0929551	5.02005	0.0434192	0.834938	1
Zdhhc4	-0.519339	3.67111	0.663113	0.415463	1
Shprh	0.526813	4.61279	1.24491	0.264526	1
Nsg2	-0.173969	5.62405	0.0847895	0.770909	1
Tstd1	0.241065	1.50471	0.0604674	0.805759	1
Med10	-0.118211	4.53193	0.103474	0.7477	1
Kcnk13	2.30014	1.28047	1.39705	0.237217	1
Klf4	-0.198831	4.14572	0.0943187	0.758757	1
Trbv13.3	-0.053949	3.18144	0.00541303	0.94135	1
Trim21	0.00420087	5.94004	9.31719e-05	0.992298	1
2600006K01Rik	0.618638	2.40654	0.302969	0.582027	1
Hpx	4.37768	6.55213	1.69527	0.192908	1
Dusp14	-1.16523	2.25417	0.94986	0.329755	1
Srsf9	0.240713	4.37172	0.295218	0.586896	1
Znfx1	-0.185445	6.46599	0.178242	0.672888	1
Manf	0.523549	6.02245	1.36642	0.242428	1
Ighm	0.248308	10.7682	0.369089	0.543501	1
Atp5d	-0.292583	5.53756	0.299936	0.583922	1
Mfsd10	-0.0401004	2.87174	0.00303583	0.95606	1
Pik3ap1	-0.109317	4.18636	0.0480852	0.826429	1
Tmem55b	0.467945	4.39495	0.848328	0.357026	1
Psap	-0.197939	8.13088	0.265088	0.606646	1
Sod2	0.349438	7.57935	0.32112	0.570935	1
Optn	0.0479838	6.22399	0.00622784	0.937099	1
Cops7b	-0.616556	2.24816	0.506562	0.476631	1
Ikzf3	0.0781009	6.42581	0.0415703	0.838441	1
Dcaf10	0.480328	5.19199	0.873536	0.349978	1
Nudt5	0.719749	4.98312	2.21002	0.137117	1
Pilrb1	-0.31658	5.64348	0.728113	0.393496	1
Chmp3	0.576205	7.10566	2.28485	0.130642	1
Scpep1	0.325612	6.0269	0.600217	0.438495	1
Myl12a	-0.39516	7.82942	1.53386	0.215534	1
Cab39	-0.0753183	7.73648	0.0553363	0.814025	1
Stim1	-0.528037	5.20324	1.95731	0.161802	1
Ildr1	0.899941	1.05121	0.358953	0.549088	1
Erh	0.460616	4.98331	1.31791	0.250968	1
Adprm	0.332876	4.53328	0.609672	0.434911	1
Kbtbd8	0.133412	2.54242	0.0286303	0.865635	1
Atp23	1.33863	1.59231	1.71765	0.189995	1
Rnf157	0.121443	2.86773	0.0210826	0.884554	1
Pid1	0.172384	4.18803	0.0679283	0.794377	1
Ston2	-1.34764	4.4862	2.64339	0.103982	1
Ntpcr	-0.184908	2.0583	0.0330712	0.855697	1
BC100530	-2.68934	1.10494	2.1292	0.144516	1
Psmd13	-0.134511	6.38783	0.144157	0.704183	1
H2.T22	0.113501	8.75518	0.0567744	0.811669	1
Cactin	-0.0329718	3.74962	0.0037748	0.951009	1
Lat2	-0.225688	6.15069	0.47028	0.492858	1
Lrmda	-1.03704	1.8579	0.841116	0.359078	1
Rock2	0.100558	5.40308	0.0484781	0.825733	1
Ubap2	-1.10615	1.94815	1.05907	0.303428	1
Traf1	0.00803307	4.62161	0.000279201	0.986669	1
Cwc27	0.591753	3.73021	0.947886	0.330258	1
Igfbp2	3.5787	2.46038	1.74449	0.18657	1
Dhx34	-1.24673	2.30599	3.04334	0.081069	1
Etfrf1	0.812077	3.90736	2.55755	0.109768	1
Tmem126a	0.607112	4.41784	0.891459	0.345082	1
Kif1b	0.522072	4.82426	1.57975	0.208797	1
Psip1	0.222564	6.08253	0.436151	0.508986	1
G530011O06Rik	4.96382	0.630607	8.64199	0.00328502	1
Chchd10	0.692182	4.78294	0.638024	0.424427	1
Ahnak	0.882594	8.49167	3.38113	0.0659469	1
Msantd4	0.139843	4.10209	0.060547	0.805633	1
Gad1	-1.73785	3.67815	1.5523	0.212797	1
M6pr	-0.117683	7.85624	0.140766	0.707521	1
H2afx	-0.0751615	1.6647	0.00341323	0.953412	1
Clock	1.70122	3.23512	4.39602	0.0360229	1
Evi5l	-0.896835	2.25652	0.864969	0.352352	1
Sbf1	-0.684524	4.78233	1.20027	0.273267	1
Stxbp3	0.0297945	5.49275	0.00431358	0.947634	1
Zfp367	1.66363	3.29208	3.18206	0.0744506	1
Arl6	1.7522	0.837758	1.33178	0.248489	1
Relb	-0.904909	4.77551	4.07049	0.0436385	1
Bod1	-0.552424	2.85801	0.515839	0.472622	1
Pdia3	0.375558	7.70077	1.21678	0.269993	1
Mapk1ip1	-0.344883	3.00179	0.352035	0.552963	1
Zfp324	0.248806	2.40132	0.114733	0.734819	1
Cep295	0.00101626	4.56559	3.81197e-06	0.998442	1
Slc6a6	0.480419	4.74757	1.26992	0.259782	1
Ncbp3	0.577313	4.63681	2.18857	0.139038	1
Abcb1a	0.905598	3.01698	0.904045	0.341699	1
Ppcs	-0.731952	2.72005	0.921631	0.337047	1
Etfbkmt	1.08465	3.40461	1.86873	0.171621	1
Cd44	-0.601843	6.88583	2.03193	0.154025	1
Tmem203	-1.00717	2.56597	2.38267	0.122688	1
Nek4	1.15649	2.2777	0.938169	0.332749	1
5830417I10Rik	0.311307	1.48158	0.0752982	0.783773	1
Phf7	0.394786	3.70521	0.570259	0.450156	1
Rab1a	0.411129	6.25327	1.79314	0.180545	1
Rpgrip1l	1.43311	1.82894	1.5062	0.219719	1
Mutyh	-1.45815	1.92774	2.25609	0.13309	1
Lage3	0.225178	4.49583	0.274399	0.600396	1
Bend6	1.94328	0.849084	1.42037	0.233343	1
Camk1d	0.214466	4.67363	0.202731	0.652525	1
Amz2	0.0739376	4.47095	0.0200663	0.887352	1
Gm7609	0.0136071	1.19128	0.000114345	0.991468	1
Ndufab1	-0.195767	4.40501	0.103492	0.747678	1
Fbxo9	0.69195	9.6669	0.621264	0.430578	1
Ccr1	0.315098	7.22706	0.38632	0.53424	1
Txk	-0.204327	5.19239	0.188721	0.663983	1
Smim15	0.320758	5.63138	0.667595	0.413891	1
Slc39a9	-0.45382	4.02566	0.715913	0.397488	1
Gm3724	-0.00336399	4.32059	1.32206e-05	0.997099	1
1600012H06Rik	0.00140977	4.61025	1.57948e-05	0.996829	1
Mrpl57	0.890196	3.9397	4.0728	0.0435789	1
Ccdc124	-0.780004	3.73461	1.58598	0.207901	1
Nme6	0.388371	2.61249	0.19452	0.659181	1
Zmynd11	0.209403	4.44436	0.214267	0.643443	1
Abhd12	-0.433638	5.16386	0.732159	0.392184	1
Mthfr	0.0913699	4.0674	0.0208635	0.885152	1
Gm47469	1.23928	1.39845	0.856595	0.354693	1
Cstf3	0.162796	4.00538	0.0834382	0.772691	1
Ddx6	-0.242537	6.65498	0.394221	0.530089	1
Stxbp6	0.312662	1.68175	0.0832634	0.772923	1
Gtpbp6	0.212729	2.0583	0.0770555	0.781328	1
Lipt2	2.04654	1.037	2.40785	0.120728	1
Cd28	-0.191081	5.46833	0.21771	0.64079	1
Tomm7	0.541003	6.07018	1.89708	0.168406	1
Extl2	0.374709	2.40144	0.228669	0.632512	1
Kti12	-0.51033	3.03488	0.471212	0.49243	1
Efcab2	-0.276115	2.55402	0.0889911	0.765464	1
Fcrla	0.0290888	6.42328	0.00418293	0.948432	1
Impa1	0.240879	5.23677	0.45866	0.498251	1
Gzmk	0.564552	5.55918	0.159069	0.690015	1
Lrp10	-0.0602287	5.43212	0.024101	0.876628	1
Gm12657	-0.314073	1.96605	0.095635	0.757132	1
Nom1	-0.392605	4.64004	1.03328	0.30939	1
Elob	0.383353	8.8749	0.301467	0.582964	1
Zgpat	-0.297127	3.74797	0.234831	0.627964	1
Dscc1	0.485886	1.84519	0.213003	0.644423	1
Clec4n	-0.377518	4.43668	0.363557	0.546537	1
Tal1	-0.62143	5.28173	0.954055	0.328689	1
Tcn2	0.321746	5.47196	0.286505	0.592469	1
Zfp709	0.668045	3.84919	1.54213	0.214301	1
Dtx2	0.75577	2.04186	0.538763	0.462946	1
Sit1	-0.742282	3.76633	0.763837	0.382131	1
Rsu1	-0.531861	6.94785	0.959977	0.327193	1
Arv1	-0.696841	1.78682	0.463277	0.496096	1
Anp32a	0.0830699	7.26914	0.0629395	0.801909	1
Sqstm1	0.33962	9.03148	0.382328	0.53636	1
Ddx41	0.0827898	5.71291	0.0500173	0.823033	1
Spag1	0.537292	1.54071	0.243564	0.621644	1
Flii	-0.423409	5.9394	1.44723	0.228973	1
Nqo2	-0.183595	4.98947	0.149091	0.699405	1
Papd4	-0.00695161	5.21248	0.000267189	0.986958	1
Prkcq	-0.842983	7.50435	4.07174	0.0436064	1
Abcb1b	0.343796	3.09631	0.221704	0.637745	1
Camk2g	-0.884991	3.30296	2.38541	0.122473	1
Gm26517	0.416025	1.16899	0.116024	0.733387	1
Matr3	0.156622	7.00915	0.207167	0.648997	1
Mpc1	-0.086362	4.814	0.0396761	0.842115	1
1300017J02Rik	1.11176	6.49302	0.596317	0.439987	1
Pcyt1b	0.8833	3.15522	1.0899	0.296493	1
Ttbk2	-0.131244	2.1224	0.0129772	0.909303	1
Cops4	-0.362611	5.70404	1.03656	0.308624	1
Klhdc10	-0.0128214	4.1871	0.000877581	0.976367	1
Bambi	0.340667	0.842144	0.0726165	0.787565	1
Zfp280b	-0.49182	1.38794	0.187494	0.66501	1
Cenpw	2.82564	2.05983	8.94905	0.00277614	1
Cdk2ap1	-0.382114	4.21316	0.856308	0.354774	1
Cavin2	-1.0319	6.55704	1.60398	0.20534	1
Gm12276	-0.336675	0.994251	0.079904	0.777428	1
1110002L01Rik	0.908613	3.43128	1.69072	0.193506	1
Tmem128	-0.00494383	5.45042	0.000201195	0.988683	1
Myl9	-1.66621	9.18964	4.33759	0.0372797	1
Rbm15b	0.288813	4.72715	0.385498	0.534675	1
Cobll1	0.477795	2.21497	0.260182	0.609995	1
Gpr146	-0.00778459	5.15787	0.000272178	0.986837	1
Med30	0.620831	4.53586	1.88938	0.169272	1
Tars2	-0.134198	4.55375	0.093971	0.759188	1
Ak2	-0.259597	5.90669	0.318993	0.572213	1
Lap3	-0.329152	4.42041	0.309525	0.577972	1
Orc3	0.315053	5.25384	0.442758	0.505794	1
Dmac2	-0.0591868	3.5926	0.00679641	0.934297	1
F2rl1	-0.624096	3.13707	0.687234	0.407107	1
Hebp1	0.351716	7.30748	0.100119	0.751687	1
Mttp	2.83079	1.4167	2.12478	0.144934	1
H2.Ab1	-0.226824	9.02265	0.314876	0.574703	1
Rpl32	0.209011	10.0223	0.339088	0.560356	1
Foxred1	-0.049439	4.96603	0.0165045	0.897777	1
Fyco1	-0.24149	5.00833	0.241793	0.622914	1
Paip2	0.413732	9.82479	0.517771	0.471794	1
Ptpn13	1.59699	1.94841	1.57369	0.209672	1
Slc25a28	0.375869	3.96699	0.38642	0.534187	1
Tmod3	0.111644	7.57317	0.107364	0.743165	1
Slc25a45	-0.229639	5.89166	0.41271	0.520597	1
Bap1	-0.14079	5.00053	0.138201	0.710076	1
Gtf2e1	-0.246022	4.16519	0.247654	0.618732	1
9130401M01Rik	0.192526	2.66524	0.0565122	0.812096	1
Mrpl22	-0.820112	3.1178	1.63093	0.201574	1
Cxcl9	-0.651088	3.73328	0.458014	0.498553	1
Htra1	3.2274	1.10707	3.16858	0.0750679	1
Zfp759	-0.132595	2.19527	0.0232124	0.878906	1
Zfp281	0.0228291	5.00188	0.00217764	0.96278	1
Kat8	0.0558837	4.26693	0.00789575	0.929195	1
Zfp821	-0.552241	3.60591	1.04738	0.306112	1
Pcnx	-0.196184	3.90722	0.141857	0.706442	1
Surf1	0.248658	5.09286	0.298416	0.584877	1
Exoc6b	-0.741889	2.59428	0.975362	0.323347	1
rn1	0.694144	5.24415	3.28995	0.0697051	1
Ptpn6	-0.555706	8.30835	2.14742	0.14281	1
Gmeb2	-0.571456	3.18069	0.505303	0.477179	1
Gm20506	-0.90154	2.68383	1.11927	0.290075	1
Cetn2	0.00268292	6.61328	3.22697e-05	0.995468	1
Iscu	-0.147183	9.88018	0.0305351	0.861282	1
Papss2	0.467345	3.01458	0.20617	0.649786	1
Amn1	-0.455785	4.26542	0.627295	0.428349	1
Il13ra1	-0.18226	5.85171	0.154852	0.693941	1
Txndc11	-0.169828	4.20034	0.150278	0.69827	1
Kat5	-0.642102	4.93273	2.86785	0.0903656	1
Trpc4ap	-0.311655	6.2922	0.788138	0.374664	1
Tbpl1	-0.10236	5.34404	0.0654098	0.798141	1
Dguok	0.216179	4.6684	0.430145	0.511918	1
Nckap1	-1.07259	5.16341	2.21519	0.136658	1
Fcho1	-1.05993	3.41029	1.88063	0.170263	1
Nf1	-0.100695	2.26019	0.00991463	0.920684	1
2010309G21Rik	-0.0542573	2.68388	0.00180109	0.966149	1
0610030E20Rik	0.188508	3.93237	0.11348	0.736216	1
Qk	0.374531	5.94532	0.894542	0.344249	1
Tmem50a	0.129934	7.87518	0.102122	0.749298	1
Sde2	0.224317	4.6811	0.310047	0.577651	1
Alas1	-0.461977	4.76453	0.486715	0.485396	1
Ambra1	-0.35667	4.2805	0.478056	0.489304	1
Kif2a	-0.905236	7.0064	2.28693	0.130468	1
Fam241a	-0.291801	4.95323	0.266709	0.605548	1
Hck	-0.49333	8.19023	1.51934	0.21772	1
Ptdss2	0.509733	4.33768	0.670007	0.413049	1
Sptssa	-0.106462	4.87441	0.0823436	0.774146	1
Myof	0.72949	4.7603	1.01384	0.313985	1
Smpd1	-0.321385	3.84127	0.333421	0.563651	1
1600002K03Rik	0.429752	2.72469	0.287908	0.591564	1
Cdca8	0.130331	3.48027	0.0224121	0.880996	1
Psma5	1.13088	7.37511	7.84623	0.00509268	1
1110008F13Rik	0.14727	6.99391	0.149735	0.698788	1
Pced1a	-0.00527595	2.36253	2.80365e-05	0.995775	1
Alyref	0.110564	4.8207	0.0472869	0.827853	1
Serpine2	-1.78481	3.98332	2.97225	0.0847038	1
Mfsd9	0.402045	1.41402	0.100733	0.750952	1
Jup	0.175817	1.74474	0.0233018	0.878675	1
Wdr45	0.130016	3.82786	0.0757567	0.783132	1
2810403A07Rik	-0.0193717	5.5166	0.00203065	0.964057	1
Ndufaf2	1.02583	1.9862	0.850808	0.356324	1
Ttc7	-0.332292	5.34644	0.635593	0.425311	1
Rmdn2	-0.329532	1.16335	0.0423895	0.836879	1
Zkscan14	-0.756578	4.57524	2.1298	0.144459	1
Agpat4	0.228982	4.14481	0.303909	0.581442	1
Gatad1	-1.06627	7.05375	3.08151	0.0791868	1
Dse	0.586562	4.22121	1.23048	0.267314	1
Cgnl1	1.65338	3.57476	1.53738	0.215008	1
Cnppd1	0.0972589	6.20399	0.0606952	0.805401	1
N4bp2l1	0.208796	4.91032	0.16658	0.683169	1
Stat5b	-0.298309	6.15479	0.573146	0.449011	1
Pyurf	0.295313	2.84281	0.132699	0.71565	1
Shisa5	-0.261075	9.83582	0.438857	0.507674	1
2310011J03Rik	-0.439564	4.31397	0.877804	0.348804	1
Smurf1	-0.434254	3.29544	0.569631	0.450406	1
Ppat	-0.0445556	3.83825	0.00703089	0.933175	1
Letm1	-0.478916	4.2664	1.26149	0.261368	1
Mvd	-0.954327	3.46136	1.69871	0.192457	1
Gnl3l	0.485058	4.23947	1.08512	0.297555	1
Zcchc18	0.0505677	3.4499	0.00853228	0.926404	1
Srebf1	-0.133009	3.87218	0.0486934	0.825353	1
Bcl2l2	0.0137575	2.38513	0.000215342	0.988292	1
Chmp1a	-0.402369	6.52282	0.949401	0.329872	1
Ssbp4	-0.63975	2.77977	0.682033	0.408888	1
Cep350	-0.126594	4.26999	0.0577183	0.810139	1
Ces2g	0.460636	2.61843	0.171066	0.679166	1
Ermap	1.28247	3.36	1.16591	0.280244	1
Olfr56	-0.343283	3.47033	0.154771	0.694017	1
Smad1	0.495015	1.91544	0.236974	0.6264	1
Pabpc4	0.399953	7.70934	0.287192	0.592026	1
Cenpq	0.926886	6.1197	1.72292	0.189317	1
5830428M24Rik	-0.709213	3.08346	1.69071	0.193507	1
F2r	0.243459	5.00356	0.157948	0.691053	1
Pcmt1	-0.818479	7.37414	2.519	0.112482	1
Traf6	-0.508761	4.93805	1.15932	0.281606	1
Ap3d1	-0.32567	5.84576	0.971407	0.32433	1
Zfyve1	0.509948	3.2904	0.619199	0.431345	1
Slc7a6	-0.291545	3.91093	0.307222	0.57939	1
Coasy	-0.209921	3.53439	0.0984695	0.753674	1
Fmc1	0.518664	2.71972	0.619291	0.431311	1
Ogn	6.50353	1.71105	7.34159	0.00673772	1
Zfp764	0.0327148	3.43263	0.00358183	0.952276	1
Myo9a	1.17147	3.32212	4.47057	0.0344835	1
Cmklr1	1.40075	1.66068	1.8169	0.177683	1
2700081O15Rik	0.238939	1.84736	0.0368627	0.847745	1
Upf3a	-0.662036	4.70103	2.54609	0.110567	1
Runx2	-0.104735	2.37143	0.0116679	0.913981	1
Ifng	-0.591678	2.78992	0.277489	0.598352	1
Dock1	-1.42645	1.235	0.982257	0.321642	1
Ado	-0.0250036	3.74496	0.00284794	0.95744	1
Zbtb32	1.10297	3.24226	1.39132	0.238183	1
Tldc1	-0.178484	2.90689	0.0701641	0.791098	1
Rhof	-0.213875	2.95164	0.122114	0.726753	1
Mctp1	-1.14111	5.4694	1.20072	0.273178	1
Ctdnep1	-0.490268	4.2935	1.40447	0.235977	1
Pmpcb	-0.0111322	5.42803	0.000617166	0.98018	1
Smc3	0.239482	6.09751	0.386992	0.533885	1
Plcl1	1.33956	1.1823	0.910586	0.339959	1
Fam110a	-1.68654	0.863689	1.67483	0.195613	1
Pon3	0.779153	3.038	0.462331	0.496536	1
Arid5b	-0.241509	3.93603	0.148658	0.699821	1
2410006H16Rik	-0.148672	5.49744	0.110074	0.74006	1
Rab6a	-0.066856	6.18185	0.0208982	0.885057	1
Mad2l1	-0.533794	4.37416	0.791737	0.373575	1
Sars2	-0.0789015	2.15339	0.00881267	0.925208	1
Ccnl2	0.00239892	6.87683	3.4858e-05	0.995289	1
Ube2l6	-0.238971	14.0714	0.0660788	0.797134	1
Tex9	0.484309	2.79405	0.255042	0.613547	1
Celf1	0.59871	5.72423	2.51248	0.112948	1
Ces3a	0	3.97327	0	1	1
Ift122	1.53807	0.896282	1.24658	0.264206	1
Dhx57	-0.131175	4.71257	0.111105	0.73889	1
Mmd	-1.21564	7.96758	1.5543	0.212501	1
Adat2	-0.250981	1.29448	0.0363147	0.848867	1
Rpl30	0.194243	9.73764	0.265992	0.606033	1
Trp53bp1	-0.218999	4.44067	0.205144	0.6506	1
Pigq	0.59958	6.49017	1.09218	0.295988	1
Trnau1ap	0.132563	4.46134	0.0561995	0.812607	1
BC051226	-1.14148	1.69997	1.6751	0.195577	1
Pi4kb	-0.271779	5.28893	0.489873	0.483984	1
Rps5	0.0421509	9.70041	0.0126629	0.910403	1
Klc4	-0.980282	3.84454	3.32775	0.0681199	1
Acbd6	-0.157291	3.51471	0.073984	0.785622	1
Coq10b	0.136503	4.18787	0.0689313	0.792899	1
Gm49024	1.76647	2.24057	1.47078	0.225222	1
Kif1c	0.197147	3.85398	0.116945	0.732372	1
Cyp3a11	3.62017	3.67366	1.17725	0.277916	1
Cnot11	0.103183	4.34048	0.0437357	0.834346	1
Gns	-0.05538	6.76168	0.0206085	0.885851	1
Dpp3	-0.450885	5.33596	0.928137	0.335347	1
Arf5	0.294229	6.30593	0.155581	0.693258	1
Dph2	0.0772475	2.29395	0.00840221	0.926965	1
Lclat1	-0.103674	3.45622	0.0389962	0.843456	1
Yap1	-1.76748	3.79973	3.37034	0.0663799	1
Rdh10	-0.00269167	2.48698	1.1957e-05	0.997241	1
Invs	-0.298898	3.1394	0.214229	0.643473	1
2810021J22Rik	0.333677	2.58918	0.179221	0.672044	1
Sec24d	-0.314398	3.06271	0.176497	0.674401	1
Apbb1ip	0.798076	2.2434	0.414244	0.519823	1
Ms4a8a	0.919835	5.35408	0.628966	0.427735	1
2410089E03Rik	1.82985	1.41095	2.84811	0.0914815	1
H2.M3	-0.518675	6.0306	1.84183	0.174737	1
Serpina1a	3.35042	5.68396	1.71018	0.190962	1
Taldo1	-0.196064	10.384	0.110078	0.740055	1
Mlh3	-0.379313	2.61623	0.21527	0.642667	1
Psmb3	-0.185695	6.97979	0.189275	0.663521	1
Ccp110	1.6219	2.72394	2.455	0.117151	1
Slc39a10	0.496656	3.70762	0.552002	0.457501	1
Ola1	0.106627	5.51876	0.0940743	0.75906	1
Pak1ip1	-0.013732	5.15793	0.00110279	0.973508	1
Nop14	-0.967154	3.00685	1.83253	0.17583	1
Prcc	-0.463411	2.50908	0.42264	0.515623	1
Zfr	-0.275469	6.29109	0.539959	0.46245	1
Ccdc71	-0.722748	4.38439	2.0731	0.149917	1
Fcna	1.72411	5.90659	1.38112	0.23991	1
Letm2	-0.196677	3.26412	0.0667797	0.796085	1
Map4k3	0.814028	3.16516	1.44581	0.229201	1
Ino80d	0.0638641	4.51976	0.0176863	0.894201	1
BC065403	2.50958	1.67869	2.72384	0.0988602	1
Parvg	0.352486	3.83237	0.309356	0.578076	1
Utp20	0.29584	4.01485	0.272268	0.601814	1
Rundc1	-0.670756	3.2746	1.21567	0.270211	1
Rbm39	0.151493	8.28516	0.164553	0.684999	1
Gsr	-0.260337	7.51601	0.307402	0.579279	1
Ighv1.75	0.613027	1.41447	0.533559	0.465114	1
Adarb1	1.37767	1.15665	1.1911	0.275107	1
Tlr4	0.604418	4.36742	1.16937	0.279531	1
Csgalnact2	0.313903	5.06214	0.486758	0.485377	1
Arid5a	-0.997654	5.0335	4.63087	0.0314017	1
Pgm2l1	-0.661496	5.43284	0.979476	0.322328	1
Tyw1	0.0382649	3.88456	0.00467863	0.945467	1
Gm19585	0.0814634	4.9843	0.0149993	0.902525	1
Riok3	0.108683	11.6766	0.0166557	0.897313	1
A930009A15Rik	0.198175	0.769743	0.0170118	0.896227	1
Asah2	1.32697	2.17101	1.19113	0.275102	1
Ctdsp1	-0.103298	4.41601	0.0535943	0.816923	1
Zcchc24	0.650945	2.46477	0.432882	0.510578	1
Myl2	-2.20149	2.54515	1.93714	0.16398	1
Map3k4	-0.346621	3.68587	0.31857	0.572468	1
Dpf2	0.134921	2.81332	0.0398058	0.841861	1
Mst1	-0.785651	1.84313	0.239861	0.624306	1
Mad1l1	0.270511	1.4807	0.0326805	0.856542	1
Man2a2	0.289147	4.86393	0.555322	0.456151	1
Rbbp8	0.33036	5.18246	0.839881	0.359431	1
Gm6421	0.309075	4.77843	0.14572	0.70266	1
Shc1	-0.20568	5.51243	0.309249	0.578141	1
Klhl36	-0.453717	1.86902	0.235474	0.627494	1
Sepsecs	0.68918	3.4009	1.00245	0.316719	1
Med11	0.6019	4.11754	1.10684	0.292769	1
Gm18852	0.158553	3.13029	0.0228726	0.879789	1
Fgd2	0.226999	5.76548	0.357793	0.549735	1
Zfp143	0.141615	4.6397	0.0671366	0.795552	1
Aurkb	0.55172	3.6947	0.373428	0.541142	1
Ighv1.18	0.753905	1.88923	0.651272	0.419658	1
Plcg1	-0.761633	5.62983	3.45392	0.063102	1
A430005L14Rik	0.492962	3.59674	0.815631	0.366461	1
Fam133b	0.447638	4.66667	0.703537	0.401598	1
Madd	-0.5145	5.46583	1.33937	0.247145	1
Spg11	0.138323	4.35208	0.0758625	0.782985	1
Zfp706	-0.068505	6.52412	0.0344106	0.852836	1
Foxred2	-0.365729	2.50483	0.156049	0.69282	1
Tstd3	0.449914	4.62058	0.836301	0.360457	1
Irak2	0.245757	4.37412	0.331278	0.564907	1
Sesn1	0.13537	6.35984	0.133918	0.714404	1
Slc25a12	-0.599487	5.53531	2.33492	0.126501	1
Dnase1l1	-0.206638	4.87248	0.127038	0.721524	1
Hmgn2	0.156966	6.50687	0.126026	0.722588	1
Nlrx1	-0.703151	4.05547	1.34507	0.246142	1
Gm11827	-1.85996	0.439405	0.891808	0.344988	1
Tspyl4	-0.156381	2.92021	0.0473812	0.827684	1
AU040320	1.1429	2.60223	1.38417	0.239393	1
Bbs9	-0.0780392	3.71277	0.0142877	0.904855	1
Prpf3	-0.235557	3.36132	0.118736	0.730409	1
Slamf1	-1.09818	6.49975	2.34221	0.125911	1
Gm6563	0.695698	3.90524	1.33292	0.248287	1
Irf6	-0.101571	1.58325	0.00845248	0.926748	1
Tmprss13	0.929248	1.93558	0.510129	0.475083	1
Polr2j	0.128668	5.18769	0.109482	0.740735	1
Gm41307	0.173897	1.11755	0.0163082	0.898384	1
Mrps30	-0.329189	4.83991	0.493748	0.48226	1
Snx2	0.510052	7.72877	2.02565	0.154662	1
Dennd1c	-0.231144	2.71395	0.0713644	0.78936	1
Psmd7	-0.0746718	5.20342	0.0255855	0.872917	1
Fem1c	-0.267522	4.53278	0.30419	0.581268	1
Natd1	0.729808	1.81184	0.628035	0.428077	1
Cdk8	0.383563	4.86345	0.622636	0.43007	1
Csrp2	1.22681	3.15402	1.5212	0.217439	1
5730480H06Rik	0.548764	2.47004	0.507317	0.476303	1
Qprt	-0.545338	1.63109	0.187463	0.665037	1
Oscp1	2.06954	1.19766	2.20834	0.137266	1
Tnfsf14	-1.16614	4.86536	3.40264	0.065092	1
Ube2k	0.235801	4.59685	0.328398	0.566604	1
Gimap6	0.0562257	8.90354	0.0237755	0.877457	1
Zfp280d	0.215188	4.19261	0.0994053	0.752544	1
Gm26917	-0.903383	1.57411	0.772092	0.379571	1
Edaradd	0.0570061	2.2953	0.00463605	0.945715	1
Stap1	0.152488	6.18221	0.107752	0.742718	1
Gm4208	-0.566953	1.05613	0.129715	0.718728	1
Mfhas1	0.342348	3.39362	0.261184	0.609308	1
Snhg6	0.547845	3.86608	0.978815	0.322492	1
Lamp1	-0.332897	8.10043	0.816347	0.36625	1
Tmem181b.ps	-0.622677	2.00982	0.444954	0.504741	1
Klri1	-0.654752	1.71553	0.318829	0.572312	1
Rapgef4	0.238725	3.45732	0.143144	0.705175	1
Cand1	-0.321885	5.98646	0.811	0.367825	1
Polr3a	-0.181295	4.39374	0.202805	0.652466	1
Pfkfb2	0.548902	1.46705	0.271523	0.602312	1
Zfp954	-0.409126	4.54058	0.762591	0.382519	1
Wdr89	0.784628	2.41558	1.43123	0.231564	1
Phf3	0.133336	6.26542	0.154324	0.694437	1
Prpf38a	0.277071	5.27585	0.291634	0.589175	1
Lnx2	-0.58747	2.85508	0.755416	0.384767	1
Tpt1	0.0921658	12.0904	0.0236154	0.877868	1
Gstcd	-0.298637	2.409	0.105089	0.745806	1
Asl	0.441999	4.86475	0.290493	0.589905	1
Tspan33	0.675743	8.02118	0.228013	0.633001	1
Trak2	1.34424	8.2306	2.84685	0.0915533	1
Osgep	-0.173771	4.85473	0.11547	0.734	1
Oxld1	0.756506	1.91081	1.34327	0.246459	1
Srsf4	-0.10816	3.32721	0.028195	0.866651	1
Cd14	1.07017	5.01763	1.49461	0.221503	1
Gpatch4	0.449354	2.80145	0.326144	0.567938	1
Casd1	-0.188686	4.73644	0.120424	0.728575	1
Olfml3	1.45483	1.25248	0.702748	0.401862	1
Egfl7	1.98262	1.94512	2.06435	0.150779	1
Ap3m2	0.226365	3.66246	0.146166	0.702227	1
Ccdc6	-0.504633	4.45299	1.27457	0.258911	1
Slc35b4	-0.682013	3.49981	0.941876	0.331796	1
Timm44	0.0608066	4.87059	0.0214462	0.88357	1
Gabarap	0.374593	9.72706	0.577263	0.447387	1
Jak1	-0.082867	9.00047	0.0594587	0.807354	1
Gm15708	-1.20454	0.888609	1.00163	0.316916	1
Gprasp1	0.441754	4.21642	0.516294	0.472427	1
Zdhhc6	0.153952	5.49607	0.199526	0.655104	1
Camp	0.471189	4.95058	0.152879	0.695799	1
Gm4045	0.557431	3.05546	0.290171	0.590111	1
Tlr3	1.44086	1.6696	1.96311	0.161182	1
Rpl37a	-0.00518025	10.1587	0.000166683	0.989699	1
Tspan14	-0.506618	6.08815	1.89535	0.1686	1
Ear2	-0.293198	6.0876	0.1071	0.74347	1
Sdf4	-0.195678	7.99743	0.34558	0.556626	1
Gm37254	0.210833	1.98076	0.0532761	0.817458	1
Rrp7a	-0.444162	5.23101	0.920731	0.337283	1
Fastkd1	-0.00312675	2.64726	1.66972e-05	0.99674	1
Hist1h3d	-0.373616	1.65447	0.127724	0.720804	1
Por	-0.723418	3.47322	1.17505	0.278366	1
Tppp3	0.196309	5.59607	0.102468	0.748888	1
Canx	0.146721	7.43632	0.192405	0.660922	1
Jmjd8	-0.68054	3.4574	1.14153	0.285329	1
Tax1bp3	-0.383989	2.78318	0.262201	0.608612	1
ist	0.0706756	7.78136	0.026917	0.869681	1
Nsmce2	-0.0517652	3.93162	0.00890174	0.924832	1
Crtc1	0.150054	1.63785	0.0263746	0.870989	1
A930005H10Rik	-1.08815	3.56433	2.55078	0.11024	1
A130010J15Rik	0.384499	2.5535	0.324927	0.568662	1
Ppp2r5c	-0.0866909	7.34668	0.0696488	0.791849	1
Rbbp9	-0.7659	2.31389	1.1286	0.288074	1
Arhgap27	-0.0120128	3.89337	0.000462835	0.982836	1
Ap5z1	0.100945	2.39963	0.0120069	0.912746	1
Herpud1	-0.305359	5.07643	0.633687	0.426006	1
Pxylp1	0.0862932	2.88119	0.0175833	0.894508	1
Hbb.bs	-0.398738	15.7103	0.142394	0.705913	1
Mllt10	0.0914478	4.08104	0.0347913	0.852034	1
Prkcsh	-0.475599	4.6107	0.999958	0.317321	1
Rnf19a	0.0144183	5.25605	0.00115479	0.972891	1
B3galnt2	0.166496	4.83981	0.164166	0.685349	1
Setdb2	0.565126	4.48544	1.08098	0.298477	1
Actr1b	-1.14999	3.47026	3.93771	0.047215	1
Adgre4	0.0690495	6.76661	0.00643778	0.93605	1
Dnaaf2	0.786467	1.35215	0.404622	0.524712	1
Vps33b	-0.277263	4.23408	0.437659	0.508254	1
Cdkal1	0.403932	3.35075	0.255929	0.612931	1
Itpr1	0.358994	5.7827	0.911776	0.339644	1
Ube2w	0.389996	4.38985	0.570403	0.450099	1
Arhgap27os3	-0.205529	2.71183	0.0662455	0.796884	1
Add1	0.236443	4.78263	0.226649	0.634019	1
Cep57	0.458585	4.62064	1.13331	0.28707	1
Brd8	0.0158621	4.9941	0.00109719	0.973576	1
Gclc	0.018448	4.7064	0.0012712	0.971558	1
Chfr	0.126733	5.72584	0.174463	0.676175	1
Gnptg	-0.695199	5.05097	2.57081	0.108852	1
Yif1a	-0.0751876	3.67023	0.0207584	0.885439	1
Nebl	0.260692	2.67309	0.024012	0.876854	1
Srf	-0.928939	3.74788	2.10317	0.146994	1
Dock9	0.414197	3.08979	0.254473	0.613943	1
Bcl11a	0.0352771	3.13155	0.00237203	0.961156	1
Apmap	0.623001	4.65907	1.80549	0.17905	1
Bbx	-0.0836572	4.22843	0.0239251	0.877076	1
P2ry2	0.574926	1.7202	0.302759	0.582158	1
Elp4	1.01173	2.561	0.957358	0.327853	1
Rpl22	0.570371	8.58183	2.8123	0.0935441	1
Trub2	-0.541951	4.09229	1.31085	0.25224	1
Nfkbil1	-0.10387	1.87926	0.0186374	0.891411	1
Mrpl11	0.542179	4.04694	0.909707	0.340192	1
Slc2a6	0.224407	5.54278	0.195531	0.658353	1
0.11	0.591391	6.36603	2.65449	0.103258	1
Snrpb2	0.387743	5.492	0.86949	0.351097	1
Hal	0.944053	3.42251	0.411036	0.521444	1
Pcm1	0.33345	4.36555	0.419629	0.517122	1
Tpcn2	-0.77459	3.57102	1.59137	0.20713	1
Ttc39a	0.692742	4.01932	0.283724	0.594271	1
Gimap1os	0.321592	2.8727	0.194194	0.659449	1
Srsf3	0.18172	7.61495	0.267415	0.605071	1
Nuak2	-0.264019	3.53479	0.181962	0.669692	1
Psma6	0.246729	7.40543	0.507451	0.476244	1
Rnf141	0.843784	4.89561	3.66878	0.0554407	1
1700021A07Rik	0.682996	0.33853	0.166174	0.683535	1
Fancl	-0.412483	3.80898	0.502382	0.478455	1
Myg1	-0.458608	3.83527	0.680382	0.409455	1
Rpl19.ps11	-0.0240674	2.86015	0.00171471	0.96697	1
Anxa4	0.183839	5.16869	0.152207	0.696435	1
Mmp13	0.82498	2.0608	0.398614	0.527806	1
Ddit4	-0.410424	4.17786	0.366027	0.545178	1
Fga	4.87364	4.47633	1.49276	0.221789	1
Ctla4	1.18644	4.98849	1.61745	0.203448	1
Gsdme	-1.47986	2.08709	1.79777	0.179982	1
Farsa	-0.0049654	5.26708	0.000123504	0.991133	1
Ecd	0.218507	5.20773	0.283087	0.594685	1
Bcl2l13	0.177636	4.6639	0.146656	0.701752	1
Apoh	4.33086	4.92945	3.02286	0.0820985	1
Kyat1	-0.230756	2.30531	0.0656498	0.797779	1
Nacc1	0.461067	3.30707	0.380012	0.537597	1
Ext1	-0.0102222	4.21051	0.000458035	0.982925	1
Mprip	-0.79845	5.87195	3.80103	0.0512209	1
Psmd9	-0.167133	3.31791	0.0485619	0.825585	1
Rpl3l	-2.56344	1.45673	4.9432	0.0261934	1
Eme1	0.560365	1.76425	0.159579	0.689545	1
Tlnrd1	0.692109	2.2112	0.665341	0.414681	1
Mif	-0.580051	4.32371	0.938064	0.332776	1
Rab37	-0.964064	4.14396	3.1957	0.073832	1
Exosc5	-0.364271	3.865	0.475649	0.4904	1
Sin3b	0.430049	7.76233	0.870568	0.350798	1
Cpeb4	0.746863	4.03961	0.884319	0.347022	1
Wdr77	-0.411211	3.84593	0.415826	0.519027	1
Ddhd2	0.49594	3.70455	0.736268	0.390859	1
Pmaip1	0.206979	4.68537	0.120874	0.728089	1
Gm15931	-0.622443	3.93168	0.720911	0.395845	1
Ldha	-0.0018822	7.15199	1.74744e-05	0.996665	1
Trdv4	2.04161	1.07379	1.3882	0.23871	1
Tlr1	0.096765	6.28224	0.0803598	0.77681	1
Slain1	0.369476	4.09887	0.385761	0.534536	1
Gfod1	-0.929149	2.87468	2.26983	0.131915	1
Suv39h2	0.94522	1.25934	0.527581	0.467626	1
Upf1	0.0789034	3.49991	0.0165716	0.897571	1
Fbxo34	0.181172	3.75828	0.0758047	0.783065	1
Gm33104	-0.225276	2.67485	0.0804937	0.776629	1
Klra13.ps	-0.368929	4.91621	0.145094	0.703268	1
Baz1b	-0.00326207	6.09408	7.84282e-05	0.992934	1
Minos1	0.604868	4.81422	1.38903	0.238569	1
Znrf3	3.13996	1.79142	6.24716	0.0124392	1
Pygo2	-0.133612	4.10113	0.0688715	0.792987	1
Prpf39	-0.0259299	4.94626	0.00355063	0.952484	1
Rabggtb	0.186845	4.64728	0.170922	0.679294	1
Copb1	-0.189735	6.74326	0.307881	0.578983	1
BC028528	0.595313	4.69673	1.34426	0.246284	1
Hist2h2be	-0.827134	2.77926	0.935999	0.333309	1
Cep95	-0.331279	4.13184	0.326319	0.567835	1
Trbd1	0.894134	1.81812	0.774096	0.378953	1
Crispld2	-1.88316	4.0302	2.58818	0.107664	1
Hnrnpul1	0.00108655	4.64469	5.36202e-06	0.998152	1
Pls3	2.00139	2.00219	1.65457	0.198338	1
Txndc17	0.368386	6.00094	1.1769	0.277988	1
Snw1	-0.0887958	6.81191	0.0699308	0.791438	1
Rap2a	-0.988731	3.89277	2.32362	0.127423	1
Sec23a	1.03225	6.30035	2.33221	0.126721	1
Eri1	-0.142566	5.66854	0.126179	0.722427	1
Vpreb3	-0.945809	2.46386	1.17918	0.277523	1
F10	0.200145	6.54574	0.0537327	0.816691	1
Cdc5l	0.0173357	6.91325	0.00290099	0.957046	1
Rps18	-0.068073	9.67061	0.0294004	0.863858	1
Tor1a	-0.00400804	4.01583	6.80913e-05	0.993416	1
Cask	-0.372889	3.56617	0.305425	0.580501	1
Lig1	0.323552	3.88053	0.245566	0.620215	1
Fry	0.790573	3.74499	1.63831	0.200558	1
Tesk1	-0.542645	2.2951	0.359128	0.548991	1
Itfg2	0.575395	1.63688	0.446063	0.50421	1
Rara	0.205823	1.79641	0.0328462	0.856183	1
Slx1b	-1.04531	1.79502	1.26355	0.26098	1
Ighv1.39	0.429104	1.02398	0.123279	0.725505	1
Mipep	-0.386269	3.22373	0.389064	0.532792	1
Jun	-0.131936	3.73239	0.0447005	0.832556	1
Pcmtd1	0.402333	6.28446	0.814883	0.366681	1
Acsl3	0.525405	2.6476	0.261834	0.608863	1
Rabac1	-0.492468	5.61892	1.25721	0.262179	1
Emp1	1.38546	4.13468	3.73978	0.0531314	1
Mrpl30	0.577487	6.75834	2.3665	0.123965	1
Zfp869	-0.402893	5.12974	0.93748	0.332927	1
Srsf7	-0.110906	6.56128	0.0621854	0.803075	1
Ap2a2	-0.268252	5.8472	0.640556	0.423509	1
Gps2	0.310156	3.3295	0.238452	0.625327	1
Epas1	1.68787	2.44395	1.19094	0.275141	1
Arpc3	0.213196	7.79256	0.385073	0.534901	1
Ly75	0.295776	3.99872	0.365603	0.545411	1
S100pbp	-0.386467	3.38995	0.479627	0.488591	1
Rbp4	2.72692	4.51652	1.01473	0.313772	1
Mfap3l	-1.37704	5.23547	1.69633	0.192769	1
Cln3	-0.517565	4.51825	1.31878	0.250811	1
Zzef1	0.140241	4.08258	0.0632199	0.801477	1
Emsy	-0.209667	3.70431	0.110979	0.739032	1
Rab11b	-0.428643	5.10408	1.08575	0.297414	1
Actr10	0.042447	6.47507	0.0187117	0.891196	1
Mylk3	0.937457	5.27352	0.740075	0.389637	1
Gm32051	2.46999	9.86736	2.73793	0.0979919	1
Rmdn1	0.845547	1.94385	0.579781	0.446398	1
Rnf130	-0.048878	6.80408	0.025474	0.873192	1
Dzip1	-1.68766	3.36656	3.82906	0.0503713	1
Rrs1	1.52869	2.85025	3.47701	0.0622273	1
Rif1	0.0296	4.50516	0.00399057	0.94963	1
Gstk1	-0.399657	2.83637	0.175206	0.675526	1
Mcm8	0.447361	1.85009	0.132142	0.716222	1
Tmem120b	0.606687	1.28977	0.232208	0.629892	1
Rev3l	0.111682	4.94583	0.0345022	0.852643	1
Plp2	-0.310297	5.94033	0.692483	0.405321	1
Cyp27a1	0.175926	4.51541	0.0720037	0.788441	1
Eif2s2	0.517812	6.95676	1.69695	0.192688	1
Ints14	0.406329	4.99134	0.833619	0.361228	1
Mrto4	-0.613152	2.77336	0.856343	0.354764	1
Trmt10c	0.41367	4.24031	0.463437	0.496022	1
Cln8	0.336552	5.57429	0.266272	0.605844	1
Lrig2	-0.0609333	3.88396	0.00768359	0.93015	1
Mbl2	0	3.46026	0	1	1
Sgms2	-1.1448	3.30641	2.98402	0.08409	1
Gm6634	-1.28744	6.32231	1.07959	0.298789	1
Zap70	-0.363114	4.88831	0.321277	0.570841	1
Pars2	0.336735	2.27781	0.0995167	0.75241	1
Atad2	0.650796	5.03127	2.25666	0.133041	1
Tgfbr3	0.428931	2.20028	0.199849	0.654843	1
Zfp113	-0.128393	2.72066	0.0300118	0.862463	1
Prepl	0.565179	3.26516	0.487531	0.485031	1
1110046J04Rik	-1.22787	2.22575	0.872481	0.350269	1
Kcmf1	0.383087	6.05291	0.928495	0.335254	1
Fam206a	0.467689	2.90672	0.313123	0.57577	1
Jtb	-0.541645	5.12829	2.52063	0.112366	1
Akr1c6	0	3.78289	0	1	1
Marveld1	0.671647	3.72294	0.663315	0.415392	1
Cep76	0.717284	5.86758	0.829972	0.362281	1
Wwp2	0.520116	6.79965	1.22071	0.269222	1
Car1	1.06271	3.81382	0.939206	0.332482	1
Klhl9	0.300115	5.47887	0.609226	0.435079	1
Slc6a4	-1.74225	5.96507	3.10279	0.0781584	1
Tmem221	-0.312167	1.92766	0.0708691	0.790076	1
Tcp11l1	0.0606432	2.48159	0.00344033	0.953227	1
Prkag2	-0.239129	3.55616	0.199321	0.655269	1
Lcn4	0.105254	2.13649	0.00918948	0.92363	1
Otud3	-0.0793065	1.83464	0.00895873	0.924592	1
Tmem65	-0.048866	3.93257	0.00782549	0.92951	1
Mturn	0.163888	4.1285	0.107752	0.742718	1
5830444B04Rik	-0.000745484	1.51272	5.55486e-07	0.999405	1
Zfp335	-0.288664	2.58356	0.194874	0.65889	1
Drg1	0.12337	5.91119	0.0944322	0.758616	1
mt.Rnr1	-0.39502	9.28755	0.149971	0.698563	1
Sntb2	0.290016	3.99031	0.258868	0.610899	1
Itpripl1	-0.479895	3.88149	0.80001	0.37109	1
Fam126a	0.29672	7.70719	0.17171	0.678597	1
Atp8b2	-0.6858	5.20396	2.23351	0.135047	1
Tm2d1	0.516012	3.51973	0.672273	0.41226	1
Ddx18	0.636377	3.45999	0.97578	0.323243	1
Ifit1	0.603225	8.90084	0.775173	0.378621	1
Cd7	-1.67836	3.34585	5.36907	0.0204969	1
Cytip	-0.218399	8.82225	0.38507	0.534902	1
Tlcd2	2.90646	1.8334	3.15955	0.075484	1
Ccdc82	-0.13923	5.35992	0.120073	0.728956	1
Alb	7.45992	10.2259	3.69993	0.0544148	1
Apob	0	4.71215	0	1	1
Hltf	0.19065	5.71539	0.225664	0.634758	1
Uqcc2	0.378806	4.18615	0.414854	0.519516	1
Mmp8	-0.463449	8.32599	0.419466	0.517203	1
Nphp1	2.2792	0.908459	2.37742	0.123101	1
Slc9a7	0.10404	2.89676	0.0181459	0.892844	1
Ftl1.ps2	0.785736	2.86535	0.706163	0.40072	1
Lgals4	-1.28781	1.86878	1.60546	0.205131	1
Tgm1	-1.55916	1.26379	1.2746	0.258906	1
Gabpa	0.657735	5.2695	2.04622	0.152585	1
Crybg1	-0.0763488	6.16714	0.0457875	0.830563	1
Atp6v1h	0.0879441	5.48848	0.0463128	0.829608	1
Helb	0.229581	4.7892	0.286664	0.592366	1
Nup37	0.477448	3.42838	0.596059	0.440086	1
4921524J17Rik	0.837698	3.39268	1.81733	0.177632	1
Acod1	0.754189	6.37699	0.897266	0.343516	1
Il18r1	-0.0175138	5.23467	0.000929749	0.975675	1
Rxrb	-0.821785	4.73804	3.34728	0.0673163	1
Rnf44	-0.45437	2.73734	0.506814	0.476521	1
Il9r	0.582985	3.14529	0.527279	0.467753	1
Zfp422	1.08429	3.96459	3.26445	0.0707966	1
Aida	-0.0408193	6.50267	0.0123994	0.911337	1
Gm11613	-0.0136728	1.30678	0.000178416	0.989343	1
Pdlim2	0.102729	3.5844	0.0275548	0.86816	1
Arfgef1	-0.0621935	6.29153	0.0331437	0.85554	1
Gstm4	0.637312	1.48306	0.378085	0.53863	1
Gga3	-0.450993	3.48741	0.493663	0.482298	1
Syt13	-1.03412	3.58973	0.701309	0.402344	1
Ubap2l	-0.035686	3.40095	0.00265148	0.958933	1
Smyd2	1.14887	2.65983	1.9174	0.166144	1
Lat	-0.678722	6.3931	1.79657	0.180128	1
D430019H16Rik	1.73175	0.579977	0.855447	0.355016	1
Pltp	0.0949225	3.22889	0.00859267	0.926145	1
Isoc1	-0.202861	4.92734	0.208139	0.64823	1
Ccne2	-0.177009	2.35069	0.0184082	0.892077	1
Dlgap5	0.181477	4.06744	0.0625864	0.802454	1
Sp100	0.12529	8.01192	0.10162	0.749894	1
Atxn1	0.245883	4.07309	0.0921874	0.761414	1
Sik2	0.819677	1.83456	0.595863	0.440161	1
Bcat2	-0.330688	3.80293	0.29026	0.590054	1
Srr	0.546411	2.86383	0.61331	0.433544	1
Mterf4	0.293621	3.70232	0.157296	0.691658	1
Cetn3	0.786852	4.87505	2.36692	0.123932	1
Tmem138	0.0372818	2.20071	0.00126208	0.97166	1
Wac	0.0711799	5.88281	0.04225	0.837144	1
Mpdu1	0.089898	4.87452	0.0254385	0.873279	1
Ccdc186	0.683543	3.98342	1.33829	0.247335	1
Mtus2	1.15492	0.998609	0.457738	0.498683	1
Eloc	0.297728	7.01936	0.465843	0.494906	1
Gtf3c6	0.260483	4.3747	0.376794	0.539324	1
Mast3	-0.292298	3.82923	0.276655	0.598902	1
Fam69a	0.147616	5.28668	0.116937	0.73238	1
Arl1	0.0246718	5.90573	0.00426328	0.94794	1
Ranbp9	0.254271	6.06227	0.659499	0.416737	1
Clns1a	-0.0666721	5.47983	0.0312125	0.859767	1
Zfp456	-0.596133	3.82165	1.03367	0.309298	1
Frmd4b	0.363003	4.58122	0.417307	0.518284	1
Dbt	0.27512	3.53154	0.207604	0.648652	1
1810030O07Rik	0.0815437	5.38806	0.0435968	0.834606	1
Fbxo38	0.510105	6.4253	2.07487	0.149743	1
Pde4dip	0.161574	4.02773	0.101883	0.749581	1
Prkrip1	0.353507	3.5685	0.362675	0.547024	1
Rrp1b	0.798982	3.11408	1.14888	0.283784	1
Trbv17	-0.451292	2.87185	0.242287	0.622559	1
Amdhd2	-0.65992	3.68913	1.02291	0.311829	1
Edrf1	0.0741933	4.65209	0.029444	0.863758	1
Sgo1	0.173318	2.4874	0.0218151	0.88258	1
Selenoo	-0.310992	4.79059	0.47833	0.48918	1
Creb3	-0.158316	5.41162	0.17154	0.678747	1
Trappc2	-0.88074	4.27912	2.07754	0.149481	1
Exosc2	-0.0853923	4.43189	0.0397983	0.841875	1
Fubp1	0.107017	6.01248	0.052876	0.818132	1
Pafah2	-0.78922	2.67671	0.701668	0.402224	1
Brpf3	0.545571	4.09643	0.545127	0.460316	1
Homez	0.691323	2.38023	1.15166	0.283202	1
Tmco1	0.0650343	5.54466	0.0358022	0.849925	1
Gatb	0.498646	3.01809	0.471232	0.492421	1
Klhl28	0.556545	4.12841	1.11626	0.290724	1
Wbp11	-0.499022	2.21544	0.297501	0.585453	1
H2.Ob	0.0156673	8.1331	0.00175175	0.966615	1
Phf1	-0.616699	3.84263	1.31396	0.251679	1
Gimap3	-0.271581	6.43538	0.52663	0.468027	1
Asnsd1	0.645873	3.63185	2.01247	0.156011	1
Qtrt2	0.364736	2.60387	0.146524	0.70188	1
Epn1	0.398396	4.73099	0.640283	0.423609	1
Rida	-0.421051	5.39984	0.218007	0.640563	1
Pex5	0.0396908	4.61151	0.00695726	0.933525	1
AA467197	-0.357404	2.06067	0.096684	0.755846	1
Gm4610	0.62481	1.83545	0.541289	0.461899	1
Mill2	0.698374	1.60058	0.372544	0.541621	1
I830127L07Rik	-0.426854	6.58399	0.816404	0.366234	1
Cog6	0.100625	4.46993	0.0676661	0.794766	1
Akt1	-0.426878	5.36533	0.95953	0.327305	1
Pithd1	0.59984	8.01441	0.836588	0.360374	1
Pdlim1	-0.640352	6.86756	1.71384	0.190487	1
Nsd3	0.420402	5.87103	1.42716	0.232229	1
Mterf3	0.346367	4.58541	0.42935	0.512308	1
Cd300a	-0.10145	6.2356	0.0524443	0.818863	1
Atr	0.218458	5.03136	0.256242	0.612714	1
Wdr46	-0.165286	3.35328	0.0675186	0.794985	1
Gabpb1	0.133727	3.67162	0.0530805	0.817787	1
Pcnx3	-0.616498	2.96195	0.851461	0.356139	1
Acp5	-0.301602	5.94305	0.639169	0.424012	1
5430427O19Rik	-0.451357	4.97637	0.994541	0.318635	1
Chmp6	-0.205712	4.44188	0.0814212	0.775381	1
Dnlz	-0.352247	3.87966	0.411231	0.521345	1
Rgs3	-0.0173419	4.51988	0.00127752	0.971488	1
Nxpe2	0.388387	7.14819	0.15946	0.689654	1
Jdp2	-0.932515	2.39926	0.934449	0.333709	1
Map4k2	-0.610567	6.06358	2.78325	0.0952548	1
Zbtb38	1.25364	4.2988	3.32607	0.0681895	1
Sec11c	-0.0690194	7.03875	0.0292978	0.864093	1
Atxn3	0.580142	4.93497	1.34021	0.246997	1
Tfpt	0.231472	2.69927	0.0807231	0.77632	1
Tmed10	0.169387	6.1039	0.202707	0.652544	1
Apoa5	0	3.49018	0	1	1
Smc5	-0.241479	4.85522	0.326101	0.567964	1
Dram1	0.287964	4.81661	0.236407	0.626813	1
Fam173a	0.188471	4.02527	0.0926851	0.760791	1
Slc41a3	-0.953	2.07972	1.33605	0.247731	1
Pex11a	2.39983	0.872104	1.53935	0.214715	1
Crlf2	-0.154586	2.43092	0.0312719	0.859635	1
Zfp882	2.49488	1.664	3.34082	0.0675809	1
Abhd5	0.596416	5.72433	1.40328	0.236174	1
Pck1	4.61224	2.94117	3.19426	0.0738971	1
Tram2	-0.139089	2.02425	0.0259122	0.872115	1
Hfe2	-2.34345	2.2512	1.50683	0.219623	1
Lin37	0.42242	2.37294	0.217613	0.640864	1
Gk5	3.41614	1.52056	4.6134	0.0317231	1
Samd9l	0.505194	8.59682	0.799948	0.371109	1
Mtrf1	1.45425	2.13869	2.01141	0.15612	1
Phf11b	0.105232	7.38655	0.0441299	0.833612	1
Tk1	1.37323	3.86808	2.90851	0.0881133	1
Thop1	-0.166591	2.0354	0.0244423	0.875765	1
Rhoc	1.34624	3.66886	1.78697	0.181296	1
Dars2	-0.152763	3.78586	0.0518457	0.819882	1
Zbtb48	-0.321585	2.33409	0.175927	0.674897	1
Il2rg	0.482041	5.82785	1.3615	0.243278	1
Ckap2l	1.01661	3.30552	1.04554	0.306537	1
Mcph1	0.187597	3.54088	0.0922834	0.761294	1
Mrvi1	-1.00722	5.49212	1.76158	0.184428	1
Cutc	0.100248	3.60939	0.0270688	0.869317	1
Psmd11	0.225981	5.6196	0.407687	0.523146	1
Polr1e	0.0983103	4.01633	0.0313706	0.859416	1
Arhgap6	-1.49109	2.68096	2.75144	0.0971667	1
Metrnl	-0.068254	4.86124	0.0184314	0.892009	1
Tcta	0.57327	4.82339	1.06042	0.303118	1
D430042O09Rik	0.575672	2.61067	0.422958	0.515465	1
Wdr7	0.289643	3.61328	0.241087	0.623422	1
Slc25a20	0.310155	5.61923	0.475086	0.490657	1
9530082P21Rik	1.20994	1.95488	0.964292	0.326108	1
Rnmt	0.620928	5.61268	1.80536	0.179066	1
Thap12	0.568669	5.30967	2.16236	0.141427	1
Nup188	-0.08457	3.38115	0.0119901	0.912807	1
Ovgp1	-0.7145	2.25694	0.499393	0.479767	1
Adamts6	0.409398	3.6208	0.485836	0.485791	1
Slc11a2	-0.4194	3.60287	0.542261	0.461497	1
Ncf1	-0.0167158	7.75847	0.00195382	0.964743	1
Tlr12	-0.957795	1.36151	0.726402	0.394052	1
Mynn	0.0507319	3.84342	0.00871024	0.925642	1
Serp2	-1.55737	1.30235	1.71551	0.190272	1
Tpd52l2	0.0899503	5.99898	0.0645633	0.799424	1
Ino80c	0.0150186	5.617	0.00168742	0.967234	1
Agtr1a	0.047581	1.85328	0.0015207	0.968893	1
Taf1d	0.334885	5.53514	0.625634	0.428961	1
Rps4l	0.97369	1.37123	1.12911	0.287965	1
Msi2	-0.616837	4.87317	1.41902	0.233565	1
Acbd3	0.219942	4.87515	0.292942	0.588341	1
Gm9294	1.19345	1.5376	2.75207	0.0971284	1
Kif3c	-1.02881	2.77552	1.71928	0.189786	1
Fam212a	-0.0923106	2.81056	0.0130271	0.90913	1
Fabp7	2.85177	3.5196	1.27999	0.257901	1
Cwc15	0.478091	6.8689	2.24331	0.134193	1
Syce2	-0.0256666	2.29882	0.00055296	0.981239	1
Rras2	-0.387628	6.11348	0.626759	0.428547	1
Snhg15	0.745341	2.24854	0.559158	0.4546	1
Serpina1c	1.91615	6.31095	0.894335	0.344305	1
Gm47015	-1.26265	3.26827	2.07402	0.149826	1
Ppp1r37	-0.425603	2.89782	0.432191	0.510916	1
Sprtn	0.437635	4.65673	1.16679	0.280061	1
Mpg	-0.00519174	4.20768	0.000132257	0.990824	1
Rasgrp2	-1.10382	7.31365	5.60874	0.0178711	1
Ldb1	-0.967588	5.37444	6.38664	0.0114982	1
Klrc2	-1.85245	4.05088	8.09574	0.00443694	1
Chpf	-0.961882	1.85782	1.21591	0.270164	1
Asrgl1	-0.0485037	4.62332	0.0132743	0.908275	1
Stard3nl	0.280545	4.54016	0.261974	0.608767	1
Trp53rka	-0.268443	3.13624	0.208745	0.647753	1
Bicd2	-0.94632	5.49289	2.38032	0.122872	1
Ubox5	0.189314	1.95723	0.0465301	0.829215	1
Rcan3	-0.159741	3.25064	0.0762282	0.782475	1
A430078G23Rik	-0.769672	3.13454	1.07258	0.300364	1
Zfp605	-0.0469041	2.14642	0.00172226	0.966897	1
Zfp993	-1.78647	0.869983	0.828083	0.362828	1
Champ1	0.234828	3.26178	0.140305	0.707978	1
Scnm1	-0.0353142	4.19747	0.00444451	0.946847	1
Nxn	0.0750828	3.37881	0.0122539	0.911856	1
Sephs1	0.178036	4.58922	0.138846	0.709431	1
Pcmtd2	0.508408	5.47368	1.18501	0.276338	1
Ms4a7	0.521114	1.17242	0.155254	0.693565	1
Plekhg2	-0.871725	1.93989	1.10978	0.29213	1
Erich1	-0.345897	2.38657	0.284218	0.59395	1
Smim5	-0.398683	1.59921	0.171569	0.678721	1
Selenok	0.353501	7.54397	0.316011	0.574015	1
Eif3f	-0.0844155	7.17386	0.0691174	0.792626	1
Uqcrq	1.28757	4.32478	3.4655	0.0626615	1
Sphk2	-0.155628	2.42278	0.0312919	0.859591	1
Trbv2	-0.491377	2.86381	0.391486	0.531519	1
Lactb2	0.447891	3.82405	0.634922	0.425556	1
Ndufv3	-0.178887	5.70524	0.150925	0.697653	1
Dtymk	-0.0275122	4.72127	0.00315053	0.955239	1
Cep78	0.331302	3.01643	0.158152	0.690863	1
Lrrc58	0.700419	3.77864	1.80122	0.179565	1
Gm30054	-0.192429	4.26817	0.17978	0.671563	1
Pitpnm2	-0.719797	0.849621	0.379222	0.53802	1
Ttc30a1	0.794174	1.70043	0.383165	0.535914	1
Get4	-0.488236	4.30921	0.800496	0.370945	1
Cuedc2	0.176377	4.40937	0.0960265	0.756651	1
2810025M15Rik	0.050134	1.68815	0.00168763	0.967231	1
Txndc5	0.0126629	6.59277	0.00126889	0.971584	1
Bcas2	0.476501	6.08524	0.968579	0.325035	1
Dmtn	0.706236	4.33143	0.483974	0.486628	1
Adh5	-0.0691032	6.29411	0.0357314	0.850071	1
Cers6	-0.275007	6.13789	0.570258	0.450156	1
Nmt1	0.202206	6.7448	0.407353	0.523316	1
Inpp5a	-0.918472	3.87125	2.88307	0.0895151	1
Mrpl28	-0.80118	4.24105	3.84012	0.0500399	1
Snhg8	0.184569	2.93746	0.0900069	0.764168	1
Rab24	0.108103	5.07063	0.0792667	0.778294	1
Tulp4	-0.0864457	3.25281	0.0143219	0.904741	1
Msn	-0.0933983	7.93564	0.0763627	0.782288	1
H2.D1	-0.249416	11.5845	0.288394	0.591252	1
Sypl	-0.125034	5.23389	0.0980053	0.754237	1
Mtpn	-0.109841	7.48353	0.0964549	0.756126	1
Nfx1	-0.244939	5.73305	0.497908	0.480421	1
Arel1	0.424775	6.69162	1.16307	0.28083	1
Treml4	-0.102386	5.59968	0.0203299	0.886619	1
Gm10101	1.11829	1.31341	0.499685	0.479638	1
Hs3st1	-0.82361	0.902105	0.560959	0.453874	1
Pygb	-0.967887	6.4047	5.61979	0.0177588	1
Cstb	0.140185	5.11372	0.119047	0.73007	1
A430035B10Rik	0.936895	2.17252	1.18012	0.277331	1
Mfge8	0.144616	2.10537	0.0256343	0.872797	1
Nck2	-1.21418	4.95252	3.22544	0.0725023	1
Ankmy2	-0.073091	4.35671	0.0261435	0.87155	1
Zbtb7b	-0.201991	4.59138	0.143885	0.704449	1
Il6st	0.358788	5.48863	0.70203	0.402102	1
Rnf2	-0.40578	5.31643	0.721542	0.395638	1
Dip2c	2.77111	1.46376	3.67439	0.0552545	1
Trim30d	0.174355	6.20715	0.087962	0.766784	1
Strap	0.273442	5.83091	0.40424	0.524907	1
2700062C07Rik	0.820031	3.3377	1.90722	0.167272	1
Acp6	0.386871	3.42052	0.340432	0.55958	1
Kif13a	-0.0939048	2.88325	0.0126612	0.91041	1
Ctdspl	2.11432	1.62735	3.42294	0.0642965	1
Fam46a	0.291515	5.83483	0.352029	0.552967	1
Ccdc94	-0.11298	2.48266	0.0251889	0.873897	1
Asb1	0.634683	9.17831	0.564864	0.452307	1
Gm42547	-1.38264	1.30637	1.55895	0.211819	1
Fam98a	-0.317662	4.03209	0.358445	0.549371	1
Trim47	1.42019	1.20551	1.11426	0.291157	1
Slamf7	0.0928842	5.60377	0.0279998	0.867109	1
Btbd7	-0.0966025	4.62902	0.04159	0.838403	1
Gm6768	-0.521617	3.25612	0.26802	0.604663	1
Nsrp1	0.422974	3.93065	0.703036	0.401766	1
AU022252	0.875144	3.34882	1.9109	0.166863	1
Hdac2	-0.122962	5.1406	0.0559293	0.81305	1
Slc35a4	0.146619	4.31129	0.0697089	0.791761	1
Pidd1	-0.383843	1.33435	0.0904817	0.763566	1
Snx6	-0.0107665	6.08045	0.000750743	0.978141	1
Tnip3	1.22048	2.54175	1.80942	0.178578	1
Tut1	-0.686308	4.08983	2.13102	0.144345	1
Rnf220	-0.458354	5.3426	1.32047	0.250508	1
Lats2	-0.269531	4.0486	0.200762	0.654107	1
Abcc4	-0.31315	4.12166	0.419974	0.51695	1
Rwdd2a	-0.230014	1.69569	0.0466894	0.828927	1
Abhd17a	-0.75458	3.69343	1.33274	0.248318	1
Nufip1	0.421607	4.12735	0.87248	0.35027	1
D2hgdh	-0.271936	3.19773	0.157931	0.691068	1
Rps15a.ps6	0.962673	1.36156	1.35774	0.24393	1
Gm15448	-0.348576	2.93837	0.125832	0.722793	1
Snap47	-0.440533	3.37785	0.426641	0.513642	1
Armc8	-0.0278045	4.90414	0.00364244	0.951875	1
Ccdc127	0.106741	4.48572	0.063764	0.800643	1
Casc3	0.168932	4.27215	0.15553	0.693305	1
1810014B01Rik	-0.574236	1.82538	0.377931	0.538713	1
Pou2f1	0.983676	3.49263	3.24169	0.0717868	1
Thap2	-0.316612	3.12774	0.108226	0.742173	1
Hectd3	-0.294531	5.32837	0.631358	0.426858	1
Rhoq	0.137127	5.51126	0.0785555	0.779265	1
Slc50a1	-0.368331	5.37999	0.948767	0.330033	1
Pgap2	-0.474798	4.04726	0.938543	0.332653	1
Gcnt1	0.348958	5.60814	0.476891	0.489834	1
Rhobtb2	0.0438415	3.22417	0.00590733	0.938736	1
Cuta	-0.693521	4.25477	2.01905	0.155336	1
Slc2a9	-1.0723	2.76475	1.39395	0.237739	1
Haspin	-0.396018	3.44977	0.303889	0.581454	1
Isg15	0.745763	10.7965	0.710251	0.39936	1
Zfp566	-0.00991819	1.44683	7.57243e-05	0.993057	1
Slc20a2	0.51301	3.05083	0.49716	0.480751	1
Tns3	0.345675	2.74889	0.223676	0.636253	1
Slc35e2	0.157466	3.26341	0.0489103	0.82497	1
Slc12a7	-0.188471	2.96983	0.0675661	0.794914	1
Ube4b	-0.1328	4.09949	0.0688489	0.79302	1
Endov	0.817506	2.69473	0.690471	0.406004	1
Emp3	0.225473	6.54861	0.300314	0.583685	1
Nupr1	0.389533	4.79551	0.47582	0.490322	1
Tiam2	0.439153	3.89589	0.520421	0.470662	1
Armc2	0.441089	0.453033	0.096879	0.755608	1
Tmem177	-0.0334205	2.65904	0.00214765	0.963037	1
Lpcat1	-0.199193	4.84455	0.229182	0.632131	1
Fas	-0.789828	5.37465	2.89616	0.0887907	1
Snai3	-1.60191	1.06572	1.38703	0.238907	1
9830132P13Rik	-0.0575702	2.47805	0.00222869	0.962347	1
Klhdc4	-0.537168	4.54541	1.0978	0.294749	1
Gigyf1	-0.723753	1.97657	0.890957	0.345218	1
Zfp867	-1.22471	1.31727	1.34938	0.245386	1
Taf6l	0.345689	5.21313	0.888717	0.345825	1
Gm7582	0.619422	1.11889	0.215027	0.642856	1
Gm13436	0.177446	3.06674	0.104585	0.746396	1
Ier3ip1	0.195657	4.19765	0.193242	0.660232	1
Dgkq	-2.32377	1.38916	5.09426	0.0240052	1
Myo7a	1.03014	3.71132	1.89554	0.168578	1
Nhsl2	0.803257	3.44225	0.994404	0.318668	1
Samd1	0.83608	3.91149	1.56494	0.210944	1
Aif1	0.142169	4.50452	0.0589584	0.80815	1
Fv1	-0.68817	1.39357	0.487166	0.485194	1
Plxna4	-1.98549	3.33937	5.55732	0.0184035	1
Vcp	0.512617	8.49004	1.48133	0.223567	1
Prelid1	-0.133623	7.10877	0.103715	0.747416	1
Cops7a	-0.249745	3.62147	0.251195	0.616235	1
Abcb10	0.867936	5.1883	2.11264	0.146087	1
Syne3	-0.827529	3.2697	1.08236	0.298171	1
Nudt14	-0.498649	2.59343	0.604586	0.436833	1
Tmie	0.35165	1.40795	0.0962386	0.756391	1
Grpel1	0.200325	5.70257	0.233103	0.629232	1
Ndufb7	0.210869	5.25204	0.126244	0.722359	1
Ighv5.6	2.09795	1.42176	4.75291	0.0292488	1
F5	-0.631695	6.65551	0.776878	0.378098	1
Blcap	-0.34596	2.46304	0.143871	0.704463	1
Zfp655	0.380546	5.04467	0.807643	0.368818	1
Ttl	1.38881	1.78719	1.51291	0.218696	1
Cct5	-0.194479	8.21459	0.275962	0.59936	1
Rab11fip4	-0.318434	2.68969	0.165464	0.684175	1
Rbmx	0.110591	4.83023	0.0372687	0.846919	1
Blvrb	0.525287	10.1449	0.332091	0.564431	1
Cwf19l2	0.452646	4.24554	0.617807	0.431863	1
Ywhaz	-0.135237	6.17972	0.14101	0.707279	1
Mgmt	-0.822503	2.03895	0.867167	0.351741	1
Immp1l	0.789525	5.55254	2.64179	0.104087	1
Gzmb	0.0521605	8.87718	0.00432181	0.947584	1
Sh3tc1	-0.34678	3.55721	0.24415	0.621225	1
Sufu	0.726613	2.43177	1.18819	0.275695	1
Lsm2	0.0208754	1.86744	0.00042162	0.983618	1
Ctsg	0.711714	0.733851	0.186363	0.665961	1
Ccpg1	-0.552923	3.98933	0.839185	0.35963	1
Gm32856	0.22625	1.93268	0.0688416	0.793031	1
1200007C13Rik	-0.614823	1.23233	0.198457	0.65597	1
L3mbtl3	0.231063	4.58997	0.188425	0.664231	1
Cryz	1.89599	1.58981	2.66041	0.102874	1
Cd2	0.188321	6.95557	0.219129	0.639704	1
Cd200r3	-0.364855	2.27405	0.142849	0.705465	1
Snrpd2	0.439462	5.42025	1.64853	0.199159	1
Wwox	0.831818	2.26439	0.756533	0.384416	1
Egfr	2.45979	1.84338	1.21999	0.269362	1
Scoc	0.824992	5.36045	1.41976	0.233443	1
Pigr	-1.5444	2.89378	0.625072	0.429169	1
Vwa8	0.373088	3.47854	0.289261	0.590694	1
Aatf	0.0229278	4.55917	0.00303089	0.956096	1
Zfp12	0.145983	4.05833	0.0897523	0.764492	1
9830107B12Rik	0.618979	2.95843	0.44617	0.504159	1
Uap1	0.680706	4.7971	1.72786	0.188685	1
Zfp729a	0.584545	4.29122	1.33429	0.248043	1
Mgst2	0.436317	4.42415	0.409545	0.5222	1
Pik3r6	-0.540626	3.91301	0.829823	0.362324	1
Rps25	0.363623	9.55942	1.12117	0.289666	1
Tuba1b	0.340023	7.60816	0.556775	0.455562	1
Lamtor1	0.315432	6.09058	0.733816	0.391649	1
2210016F16Rik	0.0121407	4.96292	0.000543401	0.981402	1
Arrdc4	-0.382069	3.73668	0.33774	0.561137	1
Nif3l1	-0.412818	4.21832	0.647011	0.421183	1
Pilrb2	-0.608053	5.49141	1.77361	0.182936	1
Phc1	0.363218	2.61002	0.190945	0.662131	1
Kntc1	-0.18462	2.9025	0.041519	0.838539	1
Cps1	0	3.24774	0	1	1
Nsun5	-0.951191	2.75364	1.86041	0.172578	1
Mgme1	0.307688	2.55901	0.25342	0.614677	1
Lamp2	-0.182824	7.72931	0.184727	0.667342	1
Ocel1	-0.457747	3.50175	0.780456	0.377002	1
Naa10	-0.900977	3.42353	2.26118	0.132653	1
Ftsj3	-0.212607	5.90267	0.370511	0.542726	1
Mafk	0.343252	5.63233	0.516442	0.472363	1
Acap3	-0.383974	1.82164	0.207762	0.648527	1
D730003I15Rik	-0.0605629	1.53394	0.00360668	0.952111	1
Ric8a	-0.601039	5.78264	3.15414	0.0757344	1
Pcbp4	-0.697391	1.26663	0.319487	0.571916	1
Trp53rkb	0.408711	1.41712	0.0970147	0.755442	1
Meaf6	-0.357199	2.72641	0.316783	0.573547	1
Rgn	0.0525693	3.05378	0.000546042	0.981357	1
Inpp5f	0.446783	4.799	1.30502	0.253298	1
Ikbkap	-0.461399	5.25907	1.74897	0.186007	1
Rnf214	0.582539	1.64564	0.295419	0.586768	1
Fbxl5	-0.134777	7.4724	0.130903	0.717498	1
Smarcad1	0.50831	4.19735	0.91776	0.338064	1
Zfp74	-0.487289	2.71926	0.278115	0.59794	1
Trim8	-0.0122158	2.43908	0.000309622	0.985961	1
AW549877	0.247406	5.30949	0.295669	0.58661	1
Isca1	-0.0586196	11.9514	0.00313022	0.955383	1
Pde6d	0.0616227	3.66152	0.019352	0.889362	1
Gm6566	1.70865	1.23269	1.29364	0.255378	1
Prrg2	-0.714754	1.6789	0.691796	0.405554	1
Ndufaf8	0.0655908	1.69786	0.0079824	0.928808	1
Tfb2m	-0.168645	3.85716	0.106653	0.743987	1
Ccz1	0.176096	6.25763	0.232295	0.629827	1
Secisbp2	0.0655369	4.17815	0.0217332	0.882799	1
Mzb1	0.574315	5.5274	1.30786	0.252782	1
Tbkbp1	-0.727769	3.02207	0.89374	0.344466	1
Krr1	0.0327788	4.85547	0.00602449	0.938132	1
Naa20	0.179722	5.02419	0.107492	0.743018	1
Copb2	0.389504	7.08797	1.69818	0.192526	1
Clptm1	0.0614378	5.07227	0.0227221	0.880182	1
Rexo1	-0.725673	1.97633	0.614503	0.433097	1
Ncoa3	0.347215	4.47175	0.402176	0.525967	1
Spg7	0.601828	5.38083	1.64836	0.199182	1
Prpsap2	-0.450721	5.04545	1.24671	0.264182	1
Zfp763	-0.289842	2.36848	0.127673	0.720858	1
Tmc4	0.0460608	1.79294	0.00212853	0.963202	1
Nfxl1	0.547464	2.8625	0.501157	0.478992	1
9930012K11Rik	1.38795	2.21556	2.28283	0.130813	1
Setd6	-0.701562	3.44272	1.8798	0.170356	1
Btbd10	0.0417171	4.37166	0.00969393	0.921569	1
Rab39	0.93921	2.22869	1.14524	0.284548	1
Klrc3	0.325443	0.69733	0.0448992	0.83219	1
Slc10a3	-0.0130057	3.54535	0.000367971	0.984695	1
Lsm5	0.720625	4.1836	2.28406	0.130709	1
Zfp949	0.273306	4.29823	0.246359	0.619651	1
Fkbp1b	0.695125	1.26016	0.344569	0.557204	1
Mettl1	0.344433	1.88667	0.0989678	0.753072	1
Poll	0.263912	2.69629	0.0930049	0.760391	1
S1pr1	0.28968	6.99109	0.743964	0.388394	1
Bcl2l1	0.969527	6.25305	0.825007	0.36372	1
Sfswap	-0.578302	4.1542	1.63998	0.200329	1
Gca	1.18691	1.92742	1.1456	0.284473	1
Tbc1d8b	0.828676	2.8308	0.659552	0.416718	1
Paxbp1	-0.0679763	5.27674	0.0241719	0.876448	1
Maz	-0.226843	4.95565	0.279638	0.596939	1
Psmg2	0.163997	4.0418	0.0968984	0.755584	1
Galm	-0.227915	2.62496	0.0622812	0.802926	1
Hexim1	-0.14962	4.29652	0.110952	0.739063	1
Dcun1d1	0.433263	7.56003	0.415292	0.519295	1
Dennd5b	0.488255	3.54954	0.615051	0.432892	1
Fig4	0.235349	5.79207	0.330907	0.565125	1
Gm48768	-0.531804	1.19767	0.146977	0.701441	1
Atic	-0.0391447	5.69133	0.0148165	0.903118	1
Eif5a	0.120203	8.07099	0.115434	0.734041	1
Tnfrsf13b	-0.151932	5.57711	0.149895	0.698635	1
Lrch3	0.022726	4.98232	0.00194322	0.964839	1
C230096K16Rik	0.493068	1.53146	0.270062	0.60329	1
Cyp2a5	0	2.054	0	1	1
Agmo	3.43199	2.14631	2.86947	0.0902747	1
Bud13	-0.0581132	1.79438	0.00342681	0.953319	1
1700037H04Rik	-0.787618	3.54978	1.02652	0.310978	1
Ddx10	-0.271427	4.06815	0.13843	0.709847	1
Sbds	0.205277	5.52681	0.350526	0.553815	1
Blvra	0.281905	4.72256	0.315194	0.574511	1
3110002H16Rik	0.568718	7.00833	1.06424	0.302251	1
Nudt18	-1.26785	1.98044	0.944729	0.331065	1
Gm11808	-0.406835	4.74478	0.323305	0.569628	1
Helz2	-0.152281	5.71517	0.0559312	0.813046	1
Exoc6	-0.0865891	6.07854	0.0530178	0.817893	1
Sftpa1	4.70621	3.24036	1.47198	0.225034	1
Cd59a	0.386789	6.40495	0.206888	0.649218	1
Pes1	-0.0012863	6.01644	8.08081e-06	0.997732	1
Rpl14	0.168097	9.2782	0.259601	0.610394	1
Flad1	-0.594709	4.4858	1.07832	0.299074	1
Sfxn1	-0.17694	5.68755	0.164669	0.684894	1
Chac2	0.793819	6.1509	0.774608	0.378795	1
Abhd14a	0.851343	1.60676	0.567742	0.451157	1
Oaz2	-0.15384	6.85497	0.119764	0.729291	1
Adck2	0.704342	1.58632	0.468998	0.493448	1
Zfp282	0.431329	3.01536	0.619855	0.431101	1
Caml	0.189539	4.08431	0.133294	0.715041	1
Nans	-0.0391775	5.34952	0.00597565	0.938383	1
Ankrd36	2.47335	4.34168	1.46436	0.226238	1
Haus7	0.772342	2.79479	1.14121	0.285396	1
Neil1	-0.798379	3.41975	1.73589	0.18766	1
Klhl5	0.336428	4.74697	0.71213	0.398738	1
Slco4c1	-1.16807	1.50013	0.923473	0.336565	1
Hook3	1.09695	4.89485	5.6896	0.0170658	1
Mrpl10	-0.0825434	5.09765	0.0517011	0.820129	1
Snx30	0.0725658	4.88116	0.0202418	0.886864	1
BC055324	1.11214	2.11011	0.889543	0.345601	1
Agfg2	0.926787	3.54984	1.74745	0.186198	1
Ptprc	0.105216	10.2131	0.0721954	0.788167	1
Asb8	0.764643	3.84641	2.31479	0.128149	1
Coq6	-0.871585	3.48472	1.94301	0.163342	1
Shmt2	0.736116	4.08088	2.01362	0.155893	1
Zfp84	0.500929	3.89217	1.05113	0.305248	1
Hdgfl2	-0.486464	4.26438	1.07665	0.299448	1
Nemp2	-0.418405	5.07114	0.933441	0.33397	1
Asprv1	-1.32494	5.82362	3.7116	0.0540356	1
Tcof1	-0.15142	3.61161	0.0458579	0.830434	1
Iffo2	-0.516728	2.70324	0.491842	0.483107	1
Rilpl1	-0.663434	0.794856	0.299394	0.584263	1
Gcc2	0.847293	4.20879	3.21676	0.0728877	1
Ebag9	0.659771	3.76002	1.41723	0.23386	1
Cdk5	-0.0702034	4.32267	0.0229437	0.879604	1
Gm5511	0.166329	1.47723	0.0106486	0.91781	1
Wfikkn2	-1.5245	1.51328	1.2867	0.256657	1
Gss	1.1845	5.4997	1.71494	0.190346	1
Prr3	0.0946395	2.37781	0.0100507	0.920143	1
Alg1	-0.557093	3.05002	0.59058	0.442195	1
Psd4	-0.146663	6.28242	0.148652	0.699827	1
Zswim8	-0.195899	3.19808	0.100156	0.751643	1
C030034I22Rik	1.02252	2.00991	1.07777	0.299197	1
Mat2b	0.20215	7.9026	0.154507	0.694265	1
Ergic3	-0.369869	5.09334	0.752238	0.385769	1
Ahr	-1.08145	3.26482	3.00462	0.0830275	1
Eif4e	0.340433	5.38184	0.718447	0.396654	1
Bicdl1	-0.101054	2.57971	0.0145276	0.904063	1
Akr1e1	1.21722	2.98146	2.21369	0.136791	1
Usp6nl	0.125935	4.06718	0.0709195	0.790003	1
Med18	0.341792	1.71078	0.0827296	0.773632	1
Polr2b	0.116502	6.37466	0.11591	0.733513	1
Rhov	-3.28344	0.499157	4.04504	0.0443013	1
Tmem30a	0.544878	6.43212	2.11352	0.146003	1
Bmf	-0.473605	3.68137	0.389951	0.532325	1
Ddx31	0.434854	3.58113	0.559971	0.454272	1
Frmd8	-0.835912	5.42021	3.53763	0.0599913	1
Usmg5	1.04531	7.18561	4.12793	0.042181	1
Rps24	0.582395	11.1496	1.80755	0.178802	1
4632415L05Rik	-0.0348114	2.29541	0.00132403	0.970974	1
Gatad2a	-0.304536	4.35257	0.508025	0.475995	1
Srgap2	0.253872	4.30751	0.365918	0.545238	1
Pip5k1b	0.237033	4.67299	0.0727985	0.787305	1
Nlrc5	-0.321818	7.29811	0.637025	0.42479	1
Jade3	0.0495984	2.75139	0.00259781	0.95935	1
Camk4	0.0776928	4.40101	0.011119	0.916021	1
Anxa8	0.264886	0.817039	0.0427122	0.836268	1
Sec31a	-0.875557	2.23624	0.638019	0.424429	1
Tmem131l	0.481273	5.58829	1.07763	0.299227	1
Zfp866	-0.233581	4.69758	0.267867	0.604766	1
Phb2	-0.278916	5.73777	0.545753	0.460058	1
Dnm2	-0.525786	6.50096	2.0823	0.149015	1
Ate1	0.297654	4.84382	0.49538	0.481537	1
Metrn	0.544406	2.09786	0.399564	0.527314	1
Zkscan7	-0.136871	2.26353	0.0175981	0.894464	1
Rnf10	0.332081	12.2404	0.132715	0.715634	1
Amigo1	-1.91612	1.55541	2.02484	0.154745	1
Smchd1	-0.0132735	7.47553	0.00120148	0.972349	1
Frrs1	0.515503	3.96895	0.89818	0.34327	1
Rsrc2	0.123946	6.23886	0.082307	0.774195	1
Pex26	0.00794229	1.89792	9.92219e-05	0.992052	1
Mus81	-0.555749	3.22504	0.622859	0.429987	1
Stab1	1.10864	1.81985	0.721471	0.395662	1
Msmo1	0.366936	4.87262	0.376447	0.539511	1
Igip	-0.0450372	2.56202	0.00236241	0.961234	1
Ahnak2	3.60122	1.69146	3.30793	0.0689461	1
Lims1	-0.42373	7.53123	1.1848	0.276382	1
Cep290	0.980243	1.4655	0.884551	0.346958	1
Tmem59	0.42131	6.06796	1.09691	0.294945	1
Alox5	0.143915	5.07352	0.0899593	0.764229	1
Gm5431	-0.815163	4.54731	1.00148	0.316954	1
Atf3	-0.0485709	4.08765	0.00754712	0.930772	1
Tgfbrap1	-0.125123	2.47209	0.0320415	0.857937	1
Zfp146	-0.400808	4.34412	0.656563	0.417776	1
Luzp1	0.0785766	2.81527	0.00922942	0.923465	1
Zmym5	0.230241	5.51962	0.208253	0.64814	1
2700049A03Rik	1.1739	2.88113	1.80443	0.179178	1
Sdhaf1	0.201275	3.66587	0.0565727	0.811997	1
Lemd3	0.336838	3.87557	0.28209	0.595335	1
Clpx	0.18576	4.71069	0.160812	0.68841	1
Ubxn2b	-0.461019	3.4482	0.457015	0.499022	1
Alkbh3	-0.317093	3.58774	0.267703	0.604877	1
Mt1	1.06015	2.73149	0.583639	0.444889	1
Dtwd1	-0.369523	2.16923	0.181255	0.670297	1
Gm45871	1.54335	3.73677	3.43159	0.0639606	1
Mpp7	0.657945	2.30552	0.428245	0.512851	1
Nkiras1	0.566694	3.08237	0.740616	0.389464	1
Gpld1	0	1.31695	0	1	1
Cpsf4	0.252176	3.42168	0.178528	0.672641	1
Edc3	0.0730323	4.32488	0.0262271	0.871347	1
Mylpf	0.046306	2.65616	0.00235083	0.961329	1
Zfp738	0.124274	3.79683	0.0444534	0.833012	1
Dsn1	0.774061	2.75267	0.652792	0.419116	1
mt.Co2	0.908466	2.6443	1.23223	0.266974	1
Clspn	1.68651	2.26914	1.58132	0.208571	1
Armc10	0.102346	5.44402	0.0656849	0.797726	1
Pgls	-0.678157	4.80815	1.63344	0.201228	1
Cenpp	1.11612	2.03419	0.75322	0.385459	1
Pot1a	-0.0877461	4.69847	0.0276081	0.868034	1
Acly	0.0803653	7.34372	0.0504001	0.822369	1
[truncated: 8,781 more rows]

## Sheet: PcAS_Early-Control
SYMBOL	logFC	logCPM	LR	PValue	FDR
Serpina3f	6.0794	5.97174	46.4895	9.2113e-12	9.92978e-08
Cxcl9	9.1734	3.73328	38.091	6.75193e-10	3.63929e-06
Ccrl2	5.89865	4.45227	34.9118	3.44983e-09	1.23964e-05
Gbp2	4.03524	10.3345	32.3202	1.30745e-08	3.52356e-05
Cep55	6.92943	3.27827	30.4629	3.40319e-08	7.33727e-05
Oas1g	4.50131	5.12013	29.8582	4.64825e-08	8.35136e-05
Spon1	6.9717	2.5832	27.1343	1.89805e-07	0.00026388
Gys1	7.24524	1.41134	27.0738	1.95829e-07	0.00026388
Nek2	6.58584	3.39631	25.7966	3.79359e-07	0.000454388
Zfp942	-2.65512	4.30528	25.1968	5.17669e-07	0.000558048
Nuf2	4.94159	3.86265	23.4834	1.25994e-06	0.00122416
Tubb3	6.59375	2.86515	23.3326	1.36271e-06	0.00122416
Zbp1	2.65337	8.3301	22.3669	2.25226e-06	0.00186764
Il12rb1	4.47749	3.04797	22.1618	2.50608e-06	0.00192968
Gbp7	2.38842	7.20916	21.4235	3.68225e-06	0.00264631
Upp1	5.89603	5.76861	21.2909	3.94593e-06	0.00265857
Oasl2	3.20872	9.58329	21.0367	4.5057e-06	0.00269841
Shcbp1	6.58181	3.108	21.0885	4.38557e-06	0.00269841
Ttll5	6.37282	0.635676	20.0547	7.52586e-06	0.00405644
Fbxw17	4.09123	3.34947	20.0571	7.51627e-06	0.00405644
Ifit3b	4.98339	6.52996	19.7341	8.9001e-06	0.00456872
Hspa2	6.10362	0.901631	19.2982	1.11812e-05	0.00547877
Tap1	1.7679	7.48038	18.5954	1.6161e-05	0.00757459
Aatk	5.59174	1.16121	18.3478	1.84035e-05	0.00826623
Tpx2	2.20003	5.27488	18.185	2.0045e-05	0.00831097
H2.T.ps	3.30033	2.66468	18.2427	1.94469e-05	0.00831097
Serpina3g	2.25843	8.00421	17.893	2.33685e-05	0.00901651
Gbp6	2.21438	5.47322	17.8888	2.34195e-05	0.00901651
Atp5g2	1.93233	5.29406	17.4392	2.96649e-05	0.0110272
Oas1a	2.23586	7.18256	17.1335	3.48419e-05	0.0125199
Dhx34	3.21358	2.30599	17.051	3.6389e-05	0.012654
Kif24	7.45786	1.18504	16.8289	4.09063e-05	0.0135573
Kif2c	4.57454	3.32561	16.8014	4.15019e-05	0.0135573
Fam110a	6.77157	0.863689	16.7049	4.36676e-05	0.0138452
Irf7	2.89183	9.14712	16.5718	4.6843e-05	0.0142022
Acox1	-2.83734	5.30637	16.5482	4.74286e-05	0.0142022
Incenp	1.95452	4.7729	16.4937	4.88113e-05	0.0142212
Myo1d	5.15139	2.87685	16.3441	5.28205e-05	0.0149843
AI847159	5.91556	1.17994	16.2574	5.52941e-05	0.0152839
Fads1	-4.53151	3.84197	16.123	5.93577e-05	0.0159969
Tppp3	2.61294	5.59607	15.9637	6.45675e-05	0.0165723
Sgo1	6.1931	2.4874	15.9991	6.33729e-05	0.0165723
Trafd1	2.00227	7.40827	15.876	6.76307e-05	0.0169549
AA467197	5.96528	2.06067	15.7572	7.20141e-05	0.0176435
Gas2l3	5.64845	0.9983	15.6116	7.77744e-05	0.0186313
Ndrg2	-4.0696	4.63838	15.5115	8.20031e-05	0.0192173
Slamf8	2.85054	4.34814	15.2702	9.31756e-05	0.0213709
Casp12	6.61949	1.91014	15.1391	9.98752e-05	0.0224303
Pdcd1	6.70822	3.19011	15.0073	0.000107096	0.0231071
Parpbp	5.19899	2.14062	14.9917	0.000107983	0.0231071
Gm36551	5.51083	1.65874	14.9685	0.000109319	0.0231071
Slc25a19	1.86898	4.41497	14.9173	0.000112329	0.0232867
Gpld1	-8.81472	1.31695	14.7525	0.000122583	0.0236575
Wars	2.19054	5.49878	14.7477	0.000122896	0.0236575
Tex14	6.23234	1.38068	14.8005	0.000119507	0.0236575
Il27	4.50751	1.83512	14.8169	0.000118469	0.0236575
Mill2	5.68096	1.60058	14.4864	0.000141178	0.0260302
Gm4841	5.15156	4.11801	14.4376	0.00014488	0.0260302
Scarf1	4.00739	2.54074	14.5328	0.000137741	0.0260302
Abcd3	-2.77317	4.20612	14.4636	0.000142894	0.0260302
H2.Q10	-3.75122	6.27793	14.2273	0.000162004	0.0281678
Pask	6.2786	1.27503	14.2442	0.000160556	0.0281678
Retsat	-5.17535	2.80586	14.124	0.000171147	0.0292852
Uba7	1.71172	6.89029	13.9633	0.000186416	0.0304773
Iigp1	3.00398	7.30418	14.0154	0.000181322	0.0304773
Ubald2	1.73302	4.89393	13.9615	0.000186596	0.0304773
Endod1	1.86248	5.24965	13.8631	0.000196618	0.0311786
Pkp3	2.08756	5.05834	13.8626	0.000196674	0.0311786
Igtp	1.7314	8.99831	13.8148	0.000201742	0.0315185
Tgtp2	1.99981	9.01547	13.7175	0.000212464	0.0327194
Phyh	-1.8678	5.93705	13.6813	0.000216604	0.0328872
Psmb10	2.016	6.35858	13.655	0.000219661	0.0328881
Gm8730	1.75283	3.96764	13.4902	0.000239816	0.0349353
1810022K09Rik	-1.61637	5.21504	13.5112	0.000237143	0.0349353
C3	-4.09879	7.5513	13.4036	0.000251136	0.0360967
mt.Nd2	-2.50987	6.52748	13.3614	0.00025686	0.0363987
Cdkl3	-2.94623	2.09349	13.3387	0.00025999	0.0363987
Zbtb32	3.96035	3.24226	13.2614	0.000270934	0.0369705
Babam1	1.39021	4.53315	13.2635	0.000270626	0.0369705
Gcdh	-2.53777	4.52647	13.1002	0.000295264	0.0396614
Noc4l	3.32954	2.21329	13.0828	0.000298012	0.0396614
Haus3	-1.93322	4.60066	13.0018	0.000311186	0.0404167
Oas3	2.17612	7.1238	13.0128	0.000309367	0.0404167
Sephs2	-1.46761	6.35983	12.9205	0.000324999	0.0408812
Ptprcap	1.45823	6.0382	12.9545	0.000319157	0.0408812
Miat	7.85035	2.45849	12.9113	0.0003266	0.0408812
mt.Nd1	-2.10803	9.1978	12.8923	0.000329932	0.0408812
Bax	1.66361	4.49278	12.7506	0.00035589	0.0431067
Siva1	2.1122	3.0124	12.7607	0.000353975	0.0431067
Gm12250	2.03812	6.90787	12.6864	0.000368327	0.0441174
Trf	-8.04517	5.09832	12.6345	0.00037869	0.0448602
Irf1	1.73	8.33599	12.4977	0.000407463	0.047744
Cdc25c	5.88301	1.80975	12.3289	0.000446008	0.0503134
Me1	-8.07457	1.38055	12.3383	0.000443749	0.0503134
Gm31718	5.07188	1.15294	12.3203	0.00044806	0.0503134
Trim16	4.7515	1.8975	12.3575	0.000439223	0.0503134
Ube2e1	-1.68079	4.47398	12.2744	0.000459204	0.0510091
Gamt	-6.72958	1.88639	12.2562	0.000463719	0.0510091
Nlrc5	1.43569	7.29811	12.2164	0.000473703	0.051581
Zfpm1	2.86039	2.98187	12.1795	0.000483166	0.0520852
Aicda	6.42228	1.19897	12.0631	0.000514287	0.0548912
Crot	-1.33821	5.80567	11.9638	0.000542427	0.0569307
H2.Q7	1.71462	7.78605	11.9586	0.000543957	0.0569307
Hmgcs2	-12.0749	3.81076	11.8887	0.000564751	0.0581117
Rbm38	2.36403	4.75823	11.8845	0.000566023	0.0581117
Nat8f1	-4.08581	2.10625	11.8246	0.00058452	0.0583438
Fktn	-3.04154	1.82051	11.8391	0.000579986	0.0583438
Mastl	5.06858	1.92301	11.8299	0.000582861	0.0583438
Zdhhc17	-1.80044	3.85073	11.7819	0.000598079	0.0591495
Plscr1	2.2893	4.52333	11.7354	0.000613233	0.0600968
Tlcd2	-6.36379	1.8334	11.6273	0.00064992	0.0631183
Ptges	5.57398	1.8955	11.6061	0.00065735	0.0632699
Ms4a6d	1.70684	6.20998	11.5704	0.000670089	0.0639253
Uhrf1	3.16927	3.54261	11.544	0.000679668	0.0642703
H2.T22	1.65717	8.75518	11.4827	0.000702483	0.0652899
I830127L07Rik	1.64066	6.58399	11.4825	0.000702563	0.0652899
Ifih1	1.63767	6.26594	11.3224	0.000765756	0.0701898
Gm37716	4.87188	1.48017	11.3163	0.000768311	0.0701898
Plec	1.79069	4.56239	11.2896	0.00077942	0.0706063
Spag1	4.35513	1.54071	11.2152	0.000811319	0.0722811
Timm10	1.81135	3.28798	11.2291	0.000805262	0.0722811
Lin28a	5.82055	0.805422	11.1914	0.000821773	0.0726124
Gm28151	-3.28031	1.90055	11.0534	0.000885238	0.0735002
F9	-7.39302	1.80397	11.0932	0.000866454	0.0735002
Tgfb2	-6.63468	0.994684	11.0582	0.000882941	0.0735002
Rpl36	1.98664	6.53919	11.1109	0.000858206	0.0735002
Ptpn1	1.30498	5.89796	11.0672	0.000878698	0.0735002
Dohh	3.21155	1.70553	11.0571	0.000883483	0.0735002
Gm5150	-1.47306	4.69749	11.0511	0.000886366	0.0735002
Klrg1	2.3422	5.79988	11.1119	0.000857759	0.0735002
Bad	1.90265	3.41166	11.0045	0.000908898	0.0739498
Tln1	1.37276	7.03756	10.9975	0.000912367	0.0739498
Usf1	1.3151	5.79254	11.0132	0.000904675	0.0739498
Cenpw	4.23919	2.05983	10.9674	0.000927264	0.0740438
Cfap36	-1.70444	3.86436	10.9689	0.000926545	0.0740438
Decr1	-2.50751	4.3958	10.9429	0.000939606	0.0744776
Efhd2	1.75416	4.89623	10.8992	0.000962077	0.0757022
Spata6	-2.47802	3.9631	10.865	0.000979997	0.0760027
Bcl2a1a	-2.31587	3.72255	10.8721	0.000976236	0.0760027
Nufip1	-1.48139	4.12735	10.8222	0.00100288	0.0767298
N4bp1	1.26411	4.93213	10.8209	0.00100361	0.0767298
Rad51ap1	4.66941	2.63393	10.787	0.00102215	0.0775971
H2.T23	1.32568	8.97146	10.657	0.00109655	0.0779465
Jun	2.13473	3.73239	10.6406	0.00110629	0.0779465
Abca13	6.4648	1.22587	10.7003	0.00107117	0.0779465
Mxd3	4.21196	2.20607	10.6753	0.00108576	0.0779465
Mfsd12	2.90018	2.58697	10.6982	0.00107237	0.0779465
Med16	2.53583	2.3393	10.6758	0.00108548	0.0779465
Opa1	-1.12084	5.23719	10.7595	0.00103748	0.0779465
Lin7c	-1.06164	5.48391	10.6464	0.00110287	0.0779465
Coro1c	1.39886	5.07533	10.6792	0.00108349	0.0779465
Cmip	2.68256	2.44448	10.7167	0.00106176	0.0779465
Tbc1d10b	1.51759	4.47974	10.6948	0.00107436	0.0779465
Slc52a3	5.14928	0.824452	10.6194	0.00111908	0.0783356
Gbp8	1.75417	5.82118	10.5955	0.00113366	0.0788441
Apoh	-13.2652	4.92945	10.563	0.00115375	0.079329
Rfx2	2.48498	3.54444	10.5556	0.00115837	0.079329
Phf11a	2.71713	5.33059	10.5487	0.00116271	0.079329
Znrf3	-4.22571	1.79142	10.5183	0.00118197	0.0796351
Esm1	5.80634	1.61333	10.5237	0.00117852	0.0796351
Klhl25	1.60459	5.2575	10.4287	0.00124071	0.0815541
Mthfd1l	1.47119	4.50988	10.4448	0.00122992	0.0815541
Them4	-3.84704	1.37991	10.4615	0.0012189	0.0815541
Lrrk1	1.56215	4.45454	10.4367	0.00123533	0.0815541
Ly6c2	1.67745	9.31324	10.3915	0.001266	0.0827119
Natd1	3.42629	1.81184	10.3544	0.00129168	0.0838814
Gstz1	-3.64414	4.20221	10.3155	0.00131916	0.0845176
Fbxo8	-1.32207	4.71711	10.3225	0.00131419	0.0845176
Prdx5	1.51132	7.98688	10.3074	0.001325	0.0845176
2700081O15Rik	4.88348	1.84736	10.2792	0.00134539	0.0848274
Fah	-5.11684	3.60477	10.2789	0.00134559	0.0848274
Cit	2.87725	3.81049	10.2585	0.00136056	0.0852724
Socs2	-4.323	1.88582	10.2145	0.00139343	0.0859707
Cenpp	4.9574	2.03419	10.2116	0.00139563	0.0859707
Abcg1	1.19705	5.42023	10.2177	0.00139096	0.0859707
F830016B08Rik	6.7096	1.97847	10.1578	0.0014369	0.0870215
Mlkl	2.36296	3.91711	10.1667	0.00143001	0.0870215
Apoe	-3.64107	8.57035	10.1722	0.00142578	0.0870215
mt.Cytb	-2.09056	9.73913	10.1277	0.00146055	0.0875522
Igkv12.89	5.17855	0.78033	10.1057	0.00147815	0.0875522
Msl3l2	4.79028	0.979737	10.1059	0.00147792	0.0875522
Sqle	-3.0211	3.43157	10.1088	0.00147567	0.0875522
Gm36981	5.88157	0.977955	10.0945	0.00148711	0.0876012
Ascc2	1.56162	4.81623	10.0812	0.00149788	0.0877564
Tspo	1.69595	7.5785	10.0338	0.00153692	0.0895567
Gm4208	5.88163	1.05613	10.0004	0.00156506	0.0907063
Rnf114	1.88479	9.48395	9.98784	0.00157578	0.0908389
Nfs1	1.25258	4.95405	9.88828	0.00166335	0.0953769
Ung	3.24838	1.85186	9.87153	0.00167856	0.0957401
Tgtp1	1.83973	7.31153	9.81062	0.00173507	0.0974172
Sema5a	-5.33803	0.391545	9.80783	0.00173771	0.0974172
Pgrmc1	-1.6913	5.53687	9.80843	0.00173714	0.0974172
Mmel1	5.67975	2.12056	9.80106	0.00174411	0.0974172
Plod3	1.46471	4.94599	9.74726	0.00179591	0.0997931
Nprl3	1.46186	5.02108	9.68495	0.00185784	0.102207
Ddah1	-8.3508	1.10129	9.68448	0.0018583	0.102207
Kremen2	5.14111	1.32718	9.65328	0.00189013	0.10343
Rnase4	-3.56906	4.52153	9.62764	0.00191671	0.104162
Mybpc3	4.59156	0.320904	9.62177	0.00192284	0.104162
Rbck1	1.13464	6.11526	9.60767	0.00193766	0.10444
Rgs14	1.27737	5.0328	9.53604	0.00201476	0.108055
Fermt2	-7.12613	1.44275	9.52093	0.00203141	0.108409
Ifi30	1.12411	7.62469	9.50386	0.0020504	0.108883
Apoa2	-15.1185	6.69715	9.47038	0.00208816	0.109437
Pitpnm1	1.62103	4.40442	9.46764	0.00209128	0.109437
Mcrip2	-5.1553	0.835714	9.48152	0.00207551	0.109437
Gcc2	-1.45441	4.20879	9.4332	0.00213093	0.110472
Neurl1b	4.80307	1.02577	9.43158	0.00213281	0.110472
Coro1b	1.24917	6.82323	9.42385	0.00214181	0.110472
1500009L16Rik	5.40394	2.09057	9.40543	0.00216344	0.110773
Ranbp9	-0.96	6.06227	9.40141	0.00216819	0.110773
Cxcl12	-7.96031	0.861212	9.33052	0.00225368	0.114598
Gbp10	3.79375	3.56736	9.3102	0.00227882	0.114803
Gbp3	1.4823	7.08108	9.30813	0.00228139	0.114803
Bcap29	-2.07437	3.86232	9.30149	0.00228967	0.114803
Irgm1	1.4823	8.25617	9.28205	0.0023141	0.115491
Katnb1	2.37523	2.53383	9.23755	0.00237102	0.117786
Alb	-18.4203	10.2259	9.18154	0.00244468	0.120089
Taf13	-1.3826	4.36304	9.18244	0.00244349	0.120089
Hccs	-1.52258	3.97511	9.17696	0.0024508	0.120089
Psmb9	1.3729	6.86455	9.1651	0.00246674	0.120141
Spic	-2.51419	3.66945	9.15961	0.00247415	0.120141
Zfp365	-6.13077	0.553767	9.14071	0.00249984	0.120844
4930599N23Rik	5.47173	1.43951	9.07205	0.00259546	0.121122
Slc4a8	3.04374	1.85306	9.10624	0.00254739	0.121122
Slc4a2	2.58777	2.33381	9.09525	0.00256275	0.121122
Zfp445	-1.10295	5.8282	9.07216	0.00259531	0.121122
Fcgr4	1.5741	8.03641	9.09823	0.00255858	0.121122
Adh1	-8.79313	5.10205	9.08487	0.00257733	0.121122
Tnfaip2	1.42102	7.02729	9.09973	0.00255647	0.121122
Tfip11	1.7773	3.53409	9.087	0.00257432	0.121122
A330040F15Rik	5.1685	2.49678	9.04398	0.00263562	0.122358
Fam78b	4.329	1.4056	9.03772	0.00264465	0.122358
A930009A15Rik	5.30018	0.769743	9.0034	0.00269478	0.124064
Vrk3	1.04837	5.62057	8.99678	0.00270455	0.124064
Cdk2ap1	1.25079	4.21316	8.98446	0.00272286	0.124331
Cd55	-1.41077	7.05473	8.97737	0.00273343	0.124331
Abhd14b	-3.82883	2.44755	8.96508	0.00275189	0.124644
Cdh17	2.95871	2.43178	8.90767	0.00283976	0.127552
Kyat3	-5.47803	2.5482	8.91033	0.00283561	0.127552
Tmprss13	4.5839	1.93558	8.89339	0.00286204	0.12802
Ifi47	1.44167	8.65465	8.86289	0.00291027	0.128124
Zfp422	-1.79802	3.96459	8.82597	0.00296973	0.128124
Pex13	-1.24565	4.50892	8.82966	0.00296373	0.128124
Gstm1	-3.0005	4.73426	8.85679	0.00292	0.128124
Ncor2	2.58704	1.58574	8.85047	0.00293013	0.128124
Sgo2a	4.62928	2.49477	8.85026	0.00293047	0.128124
Ifi27	1.72954	8.30565	8.82499	0.00297133	0.128124
Sccpdh	3.36765	2.25598	8.82992	0.00296332	0.128124
Fam129b	2.50282	3.63601	8.86796	0.00290219	0.128124
Stra6l	-6.55052	1.37477	8.76475	0.00307107	0.131897
Pank1	-4.46998	2.34336	8.73199	0.00312675	0.133294
Abcc3	-3.01962	2.49459	8.73107	0.00312833	0.133294
Tgm2	1.62936	6.10547	8.71438	0.0031571	0.133624
Tbx21	1.84861	4.70856	8.71221	0.00316086	0.133624
Dbi	-2.11187	5.34118	8.66491	0.00324396	0.1345
Gm26740	-1.97118	2.62563	8.69129	0.00319734	0.1345
Cpd	-1.56407	4.96521	8.68196	0.00321376	0.1345
Ccnt2	-1.06635	5.43282	8.67015	0.00323464	0.1345
Dpt	5.11826	1.74906	8.67746	0.00322171	0.1345
BC051226	2.74742	1.69997	8.58796	0.00338392	0.135162
Myl2	5.41675	2.54515	8.60065	0.00336043	0.135162
Cmc2	2.21276	3.05225	8.53713	0.00347974	0.135162
Fam83d	4.68406	0.619706	8.58467	0.00339005	0.135162
Hadh	-1.95318	3.97074	8.57654	0.00340522	0.135162
Afmid	3.14421	1.47028	8.62208	0.00332112	0.135162
Tapbpl	1.32015	5.34981	8.53405	0.00348563	0.135162
Isyna1	1.69279	4.06364	8.55175	0.0034519	0.135162
Cdc16	-1.14701	5.43973	8.59416	0.00337243	0.135162
Gm11585	3.26857	1.33473	8.54144	0.00347151	0.135162
Gbp4	1.59632	7.17932	8.56458	0.00342766	0.135162
Tctex1d2	-2.50483	2.41021	8.57018	0.00341713	0.135162
Serpina3n	-9.63129	1.98622	8.54966	0.00345587	0.135162
Hells	2.21106	3.85997	8.57636	0.00340555	0.135162
Stard10	-2.50679	4.45746	8.55396	0.00344772	0.135162
Rex1bd	2.1888	3.06824	8.61313	0.00333748	0.135162
Gm16104	4.56358	1.37249	8.58369	0.00339188	0.135162
Spp1	6.01862	2.72201	8.5431	0.00346834	0.135162
Etfa	-1.37138	4.87617	8.50441	0.00354286	0.135955
Ces1d	-5.91873	2.38618	8.50387	0.00354391	0.135955
Gsta4	-5.43494	1.86191	8.50586	0.00354005	0.135955
Jund	1.80829	2.867	8.46519	0.00362006	0.137409
Il18bp	2.36184	5.28773	8.46631	0.00361785	0.137409
Cp	-5.67643	4.92667	8.46809	0.00361431	0.137409
Stil	4.56224	2.09188	8.44629	0.00365789	0.137874
Gon4l	1.37849	3.97841	8.44746	0.00365553	0.137874
Itih4	-12.7072	4.27433	8.4315	0.00368776	0.138516
Smpdl3b	1.87101	6.05047	8.41894	0.00371333	0.138992
Adtrp	-7.52471	0.889734	8.36671	0.00382157	0.142548
Ythdc1	-1.4022	4.69181	8.34836	0.00386035	0.143498
Rabgef1	-1.32298	3.98768	8.30747	0.00394825	0.145899
Spc24	2.18201	4.01809	8.30574	0.003952	0.145899
Arl6ip6	-1.64242	3.22778	8.25074	0.00407354	0.149873
Uri1	-0.973232	4.70993	8.22251	0.0041374	0.151191
Gtf2a2	-1.10082	5.38118	8.22804	0.0041248	0.151191
Usp18	1.84258	7.25145	8.21087	0.00416403	0.151649
Pcyt1b	2.58024	3.15522	8.12277	0.00437127	0.156464
Cd6	1.44109	5.02343	8.12247	0.00437199	0.156464
Dgat2	-2.85999	3.29441	8.13476	0.00434247	0.156464
Fbxo11	-1.31271	4.84594	8.11778	0.00438333	0.156464
Aprt	1.58848	5.17019	8.13282	0.0043471	0.156464
Rtp4	1.5796	6.63459	8.14392	0.00432058	0.156464
Asna1	1.10659	5.8972	8.11074	0.00440039	0.156555
Cdca8	2.65166	3.48027	8.08554	0.00446197	0.157936
Cdt1	2.46543	2.45878	8.0829	0.00446849	0.157936
Tmem189	1.2838	4.75877	8.0676	0.00450637	0.158505
Selplg	1.12637	7.02106	8.06454	0.004514	0.158505
H2.D1	1.34028	11.5845	8.05441	0.0045393	0.158824
E130215H24Rik	3.13533	1.1065	8.04912	0.00455257	0.158824
Strn4	1.3923	4.01961	8.03847	0.00457942	0.159246
Gm5431	2.41337	4.54731	7.99292	0.00469605	0.159562
Baz2b	-1.1238	4.93451	8.01715	0.00463365	0.159562
Pdap1	0.969139	5.21589	7.99911	0.00468002	0.159562
Aldh16a1	1.60112	4.31036	7.98873	0.00470694	0.159562
Spdl1	3.68834	2.36473	7.99195	0.00469858	0.159562
Emilin1	2.82973	2.90683	7.98883	0.00470669	0.159562
Mocs2	-0.924781	4.95269	7.9909	0.00470131	0.159562
Kctd10	0.87333	5.98894	8.02721	0.00460798	0.159562
Trib1	3.20026	2.17922	7.97791	0.00473517	0.160016
Lactb2	-1.59718	3.82405	7.96668	0.00476462	0.160508
Nr2f6	-2.76774	2.12428	7.95801	0.0047875	0.160776
Nr1h2	1.53849	4.20123	7.90477	0.00493045	0.165063
Gm12185	3.04428	4.52379	7.8927	0.00496348	0.165654
Acaa2	-1.61959	5.91459	7.84853	0.00508619	0.169226
Eef2	1.28736	10.2059	7.83393	0.00512745	0.170073
Trappc6a	1.65617	3.58518	7.81707	0.0051755	0.170097
Pln	5.75326	0.812208	7.81918	0.00516947	0.170097
Cmpk2	1.44472	7.02663	7.82198	0.00516146	0.170097
Syne3	2.31461	3.2697	7.79416	0.00524154	0.170983
Ang	-5.35442	2.7982	7.78648	0.00526387	0.170983
Foxm1	4.51274	0.962714	7.78579	0.00526588	0.170983
Unc119b	1.55057	4.97633	7.80059	0.00522291	0.170983
Cdc20b	4.85975	0.719078	7.76278	0.0053334	0.172655
Gm15427	1.49031	3.24401	7.75293	0.00536256	0.173079
AW554918	-4.00471	1.45756	7.71917	0.00546375	0.175818
Fam35a	-1.66762	3.00588	7.67858	0.00558801	0.176137
Cdc42bpa	2.91521	1.46486	7.69266	0.00554458	0.176137
mt.Nd4	-1.88976	8.83484	7.68679	0.00556266	0.176137
Ltf	3.13228	6.68916	7.69129	0.0055488	0.176137
Apoc1	-11.2951	6.07002	7.70866	0.00549564	0.176137
Pvrig	4.56409	0.941204	7.68401	0.00557122	0.176137
Plk3	3.75352	1.94507	7.68302	0.00557427	0.176137
Slc37a1	2.06123	2.6233	7.65939	0.00564776	0.177501
Paip1	-0.890804	5.25827	7.65064	0.00567522	0.177508
Cdc42ep4	1.40425	4.27803	7.64884	0.0056809	0.177508
Ptpa	1.58533	5.95946	7.63732	0.00571728	0.178128
Gcsh	-2.09797	3.80218	7.62043	0.00577107	0.178692
Ogfr	1.09872	6.95887	7.60613	0.00581702	0.178692
Slc16a3	1.69658	5.16342	7.60764	0.00581216	0.178692
Ly6i	2.33716	5.96404	7.60936	0.00580661	0.178692
Ndufc1	-1.62125	4.41062	7.60574	0.00581828	0.178692
Egfr	-7.97476	1.84338	7.54686	0.00601146	0.181394
Psmb8	1.24519	8.53233	7.56303	0.00595778	0.181394
Rplp1	1.39129	8.75721	7.55865	0.00597227	0.181394
Bcat1	4.39462	0.443483	7.5431	0.00602403	0.181394
Psme2	1.04886	8.05169	7.56413	0.00595413	0.181394
Fzr1	2.00698	6.20875	7.54881	0.00600497	0.181394
Glmn	-1.62279	3.31237	7.55298	0.00599109	0.181394
Col18a1	-6.55074	1.89435	7.51971	0.00610276	0.183253
Chic1	-3.04247	1.51296	7.5058	0.00615005	0.18365
Cd200r4	2.34306	3.04012	7.5107	0.00613337	0.18365
Fkbp8	1.38201	7.59497	7.48427	0.00622402	0.183988
Sardh	-4.37343	3.42116	7.48472	0.00622246	0.183988
Rnf26	-2.77109	1.58307	7.48264	0.00622965	0.183988
Dctn3	1.18316	5.08785	7.49557	0.0061851	0.183988
Jmjd1c	-1.08294	5.69978	7.46622	0.00628673	0.185166
Agap2	1.77446	3.83728	7.45772	0.0063165	0.185537
Crip1	1.42959	8.39563	7.45172	0.00633757	0.18565
Serpina1a	-14.1	5.68396	7.43535	0.0063955	0.185832
Slc43a3	1.61706	4.42361	7.439	0.00638255	0.185832
Agpat1	2.32398	1.99749	7.43917	0.00638192	0.185832
Ass1	-2.53858	5.47742	7.42106	0.0064465	0.18681
Tefm	-2.37615	2.39865	7.41423	0.00647099	0.187017
Adi1	-1.84525	3.47576	7.408	0.00649346	0.187165
Wfdc21	-3.25218	5.6051	7.37328	0.00662002	0.187306
Pld2	3.57125	1.24824	7.37619	0.0066093	0.187306
Baiap3	2.08944	4.39114	7.38101	0.00659162	0.187306
Slc25a47	-7.98425	3.03241	7.37815	0.0066021	0.187306
Serpina3k	-15.9487	7.45856	7.37365	0.00661863	0.187306
Igsf8	2.58142	2.34306	7.37996	0.00659548	0.187306
Prickle1	-4.25461	1.31338	7.378	0.00660267	0.187306
Tbcc	2.37986	2.68343	7.36761	0.00664091	0.187406
Ifit1	1.91602	8.90084	7.35434	0.00669012	0.188301
AI837181	1.28977	4.98061	7.33232	0.00677254	0.189631
Slc6a13	-4.70447	2.53343	7.33438	0.00676479	0.189631
Gzmb	2.24804	8.87718	7.32203	0.00681143	0.189952
Gm28437	-1.42534	5.25368	7.31997	0.00681925	0.189952
Nupr1	1.57168	4.79551	7.30819	0.00686412	0.190709
Eml5	-2.33846	2.68272	7.30311	0.00688355	0.190758
Slc2a6	1.39774	5.54278	7.24917	0.00709336	0.191565
Acap3	2.39951	1.82164	7.24744	0.00710023	0.191565
Txndc15	-1.38263	4.31302	7.26409	0.00703469	0.191565
Bak1	1.5018	5.16563	7.26547	0.00702927	0.191565
Ngp	5.11984	4.87515	7.24543	0.00710816	0.191565
Rhou	-3.51765	1.9225	7.24717	0.00710127	0.191565
Tap2	1.29263	5.73565	7.2662	0.00702642	0.191565
Hspa9	-0.897308	6.82601	7.26079	0.00704765	0.191565
Ybey	3.10605	1.34657	7.26158	0.00704452	0.191565
Vps37b	1.5819	3.53795	7.27793	0.0069807	0.191565
Arhgap19	2.50425	2.96564	7.28614	0.00694885	0.191565
Cpsf6	-0.805419	5.4468	7.23191	0.00716188	0.192531
2010315B03Rik	-1.32651	4.37958	7.21957	0.0072113	0.193011
Rpl19	1.02439	9.11186	7.21852	0.00721553	0.193011
Tgif1	-1.04178	4.9751	7.21116	0.00724517	0.193324
Fcor	5.07824	0.454484	7.20653	0.00726386	0.193344
Hmgcs1	-1.4355	4.87136	7.19569	0.00730789	0.19356
Nacad	5.65963	3.19403	7.199	0.00729442	0.19356
Mad2l1bp	1.26651	4.70394	7.18604	0.0073473	0.194127
Mknk2	1.09431	7.07123	7.17737	0.0073829	0.194395
Zdhhc20	-1.03313	6.46929	7.1748	0.00739348	0.194395
Maob	-7.61794	1.66799	7.16416	0.00743745	0.195075
S100a16	-5.94515	1.44828	7.15715	0.00746657	0.195363
Cxcl13	-4.08355	3.97459	7.15278	0.00748477	0.195365
Gna11	1.74377	3.26951	7.13532	0.00755803	0.195855
Lsm4	1.02302	5.09897	7.14277	0.00752669	0.195855
af1	1.3217	7.49893	7.13656	0.00755277	0.195855
Inmt	-9.22802	3.96887	7.12336	0.00760859	0.196692
Rsbn1l	-1.46584	4.86628	7.10837	0.00767247	0.197869
Pgap1	-1.4443	5.31143	7.09192	0.00774321	0.198829
Osbpl1a	-2.55451	3.23306	7.09114	0.00774658	0.198829
Pbld1	-5.58138	1.44122	7.07403	0.00782092	0.199313
Prrc2a	1.58409	2.87315	7.07405	0.00782083	0.199313
Apoa1	-13.6341	5.37113	7.07581	0.00781315	0.199313
Isg15	2.46431	10.7965	7.03858	0.00797724	0.199524
9930012K11Rik	-2.47107	2.21556	7.04731	0.00793842	0.199524
Mcee	-1.49166	3.34166	7.04013	0.00797034	0.199524
Zfp970	-4.25582	1.40192	7.0552	0.00790357	0.199524
Slc7a7	2.31468	3.13257	7.04718	0.007939	0.199524
Ube2g2	1.26919	4.88791	7.03892	0.0079757	0.199524
Zc3h18	1.14756	4.06167	7.0557	0.00790134	0.199524
Serpinf1	-8.8462	2.57489	7.05165	0.00791925	0.199524
Aasdhppt	-1.10197	4.12777	7.00589	0.0081242	0.20004
Ranbp6	-1.62934	4.35171	7.02225	0.0080503	0.20004
Gpatch3	1.62203	2.55681	7.02064	0.00805756	0.20004
Nudt7	-1.72926	3.58458	7.00587	0.00812431	0.20004
Smim10l1	-1.38614	3.87174	7.02412	0.00804189	0.20004
Appbp2	-0.944517	5.05198	7.0051	0.00812777	0.20004
A530032D15Rik	1.89984	3.29254	7.00861	0.00811185	0.20004
Acad11	-1.82209	3.66438	7.00011	0.00815048	0.200142
Traf4	2.16847	2.81642	6.98643	0.008213	0.200912
Tkt	1.10997	7.48775	6.9851	0.00821912	0.200912
Fermt3	1.42147	7.45647	6.97242	0.00827754	0.201882
Trp53inp2	-3.16485	2.25865	6.95123	0.00837616	0.203367
Serpina1c	-14.7222	6.31095	6.95481	0.00835944	0.203367
Gm17344	2.92856	2.69653	6.9414	0.00842231	0.203637
2900026A02Rik	-3.76782	1.43847	6.93284	0.00846273	0.203637
Anxa9	3.00216	1.0024	6.93407	0.00845688	0.203637
Stat3	0.883851	5.90807	6.93281	0.00846284	0.203637
Gvin1	1.82496	6.9701	6.92338	0.0085076	0.204217
Nipsnap1	-1.63328	4.00801	6.91976	0.00852484	0.204217
Igf2bp3	3.75188	1.64756	6.91465	0.00854923	0.204347
Ube3b	1.02829	5.16935	6.90871	0.00857767	0.204574
Eef1akmt1	1.22876	4.07441	6.88667	0.00868407	0.205476
Fam212a	2.25068	2.81056	6.88258	0.00870397	0.205476
Lman2	0.975145	6.37408	6.88117	0.00871083	0.205476
Med12	1.48146	4.36683	6.88894	0.00867309	0.205476
Tnfaip8l2	1.1185	6.24188	6.89387	0.0086492	0.205476
Inpp5f	-1.02446	4.799	6.87203	0.00875551	0.206079
3110043O21Rik	-1.67024	3.35134	6.86663	0.008782	0.20611
Rpl18	1.06973	9.18955	6.86398	0.00879506	0.20611
Ifng	3.18968	2.78992	6.84375	0.00889518	0.206874
Ankrd36	6.20211	4.34168	6.83284	0.00894967	0.206874
Ebag9	-1.44185	3.76002	6.77461	0.00924636	0.206874
Elof1	1.32076	4.75554	6.78426	0.00919653	0.206874
Zkscan8	-2.40469	2.61441	6.81488	0.00904013	0.206874
Fkbp3	-1.10679	6.16544	6.77608	0.00923874	0.206874
Car5b	3.30491	3.32997	6.82986	0.00896465	0.206874
Gtdc1	-1.15748	4.37629	6.82295	0.00899936	0.206874
Cope	1.29493	5.96847	6.83017	0.00896307	0.206874
Rag1	6.43102	5.4339	6.77273	0.00925609	0.206874
Dnajc19	-1.34059	4.36149	6.81328	0.00904825	0.206874
Vcam1	4.16394	1.68068	6.80549	0.00908781	0.206874
Art2a.ps	4.12326	0.367293	6.82142	0.00900711	0.206874
Zfp799	-2.6988	2.30842	6.77273	0.00925613	0.206874
Spin2c	3.9608	0.668745	6.80162	0.0091075	0.206874
Cyba	1.26573	7.83424	6.7996	0.00911781	0.206874
Ccnc	-1.24103	4.15925	6.77477	0.00924556	0.206874
Szt2	1.46424	3.34774	6.7939	0.00914701	0.206874
Rasa4	1.46878	3.87743	6.78327	0.00920162	0.206874
Zfp59	-1.57015	2.92371	6.85145	0.00885693	0.206874
Cyp2e1	-9.95156	4.61875	6.77024	0.00926903	0.206874
Cd200	-1.36516	3.62799	6.82027	0.0090129	0.206874
Nae1	-1.0924	4.8994	6.83552	0.00893626	0.206874
Thg1l	1.4894	3.20253	6.76637	0.00928918	0.206895
Ing1	-0.872493	5.134	6.75057	0.00937175	0.208304
Fbxo34	1.76631	3.75828	6.71621	0.00955403	0.210763
Cdkn2d	0.99353	5.9416	6.71876	0.00954041	0.210763
Fmr1	-1.08353	5.11446	6.70831	0.00959648	0.210763
Ncapd2	1.51508	4.95377	6.71073	0.00958346	0.210763
Gtf2f1	1.12697	5.47122	6.70771	0.0095997	0.210763
Med6	-1.27546	3.59621	6.72081	0.00952942	0.210763
Camk1d	-1.23716	4.67363	6.70041	0.00963906	0.210781
Mttp	-5.69202	1.4167	6.69436	0.00967184	0.210781
Prf1	1.76437	6.35514	6.69901	0.00964665	0.210781
Atp13a2	1.59638	3.79497	6.69182	0.00968565	0.210781
Pstpip1	1.1022	6.41375	6.6889	0.00970148	0.210781
Atg14	1.77954	3.11452	6.6859	0.00971782	0.210781
Gm10521	-4.75014	1.01349	6.68143	0.00974222	0.210886
2010005H15Rik	4.1238	1.60398	6.67742	0.00976416	0.210937
Hgd	-8.91218	2.46733	6.65691	0.00987723	0.212953
Bend6	4.42254	0.849084	6.62636	0.0100481	0.216204
Bphl	-1.80182	3.23311	6.61226	0.0101279	0.217488
Inpp4b	-0.96317	5.36962	6.59614	0.01022	0.218595
Pex11b	1.82479	3.02097	6.59908	0.0102032	0.218595
Olfm1	-2.53246	1.98418	6.57861	0.0103211	0.22032
Gadd45g	2.29829	2.52424	6.56701	0.0103887	0.221323
Alkbh8	-1.36968	3.87462	6.54826	0.0104987	0.221529
Rab5c	0.99008	7.79928	6.55961	0.0104319	0.221529
Fars2	1.26797	5.14453	6.54091	0.0105422	0.221529
Serpina1b	-14.9274	6.47193	6.54447	0.010521	0.221529
Phldb1	3.9399	0.671106	6.54538	0.0105157	0.221529
Aagab	0.874825	6.01505	6.55131	0.0104807	0.221529
Uvssa	-1.51858	3.55683	6.54336	0.0105276	0.221529
Arfgap3	1.33132	4.68385	6.53254	0.0105919	0.222141
Adam15	2.01385	3.61699	6.52373	0.0106445	0.22281
Sp3	-1.09393	6.33669	6.51135	0.0107188	0.223802
Fanca	1.80435	3.58131	6.50894	0.0107333	0.223802
Foxred1	-0.974715	4.96603	6.49283	0.010831	0.223951
Frmd8	1.13533	5.42021	6.49678	0.010807	0.223951
Sil1	-1.57941	2.96632	6.49668	0.0108076	0.223951
Gnmt	-6.97555	3.57676	6.49541	0.0108153	0.223951
Pign	-0.99214	4.38491	6.49064	0.0108444	0.223951
Chpf2	1.36231	3.2638	6.48406	0.0108846	0.224352
Lipo3	-2.07861	2.78877	6.47793	0.0109222	0.224545
Dyrk3	2.82707	4.93251	6.47575	0.0109356	0.224545
6330403K07Rik	3.86342	0.921995	6.45612	0.0110571	0.226177
Rpl29	1.2998	8.39456	6.45926	0.0110376	0.226177
Ttr	-14.8767	6.55688	6.44805	0.0111074	0.226348
Sik1	1.8268	2.98706	6.44945	0.0110987	0.226348
Gm9949	1.72317	3.65349	6.42976	0.0112224	0.227785
Itih3	-11.6847	3.62716	6.42438	0.0112564	0.227785
Ctnnbl1	1.1701	5.13449	6.42343	0.0112625	0.227785
Kmo	-1.27761	5.72602	6.42681	0.011241	0.227785
Hmg20b	1.91454	1.7584	6.41265	0.011331	0.228742
Smim4	2.03779	5.07827	6.36307	0.011652	0.229708
Ndufa11	1.43356	5.68779	6.38024	0.0115398	0.229708
Cops7b	2.27389	2.24816	6.34171	0.0117931	0.229708
Relb	1.12711	4.77551	6.33846	0.0118147	0.229708
Bambi	3.47886	0.842144	6.32234	0.0119226	0.229708
Lig1	1.72083	3.88053	6.32481	0.011906	0.229708
Amdhd2	1.68909	3.68913	6.3889	0.0114836	0.229708
Adipoq	4.43434	1.14374	6.32081	0.0119329	0.229708
Gm49284	-2.1607	1.73662	6.32682	0.0118925	0.229708
Ivns1abp	-0.97978	6.8157	6.35084	0.0117326	0.229708
Opa3	1.2699	4.15185	6.39208	0.0114631	0.229708
Map3k7	-1.10922	5.40545	6.33349	0.0118479	0.229708
Sel1l	-1.02315	4.87872	6.32622	0.0118966	0.229708
Cyp2f2	-7.82157	1.78498	6.33184	0.0118589	0.229708
Rsph10b	-2.79154	2.75603	6.35437	0.0117093	0.229708
Slc25a15	-2.15539	3.49022	6.39639	0.0114353	0.229708
Cdk19	-0.923911	5.76371	6.37221	0.0115921	0.229708
Fasn	-2.58701	3.73826	6.38527	0.0115071	0.229708
Aunip	4.12485	1.294	6.38553	0.0115054	0.229708
Trim5	-1.06542	5.25726	6.37457	0.0115767	0.229708
Hmox1	2.04429	4.88762	6.3479	0.011752	0.229708
lr4b	-1.37248	3.83533	6.35046	0.0117351	0.229708
Atrx	-1.05079	5.67146	6.36955	0.0116095	0.229708
Klra5	-3.89341	0.906375	6.35771	0.0116872	0.229708
Sec63	-0.896117	5.47333	6.36507	0.0116389	0.229708
Oas2	2.37593	4.86518	6.36994	0.0116069	0.229708
Poldip2	-1.14186	4.5032	6.31395	0.0119791	0.230187
Chit1	4.2881	0.948343	6.31074	0.0120009	0.230194
Gbp5	2.26947	5.71325	6.30335	0.012051	0.230336
Parva	-6.38222	1.26564	6.30353	0.0120498	0.230336
Gmds	2.86226	2.30046	6.29776	0.0120891	0.230655
Lgals3bp	1.21579	5.16866	6.29039	0.0121395	0.231124
Strip2	-5.17229	0.590385	6.2879	0.0121565	0.231124
Abcb10	1.52657	5.1883	6.2805	0.0122073	0.231194
Vnn1	-9.12315	1.43931	6.27801	0.0122245	0.231194
Ube2d1	-2.44179	1.16924	6.28108	0.0122034	0.231194
Crispld2	2.996	4.0302	6.25571	0.0123794	0.232897
Metrnl	1.27996	4.86124	6.24812	0.0124325	0.232897
Tmem245	-1.25251	4.39462	6.24432	0.0124593	0.232897
Sppl2b	1.81102	3.32994	6.24716	0.0124392	0.232897
Ccdc93	-0.944391	4.7437	6.23612	0.0125171	0.232897
Bckdk	1.20613	4.4021	6.23701	0.0125107	0.232897
Rplp2	1.42259	8.0171	6.24356	0.0124646	0.232897
Eml2	1.52912	3.0161	6.26118	0.0123412	0.232897
Serpinb6b	1.63306	6.61357	6.2381	0.0125031	0.232897
Ctdsp2	0.950212	5.02895	6.23419	0.0125307	0.232897
Hcls1	0.955314	7.74327	6.22168	0.0126195	0.234146
Decr2	-2.55796	2.96314	6.21452	0.0126707	0.234288
Tjap1	2.974	0.665285	6.21605	0.0126597	0.234288
Fitm2	-2.71114	2.01082	6.20708	0.012724	0.23463
Kif15	2.34879	3.65523	6.20587	0.0127327	0.23463
Papss2	-2.68691	3.01458	6.19551	0.0128075	0.235041
Mpnd	1.23867	4.93085	6.19834	0.012787	0.235041
Tmem42	1.83635	1.93502	6.19372	0.0128204	0.235041
Commd8	-0.913949	5.70563	6.18104	0.0129126	0.235467
Gm26917	2.67968	1.57411	6.1783	0.0129326	0.235467
Cyp2a5	-10.1664	2.054	6.16661	0.0130184	0.235467
Abca7	1.07396	5.77788	6.17066	0.0129886	0.235467
Renbp	-2.50913	2.63537	6.16889	0.0130016	0.235467
Gpt2	-4.34087	1.7318	6.16769	0.0130104	0.235467
Map3k11	1.55361	3.47567	6.17522	0.0129552	0.235467
Thrsp	-7.62515	2.96641	6.17641	0.0129464	0.235467
Pacs2	1.05339	3.97418	6.16316	0.0130438	0.235531
Pkm	1.15832	8.33808	6.15863	0.0130772	0.23574
Gm4070	1.7822	6.51836	6.14672	0.0131656	0.235756
2009-09-01	0.975887	6.2105	6.15295	0.0131193	0.235756
Pdcd11	1.29318	3.5605	6.14931	0.0131464	0.235756
Aldh4a1	-2.30213	2.99402	6.15102	0.0131336	0.235756
Zfp426	-1.26093	4.8925	6.1381	0.0132299	0.236123
Sertad2	1.34502	5.09928	6.13934	0.0132206	0.236123
Fabp1	-14.7041	6.2813	6.13068	0.0132856	0.236725
Ftx	-1.59437	3.04007	6.12616	0.0133196	0.236939
Ephx2	-8.2591	3.47685	6.11253	0.0134227	0.238379
Mtmr2	-1.15152	5.07992	6.10938	0.0134466	0.238412
Hk3	1.37886	4.91947	6.09661	0.0135441	0.239354
Igf1	-9.45441	3.64573	6.09778	0.0135352	0.239354
Dnaaf2	-3.15011	1.35215	6.06373	0.0137986	0.239531
Mafk	1.19407	5.63233	6.06521	0.013787	0.239531
Aldh7a1	-3.024	3.51557	6.08989	0.0135958	0.239531
Sart1	1.00262	5.27116	6.07471	0.0137131	0.239531
Mafg	1.02114	4.70447	6.06382	0.0137979	0.239531
Gfra1	-4.99746	1.25191	6.06395	0.0137969	0.239531
Ap1b1	0.859039	5.481	6.0727	0.0137287	0.239531
Capn10	1.95888	2.37959	6.06922	0.0137557	0.239531
Pemt	-6.27853	2.60974	6.07125	0.01374	0.239531
Aktip	-1.16676	3.55608	6.07576	0.0137049	0.239531
Tmem97	-2.40814	2.80386	6.0724	0.013731	0.239531
Foxj3	-1.47565	3.72271	6.06086	0.013821	0.239535
Necap2	1.13256	6.63658	6.05596	0.0138595	0.239815
G6pdx	0.80502	6.69178	6.05137	0.0138955	0.240054
Eif1ax	-0.913628	5.84183	6.04016	0.013984	0.240427
Ralgps1	-2.21173	2.36155	6.04167	0.0139721	0.240427
Socs4	-0.94658	4.53858	6.04127	0.0139752	0.240427
Washc4	-0.883141	5.6154	6.02971	0.014067	0.241469
Ighv1.9	3.01175	2.1431	6.00878	0.0142349	0.242654
Hook3	-1.12447	4.89485	6.01051	0.0142209	0.242654
Ambp	-11.4933	4.92312	6.00708	0.0142486	0.242654
Inpp4a	1.57687	3.00188	6.018	0.0141607	0.242654
Csnk1g2	1.13661	5.72478	6.00897	0.0142334	0.242654
Adcy9	3.18318	1.06649	5.99942	0.0143106	0.243325
Gnb2	1.17408	5.80514	5.9951	0.0143457	0.243538
Flii	0.862316	5.9394	5.9789	0.0144781	0.245013
Usp10	-1.56613	3.19269	5.98038	0.0144659	0.245013
Pclaf	2.22707	5.26408	5.97065	0.0145459	0.245602
Sbno2	1.34153	5.04299	5.96816	0.0145664	0.245602
Mcm5	1.70458	5.85328	5.96638	0.0145812	0.245602
Mpp6	-1.29451	4.51067	5.9603	0.0146315	0.246065
Ppp1r15a	2.26542	7.64373	5.95265	0.0146952	0.246751
Ogn	-5.54441	1.71105	5.94482	0.0147606	0.246976
Gm6637	2.91133	3.11033	5.94282	0.0147773	0.246976
Gria3	-4.04149	0.791402	5.94421	0.0147657	0.246976
Gm18852	2.73074	3.13029	5.93867	0.0148122	0.247158
Fam214a	-1.10837	4.44378	5.93607	0.0148341	0.247158
Arf5	1.87714	6.30593	5.92502	0.0149274	0.247901
Gm15675	-1.13931	5.94435	5.92263	0.0149477	0.247901
Gm42141	-3.06541	1.34702	5.9242	0.0149343	0.247901
Gm10925	-1.40272	3.98419	5.91323	0.0150276	0.248843
Ankrd40	1.04778	4.69623	5.90812	0.0150712	0.249184
Armcx1	2.81692	1.64699	5.89676	0.0151687	0.250331
Tmem64	-1.01814	5.0427	5.89464	0.015187	0.250331
Immp2l	-2.05388	1.93891	5.88972	0.0152295	0.25048
Med13l	-1.73528	3.29146	5.88821	0.0152425	0.25048
Cdc37	0.886726	5.81138	5.87521	0.0153555	0.250807
Ints6l	-1.12386	5.37478	5.88152	0.0153006	0.250807
Lfng	1.09355	6.33634	5.8762	0.0153469	0.250807
Adora2b	-2.43545	2.2174	5.87684	0.0153413	0.250807
Aga	-1.44724	3.33069	5.87195	0.015384	0.250891
Mif	1.47691	4.32371	5.83942	0.015671	0.251727
Rxrb	1.08532	4.73804	5.86065	0.0154831	0.251727
D17Wsu92e	1.21299	7.76127	5.84634	0.0156095	0.251727
Hacd3	-1.01459	5.41154	5.86154	0.0154752	0.251727
Phip	-1.07602	6.36108	5.83571	0.015704	0.251727
Cxcr6	1.65532	5.29354	5.84173	0.0156504	0.251727
Pef1	1.11698	5.07373	5.84828	0.0155923	0.251727
Lmna	1.66193	4.76013	5.85414	0.0155404	0.251727
Arglu1	-0.96701	6.51412	5.84128	0.0156544	0.251727
Bcl3	2.89697	0.838131	5.85038	0.0155737	0.251727
Spata1	-2.41384	2.12758	5.856	0.015524	0.251727
Acat1	-0.972777	5.88174	5.83444	0.0157154	0.251727
Ddx24	0.859927	6.50229	5.82855	0.0157681	0.251743
Zfp709	-1.30188	3.84919	5.82779	0.0157749	0.251743
Ptgfrn	-2.7114	1.92547	5.8265	0.0157865	0.251743
G0s2	2.09997	2.05285	5.82325	0.0158157	0.251836
Il5ra	-1.43978	4.18037	5.81714	0.0158707	0.25234
Erh	-0.963736	4.98331	5.81165	0.0159203	0.252427
Fxyd1	-6.61003	1.83295	5.81135	0.015923	0.252427
Samhd1	0.987912	9.38907	5.80373	0.0159922	0.253151
Phf11b	1.22369	7.38655	5.79263	0.0160935	0.254326
Maz	1.03901	4.95565	5.77018	0.0163004	0.254326
Ttpa	-9.64466	2.97558	5.78019	0.0162078	0.254326
Elmod2	-1.40896	4.02625	5.7702	0.0163002	0.254326
Arid4b	-1.37881	5.05347	5.78855	0.0161308	0.254326
Prc1	2.13957	4.37955	5.76997	0.0163023	0.254326
Fancd2	1.79295	3.54672	5.77708	0.0162365	0.254326
Rpl28	1.06504	9.11599	5.77695	0.0162377	0.254326
Timm9	-1.31759	3.38214	5.77274	0.0162766	0.254326
Gpr174	-1.27727	4.97259	5.77551	0.016251	0.254326
Ighg3	3.15048	2.5589	5.76531	0.0163456	0.254633
Hint3	-1.42799	3.72437	5.75296	0.0164609	0.256058
Ube2cbp	-2.83053	1.23771	5.74577	0.0165284	0.256739
Uba3	-0.968258	5.23981	5.73906	0.0165917	0.25735
Arpc5l	-0.857912	6.73031	5.73289	0.01665	0.257884
Ssbp4	1.90789	2.77977	5.72288	0.0167452	0.258378
Pck1	-6.89245	2.94117	5.72198	0.0167538	0.258378
Osbpl3	1.45724	4.48783	5.72345	0.0167398	0.258378
Aurkb	2.27136	3.6947	5.70382	0.016928	0.258476
Cetn3	-1.22639	4.87505	5.70495	0.0169171	0.258476
2510046G10Rik	-2.25633	1.27675	5.7058	0.0169089	0.258476
B9d2	1.69447	2.71528	5.71369	0.0168331	0.258476
Wdr92	-1.20463	3.95246	5.70949	0.0168734	0.258476
Zfp760	-1.70748	3.20599	5.70467	0.0169198	0.258476
Mrps18b	1.72578	2.88166	5.71136	0.0168555	0.258476
Rpusd1	3.78972	0.865362	5.69712	0.0169927	0.259097
Vwa8	-1.67613	3.47854	5.68281	0.0171319	0.259141
Gcn1l1	1.41308	3.83728	5.68614	0.0170994	0.259141
Ifi44	2.2012	5.49141	5.68169	0.0171429	0.259141
Cc2d1a	1.81185	2.76596	5.67954	0.0171639	0.259141
Itm2c	1.06978	5.4195	5.68614	0.0170995	0.259141
Qdpr	-1.43033	4.63224	5.6829	0.0171311	0.259141
St8sia4	-1.04807	6.0802	5.69063	0.0170557	0.259141
Ddx39	0.855998	6.18257	5.67555	0.0172029	0.259367
Cxcl2	3.94374	0.480455	5.66915	0.0172658	0.259952
Osm	2.4857	2.93648	5.66567	0.0173001	0.259998
Grhpr	-2.98815	2.28335	5.66394	0.0173171	0.259998
Gm5970	4.1273	0.551845	5.65357	0.0174199	0.260814
Rpl37rt	1.28442	3.19764	5.65447	0.0174109	0.260814
Prcc	1.74442	2.50908	5.65061	0.0174493	0.260892
Ccdc88b	1.37511	5.3484	5.62871	0.0176686	0.261477
Hspa1a	3.75621	0.95339	5.60559	0.0179033	0.261477
Nkain4	4.05773	1.14449	5.6069	0.0178899	0.261477
Orm1	-9.99469	4.5927	5.60901	0.0178684	0.261477
Gstk1	-2.33238	2.83637	5.62718	0.0176841	0.261477
Pcmtd2	-1.11125	5.47368	5.60363	0.0179233	0.261477
Metrn	2.21528	2.09786	5.59873	0.0179735	0.261477
Myo1b	-4.44023	0.825887	5.60466	0.0179128	0.261477
Klf9	-2.53634	2.70708	5.61451	0.0178124	0.261477
Ppp2r3d	2.8731	1.0847	5.63798	0.0175754	0.261477
Coq8a	-1.2147	3.78622	5.59979	0.0179626	0.261477
Ddx25	-3.61055	1.11679	5.60562	0.0179029	0.261477
Dtx1	1.45144	4.37836	5.63298	0.0176257	0.261477
Pcf11	-0.906054	5.84029	5.64231	0.0175321	0.261477
Junb	1.94706	3.98214	5.62954	0.0176603	0.261477
Emc2	-1.11638	5.70765	5.60322	0.0179275	0.261477
Gm16638	-3.04133	1.53471	5.63301	0.0176253	0.261477
Arpc1b	1.06663	8.50729	5.60069	0.0179534	0.261477
Fdft1	-1.40276	4.61165	5.61749	0.0177821	0.261477
Sh3glb2	1.12096	4.31537	5.60847	0.0178739	0.261477
Rplp0	1.11439	11.7742	5.58153	0.0181509	0.263079
Gpnmb	3.7334	0.751863	5.58095	0.0181568	0.263079
Sh3pxd2a	-2.33061	2.06122	5.5812	0.0181542	0.263079
Atp6v1f	1.06042	5.40436	5.56442	0.0183291	0.265062
Adcy6	1.85102	3.0711	5.56311	0.0183428	0.265062
Snapc1	-1.32714	3.63277	5.55539	0.0184239	0.265877
Gm15931	1.76609	3.93168	5.55038	0.0184767	0.266282
Prkd3	-0.944988	6.38671	5.54586	0.0185245	0.2663
Parp10	1.21402	5.903	5.54559	0.0185274	0.2663
Rasal1	2.36956	1.30539	5.53193	0.0186725	0.266547
1110002L01Rik	-1.65449	3.43128	5.52904	0.0187033	0.266547
Cnpy3	0.881173	5.35256	5.52079	0.0187918	0.266547
Ddt	-3.39583	1.67959	5.5288	0.018706	0.266547
Cdca3	1.4048	4.91451	5.52974	0.0186958	0.266547
Enpp2	-6.48868	2.50388	5.52372	0.0187603	0.266547
Rpa2	1.14637	5.5374	5.52313	0.0187667	0.266547
Cyp4v3	-1.56336	3.93828	5.5278	0.0187166	0.266547
Mrpl51	-1.06223	5.22266	5.53519	0.0186378	0.266547
Ccl27a	-3.56684	0.566485	5.5227	0.0187712	0.266547
Tle3	0.87806	4.80672	5.51613	0.0188419	0.266907
Borcs8	1.27326	4.56399	5.50882	0.0189208	0.267673
Znfx1	1.04043	6.46599	5.50268	0.0189874	0.268262
Cnnm4	2.07012	2.56896	5.49319	0.0190906	0.269368
Iglj1	-2.72417	1.59733	5.49051	0.01912	0.26943
Tubb2a	1.34346	7.75327	5.48232	0.0192097	0.269988
mt.Nd5	-1.58884	6.30237	5.4835	0.0191968	0.269988
Rarres2	-7.21513	4.16249	5.47904	0.0192458	0.270143
Mup3	-14.6871	6.11769	5.47373	0.0193044	0.270261
Pgs1	0.95292	5.52754	5.47503	0.0192901	0.270261
Sapcd2	3.65066	1.25756	5.46948	0.0193514	0.270299
Tnf	-2.27017	2.75113	5.46867	0.0193603	0.270299
Use1	0.862732	6.59771	5.46669	0.0193823	0.270299
Ticrr	3.36744	0.64812	5.46427	0.0194092	0.270324
Manea	-1.04822	4.19534	5.4612	0.0194433	0.27045
Polr1b	-0.917195	4.116	5.45643	0.0194965	0.27084
Oas1b	1.45462	3.75329	5.44506	0.0196237	0.272168
Ar	-2.86468	1.25856	5.44114	0.0196678	0.272168
Sh3bp5l	1.22873	3.92704	5.4414	0.0196649	0.272168
Dctn1	1.12015	4.17626	5.43733	0.0197108	0.272413
Podnl1	3.74772	2.66378	5.434	0.0197484	0.272583
Ugp2	-0.803818	6.13992	5.41959	0.019912	0.27449
Cpsf7	-1.10424	5.03968	5.37464	0.0204316	0.274626
Hal	-3.75698	3.42251	5.37113	0.0204728	0.274626
Cryz	-2.7412	1.58981	5.37112	0.0204728	0.274626
Gm45871	-1.95232	3.73677	5.40406	0.0200899	0.274626
Sc5d	-1.19775	4.88732	5.40343	0.0200972	0.274626
Sidt2	0.808817	6.02454	5.38923	0.0202614	0.274626
Gnl1	1.12616	4.30051	5.39237	0.020225	0.274626
Mrpl13	-1.09717	4.83128	5.37669	0.0204075	0.274626
Aldh1a7	-4.65753	2.51211	5.39035	0.0202484	0.274626
Dnmt3b	-2.06835	1.8938	5.38116	0.0203554	0.274626
Gm30211	-2.31758	2.20577	5.39137	0.0202366	0.274626
Ifrd2	1.67755	5.89343	5.40855	0.0200383	0.274626
Serinc5	-1.08028	4.51488	5.3848	0.020313	0.274626
Edc4	1.2393	4.08646	5.41151	0.0200044	0.274626
Zdhhc2	3.57819	2.02019	5.3976	0.0201645	0.274626
Dnajc30	-2.39242	1.35012	5.41164	0.0200029	0.274626
Trip11	-1.24645	4.09093	5.38054	0.0203626	0.274626
Cdc73	-1.10896	4.32771	5.3719	0.0204636	0.274626
Kcnn4	1.02647	4.89094	5.3937	0.0202095	0.274626
Zfp125	-2.51613	2.51179	5.37031	0.0204823	0.274626
Atp11c	-1.04348	4.7852	5.41209	0.0199977	0.274626
Sec14l1	1.33518	4.43534	5.37625	0.0204127	0.274626
Tigd5	-3.88834	0.429884	5.36489	0.0205461	0.274797
Ifi204	1.13911	8.05802	5.36513	0.0205433	0.274797
Lipe	1.55156	3.52481	5.36185	0.0205819	0.274935
Rock1	-0.867701	6.39933	5.3574	0.0206346	0.274957
Slc35c2	1.19826	4.49065	5.35785	0.0206292	0.274957
Car3	-6.0142	4.55668	5.34944	0.0207289	0.275873
Rsbn1	-1.15071	4.7715	5.34413	0.0207922	0.276374
Smim5	-2.16116	1.59921	5.34042	0.0208364	0.276621
Myl12a	0.738527	7.82942	5.32905	0.0209728	0.277534
Gatm	3.80526	1.38775	5.32825	0.0209824	0.277534
Map10	-2.48577	1.80282	5.32922	0.0209708	0.277534
Igfbp7	-3.98673	2.74797	5.32156	0.0210631	0.27792
Unc13d	1.21561	6.14284	5.32358	0.0210388	0.27792
Myo1f	0.948293	7.15885	5.30678	0.0212426	0.279946
Glrx	1.41773	5.18407	5.30203	0.0213006	0.280367
Hc	-10.0151	3.68078	5.29322	0.0214086	0.281276
Ccr5	1.55284	4.69681	5.29214	0.0214219	0.281276
Snx7	3.18644	0.895149	5.28822	0.0214701	0.281567
Cop1	-0.770461	5.93335	5.27023	0.0216931	0.28243
Pole4	-0.861111	5.52753	5.27264	0.0216631	0.28243
Fam26f	1.49083	4.46511	5.27843	0.0215912	0.28243
Asb6	2.00819	2.79372	5.275	0.0216337	0.28243
Nfyb	-0.98148	4.98922	5.27454	0.0216395	0.28243
Slc8a1	2.768	1.7121	5.2721	0.0216699	0.28243
Adarb1	-3.00661	1.15665	5.26501	0.0217583	0.282596
Gc	-14.8068	6.69067	5.2659	0.0217471	0.282596
Abhd18	-1.41991	3.10961	5.24828	0.0219684	0.28482
Ttpal	-0.75777	6.30895	5.24718	0.0219824	0.28482
Traf7	0.763705	5.6101	5.24497	0.0220103	0.284839
Gpr137	1.45208	2.92223	5.23914	0.0220842	0.285111
Siglech	-2.43879	2.70565	5.24085	0.0220625	0.285111
Spred1	-1.75433	3.84556	5.23149	0.0221815	0.285741
Srsf2	-0.800934	6.62735	5.23114	0.022186	0.285741
Ipo8	-0.859395	4.63871	5.2252	0.0222619	0.286173
Ppp2r1b	1.03519	4.72387	5.22436	0.0222726	0.286173
Pop1	1.75333	2.71957	5.21756	0.0223599	0.286952
Hpx	-14.2952	6.55213	5.2139	0.022407	0.287214
Tfb2m	-1.17382	3.85716	5.21043	0.0224517	0.287446
Impact	-1.0862	3.83371	5.20466	0.0225265	0.288061
Jak3	2.03849	3.09466	5.19939	0.0225949	0.288593
Igfbp2	-10.5343	2.46038	5.19423	0.022662	0.288767
Gm45705	3.20198	1.82733	5.19622	0.022636	0.288767
Chpt1	-1.81639	3.77867	5.18282	0.0228113	0.289427
Cox15	-1.20522	3.51887	5.18331	0.0228049	0.289427
Cyp51	-1.12393	4.99024	5.18206	0.0228213	0.289427
Mvp	1.19125	5.90271	5.18255	0.0228148	0.289427
Apoa5	-11.8024	3.49018	5.17633	0.0228966	0.289701
Cdo1	-6.41165	4.13822	5.17832	0.0228704	0.289701
Myo9a	-1.25149	3.32212	5.16609	0.023032	0.291072
Olfr56	2.05892	3.47033	5.1619	0.0230877	0.291272
Ccl2	-3.05544	1.20029	5.16083	0.0231019	0.291272
Snrnp48	-1.14092	4.56109	5.15518	0.0231772	0.291781
Pigq	1.3217	6.49017	5.15208	0.0232185	0.291781
Ighg2c	4.87289	5.6033	5.15172	0.0232234	0.291781
Vwa5a	1.13756	6.82754	5.13579	0.0234374	0.294127
Pus10	-1.30341	4.17575	5.12415	0.0235951	0.294734
Kif4	2.52202	3.9287	5.11509	0.0237186	0.294734
po7	2.16399	9.81585	5.11569	0.0237105	0.294734
Aldob	-14.2758	5.99255	5.11561	0.0237115	0.294734
St3gal2	1.6322	4.71839	5.1139	0.0237349	0.294734
Hps1	1.43593	3.92081	5.11256	0.0237533	0.294734
Trmt10a	1.84433	2.49837	5.11013	0.0237865	0.294734
Ccnb1	2.15863	4.54424	5.11134	0.02377	0.294734
Urod	2.18165	8.76639	5.12992	0.0235168	0.294734
Stat2	1.28481	6.07994	5.11939	0.0236599	0.294734
Zfp595	-1.44951	3.65081	5.11717	0.0236902	0.294734
Dnttip1	1.09444	5.07866	5.10395	0.0238714	0.295446
Ctsg	3.73586	0.733851	5.10103	0.0239116	0.295605
Cep57l1	-1.92654	3.117	5.09679	0.0239701	0.295731
Slc36a3os	2.82603	1.92431	5.09617	0.0239788	0.295731
Il4ra	0.797866	6.65501	5.09433	0.0240042	0.295731
Rabac1	0.99333	5.61892	5.06222	0.0244529	0.295841
Wwp2	1.06938	6.79965	5.06405	0.0244271	0.295841
Hltf	-0.907398	5.71539	5.08813	0.0240901	0.295841
Msmo1	-1.36011	4.87262	5.05858	0.0245043	0.295841
Naxd	-1.24964	4.60631	5.06508	0.0244126	0.295841
Slc22a15	-2.18441	2.60859	5.08175	0.0241789	0.295841
Sacm1l	-0.81321	5.69473	5.08439	0.0241422	0.295841
Mat1a	-13.1389	4.92584	5.05838	0.0245071	0.295841
Brip1	2.38689	2.8059	5.07483	0.0242757	0.295841
Insig1	-0.9802	4.73332	5.07322	0.0242982	0.295841
Zfp868	-1.0374	4.19282	5.06605	0.024399	0.295841
Spsb3	1.02071	5.52651	5.08491	0.024135	0.295841
Myo18a	0.893905	4.65336	5.06174	0.0244597	0.295841
Suv39h1	1.17331	3.66004	5.07508	0.0242722	0.295841
Mob4	-0.745058	5.47263	5.08338	0.0241563	0.295841
Avl9	-0.846605	5.15166	5.07605	0.0242586	0.295841
Mki67	1.35089	7.9909	5.06362	0.0244332	0.295841
9230116N13Rik	-2.20934	1.35677	5.08	0.0242033	0.295841
Aamp	0.837068	5.58052	5.04578	0.0246861	0.29613
Serping1	-5.69504	4.4087	5.04975	0.0246295	0.29613
Hspb8	-5.28986	2.03114	5.04599	0.024683	0.29613
Aplf	1.32869	3.60413	5.05296	0.0245839	0.29613
Hsp90ab1	0.887536	7.84283	5.04509	0.0246958	0.29613
Tbxa2r	2.50519	2.2083	5.05016	0.0246237	0.29613
Mthfs	-2.42905	2.06416	5.04273	0.0247295	0.296205
Tcta	-1.25682	4.82339	5.03619	0.024823	0.296867
Sp140	0.858025	7.54665	5.03118	0.024895	0.296867
Dlg3	-3.30449	1.45434	5.03492	0.0248413	0.296867
Mtmr14	0.841624	5.83483	5.03223	0.0248799	0.296867
Akt2	0.869627	7.20229	5.02595	0.0249702	0.297435
Tmcc3	-2.27839	2.51637	5.02069	0.0250462	0.297683
Retn	-3.95398	0.781793	5.02155	0.0250337	0.297683
Atxn7	-1.19133	4.08782	5.01245	0.0251656	0.298773
Zswim8	1.41283	3.19808	5.00986	0.0252033	0.298807
Akr1e1	-1.84779	2.98146	4.99909	0.0253607	0.298807
Tcrg.C2	-2.37061	2.92873	5.00564	0.0252649	0.298807
4933417E11Rik	-3.86306	0.295958	4.9964	0.0254001	0.298807
Tpst2	1.02769	5.17194	4.99518	0.025418	0.298807
Gm2000	1.40859	2.97205	5.00204	0.0253175	0.298807
Hnrnph1	-0.878174	6.33532	4.99684	0.0253936	0.298807
Ifitm3	1.0255	8.69705	4.99675	0.0253949	0.298807
Alg11	1.38039	3.46823	4.99925	0.0253583	0.298807
Yae1d1	-2.53707	2.43412	4.98702	0.0255381	0.299892
Ddit4	1.54815	4.17786	4.97558	0.0257076	0.301554
Gm42047	4.18107	1.56872	4.97052	0.0257829	0.302108
Jkamp	-1.29001	4.144	4.96278	0.0258985	0.303133
Nr1d2	-1.23026	4.32685	4.96019	0.0259373	0.303259
Ccnf	3.12402	2.25415	4.94594	0.026152	0.303413
Upf3a	0.922139	4.70103	4.94678	0.0261393	0.303413
Plcl1	-3.24771	1.1823	4.94664	0.0261414	0.303413
Zbtb38	-1.53288	4.2988	4.93916	0.0262547	0.303413
Wasl	-1.27634	3.21497	4.94218	0.026209	0.303413
Myom1	2.63583	2.11284	4.95182	0.0260632	0.303413
Tnfrsf4	2.28584	3.04979	4.94072	0.0262311	0.303413
Ppm1k	-1.16221	4.63366	4.94375	0.0261851	0.303413
Zer1	1.4052	3.08959	4.93881	0.0262601	0.303413
Bbc3	2.32512	1.23689	4.95473	0.0260193	0.303413
Sh3pxd2b	4.10573	1.26554	4.93966	0.0262472	0.303413
Rnf41	1.34557	3.9178	4.9315	0.0263714	0.30343
Hlcs	-1.27729	3.58678	4.93443	0.0263267	0.30343
Polr3f	-0.91716	4.14075	4.92947	0.0264024	0.30343
Cep72	-1.65624	2.97438	4.93654	0.0262946	0.30343
Snrpe	-0.944085	6.33957	4.93038	0.0263885	0.30343
Fbxo6	1.20666	4.52569	4.92525	0.026467	0.303525
Phc2	0.936415	5.19113	4.92555	0.0264623	0.303525
Acoxl	3.13496	1.082	4.92156	0.0265235	0.303564
Epb41l4b	-5.07436	1.0876	4.92136	0.0265266	0.303564
Uap1l1	1.20781	3.77707	4.90626	0.0267595	0.304884
BC028528	-1.14217	4.69673	4.90477	0.0267825	0.304884
Plpbp	-0.817627	5.12869	4.90035	0.0268513	0.304884
Tubg1	1.31948	3.64256	4.90165	0.0268311	0.304884
Dnttip2	-0.756915	5.58498	4.90454	0.0267862	0.304884
Purb	-0.801694	6.6694	4.8977	0.0268925	0.304884
Ffar2	2.59609	2.6887	4.90046	0.0268495	0.304884
2002-03-01	-0.818647	5.70869	4.89744	0.0268966	0.304884
Pold4	0.947752	5.74934	4.90752	0.0267399	0.304884
Tor4a	0.737894	5.9713	4.89173	0.0269856	0.305572
Etfrf1	-1.1183	3.90736	4.88307	0.0271213	0.306495
Irf9	0.797529	6.92985	4.88291	0.0271239	0.306495
Rpl38.ps2	1.22572	5.64656	4.87498	0.0272487	0.306655
Capn5	1.33489	3.35201	4.87298	0.0272803	0.306655
Pbk	2.75151	2.96698	4.87787	0.0272031	0.306655
Gsta3	-6.66807	4.22349	4.87625	0.0272288	0.306655
Jade1	-1.71434	3.37478	4.87336	0.0272743	0.306655
Sec24a	-1.3585	3.44866	4.84851	0.02767	0.307957
Gm43860	2.60624	1.04234	4.85594	0.0275512	0.307957
Pik3cd	0.898693	7.4473	4.85282	0.027601	0.307957
Mtdh	-0.809892	6.14878	4.85363	0.0275881	0.307957
Zfp874b	-0.937464	5.28554	4.85332	0.0275929	0.307957
Rundc3a	3.72495	3.96153	4.85646	0.0275427	0.307957
Ddx52	-0.81987	6.16285	4.84972	0.0276506	0.307957
Prr13	1.14317	5.01552	4.85393	0.0275833	0.307957
Dnajb1	0.89366	5.97819	4.84599	0.0277104	0.307957
Ppp2r5b	2.30827	5.26891	4.84697	0.0276947	0.307957
B3gnt5	-0.984642	6.12266	4.85785	0.0275206	0.307957
Tuba4a	1.62561	9.41948	4.84182	0.0277776	0.308068
Thap3	1.3753	3.18663	4.84343	0.0277516	0.308068
Tcf3	1.14707	3.99721	4.83608	0.0278702	0.3087
Pde3b	-0.813285	5.48147	4.83258	0.0279269	0.3087
Fbxl8	2.49111	0.911927	4.83121	0.0279491	0.3087
Tdo2	-10.2989	2.38406	4.83432	0.0278987	0.3087
Nudt17	3.00081	1.32714	4.81122	0.0282751	0.311026
mt.Co3	-1.41945	2.94729	4.81465	0.0282188	0.311026
Itgax	1.15418	5.64658	4.81344	0.0282386	0.311026
Taf1b	-0.860165	4.98653	4.81269	0.0282508	0.311026
Srp14	0.804004	7.18982	4.80701	0.0283442	0.311468
B3galt4	1.8532	2.44643	4.80233	0.0284213	0.31168
Igfbp4	-2.13344	5.28248	4.80357	0.0284008	0.31168
Pctp	-1.22561	4.00653	4.79856	0.0284835	0.312045
Plekha1	-0.778239	5.00242	4.7926	0.0285823	0.312809
Dhcr7	-3.64078	1.17485	4.7879	0.0286604	0.313346
Chchd1	-1.04685	5.18357	4.78511	0.0287069	0.313536
Thnsl1	-2.26838	2.0789	4.7759	0.0288608	0.313945
Il7r	-0.969327	6.22578	4.77731	0.0288371	0.313945
Lca5	2.53251	1.71965	4.77742	0.0288353	0.313945
Ndufs3	-0.96425	5.93959	4.7809	0.028777	0.313945
Osbpl5	1.1052	3.79139	4.77404	0.028892	0.313967
Fgg	-13.719	5.45323	4.77168	0.0289315	0.314056
Hmbs	1.90383	8.81497	4.77008	0.0289584	0.314056
Hmces	1.15837	3.76712	4.76173	0.0290992	0.315082
Polg2	-1.50538	3.27162	4.76101	0.0291115	0.315082
Ccnl1	-0.965907	6.18186	4.75908	0.0291442	0.315119
Tnfrsf18	1.15366	4.43756	4.75211	0.0292623	0.316075
Sult1a1	-4.32352	4.31658	4.75042	0.0292912	0.316075
Scp2	-0.72471	7.33542	4.74488	0.0293857	0.316461
Commd10	-0.998668	3.5172	4.74572	0.0293712	0.316461
Raly	1.08366	8.60478	4.74218	0.0294318	0.316642
Rpl18a	0.941654	9.99453	4.73795	0.0295043	0.316948
Chtf18	2.9666	0.954612	4.73708	0.0295191	0.316948
Slc4a7	-1.01929	4.93206	4.73166	0.0296123	0.317595
Pfkp	0.969925	7.04138	4.73015	0.0296383	0.317595
Tmcc2	2.55808	8.76613	4.72838	0.0296688	0.317607
Clspn	3.24437	2.26914	4.72374	0.0297489	0.318148
Rnf219	-2.08095	2.76636	4.72081	0.0297997	0.318375
Ttc14	-0.952545	5.70174	4.71375	0.0299223	0.319368
Lpgat1	-0.744579	5.64666	4.70953	0.0299959	0.319838
Eif4e3	2.39517	1.81354	4.69944	0.0301725	0.320909
Dennd6a	-0.879455	5.41915	4.69868	0.0301857	0.320909
Slc17a9	1.36609	2.85847	4.69966	0.0301686	0.320909
Lgals9	0.921879	7.7188	4.69621	0.0302292	0.321055
Zcchc24	-2.1929	2.46477	4.69372	0.0302731	0.321101
Prkrip1	1.31125	3.5685	4.69258	0.0302931	0.321101
Tsc22d3	0.879722	8.30333	4.69045	0.0303308	0.321184
Tbce	-0.799295	5.06462	4.68636	0.030403	0.321634
Rgs2	-0.98153	7.04992	4.68351	0.0304534	0.321851
2310011J03Rik	1.01947	4.31397	4.67916	0.0305306	0.322071
Akt1	0.945522	5.36533	4.67792	0.0305528	0.322071
G2e3	-1.19944	3.83381	4.67594	0.030588	0.322071
Fus	-2.53118	1.54142	4.67226	0.0306535	0.322071
Cst7	1.2783	5.14273	4.67539	0.0305978	0.322071
Dhrs4	-1.22599	4.01739	4.67312	0.0306382	0.322071
Syncrip	-0.779573	5.98649	4.67052	0.0306847	0.322084
Cactin	1.17664	3.74962	4.66855	0.0307198	0.32214
Rhog	0.760371	5.17821	4.66628	0.0307604	0.322252
Slc8b1	1.28713	4.08102	4.66107	0.0308539	0.322918
Serpina1d	-14.0804	5.71653	4.65732	0.0309214	0.322997
Acsl4	-0.96122	4.92556	4.65827	0.0309043	0.322997
Zfp62	-0.964026	5.46046	4.6515	0.0310265	0.323781
Ifi35	0.995232	6.97255	4.64725	0.0311033	0.324268
Zfp938	-1.89313	2.30773	4.64491	0.0311458	0.324397
Ighv5.16	2.53813	1.33859	4.63248	0.0313721	0.326439
Sipa1	0.851693	5.55027	4.62969	0.0314232	0.326504
Rpl22l1	-0.815625	7.16591	4.62884	0.0314388	0.326504
Sox4	-2.64077	2.90263	4.62616	0.0314879	0.326698
Cox11	-1.91583	2.5104	4.61189	0.031751	0.326915
Slc39a11	-1.38949	2.80898	4.61211	0.0317469	0.326915
Tdrd7	1.00481	6.20997	4.61467	0.0316995	0.326915
Igkv1.135	2.09997	1.9982	4.6177	0.0316437	0.326915
Ap1m1	0.9296	4.20062	4.62157	0.0315724	0.326915
Adrm1	1.2651	3.26011	4.61827	0.0316332	0.326915
Mbd5	-2.00668	2.37814	4.61187	0.0317514	0.326915
Nkiras2	1.13297	4.53455	4.61764	0.0316448	0.326915
Atp6v1e1	0.878666	7.19454	4.60965	0.0317926	0.327027
Pbx3	2.0565	2.3055	4.60026	0.031967	0.328508
Coa6	-1.73306	2.89194	4.59728	0.0320227	0.328767
Nmnat1	-2.44804	2.44825	4.59114	0.0321376	0.329632
Gm14403	-4.67876	1.05781	4.58723	0.032211	0.330031
Apoc3	-12.3102	3.92728	4.58581	0.0322377	0.330031
Il3ra	2.85087	1.01299	4.58147	0.0323194	0.330553
Pdhb	-0.718575	5.91318	4.57194	0.0324997	0.331768
Gm28661	-1.38697	4.27124	4.57356	0.0324689	0.331768
Galm	-1.98156	2.62496	4.56688	0.0325959	0.332435
Kctd7	1.88232	1.57265	4.56298	0.0326702	0.332878
Rhov	3.21473	0.499157	4.55486	0.0328254	0.334143
Eno1	0.876432	7.5188	4.54293	0.0330549	0.336162
Ints8	-0.968567	5.12996	4.53663	0.0331768	0.337083
Map2k2	1.46333	7.08236	4.53307	0.0332459	0.337468
Stat1	1.04076	7.58998	4.5298	0.0333095	0.337796
Rnf126	1.66062	1.55797	4.52478	0.0334074	0.338152
Plekho1	0.837847	5.86111	4.52518	0.0333995	0.338152
Rap2a	1.38615	3.89277	4.52057	0.0334897	0.338667
Ap2a2	0.713339	5.8472	4.51791	0.0335418	0.338876
Unc93b1	0.860762	6.49184	4.51526	0.0335938	0.338924
Kras	-0.714162	5.95833	4.51089	0.0336797	0.338924
Insig2	-1.32448	3.60206	4.51174	0.033663	0.338924
Ifit3	2.03823	8.41967	4.51082	0.0336812	0.338924
Gnpnat1	-1.21974	4.22388	4.50967	0.0337037	0.338924
Btbd1	-0.734461	6.22019	4.49811	0.0339322	0.340904
Kcnn3	3.19544	0.35502	4.4939	0.0340159	0.341426
H2.DMa	0.815844	6.78046	4.48874	0.0341188	0.341505
Lsm8	-1.20286	4.23304	4.48927	0.0341083	0.341505
Gpi1	0.837407	7.10841	4.49087	0.0340764	0.341505
Prr5l	1.04437	4.7019	4.48662	0.0341611	0.341611
Sdc3	1.39502	5.19573	4.48383	0.034217	0.341853
Zfp974	-2.08782	1.9817	4.4806	0.0342818	0.342131
Timeless	1.58087	3.34047	4.47927	0.0343083	0.342131
Zfp329	-1.40431	3.98104	4.47459	0.0344024	0.342191
Vars	0.858515	5.54403	4.47424	0.0344096	0.342191
Nkg7	1.48517	6.39075	4.47722	0.0343496	0.342191
Ccl8	3.15996	0.613302	4.46879	0.0345194	0.342336
Hpd	-13.2716	4.90663	4.47139	0.0344669	0.342336
Dusp2	0.981364	5.36856	4.46891	0.034517	0.342336
Aaed1	-0.912156	5.02247	4.4638	0.0346205	0.342947
D430019H16Rik	3.73877	0.579977	4.4626	0.0346447	0.342947
Lypla2	1.06214	4.95563	4.45648	0.0347691	0.343863
Akt1s1	-1.70736	2.5339	4.44509	0.0350018	0.34473
0.72	-3.92771	1.16772	4.44434	0.0350171	0.34473
Ifi27l2a	1.60696	9.14809	4.44384	0.0350274	0.34473
Stk11	0.984059	6.00918	4.44125	0.0350806	0.34473
Psen1	0.634076	6.05755	4.44771	0.034948	0.34473
Nubpl	-2.40842	2.1126	4.44169	0.0350715	0.34473
Brms1l	-1.43226	3.15232	4.44226	0.0350598	0.34473
Usp34	-0.749142	6.50838	4.43477	0.035214	0.345491
Dhx36	-0.784241	5.635	4.43437	0.0352221	0.345491
Cotl1	0.925654	7.29852	4.4266	0.0353829	0.346372
Gm11827	3.73893	0.439405	4.42435	0.0354297	0.346372
Apob	-12.9797	4.71215	4.4259	0.0353975	0.346372
Wsb2	0.827675	5.093	4.42073	0.0355048	0.346372
Smarcd2	0.786905	6.26603	4.42306	0.0354563	0.346372
Slc9a3r2	3.04239	2.26955	4.42138	0.0354913	0.346372
Ctsk	-3.88203	0.759665	4.41578	0.035608	0.346747
Tmtc3	-2.47813	1.1879	4.41532	0.0356175	0.346747
Cenpt	2.17989	2.24565	4.41426	0.0356397	0.346747
Crlf2	1.91677	2.43092	4.41088	0.0357103	0.347053
Ksr1	2.38728	1.39433	4.40968	0.0357355	0.347053
Itgad	2.85802	2.12002	4.40531	0.0358273	0.347631
Hibch	-1.26492	4.1271	4.40257	0.0358849	0.347877
H2.K1	0.947735	11.2775	4.39918	0.0359563	0.348256
Oscp1	-2.97421	1.19766	4.3909	0.0361313	0.349439
Mpp7	-2.14541	2.30552	4.39033	0.0361433	0.349439
Oaf	-4.16973	1.83566	4.38517	0.0362528	0.349932
Epha2	4.04434	1.62355	4.38487	0.0362592	0.349932
Lck	0.936521	7.89409	4.3752	0.0364656	0.35161
Ndufaf2	-2.3856	1.9862	4.37235	0.0365266	0.351883
Hdac4	1.13395	4.10498	4.37067	0.0365627	0.351916
Mrps18c	-1.34842	4.10747	4.36758	0.036629	0.35194
Tpgs1	1.66303	1.98883	4.36751	0.0366305	0.35194
Atp23	-2.14969	1.59231	4.3658	0.0366672	0.351979
Ppp6r1	0.843457	5.97155	4.36246	0.0367391	0.352356
Cops9	-0.718825	5.10133	4.34753	0.0370626	0.352635
Acbd6	-1.19663	3.51471	4.35342	0.0369348	0.352635
Clca3a1	2.65483	3.72696	4.34836	0.0370447	0.352635
Zfp846	-1.79714	2.80367	4.35234	0.036958	0.352635
Adgre5	0.719641	7.90496	4.3582	0.0368312	0.352635
Vtn	-12.8331	4.64522	4.3485	0.0370415	0.352635
Msl1	-0.752906	5.51334	4.35376	0.0369273	0.352635
Kri1	0.831589	5.17845	4.35264	0.0369516	0.352635
Pepd	0.799355	6.17686	4.34905	0.0370296	0.352635
Tusc2	-1.04804	4.20812	4.34451	0.0371284	0.352949
Eid1	-0.82944	5.44939	4.33427	0.0373524	0.354454
Fam126b	-1.57836	2.96384	4.33503	0.0373358	0.354454
Ubn2	-0.949608	4.7212	4.32578	0.0375392	0.35494
Pigh	-1.32622	3.73684	4.32446	0.0375683	0.35494
Scamp5	2.45606	1.82574	4.32474	0.0375621	0.35494
E2f1	2.61668	1.42303	4.32968	0.0374533	0.35494
Fbxo5	-1.88843	3.44825	4.32476	0.0375617	0.35494
Dusp14	2.61468	2.25417	4.31804	0.0377103	0.35597
Gnrh1	-2.89919	1.03798	4.31462	0.0377863	0.356374
Sympk	0.809645	4.79863	4.30235	0.0380598	0.356471
Usp54	2.63113	1.22537	4.30469	0.0380075	0.356471
Os9	0.781728	5.90394	4.30285	0.0380485	0.356471
Ppp1r10	1.59039	2.39654	4.31184	0.037848	0.356471
Susd3	1.10063	4.50336	4.30995	0.03789	0.356471
Iglc3	-1.10549	6.50018	4.30573	0.0379843	0.356471
Plscr4	2.14439	1.15794	4.30229	0.0380611	0.356471
Mbtd1	-1.07322	4.5238	4.3025	0.0380564	0.356471
Nat2	-1.58377	4.10209	4.29972	0.0381187	0.356701
Mtm1	-1.0438	3.62025	4.29664	0.0381878	0.356874
Gna12	1.01904	3.68414	4.29594	0.0382034	0.356874
Apobec2	2.53011	3.26431	4.29236	0.0382841	0.357306
Scfd1	-0.716423	5.65794	4.29094	0.038316	0.357306
Kntc1	1.99801	2.9025	4.28944	0.0383499	0.357313
Wdr24	1.79336	2.55549	4.28324	0.03849	0.357383
Mysm1	-1.02372	4.57097	4.28655	0.0384149	0.357383
Pcca	-1.81052	3.0682	4.28609	0.0384255	0.357383
Btbd9	1.04859	4.37677	4.28329	0.0384887	0.357383
Gm13436	1.15755	3.06674	4.27594	0.0386557	0.358304
Spast	-0.693614	5.16231	4.27694	0.0386328	0.358304
Cacna1s	2.21409	1.83951	4.27347	0.0387118	0.358516
Gzmk	3.16563	5.55918	4.26227	0.0389677	0.359374
Gk5	-3.25412	1.52056	4.26229	0.0389673	0.359374
Def6	0.851398	5.45001	4.26213	0.038971	0.359374
Atp5g3	-0.861221	6.06872	4.26253	0.0389618	0.359374
Cdk13	-1.09491	4.42504	4.26567	0.0388899	0.359374
Kif1b	-0.853672	4.82426	4.2514	0.039218	0.359544
Rbp4	-13.0045	4.51652	4.25567	0.0391196	0.359544
Cfdp1	-0.843103	5.59753	4.25309	0.0391789	0.359544
Kat2a	1.2484	3.72287	4.25341	0.0391716	0.359544
Jmy	-1.40436	3.16344	4.25118	0.039223	0.359544
Ireb2	-0.94729	5.54899	4.25787	0.0390688	0.359544
Zfp229	-3.44942	1.32277	4.25498	0.0391355	0.359544
Thy1	1.01771	6.6864	4.24914	0.0392702	0.359671
Yipf3	1.67525	2.72629	4.2465	0.0393312	0.359924
Trpm4	2.04304	1.79716	4.24355	0.0393997	0.360245
Slc35d2	-1.43665	3.85869	4.24133	0.0394513	0.360411
Haspin	1.50686	3.44977	4.23686	0.0395552	0.360444
Nat8f2	-11.2456	3.04368	4.23828	0.0395222	0.360444
Wdfy3	-2.01368	2.07849	4.23879	0.0395103	0.360444
Asl	-1.72525	4.86475	4.23208	0.0396668	0.361155
R3hdm2	-1.5561	1.32591	4.22908	0.0397371	0.36149
Tlr1	-0.701374	6.28224	4.21857	0.0399838	0.362866
Mfsd7a	2.50869	2.82449	4.21834	0.0399894	0.362866
Usp40	-1.1973	3.95639	4.21939	0.0399645	0.362866
Nt5c	0.879468	5.14113	4.21637	0.0400357	0.362981
Irak4	0.849182	4.8544	4.20991	0.0401885	0.36406
H2.DMb1	0.999091	5.05522	4.20841	0.040224	0.364076
Tmem101	1.41344	2.57164	4.20426	0.0403225	0.364355
Prpsap1	0.760325	5.05935	4.20436	0.0403201	0.364355
1110008L16Rik	-1.42923	3.08452	4.20278	0.0403579	0.36437
Plcb1	-2.07898	2.76831	4.20106	0.0403987	0.364433
Ankrd46	-1.0322	4.48261	4.19416	0.0405634	0.365613
Hnf4a	-10.221	2.26573	4.17204	0.0410962	0.365708
Rnf213	1.06042	8.12511	4.17361	0.0410583	0.365708
Gfod1	1.25836	2.87468	4.18296	0.0408322	0.365708
Tmed10	-0.769852	6.1039	4.18875	0.0406932	0.365708
Agfg2	-1.43239	3.54984	4.17567	0.0410084	0.365708
Gm12715	1.85392	1.90981	4.18555	0.0407699	0.365708
Brd3	-1.10402	3.5956	4.18848	0.0406997	0.365708
Cct7	0.920871	8.35852	4.18026	0.0408974	0.365708
Nomo1	1.05219	5.68077	4.176	0.0410004	0.365708
Abhd6	-2.42882	2.21602	4.17501	0.0410244	0.365708
Dapk2	1.7528	6.00084	4.1712	0.0411168	0.365708
Rfwd3	-0.803184	5.04818	4.18636	0.0407504	0.365708
3110062M04Rik	1.70948	2.42543	4.17333	0.041065	0.365708
Mug1	-12.9841	4.60725	4.18758	0.0407212	0.365708
Dstyk	-1.39564	3.80462	4.18367	0.0408153	0.365708
Map4k1	0.917552	4.84673	4.17993	0.0409053	0.365708
Pnpla2	1.09699	4.42345	4.16459	0.0412775	0.365791
Wdr81	1.21325	4.65562	4.16384	0.0412957	0.365791
Ppp1r12c	0.691946	6.32333	4.16693	0.0412205	0.365791
Tnfrsf8	1.4523	3.37878	4.16636	0.0412342	0.365791
E230001N04Rik	-2.56958	0.971812	4.166	0.0412431	0.365791
Lag3	2.3022	3.09342	4.1572	0.0414578	0.36641
Echdc1	-1.43164	3.55902	4.1577	0.0414457	0.36641
Slc43a1	1.98987	6.76654	4.15681	0.0414675	0.36641
Gm6548	1.25033	5.02793	4.14864	0.041668	0.367578
Zzz3	-0.85029	5.36497	4.14913	0.041656	0.367578
Lat	1.03554	6.3931	4.14657	0.0417189	0.367727
Cox18	-1.8491	2.50762	4.14462	0.0417671	0.367851
Zfp318	-0.882117	5.39929	4.14127	0.0418498	0.368279
Zfp429	-0.852719	4.51959	4.13474	0.0420115	0.369276
Slf2	-0.966357	4.40198	4.133	0.0420547	0.369276
Ppid	-0.926907	5.33989	4.13117	0.0421002	0.369276
Rnf121	-1.27361	3.54236	4.13252	0.0420667	0.369276
Tmem106a	1.22993	3.8696	4.12687	0.0422074	0.369615
Fadd	-2.43764	1.14108	4.12741	0.0421938	0.369615
Mylpf	2.04719	2.65616	4.12398	0.0422796	0.369946
Rnh1	0.901317	7.06531	4.11906	0.0424026	0.370345
Gm47260	-2.27659	1.03576	4.11912	0.0424011	0.370345
Itga7	2.95388	0.574292	4.11305	0.0425536	0.370345
Gm43698	-2.22599	1.78644	4.11286	0.0425584	0.370345
Acot7	1.01923	4.85291	4.11257	0.0425656	0.370345
Clk4	-0.782886	5.78002	4.11282	0.0425593	0.370345
Gm49336	-0.85525	4.98945	4.11564	0.0424885	0.370345
Stap1	-0.947045	6.18221	4.10984	0.0426344	0.370644
Hdac11	-2.75542	1.65355	4.10057	0.0428688	0.372082
Faf1	-0.731619	5.55371	4.10148	0.0428458	0.372082
Cyth1	0.672867	6.63662	4.09819	0.0429293	0.372307
Abtb1	1.2004	6.85156	4.09382	0.0430402	0.372969
Psme1	0.743694	8.36856	4.09218	0.0430822	0.373033
Rbm26	-1.1335	4.14349	4.08808	0.0431868	0.373638
Ralgps2	-0.821561	6.48921	4.08492	0.0432674	0.373862
Tmco4	1.1098	4.50656	4.08435	0.043282	0.373862
F630028O10Rik	-1.22552	5.45927	4.08056	0.0433793	0.374132
Clec4a2	-1.30388	4.67025	4.08043	0.0433827	0.374132
Flna	0.865616	8.73536	4.07808	0.0434431	0.374354
Csgalnact2	-0.906119	5.06214	4.04329	0.0443472	0.3747
Ahr	1.24806	3.26482	4.04374	0.0443355	0.3747
Dusp5	1.16868	4.13174	4.06342	0.0438216	0.3747
Ercc6	-1.04106	3.8702	4.05617	0.0440101	0.3747
Rps9	0.840601	10.4472	4.04755	0.0442356	0.3747
Rps6ka1	0.793107	6.40737	4.05902	0.0439361	0.3747
Arhgap26	-1.12099	3.83835	4.06536	0.0437712	0.3747
Sec23b	0.668427	5.47431	4.04419	0.0443236	0.3747
Crip2	1.87651	2.69658	4.06183	0.043863	0.3747
Ehd3	0.771738	4.54294	4.06491	0.0437831	0.3747
Map1s	1.9707	1.97822	4.06415	0.0438027	0.3747
Nme1	-1.02742	4.66117	4.05771	0.04397	0.3747
Cmah	-0.795777	6.56864	4.04687	0.0442533	0.3747
Fkbpl	1.74552	2.43091	4.05731	0.0439804	0.3747
Bet1	-1.2373	3.534	4.04772	0.0442312	0.3747
Fam109a	2.29635	1.5129	4.05861	0.0439466	0.3747
Fpgt	-1.20511	3.67845	4.04567	0.0442848	0.3747
Miip	0.859642	4.84583	4.04762	0.0442338	0.3747
Trim44	-0.654313	5.44931	4.06683	0.0437333	0.3747
Dbp	-1.91988	2.18778	4.0668	0.043734	0.3747
Glul	1.30586	9.34887	4.06448	0.043794	0.3747
Polr2e	1.15061	3.73606	4.06272	0.0438397	0.3747
Rnf25	-0.841367	4.71352	4.0495	0.0441844	0.3747
Cox14	1.06844	4.31347	4.0431	0.0443522	0.3747
Gm10384	-2.17722	1.42336	4.06942	0.0436663	0.3747
Tada3	2.12464	2.08856	4.03038	0.044688	0.376946
Mdm2	-0.618128	5.83831	4.03144	0.0446598	0.376946
Arhgap15	-0.775388	7.11583	4.02796	0.0447519	0.37719
Shkbp1	1.21948	3.18351	4.02121	0.0449314	0.378407
Ext1	-0.950156	4.21051	4.01711	0.0450407	0.379031
Get4	1.10098	4.30921	4.01427	0.0451168	0.379079
Zfp943	-0.843117	4.87091	4.01487	0.0451008	0.379079
Nacc2	1.30594	3.90572	4.00707	0.0453097	0.380108
Snd1	0.776625	5.48743	4.00746	0.0452992	0.380108
D730003I15Rik	-2.02249	1.53394	4.00558	0.0453499	0.380132
Tmub2	0.904107	3.89957	4.00435	0.0453831	0.380132
Errfi1	-2.37023	3.09048	4.0025	0.0454328	0.380252
Ahcy	-1.29955	5.31083	3.99937	0.0455172	0.380664
Rbm34	-0.871842	4.44601	3.99529	0.0456275	0.38116
Hsh2d	1.13463	4.99407	3.99456	0.0456473	0.38116
Ift74	-2.12951	1.99867	3.99096	0.0457451	0.381681
Platr25	-1.27264	3.42059	3.98906	0.0457965	0.381815
2700062C07Rik	-1.17743	3.3377	3.98348	0.0459486	0.381901
Ccar1	-0.689093	5.72272	3.98721	0.0458468	0.381901
Akap8	-0.689578	6.5281	3.98364	0.0459441	0.381901
Cluh	-1.55598	3.52504	3.98377	0.0459407	0.381901
Rpgrip1l	-2.37343	1.82894	3.97934	0.0460617	0.381958
Prdx1	-0.873227	8.42685	3.97967	0.0460525	0.381958
Mgst1	-0.980628	6.8833	3.98039	0.0460329	0.381958
Lemd3	-1.26983	3.87557	3.97537	0.0461704	0.382349
Arhgap39	2.04173	1.43577	3.97503	0.0461798	0.382349
Cxcr4	1.09686	4.693	3.97181	0.0462681	0.382786
Uox	-12.2699	4.26431	3.96899	0.0463456	0.383133
Plekhj1	1.05945	3.51747	3.96541	0.0464441	0.383595
Eif2ak1	1.40595	6.38211	3.96438	0.0464726	0.383595
Camp	2.5331	4.95058	3.96309	0.0465084	0.383596
Eml3	0.808206	5.20224	3.96057	0.0465778	0.383875
Aldh1l1	-3.89947	4.05208	3.95672	0.0466845	0.384461
C1rl	-2.27494	2.24057	3.95509	0.0467297	0.384539
Slc7a6os	-1.23068	3.74393	3.95233	0.0468066	0.384878
Sertad1	0.971747	4.82555	3.94971	0.0468796	0.385184
Aip	1.24712	6.36734	3.9446	0.0470219	0.385407
Pdlim7	1.49297	3.65727	3.94361	0.0470497	0.385407
Spcs3	-0.659513	6.4089	3.94738	0.0469443	0.385407
Edf1	0.963115	6.06515	3.94518	0.0470059	0.385407
Psmd12	-0.762012	6.0463	3.94104	0.0471217	0.385703
Bmx	-1.6776	3.63185	3.93973	0.0471583	0.38571
Dnm2	0.722309	6.50096	3.93565	0.0472729	0.386062
Gbe1	-1.09671	4.19704	3.93575	0.04727	0.386062
2008-09-01	1.70143	3.05179	3.93181	0.0473811	0.386652
Gm17491	-1.1954	3.24352	3.92996	0.0474332	0.386785
Tmem14c	0.826431	6.13767	3.9243	0.0475931	0.387664
Dennd1c	1.75963	2.71395	3.91945	0.0477305	0.387664
Ercc6l2	-1.33688	3.76392	3.91793	0.0477736	0.387664
Flot1	0.735987	5.45615	3.92243	0.047646	0.387664
Unc45a	1.08242	3.77541	3.91808	0.0477693	0.387664
Ankfy1	0.667284	5.90578	3.91726	0.0477927	0.387664
Cdk5rap1	-1.66459	3.40088	3.92075	0.0476936	0.387664
Elob	1.40524	8.8749	3.91032	0.0479905	0.387809
Fcho1	1.54321	3.41029	3.91438	0.0478745	0.387809
Tspoap1	2.41399	1.22076	3.91286	0.0479181	0.387809
Gtf2a1	-0.855063	4.54408	3.91077	0.0479775	0.387809
Deaf1	1.34402	2.83614	3.91171	0.0479509	0.387809
Mir142hg	1.32951	4.32965	3.89635	0.0483911	0.387816
Matr3	-0.680527	7.00915	3.89695	0.0483739	0.387816
Psmb3	0.848297	6.97979	3.89987	0.04829	0.387816
Plpp6	-1.39956	3.24558	3.89444	0.0484461	0.387816
Zfp296	2.20579	1.56286	3.90381	0.0481767	0.387816
Nfe2	1.04432	7.32256	3.90003	0.0482853	0.387816
Zc4h2	2.00444	1.53041	3.90481	0.0481479	0.387816
Ccdc92b	2.37844	2.90632	3.89835	0.0483337	0.387816
Mrpl33	-0.712718	5.17873	3.89635	0.048391	0.387816
Kif18b	2.82492	1.04478	3.90544	0.04813	0.387816
Zfp131	-0.846212	4.90385	3.89399	0.0484591	0.387816
Pold1	1.17652	4.20391	3.90847	0.0480433	0.387816
Atg2a	1.27165	3.5905	3.89779	0.0483498	0.387816
Fam133b	-1.05416	4.66667	3.8916	0.0485283	0.387957
Nagpa	0.938909	4.05782	3.89022	0.048568	0.387957
Zfp606	-1.55533	3.16922	3.88965	0.0485846	0.387957
dh	0.884533	7.41987	3.88733	0.0486518	0.388206
Nt5dc1	-0.836178	4.22101	3.88168	0.0488157	0.388938
Lipc	-2.52339	2.86852	3.88231	0.0487974	0.388938
Bin2	0.835902	7.39468	3.87712	0.0489484	0.389707
Dgkz	0.879574	5.78328	3.87298	0.0490693	0.390094
Fmo1	-4.56024	1.76401	3.87336	0.0490582	0.390094
Mov10	1.77237	3.21453	3.87095	0.0491288	0.390279
Nop53	0.713492	7.64694	3.86703	0.0492435	0.390327
Cbx7	-1.00245	3.57521	3.86813	0.0492115	0.390327
Impdh1	1.61912	2.45561	3.86771	0.0492238	0.390327
Sparc	-4.78696	2.37799	3.8651	0.0493004	0.390491
Rinl	0.906919	5.80595	3.8593	0.0494711	0.391471
Coq4	-2.00737	1.83738	3.85843	0.0494967	0.391471
Zfp26	-0.956017	4.46747	3.85413	0.0496238	0.392188
Sin3b	0.910248	7.76233	3.84719	0.0498295	0.392375
Rbm12	-1.09748	3.46427	3.84957	0.0497587	0.392375
Poc1a	2.1513	2.42115	3.85003	0.0497452	0.392375
Bora	-1.53838	2.99554	3.84782	0.0498108	0.392375
Plg	-11.8597	3.69393	3.8514	0.0497044	0.392375
Maoa	-3.80319	1.07789	3.84489	0.0498978	0.392627
Clcn4	-0.699579	5.74805	3.84055	0.050027	0.393356
Actr5	1.3051	2.83382	3.83755	0.0501168	0.393524
Slc23a2	1.39686	2.50643	3.83739	0.0501214	0.393524
Sh3gl1	1.08058	4.85306	3.82755	0.0504165	0.393775
Usp24	-0.708798	5.29137	3.82488	0.0504971	0.393775
Mapkapk2	0.759436	7.63828	3.81811	0.0507013	0.393775
Myof	1.44293	4.7603	3.82146	0.0506002	0.393775
A130010J15Rik	-1.31066	2.5535	3.82586	0.0504674	0.393775
Gramd4	0.739992	5.54298	3.81904	0.0506732	0.393775
Gp1ba	2.09728	3.45161	3.82597	0.050464	0.393775
Gprin3	-2.61059	1.20981	3.83489	0.0501963	0.393775
Mtf2	-0.803484	4.7398	3.82994	0.0503446	0.393775
Ankrd49	-1.2432	4.23375	3.81953	0.0506585	0.393775
Apex1	-0.911519	4.99942	3.83199	0.0502832	0.393775
Zcchc4	-0.950358	3.6211	3.83101	0.0503126	0.393775
Csf1	1.87655	3.05188	3.82433	0.0505137	0.393775
Park7	0.731814	6.15233	3.82314	0.0505495	0.393775
Rnaseh2c	1.32749	3.66303	3.81984	0.0506491	0.393775
Slc11a1	0.975312	6.00779	3.81411	0.0508227	0.39415
Dnajb5	2.76686	0.989111	3.81467	0.0508057	0.39415
Magt1	-0.780705	5.9655	3.81003	0.0509464	0.394826
Rnaseh2b	0.874888	5.27347	3.80837	0.0509971	0.394935
Gm6563	-1.1769	3.90524	3.8067	0.0510478	0.394978
Ifit1bl1	1.07352	7.64307	3.80578	0.0510761	0.394978
Haao	-1.10118	4.93422	3.80283	0.0511662	0.395108
Hyi	-1.2473	2.45482	3.80374	0.0511381	0.395108
Map3k1	-0.888046	5.95128	3.79459	0.0514184	0.395639
Sycp2	-2.02426	2.28712	3.79489	0.0514093	0.395639
E4f1	0.955287	3.58488	3.7959	0.0513781	0.395639
Hsbp1	-0.77804	6.11748	3.7974	0.0513322	0.395639
Polr2i	1.33984	3.22189	3.79671	0.0513533	0.395639
Slc25a25	-1.02267	3.6894	3.7931	0.0514643	0.39571
Laptm5	0.679476	7.05261	3.78992	0.0515621	0.39618
Pnisr	-0.78351	5.80511	3.78854	0.0516046	0.396223
Yme1l1	-0.710417	6.71079	3.78251	0.0517909	0.39737
Zfp451	-0.897208	4.42597	3.77413	0.052051	0.397387
Heca	-0.831987	6.34803	3.77481	0.0520298	0.397387
Sgpp1	-0.803958	5.59654	3.77592	0.0519953	0.397387
Mrpl12	-1.30045	3.41087	3.77514	0.0520197	0.397387
Rnf40	0.714113	5.3678	3.77931	0.0518901	0.397387
Crebzf	-0.888165	5.33677	3.77499	0.0520244	0.397387
Gas2	-1.81321	1.31687	3.7774	0.0519493	0.397387
B230219D22Rik	-0.755721	5.32729	3.77136	0.0521373	0.397582
Stip1	0.94656	5.03353	3.77094	0.0521504	0.397582
Dlgap4	1.03701	4.07099	3.76445	0.052353	0.398537
Pcm1	-0.998632	4.36555	3.76241	0.0524168	0.398537
Lsm5	-0.919671	4.1836	3.7622	0.0524235	0.398537
Smg5	0.706081	5.20708	3.76561	0.0523167	0.398537
Tmem184c	-0.985077	4.13863	3.75895	0.0525257	0.398751
Stk26	-0.877629	5.64064	3.75956	0.0525065	0.398751
Zfp14	-1.55893	1.64087	3.75756	0.0525692	0.398762
Gak	0.671357	5.06217	3.75655	0.0526011	0.398762
Cnih1	-0.937759	4.78687	3.75228	0.0527354	0.399499
Sucla2	-0.676556	5.40675	3.75043	0.0527939	0.399612
Nr2c2	-0.708226	5.7497	3.74947	0.0528244	0.399612
Orc4	-0.804777	5.57596	3.74788	0.0528745	0.399679
Aes	1.04182	4.50155	3.74684	0.0529075	0.399679
Cdc37l1	-0.944844	4.81703	3.73973	0.0531329	0.399702
Mkl1	1.14923	3.26135	3.7421	0.0530576	0.399702
Mrpl1	-0.956857	4.00919	3.74199	0.0530611	0.399702
Fmo5	-2.24891	2.8328	3.74432	0.0529872	0.399702
Mesd	-1.00607	4.20882	3.74358	0.0530107	0.399702
Far1	-0.72222	6.62886	3.74016	0.0531194	0.399702
Pex10	1.80276	1.40744	3.73832	0.0531778	0.399761
Pus3	-1.04838	4.52085	3.73637	0.0532401	0.39995
Smarcad1	-1.02559	4.19735	3.73472	0.0532926	0.400066
Cracr2a	-1.65367	2.88062	3.72787	0.0535116	0.401151
Ubxn1	0.741991	6.54914	3.72817	0.0535019	0.401151
Malt1	-0.726252	6.54551	3.72474	0.0536118	0.401623
Taf1d	-0.816545	5.53514	3.72349	0.0536521	0.401645
Itgb2l	2.42344	3.87743	3.72156	0.0537143	0.401832
Angptl3	-11.4108	3.10429	3.71836	0.053817	0.401911
Relt	0.855329	5.30541	3.71776	0.0538367	0.401911
Higd1a	-1.18589	4.85463	3.71851	0.0538125	0.401911
A530030E21Rik	-1.59439	3.70199	3.71605	0.0538917	0.402043
Arhgap35	-1.90508	1.73735	3.71122	0.0540478	0.402929
Zfp738	-1.13708	3.79683	3.70998	0.0540881	0.402951
Arl6	-2.9982	0.837758	3.7025	0.054331	0.404202
Rrp9	1.23729	3.34642	3.70281	0.0543211	0.404202
Ufsp2	-0.824217	5.01169	3.69881	0.0544513	0.404817
Trub1	-1.43227	2.88489	3.69635	0.0545318	0.404995
Ifi211	1.19121	5.86608	3.69463	0.054588	0.404995
Zbtb8os	-1.15575	3.86291	3.6953	0.0545659	0.404995
Sema4a	1.00981	5.02497	3.69236	0.0546621	0.405267
Kbtbd7	-1.38163	3.54588	3.68928	0.0547632	0.405298
Tbrg4	-1.95679	1.92518	3.68879	0.0547792	0.405298
Icam1	0.909574	5.8334	3.69092	0.0547094	0.405298
Copg2	-0.702591	5.76007	3.68683	0.0548436	0.405497
Tada2a	-1.88585	2.23596	3.68448	0.054921	0.405791
Mlf2	0.753465	5.42979	3.68278	0.054977	0.405926
Abi1	-0.649879	6.79904	3.68047	0.0550532	0.40621
Klhl28	-1.00916	4.12841	3.67682	0.0551738	0.406266
Wwtr1	2.54421	1.13482	3.67736	0.0551561	0.406266
Ly6g6f	1.50957	4.34496	3.67881	0.0551081	0.406266
Slc9a1	1.82967	1.41295	3.66936	0.0554213	0.407435
Rpl37	0.77477	9.29173	3.66763	0.055479	0.407435
Suox	-1.04294	3.83624	3.66973	0.0554092	0.407435
Piwil2	-3.1788	1.05196	3.66749	0.0554838	0.407435
Gbp2b	2.85306	5.53623	3.66528	0.0555573	0.407691
Snx22	2.60841	3.98102	3.66417	0.0555942	0.407691
1110059G10Rik	-1.00669	3.84688	3.65936	0.0557549	0.408565
Slc30a5	-0.669071	5.87854	3.653	0.0559683	0.408565
Taf7	-1.06245	4.29841	3.65666	0.0558453	0.408565
Hdac5	0.998263	4.32547	3.65731	0.0558237	0.408565
Clec2i	-0.829748	5.85952	3.65314	0.0559638	0.408565
Luc7l3	-0.763121	6.6122	3.65285	0.0559734	0.408565
Blm	-1.1774	3.39369	3.65269	0.0559787	0.408565
3110002H16Rik	1.0623	7.00833	3.65041	0.0560555	0.408849
Itih2	-10.7492	2.67117	3.64738	0.0561577	0.409277
Fggy	-2.99697	1.82698	3.63365	0.0566226	0.409277
Srf	1.21534	3.74788	3.62828	0.0568054	0.409277
Rnf220	0.759668	5.3426	3.63402	0.0566098	0.409277
Fes	0.842892	6.28866	3.64284	0.0563106	0.409277
1500011K16Rik	2.19808	1.3235	3.63385	0.0566159	0.409277
Bex3	-1.11671	4.08405	3.63031	0.0567362	0.409277
F2	-12.0579	3.89769	3.6274	0.0568355	0.409277
2510039O18Rik	0.901966	4.88427	3.6423	0.0563292	0.409277
Smim19	-1.96099	2.25509	3.64079	0.0563803	0.409277
Agpat2	-1.37039	3.73758	3.63875	0.0564493	0.409277
Rexo5	1.26789	3.05227	3.64487	0.0562421	0.409277
Ogdh	0.727994	6.46707	3.63509	0.0565735	0.409277
Tmed9	0.771795	5.78884	3.62848	0.0567987	0.409277
A730011C13Rik	1.95467	1.651	3.64155	0.0563543	0.409277
Slc27a2	-3.34397	2.74187	3.64329	0.0562955	0.409277
Dmtf1	-0.823495	4.96305	3.63478	0.056584	0.409277
Nipal1	-2.11765	2.42965	3.62981	0.0567534	0.409277
Ikbip	-2.00021	2.25537	3.62879	0.056788	0.409277
Orai3	0.802145	5.07132	3.62383	0.0569578	0.409346
Svip	-2.13806	2.53556	3.6239	0.0569552	0.409346
Pzp	-13.0028	5.04944	3.62379	0.0569591	0.409346
Zxdb	-1.59343	2.23583	3.61992	0.0570917	0.409753
Fam234a	1.05115	4.76189	3.62002	0.0570881	0.409753
Nme6	-1.68136	2.61249	3.61702	0.0571914	0.409947
Ccl5	1.49972	6.59778	3.61692	0.0571948	0.409947
Sarnp	-0.675669	6.02165	3.61521	0.0572535	0.410095
Rnf135	-1.50019	2.86133	3.60987	0.0574375	0.410833
Upb1	-2.25792	2.32142	3.61031	0.0574225	0.410833
Zfp617	-0.880344	4.44666	3.60891	0.0574709	0.410833
Mrpl42	-1.02958	4.79566	3.60475	0.0576146	0.411367
Itga2b	1.45173	8.93217	3.60454	0.0576219	0.411367
Mast4	-2.64947	1.55796	3.60096	0.0577462	0.411437
Dimt1	-1.52555	2.81504	3.60118	0.0577386	0.411437
Etv6	0.738224	4.70983	3.60298	0.0576762	0.411437
Ces1c	-13.8056	5.44058	3.59739	0.0578703	0.412049
Ddx49	1.025	4.45614	3.59589	0.0579226	0.412149
Olfm4	2.93734	2.93229	3.59308	0.0580207	0.412303
Serpinc1	-9.24532	4.09448	3.59326	0.0580142	0.412303
Blvrb	1.77424	10.1449	3.59071	0.0581034	0.412347
Zfp273	-2.03756	2.35785	3.59175	0.0580672	0.412347
Churc1	-1.03552	3.54033	3.58908	0.0581605	0.41248
Nck1	-0.811986	4.97287	3.58714	0.0582283	0.41269
Asf1b	1.18897	3.75684	3.58396	0.05834	0.413209
Rpl19.ps11	1.1151	2.86015	3.5741	0.0586874	0.413806
Ccdc186	-1.11835	3.98342	3.57264	0.058739	0.413806
Sltm	-0.677387	6.24661	3.57225	0.0587528	0.413806
Ccm2	0.655904	6.63566	3.57308	0.0587234	0.413806
Gsto1	-1.0136	5.87512	3.57926	0.0585053	0.413806
Fam118b	-0.911607	4.39504	3.57542	0.0586407	0.413806
Pim1	0.851393	7.70245	3.57563	0.0586332	0.413806
Lmbrd2	-2.18254	1.99683	3.57438	0.0586774	0.413806
Csnk1d	0.740512	6.55317	3.57177	0.0587697	0.413806
Trpm7	-0.773232	5.7979	3.56956	0.0588478	0.413815
1700021F05Rik	-1.46597	2.9863	3.56985	0.0588378	0.413815
4930581F22Rik	-0.996485	4.20109	3.56372	0.0590552	0.414193
Icam2	1.10797	6.30203	3.56433	0.0590335	0.414193
Esyt1	0.736418	7.58362	3.56616	0.0589686	0.414193
Rad1	-0.94675	3.95278	3.56437	0.0590323	0.414193
Aldoa.1	0.802823	8.06904	3.56095	0.059154	0.414617
Tubb5	0.813276	8.00377	3.55876	0.059232	0.414887
Srsf10	-0.752635	6.11461	3.55771	0.0592695	0.414887
Gimap8	-0.675879	7.30894	3.55509	0.0593632	0.415105
Gk	-0.967636	4.88718	3.55468	0.0593777	0.415105
Map2	3.16386	1.09162	3.55318	0.0594313	0.41521
Irgm2	1.58665	5.17577	3.55179	0.0594812	0.41529
Mrpl57	-0.823757	3.9397	3.545	0.0597251	0.415464
Pcmtd1	-0.840935	6.28446	3.53825	0.0599686	0.415464
Zfp931	-1.72801	2.20621	3.54254	0.0598137	0.415464
Dexi	1.61863	1.66644	3.54541	0.0597104	0.415464
Ypel4	2.5105	3.48135	3.53886	0.0599466	0.415464
Capns1	0.714599	7.59657	3.54062	0.059883	0.415464
Zfp386	-0.994317	5.14379	3.53946	0.0599251	0.415464
Arhgap45	0.936929	8.62477	3.54447	0.0597441	0.415464
Tubb4b	0.76321	7.9433	3.54633	0.0596773	0.415464
Got2	-0.919917	5.43746	3.54987	0.0595499	0.415464
C2cd5	-0.85361	5.23697	3.54057	0.0598847	0.415464
Bgn	-4.13329	1.02232	3.53856	0.0599573	0.415464
Myzap	-3.54337	0.995088	3.53683	0.06002	0.415553
Rab23	1.99755	1.09483	3.53401	0.0601223	0.415994
Mss51	-1.85564	1.61078	3.5316	0.0602098	0.41621
Tyk2	0.750467	5.66991	3.53102	0.0602308	0.41621
Igfbp3	2.8305	1.02054	3.52548	0.0604325	0.417337
Fga	-12.6314	4.47633	3.52208	0.0605564	0.417422
Bspry	2.50141	1.98788	3.52352	0.0605038	0.417422
Itsn2	-0.587745	6.9866	3.52195	0.0605611	0.417422
Gm45418	-3.22683	1.38805	3.52005	0.0606305	0.417634
Ncaph	2.01172	4.08084	3.51854	0.0606859	0.417748
Col4a3bp	-0.688355	5.47131	3.51739	0.0607278	0.41777
Prdm10	-1.31144	2.99607	3.51539	0.0608014	0.418009
Gp9	1.61768	7.70965	3.51386	0.0608576	0.41813
Ddr1	2.32262	0.852654	3.50969	0.0610108	0.418262
Ctdsp1	-0.829308	4.41601	3.51128	0.0609524	0.418262
Mettl23	-0.776446	5.8476	3.50729	0.0610993	0.418262
Sema6b	2.7007	0.996569	3.50895	0.0610383	0.418262
Slc38a9	-0.781096	4.90437	3.50718	0.0611035	0.418262
Arhgap29	-1.93698	3.01148	3.50701	0.0611096	0.418262
Crbn	-0.738875	5.97093	3.50341	0.0612426	0.41864
Faap100	1.81552	1.31498	3.50423	0.0612122	0.41864
Lipg	2.83084	2.91337	3.50014	0.0613636	0.418826
Jdp2	1.83625	2.39926	3.49855	0.0614226	0.418826
Rdh7	-12.4119	4.02904	3.49743	0.061464	0.418826
Aldh18a1	0.890761	4.5397	3.49811	0.061439	0.418826
A130014A01Rik	-1.77825	2.65592	3.49793	0.0614455	0.418826
po1	-0.76339	6.51345	3.49633	0.061505	0.41884
Fgb	-13.2165	5.23447	3.48837	0.0618013	0.420592
Cutc	-1.13548	3.60939	3.48261	0.0620169	0.420898
Smox	1.66471	10.3096	3.48565	0.0619031	0.420898
Gm18853	1.61002	3.54057	3.48309	0.0619989	0.420898
Gsap	0.76933	6.07619	3.48311	0.061998	0.420898
Szrd1	0.736752	5.13562	3.48196	0.0620414	0.420898
Mrps17	-0.689995	5.17343	3.47323	0.0623695	0.422691
Rcn3	1.40208	2.38787	3.47284	0.0623842	0.422691
Cep68	-1.00342	3.88327	3.47118	0.0624467	0.422849
Nsd3	-0.653288	5.87103	3.46449	0.0626998	0.423389
Pex11a	-3.80868	0.872104	3.46423	0.0627098	0.423389
Prkce	2.24066	1.98815	3.46388	0.0627228	0.423389
Jpt1	0.935298	8.17243	3.46715	0.062599	0.423389
Rnf138	-0.948016	5.00978	3.4667	0.0626162	0.423389
Zmym6	-1.56984	2.95547	3.46097	0.0628333	0.423869
Tuba1b	0.852692	7.60816	3.45611	0.0630185	0.424115
Nfrkb	0.834577	4.29404	3.45897	0.0629093	0.424115
Zfp956	-1.35432	3.41595	3.45588	0.063027	0.424115
Ak3	-0.758335	5.54817	3.45619	0.0630152	0.424115
St8sia1	2.11229	1.28415	3.45436	0.0630853	0.424242
Klhdc4	0.953025	4.54541	3.44647	0.063387	0.424681
Smarca2	-0.855595	4.35438	3.44649	0.0633863	0.424681
Pvt1	-1.87193	2.23968	3.44721	0.0633586	0.424681
Zfp874a	-0.937325	5.48883	3.44907	0.0632873	0.424681
Rnf6	-0.634937	5.09267	3.44812	0.0633239	0.424681
Cs	0.715453	5.38789	3.44799	0.0633286	0.424681
Haus4	1.03113	4.06392	3.44511	0.0634393	0.424767
Dennd1b	-0.690803	5.26502	3.44272	0.063531	0.425117
Cdk14	-2.01117	1.72225	3.43912	0.0636697	0.42527
Ifi205	1.44057	5.61779	3.43857	0.0636907	0.42527
Metap1d	-1.05372	3.91172	3.43719	0.0637438	0.42527
Trpv2	0.778208	5.76318	3.43701	0.0637511	0.42527
Gm12258	-1.66954	3.49361	3.43701	0.063751	0.42527
Usp46	1.17978	4.18653	3.43558	0.0638062	0.425374
Zfyve21	-1.89666	1.72551	3.43117	0.0639767	0.425722
Ap2s1	0.945455	4.78522	3.43151	0.0639636	0.425722
Pin1	0.988749	4.29544	3.43261	0.0639209	0.425722
Tmem154	-0.667049	5.48366	3.42759	0.0641157	0.425858
Sco1	-1.22542	3.29208	3.42783	0.0641063	0.425858
Rad17	-0.652066	4.77939	3.42789	0.0641039	0.425858
Smim24	1.98775	1.88831	3.42417	0.0642487	0.425954
Fgl1	-10.5464	2.45095	3.42573	0.0641879	0.425954
Cldn13	2.51567	4.82677	3.4242	0.0642475	0.425954
Slco1b2	-8.91226	1.63178	3.41746	0.0645103	0.427425
Tsen2	-1.91157	1.37398	3.41318	0.0646776	0.42827
Fnta	-0.651141	5.68577	3.41067	0.0647761	0.428659
Ap1s1	1.09973	3.96597	3.4085	0.0648614	0.428697
Gm8369	-0.971171	6.4188	3.40867	0.0648547	0.428697
Cacna1e	-1.02353	4.18384	3.40409	0.0650351	0.429319
Zcchc11	-0.732607	5.27391	3.40432	0.0650258	0.429319
Atp2a3	0.808236	6.70887	3.39836	0.0652611	0.429759
Coro1a	0.794122	9.32531	3.39912	0.0652314	0.429759
H2.T24	0.871576	6.77776	3.39906	0.0652337	0.429759
Gm30948	-2.20462	1.88735	3.39923	0.0652267	0.429759
Ccr2	-0.846829	8.1067	3.39395	0.0654358	0.430178
Cfi	-10.4202	2.28646	3.39374	0.0654445	0.430178
Cpne8	3.42018	1.05062	3.39404	0.0654326	0.430178
Slc25a46	-0.784206	5.0659	3.39038	0.065578	0.430792
1700037H04Rik	1.4471	3.54978	3.38805	0.0656706	0.430876
Armc7	0.912923	4.41091	3.38886	0.0656384	0.430876
Abl2	-0.945674	4.16345	3.38635	0.0657384	0.430895
Ssb	-0.724567	6.87791	3.38597	0.0657534	0.430895
Ofd1	-1.1181	3.67754	3.38487	0.0657974	0.430921
Ccs	1.16998	5.56371	3.38155	0.0659302	0.431528
A630023P12Rik	-1.3739	3.11751	3.38009	0.0659885	0.431594
Hdgfl2	0.858997	4.26438	3.37929	0.0660203	0.431594
Map3k14	0.988661	3.47498	3.37761	0.0660878	0.431774
Pidd1	2.52349	1.33435	3.37595	0.0661546	0.431948
Marcks	-1.01106	5.88134	3.37211	0.0663089	0.432694
Armc6	1.34643	2.22215	3.36934	0.0664206	0.43316
BC100530	-3.45749	1.10494	3.3658	0.0665633	0.433654
Pias2	-0.992405	4.39251	3.36547	0.0665767	0.433654
Thap12	-0.705898	5.30967	3.35664	0.0669346	0.433727
Cabin1	1.12197	3.27506	3.35704	0.0669182	0.433727
Spata24	1.81081	1.6493	3.35831	0.0668665	0.433727
Chd3	0.777142	5.0912	3.36312	0.0666715	0.433727
Frmd4a	1.24788	4.16617	3.36304	0.0666747	0.433727
Gm10180	1.86937	2.39522	3.35626	0.06695	0.433727
Zfp526	-2.43873	1.15568	3.35909	0.0668351	0.433727
Glyctk	-1.86553	2.46724	3.36172	0.0667285	0.433727
Pyroxd1	-1.1019	3.70873	3.35995	0.0667999	0.433727
Osbp	-0.600592	5.08808	3.34939	0.06723	0.434649
Cchcr1	2.26365	1.80805	3.34848	0.0672671	0.434649
Ppm1l	-1.9212	2.19585	3.34782	0.0672941	0.434649
Ccdc138	2.36988	1.60446	3.35173	0.0671344	0.434649
Rgs19	-0.653176	6.17718	3.34962	0.0672203	0.434649
Zfp955a	-2.29165	2.24201	3.34482	0.067417	0.435081
Tmem108	-1.32888	2.66111	3.34422	0.0674416	0.435081
Scaf11	-0.648216	5.78265	3.34007	0.0676118	0.435784
Scarb1	1.16878	4.48125	3.33959	0.0676315	0.435784
Gm26637	-2.22872	2.03206	3.33633	0.0677657	0.436389
Lpin2	0.94647	7.17958	3.32779	0.0681183	0.437092
Psmb5	0.929279	5.15185	3.33178	0.0679531	0.437092
Ptger4	0.830255	4.09782	3.33083	0.0679926	0.437092
D3Ertd254e	-2.12998	1.64718	3.32868	0.0680816	0.437092
Entpd5	-0.888902	5.06665	3.32886	0.068074	0.437092
Pdk3	0.750543	5.90055	3.32836	0.0680947	0.437092
Gm17435	2.17786	1.24683	3.32619	0.0681846	0.437257
Ikzf5	-0.967501	4.24445	3.31497	0.0686518	0.439992
Daxx	1.24505	3.37726	3.31224	0.0687656	0.440459
Lrrc32	2.65479	0.933899	3.3099	0.0688637	0.440826
Ptpn14	1.23378	4.47598	3.30633	0.0690134	0.441522
Pigr	-3.88107	2.89378	3.29861	0.0693387	0.442553
Rgn	-9.37329	3.05378	3.29956	0.0692985	0.442553
Mir703	-1.72671	1.77972	3.30082	0.0692452	0.442553
Arhgap11a	1.22106	3.65557	3.29904	0.0693203	0.442553
mt.Atp6	-1.65701	1.71854	3.29464	0.0695062	0.443359
Emp3	0.750423	6.54861	3.29067	0.0696747	0.443384
Calm2	-0.600904	8.19524	3.29095	0.0696627	0.443384
Orai1	1.07203	3.51486	3.29189	0.069623	0.443384
Tipin	-1.08876	4.39974	3.29251	0.0695967	0.443384
Rad52	-1.09617	3.06124	3.28524	0.0699055	0.443626
Pml	1.12545	5.33734	3.28697	0.0698316	0.443626
Gm10226	-2.48417	1.79205	3.28532	0.0699019	0.443626
Parp14	0.84384	7.85204	3.28845	0.0697688	0.443626
Cdk2ap2	0.787328	5.73123	3.28493	0.0699184	0.443626
Klhl18	1.10861	3.07729	3.28237	0.0700276	0.444057
Cyp3a11	-11.4134	3.67366	3.27902	0.0701709	0.444289
Agmo	-3.71334	2.14631	3.27862	0.0701877	0.444289
Laptm4b	-2.44642	2.28026	3.27907	0.0701687	0.444289
Pnp2	1.96786	3.90877	3.27698	0.0702581	0.444473
Apbb1	1.87893	1.33489	3.2734	0.0704115	0.445182
Ubxn6	0.773211	5.48938	3.27093	0.0705177	0.445592
Cyp27a1	-1.19611	4.51541	3.26406	0.0708136	0.445627
Mical1	0.78617	5.73109	3.26734	0.070672	0.445627
Lrif1	-0.981474	4.56255	3.26332	0.0708455	0.445627
Dpy30	-0.743179	4.88675	3.26313	0.0708538	0.445627
Rbl2	-0.765291	5.63999	3.2634	0.0708422	0.445627
Bhmt	-13.4738	4.99381	3.26378	0.0708256	0.445627
Zcchc7	-0.700061	5.71448	3.26313	0.0708538	0.445627
Bysl	1.33119	2.9037	3.26648	0.0707094	0.445627
Commd3	-0.996647	5.01238	3.26212	0.0708975	0.445641
Rlf	-0.634878	5.80536	3.2608	0.0709545	0.44574
Capn1	1.22712	3.52215	3.25918	0.0710246	0.445895
Ctsd	0.822757	7.73443	3.25832	0.0710619	0.445895
Abhd4	1.06681	6.65324	3.25558	0.0711806	0.446047
Rps29	0.924595	9.59233	3.2549	0.0712103	0.446047
Ahcyl2	-0.835317	5.05493	3.25647	0.0711419	0.446047
Gm43737	2.47478	1.31005	3.25178	0.0713459	0.446378
Harbi1	-1.00051	3.02929	3.25223	0.0713263	0.446378
Gabpa	-0.826886	5.2695	3.2428	0.0717381	0.447445
Rnf2	-0.858338	5.31643	3.24309	0.0717253	0.447445
Cbr4	-1.8747	3.25021	3.24217	0.0717656	0.447445
Gm14085	-1.1766	3.96295	3.24646	0.0715777	0.447445
Lilr4b	-0.820937	7.09276	3.24251	0.0717505	0.447445
Dtwd2	-2.43763	1.78448	3.24332	0.0717154	0.447445
Eva1b	1.58698	1.24171	3.24017	0.0718532	0.447733
4930503L19Rik	-1.35221	3.10857	3.23542	0.072062	0.447998
Zscan12	-1.5628	2.04417	3.23713	0.0719864	0.447998
Lhpp	-2.03305	2.24859	3.23548	0.0720591	0.447998
Ccdc62	-1.91895	1.58028	3.23642	0.0720178	0.447998
Rpl35a.ps2	-1.73134	1.95334	3.23422	0.0721146	0.448066
Acacb	-3.51647	0.934134	3.22973	0.0723127	0.449039
Dpy19l1	0.794074	5.2102	3.22744	0.0724137	0.449149
Ddx54	0.974433	4.87007	3.22784	0.072396	0.449149
Rbm14	1.14156	3.76299	3.22375	0.0725772	0.449904
Ces3a	-12.3289	3.97327	3.22104	0.0726974	0.45039
Ppp1r8	0.667597	5.14444	3.21863	0.0728046	0.450794
Kifc1	1.64802	2.198	3.21539	0.0729489	0.451429
Zfp638	-0.744308	6.23348	3.21367	0.0730255	0.451644
Atg4a.ps	2.10388	2.00456	3.21064	0.0731608	0.452221
Slc3a2	1.02571	7.66829	3.20853	0.0732551	0.452544
Ccl6	-0.76183	8.89338	3.20526	0.073402	0.453192
Usp19	0.729533	5.5521	3.2036	0.0734761	0.45339
Cps1	-11.1112	3.24774	3.20127	0.0735811	0.453517
Stab1	-2.39158	1.81985	3.20093	0.0735965	0.453517
Slc2a1	1.06169	3.62342	3.19941	0.0736649	0.453517
Rapgef5	-1.80493	2.80192	3.19982	0.0736465	0.453517
Topors	-0.761687	4.79616	3.19826	0.0737166	0.453576
Btrc	1.82608	1.83044	3.18945	0.0741149	0.453853
Zfp367	-1.65743	3.29208	3.17856	0.0746104	0.453853
Stxbp6	-1.94158	1.68175	3.17776	0.0746472	0.453853
Qk	-0.705546	5.94532	3.17697	0.0746832	0.453853
Lcn4	-2.00267	2.13649	3.19199	0.0739997	0.453853
Zfp280c	-1.13401	3.4011	3.19252	0.0739758	0.453853
Tmem167	-0.718249	5.82734	3.18288	0.0744133	0.453853
Ptger3	-3.36671	0.639356	3.17544	0.0747531	0.453853
Myo1g	0.794011	7.19929	3.17454	0.0747944	0.453853
Plekhm1	0.965626	3.98643	3.18611	0.0742664	0.453853
Atp11b	-0.756796	6.10052	3.18148	0.0744771	0.453853
Pdik1l	-1.11643	3.76009	3.18739	0.0742083	0.453853
Rp2	-0.85349	5.98164	3.19463	0.0738805	0.453853
Txnrd2	1.85666	8.716	3.17854	0.0746115	0.453853
Rph3al	2.39301	3.32273	3.18486	0.0743232	0.453853
Arhgap9	0.600776	7.08143	3.17958	0.074564	0.453853
Grn	1.4325	2.85488	3.18189	0.0744586	0.453853
Btnl10	1.9769	4.00496	3.18847	0.0741593	0.453853
Ttyh2	-3.64182	0.814384	3.17865	0.0746065	0.453853
Cntln	-1.14797	2.49276	3.18952	0.0741118	0.453853
rcc2	1.46717	1.69854	3.17631	0.0747134	0.453853
Ino80dos	-2.27258	0.844324	3.19565	0.0738342	0.453853
Man2b2	1.01799	3.9602	3.18025	0.0745332	0.453853
BC025920	-1.51163	2.06062	3.17411	0.0748141	0.453853
Pds5b	-0.790337	5.10709	3.1754	0.0747551	0.453853
Actl6a	-0.808501	5.64223	3.16643	0.0751666	0.453948
Trp53rka	1.05112	3.13624	3.1672	0.0751312	0.453948
Cdc34	0.770485	5.6343	3.17197	0.0749122	0.453948
Itgb2	0.728967	7.71248	3.16735	0.0751242	0.453948
Mzt1	-0.940793	5.43719	3.17138	0.0749393	0.453948
Stag1	-0.689881	5.81366	3.16663	0.0751573	0.453948
Serp1	-0.714661	8.75748	3.16853	0.0750701	0.453948
Eif2b1	-0.753999	4.57901	3.16727	0.0751281	0.453948
Ly6a	0.989058	8.73259	3.16408	0.075275	0.454347
Rps27l	-0.890618	5.95552	3.1627	0.0753387	0.454477
Cdc6	1.88827	3.25491	3.15972	0.0754763	0.455053
Galnt4	-1.11783	3.72911	3.1587	0.0755232	0.455081
Usp6nl	-0.835428	4.06718	3.15614	0.0756417	0.455541
Serpinb1a	-0.765434	6.72324	3.15461	0.0757128	0.455574
Dld	-0.611782	5.4514	3.1542	0.0757318	0.455574
Scn1b	2.57952	1.93387	3.15035	0.0759106	0.456157
Ap5s1	0.963007	3.18181	3.15029	0.0759133	0.456157
Samsn1	-0.662206	6.48968	3.14548	0.0761377	0.456996
Klk8	0.68044	4.44503	3.14561	0.0761314	0.456996
Naaa	0.737709	6.10855	3.14413	0.0762007	0.457119
Glud1	-0.638277	7.64206	3.14316	0.0762458	0.457136
Cd274	0.928037	5.70442	3.141	0.0763472	0.457489
Csk	0.677705	6.7731	3.13505	0.0766261	0.458905
Lyrm1	-2.18567	2.16114	3.13098	0.0768175	0.459541
Hhipl1	2.83532	0.166696	3.13152	0.0767922	0.459541
Pdk1	-0.737911	5.85238	3.12616	0.077045	0.460391
Rap2c	-0.720002	5.82047	3.12616	0.0770449	0.460391
Gm4610	-1.50124	1.83545	3.12366	0.0771632	0.460704
Itch	-0.580448	6.46524	3.12325	0.0771829	0.460704
Slc25a38	0.860512	4.54417	3.12052	0.0773123	0.460966
Plekhm2	1.43978	2.62888	3.12071	0.0773029	0.460966
Cep135	-1.15862	3.5185	3.11633	0.0775112	0.461353
Ttc17	-0.712608	4.22393	3.11558	0.077547	0.461353
F730311O21Rik	-1.2562	2.5306	3.11555	0.0775484	0.461353
Cdk1	2.0799	4.69288	3.11814	0.0774253	0.461353
Zfp36l1	-0.984311	6.07265	3.11437	0.0776046	0.461432
Rnaseh1	0.869187	3.65867	3.11295	0.0776722	0.46158
Stoml1	0.895554	4.58693	3.11145	0.0777436	0.46175
Nod2	2.41205	1.43179	3.11031	0.0777981	0.461819
Mical3	1.48895	3.61981	3.10895	0.0778632	0.461951
Bloc1s6	-0.712012	4.45465	3.10547	0.0780297	0.46243
Rom1	1.62545	3.21292	3.10632	0.0779889	0.46243
Gm43597	-2.66389	1.23805	3.10144	0.0782229	0.46332
Fcgr1	1.23356	5.35782	3.09943	0.0783198	0.46364
Borcs5	0.784733	3.79345	3.09701	0.0784361	0.464073
ist	-0.761064	7.78136	3.09298	0.0786304	0.464232
Fgl2	0.733957	7.70107	3.09406	0.0785784	0.464232
Wdr83	1.25703	3.15561	3.09503	0.0785315	0.464232
Was	0.585225	6.84442	3.09288	0.0786353	0.464232
Rars2	-0.825876	4.17183	3.09145	0.0787049	0.464389
Mapk8ip3	1.10015	4.06333	3.08998	0.0787757	0.464553
Hdc	1.15107	7.33442	3.08899	0.0788239	0.464583
Dip2c	-2.50823	1.46376	3.08514	0.0790103	0.464972
Cd33	-1.07412	5.68246	3.08535	0.0790002	0.464972
Acin1	0.781508	6.4873	3.08496	0.0790194	0.464972
Rapgef4	-1.11114	3.45732	3.07842	0.0793374	0.465337
Mocs1	1.27086	3.81654	3.07647	0.079433	0.465337
Cdc40	-0.585764	5.17715	3.077	0.0794067	0.465337
Angptl4	-2.82106	1.90161	3.07571	0.0794698	0.465337
H2.Q5	0.936537	4.97066	3.07639	0.0794367	0.465337
Trappc8	-0.683143	5.6547	3.07598	0.0794565	0.465337
Fam96b	1.18935	3.90809	3.08049	0.0792366	0.465337
Cxxc1	0.792896	4.6388	3.07679	0.0794173	0.465337
Trim23	-0.980357	4.00332	3.07962	0.0792789	0.465337
Arntl	-0.955562	3.7561	3.07393	0.0795569	0.465529
Man2a1	-0.74717	5.62586	3.07328	0.079589	0.465529
Trio	-1.68235	1.89715	3.07124	0.0796886	0.465858
Erich1	1.14019	2.38657	3.07023	0.0797383	0.465887
Crat	1.46746	6.69722	3.0681	0.0798429	0.465887
Gm10369	2.24429	1.60606	3.06936	0.079781	0.465887
Hip1r	0.836886	5.50905	3.06762	0.0798663	0.465887
Gzmm	1.83818	2.60627	3.06404	0.0800423	0.466207
Tmsb10	0.726027	7.09494	3.06387	0.080051	0.466207
Cdk7	0.692918	4.23434	3.06399	0.080045	0.466207
Mfap1a	-0.659734	5.04708	3.06188	0.0801488	0.466525
Trim68	-1.94148	1.67137	3.06032	0.0802256	0.466554
Rbm15	-0.91543	3.97083	3.0591	0.0802859	0.466554
Chaf1a	1.64602	2.51326	3.05828	0.0803268	0.466554
Dcxr	-1.60079	3.04849	3.05875	0.0803033	0.466554
Rps5	0.657434	9.70041	3.05465	0.0805062	0.467343
Snapin	-0.827178	5.01461	3.05322	0.0805772	0.467504
Fam214b	1.36526	7.92973	3.05106	0.0806845	0.467875
Atad5	-1.809	2.87033	3.04811	0.0808313	0.468474
Zfp317	-0.818469	4.66561	3.04622	0.080925	0.468522
Zfp950	-0.777404	4.84624	3.0462	0.0809265	0.468522
AW112010	1.02616	8.74465	3.04499	0.0809868	0.468619
Tmed7	-0.624181	6.22477	3.04386	0.0810429	0.468671
Utp11	-0.874368	4.53788	3.04306	0.0810827	0.468671
Mbl2	-11.4954	3.46026	3.03939	0.0812664	0.469054
Gm19261	-2.49815	1.7033	3.04024	0.0812239	0.469054
Kcnab2	0.80553	6.08688	3.03913	0.0812795	0.469054
Mrm2	1.66744	1.71678	3.03803	0.0813346	0.469121
Pde7a	-0.726428	6.01361	3.03629	0.0814218	0.469373
Gm14303	1.10043	3.07946	3.03509	0.0814823	0.46947
Malsu1	-1.05694	3.77026	3.03004	0.0817359	0.47068
Tbkbp1	1.34923	3.02207	3.02518	0.0819811	0.471162
Taok1	-0.598249	5.71862	3.02569	0.0819556	0.471162
Prtn3	2.51187	2.04926	3.02492	0.0819945	0.471162
Rabl6	1.17419	3.23905	3.0257	0.0819552	0.471162
Tnip2	0.723556	3.81564	3.02352	0.082065	0.471175
Rps6kb1	-0.632132	5.5672	3.02315	0.0820841	0.471175
Gtpbp6	1.35717	2.0583	3.0205	0.0822184	0.471193
Abhd17a	1.13444	3.69343	3.02081	0.0822024	0.471193
Rrm2b	-0.964392	4.46133	3.0205	0.082218	0.471193
Acly	0.624106	7.34372	3.01816	0.0823368	0.471233
Pear1	1.79316	1.82701	3.01668	0.0824122	0.471233
H2afz	0.601849	7.11069	3.01651	0.0824205	0.471233
Lrwd1	0.857761	4.55831	3.01605	0.0824439	0.471233
Fbxl4	-1.27722	3.3335	3.01889	0.0822996	0.471233
Gm12481	1.2943	2.10394	3.01187	0.0826569	0.471807
Marco	3.26404	6.66859	3.0116	0.0826707	0.471807
Zfp397	-0.889019	4.61877	3.0115	0.0826757	0.471807
Zc3h14	-0.559434	6.15327	3.00882	0.0828127	0.472095
Gm42870	-1.96896	1.64864	3.0088	0.0828137	0.472095
Mrpl16	-1.34728	3.61266	3.00747	0.0828818	0.472233
Nedd4	-0.848711	5.41482	3.00551	0.0829819	0.472305
Gmnn	1.37723	3.79797	3.00579	0.0829675	0.472305
Cnep1r1	-0.938145	4.15514	3.0031	0.0831056	0.472621
E2f2	1.33842	9.37358	3.00271	0.0831252	0.472621
Htt	0.750149	4.96673	2.99397	0.0835752	0.473981
4632432E15Rik	4.13407	1.68728	2.99612	0.0834644	0.473981
Trim41	0.769911	4.10976	2.99424	0.0835611	0.473981
Atp6v0b	0.781711	4.6885	2.99379	0.0835842	0.473981
Ccr3	-1.4578	4.46192	2.99464	0.0835404	0.473981
Gm6904	1.85982	1.85762	2.99021	0.0837693	0.474295
Ctu2	1.41091	2.8145	2.98932	0.0838155	0.474295
Cdc14b	-1.256	3.27665	2.98942	0.0838102	0.474295
Ap4s1	-0.675704	4.77599	2.99152	0.0837016	0.474295
Caprin2	-1.80866	1.57877	2.98844	0.0838608	0.474302
Parp9	0.722724	7.54953	2.9869	0.0839408	0.474506
Lrp4	-2.89303	0.792672	2.98235	0.084177	0.475342
Ier5	-0.650314	6.08621	2.98237	0.0841759	0.475342
Sema4b	0.990298	3.33426	2.9802	0.0842888	0.475475
Zbtb6	-0.879273	3.89541	2.98029	0.0842842	0.475475
Clip1	-0.704629	5.67208	2.97358	0.0846346	0.477176
Ppif	1.14144	3.73462	2.97249	0.0846915	0.477247
Cep250	1.08759	3.48499	2.96917	0.0848656	0.477729
Uhrf1bp1	1.20725	2.7615	2.96981	0.084832	0.477729
Csrp2	-1.73022	3.15402	2.96549	0.0850585	0.478316
Sh2d2a	1.16786	4.15305	2.96563	0.0850514	0.478316
Tfam	-0.713349	5.59394	2.96257	0.0852124	0.478923
Tldc1	1.17156	2.90689	2.96175	0.0852554	0.478923
Gm14325	-2.10371	2.23399	2.9597	0.0853638	0.479207
Slc16a1	1.0535	6.0933	2.95911	0.0853949	0.479207
Cep128	0.876132	4.90332	2.95441	0.0856436	0.480166
Ddx42	-0.663338	5.76915	2.9542	0.0856549	0.480166
Abhd13	-0.756921	4.79701	2.95312	0.0857119	0.480236
Nfia	-2.4755	1.0407	2.93879	0.0864754	0.480621
Apool	-0.831197	4.19286	2.94344	0.086227	0.480621
Agpat4	0.71739	4.14481	2.94572	0.0861055	0.480621
Dok3	0.960952	4.44495	2.93973	0.0864249	0.480621
Stag2	-0.666677	7.38737	2.94907	0.0859268	0.480621
Serpini1	-1.01954	4.11492	2.93795	0.0865203	0.480621
Tm9sf2	-0.588028	6.2924	2.9379	0.086523	0.480621
Casp6	-0.793627	3.85133	2.94284	0.0862591	0.480621
Tmem9	1.07809	3.35116	2.94653	0.0860624	0.480621
Hdac6	1.09904	2.43412	2.9469	0.0860423	0.480621
Abcf2	0.727119	5.14085	2.94306	0.0862472	0.480621
S1pr4	0.843785	4.21349	2.94937	0.0859109	0.480621
Tmem62	-0.964734	4.12985	2.94776	0.0859965	0.480621
Slc31a2	1.03977	4.9817	2.93692	0.0865755	0.480621
0610009B22Rik	-1.17357	2.50179	2.94115	0.0863491	0.480621
Mfsd14b	-0.684632	5.89437	2.94175	0.0863174	0.480621
Sirt7	0.702772	5.53557	2.94168	0.0863207	0.480621
Phactr3	-2.56723	1.12207	2.93678	0.0865831	0.480621
Gm41043	-3.64295	1.21807	2.93477	0.0866909	0.480971
Dmtn	1.7918	4.33143	2.93309	0.086781	0.481077
2007-03-01	-0.769855	6.20884	2.93107	0.0868899	0.481077
Ccdc91	-1.01699	3.2537	2.93027	0.0869331	0.481077
Slc4a1ap	-0.808737	4.52162	2.93137	0.086874	0.481077
Dr1	-0.832864	5.04425	2.93153	0.0868652	0.481077
Minos1	-0.878332	4.81422	2.92722	0.0870976	0.481347
Axl	1.24595	3.82304	2.92523	0.087205	0.481347
Kynu	-0.921641	3.90393	2.92542	0.0871947	0.481347
Slc2a8	2.03588	1.24649	2.92757	0.0870786	0.481347
Eif2ak2	0.851095	5.68039	2.92648	0.0871373	0.481347
Nampt	0.712341	7.00101	2.92346	0.0873003	0.481472
Ncaph2	0.658271	6.41758	2.92316	0.087317	0.481472
Epm2aip1	-1.13439	4.27901	2.92001	0.0874874	0.482147
Ube4a	-0.774619	4.40711	2.91924	0.0875289	0.482147
Slc7a11	-1.87344	3.07094	2.91761	0.0876177	0.482389
Card19	0.958789	4.24814	2.91629	0.0876893	0.482537
Sqstm1	0.944818	9.03148	2.91341	0.087846	0.482906
D8Ertd738e	0.719292	5.65523	2.91404	0.0878119	0.482906
Tnrc6a	-0.63266	5.27518	2.91007	0.0880282	0.483415
Zfp459	-1.64511	1.51708	2.91032	0.0880142	0.483415
Gm46224	1.99167	2.39093	2.90909	0.0880813	0.483461
Mgst2	-1.16685	4.42415	2.90552	0.0882768	0.483556
Gm29666	-2.50448	0.897958	2.90778	0.0881532	0.483556
Abca1	-0.886873	4.57182	2.90669	0.0882126	0.483556
Vezt	-1.22485	3.22702	2.9055	0.0882781	0.483556
Fignl1	1.50738	3.65587	2.90409	0.0883552	0.483714
Tmem68	-0.982575	4.26936	2.90333	0.0883967	0.483714
Acod1	1.3801	6.37699	2.90027	0.0885647	0.484005
Gramd1c	1.64866	2.97598	2.8999	0.0885849	0.484005
Maged1	-1.99197	1.77375	2.90144	0.0885004	0.484005
Ccdc126	1.47687	2.00968	2.89909	0.0886294	0.484005
Skil	-0.814737	5.05829	2.89749	0.0887177	0.484241
Crebrf	-0.627401	6.24425	2.8954	0.0888325	0.484622
Aifm2	1.99027	2.83754	2.89089	0.0890815	0.485094
Nr2c2ap	1.06244	3.15392	2.89064	0.0890954	0.485094
Snhg4	-1.67964	1.61573	2.89058	0.0890989	0.485094
Dok1	0.712121	5.49401	2.89101	0.0890751	0.485094
Sssca1	1.98147	1.29482	2.88828	0.0892259	0.485125
Tradd	1.10888	3.78966	2.88804	0.0892396	0.485125
Ptp4a1	0.940274	3.80189	2.88953	0.089157	0.485125
Ube2w	-0.876598	4.38985	2.88587	0.0893596	0.485288
Dhx38	0.809934	5.26911	2.88654	0.0893228	0.485288
Anxa8	2.31183	0.817039	2.8836	0.089486	0.48573
Mrpl17	-1.04473	4.23842	2.88262	0.08954	0.485778
Sphk2	1.53128	2.42278	2.87998	0.0896873	0.486332
pnpep1	0.695413	5.58761	2.87806	0.0897942	0.486667
Zdhhc13	-0.937511	4.52843	2.87724	0.0898398	0.48667
Ckb	1.42874	3.25284	2.87258	0.0901003	0.487836
Cdca2	1.63403	3.16646	2.86947	0.0902747	0.488535
Mmgt2	-1.04928	3.6822	2.86724	0.0903997	0.488966
Rps19	0.613507	9.34009	2.86564	0.0904896	0.489207
Sptan1	0.503024	7.34138	2.86483	0.0905355	0.489209
Tspan14	0.621326	6.08815	2.85965	0.0908272	0.48984
A430035B10Rik	-1.45562	2.17252	2.86111	0.0907451	0.48984
Pqlc3	-0.631308	5.24198	2.85947	0.0908373	0.48984
Rps15	0.702208	8.92511	2.8613	0.0907339	0.48984
[truncated: 8,781 more rows]

## Sheet: Py17XL_Late-Early
SYMBOL	logFC	logCPM	LR	PValue	FDR
Ltf	7.09495	6.68916	27.584	1.50416e-07	0.00162149
BC028528	-2.72972	4.69673	22.5298	2.06912e-06	0.00743504
Mmp8	3.79681	8.32599	22.8363	1.76401e-06	0.00743504
Adpgk	2.31619	5.01639	21.4979	3.54224e-06	0.00763707
Cd177	3.74228	5.29675	21.789	3.04334e-06	0.00763707
Cd69	1.90733	6.46436	20.8193	5.04725e-06	0.00769332
S100a8	3.171	11.4703	20.7428	5.2528e-06	0.00769332
Skint3	-5.85719	3.58201	20.5418	5.83431e-06	0.00769332
mt.Nd1	-2.72407	9.1978	20.3578	6.42299e-06	0.00769332
Camp	6.93693	4.95058	19.8741	8.27155e-06	0.00810612
Ccl6	-1.96683	8.89338	20.0299	7.62391e-06	0.00810612
Acod1	3.83044	6.37699	18.89	1.3848e-05	0.00995209
Hbq1a	-5.89504	6.35553	18.9199	1.36325e-05	0.00995209
Rpl36a	-2.08713	8.23045	18.9187	1.36409e-05	0.00995209
Dapk1	-2.86393	4.14151	19.0047	1.30399e-05	0.00995209
Trem1	2.55801	6.10704	18.0066	2.20143e-05	0.0148322
Ccr7	1.50204	5.8242	17.6384	2.67138e-05	0.0169397
mt.Cytb	-2.78987	9.73913	17.0078	3.72274e-05	0.0202069
Fam45a	-2.52375	4.92059	16.9944	3.74896e-05	0.0202069
Icos	2.42316	5.47235	17.0059	3.72639e-05	0.0202069
4930438A08Rik	8.19379	0.500292	16.4144	5.08984e-05	0.0261278
Hbb.bs	-5.03754	15.7103	16.1936	5.71877e-05	0.0273346
Lcn2	4.05426	6.40416	15.9243	6.59276e-05	0.0273346
Sh3bgrl	-1.79636	7.21231	15.9536	6.49142e-05	0.0273346
Fundc2	-3.40602	8.93337	16.1446	5.86867e-05	0.0273346
S100a9	2.67922	11.8728	15.9574	6.47849e-05	0.0273346
Gm28661	-3.0073	4.27124	15.7307	7.30298e-05	0.0291578
Ly6g	3.77561	4.9092	15.4823	8.32828e-05	0.0320639
Ngp	8.54918	4.87515	15.346	8.95083e-05	0.0326852
Itgb2l	5.57304	3.87743	15.2358	9.48853e-05	0.0326852
1810058I24Rik	-3.00853	9.77849	15.1937	9.70247e-05	0.0326852
Fpr2	2.1667	7.03406	15.2949	9.19665e-05	0.0326852
mt.Nd2	-2.7533	6.52748	15.1163	0.000101086	0.0330214
mt.Rnr1	-4.58515	9.28755	14.9496	0.000110419	0.0335898
Lag3	5.04516	3.09342	14.9199	0.000112174	0.0335898
Cox6c	-2.63717	8.49084	14.9455	0.000110661	0.0335898
1810022K09Rik	-1.80007	5.21504	14.7065	0.000125611	0.0365969
1110032A03Rik	-2.88403	5.66352	14.4983	0.000140284	0.0397963
Serpinb10	-3.25664	5.85693	13.9969	0.000183113	0.0492117
Cd83	1.82155	6.48958	13.9557	0.000187169	0.0492117
mt.Rnr2	-3.94733	11.8806	13.9633	0.000186414	0.0492117
Cdkn2d	1.43828	5.9416	13.7349	0.000210507	0.05403
Fpr1	2.07598	6.31785	13.6318	0.000222383	0.0557509
Axl	-2.84534	3.82304	13.5747	0.000229259	0.0561686
Mast2	-2.20107	4.18102	13.4762	0.000241613	0.0578799
Rpl11	-1.28185	9.388	13.2762	0.000268799	0.0629924
2310031A07Rik	6.94711	1.72057	13.0031	0.000310981	0.0713271
Ggt1	3.73982	3.33401	12.7805	0.00035026	0.0786625
Gm11575	-4.43016	4.0675	12.7412	0.000357688	0.0786914
Gzmb	3.04715	8.87718	12.6277	0.000380069	0.0819428
Yap1	-3.8091	3.79973	12.4451	0.000419084	0.0874504
Gm28437	-1.98168	5.25368	12.4329	0.000421839	0.0874504
Rpl31	-1.67951	9.90714	12.3696	0.000436382	0.0887584
Olfm4	6.12726	2.93229	12.3315	0.000445372	0.0889095
Ets1	1.35224	7.03937	12.038	0.000521281	0.0985862
Cntln	-3.0466	2.49276	12.044	0.000519601	0.0985862
S100a1	-1.88662	6.38529	12.1018	0.000503724	0.0985862
Aldh1a1	-3.18679	11.278	11.9582	0.000544079	0.101124
Gm33111	-3.79467	3.72821	11.8981	0.000561922	0.102275
Fam220a	-3.84095	12.9521	11.8521	0.000575952	0.102275
Rpl41	-2.45218	11.2923	11.8432	0.000578738	0.102275
Socs3	1.99652	5.19067	11.7917	0.000594955	0.103445
Ube2l6	-3.50736	14.0714	11.6974	0.000625887	0.103454
Nav1	-3.11881	2.55762	11.6989	0.000625379	0.103454
Rplp1	-1.74918	8.75721	11.6197	0.000652584	0.103454
Cgrrf1	-2.36025	4.30104	11.641	0.000645155	0.103454
Fam159b	-6.37248	3.55311	11.6385	0.000646019	0.103454
Clec4e	1.78316	7.03993	11.6206	0.000652259	0.103454
Capn1	2.38174	3.52215	11.4897	0.000699833	0.109336
Wfdc21	4.2284	5.6051	11.4374	0.000719811	0.11065
Rnase6	-1.24514	7.02218	11.4144	0.00072877	0.11065
Birc2	-1.9622	6.73642	11.2652	0.000789743	0.115046
Serpinb6a	-1.73979	7.16222	11.2799	0.000783519	0.115046
Sdcbp2	3.89	3.82932	11.2884	0.000779922	0.115046
Rec114	-4.15637	9.35962	11.2012	0.000817445	0.116152
Upp1	3.69989	5.76861	11.1954	0.000819986	0.116152
Gnb5	3.37322	1.30578	11.1737	0.000829654	0.116152
Rnf19a	1.45649	5.25605	11.1123	0.000857583	0.118522
Dap	-2.23769	6.58544	11.0709	0.000876941	0.119664
Fbxl5	1.23384	7.4724	10.7234	0.0010579	0.137399
Tgif1	1.29146	4.9751	10.7315	0.00105325	0.137399
Flot1	1.22311	5.45615	10.7247	0.00105717	0.137399
Cst3	-1.34105	8.47042	10.774	0.00102938	0.137399
Camk1	-1.3863	4.92678	10.6862	0.00107937	0.138519
Maml3	-4.78039	1.24323	10.6503	0.00110053	0.138788
Cd28	1.35092	5.46833	10.4945	0.00119733	0.138788
Mxd1	1.84615	6.69866	10.5562	0.00115799	0.138788
Bnip3l.ps	-4.01898	5.56495	10.5811	0.00114248	0.138788
Dhrs3	-1.80219	5.0345	10.5564	0.00115788	0.138788
Evi5	-2.27826	5.33458	10.5042	0.00119103	0.138788
Gm36981	6.49813	0.977955	10.5101	0.00118725	0.138788
Sec61g	-3.06468	12.7178	10.5542	0.00115925	0.138788
Tsc22d3	1.32924	8.30333	10.497	0.00119567	0.138788
[truncated: 10,687 more rows]

## Sheet: Py17XL_Early-Control
SYMBOL	logFC	logCPM	LR	PValue	FDR
[truncated: 10,780 more rows]

[truncated: 4 more sheets: PbANKA_Late-Early, PbANKA_Early-Control, PbNK65_Late-Early, PbNK65_Early-Control]
