# Supplementary material for: Comparative transcriptomic analysis reveals translationally relevant processes in mouse models of malaria
Source: eLife. 2022 Jan 10;11:e70763. doi: 10.7554/eLife.70763 (PMC8747512; doi:10.7554/eLife.70763)
Supplement: Supplementary file 3. [file elife-70763-supp3.xlsx]

## Sheet: Key
Supplementary File 3 Boldt et al 2019 Differential Expression Analysis without immune cell type adjustment
Table Column Names Key
Description: The results of the differential expression Analysis of the Boldt et al., 2019 microarray dataset without adjustment for immune cell type proportions as covariates in the differential expression design matrix.
Gene	Gene Symbols
Pvalue	p-value
FDR	false discovery rate corrected p-value
logFC	log fold change
Tab Names Key
CM	Cerebral Malaria
Healthy	Healthy
SA	Severe Anaemia
UM	Uncomplicated Malaria

## Sheet: UM-Healthy
Gene	Pvalue	FDR	logFC
CLC	7.07803e-10	9.56596e-06	-3.49858
G0S2	6.66403e-09	4.50322e-05	2.55573
S100A12	1.78964e-08	8.06235e-05	2.40657
VNN1	3.86144e-07	0.00101909	2.16798
PLBD1	3.84388e-07	0.00101909	1.39293
UBASH3A	4.52426e-07	0.00101909	-1.17027
LILRA3	6.4301e-07	0.00124147	2.49511
SYPL1	1.90348e-06	0.00132684	-0.591529
DYRK2	1.99873e-06	0.00132684	-0.622977
S100A9	2.03479e-06	0.00132684	1.36107
CD302 /// LY75 /// LY75-CD302	9.08717e-07	0.00132684	-1.25048
MMP9	1.42471e-06	0.00132684	2.91383
STAB1	1.16148e-06	0.00132684	0.888632
FCER1G	1.60586e-06	0.00132684	1.1151
BCL2A1	1.22956e-06	0.00132684	2.18773
HP	2.06168e-06	0.00132684	1.37793
CCR3	1.77606e-06	0.00132684	-2.11161
LRRN3	1.07314e-06	0.00132684	-0.99313
MIR6890 /// QARS	1.43937e-06	0.00132684	-0.956144
MS4A4A	1.35651e-06	0.00132684	2.34916
LDLRAP1	2.00158e-06	0.00132684	-1.21502
LEPROTL1	2.58664e-06	0.00158902	-0.583719
FCER1A	2.77693e-06	0.00163175	-1.28811
MYBL1	3.34269e-06	0.00188235	-1.13983
OPN3	3.49609e-06	0.00188999	-0.657323
HMGB2	4.58693e-06	0.00238432	1.21529
C1QA	5.12324e-06	0.00256446	2.06128
TMEM204	5.79076e-06	0.00279508	-0.913074
TTC3 /// TTC3P1	6.63885e-06	0.00309393	-0.684331
PTGDR2	7.01082e-06	0.00315837	-0.945654
RAB20	7.69563e-06	0.00335505	0.992324
C1QB	8.77413e-06	0.00349135	2.28772
LPXN	8.78328e-06	0.00349135	-0.719275
CD177	8.32404e-06	0.00349135	2.79768
RPS6KA5	9.3117e-06	0.00349577	-1.02361
TRBC1	9.19339e-06	0.00349577	-1.06326
TARP /// TRGC2 /// TRGV9	9.6654e-06	0.00353048	-1.31599
SMPD3	1.21599e-05	0.00432478	-1.36894
SRSF11	1.30971e-05	0.00453865	-0.733051
CROCCP2	1.36905e-05	0.00462568	-1.02514
RNASE6	1.44734e-05	0.00477093	-1.0548
CTSL	1.57453e-05	0.00483063	1.64249
HSP90AA1	1.52603e-05	0.00483063	1.32191
RBL2	1.59858e-05	0.00483063	-1.26118
ARHGEF18	1.60842e-05	0.00483063	-0.742191
GNS	1.64927e-05	0.00484562	0.909214
GSE1	1.74101e-05	0.00500634	-0.691099
MFHAS1	1.89346e-05	0.00522248	-0.823979
B4GALT5	1.86336e-05	0.00522248	0.937409
CCL5	2.20338e-05	0.0056014	-1.33091
MBNL1	2.12014e-05	0.0056014	-0.5803
ACSL1	2.10883e-05	0.0056014	1.46297
UQCRB	2.1813e-05	0.0056014	1.18185
HP /// HPR	2.23808e-05	0.0056014	1.45854
PRKACB	2.88758e-05	0.00597918	-0.788385
RABGAP1L	2.59562e-05	0.00597918	-0.72967
RTN1	2.74872e-05	0.00597918	-0.886272
VCAN	2.91991e-05	0.00597918	0.951856
IL1R2	2.74732e-05	0.00597918	2.18097
CEP68	2.73658e-05	0.00597918	-0.510041
LOC102724229 /// RASA4 /// RASA4B	2.61023e-05	0.00597918	-0.906365
LOC100129518 /// SOD2	2.82302e-05	0.00597918	0.783347
BCL11B	2.45844e-05	0.00597918	-0.859354
SLCO4A1	2.57273e-05	0.00597918	1.61901
SAMSN1	2.48679e-05	0.00597918	1.41219
C11orf21	2.89317e-05	0.00597918	-0.96139
NKTR	3.01377e-05	0.00603059	-0.557368
CCNG1	3.03426e-05	0.00603059	-0.620447
SLC35E2 /// SLC35E2B	3.12005e-05	0.0061001	-0.707815
PABPC1 /// RLIM	3.1595e-05	0.0061001	-0.692868
ADD3	3.32474e-05	0.00632871	-0.670765
BLCAP	3.40072e-05	0.00635504	-0.644552
HIST2H2BE	3.43262e-05	0.00635504	0.875363
SFT2D3 /// WDR33	3.5598e-05	0.00650145	-0.791188
HIST1H4E	3.61344e-05	0.00651142	0.66246
FABP5	3.96703e-05	0.00687491	1.33655
TCF4	3.96776e-05	0.00687491	-0.780298
CCR7	3.87007e-05	0.00687491	-1.14896
P2RY10	4.04694e-05	0.00688866	-0.747318
NDE1	4.09619e-05	0.00688866	-1.21453
SETD6	4.12861e-05	0.00688866	-0.65728
FCGR1B	4.33061e-05	0.00713758	1.87655
NLRP1	4.38503e-05	0.0071402	-0.620661
EVL	4.52212e-05	0.00727576	-1.04237
CLEC5A	4.63768e-05	0.00737391	0.831251
RPL14	4.87846e-05	0.00749232	-0.716364
BICD1	4.83758e-05	0.00749232	-0.66954
ZBTB20	4.82109e-05	0.00749232	-0.832809
PPARD	5.16649e-05	0.00775835	-0.617441
PLSCR3 /// TMEM256-PLSCR3	5.11948e-05	0.00775835	-0.790271
BST1	5.34834e-05	0.00786456	0.807718
CHMP7	5.3536e-05	0.00786456	-0.596677
NBPF10 /// NBPF12 /// NBPF14 /// NBPF15 /// NBPF20 /// NBPF8 /// NBPF9	5.56846e-05	0.00800615	-0.766519
PLEKHA1	5.55843e-05	0.00800615	-0.951963
PTER	5.66945e-05	0.00806554	-0.883833
NBPF10 /// NBPF11 /// NBPF12 /// NBPF14 /// NBPF15 /// NBPF20 /// NBPF8 /// NBPF9	5.87311e-05	0.00818932	-0.850245
TRAPPC12	5.87765e-05	0.00818932	-1.346
SLC2A14 /// SLC2A3	6.13178e-05	0.00845622	1.00475
GCC2	6.30135e-05	0.00851136	-0.769583
SSBP2	6.30509e-05	0.00851136	-0.797908
GLIPR1	6.42367e-05	0.00851136	-0.915609
SUV420H1	6.40929e-05	0.00851136	-0.621413
CPD	6.5615e-05	0.00860957	0.649651
CRISPLD2	6.74603e-05	0.00876659	1.01768
VPS51	6.90412e-05	0.00888659	-1.037
TMEM176B	7.00294e-05	0.00892874	1.75897
RASGRP1	7.09602e-05	0.00896287	-1.18483
FCGR1A /// FCGR1B /// FCGR1C	7.17957e-05	0.00898443	1.72914
FGR	7.31462e-05	0.00898701	0.774213
HCRP1	7.3105e-05	0.00898701	-0.550247
LAT	7.62463e-05	0.0092835	-0.827621
MICA	7.78345e-05	0.00939227	-0.910943
NFKB1	7.98886e-05	0.00955482	0.569747
MTHFD2	8.14879e-05	0.00966061	0.82004
POM121 /// POM121C	8.52477e-05	0.0100185	-0.872854
SATB1	8.72398e-05	0.0101642	-1.07985
ADAM28	8.97741e-05	0.0103701	-0.695101
TNFAIP6	9.14636e-05	0.0104035	1.94603
LILRB2	9.16029e-05	0.0104035	1.13775
NFATC2IP	9.2512e-05	0.0104192	-0.516955
SLC2A3	9.43441e-05	0.0105377	1.06584
ICAM1	9.61988e-05	0.0106568	0.842355
PRKCH	9.948e-05	0.0108425	-0.64952
SMPDL3A	9.93989e-05	0.0108425	1.57135
BTG1	0.000101916	0.0110191	-0.757909
HSPB1	0.00010566	0.0113333	1.67827
EGR1	0.00011226	0.0119464	1.05192
CALR	0.000122924	0.0123889	0.768241
LTF	0.00012141	0.0123889	2.21141
LMNB1	0.000125744	0.0123889	0.87084
ZWINT	0.000127009	0.0123889	0.695386
IL18R1	0.000125463	0.0123889	1.29256
VAMP1	0.0001202	0.0123889	-0.533987
LTB	0.000124022	0.0123889	-1.12417
TUG1	0.000118344	0.0123889	-0.516702
CBX7	0.000120737	0.0123889	-0.980623
ACACB	0.000127419	0.0123889	-0.424841
ZBTB44	0.000123135	0.0123889	-0.810483
PGAP3	0.000122278	0.0123889	-0.428629
S1PR1	0.000135852	0.0127869	-1.00187
CD24	0.000135349	0.0127869	-1.02592
FNBP1	0.00013615	0.0127869	-0.774012
DRAM1	0.00013516	0.0127869	0.85624
ANKRD36B	0.000136243	0.0127869	-0.521798
TCF7	0.000142962	0.013325	-0.742761
NDUFB3	0.000144154	0.0133441	1.1714
ZNF331	0.000146458	0.0133742	-0.566358
PSTPIP2	0.0001457	0.0133742	1.29534
ABLIM1	0.000153671	0.0134398	-0.96448
STOM	0.000167022	0.0134398	0.860702
IFI27	0.000163541	0.0134398	3.34745
ADM	0.000164518	0.0134398	1.00989
TERF2	0.000157549	0.0134398	-0.530529
RASSF1	0.00015354	0.0134398	-0.577307
KYNU	0.00016503	0.0134398	0.605799
MAL	0.000164556	0.0134398	-1.03648
ATP5I	0.000161139	0.0134398	0.820337
LOC101928189 /// RSRP1	0.000166625	0.0134398	-0.710656
ATP2B1	0.000159251	0.0134398	-0.708281
GATA3	0.000152793	0.0134398	-0.543326
DIDO1	0.000155708	0.0134398	-0.69593
SECTM1	0.000157389	0.0134398	0.97046
GUSBP3 /// GUSBP9	0.000160516	0.0134398	-0.796263
RBX1	0.000150289	0.0134398	1.27102
CCDC68	0.000162512	0.0134398	0.681153
EGLN2 /// RAB4B-EGLN2	0.000148503	0.0134398	-0.784696
LBH	0.000167065	0.0134398	-1.19379
STAG3L3	0.000160828	0.0134398	-0.557254
VEZF1	0.000169682	0.0135695	-0.584913
KCNJ15	0.000173215	0.0137706	0.999397
PHC2	0.000175215	0.0138481	0.663334
RIT1	0.00017668	0.0138828	0.52842
TMEM104	0.000177743	0.0138855	-0.717693
PFDN5	0.000188345	0.0146292	1.10037
HK3	0.000190197	0.0146886	1.26965
SWAP70	0.000197061	0.0151323	-0.43129
PDLIM1	0.000200172	0.0152843	-0.839099
CCR6	0.000205644	0.0156139	-0.660195
TCL1A	0.000208991	0.0157794	-1.03893
FTH1	0.000218466	0.0161343	0.703931
HLA-DPB1	0.000216227	0.0161343	-0.748152
DDHD2	0.000216545	0.0161343	-0.59384
HIST2H2AA3 /// HIST2H2AA4	0.000218118	0.0161343	1.24551
LY96	0.00022126	0.0162518	1.43591
TNFAIP8	0.000224509	0.0164013	-0.812594
LIMK2	0.000228973	0.0166217	0.849218
ATF7IP2	0.000230895	0.0166217	-0.870982
C6orf48	0.000231216	0.0166217	-0.66415
GOLGA6L4 /// GOLGA6L5P /// GOLGA6L9 /// LOC102724093	0.000233128	0.0166705	-0.561587
BAG5	0.00023765	0.0169044	-0.443709
ECE1	0.000246145	0.017417	0.624195
ANXA3	0.000253898	0.0177992	1.54975
EHBP1	0.00025418	0.0177992	-0.483077
HSBP1	0.000257716	0.0179293	0.632981
CREB1	0.000258692	0.0179293	-0.455508
DDX24	0.000261555	0.0180353	-0.640053
ETS2	0.000266755	0.0181694	0.98752
AIM2	0.000266111	0.0181694	1.22768
FAM13B	0.000267534	0.0181694	-0.633336
SERTAD2	0.000269272	0.018196	-0.681701
RNF41	0.000278012	0.0183993	-0.803804
TRIM32	0.000279616	0.0183993	-0.501697
TGFBR3	0.000277815	0.0183993	-0.665103
MTF1	0.000275786	0.0183993	0.651786
NR1D2	0.000278639	0.0183993	-0.813148
FNBP4	0.000280447	0.0183993	-1.07564
ID3	0.000284596	0.0185813	-0.812346
GLYR1 /// SEPT6	0.000290231	0.0188581	-1.05902
N4BP2L1	0.00029454	0.0190465	-0.307739
PLOD1	0.000301048	0.0191918	0.508122
ORM1 /// ORM2	0.00030074	0.0191918	0.813305
HSF2	0.000300472	0.0191918	-0.385872
HLA-DMB	0.0003058	0.0192366	-0.543756
CEACAM1	0.00030602	0.0192366	0.994913
CLEC4E	0.000303804	0.0192366	0.925237
SAT1	0.000309502	0.0193654	0.864869
GAS6	0.000311442	0.0193969	0.535509
RAB8B	0.000313696	0.0194477	0.567168
TRA2A	0.000315559	0.0194739	-0.729726
CEBPA	0.000318958	0.0195107	0.821218
AGO3	0.000319044	0.0195107	-0.627119
MEF2C	0.000325969	0.0198445	-0.69514
TGFBI	0.000328956	0.0199365	-0.728538
KCNJ5	0.000337947	0.0202993	0.347862
PLAUR	0.000336801	0.0202993	0.616909
DUSP1	0.000344003	0.0204136	0.952566
FLT3LG	0.000341831	0.0204136	-0.902767
SERINC5	0.00034438	0.0204136	-0.946985
ASF1A	0.000346787	0.0204665	-0.626957
NMT2	0.000357045	0.0209803	-0.486839
RPS16	0.000367801	0.0215188	-0.736373
ANXA11	0.000373758	0.0216796	-0.714478
ITK	0.000373542	0.0216796	-0.942472
RP5-882O7.1	0.000378327	0.0218508	-0.442099
TES	0.000384152	0.0219992	-0.553511
HIST1H1C	0.000383031	0.0219992	1.02269
PHKG2	0.00038588	0.0220049	-0.833417
CS	0.000390876	0.0221033	-0.63659
SPCS1	0.000389336	0.0221033	-0.677983
ZNF14	0.000394758	0.0222298	-0.471988
ID2	0.000400226	0.0223515	-0.61909
BPGM	0.00039869	0.0223515	1.55416
EIF3F	0.000403246	0.0224274	-0.462228
PFKFB3	0.000407086	0.0225135	1.14619
ARG1	0.000408124	0.0225135	1.18483
TBC1D4	0.000419228	0.0228463	-0.623011
NCSTN	0.000415908	0.0228463	0.486837
OXR1	0.000418265	0.0228463	-0.716765
CLIC4	0.000425034	0.0230696	0.38357
FHIT	0.000428626	0.0231715	-0.588621
PUM2	0.000432965	0.0232432	-0.491907
TMCO1	0.000433391	0.0232432	0.551626
LEF1	0.000439548	0.0234802	-0.735978
TMEM106B	0.000450627	0.0239773	-0.719811
NDUFA1	0.000460269	0.0240666	1.33113
BCL6	0.000462264	0.0240666	0.736795
NCR3	0.000456031	0.0240666	-0.735631
SUB1	0.000458098	0.0240666	0.986854
GLTSCR2 /// SNORD23	0.000462991	0.0240666	-1.09824
RAB9A	0.000457094	0.0240666	-0.429342
IL16	0.000471753	0.0244281	-0.572832
PNRC1	0.000476696	0.0245899	-1.06152
ST6GAL1	0.000487066	0.0246728	-0.362013
ZNF140	0.000483327	0.0246728	-0.663406
SEPT9	0.000483864	0.0246728	-0.674595
SORT1	0.000487432	0.0246728	0.526601
KLF2	0.000487241	0.0246728	-0.815898
DGKA	0.000491223	0.024772	-0.46443
NUCB1	0.000494474	0.0248432	0.978376
CD79A	0.000498472	0.0249513	-0.791847
PDXK	0.000506504	0.0252598	0.676305
SH3YL1	0.000509089	0.0252954	-1.04507
MARCKSL1	0.000514723	0.0254168	-1.02558
FAS	0.00051687	0.0254168	0.821804
AQP9	0.000518245	0.0254168	0.957818
FBXL14	0.000519056	0.0254168	-0.718562
PCBP2	0.000523545	0.0255441	-0.537585
MBP	0.000533675	0.0259447	-0.608213
GBP2	0.00053851	0.0259947	0.701636
ATP6V1C1	0.000539732	0.0259947	0.466715
MORC2	0.000540475	0.0259947	-0.433087
LDHA	0.000570626	0.026239	0.69083
RBM5	0.000574939	0.026239	-0.549002
QSOX1	0.000593627	0.026239	0.914773
JAK1	0.000556185	0.026239	-0.71325
MYOF	0.000554242	0.026239	0.65589
OFD1	0.000584236	0.026239	-0.702236
HMOX1	0.000575935	0.026239	1.6481
FOXO4	0.000591494	0.026239	0.718963
ITGAM	0.000553584	0.026239	0.797293
MGAM	0.000585098	0.026239	1.50902
IL18RAP	0.000576593	0.026239	1.19363
MMP8	0.000581527	0.026239	1.26274
PRDX1	0.00058274	0.026239	0.761909
RGL1	0.000553558	0.026239	0.783713
MS4A1	0.000564009	0.026239	-1.00593
SEPT6	0.000580391	0.026239	-0.529283
RRAS	0.000590125	0.026239	1.28375
MT1E	0.000594091	0.026239	0.797037
GPX7	0.000547954	0.026239	-0.340341
IRAK3	0.000589218	0.026239	0.655845
CYFIP2	0.00058977	0.026239	-0.54579
TCRDV2 /// TRDC /// TRDC /// YME1L1	0.000584545	0.026239	-0.857525
COX7BP1 /// COX7BP1	0.000561334	0.026239	0.888277
PPA1	0.000580457	0.026239	0.626617
ZNF506	0.000593517	0.026239	-0.562597
CTSB	0.000604072	0.0264208	0.760286
GPRASP1	0.000603658	0.0264208	-0.65512
LRIG1	0.000602339	0.0264208	-1.10137
CAT	0.000607305	0.0264765	-0.799156
HLA-DMA	0.000615692	0.0267559	-0.705789
TGFBR2	0.0006214	0.0269174	-0.600056
HLA-DQB1 /// LOC101060835	0.000627421	0.0270914	-0.640299
GMFG	0.000634662	0.0273167	0.783109
RPL39	0.000642149	0.027419	0.552938
LILRB3	0.000642968	0.027419	1.15852
TCF7L2	0.000643124	0.027419	0.686578
ADCY3	0.000653831	0.0277007	0.622552
RPL36	0.000651968	0.0277007	-0.888495
TOMM20	0.00065659	0.0277307	-0.543929
NBN	0.000661564	0.0278537	0.641133
SYNJ2BP /// SYNJ2BP-COX16	0.000674893	0.0283266	-0.492497
CRIP1	0.000688011	0.0286107	-1.11606
TMEM176A	0.000687357	0.0286107	1.0876
SIDT1	0.000685544	0.0286107	-0.809465
CNIH4	0.000705741	0.0292579	0.994974
NBPF10 /// NBPF11 /// NBPF14 /// NBPF15 /// NBPF19 /// NBPF20 /// NBPF25P /// NBPF26 /// NBPF8 /// NBPF9	0.000713715	0.0293847	-0.55048
GCH1	0.000715321	0.0293847	0.676689
TENM3	0.000713579	0.0293847	0.492453
FKBP4	0.00071808	0.0294086	0.644563
WWP1	0.000722253	0.0294902	-0.542655
BACH2	0.000756966	0.0308145	-0.843202
ALMS1	0.000768741	0.0311457	-0.409965
PCDH9	0.000769712	0.0311457	-0.492254
RPL10A	0.000775239	0.0312757	-0.778101
SERPING1	0.000783818	0.0313411	1.14656
KLHL21	0.000783643	0.0313411	-0.954489
NEK2	0.000780053	0.0313411	0.539102
BCL3 /// MIR8085	0.000788156	0.0314216	1.10818
PEBP1	0.000792228	0.0314911	-0.752658
TMX4	0.000798885	0.0314947	-0.442021
LGALS2	0.000796159	0.0314947	-0.890051
MEAF6	0.000799309	0.0314947	-0.674699
RUNX3	0.000819324	0.0320676	-0.65419
FLOT1	0.000816548	0.0320676	0.659091
ARHGEF6	0.000820969	0.0320676	-0.678088
GOLGA8A	0.00084181	0.0326927	-0.611708
REPS1	0.000840791	0.0326927	-0.370416
CD99	0.000847239	0.0328093	-0.534714
DHRS3	0.000872529	0.0336921	-0.762866
ADORA3	0.000884288	0.0340489	-0.751254
COX7A2	0.000893299	0.0342981	0.744077
LILRA6	0.000906575	0.0347092	0.893562
ZNF83	0.000911499	0.0347992	-0.635535
EIF3L	0.000924007	0.0351094	-0.748443
KLF3-AS1	0.000924819	0.0351094	-0.398889
ITPR1	0.000942793	0.03566	-0.42791
CACNA2D3	0.000944601	0.03566	-0.61232
RPL15	0.000947495	0.0356696	-0.547437
KDM3A	0.000969074	0.0363807	-0.645911
INPP5B	0.000979906	0.036584	-0.383668
LOC101928747 /// RBMX /// SNORD61	0.000978821	0.036584	-0.775271
KHDRBS1	0.000992608	0.0367746	-0.350581
CTCF	0.000990603	0.0367746	-0.447235
PSMG2	0.000993172	0.0367746	-0.670906
PRDM14	0.00100065	0.0369501	0.90638
RPL32	0.00100433	0.0369737	-0.362784
TTC39A	0.00100676	0.0369737	0.359949
ARHGEF9	0.00102122	0.0374032	-0.387577
RIN2	0.00103904	0.0375534	0.800025
GRINA	0.00103425	0.0375534	0.96076
ZNF395	0.00103921	0.0375534	-0.851696
TIMM8B	0.00103789	0.0375534	0.875677
LTBP3	0.00103248	0.0375534	-0.780274
ZFP36L2	0.00104529	0.0376721	-0.696325
CSTA	0.00105106	0.0377633	1.09939
RGS17	0.0010534	0.0377633	0.536297
TMEM80	0.00105831	0.0378387	-0.467845
REV3L	0.00106618	0.0379194	-0.860814
CPVL	0.00106549	0.0379194	-0.471115
CTSD	0.00107051	0.0379422	1.15847
EIF3H	0.00107787	0.0379422	-0.680746
CYP1B1	0.00107654	0.0379422	0.74267
FAM134C	0.00108928	0.0379422	-0.69148
RP3-507I15.1	0.00108035	0.0379422	0.794284
CNOT7	0.00108895	0.0379422	-0.601576
TMEM45A	0.00108782	0.0379422	0.494532
RUNX1-IT1	0.00108908	0.0379422	-0.8047
IL11RA	0.001101	0.0379594	-0.754638
RPL23A /// SNORD42A	0.00109927	0.0379594	-0.40906
CDKN1B	0.00109325	0.0379594	-0.772121
PTPLB	0.00109932	0.0379594	-0.384323
ITPKB	0.00111316	0.0381198	-0.829664
IL7R	0.00111318	0.0381198	-1.22503
HINFP	0.00111416	0.0381198	-0.75124
METTL3	0.00111694	0.0381198	-0.575073
ZNF274	0.00113411	0.0384594	-0.473554
NAMPT	0.00113078	0.0384594	0.9831
RNASET2	0.00113543	0.0384594	-0.698084
RP11-209A2.1	0.00114909	0.0388248	-0.823821
PRRG4	0.00116716	0.0393371	0.617923
PABPC1	0.00117316	0.0394408	-0.469578
RPL26L1	0.0011833	0.0396833	0.762936
GPR183	0.00120018	0.0401496	-0.705861
KLHL9	0.00120316	0.0401499	-0.329946
NFIL3	0.00121626	0.040487	0.758457
VNN2	0.00122009	0.0405149	0.952244
LHFPL2	0.00122526	0.0405868	0.749165
RPL13A /// SNORD32A /// SNORD33 /// SNORD34 /// SNORD35A	0.00123969	0.0409644	-0.715131
BIN1	0.0012471	0.0410086	-0.387062
CCRL2	0.00124514	0.0410086	0.834003
PADI4	0.00129726	0.0425545	0.647443
HSPE1	0.00131566	0.0428462	0.771244
STAT3	0.00131361	0.0428462	0.604571
GIMAP6	0.00131289	0.0428462	-0.867329
MALT1	0.00131972	0.0428749	-0.483863
COX7B	0.00132311	0.042882	1.31784
PUM1	0.00133869	0.04318	-0.422672
GNA15	0.00133685	0.04318	0.606384
ATP6V1E1	0.00136693	0.0439858	0.603432
NME1	0.00138294	0.0443194	0.688249
FADS1 /// MIR1908	0.00138385	0.0443194	0.323463
ISG20L2	0.00139235	0.0444861	-0.4028
OLFML2B	0.00139569	0.0444876	0.44224
YY1	0.0014185	0.0450748	-0.373834
HNRNPA1 /// HNRNPA1L2 /// HNRNPA1P10 /// HNRNPA1P33	0.00142078	0.0450748	-0.740099
CDYL	0.00143281	0.0453499	-0.395038
LCK	0.00144144	0.0454405	-0.833681
OGT	0.0014424	0.0454405	-0.432473
PRKCB	0.00145675	0.0457486	-0.482547
REPIN1	0.00145895	0.0457486	-0.594224
BUB3	0.00150182	0.0468538	-0.562055
COX20	0.00149928	0.0468538	-0.566314
LILRB1	0.00150459	0.0468538	1.22142
CCNG2	0.00151849	0.0469621	-0.449606
STK39	0.00151797	0.0469621	-0.562816
SMAD7	0.00151503	0.0469621	-0.454928
ZNF91	0.00152787	0.0470368	-0.701588
TOP2B	0.00152524	0.0470368	-0.752939
NPRL2	0.00153321	0.0470938	-0.830526
RPLP1	0.00154327	0.0471816	-0.402984
WHAMMP2 /// WHAMMP3	0.00154654	0.0471816	-0.383478
RPL7A /// SNORD24 /// SNORD36A /// SNORD36B	0.00154359	0.0471816	-0.464491
KLRF1	0.0015509	0.047208	-0.917674
CCDC92	0.00159034	0.0482998	-0.621445
RNF44	0.00159702	0.0483941	-0.720111
CEP350	0.00160353	0.0484676	-0.498581
ORC3	0.00160662	0.0484676	-0.535817
NFKBIA	0.00162078	0.0487857	1.19114
KIAA0907	0.00163122	0.0489909	-0.542034
CKS1B	0.00163537	0.0490067	0.559937
RRP1	0.001643	0.0491265	-0.472104
GSTO1	0.00165479	0.0493697	0.775307
MCTP2	0.00166202	0.0494763	0.683166
VCAM1	0.00167265	0.0496832	0.637478
CD63	0.00167783	0.0497277	0.902065
C20orf24 /// TGIF2-C20orf24	0.00169608	0.0501586	0.516662
LAG3	0.00170931	0.0504391	1.02004
NDUFA10	0.00171303	0.0504391	-0.366598
NR3C2	0.001735	0.050975	-0.711484
SMAD4	0.00174081	0.0510348	-0.310086
RPL19	0.00175404	0.0512005	-0.532331
CYBB	0.00175081	0.0512005	0.467536
CD2	0.00175909	0.0512374	-0.779402
CORO1C	0.00176721	0.0513631	0.661145
DOK2	0.00178953	0.0519001	-0.884943
RPS4XP2 /// RPS4XP2	0.00180345	0.0521919	-0.643167
CLIC2	0.0018127	0.0523476	1.51365
EAF2	0.00181857	0.0524049	0.771421
POLM	0.00182918	0.0525986	-0.566772
UQCRH /// UQCRHL	0.00183445	0.0526383	0.652239
DNAJA1	0.00185533	0.0527386	0.701197
PAPD7	0.00186518	0.0527386	-0.404239
GOSR1	0.00186527	0.0527386	-0.480737
ACAT1	0.00184758	0.0527386	0.675893
EIF3K	0.00185946	0.0527386	-0.511768
CPSF7	0.00184928	0.0527386	-0.342912
TNIP2	0.0018648	0.0527386	0.351636
NEK4	0.00187461	0.0528923	-0.307339
SUCLG2	0.00188743	0.053143	-0.561642
SRGN	0.00190973	0.0535477	0.511814
DENND4A	0.00190605	0.0535477	-0.439716
LOC101930075 /// LOC102724993 /// NPIPA1 /// NPIPA2 /// NPIPA3 /// NPIPA5 /// NPIPA7 /// NPIPA8 /// PKD1P1	0.00191988	0.0537209	-1.89559
DHX15	0.00193843	0.0541278	-0.451949
CTSH	0.00195093	0.0542528	0.626501
SNRPD1	0.00195005	0.0542528	0.59331
LETMD1	0.00195737	0.0543201	-0.508617
KLHL3	0.00196637	0.0544581	-0.986669
DIEXF	0.0019716	0.0544912	-0.313893
TRAC	0.00197988	0.0546082	-0.813562
CAMLG	0.00200069	0.0549338	-0.597022
DBP	0.00200387	0.0549338	-0.475483
TRAC /// TRAJ17 /// TRAV20 /// TRDV2	0.00199705	0.0549338	-0.985535
RPS5	0.00202555	0.0551789	-0.550268
SLC43A3	0.00202489	0.0551789	0.452529
NSUN5P1 /// NSUN5P2	0.00202915	0.0551789	-1.00727
GIMAP1-GIMAP5 /// GIMAP5	0.00202174	0.0551789	-0.422445
IFNGR1	0.00206376	0.0560076	0.672884
GOLGA8N	0.00208404	0.0564446	-1.04255
BCL11A	0.00211247	0.0570999	-0.519944
LOC100508408 /// RPS13 /// SNORD14B	0.00212473	0.0573169	-0.537767
ZMYM6 /// ZMYM6NB	0.0021394	0.0575975	-0.477263
RNF24	0.00215431	0.0578836	0.706068
GYG1	0.00216281	0.0579967	1.08303
HMGB3	0.00217227	0.058135	0.57974
PTDSS1	0.0022252	0.0586376	-0.507449
UQCRQ	0.00222435	0.0586376	0.737212
FCAR	0.00220084	0.0586376	0.62036
SLC39A8	0.00221451	0.0586376	0.677892
TLR5	0.00221252	0.0586376	0.65401
PANK4	0.00222258	0.0586376	-0.41349
CNNM3	0.00221332	0.0586376	-0.426891
KLHL22	0.00222576	0.0586376	-0.25589
PLIN3	0.00223078	0.0586557	0.608264
HMGN4	0.00224665	0.058772	-0.682084
RPS2 /// SNORA64	0.00224825	0.058772	-0.705034
BTN3A2 /// BTN3A3	0.00224157	0.058772	-0.747887
CD163	0.00225571	0.0588531	1.21545
EZH1	0.00226698	0.0589197	-0.538987
FAIM3	0.00226376	0.0589197	-1.0283
CYFIP1	0.00227451	0.059002	0.639824
SLAMF8	0.00229772	0.0593762	0.517847
TLR8	0.00229384	0.0593762	0.916342
RBBP8	0.00230315	0.0594029	0.604873
LILRA1	0.00232477	0.0598463	0.628429
RETN	0.00233661	0.0600368	1.61745
DDX19A /// DDX19B	0.00234372	0.0601052	-0.690732
FRYL	0.0023561	0.0603082	-0.36195
TIA1	0.00238992	0.0609429	-0.477181
USP34	0.0023892	0.0609429	-0.362194
IL1B	0.00239645	0.0609945	0.82
IPO7	0.00241401	0.0613258	-0.369087
TK1	0.00243025	0.0616226	0.758434
CD6	0.0024521	0.0620601	-0.441291
CUX1	0.00246118	0.0621736	0.367391
UNC119B	0.00247537	0.0622992	-0.621614
TNFAIP3	0.00247517	0.0622992	0.893689
HNRNPA1 /// HNRNPA1P10	0.00252587	0.0634519	-0.531731
JMJD7-PLA2G4B /// PLA2G4B	0.00253171	0.0634806	-0.398126
MXD1	0.00254032	0.0635786	1.01628
NOL11	0.00256805	0.0641538	-0.357628
TRIM44	0.00259061	0.0644248	-0.35986
MCTS1	0.00259297	0.0644248	0.564454
SEMA4C	0.0025932	0.0644248	-0.470794
CTNNA1	0.0026049	0.0644935	0.406102
TIAM1	0.00260737	0.0644935	-0.476227
PIAS1	0.00261028	0.0644935	-0.468439
NPL	0.00263214	0.0649149	0.542994
RPL29	0.00265702	0.0649361	-0.746447
TIMP1	0.00264803	0.0649361	1.07409
HLA-DOB	0.00265436	0.0649361	-0.683324
LILRB4	0.00264556	0.0649361	0.554679
TM7SF3	0.00263931	0.0649361	-0.626708
CD200	0.00266859	0.0649982	-0.40546
ZCCHC8	0.00266918	0.0649982	-0.57775
RPL13A /// RPL13AP5 /// SNORD32A /// SNORD33 /// SNORD34 /// SNORD35A	0.00271932	0.0654642	-0.484771
NACA	0.00270022	0.0654642	-0.478565
RPL41	0.00270585	0.0654642	0.424872
DBI	0.00271715	0.0654642	0.907836
CAMP	0.00271286	0.0654642	0.8171
EXOC5	0.00271194	0.0654642	-0.512682
ASTE1	0.00272223	0.0654642	-0.935679
HNRNPA0	0.00274418	0.0657632	-0.465972
SMURF2	0.00275412	0.0657632	-0.722292
CCL23	0.00274947	0.0657632	-0.897364
PARP8	0.00274651	0.0657632	-0.576064
CLU	0.00277916	0.06616	0.587369
GLOD4	0.00278053	0.06616	-0.412441
FAM53B	0.00279384	0.0662095	0.465788
ADK	0.00280054	0.0662095	-0.453355
CD3G	0.00280221	0.0662095	-1.59381
LOC102723559	0.00278941	0.0662095	0.797637
PRDM2	0.00281375	0.0663661	-0.296869
TLE3	0.0028192	0.0663789	0.414189
CR1	0.00282822	0.0664755	0.49205
S100P	0.00285099	0.0667784	1.07723
CD96	0.00284923	0.0667784	-0.729855
ING1	0.00286002	0.0668739	-0.326949
GRN	0.0028995	0.0673633	0.855775
FXR2	0.00290322	0.0673633	-0.420422
H1F0	0.00289914	0.0673633	0.856726
PTRH2	0.00290587	0.0673633	0.475301
TMEM14B	0.00290302	0.0673633	-0.434779
CD9	0.00291274	0.067407	-1.21269
ENOSF1	0.00292842	0.0675366	-0.451646
CA4	0.00293333	0.0675366	0.902156
SLC38A1	0.00293207	0.0675366	-0.713422
ADA	0.00294234	0.0676075	0.690258
IPO9	0.00294642	0.0676075	-0.446252
AURKA	0.00299464	0.0684815	0.411257
LY9	0.00299027	0.0684815	-0.843261
SERPINA1	0.00300516	0.0686059	0.505646
MYOM2	0.00301037	0.0686089	-1.09515
UBL3	0.003021	0.0686305	-0.356647
CTNNA3	0.00302583	0.0686305	0.635764
MSANTD2	0.00302655	0.0686305	-0.566291
MAPKAPK2	0.00304941	0.0690331	0.309467
KDM4B	0.00305672	0.0690829	-0.488429
HLA-DRB1 /// HLA-DRB4 /// LOC100996809	0.0030653	0.0690982	-0.582252
HBD	0.00306762	0.0690982	1.09756
WIPF1	0.00307965	0.0691387	-0.413118
KCNF1	0.00307678	0.0691387	-0.48405
RHOH	0.00309938	0.0692611	-0.537189
PRRC2B	0.00310048	0.0692611	-0.793704
IGLC1 /// IGLV3-25 /// IGLV3-25	0.00309365	0.0692611	1.22234
RAB11FIP1	0.00310973	0.0693531	-0.623885
CDKN3	0.00313516	0.0697242	0.534193
LINC00341 /// SYNE3	0.00313669	0.0697242	-0.395121
MINA	0.0031528	0.0699674	-0.41073
KLF12	0.00316054	0.070024	-0.429593
IL10RA	0.00316603	0.0700309	-0.544999
CDC25B	0.00320817	0.0707985	-0.550291
ORC2	0.00321121	0.0707985	-0.580383
MIR4800 /// MXD4	0.00322728	0.071037	-0.650983
HS3ST1	0.00323797	0.0710408	-0.321838
NOP10	0.00323351	0.0710408	0.575048
TSPAN2	0.00324324	0.0710412	-0.315207
ETF1	0.00329087	0.0711617	0.410524
CEP170 /// CEP170P1	0.00326797	0.0711617	-0.494019
CD40LG	0.00328821	0.0711617	-0.774054
HIST1H4H	0.00325588	0.0711617	0.52843
VPS8	0.00328708	0.0711617	-0.508468
VPS13D	0.00328471	0.0711617	-0.400674
RNF4	0.00327068	0.0711617	-0.716884
GTPBP8	0.00328854	0.0711617	-0.537285
FBXO21	0.00331248	0.0715147	-0.333884
RBM12B	0.00332264	0.0716197	-0.607526
MED6	0.00333854	0.0718477	-0.366997
NELL2	0.00335125	0.0718922	-0.696413
TASP1	0.00334746	0.0718922	-0.589171
PTGDR	0.00337266	0.0722098	-0.360889
ATG3	0.00337673	0.0722098	0.516135
CELF2	0.00338549	0.0722826	-0.548866
VAC14	0.00339829	0.0724414	-0.345211
KIAA0391 /// PSMA6	0.00343702	0.0731517	0.549677
PDPK1	0.00344375	0.0731798	-0.484876
USP24	0.00345082	0.0732149	-0.36583
TXN	0.00347047	0.0735164	0.590659
CHEK1	0.00351396	0.0741476	0.297343
LY75	0.00351673	0.0741476	-0.710335
IPCEF1	0.00350588	0.0741476	-0.610107
PRSS23	0.00353709	0.0744607	-0.653625
GFOD1	0.00354981	0.0746123	-0.66802
LOC145783 /// ZNF280D	0.00356949	0.0749094	-0.525243
RUFY3	0.00358312	0.0749627	-0.319562
PDIA4	0.00358195	0.0749627	0.540479
GLRX	0.00360335	0.0752695	0.514517
SFI1	0.00361418	0.075379	-0.502481
SNRNP70	0.00362026	0.0753896	-0.28897
SCARF1	0.0036507	0.0757899	0.407783
RPS27L	0.00364974	0.0757899	0.891665
RPL13 /// SNORD68	0.00369473	0.0765862	-0.563829
RALGDS	0.00371466	0.0768815	-0.623164
CA1	0.0037384	0.0772546	1.26992
NME3	0.0037579	0.077539	-0.820705
TPP1	0.00377799	0.0775981	0.426148
BEST1	0.00377469	0.0775981	0.558499
NBPF1	0.00377171	0.0775981	-0.515203
SETD5	0.0037941	0.0778108	-0.457305
AGAP1	0.00381253	0.0778343	-0.415018
FPR2	0.00381218	0.0778343	0.892498
ZNF551	0.00380486	0.0778343	-0.40357
PRPF3	0.00381881	0.0778449	-0.664495
SNX29P2	0.003841	0.0781795	-0.71011
UBE2D2	0.00386838	0.0782667	-0.318287
NAP1L1	0.00385832	0.0782667	-0.432995
NPIPA1	0.00386845	0.0782667	-1.5442
EIF2AK3	0.00386601	0.0782667	-0.651437
RPL5 /// SNORD21	0.00390706	0.0785772	-0.359865
TXNIP	0.00389018	0.0785772	-0.837227
PRDX4	0.00390137	0.0785772	0.488214
ZNF512B	0.00390627	0.0785772	-0.411469
EXOC2	0.00394964	0.0791979	-0.739014
FBXO16 /// ZNF395	0.0039483	0.0791979	-0.874085
SLC4A7	0.0039676	0.0794401	-0.354208
KCNJ2	0.00398622	0.0796949	0.7172
ZNF443	0.00400772	0.0800064	-0.292747
IDS	0.00402051	0.0800254	-0.36015
RHOF	0.00401783	0.0800254	-0.655218
MZF1	0.00405853	0.0804506	-0.339668
KLHDC10	0.00405973	0.0804506	-0.364201
OR2H1	0.00405298	0.0804506	0.619094
ADAM9	0.00407312	0.0805976	0.742075
BEX4	0.00409616	0.0809351	-0.546428
BAG3	0.00414865	0.0817582	-0.619371
PITPNC1	0.00414992	0.0817582	-0.505413
NSUN5	0.00417591	0.0820112	-0.736539
IFITM3	0.00417616	0.0820112	0.784749
ZNF329	0.00418097	0.0820112	-0.365582
SFPQ	0.00419509	0.0821691	-0.57246
ADAM17	0.00421004	0.0823425	0.33051
PTK2	0.00422051	0.082428	-0.368324
TRIB1	0.00424873	0.0828594	0.924854
GZMB	0.00429748	0.0836893	0.982498
GNB2L1 /// SNORD95 /// SNORD96A	0.00433392	0.083831	-0.544308
PHB2	0.00434197	0.083831	-0.465094
CD55	0.00432137	0.083831	0.692138
CCL3 /// CCL3L1 /// CCL3L3	0.00432511	0.083831	0.806089
FBL	0.00431696	0.083831	-0.710281
TMEM134	0.00433633	0.083831	-0.536172
ENTPD1	0.00437911	0.0844274	0.389319
MAFF	0.00439223	0.0845598	0.583764
TCN2	0.00440531	0.0846911	0.679378
FOS	0.00442956	0.0850363	1.34847
MFSD12	0.00447975	0.0858779	-0.51012
RNF111	0.00457827	0.087642	-0.452675
SLC16A10	0.00458481	0.0876432	-0.583458
MPHOSPH9	0.00460151	0.0878382	-0.533425
PRKRA	0.00461538	0.0879786	-0.705606
RPL23AP32	0.00463847	0.0882942	-0.502288
AKR1B1	0.0046551	0.0884862	-0.510399
FNTA	0.00469664	0.0891016	-0.424039
SIK1	0.00470066	0.0891016	0.480107
MED13	0.00471013	0.089156	-0.55521
SPOP	0.0047177	0.0891745	-0.420523
PIK3R1	0.00473432	0.0893635	-0.553028
AKAP17A	0.0048235	0.0907933	-0.469236
ATP7A	0.00482216	0.0907933	-0.438561
NCLN	0.00484869	0.0911406	-0.328724
DCTN6	0.00486407	0.091176	0.485196
GGH	0.00486301	0.091176	0.609235
RRAGD	0.00488676	0.0914744	0.552165
SLC4A1AP	0.00493512	0.0922519	0.285469
ZSCAN18	0.00494538	0.0923161	-0.58232
RPS15	0.00498897	0.0928395	-0.464546
BLNK	0.00499403	0.0928395	-0.608745
GUCA1B	0.00498143	0.0928395	0.304933
IGHA1 /// IGHD /// IGHG1 /// IGHG3 /// IGHM /// IGHV4-31	0.0050086	0.0929825	0.716629
CDA	0.00501784	0.0930263	0.923876
PPP1R15A	0.00509918	0.0935269	0.978497
AASDHPPT	0.00508861	0.0935269	-0.430469
C14orf2	0.00509137	0.0935269	0.610353
MAPRE2	0.00510522	0.0935269	-0.407317
RASSF7	0.00507691	0.0935269	-0.528361
NOLC1	0.00507222	0.0935269	-0.400026
HMMR	0.00510424	0.0935269	0.517854
ITM2B	0.00506976	0.0935269	-0.624768
CAPRIN2	0.00510713	0.0935269	-0.665942
CDK1	0.00516298	0.0944217	0.474391
ARL4C	0.00518621	0.0946673	-0.464445
PTX3	0.00521843	0.0946673	0.62323
GAL	0.00519309	0.0946673	0.385095
CEACAM3	0.0052073	0.0946673	0.457643
KMT2A	0.00520716	0.0946673	-0.4304
CASP8AP2	0.00521369	0.0946673	-0.609583
TMEM168	0.0052266	0.0946883	-0.827891
HIST1H2BD	0.00523577	0.0947276	0.70078
MYB	0.00525242	0.0948893	-0.352414
IGH /// IGHA1 /// IGHD /// IGHG1 /// IGHG3 /// IGHM /// IGHV3-23 /// IGHV4-31	0.00525876	0.0948893	1.30605
ADARB1	0.00529705	0.0951565	-0.326625
TXK	0.00530173	0.0951565	-0.461532
EPHX2	0.00529673	0.0951565	-0.693151
SUN2	0.00529344	0.0951565	-0.610537
MED17	0.0053115	0.0952054	-0.45934
UPP1	0.00533485	0.0954974	1.12271
HIP1R	0.00534329	0.0955219	-0.458972
BST2	0.00537674	0.0958745	0.672059
LINC00652	0.0053772	0.0958745	-0.479555
MPPE1	0.0054014	0.0961236	-0.718417
OSBPL8	0.0054054	0.0961236	-0.466132
MIEF1	0.00545156	0.0964948	-0.269203
NPFF	0.00543896	0.0964948	-0.284681
TDRD3	0.00545483	0.0964948	-0.463159
ATM	0.00544134	0.0964948	-0.310258
PCSK5	0.00547169	0.0966665	-0.298303
DUSP8 /// LOC101927562	0.0054998	0.0970364	-0.439563
BDH1	0.0055203	0.097271	-0.562587
ATP6V1D	0.00556979	0.097909	0.58002
EBI3	0.005571	0.097909	1.06967
TGIF2	0.00559302	0.0981684	-0.401694
PEAK1	0.00560868	0.0983155	0.522801
NUP160	0.00563639	0.0986734	-0.358717
TAP1	0.00566381	0.099025	1.01605
RP11-54K16.2	0.00568938	0.0993437	-0.506366
MAPK14	0.00573293	0.09976	0.518298
COX17 /// POPDC2	0.00573537	0.09976	0.595772
CENPBD1P1	0.00573496	0.09976	0.356743
SLC22A4	0.00574756	0.0998436	0.791201
SGPP1	0.00576221	0.0999696	-0.468265
PPP1R2	0.00580136	0.100007	-0.317871
CYTH1	0.00577717	0.100007	-0.490503
PRKRIR	0.00579377	0.100007	-0.450767
METTL9	0.00580098	0.100007	0.739207
PJA1	0.00578833	0.100007	-0.556657
TFDP1	0.00584691	0.100536	0.584907
PLXND1	0.00584232	0.100536	0.285034
NETO2	0.00587333	0.100862	0.460534
CYLD	0.00588628	0.100956	-0.385115
BTN3A1	0.00596591	0.102192	-0.336459
EEF2	0.00598399	0.102372	-0.5901
THUMPD1	0.00606808	0.103548	-0.57318
SPHK1	0.00606274	0.103548	0.642253
RAB27A	0.00614739	0.104376	0.4267
NPAT	0.00614741	0.104376	-0.37628
ATR	0.00614746	0.104376	-0.478643
DENND1B	0.00613616	0.104376	-0.749842
P4HA1	0.00618406	0.104865	0.435893
TRAF3IP3	0.00619558	0.104929	-0.449995
EIF3D	0.00620919	0.105028	-0.530428
ARHGEF2	0.00622563	0.105174	-0.396038
ERBB2IP	0.00624734	0.105409	-0.428063
PIK3C2A	0.00625586	0.105421	-0.475794
TPCN1	0.0062857	0.105792	-0.431633
ACP2	0.00634507	0.106479	0.585703
KL	0.00635014	0.106479	0.382086
RNF38	0.00633812	0.106479	-0.323135
FCER2	0.00636812	0.106549	-0.283059
PID1	0.0063701	0.106549	-0.473427
CKAP4	0.00638604	0.106626	0.735198
PLAGL2	0.00639049	0.106626	0.311008
CTSO	0.00642507	0.107071	-0.460623
SLC35B1	0.00644692	0.107303	0.506363
TNFSF12-TNFSF13 /// TNFSF13	0.00647293	0.107603	0.48289
ZXDC	0.00648228	0.107627	-0.648084
PTPN4	0.00649477	0.107702	-0.515679
RRAS2	0.00650827	0.107793	-0.355296
BPTF	0.00657114	0.108436	-0.376565
PTEN /// PTENP1	0.00656332	0.108436	0.471433
MREG	0.00655537	0.108436	-0.279539
TTLL1	0.00662097	0.109125	-0.430541
CRELD2	0.00665437	0.109542	0.598827
USP4	0.00669052	0.109943	-0.33985
MLLT3	0.00670993	0.109943	-0.349847
CD8B /// LOC100996919	0.00670184	0.109943	-0.460768
ASXL2	0.00671128	0.109943	-0.524908
SLC16A7	0.00672512	0.110036	-0.691953
PSMD14	0.00675689	0.110289	0.577627
DCLK2	0.0067557	0.110289	0.394377
PBX3	0.00680255	0.110634	-0.552481
NRD1	0.00678908	0.110634	0.364781
C2orf43	0.00679497	0.110634	-0.266287
MYBL2	0.00685735	0.111124	0.760824
RPP40	0.00685398	0.111124	0.453713
SIL1	0.00685313	0.111124	0.952406
SLC39A1	0.00687398	0.11126	0.508479
WARS	0.00692482	0.111949	0.675518
RPLP2 /// SNORA52	0.00696598	0.112479	-0.698153
ARHGAP35	0.00704597	0.113635	0.276603
CDK2AP1	0.0070789	0.113947	-0.569356
MMD	0.00709811	0.113947	-0.607858
PYCRL	0.00709904	0.113947	0.372898
LOC101930075 /// NPIPA1 /// NPIPA2 /// NPIPA3 /// NPIPA5 /// NPIPA7 /// NPIPA8 /// PKD1P1	0.00709153	0.113947	-1.58749
CD247	0.00714681	0.114447	-0.916635
GPR97	0.0071471	0.114447	0.834159
HCRTR2	0.00718419	0.114769	0.523197
FAM169A	0.0071762	0.114769	-0.441333
PADI2	0.00721705	0.114872	0.602979
GLA	0.00720502	0.114872	0.591651
PPP1R17	0.00722466	0.114872	0.930298
TMEM126B	0.00721253	0.114872	0.438469
TRDV3	0.00724806	0.115109	-0.817492
NT5M	0.00727972	0.115341	-0.449501
MAK	0.0072748	0.115341	-0.575125
AP1S2	0.00731086	0.115428	-0.342746
ZNF12	0.00730908	0.115428	-0.441278
CUTA	0.00730619	0.115428	-0.57123
NFE2	0.00735676	0.115882	0.588867
BBX	0.00735633	0.115882	-0.669261
S100A8	0.00738473	0.115917	0.564277
RBP1	0.00737204	0.115917	0.51599
GPER1	0.00737776	0.115917	0.343321
SF1	0.0073968	0.115972	-0.562525
PNPO	0.00740873	0.116024	-0.39676
CD27	0.00745234	0.116169	-0.748953
KLRG1	0.00742805	0.116169	-0.414851
TFB1M	0.00745169	0.116169	-0.383377
DYM	0.00743748	0.116169	-0.43374
RNASE3	0.00746774	0.116275	-1.38721
CFLAR	0.00750239	0.11668	0.351797
ATP5J2-PTCD1 /// PTCD1	0.00754512	0.11721	-0.428787
AGL	0.00757343	0.117514	-0.538135
TRAT1	0.00760079	0.117804	-0.840482
JADE2	0.00764447	0.118345	-0.273765
ANAPC5	0.00766007	0.118451	-0.334758
AKAP9	0.00769727	0.11889	-0.282257
SEC24B	0.00777014	0.119333	-0.467963
ARHGDIG	0.0077698	0.119333	0.550871
LRCH1	0.00774677	0.119333	-0.638669
MILR1	0.00776376	0.119333	0.572768
COPZ1	0.00773674	0.119333	-0.444431
XCL1	0.00782049	0.119839	-0.361598
DOCK10	0.00782081	0.119839	-0.526683
LRP1	0.00783267	0.119865	0.45216
MIR4680 /// PDCD4	0.00790246	0.119865	-0.515779
FBXO11	0.00792223	0.119865	-0.380119
PPP2R5E	0.00785257	0.119865	-0.514822
ZNF292	0.00787928	0.119865	-0.48135
CDS2	0.00792894	0.119865	0.356898
IFNA5	0.00790017	0.119865	0.426917
PGK2	0.0078778	0.119865	0.389983
SNF8	0.00787814	0.119865	0.415148
TMEM161A	0.00791411	0.119865	-0.383177
ELP3	0.00789132	0.119865	0.48819
GMEB2	0.00792251	0.119865	-0.387348
SPIN1	0.008063	0.121636	-0.642384
SLC25A37	0.00806407	0.121636	0.744497
RPL12	0.00814853	0.122576	-0.365373
KIAA0930	0.00814407	0.122576	0.358418
WDFY3	0.00815358	0.122576	0.566987
BYSL	0.00816936	0.122677	0.60135
BIRC5	0.00820739	0.122969	0.35321
PRKD3	0.00821613	0.122969	-0.521518
MON2	0.00820794	0.122969	-0.29304
ZNF587B	0.00822811	0.123012	-0.405862
G6PC3	0.00824882	0.123185	-0.455277
SDCCAG3	0.00826992	0.123235	-0.658096
SLC15A3	0.00827034	0.123235	1.06153
CDC6	0.00828633	0.123337	0.330637
BMI1 /// COMMD3-BMI1	0.00833959	0.123799	-0.512042
ZBTB18	0.00834486	0.123799	-0.408046
IFFO1	0.00834272	0.123799	-0.359354
TRIM52	0.00836488	0.12396	-0.523561
DNMT1	0.00838423	0.124111	-0.444133
MED7	0.00839609	0.12415	0.404592
CTNND2	0.00840663	0.12417	0.397978
ERGIC2	0.00842217	0.124264	0.634334
SPOCK2	0.00851289	0.124767	-0.401566
ATF3	0.00856705	0.124767	0.597883
TARBP1	0.00854665	0.124767	-0.723453
UVRAG	0.0085501	0.124767	-0.305316
PPIP5K2	0.00852347	0.124767	-0.428495
TCEA2	0.00847285	0.124767	-0.499915
DZIP3	0.00854236	0.124767	-0.336014
LILRA5	0.00852128	0.124767	0.625701
UQCC1	0.00853277	0.124767	-0.641816
ARGLU1	0.00856031	0.124767	-0.579798
PDGFD	0.00848375	0.124767	-0.335198
EHBP1L1	0.0085053	0.124767	0.732072
FAM69A	0.00862516	0.125478	-0.314814
MRPL49	0.00867804	0.126111	-0.345338
OAT	0.00875625	0.126975	0.626315
ADRB2	0.00875348	0.126975	-0.60846
GRB2	0.00879321	0.127241	0.633559
DPEP2	0.00879344	0.127241	-1.12999
CCL4	0.00880936	0.127335	0.680855
SMYD2	0.00884001	0.127506	-0.503209
NUSAP1	0.00883163	0.127506	0.563084
KIR2DL4	0.00887134	0.127821	0.361435
ALAS2	0.00888581	0.127893	1.06655
OSGEPL1	0.00892634	0.12834	-0.498062
ESD	0.00894654	0.128494	-0.559814
ADCK3	0.00896339	0.128599	-0.552414
GPATCH8	0.00900968	0.129126	-0.388717
OGFR	0.0090303	0.129148	0.348959
ELOVL5	0.00902126	0.129148	-0.242911
PGLS	0.00911334	0.130197	-0.470189
TMA7	0.00915986	0.130724	1.0932
WDR82	0.00917924	0.130735	-0.53825
BLMH	0.00918663	0.130735	-0.485802
RNF208	0.00918966	0.130735	0.464127
LDHB	0.00924702	0.131333	-0.507927
CKS2	0.00925114	0.131333	0.698756
AMMECR1	0.00929412	0.131765	-0.338742
PVRIG	0.00930108	0.131765	-0.64252
SMCO4	0.00937447	0.132527	0.393609
EMILIN2	0.00936885	0.132527	0.583665
NBEAL2	0.00942569	0.133112	0.782922
RPA2	0.00950497	0.134092	-0.326752
ATP5E	0.00952954	0.134298	0.608222
GSTM4	0.00956489	0.134656	-0.414712
CASP1	0.00961502	0.135221	0.560756
ATP5A1	0.00963545	0.135367	-0.412284
BRD1	0.00969791	0.136103	-0.354211
PILRA	0.00971623	0.136219	0.558717
SRPK2	0.00973049	0.136277	-0.403763
RPL38	0.00975305	0.136452	-0.441402
GPR18	0.00976518	0.13648	-0.643912
MORC3	0.00979782	0.136795	-0.490535
TMEM110	0.00987867	0.137781	0.379597
DAXX	0.00991361	0.138126	-0.420146
KLHL2	0.00998064	0.138917	0.719998
SNRPG	0.0100074	0.139146	0.845599
USP32 /// USP6	0.0100282	0.139213	0.509957
ZCCHC24	0.0100328	0.139213	-0.367831
ATP5O	0.0100834	0.139503	0.416283
RYBP	0.010095	0.139503	-0.407975
RHCE /// RHD	0.010079	0.139503	1.06469
NDUFA4	0.0100892	0.139503	0.539006
TSTA3	0.0101451	0.140052	0.716556
CHKB	0.0101865	0.140337	-0.453321
RALGAPA1	0.0101846	0.140337	-0.338817
GTF2H1	0.0102117	0.140398	-0.419811
RHBDF2	0.0102097	0.140398	0.545013
ZBTB16	0.0102512	0.140798	0.483159
HEXA	0.0102645	0.140838	-0.490392
GAS7	0.0102916	0.140947	0.473045
ZNF304	0.0103038	0.140947	-0.455032
FUT4	0.0103015	0.140947	0.338558
DUSP3	0.0103401	0.141301	0.401148
LMF1	0.01036	0.141429	-0.269644
HLA-DPA1	0.0103882	0.141672	-0.531677
RPS24	0.0104087	0.141772	0.958377
PRMT2	0.0104167	0.141772	-0.303849
CDKN1A	0.0104281	0.141772	0.39366
NFX1	0.0104572	0.141772	-0.291768
GK3P	0.010439	0.141772	0.636329
NAA40	0.0104585	0.141772	-0.373216
TPD52	0.0104743	0.141845	-0.286313
HIST1H3E	0.010544	0.142503	0.453997
UBTD1	0.0105413	0.142503	0.499162
PDIA6	0.0105656	0.142652	0.613749
SRSF7	0.0106042	0.142926	-0.2629
RALB	0.0106071	0.142926	0.527258
TCF25	0.0106443	0.143232	-0.313746
NAA16	0.010651	0.143232	-0.508177
DYSF	0.0106909	0.143626	1.21164
SPEN	0.0107462	0.143796	-0.385206
PRKCZ	0.0107334	0.143796	-0.612397
TNIP1	0.0107415	0.143796	0.482526
COMMD3	0.0107168	0.143796	0.51656
GFAP	0.0107668	0.143931	0.582392
NRAS	0.0108221	0.144115	0.42137
ITM2A	0.0108173	0.144115	-0.745082
CXCR5	0.0108233	0.144115	-0.454986
ZNF277	0.0108005	0.144115	-0.380424
KCTD7 /// RABGEF1	0.0108791	0.144715	-0.375307
ERP29	0.0109179	0.144947	-0.522777
SLC25A6	0.0109106	0.144947	-0.671332
ATP2B4	0.0109542	0.145285	-0.264625
NUDT3	0.0110028	0.145788	-0.371801
SRRM1	0.0110936	0.146846	-0.440084
MYCBP2	0.0111109	0.146931	-0.619645
FBLN5	0.0111547	0.147136	-0.630334
POGZ	0.0111409	0.147136	-0.600232
PLEKHG3	0.011159	0.147136	-0.533157
MRPL22	0.0112069	0.147336	0.565672
ZNF587	0.0112045	0.147336	-0.417603
TMEM208	0.011186	0.147336	0.466113
CPNE7	0.0112229	0.147403	0.743583
HNRNPD	0.0112839	0.14763	-0.331583
EIF1AX	0.0112684	0.14763	-0.365838
RNF144A	0.0112607	0.14763	-0.755282
HGSNAT	0.0112801	0.14763	-0.679185
PRR5L	0.0113682	0.148589	-0.444079
PSIP1	0.011381	0.148612	-0.407234
BTAF1	0.0114161	0.148927	-0.385088
CABIN1	0.0114626	0.149019	-0.554573
NIPBL	0.0114783	0.149019	-0.402001
NOTCH2NL	0.0114747	0.149019	-0.898341
SCAI	0.0114695	0.149019	-0.374875
SMIM7	0.0114482	0.149019	-0.473907
TAF4	0.0115224	0.149179	-0.256969
HLA-DRA	0.0115237	0.149179	-0.499302
ZBED2	0.0115123	0.149179	0.355311
ZBED5	0.0115875	0.149717	-0.778485
SLC25A28	0.0115778	0.149717	0.41789
HMG20A	0.0116	0.149736	-0.425021
TTC37	0.0116206	0.149859	-0.347252
MEX3C	0.0116435	0.150011	-0.671145
SGK1	0.0116788	0.150045	-0.569555
CENPC	0.0116794	0.150045	-0.362981
CBLB	0.0116761	0.150045	-0.372905
RPA1	0.0117469	0.150641	-0.513342
ANO10	0.0117566	0.150641	0.527716
PDLIM2	0.0117593	0.150641	-0.603085
SH3GLB1	0.0118044	0.151076	0.48867
GNG10	0.0118189	0.151119	0.652839
ZNF652	0.011841	0.151258	-0.538752
RNF126P1	0.0118664	0.15144	-0.342561
FBXL7	0.0119134	0.151896	0.471532
MAN2A2	0.0119296	0.151959	0.420982
ATMIN	0.0119411	0.151962	-0.447867
MANF	0.0119915	0.152304	0.487003
PURA	0.0120554	0.152304	-0.28853
ATIC	0.0120578	0.152304	-0.398883
TRIM10	0.0120229	0.152304	0.418285
LRPPRC	0.0119969	0.152304	-0.304922
ARPP19	0.0120591	0.152304	-0.228817
WBP11	0.0120694	0.152304	-0.627296
C2orf42	0.0120338	0.152304	-0.403983
TSPYL1	0.012002	0.152304	-0.49467
SRP19	0.0121016	0.152568	0.519474
GORASP2	0.0121221	0.152684	-0.376511
PSMA3	0.0121407	0.152777	0.984072
GDE1	0.0121838	0.153175	0.472325
GM2A	0.0122143	0.153417	0.34981
TMOD3	0.012236	0.153546	0.411589
FHOD3	0.0122833	0.153997	0.537495
LILRA2	0.0123058	0.154136	0.744546
PLSCR1	0.0123535	0.154448	0.918278
ZNF280A	0.0123449	0.154448	0.536638
TATDN2	0.0124372	0.155064	-0.405577
SLC26A2	0.0124274	0.155064	-0.492422
KAT6B	0.0124168	0.155064	-0.329188
TELO2	0.0125163	0.155905	-0.298681
LINC00574	0.0125337	0.155978	0.864833
EPB41L3	0.0125777	0.156383	0.337828
CDK8	0.0125939	0.156418	-0.335669
HOXB5	0.0126037	0.156418	0.336488
SLC7A5	0.0126856	0.15729	0.811473
NAGA	0.0127276	0.157666	0.371192
MIR3916	0.0127897	0.15829	0.48316
CD28	0.0128515	0.158764	-0.314695
MBD5	0.0128499	0.158764	0.354283
PRSS50	0.0128769	0.158933	0.660957
TNFSF12 /// TNFSF12-TNFSF13	0.0128942	0.159001	-0.506994
LOC100127972	0.0129587	0.159651	-0.687758
NDUFA6	0.012995	0.159855	0.315991
SIN3B	0.0130081	0.159855	-0.254565
MDFIC	0.0130108	0.159855	-0.450095
RNMTL1	0.01307	0.160437	-0.356054
PTP4A2	0.0131127	0.160815	-0.315508
C11orf49	0.0131352	0.160944	-0.558213
CXCL6	0.0131677	0.161197	0.368663
ADPGK	0.0131958	0.161394	-0.475557
CLPS	0.0132608	0.162043	-0.504009
ARHGAP25	0.0132916	0.162126	-0.523892
C12orf29	0.0132843	0.162126	-0.553149
KMO	0.0133245	0.162381	0.361027
AGA	0.013367	0.162643	-0.259005
LSR	0.0133701	0.162643	-0.363596
STMN1	0.0135676	0.164868	0.39029
COX6C	0.0136506	0.164868	0.621275
CREBL2	0.0136309	0.164868	-0.379266
TERF1	0.0136059	0.164868	-0.46789
SF3A3	0.0136275	0.164868	-0.252584
H2BFS	0.0136104	0.164868	0.623336
TXLNGY	0.013645	0.164868	-0.730699
CASD1	0.0136052	0.164868	-0.331402
NFE2L1	0.0136644	0.164888	0.528654
LAIR1	0.0136793	0.16492	0.556507
ENY2	0.0137091	0.165132	0.798628
PNISR	0.0137453	0.165421	-0.410957
CHD9	0.013759	0.165438	-0.325299
FXYD5	0.0137757	0.165493	-0.416056
RP11-769O8.3	0.0137908	0.165526	-0.336033
MFNG	0.0139536	0.165928	-0.309046
IGSF6	0.013861	0.165928	0.611968
PIR	0.0139119	0.165928	0.33587
ATRX	0.0139553	0.165928	-0.184295
FYN	0.0139437	0.165928	-0.349331
MKI67	0.0139917	0.165928	0.436346
DESI1	0.0139853	0.165928	0.307087
PMS2P5 /// PMS2P9	0.0139864	0.165928	-0.328205
PLXDC1	0.0139107	0.165928	-0.355543
DIP2A	0.0139981	0.165928	-0.699688
LOC100996747 /// LOC101929876 /// RPS26 /// RPS26P11	0.0139199	0.165928	-0.607279
TIMM10B	0.0139911	0.165928	0.28535
URGCP	0.0138628	0.165928	-0.65613
CERS4	0.0139114	0.165928	-0.481085
FGF20	0.0140084	0.165928	0.247106
NHLRC2	0.0140292	0.166028	-0.377218
DSE	0.0140418	0.166032	0.489765
SFT2D2	0.014078	0.166314	0.435651
TNKS	0.0141092	0.166538	-0.292676
KDM5C	0.0141467	0.166541	0.414647
TCIRG1	0.0141653	0.166541	0.756232
ZNF124	0.01417	0.166541	-0.515659
ASMTL	0.0141834	0.166541	-0.445717
RNF34	0.0141528	0.166541	-0.358984
SERGEF	0.0141793	0.166541	-0.491043
AKAP12	0.014243	0.167096	-0.522962
FBXO28	0.014318	0.167387	-0.330074
KIAA0101	0.0143754	0.167387	0.382117
CTDSP2	0.0143307	0.167387	-0.380745
TRAF2	0.0143709	0.167387	-0.564111
ZNF324	0.0143534	0.167387	-0.687204
ASAH1	0.0143044	0.167387	0.390041
PHC1	0.0143681	0.167387	-0.550547
C12orf4	0.0143917	0.167387	0.396778
MSRB2	0.0143828	0.167387	0.625932
E2F8	0.0143319	0.167387	0.373364
STK19	0.0144231	0.167608	0.398137
VAMP5	0.0144421	0.167685	0.312836
LOC100505915	0.014461	0.16776	-0.323101
CACNG2	0.0145022	0.168094	0.562272
CSTB	0.0145741	0.168543	0.519553
COX11	0.0146033	0.168543	-0.219441
HEG1	0.0145985	0.168543	0.490254
AGFG1	0.0145885	0.168543	0.335665
SLC30A5	0.0145954	0.168543	-0.224519
NUP210	0.0146736	0.169038	-0.290667
MAFB	0.0146917	0.169038	0.817655
SDF2L1	0.0146962	0.169038	0.526074
CLEC7A	0.014676	0.169038	-0.91158
DIMT1	0.014749	0.169213	-0.345176
EGF	0.0147478	0.169213	0.399415
GALNT12	0.0147439	0.169213	-0.446323
TMEM51	0.0148342	0.170046	0.471825
HIST1H2AD /// HIST1H3A /// HIST1H3B /// HIST1H3C /// HIST1H3D /// HIST1H3E /// HIST1H3F /// HIST1H3G /// HIST1H3H /// HIST1H3I /// HIST1H3J	0.0148666	0.170273	0.574889
PSMA2	0.0148876	0.170369	0.318415
SAC3D1	0.0149273	0.170679	-0.638583
CKMT1A /// CKMT1B	0.0149618	0.170929	0.451198
SNRPN /// SNURF	0.0150384	0.171369	-0.331349
GIGYF2	0.0150318	0.171369	-0.340808
TAF1B	0.0150201	0.171369	-0.339042
NGLY1	0.0151326	0.172152	-0.44459
ARHGAP15 /// LOC101928361	0.0151253	0.172152	-0.434991
ZNF544	0.0151656	0.172383	-0.30283
OSBPL10	0.0151785	0.172384	-0.317031
AGRP	0.0152603	0.173168	0.619039
GGPS1	0.0153044	0.173479	-0.356651
RP3-406C18.2	0.0153174	0.173479	0.344901
WDR48	0.0153263	0.173479	-0.355124
OLFM4	0.015381	0.173953	1.33391
SIGLEC9	0.0154089	0.174123	0.905156
FGD2	0.0154238	0.174146	-0.345908
THBD	0.0155211	0.174808	0.359537
TRAF5	0.0155073	0.174808	-0.678152
PTGS2	0.0155213	0.174808	0.865679
DECR1	0.0155557	0.17505	-0.296364
PSG7	0.015622	0.175483	-0.528187
FBXO42	0.0156281	0.175483	-0.316491
ZNF43 /// ZNF729	0.0156331	0.175483	-0.437947
FLOT2	0.0156988	0.175686	0.537963
SMAD2	0.0156856	0.175686	-0.254603
SLC5A3	0.0157032	0.175686	-0.4006
WWC3	0.0156645	0.175686	0.501716
KCNA3	0.0157182	0.175709	-0.50015
HCAR3	0.0157976	0.17645	0.895737
PBK	0.0158213	0.176569	0.411644
CAPZA2	0.0158932	0.176787	0.652237
PRKX /// PRKY	0.0158668	0.176787	-0.376831
ACOT7	0.0158835	0.176787	0.354482
NDUFB2	0.015884	0.176787	0.45027
GLDC	0.0159492	0.176974	0.320985
URB2	0.0159421	0.176974	-0.400265
REEP4	0.0159258	0.176974	0.55819
ALDH1A1	0.0159871	0.177248	-0.3762
PRKY	0.016071	0.177998	-0.46609
AMELY	0.016081	0.177998	0.523064
SLC25A36	0.0161981	0.178063	-0.396761
TYMS	0.0162039	0.178063	0.319237
PSMA4	0.0161369	0.178063	0.691661
AK6	0.0161215	0.178063	0.573883
ENPP2	0.0161543	0.178063	0.713102
HCG18	0.0162003	0.178063	-0.457986
ZNF16	0.0162055	0.178063	0.344873
SYNC	0.0161432	0.178063	0.412276
P2RX2	0.0161167	0.178063	0.364797
EEF1G /// MIR3654	0.0162311	0.178199	-0.325654
RBBP7	0.0163169	0.178706	-0.401571
FTH1P5	0.0163068	0.178706	0.50635
LINC00339	0.0162927	0.178706	-0.329507
PYGL	0.0163605	0.179039	0.533496
POPDC3	0.0163945	0.179265	0.590423
NRIP1	0.0164227	0.179428	-0.500871
ATP5J	0.0164712	0.179813	0.696831
CARTPT	0.0164894	0.179866	-0.674637
CELF1	0.0165465	0.180199	-0.373398
JMJD1C	0.0165431	0.180199	-0.470069
DNASE1L1	0.016619	0.180676	0.460003
UBE2E3	0.0166305	0.180676	-0.547836
UGT1A1 /// UGT1A3 /// UGT1A5 /// UGT1A8 /// UGT1A9	0.0166048	0.180676	0.25661
COL16A1	0.0166579	0.180829	-0.423285
ZMYM4	0.0167038	0.180891	-0.259491
PLA2G16	0.0166911	0.180891	0.47768
USP19	0.0166913	0.180891	-0.460384
OPTN	0.0167942	0.181144	0.497194
NSG1	0.0167543	0.181144	-0.343734
MBD4	0.016789	0.181144	-0.34129
REV1	0.0167773	0.181144	-0.469629
LOC101928589 /// TMEM164	0.016791	0.181144	-0.397828
STRN	0.0168179	0.181255	-0.31647
LOC101060521 /// POLR3E	0.0169362	0.182385	-0.325636
CALU	0.0170127	0.182508	0.339368
POU4F1	0.0169632	0.182508	0.252583
ALPL	0.0169939	0.182508	1.07654
ACSF2	0.0169912	0.182508	-0.446206
ADAP2	0.0170151	0.182508	0.316115
NQO2	0.0170409	0.182639	0.5906
HERC1	0.0170947	0.182781	-0.394204
APOL2	0.0170688	0.182781	0.554732
HHLA1	0.0170908	0.182781	-0.694385
CAMK1D	0.0171355	0.183072	-0.665738
SEMA6A	0.0171922	0.183532	0.255127
JUN	0.0172337	0.183831	0.290814
STK17B	0.0172593	0.183959	0.407348
TGIF1	0.0173076	0.184281	-0.363735
PBXIP1	0.0173168	0.184281	-0.584652
DYNLT1	0.0173437	0.184422	0.689355
MOAP1	0.0173823	0.184687	-0.482861
GTF3A	0.0174016	0.184747	-0.418412
SRP14	0.0174346	0.184952	0.55793
APBA2	0.0174689	0.185171	-0.608309
ERLIN1	0.0175262	0.185633	0.496757
LOC100294145	0.0175487	0.185725	-0.396486
HMGN1 /// LOC101927733	0.0175996	0.185741	-0.406182
FLJ10038	0.0176052	0.185741	-0.33856
ADH5	0.017598	0.185741	-0.301136
SIGIRR	0.0175688	0.185741	-0.516339
SF3B1	0.0176833	0.185995	-0.494284
KDM5A	0.0176663	0.185995	-0.619207
PCNX	0.0176481	0.185995	0.273156
CBR4	0.0176981	0.185995	-0.381369
MYLIP	0.0176921	0.185995	-0.691347
NDUFB4	0.0177498	0.186393	-0.4301
IKBKB	0.0177955	0.186728	-0.269571
MEF2BNB	0.0179149	0.187689	0.382972
GABBR2	0.017902	0.187689	0.275085
CD53	0.0179446	0.187751	0.328537
ACSBG1	0.0179485	0.187751	0.238427
UBOX5	0.01799	0.187894	-0.360521
CMPK1	0.0179767	0.187894	-0.54224
PSPC1	0.0180435	0.188307	-0.326548
RAB11FIP2	0.0180871	0.188471	-0.304732
CLASP2	0.0180815	0.188471	-0.267229
TSPO2	0.0181777	0.189269	0.655708
CDKN2D	0.0182241	0.189462	0.335181
CSGALNACT2	0.0182243	0.189462	0.546353
GNL3L	0.0182573	0.189514	-0.194542
ATXN7L3B	0.0182513	0.189514	-0.306408
USP48	0.0182716	0.189517	-0.419655
RPS27A	0.0182959	0.189624	-0.53197
DPY19L1	0.0183275	0.189805	-0.431363
HOXB8	0.0183418	0.189809	0.360504
PLIN2	0.0183824	0.190083	0.493539
NFATC3	0.0184115	0.190238	-0.384703
RPS3A /// SNORD73A	0.0184876	0.190376	0.546079
ATF5	0.018476	0.190376	0.278094
LINC01278	0.0184953	0.190376	-0.234043
LZTFL1	0.018448	0.190376	-0.324275
SUV39H1	0.0184687	0.190376	0.293114
ARL2BP	0.0185738	0.190795	-0.349173
PLGLB1 /// PLGLB2	0.0185902	0.190795	-0.28266
GPD1L	0.0185924	0.190795	-0.614403
SNORA21	0.018561	0.190795	-0.636272
ZNF74	0.0186474	0.191213	-0.421863
SAP30	0.018675	0.191351	0.408294
AHSP	0.0187245	0.191713	1.15267
TMEM39B	0.0187623	0.191955	-0.339816
ABCG1	0.0188809	0.193007	-0.396829
BAIAP3	0.0189222	0.193007	-0.388737
ZFC3H1	0.0188976	0.193007	-0.307525
TIPIN	0.0189151	0.193007	0.458254
ALG13	0.0190042	0.193544	-0.300071
PCBP4	0.0190179	0.193544	-0.245383
MYH7	0.0189912	0.193544	-0.450903
KIAA0355	0.019104	0.193837	-0.375583
LAS1L	0.0191028	0.193837	-0.595559
AGPAT5	0.0191011	0.193837	-0.393483
FAM46A	0.019104	0.193837	-0.561271
CAPG	0.0192101	0.194767	0.485778
RRM2	0.0192465	0.194801	0.659423
TPST1	0.0192642	0.194801	0.345182
PIN4	0.0192991	0.194801	0.244276
YPEL1	0.0192964	0.194801	-0.55934
MARC1	0.0192852	0.194801	0.63289
ASPM	0.0192999	0.194801	0.694594
CHD1L	0.0193622	0.195283	-0.264862
IGHA1 /// IGHA2 /// IGHG1 /// IGHG3 /// IGHM /// IGHV3-23 /// IGHV4-31	0.0194549	0.196072	0.901082
SECISBP2	0.0194894	0.196274	-0.338811
ZNF500	0.0195502	0.196593	-0.387268
VPS13C	0.0195435	0.196593	-0.319136
SDHD	0.019595	0.196789	-0.370135
MAML1	0.0196277	0.196789	-0.33007
CUL5	0.0196522	0.196789	-0.296658
SFRP4	0.0196062	0.196789	0.367947
PRIM1	0.0196675	0.196789	0.402232
OLFML2A	0.0196716	0.196789	0.508899
C2orf49	0.0196645	0.196789	0.507452
MARCO	0.0197509	0.196854	1.27433
CXCR6	0.019728	0.196854	0.327026
RP11-395B7.7	0.019732	0.196854	-0.596315
TCEA1	0.0197018	0.196854	-0.35776
ZNHIT6	0.0197437	0.196854	-0.299899
OLAH	0.0198609	0.197804	0.337363
SIDT2	0.0199042	0.19809	0.582872
ARF1 /// MIR3620	0.0199897	0.198308	0.471449
SEC11A	0.0200259	0.198308	0.353065
IRF8	0.01999	0.198308	-0.416927
MAP3K7	0.0200289	0.198308	-0.209122
APLP2	0.0200159	0.198308	0.478006
PAK3	0.0199717	0.198308	0.356656
WDR6	0.0199478	0.198308	-0.368257
IFNGR2	0.0201309	0.198736	0.449283
PTTG1	0.0200886	0.198736	0.580556
PYROXD1	0.0201262	0.198736	-0.369043
MC3R	0.0201163	0.198736	0.313484
TLR4	0.0201735	0.199011	0.516452
KLRB1	0.0201923	0.199051	-0.595501
PPP1R3C	0.0202133	0.199113	0.452724
TAF1C	0.0202564	0.199392	-0.43387
PCMTD2	0.0202758	0.199438	-0.648329
TMEM41B	0.0203006	0.199537	-0.270284
BNIP2	0.020325	0.199631	0.573707
AUTS2	0.0203718	0.199946	-0.481929
RGS1	0.0204634	0.200428	0.380034
ZNF148	0.0204529	0.200428	-0.588065
ENOX2	0.0204655	0.200428	-0.279229
ARL3	0.0205839	0.201442	0.340862
ALDOC	0.020611	0.201561	-0.365912
FAM46C	0.0206704	0.201996	0.806316
NAIP	0.0207601	0.202726	0.576077
SEMA4A	0.0207806	0.202779	0.651144
CYP11B1	0.0208449	0.20326	0.336792
BCAS2	0.0209113	0.203468	0.376048
DDX28	0.0209026	0.203468	-0.209771
DPY30 /// MEMO1	0.020883	0.203468	-0.4332
NEO1	0.0209476	0.203674	-0.440192
ORM1	0.0210106	0.20414	1.09331
MAN1C1	0.0210648	0.20452	-0.469994
OR10C1	0.0210842	0.20456	0.412492
SERPINB6	0.0211709	0.205254	0.413022
CNPPD1	0.0212114	0.205499	0.74817
RPL18A /// SNORA68	0.0213259	0.205961	-0.535149
UBE2S	0.0213127	0.205961	0.815315
CHD1	0.0213352	0.205961	-0.618243
LYRM9	0.0213051	0.205961	-0.432077
NUP85	0.0213248	0.205961	-0.258613
PSEN1	0.0213715	0.206094	0.326755
C7orf55-LUC7L2 /// LUC7L2	0.0213947	0.206094	-0.374847
WDR19	0.0213877	0.206094	-0.595774
EIF5A	0.0214261	0.206249	0.410404
DNAL4	0.0215282	0.206643	-0.535485
NDUFS4	0.021487	0.206643	0.467648
PLEKHB1	0.0215239	0.206643	-0.596235
HIGD1A	0.0215263	0.206643	0.390063
BATF	0.0216585	0.207557	0.529585
TESPA1	0.0216694	0.207557	-0.578874
OR1D2	0.0216614	0.207557	0.623317
IGLC1 /// IGLV3-10 /// IGLV3-10	0.0217244	0.207936	1.55359
NEFH	0.021759	0.208061	0.33712
QRSL1	0.0217683	0.208061	-0.253267
PHF11	0.0218723	0.208908	-0.657309
ELAC2	0.0218977	0.209002	-0.400569
SLC25A11	0.0219288	0.209151	0.316617
HSD17B1	0.0220022	0.209703	-0.275822
VN1R1	0.0220229	0.209753	0.500191
PDP1	0.0221413	0.210732	-0.520734
CUEDC1	0.0222115	0.211252	-0.251044
RPL4 /// SNORD16 /// SNORD18A /// SNORD18B /// SNORD18C	0.0223529	0.211657	-0.49524
UNC13B	0.0222743	0.211657	0.565403
HAT1	0.0223515	0.211657	0.615474
IGHG1 /// IGHG2 /// IGHM /// IGHV4-31 /// MIR8071-1 /// MIR8071-2	0.0222911	0.211657	0.79611
LOC101928826 /// TPT1	0.0223316	0.211657	0.337371
MEGF9	0.0223638	0.211657	0.520538
TCRA /// TRAV21 /// TRAV21 /// YME1L1	0.0223455	0.211657	-0.430127
FKBP5	0.0223831	0.211692	0.519186
SAMHD1	0.0224451	0.21213	0.372381
LRCH3	0.0224755	0.212268	-0.293369
PXDN	0.0226895	0.213755	0.241017
IGHD	0.0226961	0.213755	-0.439312
RSL24D1	0.0226629	0.213755	0.593707
MICALL1	0.0226765	0.213755	-0.366427
ACP6	0.0227186	0.213817	0.551403
MERTK	0.02274	0.21387	0.232693
GBP1	0.0227838	0.214133	0.896622
CD14	0.0228579	0.21468	0.904394
EMC9	0.0229248	0.215159	-0.448392
NAPG	0.0230036	0.215599	0.430718
UBP1	0.0229921	0.215599	-0.309444
DLGAP5	0.0230497	0.215794	0.455442
MFF	0.0230564	0.215794	-0.318431
MRPS18B	0.0230838	0.215901	-0.421473
CRLF3	0.023153	0.216019	-0.416705
DAP3	0.0231571	0.216019	-0.697942
CAMK2G	0.0231604	0.216019	-0.470976
GPR25	0.0231558	0.216019	0.204887
DNAJC11	0.023241	0.216622	0.427293
SNX13	0.0232878	0.216909	0.225019
F5	0.0234289	0.218073	0.453388
MRAS	0.0234794	0.218261	0.291551
MLLT11	0.0234815	0.218261	-0.327831
TSPO	0.023578	0.218593	0.625521
ERCC3	0.0235383	0.218593	-0.553284
AKAP11	0.0235719	0.218593	-0.251162
IARS	0.0235819	0.218593	-0.674346
RASGRP3	0.0236152	0.218602	-0.441223
HSD17B7	0.0236025	0.218602	-0.334924
HOXD9	0.0236381	0.218664	0.361057
NBEAL1 /// RPL12	0.0236625	0.218741	-0.297778
PSMB6	0.0236831	0.218781	0.466178
IER3	0.0238675	0.220334	0.532165
ANKRD10	0.0239325	0.220784	-0.429846
HCP5	0.0239776	0.22081	-0.436031
LARP7	0.0239844	0.22081	0.298066
CHFR	0.0239673	0.22081	-0.313533
FOSL2	0.0240149	0.22094	0.477748
BCL2L1	0.0241382	0.221773	0.769863
KIZ	0.0241235	0.221773	-0.443418
YME1L1	0.0241612	0.221834	-0.222378
ANK1	0.0242333	0.222344	0.710134
POLR2G	0.0242958	0.222365	-0.310165
H2AFV	0.0242804	0.222365	-0.32533
RPS19	0.0243014	0.222365	-0.396632
RCBTB1	0.0242956	0.222365	-0.363489
AHCY	0.0243188	0.222374	0.272209
RP4-595K12.1	0.0243689	0.222681	-0.361411
USP9Y	0.0244213	0.223009	-0.442729
IGF2R	0.0244857	0.223446	0.516119
COQ4	0.024577	0.224129	-0.474347
UGT8	0.0246984	0.225084	0.53467
RNF11B	0.0247268	0.225191	-0.261234
ZNF7	0.0248083	0.225781	-0.238005
CXCL1	0.0248577	0.226078	0.3588
PLAGL1	0.0249978	0.226936	-0.331089
CTDSP1	0.0250108	0.226936	-0.458294
SIGLEC5	0.0249822	0.226936	0.666543
CYB5R2	0.0250192	0.226936	0.431227
ENO1	0.0250822	0.227202	0.465011
TCEAL4	0.0250662	0.227202	-0.442607
ICAM2	0.0251159	0.227203	-0.306277
HERC2P3 /// LOC101930458	0.0251069	0.227203	0.330074
SMARCA2	0.0251331	0.227207	-0.24965
RPL23A	0.0252734	0.227626	-0.527485
BMX	0.0252586	0.227626	0.90849
CTRB2	0.0252552	0.227626	0.331512
TRIAP1	0.0252308	0.227626	0.354239
SYNRG	0.0252403	0.227626	-0.381639
NXPH3	0.0252805	0.227626	0.519152
VPREB3	0.0252975	0.227627	-0.801807
ALOX5	0.0254255	0.228627	0.27149
CHST11	0.0254787	0.228952	0.499528
NUDT13	0.0255277	0.22924	0.387877
ANAPC15	0.0255811	0.229567	0.322817
SCNN1B	0.0257268	0.230722	0.494437
CSF1R	0.0257596	0.230832	0.486667
PHKG1	0.0257733	0.230832	0.514425
MAPK9	0.0258102	0.2309	-0.454192
PEX3	0.025815	0.2309	-0.26251
BPI /// LOC149684	0.0258681	0.231222	1.12827
C11orf63	0.0259333	0.231651	0.386473
DPP4	0.0259957	0.232056	-0.233865
SLC24A3	0.0260804	0.232658	-0.296836
MNX1	0.026137	0.233009	-0.292563
MRPL13	0.0261585	0.233046	0.451342
IFI30 /// PIK3R2	0.0262499	0.233327	0.769731
TLN1	0.0262844	0.233327	0.600184
F8A1 /// F8A2 /// F8A3	0.026283	0.233327	-0.428725
PHF21A	0.0262854	0.233327	0.488495
UGGT2	0.0262539	0.233327	-0.315419
RPL18P10 /// RPL18P10	0.0262935	0.233327	-0.605822
OR7E47P	0.0263536	0.233707	-0.372971
COLGALT2	0.0263758	0.23375	-0.325266
MDH2	0.0264281	0.233906	-0.239544
CDC42EP3	0.0264259	0.233906	0.409861
SIGMAR1	0.0265107	0.23418	-0.324951
RNASE4	0.0264995	0.23418	0.307356
ZNF571	0.026528	0.23418	-0.420825
SLC4A8	0.0265282	0.23418	-0.219849
IL13	0.0266124	0.234617	0.483184
RPL13A /// RPL13AP5 /// RPL13AP6 /// SNORD32A /// SNORD33 /// SNORD34 /// SNORD35A	0.0266095	0.234617	-0.509557
DSCC1	0.0266937	0.23518	0.217018
PEX11B	0.0267407	0.23544	-0.397278
TNPO1	0.0267778	0.235613	-0.317585
CLIC1	0.0267991	0.235647	0.53083
STK24	0.0268605	0.236034	-0.312687
EXOC3	0.0269442	0.236462	-0.669159
APOLD1 /// DDX47	0.0269377	0.236462	-0.281676
PPP1CC	0.0269757	0.236498	-0.530355
TNIK	0.0269834	0.236498	-0.235623
SLC22A6	0.0270444	0.236879	0.255282
COL18A1	0.0271118	0.237134	-0.325838
ANKHD1 /// ANKHD1-EIF4EBP3 /// EIF4EBP3	0.0271022	0.237134	-0.363451
VPS33B	0.0271261	0.237134	-0.383559
HLA-DQB1 /// HLA-DRB1 /// HLA-DRB3 /// HLA-DRB4 /// LOC100996809 /// LOC101060835	0.0271522	0.237209	-0.603239
ICE1	0.0272161	0.237613	-0.325037
BTD	0.0272949	0.238148	-0.310672
PDCD10	0.0273786	0.238723	0.697272
TOP2A	0.027399	0.238748	0.492135
MOCS3	0.0274176	0.238756	0.446676
RPL36A /// RPL36A-HNRNPH2	0.0274501	0.238786	0.830638
CD8A	0.0274564	0.238786	-0.482057
PITX2	0.0274813	0.238848	0.251724
CRYGC	0.027523	0.239057	-0.385911
MPP1	0.0275984	0.239559	0.986213
CCBL2	0.0276932	0.240121	-0.485305
LOC100996756	0.0276988	0.240121	-0.545359
SLC19A2	0.027852	0.241196	-0.390692
GLUD2	0.0278584	0.241196	0.286735
TRIM13	0.0279271	0.241501	-0.274778
STX11	0.0279294	0.241501	0.654162
WDR76	0.0281099	0.242649	-0.389119
ABCB4	0.028116	0.242649	-0.26716
TUBB4A	0.028094	0.242649	0.349105
ITGA4	0.0281766	0.242651	-0.350661
SLC6A6	0.0281544	0.242651	0.279389
TCR-alpha /// TRAV13-1 /// TRAV13-1	0.0281881	0.242651	-0.353543
APBB1IP	0.0281376	0.242651	0.548335
AKR1A1	0.0283746	0.243636	0.431714
PIGB	0.0283327	0.243636	-0.334237
FTL	0.0283646	0.243636	0.338347
SAR1B	0.0283619	0.243636	0.487476
SLC25A3	0.0284095	0.24378	-0.291994
NR3C1	0.0284365	0.243787	-0.29746
PIWIL1	0.0284644	0.243787	-0.237515
RAB15	0.0284581	0.243787	-0.303064
IDI1	0.0284944	0.24389	0.606685
CTSA	0.0285305	0.244044	0.875256
KDELR2	0.0285569	0.244116	0.230082
RYR1	0.0286443	0.244501	0.418758
CEACAM8	0.0286297	0.244501	0.811768
IBSP	0.0286562	0.244501	0.386612
RPS8 /// SNORD38B /// SNORD55	0.0286898	0.244539	-0.492152
NR1H3	0.028697	0.244539	0.382843
CLEC10A	0.0287561	0.244557	-0.37181
SLC1A7	0.0287462	0.244557	0.260448
PFKFB2	0.0287714	0.244557	0.322007
ANKRA2	0.0287275	0.244557	-0.340582
ZMYM2	0.0288287	0.24489	-0.30382
KIF1B	0.0288998	0.24534	0.574758
KIAA0226L	0.028941	0.245535	-0.464183
FCHSD2	0.0289613	0.245553	-0.402685
TCFL5	0.0291742	0.246824	-0.575382
SLC2A4RG	0.0291428	0.246824	-0.392325
C1orf35	0.0291842	0.246824	-0.340639
CLUHP3	0.0291484	0.246824	-0.584906
PAX1	0.0292278	0.247038	0.528065
SQLE	0.0292483	0.247057	0.314816
NKRF	0.0292947	0.247218	-0.367862
MICU1	0.0293298	0.247218	0.301233
SNX10	0.0293406	0.247218	0.453741
C17orf59	0.0293383	0.247218	-0.5194
RYK	0.0294079	0.247477	-0.311974
IGLJ3	0.0293988	0.247477	0.507431
ASMT	0.0294303	0.247511	0.245884
BSG	0.0294745	0.247729	0.917019
GEMIN4	0.0295007	0.247795	-0.252293
ATP2A2	0.0295321	0.247905	0.258038
PGLYRP1	0.0295986	0.248309	1.05778
CISD1	0.0296174	0.248312	0.388316
KCNQ1	0.0296408	0.248354	-0.407556
IST1	0.0297481	0.248945	-0.378196
SREK1	0.0297409	0.248945	-0.373417
PGD	0.0298094	0.249303	0.612427
RPAP3	0.0298361	0.249372	-0.300623
SIRPAP1 /// SIRPAP1	0.0298678	0.249483	0.580692
CREG1	0.0299209	0.249617	0.961772
TUBB3	0.0299559	0.249617	0.566992
KLRC4-KLRK1 /// KLRK1	0.0299762	0.249617	-0.47798
CCR9	0.0299619	0.249617	-0.306937
HLX	0.0299251	0.249617	0.570023
RELA	0.030003	0.249686	0.268952
ZKSCAN7	0.0300277	0.249738	-0.363138
BRD3	0.0301236	0.250381	-0.3374
PSMG1	0.0302781	0.250643	0.324859
SKI	0.03025	0.250643	-0.574514
MTMR11	0.0303	0.250643	0.519944
RPL5 /// SNORA66 /// SNORD21	0.0303405	0.250643	-0.2175
IGH /// IGHA1 /// IGHA2 /// IGHD /// IGHG1 /// IGHG3 /// IGHG4 /// IGHM /// IGHV3-23 /// IGHV4-31	0.030269	0.250643	0.879732
OR7C1	0.0303181	0.250643	0.327754
HMOX2	0.0302141	0.250643	-0.328354
SAV1	0.0302978	0.250643	-0.344018
LOC728392	0.0303368	0.250643	-0.484272
PEX26	0.030239	0.250643	0.278424
ARPC1A	0.0304879	0.25102	0.375465
HDDC2	0.0305319	0.25102	0.276176
AQP3	0.0304325	0.25102	-0.262774
ASGR2	0.030516	0.25102	0.429284
PPAP2A	0.0305347	0.25102	-0.285662
TYRO3	0.0305023	0.25102	0.373396
BANK1	0.0305311	0.25102	-0.582442
ABCA11P	0.0304279	0.25102	-0.379493
PLA2G1B	0.0305721	0.251175	0.348224
MTMR1	0.0306168	0.251389	-0.211977
ITGA2B	0.0307118	0.251863	0.715666
CEBPB	0.030695	0.251863	0.585633
ADCK4	0.0307826	0.252291	-0.248887
TMED9	0.0309057	0.253146	0.346644
MEN1	0.0309422	0.253292	-0.312658
VDR	0.0309918	0.253458	0.289783
DPYSL4	0.0310001	0.253458	-0.239957
ALOX5AP	0.031133	0.254391	0.665205
RFTN1	0.0311754	0.254583	-0.256034
COG2	0.0312414	0.254968	-0.298178
HSPD1	0.0314623	0.256184	0.515236
ENPP4	0.0314852	0.256184	-0.272157
SRGAP2 /// SRGAP2B /// SRGAP2C	0.0314198	0.256184	0.457189
WDR74	0.0314712	0.256184	-0.345136
LOC101928274 /// VSIG10	0.031433	0.256184	-0.307047
CD160	0.0315673	0.256698	-0.50639
LUC7L3	0.0316073	0.25671	-0.530053
NT5E	0.0316592	0.25671	-0.337819
ACADSB	0.0316638	0.25671	-0.28341
PSG11	0.0316186	0.25671	0.498635
S100PBP	0.0316415	0.25671	-0.366548
ESYT1	0.0317135	0.256805	-0.974113
MTO1	0.0317021	0.256805	-0.316115
IFIT3	0.0317336	0.256814	0.956847
GPR153	0.0318393	0.257516	0.401015
STK25	0.0318993	0.257538	-0.402367
CDC7	0.031863	0.257538	0.378906
BTN3A2	0.0318878	0.257538	-0.403662
ZBTB5	0.0320331	0.258418	-0.389608
SRRM2	0.0320465	0.258418	-0.292059
SH3BP5	0.032072	0.25847	-0.364065
DMRT1	0.0320914	0.258471	0.459367
PLXNA3	0.0323016	0.25918	-0.584189
KRIT1	0.032281	0.25918	-0.239637
RPS3	0.0322005	0.25918	-0.296894
TUBB4B	0.0323136	0.25918	0.463724
CRY1	0.0323121	0.25918	-0.429466
PIGG	0.0322764	0.25918	-0.389578
OR52A1	0.032238	0.25918	0.50469
ARIH1	0.032504	0.259861	-0.191304
LRBA	0.0324897	0.259861	-0.300992
RIC8B	0.0324423	0.259861	-0.467928
A4GNT	0.0324812	0.259861	-0.61841
LOC100507577 /// LONP2 /// SIAH1	0.0325139	0.259861	-0.375381
C9orf156	0.0324667	0.259861	-0.233378
SPTAN1	0.0326542	0.260828	-0.273106
ZNF862	0.0327083	0.261106	-0.460502
STK38	0.0327519	0.2613	-0.186287
SLC25A5	0.0328134	0.261636	-0.324922
STX3	0.0329183	0.262318	0.330124
MKL2	0.0329656	0.26254	-0.388198
UGGT1	0.0330544	0.263092	0.283392
FOSB	0.0331022	0.263317	0.593036
SLTM	0.0331244	0.263339	-0.420571
MARCH6	0.0332823	0.26419	-0.26641
SPIB	0.0332968	0.26419	-0.459515
ITGA7	0.0332987	0.26419	0.339319
MEPCE	0.0333097	0.26419	-0.486631
CENPB	0.0333378	0.264258	0.276617
INPP5F	0.0333777	0.264419	-0.257478
TAOK1	0.0334805	0.264924	-0.606286
HERPUD1	0.0334745	0.264924	-0.381578
CD36	0.0335408	0.26509	0.334667
MYD88	0.0335381	0.26509	-0.268739
ATP6V1G2-DDX39B /// DDX39B /// SNORD84	0.0337427	0.265386	-0.425748
DLG1	0.033734	0.265386	-0.172277
LZTS3	0.0337634	0.265386	-0.476504
KHK	0.0337747	0.265386	0.250615
TOP1	0.0336755	0.265386	0.469745
PIBF1	0.033717	0.265386	-0.311401
ZAP70	0.0336767	0.265386	-0.544913
CERK	0.0335982	0.265386	-0.419501
MIS18A	0.03366	0.265386	0.305853
C1orf186 /// LOC100505650 /// LOC101929219	0.0336912	0.265386	-0.417402
C19orf10	0.0338668	0.265956	0.396902
MRS2	0.0339998	0.266845	-0.204816
SCD	0.0340616	0.267175	0.228244
SLIRP	0.0340884	0.26723	0.560923
CALML4	0.0342279	0.268168	0.341721
SOD1	0.0342618	0.268278	0.364834
LOC102724364 /// SEC22B	0.0343426	0.268755	-0.276174
RBM15	0.034417	0.269182	-0.528129
VIPR1	0.0344636	0.269234	-0.714565
BTNL2	0.03445	0.269234	0.502223
HLA-DRB1 /// HLA-DRB1	0.0345085	0.269274	-0.440285
TTC9	0.0344987	0.269274	-0.297751
RPL37A	0.0345375	0.269345	-0.337023
LIPT1	0.0345703	0.269361	-0.350899
RABL3	0.0345795	0.269361	-0.469771
SLC2A6	0.0346132	0.269468	0.599058
RAB13	0.0346733	0.269781	0.449399
FEN1	0.0347631	0.270168	0.313991
DDX17	0.0347482	0.270168	-0.797346
SP2	0.034804	0.270331	-0.250688
CSH1 /// CSHL1 /// GH1 /// GH2	0.0348302	0.270379	-0.168896
SLC29A1	0.0349294	0.27061	-0.413457
WBP2	0.03496	0.27061	0.541449
GS1-111G14.1	0.0349272	0.27061	-1.18569
CRTC3	0.0349506	0.27061	-0.321737
GBA3	0.0349224	0.27061	0.30394
ZNF211	0.0350004	0.270612	-0.468017
ROBO3	0.0350002	0.270612	-0.334074
NCAPG	0.0350553	0.270727	0.331236
MMP27	0.0350368	0.270727	0.247396
RPUSD2	0.0352512	0.272084	-0.4776
DCTD	0.0353161	0.27243	-0.313645
PHF20	0.0354011	0.272619	-0.225603
YTHDC1	0.0353991	0.272619	-0.313198
C2CD2	0.0353664	0.272619	0.572958
ATOX1	0.0354561	0.272878	0.896454
CSF3R	0.0354883	0.272878	0.481513
C12orf5	0.0354954	0.272878	0.499445
GPR6	0.0355547	0.273179	0.429485
DNAJC15	0.0356748	0.273946	0.444484
HMHA1	0.0356982	0.27397	-0.336431
SEMA3G	0.0357319	0.274073	0.563224
BC069756	0.0358086	0.274506	0.405041
TBC1D12	0.0358661	0.27479	0.336521
PDCD6	0.0359226	0.275028	-0.262093
IGF2BP2	0.0359378	0.275028	0.638821
TUBG2	0.0360463	0.275546	0.399789
RIOK2	0.0360444	0.275546	0.515749
ZGPAT	0.0361901	0.276489	-0.45376
PGS1	0.0362357	0.276681	0.650865
INPP1	0.0362812	0.276872	-0.311954
TAF2	0.0363041	0.276891	-0.406341
LAP3	0.0363329	0.276954	0.699541
HNRNPA3P1	0.0363545	0.276962	0.371297
LST1	0.0365234	0.278092	0.400929
HK1	0.0367096	0.279051	0.780634
COX7C	0.0367222	0.279051	0.515486
POLR2B	0.0368742	0.279051	-0.39465
RPL27A /// SNORA45A	0.0369106	0.279051	-0.258206
HS2ST1	0.0368862	0.279051	-0.246408
STAM	0.036894	0.279051	-0.254402
RIMS3	0.0369076	0.279051	-0.169207
SF3B4	0.0368705	0.279051	-0.309932
KIF2C	0.0367881	0.279051	0.31171
HLA-DQB1	0.0366768	0.279051	-0.461337
DLC1	0.0368071	0.279051	0.275757
CEP55	0.0368361	0.279051	0.497577
TLDC1	0.0369178	0.279051	0.183933
EPRS	0.0369578	0.279198	-0.274126
RABGAP1	0.0369856	0.279251	-0.257494
ARTN	0.0370089	0.279271	0.240158
SNAI2	0.0370376	0.279332	0.347993
FKBP1A /// LOC101929368	0.0371862	0.279577	0.303605
SHFM1	0.0372814	0.279577	0.341664
HDAC9	0.0373003	0.279577	-0.28313
PHTF1	0.0371526	0.279577	0.241487
WDR45B	0.0373124	0.279577	-0.429764
SIAH2	0.0372176	0.279577	0.67362
NTHL1	0.037315	0.279577	-0.377922
NEK7	0.0373183	0.279577	-0.348347
ARL5A /// LOC101929356	0.037212	0.279577	-0.375559
CPPED1	0.0371152	0.279577	-0.359021
ACTR3B	0.0372769	0.279577	-0.395888
LINC00965	0.0372542	0.279577	-0.339801
AKAP2 /// PALM2-AKAP2	0.0374092	0.279948	-0.362102
RNF115	0.0374042	0.279948	-0.353475
CHRNB3	0.0374831	0.280346	0.203767
SIAH1	0.0376356	0.280479	-0.283965
CD3E	0.0376237	0.280479	-0.735195
GNLY	0.037667	0.280479	-0.609871
CREB5 /// LOC401317	0.0375715	0.280479	0.561384
MAGOH /// MAGOHB	0.0375719	0.280479	0.332853
TTC18	0.0375597	0.280479	-0.661424
ARFGEF2	0.0376153	0.280479	-0.202406
OR1F1	0.0376574	0.280479	0.37165
CD300C	0.0377128	0.280666	0.561371
RCBTB2	0.0377518	0.280801	-0.403932
RNF10	0.0378134	0.281002	0.588978
SYNJ2	0.0378216	0.281002	-0.163349
C1orf174	0.0378412	0.281002	-0.28023
STRA13	0.0378714	0.281072	-0.661007
NDUFAF1	0.0380692	0.28223	0.241492
OLIG2	0.038059	0.28223	-0.454241
MET	0.0381167	0.282299	0.242054
CDC14A	0.0381203	0.282299	-0.229565
POLB	0.0381834	0.282302	0.417507
TMEM140	0.0381748	0.282302	0.420626
ANKRD27	0.0381567	0.282302	-0.288735
TTI1	0.0382202	0.28242	-0.606874
RAB4A /// SPHAR	0.038268	0.282549	-0.239458
ANGEL2	0.0382794	0.282549	-0.281447
IFNG	0.038315	0.282657	0.34211
IPO5	0.038422	0.283156	-0.251006
NDUFA3	0.0384245	0.283156	-0.487283
LOC101930578 /// MRPS31P5 /// THSD1	0.0384647	0.283297	-0.398881
GNL3 /// SNORD19B	0.0385167	0.283371	0.318361
NEUROD4	0.0385049	0.283371	-0.372964
API5	0.038575	0.283646	-0.170102
ADNP	0.0385982	0.283662	-0.421807
APOO	0.0387236	0.284429	0.299976
TCN1	0.0387667	0.284591	0.40645
NAT9	0.0388735	0.284782	-0.556387
FZD1	0.0388534	0.284782	0.244066
UBE2I	0.0388981	0.284782	-0.235534
ANKRD46	0.0388588	0.284782	-0.275525
STEAP3	0.0388873	0.284782	0.488462
ULK1	0.0389577	0.285064	0.481904
MAPKAPK3	0.039036	0.285174	0.314231
COPS4	0.0390092	0.285174	0.341022
UBAP2	0.0390215	0.285174	-0.298478
USE1	0.0391175	0.285615	-0.401399
MYNN	0.0392054	0.285947	0.401454
GNB1L	0.0391844	0.285947	-0.474246
BOLA2 /// BOLA2B	0.0392299	0.285972	0.565874
SPC25	0.0393563	0.286739	0.291182
RBM25	0.0394142	0.286913	-0.263201
NHEJ1 /// SLC23A3	0.0394227	0.286913	-0.571765
GP2	0.0394927	0.287013	0.229103
CNTN6	0.0394762	0.287013	0.3392
TSPAN13	0.0395001	0.287013	-0.36684
SIGLEC8	0.0395816	0.287296	-0.295697
PIK3IP1	0.0395674	0.287296	-0.37568
CLEC1B	0.0396247	0.287454	0.615346
SBNO2	0.0397325	0.288082	0.859894
ARHGEF3	0.0398844	0.288873	-0.409576
AMIGO2	0.039872	0.288873	-0.359345
VPS11	0.040052	0.289932	-0.244024
KDM4C	0.0401032	0.290147	-0.237021
PCDH8	0.0402456	0.290555	-0.3246
GADD45B	0.0402276	0.290555	0.29603
HN1L	0.0401891	0.290555	-0.335772
TOB2	0.0402027	0.290555	-0.400949
SEC62	0.0402883	0.290708	0.772816
MIR6787 /// SLC16A3	0.0403585	0.291059	0.486156
NUP54	0.0404128	0.291295	-0.239892
NONO	0.0404911	0.291549	-0.413361
GPR89A /// GPR89B	0.0404793	0.291549	-0.225551
UBE2H	0.0405576	0.291872	0.720137
PTPRO	0.0406162	0.292138	-0.338737
LRRFIP1	0.040721	0.292581	-0.20745
FGF13	0.0407162	0.292581	0.337604
GJA9-MYCBP /// MYCBP	0.0408143	0.293095	0.295993
PPAP2B	0.0409531	0.293935	0.224747
CDK5RAP1	0.0410073	0.294168	-0.463072
CLK2	0.0411464	0.294228	-0.52783
KRT16	0.0411607	0.294228	0.210085
USB1	0.041168	0.294228	0.493275
ASRGL1	0.041125	0.294228	-0.770299
C7orf26	0.041109	0.294228	-0.316604
ATRAID	0.0410787	0.294228	-0.431602
SLC25A32	0.0411047	0.294228	-0.280607
HDAC4	0.04122	0.294444	0.273601
FZD8 /// MIR4683	0.041291	0.294796	-0.243062
HRK	0.0413681	0.29519	-0.334859
DAPK2	0.041467	0.295666	-0.385423
GLTSCR1L	0.0414786	0.295666	-0.558152
SLC24A2	0.0415646	0.296123	0.55557
WFS1	0.0416676	0.296174	0.283017
GUCY1B3	0.0416445	0.296174	0.36827
SLC9A1	0.0417251	0.296174	-0.536741
CLEC2B	0.0416737	0.296174	0.923874
SMARCE1	0.041718	0.296174	-0.298099
VPS4B	0.0416947	0.296174	-0.387948
CEPT1	0.0417002	0.296174	0.333916
TOM1	0.0417551	0.296178	0.456054
RPS28	0.0417696	0.296178	-0.229334
UBR7	0.0418326	0.29647	-0.312237
POR	0.0419111	0.29687	0.726071
ZNF234	0.0420037	0.297215	-0.254707
KIF15	0.0419844	0.297215	0.263495
STT3A	0.04207	0.297528	0.356184
USP14	0.0421313	0.297758	-0.231645
COG8 /// PDF	0.0421465	0.297758	-0.30228
RUVBL2	0.0423065	0.298609	-0.471503
LIN7A	0.042314	0.298609	0.457204
SIRT1	0.0423333	0.298609	-0.209005
CTNNBIP1	0.0423912	0.298861	0.396911
EMP2	0.0424628	0.29921	0.580073
DDX46	0.0425684	0.299642	-0.651557
CCNT1	0.0425635	0.299642	-0.86151
FERMT2	0.0426297	0.299917	0.202755
TNN	0.0426671	0.300024	-0.368948
TOB1	0.0427232	0.300262	-0.402926
CYP4F3	0.0428958	0.301162	0.471568
EFTUD1	0.0428779	0.301162	-0.263688
TYMP	0.0430489	0.30208	0.48652
COX6B1P3 /// COX6B1P3	0.0431474	0.302457	0.424669
CLPB	0.0431466	0.302457	-0.375227
LOC101929087 /// SUMO2 /// SUMO3	0.0431943	0.302629	-0.317529
SLC9A3R1	0.0432293	0.302717	-0.371285
IDI2-AS1	0.0432537	0.302731	0.281368
TRAPPC10	0.0433778	0.303023	-0.324207
KLHDC2	0.0433846	0.303023	-0.263979
ECI2	0.0433218	0.303023	-0.349156
THEG	0.043385	0.303023	-0.438202
MIR6883 /// PER1	0.0434431	0.303271	0.355819
IGHA1 /// IGHG1 /// IGHG3 /// IGHM /// IGHV4-31	0.0434861	0.303415	0.569313
IK	0.0436069	0.303944	-0.493794
DHRS7	0.0435969	0.303944	-0.192724
ENC1	0.0436821	0.304311	-0.254097
ZMYND11	0.0437948	0.30434	-0.377969
ARNT2	0.0437778	0.30434	0.234381
OGG1	0.0437471	0.30434	-0.247684
NEUROD2	0.043794	0.30434	0.543112
LHFP	0.0437988	0.30434	0.257855
PLP1	0.0438873	0.304798	0.361533
EIF4B	0.0439355	0.304976	-0.345078
ZMPSTE24	0.0439906	0.305048	0.288712
DHRS12	0.043991	0.305048	0.345474
POLR3K	0.0440444	0.305262	0.470367
LTN1	0.0440956	0.30546	-0.400558
SZT2	0.0444595	0.306254	-0.329304
ACD	0.0443242	0.306254	-0.530199
APMAP	0.0443984	0.306254	0.365998
CCDC130	0.0444411	0.306254	-0.640149
ABI1	0.0444212	0.306254	-0.291283
FAM98A	0.0443062	0.306254	0.362053
MPHOSPH10	0.044436	0.306254	-0.572123
HDAC3	0.0442987	0.306254	-0.543683
NAA50	0.0444407	0.306254	-0.346066
PDCD6IP	0.0443279	0.306254	-0.278664
TBL1XR1	0.0443593	0.306254	-0.372021
DLK2	0.0444863	0.306283	-0.438711
ZC3H14	0.0446445	0.306502	-0.347133
PHIP	0.0446543	0.306502	-0.348199
SEC16A	0.0446458	0.306502	-0.34649
SNX16	0.0446273	0.306502	-0.29304
GVINP1	0.0445586	0.306502	-0.313085
FRMD1	0.0445638	0.306502	-0.191461
GATAD1	0.0447629	0.306942	-0.264228
CRYAB	0.0447638	0.306942	0.55019
IGHA1 /// IGHA2 /// IGHD /// IGHG1 /// IGHG3 /// IGHM /// IGHV4-31	0.0448132	0.307125	0.625961
CTAGE5	0.0448601	0.307188	-0.404423
FBXW12	0.0448678	0.307188	-0.479993
CPOX	0.0450292	0.307358	-0.402425
CCR2	0.0449933	0.307358	0.323397
CDK16	0.0450216	0.307358	0.260922
VDAC1	0.0449568	0.307358	-0.310649
MED31	0.0450048	0.307358	0.392434
SERTAD3	0.0450055	0.307358	0.354319
AIF1	0.0451701	0.308165	0.380229
SLN	0.0452018	0.308225	0.362892
SREBF2	0.0453654	0.308286	0.33328
POLR3D	0.0453244	0.308286	-0.376347
TUSC3	0.0453225	0.308286	0.286193
BACE2	0.0452409	0.308286	-0.521781
GCC1	0.0453704	0.308286	0.263124
CTBS	0.0453448	0.308286	-0.35562
TLR7	0.0453206	0.308286	-0.366361
ATP1B1	0.0454486	0.308662	-0.329254
TGM5	0.0455043	0.308722	0.55058
PCBP1	0.0455259	0.308722	-0.306375
MYO19	0.0455068	0.308722	0.452396
MAD2L1	0.0456694	0.308962	0.385457
VEGFB	0.0456304	0.308962	-0.570584
GLE1	0.0456591	0.308962	0.321905
SYT12	0.0456219	0.308962	0.36609
SLC5A4	0.0456756	0.308962	0.299984
PLEKHF1	0.0457499	0.30931	-0.774918
[truncated: 11,516 more rows]

## Sheet: UM-CM
Gene	Pvalue	FDR	logFC
MMP8	4.41447e-06	0.0298308	1.9366
UBE2G2	3.28204e-06	0.0298308	-1.0595
GUCA2A	3.08499e-05	0.104234	0.730605
ELP3	2.77064e-05	0.104234	-0.89793
ANKRD40	5.47771e-05	0.136914	-0.840492
OLAH	6.0783e-05	0.136914	0.677288
THBS1	0.000141067	0.142441	0.39067
TGFBI	0.000248288	0.142441	-0.749055
SEC14L1	8.96581e-05	0.142441	-0.492572
KLF7	0.000221453	0.142441	0.767663
RASSF1	0.000126217	0.142441	0.587908
VRK2	0.000187154	0.142441	-0.907915
VNN1	0.000258396	0.142441	1.28939
PTGIR	0.000181125	0.142441	-0.84872
HBZ	0.000243159	0.142441	-1.52528
HIST1H2BN	0.000226776	0.142441	1.26192
GRM5	0.000174035	0.142441	0.530736
CHIT1	0.000164169	0.142441	0.80197
OLFM4	0.000122852	0.142441	2.40157
KCTD5	0.000193008	0.142441	-0.689538
LAGE3	0.000263487	0.142441	-0.865345
ACAD10	0.000206393	0.142441	-0.603967
MGAT4B	0.000136277	0.142441	0.656787
FER1L4	0.00017009	0.142441	0.609487
BABAM1	0.000262693	0.142441	-0.609819
IFIT1	0.000286676	0.142991	-2.57824
BTN3A2 /// BTN3A3	0.000293114	0.142991	-0.935924
ELAVL2	0.000302023	0.142991	0.372296
SNRNP25	0.000306824	0.142991	-0.680505
SNRPC	0.000423907	0.148048	-1.00499
DDB2	0.000438174	0.148048	-0.493662
ACVR1	0.000393429	0.148048	-0.414955
DEFA1 /// DEFA1B /// DEFA3	0.000396786	0.148048	2.26423
PTH1R	0.000381945	0.148048	0.920015
ARG1	0.000429761	0.148048	1.17859
HP /// HPR	0.000346773	0.148048	1.13921
DAGLA	0.000338382	0.148048	0.57799
NIF3L1	0.000380308	0.148048	-1.26935
RNASEH1	0.000411526	0.148048	-0.588844
STRA6	0.00040349	0.148048	0.519525
CCDC7	0.000449935	0.148314	-0.628844
DDX24	0.000847122	0.159064	-0.566631
RPL13A /// SNORD32A /// SNORD33 /// SNORD34 /// SNORD35A	0.000805803	0.159064	0.750559
APOD	0.00100668	0.159064	0.982987
LTF	0.000702861	0.159064	1.85778
MX1	0.000525792	0.159064	-1.72216
TOR1A	0.000828435	0.159064	0.448455
TRIP10	0.000686374	0.159064	0.438185
OAS1	0.000978628	0.159064	-1.00726
MAD2L1BP	0.000630962	0.159064	-0.534929
DHX30	0.000940276	0.159064	-0.702576
GLDC	0.00067472	0.159064	-0.491268
IL1R2	0.000656049	0.159064	1.62166
MC1R	0.00102119	0.159064	0.545862
FLAD1	0.000783775	0.159064	-0.542656
ZBTB16	0.000796901	0.159064	0.674417
OMD	0.000888002	0.159064	0.741447
DPYS	0.000896286	0.159064	0.632927
HP	0.000593219	0.159064	0.847464
NAT8B	0.000975575	0.159064	-0.664031
CCR5	0.000858317	0.159064	0.865099
MR1	0.000896571	0.159064	-0.363889
FOXD2	0.000886142	0.159064	0.558084
IL13	0.000834574	0.159064	0.795247
LIPE	0.00105625	0.159064	0.418892
TSPAN4	0.000945347	0.159064	-0.507452
TAF12	0.000712024	0.159064	-0.874306
HOXA5	0.00105925	0.159064	0.836175
PRSS3P2	0.000508211	0.159064	-0.852384
GUCA1B	0.000696034	0.159064	-0.387761
RP4-595K12.1	0.00105847	0.159064	0.569308
PTMAP1 /// PTMAP1	0.000978615	0.159064	0.739233
BCL2L13	0.000953242	0.159064	-0.853378
SLC25A38	0.000611837	0.159064	-0.681968
PLEKHO1	0.000943746	0.159064	-0.806537
MRGBP	0.000516933	0.159064	-0.460456
PCTP	0.000999562	0.159064	-1.07489
PDGFC	0.000622177	0.159064	0.608464
HJURP	0.000834927	0.159064	0.819905
TESC	0.000858922	0.159064	-1.10861
IPPK	0.00105661	0.159064	-0.578414
GTF3C4	0.00102241	0.159064	-0.727074
CNTNAP1	0.00088914	0.159064	0.992995
CCDC71	0.000755314	0.159064	-0.860443
NIPAL2	0.0010186	0.159064	1.19031
LOC101928274 /// VSIG10	0.000659498	0.159064	0.536351
FPGT-TNNI3K /// TNNI3K	0.000956208	0.159064	0.715957
NDST3	0.00082825	0.159064	0.439337
SHARPIN	0.000719387	0.159064	-1.03192
RASSF4	0.000898512	0.159064	-0.365632
TARDBP	0.00110569	0.159587	-0.482828
TTLL4	0.00107688	0.159587	0.4918
TCTN2	0.00111747	0.159587	0.51683
CEACAM8	0.00112177	0.159587	1.31176
PTP4A2	0.00111583	0.159587	-0.441658
CAPN3	0.00116821	0.159814	0.358955
HLA-DQA1 /// HLA-DQA2 /// LOC100509457	0.00116675	0.159814	-1.12409
SRRD	0.00117263	0.159814	-1.08842
TSHB	0.00119464	0.159814	0.785978
ZNF408	0.00120614	0.159814	-0.654993
LIME1	0.00118847	0.159814	-0.791329
LRRC16A	0.00115004	0.159814	0.529142
LOC100134822 /// LOC100288069 /// LOC100996442 /// LOC101927270 /// LOC101928344 /// LOC101928670 /// LOC101929540 /// LOC102724409	0.00122394	0.160597	0.61928
ISG15	0.00124032	0.161181	-1.86162
IFIT5	0.00141177	0.169632	-1.0645
SCG5	0.00137837	0.169632	0.507183
SNX15	0.0014183	0.169632	-0.718947
EPPIN /// EPPIN-WFDC6	0.00134331	0.169632	0.508509
INSM1	0.00133411	0.169632	0.62549
PTPLB	0.00141085	0.169632	-0.373436
MUL1	0.00139372	0.169632	1.10726
SNTG1	0.00137873	0.169632	0.797234
ACOT9	0.00133934	0.169632	-0.58244
GTF2IRD2B	0.00144623	0.171454	0.476645
ACR	0.00148338	0.174272	0.669267
DCTPP1	0.00149578	0.174272	-0.806076
RPS15A	0.0017246	0.174525	0.676199
BCL2L2 /// BCL2L2-PABPN1 /// PABPN1	0.00167845	0.174525	0.494543
COL5A1	0.00159042	0.174525	0.434951
MBD1	0.00173686	0.174525	-0.568811
SHROOM2	0.00186108	0.174525	0.532856
DSG3	0.00168779	0.174525	0.335958
SNRPA1	0.00188096	0.174525	-0.612054
FMO4	0.00164842	0.174525	1.14011
CDH11	0.00167451	0.174525	0.470445
PGLYRP1	0.00189762	0.174525	1.61789
CYP2C18	0.0015172	0.174525	0.397205
RRAS2	0.00160086	0.174525	0.427275
DAP3	0.0016829	0.174525	-1.03152
B3GALT4	0.0017114	0.174525	-0.491781
TNFSF13	0.00169309	0.174525	-0.742382
HLA-DPA1	0.00191119	0.174525	-0.672431
MSL1	0.00185662	0.174525	0.691327
ZDHHC18	0.00178257	0.174525	-0.512538
GPR65	0.00174377	0.174525	-0.806106
UPK1A	0.00186994	0.174525	0.744496
ACVR2B-AS1	0.00170208	0.174525	0.891396
FLCN	0.00190537	0.174525	0.635101
SSX2B	0.00183122	0.174525	0.737866
PP13	0.0016822	0.174525	1.09118
CWF19L1	0.00186085	0.174525	-1.15392
ZNF562	0.00189219	0.174525	-0.457242
WDR5B	0.00174429	0.174525	0.507527
ERVMER34-1	0.00173181	0.174525	0.663949
CHST4	0.00155571	0.174525	0.856577
CCDC40	0.00183793	0.174525	0.535382
ROBO4	0.00189958	0.174525	0.723412
IL1RAPL2	0.00173171	0.174525	0.582305
KCNJ10	0.00193767	0.175356	0.746747
GOT2P1 /// GOT2P1	0.00194623	0.175356	-0.696043
PRKAR1B	0.00196964	0.176289	0.360358
LCN2	0.00198859	0.176814	1.573
SLC35B1	0.00206212	0.177167	-0.589783
IPO13	0.00207142	0.177167	0.57111
ITGA9	0.00211843	0.177167	0.708769
SIN3B	0.00213675	0.177167	-0.329527
HDGFRP3	0.0021308	0.177167	0.304813
SLC43A3	0.0021025	0.177167	-0.450443
LIMS1 /// LIMS3 /// LIMS3L	0.00212176	0.177167	0.735236
GPR3	0.00202247	0.177167	0.769637
SLC2A6	0.00213322	0.177167	-0.933408
BATF3	0.00200907	0.177167	-1.09127
MRPL34	0.00210686	0.177167	-0.80225
SNX5	0.00215134	0.177289	-0.942004
REN	0.00218907	0.179304	0.44429
GTF2H5	0.00225048	0.181043	-0.69316
SPAG4	0.00223586	0.181043	-0.501321
EPN1	0.0022389	0.181043	-0.53448
SUMO3	0.00251725	0.187321	-0.302021
PSMD3	0.0023445	0.187321	-0.918916
APRT	0.00247499	0.187321	-0.814344
DSCR3	0.00240669	0.187321	-0.32366
TATDN2	0.00266731	0.187321	0.506797
CEACAM6	0.0026258	0.187321	0.97374
SRSF10	0.00260006	0.187321	-0.344713
SOX12	0.00266887	0.187321	0.417173
BST1	0.00250019	0.187321	0.544155
ATRIP /// TREX1	0.0024529	0.187321	-1.15183
CX3CR1	0.00263944	0.187321	-0.715613
MSX1	0.00262167	0.187321	0.847349
WISP1	0.00260994	0.187321	0.391143
STAT3	0.00242302	0.187321	-0.561546
NFIX	0.00247366	0.187321	-1.22741
SCAP	0.00258341	0.187321	-0.885916
IMP4	0.00257303	0.187321	-1.05342
CDIP1	0.00254543	0.187321	-0.446831
DACT1	0.00266775	0.187321	0.446576
TEX40	0.00264383	0.187321	1.30483
AMIGO3 /// GMPPB	0.00253229	0.187321	-0.767236
CD244	0.00266607	0.187321	-0.767206
FAR2	0.0024785	0.187321	0.875103
GDF9	0.0023653	0.187321	0.57447
SLC27A3	0.00267502	0.187321	-0.689313
KRT5	0.00271276	0.188216	0.938626
LRRC75B	0.00271566	0.188216	0.598807
HNRNPR	0.00273815	0.188806	-0.569127
DIP2C	0.00276671	0.189808	0.631149
FAN1	0.00288035	0.192996	0.628672
TPSB2	0.00287952	0.192996	0.733906
KIR2DL2	0.00285144	0.192996	1.11764
TCTN3	0.00288458	0.192996	0.358445
C16orf80	0.00284481	0.192996	-0.734332
YIF1A	0.00313919	0.194212	-0.569083
NUP98	0.00299157	0.194212	-0.450203
SF3A3	0.00306792	0.194212	-0.31479
APOB	0.00307738	0.194212	0.678201
KNG1	0.0031354	0.194212	0.387956
PCYT1B	0.00295773	0.194212	0.441212
OCM2	0.00295191	0.194212	0.67873
DPM2	0.00316143	0.194212	-0.687329
EGFL8 /// PPT2	0.00310424	0.194212	-0.542309
CNTN1	0.00311016	0.194212	0.714202
GPR116	0.00314773	0.194212	0.286884
SMR3A	0.00303626	0.194212	0.702843
CLDN9	0.00312745	0.194212	0.43641
TTLL12	0.00304691	0.194212	0.482975
YY1AP1	0.00306913	0.194212	-0.831438
DHX32	0.00304976	0.194212	1.03432
LOC100130872 /// SPON2	0.00313843	0.194212	-0.666741
LRRC49	0.00301951	0.194212	0.463883
PSMF1	0.0032163	0.194743	-0.676852
RFNG	0.00322771	0.194743	0.398599
HUNK	0.00319109	0.194743	0.452893
MED17	0.00321517	0.194743	-0.491813
EEF1D	0.00343433	0.196114	0.405125
REST	0.00340293	0.196114	0.637939
ZNF211	0.0033929	0.196114	-0.688974
PFKFB1	0.00337909	0.196114	-0.634359
IPO4 /// TM9SF1	0.00326646	0.196114	-0.43837
PCGF1	0.0033062	0.196114	-0.695008
RNF187	0.00343908	0.196114	-0.519451
CXorf40A	0.00329142	0.196114	-0.44164
AF007147	0.00340293	0.196114	-0.911324
SIGLEC15	0.00339046	0.196114	1.06669
SLC39A1	0.00342865	0.196114	-0.560395
OGFOD3	0.00336879	0.196114	-0.27712
TRMT61B	0.00341936	0.196114	-0.662494
PEX14	0.00345872	0.196406	-0.56538
NUDT4 /// NUDT4P1	0.00350654	0.196643	-1.29539
ZCWPW1	0.00348727	0.196643	0.715125
OR52A1	0.00349907	0.196643	0.727102
PRPF4B	0.0037142	0.197954	-0.44837
DHPS	0.0037215	0.197954	-0.504776
ADNP2	0.00376427	0.197954	-0.547813
SCN3B	0.00368639	0.197954	0.389494
AOX1	0.00368049	0.197954	0.315456
PRL	0.00368696	0.197954	0.819697
METTL13	0.00361317	0.197954	0.362701
GRIN2A	0.00375736	0.197954	0.952728
UTP3	0.00357995	0.197954	-0.692531
ZNF787	0.00358875	0.197954	-0.568016
TMEM214	0.00369096	0.197954	-0.530637
ARRB1	0.00373628	0.197954	-0.462883
SLC35C2	0.00370081	0.197954	0.593072
NSUN7	0.00357268	0.197954	0.448781
CDK5RAP2	0.00375516	0.197954	0.703809
OR1A1	0.00368306	0.197954	0.631659
FAM47E /// FAM47E-STBD1 /// STBD1	0.00378855	0.198458	0.532377
SLPI	0.00381191	0.198466	0.598356
HCG26	0.0038272	0.198466	-0.511588
C12orf10	0.00383275	0.198466	-0.537326
PSMA5	0.00413982	0.198849	-0.74615
DYNC1LI2	0.00408079	0.198849	-0.468509
PHKG2	0.00388059	0.198849	0.637698
NDUFAF1	0.00397874	0.198849	0.354465
SMAD7	0.00416263	0.198849	-0.400326
PPP2R4	0.00411968	0.198849	-0.680117
SMTN	0.00416384	0.198849	0.481626
SRY	0.00395348	0.198849	0.573646
ART1	0.00403479	0.198849	0.633299
POLE3	0.00415408	0.198849	-0.436653
MS4A3	0.00414918	0.198849	1.00519
NACAP1	0.00391632	0.198849	0.450952
WIPF2	0.00403683	0.198849	-0.31216
MRPS31	0.0039761	0.198849	-0.592882
GPR20	0.00413477	0.198849	-0.747194
IVL	0.00392786	0.198849	0.937239
PTPLAD1	0.00396752	0.198849	-0.453519
FAM160B2	0.00408468	0.198849	0.355247
SLC35E3	0.00412716	0.198849	0.414859
THAP10	0.00414006	0.198849	0.629264
APOLD1 /// DDX47	0.00405359	0.198849	-0.383489
ASUN	0.00409232	0.198849	-0.646171
ZMIZ2	0.00421084	0.200386	0.316598
S100P	0.00427413	0.201982	1.02095
STYXL1	0.00428923	0.201982	-0.882631
DNAJA4	0.00428869	0.201982	0.774994
PSMD13	0.00502969	0.20264	-0.703814
PRCP	0.00493067	0.20264	0.51151
EGR1	0.00432327	0.20264	-0.704392
MTA1	0.00504148	0.20264	-0.355141
NDST1	0.0045349	0.20264	-0.364196
CD68 /// LOC101928634 /// SNORA67	0.00517082	0.20264	-0.627274
ZBTB17	0.00443933	0.20264	-0.311574
ALG11 /// UTP14C	0.0048543	0.20264	-0.31608
TMOD1	0.00510051	0.20264	-0.933726
AK4 /// LOC100507855	0.00503454	0.20264	0.363786
ATXN7	0.00446271	0.20264	-0.459994
IFIT3	0.00517395	0.20264	-1.30244
TRIM21	0.00465859	0.20264	-0.578003
CMC4 /// MTCP1	0.00449588	0.20264	-0.522954
AOAH	0.00491717	0.20264	-0.675685
MAP2K6	0.00445637	0.20264	0.431799
ITGAM	0.00458072	0.20264	0.619068
SERPINB8	0.00514552	0.20264	-0.418372
GNB3	0.0049891	0.20264	-0.589802
PRKCH	0.00514793	0.20264	0.419875
NR0B2	0.00485222	0.20264	0.955398
NRG2	0.00474861	0.20264	0.293342
ZNF253	0.00468846	0.20264	0.504462
CLDN11	0.00484542	0.20264	-0.807479
PAX9	0.00481069	0.20264	-0.393713
NR1I2	0.00508086	0.20264	0.683705
F9	0.00515256	0.20264	0.474547
RYR2	0.00491283	0.20264	0.419843
RNF125	0.00434836	0.20264	-0.540628
IL1A	0.00453177	0.20264	0.333751
DMC1	0.00469263	0.20264	0.425506
KIR2DL4	0.00518782	0.20264	0.391303
PRCC	0.00504144	0.20264	-0.766964
BECN1	0.00497121	0.20264	-0.474196
DNASE2	0.00463508	0.20264	-0.543734
PKP3	0.00440445	0.20264	0.507299
NRXN1	0.00476818	0.20264	0.275656
ATP8A1	0.00449626	0.20264	0.565419
XDH	0.0044172	0.20264	0.880518
NAA11	0.00495051	0.20264	0.46694
ZKSCAN3	0.0050671	0.20264	0.598484
MLC1	0.00495726	0.20264	-0.838685
PHOX2A	0.00462025	0.20264	-0.573578
SHC1P1 /// SHC1P1	0.00447713	0.20264	0.54494
SQRDL	0.00484495	0.20264	0.605119
COPS4	0.00441935	0.20264	-0.496118
SENP2	0.00498678	0.20264	0.455552
TAPBPL	0.00484712	0.20264	-0.676885
CASD1	0.0051383	0.20264	0.385092
EMCN	0.00512313	0.20264	0.441463
CLEC5A	0.00500616	0.20264	0.504416
CABYR	0.00461898	0.20264	0.609097
EDAR	0.00492703	0.20264	0.380874
CEBPA-AS1	0.00477143	0.20264	0.671048
ATP1B4	0.00447535	0.20264	0.280647
OGFOD1	0.00502838	0.20264	-0.5644
GPR32	0.00503175	0.20264	0.474936
CALML4	0.00464616	0.20264	-0.479821
METTL2B	0.00503235	0.20264	0.726348
COL9A3	0.00523012	0.203118	0.333457
DEFA4	0.00521527	0.203118	1.77003
PAGR1	0.00525849	0.203635	-0.636735
STMN1	0.0055233	0.204944	0.448688
IER3	0.00571688	0.204944	0.674341
PTGR2 /// ZNF410	0.0056302	0.204944	-0.560741
TJP2	0.0057066	0.204944	-0.520387
FMOD	0.00538128	0.204944	0.4419
FOXO1	0.00543065	0.204944	-0.560495
FUCA1	0.0053883	0.204944	-0.675658
KATNB1	0.00570528	0.204944	-0.434418
MMP11	0.00532346	0.204944	0.521635
MPO	0.00576019	0.204944	1.03932
PLCB2	0.00551721	0.204944	-0.407437
GADD45G	0.00563814	0.204944	0.744819
ITGA2	0.00569307	0.204944	0.301985
SLC6A1	0.00553095	0.204944	0.362339
ZBTB24	0.00569296	0.204944	-0.673538
ZNF197	0.00570343	0.204944	0.477181
RAB30	0.00577755	0.204944	0.552581
TBX5	0.00548816	0.204944	0.439518
TTN	0.00533731	0.204944	0.499967
IFNA1 /// IFNA13	0.00572667	0.204944	1.09842
NCKAP1L	0.00568145	0.204944	-0.430547
TMEM251	0.00539835	0.204944	-0.45586
EPX	0.00577166	0.204944	0.879994
TBC1D17	0.00540999	0.204944	-0.728495
SLC2A8	0.00573338	0.204944	0.663782
CEP85	0.00540144	0.204944	-0.537745
CLEC4A	0.00552462	0.204944	-0.762379
EPB41L4B	0.005536	0.204944	0.632573
TP53TG3 /// TP53TG3B /// TP53TG3C /// TP53TG3D	0.0055516	0.204944	0.35876
C5orf66	0.00545475	0.204944	0.673522
UGT1A1 /// UGT1A3 /// UGT1A5 /// UGT1A8 /// UGT1A9	0.00559128	0.204944	0.304989
MROH7-TTC4 /// TTC4	0.00549659	0.204944	-0.670623
CRELD2	0.00581669	0.205792	-0.610673
IGBP1	0.00597872	0.206416	-0.817464
SDHB	0.00593411	0.206416	-0.34921
CYP11A1	0.00591535	0.206416	0.569371
SLMO1	0.00599542	0.206416	0.345956
CXCL2	0.00600233	0.206416	0.550637
OLR1	0.00586285	0.206416	0.341921
WISP3	0.00594982	0.206416	0.532147
STAG3	0.00598075	0.206416	0.454114
FAM86C1	0.00586661	0.206416	0.357079
SIRT2	0.00592323	0.206416	0.636409
PDE11A	0.00599932	0.206416	0.675001
COPS3	0.00604285	0.206757	-0.641265
HLA-DRB1 /// HLA-DRB1	0.00603188	0.206757	-0.596823
G6PC2	0.0060663	0.207035	0.512107
CUX1	0.00614657	0.207159	-0.324693
NAT9	0.00614445	0.207159	-0.772009
PTPN14	0.00610401	0.207159	0.458982
PLA2G16	0.00613896	0.207159	-0.560661
RP11-348B17.1	0.00613312	0.207159	0.467742
ACKR4	0.00619924	0.208415	0.451996
SYNGR4	0.00622571	0.208785	0.585876
CD6	0.00630376	0.209325	0.388392
ATP6V0E2	0.0062736	0.209325	-0.603433
CCDC64	0.00627034	0.209325	0.79125
COL5A2	0.00629041	0.209325	0.317265
M6PR	0.0064428	0.209718	-1.15459
SIPA1L1	0.00641164	0.209718	-0.633721
CDC16	0.00648132	0.209718	-0.560226
CA12	0.00643426	0.209718	0.29584
ZNF140	0.00634101	0.209718	0.484926
PROX1	0.00648627	0.209718	0.586387
CTNND1 /// TMX2-CTNND1	0.00636596	0.209718	-0.295083
RAB6A /// RAB6C /// WTH3DI	0.0064118	0.209718	-0.666939
WWP1	0.00640903	0.209718	-0.413262
CSRNP2	0.00646678	0.209718	0.50099
NEUROD4	0.00647106	0.209718	0.512521
SLC6A14	0.00650734	0.209897	0.330853
GSS	0.00654421	0.210298	-0.416443
B4GALT5	0.0065509	0.210298	0.507259
MAN2A1	0.00659348	0.211163	-0.547523
ANXA1	0.00669627	0.212213	0.66813
DNAJB2	0.00665886	0.212213	-0.827255
ITPA	0.00670477	0.212213	-0.999528
OR7E14P	0.00667417	0.212213	0.515675
UFC1	0.00666942	0.212213	-0.559835
CA4	0.00676019	0.213132	0.804054
EIF4ENIF1	0.00676534	0.213132	-0.437779
ZNF133	0.00680263	0.213808	-0.361777
ATMIN	0.00684346	0.214592	-0.488546
CCDC92	0.00687591	0.215111	-0.512184
CCL14 /// CCL15-CCL14	0.00691274	0.215764	1.00225
PRPF4	0.0069292	0.215779	-0.761949
HGH1	0.00698196	0.216507	0.722134
ANGPT4	0.00698462	0.216507	0.57353
ARFIP2	0.0070345	0.216665	-0.780938
NPR2	0.00714778	0.216665	0.466023
ARSE	0.0071309	0.216665	0.489576
GIPC1	0.00715001	0.216665	0.669761
HSF4	0.00711862	0.216665	0.665314
ZNF391	0.00708409	0.216665	0.557776
NRBP1	0.00712538	0.216665	-0.948636
CCRN4L	0.00701418	0.216665	0.59076
PADI1	0.00712849	0.216665	1.07963
KCNMB3	0.00708419	0.216665	0.76125
ITIH2	0.00718505	0.217239	0.599617
CLK2	0.0072433	0.218512	-0.724007
RBMXL2	0.00726029	0.218536	0.477666
MKLN1	0.00737461	0.218845	-0.663736
PDE4D	0.00736514	0.218845	0.295579
JADE3	0.00738388	0.218845	-0.392591
POU4F3	0.00730214	0.218845	0.477281
RGPD3 /// RGPD4 /// RGPD5 /// RGPD6 /// RGPD8	0.00733327	0.218845	0.24988
CNPY3	0.00733242	0.218845	-0.843307
MC3R	0.00736453	0.218845	-0.370533
GP9	0.00741062	0.219156	0.851158
CD24	0.00746401	0.219296	0.646247
SLC6A10P /// SLC6A10PB /// SLC6A8	0.00745546	0.219296	-0.772606
HIST1H2APS4 /// HIST1H2APS4	0.00744956	0.219296	0.317333
RP11-209A2.1	0.00748747	0.219508	0.645517
CTSW	0.00754526	0.220723	-0.91165
TMX2	0.00794721	0.220958	-0.354633
PEX19	0.00823993	0.220958	-0.561572
MPZL1	0.00786878	0.220958	-0.320458
PAPPA	0.00820255	0.220958	0.492399
BLVRB	0.00794013	0.220958	-0.790663
SUCLA2	0.00805844	0.220958	-0.385729
PTPN9	0.00818415	0.220958	0.645483
ILVBL	0.00817539	0.220958	-0.270061
BYSL	0.00785755	0.220958	-0.604927
MAP3K5	0.00804285	0.220958	-0.584894
CXCL9	0.00784274	0.220958	0.549485
PPP3R1	0.00759566	0.220958	-0.602618
NEFM	0.00808004	0.220958	0.773551
IL6	0.00786101	0.220958	-0.52172
XAF1	0.0079233	0.220958	-1.19079
SRPK3	0.00775664	0.220958	0.496663
EPB41L3	0.00812503	0.220958	-0.362227
KRT75	0.00774412	0.220958	1.01349
DSC1	0.00817477	0.220958	0.375419
DEFA5	0.00802666	0.220958	0.504193
RASSF8	0.00781453	0.220958	0.54828
MC5R	0.00821367	0.220958	0.664867
VAT1	0.00764432	0.220958	0.863414
PADI2	0.0078692	0.220958	0.595168
GATA6	0.00817229	0.220958	0.411127
ITGAX	0.00822934	0.220958	0.525964
IRX5	0.00782119	0.220958	0.337989
MAGEA8	0.00812906	0.220958	0.468043
ID2B	0.00823749	0.220958	0.348468
DNAJC2	0.00806338	0.220958	-0.424409
DHX57	0.00795625	0.220958	-0.502774
PLXDC1	0.00801503	0.220958	0.388559
ZNF440	0.00778462	0.220958	0.491426
BFAR	0.00798153	0.220958	0.535452
LAMTOR2	0.0075945	0.220958	-0.796035
ZCCHC8	0.00810014	0.220958	-0.4951
ARHGAP10	0.00780228	0.220958	0.532326
RTP4	0.00776878	0.220958	-1.11239
GID4	0.00778875	0.220958	0.657608
ZNF669	0.00776105	0.220958	0.912979
GTPBP8	0.00806924	0.220958	-0.473289
GPRC5D	0.00802686	0.220958	0.44214
ID2	0.00829914	0.222105	-0.426315
ANXA4	0.00839806	0.223866	-0.534297
PPIL6	0.00838804	0.223866	0.26416
BTBD3	0.00847672	0.224193	-0.43799
CD3G	0.00845174	0.224193	-1.3654
EIF6	0.00845237	0.224193	-0.424268
EMC6	0.00846016	0.224193	-0.467965
ERCC6	0.00852131	0.224402	0.353733
FAM57A	0.00851482	0.224402	0.897992
GPR124	0.00853443	0.224402	0.32039
SLC52A2	0.00855372	0.224473	-0.454537
RNPEP	0.00857594	0.22462	-0.61324
RAB32	0.0086014	0.224625	0.539071
MN1	0.00860937	0.224625	0.529208
UBA52	0.00863279	0.224802	-0.419066
ERMP1	0.00867067	0.224915	0.714852
CHST11	0.00868706	0.224915	-0.602383
MRPL41	0.00867518	0.224915	0.997526
PPM1G	0.00880095	0.225155	-0.756465
TMED10	0.00891046	0.225155	-0.4191
DDX19A	0.00886868	0.225155	-0.574603
POMZP3 /// ZP3	0.00891912	0.225155	0.619022
PIK3CG	0.00883649	0.225155	-0.520637
NDN	0.0088817	0.225155	0.620392
CBX5	0.00894036	0.225155	-0.56572
RIPK1	0.0089629	0.225155	-0.680906
STX12	0.00886019	0.225155	-0.576465
AC007967.3 /// RBMY2TP /// RBMY2TP	0.00872765	0.225155	0.865327
RP6-149D17.1	0.00894417	0.225155	0.353601
ARMCX3	0.0088671	0.225155	-0.574041
GTF2IRD1	0.00896125	0.225155	0.919461
LPAR6	0.0089037	0.225155	-0.523386
THOC6	0.00886065	0.225155	-0.645011
SLC15A3	0.00877376	0.225155	-1.0519
TCN1	0.00900808	0.225481	0.532101
ANXA2P2	0.00901469	0.225481	-0.51626
MUC3A /// MUC3B	0.00902593	0.225481	0.667842
ADRA2A	0.00910161	0.226535	0.536885
BC069776	0.00909221	0.226535	0.387228
RBMS3	0.00912414	0.226678	0.469696
LOC732360 /// TDG	0.00916631	0.22699	-0.63606
EIF2AK2	0.00917031	0.22699	-0.725734
RGS14	0.00920593	0.227041	-0.36793
EVA1B	0.00920407	0.227041	0.484103
RPS11	0.00922627	0.227128	1.20953
RANGAP1	0.00930297	0.228599	-0.599
PIK3C3	0.00935426	0.229027	0.41396
TRPM2	0.00934351	0.229027	0.433259
RAD23B	0.00938917	0.229052	-0.312683
ASCC1	0.00938203	0.229052	-0.585686
ZKSCAN5	0.00948126	0.230117	-0.34546
ZFP69B	0.00945212	0.230117	0.465251
CPPED1	0.00948876	0.230117	-0.461739
GPATCH4	0.00950095	0.230117	0.421544
ZFP36	0.00959681	0.231304	-0.92832
TRAM2	0.00957396	0.231304	-0.337398
STAT4	0.00964546	0.231304	0.539673
SLC30A1	0.00965266	0.231304	-0.815003
TMEM176B	0.00961314	0.231304	-1.00404
SOAT1	0.0096506	0.231304	-0.556225
SLC20A1	0.00967853	0.231514	-0.974426
PTPRK	0.00987343	0.232377	-0.485983
BLM	0.00996967	0.232377	0.479541
HABP2	0.00997254	0.232377	0.566774
HAVCR1	0.00981671	0.232377	0.456028
PRTN3	0.00994385	0.232377	1.31192
PTGIS	0.00987445	0.232377	0.351732
HLA-DRA	0.00979739	0.232377	-0.512526
WDR45	0.00983914	0.232377	-0.710796
AMPD2	0.00984729	0.232377	-0.588636
HLA-DQB1 /// HLA-DRB1 /// HLA-DRB3 /// HLA-DRB4 /// LOC100996809 /// LOC101060835	0.00982329	0.232377	-0.72266
THTPA	0.0098464	0.232377	-0.623432
SUV39H1	0.00995616	0.232377	0.325542
DIABLO	0.00992966	0.232377	0.462776
SULT1E1	0.00974212	0.232377	0.568081
TAS2R16	0.00993418	0.232377	0.486599
MPPED2	0.0100118	0.23289	0.304816
SETD3	0.0100542	0.232919	-0.640671
DKFZP586I1420	0.010082	0.232919	-0.415356
NDUFA3	0.0100707	0.232919	-0.625579
ZCCHC2	0.0100639	0.232919	-0.44338
ELF4	0.0101159	0.233268	-0.657488
PLK4	0.0101316	0.233268	0.370364
CXCL12	0.0102309	0.233961	0.447346
SIM1	0.0102014	0.233961	0.677001
GJB4	0.0102132	0.233961	0.428549
CHAT	0.0102309	0.233961	0.917582
IRF9	0.0103142	0.23428	-0.759999
RANGRF	0.0102721	0.23428	-0.510749
LYVE1	0.0103078	0.23428	0.483733
IL22RA1	0.0103093	0.23428	0.471162
RAPGEF5	0.0103435	0.234551	0.356333
CST3	0.0103967	0.234576	-0.821795
GZMH	0.0103939	0.234576	-0.90343
AC003989.4	0.0103893	0.234576	0.428667
NPAS3	0.0104161	0.234624	0.590745
ARL4C	0.0104509	0.235016	-0.418017
CLPS	0.0105075	0.235049	0.523693
PCLO	0.010522	0.235049	0.266204
HEG1	0.0104837	0.235049	-0.518005
PRKCDBP	0.0104902	0.235049	0.560967
DDX23	0.0107911	0.235128	-0.673522
WWP2	0.0107596	0.235128	0.370442
THOC1	0.0107263	0.235128	-0.592744
KYNU	0.0107102	0.235128	-0.367479
ALDH3A1	0.010701	0.235128	0.514769
PFKFB2	0.0105678	0.235128	0.38577
TRIM37	0.0107306	0.235128	-0.6082
DIAPH2-AS1	0.0107	0.235128	0.354836
CRX	0.0106266	0.235128	-0.333635
MRPS2	0.0107835	0.235128	-0.505816
MAGEF1	0.0105629	0.235128	-0.449541
TOR3A	0.0106813	0.235128	-0.731419
DHRS9	0.0106713	0.235128	0.718088
NOD2	0.0107863	0.235128	-0.689624
KLF4	0.0106766	0.235128	-0.468704
C11orf68	0.0108039	0.235128	-0.855181
SYNE2	0.0108508	0.235769	-0.523183
PLS3	0.0109128	0.236309	0.311653
ARHGEF4 /// LOC101930241	0.0109757	0.236309	0.371286
BDNF	0.0109317	0.236309	0.455985
PAPOLA	0.0109522	0.236309	-0.246171
USP12	0.0109484	0.236309	-0.729104
ZDHHC8P1	0.0109806	0.236309	0.511958
AQP6	0.0110213	0.236433	0.440253
IRF7	0.011015	0.236433	-0.801661
DYNLL1	0.0112007	0.238458	-0.568194
TCTA	0.0111863	0.238458	0.41327
IMPDH1	0.0113447	0.238458	-0.445346
PPP2R5B	0.0111776	0.238458	-0.465186
NAGPA	0.0113315	0.238458	-0.567473
SLC18A1	0.0113741	0.238458	0.599094
BTN3A1	0.0114156	0.238458	-0.304556
EMR2	0.0113287	0.238458	-0.576488
ERVH-4	0.0111528	0.238458	1.32055
QRICH1	0.0114155	0.238458	-0.471068
KLHDC10	0.0113442	0.238458	-0.312698
PAK7	0.011245	0.238458	0.384601
PACS2	0.0113943	0.238458	-0.55147
SERPINB10	0.0112681	0.238458	0.729939
WDR83OS	0.0113914	0.238458	-0.398862
SLFN12	0.0112712	0.238458	-0.41886
CCDC15	0.0114108	0.238458	0.348209
PIGC	0.0114418	0.238637	-0.388528
LY6E	0.0119993	0.239883	-1.06112
AASDHPPT	0.0118988	0.239883	-0.378331
APBB1	0.0120519	0.239883	-0.574346
TPD52L1	0.0118995	0.239883	0.409582
COX10	0.0118563	0.239883	0.570562
KDELR3	0.0116358	0.239883	0.382122
LMO3	0.0117566	0.239883	0.82431
ADAM28	0.0118578	0.239883	0.392143
CDKN2A	0.0118062	0.239883	0.365263
CSF1	0.0118963	0.239883	0.360218
ABI2	0.0118706	0.239883	0.292938
GALNT10	0.0119773	0.239883	-0.401067
TBPL1	0.0116299	0.239883	-0.708562
TLX3	0.0120164	0.239883	1.14553
FOS	0.0120122	0.239883	-1.16069
CDC42EP2	0.0118564	0.239883	-0.380973
POLR2J	0.01193	0.239883	-0.618137
CBX7	0.0120194	0.239883	-0.567038
SDR39U1	0.0118153	0.239883	-0.734956
LRCH3	0.0115455	0.239883	0.329983
HSD3BP1 /// HSD3BP1	0.0116494	0.239883	0.504687
DNAJA1P4 /// DNAJA1P4	0.0115558	0.239883	0.627511
TSPAN13	0.012048	0.239883	0.460269
LOC101929864 /// SLX1A /// SLX1B	0.0117022	0.239883	-0.95964
TIMM8B	0.0120221	0.239883	0.629503
SLC48A1	0.0115443	0.239883	-0.308704
ABCA11P	0.0120421	0.239883	0.450206
ADAMTSL4	0.0119738	0.239883	0.486101
MROH9	0.0120168	0.239883	0.311953
HOXC8	0.0116576	0.239883	0.946017
MARK4	0.0118266	0.239883	-0.22619
CASP5	0.0121284	0.240986	-0.653375
EWSR1	0.0121429	0.240986	-0.258852
PSME1	0.0123799	0.244937	-0.535673
TFDP3	0.0124508	0.244937	0.515752
OR12D3 /// OR5V1	0.0124151	0.244937	0.626935
GRPEL1	0.0124332	0.244937	-0.517678
WDR74	0.0124347	0.244937	-0.410139
MIA2	0.0123815	0.244937	0.502737
RAB27A	0.0125405	0.245987	0.381949
SRGAP3	0.0125287	0.245987	-0.390666
RFTN1	0.0126223	0.247232	-0.302899
ENTPD5	0.0127762	0.247672	-0.390516
LLGL1	0.0127798	0.247672	0.330305
HIST1H3G	0.0127913	0.247672	0.340762
IGKV1-37 /// IGKV1-37 /// IGKV1D-37 /// IGKV1D-37	0.012766	0.247672	-1.09284
COA7	0.0127018	0.247672	1.26859
ZNF665	0.0127633	0.247672	0.427805
ULBP1	0.0126792	0.247672	0.445208
ZNF335	0.0127466	0.247672	0.251988
RALBP1	0.0129002	0.248134	-0.509419
ALG8	0.0128591	0.248134	-0.417615
HIST1H4A /// HIST1H4B /// HIST1H4C /// HIST1H4D /// HIST1H4E /// HIST1H4F /// HIST1H4H /// HIST1H4I /// HIST1H4J /// HIST1H4K /// HIST1H4L /// HIST2H4A /// HIST2H4B /// HIST4H4	0.0129294	0.248134	0.214928
CFP	0.0129211	0.248134	-1.21651
CLN3	0.0129589	0.248134	-0.53442
IER3IP1	0.0129988	0.248134	0.346866
LYZ	0.012994	0.248134	0.465101
HIST1H2BO	0.0129852	0.248134	-0.43921
ZNF394	0.0128659	0.248134	-0.799356
TRIM45	0.0128918	0.248134	0.373911
OPN3	0.0130545	0.248175	-0.280354
FAM118A	0.013056	0.248175	-0.303268
TMEM35	0.0130354	0.248175	0.344897
RPL39L	0.0131028	0.248714	-0.422244
NCBP1	0.013144	0.248797	0.233276
ATP10D	0.013142	0.248797	-0.354944
PRG2	0.0131736	0.248863	0.962744
CCDC177	0.0131843	0.248863	0.654727
CLDN8	0.0132214	0.249215	0.341801
MAPK1IP1L	0.0132576	0.249549	-0.528018
DLEU1	0.0133003	0.250004	0.502337
KEL	0.0133725	0.251013	-0.682705
FLT3	0.0134354	0.251495	0.587706
OR2H1	0.0134263	0.251495	-0.516752
SCD5	0.0134585	0.251578	0.608488
ATXN2L	0.0135245	0.252463	0.477034
MYO19	0.013551	0.252609	0.574854
KIAA0391	0.0135791	0.252784	-0.397337
TAAR5	0.0136253	0.253296	0.326643
AQP1	0.0136612	0.253434	0.490476
RSAD2	0.0136703	0.253434	-1.57148
ZFPM2	0.0137456	0.254481	0.360979
FARSA	0.0144734	0.25528	-0.513348
PLK1	0.0138832	0.25528	0.56785
TCOF1	0.0140095	0.25528	-0.362485
NAGA	0.0143107	0.25528	-0.363894
LOXL2	0.0140653	0.25528	0.346069
DHX8	0.0144547	0.25528	-0.990271
TRIM38	0.0140626	0.25528	-0.476986
ADA	0.0144275	0.25528	-0.545525
EPHB6	0.0142565	0.25528	0.521009
SH2B2	0.0143063	0.25528	0.403826
CGREF1	0.0140591	0.25528	0.315779
TGM3	0.0143936	0.25528	-0.419904
DIO1	0.0144654	0.25528	0.57831
IL18R1	0.0143031	0.25528	0.728411
ITGA10	0.01397	0.25528	0.360387
POU2F1	0.0142451	0.25528	-0.507047
NGF	0.0140851	0.25528	-0.4188
CDK16	0.014083	0.25528	0.328561
GAGE1 /// GAGE12B /// GAGE12C /// GAGE12D /// GAGE12E /// GAGE12F /// GAGE12G /// GAGE12H /// GAGE12I /// GAGE12J /// GAGE13 /// GAGE2A /// GAGE2B /// GAGE2C /// GAGE2D /// GAGE2E /// GAGE3 /// GAGE4 /// GAGE5 /// GAGE6 /// GAGE7 /// GAGE8	0.013832	0.25528	0.415993
LDLRAD4	0.0141658	0.25528	0.302212
HMHB1	0.0138547	0.25528	0.390166
FGR	0.0141817	0.25528	0.416176
COMT	0.0144107	0.25528	-0.287016
IKBKB	0.0141338	0.25528	-0.280698
ABCB7	0.014185	0.25528	-0.43541
TRPM3	0.0143724	0.25528	0.319781
WDR61	0.0140363	0.25528	-0.438064
MTMR7	0.0139166	0.25528	0.42615
ARL6IP4	0.0141176	0.25528	-0.456408
WDR12	0.0139386	0.25528	0.365076
INTS8	0.0143846	0.25528	-0.313766
DDX31	0.0144876	0.25528	0.44632
SH3TC2	0.0139791	0.25528	0.401906
MAGEL2	0.014368	0.25528	0.459674
DDX25	0.0143562	0.25528	0.488301
SLC28A3	0.0140634	0.25528	0.531599
PRDM14	0.0142601	0.25528	0.630526
ZNF318	0.0145268	0.255517	-0.328287
BICC1	0.0145388	0.255517	0.659704
GPHN	0.0145814	0.255932	0.561368
PSMG2	0.0146368	0.256572	-0.46424
CDKN1C	0.0147128	0.256903	-0.592007
TAF4B	0.0146922	0.256903	0.255145
CHRM4	0.014699	0.256903	1.01114
ACTL6A	0.01479	0.257919	-0.3695
BACE2	0.0148362	0.258062	0.651922
ATRAID	0.0148364	0.258062	-0.527427
RYBP	0.0148857	0.258354	-0.382502
GSPT2	0.0149019	0.258354	-0.586832
MPRIP	0.0149106	0.258354	-0.291461
ISOC1	0.0149584	0.258851	-0.38842
PHF20	0.0149867	0.259009	0.266307
FAM171A1	0.0150153	0.259172	0.565787
CCDC132	0.0150601	0.259614	0.516787
FAF1	0.0150899	0.259796	-0.578321
CDK5R2	0.0151453	0.260064	0.367404
NEUROD1	0.015176	0.260064	0.50514
HOXA6	0.0151305	0.260064	0.681065
WFDC1	0.0151824	0.260064	0.450415
ACP1	0.0154059	0.260563	-0.478247
KIF5B	0.0154694	0.260563	-0.255697
SCNN1A	0.0154711	0.260563	0.371016
APOBEC3G	0.015373	0.260563	-0.37796
APOM	0.0154489	0.260563	0.277233
SLC7A4	0.0154466	0.260563	0.283876
LOC101927458 /// LPHN2	0.0153394	0.260563	0.300479
NR6A1	0.0154365	0.260563	0.216204
DPAGT1	0.0153887	0.260563	-0.385144
GCFC2	0.0154722	0.260563	0.280712
NENF	0.0153807	0.260563	0.439975
HGSNAT	0.0152976	0.260563	-0.645212
AP4E1	0.0152478	0.260563	0.236052
AK021933	0.0154815	0.260563	0.511632
LMO7	0.0155615	0.260612	0.321911
DPH2	0.015559	0.260612	-0.557706
SCN10A	0.015552	0.260612	1.13279
LOC101060373 /// NOMO1 /// NOMO2 /// NOMO3	0.0155531	0.260612	-0.319379
PCOLCE2	0.0156801	0.262273	0.337028
FIG4	0.0157364	0.262889	0.431163
PRDX3	0.0158363	0.26376	-0.313082
MIR6732 /// ZC3H12A	0.0158268	0.26376	0.616412
IGF2-AS	0.0158471	0.26376	0.227476
HEATR2	0.0158772	0.263937	0.508758
FAM53B	0.0160804	0.263978	0.358842
CTDP1	0.0160069	0.263978	-0.469544
PDIA2	0.0161133	0.263978	-0.266165
BMP8A	0.0159937	0.263978	0.248849
FZD2	0.0161922	0.263978	-0.575719
GPR18	0.0161734	0.263978	-0.591891
GOLGA6L4 /// GOLGA6L5P /// GOLGA6L9 /// LOC102724093	0.0161371	0.263978	0.328588
DOK5	0.0161839	0.263978	0.575863
DERL1	0.0160464	0.263978	-0.41196
NDUFB2	0.0159313	0.263978	-0.450035
MRPL24	0.0159506	0.263978	-0.789431
FASTKD5	0.0159677	0.263978	-0.667534
SEMA3G	0.0160868	0.263978	0.657988
GTDC1	0.0160856	0.263978	0.281792
MIR4746 /// UBXN6	0.0161599	0.263978	-0.822714
P2RX2	0.0161153	0.263978	-0.364802
SI	0.0162992	0.265401	0.265901
HCCS	0.0163593	0.265841	-0.281133
CYP2D6 /// CYP2D7P /// LOC101929829	0.0163655	0.265841	0.538473
RPA2	0.0167654	0.266084	-0.297178
UBE3C	0.0166256	0.266084	-0.516695
IRF6	0.0166151	0.266084	0.8146
RANBP3	0.0165588	0.266084	-0.345959
EPHB4	0.016446	0.266084	-0.347709
CPQ	0.0166569	0.266084	-0.569257
ANAPC15	0.0167939	0.266084	0.349284
CALCRL	0.0167559	0.266084	0.444139
ICAM4	0.0166854	0.266084	-0.53054
EFNA5	0.0164617	0.266084	-0.362611
C6orf10	0.0166443	0.266084	0.576934
ATP6V1E1	0.0165673	0.266084	-0.423794
GIGYF2	0.0164381	0.266084	0.33551
RP11-680C21.1	0.0167757	0.266084	0.464023
TM9SF3	0.0167126	0.266084	-0.351478
NDC1	0.0166995	0.266084	0.40685
PUS1	0.0166886	0.266084	-0.527379
METRN	0.0167567	0.266084	0.595283
SIRT5	0.0164199	0.266084	0.425442
LRIF1	0.016718	0.266084	-0.362971
SF3B5	0.0165161	0.266084	-0.355784
RNPS1	0.0181247	0.266507	-0.500277
HYOU1	0.0183067	0.266507	-0.566468
RNF114	0.0187228	0.266507	-0.403204
ANP32B	0.018266	0.266507	-0.509311
PWP1	0.017069	0.266507	-0.27253
VARS	0.0181678	0.266507	-0.446142
CPD	0.017193	0.266507	0.334433
NDUFS2	0.0176914	0.266507	0.435662
ALDOC	0.0174301	0.266507	0.377313
IER2	0.0178403	0.266507	-0.65286
NUP214	0.0172975	0.266507	0.313699
CRIM1 /// LOC101929500	0.018514	0.266507	-0.30916
PSMB10	0.0181689	0.266507	-0.588401
RFXANK	0.0173568	0.266507	-0.334693
NDUFS1	0.0174904	0.266507	0.280366
ANXA8 /// ANXA8L1	0.0180132	0.266507	0.416557
TIMM17B	0.0174924	0.266507	-0.55077
LZTR1	0.0186196	0.266507	0.447501
ATOX1	0.0187958	0.266507	-1.01675
CAMLG	0.0183035	0.266507	-0.431021
ADK	0.0185686	0.266507	-0.340486
CCDC6	0.0186486	0.266507	0.219062
FGL2	0.0183666	0.266507	-0.563182
OAS2	0.0184372	0.266507	-0.65401
DCT	0.0182922	0.266507	0.289835
CTSG	0.0186146	0.266507	1.053
IL27RA	0.0172616	0.266507	-0.296022
KCNK3	0.0182341	0.266507	0.451477
DNAJA3	0.0175092	0.266507	-0.414934
IQCB1	0.0180977	0.266507	-0.451738
GPR64	0.017509	0.266507	-0.383334
DISC1 /// TSNAX-DISC1	0.0171193	0.266507	-0.341059
ELK3	0.0187622	0.266507	-0.316959
RLBP1	0.0181843	0.266507	0.531301
FOXF2	0.0186043	0.266507	0.501446
SEMG1	0.0171362	0.266507	0.422647
PSG11	0.017123	0.266507	-0.561306
RPL3L	0.0174798	0.266507	-0.504671
LOC729966 /// PDE4C	0.0176111	0.266507	0.316353
TAT	0.0173955	0.266507	0.368576
DNASE1L2	0.018774	0.266507	-0.646346
STAU1	0.018122	0.266507	-0.336817
TP53TG5	0.0168619	0.266507	0.342072
SLC5A2	0.0173244	0.266507	0.464174
GML	0.018178	0.266507	0.855063
C9orf38	0.0183178	0.266507	0.38132
PTN	0.0181157	0.266507	0.50628
TUB	0.017201	0.266507	0.384506
CLCN1	0.0183361	0.266507	-0.499676
TKT	0.0182333	0.266507	0.630965
PTRF	0.0178896	0.266507	0.222367
ERI3	0.0188257	0.266507	0.410759
KRT6A	0.017845	0.266507	0.409621
PRKRA	0.0185862	0.266507	-0.566286
HLA-DQB1 /// HLA-DRB1 /// HLA-DRB4 /// HLA-DRB5 /// LOC100996809 /// LOC101060835	0.0183414	0.266507	-0.519369
NR1D2	0.0182482	0.266507	-0.473616
TSPAN5	0.0174532	0.266507	-0.784569
SLCO1B1	0.0175402	0.266507	-0.428771
SSNA1	0.0183601	0.266507	-0.438107
GPR135	0.0186309	0.266507	0.247833
FBXO21	0.0188319	0.266507	-0.255626
ASCC3	0.0175894	0.266507	-0.697839
OIP5	0.0170585	0.266507	-0.47046
ZMYM6 /// ZMYM6NB	0.018738	0.266507	-0.34593
SERPINA4	0.0187638	0.266507	0.60702
LOC102724788 /// PRODH	0.0183518	0.266507	-0.535263
SPRYD7	0.0182599	0.266507	0.666466
SLC38A6	0.0172749	0.266507	-0.353773
NDST2 /// ZSWIM8-AS1	0.0171927	0.266507	0.614523
SLC26A10	0.0169302	0.266507	0.365163
GPR98	0.0187902	0.266507	0.705648
MTRF1L	0.0184012	0.266507	0.279236
RN7SKP150	0.0185107	0.266507	0.451958
RP1-68D18.4	0.0172165	0.266507	0.549925
POLR2J /// POLR2J2 /// POLR2J3 /// POLR2J4 /// UPK3BL	0.017539	0.266507	-0.623757
MUC7	0.0187313	0.266507	0.291982
SERHL2	0.0179032	0.266507	0.37402
NDRG3	0.0187307	0.266507	0.369091
SEC61A1	0.0176438	0.266507	-0.826124
GMPR2	0.0184137	0.266507	-0.485417
MCCC1	0.017449	0.266507	-0.608322
EIF2B3	0.0170286	0.266507	0.452532
SLC2A4RG	0.0174231	0.266507	-0.4329
DCP1A	0.0182375	0.266507	-0.294071
SCML1	0.0182516	0.266507	-0.576291
SLC35F2	0.0173278	0.266507	0.625553
ASB8	0.0182013	0.266507	0.604121
MYO5C	0.0182671	0.266507	0.452522
C12orf5	0.0177665	0.266507	-0.572421
TRPV2	0.017269	0.266507	-0.406715
RWDD1	0.0186308	0.266507	-0.659024
LY6G5C	0.0182841	0.266507	0.535203
XPNPEP3	0.0175362	0.266507	-0.414992
EML4	0.0175282	0.266507	0.334914
CALML5	0.0180086	0.266507	0.541479
UNKL	0.0169826	0.266507	-0.639622
PRORY	0.0179101	0.266507	0.413991
KCNIP1	0.0181404	0.266507	0.620611
MRPS15	0.0182908	0.266507	-0.646804
PAIP2B	0.0186283	0.266507	0.347675
LINC00623 /// LINC00869	0.0175306	0.266507	-1.05292
P4HTM	0.0172721	0.266507	0.523832
RALGDS	0.0189058	0.267039	0.484058
PRB4	0.0189091	0.267039	0.901382
CAMP	0.0189474	0.267301	0.60893
BMPR1A	0.0189967	0.267607	0.3103
ACADSB	0.019029	0.267607	0.31309
SHOX	0.0190513	0.267607	0.28688
LAMB4	0.0190681	0.267607	0.276046
TCP10L	0.0190604	0.267607	0.44799
SKIV2L	0.019096	0.267721	0.362348
LY6G6C	0.0191416	0.268082	0.498265
PEA15	0.0191714	0.268221	-0.39052
PHACTR4	0.0192178	0.268592	-0.611414
FCN1	0.0192893	0.26873	-0.522013
BMP10	0.01929	0.26873	0.600108
HAND1	0.019256	0.26873	0.478289
RALGPS2	0.0193072	0.26873	-0.274265
MMP9	0.0193883	0.26958	1.08572
EEF1B2 /// SNORA41	0.0194277	0.269702	0.525593
CSTF3	0.0194768	0.269702	0.364045
CNN1	0.0194563	0.269702	0.512339
OLIG2	0.0194615	0.269702	0.519908
RGS16	0.019521	0.269852	-0.28695
ZFYVE26	0.0195276	0.269852	-0.40086
F7	0.0195922	0.269917	0.499558
CCDC28B	0.0195622	0.269917	-0.311172
TRDN	0.0195798	0.269917	0.240872
LSM7	0.0196142	0.269945	-0.865764
TAS2R9	0.0196453	0.270097	0.479802
AFG3L2	0.0197988	0.270557	-0.530065
S100A12	0.019785	0.270557	0.666845
RPIA	0.0197587	0.270557	-0.848765
FKBP10	0.0197768	0.270557	-0.181693
CBLL1	0.0197427	0.270557	-0.354689
FANCE	0.0197022	0.270557	0.369707
ELANE	0.0198365	0.270799	1.49606
KIAA0319	0.0198955	0.270928	0.382349
FOXD1	0.0200446	0.270928	0.300301
GPR56	0.0200546	0.270928	-0.445289
CGGBP1	0.0199271	0.270928	0.501157
CRTAM	0.0199649	0.270928	-0.397658
PSG6	0.0199341	0.270928	0.377
APLNR	0.0200301	0.270928	0.457143
TMPRSS4	0.0198744	0.270928	0.202841
MIS18A	0.0200665	0.270928	-0.33894
RASAL1	0.0200661	0.270928	0.541382
IL22	0.0200376	0.270928	0.468718
KBTBD2	0.0201291	0.271501	0.340813
FBXO31	0.020169	0.271769	0.565915
STOM	0.0202627	0.272759	0.468112
TCP10	0.0203794	0.274057	0.550833
ARFIP1	0.0204091	0.274184	-0.396069
GAS1	0.0204645	0.27432	0.288216
RGS7	0.020486	0.27432	0.327864
AKAP5	0.0204686	0.27432	0.429599
HIST1H3F	0.0205727	0.27432	0.384217
EVC	0.0205782	0.27432	0.189606
C5orf28	0.0205816	0.27432	-0.309217
AMN	0.0205221	0.27432	0.414195
ASB6	0.020575	0.27432	-0.546838
GRK1	0.0206376	0.274494	-0.382336
INHA	0.020646	0.274494	0.653387
DOLPP1	0.0206556	0.274494	0.512293
GREM1	0.020712	0.274973	0.340536
AP3S1	0.0209617	0.275313	0.490222
DHRS3	0.0209615	0.275313	-0.487792
PRKAR2A	0.0209432	0.275313	0.245943
ARID5B	0.0208459	0.275313	0.31884
HSD17B8	0.0209221	0.275313	-0.400212
TBC1D31	0.0208865	0.275313	-0.432965
CYP2C9	0.0208485	0.275313	0.523466
TSPY13P /// TSPY13P	0.0207967	0.275313	0.484963
KALP /// KALP	0.0208341	0.275313	0.447282
EMC7	0.0209336	0.275313	-0.398538
EDEM2	0.0209537	0.275313	-0.818378
PTPRN2	0.0211193	0.277114	0.230875
GHRHR	0.0211417	0.277139	0.348834
DNAH17	0.0211743	0.277276	-0.545747
MRPS7	0.0211932	0.277276	-0.373394
DGKE	0.021287	0.278029	0.305914
ITGB6 /// LOC100505984	0.0212931	0.278029	-0.289189
TOMM22	0.0213125	0.278029	-0.632894
RPL37A	0.0214122	0.278066	0.371011
SND1	0.0213922	0.278066	-0.602851
BCL6	0.0214388	0.278066	0.438361
HFE	0.0213378	0.278066	0.23672
COX6A2	0.0213737	0.278066	0.342679
RPL36AL	0.0214268	0.278066	-0.533914
LRRC15	0.0214772	0.278297	0.790491
C4orf6	0.021506	0.278404	0.443392
NFE2L1	0.0217345	0.278506	-0.486481
IL4R	0.0217406	0.278506	0.48592
MPHOSPH6	0.0216816	0.278506	-0.62131
MAOA	0.0217008	0.278506	0.485643
B9D1	0.0216364	0.278506	0.214899
CTRC	0.0217277	0.278506	0.464324
KCNJ5	0.021681	0.278506	-0.200044
KCNE1	0.0216038	0.278506	0.319183
DNM3	0.0217068	0.278506	0.333241
ARL5A /// LOC101929356	0.0216564	0.278506	-0.41928
EXOSC5	0.0216937	0.278506	0.270718
DGKZ	0.0218853	0.279472	-0.406783
PRKAA2	0.0219706	0.279472	0.38452
DUSP5	0.021848	0.279472	-0.69784
GTF2I	0.0219665	0.279472	0.481841
FAM153A /// FAM153B /// LOC100507387 /// LOC102725213	0.0219184	0.279472	0.391209
SBNO1	0.0220228	0.279472	0.320579
RP1-149A16.17	0.0220066	0.279472	0.547857
ADCK3	0.0219899	0.279472	-0.473626
POGK	0.0219536	0.279472	-0.506861
ADAM30	0.0218766	0.279472	-0.435909
GABRB2	0.0220976	0.280158	0.882395
LPPR1	0.0221262	0.280258	0.515325
MAPK10	0.0222135	0.281001	0.258155
PAGE4	0.0222461	0.281001	0.616013
HNRNPA3 /// HNRNPA3P1	0.022268	0.281001	-0.278055
ADAMTS6	0.0222596	0.281001	0.443055
FKBP6	0.0222949	0.281078	0.395162
HTR2C	0.0223589	0.281622	0.235079
FOCAD	0.0224152	0.281806	-0.601927
DLL3	0.0224012	0.281806	0.624458
PEF1	0.0224394	0.281848	0.479585
CLTB	0.0225276	0.282169	-0.486856
GIMAP4	0.0225185	0.282169	-0.502188
ADAT1	0.0225033	0.282169	-0.377158
COX6A1	0.0225856	0.282592	-0.403791
SCCPDH	0.0226031	0.282592	-0.373603
KIAA0020	0.0226664	0.282774	-0.388523
NKX3-1	0.0227146	0.282774	0.347102
KCNJ13	0.0227223	0.282774	0.227844
UXT	0.0226634	0.282774	-0.410846
CHMP4A /// TM9SF1	0.022719	0.282774	-0.358822
NLGN4Y	0.0227565	0.282938	0.433014
UBE2C	0.022873	0.283344	0.750653
CST7	0.0228507	0.283344	0.55728
NHLH1	0.0228579	0.283344	0.665272
PURG	0.0228599	0.283344	0.338643
FABP5	0.0229136	0.283476	-0.624684
SPINT1	0.022942	0.283476	0.350954
ANKRD11	0.0229465	0.283476	-0.560121
SLC22A18AS	0.0230458	0.284394	0.341297
ZNF331	0.0230629	0.284394	0.296901
PKD2	0.0231408	0.284919	-0.402415
CD79A	0.023182	0.284919	0.467795
CD1C	0.0231899	0.284919	-0.601974
GUCA2B	0.0231518	0.284919	0.329699
ARHGAP5	0.023255	0.28546	0.316268
TG	0.0234314	0.285517	0.577243
B3GALT5	0.0233671	0.285517	0.447164
CEP250	0.0234136	0.285517	0.295165
SERPINB3	0.0234712	0.285517	0.274019
MYL4	0.023492	0.285517	-0.687945
CENPB	0.0234774	0.285517	-0.296961
METTL21B	0.0234888	0.285517	0.533109
IMPACT	0.0233398	0.285517	0.257635
DPEP2	0.0234647	0.285517	-0.954017
C8orf44-SGK3 /// SGK3	0.0232973	0.285517	-0.443147
ASB12 /// MTMR8	0.0233764	0.285517	0.396202
MKRN1	0.0235278	0.285695	-0.773108
DMD	0.0235762	0.286026	0.277478
PHF11	0.0236082	0.286157	-0.64777
ZWINT	0.0237457	0.286674	-0.357739
ZKSCAN8	0.023721	0.286674	0.495672
STAG2	0.0237282	0.286674	-0.384157
SPPL2B	0.0237569	0.286674	0.324416
GP6	0.0236777	0.286674	-0.284912
SEC14L5	0.0238091	0.287047	0.384282
VEGFC	0.0238587	0.287389	0.544509
ZNF343	0.0238854	0.287454	0.516753
PSG3	0.0239165	0.287489	0.482363
TMEM184C	0.0239308	0.287489	-0.337491
VPS28	0.0240256	0.288372	-0.539846
HIST1H1T	0.0240666	0.288607	-0.576788
TUBGCP3	0.0241234	0.288738	-0.278175
P2RY6	0.0241416	0.288738	0.63036
ADAMTS9	0.0241259	0.288738	0.297932
FDX1	0.0243353	0.290013	-0.323914
FILIP1L	0.0244835	0.290013	0.457972
TAGLN3	0.0245067	0.290013	0.428688
GNAO1	0.0244854	0.290013	0.433378
PDK4	0.0243828	0.290013	0.507625
PFKM	0.0245272	0.290013	0.391577
CREB3L2	0.0244341	0.290013	-0.290215
TMEM30B	0.0243227	0.290013	0.559802
KCNMA1	0.0243902	0.290013	0.322972
MYH14	0.0245012	0.290013	0.202594
S100A6	0.0244597	0.290013	-0.746542
ZMAT3	0.0243919	0.290013	0.467439
COLEC11	0.0244614	0.290013	0.550503
GPR45	0.0245846	0.290333	0.205638
MINOS1-NBL1 /// NBL1	0.0245972	0.290333	0.462707
TGFB2	0.0246276	0.290438	0.22811
ZNF195	0.0247295	0.290761	0.384004
RBM25	0.0247279	0.290761	-0.290111
CLEC16A	0.0247841	0.290761	-0.536912
STEAP1B	0.0247162	0.290761	0.537094
MRPS28	0.0247567	0.290761	-0.64763
WDR13	0.0247761	0.290761	-0.790926
HLA-DRB1 /// HLA-DRB4 /// LOC100996809	0.0249407	0.292344	-0.418438
AMPD3 /// CAND1.11	0.0249807	0.29256	0.632625
NPTN	0.0250502	0.292578	0.399453
HSPB2	0.0250459	0.292578	-0.238296
MT3	0.0251121	0.292578	0.340191
HLA-DMA	0.0251103	0.292578	-0.419754
AUNIP	0.0251055	0.292578	0.314581
MEX3D	0.0251008	0.292578	0.252463
ERBB2	0.025136	0.292604	0.297968
RPL34	0.0253604	0.292695	1.13056
RIN1	0.0251955	0.292695	-0.351648
AP3D1	0.025329	0.292695	-0.437176
HSF2BP	0.0252332	0.292695	0.277119
C6orf123	0.0252141	0.292695	0.508888
MCM7	0.0252871	0.292695	-0.458878
RIMBP2	0.0253452	0.292695	0.643509
UBQLN2	0.0253532	0.292695	0.472188
NOC3L	0.0252313	0.292695	-0.42055
ADAM29 /// LOC101928551	0.0253039	0.292695	0.589548
LILRB4	0.025391	0.292799	-0.389775
ATG2A	0.0254371	0.293017	0.318122
MYOZ1	0.0254533	0.293017	1.22473
ACOT1 /// ACOT2	0.0255021	0.293329	-0.381899
LOC647070	0.0256236	0.294475	0.453814
C14orf169	0.0256662	0.294714	-0.2616
DKK1	0.0257437	0.295177	0.451442
RPL15	0.0257502	0.295177	0.339538
ARMC4	0.0257757	0.29522	-0.515704
MFSD7	0.0258421	0.295729	-0.36661
PRB3	0.0259448	0.296152	0.382323
CLCF1	0.0259175	0.296152	0.565395
PRDM16	0.025937	0.296152	-0.419495
CD5	0.0259698	0.296187	0.855066
CBS	0.0261001	0.297224	0.370401
KIAA1661	0.0261267	0.297224	0.432181
SEC61A2	0.0261076	0.297224	0.466872
CYCS	0.0261886	0.297555	-0.405364
IGF2BP2	0.0261998	0.297555	-0.682141
M6PR /// PHC1	0.0263882	0.299233	-0.363082
PSMA1	0.0266227	0.299233	0.253438
COX5B	0.0264797	0.299233	-0.304834
C6orf47	0.0264902	0.299233	0.448966
ZNF365	0.0266288	0.299233	0.383913
BDH1	0.0266302	0.299233	0.432342
IGHG1	0.0264451	0.299233	0.420052
DDX58	0.026595	0.299233	-0.665217
EDN1	0.0266354	0.299233	0.580333
ZFHX4	0.0265594	0.299233	0.631409
NOX5	0.0266292	0.299233	0.591933
MFSD11	0.0265189	0.299233	0.420606
FAM174B	0.0264923	0.299233	0.240498
ACTR3P2 /// ACTR3P2	0.0266883	0.299578	0.313129
PEX11B	0.0268048	0.299736	0.397088
CDY1 /// CDY1B /// CDY2A /// CDY2B	0.0268132	0.299736	0.584353
MUC1	0.026813	0.299736	0.408636
MAX	0.0267402	0.299736	-0.314261
RUNX1-IT1	0.0267667	0.299736	-0.503089
BMP15	0.0268569	0.299976	0.472166
HDHD1	0.0270256	0.299983	-0.458755
USH1C	0.0270795	0.299983	0.420779
LOC100509646 /// PRY /// PRY2	0.0270791	0.299983	0.547394
HIST1H4G	0.0270525	0.299983	-0.260617
PIGK	0.027061	0.299983	-0.467924
RP1-181J22.1	0.0270013	0.299983	0.405747
FAM188A	0.0269111	0.299983	-0.481818
RNF216	0.0270056	0.299983	-0.276603
ADAP1	0.0270191	0.299983	-0.402131
DEC1	0.0270225	0.299983	0.367974
CPA1	0.0272369	0.300005	0.258848
NCOA1	0.0271658	0.300005	-0.340812
RSL1D1	0.0271697	0.300005	-0.305247
RP3-406P24.1	0.0272182	0.300005	-0.564597
RTFDC1	0.027216	0.300005	0.312436
ODAM	0.0271711	0.300005	0.428322
TMEM222	0.0271651	0.300005	-0.661514
TMBIM6	0.0275061	0.300036	0.250759
ECHS1	0.0272907	0.300036	-0.616937
DECR1	0.0275303	0.300036	-0.266307
DNAJB9	0.0275286	0.300036	-0.332868
GOLGA2	0.0275788	0.300036	-0.367951
CFTR	0.0273944	0.300036	0.261222
CSRP2	0.0273599	0.300036	-0.270544
CFHR4	0.0274006	0.300036	0.245076
SRGAP2 /// SRGAP2B /// SRGAP2C	0.0274867	0.300036	-0.469896
ALG5	0.0274587	0.300036	-0.307672
TMEM258	0.0275526	0.300036	-0.470614
WARS2	0.0273353	0.300036	-0.398314
CHST12	0.0275662	0.300036	-0.697963
AIDA	0.0274699	0.300036	-0.465143
GABRQ	0.0275392	0.300036	0.501328
HS3ST3B1	0.0275948	0.300036	0.376397
SNX17	0.0277164	0.300636	-0.606692
WDR77	0.0276981	0.300636	-0.325645
COMMD3	0.0277168	0.300636	0.435437
FUT6	0.0278012	0.30131	0.41007
MCFD2P1 /// MCFD2P1	0.0278268	0.301345	-0.245447
PDK1	0.0279147	0.301572	0.307107
KLHDC3	0.0279144	0.301572	0.398704
ZKSCAN4	0.0278988	0.301572	-0.403254
MPDZ	0.0279551	0.301602	0.228898
CTSV	0.0279621	0.301602	-0.473854
CYP27B1	0.0280231	0.302019	0.50694
APP	0.0281374	0.302558	0.265057
CAP1	0.0285015	0.302558	0.306966
CRK	0.0285928	0.302558	-0.3808
KEAP1	0.0282694	0.302558	-0.584729
NOTCH3	0.0287158	0.302558	0.311349
LMNB1	0.0282568	0.302558	-0.432429
RGS3	0.0286053	0.302558	0.383867
CRCP	0.0284122	0.302558	0.285497
SYNGR1	0.0282437	0.302558	-0.31739
NOTCH4	0.028534	0.302558	0.597202
CHST7	0.0285176	0.302558	-0.677299
GNG7	0.0283979	0.302558	-0.356646
TLR6	0.0283083	0.302558	0.351601
SULT1B1	0.0287413	0.302558	0.403467
MYCLP1 /// MYCLP1	0.0285572	0.302558	0.426167
NAB1	0.0286357	0.302558	0.197984
TPT1P8	0.028262	0.302558	0.42627
SYNCRIP	0.0286028	0.302558	-0.268966
URI1	0.0287346	0.302558	-0.332742
FCF1 /// MAPK1IP1L	0.0287388	0.302558	-0.641133
HAUS5	0.028122	0.302558	0.275372
SLC35D2	0.028199	0.302558	-0.430414
TMEM159	0.0287004	0.302558	-0.336388
LINC01314	0.0286198	0.302558	0.512524
LOC101929304 /// SNX29	0.028219	0.302558	0.434302
TUBB4BP7 /// TUBB4BP7	0.0283405	0.302558	0.43958
TIMM10B	0.0287447	0.302558	-0.249567
SAP30L	0.0286843	0.302558	-0.396797
ELL3	0.0282883	0.302558	0.39514
PRSS21	0.0284462	0.302558	0.827174
SLC24A2	0.0288672	0.303611	0.600875
FAM86B1 /// FAM86B2 /// FAM86C1 /// FAM86DP /// FAM86FP	0.0289544	0.304291	-0.306908
MAPKAP1	0.0289824	0.304349	-0.343884
RDH11	0.0290542	0.304821	-0.271889
C2orf47	0.0290724	0.304821	-0.382182
RAB13	0.0291298	0.30495	0.46611
CELF1	0.0291267	0.30495	-0.335337
CPT2	0.0293183	0.306211	-0.42436
BTN3A3	0.029304	0.306211	-0.374406
PTRH2	0.0292955	0.306211	-0.32846
DDX1	0.0293707	0.306521	-0.590334
CHAF1A	0.0294515	0.307128	-0.266288
SPOCK2	0.0295047	0.30724	0.322308
TRAF3IP3	0.0295078	0.30724	-0.344389
KCNB1	0.0295805	0.30776	0.392507
CPSF1 /// MIR1234 /// MIR6849 /// MIR939	0.0296037	0.307764	-0.612693
CD177	0.0296361	0.307864	1.09484
RBM42	0.0296952	0.308005	-0.32905
ZNF529	0.0296888	0.308005	-0.293768
CCR1	0.0297783	0.308158	-0.599151
PER2	0.0297621	0.308158	0.229386
HDAC6	0.0297602	0.308158	0.227674
ABLIM3	0.029909	0.308953	0.426503
EPPK1	0.0299167	0.308953	0.448549
MRPL20	0.0299237	0.308953	-0.271765
BV03S1J2.2 /// IL23A /// TCRB /// TCRVB /// TRBC2 /// TRBC2 /// TRBJ2-7 /// TRBJ2-7 /// TRBV19	0.0300303	0.309518	-0.556883
NARS2	0.0300039	0.309518	0.42843
MS4A5	0.0300562	0.309518	0.616316
NBEA	0.0300701	0.309518	0.294361
TNF	0.0301924	0.310174	-0.611169
BICD2	0.0302027	0.310174	-0.379899
CPNE7	0.0301601	0.310174	0.620721
PI15	0.0303411	0.31092	0.381435
JADE2	0.0303237	0.31092	0.214936
LINC00894	0.0303903	0.31092	0.666236
PRPS1L1	0.0303469	0.31092	0.490763
FLJ23519 /// RNH1	0.0303763	0.31092	0.56629
VSIG4	0.0304214	0.311002	0.528133
ERCC4	0.0304452	0.311011	0.535943
IPO7	0.0305193	0.311062	-0.247024
PPIH	0.0305109	0.311062	-0.576576
MILR1	0.0304913	0.311062	-0.450228
NFIB	0.0306043	0.311693	0.214779
BSDC1	0.030665	0.312067	-0.341205
BRD9	0.0306872	0.312067	0.637732
ASGR2	0.0307718	0.312692	-0.428541
MAOB	0.0308742	0.312834	0.34495
CENPQ	0.0308643	0.312834	0.324342
SLC35G2	0.0308784	0.312834	0.396802
SLC22A7	0.0308261	0.312834	-0.2304
SORL1	0.0309207	0.312838	0.487389
NQO2	0.030925	0.312838	0.526639
RPL21 /// RPL21P28 /// SNORA27 /// SNORD102	0.0311432	0.313636	0.289173
INTS3	0.0311283	0.313636	0.332935
RCE1	0.0311248	0.313636	-0.318043
IFI44	0.0310769	0.313636	-0.770849
CDK5RAP3	0.0310676	0.313636	-0.643654
TLR7	0.0310819	0.313636	-0.398096
TDP2	0.031178	0.313738	0.402423
PRKACA	0.0312137	0.313738	-0.419288
CH25H	0.0312452	0.313738	-0.41731
GCSH /// LOC101060817	0.0312462	0.313738	-0.301432
CYP3A5	0.031424	0.314859	0.254803
NOL8	0.0314241	0.314859	-0.545259
PEAK1	0.0314277	0.314859	0.389293
S100A4	0.0314949	0.315065	-0.567853
HPGD	0.0314773	0.315065	0.359934
FAM50A	0.0315848	0.315403	-0.366006
KLK6	0.0316166	0.315403	-0.427548
CRABP1	0.031622	0.315403	-0.472314
HSD17B1	0.0315682	0.315403	0.256688
TCEB2	0.0319167	0.316009	-0.288964
CKB	0.0317575	0.316009	-0.385798
PSMD1	0.0318472	0.316009	-0.435057
CDKN1A	0.0320349	0.316009	-0.320684
C16orf62	0.031884	0.316009	-0.297666
ABCC4	0.0320798	0.316009	0.474314
PGC	0.0319365	0.316009	0.506761
FOXO4	0.0319715	0.316009	-0.405399
ZNF177 /// ZNF559-ZNF177	0.0317935	0.316009	0.344405
RNF5 /// RNF5P1	0.0320442	0.316009	-0.604425
SFN	0.0320802	0.316009	0.455822
GATA3	0.0319131	0.316009	-0.267913
PIGO	0.0320139	0.316009	0.329084
CYP11B1	0.031922	0.316009	0.309529
GTF3C5	0.0320731	0.316009	0.662524
CYTL1	0.0318398	0.316009	0.352024
SPX	0.0318261	0.316009	0.669316
NCAPD2	0.0321243	0.316196	0.537182
AKR1B10	0.032146	0.316196	0.570187
TRADD	0.032249	0.316518	-0.406027
ATP6V1G2-DDX39B /// DDX39B /// SNORD84	0.0322424	0.316518	-0.429869
CRIPT	0.0322311	0.316518	-0.347435
MIR5193 /// UBA7	0.0324238	0.316929	-0.516463
ISG20	0.0324064	0.316929	-0.789436
CYLC2	0.0324316	0.316929	0.314649
PCCB	0.0324074	0.316929	-0.527145
ZNF79	0.0323529	0.316929	0.310038
CMA1	0.0324065	0.316929	0.454883
RCAN2	0.0325488	0.316994	0.46242
FZD6	0.0325243	0.316994	0.260154
UST	0.032579	0.316994	0.266002
OR7E24	0.0325122	0.316994	0.361327
ZNF232	0.0325658	0.316994	-0.32722
LOC100507577 /// LONP2	0.0324717	0.316994	-0.590711
SERPINB4	0.0326153	0.317119	0.345604
NTN1	0.0326419	0.317149	0.444108
MRPL52	0.0327052	0.317309	0.35426
RNF126P1	0.0326884	0.317309	-0.283773
NCOA3	0.0327317	0.317338	-0.344994
PTDSS1	0.0331425	0.317364	-0.330432
STAG1	0.0330955	0.317364	-0.378017
BCAM	0.0330268	0.317364	0.527593
SLC2A5	0.0328874	0.317364	0.248804
MTMR11	0.033157	0.317364	-0.510226
GAST	0.0331063	0.317364	0.401945
CAPN2	0.0329489	0.317364	-0.236719
IFRD2	0.0331531	0.317364	0.448138
FAM168B	0.0328639	0.317364	-0.641427
GLTSCR1L	0.0330398	0.317364	-0.586687
MBOAT2	0.0328324	0.317364	0.730318
ATAD2B	0.0329212	0.317364	0.36028
CNDP2	0.0328519	0.317364	-0.524561
SCNM1 /// TNFAIP8L2-SCNM1	0.0331805	0.317364	-0.864716
TTC17	0.0329725	0.317364	0.326461
CCDC121	0.0328193	0.317364	0.314786
CLEC1B	0.0331401	0.317364	0.639765
FAM131A	0.0328319	0.317364	0.285379
AF198444	0.0331613	0.317364	-0.35595
IFI44L	0.0332894	0.317519	-1.27075
CCNA1	0.0333073	0.317519	0.669364
CHRNA2	0.0332823	0.317519	0.477066
FBXO2	0.0333142	0.317519	-0.392514
LRRC8E	0.033287	0.317519	-0.332541
YIPF6	0.0333628	0.317758	-0.301151
RNH1	0.0334123	0.318005	-0.453767
CMAHP	0.0334977	0.318461	0.234057
MAP3K1	0.0335073	0.318461	-0.979002
RASGRF1	0.0336449	0.31932	0.263607
CCPG1	0.033625	0.31932	0.289564
TRIP6	0.0336941	0.319338	-0.41148
CCDC87	0.0336907	0.319338	0.486399
PDE1C	0.03379	0.320022	0.381131
DAZ1 /// DAZ2 /// DAZ3 /// DAZ4	0.0339083	0.320022	0.236355
ADCY3	0.0338765	0.320022	0.350482
KIR2DL5A	0.0338982	0.320022	0.604974
IGHA1 /// IGHA2 /// IGHD /// IGHG1 /// IGHG3 /// IGHM /// IGHV4-31	0.033886	0.320022	0.666162
FAM46A	0.0338669	0.320022	-0.501254
PNKP	0.0339544	0.320232	-0.361117
GATA1	0.0339912	0.320356	0.527454
PPIL2	0.034025	0.320452	-0.280493
CSF1R	0.0342256	0.320868	-0.459039
SFRP4	0.0343303	0.320868	0.329216
CYP24A1	0.0342034	0.320868	0.259171
FAM107A	0.0342741	0.320868	0.246497
CHP1	0.0343215	0.320868	-0.406997
FLII	0.0343131	0.320868	-0.553903
RAB11B	0.0342772	0.320868	0.338648
SCAMP2	0.0341319	0.320868	0.454054
ANKRD49	0.0342177	0.320868	-0.535657
ARPC5L	0.0341199	0.320868	0.377668
DENND2D	0.0341562	0.320868	-0.571003
LRRFIP1	0.0344366	0.321416	0.21524
PPDPF	0.03442	0.321416	0.522087
MRPS18B	0.0344811	0.32161	-0.388517
SART3	0.0345752	0.321838	-0.394406
PES1	0.0345968	0.321838	-0.563174
PSG11 /// PSG3	0.0346119	0.321838	0.341879
TSPAN15	0.0346246	0.321838	-0.403898
C2orf68	0.0346103	0.321838	-0.431599
ECI1	0.0347335	0.322628	-0.489755
MARCKSL1	0.0349375	0.322842	-0.559246
EIF3H	0.0350724	0.322842	0.401916
MIR943 /// NELFA	0.0348288	0.322842	-0.350208
SPA17	0.0351038	0.322842	0.288489
TNK1	0.0349939	0.322842	0.511848
PDZD2	0.0351149	0.322842	0.245966
GGTLC2	0.0350507	0.322842	-0.492124
KCTD2	0.0350851	0.322842	-0.229615
CYP2U1	0.0347879	0.322842	0.344409
LAP3	0.0348552	0.322842	-0.705859
RPS6KC1	0.0349903	0.322842	-0.491221
KLHL29	0.0348222	0.322842	0.439909
PGLYRP4	0.0350195	0.322842	0.497696
CER1	0.0351111	0.322842	0.417707
KCNAB3	0.0350176	0.322842	-0.396719
ICMT	0.0351662	0.322927	-0.29921
SLC12A5	0.0351719	0.322927	0.909642
CNPY2	0.0352823	0.323281	-0.417547
SEMA7A	0.0352678	0.323281	0.44857
FBXW4	0.0352819	0.323281	-0.316404
HTR1B	0.0353074	0.323293	0.577264
EIF3B	0.0354849	0.324039	-0.283111
ZCCHC24	0.0354512	0.324039	0.291436
RHBDF1	0.0354716	0.324039	-0.36609
MTCH1	0.0354356	0.324039	0.27484
MBOAT7	0.0355406	0.324134	0.584321
NTAN1	0.0355432	0.324134	-0.44231
LGALS2	0.0356513	0.324683	-0.50628
LOC730101	0.0356515	0.324683	0.385783
PRMT1	0.0356791	0.324716	-0.828304
PDX1	0.0357399	0.32505	0.213043
PSMD10	0.0358642	0.325748	-0.302869
PTCH2	0.0358649	0.325748	0.467723
MEP1A	0.0359577	0.326373	0.263369
KIAA0196	0.0362919	0.327244	-0.369582
NR1H3	0.0362099	0.327244	-0.364557
MAPK7	0.0362196	0.327244	-0.284863
ACSM2A /// ACSM2B	0.0362184	0.327244	0.270355
UBE2Q1	0.0361572	0.327244	-0.313701
POGLUT1	0.036293	0.327244	-0.456015
SIGLEC5	0.036318	0.327244	0.616963
KDM8	0.0363201	0.327244	0.343003
CRYL1	0.0361437	0.327244	0.450143
APOL2	0.0362724	0.327244	-0.478291
WNT5B	0.036129	0.327244	0.21363
HPS6	0.0363518	0.327312	-0.235531
PNPO	0.0363991	0.327519	0.298246
BCLAF1	0.0365627	0.328288	-0.353302
CRTAP	0.0365917	0.328288	0.556797
GADD45A	0.0365709	0.328288	0.670488
GLRA3	0.0366107	0.328288	0.192561
PMPCA	0.0366302	0.328288	-0.32098
AIM1	0.0366103	0.328288	0.293484
PGRMC1	0.0368105	0.328596	-0.373019
KIFAP3	0.0367532	0.328596	-0.570402
MLX	0.0367848	0.328596	-0.305785
DCUN1D2	0.0367446	0.328596	0.349359
MARK1	0.0367116	0.328596	0.259352
APOL3	0.0367875	0.328596	-0.459385
ARSA	0.0368846	0.32904	-0.555963
JUP	0.0369653	0.329108	-0.712519
PIK3C2G	0.0369613	0.329108	0.399324
MAFB	0.0369415	0.329108	-0.683937
MMP10	0.037008	0.329271	0.389595
TRIM13	0.0374074	0.329538	-0.258369
MMP19	0.0373711	0.329538	0.55114
GALNT8 /// KCNA6	0.0373837	0.329538	0.725185
BLNK	0.0371748	0.329538	-0.430157
CLEC2B	0.037326	0.329538	0.946896
GRIK5	0.0374281	0.329538	0.431493
AK291611 /// TRGV7 /// TRGV7	0.0371513	0.329538	0.486225
TTTY2 /// TTTY2B	0.0372582	0.329538	0.581651
PTEN /// PTENP1	0.037088	0.329538	-0.346631
DYNLRB1	0.0373904	0.329538	-0.434662
SMO	0.0374256	0.329538	-0.415538
SIRT7	0.0374263	0.329538	0.21345
ANKFY1	0.0370915	0.329538	0.416067
TCF7L1	0.0374182	0.329538	0.463439
HTR3B	0.0373475	0.329538	0.501829
WNT6	0.0371983	0.329538	0.253708
ITPKB	0.0374557	0.329566	-0.484644
ACTA1	0.0376949	0.331025	0.303192
SSUH2	0.037685	0.331025	0.462674
PHOX2B	0.0376554	0.331025	-0.342164
CYC1	0.0378968	0.33215	-0.530457
PSMC4	0.0378737	0.33215	-0.605316
DONSON	0.0378588	0.33215	0.30839
PRICKLE3	0.0379269	0.332198	0.445865
APOBR	0.037954	0.33222	0.300158
MIR6805 /// RPL28	0.0387367	0.3324	-0.291884
UBE2D3	0.0385349	0.3324	-0.343434
PFKL	0.0386332	0.3324	-0.286286
TRAP1	0.0381808	0.3324	-0.38541
EIF2B1	0.0387377	0.3324	-0.6079
PPP2R5C	0.0380037	0.3324	-0.240614
SNX2	0.0386591	0.3324	-0.367606
CHPF	0.0384307	0.3324	0.629855
MYLK	0.0382111	0.3324	0.603578
STC2	0.0384728	0.3324	0.345591
GALK1	0.03859	0.3324	-0.251589
ACPP	0.0386447	0.3324	-0.371199
POLA1	0.0388251	0.3324	0.287469
ZNF239	0.0388354	0.3324	0.396163
GALNS	0.0387947	0.3324	-0.440481
ASS1	0.0384401	0.3324	0.611984
PTGER1	0.0382287	0.3324	0.194848
RGS5	0.0383194	0.3324	0.268271
SMC3	0.0385333	0.3324	-0.274495
ACE	0.0382096	0.3324	-0.310437
EMR3	0.0382169	0.3324	-0.748651
NAAA	0.0387403	0.3324	-0.31656
LOC100131510	0.0387631	0.3324	0.412363
RP11-116O18.1	0.0385283	0.3324	0.278945
DUS1L	0.0381273	0.3324	-0.243568
FAM208B	0.0382141	0.3324	0.292831
TBC1D13	0.0385664	0.3324	0.28272
IER5	0.0385776	0.3324	-0.453625
POLR3B	0.0381493	0.3324	0.397616
CUZD1	0.0386722	0.3324	0.547447
GPR88	0.0382969	0.3324	0.238561
TNIP3	0.0388038	0.3324	0.466309
TDRD1	0.0381627	0.3324	0.362434
GPR27	0.0383423	0.3324	0.501313
P2RY4	0.0383157	0.3324	0.268536
RBM8A	0.0388914	0.332631	-0.241687
KCNMB4	0.0389607	0.332631	0.418604
GMEB1	0.0389173	0.332631	-0.54242
RRAGD	0.0389425	0.332631	-0.385019
ARHGEF1 /// LOC100505585	0.0391279	0.332785	0.204103
COX17 /// POPDC2	0.03916	0.332785	-0.424428
NEFH	0.0390358	0.332785	-0.299056
MC2R	0.0392064	0.332785	0.371788
TARP /// TRGC2 /// TRGV9	0.0392039	0.332785	-0.490753
PAX1	0.0391565	0.332785	-0.496105
C14orf166	0.0391809	0.332785	-0.450082
TSSC1	0.0390216	0.332785	-0.398597
PHLDA1	0.0392184	0.332785	0.264383
AGPAT3	0.0392251	0.332785	-0.469196
AKAP2 /// PALM2-AKAP2	0.0392513	0.332799	-0.358269
PTPRG	0.0392859	0.332883	0.248992
RBM19	0.0393635	0.333332	0.333622
ZFYVE16	0.0395258	0.333453	0.519686
GMPR	0.0395207	0.333453	-0.916034
FGFBP1	0.0395008	0.333453	0.881512
ASXL3	0.0394141	0.333453	0.480172
PLA1A	0.0395164	0.333453	0.504426
KRTAP1-3	0.039428	0.333453	0.366203
ZFPL1	0.0396226	0.334061	-0.26571
ABCF2	0.0396629	0.334192	-0.237031
SYT5	0.0397326	0.334571	0.283349
DAO	0.0397687	0.334666	-0.365159
MAML1	0.0398213	0.3349	-0.285939
PAK3	0.0398879	0.335055	-0.309848
G6PC3	0.0398893	0.335055	-0.340888
PIK3CD	0.0399607	0.33516	0.280101
ARHGAP4	0.0399538	0.33516	-0.582083
RUSC1	0.0399762	0.33516	0.694739
SLC2A9	0.0400492	0.335564	0.348652
SCFD1	0.0400942	0.335733	-0.409906
PCNT	0.0401755	0.335969	-0.666489
FRRS1L	0.0402218	0.335969	0.247722
RRN3P1	0.0402161	0.335969	0.33773
SECISBP2	0.0402076	0.335969	-0.292495
TBR1	0.0402545	0.336035	0.560766
DNPEP	0.0404183	0.336317	-0.305707
COL11A1	0.040386	0.336317	0.32377
SLC17A3	0.0405372	0.336317	0.315956
KLHL18	0.0403924	0.336317	0.375824
KCNJ6	0.0405074	0.336317	0.259822
OXR1	0.0404015	0.336317	-0.370514
C11orf1	0.0405283	0.336317	0.586973
HEATR3	0.0404139	0.336317	-0.293312
DNAJC10	0.0405105	0.336317	-0.371294
RP11-10N23.4	0.0405342	0.336317	0.371003
SH2D3C	0.0405715	0.336395	-0.475485
NPLOC4	0.0406257	0.336432	-0.577837
NEUROD6	0.0406107	0.336432	0.506365
PPP1R12B	0.0406801	0.336675	-0.243481
ORC4	0.0407401	0.336966	-0.246409
NXT2	0.0407681	0.336991	0.308133
ACSL1	0.0407939	0.336998	0.575486
DKFZP434C153 /// OBSCN	0.0408323	0.337109	0.458409
HSPB7	0.0408644	0.337168	0.654535
RXRA	0.0409146	0.337377	-0.31383
CARTPT	0.0410352	0.338165	0.562501
ACADVL	0.0412226	0.338619	0.321942
PSMB1	0.041196	0.338619	-0.270799
NR1I3	0.0412407	0.338619	0.29949
TNFSF14	0.0411912	0.338619	-0.61773
UIMC1	0.0411447	0.338619	0.533936
EDDM3B	0.0411328	0.338619	0.222958
SATB1	0.0413042	0.338935	-0.478191
BIK	0.0414312	0.339565	-0.55193
LSM12	0.0414272	0.339565	-0.343401
SLC15A1	0.0415635	0.339712	0.269102
SLC1A7	0.0415375	0.339712	0.24064
SULF1	0.041554	0.339712	0.249892
ELTD1	0.0415748	0.339712	0.296407
C22orf46	0.041533	0.339712	0.398499
GCC1	0.041624	0.339909	-0.268398
RUNX2	0.0416704	0.340082	0.345636
RABEPK	0.0417131	0.340175	-0.300071
TFF1	0.0417573	0.340175	0.507476
ARHGAP24	0.0417488	0.340175	0.456624
ATN1	0.0418007	0.340324	0.225649
LST1	0.0418794	0.340705	-0.388888
LIMCH1	0.0418981	0.340705	0.17007
HIST1H2AD /// HIST1H3A /// HIST1H3B /// HIST1H3C /// HIST1H3D /// HIST1H3E /// HIST1H3F /// HIST1H3G /// HIST1H3H /// HIST1H3I /// HIST1H3J	0.0419744	0.340894	-0.468308
TMEM242	0.0419773	0.340894	0.467713
DNAJB14	0.0420222	0.340894	-0.648194
EXO5	0.0420053	0.340894	0.328748
LARGE	0.0422953	0.342083	0.290275
HOXC11	0.0422951	0.342083	0.52966
WDR11	0.0422593	0.342083	-0.379116
LRRC19	0.0422398	0.342083	0.360922
DPP8	0.0422391	0.342083	-0.377293
AGTR1	0.0423298	0.342157	0.36736
REEP1	0.0423572	0.342174	0.364238
PPM1F	0.0423879	0.342217	-0.272471
CASP10	0.0424929	0.34286	0.269227
SLC8A2	0.042562	0.343213	0.209758
CRABP2	0.0426989	0.344009	0.44289
ZNF35	0.0427533	0.344009	-0.559436
CDSN	0.0427571	0.344009	0.146645
ANK3	0.0427625	0.344009	0.248019
KLF3-AS1	0.0427879	0.344009	-0.221488
GDE1	0.0429214	0.344459	-0.370121
BPI /// LOC149684	0.0428959	0.344459	1.01315
HTR2B	0.0428762	0.344459	0.400493
PDE6G	0.0429797	0.344459	0.340676
TRANK1	0.0429759	0.344459	-0.433731
KLF2	0.0429969	0.344459	0.422428
GSK3A	0.0431315	0.344785	0.72697
HUWE1	0.0431384	0.344785	0.225354
MSR1	0.0431396	0.344785	0.228458
UTP14A	0.0430874	0.344785	0.240161
TUT1	0.0431712	0.344834	0.399766
PSMA3	0.0432488	0.345123	-0.769337
YIPF3	0.0432584	0.345123	-0.409253
SOX9	0.0432959	0.345218	0.312093
RHAG	0.043367	0.345377	0.3042
MFSD10	0.0433601	0.345377	-0.760391
CLOCK	0.0434542	0.345535	0.342066
SLC1A1	0.0434332	0.345535	0.245583
CNTD2	0.0434636	0.345535	0.577153
UNC50	0.0436334	0.345841	-0.609296
CETP	0.0435892	0.345841	0.532508
SLC1A2	0.0435588	0.345841	-0.316488
PRKCQ	0.0436555	0.345841	0.381874
GNRHR	0.0435422	0.345841	0.191804
CA8	0.0436483	0.345841	0.432594
NARS	0.0437933	0.346729	-0.329526
HOXC13	0.0438203	0.34674	0.793742
ST6GALNAC5	0.0438998	0.347165	0.324101
TLR1	0.0439642	0.347346	-0.461627
CYP46A1	0.0439741	0.347346	0.469052
NPM1	0.0441342	0.347675	0.292472
STAT1	0.0441383	0.347675	-0.37764
SPAG1	0.0441443	0.347675	0.261932
FTSJ2	0.0440789	0.347675	-0.415979
MTMR12	0.0441116	0.347675	0.425877
ADRM1	0.0441982	0.347789	-0.569685
VPS37C	0.0442103	0.347789	-0.455292
ZNHIT1	0.0442599	0.347848	-0.680543
TRIL	0.044276	0.347848	0.274412
KRT1	0.044295	0.347848	-1.33703
SIRT6	0.0444228	0.348649	0.384251
LOC157562	0.0444655	0.348782	-0.448563
ST14	0.0447237	0.349445	-0.211146
GTF2F1	0.044731	0.349445	-0.232728
ZC3H14	0.0447048	0.349445	-0.347024
STAU2	0.044598	0.349445	0.340946
ACD	0.044634	0.349445	-0.529343
SEMA4F	0.0446474	0.349445	0.251939
CTSZ	0.0446713	0.349445	-0.387788
SMNDC1	0.0448078	0.349641	-0.380841
PLEKHB2	0.0448002	0.349641	-0.379807
FAM20B	0.0449201	0.349732	-0.213183
ROS1	0.0449221	0.349732	0.321391
TMEM50B	0.044923	0.349732	-0.240472
SMCO4	0.0449144	0.349732	-0.292585
BLVRA	0.0450119	0.349819	-0.266091
DNAJB6 /// TMEM135	0.0449643	0.349819	-0.374663
TIMM22	0.0450053	0.349819	-0.581499
PPP2R2A	0.0450908	0.350076	-0.2967
GMFB	0.04513	0.350076	0.265547
GUCY1B3	0.0452004	0.350076	0.36139
MYB	0.0451951	0.350076	0.239963
MCOLN1	0.0451927	0.350076	-0.804856
C1orf174	0.0451224	0.350076	-0.269271
KDM6A	0.0453549	0.35013	-0.300116
PYGM	0.0453627	0.35013	-0.453225
ART3	0.0452945	0.35013	0.42457
AR	0.0453272	0.35013	0.272939
TRAPPC10	0.0453126	0.35013	-0.320944
RANBP10	0.045322	0.35013	-0.375316
LOC339166 /// WSCD1	0.0454252	0.350212	0.413574
RAP2C	0.0454054	0.350212	-0.494217
RNF40	0.0455101	0.35036	-0.180911
AEN	0.0454902	0.35036	-0.324884
RBFOX1	0.0455222	0.35036	0.514027
PAFAH1B2	0.045568	0.350512	0.428715
RFX7	0.0456457	0.350512	-0.304644
SH3BGRL3	0.0456399	0.350512	0.523205
CALHM2	0.0456376	0.350512	-0.549475
KDELR2	0.0461886	0.351206	-0.207159
EIF4G3	0.0458749	0.351206	0.403434
PCM1	0.0461935	0.351206	-0.290216
GTF2H1	0.046173	0.351206	-0.314283
STIM1	0.0461977	0.351206	0.344271
SCAF8	0.0460115	0.351206	-0.375842
CDC40	0.0459154	0.351206	-0.229494
NEBL	0.0460869	0.351206	0.291211
PREP	0.0461299	0.351206	-0.411806
PSG9	0.0462744	0.351206	0.266864
PLAUR	0.0457832	0.351206	-0.303149
PTCRA	0.046266	0.351206	-0.27179
FAM89B	0.0462716	0.351206	-0.473126
ARHGEF18	0.0458403	0.351206	-0.27806
TTC9	0.0459412	0.351206	-0.279232
FAM224A	0.0462817	0.351206	0.270658
VRK3	0.0459933	0.351206	0.338402
CHODL	0.046167	0.351206	0.274582
VGLL3	0.0458897	0.351206	0.264376
KCNE2	0.0460431	0.351206	0.224413
PRND	0.0460603	0.351206	0.32094
NACA	0.0464848	0.351383	-0.296073
EAPP	0.0464965	0.351383	-0.539854
CABIN1	0.0465131	0.351383	-0.422269
PEG10	0.0464915	0.351383	0.23164
TSPYL5	0.0463505	0.351383	0.305981
CPS1-IT1	0.0464882	0.351383	0.261024
TCEB3B	0.0464479	0.351383	0.390669
ASCL3	0.046395	0.351383	0.609635
GMCL1	0.0465674	0.351597	0.255724
EPHB3	0.0467456	0.352155	0.500425
SURF2	0.0466686	0.352155	-0.411009
RFPL1S	0.0467396	0.352155	0.347813
COMMD9	0.046711	0.352155	-0.497178
ZBED2	0.0468322	0.352611	0.270301
THOC7	0.0469792	0.353521	-0.467327
GPD2	0.0470741	0.354038	0.256476
GOLGA8N	0.0471722	0.354579	0.622249
C15orf39	0.0472813	0.355034	-0.261672
THRB	0.0472853	0.355034	0.452199
DDX19A /// DDX19B	0.0474674	0.355808	-0.417694
USP11	0.0474435	0.355808	-0.314284
TPSAB1 /// TPSB2	0.0474242	0.355808	0.333619
PABPC1P1 /// PABPC1P1	0.0475476	0.356212	-0.290284
SAV1	0.0476014	0.356417	0.311302
FOXRED2	0.0476407	0.356514	0.245469
CDC45	0.0476781	0.356596	-0.282982
OSGIN2	0.0478761	0.357742	0.231903
C18orf8	0.0478843	0.357742	-0.313742
PRH1 /// PRH1-PRR4 /// PRH2	0.0479277	0.357869	0.166779
CIZ1	0.0480931	0.357985	-0.397083
ECE2	0.0481021	0.357985	0.526546
RAB1A	0.0480236	0.357985	-0.361108
NCR3	0.0480643	0.357985	-0.368548
ENTPD1-AS1	0.0480995	0.357985	0.51554
POLL	0.0480591	0.357985	-0.212723
FGF1	0.0481951	0.358282	0.343172
ESF1	0.048179	0.358282	-0.28092
RAP1A	0.0484503	0.358291	-0.528654
LRRC17	0.04825	0.358291	0.494958
MINK1	0.0483802	0.358291	0.42787
COQ7	0.048355	0.358291	0.268522
PCDHGA3	0.0483959	0.358291	0.363629
MED4	0.0484305	0.358291	-0.454459
HSD17B12	0.0483259	0.358291	-0.357535
ENOX1	0.0483973	0.358291	0.376625
LIM2	0.0482693	0.358291	0.555414
DHRS7B	0.0484733	0.358291	-0.533222
PCIF1	0.0484879	0.358291	-0.21259
ULK4	0.0485669	0.358678	0.343806
LOC101928189 /// RSRP1	0.0486798	0.35912	0.321446
CLUHP3	0.0486742	0.35912	-0.522312
GTF2A1	0.0487604	0.359267	0.370003
FAM212B /// LOC101928718	0.0487406	0.359267	0.583508
ALG11 /// UTP14A /// UTP14C	0.0487795	0.359267	0.34897
PCP4	0.0488389	0.359294	0.519726
KRT34 /// LOC100653049	0.0488629	0.359294	0.189425
TEX264	0.0488137	0.359294	-0.400889
PAX8	0.0491014	0.359909	0.196638
MORC2	0.0491014	0.359909	-0.219722
ADRA2B	0.0491064	0.359909	0.360386
CDC37	0.0490206	0.359909	-0.705363
TSPAN2	0.0490778	0.359909	0.197125
YKT6	0.0490732	0.359909	-0.27511
TP53I11	0.0493154	0.36054	-0.208414
STX4	0.0492422	0.36054	-0.322972
HIST1H4E	0.0492686	0.36054	0.260789
MIA3	0.0493258	0.36054	-0.274423
C9orf53	0.04931	0.36054	0.178305
CPSF7	0.0493746	0.360701	0.199523
ENSA	0.0494864	0.360963	-0.223605
APOE	0.0494605	0.360963	0.21635
IL11RA	0.0495439	0.360963	-0.412861
POLG2	0.0495358	0.360963	-0.497543
MTSS1L	0.0495044	0.360963	0.214488
C9orf9	0.0495888	0.361095	0.361996
CDIPT	0.0496844	0.361116	0.596967
STK24	0.0496985	0.361116	-0.273279
TIMM13	0.0496667	0.361116	-0.349852
ZWILCH	0.0496465	0.361116	0.472593
RPS2 /// SNORA64	0.0498055	0.361251	-0.419295
RPL39	0.0498241	0.361251	0.284693
RPL36	0.0497598	0.361251	0.458348
MCTP2	0.0498111	0.361251	0.3916
MCRS1	0.0499688	0.361525	-0.315488
RAD9A	0.0499599	0.361525	-0.48682
EED	0.0499138	0.361525	-0.231043
DOK3	0.0499235	0.361525	-0.339512
ZMIZ1	0.0499993	0.361552	-0.314021
MORF4L2	0.0500323	0.361597	-0.32847
ARF3	0.0500723	0.361693	-0.308891
DCTN1	0.0501621	0.362148	-0.36326
PARN	0.0502294	0.362349	0.38016
YARS	0.0502703	0.362349	-0.335468
SLC38A4	0.0502522	0.362349	0.21621
MOB1A	0.0503649	0.362499	0.249965
TRIP11	0.0503528	0.362499	0.499918
CTC1	0.0503716	0.362499	-0.394352
LOC101929910 /// LOC613037 /// NPIPA5 /// NPIPB11 /// NPIPB3 /// NPIPB4 /// NPIPB5 /// NPIPB8	0.0504445	0.362637	0.248687
ZC3H7A	0.0504256	0.362637	-0.348317
RRP7A	0.0504997	0.362841	-0.441006
PLD3	0.0505706	0.363157	-0.439862
LY6H	0.0506388	0.363454	0.213154
ZNF212	0.0506734	0.363484	-0.539964
TERT	0.0506968	0.363484	-0.281451
CCL16	0.0507424	0.363618	-0.432835
HNF1B	0.0507823	0.363711	0.572188
TPST2	0.0508816	0.364157	0.25108
CHD8	0.0508985	0.364157	-0.444774
CCR7	0.0510564	0.364576	0.451041
KLRD1	0.050996	0.364576	-0.470591
N4BP2L2 /// U50535	0.0511116	0.364576	-0.592535
ANGEL2	0.0511189	0.364576	-0.263198
SUSD4	0.0510653	0.364576	0.579977
ZNF692	0.0510879	0.364576	0.291945
SLC25A36	0.0511955	0.364738	-0.31311
DERL2	0.0511845	0.364738	-0.828849
TNIP1	0.0512451	0.364898	-0.355223
NT5DC3	0.0512959	0.365068	-0.487005
VAPB	0.0514432	0.365571	-0.18312
SLC12A2	0.0514747	0.365571	0.44773
PIR	0.0514588	0.365571	-0.257833
CNOT6	0.0514666	0.365571	-0.257246
ZNF702P	0.0515804	0.365936	0.315101
GABRA2	0.0515569	0.365936	0.418974
MYOF	0.0517145	0.365943	-0.329483
FXR2	0.051686	0.365943	0.255944
CELA3B	0.0517168	0.365943	-0.46915
HADHA	0.0517035	0.365943	-0.360978
BPIFA1	0.0516201	0.365943	0.82641
IL2RB	0.0519195	0.36661	0.452535
ZNF91	0.0519161	0.36661	-0.394184
PSMB8	0.0518382	0.36661	-0.677725
ZNF710	0.0518805	0.36661	-0.311435
ALB	0.0519726	0.366794	0.221663
PDE9A	0.0520411	0.366894	-0.171616
CD300C	0.0520338	0.366894	-0.520989
CFD	0.0521061	0.36716	-0.964194
POLR2F	0.0521333	0.367161	-0.523108
CYB5R3	0.0522109	0.367168	0.443569
LSS	0.0522158	0.367168	-0.224843
TIPIN	0.0522105	0.367168	-0.370075
OPTN	0.0523375	0.36733	-0.392768
ULK2	0.0522819	0.36733	0.313934
OLFML3	0.0523457	0.36733	0.409794
C1orf106	0.0523475	0.36733	0.497864
CD34	0.0523836	0.367392	0.345512
UPF3B	0.052416	0.367429	-0.48116
SCRN1	0.0525152	0.367552	-0.364911
EIF4G1	0.0524814	0.367552	-0.298751
MAPK13	0.0525104	0.367552	0.254418
ZNF586	0.052602	0.367969	-0.211699
PDE2A	0.0527659	0.36815	-0.517299
PLLP	0.0527776	0.36815	0.445183
DDX18	0.0527511	0.36815	-0.256108
CLCN2	0.0527703	0.36815	0.461105
PTPRA	0.0527232	0.36815	-0.236464
ZNF706	0.0528218	0.36815	-0.382516
ATP6V0A4	0.0528458	0.36815	0.594922
GDPD2	0.0527948	0.36815	0.497622
BST2	0.0530479	0.368593	-0.441849
LPCAT3	0.053161	0.368593	-0.337553
EMP3	0.0529519	0.368593	-0.611364
CHRNA5	0.0531575	0.368593	0.522189
KCNQ3	0.0530708	0.368593	0.498163
BRS3	0.0531821	0.368593	0.51723
EID1	0.0531344	0.368593	-0.299862
TTTY9A /// TTTY9B	0.052974	0.368593	0.590196
FGD6	0.0530835	0.368593	-0.236357
SLC22A11	0.053051	0.368593	0.341899
RNASEH2A	0.0532634	0.36871	0.360871
PPARG	0.0532388	0.36871	0.262504
HAO1	0.0532808	0.36871	0.39792
PDE4B	0.0533532	0.36902	-0.243332
TSPAN6	0.0533802	0.36902	0.247048
UAP1	0.0534125	0.369054	-0.401575
RELA	0.0535791	0.369333	-0.23603
GBAS	0.0536681	0.369333	-0.386296
SENP3	0.0535601	0.369333	-0.268421
AMT	0.0535364	0.369333	0.4546
TEK	0.053633	0.369333	0.550211
ADH6	0.0535935	0.369333	0.225607
TMEM165	0.0536899	0.369333	0.562916
PARP6	0.0536987	0.369333	0.201401
ARHGEF38	0.0535555	0.369333	0.728881
LILRA1	0.0537979	0.369826	-0.368303
GFPT1	0.0539097	0.370311	-0.398175
HGF	0.0539233	0.370311	0.236238
ZW10	0.0540238	0.370801	0.574486
STAC	0.0540494	0.370801	0.543999
FCGR2B	0.0540793	0.370818	-0.389411
SEPHS2	0.0544327	0.37096	-0.341088
LOC101930112 /// SPG7	0.0543957	0.37096	-0.448124
KAT2B	0.0545974	0.37096	-0.5437
PIM2	0.0545787	0.37096	0.555604
FLRT2 /// LOC100506718	0.0547331	0.37096	0.241075
SNCA	0.0544194	0.37096	-0.800785
PCSK2	0.0541986	0.37096	0.360205
GSTM5	0.0544232	0.37096	0.429824
F2	0.0546402	0.37096	0.253324
GLRX	0.0544577	0.37096	0.318102
CCR2	0.05473	0.37096	-0.308508
CELP	0.0547209	0.37096	-0.484312
OSBPL2	0.0547631	0.37096	-0.279027
DDIT3	0.0543192	0.37096	0.556195
NR2F1	0.0547862	0.37096	0.273045
BC069004	0.0541772	0.37096	0.362922
ATP9B	0.0545919	0.37096	-0.193957
SBSPON	0.0546934	0.37096	0.224216
CPN2	0.0547847	0.37096	0.469868
TULP4	0.0545412	0.37096	0.23418
STAG3L4	0.0542647	0.37096	0.373578
SIGLEC1	0.054335	0.37096	-0.374841
GIPC2	0.0545599	0.37096	0.322042
PODNL1	0.0547437	0.37096	-0.447315
AF090939	0.0547743	0.37096	-0.355107
HMGB3P1	0.0548556	0.371244	-0.474705
ATP7A	0.0548964	0.371283	0.281556
PLCL1	0.0551897	0.371283	0.25754
[truncated: 11,516 more rows]

## Sheet: UM-SA
Gene	Pvalue	FDR	logFC
DDR1 /// MIR4640	0.127856	0.872802	0.236351
RFC2	0.0510293	0.764425	-0.35027
HSPA6	0.0219775	0.673456	-0.505845
PAX8	0.315021	0.936549	0.096605
GUCA1A	0.921394	0.999587	0.0152913
MIR5193 /// UBA7	0.143934	0.885264	-0.341299
THRA	0.724294	0.983171	0.0418531
PTPN21	0.697067	0.981306	0.037948
CCL5	0.00447087	0.537838	0.770849
CYP2E1	0.610795	0.979366	-0.0565809
EPHB3	0.690473	0.981306	0.0952253
ESRRA	0.350852	0.945609	0.113004
CYP2A6	0.943735	0.999587	0.00871495
GAS6	0.28611	0.932747	-0.134174
MMP14	0.831905	0.995392	-0.0240666
TRADD	0.718636	0.982803	0.064335
CHURC1-FNTB /// FNTB	0.692431	0.981306	-0.0801152
PLD1	0.378267	0.949507	0.0853347
DTX2P1-UPK3BP1-PMS2P11	0.71364	0.981799	0.0483879
BAD	0.949222	0.999587	-0.0149712
PRPF8	0.554605	0.974428	0.194902
CAPNS1	0.78358	0.991073	0.0517604
RPL35	0.166294	0.897907	-0.370771
MIR6805 /// RPL28	0.0610099	0.769696	-0.261813
EIF4G2	0.510346	0.968642	0.0626057
EIF3D	0.566611	0.976138	-0.100733
PARK7	0.596265	0.977235	0.0903115
SRP14	0.332648	0.942203	-0.213259
GDI2	0.0160198	0.639735	-0.341784
RPL11	0.737074	0.984164	-0.0974387
ARF3	0.726078	0.983171	-0.0525432
RPL21 /// RPL21P28 /// SNORA27 /// SNORD102	0.519296	0.968642	0.081668
RPL24	0.551671	0.974428	-0.115216
HNRNPC	0.13148	0.877119	-0.235745
SEPT2	0.294171	0.934249	0.129933
HNRNPA1 /// HNRNPA1P10	0.053485	0.765903	0.31535
RPS27A	0.378615	0.949507	0.186004
LOC100508408 /// RPS13 /// SNORD14B	0.169122	0.901258	0.216799
FAU	0.146194	0.885264	-0.394815
TARDBP	0.855931	0.996292	-0.0232095
CFL1	0.839587	0.995942	-0.0222513
RPL18	0.0172964	0.641119	-0.313743
EIF3F	0.876096	0.997935	-0.0171199
RPS5	0.670144	0.981306	-0.0667793
RPL27	0.343736	0.945572	0.183612
RPL34	0.974016	0.999587	0.0153962
NARS	0.259705	0.932178	0.177398
STARD7	0.42589	0.956386	0.216445
RPL19	0.954583	0.999587	-0.00846825
SLC25A3	0.900925	0.999587	-0.0155501
RPS11 /// SNORD35B	0.678471	0.981306	-0.0615162
RPL9	0.916925	0.999587	-0.0286827
DDX5 /// MIR3064 /// MIR5047	0.659963	0.981221	-0.0776234
RPL6	0.511778	0.968642	-0.0976984
CTDNEP1	0.549552	0.974428	0.105426
RPL10A	0.798786	0.991998	-0.0505043
CBX3	0.573213	0.977235	-0.111476
C18orf32 /// RPL17 /// RPL17-C18orf32 /// SNORD58A /// SNORD58B /// SNORD58C	0.951696	0.999587	-0.0225842
PSMB2	0.721725	0.983171	-0.0987603
KHDRBS1	0.258841	0.931869	0.105262
ATP6V1G2-DDX39B /// DDX39B /// SNORD84	0.65711	0.981221	-0.0839933
RTCB	0.212296	0.911149	-0.190116
ERH	0.687857	0.981306	-0.125515
GATC /// SRSF9	0.430002	0.956386	-0.142132
ABCF1	0.785189	0.991073	0.0302783
DAD1	0.897253	0.999587	0.0230305
YY1	0.0669871	0.795139	0.19508
JTB	0.846836	0.995989	0.0264804
KAT7	0.903186	0.999587	0.0315593
ZNF146	0.237759	0.922037	-0.200962
SART1	0.327002	0.940003	-0.142231
ILF2	0.994865	0.999587	-0.00122855
SPAG7	0.48393	0.966617	-0.103774
ZPR1	0.719028	0.982803	-0.0420513
TAF10	0.603928	0.97786	-0.0817197
C1D	0.159276	0.894627	0.31404
NONO	0.754166	0.986742	-0.0597943
LOC101929240 /// SNRNP200	0.91565	0.999587	0.0148854
RHOA	0.850131	0.995989	0.023179
RNPS1	0.729144	0.983261	-0.0680826
RPS24	0.736224	0.983683	-0.11544
RPL30	0.289504	0.932747	-0.132977
NPM1	0.758659	0.987015	-0.0423315
HSP90AB1	0.594788	0.977235	-0.147491
ARF1 /// MIR3620	0.206912	0.907747	-0.2428
IK	0.994018	0.999587	0.00173704
SNX3	0.34861	0.945609	0.233321
CANX	0.412882	0.953818	-0.116341
SART3	0.792942	0.991684	0.046173
CNPPD1	0.134389	0.879445	0.466162
SMNDC1	0.548165	0.974428	0.108497
HNRNPM	0.359912	0.948932	-0.158571
HNRNPD	0.536387	0.973298	0.0745367
RPL14	0.154885	0.89313	0.204144
GUK1	0.963805	0.999587	0.00803397
KXD1	0.744955	0.985042	-0.0359045
OAZ1	0.903059	0.999587	0.0191337
ATP6V0B	0.0912212	0.829406	-0.280382
KARS	0.31166	0.936019	-0.118299
H3F3A /// H3F3AP4 /// H3F3B	0.0930442	0.830329	-0.157199
RPS6	0.620937	0.979693	-0.0696193
RPS7	0.933234	0.999587	0.0266578
USP22	0.609104	0.979189	0.0507415
C11orf58	0.892439	0.999587	0.0297467
TCEB2	0.567988	0.976138	0.0725982
COX4I1	0.540981	0.973532	0.0723431
TMED2	0.123563	0.872802	-0.310402
NBEAL1 /// RPL12	0.285318	0.932747	-0.133235
RPL4 /// SNORD16 /// SNORD18A /// SNORD18B /// SNORD18C	0.880164	0.998744	-0.0304706
FNTA	0.232454	0.918547	-0.163643
RPS25	0.721965	0.983171	0.0764203
RPL37	0.905193	0.999587	-0.0153983
HINT1	0.804708	0.992846	0.0670533
EEF2	0.162842	0.896058	0.277385
RPS10	0.893244	0.999587	0.0192801
ATP6V0E1	0.735857	0.983683	-0.040913
HNRNPK	0.91141	0.999587	0.0160667
ANAPC5	0.592071	0.977235	-0.0612922
RPS3A /// SNORD73A	0.522898	0.969406	-0.138138
HNRNPU	0.973233	0.999587	0.00491692
EIF3A	0.918111	0.999587	-0.0170789
HSP90B1 /// MIR3652	0.775966	0.990529	-0.0732975
MSN	0.947057	0.999587	0.0135784
ACTN4	0.532548	0.973099	0.174822
APP	0.619662	0.979693	0.0563381
PRKAR1A	0.429121	0.956386	-0.110156
DSP	0.993822	0.999587	-0.00108327
RAD21	0.135671	0.88059	0.220138
WDR1	0.131806	0.877119	-0.213899
NCL	0.928649	0.999587	0.0204206
AP2B1	0.0120046	0.586649	0.518474
AP2M1	0.138078	0.88059	0.338506
CLTC	0.00631054	0.554957	0.426359
MLEC	0.801579	0.992421	0.0448335
LASP1	0.767891	0.988164	-0.0540047
SF3B2	0.796116	0.991998	0.112804
TMEM59	0.895215	0.999587	-0.0365897
CSRP1	0.794422	0.991797	-0.0394347
CALM1 /// CALM2 /// CALM3	0.920457	0.999587	0.00900308
MATR3 /// SNHG4	0.787028	0.991142	-0.0517212
CAP1	0.863227	0.997846	0.0226399
PTGES3	0.795366	0.991823	0.0402987
WARS	0.121237	0.870681	-0.36241
SET /// SETSIP	0.765434	0.988143	-0.0458731
NDRG1	0.737223	0.984228	0.0617231
UBB	0.749035	0.986155	-0.049243
PFN1	0.845442	0.995989	0.0605392
PTPRF	0.591856	0.977235	-0.0544913
YWHAZ	0.586665	0.977235	-0.0645138
SOD1	0.0155538	0.631259	0.424881
HDLBP	0.377405	0.949507	0.151361
MARCKSL1	0.771484	0.988744	-0.0726176
GABARAP	0.78632	0.991118	-0.0544556
NUCB1	0.272779	0.932747	-0.26439
EIF3C /// EIF3CL	0.444893	0.958728	-0.131921
GLUL	0.22434	0.915506	0.213383
LDHA	0.278804	0.932747	0.187071
GNB2L1 /// SNORD95 /// SNORD96A	0.92853	0.999587	0.0153137
SSR2	0.674054	0.981306	-0.0666058
P4HB	0.387066	0.949679	-0.220412
SLC25A5	0.817676	0.993991	0.0330304
PHB	0.0416056	0.729312	-0.323888
S100A11	0.610492	0.979366	-0.228836
CTSA	0.334987	0.942316	-0.365694
TOMM20	0.687771	0.981306	0.0547379
CD63	0.534477	0.973099	-0.156475
DNAJB1	0.781675	0.991073	0.066211
SPARC	0.0342835	0.698222	0.415235
UBE2D3	0.781792	0.991073	0.0434458
XBP1	0.244491	0.925457	-0.211144
SPTBN1	0.87052	0.997856	-0.0165302
LAPTM4A	0.279957	0.932747	-0.192873
RPL32	0.989182	0.999587	-0.00128771
CD81	0.453869	0.960395	-0.141364
UBE2L3	0.978103	0.999587	-0.00446318
PTTG1IP	0.150619	0.892422	-0.23092
GRN	0.575881	0.977235	-0.14293
HMGB1	0.512847	0.968642	0.137488
GLO1	0.919427	0.999587	-0.0318156
SRSF11	0.0606659	0.769696	0.252186
SF3B3	0.104761	0.847307	0.255041
EEF1G /// MIR3654	0.645248	0.981221	0.0578425
HSPA9	0.377645	0.949507	-0.165635
YWHAQ	0.581815	0.977235	0.0881051
DDX24	0.260134	0.93255	0.166693
PPP2R1A	0.112793	0.85988	-0.346772
GSN	0.53363	0.973099	0.0902118
HK1	0.0766536	0.812227	0.650603
KDELR2	0.0714592	0.800209	-0.185459
NPC2	0.00713647	0.564438	-0.420128
DYNLL1	0.0117622	0.586649	0.563664
LITAF	0.228769	0.915741	-0.224714
EEF1B2 /// SNORA41	0.827323	0.994681	-0.0455917
PRKCSH	0.553082	0.974428	0.141014
GOT2	0.656724	0.981221	-0.0713712
FKBP1A /// LOC101929368	0.658352	0.981221	-0.0609305
ACADVL	0.436646	0.957962	-0.116932
SKP1	0.0605946	0.769696	0.255386
MAPRE1	0.689653	0.981306	-0.0602435
OS9	0.515954	0.968642	-0.0970979
RPL13A /// SNORD32A /// SNORD33 /// SNORD34 /// SNORD35A	0.156216	0.89313	0.279265
RPL13A /// RPL13AP5 /// SNORD32A /// SNORD33 /// SNORD34 /// SNORD35A	0.964084	0.999587	-0.00643728
RPL7	0.597753	0.977235	0.135728
ACTR1A	0.948696	0.999587	-0.00831364
CAPRIN1	0.528129	0.971389	-0.122533
RPL10 /// SNORA70	0.270208	0.932747	-0.116237
PPP1CC	0.168596	0.900823	0.316931
ACTR2	0.442417	0.958522	0.154775
PTP4A1	0.144135	0.885264	-0.190674
NACA	0.451073	0.960336	-0.107062
GPX1	0.657925	0.981221	0.172662
PGK1	0.176526	0.901258	-0.240524
SUMO3	0.271824	0.932747	0.0984806
RPS27	0.424708	0.955857	0.189218
TPP1	0.950567	0.999587	-0.00813347
GNB1	0.888048	0.999587	0.0249425
NUMA1	0.78522	0.991073	0.0375234
FTH1	0.275446	0.932747	0.174293
RAN	0.521112	0.968845	-0.130805
CAPN1	0.81342	0.993991	-0.0574105
MIR636 /// SRSF2	0.510644	0.968642	-0.122907
CALU	0.335898	0.942316	-0.128263
NFE2L1	0.0684566	0.800209	-0.376056
ARL6IP5	0.979352	0.999587	0.00390247
DPYSL2	0.58066	0.977235	0.11379
RPLP1	0.196406	0.904028	0.146418
CTNNA1	0.793028	0.991684	0.0312788
CTSD	0.386229	0.949507	-0.267326
FAM120A	0.298902	0.934494	0.100567
MAT2A	0.193864	0.90203	-0.199741
LAMC1	0.250732	0.927724	0.156763
LOC100506248 /// LOC728026 /// MIR1244-1 /// MIR1244-2 /// MIR1244-3 /// PTMA	0.0786019	0.813403	-0.676176
PTMA	0.318752	0.93758	-0.164712
BZW1	0.0998079	0.842637	-0.260002
ATF4	0.103351	0.845892	-0.27676
GNAS	0.0284305	0.696485	0.327562
RPS15A	0.596649	0.977235	0.10012
ANXA5	0.74778	0.985535	-0.0704521
STMN1	0.785599	0.991073	-0.0396396
LRP1	0.389679	0.95065	-0.134155
PSMB7	0.636683	0.981048	0.0681464
PEA15	0.0498188	0.762781	-0.319772
ECH1	0.813685	0.993991	-0.0340032
ODC1	0.0969273	0.836478	0.329535
IQGAP1	0.312248	0.936549	0.266407
XRCC6	0.460882	0.961946	-0.0924697
ACO2	0.407026	0.953818	0.145818
DAZAP2	0.108207	0.858726	-0.246354
SPARCL1	0.103013	0.845892	-0.271508
MCL1	0.029458	0.696485	-0.344182
HSPA1A /// HSPA1B	0.641919	0.981221	0.142969
HSPA1A /// HSPA1B /// HSPA1L	0.693257	0.981306	-0.217295
ACTB	0.605925	0.97786	-0.0881602
SARS	0.853818	0.995989	0.0252489
TMBIM6	0.577171	0.977235	-0.0596475
LMAN2	0.171687	0.901258	-0.214029
HSPD1	0.257824	0.931683	-0.259011
ZYX	0.870842	0.997856	-0.0454544
RPL12	0.158444	0.894101	-0.181817
CIRBP	0.40892	0.953818	-0.136076
CCT7	0.544343	0.974428	-0.221933
PAFAH1B1	0.502553	0.968642	-0.0652589
PSME1	0.0996962	0.842637	-0.335863
ATP5O	0.0983815	0.840798	-0.253492
RPS15	0.60606	0.97786	-0.0768871
PSMD8	0.118498	0.866812	-0.468192
LAMP2	0.710749	0.981799	-0.0535809
TPI1	0.458714	0.961946	0.102825
RPL29	0.650066	0.981221	-0.0998393
GSTP1	0.810973	0.993722	-0.0542785
HYOU1	0.507444	0.968642	-0.148461
SNRPD2	0.494009	0.966823	-0.166859
PLOD1	0.542751	0.973737	0.0716656
ZNF207	0.370709	0.949507	0.108464
PSMD2	0.021197	0.673456	0.525677
SCD	0.638547	0.981221	0.0477592
RAP1B	0.787022	0.991142	0.0315788
RPS21	0.692466	0.981306	0.112259
MAP4	0.622874	0.979973	0.0463494
BCAP31	0.354735	0.945609	-0.213996
CTSB	0.608605	0.978852	0.096754
EPRS	0.178743	0.901258	0.170692
PRDX6	0.77928	0.990964	-0.0455674
PPP1CA	0.0603448	0.769696	-0.518385
SARAF	0.337125	0.942316	-0.158944
AHCYL1	0.256915	0.931387	0.112015
IST1	0.472147	0.963097	-0.118202
GNB2	0.898194	0.999587	-0.0293945
H2AFZ	0.570218	0.977235	-0.11218
NCOR1	0.201328	0.90739	0.120997
RPS8 /// SNORD38B /// SNORD55	0.473702	0.963097	0.152139
FLNA	0.890661	0.999587	0.0319125
CNOT1	0.552473	0.974428	0.0707141
DHCR24	0.812146	0.993779	0.0462653
RAB11A	0.460868	0.961946	0.0982873
PSAP	0.221519	0.915506	-0.297855
RNF114	0.321641	0.93912	-0.159804
RPL18A /// SNORA68	0.735142	0.983683	-0.0733159
STRAP	0.401733	0.952612	0.133578
S100A10	0.340895	0.942483	-0.190843
CCT8	0.168144	0.900823	-0.145642
MIR1292 /// NOP56 /// SNORD110 /// SNORD57 /// SNORD86	0.696104	0.981306	0.0519234
PSMB1	0.65286	0.981221	-0.0565625
CCT4	0.943663	0.999587	0.0157962
EPAS1	0.980203	0.999587	0.00403576
DNAJA1	0.442613	0.958522	-0.152579
PSMD4	0.118801	0.868283	-0.230333
UQCRC2	0.943285	0.999587	0.0108859
CKB	0.191067	0.901258	-0.225817
RHOC	0.336679	0.942316	-0.15906
PGAM1	0.0514269	0.764425	0.309113
STAT1	0.0522283	0.764425	-0.362816
RPL23 /// SNORA21	0.557704	0.974428	-0.146856
SSR1	0.409632	0.953818	0.108476
TRA2B	0.650276	0.981221	-0.0607596
FKBP4	0.569224	0.976799	-0.0929593
HDGF	0.228183	0.915741	0.350832
PALLD	0.518	0.968642	0.0802348
MGEA5	0.473245	0.963097	-0.119893
M6PR	0.434075	0.957962	-0.302061
M6PR /// PHC1	0.00392649	0.537838	-0.494416
SEP15	0.606123	0.97786	-0.101703
AHCY	0.210308	0.911149	-0.144383
HLA-E	0.204444	0.907679	-0.240255
RPLP2	0.151204	0.892749	0.264096
RPLP2 /// SNORA52	0.124664	0.872802	-0.371252
CCT3 /// LOC101927137	0.704835	0.981799	-0.0896248
TACC1	0.659338	0.981221	-0.0495218
EIF4A2 /// MIR1248 /// SNORA4 /// SNORA63 /// SNORA81 /// SNORD2	0.932441	0.999587	-0.0155898
PPM1G	0.448538	0.959024	-0.200865
KTN1	0.190845	0.901258	0.253003
TAGLN2	0.56525	0.975902	-0.150371
SRPR	0.673309	0.981306	0.0902299
PHC2	0.242112	0.922769	-0.172896
BTG1	0.614892	0.979693	0.0796191
KDELR1	0.4434	0.958728	0.172282
LGALS3BP	0.0269869	0.696485	-0.610529
SLC3A2	0.27486	0.932747	-0.309357
COX6A1	0.115973	0.864408	-0.268168
RPS23	0.598857	0.977235	0.0913949
RAB14	0.948856	0.999587	-0.0090437
TMED10	0.42586	0.956386	-0.117247
VCL	0.132301	0.877119	0.217104
DCTN2	0.410408	0.953818	0.090778
RPS4X	0.723747	0.983171	-0.0512884
DEK	0.597681	0.977235	-0.0862398
CALR	0.180286	0.901258	-0.223181
RPL8	0.159585	0.894627	-0.259885
RPL5 /// SNORD21	0.712196	0.981799	0.0411286
RERE	0.200515	0.90739	-0.145829
HSBP1	0.0153574	0.630619	-0.377254
HMGN1	0.51639	0.968642	0.189312
HMGN1 /// LOC101927733	0.799108	0.991998	-0.040384
SEC31A	0.12209	0.870681	0.198879
GLUD1	0.354074	0.945609	-0.18842
MLF2	0.121907	0.870681	-0.337975
RPS20 /// SNORD54	0.452812	0.960336	0.111134
ARPC1A	0.0247809	0.682917	-0.391461
CCND2	0.576876	0.977235	-0.0698184
ATP6V0C	0.984672	0.999587	-0.00424598
IMMT	0.178036	0.901258	-0.249513
SSRP1	0.124415	0.872802	-0.231323
SDCBP	0.668258	0.981306	-0.0677148
FUS	0.169517	0.901258	-0.166335
CLTA	0.943531	0.999587	0.00969313
SEPHS2	0.188115	0.901258	-0.227285
RPL31	0.912235	0.999587	0.0197688
UBA1	0.481926	0.96612	-0.244396
ABLIM1	0.114467	0.862333	0.340153
ALDOA	0.986498	0.999587	-0.00498823
PPIB	0.255583	0.930431	-0.37479
LOC101928061 /// SERP1	0.465749	0.962215	-0.0773913
SERP1	0.327415	0.940003	-0.269204
TSPAN3	0.430758	0.956386	-0.128993
ACTA2	0.32661	0.940003	-0.119593
PPT1	0.436377	0.957962	-0.163633
TAX1BP1	0.508271	0.968642	0.141941
MDH1	0.337443	0.942316	-0.216378
PDHA1	0.968425	0.999587	-0.00512953
ANXA6	0.128019	0.872802	-0.334099
CD59	0.362923	0.949507	0.153873
SERPING1	0.00385877	0.537838	-0.94593
PSME3	0.722585	0.983171	-0.04425
HIF1A	0.479588	0.965448	0.15506
TRIM28	0.774631	0.990372	-0.0912448
SNX17	0.0872071	0.825917	-0.459185
IPO7	0.025063	0.68568	0.257031
ACTR3	0.136134	0.88059	0.201577
RBM14-RBM4 /// RBM4	0.992491	0.999587	-0.00154578
CKAP4	0.360151	0.948932	0.225387
AARS	0.454019	0.960562	-0.126963
TMEM189 /// TMEM189-UBE2V1 /// UBE2V1 /// UBE2V2	0.097646	0.838495	0.245844
SSR4	0.0604362	0.769696	-0.409402
CD9	0.29192	0.932747	0.385877
PRDX2	0.162694	0.895867	0.178647
HADHB	0.799655	0.991998	0.0383759
TXNIP	0.65087	0.981221	-0.117419
RPN1	0.27984	0.932747	-0.284373
ANXA1	0.331972	0.942113	-0.218974
PAICS	0.0259111	0.69171	-0.256078
JUP	0.64417	0.981221	-0.149202
EIF1AX	0.147348	0.885264	0.197148
YWHAH	0.304934	0.934494	0.237567
DSTN	0.154999	0.89313	0.171516
TAF7	0.741864	0.984484	0.0760428
EIF5B	0.154687	0.89313	0.15643
CD99	0.316709	0.936549	0.139373
LDHB	0.859496	0.996292	-0.0315187
HNRNPH1	0.658148	0.981221	-0.0534979
BLCAP	0.346247	0.945609	0.11617
RPLP0	0.634612	0.9809	-0.0735338
ADD3	0.61878	0.979693	0.0632061
HADH	0.194585	0.90203	0.131711
PFKP	0.669476	0.981306	0.097566
ANP32A	0.950481	0.999587	-0.00923863
RAD23A	0.0494862	0.76002	0.502164
GNAI2	0.355815	0.946355	-0.219567
DUSP1	0.00528715	0.537838	-0.69035
TGM2	0.0893458	0.827556	0.2771
RAB6A /// WTH3DI	0.0684726	0.800209	0.149786
RPS18	0.68989	0.981306	-0.0869773
PLD3	0.00676726	0.561101	-0.639607
PSMF1	0.250924	0.927724	0.238321
HNRNPA0	0.504805	0.968642	0.0922946
GOLGB1	0.496023	0.967352	0.0922812
MYL9	0.0067558	0.561101	1.10801
CTTN	0.0311982	0.696485	0.277115
STOM	0.00373138	0.537838	0.610022
RCN1	0.951503	0.999587	0.00883163
LOC100996696 /// PABPC4	0.601081	0.97786	0.0963196
GTF2I /// GTF2IP1 /// LOC100093631	0.105439	0.849268	0.386004
CYC1	0.371807	0.949507	-0.217641
PSMC2	0.485492	0.966617	0.152225
MMP2	0.367505	0.949507	-0.196124
SF3B1	0.279124	0.932747	0.21226
SMARCC1	0.0365416	0.708058	0.300354
NHP2L1	0.626032	0.979973	-0.0587099
ANXA2 /// NHP2L1	0.106673	0.854667	-0.277221
TM9SF2	0.280052	0.932747	0.131576
SYNGR2	0.671556	0.981306	-0.0886754
PIP4K2B	0.539616	0.973298	-0.152133
DCTN1 /// SLC4A5	0.956421	0.999587	-0.0151721
BCLAF1	0.527939	0.971389	0.101102
SON	0.0321976	0.696485	0.340165
PXN	0.159456	0.894627	-0.118587
KPNA2	0.247339	0.92619	0.201162
ATP6V1B2	0.69659	0.981306	-0.0636063
TUBA1B	0.201075	0.90739	-0.170554
RBBP7	0.205681	0.907747	0.199918
SDHA	0.927143	0.999587	0.0167916
RPS29	0.395498	0.951753	-0.140468
DAP	0.237778	0.922037	0.293948
ARF4	0.0944885	0.834507	0.223284
COPB2	0.637654	0.981221	0.0890007
USP9X	0.0607867	0.769696	0.323149
PFKL	0.933674	0.999587	-0.0108777
NBPF10 /// NBPF11 /// NBPF12 /// NBPF14 /// NBPF15 /// NBPF20 /// NBPF8 /// NBPF9	0.877632	0.998399	0.0259505
NBPF10 /// NBPF11 /// NBPF14 /// NBPF15 /// NBPF19 /// NBPF20 /// NBPF25P /// NBPF26 /// NBPF8 /// NBPF9	0.106095	0.851472	-0.232245
LGALS1	0.0975557	0.838495	-0.725838
GPX4	0.927791	0.999587	0.0180496
THBS1	0.00263128	0.537838	0.285243
CSE1L	0.47232	0.963097	0.0603837
TUFM	0.428129	0.956386	-0.266018
PSMA7	0.978196	0.999587	0.00771315
POLD2	0.959549	0.999587	0.0146113
CPE	0.226552	0.915506	-0.137464
PGD	0.550804	0.974428	-0.158542
COX8A	0.26811	0.932747	-0.330895
PGRMC1	0.928835	0.999587	-0.0150491
EIF5A	0.107319	0.857735	-0.276905
ITGB5	0.157826	0.894101	0.171656
MGAT1	0.0481435	0.753078	-0.344483
ACLY	0.495795	0.967088	-0.0891621
SRSF7	0.652479	0.981221	-0.0425107
CDH1	0.786421	0.991118	0.0372171
HNRNPH2 /// RPL36A-HNRNPH2	0.326319	0.940003	-0.256468
PJA2	0.649562	0.981221	0.104239
COX7C	0.618911	0.979693	-0.116129
ECHS1	0.077825	0.812227	-0.481149
PLP2	0.964741	0.999587	-0.00947454
HLA-DPB1	0.0445736	0.736483	-0.354187
SSB	0.860444	0.996292	-0.0286435
RAB5C	0.349426	0.945609	-0.25
GPNMB	0.984387	0.999587	-0.00327632
EIF2S1	0.238129	0.922163	0.130233
HAX1	0.161208	0.894627	-0.259787
NFE2L2	0.585434	0.977235	0.121612
TIMP3	0.792136	0.991684	-0.0244638
MBNL1	0.23214	0.918167	0.128511
MFN2	0.0804961	0.820441	0.246698
NMT1	0.79066	0.991626	0.0382234
YBX3	0.318276	0.936738	0.198638
IGFBP7	0.433866	0.957962	0.121645
PUM1	0.00371479	0.537838	0.372266
ARHGDIA	0.59954	0.977235	-0.109832
BHLHE40	0.247455	0.92619	-0.299995
NUDC	0.146724	0.885264	-0.141332
TERF2IP	0.0202238	0.6702	0.804365
TMX2	0.126767	0.872802	-0.191221
ARCN1	0.999393	0.999837	-0.000153897
UBA2	0.481314	0.96612	0.155568
FBXO7	0.35126	0.945609	0.296826
GNAI3	0.365049	0.949507	-0.11486
CHD4	0.659997	0.981221	0.0817394
HTRA1	0.640515	0.981221	0.152651
LRPAP1	0.69793	0.98143	-0.0862411
ITPR3	0.940191	0.999587	0.0106465
PITPNA	0.516471	0.968642	-0.108515
IDH1	0.840597	0.995989	-0.042051
SEPW1	0.188118	0.901258	-0.32216
SLC7A5	0.0459227	0.736483	0.630213
AMD1	0.427762	0.956386	-0.0919454
PSMD1	0.945948	0.999587	-0.0129164
CREG1	0.0851344	0.825917	0.744664
CSTB	0.144909	0.885264	-0.294186
PCNA	0.388859	0.950348	0.202019
RRBP1	0.712703	0.981799	0.0641702
TNFAIP1	0.698194	0.981598	0.0913079
HDAC1	0.684475	0.981306	-0.0777372
DDX3X	0.818696	0.993991	0.032871
LGMN	0.115124	0.863427	0.528841
PPP1R7	0.510922	0.968642	-0.113345
PLS3	0.460311	0.961946	0.0833857
ERP29	0.177591	0.901258	-0.259804
RNU86 /// RPL3 /// SNORD83B	0.443334	0.958728	-0.157282
CTBP2	0.31653	0.936549	-0.100691
SNRNP70	0.958303	0.999587	-0.00462483
RAD23B	0.109937	0.85988	0.181652
SRRM1	0.0746371	0.805542	0.295309
NDUFB8	0.533576	0.973099	-0.0682805
ARIH2	0.451244	0.960336	0.0620416
ENO1	0.0614719	0.769696	-0.380196
PSMD13	0.206706	0.907747	-0.290634
ILK	0.391605	0.95149	-0.141856
BTG2	0.4083	0.953818	-0.128106
CAPZA2	0.391404	0.95149	-0.216374
SPCS2	0.458789	0.961946	-0.0976474
DDX1	0.170865	0.901258	-0.356905
ATP1B1	0.32555	0.940003	0.155318
RAF1	0.0608557	0.769696	-0.343476
LOC101927673 /// OTUB1	0.926744	0.999587	-0.0116413
SREBF2	0.189371	0.901258	-0.211921
SLC2A1	0.0173826	0.641119	1.06522
PKM	0.693317	0.981306	-0.0771857
PSMC4	0.416207	0.953818	0.225647
CDIPT	0.0338258	0.698222	0.65125
BAG6	0.0423067	0.733265	0.45396
COX7A2L	0.316287	0.936549	0.13985
RPS16	0.823363	0.994411	0.0386962
SYPL1	0.664717	0.981306	-0.0388464
BGN	0.982581	0.999587	0.0024422
TARS	0.922958	0.999587	0.0243725
COPE	0.336831	0.942316	-0.199733
TXNRD1	0.910832	0.999587	0.0140015
PSMC3	0.552482	0.974428	0.185376
NME1-NME2 /// NME2	0.172503	0.901258	-0.305826
NUDCD3	0.302925	0.934494	-0.152225
RALY	0.462337	0.961946	-0.148035
AKR1B1	0.12627	0.872802	-0.255009
SRP9	0.292328	0.932913	0.247905
PSMA5	0.332023	0.942113	-0.228425
FDPS	0.793294	0.991684	-0.0745934
RAB5B	0.259999	0.93242	0.180303
HNRNPAB	0.929788	0.999587	0.0189227
DAB2 /// LOC101926921	0.34496	0.945609	0.147738
ADRM1	0.346456	0.945609	-0.255419
OGDH	0.598599	0.977235	-0.154346
TRAK1	0.523888	0.969778	-0.0946297
APEH	0.833932	0.99557	0.0516629
MKRN1	0.181613	0.901258	0.43572
SDC1	0.23763	0.922037	-0.149891
ARHGDIB	0.692332	0.981306	-0.0512194
CYR61	0.185837	0.901258	-0.224494
SEC11A	0.0946756	0.834507	-0.244777
TOP2A	0.0779139	0.812227	0.383997
LOC101060363 /// PPIA	0.152435	0.89313	-0.167531
WSB1	0.386008	0.949507	-0.158263
MOB1A	0.619053	0.979693	0.060526
PRNP	0.265362	0.932747	-0.145851
ANXA4	0.764589	0.987804	-0.0552995
EIF4A3	0.603713	0.97786	-0.0926631
NDUFA5	0.235654	0.922037	-0.15518
ANP32B	0.0446875	0.736483	0.424144
SEPT11	0.363417	0.949507	0.0955893
NREP	0.909449	0.999587	0.0213808
SH3BGRL	0.400836	0.952612	0.129817
ENO2	0.598064	0.977235	-0.082683
STK25	0.420647	0.954481	0.143159
IFITM2	0.0165478	0.639735	-0.620325
PSMA2	0.261321	0.932747	-0.137836
MYL12A /// MYL12B	0.799771	0.991998	0.0435117
MYL12A	0.128003	0.872802	-0.663661
SMARCC2	0.205479	0.907679	0.196142
ATP5B	0.0288063	0.696485	0.318272
EBNA1BP2 /// MIR6733	0.920335	0.999587	0.0124498
EMP1	0.59831	0.977235	-0.0500327
CCT6A	0.391217	0.95149	0.105259
ETS2	0.401912	0.952612	-0.190371
RARS	0.780867	0.991073	-0.0500038
STAT6	0.223168	0.915506	-0.183149
ARHGEF12	0.00294596	0.537838	0.598573
VAMP3	0.0147185	0.627511	-0.444027
GTF3A	0.562616	0.975902	0.094781
SCP2	0.419431	0.953818	0.129788
ENC1	0.411623	0.953818	0.0988015
SNRPC	0.272923	0.932747	-0.267217
UBE2D2	0.484304	0.966617	0.0691951
ADIPOR2	0.704758	0.981799	-0.0591418
GRHPR	0.0352197	0.702761	-0.253652
GPX3	0.0465748	0.738801	0.473882
SLC9A3R1	0.935677	0.999587	-0.0140322
FLOT2	0.182937	0.901258	-0.280574
YME1L1	0.34653	0.945609	0.0877181
BAZ2A	0.934669	0.999587	-0.00995896
SF3A1	0.90877	0.999587	0.015691
COPB1	0.112031	0.85988	0.252121
CST3	0.0182311	0.652576	-0.746819
TMEM109	0.152333	0.89313	-0.251549
IVNS1ABP	0.531253	0.972399	0.124613
OAZ2	0.57591	0.977235	-0.101648
ANXA7	0.0331509	0.696485	0.332025
ZFP36L2	0.746569	0.98534	0.0592583
CUL3	0.249053	0.926239	0.140742
PLEC	0.836836	0.995814	0.0462471
PPP2CB	0.66007	0.981221	-0.036308
HNRNPF	0.798415	0.991998	-0.064298
UBAP2L	0.500252	0.968642	0.0617195
TPD52L2	0.0423194	0.733265	-0.409879
CRTAP	0.405258	0.953818	0.210963
CACYBP	0.524578	0.969865	-0.0669747
NBR1	0.198263	0.906999	0.199268
DHX15	0.899557	0.999587	-0.0161305
UCHL1	0.111756	0.85988	-0.334546
PSMD3	0.493251	0.966823	-0.183351
ITGA5	0.16489	0.897875	-0.311084
CSNK2B	0.748148	0.985787	0.0719742
TRAP1	0.656899	0.981221	0.0781544
IGF2R	0.467691	0.962474	0.156726
RBM5	0.692825	0.981306	-0.0535403
SGTA	0.774718	0.990372	-0.0679465
PHGDH	0.575546	0.977235	-0.103516
TRAM1	0.923125	0.999587	0.012104
PSMB3	0.0680131	0.800209	-0.429717
ADRBK1	0.531817	0.973099	-0.0851961
MGST3	0.262847	0.932747	-0.220305
COPS6	0.563918	0.975902	-0.0795901
RPL36A /// RPL36A-HNRNPH2	0.590975	0.977235	-0.190326
PPP1CB	0.100893	0.845438	0.297896
PLEKHB2	0.882881	0.998744	-0.0264245
LRP10	0.494723	0.966884	0.112634
HSD17B4	0.905847	0.999587	-0.0277134
NAP1L4	0.908136	0.999587	-0.0230183
GSS	0.786461	0.991118	-0.0375496
SOX4	0.30204	0.934494	-0.12292
BAP1	0.170999	0.901258	-0.270484
WDR77	0.428319	0.956386	-0.110666
IFI30 /// PIK3R2	0.021908	0.673456	-0.797229
CUL4A	0.158615	0.894587	0.288672
ALDH2	0.616817	0.979693	0.0783156
VIM	0.78384	0.991073	0.0554275
SEPP1	0.198269	0.906999	0.192376
CLDN4	0.958643	0.999587	0.00454317
RPL37A	0.568884	0.976799	0.0859011
DPYSL3	0.505978	0.968642	-0.0839707
CAT	0.15825	0.894101	0.28693
PTDSS1	0.685002	0.981306	-0.0593181
TTC1	0.691022	0.981306	0.0627929
EIF4E	0.22611	0.915506	-0.155034
COL6A3	0.561717	0.975902	0.108873
GBF1	0.462593	0.961946	0.128139
DDX23	0.59154	0.977235	0.130288
COX6B1	0.19245	0.901546	-0.259028
ATP6AP2	0.0813311	0.822351	-0.182683
CNN3	0.160624	0.894627	-0.33085
TIA1	0.417592	0.953818	0.113199
RHEB	0.388944	0.950351	0.0862489
NPEPPS	0.312943	0.936549	0.15228
BUB3	0.418198	0.953818	0.125848
RUVBL2	0.307612	0.934494	0.227258
MAPKAPK2	0.117834	0.866516	-0.149649
SCRN1	0.40893	0.953818	-0.149112
TALDO1	0.501849	0.968642	0.127391
JUN	0.348685	0.945609	-0.107217
NQO1	0.527023	0.971373	-0.0584899
SHC1	0.328166	0.94045	0.140733
GSTO1	0.146022	0.885264	-0.321542
SQSTM1	0.919548	0.999587	-0.00845556
VBP1	0.206889	0.907747	0.258762
JUNB	0.590093	0.977235	-0.158211
ITGA3	0.851735	0.995989	0.0363505
MARS /// MIR6758	0.0483301	0.754458	-0.212804
RRM1	0.780525	0.991073	0.036703
DKC1 /// MIR664B /// SNORA56	0.52831	0.971444	-0.0671954
SUPT5H	0.215999	0.911149	0.183132
PYGB	0.491961	0.966823	0.0646642
QSOX1	0.451641	0.960336	-0.17149
SUPT4H1	0.499437	0.968642	-0.106057
RCN2	0.329791	0.940933	0.222558
CTSC	0.97315	0.999587	0.00765958
PPIF	0.206178	0.907747	-0.400814
AHSA1	0.376513	0.949507	-0.157154
RPL41	0.473137	0.963097	0.090439
PUM2	0.970447	0.999587	0.00435929
PRCP	0.441778	0.958522	-0.126611
MYH11	0.617967	0.979693	0.0536175
USP7	0.00444183	0.537838	0.406544
PPP1R11	0.402937	0.953818	-0.131459
GRSF1	0.38088	0.949507	0.09861
NFKBIA	0.220914	0.915506	-0.411533
G3BP1	0.52004	0.968642	0.121828
TSN	0.915155	0.999587	0.0133781
LAMB1	0.516073	0.968642	-0.0519467
TGFBI	0.140839	0.881265	-0.256914
PFDN1	0.552278	0.974428	-0.0931694
IGFBP4	0.636635	0.981048	0.0769152
IDH3B	0.145102	0.885264	-0.219186
ELF3	0.495496	0.966884	-0.134022
AAMP	0.185704	0.901258	-0.208728
TOMM70A	0.852383	0.995989	-0.0228187
SRM	0.139161	0.88059	-0.276693
NCBP2	0.595547	0.977235	-0.0778177
CBX1	0.94679	0.999587	0.0111991
SNRPN /// SNURF	0.00294232	0.537838	-0.422273
UBE2N	0.26098	0.932747	-0.174814
APOD	0.299275	0.934494	0.271032
ARF5	0.229321	0.916168	-0.244329
ATP6V1F /// LOC101927180	0.5601	0.974428	-0.122786
RPA1	0.0353268	0.703077	0.417556
EIF4A1 /// LOC101928634 /// SENP3-EIF4A1 /// SNORA48 /// SNORA67 /// SNORD10	0.0409727	0.72856	-0.307989
ZFP36	0.255723	0.930431	-0.378313
PSMA3	0.0616283	0.770232	-0.705629
CTNNB1	0.551424	0.974428	0.170743
UBL3	0.36845	0.949507	0.096912
DUSP3	0.314447	0.936549	-0.14587
FHL1	0.108713	0.859474	0.181764
ZNHIT1	0.423877	0.955346	-0.25841
SAR1A	0.70582	0.981799	-0.069787
BCL2L2 /// BCL2L2-PABPN1 /// PABPN1	0.391597	0.95149	0.118865
BCL2L2-PABPN1 /// PABPN1	0.0041025	0.537838	-0.545744
TRIP12	0.00922839	0.574087	0.629337
KDM5B	0.210853	0.911149	0.123932
ACTB /// ACTG1	0.553791	0.974428	0.0583916
LAMP1	0.436838	0.957962	-0.145241
GYG1	0.405238	0.953818	0.260663
MCM3	0.731768	0.983448	-0.0675947
VAMP2	0.856104	0.996292	-0.0350038
RAE1	0.574871	0.977235	0.0508264
CLIC4	0.784938	0.991073	0.0250149
CLSTN1	0.943758	0.999587	-0.0134474
SORD	0.276976	0.932747	0.189003
FSCN1	0.978715	0.999587	0.0045775
ID2	0.0410657	0.72856	0.317416
GOLGA4	0.585765	0.977235	-0.0813229
UQCRQ	0.22682	0.915506	-0.261206
SAMM50	0.511756	0.968642	-0.139568
DCTD	0.793983	0.991782	-0.0366963
ETF1	0.0862317	0.825917	-0.221433
SNW1	0.826	0.994411	-0.0250967
GLB1 /// TMPPE	0.404098	0.953818	-0.112501
NME1	0.14434	0.885264	-0.280694
PODXL	0.625022	0.979973	0.0943107
FAT1	0.486485	0.966823	-0.113142
TMX4	0.129407	0.872802	0.176413
SEC23B	0.589657	0.977235	0.0850276
DDX39A	0.385382	0.949507	-0.142957
SFPQ	0.3523	0.945609	0.168176
IRAK1	0.451965	0.960336	-0.142753
TXNL1	0.00613667	0.554957	0.328339
SMC1A	0.920922	0.999587	0.0133258
ANXA2	0.11256	0.85988	-0.408892
NISCH	0.913883	0.999587	-0.0180294
EIF3H	0.145688	0.885264	0.268841
ZC3H15	0.907354	0.999587	-0.0211502
PPP4R1	0.357162	0.946355	-0.152707
KRT18	0.226438	0.915506	0.249287
COX7A2	0.49726	0.968331	-0.131309
INPPL1	0.108163	0.858726	-0.296199
OAT	0.0190464	0.6581	0.549572
PHB2	0.50231	0.968642	-0.0984672
IFITM1 /// IFITM2	0.0161498	0.639735	-0.436475
PPP1R12A	0.596683	0.977235	0.0949694
CNN2	0.0708186	0.800209	-0.286935
PWP1	0.681151	0.981306	-0.0435667
ICMT	0.704967	0.981799	-0.0507604
ALDH9A1	0.865548	0.997856	0.0313965
AP1G2	0.831781	0.995392	-0.032297
RUVBL1	0.466526	0.962474	-0.20948
CALD1	0.347374	0.945609	0.0723537
GPAA1	0.190996	0.901258	-0.235261
PRDX3	0.134474	0.879445	-0.184945
MBTPS1	0.0242698	0.682917	-0.317689
NBL1	0.649911	0.981221	0.0399288
SND1	0.945131	0.999587	-0.0167879
DARS	0.881773	0.998744	-0.0290573
INSIG1	0.475005	0.963635	-0.103904
RRAGA	0.84455	0.995989	0.0462452
ACP1	0.379608	0.949507	-0.161839
IER3	0.313645	0.936549	-0.224544
EIF2B1	0.76859	0.988438	0.0817928
CYB5B	0.625874	0.979973	0.0899073
FXR1	0.791621	0.991684	0.0340193
CPSF1	0.720106	0.983054	-0.0391146
CPSF1 /// MIR1234 /// MIR6849 /// MIR939	0.918327	0.999587	0.0271006
CLPTM1	0.978921	0.999587	0.00419491
BST2	0.00377854	0.537838	-0.705568
IFNGR2	0.227601	0.915506	-0.221086
KDM3B	0.38223	0.949507	0.135711
TSTA3	0.110251	0.85988	0.421019
TNC	0.498537	0.968518	-0.0818628
SCARB2	0.414548	0.953818	-0.118018
JAK1	0.408476	0.953818	0.146058
UBE2L6	0.195047	0.902666	-0.251751
KRT19	0.966188	0.999587	0.00360427
PACSIN2	0.618804	0.979693	0.126226
COPS5	0.541321	0.973532	-0.113373
CNIH1	0.707659	0.981799	-0.0624768
HSPG2	0.914273	0.999587	0.0118802
ITGA6	0.664954	0.981306	-0.0779941
ARL1	0.459592	0.961946	-0.107503
ACSL3	0.985575	0.999587	-0.00309106
SMC4	0.173707	0.901258	0.194076
RPS17	0.338464	0.942316	0.255019
TIMP1	0.505549	0.968642	-0.211404
GJA1	0.0725155	0.800209	-0.213242
MARCKS	0.593881	0.977235	0.150388
USP14	0.401532	0.952612	0.0913055
GYS1	0.287225	0.932747	0.137449
AKAP1	0.683539	0.981306	-0.049582
PSMA1	0.760748	0.987015	0.0326165
HMCES	0.750692	0.986576	-0.0520315
SRRT	0.83349	0.99546	-0.0170167
DLG5	0.702348	0.981799	-0.0408775
PMPCB	0.698064	0.981517	-0.198915
TOX4	0.750779	0.986576	0.032776
API5	0.526558	0.971373	0.0494208
TPD52	0.495497	0.966884	-0.0701773
SIGMAR1	0.60673	0.978091	-0.0707971
EGR1	0.00104558	0.484285	-0.839781
PNP	0.0347903	0.700732	0.906553
SRSF4	0.501804	0.968642	0.124589
DNMT1	0.0422644	0.733265	0.329043
PSMC6	0.853782	0.995989	0.0538687
CCND3	0.519124	0.968642	-0.109414
PGRMC2	0.471199	0.963097	0.08922
PPP1R10	0.277566	0.932747	-0.16261
ENTPD6	0.647851	0.981221	0.132292
PSMD7	0.832021	0.995392	-0.0373209
PEX19	0.853841	0.995989	-0.035625
NIPSNAP1	0.741874	0.984484	-0.0519023
MYBL2	0.289721	0.932747	-0.273735
RANBP2	0.0221204	0.673456	0.358181
TUBG1	0.308212	0.934494	0.183011
ACIN1	0.744722	0.985042	0.103264
SNX1	0.685856	0.981306	-0.0485021
MRPL49	0.0524295	0.764425	-0.244433
EPB41L2	0.0149824	0.628243	0.304515
LAPTM5	0.0406444	0.726486	-0.298164
GALNT1	0.284239	0.932747	-0.127387
CDC123	0.139945	0.88059	-0.19861
ELAVL1	0.594915	0.977235	0.089415
KIAA0100	0.989555	0.999587	0.0039493
TPR	0.416188	0.953818	0.126396
CLCN3	0.00371436	0.537838	0.53302
MARCH6	0.127634	0.872802	0.185028
EIF1B	0.110841	0.85988	0.40152
SGK1	0.102345	0.845892	-0.350749
NDUFS3	0.0168492	0.639735	-0.367651
SRSF1	0.289393	0.932747	-0.140148
CD14	0.194257	0.90203	-0.49192
LUM	0.771472	0.988744	0.0258397
TWF1	0.314504	0.936549	-0.115426
TP53	0.983229	0.999587	-0.00465413
SAFB	0.753724	0.986594	-0.0462135
ECE1	0.765646	0.988143	-0.0421116
JOSD1	0.92178	0.999587	0.0330747
COX6C	0.368293	0.949507	-0.210949
MCM5	0.612171	0.979693	-0.125159
RPA2	0.0128787	0.599772	-0.311019
NDUFS5 /// RPL10	0.231562	0.917853	-0.313021
TSG101	0.334995	0.942316	0.165527
TBCD	0.494234	0.966823	-0.168506
WSB2	0.595201	0.977235	-0.0926685
MTHFD2	0.181957	0.901258	-0.228607
MIR7703 /// PSME2	0.0520462	0.764425	-0.348924
DAXX	0.621623	0.979964	-0.0737015
TMEM106C	0.398696	0.951753	-0.20809
HEXA	0.0494154	0.76002	0.361551
ELAC2	0.63735	0.981147	0.0769654
CLINT1	0.643859	0.981221	0.0731251
SNRPA	0.464783	0.96205	-0.142781
SCAMP3	0.996241	0.999717	0.000779363
AZIN1	0.445256	0.958728	0.0923233
ADNP	0.0840658	0.825917	0.34614
NCAPD2	0.217684	0.911149	0.296418
EFCAB14	0.652234	0.981221	0.0540842
RNF13	0.730711	0.983448	-0.0770604
AIP	0.272895	0.932747	-0.1787
RELA	0.302134	0.934494	-0.121733
RNASE1	0.952558	0.999587	-0.0107986
ADAR	0.202971	0.90739	-0.221693
FBLN1	0.716809	0.982737	-0.0335291
DDX42	0.584709	0.977235	0.0703256
PCNXL4	0.664404	0.981306	0.0331327
DHCR7	0.771065	0.988744	-0.0569183
AEBP1	0.680642	0.981306	-0.0663665
SMG7	0.600134	0.977353	-0.0463784
LBR	0.87704	0.997981	0.0473882
VARS	0.128987	0.872802	-0.274183
MYOF	0.140376	0.881265	-0.244307
OSBP	0.839514	0.995942	-0.0366374
SLC29A1	0.464645	0.96205	-0.135968
POLR2B	0.413551	0.953818	0.147104
TBCB	0.450063	0.959811	-0.206118
PRKAG1	0.157593	0.894101	-0.228766
ATXN2L	0.0836092	0.825917	0.320243
VPS26A	0.0184608	0.65595	0.354971
ENG	0.658771	0.981221	-0.0676508
SH3BP5	0.54763	0.974428	0.0964628
C4orf46 /// TOMM7	0.782124	0.991073	-0.0629537
TBC1D5	0.654679	0.981221	0.046071
GBAS	0.540902	0.973532	-0.117028
UBE3C	0.274407	0.932747	-0.221686
LPCAT1	0.353186	0.945609	-0.323611
SCARB1	0.567778	0.976138	-0.0744273
KRT5	0.564797	0.975902	-0.160009
TIMM17A	0.554905	0.974428	-0.0652901
RNF14	0.0917589	0.830172	0.431601
SCCPDH	0.696958	0.981306	0.0596043
SMARCD2	0.783995	0.991073	0.0475362
FAM127A	0.628224	0.979973	0.073084
NET1	0.0653429	0.787713	0.637154
USO1	0.902001	0.999587	0.0297192
HDAC2	0.112005	0.85988	0.260527
PRKAB1	0.351026	0.945609	-0.096027
SUPT7L	0.385749	0.949507	-0.106415
EPCAM	0.0987279	0.841438	0.329336
NEDD8	0.582311	0.977235	-0.0876855
HSPB1	0.292676	0.932913	-0.37418
EFEMP1	0.587344	0.977235	-0.0783097
RYBP	0.161693	0.894981	0.208209
LIPA	0.18065	0.901258	0.301597
BNIP3	0.302704	0.934494	0.0898111
CAPG	0.0421328	0.733265	-0.413854
SH3GL1	0.606504	0.978026	0.114315
COL3A1	0.573603	0.977235	-0.0619991
CDC25B	0.306361	0.934494	0.171944
ATMIN	0.093555	0.831908	0.284718
ZFR	0.56486	0.975902	0.0666327
SRGN	0.0557646	0.765903	-0.290175
PLAT	0.943263	0.999587	-0.0171717
LRRFIP1	0.247214	0.92619	-0.112874
FAM32A	0.374965	0.949507	-0.190362
GDI1	0.166565	0.897939	-0.20745
NR3C1	0.866926	0.997856	-0.0213295
TBL1X	0.608292	0.978852	0.0984499
TOMM34	0.875901	0.997935	-0.0293088
UBXN1	0.899266	0.999587	0.0160586
ABCE1	0.980455	0.999587	0.0032917
MPZL1	0.0037243	0.537838	-0.356471
PON2	0.488489	0.966823	0.0885379
PPP2R5C	0.927964	0.999587	-0.00989567
ARIH1	0.0704562	0.800209	0.159005
B4GALT1	0.388518	0.95015	-0.0804175
CEACAM5	0.848015	0.995989	-0.0372389
CYB5R3	0.0344074	0.698222	0.48798
DCAF11	0.795803	0.991998	0.0437718
IL13RA1	0.0311904	0.696485	-0.302918
FAM3C	0.739	0.984484	-0.0647262
RRM2	0.325045	0.940003	0.260787
B2M	0.679141	0.981306	-0.0498635
IMPDH2	0.0791515	0.815344	-0.340055
DCN	0.409867	0.953818	0.105997
ARAF	0.366029	0.949507	-0.160132
PSRC1	0.18618	0.901258	-0.22355
CKS1B	0.854568	0.996074	-0.0284392
UBE2A	0.425492	0.956386	0.100262
AKR1A1	0.0785451	0.813403	-0.338463
UQCRC1	0.0245571	0.682917	-0.486808
CTDSPL	0.201894	0.90739	0.163711
DVL3	0.762441	0.987015	-0.0413703
RPS4Y1	0.788479	0.991283	0.231751
FARP1	0.417167	0.953818	-0.128337
GSPT1	0.0785604	0.813403	0.612057
COASY	0.963295	0.999587	0.0110094
SEC63	0.551406	0.974428	0.0475904
SLC25A36	0.770034	0.988508	-0.0446582
SLC20A1	0.53562	0.973102	0.214118
GNG10	0.486146	0.966823	-0.166791
NSA2	0.243719	0.924722	-0.24203
PRDX4	0.254181	0.929459	-0.175117
AFF1	0.146991	0.885264	0.20182
CD55	0.53498	0.973099	0.135314
PKP4	0.509611	0.968642	-0.0751671
MCM6	0.00633106	0.554957	0.520523
ETFA	0.0921313	0.830172	0.38743
LRRC41	0.137275	0.88059	-0.2135
CHMP1A	0.612731	0.979693	-0.0862287
WDR82	0.0603971	0.769696	0.370903
EIF4G3	0.0505554	0.764394	0.394207
DNPEP	0.1041	0.845892	-0.237355
CDK2AP1	0.461469	0.961946	0.142064
PLK2	0.503958	0.968642	0.0691278
CPD	0.901243	0.999587	-0.0161341
HEXB	0.0728422	0.800209	-0.318324
FURIN	0.0710767	0.800209	0.426892
CCT2	0.820816	0.994095	0.0403119
GNL2	0.00327752	0.537838	0.404864
CAPZB	0.153681	0.89313	-0.175924
ALCAM	0.316804	0.936549	0.167479
CIB1	0.0632537	0.778366	-0.26682
ARPC1B	0.31651	0.936549	-0.25599
CCNC	0.850119	0.995989	0.0309075
GNPAT	0.483475	0.966592	0.122802
PPP1R12B	0.345666	0.945609	-0.107295
MYCBP2	0.501064	0.968642	0.151336
RNF41	0.329498	0.940933	0.181598
ACSL1	0.323637	0.939613	-0.265895
SETX	0.395246	0.951753	0.15344
NDUFS2	0.964381	0.999587	0.0076012
RBM6	0.980366	0.999587	-0.00383053
PGM1	0.456957	0.961946	0.101835
NASP	0.20997	0.911149	-0.259846
ATP6V1A	0.619438	0.979693	-0.0726857
CCZ1 /// CCZ1B	0.479017	0.965265	-0.097416
CCZ1	0.204877	0.907679	0.266443
CLIP1	0.599495	0.977235	0.0593897
MYO10	0.799698	0.991998	-0.0452427
KIAA0141	0.119898	0.869795	-0.230071
PPP5C	0.626128	0.979973	-0.0741399
RSU1	0.586557	0.977235	0.0574833
PAPPA	0.989095	0.999587	0.00231481
EGFR	0.494139	0.966823	0.082635
KIAA0196	0.727405	0.983171	0.0581023
MED13	0.09029	0.827863	0.310032
CREBL2	0.195502	0.902747	0.187396
KIF5B	0.464761	0.96205	0.0718179
HNRNPDL	0.52066	0.968642	-0.0764459
MORF4L2	0.631654	0.980867	-0.0765487
EXT1	0.440714	0.958522	-0.108146
SPEN	0.0371398	0.708058	0.305471
ST6GAL1	0.491104	0.966823	0.0607336
DYNLT1	0.0645838	0.785643	-0.519202
NDUFA6	0.371738	0.949507	-0.105625
ACAA2	0.740669	0.984484	-0.065201
SDHC	0.193156	0.90203	-0.177131
ST14	0.915781	0.999587	0.0105395
PTPN12	0.384031	0.949507	0.0884902
NID1	0.533755	0.973099	0.0824102
TWF2	0.264615	0.932747	0.189529
PTGR2 /// ZNF410	0.431205	0.956386	0.144779
TJP1	0.580275	0.977235	0.101365
EXT2	0.789017	0.99159	0.0426463
PPP1R15A	0.367818	0.949507	-0.285741
MEST	0.71232	0.981799	-0.0473651
EPHX1	0.737969	0.984342	0.0717851
LTF	0.00106623	0.484285	1.77423
LANCL1	0.921808	0.999587	0.0117721
EIF1	0.750939	0.986576	-0.0522229
ALDOC	0.104739	0.847307	0.247041
EFNA1	0.780592	0.991073	0.045103
ASNA1	0.675577	0.981306	-0.0612945
ACAA1	0.411701	0.953818	-0.0898904
SDHD	0.356824	0.946355	0.137288
TMEM184B	0.179406	0.901258	-0.251944
RPL38	0.633991	0.980867	0.0744852
BCKDK	0.225974	0.915506	-0.289064
WIPI2	0.0887945	0.825917	0.31135
MAN2A2	0.554676	0.974428	0.0912098
RB1CC1	0.0440791	0.736483	0.367038
SFRP1	0.849124	0.995989	-0.0290087
UBE4A	0.720914	0.983171	0.0519667
MYO18A /// TIAF1	0.302825	0.934494	-0.231909
KDM5A	0.221723	0.915506	0.301462
FIBP	0.158338	0.894101	-0.293552
HARS /// LOC101928623	0.864897	0.997856	-0.0332288
SMS	0.340362	0.942316	0.193636
ARHGAP35	0.177712	0.901258	-0.128393
CBX6	0.268594	0.932747	0.183309
ZMYM4	0.0166324	0.639735	0.259689
RAI14	0.893652	0.999587	-0.0100843
ALDH3A2	0.510028	0.968642	-0.08808
KPNA1	0.0163354	0.639735	0.358723
CTR9	0.143928	0.885264	0.274771
SEL1L	0.634044	0.980867	-0.0552007
PPFIA1	0.898195	0.999587	0.012218
LDLR	0.871938	0.997856	0.0162996
IDH3A	0.492754	0.966823	-0.120353
SDC4	0.956001	0.999587	-0.00758884
HNRNPL	0.371962	0.949507	0.164995
OPTN	0.351482	0.945609	0.181383
PLTP	0.592123	0.977235	0.129555
BIRC2	0.247271	0.92619	0.472019
NDUFAB1	0.969655	0.999587	0.00759074
COPS3	0.779262	0.990964	0.0591341
IER2	0.145132	0.885264	-0.382856
SEC14L1	0.17493	0.901258	0.140866
TJP2	0.707011	0.981799	-0.0638779
MX1	0.00374166	0.537838	-1.3671
CTSL	0.284518	0.932747	-0.316848
SLC39A6	0.469024	0.962913	0.0877759
UQCR11	0.364086	0.949507	0.156673
ARL2BP	0.255712	0.930431	0.15913
PAF1	0.825964	0.994411	0.0427922
BIRC5	0.204662	0.907679	0.157444
TSPO	0.101584	0.845892	-0.437514
NUP153	0.111985	0.85988	0.427526
PRMT2	0.113602	0.85988	0.177504
DGCR2	0.0471203	0.742228	0.219016
RALB	0.0731263	0.801961	-0.353252
BRD4	0.0185997	0.658049	0.424335
LOC101930112 /// SPG7	0.720687	0.983171	0.0793901
IGBP1	0.665368	0.981306	-0.116313
GOLGA3	0.403289	0.953818	0.164454
MCM2	0.373565	0.949507	0.159571
PEPD	0.971427	0.999587	-0.0060822
ARFIP2	0.120063	0.870518	-0.421365
COX7B	0.72542	0.983171	0.125249
SLC4A2	0.306889	0.934494	0.105492
VWF	0.969052	0.999587	-0.0070963
SNX2	0.150867	0.892601	-0.247821
NOC2L	0.445878	0.958728	0.168564
DPF2	0.705528	0.981799	0.113482
ARHGAP1	0.660697	0.981221	-0.0553666
CPNE3	0.00625541	0.554957	0.413447
AP2S1	0.598793	0.977235	0.109157
CHMP2A	0.0850177	0.825917	-0.381962
PLIN3	0.152744	0.89313	-0.257078
ABL1	0.477351	0.96485	0.124577
TRAK2	0.00194829	0.535049	1.00199
PRPF4B	0.457651	0.961946	-0.103035
AREL1	0.81808	0.993991	0.0449035
RIOK3	0.147868	0.886036	0.450045
WWTR1	0.385942	0.949507	-0.0999857
ACTR1B	0.876855	0.997935	0.0451328
ZMYND11	0.320294	0.938589	-0.178751
AIMP2	0.634091	0.980867	-0.0528308
AKR7A2	0.598283	0.977235	-0.0775663
CLK3	0.23472	0.921687	-0.231438
COPS8	0.190941	0.901258	-0.182045
ADSL	0.874135	0.997856	-0.0407797
LY6E	0.0727657	0.800209	-0.72636
IFRD1	0.280184	0.932747	-0.224024
PYCR1	0.92749	0.999587	0.0237471
NEDD9	0.17797	0.901258	-0.172375
UBAC1	0.170867	0.901258	0.31981
USF2	0.455833	0.961946	0.160038
NUP62	0.545802	0.974428	-0.157966
TUBB3	0.663904	0.981306	0.106786
NUP214	0.948707	0.999587	0.00785296
CELF2	0.837925	0.995829	0.0340808
FARSA	0.89083	0.999587	-0.0265789
CREBBP	0.356192	0.946355	-0.11368
PKN1	0.149156	0.889209	-0.387039
CNOT8	0.180435	0.901258	-0.152588
PPP1R2	0.782182	0.991073	0.028744
MMS19	0.874362	0.997856	0.028239
AK6 /// TAF9	0.660721	0.981221	-0.101664
AASDHPPT	0.471479	0.963097	0.100092
VEZF1	0.22384	0.915506	0.158293
PCM1	0.176833	0.901258	0.190966
CHPF	0.915559	0.999587	0.0304565
ERCC3	0.295297	0.934494	0.242091
PRKCZ	0.960746	0.999587	-0.0108153
BLMH	0.00890372	0.573018	0.488178
MVP	0.0587512	0.769696	-0.684832
KIAA0247	0.220492	0.915506	-0.191253
KAT2A	0.517767	0.968642	-0.116092
KIF22	0.487043	0.966823	0.0797991
NUP133	0.39182	0.95149	0.113888
PLOD3	0.705561	0.981799	-0.0714342
PPP2R5A	0.538436	0.973298	0.107727
NUP93	0.694447	0.981306	0.0918642
MIR4745 /// PTBP1	0.381494	0.949507	-0.119669
CSTF1	0.441405	0.958522	0.0983882
GAS7	0.353375	0.945609	-0.158261
LIMK2	0.0167864	0.639735	-0.492566
TMED5	0.849394	0.995989	0.0272514
DKK3	0.519234	0.968642	-0.0517141
MTMR3	0.0521523	0.764425	0.259331
SRPK1	0.888883	0.999587	0.0239758
BLVRB	0.498395	0.968518	-0.184325
LAMA4	0.943079	0.999587	0.00762955
AMFR	0.246718	0.92619	0.26541
VASP	0.971601	0.999587	-0.00929979
ARL4C	0.259754	0.932178	-0.171173
LSM3	0.812631	0.993834	-0.0614733
GSK3A	0.823602	0.994411	-0.0758918
ARFGAP3	0.379756	0.949507	0.189808
PES1	0.231082	0.917773	-0.306346
CUL4B	0.155169	0.89313	-0.156091
NFYC	0.216078	0.911149	-0.243535
C21orf33	0.516994	0.968642	-0.0953486
FADS2	0.154436	0.89313	0.324695
SLC6A8	0.128981	0.872802	0.528076
KIAA0907	0.466761	0.962474	0.109993
EP300	0.349281	0.945609	0.168245
DES	0.92082	0.999587	-0.0146604
STT3A	0.293303	0.933465	-0.176758
CRK	0.163405	0.897732	-0.233236
BRD8	0.164812	0.897875	0.180538
NPTN	0.384595	0.949507	0.146312
CHERP	0.142214	0.883685	0.191239
EIF3M	0.748639	0.986118	-0.0412087
UQCRH /// UQCRHL	0.387213	0.949679	-0.159953
SLC16A1	0.0459273	0.736483	0.417419
LOC101928916 /// NNMT	0.882466	0.998744	-0.019279
PARP4	0.702146	0.981799	0.0541332
PLK1	0.0550218	0.765903	0.428635
TRIB1	0.081506	0.822351	-0.524807
TSPAN7	0.817961	0.993991	0.0630693
PSMB4	0.259419	0.932178	-0.240173
LSS	0.461257	0.961946	-0.0817085
CDK4	0.0795948	0.817419	-0.374931
MTA1	0.3975	0.951753	-0.0971565
E2F4	0.545522	0.974428	0.122887
DCAF8	0.138118	0.88059	0.346207
PRPF3	0.183798	0.901258	0.278768
RAB13	0.179355	0.901258	0.275577
DNM2	0.414246	0.953818	-0.119459
SIPA1L1	0.652704	0.981221	-0.0947945
CD2BP2	0.128654	0.872802	-0.297698
N4BP2L2	0.472916	0.963097	-0.123792
STXBP1	0.692582	0.981306	0.0780033
VPS72	0.799503	0.991998	-0.0340927
DDAH2	0.19233	0.901546	-0.375527
CYB5R1	0.395317	0.951753	0.139378
TOMM40	0.63516	0.981048	-0.0927979
BMI1 /// COMMD3-BMI1	0.881149	0.998744	0.0264078
TDP2	0.48063	0.966103	0.124549
LAMC2	0.550976	0.974428	-0.0944882
NAE1	0.735347	0.983683	-0.0706776
GBP1	0.217566	0.911149	-0.461942
FBXO28	0.375559	0.949507	0.111251
PDGFRB	0.909291	0.999587	0.0247875
ACTG2	0.435404	0.957962	-0.185079
G6PD	0.760508	0.987015	0.110018
SHFM1	0.425802	0.956386	-0.124284
SPTLC1	0.295762	0.934494	-0.124936
C14orf2	0.510125	0.968642	-0.129676
GAK	0.251006	0.927724	0.232862
HSD17B10	0.96771	0.999587	0.00625956
SERPINF1	0.264568	0.932747	0.277981
CDKN1A	0.42161	0.954577	0.113958
TACSTD2	0.119291	0.869194	0.171983
MTOR	0.795203	0.991797	0.031798
TACC2	0.0764003	0.811282	-0.180143
PDAP1	0.897265	0.999587	-0.0200898
MGP	0.563016	0.975902	0.0833559
LYPLA2	0.217286	0.911149	-0.160028
STAG1	0.934858	0.999587	0.0136407
CTSH	0.109221	0.859474	-0.293801
RER1	0.02053	0.6702	-0.222161
NDUFA1	0.0387507	0.721371	-0.701411
LAMTOR5	0.592953	0.977235	0.0931084
RSRC2	0.744061	0.984819	0.0423644
SMARCA5	0.302646	0.934494	0.160638
FNDC3A	0.311262	0.935885	0.156258
FEZ2	0.148593	0.888579	-0.156827
POLR2G	0.308786	0.934494	-0.132687
TAP1	0.020486	0.6702	-0.824359
SREBF1	0.179338	0.901258	-0.350442
MTHFD1	0.0939964	0.833024	0.216068
COL1A1	0.255866	0.930431	-0.126642
PPP2R2A	0.258636	0.931869	0.161186
CYP51A1 /// LRRD1	0.966939	0.999587	0.00515753
BCR	0.107689	0.857735	-0.270769
UBE4B	0.240246	0.922163	-0.103934
SENP6	0.980665	0.999587	0.00312388
GTF3C1	0.117105	0.865255	0.244345
GGPS1	0.819492	0.993991	-0.0310129
ACBD3	0.685625	0.981306	-0.0566932
ATP5J	0.468304	0.962474	-0.196302
EHMT2	0.652417	0.981221	-0.0801714
LOC101930075 /// PKD1	0.784843	0.991073	0.0306215
CSK	0.352268	0.945609	-0.123187
UNG	0.948965	0.999587	-0.00934538
BCKDHA	0.207511	0.907818	-0.409625
CSNK1E /// CSNK1E	0.102594	0.845892	0.239409
UBE2B	0.33966	0.942316	0.144291
PAM	0.128943	0.872802	0.206219
PMF1	0.411211	0.953818	-0.14143
TK1	0.336727	0.942316	0.214427
SYMPK	0.78956	0.991618	-0.0342081
NR4A1	0.630962	0.980867	0.0532119
TRIM2	0.976295	0.999587	-0.00263176
COX5B	0.0543576	0.765903	-0.259903
HSF1	0.194653	0.90203	-0.169308
FABP5	0.301842	0.934494	-0.268158
UBE2K	0.568793	0.976799	0.0500689
TOR1A	0.256303	0.930664	-0.132704
LOC100506558 /// MATN2	0.27979	0.932747	0.153437
ITGAV	0.602503	0.97786	0.0636177
PSMD12	0.515072	0.968642	-0.0802516
GTF2F1	0.994019	0.999587	-0.000823308
CFB	0.374876	0.949507	0.126366
SNX19	0.151731	0.892749	0.216212
MAML1	0.286719	0.932747	-0.142132
SEC24C	0.908221	0.999587	-0.0135255
RAP1A	0.322752	0.939613	0.25468
SPOCK1	0.43428	0.957962	-0.194657
MXI1	0.227383	0.915506	0.458536
UNC119B	0.25729	0.931415	0.208722
ACADS	0.741825	0.984484	-0.0514487
CUX1	0.697854	0.98143	-0.0416143
TRAM2	0.12367	0.872802	-0.188893
CBFB	0.130374	0.876172	0.172398
TCEAL4	0.582889	0.977235	0.101795
AURKAPS1 /// RAB3GAP2	0.928925	0.999587	-0.0100177
SEC24D	0.21632	0.911149	-0.120132
SERPINA3	0.756325	0.987015	-0.0895666
LEPROT	0.498992	0.96854	-0.0797731
NKTR	0.0973135	0.837767	0.179482
ADAM9	0.830722	0.995392	-0.0493648
GNPDA1	0.434313	0.957962	-0.224698
KDM5C	0.61896	0.979693	-0.0777195
TCOF1	0.36809	0.949507	0.123678
KIAA0430	0.0120914	0.586649	0.778109
BAG1	0.958324	0.999587	0.014631
RGS2	0.12207	0.870681	-0.450035
HTT	0.354733	0.945609	0.153233
BASP1	0.851684	0.995989	-0.0359013
MIR7109 /// PISD	0.54735	0.974428	0.133261
KLF10	0.949213	0.999587	-0.0177911
ABCF3	0.649628	0.981221	-0.0623746
LOC101930324 /// NSF	0.0141951	0.620862	0.385541
TCERG1	0.659469	0.981221	0.0789236
NUTF2 /// NUTF2P4	0.893697	0.999587	0.0275889
AP3S2 /// C15orf38-AP3S2	0.42442	0.955689	-0.0971829
SRF	0.420028	0.954383	0.112771
CARS	0.620548	0.979693	0.0487429
COL1A2	0.499217	0.968642	0.1034
TIAL1	0.601138	0.97786	-0.0640005
PRPF31	0.357765	0.946593	-0.112145
IGF2 /// INS-IGF2	0.318151	0.936573	0.0930436
IFI27	0.684597	0.981306	0.296245
USP1	0.881084	0.998744	0.0221448
ERCC5	0.272708	0.932747	0.238425
HSPBP1	0.352771	0.945609	-0.227645
DNAJC7	0.0676266	0.798928	-0.298801
KEAP1	0.369412	0.949507	-0.226648
YIF1A	0.0510276	0.764425	-0.351066
KDSR	0.73903	0.984484	-0.0347252
DHX9	0.6565	0.981221	0.0883332
IGSF3	0.132416	0.877119	-0.282288
ACSL4	0.876767	0.997935	0.0345544
KAT6A	0.615879	0.979693	-0.0541091
MAP2K2	0.323596	0.939613	0.137343
PPP3CA	0.149609	0.890735	0.195208
RXRA	0.417071	0.953818	-0.118799
MPC2	0.431958	0.957348	0.107408
DBI	0.122492	0.870681	-0.426781
PLSCR1	0.439474	0.957962	-0.262726
MYC	0.851104	0.995989	0.0830768
PPP3CB	0.168413	0.900823	0.20146
SLC35B1	0.0110276	0.586649	-0.466168
CYP1B1	0.981681	0.999587	0.00449944
IDS	0.130322	0.876172	0.174386
ST5	0.638195	0.981221	-0.0605986
ERLIN1	0.201444	0.90739	-0.252937
AP3S1	0.51807	0.968642	0.128413
NOTCH2	0.69415	0.981306	0.0374929
DECR1	0.179949	0.901258	0.155432
ZER1	0.240065	0.922163	0.21492
CTSK	0.274635	0.932747	-0.150865
GTF2H1	0.0883517	0.825917	0.264741
ERBB3	0.579209	0.977235	-0.0904184
HDAC5	0.945786	0.999587	0.0113544
PRSS23	0.39472	0.951753	0.171394
LPIN2	0.0646651	0.785925	0.595367
EIF2B2	0.981655	0.999587	-0.00341703
DDX46	0.570782	0.977235	0.173082
MBD3	0.96812	0.999587	0.00566018
PFKFB3	0.523069	0.969456	0.174931
PCOLCE	0.81052	0.99364	0.0332171
PAPD7	0.759465	0.987015	-0.0348706
COPS2	0.134655	0.879445	0.31841
CTNNAL1	0.414136	0.953818	0.24757
CPSF6	0.0514809	0.764425	0.223963
IDH3G	0.627519	0.979973	-0.103242
MPI	0.214123	0.911149	0.306723
HCFC1	0.656567	0.981221	-0.0487914
TMEM147	0.0606955	0.769696	-0.354289
TUBGCP2	0.420697	0.954481	-0.102278
TRIB2	0.776019	0.990529	-0.0558938
DEDD	0.42694	0.956386	-0.0895295
DHRS3	0.730497	0.983448	0.0678309
RANBP1	0.922015	0.999587	0.0139212
MBD2	0.991569	0.999587	0.00112536
AFG3L2	0.259032	0.932058	-0.24266
H2AFV	0.0682687	0.800209	0.257079
FXYD3	0.784575	0.991073	-0.0528407
IKBKAP	0.280764	0.932747	0.126859
ATG9A	0.110096	0.85988	0.399139
CSH1 /// CSHL1 /// GH1	0.678374	0.981306	-0.0252217
PPIE	0.0929803	0.830329	-0.309675
TBCC	0.83692	0.995814	-0.0447459
EDC4	0.063477	0.779485	-0.409559
SLC2A3	0.436761	0.957962	0.172673
DNAJB2	0.777294	0.990529	-0.0780848
MAPRE2	0.0467433	0.738873	0.274064
ACADM	0.857141	0.996292	0.0391432
KIAA0101	0.30975	0.934494	0.148221
TRIM29	0.866814	0.997856	0.0213426
SNRPB2	0.512335	0.968642	-0.171338
SSFA2	0.431341	0.956386	0.155999
SNAP25	0.882144	0.998744	-0.0182066
TNFAIP2	0.3116	0.936019	-0.172078
ATG5	0.529541	0.972308	-0.0809169
PPP2R5D	0.881275	0.998744	-0.0197898
DLG1	0.517966	0.968642	0.0496401
CRMP1	0.518527	0.968642	0.214287
BCL7B	0.0938644	0.8324	-0.446256
MLXIP	0.51364	0.968642	0.0696669
MLH1	0.40053	0.952612	-0.103998
CTCF	0.0438566	0.736483	0.248829
PITPNB	0.25384	0.929459	-0.229063
SPOCK2	0.933781	0.999587	0.0115434
PRSS8	0.983367	0.999587	-0.00457786
SMAD4	0.44649	0.958728	0.0663809
GALE	0.0457383	0.736483	-0.427735
PRPSAP1	0.237334	0.922037	0.171335
MAPK14	0.685222	0.981306	-0.0686767
IRF1	0.0433775	0.736483	-0.389713
DHFR	0.657533	0.981221	0.0530597
FADD	0.84256	0.995989	-0.0524172
CHMP2B	0.146937	0.885264	-0.262887
HMGCR	0.960009	0.999587	-0.00913806
AIMP1	0.749181	0.986155	-0.0434098
GMFB	0.809741	0.993625	0.0302597
PRKCD	0.224004	0.915506	-0.486852
VAMP8	0.183146	0.901258	-0.443325
ARHGEF7	0.177334	0.901258	-0.156234
VAPB	0.80292	0.992421	-0.022317
CRIM1 /// LOC101929500	0.681778	0.981306	0.050047
SYF2	0.966735	0.999587	-0.0133445
GSTM3	0.69298	0.981306	0.0531322
MYLK	0.00791922	0.571587	0.803424
MCRS1	0.382295	0.949507	-0.134901
HSPA13	0.037256	0.708058	0.578541
CHTOP	0.237072	0.922037	-0.179996
TNKS	0.192429	0.901546	0.146515
C14orf1	0.939488	0.999587	0.0124273
ARL2	0.379934	0.949507	-0.222061
SVIL	0.431319	0.956386	-0.129769
SNRPD3	0.751945	0.986576	0.0683472
MARK3	0.0895108	0.827556	0.249729
DLGAP4	0.781502	0.991073	0.0421952
CSNK1G2	0.867831	0.997856	-0.0400356
CRABP2	0.753535	0.986576	-0.0650155
DDX19A /// DDX19B	0.290458	0.932747	0.214478
DDX19A	0.694785	0.981306	-0.0786489
HMGN4	0.782464	0.991073	0.054272
FOXM1	0.0904367	0.828645	0.483599
RANBP9	0.260891	0.932747	0.147598
NFX1	0.495816	0.967088	0.071442
POLR2L	0.609873	0.979366	-0.078056
AK1	0.934787	0.999587	0.0107464
TYMS	0.0494021	0.76002	0.254126
PDK2	0.365156	0.949507	0.251739
SSBP1	0.298023	0.934494	-0.162609
BLOC1S1	0.33733	0.942316	-0.232111
GDE1	0.387137	0.949679	-0.151127
LEPROTL1	0.326562	0.940003	-0.0896531
ENSA	0.0405536	0.726486	0.234204
IRF6	0.415045	0.953818	-0.258767
S100A13	0.951936	0.999587	0.011522
NRIP1	0.219716	0.915506	0.241785
HTATSF1	0.0198794	0.66631	0.238503
ADAM10	0.873807	0.997856	0.0243505
GUSB	0.892335	0.999587	-0.0242123
TLK1	0.507842	0.968642	0.055031
NDST1	0.466665	0.962474	-0.0842545
EPS8	0.700845	0.981742	0.0540919
MED14	0.753477	0.986576	-0.0364782
CTPS1	0.972101	0.999587	0.00480359
SLC30A9	0.250332	0.92717	0.158066
GNAQ	0.664599	0.981306	-0.0687132
MECP2	0.529732	0.972308	0.0677079
PLOD2	0.0597625	0.769696	0.235362
IRF3	0.387885	0.950086	-0.156635
ATXN2	0.879227	0.998664	0.0228561
EAPP	0.557673	0.974428	-0.15143
CABIN1	0.777545	0.990529	-0.0568818
LYN	0.795105	0.991797	-0.0546219
SERPINE1	0.546766	0.974428	0.0493948
APPBP2	0.140178	0.881265	0.122208
DPH1 /// OVCA2	0.503127	0.968642	-0.111384
TOPBP1	0.0202649	0.6702	0.396232
POLR2K	0.592566	0.977235	-0.0996201
RNF103	0.133788	0.879445	-0.276477
ICAM1	0.0331687	0.696485	-0.394851
RANBP3	0.594602	0.977235	0.0713521
ARL3	0.234047	0.921687	-0.166029
TRRAP	0.0650071	0.787249	0.259027
TNFAIP3	0.508088	0.968642	-0.17335
MEN1	0.0393437	0.72529	0.296894
CSDE1	0.0238798	0.682917	0.320436
NRAS	0.878171	0.998641	-0.0232142
TCF3	0.298407	0.934494	0.0947725
RPS19	0.200249	0.90739	-0.215277
KIAA0195 /// MIR6785	0.315511	0.936549	0.104804
LPGAT1	0.923107	0.999587	-0.0159172
APBB1	0.719663	0.982803	0.0755066
MARCH7	0.827732	0.994698	0.0421315
MANF	0.856331	0.996292	-0.0322282
SERTAD2	0.059201	0.769696	0.307669
PEX11B	0.401706	0.952612	0.142074
PSMB10	0.0204586	0.6702	-0.575705
ITPR2	0.165053	0.897875	0.160765
WIPF1	0.168646	0.900823	0.174764
ACTL6A	0.716077	0.982409	0.050961
SLC39A7	0.0365467	0.708058	0.433676
EFNB2	0.317202	0.936549	-0.14402
MAP2K1	0.598869	0.977235	0.0787686
PDXK	0.0856545	0.825917	-0.29399
ATF3	0.0325631	0.696485	-0.47059
DPM1	0.407526	0.953818	-0.211504
LMO7	0.554859	0.974428	0.0729298
SDHB	0.375925	0.949507	-0.102416
FASTK	0.189411	0.901258	-0.160567
RASA1	0.0825158	0.825337	0.208865
GTF2A2	0.0435143	0.736483	-0.288105
NPC1	0.381833	0.949507	0.118392
GTF2E2	0.260531	0.932747	-0.130253
C3orf62 /// MIR4271 /// USP4	0.762042	0.987015	0.0528439
USP4	0.154674	0.89313	-0.165765
RNMT	0.660756	0.981221	0.0436693
AXL	0.277149	0.932747	-0.110027
TNFSF10	0.017088	0.639735	-0.889974
RBM15B	0.704114	0.981799	-0.0650699
SNRPD1	0.203164	0.90739	-0.218259
UBTF	0.267409	0.932747	0.161499
STK17A	0.085331	0.825917	0.205902
OXSR1	0.691129	0.981306	0.0786373
NUDT21	0.278392	0.932747	-0.127055
TMEM63A	0.998508	0.999758	-0.00022156
BMP1	0.742269	0.984484	-0.0530475
TRIM26	0.521492	0.968941	-0.0967795
DUSP11	0.558683	0.974428	0.141595
TOB1	0.970669	0.999587	0.00691869
CCNB2	0.220399	0.915506	0.395466
UMPS	0.417236	0.953818	-0.088245
HIST2H2BE	0.0302782	0.696485	-0.382352
FMOD	0.468566	0.962474	-0.104257
BET1	0.748358	0.985897	-0.0424932
EFNB1	0.930295	0.999587	0.0170731
CKMT1A /// CKMT1B	0.0580845	0.769696	-0.340319
KIAA0391 /// PSMA6	0.498997	0.96854	-0.113658
KIAA0391	0.58298	0.977235	0.081706
CAD	0.118855	0.868283	0.336674
PTPN1	0.936807	0.999587	-0.00702492
CDC16	0.670755	0.981306	0.0792671
IGFBP2	0.267093	0.932747	0.262045
TES	0.0541809	0.765903	0.264671
GFPT1	0.846893	0.995989	-0.0379644
FOXO1	0.588201	0.977235	-0.098607
POLR2A	0.375651	0.949507	0.141476
LIG1	0.116072	0.864408	-0.197815
IFNGR1	0.057654	0.769696	-0.381909
LTBP1	0.0207076	0.670608	0.443934
MIR4680 /// PDCD4	0.632636	0.980867	0.0845799
PKIG	0.853857	0.995989	0.0269774
LOC101927705 /// P4HA2	0.394982	0.951753	-0.130273
TRIP10	0.222761	0.915506	0.136807
EBP	0.372207	0.949507	-0.139824
LSM4	0.0335314	0.696485	-0.254428
PHKB	0.170586	0.901258	0.183727
ABHD14A-ACY1 /// ACY1	0.445579	0.958728	0.152272
PRKACB	0.0552413	0.765903	0.296178
PIK3R3	0.626847	0.979973	-0.083612
SLC20A2	0.122546	0.870681	-0.350174
USP8	0.330386	0.941101	0.133577
ITM2A	0.17656	0.901258	0.370652
GBP2	0.0843139	0.825917	-0.308391
WRB	0.0378486	0.711993	0.501928
TFIP11	0.474441	0.963208	0.11336
SLC7A8	0.291053	0.932747	-0.1277
PSMD6	0.335656	0.942316	-0.137868
R3HDM1	0.183406	0.901258	0.147848
GPC1	0.897554	0.999587	0.0165992
NELFB	0.490405	0.966823	-0.172963
RFXANK	0.0724451	0.800209	-0.244418
AKAP2 /// PALM2-AKAP2	0.964395	0.999587	0.00732694
SYNE2	0.675667	0.981306	-0.0788614
ROCK2	0.996468	0.999758	0.00091456
CASP3	0.974036	0.999587	-0.0061479
STIM1	0.422657	0.954951	-0.132391
FBN1	0.879223	0.998664	0.0150347
ACP2	0.411457	0.953818	-0.160663
FOSB	0.0781877	0.812227	-0.480665
CCNG2	0.950719	0.999587	-0.00762938
PIEZO1	0.291625	0.932747	-0.257359
HMGCL	0.57228	0.977235	-0.0778023
SFSWAP	0.660697	0.981221	0.0603673
DNTTIP2	0.567558	0.976138	-0.112005
SHOC2	0.90107	0.999587	-0.0217739
ZMYM2	0.739496	0.984484	0.0434
UBE2S	0.18693	0.901258	-0.445239
OXCT1	0.732341	0.983448	-0.102868
INPP5K	0.398899	0.951753	0.117047
NNT	0.825998	0.994411	-0.0382441
NDUFA7	0.89411	0.999587	0.0403364
STK39	0.00131067	0.484285	0.572564
MAPKAPK3	0.019197	0.6581	-0.362597
PLCG1	0.542242	0.973532	0.0818039
CLDN7	0.22346	0.915506	-0.134316
PPP6R2	0.88928	0.999587	-0.0191931
LPCAT3	0.39101	0.95149	0.143813
INPP1	0.620086	0.979693	-0.0698556
TRIOBP	0.677816	0.981306	-0.0578958
SYNPO	0.668777	0.981306	0.105999
SACM1L	0.833064	0.995392	-0.0530464
SEC24B	0.220283	0.915506	0.19963
CLPP	0.985658	0.999587	-0.00787109
SLC1A3	0.0712177	0.800209	0.498766
PRKACA	0.346888	0.945609	0.174007
DHPS	0.239058	0.922163	-0.18598
ITGB2	0.783557	0.991073	-0.0551332
ABCC1	0.853182	0.995989	-0.0231454
DBN1	0.0487635	0.756645	0.438239
TOM1	0.402395	0.953061	-0.179058
WBP1L	0.849126	0.995989	0.0315485
INTS3	0.881158	0.998744	0.0216981
DRG1	0.805581	0.99301	0.048252
STAMBP	0.648458	0.981221	0.0763369
GAA	0.417261	0.953818	0.165103
TARBP1	0.324973	0.940003	0.249673
HEXIM1	0.00827518	0.572476	0.691581
SS18	0.139469	0.88059	-0.145888
TCEB3	0.670606	0.981306	-0.0483992
AHR	0.706237	0.981799	0.0687648
LPP	0.760525	0.987015	0.0417982
TCEB1	0.485025	0.966617	-0.1087
SLC25A4	0.455903	0.961946	-0.098103
SPINT1	0.681157	0.981306	0.0592576
VAMP7	0.776394	0.990529	0.0559636
SLC37A4	0.276504	0.932747	-0.13307
GPX2	0.848661	0.995989	-0.0594892
GCC2	0.112074	0.85988	0.252171
SERPINA1	0.199269	0.906999	-0.198176
AGT	0.894469	0.999587	0.0345834
TXNL4A	0.685737	0.981306	-0.0573278
TRAFD1	0.194885	0.90232	-0.233774
FUCA1	0.429604	0.956386	0.173974
NDUFB7	0.706295	0.981799	-0.061298
TAF15	0.192696	0.901809	-0.248107
OGFR	0.00944007	0.577064	-0.346542
DNAJB9	0.618495	0.979693	-0.070676
RALBP1	0.045506	0.736483	0.397589
PIGC	0.942171	0.999587	-0.0102193
PCK2	0.266179	0.932747	-0.15902
GRK6	0.988458	0.999587	-0.00223726
ABCD3	0.212079	0.911149	0.292698
AAGAB	0.0865867	0.825917	0.204004
RYK	0.295795	0.934494	0.142536
HPRT1	0.947958	0.999587	-0.0111264
MIR6787 /// SLC16A3	0.108374	0.859045	-0.372426
CNPY2	0.183355	0.901258	-0.254551
U2AF1	0.725125	0.983171	-0.162316
CXCL8	0.136546	0.88059	-0.577509
DENND4B	0.651998	0.981221	0.0963524
MIR6883 /// PER1	0.655279	0.981221	0.0746638
FAH	0.501143	0.968642	0.122091
SP100	0.900722	0.999587	-0.0175926
DNAJB12	0.683245	0.981306	-0.039702
POP4	0.144024	0.885264	-0.258946
OAS1	0.00102585	0.484285	-1.00195
CDC20	0.909858	0.999587	-0.0298069
TRAF4	0.0333633	0.696485	0.448936
ATP6V1C1	0.982343	0.999587	0.00252788
PBX2	0.695778	0.981306	0.051746
CD93	0.809405	0.993625	0.0365744
CYTH1	0.450522	0.960336	-0.12177
NOL7	0.86462	0.997846	0.0249335
PPP2R1B	0.949447	0.999587	-0.00453198
DDIT4	0.473021	0.963097	0.261727
ANPEP	0.171076	0.901258	0.304873
MAP7	0.623031	0.979973	0.0547431
NIT1	0.874143	0.997856	0.0318189
CDC23	0.805628	0.99301	-0.0328024
UNC13B	0.558836	0.974428	0.135366
EPHB4	0.163718	0.897818	-0.191626
SIRPA	0.274355	0.932747	-0.167433
SDC3	0.133106	0.877899	0.291778
SRSF3	0.169189	0.901258	-0.15821
E2F1	0.0459927	0.736483	0.34529
NUP88	0.107834	0.857735	0.213171
CTSS	0.0465472	0.738801	-0.374113
LSM5	0.82249	0.994411	0.0269779
NBN	0.338426	0.942316	-0.155359
WFS1	0.0281439	0.696485	-0.307852
EPM2AIP1	0.987229	0.999587	-0.00333086
CD97	0.337432	0.942316	-0.372382
MSH6	0.9857	0.999587	0.00263286
ADM	0.668845	0.981306	-0.0941872
ARHGEF11	0.930217	0.999587	-0.0105999
FAM20B	0.00519426	0.537838	0.313132
S100A8	0.053473	0.765903	0.387812
HSPE1-MOB4 /// MOB4	0.824455	0.994411	-0.0452495
MOB4	0.30944	0.934494	-0.202034
ANK2	0.831077	0.995392	0.03505
GCLC	0.206693	0.907747	0.507433
PLAGL2	0.25173	0.927724	-0.120194
NBAS	0.665479	0.981306	0.11641
PIN1	0.235721	0.922037	0.32412
PHF1	0.368672	0.949507	-0.160589
DDT /// DDTL	0.76944	0.988508	0.0709558
SUCLA2	0.287343	0.932747	0.142913
BIN1	0.110291	0.85988	-0.171589
YES1	0.25366	0.929314	0.157787
HK2	0.0911491	0.829406	0.430886
SOX9	0.9416	0.999587	0.0107105
RRP7A	0.816375	0.993991	-0.0497775
RRP7A /// RRP7B	0.344655	0.945609	-0.0985877
ZMPSTE24	0.628067	0.979973	-0.0659613
WNK1	0.00121249	0.484285	0.595314
NDUFV2	0.958364	0.999587	0.00949064
ETFB	0.555103	0.974428	0.140014
NAGA	0.00415656	0.537838	-0.439218
FPGS	0.180925	0.901258	-0.208279
BTBD3	0.643082	0.981221	-0.0703647
GYPC	0.507544	0.968642	0.221313
IL1R1	0.42305	0.954951	0.0944846
FHL2	0.0995792	0.842637	0.399324
CRYZ	0.465233	0.962206	0.119261
STK38	0.721606	0.983171	0.0292863
ADAM12	0.524058	0.969827	-0.0741976
C1QB	0.497925	0.968478	-0.264437
UBE2C	0.161557	0.894853	0.441987
ARFGEF1	0.857958	0.996292	0.0198495
HCLS1	0.274694	0.932747	-0.171758
PTPN9	0.858313	0.996292	-0.0396392
MUT	0.255763	0.930431	0.151751
ARMC2-AS1 /// ATP5J2	0.140911	0.881265	-0.389558
KIF13B	0.84605	0.995989	0.0318637
RFX5	0.343574	0.945458	-0.104089
CAPN6	0.346396	0.945609	0.10105
GSTA4	0.528278	0.971444	0.12791
DYRK2	0.47366	0.963097	0.0681711
FAM13A	0.872823	0.997856	-0.0217183
MPP1	0.549204	0.974428	0.252352
RHOBTB3	0.368494	0.949507	-0.112866
CREBZF	0.721208	0.983171	0.0274931
SIAH1	0.448945	0.959071	0.0983328
ACOT1 /// ACOT2	0.72637	0.983171	-0.0560286
HLTF	0.466714	0.962474	0.113844
BAG5	0.0248942	0.682917	0.239982
ARNT2	0.141103	0.881339	-0.166732
TRAF3IP2	0.352652	0.945609	0.125813
RGS1	0.4879	0.966823	-0.106449
PYGL	0.599854	0.977235	0.108224
STARD3	0.21072	0.911149	-0.231672
C7	0.613032	0.979693	-0.0497847
ILVBL	0.156195	0.89313	-0.135226
POLD4	0.690621	0.981306	-0.141938
LOXL2	0.909262	0.999587	0.0148044
STMN2	0.968613	0.999587	-0.00412562
AMOTL2	0.258463	0.931869	0.162827
MEF2D	0.929645	0.999587	-0.0134088
LTBR	0.744442	0.985042	-0.0894627
INPP5A	0.188801	0.901258	-0.197983
LYPLA1	0.273836	0.932747	0.187643
TXNDC9	0.595355	0.977235	0.111685
BCAM	0.0689638	0.800209	0.442566
STAT5A	0.5989	0.977235	-0.12719
IMPA1	0.981601	0.999587	0.00629985
RPL23A	0.775024	0.990372	0.0630562
ECD	0.442433	0.958522	-0.139963
SGSM3	0.875406	0.99793	0.0185555
SSX2IP	0.35802	0.946711	-0.0896925
RABGAP1L	0.0593433	0.769696	0.266834
SLPI	0.289896	0.932747	0.19811
RNASEH2A	0.199235	0.906999	0.233021
NOP16	0.832467	0.995392	0.0252539
C5orf15	0.146384	0.885264	0.232876
NAA10	0.876476	0.997935	0.0439287
ZBTB5	0.54585	0.974428	0.103668
MVD	0.0555794	0.765903	0.411696
CYBA	0.774587	0.990372	-0.0935202
PTPRN2	0.488882	0.966823	0.0649038
UROS	0.87402	0.997856	0.024912
FH	0.905517	0.999587	-0.0130684
RPL27A /// SNORA45A	0.629292	0.979973	0.0565054
PIAS3	0.273265	0.932747	-0.194657
MTSS1	0.826852	0.994411	0.0220249
PTPRK	0.768101	0.988164	0.0507926
NDUFS1	0.113872	0.85988	0.178688
HMBS	0.125907	0.872802	0.573757
ZBED1	0.293579	0.933722	-0.136872
CHSY1	0.693332	0.981306	-0.0784276
NINJ1	0.029608	0.696485	-0.705201
TIMELESS	0.368302	0.949507	-0.1233
STK10	0.878191	0.998641	-0.0367226
TTC37	0.127771	0.872802	0.198265
TP53BP1	0.216314	0.911149	0.178374
BAHD1	0.150501	0.892422	-0.223103
C2	0.198871	0.906999	0.283566
BCAS2	0.208861	0.910566	-0.194432
TCTA	0.868143	0.997856	-0.0247927
ARHGEF1 /// LOC100505585	0.428515	0.956386	-0.0745963
PRDM2	0.45581	0.961946	0.0660577
PAPSS2	0.52705	0.971373	0.107476
MDC1	0.372578	0.949507	0.125998
PPM1F	0.0218904	0.673456	-0.312555
FOXK2	0.41766	0.953818	-0.249005
CAV1	0.664863	0.981306	0.0868031
CHST15	0.680147	0.981306	-0.0853255
PDHX	0.872045	0.997856	-0.0217299
KLHL21	0.00779996	0.571587	0.712222
SV2A	0.21636	0.911149	0.262546
SEMA3B	0.14738	0.885264	0.324868
MIR6872 /// SEMA3B	0.456397	0.961946	0.138668
MYO1E	0.607032	0.978091	-0.0820652
COG2	0.620419	0.979693	0.0646147
ANXA8 /// ANXA8L1	0.151616	0.892749	-0.240612
SMAD2	0.127076	0.872802	0.153243
CUL2	0.695616	0.981306	-0.0589146
BAZ2B	0.32943	0.940933	-0.159724
CTNNBIP1	0.0605493	0.769696	-0.364035
BMS1	0.537721	0.973298	0.116919
THBS2	0.818634	0.993991	-0.0471866
TGFB1	0.369502	0.949507	0.164776
KIF2A	0.706096	0.981799	-0.0559489
FBLN5	0.567657	0.976138	0.130631
HTRA2	0.323164	0.939613	0.19946
SDF2	0.0829391	0.825337	-0.293413
FUBP1	0.792992	0.991684	-0.0282446
TIMM44	0.96726	0.999587	0.00791336
MAD2L1BP	0.0324131	0.696485	-0.302831
MTIF2	0.709733	0.981799	0.0971228
RAPGEF2	0.00861266	0.573018	0.453591
CDYL	0.71407	0.981799	0.0395379
MGAT2	0.946279	0.999587	-0.00789319
PRPF19	0.307294	0.934494	0.342485
CSF1R	0.79521	0.991797	-0.0530207
DNM1L	0.475017	0.963635	0.0918887
VPS41	0.74168	0.984484	-0.0335423
RPS2 /// SNORA64	0.934287	0.999587	0.0167382
GPRC5A	0.361071	0.949338	0.101545
UBE2M	0.319372	0.938054	-0.427066
PTK2B	0.288191	0.932747	-0.217724
MIR943 /// NELFA	0.644739	0.981221	-0.0722673
EEF1D	0.302326	0.934494	0.128825
SSSCA1	0.266457	0.932747	0.40498
FECH	0.110877	0.85988	0.732735
PAN2	0.686716	0.981306	-0.0731961
PCSK7	0.656634	0.981221	-0.0835617
CCDC86	0.134699	0.879445	-0.332912
TP53BP2	0.0277518	0.696485	0.330284
TRAPPC12	0.00186236	0.526836	0.948155
SLC11A2	0.24234	0.92286	-0.132037
IMPA2	0.988455	0.999587	-0.00299257
SPTLC2	0.0455673	0.736483	-0.442757
KIF5C	0.820707	0.994095	-0.026883
PDGFRA	0.0779091	0.812227	0.152184
RB1	0.851569	0.995989	-0.028024
SEC61B	0.202235	0.90739	-0.276423
PICALM	0.0346812	0.699578	-0.265805
TBP	0.270403	0.932747	0.179717
RABAC1	0.0455709	0.736483	-0.342842
WTAP	0.322059	0.93912	-0.113688
HAT1	0.754241	0.986742	-0.0787096
DAPK1	0.276239	0.932747	0.15415
BCL6	0.406139	0.953818	-0.148749
AP3B1	0.618898	0.979693	0.0489573
KIAA0040	0.104052	0.845892	-0.342928
SPAG5	0.213694	0.911149	0.193224
GABBR1	0.297862	0.934494	-0.260532
TRIM14	0.565238	0.975902	-0.0779288
PVRL2	0.516364	0.968642	-0.084243
RABEPK	0.0513047	0.764425	-0.285821
MAP1A	0.361228	0.949338	-0.158216
MRPL40	0.462664	0.961946	-0.226922
IFIT1	0.00570449	0.551603	-1.81515
PAK4	0.338109	0.942316	0.111672
SETDB1	0.410647	0.953818	-0.123929
AKAP11	0.632549	0.980867	-0.049647
GLS	0.610594	0.979366	-0.048383
RNF8	0.890738	0.999587	0.012767
KATNB1	0.276185	0.932747	-0.156639
SLC33A1	0.835948	0.995814	-0.0280767
CFDP1	0.490023	0.966823	0.0851742
TIMP2	0.550329	0.974428	-0.235686
ATF6B	0.612009	0.979693	-0.0627381
RGP1	0.616188	0.979693	0.138291
RRP8	0.0618215	0.770232	-0.279178
FXR2	0.0431217	0.736483	0.267155
C16orf62	0.87515	0.997856	0.0204912
ARFRP1	0.0893947	0.827556	-0.213045
RHOG	0.443193	0.958728	-0.129548
TFAM	0.143991	0.885264	0.196082
GATM	0.281463	0.932747	-0.151681
GALT	0.663448	0.981306	-0.0595788
ALDH1A3	0.616575	0.979693	-0.038258
SRPK2	0.055336	0.765903	0.287096
SMARCD1	0.642446	0.981221	0.0862862
FBN2	0.864525	0.997846	0.0159105
RASSF2	0.656677	0.981221	-0.0584855
S100A4	0.0410775	0.72856	-0.535996
DOCK1	0.662067	0.981306	0.082879
B3GNT1	0.706801	0.981799	-0.0922918
MIR4691 /// MIR7113 /// NDUFS8	0.508669	0.968642	-0.114088
ABCB6	0.462451	0.961946	0.103527
NUP98	0.870406	0.997856	0.021934
ABCC4	0.0188138	0.6581	0.526518
C1orf123	0.386772	0.949679	0.264552
CDK9	0.608101	0.978826	0.0965835
MTRR	0.775065	0.990372	-0.0602475
PMM2	0.104359	0.845892	-0.412737
KRR1	0.44826	0.958859	0.135523
KDM4A	0.839325	0.995942	0.0456297
FAM53B	0.273771	0.932747	-0.153264
MTFR1	0.488694	0.966823	0.0809691
RFC5	0.697042	0.981306	0.0594451
MTMR2	0.196525	0.904028	0.168553
CDK1	0.947477	0.999587	0.0100433
MYO6	0.725976	0.983171	0.0269397
ST3GAL5	0.736256	0.983683	0.0474237
MAPK9	0.356773	0.946355	0.177587
APRT	0.139308	0.88059	-0.36118
TLE1	0.521387	0.968941	0.0778162
RABEP1	0.957836	0.999587	-0.0045397
RFK	0.135633	0.88059	-0.158239
TSPAN31	0.586605	0.977235	0.0808507
PAFAH1B3	0.925141	0.999587	0.0251217
CLK2	0.264326	0.932747	0.277344
DVL1	0.802341	0.992421	-0.033699
ATXN1	0.113378	0.85988	0.291613
IL4R	0.750361	0.986576	-0.0628274
UPP1	0.511345	0.968642	-0.239411
THOP1	0.418487	0.953818	-0.191325
LGALS9	0.0244233	0.682917	-0.598907
NOTCH3	0.249287	0.926344	0.15648
CNOT3	0.546314	0.974428	0.104653
FCGBP	0.599455	0.977235	0.0952062
UVRAG	0.984492	0.999587	0.00205438
PDLIM5	0.693206	0.981306	-0.0449955
PEX5	0.384565	0.949507	0.149141
LINC00094	0.488959	0.966823	0.119183
NPRL2	0.25503	0.929538	0.264341
ZNF24	0.0689273	0.800209	-0.172822
EZH1	0.467075	0.962474	0.113764
SCAF8	0.882614	0.998744	-0.0263727
CDK2AP2	0.74394	0.984755	-0.0786049
PPIP5K2	0.0190743	0.6581	0.374328
TLN1	0.488823	0.966823	0.176035
FBXO11	0.39466	0.951753	0.111771
CDH3	0.441123	0.958522	0.0688994
C11orf49	0.325219	0.940003	0.206348
DRAP1	0.0605773	0.769696	-0.393088
HDDC2	0.190968	0.901258	-0.160371
DCTN6	0.050403	0.764394	-0.318474
FAM50A	0.0332177	0.696485	-0.36214
ARHGEF9	0.751019	0.986576	0.0322978
MAP2K4	0.38419	0.949507	0.127737
DRG2	0.643878	0.981221	-0.112386
NSMAF	0.573294	0.977235	0.0727075
DTYMK	0.990984	0.999587	-0.00291349
UNC119	0.394093	0.951753	0.261473
TUSC2	0.0425974	0.736194	-0.287862
F8A1 /// F8A2 /// F8A3	0.166166	0.897907	0.25641
IRF2	0.408948	0.953818	0.231816
LMNB1	0.221102	0.915506	-0.230594
DFFA	0.170778	0.901258	-0.189735
PHF21A	0.464437	0.96205	0.151541
EDEM1	0.604645	0.97786	0.14048
SAFB2	0.841584	0.995989	-0.0380581
GBE1	0.589401	0.977235	0.0951178
HS2ST1	0.210694	0.911149	0.142302
RNF44	0.366569	0.949507	0.181532
LAD1	0.572101	0.977235	0.0812344
KIAA0355	0.804084	0.992619	0.0369419
NPRL3	0.193116	0.90203	0.354448
HLA-DQA1	0.488644	0.966823	0.322041
CNOT4	0.921978	0.999587	-0.00942991
VPS11	0.69542	0.981306	0.044056
LMAN1	0.679228	0.981306	-0.0342886
ATP1A2	0.909698	0.999587	0.011137
JARID2	0.906483	0.999587	-0.0164694
AP1S2	0.842076	0.995989	-0.0230949
DMTF1	0.520681	0.968642	-0.138199
DCK	0.0653146	0.787713	0.631966
DYNLT3	0.363865	0.949507	-0.120443
BAMBI	0.818568	0.993991	0.0466843
F13A1	0.122794	0.870705	0.448236
SLC35A1	0.683317	0.981306	-0.0934052
GNL1	0.739355	0.984484	0.0520726
HPS1	0.0296401	0.696485	0.652447
STXBP3	0.427952	0.956386	0.138494
ARF6	0.811786	0.993722	0.0516578
TGIF1	0.145721	0.885264	0.211818
GTPBP6	0.307836	0.934494	0.169706
NCK2	0.954388	0.999587	-0.00897957
SNRPE	0.592698	0.977235	-0.119995
PSD4	0.440493	0.958504	-0.200252
ZNF148	0.577146	0.977235	0.132091
SH2B3	0.438736	0.957962	-0.133864
ADNP2	0.675056	0.981306	0.0708292
CAV2	0.411362	0.953818	0.116907
[truncated: 11,516 more rows]
