# Supplementary material for: Comparative transcriptomic analysis reveals translationally relevant processes in mouse models of malaria
Source: eLife. 2022 Jan 10;11:e70763. doi: 10.7554/eLife.70763 (PMC8747512; doi:10.7554/eLife.70763)
Supplement: Supplementary file 4. [file elife-70763-supp4.xlsx]

## Sheet: Key
Supplementary File 4 Idaghdour et al 2012 Differential Expression Analysis without cell type adjustment
Table Column Names Key
Description: The results of the differential expression Analysis of the Idaghdour et al., 2012 microarray dataset. This analysis did not include adjustment for the different proportiond of the immune cell types.
Symbol	Gene Symbols
P.value	p-value
adj.P.Val	false discovery rate corrected p-value
logFC	log fold change
AveExpr	average expression
t	t-statistic
B	B-statistic
Entrez_Gene_ID	entrez gene id
Probe_Id	probe id
Tab Names Key
Healthy	Healthy
UM	Uncomplicated Malaria

## Sheet: UM-Healthy
Symbol	logFC	AveExpr	t	P.Value	adj.P.Val	B	Entrez_Gene_ID	Probe_Id
FCER1A	-2.37961	8.69533	-14.2082	1.43733e-29	2.82709e-25	56.2363	2205	ILMN_1688423
C1QB	3.3251	9.28397	14.1708	1.80449e-29	2.82709e-25	56.0158	713	ILMN_1796409
ID3	-1.4694	9.02166	-11.8631	2.57749e-23	2.6921e-19	42.2499	3399	ILMN_1732296
LAG3	2.64345	10.0574	11.6391	1.02458e-22	8.02603e-19	40.9072	3902	ILMN_1813338
LOC653079	-1.25592	11.2507	-11.5662	1.60578e-22	1.00631e-18	40.4699	653079	ILMN_3215954
HVCN1	-1.12441	8.9212	-11.4864	2.62431e-22	1.27217e-18	39.9919	84329	ILMN_1815168
PLEKHA1	-0.94892	8.32075	-11.4735	2.84203e-22	1.27217e-18	39.9143	59338	ILMN_1662839
RSL1D1	-0.781922	10.1621	-11.2258	1.30427e-21	5.1085e-18	38.4312	26156	ILMN_1723729
MMP9	3.29829	11.1921	11.0914	2.97919e-21	9.6429e-18	37.6271	4318	ILMN_1796316
LOC729742	-0.977635	12.0005	-11.0861	3.07746e-21	9.6429e-18	37.5955	729742	ILMN_3225211
RPL21	-1.22717	12.4526	-11.0447	3.96932e-21	1.13068e-17	37.3478	6144	ILMN_2290808
LOC650850	5.19289	10.1108	10.9411	7.49676e-21	1.95753e-17	36.7287	650850	ILMN_1804217
LOC389156	-1.4032	10.4424	-10.791	1.88122e-20	4.53431e-17	35.8329	389156	ILMN_3210171
C16orf57	1.13083	9.92362	10.6893	3.50757e-20	7.85044e-17	35.2263	79650	ILMN_1765880
EBI3	1.64338	7.87674	10.6613	4.16182e-20	8.69377e-17	35.0598	10148	ILMN_1802653
FGR	0.931041	12.193	10.5957	6.21713e-20	1.17079e-16	34.6689	2268	ILMN_1795158
CTSL1	1.83129	9.40846	10.5922	6.35203e-20	1.17079e-16	34.648	1514	ILMN_1694757
LOC100132795	-0.852243	12.191	-10.4956	1.14566e-19	1.99435e-16	34.0737	100132795	ILMN_3201986
RNF144	-0.934313	8.38352	-10.4322	1.68718e-19	2.60756e-16	33.6968	9781	ILMN_1777660
C1QC	2.01359	8.09921	10.4313	1.69633e-19	2.60756e-16	33.6915	714	ILMN_1785902
PID1	-0.745568	7.54763	-10.4264	1.74758e-19	2.60756e-16	33.6625	55022	ILMN_1671891
SMPDL3A	1.49939	8.18465	10.316	3.42645e-19	4.8802e-16	33.0068	10924	ILMN_1796349
ELMO2	0.707175	8.74071	10.2893	4.03154e-19	5.49236e-16	32.8485	63916	ILMN_1778168
FCGBP	-0.874238	7.49796	-10.2077	6.62115e-19	8.64447e-16	32.3653	8857	ILMN_1700156
CTSD	1.13486	10.1218	10.1954	7.13416e-19	8.94167e-16	32.2926	1509	ILMN_1674038
KLHL22	-0.783724	9.15361	-10.1816	7.75911e-19	9.35092e-16	32.2109	84861	ILMN_1705390
GYG1	1.49471	10.7822	10.1375	1.01457e-18	1.17743e-15	31.9497	2992	ILMN_2230862
SPPL2A	0.721331	9.74077	10.1113	1.18967e-18	1.29363e-15	31.7946	84888	ILMN_1734229
DRAM1	1.02183	8.74168	10.1102	1.19727e-18	1.29363e-15	31.7884	55332	ILMN_1669376
ADCY3	1.22731	9.1964	10.098	1.28975e-18	1.3471e-15	31.716	109	ILMN_1676893
LOC100133875	2.24522	9.77106	10.0547	1.67629e-18	1.69435e-15	31.4607	100133875	ILMN_3237878
CHMP7	-0.685156	8.01882	-10.0436	1.79313e-18	1.75581e-15	31.3951	91782	ILMN_1795933
FAM102A	-0.936969	8.23695	-10.0302	1.94529e-18	1.79417e-15	31.3157	399665	ILMN_1745112
LOC100129685	-1.44243	9.595	-10.0258	1.99807e-18	1.79417e-15	31.2897	100129685	ILMN_3182762
DHRS3	-0.849044	8.15382	-10.0253	2.00408e-18	1.79417e-15	31.2867	9249	ILMN_1752478
PAFAH2	-0.844579	8.05882	-9.99822	2.36134e-18	2.05529e-15	31.127	5051	ILMN_1682919
MIR1978	-1.44771	12.4374	-9.97848	2.66118e-18	2.25366e-15	31.0106	100302173	ILMN_3310491
CACNA2D3	-0.648349	6.91239	-9.95671	3.03619e-18	2.48547e-15	30.8822	55799	ILMN_1754076
ICAM2	-0.771191	10.8628	-9.95362	3.09356e-18	2.48547e-15	30.864	3384	ILMN_1786823
MIAT	1.14057	8.22007	9.84147	6.09489e-18	4.77443e-15	30.2035	440823	ILMN_1864900
MTHFD2	0.889533	8.63928	9.82301	6.81393e-18	5.20751e-15	30.0949	10797	ILMN_1674706
LY9	-0.665829	7.81245	-9.76922	9.42688e-18	6.89108e-15	29.7788	4063	ILMN_1731928
C21orf7	-1.61821	10.4454	-9.7687	9.4567e-18	6.89108e-15	29.7758	56911	ILMN_1699071
REPIN1	-0.579298	8.80387	-9.76434	9.70845e-18	6.91374e-15	29.7502	29803	ILMN_1671725
LOC727865	-0.905224	10.8695	-9.74185	1.11186e-17	7.74197e-15	29.6181	727865	ILMN_3199737
LOC645688	-0.826522	11.489	-9.72557	1.22651e-17	8.35464e-15	29.5225	645688	ILMN_1772888
HK3	1.67771	10.2476	9.68307	1.58427e-17	1.03791e-14	29.2733	3101	ILMN_1670302
IRAK3	1.49498	9.05894	9.67975	1.61626e-17	1.03791e-14	29.2538	11213	ILMN_1661695
LOC100131205	-0.989621	11.3402	-9.67905	1.62309e-17	1.03791e-14	29.2497	100131205	ILMN_3214532
KLRB1	-1.42822	10.8702	-9.67381	1.67511e-17	1.04976e-14	29.219	3820	ILMN_2079655
LOC648771	-0.721778	12.3164	-9.61146	2.43743e-17	1.47694e-14	28.8537	648771	ILMN_3281563
LY86	-1.0065	9.68945	-9.61053	2.45104e-17	1.47694e-14	28.8483	9450	ILMN_1807825
AP1S2	-0.780649	11.0844	-9.58089	2.92894e-17	1.73161e-14	28.6749	8905	ILMN_1766411
BEND5	-0.840251	7.86974	-9.54834	3.56105e-17	2.06633e-14	28.4846	79656	ILMN_3237448
LOC646942	-0.695043	11.6898	-9.47285	5.60021e-17	3.19049e-14	28.0437	646942	ILMN_3200299
LOC440055	-0.911592	12.7861	-9.45972	6.05838e-17	3.38988e-14	27.9671	440055	ILMN_1700316
STOM	1.30815	11.1013	9.45189	6.34916e-17	3.49026e-14	27.9215	2040	ILMN_1696419
MXD3	0.693208	7.92496	9.44645	6.5593e-17	3.54361e-14	27.8898	83463	ILMN_1711904
SLC41A3	-0.73048	8.12201	-9.42518	7.44996e-17	3.95656e-14	27.7658	54946	ILMN_1739885
PRAGMIN	-1.10414	9.87388	-9.40584	8.36389e-17	4.3679e-14	27.6531	157285	ILMN_3240222
LILRA6	1.36182	8.55348	9.39368	8.99487e-17	4.62041e-14	27.5823	79168	ILMN_1651404
MTF1	1.09699	9.11976	9.36064	1.09587e-16	5.47762e-14	27.39	4520	ILMN_1763828
FCER1G	1.14318	12.6558	9.35981	1.10133e-16	5.47762e-14	27.3852	2207	ILMN_2123743
NMT2	-0.646651	7.6471	-9.31163	1.4684e-16	7.18921e-14	27.1051	9397	ILMN_1656378
LOC387825	-0.930643	9.15065	-9.29883	1.5849e-16	7.64019e-14	27.0307	387825	ILMN_3214087
MEF2C	-0.823497	7.49954	-9.28929	1.67769e-16	7.96497e-14	26.9753	4208	ILMN_1742544
RPL13L	-1.0396	9.20925	-9.28346	1.73705e-16	8.12367e-14	26.9415	283345	ILMN_1740181
SBNO2	1.26162	9.5096	9.27107	1.87026e-16	8.61803e-14	26.8695	22904	ILMN_1808811
TOMM20	-0.731214	9.27519	-9.26215	1.97235e-16	8.95674e-14	26.8178	9804	ILMN_1679796
LOC649447	-0.706883	12.2073	-9.25698	2.03413e-16	9.10534e-14	26.7878	649447	ILMN_1811063
LOC644511	-0.84123	12.4034	-9.23978	2.25356e-16	9.9455e-14	26.688	644511	ILMN_1789809
LOC647285	-0.94991	11.1081	-9.19314	2.97459e-16	1.29452e-13	26.4177	647285	ILMN_3289100
C17orf70	-0.747173	9.66959	-9.18993	3.03184e-16	1.30137e-13	26.3992	80233	ILMN_1711823
C1QA	1.27356	7.88545	9.18296	3.16025e-16	1.33815e-13	26.3588	712	ILMN_1737918
LOC730316	-0.650152	10.6172	-9.17418	3.32947e-16	1.39101e-13	26.308	730316	ILMN_1662130
EPHA4	-0.549679	7.6873	-9.14281	4.01161e-16	1.65395e-13	26.1266	2043	ILMN_1672022
GRAP	-0.598871	8.38235	-9.1181	4.64554e-16	1.89043e-13	25.9837	10750	ILMN_1656472
C16orf7	1.14165	8.79726	9.08851	5.53699e-16	2.22431e-13	25.8128	9605	ILMN_1693630
LOC728820	-1.01036	10.8185	-9.08531	5.64318e-16	2.22481e-13	25.7943	728820	ILMN_3226291
OBFC2A	0.944287	9.65686	9.08113	5.78495e-16	2.22481e-13	25.7702	64859	ILMN_1785852
RPA2	-0.505351	10.5281	-9.08043	5.80894e-16	2.22481e-13	25.7662	6118	ILMN_1753582
KIF5B	0.589087	8.01681	9.08004	5.82225e-16	2.22481e-13	25.7639	3799	ILMN_1788160
YPEL1	-0.767777	7.87216	-9.06632	6.31551e-16	2.38422e-13	25.6848	29799	ILMN_1795338
B4GALT5	1.46134	11.0855	9.03538	7.58584e-16	2.8297e-13	25.5063	9334	ILMN_1685824
BCL11A	-0.788014	8.81903	-9.03226	7.72746e-16	2.84861e-13	25.4883	53335	ILMN_1659800
LRRN3	-1.20279	8.13863	-9.02528	8.05315e-16	2.90296e-13	25.4481	54674	ILMN_1773650
GLA	0.682939	9.70256	9.02513	8.06018e-16	2.90296e-13	25.4473	2717	ILMN_1766637
RPL26	-0.824372	12.183	-9.01156	8.73437e-16	3.11003e-13	25.3691	6154	ILMN_1731546
EIF3D	-0.597774	11.041	-9.00801	8.91965e-16	3.14032e-13	25.3487	8664	ILMN_1739847
YWHAH	0.64331	11.6221	9.00416	9.1253e-16	3.17702e-13	25.3265	7533	ILMN_1728512
LDHA	0.828762	11.4857	8.99984	9.36153e-16	3.22345e-13	25.3016	3939	ILMN_1807106
NHP2L1	-0.601571	9.67593	-8.99336	9.7268e-16	3.31282e-13	25.2643	4809	ILMN_1697614
LOC727826	-0.84785	9.10566	-8.97689	1.07217e-15	3.6124e-13	25.1695	727826	ILMN_3274666
ARG1	2.16604	8.37965	8.97276	1.09866e-15	3.66228e-13	25.1458	383	ILMN_1812281
RPL12	-0.565459	13.0932	-8.96794	1.13042e-15	3.72848e-13	25.118	6136	ILMN_1653469
CD63	1.04504	10.5981	8.9515	1.24571e-15	4.03664e-13	25.0235	967	ILMN_1753468
SPNS3	-0.703272	7.42183	-8.95097	1.24961e-15	4.03664e-13	25.0205	201305	ILMN_1668984
LOC729500	-0.89974	9.69207	-8.94448	1.29844e-15	4.12633e-13	24.9832	729500	ILMN_3229570
S100A12	2.42931	10.8396	8.94379	1.30372e-15	4.12633e-13	24.9792	6283	ILMN_1748915
LOC728139	-0.84756	10.7915	-8.93437	1.37821e-15	4.31849e-13	24.9251	728139	ILMN_3212833
PSTPIP2	1.53823	9.52449	8.91925	1.50684e-15	4.67479e-13	24.8383	9050	ILMN_1713058
BCL6	1.36912	10.4227	8.87712	1.93167e-15	5.934e-13	24.5965	604	ILMN_1737314
VNN1	1.99303	8.75569	8.86179	2.11425e-15	6.43185e-13	24.5086	8876	ILMN_1674574
RAB22A	-0.628994	8.82582	-8.85923	2.14631e-15	6.4666e-13	24.4939	57403	ILMN_1786976
LOC644907	-1.02616	11.6473	-8.84329	2.35748e-15	7.03517e-13	24.4026	644907	ILMN_3241051
LILRA3	1.96404	10.8951	8.8317	2.52383e-15	7.46053e-13	24.3363	11026	ILMN_1661631
LOC136143	-0.772359	9.51886	-8.82941	2.55811e-15	7.46206e-13	24.3231	136143	ILMN_1668228
TOP3A	-0.538321	7.9843	-8.82849	2.57197e-15	7.46206e-13	24.3179	7156	ILMN_1700487
CAMLG	-0.521157	10.8351	-8.82343	2.64967e-15	7.61694e-13	24.2889	819	ILMN_1714599
LOC148413	-0.527471	9.3546	-8.81976	2.70741e-15	7.71217e-13	24.2679	148413	ILMN_3244323
POM121C	-0.638015	10.5361	-8.81637	2.76191e-15	7.79654e-13	24.2485	100101267	ILMN_3235808
COMMD6	-0.530861	10.8901	-8.79907	3.05756e-15	8.48956e-13	24.1495	170622	ILMN_1759997
SCAP	-0.594243	10.1315	-8.79885	3.0616e-15	8.48956e-13	24.1483	22937	ILMN_1677534
LOC646993	4.37729	9.10742	8.78817	3.25977e-15	8.90334e-13	24.0872	646993	ILMN_3294365
SPOP	-0.512862	9.47056	-8.78776	3.26764e-15	8.90334e-13	24.0849	8405	ILMN_1795404
C19orf59	2.55991	10.7993	8.78554	3.31061e-15	8.94265e-13	24.0721	199675	ILMN_1762713
ZBTB32	0.570108	7.77159	8.7765	3.49104e-15	9.29991e-13	24.0205	27033	ILMN_1732981
STXBP2	1.15244	11.285	8.77596	3.50223e-15	9.29991e-13	24.0174	6813	ILMN_2159453
FLJ22662	1.31628	11.7732	8.76497	3.73565e-15	9.83637e-13	23.9546	79887	ILMN_1707286
CCR3	-1.30449	7.45414	-8.76244	3.79137e-15	9.8417e-13	23.9402	1232	ILMN_1656684
LOC643433	-0.712073	11.8879	-8.76203	3.80049e-15	9.8417e-13	23.9378	643433	ILMN_1661306
DYRK2	-0.691657	8.32644	-8.75125	4.04864e-15	1.03239e-12	23.8763	8445	ILMN_1684184
HMGB2	0.718441	10.3168	8.75109	4.0526e-15	1.03239e-12	23.8753	3148	ILMN_1654268
BCL3	1.37165	9.77597	8.73754	4.38773e-15	1.10875e-12	23.798	602	ILMN_1710514
LILRB2	1.01867	9.51305	8.73597	4.42846e-15	1.11009e-12	23.789	10288	ILMN_1695744
P2RY10	-0.662733	8.15347	-8.72259	4.78981e-15	1.19114e-12	23.7127	27334	ILMN_1784774
ACADVL	0.549199	10.1855	8.70518	5.30394e-15	1.30861e-12	23.6135	37	ILMN_1806408
RGL1	1.14546	7.99042	8.7027	5.38171e-15	1.31743e-12	23.5993	23179	ILMN_1654398
MUC1	0.564859	7.08981	8.69818	5.52612e-15	1.34229e-12	23.5735	4582	ILMN_1677314
CECR5	-0.541914	8.58572	-8.67682	6.26208e-15	1.50935e-12	23.4519	27440	ILMN_1654690
LOC653156	-1.54345	9.56624	-8.67347	6.38603e-15	1.52748e-12	23.4328	653156	ILMN_3278157
GBA	0.823102	9.31913	8.66759	6.60953e-15	1.56896e-12	23.3993	2629	ILMN_1755123
LGALS2	-1.42019	8.38967	-8.66554	6.68925e-15	1.57595e-12	23.3876	3957	ILMN_1687306
TMEM204	-1.16251	8.89466	-8.64132	7.70658e-15	1.80207e-12	23.2499	79652	ILMN_3241657
LOC441506	-0.820024	11.2587	-8.63642	7.93051e-15	1.8407e-12	23.222	441506	ILMN_3219764
ZNF395	-0.814472	9.02518	-8.63065	8.20275e-15	1.88989e-12	23.1892	55893	ILMN_1772876
RAC2	0.443366	13.7217	8.61617	8.92623e-15	2.04157e-12	23.1069	5880	ILMN_1709795
NLRC4	1.04763	8.28559	8.60371	9.59983e-15	2.17972e-12	23.0361	58484	ILMN_1796976
SQLE	0.674831	8.11597	8.59313	1.02114e-14	2.30191e-12	22.976	6713	ILMN_1772241
SNHG6	-0.70806	10.9087	-8.57798	1.11546e-14	2.49656e-12	22.8901	641638	ILMN_3248443
YAF2	-0.238097	7.21857	-8.56234	1.2219e-14	2.71539e-12	22.8014	10138	ILMN_1669303
DGCR6	-0.682221	8.89102	-8.55697	1.26074e-14	2.77906e-12	22.771	8214	ILMN_1663685
LOC729279	-0.61338	11.9601	-8.55595	1.26829e-14	2.77906e-12	22.7651	729279	ILMN_3228294
SH3GLB1	0.797355	10.8523	8.55208	1.29719e-14	2.78894e-12	22.7432	51100	ILMN_1766045
PCSK5	-0.560946	7.79721	-8.55113	1.30437e-14	2.78894e-12	22.7379	5125	ILMN_1767934
FOXO1	-0.801373	9.46218	-8.55091	1.30605e-14	2.78894e-12	22.7366	2308	ILMN_1738816
HLA-DMB	-1.21573	11.6213	-8.5506	1.3084e-14	2.78894e-12	22.7348	3109	ILMN_1761733
C17orf45	-0.65824	11.3554	-8.5448	1.35338e-14	2.86533e-12	22.702	125144	ILMN_1719224
ADK	-0.390452	7.56594	-8.52457	1.52251e-14	3.20176e-12	22.5874	132	ILMN_1768062
PGD	1.14139	11.7505	8.51781	1.5836e-14	3.29465e-12	22.5491	5226	ILMN_1794165
TRAPPC6A	-0.768016	8.97231	-8.51736	1.58771e-14	3.29465e-12	22.5466	79090	ILMN_1775703
C16orf30	-1.14368	8.75323	-8.51504	1.60929e-14	3.31748e-12	22.5335	79652	ILMN_1751559
PGLYRP1	2.07029	9.62221	8.51355	1.62336e-14	3.3246e-12	22.525	8993	ILMN_1704870
RNASE6	-1.00105	9.29591	-8.49648	1.79276e-14	3.64768e-12	22.4284	6039	ILMN_1780533
EIF3L	-0.654325	12.3443	-8.48797	1.88361e-14	3.80781e-12	22.3803	51386	ILMN_1762725
TSPAN14	0.84746	8.88878	8.48227	1.94699e-14	3.91071e-12	22.3481	81619	ILMN_1785060
TCIRG1	0.648114	9.47546	8.47157	2.07188e-14	4.13505e-12	22.2877	10312	ILMN_1694486
RNF144A	-0.576841	7.96927	-8.46295	2.17822e-14	4.31976e-12	22.239	9781	ILMN_3238326
ANKRD22	2.04227	9.37057	8.45778	2.24459e-14	4.4234e-12	22.2098	118932	ILMN_1799848
LOC283412	-0.643293	12.7295	-8.45057	2.34045e-14	4.58348e-12	22.1691	283412	ILMN_1675460
DDX18	-0.751346	9.87002	-8.44523	2.41419e-14	4.69853e-12	22.1389	8886	ILMN_1756220
CD300LB	-0.563717	7.14705	-8.43562	2.55249e-14	4.93702e-12	22.0847	124599	ILMN_1782741
LTA	-0.678713	8.61373	-8.42897	2.65288e-14	5.09972e-12	22.0472	4049	ILMN_1795464
PHTF1	0.727311	8.28704	8.42714	2.68119e-14	5.12271e-12	22.0369	10745	ILMN_1803464
C3AR1	1.356	8.37674	8.41602	2.85966e-14	5.43059e-12	21.9742	719	ILMN_1787529
SF3A3	-0.825654	10.11	-8.40507	3.04692e-14	5.75134e-12	21.9125	10946	ILMN_1705151
FXYD5	-0.497846	11.3393	-8.39927	3.15108e-14	5.91234e-12	21.8798	53827	ILMN_1704286
LOC644132	0.775663	8.19457	8.39754	3.18272e-14	5.93616e-12	21.87	644132	ILMN_3237368
LOC391126	-0.654119	11.6337	-8.39615	3.20851e-14	5.94885e-12	21.8622	391126	ILMN_3275447
ZCCHC14	-0.553794	7.55929	-8.39259	3.27523e-14	6.03683e-12	21.8422	23174	ILMN_1743456
MED10	-0.460585	9.52513	-8.38687	3.38559e-14	6.20375e-12	21.8099	84246	ILMN_1707631
CD47	-0.618881	8.6341	-8.37533	3.61934e-14	6.59351e-12	21.745	961	ILMN_1771333
CLC	-2.32919	10.4221	-8.3499	4.1928e-14	7.59405e-12	21.6019	1178	ILMN_1654875
METTL7B	1.12105	7.50983	8.32918	4.72573e-14	8.51011e-12	21.4856	196410	ILMN_2064725
SNRPN	-0.651323	9.41276	-8.31867	5.02151e-14	8.99109e-12	21.4265	6638	ILMN_1656537
AKAP7	-0.451103	7.16723	-8.29551	5.73915e-14	1.02176e-11	21.2966	9465	ILMN_1703049
DBP	-0.651431	7.89105	-8.28498	6.09853e-14	1.07961e-11	21.2375	1628	ILMN_1715555
ZNF689	-0.53171	9.07369	-8.27419	6.48985e-14	1.14019e-11	21.177	115509	ILMN_1759008
LOC643949	-0.892321	10.4319	-8.27356	6.51349e-14	1.14019e-11	21.1735	643949	ILMN_1692956
FCHSD2	-0.640617	8.33584	-8.27041	6.63266e-14	1.1546e-11	21.1559	9873	ILMN_1815734
CLYBL	-0.450609	7.38016	-8.26708	6.76084e-14	1.17041e-11	21.1373	171425	ILMN_1663538
LOC644315	-0.67667	10.9038	-8.26559	6.81931e-14	1.17404e-11	21.1289	644315	ILMN_3209676
IL18R1	1.89327	9.18852	8.26438	6.86692e-14	1.17578e-11	21.1221	8809	ILMN_1781700
CABC1	-0.766293	9.01278	-8.26196	6.96325e-14	1.1858e-11	21.1086	56997	ILMN_1731064
COG2	-0.496467	8.62688	-8.24217	7.80333e-14	1.32167e-11	20.9978	22796	ILMN_1776993
ATP5E	-0.694128	11.6519	-8.22549	8.5893e-14	1.44697e-11	20.9045	514	ILMN_3261197
BRD9	-0.454293	9.04691	-8.22334	8.69612e-14	1.45568e-11	20.8924	65980	ILMN_1651405
LOC391578	-0.580129	8.30801	-8.22258	8.73388e-14	1.45568e-11	20.8882	391578	ILMN_3286067
LOC100131905	-0.992033	11.1451	-8.21066	9.35363e-14	1.55072e-11	20.8216	100131905	ILMN_3275489
SNRNP200	-0.393257	7.50405	-8.20743	9.52846e-14	1.57139e-11	20.8036	23020	ILMN_1705928
BCAT1	0.685445	7.50528	8.20477	9.67512e-14	1.58723e-11	20.7887	586	ILMN_1766169
RNF216	-0.587205	8.46374	-8.2001	9.93815e-14	1.62189e-11	20.7626	54476	ILMN_1729980
SERPINA10	-0.90142	8.71937	-8.19904	9.99904e-14	1.62337e-11	20.7567	51156	ILMN_1793628
HMOX1	1.37183	8.74516	8.19375	1.03076e-13	1.66457e-11	20.7271	3162	ILMN_1800512
LFNG	-0.720603	10.0068	-8.19288	1.03591e-13	1.66457e-11	20.7223	3955	ILMN_1663080
EIF3H	-0.607906	10.9419	-8.19152	1.04403e-13	1.66907e-11	20.7147	8667	ILMN_1683660
RPS6P1	-0.709256	11.2806	-8.1897	1.05498e-13	1.678e-11	20.7045	440086	ILMN_3220888
MVP	0.63286	10.6045	8.18513	1.08303e-13	1.71297e-11	20.679	9961	ILMN_1803277
LOC401676	-0.759947	8.36905	-8.18435	1.0879e-13	1.71297e-11	20.6747	401676	ILMN_3292008
NPAT	-0.577917	7.38288	-8.18345	1.09355e-13	1.71327e-11	20.6696	4863	ILMN_2120965
VPREB3	-1.34987	9.60994	-8.18032	1.11335e-13	1.7315e-11	20.6522	29802	ILMN_1700147
GPR137	0.554942	9.82868	8.17987	1.11624e-13	1.7315e-11	20.6497	56834	ILMN_1804332
FKSG30	0.637861	12.4726	8.17388	1.15524e-13	1.78317e-11	20.6163	440915	ILMN_1814998
RP9	-0.52448	9.16598	-8.16887	1.18891e-13	1.82615e-11	20.5883	6100	ILMN_1687922
GCH1	1.03091	8.48475	8.15882	1.25947e-13	1.92508e-11	20.5323	2643	ILMN_1788802
HIST1H2BD	1.05538	9.30657	8.15559	1.28299e-13	1.95151e-11	20.5143	3017	ILMN_1651496
PAFAH1B1	-0.397772	10.1922	-8.14793	1.34061e-13	2.02931e-11	20.4716	5048	ILMN_1722276
C11orf2	-0.779002	10.8833	-8.13904	1.41062e-13	2.12502e-11	20.4221	738	ILMN_2077094
GPR84	2.02442	8.36672	8.13415	1.45072e-13	2.17497e-11	20.3948	53831	ILMN_1785345
LOC100129599	-0.80007	8.9112	-8.13174	1.47084e-13	2.19463e-11	20.3814	100129599	ILMN_3266944
SAMSN1	1.33251	8.78657	8.13002	1.4854e-13	2.20586e-11	20.3718	64092	ILMN_1684887
SSBP2	-0.551535	8.26638	-8.11896	1.58248e-13	2.33894e-11	20.3103	23635	ILMN_1711608
TIGA1	-0.771856	9.93578	-8.1158	1.61142e-13	2.37052e-11	20.2927	114915	ILMN_1654609
GCLM	0.630902	8.25531	8.10898	1.67549e-13	2.45327e-11	20.2548	2730	ILMN_1788547
TCF20	-0.308042	7.71774	-8.10086	1.7551e-13	2.55788e-11	20.2096	6942	ILMN_1660144
C12orf41	-0.549941	9.30282	-8.09724	1.79182e-13	2.59516e-11	20.1895	54934	ILMN_1713189
MAP1LC3A	0.647492	8.28701	8.09666	1.79779e-13	2.59516e-11	20.1863	84557	ILMN_1711986
LOC729236	-0.736455	11.3107	-8.09591	1.80553e-13	2.59516e-11	20.1821	729236	ILMN_3227529
MLF2	0.425128	9.50959	8.08851	1.88349e-13	2.69485e-11	20.141	8079	ILMN_1671885
DYSF	1.38943	11.1396	8.08714	1.89835e-13	2.70377e-11	20.1334	8291	ILMN_1810420
ITFG1	0.407213	8.50184	8.08133	1.96241e-13	2.78236e-11	20.1011	81533	ILMN_1693310
ZFP36L2	-0.702334	10.0207	-8.07537	2.03032e-13	2.86045e-11	20.068	678	ILMN_2150258
RPL4	-0.69768	12.6544	-8.07491	2.03575e-13	2.86045e-11	20.0654	6124	ILMN_1752285
P2RY8	-0.740267	10.3576	-8.07083	2.08376e-13	2.90627e-11	20.0428	286530	ILMN_1768284
SERTAD2	-0.595106	10.5142	-8.07056	2.08691e-13	2.90627e-11	20.0413	9792	ILMN_1651347
MAFG	0.433957	7.54234	8.0649	2.15549e-13	2.9885e-11	20.0099	4097	ILMN_1692260
FKBP5	1.15912	10.8614	8.0587	2.23316e-13	3.08254e-11	19.9754	2289	ILMN_1778444
SERBP1	-0.497928	9.14538	-8.05223	2.31712e-13	3.18442e-11	19.9396	26135	ILMN_1773968
HRK	-0.733954	7.49166	-8.05005	2.34608e-13	3.21013e-11	19.9275	8739	ILMN_2193706
AKIRIN2	0.6294	10.5756	8.04016	2.48229e-13	3.38175e-11	19.8726	55122	ILMN_2148847
PIM3	0.803043	8.16968	8.03359	2.57705e-13	3.49564e-11	19.8362	415116	ILMN_1672034
POTEF	0.337526	12.9588	8.02988	2.63201e-13	3.54051e-11	19.8157	728378	ILMN_1735698
MYL6	0.360455	13.615	8.02984	2.63273e-13	3.54051e-11	19.8154	4637	ILMN_1809013
UXT	-0.471418	10.741	-8.02562	2.69671e-13	3.61106e-11	19.7921	8409	ILMN_1671314
RPL27	-0.379624	13.4295	-8.02398	2.72201e-13	3.62942e-11	19.783	6155	ILMN_1656807
RTBDN	-0.295716	7.02405	-8.00861	2.97107e-13	3.93007e-11	19.6979	83546	ILMN_1748189
PPP2R2D	-0.291284	8.27105	-8.00853	2.97258e-13	3.93007e-11	19.6974	55844	ILMN_1683589
CNNM3	-0.436767	8.12354	-8.00722	2.99479e-13	3.94281e-11	19.6902	26505	ILMN_1662328
BRD2	-0.449038	11.175	-8.00583	3.01855e-13	3.95746e-11	19.6825	6046	ILMN_1758918
AXIN2	-0.815116	8.09821	-8.00498	3.03322e-13	3.96013e-11	19.6778	8313	ILMN_1724480
LOC100131866	-0.667252	9.20566	-7.99647	3.18377e-13	4.13943e-11	19.6307	100131866	ILMN_3208014
BCL11B	-0.965728	9.39514	-7.99192	3.2673e-13	4.23047e-11	19.6055	64919	ILMN_1665761
PI16	-0.461521	7.37281	-7.98771	3.34643e-13	4.31511e-11	19.5823	221476	ILMN_1766264
CSGALNACT2	0.763004	7.46638	7.9863	3.37333e-13	4.33196e-11	19.5745	55454	ILMN_1799208
FN3KRP	-0.739009	9.22148	-7.98351	3.42745e-13	4.38349e-11	19.559	79672	ILMN_1652333
LOC442232	-0.599734	7.73204	-7.96928	3.71615e-13	4.72809e-11	19.4804	442232	ILMN_3201365
LTB	-0.752809	12.3313	-7.96877	3.72706e-13	4.72809e-11	19.4775	4050	ILMN_2376204
FAM62B	-0.763192	11.0226	-7.96653	3.77477e-13	4.75456e-11	19.4652	57488	ILMN_2057573
KRBA1	-0.483433	7.7637	-7.96636	3.77828e-13	4.75456e-11	19.4643	84626	ILMN_3239060
CASP2	-0.369463	9.38303	-7.96437	3.82137e-13	4.78955e-11	19.4533	835	ILMN_1736568
MBP	-0.596272	10.5699	-7.96312	3.84859e-13	4.80446e-11	19.4464	4155	ILMN_1672660
RUNDC2C	-0.693722	8.07222	-7.96071	3.90173e-13	4.85146e-11	19.433	440352	ILMN_1690064
TSPAN18	-0.46048	7.33201	-7.95512	4.02743e-13	4.98796e-11	19.4022	90139	ILMN_1699980
CEACAM1	1.95906	9.19914	7.95333	4.06864e-13	5.01916e-11	19.3923	634	ILMN_1664330
ETS2	1.2136	9.16949	7.95048	4.13501e-13	5.08104e-11	19.3766	2114	ILMN_1720158
CCNY	-0.568651	8.73274	-7.94454	4.27693e-13	5.23489e-11	19.3438	219771	ILMN_1708991
ELP3	-0.554274	9.18813	-7.94296	4.31532e-13	5.26133e-11	19.3351	55140	ILMN_1744068
UBA3	0.513361	8.72894	7.93892	4.41563e-13	5.36277e-11	19.3128	9039	ILMN_2324157
PDE9A	-0.301962	6.95691	-7.93618	4.48471e-13	5.42564e-11	19.2977	5152	ILMN_1683063
CERK	-0.468984	9.10096	-7.92327	4.82554e-13	5.81551e-11	19.2265	64781	ILMN_1721325
LOC388707	-0.68831	10.9565	-7.92011	4.91274e-13	5.89792e-11	19.2091	388707	ILMN_3198247
LOC728060	-0.612757	8.25855	-7.91183	5.14887e-13	6.14085e-11	19.1635	728060	ILMN_3209631
SLCO4A1	1.07767	7.72596	7.91117	5.16816e-13	6.14085e-11	19.1598	28231	ILMN_1727200
RNF19B	1.17158	9.07092	7.91043	5.18983e-13	6.14085e-11	19.1558	127544	ILMN_1682081
LOC729798	-0.548038	11.9831	-7.90988	5.20601e-13	6.14085e-11	19.1527	729798	ILMN_3226301
FBL	-0.848756	10.4783	-7.90964	5.21308e-13	6.14085e-11	19.1514	2091	ILMN_1719205
VEZF1	-0.38124	10.1184	-7.90851	5.24673e-13	6.15734e-11	19.1452	7716	ILMN_1705310
GLIPR1	-0.801072	9.99192	-7.90742	5.27915e-13	6.17227e-11	19.1392	11010	ILMN_1769245
LOC441073	-0.570548	11.3284	-7.89668	5.61043e-13	6.53521e-11	19.08	441073	ILMN_3213692
2009-09-01	-0.672845	12.7737	-7.88479	6.00096e-13	6.96423e-11	19.0146	10801	ILMN_1769118
RPL5	-0.713675	11.9936	-7.87902	6.20046e-13	7.1692e-11	18.9829	6125	ILMN_2087080
LOC388339	-0.755587	11.6057	-7.87466	6.35522e-13	7.32112e-11	18.9589	388339	ILMN_3279675
C16orf74	-0.557191	7.35461	-7.86471	6.72298e-13	7.7164e-11	18.9042	404550	ILMN_1806149
CEBPB	0.765047	13.3467	7.85848	6.96427e-13	7.96418e-11	18.87	1051	ILMN_1693014
LDLR	0.941299	9.56728	7.85464	7.11691e-13	8.10913e-11	18.8489	3949	ILMN_2053415
ARID3A	0.623704	9.93962	7.83545	7.93191e-13	8.97661e-11	18.7435	1820	ILMN_1670130
RPL12P6	-0.978139	8.23219	-7.83537	7.93554e-13	8.97661e-11	18.7431	440176	ILMN_3226244
C20orf3	0.966803	10.1127	7.83055	8.15468e-13	9.15984e-11	18.7166	57136	ILMN_1674394
RPL17	-0.416244	12.8162	-7.83052	8.15598e-13	9.15984e-11	18.7165	6139	ILMN_1655422
MAP3K8	0.569241	8.925	7.82401	8.46099e-13	9.46845e-11	18.6808	1326	ILMN_1741159
ZNF317	-0.497593	8.30133	-7.82322	8.49901e-13	9.47715e-11	18.6765	57693	ILMN_1680347
AKR1C3	-0.888786	7.75323	-7.81958	8.67544e-13	9.63958e-11	18.6565	8644	ILMN_1713124
TPP1	0.594919	10.6007	7.81797	8.7546e-13	9.69317e-11	18.6477	1200	ILMN_1729234
IFITM3	1.14778	13.498	7.81042	9.13558e-13	1.00794e-10	18.6063	10410	ILMN_1805750
RPL15	-0.670672	11.8862	-7.80673	9.32736e-13	1.02307e-10	18.5861	6138	ILMN_1762747
PAPD1	-0.420955	8.14434	-7.80653	9.33799e-13	1.02307e-10	18.585	55149	ILMN_1742569
SMARCD3	0.634146	7.67377	7.80393	9.47579e-13	1.03454e-10	18.5707	6604	ILMN_1693244
ADCK2	-0.598048	8.69284	-7.80287	9.53298e-13	1.03717e-10	18.5649	90956	ILMN_1663132
SAT1	0.797536	12.9343	7.79589	9.91507e-13	1.07309e-10	18.5267	6303	ILMN_1753342
C17orf58	0.261428	7.35646	7.7956	9.93154e-13	1.07309e-10	18.5251	284018	ILMN_1688997
BRI3	0.880074	11.6208	7.7845	1.05723e-12	1.13839e-10	18.4644	25798	ILMN_1781580
GNG5	0.670749	9.24144	7.7838	1.0614e-12	1.13897e-10	18.4605	2787	ILMN_1701854
CD79B	-0.890079	11.0515	-7.77918	1.08939e-12	1.16502e-10	18.4352	974	ILMN_1710017
KIF1B	0.729336	8.16205	7.76946	1.15066e-12	1.22635e-10	18.3821	23095	ILMN_1659444
LOC88523	0.835653	9.08315	7.7686	1.15626e-12	1.22815e-10	18.3774	88523	ILMN_1737561
OGFR	0.497789	9.37266	7.76497	1.18013e-12	1.24927e-10	18.3575	11054	ILMN_1728224
TCF25	-0.545985	10.7468	-7.76347	1.19009e-12	1.25556e-10	18.3494	22980	ILMN_1814971
DCI	-0.66497	8.54416	-7.75843	1.22437e-12	1.2874e-10	18.3218	1632	ILMN_2049303
SLC2A14	1.01736	7.6802	7.75606	1.24078e-12	1.30029e-10	18.3088	144195	ILMN_1668865
TMEM134	-0.552648	9.23484	-7.74995	1.28413e-12	1.34049e-10	18.2755	80194	ILMN_1770977
CD96	-1.02618	9.76118	-7.74946	1.2877e-12	1.34049e-10	18.2728	10225	ILMN_1711573
NBN	0.749072	8.12067	7.73738	1.37816e-12	1.42991e-10	18.2068	4683	ILMN_1717016
STMN3	-0.898477	10.6987	-7.7317	1.42285e-12	1.46946e-10	18.1758	50861	ILMN_3244117
H2AFJ	0.86875	10.4795	7.73135	1.42566e-12	1.46946e-10	18.1739	55766	ILMN_1708728
PIK4CA	-0.411828	8.93787	-7.73054	1.43218e-12	1.47135e-10	18.1695	5297	ILMN_1655177
PLEKHG3	-0.809992	9.07927	-7.72376	1.48776e-12	1.52345e-10	18.1325	26030	ILMN_1780671
CCDC72	-0.435739	12.234	-7.71963	1.52263e-12	1.55408e-10	18.11	51372	ILMN_1707783
TP53RK	-0.511402	8.68417	-7.71746	1.54128e-12	1.56322e-10	18.0981	112858	ILMN_1764851
GBP2	0.698759	12.2537	7.71743	1.54157e-12	1.56322e-10	18.098	2634	ILMN_1774077
HLA-DOA	-0.819883	8.7402	-7.7145	1.56714e-12	1.58402e-10	18.082	3111	ILMN_1659075
MXD4	-0.795089	10.6368	-7.71342	1.57663e-12	1.5885e-10	18.0761	10608	ILMN_1756541
LRP8	0.27838	7.26042	7.71046	1.60303e-12	1.60991e-10	18.06	7804	ILMN_1677765
APRT	-0.692687	10.0006	-7.69936	1.70608e-12	1.70793e-10	17.9995	353	ILMN_1722491
ZNF845	-0.396865	7.86248	-7.69313	1.76665e-12	1.75885e-10	17.9656	91664	ILMN_3237579
FAM117B	-0.792306	9.17173	-7.69298	1.76816e-12	1.75885e-10	17.9648	150864	ILMN_1739942
POLE3	-0.563438	10.6784	-7.6781	1.92195e-12	1.90577e-10	17.8837	54107	ILMN_1785198
LOC643863	-0.438988	13.5422	-7.67274	1.98046e-12	1.95759e-10	17.8546	643863	ILMN_3290497
BCKDHA	-0.700468	8.85389	-7.67149	1.99442e-12	1.9652e-10	17.8478	593	ILMN_1735979
MADD	-0.288663	7.52612	-7.66977	2.01369e-12	1.97796e-10	17.8385	8567	ILMN_1671710
KIAA1210	3.84269	8.71472	7.65948	2.13309e-12	2.08869e-10	17.7825	57481	ILMN_1732962
PMEPA1	-0.326138	7.29511	-7.65889	2.14019e-12	2.08912e-10	17.7793	56937	ILMN_1657823
UBE2Q2	-0.544243	8.64331	-7.6512	2.23431e-12	2.17422e-10	17.7375	92912	ILMN_1683817
TCF4	-0.666334	8.02039	-7.65012	2.24781e-12	2.18058e-10	17.7316	6925	ILMN_1814194
NELL2	-1.06011	8.74885	-7.643	2.33915e-12	2.26219e-10	17.6929	4753	ILMN_1725417
LOC391019	-0.846378	9.27235	-7.63486	2.44794e-12	2.36012e-10	17.6488	391019	ILMN_3286813
ARHGEF18	-0.573018	11.6451	-7.62937	2.52421e-12	2.42619e-10	17.619	23370	ILMN_1664016
DNAJC8	-0.47946	11.0396	-7.62635	2.5672e-12	2.45996e-10	17.6026	22826	ILMN_1698258
OPLAH	0.83749	7.46285	7.61394	2.75145e-12	2.62847e-10	17.5353	26873	ILMN_1711030
STS-1	0.61521	9.14715	7.6033	2.91971e-12	2.78074e-10	17.4776	84959	ILMN_1653856
SELM	3.30903	9.06615	7.60089	2.95932e-12	2.80992e-10	17.4646	140606	ILMN_1651429
LOC100133390	-0.486371	8.38741	-7.58808	3.17835e-12	3.00878e-10	17.3952	100133390	ILMN_3286685
CD3G	-1.08897	9.07686	-7.58343	3.26192e-12	3.07859e-10	17.37	917	ILMN_1717197
DDX27	-0.568623	8.09831	-7.56785	3.5577e-12	3.34766e-10	17.2857	55661	ILMN_1676759
YME1L1	0.368709	9.07195	7.56599	3.59474e-12	3.37238e-10	17.2757	10730	ILMN_1734316
KIAA0913	0.519863	9.71061	7.56096	3.69667e-12	3.45766e-10	17.2485	23053	ILMN_1669433
CRTAP	-0.442115	7.82489	-7.55369	3.84929e-12	3.58969e-10	17.2092	10491	ILMN_1665235
ETFDH	0.427406	8.20768	7.55214	3.88283e-12	3.61023e-10	17.2008	2110	ILMN_1758034
SLC39A8	1.22068	7.94028	7.54324	4.0797e-12	3.78205e-10	17.1528	64116	ILMN_1695316
RTN1	-0.408226	7.31512	-7.53987	4.15692e-12	3.84227e-10	17.1346	6252	ILMN_1756928
MGC87895	-0.772265	10.7368	-7.5369	4.22608e-12	3.89471e-10	17.1186	644068	ILMN_3225761
CD177	1.66618	7.59912	7.53243	4.33245e-12	3.98102e-10	17.0944	57126	ILMN_1774071
MOBKL1B	0.788937	9.41268	7.53134	4.35883e-12	3.99356e-10	17.0885	55233	ILMN_3242011
RPL13A	-0.671836	13.1486	-7.52755	4.4515e-12	4.06657e-10	17.0681	23521	ILMN_1713369
C16orf53	-0.422057	8.92544	-7.52634	4.48158e-12	4.08214e-10	17.0616	79447	ILMN_1727444
ORAOV1	-0.52433	8.146	-7.52569	4.49775e-12	4.085e-10	17.0581	220064	ILMN_1762549
AGTRAP	0.794469	9.50168	7.52273	4.57243e-12	4.14082e-10	17.0421	57085	ILMN_1802458
MIR488	-0.297803	7.36498	-7.51764	4.7034e-12	4.24716e-10	17.0147	574441	ILMN_3308778
HEATR5B	-0.406226	8.8883	-7.51543	4.76151e-12	4.28728e-10	17.0028	54497	ILMN_1810805
VEZT	-0.312721	7.67027	-7.51207	4.85125e-12	4.35556e-10	16.9846	55591	ILMN_1774828
LOC158345	-0.726	12.0958	-7.50969	4.91567e-12	4.40079e-10	16.9718	158345	ILMN_1685538
LOC440311	-0.748459	9.32313	-7.50508	5.04302e-12	4.50194e-10	16.947	440311	ILMN_3202591
C11orf46	-0.599346	7.91829	-7.50294	5.10348e-12	4.54297e-10	16.9354	120534	ILMN_1767642
YIPF4	0.456271	8.50453	7.50142	5.14654e-12	4.56832e-10	16.9273	84272	ILMN_1782444
FAM159A	-0.62753	7.87449	-7.49987	5.19114e-12	4.59161e-10	16.9189	348378	ILMN_2185675
TSC22D4	0.522092	9.11772	7.49949	5.20208e-12	4.59161e-10	16.9168	81628	ILMN_1721636
C7orf59	-0.597957	11.1911	-7.49736	5.26375e-12	4.63298e-10	16.9054	389541	ILMN_1779735
PTPRJ	0.526938	7.55741	7.49655	5.28766e-12	4.64099e-10	16.901	5795	ILMN_1731589
CCDC92	-0.681013	9.68511	-7.49492	5.3356e-12	4.66999e-10	16.8922	80212	ILMN_1731107
SLC26A8	0.577769	7.37538	7.48997	5.48404e-12	4.78654e-10	16.8656	116369	ILMN_1656849
KIAA1147	-0.5265	8.46591	-7.48743	5.56175e-12	4.84088e-10	16.8519	57189	ILMN_1857069
KLRF1	-0.768243	7.96891	-7.48639	5.59403e-12	4.84247e-10	16.8463	51348	ILMN_1685521
PPPDE2	0.579723	9.98239	7.48637	5.59448e-12	4.84247e-10	16.8462	27351	ILMN_1737580
CCRL2	1.16356	7.91773	7.48414	5.66401e-12	4.88915e-10	16.8342	9034	ILMN_3190833
C12orf10	-0.708239	9.94875	-7.48284	5.70508e-12	4.91107e-10	16.8272	60314	ILMN_1777765
LOC390354	-0.837973	12.8024	-7.47727	5.88381e-12	5.05105e-10	16.7973	390354	ILMN_1676765
RPL22	-0.72305	10.8444	-7.47078	6.09918e-12	5.22163e-10	16.7624	6146	ILMN_2079386
SLA	0.785552	10.5988	7.46846	6.17827e-12	5.27493e-10	16.7499	6503	ILMN_1667371
CCNB1IP1	-0.367388	7.60109	-7.46189	6.40713e-12	5.45231e-10	16.7146	57820	ILMN_1714386
C1orf19	-0.600834	8.32901	-7.4615	6.42083e-12	5.45231e-10	16.7125	116461	ILMN_1734486
PHRF1	-0.422105	9.55528	-7.45941	6.49552e-12	5.50083e-10	16.7013	57661	ILMN_1766593
FCER2	-1.08994	8.23057	-7.45759	6.56151e-12	5.54174e-10	16.6915	2208	ILMN_1662451
ZBTB42	-0.467216	7.97868	-7.45683	6.58902e-12	5.55001e-10	16.6874	100128927	ILMN_3239445
NBEAL2	0.739319	9.77004	7.45583	6.62546e-12	5.56574e-10	16.682	23218	ILMN_1660629
PANK2	0.436291	8.98176	7.45049	6.8243e-12	5.71745e-10	16.6533	80025	ILMN_1708095
MIIP	0.670519	7.99941	7.44411	7.06926e-12	5.90689e-10	16.6191	60672	ILMN_1783843
C9orf45	-0.715046	7.55938	-7.44066	7.20565e-12	5.99795e-10	16.6006	81571	ILMN_1719998
MGAM	0.976223	7.88785	7.44038	7.21653e-12	5.99795e-10	16.5991	8972	ILMN_1683897
LOC440991	-0.701981	9.19109	-7.43595	7.39574e-12	6.13063e-10	16.5753	440991	ILMN_3283449
HTRA2	0.342919	8.34932	7.43227	7.54764e-12	6.24005e-10	16.5556	27429	ILMN_1747204
LOC651436	-0.628158	13.1304	-7.42812	7.72263e-12	6.36792e-10	16.5333	651436	ILMN_1769277
ANXA3	1.60591	9.13263	7.41995	8.07894e-12	6.64424e-10	16.4895	306	ILMN_1694548
GAS6	0.689788	7.70265	7.41851	8.14339e-12	6.67971e-10	16.4818	2621	ILMN_1768260
CCL3	1.17059	8.15773	7.41709	8.20782e-12	6.71498e-10	16.4742	6348	ILMN_1671509
LOC391833	-0.851455	11.5296	-7.41597	8.25885e-12	6.73913e-10	16.4682	391833	ILMN_3290577
VIPR1	-0.654113	8.29299	-7.41441	8.32988e-12	6.77944e-10	16.4598	7433	ILMN_2199389
ANKS1A	0.527368	8.75306	7.41345	8.37435e-12	6.79797e-10	16.4547	23294	ILMN_1813669
FAM69A	-0.426333	7.70513	-7.41292	8.39873e-12	6.80015e-10	16.4519	388650	ILMN_1682577
USP24	-0.521679	9.60048	-7.41135	8.47217e-12	6.84193e-10	16.4434	23358	ILMN_1684594
LOC648249	-0.625375	11.4121	-7.40416	8.8147e-12	7.0862e-10	16.4049	648249	ILMN_1665148
HLA-DMA	-0.768375	11.6045	-7.40406	8.81987e-12	7.0862e-10	16.4044	3108	ILMN_1695311
TCN2	0.68497	7.59676	7.39979	9.02975e-12	7.23627e-10	16.3815	6948	ILMN_1740572
ATP6V0E2	-0.832245	10.3755	-7.39642	9.19923e-12	7.35328e-10	16.3635	155066	ILMN_1785095
LOC338870	-0.671433	12.3188	-7.39282	9.38363e-12	7.4611e-10	16.3442	338870	ILMN_3294074
LOC728782	-0.512176	12.8144	-7.39244	9.40321e-12	7.4611e-10	16.3422	728782	ILMN_3225634
TRAF3IP3	-0.689204	9.92554	-7.3924	9.40554e-12	7.4611e-10	16.342	80342	ILMN_1780397
ZNF101	-0.631684	7.63702	-7.38302	9.90435e-12	7.80366e-10	16.2918	94039	ILMN_1695079
MARCO	0.990005	7.76235	7.38298	9.90683e-12	7.80366e-10	16.2916	8685	ILMN_1731503
NUCB1	0.625939	12.8027	7.38288	9.9121e-12	7.80366e-10	16.2911	4924	ILMN_1722634
IMP3	-0.544992	11.1296	-7.37061	1.06053e-11	8.31664e-10	16.2255	55272	ILMN_1733696
UPP1	0.964383	9.53117	7.37041	1.06168e-11	8.31664e-10	16.2244	7378	ILMN_1742764
EHBP1L1	0.672381	10.8967	7.36766	1.0779e-11	8.3836e-10	16.2097	254102	ILMN_3244457
ARHGAP17	-0.506926	9.14979	-7.36764	1.07804e-11	8.3836e-10	16.2096	55114	ILMN_1718610
MFNG	-0.582794	10.8581	-7.3676	1.07825e-11	8.3836e-10	16.2094	4242	ILMN_1764577
SORT1	0.909918	9.25145	7.36689	1.08246e-11	8.39548e-10	16.2056	6272	ILMN_1707077
C12orf57	-0.777885	10.9127	-7.35976	1.12583e-11	8.70628e-10	16.1675	113246	ILMN_1812191
CNIH4	0.78106	9.90903	7.35902	1.13041e-11	8.70628e-10	16.1635	29097	ILMN_1714759
MKNK1	0.70043	8.66339	7.35894	1.13087e-11	8.70628e-10	16.1631	8569	ILMN_1725738
NOL6	-0.371911	8.32862	-7.35357	1.16481e-11	8.94566e-10	16.1344	65083	ILMN_1665442
LOC440731	0.930971	8.20002	7.34582	1.21553e-11	9.31233e-10	16.0931	440731	ILMN_1683250
ITGAM	1.16341	10.6666	7.3434	1.23181e-11	9.41406e-10	16.0802	3684	ILMN_1685009
EXOSC5	-0.563033	8.29289	-7.3412	1.24678e-11	9.50526e-10	16.0685	56915	ILMN_1659725
LOC100132299	-0.584955	9.28095	-7.34075	1.2499e-11	9.50594e-10	16.066	100132299	ILMN_3249261
DMRT2	3.07234	8.08772	7.33989	1.25578e-11	9.52749e-10	16.0615	10655	ILMN_1728183
BTBD11	-0.361268	7.29536	-7.33729	1.27389e-11	9.64156e-10	16.0476	121551	ILMN_1654153
FBXO21	-0.417443	8.62794	-7.32551	1.35903e-11	1.02611e-09	15.9848	23014	ILMN_1745887
LOC729208	-0.874304	9.72417	-7.32422	1.36866e-11	1.0309e-09	15.978	729208	ILMN_3304003
LOC730187	-0.492119	13.2076	-7.32258	1.38108e-11	1.03776e-09	15.9692	730187	ILMN_3296979
LOC100127993	-0.550255	12.618	-7.32117	1.39177e-11	1.04292e-09	15.9617	100127993	ILMN_3262025
LOC389672	-0.598972	8.38731	-7.32081	1.39459e-11	1.04292e-09	15.9597	389672	ILMN_1679700
RTN4	0.515244	9.2119	7.31937	1.4056e-11	1.04865e-09	15.9521	57142	ILMN_1693598
FAM20A	0.460397	7.17403	7.31762	1.41918e-11	1.05626e-09	15.9428	54757	ILMN_1812091
PSMD1	0.699311	8.96935	7.3171	1.42328e-11	1.0568e-09	15.94	5707	ILMN_1702837
PDCD4	-0.584029	10.5254	-7.31628	1.4297e-11	1.05906e-09	15.9356	27250	ILMN_1768004
LOC648710	0.485886	7.32156	7.31228	1.46142e-11	1.08001e-09	15.9143	648710	ILMN_1710698
RPL14L	-0.573203	12.497	-7.30288	1.53876e-11	1.13438e-09	15.8643	144581	ILMN_3225591
LOC650795	-0.428047	7.57093	-7.30247	1.54225e-11	1.13438e-09	15.8621	650795	ILMN_1790771
RHOG	0.533629	12.613	7.29677	1.59115e-11	1.16761e-09	15.8318	391	ILMN_1739792
SPG7	-0.389582	8.29717	-7.29369	1.61824e-11	1.18472e-09	15.8154	6687	ILMN_1675583
GBP1	1.52569	10.734	7.28954	1.6555e-11	1.20905e-09	15.7933	2633	ILMN_1701114
LOC728744	1.20636	8.07935	7.28913	1.65919e-11	1.20905e-09	15.7912	728744	ILMN_1654389
EDC4	-0.478517	9.58449	-7.28846	1.66535e-11	1.21072e-09	15.7876	23644	ILMN_1665212
RTCD1	0.398561	8.61524	7.28314	1.71459e-11	1.24363e-09	15.7593	8634	ILMN_1808305
LOC388532	-0.801103	11.5627	-7.28213	1.72405e-11	1.24761e-09	15.754	388532	ILMN_1656292
ACP2	0.756742	8.18976	7.27939	1.75017e-11	1.26359e-09	15.7394	53	ILMN_2104830
HIST2H2AA4	1.17061	11.5748	7.27879	1.75592e-11	1.26483e-09	15.7362	723790	ILMN_3242900
SLAMF7	0.62603	8.31243	7.27123	1.83014e-11	1.31526e-09	15.696	57823	ILMN_1710923
RPRD2	-0.470238	8.25906	-7.27078	1.8346e-11	1.31546e-09	15.6937	23248	ILMN_3238889
DIMT1L	-0.647162	9.33399	-7.26372	1.90686e-11	1.36414e-09	15.6562	27292	ILMN_1803312
FNTA	-0.345068	9.25431	-7.26064	1.93928e-11	1.38417e-09	15.6399	2339	ILMN_1721704
LOC100132199	-0.619574	8.05316	-7.25654	1.98325e-11	1.41234e-09	15.6181	100132199	ILMN_3289730
UBAC2	-0.537193	9.39405	-7.25179	2.03547e-11	1.44624e-09	15.5929	337867	ILMN_1713993
LOC642755	-0.496802	9.5369	-7.24899	2.06683e-11	1.46502e-09	15.5781	642755	ILMN_1655244
LOC730004	-0.507946	10.5497	-7.2486	2.07125e-11	1.46502e-09	15.576	730004	ILMN_3224860
SPI1	0.950613	11.4581	7.24623	2.09825e-11	1.48078e-09	15.5634	6688	ILMN_1696463
SNORD13	-0.877376	8.30224	-7.24481	2.11461e-11	1.48897e-09	15.5559	692084	ILMN_1892403
AOF2	-0.592057	8.70736	-7.24147	2.15358e-11	1.51301e-09	15.5382	23028	ILMN_1813840
LOC100130476	-0.290638	7.45762	-7.2367	2.21036e-11	1.54943e-09	15.5129	100130476	ILMN_3257004
SNAPC4	-0.515989	8.55284	-7.23374	2.24638e-11	1.57116e-09	15.4973	6621	ILMN_1677484
DHRS9	1.28425	9.21594	7.23306	2.25479e-11	1.57353e-09	15.4936	10170	ILMN_1727150
CYBASC3	-0.666037	10.0524	-7.23148	2.27436e-11	1.58367e-09	15.4852	220002	ILMN_2129505
BMX	0.72298	7.47523	7.22821	2.31524e-11	1.60855e-09	15.468	660	ILMN_1672307
MED29	-0.477967	8.72944	-7.22536	2.35152e-11	1.63015e-09	15.4529	55588	ILMN_1728360
GPR44	-0.87639	7.11654	-7.22435	2.36453e-11	1.63308e-09	15.4475	11251	ILMN_1703326
LIMK2	0.85259	7.745	7.22403	2.36875e-11	1.63308e-09	15.4458	3985	ILMN_1660624
MAP3K4	-0.423244	8.02835	-7.22382	2.37139e-11	1.63308e-09	15.4447	4216	ILMN_1678087
ZNF362	-0.535113	8.71618	-7.22189	2.39652e-11	1.64677e-09	15.4345	149076	ILMN_1686968
ZNF816A	-0.496797	7.90902	-7.22	2.42134e-11	1.66018e-09	15.4245	125893	ILMN_1728710
LOC389816	-0.283633	7.16718	-7.21934	2.4301e-11	1.66255e-09	15.421	389816	ILMN_1722054
RPS6KA5	-0.430174	7.85599	-7.21886	2.43647e-11	1.66327e-09	15.4185	9252	ILMN_1657515
TRAF3IP2	-0.326017	7.61581	-7.21812	2.44636e-11	1.6664e-09	15.4145	10758	ILMN_1663381
PKM2	0.825347	9.06835	7.21724	2.45811e-11	1.67077e-09	15.4099	5315	ILMN_1672650
LOC100134273	-0.705848	8.92592	-7.21427	2.49825e-11	1.69117e-09	15.3942	100134273	ILMN_3245517
BEXL1	-0.522674	8.83098	-7.21422	2.49893e-11	1.69117e-09	15.3939	56271	ILMN_1773504
MRFAP1L1	-0.414901	9.13615	-7.2125	2.52248e-11	1.70344e-09	15.3848	114932	ILMN_1689774
BAT5	0.461812	9.0095	7.21203	2.529e-11	1.70416e-09	15.3823	7920	ILMN_2152402
NFKBIZ	0.656489	9.62015	7.21003	2.55675e-11	1.71618e-09	15.3717	64332	ILMN_1719695
PPIA	-0.517467	7.57723	-7.20995	2.55779e-11	1.71618e-09	15.3713	5478	ILMN_1704529
LOC642161	-0.716687	8.44576	-7.20771	2.58926e-11	1.73359e-09	15.3595	642161	ILMN_1651403
LOC642684	1.00415	8.01206	7.20399	2.64225e-11	1.76529e-09	15.3398	642684	ILMN_1700855
SCD	0.931334	8.11986	7.19706	2.74399e-11	1.82937e-09	15.3032	6319	ILMN_1689329
FCGR1A	1.64393	9.9495	7.19624	2.75626e-11	1.83365e-09	15.2988	2209	ILMN_2176063
NCRNA00219	-0.729396	9.62295	-7.1912	2.83294e-11	1.87983e-09	15.2722	114915	ILMN_3244583
LOC100133583	-1.16443	10.902	-7.1909	2.83769e-11	1.87983e-09	15.2706	100133583	ILMN_3214389
OCIAD2	-0.747869	9.01098	-7.19044	2.84468e-11	1.88049e-09	15.2682	132299	ILMN_1700306
LOC100128936	-0.694957	11.2666	-7.18801	2.88261e-11	1.90155e-09	15.2554	100128936	ILMN_3267760
TUBA1A	0.482336	12.4428	7.18139	2.98836e-11	1.96717e-09	15.2204	7846	ILMN_1742981
LOC642103	1.46635	9.37288	7.17822	3.04044e-11	1.99726e-09	15.2037	642103	ILMN_1712999
C12orf65	-0.558475	8.25051	-7.17606	3.07644e-11	2.01668e-09	15.1923	91574	ILMN_1667510
RPL30	-0.378241	13.9536	-7.17477	3.09808e-11	2.02662e-09	15.1855	6156	ILMN_1754303
FLJ40125	0.502476	7.42579	7.17363	3.11736e-11	2.03223e-09	15.1795	147699	ILMN_1803357
TDRD9	0.600231	7.33921	7.1735	3.11962e-11	2.03223e-09	15.1787	122402	ILMN_1811110
LOC644937	-0.698271	8.5988	-7.17121	3.15858e-11	2.05334e-09	15.1667	644937	ILMN_3283470
TNFAIP6	1.60054	9.0703	7.17032	3.17401e-11	2.0591e-09	15.162	7130	ILMN_1785732
FBLN2	-0.389315	7.17351	-7.1696	3.1864e-11	2.06286e-09	15.1582	2199	ILMN_1721769
ZNF721	-0.419721	8.51817	-7.16805	3.21336e-11	2.07603e-09	15.15	170960	ILMN_1805271
SNHG8	-0.475048	8.32263	-7.16537	3.26052e-11	2.10216e-09	15.1359	440957	ILMN_1815658
RXRB	-0.442475	9.74303	-7.16494	3.26816e-11	2.10276e-09	15.1336	6257	ILMN_1774074
WAS	0.651658	12.4536	7.1634	3.29565e-11	2.11347e-09	15.1255	7454	ILMN_1760027
FBXL10	-0.506745	8.97749	-7.16324	3.29863e-11	2.11347e-09	15.1246	84678	ILMN_1658232
LOC389404	-0.61315	12.0337	-7.16288	3.30503e-11	2.11347e-09	15.1228	389404	ILMN_3200661
CNO	-0.556058	9.3463	-7.1625	3.31187e-11	2.11353e-09	15.1208	55330	ILMN_1685095
BMS1	-0.404526	8.67103	-7.15947	3.36692e-11	2.14429e-09	15.1048	9790	ILMN_1772713
EIF3E	-0.562172	12.3399	-7.15519	3.44604e-11	2.19023e-09	15.0822	3646	ILMN_1739257
TROAP	0.48034	7.40078	7.15061	3.53287e-11	2.24087e-09	15.0581	10024	ILMN_1700337
IDH1	0.442569	8.7335	7.14917	3.56062e-11	2.25391e-09	15.0505	3417	ILMN_1696432
G6PD	0.54371	9.69335	7.14557	3.63088e-11	2.29375e-09	15.0316	2539	ILMN_1697559
EBI2	-0.700575	8.97855	-7.14375	3.66706e-11	2.31195e-09	15.022	1880	ILMN_1798706
KTELC1	-0.407287	8.74245	-7.14282	3.68561e-11	2.31475e-09	15.0171	56983	ILMN_1774800
PUM2	-0.341252	9.76867	-7.14279	3.68629e-11	2.31475e-09	15.0169	23369	ILMN_1728305
ZAK	0.389245	7.41962	7.14213	3.69947e-11	2.31839e-09	15.0134	51776	ILMN_1672390
C2orf89	-0.773975	8.35582	-7.14052	3.73183e-11	2.334e-09	15.005	129293	ILMN_3235176
ZSWIM1	-0.539701	8.53684	-7.13945	3.75369e-11	2.34299e-09	14.9993	90204	ILMN_1812856
AIM2	1.0317	9.15138	7.13698	3.80438e-11	2.36991e-09	14.9863	9447	ILMN_1681301
MAPK14	0.600206	7.54969	7.13649	3.81454e-11	2.37153e-09	14.9837	1432	ILMN_1720656
FABP5L2	0.832073	8.51327	7.13233	3.90144e-11	2.41952e-09	14.9619	729163	ILMN_3178258
PGS1	0.977129	10.1985	7.13206	3.90719e-11	2.41952e-09	14.9605	9489	ILMN_2075051
TGFBR2	-0.425729	10.4402	-7.13052	3.94013e-11	2.43511e-09	14.9523	7048	ILMN_1726245
MEF2D	-0.589175	8.78104	-7.12302	4.10361e-11	2.53115e-09	14.9129	4209	ILMN_1763228
CKAP4	1.16261	10.6874	7.12243	4.11673e-11	2.53426e-09	14.9098	10970	ILMN_1790891
LYRM4	-0.405898	7.50268	-7.1205	4.16013e-11	2.55595e-09	14.8996	57128	ILMN_1740927
PNKD	0.563265	7.87076	7.11662	4.24857e-11	2.60518e-09	14.8792	25953	ILMN_1652161
ZNF32	-0.225039	7.69115	-7.1159	4.26519e-11	2.61027e-09	14.8754	7580	ILMN_1673112
CTDSPL2	-0.313062	7.69706	-7.1041	4.54676e-11	2.77716e-09	14.8135	51496	ILMN_1665655
SH2D1A	-0.73095	9.89205	-7.10244	4.58769e-11	2.79671e-09	14.8048	4068	ILMN_1705892
VWA5A	0.330252	7.53526	7.1019	4.60124e-11	2.79952e-09	14.8019	4013	ILMN_1682996
RPA1	-0.560072	9.62176	-7.10126	4.61721e-11	2.80379e-09	14.7986	6117	ILMN_1795719
HIST2H2AA3	1.16384	11.106	7.09841	4.68905e-11	2.84191e-09	14.7836	8337	ILMN_1659047
FLOT1	0.997592	10.6697	7.09094	4.88244e-11	2.95341e-09	14.7444	10211	ILMN_1661439
GZMM	-0.8874	9.26928	-7.08977	4.9134e-11	2.96641e-09	14.7383	3004	ILMN_1690561
LOC401537	-0.616149	11.5314	-7.08421	5.06363e-11	3.05123e-09	14.7091	401537	ILMN_3219643
IVNS1ABP	0.697342	8.70896	7.08303	5.09603e-11	3.06486e-09	14.7029	10625	ILMN_1715133
C5orf13	-0.622265	8.07502	-7.07983	5.1849e-11	3.11233e-09	14.6861	9315	ILMN_1680738
KLF12	-0.385156	7.59606	-7.07783	5.2414e-11	3.14023e-09	14.6756	11278	ILMN_1714444
LOC731878	0.394261	8.6165	7.07354	5.36422e-11	3.20768e-09	14.6532	731878	ILMN_1791827
LSM10	-0.394416	10.0743	-7.07129	5.42987e-11	3.24068e-09	14.6414	84967	ILMN_1751803
PRDM4	-0.387651	9.20304	-7.07094	5.44009e-11	3.24068e-09	14.6396	11108	ILMN_1691432
PHB	-0.496841	8.76075	-7.06581	5.59303e-11	3.32547e-09	14.6127	5245	ILMN_1692651
LOC641814	-0.468626	13.3829	-7.05854	5.8171e-11	3.45214e-09	14.5746	641814	ILMN_3243297
LOC100128115	-0.322399	7.38873	-7.05744	5.85174e-11	3.46249e-09	14.5688	100128115	ILMN_3271081
UBASH3A	-0.574387	7.68705	-7.05729	5.85663e-11	3.46249e-09	14.568	53347	ILMN_1684450
LEPROTL1	-0.633169	10.1496	-7.04887	6.12877e-11	3.61655e-09	14.524	23484	ILMN_1752591
LOC402694	-0.554394	12.4279	-7.04472	6.26763e-11	3.69154e-09	14.5023	402694	ILMN_1738356
MMP8	1.87013	7.47998	7.04188	6.36429e-11	3.74144e-09	14.4875	4317	ILMN_1736026
CERKL	-0.305731	7.1131	-7.04101	6.39427e-11	3.75202e-09	14.4829	375298	ILMN_1740837
ZNF683	-1.15937	8.34238	-7.04047	6.41294e-11	3.75594e-09	14.4801	257101	ILMN_1678238
LRRK2	0.828751	8.4738	7.03391	6.64387e-11	3.88393e-09	14.4458	120892	ILMN_1776649
DBT	-0.356189	7.92775	-7.02871	6.83271e-11	3.98689e-09	14.4186	1629	ILMN_1714990
VENTX	-0.475515	7.14088	-7.02676	6.90492e-11	4.02154e-09	14.4084	27287	ILMN_1782352
LOC729926	-0.716834	10.6323	-7.02303	7.04507e-11	4.09555e-09	14.389	729926	ILMN_3229594
IL1R2	1.98231	9.07272	7.01922	7.19129e-11	4.1618e-09	14.369	7850	ILMN_1758371
LOC285900	-0.639292	12.6598	-7.01916	7.19363e-11	4.1618e-09	14.3687	285900	ILMN_1657612
ZC3H5	-0.473331	9.1369	-7.01902	7.19888e-11	4.1618e-09	14.368	85451	ILMN_1689119
LOC100130070	-0.82868	10.0369	-7.01511	7.35232e-11	4.24268e-09	14.3476	100130070	ILMN_3264073
LOC401640	-0.529897	7.85214	-7.0137	7.4083e-11	4.26455e-09	14.3402	401640	ILMN_3290385
ZNF434	-0.421708	8.32714	-7.0131	7.43218e-11	4.26455e-09	14.3371	54925	ILMN_1684591
DPF2	-0.292699	9.95926	-7.01305	7.43427e-11	4.26455e-09	14.3368	5977	ILMN_1734317
ZBTB3	-0.475429	7.60454	-7.01279	7.44465e-11	4.26455e-09	14.3355	79842	ILMN_1689189
RPL35A	-0.371078	13.7587	-7.0123	7.46443e-11	4.26807e-09	14.3329	6165	ILMN_1756360
LOC643531	-0.527071	13.2701	-7.01176	7.48586e-11	4.27253e-09	14.3301	643531	ILMN_3291098
LOC390345	-0.781179	12.8979	-7.01066	7.53047e-11	4.29014e-09	14.3244	390345	ILMN_3284584
TMEM14D	-0.757168	10.0467	-7.01032	7.5441e-11	4.29014e-09	14.3226	645203	ILMN_3244248
RPL31	-0.371859	13.424	-7.00662	7.69596e-11	4.36857e-09	14.3033	6160	ILMN_1754195
SERPINB1	0.946713	11.1049	7.00497	7.76454e-11	4.39953e-09	14.2947	1992	ILMN_1679133
CTSO	-0.515281	7.51938	-7.00278	7.85673e-11	4.44373e-09	14.2833	1519	ILMN_1769633
GOSR1	-0.26359	7.23476	-6.99887	8.02358e-11	4.52993e-09	14.2629	9527	ILMN_1798816
MATK	-0.856202	8.64681	-6.99738	8.08805e-11	4.55811e-09	14.2551	4145	ILMN_1669321
EPHB6	-0.557857	7.40381	-6.99535	8.17699e-11	4.59996e-09	14.2445	2051	ILMN_1802646
FLJ33590	0.774574	7.66768	6.99217	8.31818e-11	4.671e-09	14.228	285093	ILMN_1717029
RPS3	-0.438809	13.3609	-6.98972	8.42825e-11	4.72435e-09	14.2152	6188	ILMN_1760714
ZNF671	-0.391131	8.78863	-6.98507	8.64137e-11	4.82656e-09	14.191	79891	ILMN_1713454
C17orf62	0.538318	10.452	6.98507	8.64141e-11	4.82656e-09	14.191	79415	ILMN_1750401
TXN	0.579524	12.0976	6.98407	8.68802e-11	4.84396e-09	14.1858	7295	ILMN_1680314
HMHA1	-0.545211	10.2429	-6.98299	8.73886e-11	4.86365e-09	14.1801	23526	ILMN_1811392
C11orf80	-0.543664	7.53642	-6.98198	8.78619e-11	4.88132e-09	14.1749	79703	ILMN_1790637
FCGR1C	1.4386	9.64842	6.9722	9.26035e-11	5.13564e-09	14.124	100132417	ILMN_3247506
DNAJC5	0.447932	8.21539	6.96937	9.40213e-11	5.20506e-09	14.1092	80331	ILMN_1789642
TBK1	0.505568	9.24423	6.96893	9.42391e-11	5.20791e-09	14.107	29110	ILMN_1739967
LOC729423	-0.678127	8.39649	-6.96731	9.50644e-11	5.24427e-09	14.0986	729423	ILMN_3227811
ME2	0.409366	9.32119	6.96622	9.56199e-11	5.26565e-09	14.0929	4200	ILMN_1675186
GADD45B	0.741714	9.67515	6.95924	9.9273e-11	5.45723e-09	14.0566	4616	ILMN_1718977
TGFBI	-1.09264	10.1952	-6.95447	1.01843e-10	5.58868e-09	14.0318	7045	ILMN_1663866
C4orf34	-0.432111	10.2252	-6.95363	1.02301e-10	5.6036e-09	14.0275	201895	ILMN_1713892
RYK	-0.330379	7.80071	-6.953	1.0265e-10	5.6036e-09	14.0242	6259	ILMN_1658526
GDI1	0.520696	8.6372	6.953	1.02651e-10	5.6036e-09	14.0242	2664	ILMN_1734153
SNRPD3	-0.9573	8.04462	-6.95234	1.03015e-10	5.6137e-09	14.0207	6634	ILMN_1794599
BTF3L4	-0.359295	8.3401	-6.95071	1.03915e-10	5.65292e-09	14.0123	91408	ILMN_1759359
LRRFIP2	0.404106	8.25719	6.95036	1.04114e-10	5.65311e-09	14.0104	9209	ILMN_1707156
RNF144B	0.898773	8.97952	6.95006	1.0428e-10	5.65311e-09	14.0089	255488	ILMN_1752526
ATP8B2	-0.470839	8.36052	-6.94937	1.04665e-10	5.66238e-09	14.0053	57198	ILMN_1782057
GTPBP6	-0.613048	10.7202	-6.9489	1.04932e-10	5.66238e-09	14.0029	8225	ILMN_1776080
HIST1H2BK	0.557114	11.9808	6.94879	1.04993e-10	5.66238e-09	14.0023	85236	ILMN_1796179
PRICKLE4	-0.468346	11.1029	-6.94818	1.05335e-10	5.67105e-09	13.9991	29964	ILMN_1695868
FAM168B	-0.432386	8.03996	-6.94653	1.06273e-10	5.71176e-09	13.9906	130074	ILMN_1677122
LMNB1	0.84469	8.55795	6.94232	1.08694e-10	5.8319e-09	13.9687	4001	ILMN_2126706
LOC100131787	-0.707248	8.55703	-6.93743	1.1158e-10	5.9765e-09	13.9433	100131787	ILMN_3199974
ITPKB	-0.472962	9.16078	-6.93148	1.15193e-10	6.1595e-09	13.9125	3707	ILMN_1700432
PPIE	-0.384093	8.40188	-6.93088	1.15563e-10	6.16874e-09	13.9094	10450	ILMN_1674825
TMEM150A	-0.402972	8.22951	-6.92617	1.18519e-10	6.31579e-09	13.8849	129303	ILMN_2299612
SLC2A3	0.922552	12.714	6.92134	1.21619e-10	6.46996e-09	13.8599	6515	ILMN_1775708
LOC727818	-0.377883	7.24572	-6.9205	1.2217e-10	6.48829e-09	13.8555	727818	ILMN_3239188
FES	0.840118	10.3769	6.91695	1.24512e-10	6.60147e-09	13.8371	2242	ILMN_1693650
CD52	-0.639447	12.9469	-6.91244	1.27549e-10	6.75107e-09	13.8137	1043	ILMN_2208903
LOC100129890	-0.355294	7.63949	-6.91041	1.2894e-10	6.81316e-09	13.8032	100129890	ILMN_3270411
RPUSD2	-0.540674	8.915	-6.90774	1.30793e-10	6.89946e-09	13.7894	27079	ILMN_1730077
SLU7	0.560998	8.86445	6.90578	1.32175e-10	6.96063e-09	13.7792	10569	ILMN_1685369
CLEC1B	1.23538	9.14085	6.90502	1.3271e-10	6.97708e-09	13.7753	51266	ILMN_1745103
C6orf48	-0.691393	10.5391	-6.90278	1.34307e-10	7.04923e-09	13.7637	50854	ILMN_1766446
LOC651198	-0.518289	9.47358	-6.89807	1.37732e-10	7.2082e-09	13.7393	651198	ILMN_3205924
DDIT4	1.05708	10.0016	6.89798	1.37796e-10	7.2082e-09	13.7389	54541	ILMN_1661599
POLR1E	-0.458673	8.38427	-6.89503	1.39985e-10	7.31046e-09	13.7236	64425	ILMN_1678934
SLC25A42	-0.576311	8.78245	-6.89262	1.418e-10	7.39297e-09	13.7111	284439	ILMN_1763464
LOC347544	-0.620701	12.3528	-6.88383	1.48613e-10	7.73529e-09	13.6657	347544	ILMN_1801795
FCGR1B	1.48987	10.2391	6.88331	1.4902e-10	7.73675e-09	13.663	2210	ILMN_2261600
RAB24	0.829595	10.5273	6.88317	1.49135e-10	7.73675e-09	13.6623	53917	ILMN_1677843
LOC127295	-0.681623	11.8974	-6.88161	1.5038e-10	7.78844e-09	13.6542	127295	ILMN_1744347
SAMD9L	1.0151	9.84917	6.88069	1.51122e-10	7.81393e-09	13.6495	219285	ILMN_1799467
SERPINA1	0.804441	11.076	6.87528	1.55546e-10	8.02947e-09	13.6215	5265	ILMN_1764980
ANKRD33	0.761636	8.98311	6.87258	1.57799e-10	8.13234e-09	13.6076	341405	ILMN_1667748
REV1	-0.325425	7.90285	-6.86972	1.60225e-10	8.24385e-09	13.5928	51455	ILMN_1707062
QARS	-0.605032	11.6466	-6.86908	1.60777e-10	8.25867e-09	13.5895	5859	ILMN_1763080
IDI1	0.769131	8.65018	6.86724	1.62357e-10	8.32615e-09	13.58	3422	ILMN_1755075
KIAA1949	0.380424	12.251	6.86496	1.64345e-10	8.41047e-09	13.5682	170954	ILMN_1732967
TRIM41	0.30213	8.65919	6.86474	1.64538e-10	8.41047e-09	13.5671	90933	ILMN_1729495
RASGRP1	-0.768503	8.99047	-6.86259	1.66431e-10	8.48358e-09	13.556	10125	ILMN_1768958
PFKFB2	0.848168	7.49276	6.8625	1.66509e-10	8.48358e-09	13.5555	5208	ILMN_1723436
TXNDC12	-0.751149	9.92193	-6.86213	1.66842e-10	8.48676e-09	13.5536	51060	ILMN_1783753
S1PR1	-0.610042	8.691	-6.85545	1.72887e-10	8.77999e-09	13.5191	1901	ILMN_3235853
GPR141	0.655931	7.39688	6.85076	1.77252e-10	8.98707e-09	13.495	353345	ILMN_1656818
UBE2C	0.835543	8.08879	6.84883	1.7909e-10	9.06558e-09	13.485	11065	ILMN_1714730
SDHAF2	-0.446187	10.6682	-6.84083	1.86871e-10	9.44421e-09	13.4438	54949	ILMN_3238633
DUSP3	0.66807	10.275	6.84013	1.87575e-10	9.46455e-09	13.4401	1845	ILMN_1797522
SGK3	-0.299598	7.24509	-6.83643	1.91298e-10	9.61653e-09	13.4211	23678	ILMN_1729785
TPST2	0.441597	10.6354	6.8364	1.91327e-10	9.61653e-09	13.421	8459	ILMN_1695432
SLC16A3	0.871823	11.1408	6.83623	1.91508e-10	9.61653e-09	13.42	9123	ILMN_2364022
RPS14	-0.397031	13.582	-6.82667	2.0149e-10	1.01016e-08	13.3708	6208	ILMN_1666635
CNOT7	-0.339376	8.64528	-6.81983	2.08952e-10	1.0459e-08	13.3356	29883	ILMN_1656134
TNNC2	-0.531634	7.23329	-6.8181	2.10874e-10	1.05383e-08	13.3268	7125	ILMN_1693428
SLC9A8	0.593414	8.19302	6.81537	2.13954e-10	1.06752e-08	13.3127	23315	ILMN_1690625
SQRDL	0.766605	8.78655	6.81217	2.17625e-10	1.08411e-08	13.2962	58472	ILMN_1667199
SRPK2	-0.342828	7.63772	-6.81101	2.18963e-10	1.08904e-08	13.2903	6733	ILMN_1657451
CCDC12	-0.493428	9.9139	-6.80066	2.31332e-10	1.14874e-08	13.2371	151903	ILMN_1725071
PADI4	1.27038	11.5508	6.80005	2.3208e-10	1.15063e-08	13.234	23569	ILMN_1807529
NDRG2	-0.234214	7.16595	-6.79879	2.33643e-10	1.15655e-08	13.2275	57447	ILMN_1670535
HLA-DOB	-0.857756	8.91094	-6.79031	2.44379e-10	1.20496e-08	13.184	3112	ILMN_1700428
C19orf70	-0.533741	10.415	-6.7903	2.44395e-10	1.20496e-08	13.1839	125988	ILMN_1765684
ZFP36	0.622433	12.4134	6.79016	2.44575e-10	1.20496e-08	13.1832	7538	ILMN_1720829
BLCAP	-0.542515	8.97926	-6.78919	2.45844e-10	1.20931e-08	13.1782	10904	ILMN_1675612
CAPN5	-0.339804	7.26881	-6.78631	2.49621e-10	1.22596e-08	13.1634	726	ILMN_1737089
LOC648294	-0.483652	12.1395	-6.78504	2.513e-10	1.23227e-08	13.1569	648294	ILMN_3208056
EPHX2	-0.775934	8.10731	-6.78237	2.54885e-10	1.2479e-08	13.1432	2053	ILMN_1709237
ZNF277	-0.428526	8.75262	-6.78193	2.55482e-10	1.24887e-08	13.1409	11179	ILMN_1681628
XPO4	-0.407176	8.08509	-6.78161	2.55908e-10	1.249e-08	13.1393	64328	ILMN_1657873
KIAA2010	-0.289347	8.77981	-6.77642	2.63048e-10	1.28186e-08	13.1127	55671	ILMN_1678097
C3orf19	-0.305018	9.3251	-6.77599	2.63649e-10	1.28279e-08	13.1105	51244	ILMN_1750144
RBL2	-0.485901	10.5076	-6.77169	2.69712e-10	1.31026e-08	13.0885	5934	ILMN_1756999
LOC441246	-0.505021	13.1645	-6.76799	2.75049e-10	1.33412e-08	13.0695	441246	ILMN_1788742
HAVCR2	0.711173	10.3723	6.76225	2.83535e-10	1.37315e-08	13.0401	84868	ILMN_1693826
SUV420H1	-0.259208	7.87341	-6.7571	2.91362e-10	1.40888e-08	13.0137	51111	ILMN_1669598
TFB1M	-0.385872	8.22267	-6.75676	2.91888e-10	1.40925e-08	13.0119	51106	ILMN_1733562
LOC646483	-0.576328	12.1571	-6.75219	2.99019e-10	1.44084e-08	12.9886	646483	ILMN_1673738
HTATIP2	0.541387	9.71322	6.75198	2.99351e-10	1.44084e-08	12.9875	10553	ILMN_1664303
TSPO	0.680236	12.4818	6.75157	3.00014e-10	1.44181e-08	12.9854	706	ILMN_1681679
RETN	2.03884	9.17259	6.74677	3.07708e-10	1.47653e-08	12.9608	56729	ILMN_1675190
RABEP1	-0.53904	9.28835	-6.74615	3.08721e-10	1.47659e-08	12.9577	9135	ILMN_1719622
SDPR	-0.944958	9.90386	-6.74603	3.08921e-10	1.47659e-08	12.957	8436	ILMN_1715991
ERO1L	0.451032	8.37738	6.7459	3.09136e-10	1.47659e-08	12.9564	30001	ILMN_1744963
FARS2	-0.516616	8.16926	-6.74545	3.09874e-10	1.47787e-08	12.9541	10667	ILMN_1793732
C20orf24	0.612306	12.5594	6.74464	3.11206e-10	1.48196e-08	12.9499	55969	ILMN_1679195
LOC646294	-0.38852	13.3251	-6.74324	3.13511e-10	1.49067e-08	12.9428	646294	ILMN_3217815
TMEM106B	-0.325469	7.41958	-6.74289	3.14097e-10	1.4912e-08	12.941	54664	ILMN_1726288
ZBED5	-0.414673	9.54387	-6.74183	3.15852e-10	1.49533e-08	12.9356	58486	ILMN_1664424
HLA-DPA1	-0.717557	12.3747	-6.74163	3.16193e-10	1.49533e-08	12.9345	3113	ILMN_1772218
SIGLEC5	0.84449	7.85152	6.7415	3.16399e-10	1.49533e-08	12.9339	8778	ILMN_1652381
CD163	1.5214	8.80801	6.74105	3.17149e-10	1.49662e-08	12.9316	9332	ILMN_1722622
LOC388275	-0.953688	9.52645	-6.73984	3.19182e-10	1.50395e-08	12.9254	388275	ILMN_1676091
FLJ45032	0.229609	7.29871	6.73738	3.23372e-10	1.5214e-08	12.9128	643853	ILMN_1774211
KIAA1600	0.536404	9.10164	6.73676	3.24425e-10	1.52407e-08	12.9096	57700	ILMN_1752927
KLF13	-0.440973	11.3281	-6.73238	3.32015e-10	1.55739e-08	12.8872	51621	ILMN_1679929
SIK3	-0.388308	9.7417	-6.729	3.37991e-10	1.58305e-08	12.87	23387	ILMN_1732343
NOV	-0.388296	7.13399	-6.72846	3.38958e-10	1.58521e-08	12.8672	4856	ILMN_1787186
GNA15	0.696101	9.12813	6.728	3.39777e-10	1.58667e-08	12.8649	2769	ILMN_1773963
ADM	1.11673	11.6049	6.72708	3.41435e-10	1.59204e-08	12.8602	133	ILMN_1708934
LOC100130123	-0.366824	7.20454	-6.7263	3.42832e-10	1.59618e-08	12.8562	100130123	ILMN_3238283
TATDN2	-0.372059	9.10769	-6.72586	3.43637e-10	1.59755e-08	12.8539	9797	ILMN_1734138
RPL24	-0.353094	13.2011	-6.72263	3.49546e-10	1.62056e-08	12.8374	6152	ILMN_2160388
MGC15763	-0.712953	8.21314	-6.72259	3.49619e-10	1.62056e-08	12.8372	92106	ILMN_1764770
RHBDF2	0.516944	9.92123	6.72229	3.50164e-10	1.62069e-08	12.8357	79651	ILMN_1691717
ETNK1	0.195331	7.15994	6.7133	3.67163e-10	1.69686e-08	12.7898	55500	ILMN_1686937
LOC100132742	-0.480961	12.7263	-6.71258	3.68563e-10	1.70082e-08	12.7862	100132742	ILMN_3202734
CD97	0.539536	12.0186	6.70877	3.76046e-10	1.7328e-08	12.7667	976	ILMN_1673363
RFX7	-0.576594	8.79358	-6.70672	3.8012e-10	1.74757e-08	12.7563	64864	ILMN_3245625
EIF3G	-0.504115	11.6007	-6.7066	3.80366e-10	1.74757e-08	12.7556	8666	ILMN_1689446
CAMK1D	-0.472718	8.03739	-6.7005	3.92781e-10	1.80196e-08	12.7246	57118	ILMN_1705477
TTC27	-0.56698	7.72824	-6.69987	3.94097e-10	1.80536e-08	12.7213	55622	ILMN_1757730
CXCL16	0.936095	9.50587	6.69906	3.95774e-10	1.81039e-08	12.7172	58191	ILMN_1672278
UBE2E2	-0.46258	8.8831	-6.69846	3.97025e-10	1.81347e-08	12.7142	7325	ILMN_1707475
LOC731640	-0.753154	11.7634	-6.69791	3.98178e-10	1.81608e-08	12.7113	731640	ILMN_1661174
LOC648622	-0.678827	12.2232	-6.69701	4.00078e-10	1.8221e-08	12.7067	648622	ILMN_1652955
WDR74	-0.334425	8.3174	-6.69628	4.01602e-10	1.82638e-08	12.7031	54663	ILMN_1789775
LOC728481	-0.685295	12.939	-6.69525	4.03786e-10	1.83366e-08	12.6978	728481	ILMN_1700674
WSB1	0.650673	9.34929	6.69329	4.07979e-10	1.84795e-08	12.6878	26118	ILMN_1664802
SLC25A26	-0.292625	7.27926	-6.69297	4.08675e-10	1.84795e-08	12.6862	115286	ILMN_1659894
ATM	-0.539009	9.17547	-6.69295	4.08703e-10	1.84795e-08	12.6861	472	ILMN_1713630
ZC3H12A	0.803076	8.25913	6.68878	4.17784e-10	1.88629e-08	12.6648	80149	ILMN_1672295
RASA3	-0.50255	8.10757	-6.68823	4.1899e-10	1.88901e-08	12.662	22821	ILMN_1654586
LOC730415	-0.69814	11.5269	-6.68618	4.23524e-10	1.90671e-08	12.6516	730415	ILMN_3228688
PRC1	0.800169	7.87339	6.68457	4.27134e-10	1.92009e-08	12.6434	9055	ILMN_1728934
SKAP1	-0.814247	9.28452	-6.68431	4.27721e-10	1.92009e-08	12.6421	8631	ILMN_1751400
BTLA	-0.585992	8.24603	-6.67978	4.38031e-10	1.96356e-08	12.619	151888	ILMN_1778536
C1orf91	0.234984	7.35638	6.67837	4.41287e-10	1.97533e-08	12.6119	56063	ILMN_1673752
RPAIN	-0.517195	9.48517	-6.67507	4.49018e-10	2.00706e-08	12.595	84268	ILMN_1770339
C9orf127	-0.437424	7.28142	-6.67321	4.53426e-10	2.02388e-08	12.5856	51754	ILMN_1708029
TC2N	-0.569485	7.40936	-6.67223	4.55773e-10	2.03147e-08	12.5806	123036	ILMN_1734596
TNFAIP3	0.947721	9.1408	6.67178	4.5684e-10	2.03333e-08	12.5783	7128	ILMN_1702691
RSL24D1	-0.5472	10.4723	-6.67006	4.60999e-10	2.04893e-08	12.5696	51187	ILMN_2175465
FAM13B	-0.393238	9.12182	-6.66816	4.65621e-10	2.06654e-08	12.5599	51306	ILMN_3258795
FLVCR2	0.545992	9.11386	6.66777	4.66571e-10	2.0673e-08	12.5579	55640	ILMN_2204876
ZBTB24	-0.384242	8.20856	-6.66755	4.67113e-10	2.0673e-08	12.5568	9841	ILMN_1659937
ABCB7	-0.367544	7.71085	-6.66617	4.70505e-10	2.07938e-08	12.5498	22	ILMN_1687840
GPR97	1.12669	8.21318	6.66554	4.72072e-10	2.08337e-08	12.5466	222487	ILMN_1731161
QSOX1	0.713375	8.77428	6.66453	4.74576e-10	2.09147e-08	12.5415	5768	ILMN_1758229
JUNB	0.885424	9.50596	6.66355	4.77018e-10	2.09928e-08	12.5365	3726	ILMN_2086077
PAOX	-0.350187	7.48359	-6.66246	4.79767e-10	2.10842e-08	12.5309	196743	ILMN_1765116
CLEC4D	1.35651	8.35008	6.66118	4.83006e-10	2.11807e-08	12.5244	338339	ILMN_1808979
LYRM2	-0.537887	8.65543	-6.66106	4.83315e-10	2.11807e-08	12.5238	57226	ILMN_1703132
RNF125	-0.707895	8.75788	-6.66015	4.85632e-10	2.12525e-08	12.5192	54941	ILMN_1747192
SAP30L	0.386093	9.60381	6.6588	4.89079e-10	2.13735e-08	12.5123	79685	ILMN_1757781
NUBP1	-0.492243	8.28029	-6.65597	4.96394e-10	2.1663e-08	12.498	4682	ILMN_1689342
PDCD1	0.81966	7.42518	6.6556	4.97364e-10	2.16751e-08	12.4961	5133	ILMN_1806725
LOC729102	-0.790962	11.6397	-6.65495	4.99049e-10	2.17183e-08	12.4928	729102	ILMN_3304022
DGCR6L	-0.539466	8.68002	-6.65447	5.00321e-10	2.17435e-08	12.4903	85359	ILMN_3245688
LSM14A	-0.46626	10.0689	-6.65294	5.04361e-10	2.18887e-08	12.4826	26065	ILMN_2079803
GALC	0.335451	8.19259	6.65263	5.05163e-10	2.18932e-08	12.481	2581	ILMN_1799744
C8orf55	-0.728096	9.06463	-6.64984	5.12617e-10	2.21856e-08	12.4669	51337	ILMN_1777740
CDC2L5	-0.335936	8.37407	-6.64794	5.17757e-10	2.23771e-08	12.4572	8621	ILMN_1778557
ZFAND1	-0.268872	7.8772	-6.6441	5.28278e-10	2.28004e-08	12.4377	79752	ILMN_1730907
ACTN4	0.463702	9.80802	6.63824	5.44763e-10	2.34795e-08	12.408	81	ILMN_1725534
RIT1	0.594473	8.46569	6.63552	5.52593e-10	2.37843e-08	12.3942	6016	ILMN_1656335
KLHL2	0.655098	8.0316	6.63349	5.58497e-10	2.40054e-08	12.3839	11275	ILMN_1701837
DUSP1	1.02226	11.6327	6.63079	5.66464e-10	2.43145e-08	12.3702	1843	ILMN_1781285
C20orf11	-0.49694	9.54562	-6.62876	5.72519e-10	2.45408e-08	12.3599	54994	ILMN_1755909
GEMIN4	-0.551105	9.08519	-6.62722	5.77137e-10	2.47049e-08	12.3521	50628	ILMN_1770206
BATF	0.796042	9.14457	6.62173	5.93985e-10	2.53914e-08	12.3243	10538	ILMN_1668822
NLRC3	-0.490229	7.9965	-6.62033	5.98359e-10	2.55436e-08	12.3172	197358	ILMN_3234784
NVL	-0.257838	7.63312	-6.61982	5.99959e-10	2.5557e-08	12.3146	4931	ILMN_1712636
MS4A4A	0.385158	6.84606	6.61971	6.00305e-10	2.5557e-08	12.3141	51338	ILMN_1711550
PFDN5	-0.428237	12.4484	-6.61861	6.0375e-10	2.56688e-08	12.3085	5204	ILMN_1755536
LHFPL2	0.791229	8.81656	6.61687	6.09295e-10	2.58694e-08	12.2997	10184	ILMN_1747744
SF3A1	-0.291607	7.51027	-6.61397	6.18596e-10	2.61932e-08	12.285	10291	ILMN_1655809
NOSIP	-0.548737	11.8893	-6.6138	6.19152e-10	2.61932e-08	12.2841	51070	ILMN_1759436
WDR7	-0.343256	8.11959	-6.61371	6.19429e-10	2.61932e-08	12.2837	23335	ILMN_1689029
MED22	-0.36624	9.37854	-6.61192	6.25273e-10	2.64047e-08	12.2746	6837	ILMN_1697218
LRPPRC	-0.383957	8.40029	-6.60937	6.33665e-10	2.67231e-08	12.2617	10128	ILMN_1662417
GPD1L	-0.486924	8.58665	-6.60903	6.34799e-10	2.67349e-08	12.26	23171	ILMN_1694106
STX11	0.926184	11.0193	6.60756	6.39678e-10	2.69043e-08	12.2526	8676	ILMN_1720771
ZNF800	-0.471501	8.36503	-6.60624	6.44127e-10	2.7055e-08	12.2459	168850	ILMN_1688346
GPR18	-0.731995	9.17656	-6.60167	6.59682e-10	2.76713e-08	12.2228	2841	ILMN_1780368
CEBPZ	-0.462629	9.54109	-6.6009	6.62351e-10	2.77461e-08	12.2189	10153	ILMN_1744147
LOC645157	-0.889069	10.5456	-6.59637	6.78221e-10	2.8373e-08	12.196	645157	ILMN_3290100
SYNJ2BP	-0.535565	7.81499	-6.59377	6.875e-10	2.86896e-08	12.1828	55333	ILMN_1697793
C11orf82	0.563088	7.83213	6.59374	6.87621e-10	2.86896e-08	12.1827	220042	ILMN_1790100
CAP1	0.409963	13.0844	6.59222	6.93082e-10	2.8879e-08	12.175	10487	ILMN_1797604
ANAPC1	-0.285727	8.15477	-6.59138	6.9613e-10	2.89675e-08	12.1708	64682	ILMN_1659553
LOC645173	-0.63036	12.7282	-6.58774	7.09503e-10	2.94848e-08	12.1524	645173	ILMN_3211132
HLA-DRB6	-0.944444	11.1492	-6.58171	7.32169e-10	3.03864e-08	12.1219	3128	ILMN_2066060
SHKBP1	0.571327	9.26582	6.57974	7.39759e-10	3.06608e-08	12.112	92799	ILMN_1765493
WHAMM	-0.388197	7.49552	-6.57535	7.56886e-10	3.13293e-08	12.0898	123720	ILMN_1763364
DOCK2	-0.381129	11.3994	-6.57399	7.62263e-10	3.15102e-08	12.083	1794	ILMN_1799725
HIST2H2AC	1.03542	10.8481	6.57281	7.66997e-10	3.16642e-08	12.077	8338	ILMN_1768973
STK3	0.662287	7.84643	6.56884	7.83042e-10	3.22701e-08	12.057	6788	ILMN_1666453
MGMT	-0.58988	8.40986	-6.56867	7.83735e-10	3.22701e-08	12.0561	4255	ILMN_1795639
KIAA0182	-0.466731	8.81082	-6.56473	7.99992e-10	3.28963e-08	12.0363	23199	ILMN_1807767
GNB2	0.486192	9.00595	6.56381	8.03829e-10	3.30107e-08	12.0316	2783	ILMN_1658928
HP	1.60481	8.12104	6.55714	8.32258e-10	3.41335e-08	11.998	3240	ILMN_1812433
RPS4X	-0.690828	12.8147	-6.55629	8.35954e-10	3.42402e-08	11.9937	6191	ILMN_1810577
SMCR7L	-0.45201	8.7222	-6.55467	8.43027e-10	3.44849e-08	11.9856	54471	ILMN_1793203
RGS10	-0.674461	10.7075	-6.55377	8.46977e-10	3.46013e-08	11.981	6001	ILMN_1668559
GOLPH3	0.3475	9.68005	6.55237	8.53198e-10	3.481e-08	11.974	64083	ILMN_1708841
CRBN	-0.345754	9.26232	-6.55007	8.63448e-10	3.51638e-08	11.9624	51185	ILMN_1668582
MRPS16	-0.514729	8.47832	-6.54992	8.64113e-10	3.51638e-08	11.9617	51021	ILMN_1775744
LOC100129982	-0.349901	7.4545	-6.54912	8.67763e-10	3.52665e-08	11.9576	100129982	ILMN_3187479
FAM190B	-0.505427	8.45162	-6.54337	8.94119e-10	3.62906e-08	11.9287	54462	ILMN_2129388
IL23A	-0.397874	7.37442	-6.54298	8.9591e-10	3.63162e-08	11.9267	51561	ILMN_1715603
SOCS1	1.0688	8.53304	6.53871	9.16019e-10	3.70834e-08	11.9053	8651	ILMN_1774733
UNC84B	-0.483564	12.916	-6.53708	9.23819e-10	3.73509e-08	11.8971	25777	ILMN_2099301
CD6	-0.893798	10.5235	-6.53629	9.27643e-10	3.74572e-08	11.8931	923	ILMN_1746565
OLIG2	-0.836132	7.30717	-6.53475	9.3508e-10	3.77089e-08	11.8853	10215	ILMN_1727567
FLJ43681	-0.794429	11.1755	-6.53369	9.40275e-10	3.78696e-08	11.88	388574	ILMN_3235148
CLEC16A	-0.375784	9.22085	-6.53229	9.47114e-10	3.80961e-08	11.873	23274	ILMN_1781752
TBC1D8	0.788644	8.21122	6.52916	9.62675e-10	3.86724e-08	11.8572	11138	ILMN_1735495
TADA2B	-0.372812	8.80127	-6.52788	9.69087e-10	3.88801e-08	11.8508	93624	ILMN_3239378
LOC650152	0.274775	13.175	6.52669	9.75097e-10	3.90712e-08	11.8448	650152	ILMN_1660775
B3GNT8	0.700043	7.99528	6.52569	9.80181e-10	3.92184e-08	11.8398	374907	ILMN_1741389
LRIG2	-0.362828	7.33971	-6.52548	9.81274e-10	3.92184e-08	11.8387	9860	ILMN_1654099
LOC728244	-0.513924	12.7305	-6.52435	9.87055e-10	3.93601e-08	11.833	728244	ILMN_3238782
ZNF142	-0.320683	8.85824	-6.52429	9.87331e-10	3.93601e-08	11.8328	7701	ILMN_1676745
OXA1L	-0.453126	10.1053	-6.52292	9.9438e-10	3.95907e-08	11.8259	5018	ILMN_1731851
MAN1C1	-0.580537	7.57236	-6.51501	1.03612e-09	4.12002e-08	11.7861	57134	ILMN_1713807
LOC654194	-0.921444	11.9829	-6.51324	1.04567e-09	4.15273e-08	11.7772	654194	ILMN_1755808
C2	0.472006	7.529	6.50987	1.06411e-09	4.2206e-08	11.7603	717	ILMN_1710740
TLN1	0.606673	9.93556	6.5091	1.06837e-09	4.23214e-08	11.7565	7094	ILMN_1696643
RPS10P3	-0.415082	7.7832	-6.50308	1.10228e-09	4.36095e-08	11.7263	158104	ILMN_3225669
TRAFD1	0.813847	9.44345	6.50237	1.10632e-09	4.37144e-08	11.7227	10906	ILMN_1758250
LOC645387	-0.418564	13.032	-6.5005	1.11709e-09	4.40841e-08	11.7134	645387	ILMN_3218820
TSEN54	-0.495171	7.73096	-6.49445	1.15269e-09	4.54317e-08	11.683	283989	ILMN_1657509
AHCTF1	-0.387209	7.74687	-6.49421	1.15413e-09	4.54317e-08	11.6818	25909	ILMN_1666679
PLIN2	0.603049	9.40388	6.4924	1.16499e-09	4.58014e-08	11.6728	123	ILMN_1801077
NCR3	-0.634584	7.61755	-6.48866	1.1878e-09	4.66399e-08	11.654	259197	ILMN_2044471
TYW3	-0.440416	7.51018	-6.48836	1.18966e-09	4.66544e-08	11.6525	127253	ILMN_1726842
ZDHHC19	1.44695	8.09652	6.48728	1.19634e-09	4.68577e-08	11.6471	131540	ILMN_1766896
IL10RB	0.579479	11.017	6.48671	1.19985e-09	4.68823e-08	11.6442	3588	ILMN_1767360
CCDC65	-0.290876	7.22964	-6.4867	1.19996e-09	4.68823e-08	11.6442	85478	ILMN_2227195
FLJ23834	-0.273063	6.71563	-6.48568	1.20631e-09	4.70034e-08	11.639	222256	ILMN_1809817
C6orf204	-0.38093	7.08465	-6.48561	1.20674e-09	4.70034e-08	11.6387	387119	ILMN_1793559
RBM12B	-0.549731	7.61666	-6.48548	1.20756e-09	4.70034e-08	11.638	389677	ILMN_1805778
LOC440487	-0.385557	7.60039	-6.48383	1.2179e-09	4.73472e-08	11.6298	440487	ILMN_3278132
PQBP1	-0.342016	8.21319	-6.48278	1.22456e-09	4.75156e-08	11.6245	10084	ILMN_1692429
LOC649946	-0.730159	9.30045	-6.48267	1.22527e-09	4.75156e-08	11.624	649946	ILMN_1673317
FCRLA	-0.96268	10.2934	-6.47966	1.24446e-09	4.82001e-08	11.6089	84824	ILMN_1691071
VIM	0.45853	12.8835	6.47938	1.24627e-09	4.82107e-08	11.6075	7431	ILMN_1782538
ESRP2	-0.248006	6.79403	-6.47876	1.25029e-09	4.82498e-08	11.6044	80004	ILMN_1729640
ATP5G2	-0.43227	10.6342	-6.47875	1.25036e-09	4.82498e-08	11.6044	517	ILMN_1660577
DNAJA3	-0.406326	9.68474	-6.47811	1.25449e-09	4.83319e-08	11.6012	9093	ILMN_1662334
LOC729617	-0.418972	13.4048	-6.47766	1.25741e-09	4.83319e-08	11.5989	729617	ILMN_3245000
TMEM203	-0.413629	9.79296	-6.47754	1.25822e-09	4.83319e-08	11.5983	94107	ILMN_2073010
ATP6V1B2	0.467053	12.1298	6.47747	1.25866e-09	4.83319e-08	11.598	526	ILMN_1787705
LOC391045	0.852464	7.79987	6.47492	1.27538e-09	4.89141e-08	11.5852	391045	ILMN_1806015
EEF2K	-0.346077	7.90994	-6.47463	1.27729e-09	4.89275e-08	11.5838	29904	ILMN_1789171
LIME1	-0.785974	11.3813	-6.47251	1.2914e-09	4.9386e-08	11.5732	54923	ILMN_2183687
TNFRSF21	-0.41073	7.35961	-6.47236	1.29241e-09	4.9386e-08	11.5724	27242	ILMN_1699695
CCR7	-0.781506	11.6299	-6.47135	1.29919e-09	4.95843e-08	11.5673	1236	ILMN_1715131
APEX1	-0.527395	10.1476	-6.47003	1.30805e-09	4.98617e-08	11.5608	328	ILMN_1661886
MMADHC	0.49287	9.69041	6.46776	1.3235e-09	5.03894e-08	11.5494	27249	ILMN_3248966
CPA3	-0.41026	7.27118	-6.46665	1.33111e-09	5.06178e-08	11.5439	1359	ILMN_1766551
SERGEF	-0.337379	8.52874	-6.46617	1.33444e-09	5.06827e-08	11.5415	26297	ILMN_1760049
GNS	0.486759	12.3144	6.46353	1.35277e-09	5.13102e-08	11.5283	2799	ILMN_1744517
OGG1	-0.351314	7.86379	-6.46332	1.35423e-09	5.13102e-08	11.5272	4968	ILMN_1706652
GGA2	-0.591451	8.82535	-6.45774	1.39389e-09	5.27489e-08	11.4993	23062	ILMN_1686152
BRSK1	0.905975	9.01139	6.45695	1.39958e-09	5.29003e-08	11.4954	84446	ILMN_2185845
LOC642250	-0.332053	12.7563	-6.45256	1.43169e-09	5.40489e-08	11.4735	642250	ILMN_1663416
FAM44B	-0.457056	8.08089	-6.45166	1.43836e-09	5.42353e-08	11.469	91272	ILMN_1716730
PKNOX1	-0.276293	7.56507	-6.44786	1.46686e-09	5.52436e-08	11.45	5316	ILMN_1745365
LOC728069	0.670178	10.1293	6.4476	1.46883e-09	5.52514e-08	11.4487	728069	ILMN_1668743
MIR1974	-1.3826	9.16327	-6.44497	1.48897e-09	5.59417e-08	11.4355	100302207	ILMN_3308961
NT5DC1	-0.282426	7.54604	-6.44272	1.50629e-09	5.65247e-08	11.4243	221294	ILMN_1680673
TCN1	1.39136	8.45242	6.44118	1.51838e-09	5.69102e-08	11.4166	6947	ILMN_1768469
INSL3	0.571197	7.28665	6.43983	1.52896e-09	5.72382e-08	11.4099	3640	ILMN_2226271
YY1	-0.404534	10.142	-6.43601	1.55942e-09	5.83088e-08	11.3908	7528	ILMN_1770892
RPS5	-0.486645	13.0968	-6.43531	1.56504e-09	5.84494e-08	11.3874	6193	ILMN_1707810
C21orf33	-0.367062	9.48415	-6.43489	1.56844e-09	5.85067e-08	11.3853	8209	ILMN_1682812
GSTO1	0.502632	11.579	6.43449	1.57168e-09	5.85188e-08	11.3833	9446	ILMN_1808196
KLHL29	-0.214096	7.10867	-6.43439	1.5725e-09	5.85188e-08	11.3828	114818	ILMN_3178406
METRNL	0.633572	8.56943	6.43343	1.58029e-09	5.86755e-08	11.378	284207	ILMN_1688775
ACTR10	0.327367	9.49464	6.43341	1.58046e-09	5.86755e-08	11.3779	55860	ILMN_1798254
PDK3	0.485251	8.47679	6.42975	1.61055e-09	5.9706e-08	11.3597	5165	ILMN_1776582
ZNF252	-0.388824	8.38299	-6.42957	1.61203e-09	5.9706e-08	11.3588	286101	ILMN_3243961
RPP21	-0.435407	10.6735	-6.42549	1.64636e-09	6.09057e-08	11.3384	79897	ILMN_2186597
FBLN5	-0.413358	7.69849	-6.42479	1.65225e-09	6.10465e-08	11.3349	10516	ILMN_1664176
STIM2	-0.262243	7.60676	-6.42458	1.65407e-09	6.10465e-08	11.3339	57620	ILMN_1738449
SIT1	-0.440327	8.23714	-6.42352	1.66308e-09	6.13071e-08	11.3286	27240	ILMN_1788531
HLA-DQA1	-1.00466	10.8816	-6.41854	1.70636e-09	6.28284e-08	11.3038	3117	ILMN_1808405
CTDSP2	-0.374638	11.1017	-6.41821	1.70929e-09	6.28315e-08	11.3021	10106	ILMN_1692962
SIN3A	-0.466428	9.3259	-6.41807	1.71045e-09	6.28315e-08	11.3015	25942	ILMN_1805996
FKBP1A	0.546229	10.3998	6.4169	1.72084e-09	6.31389e-08	11.2956	2280	ILMN_1683658
ZNF827	-0.510994	7.64962	-6.4156	1.73238e-09	6.34881e-08	11.2892	152485	ILMN_1727574
CLIP1	0.269962	8.0976	6.41412	1.7456e-09	6.3898e-08	11.2818	6249	ILMN_1684038
ALKBH8	-0.316269	6.90014	-6.41142	1.77007e-09	6.47182e-08	11.2684	91801	ILMN_1779190
LOC100129657	-0.663791	8.57022	-6.41081	1.77565e-09	6.48463e-08	11.2653	100129657	ILMN_3193623
VRK3	-0.407608	9.04591	-6.40999	1.78311e-09	6.49755e-08	11.2613	51231	ILMN_1771697
LOC388621	-0.663139	10.9919	-6.40997	1.78333e-09	6.49755e-08	11.2612	388621	ILMN_1677262
CD302	-0.529139	8.12752	-6.40907	1.79159e-09	6.52007e-08	11.2567	9936	ILMN_1716797
PLEKHO2	0.598923	9.32606	6.40724	1.80859e-09	6.5743e-08	11.2476	80301	ILMN_1689968
C20orf30	-0.348684	10.6884	-6.40661	1.81444e-09	6.58793e-08	11.2444	29058	ILMN_1806312
TYSND1	-0.386842	8.27484	-6.4047	1.83241e-09	6.64494e-08	11.2349	219743	ILMN_1775677
LOC653171	0.437794	8.39787	6.40449	1.83439e-09	6.64494e-08	11.2339	653171	ILMN_1715702
MYOF	1.0376	8.64845	6.40378	1.84109e-09	6.66151e-08	11.2304	26509	ILMN_3302919
OXR1	-0.492135	8.65224	-6.40297	1.84874e-09	6.6815e-08	11.2263	55074	ILMN_1737462
TRAPPC2P1	-0.456013	7.5697	-6.40229	1.8552e-09	6.69708e-08	11.223	10597	ILMN_2211122
TEX10	-0.456652	8.04882	-6.40123	1.8654e-09	6.72618e-08	11.2177	54881	ILMN_1653529
CYB561D1	-0.323598	9.36587	-6.40078	1.86974e-09	6.73165e-08	11.2154	284613	ILMN_3180557
TMED3	-0.570012	10.2006	-6.40062	1.87121e-09	6.73165e-08	11.2147	23423	ILMN_1719316
CLEC4C	-0.421152	7.35348	-6.3982	1.89464e-09	6.80811e-08	11.2026	170482	ILMN_1665457
HEATR1	-0.556369	8.68464	-6.39412	1.93488e-09	6.94474e-08	11.1823	55127	ILMN_1787762
TMEM50B	-0.365615	8.57674	-6.39172	1.95886e-09	7.02277e-08	11.1704	757	ILMN_1757391
SPRYD3	-0.606949	8.98795	-6.38998	1.97646e-09	7.07777e-08	11.1618	84926	ILMN_1788095
LOC650761	-0.414537	7.40555	-6.3897	1.97935e-09	7.08e-08	11.1604	650761	ILMN_1694127
HDC	-0.58803	7.47014	-6.38914	1.98503e-09	7.09225e-08	11.1576	3067	ILMN_1792323
DNASE1L3	-0.342725	6.78714	-6.38828	1.99384e-09	7.10866e-08	11.1533	1776	ILMN_2049184
FAM129C	-0.609069	8.20415	-6.38824	1.99416e-09	7.10866e-08	11.1532	199786	ILMN_1664063
CTSA	0.641529	10.1217	6.38733	2.00353e-09	7.13392e-08	11.1486	5476	ILMN_1719286
LYRM7	-0.398831	7.96391	-6.38706	2.00635e-09	7.13586e-08	11.1473	90624	ILMN_3238623
ERI1	0.618259	8.25085	6.38618	2.01538e-09	7.15986e-08	11.1429	90459	ILMN_3245659
CD5	-0.715266	8.51979	-6.38397	2.03839e-09	7.23342e-08	11.132	921	ILMN_1753112
MGC16121	0.402398	7.36766	6.38099	2.06987e-09	7.33678e-08	11.1172	84848	ILMN_1673409
LOC645018	-0.423084	8.03521	-6.3787	2.09441e-09	7.41538e-08	11.1058	645018	ILMN_1760089
C8orf40	-0.521195	8.7995	-6.37746	2.10771e-09	7.4484e-08	11.0997	114926	ILMN_1677385
CCM2	-0.404203	10.3365	-6.37739	2.10849e-09	7.4484e-08	11.0993	83605	ILMN_1652198
PFKFB3	1.12337	10.0226	6.37614	2.12202e-09	7.48778e-08	11.0931	5209	ILMN_1660847
ZFP161	-0.353762	8.64943	-6.37546	2.12945e-09	7.50555e-08	11.0897	7541	ILMN_1772522
TRIM21	0.641519	9.56835	6.37517	2.13268e-09	7.50847e-08	11.0883	6737	ILMN_1678054
DOPEY2	-0.461837	8.84915	-6.3747	2.13784e-09	7.5182e-08	11.0859	9980	ILMN_1741711
EXOSC10	-0.361174	9.09654	-6.37046	2.18486e-09	7.67493e-08	11.0649	5394	ILMN_1670796
NUDT16L1	-0.365286	8.99056	-6.3685	2.20689e-09	7.74366e-08	11.0552	84309	ILMN_1735415
TIMP1	0.746388	12.2392	6.36619	2.23326e-09	7.82742e-08	11.0437	7076	ILMN_1711566
LOC151162	-0.500125	9.98031	-6.36248	2.27616e-09	7.96885e-08	11.0254	151162	ILMN_3238058
EIF3F	-0.528024	11.8558	-6.36161	2.2863e-09	7.99543e-08	11.0211	8665	ILMN_1694398
LOC100133224	-0.163979	7.12541	-6.36136	2.28918e-09	7.99657e-08	11.0199	100133224	ILMN_3216382
EEF1B2	-0.449516	11.3383	-6.35922	2.31444e-09	8.07578e-08	11.0093	1933	ILMN_1675541
ABLIM1	-0.687805	9.55364	-6.35594	2.35367e-09	8.20354e-08	10.993	3983	ILMN_1696682
SRPK1	0.608712	9.06986	6.35497	2.36543e-09	8.23537e-08	10.9882	6732	ILMN_1798804
ACOT9	0.484937	8.68157	6.35381	2.3795e-09	8.27518e-08	10.9825	23597	ILMN_1658995
SUSD3	-0.640504	9.38003	-6.35341	2.38444e-09	8.28316e-08	10.9805	203328	ILMN_1785570
IRAK2	0.778414	8.36487	6.35239	2.39692e-09	8.30846e-08	10.9754	3656	ILMN_1745964
HNRNPA0	-0.404677	9.47527	-6.35238	2.39703e-09	8.30846e-08	10.9754	10949	ILMN_1753279
LOC732229	2.54231	7.94807	6.34851	2.44505e-09	8.46555e-08	10.9562	732229	ILMN_3299604
LOC647597	0.289833	7.422	6.34807	2.45058e-09	8.47533e-08	10.954	647597	ILMN_3208881
MPPE1	-0.587603	9.13083	-6.34634	2.4724e-09	8.54137e-08	10.9455	65258	ILMN_1667744
LOC729903	-0.438039	13.7153	-6.34161	2.53296e-09	8.74093e-08	10.9221	729903	ILMN_3224952
SUCLG2	-0.479271	8.65511	-6.341	2.54092e-09	8.75877e-08	10.919	8801	ILMN_1652379
IL10RA	-0.503717	9.62626	-6.33384	2.63571e-09	9.07554e-08	10.8837	3587	ILMN_1652825
CD247	-0.738292	12.054	-6.33352	2.64007e-09	9.08057e-08	10.8821	919	ILMN_1676924
CRISPLD2	1.02876	9.92066	6.33146	2.66791e-09	9.16626e-08	10.8719	83716	ILMN_1790689
DHCR7	0.459496	7.63177	6.3293	2.69755e-09	9.25793e-08	10.8613	1717	ILMN_1815626
TIMM22	-0.544377	8.93977	-6.32896	2.70232e-09	9.26418e-08	10.8596	29928	ILMN_1706959
ABHD10	-0.472677	7.86516	-6.32768	2.72002e-09	9.31465e-08	10.8532	55347	ILMN_1770031
LOC651816	0.70282	8.82572	6.31645	2.88063e-09	9.8539e-08	10.7978	651816	ILMN_1729115
EIF2A	-0.472647	9.48849	-6.31475	2.90589e-09	9.92945e-08	10.7894	83939	ILMN_1733305
SPINK2	-0.28191	7.17906	-6.31262	2.93759e-09	1.00163e-07	10.7789	6691	ILMN_1763516
NFE2L2	0.62649	9.27459	6.31229	2.94248e-09	1.00163e-07	10.7773	4780	ILMN_1790909
LOC284023	-0.334336	7.56672	-6.31224	2.94326e-09	1.00163e-07	10.7771	284023	ILMN_1739325
DGUOK	-0.280014	9.80536	-6.31219	2.94409e-09	1.00163e-07	10.7768	1716	ILMN_1658481
PARP9	0.744548	10.2862	6.31062	2.96781e-09	1.00797e-07	10.769	83666	ILMN_1731224
MGC40489	0.217534	7.459	6.31053	2.96916e-09	1.00797e-07	10.7686	146880	ILMN_1659110
C12orf47	-0.564185	9.48471	-6.30466	3.05943e-09	1.03749e-07	10.7397	51275	ILMN_1798957
TNFRSF18	0.363801	7.12839	6.30437	3.06394e-09	1.0379e-07	10.7382	8784	ILMN_1743100
GNG7	-0.608331	8.75094	-6.30201	3.10105e-09	1.04933e-07	10.7266	2788	ILMN_1728107
LOC441154	-0.473064	8.047	-6.30013	3.13094e-09	1.05831e-07	10.7173	441154	ILMN_3200597
MRPL43	-0.329368	8.87909	-6.29863	3.15498e-09	1.06528e-07	10.71	84545	ILMN_1652147
ZNF26	-0.266057	7.80075	-6.29387	3.23243e-09	1.09026e-07	10.6865	7574	ILMN_1691798
TMEM156	-0.503538	8.81913	-6.29307	3.24574e-09	1.09357e-07	10.6826	80008	ILMN_1810374
RPL13	-0.678293	9.85969	-6.29099	3.28037e-09	1.102e-07	10.6723	6137	ILMN_1709039
LCN1L1	-0.249166	7.23538	-6.29093	3.28122e-09	1.102e-07	10.6721	286310	ILMN_3245845
FLJ42627	-0.282144	7.31274	-6.29079	3.28362e-09	1.102e-07	10.6714	645644	ILMN_3238221
MERTK	0.441548	7.23833	6.29072	3.28482e-09	1.102e-07	10.671	10461	ILMN_1770610
C5orf5	-0.306095	8.53474	-6.28844	3.32326e-09	1.1137e-07	10.6598	51306	ILMN_1673478
WBP2	0.548662	12.8796	6.28782	3.33366e-09	1.11599e-07	10.6568	23558	ILMN_1788604
LOC642255	0.301267	7.59937	6.28731	3.34238e-09	1.11772e-07	10.6542	642255	ILMN_1665621
VAMP3	0.6299	9.98778	6.28585	3.36729e-09	1.12485e-07	10.6471	9341	ILMN_1714527
ALOX5AP	0.81486	12.9482	6.28397	3.39971e-09	1.13447e-07	10.6378	241	ILMN_1797875
FCAR	0.847814	8.51847	6.28173	3.43878e-09	1.14564e-07	10.6268	2204	ILMN_2279367
LOC100130904	0.891718	7.30419	6.28163	3.44049e-09	1.14564e-07	10.6263	100130904	ILMN_3185147
LOC100130775	-0.57691	8.5099	-6.27961	3.47608e-09	1.15626e-07	10.6163	100130775	ILMN_3271244
ARID1A	-0.267474	9.925	-6.27852	3.49544e-09	1.16146e-07	10.611	8289	ILMN_1734496
SMAD5	-0.275836	7.37976	-6.27822	3.50071e-09	1.16198e-07	10.6095	4090	ILMN_1674551
LOC100008589	1.11566	10.6278	6.27714	3.52012e-09	1.16719e-07	10.6042	100008589	ILMN_1733559
C9orf156	-0.36581	8.71351	-6.27618	3.53722e-09	1.17075e-07	10.5995	51531	ILMN_1700028
RBMS1	0.621888	9.20364	6.27612	3.53833e-09	1.17075e-07	10.5992	5937	ILMN_1656436
LOC346950	-0.436143	7.85964	-6.27575	3.5451e-09	1.17175e-07	10.5974	346950	ILMN_1786359
FAM89A	0.424754	7.57779	6.27226	3.60856e-09	1.19147e-07	10.5802	375061	ILMN_1652677
MAGEH1	-0.289703	7.61945	-6.27095	3.63278e-09	1.19821e-07	10.5738	28986	ILMN_1659659
AZI1	-0.273366	7.48958	-6.26762	3.6947e-09	1.21735e-07	10.5574	22994	ILMN_1742262
PRICKLE1	-0.427939	7.81763	-6.26643	3.71712e-09	1.22345e-07	10.5516	144165	ILMN_1741356
FCHO1	-0.430479	7.73053	-6.26484	3.74739e-09	1.23111e-07	10.5438	23149	ILMN_1654571
PPP1R11	0.335525	11.2314	6.26479	3.74826e-09	1.23111e-07	10.5435	6992	ILMN_1747598
GIMAP7	-0.636906	11.2123	-6.26226	3.79685e-09	1.24576e-07	10.5311	168537	ILMN_1776678
CXCR5	-0.69683	8.55427	-6.26129	3.81558e-09	1.2506e-07	10.5264	643	ILMN_2337928
GRN	0.594402	11.2003	6.26046	3.83185e-09	1.25462e-07	10.5222	2896	ILMN_1724250
HSBP1	-0.350193	10.136	-6.25809	3.87813e-09	1.26845e-07	10.5107	3281	ILMN_1667030
NFKBIA	0.889664	12.6049	6.25753	3.88917e-09	1.27019e-07	10.5079	4792	ILMN_1773154
C19orf2	-0.479709	9.42362	-6.25741	3.89156e-09	1.27019e-07	10.5073	8725	ILMN_1798728
BTG3	0.355322	8.05563	6.2541	3.95768e-09	1.29042e-07	10.491	10950	ILMN_1707339
CCDC25	-0.369017	7.92651	-6.25371	3.96557e-09	1.29166e-07	10.4891	55246	ILMN_1789266
TCEAL3	-0.412083	7.76741	-6.25248	3.99041e-09	1.2984e-07	10.4831	85012	ILMN_1734190
SNRPD2	-0.479878	11.6	-6.24754	4.09173e-09	1.32998e-07	10.4589	6633	ILMN_1771060
BCLAF1	-0.305945	8.50871	-6.2465	4.11329e-09	1.3356e-07	10.4538	9774	ILMN_1690321
CHTF8	-0.164707	7.12733	-6.24574	4.12928e-09	1.33941e-07	10.4501	54921	ILMN_1684341
CR1	0.816451	8.163	6.24282	4.19098e-09	1.35802e-07	10.4357	1378	ILMN_1731118
PYGL	0.960349	10.3406	6.24165	4.21587e-09	1.36467e-07	10.43	5836	ILMN_1696187
LOC100134379	0.951076	7.40098	6.2404	4.24283e-09	1.37198e-07	10.4239	100134379	ILMN_3247633
TUBG1	0.44534	7.67957	6.2395	4.26206e-09	1.37678e-07	10.4195	7283	ILMN_1663607
WDR61	-0.507624	9.2963	-6.23805	4.29356e-09	1.38553e-07	10.4124	80349	ILMN_1665887
CEP192	-0.254386	8.02773	-6.23674	4.3222e-09	1.39333e-07	10.406	55125	ILMN_1703754
LDLRAP1	-0.627721	8.45973	-6.23627	4.33257e-09	1.39524e-07	10.4037	26119	ILMN_1809040
ATP2A2	0.436534	8.61019	6.23571	4.34495e-09	1.39779e-07	10.4009	488	ILMN_1655884
DPH5	-0.445574	8.65416	-6.23421	4.37803e-09	1.40699e-07	10.3936	51611	ILMN_1770048
CBLL1	-0.243667	8.47833	-6.23294	4.40636e-09	1.41464e-07	10.3874	79872	ILMN_1705433
PTPN1	0.476141	10.9886	6.23217	4.42367e-09	1.41874e-07	10.3836	5770	ILMN_1681591
BLOC1S1	0.542123	10.2697	6.23129	4.4434e-09	1.42361e-07	10.3793	2647	ILMN_2157510
QRICH1	-0.376642	8.41796	-6.23095	4.45112e-09	1.42463e-07	10.3776	54870	ILMN_1676002
SF3B2	-0.356612	10.3619	-6.22878	4.5004e-09	1.43893e-07	10.367	10992	ILMN_1775939
RNF24	0.981681	9.94495	6.22673	4.54727e-09	1.45244e-07	10.357	11237	ILMN_1717809
AQP12B	-0.344614	7.19663	-6.22331	4.6268e-09	1.47633e-07	10.3402	653437	ILMN_3246595
RPL39	-0.28791	13.283	-6.22207	4.6559e-09	1.48411e-07	10.3342	6170	ILMN_1737015
LOC401847	-0.226015	7.18094	-6.21921	4.72397e-09	1.50428e-07	10.3202	401847	ILMN_3212126
TRRAP	-0.453777	10.0335	-6.21863	4.73782e-09	1.50716e-07	10.3173	8295	ILMN_1660368
ZZZ3	-0.350997	8.08111	-6.21558	4.81159e-09	1.52907e-07	10.3024	26009	ILMN_1653618
CYLD	-0.383091	7.85451	-6.21109	4.92223e-09	1.56265e-07	10.2805	1540	ILMN_1775508
LOC646200	-0.507527	12.6558	-6.21058	4.93501e-09	1.56512e-07	10.278	646200	ILMN_1732328
ASPM	0.564602	7.67857	6.21036	4.94042e-09	1.56525e-07	10.2769	259266	ILMN_1815184
RARS2	-0.359735	8.13202	-6.20963	4.95875e-09	1.56947e-07	10.2733	57038	ILMN_1758214
RPL10A	-0.532927	12.8697	-6.20912	4.97153e-09	1.57193e-07	10.2708	4736	ILMN_1808041
ARIH2	-0.403438	9.29795	-6.20579	5.056e-09	1.59702e-07	10.2546	10425	ILMN_1792825
WBSCR22	-0.527912	9.24015	-6.20357	5.11314e-09	1.61345e-07	10.2437	114049	ILMN_1697348
UBQLN2	0.496199	9.5551	6.20227	5.14685e-09	1.62245e-07	10.2374	29978	ILMN_1680770
CD1C	-0.468402	7.66661	-6.20198	5.15439e-09	1.62319e-07	10.236	911	ILMN_1654210
GPR114	-0.639703	8.58346	-6.199	5.23251e-09	1.64614e-07	10.2215	221188	ILMN_1666902
ZNF212	-0.37573	7.88653	-6.19517	5.33479e-09	1.67663e-07	10.2028	7988	ILMN_1684964
FAM107B	-0.468592	10.938	-6.19188	5.42431e-09	1.70306e-07	10.1867	83641	ILMN_1758672
ZNF74	-0.179809	7.04538	-6.19005	5.47483e-09	1.71594e-07	10.1778	7625	ILMN_1802146
ZNF25	-0.43228	8.29382	-6.18999	5.4763e-09	1.71594e-07	10.1775	219749	ILMN_1808765
MKKS	-0.270042	7.8275	-6.18438	5.63384e-09	1.76355e-07	10.1501	8195	ILMN_1703916
CIRBP	-0.678782	11.3504	-6.18415	5.64026e-09	1.76379e-07	10.149	1153	ILMN_1674661
C3orf37	-0.421094	8.86279	-6.18385	5.64893e-09	1.76474e-07	10.1475	56941	ILMN_1696597
ELL2	0.643682	8.17823	6.18339	5.662e-09	1.76652e-07	10.1453	22936	ILMN_1655930
DNAJC3	0.472226	7.65903	6.18325	5.66588e-09	1.76652e-07	10.1447	5611	ILMN_1659843
ELANE	2.0686	9.22457	6.18271	5.68161e-09	1.76966e-07	10.142	1991	ILMN_1706635
CD55	0.948143	9.34662	6.18236	5.69154e-09	1.77099e-07	10.1403	1604	ILMN_1800540
PCYOX1	-0.339647	7.98291	-6.17984	5.76442e-09	1.79189e-07	10.128	51449	ILMN_1679725
ZSCAN2	-0.21216	7.18751	-6.17788	5.82184e-09	1.80794e-07	10.1184	54993	ILMN_1653163
POMP	0.401632	10.1704	6.17537	5.896e-09	1.82916e-07	10.1062	51371	ILMN_1693287
LOC100131261	-0.373996	8.59452	-6.17346	5.95293e-09	1.845e-07	10.097	100131261	ILMN_3204040
RTTN	-0.327964	7.77795	-6.16793	6.12144e-09	1.89518e-07	10.07	25914	ILMN_1735658
GNL3L	-0.615064	8.48552	-6.16775	6.12694e-09	1.89518e-07	10.0692	54552	ILMN_1708414
SCAPER	-0.350096	7.46396	-6.16723	6.14299e-09	1.89827e-07	10.0666	49855	ILMN_1811178
CTLA4	0.971368	7.90467	6.16554	6.19551e-09	1.91129e-07	10.0584	1493	ILMN_1763487
CBY1	-0.191391	6.98215	-6.16548	6.19733e-09	1.91129e-07	10.0581	25776	ILMN_1678484
ZNF792	-0.414734	7.57584	-6.16434	6.23318e-09	1.92046e-07	10.0526	126375	ILMN_1669696
RAP2C	0.38893	8.67889	6.1576	6.44856e-09	1.98486e-07	10.0198	57826	ILMN_1773561
LOC650276	-0.402366	13.32	-6.15543	6.51929e-09	2.00467e-07	10.0092	650276	ILMN_1687738
LACTB	0.565218	8.89579	6.15282	6.60545e-09	2.02917e-07	9.99658	114294	ILMN_1693830
LITAF	0.710046	12.8671	6.15175	6.64143e-09	2.03822e-07	9.99134	9516	ILMN_1713934
GBP5	1.25913	10.9779	6.15079	6.67347e-09	2.04605e-07	9.98669	115362	ILMN_2114568
ADRB2	-0.61321	8.93976	-6.15017	6.69419e-09	2.0504e-07	9.9837	154	ILMN_1695590
LOC387867	-0.524841	13.0241	-6.14648	6.81969e-09	2.0868e-07	9.96578	387867	ILMN_1710885
C2orf64	-0.476104	8.62664	-6.14345	6.92454e-09	2.11682e-07	9.95105	493753	ILMN_1683065
C15orf48	0.764649	7.32184	6.14143	6.99533e-09	2.13637e-07	9.94124	84419	ILMN_1654696
C17orf90	-0.441053	9.18222	-6.13608	7.18598e-09	2.19246e-07	9.9153	339229	ILMN_1805131
TCL1A	-1.0081	9.26718	-6.13301	7.29794e-09	2.22364e-07	9.90038	8115	ILMN_1788841
ARHGEF6	-0.383549	11.1127	-6.13289	7.30239e-09	2.22364e-07	9.89979	9459	ILMN_1803423
HDAC4	0.58058	8.11138	6.13235	7.32199e-09	2.22745e-07	9.8972	9759	ILMN_1764396
LOC728873	-0.593378	12.2771	-6.13192	7.33785e-09	2.23011e-07	9.89512	728873	ILMN_3298582
LOC442727	-0.657503	8.20444	-6.13123	7.36334e-09	2.23569e-07	9.89177	442727	ILMN_3291472
U2AF1L4	-0.342285	7.79536	-6.13002	7.40838e-09	2.24541e-07	9.88589	199746	ILMN_1779177
LRP10	0.594312	11.6172	6.12998	7.40969e-09	2.24541e-07	9.88572	26020	ILMN_1670272
KCNIP3	-0.196965	6.85066	-6.1289	7.45002e-09	2.25545e-07	9.88048	30818	ILMN_1744403
MT1G	0.897623	7.72117	6.12766	7.4966e-09	2.26736e-07	9.87446	4495	ILMN_1715401
C1orf163	2.28348	7.91247	6.12612	7.55512e-09	2.28286e-07	9.86696	65260	ILMN_1757415
LOC649548	-0.383955	13.304	-6.12589	7.56379e-09	2.28327e-07	9.86586	649548	ILMN_1672755
C1orf71	-0.557151	9.73548	-6.12331	7.66217e-09	2.31075e-07	9.85339	163882	ILMN_1670263
CXXC5	-0.639104	10.4333	-6.12312	7.66963e-09	2.31077e-07	9.85245	51523	ILMN_1745256
RRAGD	0.691732	9.20647	6.12192	7.71599e-09	2.32251e-07	9.84663	58528	ILMN_1699772
SLC7A6	-0.529777	7.88428	-6.11913	7.82476e-09	2.35298e-07	9.83313	9057	ILMN_1812559
CA4	1.49576	9.37458	6.11853	7.84858e-09	2.35788e-07	9.8302	762	ILMN_1695157
CDCA5	0.894614	8.35255	6.11799	7.86966e-09	2.36195e-07	9.82761	113130	ILMN_1683450
FBXO6	0.869444	9.59743	6.11619	7.9412e-09	2.38115e-07	9.81888	26270	ILMN_1701455
LGALS8	0.350194	7.8688	6.11386	8.03442e-09	2.40679e-07	9.80762	3964	ILMN_1669930
OSGEP	-0.509313	8.43718	-6.11034	8.17767e-09	2.44737e-07	9.79057	55644	ILMN_1753393
C22orf29	-0.38685	7.68987	-6.10954	8.21048e-09	2.45484e-07	9.7867	79680	ILMN_1759595
SP4	-0.431316	8.25397	-6.10869	8.24557e-09	2.46177e-07	9.78259	6671	ILMN_1721081
OSCAR	0.841184	9.85354	6.1086	8.24939e-09	2.46177e-07	9.78214	126014	ILMN_1741917
KIAA1009	0.35606	7.77704	6.10811	8.26981e-09	2.46552e-07	9.77976	22832	ILMN_1781174
GBP4	1.05697	11.0239	6.10458	8.41747e-09	2.50716e-07	9.76269	115361	ILMN_1771385
RPL7A	-0.530105	11.893	-6.10374	8.45309e-09	2.51538e-07	9.75861	6130	ILMN_1740749
SFT2D2	0.24389	7.41506	6.09977	8.6226e-09	2.56338e-07	9.73946	375035	ILMN_1668378
LOC645040	2.11169	7.61473	6.09914	8.65013e-09	2.56913e-07	9.73638	645040	ILMN_1737760
LOC100131713	-0.450729	12.0555	-6.09818	8.69194e-09	2.5791e-07	9.73173	100131713	ILMN_3219340
BCAS4	-0.544879	8.61963	-6.0978	8.70837e-09	2.58153e-07	9.72991	55653	ILMN_1808059
N4BP2L2	0.385405	7.50122	6.09715	8.73668e-09	2.58748e-07	9.72678	10443	ILMN_3229189
LOC728640	-0.393682	8.0934	-6.09639	8.77015e-09	2.59263e-07	9.72309	728640	ILMN_3225406
FAM100B	0.453973	9.23017	6.09638	8.77061e-09	2.59263e-07	9.72304	283991	ILMN_1775498
PDZD4	-0.431152	7.36356	-6.09343	8.90106e-09	2.62871e-07	9.7088	57595	ILMN_1708916
RGL4	1.13793	9.96938	6.09305	8.91822e-09	2.63129e-07	9.70694	266747	ILMN_1663422
GIMAP1	-0.666851	9.106	-6.09016	9.04804e-09	2.66709e-07	9.693	170575	ILMN_1757186
FAM58A	-0.48793	8.74225	-6.08971	9.06845e-09	2.67059e-07	9.69083	92002	ILMN_1770623
MYO9A	-0.42838	7.6014	-6.08901	9.10016e-09	2.67741e-07	9.68746	4649	ILMN_2173919
RPL23	-0.808803	11.6547	-6.08862	9.11812e-09	2.68018e-07	9.68556	9349	ILMN_1755115
ACSL4	0.424448	7.86832	6.08811	9.1413e-09	2.68448e-07	9.68311	2182	ILMN_1683598
INO80E	0.423739	8.75679	6.08786	9.1526e-09	2.68528e-07	9.68192	283899	ILMN_1724406
KLHL3	-0.555673	7.49178	-6.07763	9.63359e-09	2.82375e-07	9.63251	26249	ILMN_1770641
ARL5A	-0.387758	9.62155	-6.07693	9.66707e-09	2.83092e-07	9.62917	26225	ILMN_1688526
CHUK	0.392953	8.46227	6.07499	9.76145e-09	2.85588e-07	9.6198	1147	ILMN_1677041
CCNE1	0.327163	7.4337	6.07476	9.77278e-09	2.85653e-07	9.61868	898	ILMN_1733419
RNF146	0.387056	7.89331	6.07325	9.84702e-09	2.87555e-07	9.61138	81847	ILMN_1682626
MRPL34	-0.407154	9.99927	-6.07305	9.85689e-09	2.87575e-07	9.61041	64981	ILMN_1783681
DCAF16	-0.389651	7.44221	-6.07248	9.88459e-09	2.87975e-07	9.60771	54876	ILMN_1753440
C19orf35	0.584901	7.2695	6.07239	9.88899e-09	2.87975e-07	9.60728	374872	ILMN_1674926
SLC25A6	-0.535371	11.7926	-6.07094	9.961e-09	2.89803e-07	9.60028	293	ILMN_3240838
BPI	1.18313	7.88324	6.06915	1.00508e-08	2.92144e-07	9.59162	671	ILMN_1766736
USP3	0.360682	10.2307	6.06879	1.00687e-08	2.92181e-07	9.58991	9960	ILMN_1725862
TOMM6	-0.406999	11.1312	-6.06874	1.00715e-08	2.92181e-07	9.58964	100188893	ILMN_3235113
C2orf25	0.496987	10.2215	6.06857	1.008e-08	2.92181e-07	9.58882	27249	ILMN_1810759
ALDH9A1	-0.47444	11.6709	-6.06814	1.01016e-08	2.92536e-07	9.58676	223	ILMN_1761804
TMEM116	-0.344605	7.94484	-6.06721	1.01484e-08	2.93621e-07	9.5823	89894	ILMN_2052871
HIATL1	0.352915	8.19344	6.06439	1.02923e-08	2.97509e-07	9.56872	84641	ILMN_1664371
LOC731049	0.6001	9.39697	6.06323	1.03521e-08	2.98962e-07	9.56313	731049	ILMN_1808591
KCNE1	0.427883	6.82511	6.05903	1.05719e-08	3.05027e-07	9.54288	3753	ILMN_2047618
LOC440737	-0.539199	12.1124	-6.05445	1.08165e-08	3.11797e-07	9.52082	440737	ILMN_1683447
PPARG	0.220623	6.71456	6.05312	1.08881e-08	3.13574e-07	9.51445	5468	ILMN_1679901
RNASEH1	-0.414719	8.79476	-6.04989	1.10649e-08	3.18373e-07	9.49892	246243	ILMN_1726783
ZNF644	-0.172262	7.36145	-6.04693	1.12295e-08	3.22813e-07	9.48468	84146	ILMN_1657665
LOC100133077	0.557256	7.2378	6.04585	1.12903e-08	3.24262e-07	9.47947	100133077	ILMN_3287106
C5orf20	-0.255859	7.30083	-6.04469	1.1356e-08	3.2585e-07	9.47388	140947	ILMN_1701911
NRD1	0.311726	10.6651	6.042	1.15091e-08	3.29942e-07	9.46096	4898	ILMN_1800897
SBK1	-0.670167	8.42694	-6.04118	1.15561e-08	3.30986e-07	9.45703	388228	ILMN_1708261
SPOCK2	-0.644946	11.6272	-6.03816	1.17314e-08	3.357e-07	9.44252	9806	ILMN_1656287
PNOC	-0.556892	8.1625	-6.03591	1.18636e-08	3.39175e-07	9.43171	5368	ILMN_1676003
MBNL3	-1.05904	8.61654	-6.03401	1.19767e-08	3.42095e-07	9.42256	55796	ILMN_1765184
AIP	-0.381279	10.0482	-6.03139	1.21339e-08	3.46268e-07	9.40999	9049	ILMN_2103841
PHF15	-0.537884	9.22963	-6.03108	1.21526e-08	3.46488e-07	9.4085	23338	ILMN_1795285
HP1BP3	0.32375	7.70086	6.03086	1.2166e-08	3.46555e-07	9.40744	50809	ILMN_1701169
ZBTB25	-0.207458	7.48635	-6.03057	1.21834e-08	3.46656e-07	9.40606	7597	ILMN_1658728
LOC645296	-0.328487	13.3022	-6.03044	1.21917e-08	3.46656e-07	9.40541	645296	ILMN_3234831
TUBA1B	0.477566	12.8511	6.03019	1.22068e-08	3.4677e-07	9.40421	10376	ILMN_1800261
BAZ1A	0.625358	9.16739	6.0299	1.22243e-08	3.46952e-07	9.40283	11177	ILMN_1658327
CAMK2G	-0.473	8.52864	-6.0267	1.24209e-08	3.52214e-07	9.38745	818	ILMN_1809695
MPO	1.6205	8.09282	6.02369	1.26079e-08	3.57192e-07	9.37304	4353	ILMN_1705183
MRPS31	-0.406438	8.92056	-6.02351	1.26194e-08	3.57197e-07	9.37216	10240	ILMN_1654552
LOC221442	0.427678	7.60276	6.02209	1.27089e-08	3.59405e-07	9.36535	221442	ILMN_1753411
LTB4R	0.822187	8.62388	6.0217	1.27335e-08	3.59462e-07	9.36348	1241	ILMN_1747251
TRIM4	-0.281778	9.0615	-6.0217	1.27338e-08	3.59462e-07	9.36345	89122	ILMN_1792265
ITGAX	0.590821	9.29483	6.02105	1.27747e-08	3.6029e-07	9.36037	3687	ILMN_1726175
RNMTL1	-0.456183	8.66344	-6.02081	1.27904e-08	3.60407e-07	9.35919	55178	ILMN_1689652
HNRNPC	-0.322734	8.60682	-6.02061	1.28031e-08	3.60442e-07	9.35823	3183	ILMN_2334587
ESYT1	-0.660966	10.8756	-6.01967	1.28628e-08	3.61797e-07	9.35374	23344	ILMN_1761159
CCDC106	-0.627744	7.95027	-6.01864	1.29292e-08	3.63338e-07	9.34878	29903	ILMN_1682567
ZNF837	-0.331369	7.33517	-6.01787	1.29784e-08	3.64396e-07	9.34511	116412	ILMN_3226700
MSRB2	0.823986	10.5193	6.0154	1.31392e-08	3.68566e-07	9.33325	22921	ILMN_1657977
SRRM1	-0.297453	9.89049	-6.01522	1.31505e-08	3.68566e-07	9.33241	10250	ILMN_1697670
CRYL1	-0.40974	7.51086	-6.01487	1.31737e-08	3.68887e-07	9.33071	51084	ILMN_1714397
LOC286444	-0.439121	13.0354	-6.01381	1.32435e-08	3.70509e-07	9.32562	286444	ILMN_3217172
ABHD2	0.3323	7.48446	6.01198	1.33642e-08	3.73553e-07	9.31687	11057	ILMN_1723662
ZNF559	-0.460779	7.63282	-6.00928	1.35444e-08	3.78254e-07	9.30396	84527	ILMN_1677785
FAM49B	0.524301	8.76465	6.00905	1.35604e-08	3.78364e-07	9.30282	51571	ILMN_1809400
ACSL1	1.23788	10.6627	6.00561	1.37939e-08	3.84535e-07	9.28636	2180	ILMN_1684585
LOC100133678	-0.929581	11.287	-6.00446	1.3873e-08	3.86397e-07	9.28085	100133678	ILMN_3249667
PPP1R13B	-0.386647	7.30905	-6.0032	1.39603e-08	3.88246e-07	9.2748	23368	ILMN_1748831
ENPP2	0.65884	7.43877	6.00314	1.39642e-08	3.88246e-07	9.27453	5168	ILMN_1780799
LOC100130092	0.329881	8.51237	6.00127	1.40944e-08	3.91521e-07	9.26558	100130092	ILMN_3195376
LOC100132761	-0.780415	8.52025	-6.00107	1.41089e-08	3.91575e-07	9.26459	100132761	ILMN_3214893
PPP1CB	-0.356862	8.79859	-5.99836	1.43e-08	3.96527e-07	9.25163	5500	ILMN_2405018
LOC648189	0.318647	7.40261	5.99781	1.43385e-08	3.97243e-07	9.24903	648189	ILMN_1689876
REEP5	-0.510195	9.62364	-5.99704	1.43935e-08	3.98416e-07	9.24534	7905	ILMN_1758941
TRAT1	-0.429179	8.05185	-5.99642	1.4438e-08	3.99293e-07	9.24237	50852	ILMN_1684943
DET1	-0.252658	7.50085	-5.99288	1.46937e-08	4.06006e-07	9.22545	55070	ILMN_1661653
C12orf45	-0.36525	7.97051	-5.99001	1.49044e-08	4.11465e-07	9.21172	121053	ILMN_1728435
ZNF275	-0.386319	7.89469	-5.9895	1.49427e-08	4.12149e-07	9.20925	10838	ILMN_2243553
C7orf43	0.378584	8.66926	5.98932	1.49554e-08	4.12149e-07	9.20842	55262	ILMN_1770030
LOC728440	0.577088	7.60933	5.98775	1.50729e-08	4.15022e-07	9.20088	728440	ILMN_3229210
HEATR2	-0.297388	7.79725	-5.98751	1.50909e-08	4.15153e-07	9.19973	54919	ILMN_1732537
LOC642210	-0.218172	14.1872	-5.98677	1.51458e-08	4.16296e-07	9.19623	642210	ILMN_1715926
THOC2	-0.389779	8.36186	-5.98654	1.51636e-08	4.1642e-07	9.1951	57187	ILMN_1696883
H2AFY	0.258698	11.092	5.9807	1.56086e-08	4.28267e-07	9.16722	9555	ILMN_1674034
NACC1	0.240882	7.1903	5.98012	1.5654e-08	4.29135e-07	9.16442	112939	ILMN_1658231
TOMM22	-0.46534	9.24544	-5.97861	1.57713e-08	4.31731e-07	9.15722	56993	ILMN_1714623
EMR1	1.21927	9.00498	5.97855	1.57762e-08	4.31731e-07	9.15692	2015	ILMN_1780601
RPAP3	-0.30241	7.74121	-5.97775	1.58391e-08	4.33073e-07	9.15309	79657	ILMN_1766916
EPN1	0.423142	11.1481	5.97709	1.58902e-08	4.34091e-07	9.14998	29924	ILMN_1772981
GLG1	-0.415015	11.1179	-5.97692	1.5904e-08	4.34091e-07	9.14915	2734	ILMN_1772261
TAP1	0.677099	12.6027	5.97438	1.61055e-08	4.39208e-07	9.13701	6890	ILMN_1751079
ATP5S	-0.378302	7.82143	-5.97302	1.62139e-08	4.41779e-07	9.13055	27109	ILMN_1679188
SNIP1	-0.371896	8.31889	-5.97283	1.62291e-08	4.4181e-07	9.12964	79753	ILMN_1651278
SLC24A6	-0.406719	9.68401	-5.97138	1.63466e-08	4.44621e-07	9.12269	80024	ILMN_1701655
RAB27A	0.482435	8.68452	5.97089	1.63861e-08	4.45309e-07	9.12037	5873	ILMN_1665859
CPSF4	-0.288848	8.97017	-5.96936	1.65106e-08	4.48304e-07	9.11307	10898	ILMN_1660426
LCP1	0.380486	13.7256	5.96841	1.65886e-08	4.50032e-07	9.10853	3936	ILMN_1662932
NFIL3	0.761907	9.09171	5.96731	1.66788e-08	4.52087e-07	9.1033	4783	ILMN_1707312
ZNHIT6	-0.401105	7.98247	-5.96691	1.67121e-08	4.526e-07	9.10138	54680	ILMN_1668540
PHLDA1	0.260722	7.1181	5.96541	1.68367e-08	4.55579e-07	9.09422	22822	ILMN_1687978
BATF2	0.99381	7.82063	5.96492	1.68778e-08	4.56174e-07	9.09187	116071	ILMN_1690241
HACL1	-0.546568	8.53812	-5.9648	1.68878e-08	4.56174e-07	9.0913	26061	ILMN_1723414
NCF1	0.818951	12.5947	5.96462	1.69023e-08	4.56174e-07	9.09047	653361	ILMN_1697309
EIF4B	-0.500329	11.647	-5.96337	1.70072e-08	4.58609e-07	9.08451	1975	ILMN_1655497
SPSB3	-0.633124	10.8295	-5.96256	1.7076e-08	4.60068e-07	9.08062	90864	ILMN_1682864
LRFN3	-0.411063	8.21682	-5.96146	1.71693e-08	4.62185e-07	9.07537	79414	ILMN_2103919
ATG3	0.454804	9.96401	5.95593	1.76448e-08	4.74576e-07	9.04904	64422	ILMN_1769566
SNURF	-0.431647	9.25802	-5.9554	1.76918e-08	4.75247e-07	9.04647	8926	ILMN_1660000
MYCBP2	-0.470284	9.28607	-5.9553	1.77001e-08	4.75247e-07	9.04603	23077	ILMN_1811972
PRPSAP2	-0.337003	9.23277	-5.95447	1.77734e-08	4.76807e-07	9.04204	5636	ILMN_1812445
RBCK1	0.530306	10.0083	5.95342	1.78653e-08	4.78863e-07	9.03707	10616	ILMN_1751330
IL18RAP	1.04696	11.3121	5.95303	1.78997e-08	4.79375e-07	9.03522	8807	ILMN_1721762
AKAP11	-0.214831	7.61777	-5.95042	1.81319e-08	4.85179e-07	9.0228	11215	ILMN_1693220
RNU6-1	1.18312	10.4047	5.94946	1.82183e-08	4.87074e-07	9.01822	26827	ILMN_3308335
FAS	0.499516	7.62305	5.94803	1.83481e-08	4.90127e-07	9.01137	355	ILMN_1808132
LOC728973	-0.606332	10.7055	-5.94511	1.8614e-08	4.96807e-07	8.99751	728973	ILMN_1685378
MIF4GD	-0.358929	9.03203	-5.94287	1.8821e-08	5.01904e-07	8.98685	57409	ILMN_1743806
MRPL54	-0.529403	10.2547	-5.94247	1.88588e-08	5.02486e-07	8.98492	116541	ILMN_1658486
CA5B	-0.384899	7.63303	-5.9381	1.92701e-08	5.13006e-07	8.96413	11238	ILMN_1672807
C22orf32	-0.379927	7.29736	-5.93579	1.94912e-08	5.18454e-07	8.95313	91689	ILMN_1706859
CEBPD	0.814859	12.2302	5.93553	1.95162e-08	5.18678e-07	8.9519	1052	ILMN_1782050
TRIM25	0.770644	9.98582	5.93085	1.99716e-08	5.30331e-07	8.92967	7706	ILMN_1813625
FLT3LG	-0.772322	8.98365	-5.93023	2.00332e-08	5.31516e-07	8.92671	2323	ILMN_2091412
LOC339970	-0.3058	7.79529	-5.92909	2.01462e-08	5.33691e-07	8.92128	339970	ILMN_3217522
AGGF1	-0.273351	8.32106	-5.92906	2.01493e-08	5.33691e-07	8.92114	55109	ILMN_1776153
TCEA2	-0.254654	7.60398	-5.92782	2.02725e-08	5.36502e-07	8.91527	6919	ILMN_1665526
JMJD8	-0.469418	10.4412	-5.92591	2.04646e-08	5.4113e-07	8.90618	339123	ILMN_1687921
STAB1	0.473259	7.51844	5.92514	2.05419e-08	5.42715e-07	8.90255	23166	ILMN_1655987
TMEM42	-0.333274	8.54999	-5.92062	2.10049e-08	5.53756e-07	8.88107	131616	ILMN_1760245
KCNG1	-0.164263	6.76348	-5.92058	2.10094e-08	5.53756e-07	8.88087	3755	ILMN_1670833
PGK1	0.379854	11.3672	5.92054	2.10128e-08	5.53756e-07	8.88071	5230	ILMN_1755749
TMEM206	-0.348639	7.68238	-5.91998	2.10715e-08	5.54834e-07	8.87802	55248	ILMN_3247821
ZNF296	-0.46768	9.4033	-5.91918	2.11544e-08	5.5655e-07	8.87424	162979	ILMN_1693242
H2AFX	0.479942	8.00509	5.91785	2.12936e-08	5.59744e-07	8.86792	3014	ILMN_2200331
HNRPA1L-2	-0.8129	8.89594	-5.91614	2.14737e-08	5.64003e-07	8.85981	664709	ILMN_2220283
C14orf109	-0.271126	8.76941	-5.91332	2.17742e-08	5.71417e-07	8.84642	26175	ILMN_3193306
SLC3A2	0.335426	8.43989	5.91199	2.19174e-08	5.74695e-07	8.8401	6520	ILMN_1679041
ESD	-0.353649	9.68853	-5.90943	2.21952e-08	5.81493e-07	8.82796	2098	ILMN_1669818
ATG4C	-0.243149	7.71017	-5.90862	2.2284e-08	5.83332e-07	8.82412	84938	ILMN_1700923
LOC642178	-0.633555	7.82209	-5.90585	2.25898e-08	5.90842e-07	8.81099	642178	ILMN_1681411
ELF2	-0.285268	8.08039	-5.90285	2.2925e-08	5.99109e-07	8.7968	1998	ILMN_1691559
RAB2A	0.344282	8.86014	5.90168	2.30575e-08	6.0207e-07	8.79125	5862	ILMN_1652394
SDHAF1	-0.346583	8.14577	-5.90146	2.3083e-08	6.02233e-07	8.79018	644096	ILMN_1693124
ZNF134	-0.249541	7.34639	-5.90092	2.31447e-08	6.03341e-07	8.78761	7693	ILMN_1768809
FERMT3	0.353899	10.5622	5.89859	2.34104e-08	6.09759e-07	8.77662	83706	ILMN_2366330
C5orf39	-0.462224	10.0969	-5.89648	2.36555e-08	6.15634e-07	8.76658	389289	ILMN_2098616
HNRPA1P4	-0.834048	10.5392	-5.89623	2.36842e-08	6.15867e-07	8.76541	389674	ILMN_1690586
RNU6-15	1.10618	10.4361	5.89436	2.39032e-08	6.21047e-07	8.75655	100302741	ILMN_3310351
OSBP	-0.296721	9.84983	-5.89041	2.43718e-08	6.32696e-07	8.73785	5007	ILMN_1706376
LOC90925	-0.744845	9.03582	-5.88906	2.4534e-08	6.36381e-07	8.73146	90925	ILMN_1794927
LOC646766	-0.512209	12.9748	-5.88888	2.45546e-08	6.3639e-07	8.73065	646766	ILMN_1775243
LCN2	1.5978	10.4342	5.88721	2.47579e-08	6.40437e-07	8.72271	3934	ILMN_1692223
EXOSC4	0.666009	8.22914	5.88719	2.47597e-08	6.40437e-07	8.72264	54512	ILMN_1745271
SLC2A11	0.65735	7.30885	5.88702	2.4781e-08	6.40437e-07	8.72181	66035	ILMN_1748090
EIF3M	-0.427705	10.1571	-5.88692	2.47925e-08	6.40437e-07	8.72136	10480	ILMN_2192693
ERBB2	-0.191269	6.92221	-5.88636	2.48616e-08	6.41692e-07	8.71868	2064	ILMN_1717902
LOC648099	-0.386218	7.62747	-5.88609	2.48944e-08	6.4201e-07	8.71741	648099	ILMN_1672687
OLIG1	-0.941125	8.18076	-5.88553	2.49624e-08	6.43234e-07	8.71478	116448	ILMN_1666089
SIVA1	-0.432631	10.2464	-5.88392	2.51608e-08	6.47333e-07	8.70716	10572	ILMN_3231820
LOC100129379	-0.759029	11.7369	-5.88384	2.51703e-08	6.47333e-07	8.70679	100129379	ILMN_3178252
C14orf43	-0.23951	7.98941	-5.88374	2.51835e-08	6.47333e-07	8.70629	91748	ILMN_1763091
ST3GAL3	-0.212023	7.31139	-5.88149	2.54633e-08	6.53989e-07	8.69565	6487	ILMN_1699472
DEF6	-0.401147	10.475	-5.88046	2.55915e-08	6.56477e-07	8.69081	50619	ILMN_2145280
C3orf54	-0.569312	7.94691	-5.88038	2.5602e-08	6.56477e-07	8.69041	389119	ILMN_1690454
PRAM1	0.631166	9.04491	5.87992	2.56603e-08	6.57431e-07	8.68822	84106	ILMN_1711493
EIF2B5	-0.413549	8.67539	-5.87868	2.58167e-08	6.609e-07	8.68237	8893	ILMN_1688534
LOC100129608	-0.366234	7.49655	-5.87829	2.58661e-08	6.61624e-07	8.68053	100129608	ILMN_3263007
HPD	0.306941	7.13635	5.87691	2.60421e-08	6.6558e-07	8.674	3242	ILMN_1745688
LCMT1	-0.367328	9.13251	-5.87509	2.62751e-08	6.7099e-07	8.66542	51451	ILMN_1688452
IFNG	0.834842	7.55155	5.8725	2.66106e-08	6.79004e-07	8.6532	3458	ILMN_2207291
IL2RG	0.332143	8.06252	5.8699	2.69522e-08	6.87159e-07	8.64091	3561	ILMN_1794386
ABHD14A	-0.461751	8.05829	-5.86947	2.70101e-08	6.88077e-07	8.63885	25864	ILMN_1794213
OSBPL10	-0.628377	7.64556	-5.86867	2.7115e-08	6.90189e-07	8.63511	114884	ILMN_1669497
CNFN	-0.297686	7.51161	-5.86807	2.71957e-08	6.9168e-07	8.63225	84518	ILMN_1803838
LOC100132291	-0.626768	11.882	-5.8669	2.73526e-08	6.95107e-07	8.62671	100132291	ILMN_3275345
PHF20	-0.294219	8.50343	-5.86289	2.78947e-08	7.08309e-07	8.60781	51230	ILMN_1813657
TMEM14C	-0.505853	10.2391	-5.86246	2.79532e-08	7.0922e-07	8.60579	51522	ILMN_1657857
PSG3	0.565161	7.79315	5.86158	2.8075e-08	7.11733e-07	8.60161	5671	ILMN_1685312
PRKCZ	-0.219025	7.40208	-5.86008	2.82821e-08	7.16403e-07	8.59453	5590	ILMN_1662155
C4orf14	-0.509806	9.32519	-5.85769	2.86152e-08	7.24257e-07	8.58325	84273	ILMN_1665066
LOC728142	-0.180338	7.11283	-5.85663	2.87635e-08	7.27421e-07	8.57827	728142	ILMN_3218003
LOC646785	-0.531894	11.8317	-5.85476	2.90278e-08	7.33513e-07	8.56947	646785	ILMN_3210538
JAK2	0.619994	8.14747	5.8544	2.90798e-08	7.34236e-07	8.56774	3717	ILMN_1683178
RPS9	-0.299978	13.571	-5.85388	2.9153e-08	7.35492e-07	8.56532	6203	ILMN_1749447
LOC653737	-0.414022	12.2099	-5.85128	2.95274e-08	7.44337e-07	8.55303	653737	ILMN_3213531
BACH2	-0.426718	7.74585	-5.85054	2.96343e-08	7.46432e-07	8.54955	60468	ILMN_1659943
PRTN3	1.45064	7.49254	5.85019	2.96843e-08	7.4709e-07	8.54793	5657	ILMN_1668460
LOC653773	-0.528946	11.5359	-5.84561	3.03573e-08	7.63414e-07	8.52634	653773	ILMN_1659405
WARS	1.01783	11.7793	5.84406	3.05881e-08	7.6829e-07	8.51905	7453	ILMN_1727271
HNRNPA3P1	1.0342	7.76549	5.84398	3.06002e-08	7.6829e-07	8.51867	10151	ILMN_2174574
SNX29	-0.497211	8.46153	-5.84334	3.06966e-08	7.70093e-07	8.51564	92017	ILMN_1659761
LOC644761	-0.190885	7.44271	-5.84201	3.08967e-08	7.74494e-07	8.50938	644761	ILMN_3201629
NDUFA3	-0.389213	11.3596	-5.83726	3.16229e-08	7.92063e-07	8.48701	4696	ILMN_1784641
GRB10	0.317286	7.29463	5.8339	3.21466e-08	8.04539e-07	8.4712	2887	ILMN_1652662
TCEAL4	-0.263796	7.59919	-5.83329	3.22428e-08	8.06303e-07	8.46832	79921	ILMN_1748625
LOC732432	0.391235	7.79471	5.83288	3.23074e-08	8.07255e-07	8.46639	732432	ILMN_3243055
PASK	-0.700809	8.61592	-5.83272	3.23324e-08	8.07255e-07	8.46565	23178	ILMN_1667022
CHD6	-0.257395	7.58652	-5.83032	3.27133e-08	8.16114e-07	8.45437	84181	ILMN_1781816
LOC651149	-0.781915	10.5967	-5.82624	3.33713e-08	8.31866e-07	8.4352	651149	ILMN_1660439
ZNF585A	-0.219522	7.63633	-5.82219	3.40385e-08	8.47796e-07	8.41614	199704	ILMN_1737211
LOC647436	-0.476161	8.10123	-5.82203	3.40644e-08	8.47796e-07	8.4154	647436	ILMN_1772998
LOC645138	-0.581713	12.3265	-5.82008	3.43911e-08	8.55246e-07	8.40622	645138	ILMN_1676792
NEK8	-0.35784	7.30247	-5.81991	3.44194e-08	8.5527e-07	8.40543	284086	ILMN_1755138
MAPKAPK2	0.322815	8.94054	5.81925	3.45305e-08	8.57353e-07	8.40232	9261	ILMN_1656144
KIDINS220	0.407178	9.08281	5.81861	3.46382e-08	8.59346e-07	8.39932	57498	ILMN_1679232
PAFAH1B3	-0.544249	9.38104	-5.81814	3.47176e-08	8.60633e-07	8.39712	5050	ILMN_1748093
LOC641727	-0.305774	7.48162	-5.81526	3.52079e-08	8.72097e-07	8.38362	641727	ILMN_3241118
NPAL3	-0.452492	8.54835	-5.81499	3.52549e-08	8.72572e-07	8.38234	57185	ILMN_1684210
ZNHIT3	-0.496925	9.1642	-5.81441	3.53551e-08	8.74361e-07	8.3796	9326	ILMN_1705331
KIAA1128	-0.304603	8.32519	-5.81351	3.55096e-08	8.77491e-07	8.3754	54462	ILMN_1742124
LILRA5	0.92897	9.7532	5.81264	3.56607e-08	8.80531e-07	8.37132	353514	ILMN_1726545
CAPN3	0.300842	7.24881	5.81166	3.58324e-08	8.84074e-07	8.36669	825	ILMN_1687971
CDK10	-0.32929	7.916	-5.81056	3.60251e-08	8.88128e-07	8.36153	8558	ILMN_1687353
NIP7	-0.413779	8.8718	-5.80939	3.62307e-08	8.92494e-07	8.35605	51388	ILMN_1704305
GMEB2	-0.38585	8.90921	-5.80886	3.63239e-08	8.93387e-07	8.35358	26205	ILMN_1683204
LOC100129553	-0.25502	14.1399	-5.80886	3.6324e-08	8.93387e-07	8.35358	100129553	ILMN_3266128
CNOT10	-0.349566	7.90983	-5.80742	3.65812e-08	8.99008e-07	8.34678	25904	ILMN_2078334
LOC646909	-0.351792	7.35813	-5.80475	3.70591e-08	9.10039e-07	8.33429	646909	ILMN_3211302
PPP1R2	-0.42271	9.22097	-5.80064	3.7808e-08	9.27703e-07	8.31503	5504	ILMN_1683044
E4F1	-0.508771	9.21302	-5.80021	3.7888e-08	9.2892e-07	8.313	1877	ILMN_1720287
PMPCB	-0.527439	9.24913	-5.80005	3.79169e-08	9.2892e-07	8.31226	9512	ILMN_1728660
RAB11FIP3	-0.492075	8.84579	-5.79853	3.81999e-08	9.3512e-07	8.3051	9727	ILMN_1708328
SLAMF8	0.621757	7.44895	5.79687	3.85085e-08	9.41939e-07	8.29736	56833	ILMN_1667224
NOL9	-0.293872	6.93539	-5.79593	3.8685e-08	9.4552e-07	8.29296	79707	ILMN_1761181
UBL3	-0.327099	9.2323	-5.79575	3.87191e-08	9.45614e-07	8.29211	5412	ILMN_1810729
TRIP6	0.327566	7.98057	5.79543	3.878e-08	9.46365e-07	8.2906	7205	ILMN_1713990
PLEKHA9	-0.466368	7.91974	-5.7952	3.88229e-08	9.46674e-07	8.28953	51054	ILMN_1706610
NPEPPS	0.397526	8.27701	5.79431	3.89923e-08	9.50067e-07	8.28534	9520	ILMN_1680435
CBX7	-0.49698	9.30362	-5.79335	3.91753e-08	9.53783e-07	8.28083	23492	ILMN_1657361
MAPK1	0.275995	9.43003	5.79256	3.93248e-08	9.56679e-07	8.27717	5594	ILMN_1706677
TIGD5	-0.357179	8.12252	-5.79239	3.93575e-08	9.56733e-07	8.27637	84948	ILMN_1705774
ITGA5	-0.512813	8.98333	-5.79128	3.95703e-08	9.6116e-07	8.27118	3678	ILMN_1792679
AFF3	-0.437238	7.28113	-5.79048	3.97259e-08	9.64191e-07	8.2674	3899	ILMN_1677951
PKMYT1	0.321186	7.18953	5.78939	3.99365e-08	9.68553e-07	8.26231	9088	ILMN_1766658
RTN2	0.203064	7.13034	5.78742	4.03222e-08	9.77151e-07	8.25306	6253	ILMN_1685357
C8orf33	-0.318917	8.34795	-5.78399	4.09995e-08	9.92796e-07	8.23703	65265	ILMN_1706275
LOC93622	-0.43576	7.79956	-5.78296	4.12055e-08	9.97015e-07	8.2322	93622	ILMN_1797181
RALB	0.716459	11.2982	5.78203	4.1391e-08	1.00073e-06	8.22788	5899	ILMN_1676358
COPZ1	-0.357028	9.64205	-5.78006	4.17908e-08	1.0096e-06	8.21863	22818	ILMN_1728535
LILRB4	0.479096	7.7358	5.7799	4.18223e-08	1.0096e-06	8.2179	11006	ILMN_1778974
NACC2	0.370732	7.47868	5.77956	4.18912e-08	1.01048e-06	8.21632	138151	ILMN_1809522
CLEC4E	0.780244	8.16069	5.77845	4.21177e-08	1.01516e-06	8.21113	26253	ILMN_1771664
RGS19	0.480384	11.3727	5.77679	4.24585e-08	1.02259e-06	8.20337	10287	ILMN_1677085
LTBR	0.682495	9.27281	5.77554	4.27178e-08	1.02805e-06	8.19751	4055	ILMN_1667476
MAL	-0.787014	10.6019	-5.77229	4.33982e-08	1.04362e-06	8.1823	4118	ILMN_2320330
MBNL1	-0.391554	9.54982	-5.77124	4.362e-08	1.04815e-06	8.1774	4154	ILMN_1748358
BIN1	-0.586939	10.7115	-5.76962	4.39648e-08	1.05563e-06	8.16982	274	ILMN_1674160
HPSE	0.592698	8.26036	5.76941	4.40094e-08	1.05589e-06	8.16885	10855	ILMN_1779547
C1GALT1C1	0.361045	8.11597	5.76418	4.51412e-08	1.08221e-06	8.14441	29071	ILMN_1751234
B4GALT7	-0.349611	8.64893	-5.76309	4.53788e-08	1.08708e-06	8.13936	11285	ILMN_1663541
LOC728153	-0.45779	8.33023	-5.76119	4.57995e-08	1.09632e-06	8.13048	728153	ILMN_1771048
LOC650826	-0.245193	7.20378	-5.76063	4.59238e-08	1.09846e-06	8.12787	650826	ILMN_1717690
LOC645693	-0.417568	8.10609	-5.76043	4.5969e-08	1.0987e-06	8.12692	645693	ILMN_3212284
EDG1	-0.506088	8.90168	-5.75856	4.6387e-08	1.10784e-06	8.11821	1901	ILMN_1653504
CUGBP1	0.213116	7.15425	5.75821	4.64659e-08	1.10883e-06	8.11658	10658	ILMN_1686516
NR3C1	-0.185959	7.0982	-5.75807	4.64991e-08	1.10883e-06	8.11589	2908	ILMN_1668525
CPVL	-0.915907	10.3378	-5.75786	4.65446e-08	1.10907e-06	8.11495	54504	ILMN_1682928
ALDH3A2	-0.246892	7.69104	-5.75442	4.73293e-08	1.12691e-06	8.09886	224	ILMN_1667564
INTS9	-0.407101	9.36351	-5.75162	4.79741e-08	1.1414e-06	8.08584	55756	ILMN_1777118
SIVA	-0.469971	9.49801	-5.75038	4.8265e-08	1.14745e-06	8.08002	10572	ILMN_1696046
FER1L3	0.98652	8.50562	5.74734	4.89812e-08	1.16359e-06	8.06585	26509	ILMN_1810289
WIPI1	0.464469	8.28667	5.74556	4.94038e-08	1.17274e-06	8.05758	55062	ILMN_1781386
XRN1	0.449933	8.32935	5.74472	4.96055e-08	1.17615e-06	8.05367	54464	ILMN_1809086
MRPS25	-0.391964	7.86194	-5.74465	4.96225e-08	1.17615e-06	8.05333	64432	ILMN_1798826
DEXI	-0.422269	9.21513	-5.74252	5.01369e-08	1.18745e-06	8.04341	28955	ILMN_1738866
POLR3H	-0.226439	7.35595	-5.74106	5.04914e-08	1.19494e-06	8.03663	171568	ILMN_1731718
OLFM4	1.55019	7.64893	5.74074	5.05714e-08	1.19593e-06	8.03511	10562	ILMN_1753954
IL7R	-0.653012	11.3454	-5.7392	5.09496e-08	1.20396e-06	8.02794	3575	ILMN_1691341
CDC2L6	-0.324796	9.6116	-5.73812	5.12157e-08	1.20862e-06	8.02293	23097	ILMN_1676891
NFKBIB	0.277621	7.72478	5.73809	5.12239e-08	1.20862e-06	8.02278	4793	ILMN_1674152
LTF	1.52684	8.59604	5.73728	5.14248e-08	1.21245e-06	8.01901	4057	ILMN_1677920
HEATR6	-0.391942	7.63081	-5.73641	5.16405e-08	1.21662e-06	8.01498	63897	ILMN_1791106
C12orf62	-0.447092	8.68779	-5.73478	5.205e-08	1.22535e-06	8.00738	84987	ILMN_1804656
VASP	0.533974	8.75975	5.73405	5.22344e-08	1.22876e-06	8.00398	7408	ILMN_1743646
LOC338758	-0.609809	8.98448	-5.73361	5.23456e-08	1.23046e-06	8.00193	338758	ILMN_1795835
MYST1	-0.37581	8.92519	-5.73222	5.26981e-08	1.23781e-06	7.99548	84148	ILMN_1804679
NDUFB2	-0.40136	11.5671	-5.73175	5.28182e-08	1.23971e-06	7.99329	4708	ILMN_2117330
LOC728635	-0.475846	8.67836	-5.73109	5.29866e-08	1.24273e-06	7.99022	728635	ILMN_1676014
POLR1C	-0.29992	8.47322	-5.72851	5.36533e-08	1.25742e-06	7.9782	9533	ILMN_1746686
DDX19A	-0.225267	8.06574	-5.72705	5.40317e-08	1.26534e-06	7.97143	55308	ILMN_1727051
INO80	-0.257747	8.21119	-5.72433	5.47489e-08	1.28118e-06	7.95875	54617	ILMN_1678362
KLHDC2	-0.55131	8.95902	-5.72143	5.5519e-08	1.29823e-06	7.94531	23588	ILMN_1741204
METTL9	0.433135	7.48922	5.72021	5.58498e-08	1.305e-06	7.9396	51108	ILMN_1726421
PMPCA	-0.308321	8.53552	-5.71946	5.60523e-08	1.30875e-06	7.93612	23203	ILMN_1764239
ZNF234	-0.268634	7.30652	-5.7182	5.63924e-08	1.31571e-06	7.9303	10780	ILMN_1740197
LOC648980	-0.43382	8.56349	-5.71698	5.67271e-08	1.32254e-06	7.9246	648980	ILMN_3275575
PKIA	-0.362422	7.19401	-5.71673	5.67948e-08	1.32256e-06	7.92346	5569	ILMN_1674031
GIMAP5	-0.649932	10.8004	-5.71667	5.68125e-08	1.32256e-06	7.92316	55340	ILMN_1769383
ARID5B	0.431717	9.57623	5.71415	5.75081e-08	1.33776e-06	7.91145	84159	ILMN_1721626
FLJ20273	0.710968	7.9876	5.7117	5.81903e-08	1.35262e-06	7.90011	54502	ILMN_1689046
NAB1	0.329958	7.9773	5.70882	5.90045e-08	1.37053e-06	7.88674	4664	ILMN_1774617
PPFIBP2	-0.451042	8.31111	-5.70684	5.9572e-08	1.38269e-06	7.87753	8495	ILMN_1675656
DDX47	-0.357788	9.49515	-5.70607	5.97941e-08	1.38682e-06	7.87395	51202	ILMN_1747162
ACTB	0.156824	14.1643	5.7045	6.02483e-08	1.39632e-06	7.86668	60	ILMN_1777296
CD3D	-0.741274	11.181	-5.70244	6.08494e-08	1.4092e-06	7.85713	915	ILMN_1724643
CCNL1	0.405472	8.93679	5.70128	6.11912e-08	1.41607e-06	7.85174	57018	ILMN_1683129
KIR3DL2	0.858353	8.10221	5.70084	6.13203e-08	1.41802e-06	7.84971	3812	ILMN_2190842
ASTE1	-0.508511	8.16943	-5.69985	6.16149e-08	1.42378e-06	7.8451	28990	ILMN_1803813
DDAH2	0.525136	8.57042	5.69793	6.21873e-08	1.43594e-06	7.83621	23564	ILMN_1770787
AMD1	-0.271044	9.13814	-5.69568	6.28644e-08	1.45051e-06	7.82579	262	ILMN_1667994
TTYH3	0.554015	8.49611	5.6934	6.35576e-08	1.46543e-06	7.81525	80727	ILMN_1692731
LOC645968	-0.595583	8.10133	-5.69314	6.36383e-08	1.46589e-06	7.81403	645968	ILMN_1695370
SAMD3	-0.689277	8.74707	-5.69303	6.36712e-08	1.46589e-06	7.81353	154075	ILMN_1659158
CMTM4	0.137461	7.00596	5.69188	6.40261e-08	1.47199e-06	7.80818	146223	ILMN_1720930
BASP1	0.917349	12.5997	5.69187	6.403e-08	1.47199e-06	7.80812	10409	ILMN_1651826
ECGF1	0.560477	12.4422	5.69055	6.44381e-08	1.48028e-06	7.80201	1890	ILMN_1690939
PGAM4	0.324564	9.61918	5.68959	6.47345e-08	1.486e-06	7.7976	441531	ILMN_1682953
COX19	-0.500712	8.5556	-5.68765	6.53448e-08	1.49891e-06	7.78858	90639	ILMN_1656656
LOC100131672	-0.534242	8.29198	-5.68342	6.66882e-08	1.52861e-06	7.769	100131672	ILMN_3200539
DEPDC1B	0.185391	7.14714	5.68271	6.69157e-08	1.53233e-06	7.76573	55789	ILMN_1814600
NSMCE1	-0.425579	9.48152	-5.68261	6.69485e-08	1.53233e-06	7.76526	197370	ILMN_1697962
RAB31	0.581536	11.4698	5.68107	6.74446e-08	1.54256e-06	7.75816	11031	ILMN_1660691
LOC552889	-0.359185	9.35011	-5.68092	6.74936e-08	1.54256e-06	7.75746	552889	ILMN_3237507
CEL	0.360465	7.23413	5.67953	6.79474e-08	1.5518e-06	7.75102	1056	ILMN_1723418
TCF7L2	0.317683	7.16767	5.67819	6.8386e-08	1.56068e-06	7.74483	6934	ILMN_1672486
XRCC5	-0.293598	9.65024	-5.67568	6.92176e-08	1.5785e-06	7.7332	7520	ILMN_2105983
TBX21	-0.365886	7.54004	-5.67536	6.93225e-08	1.57975e-06	7.73175	30009	ILMN_1692714
NFX1	-0.272979	7.69979	-5.66964	7.12565e-08	1.62264e-06	7.70529	4799	ILMN_1698402
LOC100133931	-0.275877	13.7705	-5.66939	7.13423e-08	1.62341e-06	7.70413	100133931	ILMN_3245403
MGAT4A	-0.271227	7.70481	-5.66896	7.14881e-08	1.62555e-06	7.70217	11320	ILMN_1755643
PDCD2L	-0.394764	7.77681	-5.66829	7.1718e-08	1.6296e-06	7.69908	84306	ILMN_1706149
KDELR1	0.349353	9.36699	5.66813	7.17741e-08	1.62969e-06	7.69833	10945	ILMN_2130411
GPN1	-0.339735	9.41888	-5.66673	7.22578e-08	1.63929e-06	7.69187	11321	ILMN_1772719
dJ341D10.1	0.554174	8.23225	5.66661	7.23015e-08	1.63929e-06	7.69129	286453	ILMN_1790985
FAM32A	-0.31293	10.2109	-5.66606	7.24912e-08	1.6424e-06	7.68877	26017	ILMN_3237241
C6orf190	-0.61903	8.05868	-5.66494	7.2884e-08	1.65011e-06	7.68357	387357	ILMN_1684040
G0S2	0.956363	7.52342	5.66375	7.33011e-08	1.65835e-06	7.67809	50486	ILMN_1691846
GRINA	0.898348	9.99094	5.66236	7.3791e-08	1.66823e-06	7.67168	2907	ILMN_1796490
ZNF266	-0.366856	7.83261	-5.66073	7.43706e-08	1.67963e-06	7.66416	10781	ILMN_1753782
LOC100132323	-0.39913	7.65787	-5.66064	7.44027e-08	1.67963e-06	7.66374	100132323	ILMN_3245194
RIOK1	-0.204413	7.28026	-5.65742	7.55625e-08	1.70419e-06	7.64887	83732	ILMN_1652487
CETP	0.353573	7.41617	5.65732	7.55991e-08	1.70419e-06	7.64841	1071	ILMN_1681882
CCDC109B	-0.500781	10.9486	-5.65695	7.57343e-08	1.70601e-06	7.64669	55013	ILMN_1801766
FNBP1	-0.323553	11.4123	-5.65622	7.59976e-08	1.71071e-06	7.64335	23048	ILMN_1797342
AGPAT5	-0.395017	7.64963	-5.65499	7.64486e-08	1.71963e-06	7.63766	55326	ILMN_1662049
SIGLEC8	-0.319571	6.73207	-5.65184	7.76115e-08	1.74453e-06	7.62315	27181	ILMN_1730295
FAM160A2	0.465428	8.54034	5.65163	7.76891e-08	1.74503e-06	7.62219	84067	ILMN_1713402
DNAJC10	-0.259502	8.07952	-5.64965	7.84313e-08	1.76043e-06	7.61305	54431	ILMN_1656486
NFKB2	0.546212	7.97689	5.64925	7.85813e-08	1.76254e-06	7.61121	4791	ILMN_1799062
ZNF529	-0.331954	7.93252	-5.64839	7.89085e-08	1.76861e-06	7.60721	57711	ILMN_1660193
MTR	-0.341694	8.08346	-5.64819	7.89828e-08	1.76901e-06	7.60631	4548	ILMN_1670801
ZMYM6	-0.336185	8.74399	-5.64738	7.92899e-08	1.77462e-06	7.60258	9204	ILMN_1657632
FPR2	1.0754	9.98235	5.64712	7.93871e-08	1.77553e-06	7.6014	2358	ILMN_1740875
TRPC4AP	0.272186	9.9487	5.64513	8.0148e-08	1.79127e-06	7.59223	26133	ILMN_2402805
DPEP2	-0.691137	10.205	-5.64443	8.04201e-08	1.79607e-06	7.58897	64174	ILMN_1689160
TSPYL1	-0.30652	9.24619	-5.64398	8.05936e-08	1.79866e-06	7.5869	7259	ILMN_1779014
TRAPPC3	-0.3754	9.51492	-5.64203	8.13496e-08	1.81424e-06	7.57792	27095	ILMN_1751627
PROS1	0.652074	7.84864	5.64052	8.19414e-08	1.82614e-06	7.57096	5627	ILMN_1671928
TM9SF4	0.380873	9.39602	5.63759	8.30978e-08	1.85026e-06	7.55748	9777	ILMN_1674421
LOC130773	-0.349161	7.90885	-5.63748	8.3142e-08	1.85026e-06	7.55697	130773	ILMN_1672009
ANGEL2	-0.445426	9.0719	-5.63661	8.34876e-08	1.85664e-06	7.55298	90806	ILMN_1736340
CEACAM8	1.28965	7.68683	5.63484	8.41989e-08	1.87113e-06	7.54483	1088	ILMN_1806056
MPHOSPH10	-0.325226	8.36637	-5.63219	8.52757e-08	1.89371e-06	7.53261	10199	ILMN_1652085
COL17A1	0.749458	7.30252	5.63087	8.58157e-08	1.90435e-06	7.52655	1308	ILMN_1651282
PLOD3	0.411799	8.89761	5.63058	8.59322e-08	1.90559e-06	7.52524	8985	ILMN_1774836
LOC650799	-0.347365	7.63787	-5.62883	8.66564e-08	1.92029e-06	7.51717	650799	ILMN_1715436
TSHZ3	0.618117	8.23111	5.62841	8.68295e-08	1.92277e-06	7.51526	57616	ILMN_1743933
GAPDH	0.422784	12.4275	5.62509	8.82202e-08	1.95218e-06	7.49998	2597	ILMN_1343295
PLAC8	0.553271	12.2313	5.62356	8.88695e-08	1.96516e-06	7.49293	51316	ILMN_1653026
RBM22	-0.263945	10.7364	-5.62331	8.89724e-08	1.96605e-06	7.49182	55696	ILMN_1760256
LOC647346	-0.153129	7.28896	-5.61888	9.08805e-08	2.0068e-06	7.47143	647346	ILMN_1724881
RENBP	0.557191	8.89579	5.61811	9.12141e-08	2.01275e-06	7.4679	5973	ILMN_1780057
HSH2D	-0.636707	9.44544	-5.61613	9.20793e-08	2.03041e-06	7.45883	84941	ILMN_1788017
DHRS4L2	-0.475955	7.86687	-5.61547	9.2374e-08	2.03548e-06	7.45576	317749	ILMN_1761450
CEACAM6	1.19317	7.65139	5.61451	9.27947e-08	2.04331e-06	7.45139	4680	ILMN_1712522
LOC643287	-0.760736	9.64991	-5.61398	9.30306e-08	2.04707e-06	7.44895	643287	ILMN_1677906
MCRS1	-0.290335	9.2725	-5.60973	9.4938e-08	2.08757e-06	7.42945	10445	ILMN_1713147
PRKRIR	-0.340322	9.68035	-5.60936	9.51086e-08	2.08984e-06	7.42772	5612	ILMN_1655622
MCTP2	0.600826	7.47054	5.60921	9.51745e-08	2.08984e-06	7.42706	55784	ILMN_1792682
C19orf60	-0.428584	9.91772	-5.60807	9.56957e-08	2.09981e-06	7.42181	55049	ILMN_3188110
EPRS	-0.413993	9.9696	-5.60764	9.58925e-08	2.10266e-06	7.41983	2058	ILMN_1783695
PHKG2	-0.329173	7.82345	-5.60607	9.66114e-08	2.11694e-06	7.41265	5261	ILMN_1669607
MRPL20	-0.410196	9.53275	-5.60402	9.75646e-08	2.13633e-06	7.40322	55052	ILMN_1693352
TPX2	0.535041	7.60989	5.60175	9.8626e-08	2.1568e-06	7.39282	22974	ILMN_1796949
IFITM2	0.36839	14.2028	5.60172	9.86371e-08	2.1568e-06	7.39271	10581	ILMN_1673352
ZNF358	-0.367091	8.2873	-5.59915	9.98547e-08	2.1819e-06	7.38092	140467	ILMN_1662340
NUPL2	-0.254805	8.63046	-5.59652	1.01115e-07	2.20791e-06	7.36887	11097	ILMN_1789616
LOC100131662	-0.389506	7.209	-5.59586	1.01436e-07	2.21337e-06	7.36582	100131662	ILMN_3203126
TUSC4	-0.47635	9.72685	-5.5952	1.01754e-07	2.21877e-06	7.36281	10641	ILMN_2191568
GALT	-0.296948	7.92826	-5.59499	1.01857e-07	2.21946e-06	7.36184	2592	ILMN_1657475
APEX2	0.380344	8.9391	5.59432	1.02182e-07	2.22501e-06	7.35878	27301	ILMN_1652505
ZYX	0.497836	11.5249	5.59326	1.02698e-07	2.23468e-06	7.35394	7791	ILMN_1701875
PEX5	-0.347994	9.08529	-5.5931	1.02776e-07	2.23483e-06	7.35321	5830	ILMN_1660232
SERPING1	1.08081	8.38905	5.59212	1.03258e-07	2.24374e-06	7.34872	710	ILMN_1670305
UNC84A	-0.35938	8.07672	-5.59197	1.03333e-07	2.24383e-06	7.34801	23353	ILMN_1772316
LRRN1	0.327178	7.25487	5.59067	1.03974e-07	2.25619e-06	7.34207	57633	ILMN_1720511
PIM2	0.430421	10.916	5.58995	1.04333e-07	2.2624e-06	7.33876	11040	ILMN_1748283
C5orf32	1.14361	9.80167	5.589	1.04805e-07	2.26892e-06	7.33443	84418	ILMN_1761566
NUSAP1	0.597479	7.93412	5.58881	1.04902e-07	2.26892e-06	7.33354	51203	ILMN_1726720
LOC731985	-0.49498	12.3304	-5.5888	1.04907e-07	2.26892e-06	7.3335	731985	ILMN_1814011
MT2A	0.891475	11.9585	5.58876	1.04923e-07	2.26892e-06	7.33334	4502	ILMN_1686664
C21orf2	-0.50006	8.28276	-5.5885	1.05056e-07	2.27022e-06	7.33213	755	ILMN_1758806
CYTH2	0.374943	7.48278	5.58811	1.0525e-07	2.27223e-06	7.33036	9266	ILMN_3188106
COX4I1	-0.27535	12.9782	-5.58788	1.05368e-07	2.27223e-06	7.32928	1327	ILMN_1652207
KIAA1632	0.208998	7.21067	5.58786	1.05379e-07	2.27223e-06	7.32918	57724	ILMN_1652188
EBAG9	-0.306176	8.13144	-5.58774	1.05439e-07	2.27223e-06	7.32863	9166	ILMN_1729144
PAG1	0.386601	8.71801	5.58327	1.07707e-07	2.31952e-06	7.30818	55824	ILMN_1673640
ZCCHC3	-0.329927	7.59373	-5.58261	1.08045e-07	2.32519e-06	7.30517	85364	ILMN_1786852
CLNS1A	-0.494268	10.2034	-5.58101	1.0887e-07	2.34134e-06	7.29786	1207	ILMN_1736814
ACACB	-0.424517	7.18751	-5.58038	1.09196e-07	2.34675e-06	7.29499	32	ILMN_1763852
PSMD6	0.251361	10.5283	5.5785	1.10179e-07	2.36623e-06	7.28638	9861	ILMN_1779633
TUBGCP5	-0.276402	7.59833	-5.57812	1.10377e-07	2.36887e-06	7.28465	114791	ILMN_1803045
TSPAN3	-0.484947	9.30191	-5.57591	1.11544e-07	2.39223e-06	7.27455	10099	ILMN_1655469
C2orf68	-0.347511	7.75562	-5.57577	1.11618e-07	2.39223e-06	7.27391	388969	ILMN_3247681
DHX37	-0.268874	8.13122	-5.57311	1.13042e-07	2.42108e-06	7.26173	57647	ILMN_1805742
ARHGAP10	-0.350158	7.12407	-5.57174	1.13781e-07	2.43525e-06	7.25547	79658	ILMN_1736112
SRGN	0.486434	13.6747	5.57003	1.14708e-07	2.45343e-06	7.24767	5552	ILMN_1760347
MOSC1	0.961684	8.84975	5.56673	1.16523e-07	2.49054e-06	7.23259	64757	ILMN_1799106
VEGFB	-0.466821	9.01462	-5.56644	1.16684e-07	2.49229e-06	7.23126	7423	ILMN_1722855
ZDHHC1	-0.36481	7.23629	-5.56586	1.17003e-07	2.49738e-06	7.22865	29800	ILMN_2094313
DCTD	-0.399379	8.9607	-5.56469	1.17658e-07	2.50967e-06	7.22328	1635	ILMN_1802456
LPAR2	0.637859	9.58442	5.5627	1.18772e-07	2.53171e-06	7.21422	9170	ILMN_3236220
HK1	0.506093	10.4583	5.5623	1.18999e-07	2.53481e-06	7.21239	3098	ILMN_1755548
SLC36A1	0.402814	7.65768	5.56199	1.19174e-07	2.53682e-06	7.21098	206358	ILMN_2124471
TRIB1	0.905057	9.63145	5.56093	1.19775e-07	2.54788e-06	7.20615	10221	ILMN_1803811
LOC284167	-0.300941	8.03753	-5.5607	1.19908e-07	2.54899e-06	7.20508	284167	ILMN_3293049
HMMR	0.530136	7.48566	5.5601	1.20249e-07	2.55449e-06	7.20236	3161	ILMN_1781942
GPR137B	0.452951	8.18717	5.5588	1.20995e-07	2.56861e-06	7.19641	7107	ILMN_2121816
TCEAL8	-0.376887	8.01146	-5.55559	1.22855e-07	2.60631e-06	7.18176	90843	ILMN_1656399
PLEKHA2	-0.264766	8.90262	-5.55475	1.23343e-07	2.6149e-06	7.17795	59339	ILMN_1715589
KIF20A	0.461457	7.3789	5.55257	1.2463e-07	2.6404e-06	7.16798	10112	ILMN_1695658
LOC646688	-0.530214	11.7448	-5.55219	1.24854e-07	2.64336e-06	7.16625	646688	ILMN_3205162
ANKRD46	-0.394584	7.59334	-5.55163	1.25184e-07	2.64855e-06	7.16372	157567	ILMN_1712298
C10orf33	-0.556897	7.36787	-5.5512	1.25438e-07	2.65213e-06	7.16177	84795	ILMN_1684497
LOC441743	-0.522834	7.62986	-5.55037	1.25932e-07	2.66078e-06	7.158	441743	ILMN_2110829
MYL5	-0.294891	7.46988	-5.54894	1.26795e-07	2.67721e-06	7.15144	4636	ILMN_1746948
FAM165B	-0.396756	8.43535	-5.54644	1.28307e-07	2.70732e-06	7.14005	54065	ILMN_3238845
LOC400759	0.818722	7.87229	5.54584	1.28669e-07	2.71313e-06	7.13734	400759	ILMN_1782487
HEG1	0.40561	8.27221	5.54501	1.29178e-07	2.72203e-06	7.13355	57493	ILMN_1666122
DOCK10	-0.444485	10.1956	-5.54384	1.29893e-07	2.73525e-06	7.12825	55619	ILMN_1702301
ZBED2	0.304289	6.72797	5.54364	1.30019e-07	2.73607e-06	7.12732	79413	ILMN_1651365
C1orf109	-0.380432	7.70926	-5.54091	1.31713e-07	2.76987e-06	7.11488	54955	ILMN_2077886
RPS18	-0.518325	12.7629	-5.53883	1.33015e-07	2.79538e-06	7.10543	6222	ILMN_1753534
DKFZp761P0423	-0.573003	8.90386	-5.5359	1.34878e-07	2.83261e-06	7.09208	157285	ILMN_1757872
CHES1	-0.460015	10.2405	-5.53219	1.3727e-07	2.87969e-06	7.07519	1112	ILMN_2106902
TGIF2	-0.379807	8.25298	-5.53213	1.37303e-07	2.87969e-06	7.07496	60436	ILMN_1709044
C20orf52	-0.579431	11.182	-5.53181	1.37512e-07	2.88213e-06	7.0735	140823	ILMN_1801633
LOC100134504	-0.639848	9.05419	-5.52918	1.39238e-07	2.91637e-06	7.06152	100134504	ILMN_3241834
RPL32	-0.260697	11.9672	-5.52424	1.42527e-07	2.98327e-06	7.0391	6161	ILMN_1663799
LOC642956	0.472336	7.70653	5.52357	1.42986e-07	2.99087e-06	7.03601	642956	ILMN_3210741
RPS6KB2	-0.426633	9.96499	-5.523	1.43371e-07	2.99693e-06	7.03343	6199	ILMN_1761175
AUP1	0.259367	8.16998	5.52238	1.4379e-07	3.00368e-06	7.03063	550	ILMN_1651378
EDG4	0.626197	10.1242	5.52209	1.43986e-07	3.00577e-06	7.02932	9170	ILMN_1662741
GPBAR1	-0.942597	8.97792	-5.52137	1.44478e-07	3.01404e-06	7.02604	151306	ILMN_1727709
C1orf165	-0.302033	7.01604	-5.51939	1.45837e-07	3.04035e-06	7.01705	79656	ILMN_1675024
LOC391811	-0.452829	10.4706	-5.51887	1.46196e-07	3.04581e-06	7.01469	391811	ILMN_1746252
NDUFA12	-0.477876	10.9053	-5.51783	1.46919e-07	3.05786e-06	7.00995	55967	ILMN_1737738
NUDCD3	-0.331421	8.07734	-5.51775	1.46969e-07	3.05786e-06	7.00963	23386	ILMN_1796900
IDH3B	-0.300743	9.84077	-5.51747	1.47166e-07	3.05992e-06	7.00834	3420	ILMN_1721669
GLTSCR2	-0.479557	13.2429	-5.51647	1.47863e-07	3.07238e-06	7.0038	29997	ILMN_1703565
LOC100130892	-0.495926	9.3025	-5.51619	1.48063e-07	3.07405e-06	7.0025	100130892	ILMN_3195253
SNAP23	0.537365	8.66541	5.51608	1.4814e-07	3.07405e-06	7.00201	8773	ILMN_1687519
C16orf75	0.456057	8.48521	5.51555	1.48506e-07	3.0796e-06	6.99964	116028	ILMN_1790537
PPP1R3D	0.464492	8.15162	5.51505	1.48862e-07	3.08496e-06	6.99733	5509	ILMN_1781198
LOC728484	-0.515842	8.57809	-5.51377	1.49762e-07	3.10155e-06	6.99155	728484	ILMN_3225121
MAN1B1	-0.496467	9.26974	-5.5109	1.51811e-07	3.1419e-06	6.9785	11253	ILMN_1771957
PRKCD	0.459451	10.5805	5.5107	1.51955e-07	3.14281e-06	6.97759	5580	ILMN_1682813
MEGF6	-0.363253	7.36909	-5.50947	1.5284e-07	3.15705e-06	6.97201	1953	ILMN_3241441
LOC387753	-0.475501	7.93761	-5.50946	1.52845e-07	3.15705e-06	6.97198	387753	ILMN_3289489
LOC642489	0.471499	11.4246	5.50874	1.53362e-07	3.16563e-06	6.96874	642489	ILMN_1757072
PCBP1	0.211778	13.1598	5.50831	1.53677e-07	3.17006e-06	6.96677	5093	ILMN_1673215
RPS6KB1	-0.367209	8.50636	-5.50797	1.53921e-07	3.17299e-06	6.96525	6198	ILMN_1704557
TLR5	0.904319	8.95705	5.50729	1.54415e-07	3.18109e-06	6.96217	7100	ILMN_1722981
GADD45A	0.770567	8.47767	5.50655	1.54958e-07	3.19018e-06	6.9588	1647	ILMN_1694075
C10orf104	-0.460737	8.38235	-5.50291	1.57642e-07	3.24331e-06	6.94231	119504	ILMN_1738955
CMTM6	0.480234	10.7848	5.50101	1.59066e-07	3.27045e-06	6.93368	54918	ILMN_1696494
PLAGL2	0.475291	9.49782	5.50086	1.59176e-07	3.27056e-06	6.93301	5326	ILMN_1786601
NFIB	0.437603	7.41272	5.49946	1.60231e-07	3.28851e-06	6.92667	4781	ILMN_1778991
PUF60	-0.451996	11.0717	-5.49942	1.60259e-07	3.28851e-06	6.9265	22827	ILMN_1779404
MRPS6	-0.519997	10.8615	-5.49648	1.625e-07	3.33232e-06	6.91317	64968	ILMN_1723874
POTEE	0.434391	7.82838	5.49575	1.63058e-07	3.34157e-06	6.90988	445582	ILMN_3242016
ZCCHC7	-0.512714	8.61579	-5.49429	1.64187e-07	3.36251e-06	6.90325	84186	ILMN_1744980
SETX	-0.520806	8.83504	-5.49276	1.65376e-07	3.38464e-06	6.89633	23064	ILMN_1763436
ENO1	0.373324	12.8341	5.49154	1.66328e-07	3.40191e-06	6.89082	2023	ILMN_1710756
LOC100132037	-0.478382	10.2537	-5.49068	1.67005e-07	3.41339e-06	6.88691	100132037	ILMN_3283664
PSMG4	-0.314765	8.21264	-5.49055	1.67107e-07	3.41339e-06	6.88633	389362	ILMN_3224204
MYD88	0.491145	10.2729	5.48863	1.6863e-07	3.44224e-06	6.87762	4615	ILMN_1738523
PIK3AP1	0.585845	8.88991	5.48564	1.71017e-07	3.4887e-06	6.86412	118788	ILMN_1652787
NHP2	-0.413998	9.56816	-5.48415	1.72222e-07	3.511e-06	6.85738	55651	ILMN_1718672
NXF1	0.345464	10.2591	5.48318	1.73009e-07	3.52474e-06	6.85301	10482	ILMN_1705783
LOC646849	-0.411587	9.36565	-5.48278	1.7334e-07	3.5292e-06	6.85117	646849	ILMN_1692545
LOC728791	-0.386343	7.67201	-5.48127	1.74579e-07	3.55211e-06	6.84434	728791	ILMN_3301052
PLSCR1	1.02491	8.81893	5.47984	1.75756e-07	3.57375e-06	6.83788	5359	ILMN_1745242
C6orf173	0.497503	7.55159	5.47964	1.75916e-07	3.57469e-06	6.83701	387103	ILMN_1763907
LOC644496	0.150102	6.86265	5.47917	1.7631e-07	3.58035e-06	6.83487	644496	ILMN_3209232
NDUFS3	-0.468648	10.6335	-5.47858	1.76798e-07	3.58794e-06	6.83221	4722	ILMN_1756355
CARD17	0.579507	7.48965	5.47603	1.78931e-07	3.62888e-06	6.8207	440068	ILMN_1707979
CASP7	0.373402	7.45061	5.47584	1.79096e-07	3.62989e-06	6.81981	840	ILMN_1730332
LOC730254	-0.266562	7.11538	-5.47447	1.80254e-07	3.65009e-06	6.81362	730254	ILMN_3223966
IRF8	-0.473635	11.0107	-5.47438	1.80326e-07	3.65009e-06	6.81324	3394	ILMN_1666594
SNX20	0.394052	7.63411	5.47374	1.8087e-07	3.65873e-06	6.81035	124460	ILMN_1746213
C17orf53	0.339362	7.40473	5.46794	1.85871e-07	3.75747e-06	6.78417	78995	ILMN_1776490
ARRB2	0.527137	8.58644	5.46653	1.87112e-07	3.78012e-06	6.77779	409	ILMN_1675866
TUG1	-0.303965	11.1624	-5.46637	1.87249e-07	3.78044e-06	6.77708	55000	ILMN_1682783
FAM43A	-0.560668	8.16804	-5.46549	1.8803e-07	3.79377e-06	6.77309	131583	ILMN_1706015
RPS13	-0.390359	13.4363	-5.46486	1.88581e-07	3.80245e-06	6.77028	6207	ILMN_1777344
PFAAP5	-0.313801	8.14273	-5.46276	1.90453e-07	3.83771e-06	6.7608	10443	ILMN_1797893
LOC391370	-0.49893	12.9785	-5.45711	1.95581e-07	3.93853e-06	6.7353	391370	ILMN_3293367
PRPF19	-0.488482	8.98029	-5.45653	1.96115e-07	3.94674e-06	6.73268	27339	ILMN_1769545
DMXL2	0.500744	8.18552	5.45417	1.983e-07	3.98814e-06	6.72205	23312	ILMN_1705663
SFT2D1	0.347631	10.8653	5.45282	1.99557e-07	4.01086e-06	6.71598	113402	ILMN_1734895
AZU1	1.38044	7.9281	5.44897	2.0319e-07	4.08126e-06	6.69867	566	ILMN_1730867
ZNF831	-0.352096	7.78436	-5.44847	2.03673e-07	4.08833e-06	6.69639	128611	ILMN_1658016
CHST14	-0.295095	7.30176	-5.44586	2.06179e-07	4.13598e-06	6.68466	113189	ILMN_1743340
FOLR3	1.48373	10.9015	5.44495	2.07059e-07	4.15099e-06	6.68057	2352	ILMN_1730454
ITM2A	-0.611591	10.5072	-5.44408	2.0791e-07	4.16538e-06	6.67663	9452	ILMN_2076600
ARPC5	0.346876	12.1359	5.44287	2.0909e-07	4.18633e-06	6.6712	10092	ILMN_1768394
FAM156B	0.377159	8.34177	5.44231	2.09645e-07	4.19477e-06	6.66866	727866	ILMN_3244110
SFRS6	-0.433371	10.838	-5.44151	2.10425e-07	4.20769e-06	6.66509	6431	ILMN_1697469
SGK	-0.734439	9.5729	-5.44137	2.10568e-07	4.20786e-06	6.66444	6446	ILMN_1702487
MAD2L1	0.311419	7.44396	5.43898	2.12936e-07	4.25247e-06	6.65371	4085	ILMN_1777564
ALPK1	0.679714	8.73425	5.43424	2.17724e-07	4.34301e-06	6.63237	80216	ILMN_2078697
TRERF1	-0.192084	7.18944	-5.43421	2.17746e-07	4.34301e-06	6.63227	55809	ILMN_1666556
ECM1	0.209138	7.28491	5.43405	2.17918e-07	4.34366e-06	6.63152	1893	ILMN_1658333
LOC100130562	-0.56375	10.8517	-5.43381	2.1816e-07	4.34572e-06	6.63045	100130562	ILMN_3192836
TGFBR3	-0.853181	8.95572	-5.42867	2.23469e-07	4.44866e-06	6.60738	7049	ILMN_1784287
LOC100129650	-0.802373	11.1222	-5.42838	2.23774e-07	4.45189e-06	6.60607	100129650	ILMN_3254492
CDKN1B	-0.285117	9.56479	-5.4276	2.24595e-07	4.4654e-06	6.60256	1027	ILMN_1722811
ITGB2	0.246481	14.097	5.42588	2.26406e-07	4.49854e-06	6.59486	3689	ILMN_1654396
VAMP8	-0.488869	11.0958	-5.42532	2.27003e-07	4.50755e-06	6.59233	8673	ILMN_2190084
NELF	-0.508044	8.44148	-5.42474	2.2762e-07	4.51693e-06	6.58973	26012	ILMN_1665095
PPRC1	-0.393038	8.53886	-5.42282	2.29679e-07	4.55303e-06	6.58108	23082	ILMN_1796210
KCNJ15	0.705562	8.03788	5.42277	2.29729e-07	4.55303e-06	6.58087	3772	ILMN_1659770
RBED1	0.38206	8.07719	5.42173	2.30852e-07	4.57239e-06	6.5762	84173	ILMN_1668065
ATP1B3	0.378024	8.87897	5.42066	2.32003e-07	4.59228e-06	6.57143	483	ILMN_1654322
VPREB1	-0.693476	7.02915	-5.41999	2.32732e-07	4.60381e-06	6.56841	7441	ILMN_1738549
PTMS	0.672662	8.16694	5.41794	2.34975e-07	4.64235e-06	6.55921	5763	ILMN_1721046
LOC727758	0.338058	7.76293	5.41794	2.34977e-07	4.64235e-06	6.55921	727758	ILMN_3248379
ZMYM4	-0.247562	7.64155	-5.41762	2.35326e-07	4.64632e-06	6.55778	9202	ILMN_1688404
SCML4	-0.304228	7.12666	-5.41495	2.38285e-07	4.70177e-06	6.54579	256380	ILMN_1747436
CCNB1	0.296627	7.25562	5.41461	2.38662e-07	4.70626e-06	6.54428	891	ILMN_1712803
ASPSCR1	-0.343962	8.57998	-5.41403	2.39308e-07	4.71601e-06	6.54168	79058	ILMN_1660749
LOC100134018	-0.22637	7.08531	-5.41307	2.40382e-07	4.73262e-06	6.53739	100134018	ILMN_3242234
NECAP1	0.322807	9.0923	5.41301	2.40452e-07	4.73262e-06	6.53711	25977	ILMN_1726359
CCDC130	-0.334323	10.3335	-5.41279	2.407e-07	4.73452e-06	6.53612	81576	ILMN_1758633
ICAM5	0.186063	6.996	5.40954	2.44385e-07	4.80399e-06	6.52154	7087	ILMN_1802524
USP7	-0.518323	8.63978	-5.40767	2.46531e-07	4.84313e-06	6.51316	7874	ILMN_1729319
MKI67IP	-0.490594	9.13855	-5.40603	2.48419e-07	4.87508e-06	6.50584	84365	ILMN_1786189
ADSL	-0.381515	10.6152	-5.40599	2.48468e-07	4.87508e-06	6.50565	158	ILMN_1790757
EBF1	-0.45962	7.35916	-5.40062	2.54767e-07	4.99554e-06	6.48163	1879	ILMN_1778681
VAV2	-0.307948	7.60674	-5.39995	2.55571e-07	5.00818e-06	6.47861	7410	ILMN_1794781
SERTAD1	0.340695	9.54857	5.39959	2.56004e-07	5.01352e-06	6.47699	29950	ILMN_1794017
TOP2B	-0.406147	10.46	-5.39831	2.57528e-07	5.04022e-06	6.47129	7155	ILMN_1777663
COMMD7	-0.311581	10.7202	-5.39666	2.59521e-07	5.07605e-06	6.4639	149951	ILMN_1810334
ASCC2	-0.995431	12.0678	-5.39076	2.66767e-07	5.21452e-06	6.43749	84164	ILMN_1679919
LOC731823	0.456038	7.19467	5.39055	2.6702e-07	5.2162e-06	6.43658	731823	ILMN_1671276
PRSS33	-0.704784	6.93774	-5.39038	2.67232e-07	5.21709e-06	6.43582	260429	ILMN_1736831
LOC651894	-0.276707	13.4471	-5.3889	2.69089e-07	5.25008e-06	6.42917	651894	ILMN_1679920
LOC729679	-0.575574	12.7312	-5.38804	2.70163e-07	5.26775e-06	6.42536	729679	ILMN_3239629
CIB1	-0.417986	12.0648	-5.38784	2.70415e-07	5.26938e-06	6.42446	10519	ILMN_1684205
PRDM8	0.445804	8.20871	5.38647	2.72143e-07	5.29977e-06	6.41835	56978	ILMN_1802082
IFNGR2	0.493388	12.328	5.38624	2.72439e-07	5.30223e-06	6.41731	3460	ILMN_1764964
MTMR10	-0.231479	9.08987	-5.38548	2.73399e-07	5.31763e-06	6.41393	54893	ILMN_1778734
TSPAN5	-1.29403	10.0664	-5.38486	2.74191e-07	5.32972e-06	6.41116	10098	ILMN_1799028
ADARB1	-0.366315	7.90199	-5.38356	2.75856e-07	5.35876e-06	6.40535	104	ILMN_1657442
CUTA	-0.408601	10.2506	-5.38294	2.76655e-07	5.37094e-06	6.40258	51596	ILMN_1712390
DDX46	-0.382392	7.99886	-5.38261	2.7708e-07	5.37586e-06	6.40111	9879	ILMN_1727001
MELK	0.482733	7.5704	5.38244	2.773e-07	5.3768e-06	6.40035	9833	ILMN_1731184
NUP93	-0.356838	9.16888	-5.38222	2.77588e-07	5.37907e-06	6.39935	9688	ILMN_2196569
CMIP	0.361928	10.4675	5.38171	2.78251e-07	5.38528e-06	6.39706	80790	ILMN_1690888
PNRC2	-0.360755	9.72814	-5.38171	2.78253e-07	5.38528e-06	6.39706	55629	ILMN_1778957
DFFA	-0.264641	7.98525	-5.3809	2.79296e-07	5.40214e-06	6.39347	1676	ILMN_1667213
CNGB1	-0.116674	6.93842	-5.38039	2.79958e-07	5.4116e-06	6.3912	1258	ILMN_1702383
ZXDC	-0.204797	7.389	-5.37976	2.80779e-07	5.42413e-06	6.38839	79364	ILMN_1743643
LASP1	0.274073	12.6289	5.37666	2.8487e-07	5.49976e-06	6.37452	3927	ILMN_1665909
SGPP2	0.189939	7.25332	5.37608	2.85636e-07	5.51115e-06	6.37194	130367	ILMN_1662140
KIF14	0.343155	7.38531	5.37567	2.86183e-07	5.51832e-06	6.37011	9928	ILMN_1808071
RPRD1A	-0.239615	7.95182	-5.3708	2.9274e-07	5.64128e-06	6.34838	55197	ILMN_1764207
TSPAN32	-0.544072	9.68734	-5.36948	2.9454e-07	5.67247e-06	6.34251	10077	ILMN_1718621
LOC728693	-0.310279	12.693	-5.36777	2.96892e-07	5.71234e-06	6.33488	728693	ILMN_3228108
FRMD8	-0.302134	9.88269	-5.36771	2.96974e-07	5.71234e-06	6.33461	83786	ILMN_3241870
HIGD2A	-0.43469	11.4785	-5.36757	2.97169e-07	5.71257e-06	6.33398	192286	ILMN_1774334
C3orf75	-0.337228	8.09995	-5.36724	2.97616e-07	5.71767e-06	6.33254	54859	ILMN_1708382
LOC100128805	-0.300953	7.90942	-5.36675	2.98297e-07	5.72723e-06	6.33035	100128805	ILMN_3268028
CYFIP2	-0.395244	10.5563	-5.36639	2.98793e-07	5.73324e-06	6.32876	26999	ILMN_1677200
C1orf151	-0.191717	7.48896	-5.36428	3.01745e-07	5.78634e-06	6.31933	440574	ILMN_1657860
UTP23	-0.405091	7.56269	-5.36365	3.02626e-07	5.79969e-06	6.31653	84294	ILMN_1774860
HIST2H2BE	0.83781	10.4739	5.36318	3.03295e-07	5.80895e-06	6.31442	8349	ILMN_1732071
WWP1	-0.310196	8.2067	-5.3619	3.05092e-07	5.8398e-06	6.30875	11059	ILMN_1804328
ASPHD2	0.522386	8.07737	5.36071	3.06792e-07	5.86876e-06	6.30343	57168	ILMN_2167426
OLAH	0.623681	6.95623	5.35925	3.08873e-07	5.90495e-06	6.29695	55301	ILMN_1674696
CES4	0.146551	6.91424	5.35852	3.09929e-07	5.91999e-06	6.29367	51716	ILMN_1767415
KRAS	0.249011	8.13187	5.35844	3.10037e-07	5.91999e-06	6.29334	3845	ILMN_1652104
C17orf68	-0.320031	8.19133	-5.35813	3.10484e-07	5.9249e-06	6.29196	80169	ILMN_1702676
STK40	0.418012	10.1779	5.3572	3.11836e-07	5.94709e-06	6.28779	83931	ILMN_1679311
PPP1CC	-0.370962	10.9269	-5.35593	3.1368e-07	5.97862e-06	6.28214	5501	ILMN_1701855
ZNF302	-0.237475	7.70146	-5.35342	3.17343e-07	6.04475e-06	6.27101	55900	ILMN_1702188
ZNF581	-0.428623	9.57452	-5.3526	3.18559e-07	6.06422e-06	6.26734	51545	ILMN_1679093
REXO4	-0.519094	9.07871	-5.35214	3.19243e-07	6.07357e-06	6.26528	57109	ILMN_1677452
LOC100130624	-0.359875	7.70414	-5.34898	3.23961e-07	6.15958e-06	6.25122	100130624	ILMN_3178890
PPP2R5E	-0.313469	9.36745	-5.34877	3.24266e-07	6.16165e-06	6.25031	5529	ILMN_1666761
CBARA1	0.390993	8.46679	5.34852	3.24641e-07	6.16504e-06	6.24921	10367	ILMN_1807540
INSIG2	0.30584	8.30151	5.34798	3.25454e-07	6.17672e-06	6.24681	51141	ILMN_1676629
TOP1	0.275473	7.57361	5.34744	3.26271e-07	6.18849e-06	6.2444	7150	ILMN_1763419
C5AR1	0.780478	10.0364	5.34602	3.28426e-07	6.22307e-06	6.23809	728	ILMN_1689836
TM9SF2	0.318472	10.2841	5.34598	3.28492e-07	6.22307e-06	6.2379	9375	ILMN_1785765
LOC644774	0.457981	10.9283	5.34497	3.30029e-07	6.24842e-06	6.23343	644774	ILMN_1779258
C14orf72	0.262615	7.26734	5.34089	3.36337e-07	6.364e-06	6.21527	145200	ILMN_1658628
LOC400793	0.404466	7.06124	5.33955	3.38423e-07	6.3996e-06	6.20935	400793	ILMN_1803473
C7orf44	-0.371074	9.35034	-5.33865	3.39841e-07	6.42254e-06	6.20534	55744	ILMN_2081335
LONRF1	0.335591	7.47359	5.33817	3.40598e-07	6.43297e-06	6.20321	91694	ILMN_1705953
LOC729816	0.638405	8.54026	5.33786	3.41087e-07	6.43832e-06	6.20183	729816	ILMN_3232696
ITM2B	0.46945	12.0855	5.33753	3.41617e-07	6.44444e-06	6.20034	9445	ILMN_1751708
FAM160B1	0.34852	8.32305	5.33702	3.42425e-07	6.4558e-06	6.19808	57700	ILMN_3182275
APBB1IP	0.496232	11.2396	5.33595	3.44116e-07	6.48377e-06	6.19336	54518	ILMN_1801710
HSD17B8	-0.499523	8.48495	-5.3353	3.45165e-07	6.49965e-06	6.19044	7923	ILMN_1715324
LOC100130633	-0.359878	8.29157	-5.33439	3.46612e-07	6.52157e-06	6.18643	100130633	ILMN_3265343
ALOX15	-0.322677	7.15722	-5.33431	3.46746e-07	6.52157e-06	6.18606	246	ILMN_1676042
NR2C2AP	-0.284953	8.09804	-5.33251	3.49641e-07	6.57207e-06	6.17809	126382	ILMN_2135798
UGP2	0.260508	8.74054	5.32953	3.54504e-07	6.65948e-06	6.16485	7360	ILMN_1654340
ZBTB4	-0.356198	8.94577	-5.32832	3.56493e-07	6.69284e-06	6.15948	57659	ILMN_1795905
LOC652616	0.873419	10.0216	5.32649	3.59528e-07	6.74187e-06	6.15136	652616	ILMN_1652680
XRCC6	-0.367759	10.4113	-5.32648	3.59535e-07	6.74187e-06	6.15134	2547	ILMN_1743097
MYBPC3	0.587084	8.07861	5.32516	3.6174e-07	6.77917e-06	6.14548	4607	ILMN_1781184
MXD1	0.792619	11.2133	5.32477	3.6239e-07	6.78729e-06	6.14376	4084	ILMN_2214678
LOC100133812	-0.353117	13.6692	-5.32132	3.68223e-07	6.89242e-06	6.12845	100133812	ILMN_3238640
PARL	-0.306213	9.3953	-5.32067	3.69331e-07	6.90902e-06	6.12558	55486	ILMN_1731354
MLKL	0.5622	9.30403	5.3194	3.71499e-07	6.94543e-06	6.11997	197259	ILMN_1667825
LOC100132345	-0.324673	7.11234	-5.31655	3.76428e-07	7.03338e-06	6.10733	100132345	ILMN_3247857
LPGAT1	0.276037	8.08306	5.31577	3.77785e-07	7.05453e-06	6.10388	9926	ILMN_1687998
ST6GALNAC3	0.194476	7.09407	5.31524	3.78715e-07	7.06769e-06	6.10153	256435	ILMN_1779061
LOC285053	-0.357945	13.1497	-5.31467	3.79717e-07	7.08217e-06	6.099	285053	ILMN_1660832
LOC645630	-0.431008	7.7477	-5.31431	3.80339e-07	7.08955e-06	6.09743	645630	ILMN_3288529
EIF2B1	-0.382824	9.25142	-5.31386	3.81133e-07	7.10012e-06	6.09543	1967	ILMN_1753716
CYTH1	-0.289054	10.6656	-5.31197	3.84474e-07	7.15811e-06	6.08706	9267	ILMN_2403852
ATXN7L3	0.489368	9.01923	5.31161	3.85127e-07	7.16602e-06	6.08544	56970	ILMN_1862018
FABP5	0.462656	7.79948	5.31142	3.85457e-07	7.16791e-06	6.08461	2171	ILMN_1696302
ZNF696	-0.322956	7.67145	-5.31002	3.87965e-07	7.21026e-06	6.0784	79943	ILMN_1712517
RAPGEF1	-0.3333	9.22472	-5.30793	3.91726e-07	7.27585e-06	6.06915	2889	ILMN_1678799
RSU1	-0.282054	8.16422	-5.30774	3.92065e-07	7.27782e-06	6.06833	6251	ILMN_1721657
COPA	0.298954	11.0175	5.30737	3.92732e-07	7.28588e-06	6.0667	1314	ILMN_1811615
BTBD2	-0.357049	10.8661	-5.30702	3.93371e-07	7.29342e-06	6.06514	55643	ILMN_3238274
LANCL1	-0.380938	8.53415	-5.30622	3.94828e-07	7.31611e-06	6.0616	10314	ILMN_1703697
PDRG1	-0.326388	8.31763	-5.30603	3.95169e-07	7.31809e-06	6.06077	81572	ILMN_1731720
CLEC5A	0.774409	7.41847	5.30543	3.96257e-07	7.3313e-06	6.05813	23601	ILMN_1780465
KILLIN	-0.332391	7.14901	-5.30538	3.9635e-07	7.3313e-06	6.05791	100144748	ILMN_3238213
GTF2IRD2P	-0.154699	7.15737	-5.30438	3.98185e-07	7.3609e-06	6.05348	401375	ILMN_1746403
OLFM1	-0.171312	6.62962	-5.30323	4.00304e-07	7.39571e-06	6.0484	10439	ILMN_1714709
TYW1	-0.259643	7.95049	-5.30055	4.05297e-07	7.48354e-06	6.03652	55253	ILMN_1736135
LBH	-0.459962	8.94205	-5.30011	4.06116e-07	7.49425e-06	6.03458	81606	ILMN_1660794
MED30	-0.365037	9.34584	-5.29995	4.06412e-07	7.4953e-06	6.03388	90390	ILMN_1671603
KBTBD11	-0.563915	8.6127	-5.29968	4.06913e-07	7.50013e-06	6.0327	9920	ILMN_1784630
ANKIB1	-0.354227	8.63525	-5.29941	4.07422e-07	7.5051e-06	6.03151	54467	ILMN_3241218
M6PRBP1	0.462379	11.8155	5.29719	4.11607e-07	7.57772e-06	6.02171	10226	ILMN_1660021
ETS1	-0.496489	11.8506	-5.2965	4.12929e-07	7.59761e-06	6.01864	2113	ILMN_1687538
LOC100128060	-0.549259	8.96355	-5.29581	4.14251e-07	7.61745e-06	6.01558	100128060	ILMN_3188076
RMI1	0.230713	7.6456	5.29468	4.1641e-07	7.65267e-06	6.0106	80010	ILMN_1668565
SLC37A3	0.342202	7.5448	5.29165	4.22253e-07	7.7555e-06	5.99724	84255	ILMN_1686535
LOC100134688	0.501821	7.67913	5.29064	4.24229e-07	7.78723e-06	5.99277	100134688	ILMN_3235984
PPP2CA	0.249856	10.8848	5.28934	4.26775e-07	7.82937e-06	5.98704	5515	ILMN_1722858
CD58	0.509333	8.60883	5.28917	4.27109e-07	7.83092e-06	5.98629	965	ILMN_1785268
C6orf130	-0.384706	8.63608	-5.28843	4.28574e-07	7.85317e-06	5.98301	221443	ILMN_1804834
TEX264	-0.385295	8.53369	-5.28754	4.30339e-07	7.88091e-06	5.97907	51368	ILMN_1781623
CCDC56	-0.414923	9.30813	-5.28651	4.32384e-07	7.91329e-06	5.97453	28958	ILMN_1789786
GPER	0.527435	7.17805	5.28639	4.32612e-07	7.91329e-06	5.97402	2852	ILMN_1665435
RNF220	-0.389432	9.11323	-5.28598	4.33426e-07	7.92355e-06	5.97222	55182	ILMN_1694504
LOC100132485	-0.218692	7.0101	-5.28317	4.39069e-07	8.02203e-06	5.95983	100132485	ILMN_3241783
TP53I3	0.34387	7.20794	5.2822	4.41047e-07	8.05347e-06	5.95552	9540	ILMN_1651967
C5orf21	-0.272622	8.37692	-5.2816	4.42269e-07	8.0711e-06	5.95287	83989	ILMN_1654542
LOC647988	-0.192571	6.97197	-5.28074	4.44022e-07	8.09836e-06	5.94908	647988	ILMN_3242238
LOC648733	0.314464	7.25183	5.27984	4.45853e-07	8.12702e-06	5.94514	648733	ILMN_1668588
FAM104B	-0.304054	7.19892	-5.27762	4.50439e-07	8.20585e-06	5.93534	90736	ILMN_1705848
NCF1C	0.674774	12.2306	5.27622	4.53343e-07	8.25394e-06	5.92918	654817	ILMN_2112988
LOC729780	-0.228419	7.12274	-5.27492	4.56067e-07	8.29414e-06	5.92344	729780	ILMN_3299682
YWHAE	0.314538	7.6732	5.27491	4.5608e-07	8.29414e-06	5.92341	7531	ILMN_1805536
E2F3	0.438627	9.21772	5.27279	4.60551e-07	8.37059e-06	5.91407	1871	ILMN_1669502
LGTN	-0.410234	8.34818	-5.27222	4.61747e-07	8.38746e-06	5.91158	1939	ILMN_1712487
PIK3R2	-0.556232	9.8051	-5.27087	4.64627e-07	8.4349e-06	5.90563	5296	ILMN_1726565
NME3	-0.452112	9.3458	-5.27003	4.6643e-07	8.46272e-06	5.90192	4832	ILMN_1669456
CDC14A	-0.132811	7.07613	-5.26851	4.69704e-07	8.51718e-06	5.89522	8556	ILMN_1655983
ALKBH2	-0.281572	7.82773	-5.26687	4.73248e-07	8.5765e-06	5.88801	121642	ILMN_1690252
NSUN7	0.383224	7.28975	5.26361	4.80384e-07	8.70077e-06	5.87368	79730	ILMN_1767960
TNFRSF1B	0.462861	11.9981	5.26295	4.81845e-07	8.7222e-06	5.87077	7133	ILMN_1764788
LOC653383	-0.28218	8.12256	-5.26273	4.82343e-07	8.72618e-06	5.86978	653383	ILMN_1806631
LOC100132673	-0.872596	10.9299	-5.25924	4.90123e-07	8.86181e-06	5.85445	100132673	ILMN_3294222
RAC1	0.266158	9.73476	5.25891	4.90864e-07	8.87009e-06	5.85301	5879	ILMN_1652445
TUBA1C	0.440496	11.7537	5.25766	4.93681e-07	8.91585e-06	5.84753	84790	ILMN_1742167
RBM18	0.24463	7.75038	5.25722	4.94679e-07	8.92873e-06	5.84559	92400	ILMN_1802355
MAP3K1	-0.375705	10.6815	-5.25447	5.00975e-07	9.03716e-06	5.83348	4214	ILMN_1723020
CD79A	-0.563898	10.5927	-5.25283	5.04748e-07	9.09998e-06	5.82629	973	ILMN_1659227
LOC401218	-0.262417	7.51116	-5.25216	5.06313e-07	9.12294e-06	5.82333	401218	ILMN_1699451
STK17B	0.376125	8.44916	5.25126	5.08406e-07	9.15386e-06	5.81938	9262	ILMN_1798543
VAMP5	0.810185	11.0208	5.25117	5.08613e-07	9.15386e-06	5.81899	10791	ILMN_1809467
FAR2	0.515833	7.90298	5.2505	5.10172e-07	9.17665e-06	5.81606	55711	ILMN_1694596
FAM174A	-0.343601	7.80654	-5.24799	5.16066e-07	9.27735e-06	5.80505	345757	ILMN_1712577
SH2D3C	0.311353	9.03292	5.24631	5.20052e-07	9.34364e-06	5.79769	10044	ILMN_1674440
FTHL12	0.518827	12.836	5.24611	5.20545e-07	9.34714e-06	5.79678	2504	ILMN_1750278
TOB1	-0.479756	9.07548	-5.24547	5.22062e-07	9.369e-06	5.79399	10140	ILMN_1672004
RPS15A	-0.25242	13.0086	-5.24219	5.29974e-07	9.50555e-06	5.77959	6210	ILMN_1787949
MLYCD	-0.297523	7.32149	-5.24186	5.30775e-07	9.51447e-06	5.77814	23417	ILMN_1651336
C1orf43	0.247262	9.35252	5.24096	5.32968e-07	9.54832e-06	5.77419	25912	ILMN_1660602
TTC17	-0.298131	8.26994	-5.23974	5.35959e-07	9.59642e-06	5.76883	55761	ILMN_1660810
B3GALT6	-0.279744	7.93025	-5.23665	5.4359e-07	9.7275e-06	5.75529	126792	ILMN_1739749
DBN1	0.358334	7.27429	5.23652	5.43911e-07	9.72768e-06	5.75473	1627	ILMN_1757270
NAGPA	-0.342463	8.5615	-5.23621	5.4469e-07	9.73606e-06	5.75336	51172	ILMN_1675266
ACPP	0.353296	7.63781	5.23515	5.47339e-07	9.77783e-06	5.74871	55	ILMN_1758323
LOC642989	-0.883322	10.0871	-5.234	5.50232e-07	9.82392e-06	5.74366	642989	ILMN_1655710
LOC284821	-0.318625	13.417	-5.23373	5.50909e-07	9.82496e-06	5.74249	284821	ILMN_1680208
SOD2	0.829911	11.6226	5.23371	5.50958e-07	9.82496e-06	5.7424	6648	ILMN_1792922
GM2A	0.564173	8.54532	5.2336	5.51231e-07	9.82496e-06	5.74193	2760	ILMN_2221046
NLRP1	-0.237164	7.35924	-5.23326	5.52088e-07	9.83463e-06	5.74044	22861	ILMN_1810045
LOC730284	0.884128	9.14705	5.23277	5.53318e-07	9.85094e-06	5.73831	730284	ILMN_3222402
SDCBP	0.721749	10.5628	5.23027	5.597e-07	9.95891e-06	5.72733	6386	ILMN_2363586
SLC46A2	-0.340214	7.39922	-5.22875	5.63592e-07	1.00225e-05	5.72069	57864	ILMN_1707585
LOC388076	-0.542054	9.29637	-5.22809	5.6531e-07	1.00473e-05	5.71778	388076	ILMN_3206132
LOC399748	0.331953	12.0269	5.22788	5.6583e-07	1.00494e-05	5.7169	399748	ILMN_3284114
PAK2	-0.371261	9.01891	-5.22779	5.66068e-07	1.00494e-05	5.71649	5062	ILMN_1659878
TLR8	0.641651	9.83079	5.22714	5.67754e-07	1.00736e-05	5.71365	51311	ILMN_1657892
MYBL1	-0.296727	7.15969	-5.2257	5.71503e-07	1.0134e-05	5.70734	4603	ILMN_3241046
GNG11	-0.794039	11.1372	-5.22559	5.71803e-07	1.0134e-05	5.70684	2791	ILMN_1782419
C3orf10	-0.359314	9.1785	-5.22364	5.76902e-07	1.02186e-05	5.69834	55845	ILMN_1764500
PLEK	0.533757	12.2167	5.22335	5.77682e-07	1.02266e-05	5.69705	5341	ILMN_1795762
PDLIM7	0.476286	8.15266	5.22322	5.78011e-07	1.02267e-05	5.6965	9260	ILMN_1690125
LOC100131323	-0.194925	7.0399	-5.22281	5.79097e-07	1.02401e-05	5.69471	100131323	ILMN_3203625
PTGDR	-0.320113	7.32798	-5.22157	5.82387e-07	1.02924e-05	5.68928	5729	ILMN_1706268
POLQ	0.345535	7.52204	5.2194	5.88207e-07	1.03895e-05	5.67976	10721	ILMN_1740291
ELAVL1	-0.208953	6.95149	-5.21569	5.98242e-07	1.05607e-05	5.66357	1994	ILMN_1764873
C6orf192	-0.610831	7.95657	-5.21456	6.0133e-07	1.06093e-05	5.65864	116843	ILMN_1669831
DSE	0.329908	7.50689	5.21306	6.05463e-07	1.06762e-05	5.65208	29940	ILMN_1706498
RAB5A	0.37267	8.92652	5.2121	6.08131e-07	1.07172e-05	5.64787	5868	ILMN_1805800
C19orf56	-0.351236	10.7798	-5.21094	6.11371e-07	1.07682e-05	5.64278	51398	ILMN_1757914
FCRLB	0.350854	7.82728	5.20766	6.20574e-07	1.09242e-05	5.62848	127943	ILMN_1782015
ZBTB40	-0.376025	7.64571	-5.20753	6.20943e-07	1.09246e-05	5.62791	9923	ILMN_1784037
NUDT21	-0.27774	7.9492	-5.20671	6.23269e-07	1.09593e-05	5.62433	11051	ILMN_1798886
NDE1	-0.465536	10.1801	-5.2064	6.24162e-07	1.09689e-05	5.62296	54820	ILMN_1739805
HCK	0.68618	11.3029	5.20533	6.27204e-07	1.10162e-05	5.61831	3055	ILMN_1791771
SKAP2	0.503106	9.53904	5.20492	6.28369e-07	1.10304e-05	5.61653	8935	ILMN_1657129
SEPX1	0.695532	12.8905	5.2034	6.32751e-07	1.11011e-05	5.60988	51734	ILMN_1719661
SNORA7B	-0.241452	7.64547	-5.20208	6.36578e-07	1.1162e-05	5.6041	677797	ILMN_1660900
ARHGAP22	-0.181708	6.63423	-5.1995	6.44103e-07	1.12876e-05	5.59286	58504	ILMN_1676361
S100P	1.75875	9.98547	5.19866	6.46559e-07	1.13244e-05	5.58921	6286	ILMN_1801216
RBM47	0.744035	10.1826	5.19798	6.48564e-07	1.13531e-05	5.58625	54502	ILMN_3224926
FGFRL1	0.537896	7.77712	5.19741	6.50245e-07	1.13744e-05	5.58377	53834	ILMN_1795865
LOC441876	-0.23964	14.1951	-5.19733	6.50506e-07	1.13744e-05	5.58339	441876	ILMN_1713394
NAT10	-0.346082	9.48952	-5.19649	6.53e-07	1.14117e-05	5.57972	55226	ILMN_1705594
ZC3H3	0.4271	9.48448	5.19576	6.5516e-07	1.1443e-05	5.57656	23144	ILMN_1702389
MALT1	-0.215621	7.38816	-5.19503	6.57362e-07	1.14751e-05	5.57335	10892	ILMN_1730986
AUTS2	-0.52107	8.6441	-5.19461	6.58596e-07	1.14902e-05	5.57156	26053	ILMN_1749081
TRMT2B	-0.280849	7.60257	-5.19431	6.59509e-07	1.14997e-05	5.57023	79979	ILMN_1779663
TGFBRAP1	-0.39121	7.80041	-5.193	6.63451e-07	1.1562e-05	5.56453	9392	ILMN_1696870
ZNF431	-0.248016	7.02116	-5.19234	6.6545e-07	1.15904e-05	5.56165	170959	ILMN_1804820
YIPF1	0.322109	9.55815	5.19147	6.68082e-07	1.16264e-05	5.55787	54432	ILMN_1803564
POLR3C	-0.380049	8.81294	-5.19138	6.68348e-07	1.16264e-05	5.55749	10623	ILMN_1795678
SLC35A2	0.129226	7.77084	5.19129	6.68626e-07	1.16264e-05	5.55709	7355	ILMN_1742731
UBTD1	0.475981	8.0157	5.19019	6.72001e-07	1.16786e-05	5.55227	80019	ILMN_1794914
RCAN3	-0.309865	7.40361	-5.18934	6.7461e-07	1.17174e-05	5.54856	11123	ILMN_1688299
LOC391075	0.498508	11.0481	5.18905	6.75486e-07	1.17261e-05	5.54732	391075	ILMN_3205656
GSDM1	-0.370238	7.07711	-5.18832	6.77749e-07	1.17589e-05	5.54412	284110	ILMN_2115974
WDR79	-0.346067	7.32218	-5.1864	6.83684e-07	1.18553e-05	5.53577	55135	ILMN_1693669
SBF1	-0.413711	9.89582	-5.18444	6.89811e-07	1.19549e-05	5.52724	6305	ILMN_1703246
LOC100128627	-0.261212	7.30001	-5.18346	6.92894e-07	1.20017e-05	5.52297	100128627	ILMN_3181452
CHP	0.459982	9.50557	5.18282	6.94903e-07	1.20245e-05	5.5202	11261	ILMN_1779401
ZDHHC6	0.222963	9.08983	5.1828	6.94974e-07	1.20245e-05	5.5201	64429	ILMN_1739659
SIRT5	0.217188	7.60682	5.18266	6.95415e-07	1.20255e-05	5.51949	23408	ILMN_1683059
RPS10	-0.221173	13.8284	-5.1825	6.95922e-07	1.20276e-05	5.51879	6204	ILMN_1686954
PTDSS1	-0.359042	10.176	-5.1801	7.03542e-07	1.21526e-05	5.50837	9791	ILMN_1688753
DHRS4	-0.404985	9.04269	-5.17939	7.05829e-07	1.21854e-05	5.50527	10901	ILMN_1762666
PAQR8	-0.414717	8.18686	-5.17863	7.08272e-07	1.22208e-05	5.50196	85315	ILMN_1694589
ASNSD1	-0.415788	9.30283	-5.17834	7.0921e-07	1.22303e-05	5.50069	54529	ILMN_2221673
TBC1D7	0.354199	8.48049	5.17812	7.0992e-07	1.22358e-05	5.49974	51256	ILMN_1661622
BCL2L13	-0.475781	10.101	-5.17669	7.14555e-07	1.23089e-05	5.49351	23786	ILMN_2181445
ZBTB7B	0.237445	7.55269	5.17508	7.19796e-07	1.23923e-05	5.48652	51043	ILMN_1736954
DUSP14	-0.340301	7.57295	-5.17483	7.20615e-07	1.23996e-05	5.48543	11072	ILMN_1666546
CDK2	0.346006	8.00373	5.17213	7.29503e-07	1.25457e-05	5.4737	1017	ILMN_1653443
TNIP2	0.30498	8.17449	5.1712	7.32574e-07	1.25916e-05	5.46968	79155	ILMN_2168933
LOC652624	-0.485192	12.3073	-5.17003	7.36503e-07	1.26522e-05	5.46456	652624	ILMN_1672961
CD274	0.517771	6.96657	5.16685	7.47202e-07	1.2829e-05	5.45076	29126	ILMN_1701914
C7orf27	-0.406556	9.66199	-5.1663	7.49071e-07	1.2854e-05	5.44837	221927	ILMN_1804498
ZBTB20	-0.407361	7.63241	-5.16579	7.50801e-07	1.28766e-05	5.44616	26137	ILMN_1689456
IGF2BP3	0.511851	7.67493	5.16533	7.52367e-07	1.28964e-05	5.44417	10643	ILMN_1807423
DBNDD1	-0.411237	7.61304	-5.16474	7.54399e-07	1.29242e-05	5.44158	79007	ILMN_1757631
LOC647099	-0.237987	13.689	-5.16386	7.57407e-07	1.29686e-05	5.43778	647099	ILMN_3246292
RELL1	-0.227091	7.29052	-5.16286	7.6086e-07	1.30206e-05	5.43342	768211	ILMN_3226955
LOC441087	0.601518	12.6936	5.1607	7.68339e-07	1.31414e-05	5.42407	441087	ILMN_1742163
C9orf102	-0.311122	7.35187	-5.16039	7.69419e-07	1.31527e-05	5.42272	56959	ILMN_1753190
LOC649049	-0.505062	12.42	-5.15844	7.76263e-07	1.32625e-05	5.41425	649049	ILMN_1751726
LOC441775	-0.328682	13.9587	-5.15729	7.80304e-07	1.33243e-05	5.40928	441775	ILMN_1695598
FAU	-0.298905	13.6241	-5.15677	7.82138e-07	1.33483e-05	5.40704	2197	ILMN_1664614
BMF	-0.157105	7.12032	-5.15657	7.82876e-07	1.33536e-05	5.40613	90427	ILMN_1695354
LOC642357	-0.422086	13.4138	-5.15551	7.86617e-07	1.34101e-05	5.40157	642357	ILMN_3283155
CPT1A	0.151445	7.14483	5.15377	7.92857e-07	1.35092e-05	5.39401	1374	ILMN_1687589
KLHDC3	-0.323027	10.4463	-5.15148	8.01132e-07	1.36428e-05	5.38408	116138	ILMN_1730940
LOC728554	-0.452876	8.83109	-5.15043	8.04936e-07	1.37001e-05	5.37955	728554	ILMN_1688903
C11orf75	0.682521	10.0622	5.15008	8.06237e-07	1.37148e-05	5.378	56935	ILMN_1798270
RAB40C	-0.30289	9.86912	-5.14813	8.13388e-07	1.38289e-05	5.36955	57799	ILMN_1712705
LOC728014	-0.47031	9.04413	-5.14792	8.14143e-07	1.38343e-05	5.36867	728014	ILMN_1711699
TANK	0.339546	8.28867	5.14735	8.16238e-07	1.38623e-05	5.36621	10010	ILMN_1715069
C21orf51	-0.188487	7.59646	-5.14708	8.17248e-07	1.3872e-05	5.36503	54065	ILMN_1777221
HSPC047	-0.241612	7.30215	-5.14695	8.17733e-07	1.38727e-05	5.36446	29060	ILMN_1726678
FBXL20	0.314355	8.11106	5.14612	8.20821e-07	1.39175e-05	5.36085	84961	ILMN_1754489
MARCKSL1	-0.506121	9.87962	-5.14476	8.25877e-07	1.39957e-05	5.35498	65108	ILMN_1714433
CHMP1A	0.313071	9.35253	5.14297	8.32576e-07	1.41016e-05	5.34725	5119	ILMN_1709439
TARBP1	-0.434713	7.68568	-5.14174	8.37234e-07	1.41728e-05	5.34191	6894	ILMN_1803036
BAT2L	-0.308896	7.96013	-5.14154	8.37993e-07	1.4178e-05	5.34105	84726	ILMN_3247802
CCL3L3	1.07779	8.79629	5.13883	8.48334e-07	1.43452e-05	5.32931	414062	ILMN_2105573
PPM1F	-0.591107	10.469	-5.13846	8.49752e-07	1.43615e-05	5.32772	9647	ILMN_2059535
C10orf32	-0.268626	8.65691	-5.13817	8.5088e-07	1.43728e-05	5.32645	119032	ILMN_1772706
TTC9	-0.222002	7.17164	-5.13698	8.55475e-07	1.44426e-05	5.32129	23508	ILMN_3243117
ZNF580	0.18784	7.41291	5.13639	8.57732e-07	1.44729e-05	5.31877	51157	ILMN_1653310
PILRB	0.320482	7.92887	5.13546	8.61351e-07	1.45262e-05	5.31475	29990	ILMN_1685534
C9orf114	-0.429131	8.80975	-5.13441	8.65476e-07	1.45879e-05	5.31018	51490	ILMN_1803317
FUNDC1	-0.264606	7.89445	-5.13401	8.67023e-07	1.46055e-05	5.30847	139341	ILMN_1728540
NT5C2	0.355393	10.3412	5.1339	8.67455e-07	1.46055e-05	5.30799	22978	ILMN_1682165
C1RL	0.505971	8.38017	5.13327	8.69924e-07	1.46392e-05	5.30527	51279	ILMN_1733288
FAM65A	-0.442295	9.56723	-5.13246	8.73111e-07	1.46849e-05	5.30178	79567	ILMN_1680037
TOM1	0.466598	9.68125	5.12898	8.86958e-07	1.49098e-05	5.28673	10043	ILMN_1813148
PLSCR3	-0.362454	11.9767	-5.12871	8.8802e-07	1.49197e-05	5.28558	57048	ILMN_1703433
SDCCAG3	-0.291407	8.2227	-5.12731	8.93668e-07	1.50065e-05	5.27952	10807	ILMN_1803997
PPTC7	-0.453229	8.6589	-5.12704	8.94773e-07	1.5017e-05	5.27834	160760	ILMN_1800855
TBC1D2	0.403944	8.34997	5.12451	9.05047e-07	1.51813e-05	5.26742	55357	ILMN_1769876
KCNJ2	0.850961	9.39651	5.12382	9.07887e-07	1.52157e-05	5.26442	3759	ILMN_1780334
FAM113B	-0.524711	11.0376	-5.12377	9.08068e-07	1.52157e-05	5.26423	91523	ILMN_1712431
ZDHHC17	0.306101	8.26515	5.12335	9.09799e-07	1.52366e-05	5.26241	23390	ILMN_1697153
LSM7	-0.397808	10.7819	-5.12301	9.11173e-07	1.52514e-05	5.26097	51690	ILMN_1678165
ACTA2	0.66995	9.09142	5.1227	9.12474e-07	1.52651e-05	5.2596	59	ILMN_1671703
ATP6V1C1	0.362978	7.37905	5.12218	9.14615e-07	1.52927e-05	5.25736	528	ILMN_1659801
IER3	0.978749	9.39614	5.12173	9.16487e-07	1.53158e-05	5.2554	8870	ILMN_1682717
LOC731314	0.554413	8.83043	5.11901	9.27769e-07	1.54961e-05	5.2437	731314	ILMN_1785756
CCDC15	-0.418926	7.63012	-5.11878	9.28751e-07	1.55043e-05	5.24269	80071	ILMN_1783676
SEMA4D	-0.287521	11.6202	-5.11676	9.37243e-07	1.56377e-05	5.23399	10507	ILMN_1687533
TRIP13	0.446959	7.64701	5.11492	9.45051e-07	1.57596e-05	5.22605	9319	ILMN_1796589
EIF3B	-0.343308	10.6392	-5.11318	9.52516e-07	1.58756e-05	5.21853	8662	ILMN_1715636
ZHX3	-0.254138	7.30095	-5.11188	9.58128e-07	1.59606e-05	5.21291	23051	ILMN_1774387
ERCC1	-0.263916	8.29723	-5.11039	9.64578e-07	1.60596e-05	5.2065	2067	ILMN_1652369
USE1	-0.277195	7.30909	-5.1085	9.72814e-07	1.61881e-05	5.19837	55850	ILMN_1664243
NR3C2	-0.188933	7.15422	-5.10774	9.76132e-07	1.62347e-05	5.19511	4306	ILMN_1661777
PPM1M	0.31526	10.5806	5.10686	9.80039e-07	1.6291e-05	5.19129	132160	ILMN_1657810
PAPD5	-0.362249	8.84157	-5.10647	9.81758e-07	1.63109e-05	5.18961	64282	ILMN_1710571
SFRS18	0.409596	9.44592	5.10564	9.85425e-07	1.63632e-05	5.18605	25957	ILMN_3224934
UHRF1	0.605744	8.01186	5.10538	9.86581e-07	1.63737e-05	5.18493	29128	ILMN_1786065
KIAA0748	-0.428089	7.85852	-5.10518	9.87476e-07	1.63799e-05	5.18406	9840	ILMN_1690139
POR	0.536409	8.78085	5.10321	9.96292e-07	1.65149e-05	5.17556	5447	ILMN_1677768
LOC730385	0.545844	7.69621	5.10312	9.96671e-07	1.65149e-05	5.1752	730385	ILMN_3243943
CCDC88B	0.373506	8.62291	5.10178	1.00273e-06	1.66065e-05	5.16941	283234	ILMN_1772208
LCP2	0.382941	8.47303	5.09933	1.01382e-06	1.67813e-05	5.15889	3937	ILMN_1658962
TOP2A	0.77087	8.07433	5.09853	1.0175e-06	1.68334e-05	5.15542	7153	ILMN_1686097
IRF2BP2	-0.358156	8.58585	-5.09573	1.0304e-06	1.70377e-05	5.14338	359948	ILMN_1671005
LOC389322	0.289847	8.19977	5.09518	1.03292e-06	1.70705e-05	5.14104	389322	ILMN_3217285
CTNNB1	0.213094	7.40862	5.09488	1.03431e-06	1.70845e-05	5.13975	1499	ILMN_1651617
LOC100130750	-0.17042	7.02403	-5.09366	1.04003e-06	1.71698e-05	5.13448	100130750	ILMN_3177691
SEC31A	-0.332156	8.97325	-5.09331	1.04163e-06	1.71872e-05	5.13301	22872	ILMN_1691409
CDA	0.755589	9.60299	5.09187	1.0484e-06	1.72898e-05	5.12682	978	ILMN_1714592
LOC441124	0.500096	7.91613	5.09068	1.05406e-06	1.73739e-05	5.12167	441124	ILMN_1682912
FLJ45337	-0.436164	7.83133	-5.09052	1.05483e-06	1.73775e-05	5.12097	400754	ILMN_1680388
RABEPK	-0.388795	9.64216	-5.08911	1.0615e-06	1.74782e-05	5.11495	10244	ILMN_1741957
COPS7B	-0.374855	8.67415	-5.08715	1.07089e-06	1.76236e-05	5.10653	64708	ILMN_1784785
C17orf95	-0.241451	8.53111	-5.08517	1.08049e-06	1.77723e-05	5.09799	124512	ILMN_1688727
MBD6	0.480253	9.85888	5.08498	1.08139e-06	1.77776e-05	5.0972	114785	ILMN_1746012
SOCS3	0.746278	7.99501	5.08472	1.08266e-06	1.77829e-05	5.09608	9021	ILMN_1781001
LONRF3	0.133497	6.88992	5.08468	1.08284e-06	1.77829e-05	5.09592	79836	ILMN_1669380
IFITM1	0.486817	13.279	5.08297	1.0912e-06	1.79107e-05	5.08857	8519	ILMN_1801246
EMP1	0.470526	7.263	5.08265	1.09279e-06	1.79275e-05	5.08717	2012	ILMN_1801616
SIGLECP3	-0.165103	6.70798	-5.08008	1.10546e-06	1.81259e-05	5.07615	284367	ILMN_1688672
DEFA4	1.7693	8.39484	5.0799	1.10637e-06	1.81313e-05	5.07537	1669	ILMN_1753347
ASMTL	-0.316979	8.23092	-5.0763	1.12437e-06	1.84166e-05	5.05994	8623	ILMN_1689786
LOC25845	-0.335564	7.61357	-5.07436	1.13423e-06	1.85684e-05	5.0516	25845	ILMN_3239925
LOC401431	-0.208627	7.1197	-5.07188	1.14691e-06	1.87661e-05	5.04098	401431	ILMN_2067682
RASGRP4	0.403037	7.48548	5.07101	1.1514e-06	1.88298e-05	5.03724	115727	ILMN_1688218
TMEM110	0.289147	7.05965	5.0702	1.15558e-06	1.88883e-05	5.03378	375346	ILMN_1705224
C10orf6	-0.339678	8.53795	-5.06966	1.15836e-06	1.89239e-05	5.03148	55719	ILMN_1710207
RNF4	-0.239206	8.80141	-5.06954	1.159e-06	1.89244e-05	5.03095	6047	ILMN_1687941
RNF126	-0.391096	8.51918	-5.06792	1.16744e-06	1.90525e-05	5.02401	55658	ILMN_1669572
BRPF1	-0.292721	9.73371	-5.06661	1.17429e-06	1.91542e-05	5.01842	7862	ILMN_1669308
WDR51A	0.387791	7.93453	5.06647	1.17507e-06	1.9157e-05	5.01779	25886	ILMN_1780667
LOC728207	-0.24944	7.44442	-5.06521	1.18169e-06	1.92549e-05	5.01242	728207	ILMN_3284607
OIP5	0.360104	7.46356	5.06504	1.18263e-06	1.92601e-05	5.01166	11339	ILMN_1759277
TSC22D3	0.473386	10.9892	5.06433	1.18638e-06	1.93112e-05	5.00863	1831	ILMN_1695382
OAT	0.455693	8.90716	5.06183	1.19971e-06	1.9514e-05	4.99795	4942	ILMN_1654441
LOC728728	0.672431	8.10512	5.06177	1.20009e-06	1.9514e-05	4.99766	728728	ILMN_3226260
LOC731915	-0.187721	6.97925	-5.06146	1.20174e-06	1.95308e-05	4.99634	731915	ILMN_3237161
CPD	0.689605	9.08863	5.0608	1.20527e-06	1.9578e-05	4.99353	1362	ILMN_1703074
PNPLA6	0.490173	10.2375	5.05887	1.21577e-06	1.97383e-05	4.98525	10908	ILMN_1799614
KIFAP3	-0.454772	7.94857	-5.05834	1.21863e-06	1.97745e-05	4.983	22920	ILMN_2119224
C15orf23	0.24415	7.60517	5.05724	1.22464e-06	1.98617e-05	4.9783	90417	ILMN_1652008
GNAQ	0.488654	7.98317	5.05527	1.23547e-06	2.0027e-05	4.96988	2776	ILMN_1659923
TROVE2	-0.219274	8.78196	-5.05511	1.23636e-06	2.00311e-05	4.96919	6738	ILMN_1738909
PRPS1	-0.364767	9.4166	-5.0548	1.23811e-06	2.00491e-05	4.96784	5631	ILMN_1667050
CLIC4	0.344536	7.91678	5.05467	1.23884e-06	2.00506e-05	4.96728	25932	ILMN_1671250
UBE2A	0.216326	8.97743	5.05448	1.23989e-06	2.00572e-05	4.96647	7319	ILMN_1681603
ZNF91	-0.559952	8.36558	-5.05394	1.24288e-06	2.00951e-05	4.96417	7644	ILMN_1802053
LOC644029	-0.341957	12.8048	-5.0534	1.24587e-06	2.01331e-05	4.96188	644029	ILMN_1659095
MAFB	0.70059	10.0161	5.05186	1.25447e-06	2.02617e-05	4.9553	9935	ILMN_1764709
WEE1	0.333902	7.69437	5.05168	1.25549e-06	2.02677e-05	4.95452	7465	ILMN_1778561
CCL3L1	0.663362	7.67667	5.05155	1.25625e-06	2.02695e-05	4.95395	6349	ILMN_1747355
SMAGP	-0.20404	7.30664	-5.05036	1.26293e-06	2.03578e-05	4.94888	57228	ILMN_1657429
ALDH1A1	-0.590595	7.85815	-5.05035	1.26302e-06	2.03578e-05	4.94881	216	ILMN_1709348
LAPTM4B	0.668831	8.07471	5.04996	1.26523e-06	2.03829e-05	4.94714	55353	ILMN_1680196
NOL11	-0.384217	9.13014	-5.04953	1.26766e-06	2.04116e-05	4.9453	25926	ILMN_1688971
SAPS3	-0.27492	8.99029	-5.04914	1.26987e-06	2.04363e-05	4.94364	55291	ILMN_1732725
LOC407835	0.299025	8.67434	5.04902	1.27051e-06	2.04363e-05	4.94316	407835	ILMN_1688124
TMEM175	-0.409636	9.77176	-5.04873	1.27217e-06	2.0452e-05	4.94192	84286	ILMN_1654629
SLC25A36	-0.30874	7.55483	-5.04862	1.27278e-06	2.0452e-05	4.94145	55186	ILMN_1766528
TK1	0.761506	8.16236	5.04736	1.28e-06	2.05575e-05	4.93605	7083	ILMN_1806037
LOC391157	-0.294727	7.4229	-5.04717	1.28111e-06	2.05646e-05	4.93522	391157	ILMN_1802963
C5orf30	0.235333	7.37751	5.04689	1.28266e-06	2.05791e-05	4.93406	90355	ILMN_1677292
BCL2L11	0.271276	7.16813	5.0442	1.29822e-06	2.0818e-05	4.92255	10018	ILMN_1766541
LOC729683	-0.354366	7.37753	-5.04369	1.30115e-06	2.08543e-05	4.92039	729683	ILMN_3298163
PLOD2	0.212942	7.06835	5.04319	1.30408e-06	2.08906e-05	4.91824	5352	ILMN_1771599
BRI3P1	0.639589	10.2147	5.04253	1.30795e-06	2.09402e-05	4.91541	730010	ILMN_3253304
KMO	-0.345514	7.61618	-5.04243	1.30851e-06	2.09402e-05	4.915	8564	ILMN_1730917
SLCO4C1	0.429345	7.41336	5.04143	1.31436e-06	2.10231e-05	4.91074	353189	ILMN_1686464
EXOC2	-0.253473	8.27958	-5.04042	1.32031e-06	2.11074e-05	4.90643	55770	ILMN_1731180
LOC731365	-0.364458	12.2216	-5.03968	1.32469e-06	2.11667e-05	4.90326	731365	ILMN_1656662
FNDC3B	0.579183	9.00663	5.03929	1.32701e-06	2.11797e-05	4.90158	64778	ILMN_3178302
ALKBH7	-0.503467	8.87401	-5.03921	1.32748e-06	2.11797e-05	4.90125	84266	ILMN_1761764
ZNF319	0.342733	9.41241	5.0392	1.32754e-06	2.11797e-05	4.90121	57567	ILMN_1711361
SDC4	0.260428	7.10449	5.0356	1.34903e-06	2.15117e-05	4.88586	6385	ILMN_1663042
GALNS	0.346176	7.8176	5.03262	1.36713e-06	2.17893e-05	4.87313	2588	ILMN_1737949
ARSA	0.267195	8.63743	5.03164	1.3731e-06	2.18612e-05	4.86897	410	ILMN_1656477
RNF145	0.378367	8.98647	5.0316	1.37334e-06	2.18612e-05	4.8688	153830	ILMN_1710906
LOC220433	-0.499773	10.4582	-5.03154	1.37374e-06	2.18612e-05	4.86852	220433	ILMN_1795243
PNN	0.42782	8.61054	5.03088	1.37777e-06	2.19143e-05	4.86572	5411	ILMN_1721703
DHCR24	0.382892	7.09783	5.0297	1.38506e-06	2.2019e-05	4.86068	1718	ILMN_1725510
LEF1	-0.689221	10.671	-5.02881	1.39057e-06	2.20955e-05	4.85689	51176	ILMN_1679185
TMEM192	-0.218161	7.44544	-5.02829	1.39376e-06	2.21348e-05	4.8547	201931	ILMN_1780618
C5orf53	-0.303691	7.25154	-5.02635	1.40587e-06	2.23159e-05	4.84644	492311	ILMN_1685854
CTSG	1.49192	8.40367	5.0261	1.40744e-06	2.23294e-05	4.84537	1511	ILMN_1680424
CIRH1A	-0.388519	8.67675	-5.02524	1.41285e-06	2.2404e-05	4.8417	84916	ILMN_1796235
TNFAIP8L1	-0.445754	7.9261	-5.02368	1.42271e-06	2.25489e-05	4.83506	126282	ILMN_1684346
LOC645711	0.733034	7.29321	5.02197	1.43359e-06	2.27098e-05	4.82778	645711	ILMN_1801962
C3orf18	-0.205004	6.84172	-5.02093	1.44024e-06	2.28037e-05	4.82336	51161	ILMN_1728581
LOC646672	-0.354605	7.97337	-5.01928	1.4509e-06	2.29609e-05	4.81632	646672	ILMN_3291413
HCFC1R1	0.302447	8.76433	5.01914	1.45181e-06	2.29637e-05	4.81572	54985	ILMN_1757877
HIF1AN	0.232614	8.0465	5.01501	1.47877e-06	2.33783e-05	4.79814	55662	ILMN_1681812
ID1	0.131509	6.8071	5.01451	1.48202e-06	2.34178e-05	4.79605	3397	ILMN_1664861
MOBK1B	0.529615	9.08831	5.01356	1.48835e-06	2.3506e-05	4.79198	55233	ILMN_2125562
ANXA1	0.548555	11.5733	5.01279	1.49346e-06	2.35727e-05	4.78871	301	ILMN_2184184
MT1H	0.52122	7.14485	5.01269	1.49408e-06	2.35727e-05	4.78831	4496	ILMN_1683923
DOK3	0.415982	7.54928	5.01155	1.50171e-06	2.3672e-05	4.78344	79930	ILMN_1692225
MKLN1	-0.379521	9.43424	-5.01146	1.50231e-06	2.3672e-05	4.78306	4289	ILMN_1742578
MAP3K11	0.369843	8.92366	5.01141	1.50263e-06	2.3672e-05	4.78285	4296	ILMN_1651788
FBLN7	-0.278518	7.093	-5.0094	1.51613e-06	2.38725e-05	4.77432	129804	ILMN_1735743
KIR2DL4	0.856908	8.29478	5.00866	1.52115e-06	2.39396e-05	4.77116	3805	ILMN_1693207
LOC728059	0.532751	8.52205	5.00814	1.52468e-06	2.39831e-05	4.76894	728059	ILMN_3212591
LOC203547	-0.39703	9.27587	-5.0079	1.52632e-06	2.39875e-05	4.76791	203547	ILMN_1682694
TLR10	-0.38647	8.24157	-5.00787	1.52649e-06	2.39875e-05	4.76781	81793	ILMN_1719905
AGPS	0.29069	8.04587	5.00622	1.53775e-06	2.41523e-05	4.76079	8540	ILMN_1698209
RILPL2	0.545274	10.0294	5.00609	1.5386e-06	2.41536e-05	4.76026	196383	ILMN_1678490
SEPHS2	0.357182	9.3333	5.00567	1.54152e-06	2.41873e-05	4.75845	22928	ILMN_1687824
P2RX1	0.603569	8.69759	5.00551	1.54258e-06	2.41917e-05	4.7578	5023	ILMN_1758529
C20orf27	-0.388689	8.8761	-5.00467	1.5484e-06	2.42708e-05	4.7542	54976	ILMN_1697363
[truncated: 29,335 more rows]
