# Supplementary material for: Comparative transcriptomic analysis reveals translationally relevant processes in mouse models of malaria
Source: eLife. 2022 Jan 10;11:e70763. doi: 10.7554/eLife.70763 (PMC8747512; doi:10.7554/eLife.70763)
Supplement: Supplementary file 5. [file elife-70763-supp5.xlsx]

## Sheet: Key
Supplementary File 5 The results of the CHMI microarray dataset differential expression analysis without cell type mixture adjustment
Table Column Names Key
Description: The results of the differential expression Analysis of the CHMI microarray study. logFC values are given relative to the more severe phenotype (when first symptoms developed). This analysis was performed without adjustment for cell type proportion variation.
Gene	Gene symbol
logFC	log fold-change
Pvalue	p-values
FDR	false discovery rate corrected p-values

## Sheet: First symptoms-before infection
Gene	logFC	PValue	FDR
ANXA2P2	0.555324	5.80881e-11	1.95745e-06
FBXL13	-0.556885	1.31058e-10	2.20819e-06
ANXA2	0.517085	2.22139e-10	2.49521e-06
ANXA2P1	0.473911	7.83354e-10	6.59937e-06
RRAS	0.515335	1.7431e-09	8.86383e-06
MIR1200	-0.643308	2.14346e-09	8.86383e-06
RNU7-189P	-1.17835	2.20664e-09	8.86383e-06
KLHDC7B	0.639371	2.5809e-09	8.86383e-06
SLC35A4	0.426283	3.04464e-09	8.86383e-06
HLA-DRB5	0.64636	3.19389e-09	8.86383e-06
PKM	0.393015	3.30263e-09	8.86383e-06
A2M-AS1	-0.792106	3.45386e-09	8.86383e-06
HLA-DRB3	0.497355	3.77652e-09	8.86383e-06
AC096558.1	-0.55352	3.81621e-09	8.86383e-06
IFI6	0.707701	4.03262e-09	8.86383e-06
DKFZp667F0711	-0.786743	4.2086e-09	8.86383e-06
CALR	0.383418	5.81748e-09	1.15316e-05
LOC101927153	-0.773636	6.35221e-09	1.1892e-05
HLA-DRB1	0.509503	6.96301e-09	1.23494e-05
TAS2R14	-0.578364	7.34752e-09	1.23798e-05
TMSB10	0.424667	7.75155e-09	1.24387e-05
TUBBP1	0.34297	8.97919e-09	1.37537e-05
ARHGAP15	-0.610576	1.04993e-08	1.50653e-05
TFG	0.34232	1.11632e-08	1.50653e-05
GOLGA8B	-0.622156	1.11767e-08	1.50653e-05
IL1R1	-0.342986	1.28821e-08	1.58744e-05
STXBP5	-0.510835	1.3677e-08	1.58744e-05
LOC100653061	-0.678934	1.38821e-08	1.58744e-05
TRAJ19	-1.0709	1.40757e-08	1.58744e-05
LOC100287934	-0.399403	1.41323e-08	1.58744e-05
RNU6-1262P	-0.483951	1.479e-08	1.59242e-05
GRN	0.486345	1.56252e-08	1.59242e-05
ATP6V1F	0.358159	1.56311e-08	1.59242e-05
GOLGA8A	-0.616331	1.60669e-08	1.59242e-05
PSME1	0.690521	1.73028e-08	1.66226e-05
LINC00852	-0.405374	1.78008e-08	1.66226e-05
ARL2	0.415614	1.82514e-08	1.66226e-05
RNA5SP214	0.718925	2.02051e-08	1.79176e-05
TPP1	0.40433	2.21694e-08	1.91555e-05
HLA-DPA1	0.616747	2.39069e-08	2.00816e-05
CD74	0.614024	2.44331e-08	2.00816e-05
ANKRD36C	-0.7863	2.58138e-08	2.07112e-05
GUSBP2	-0.673014	2.75818e-08	2.1194e-05
LOC100506123	-0.488134	2.81184e-08	2.1194e-05
SLC43A3	0.466007	2.83022e-08	2.1194e-05
ANKRD20A4	-0.31846	3.1882e-08	2.2606e-05
APOBEC3F	0.307279	3.19224e-08	2.2606e-05
CSRP1	0.327888	3.22004e-08	2.2606e-05
MIR1299	-0.822517	3.65544e-08	2.44344e-05
CECR1	0.506843	3.71074e-08	2.44344e-05
RP11-563N6.6	-0.614654	3.74097e-08	2.44344e-05
IGFLR1	0.330662	3.77052e-08	2.44344e-05
LOC645513	-0.469736	4.00379e-08	2.54565e-05
YWHAG	0.311969	4.14454e-08	2.55661e-05
ZNF767P	-0.353979	4.17276e-08	2.55661e-05
ARSG	-0.320637	4.40145e-08	2.64857e-05
HLA-DRA	0.579636	4.63699e-08	2.74136e-05
GUSBP3	-0.526998	5.14809e-08	2.88465e-05
NUP62	0.384361	5.22321e-08	2.88465e-05
LDHA	0.337519	5.31743e-08	2.88465e-05
TAS2R13	-0.530668	5.46511e-08	2.88465e-05
LUC7L	-0.359705	5.47719e-08	2.88465e-05
ANXA5	0.427753	5.51571e-08	2.88465e-05
LINC00342	-0.454392	5.57587e-08	2.88465e-05
DRAP1	0.299314	5.67501e-08	2.88465e-05
NAPSB	0.538827	5.72323e-08	2.88465e-05
GRAMD1C	-0.724899	5.7354e-08	2.88465e-05
ABCC5	-0.448013	6.09261e-08	3.01924e-05
LIMK1	0.365468	6.38116e-08	3.07379e-05
PLP2	0.320325	6.49994e-08	3.07379e-05
TPMT	0.653812	6.52857e-08	3.07379e-05
TRAJ14	-0.750023	6.56753e-08	3.07379e-05
ABCA5	-0.560746	6.75942e-08	3.11371e-05
DPYSL2	0.448536	6.9496e-08	3.11371e-05
TLR7	1.02893	6.95425e-08	3.11371e-05
DAPK2	-0.449538	7.02243e-08	3.11371e-05
PSMC2	0.350097	7.11497e-08	3.11377e-05
PSMB2	0.318821	7.33838e-08	3.1502e-05
FOXP3	0.290096	7.38518e-08	3.1502e-05
BLOC1S1	0.31687	7.5664e-08	3.156e-05
LOC101928054	-0.578401	7.58608e-08	3.156e-05
RAD51-AS1	-0.367697	7.998e-08	3.27074e-05
PDIA3	0.463435	8.056e-08	3.27074e-05
AHCTF1P1	-0.35361	8.37349e-08	3.33662e-05
HLA-DQA2	0.523047	8.4191e-08	3.33662e-05
SMA5	-0.732976	8.5417e-08	3.33662e-05
ARHGAP17	0.561331	8.63945e-08	3.33662e-05
TNF	0.399484	8.75236e-08	3.33662e-05
FLJ32255	0.673591	8.86532e-08	3.33662e-05
CYCS	0.329232	8.98248e-08	3.33662e-05
CCDC84	-0.329232	9.01041e-08	3.33662e-05
MAFB	0.475078	9.19603e-08	3.36835e-05
TUBA1B	0.390706	9.34549e-08	3.38628e-05
NRAS	0.353223	9.55665e-08	3.40396e-05
SMA4	-0.584602	9.59631e-08	3.40396e-05
ZXDC	-0.274441	9.82499e-08	3.44878e-05
C6orf163	-0.448407	1.0054e-07	3.49276e-05
PRDX1	0.28604	1.02624e-07	3.50287e-05
GUSBP9	-0.621424	1.03705e-07	3.50287e-05
ELK1	0.269758	1.03949e-07	3.50287e-05
ANKRD20A11P	-0.68514	1.05198e-07	3.50988e-05
ANKRD20A3	-0.28043	1.1211e-07	3.67121e-05
VPS25	0.280492	1.12213e-07	3.67121e-05
LOC646652	-0.521527	1.1627e-07	3.76736e-05
MPPE1	-0.284407	1.22335e-07	3.86364e-05
C12orf79	-0.33342	1.23088e-07	3.86364e-05
RNU6-242P	-0.546825	1.24197e-07	3.86364e-05
LDLR	0.380675	1.24829e-07	3.86364e-05
ATP1B3	0.461912	1.25693e-07	3.86364e-05
ERVK13-1	-0.392843	1.26973e-07	3.86364e-05
ITPKB	-0.473342	1.27267e-07	3.86364e-05
RNASET2	-0.36055	1.30725e-07	3.88383e-05
NKTR	-0.536373	1.30984e-07	3.88383e-05
CNTNAP3	-0.644902	1.32505e-07	3.88383e-05
GPBAR1	0.358896	1.32793e-07	3.88383e-05
BANF1	0.38881	1.33695e-07	3.88383e-05
HLA-DRB6	0.395468	1.38707e-07	3.91492e-05
SNORD93	-0.518675	1.39836e-07	3.91492e-05
RELA	0.359529	1.40057e-07	3.91492e-05
TRAJ38	-0.603307	1.41518e-07	3.91492e-05
APOBEC3D	0.284875	1.4252e-07	3.91492e-05
FCN1	0.473658	1.44275e-07	3.91492e-05
MIR604	-0.590582	1.4531e-07	3.91492e-05
RP11-187C18.2	-0.463892	1.46036e-07	3.91492e-05
PLIN3	0.303203	1.4629e-07	3.91492e-05
NPC2	0.621462	1.47242e-07	3.91492e-05
SLC31A1	0.504541	1.49815e-07	3.91492e-05
GPR108	0.263083	1.49915e-07	3.91492e-05
IGF1R	-0.292925	1.50682e-07	3.91492e-05
FLJ10038	-0.491522	1.5103e-07	3.91492e-05
GABPB1-AS1	-0.341928	1.53304e-07	3.93396e-05
CNTNAP3P2	-0.709111	1.54949e-07	3.93396e-05
LGALS3BP	0.80301	1.55266e-07	3.93396e-05
CREBZF	-0.464844	1.56761e-07	3.93634e-05
LOC100133315	-0.225544	1.58313e-07	3.93634e-05
ALG3	0.392046	1.58865e-07	3.93634e-05
TMEM179B	0.456218	1.62354e-07	3.99343e-05
LOC101928020	-0.668308	1.66982e-07	4.07751e-05
TMEM161B-AS1	-0.244529	1.71107e-07	4.14817e-05
IFI30	0.585541	1.73669e-07	4.18022e-05
PSENEN	0.522986	1.78853e-07	4.25545e-05
GM2A	0.651904	1.79835e-07	4.25545e-05
LGALS9	0.64463	1.82873e-07	4.25545e-05
WASH5P	-0.319312	1.85217e-07	4.25545e-05
ACSL5	0.38337	1.85544e-07	4.25545e-05
LINC00893	-0.350468	1.8662e-07	4.25545e-05
DPEP2	-0.583182	1.86865e-07	4.25545e-05
TAS2R64P	-0.359467	1.87581e-07	4.25545e-05
COX8A	0.64961	1.88769e-07	4.25545e-05
RARRES3	0.814652	1.89423e-07	4.25545e-05
RNU6-537P	-0.416429	1.92076e-07	4.26965e-05
C6orf211	0.28989	1.92589e-07	4.26965e-05
NRM	0.276225	1.97015e-07	4.33922e-05
PSMD8	0.347893	1.99603e-07	4.36718e-05
ARCN1	0.305794	2.00876e-07	4.36718e-05
LINC00403	-0.2392	2.02756e-07	4.3798e-05
GPR33	0.453653	2.04897e-07	4.39786e-05
CCNL2	-0.372086	2.09653e-07	4.47145e-05
PLAGL2	0.356538	2.14803e-07	4.55248e-05
ANKRD36B	-0.735154	2.19827e-07	4.61095e-05
SNORD71	-0.809871	2.20586e-07	4.61095e-05
SAMHD1	0.530232	2.21667e-07	4.61095e-05
ANXA4	0.277486	2.27466e-07	4.70254e-05
TAS2R30	-0.791494	2.30633e-07	4.70869e-05
ZNF587	-0.219135	2.31385e-07	4.70869e-05
ARGLU1	-0.44469	2.31955e-07	4.70869e-05
CNTNAP3B	-0.76568	2.33655e-07	4.71479e-05
HCFC1	0.34149	2.36911e-07	4.74851e-05
IL12RB1	0.281011	2.39513e-07	4.74851e-05
E2F3-IT1	-0.459603	2.39798e-07	4.74851e-05
ADHFE1	-0.352528	2.40962e-07	4.74851e-05
RNU105B	-0.379371	2.44656e-07	4.79326e-05
SH2D3C	0.294774	2.50713e-07	4.88354e-05
BST2	0.749239	2.56924e-07	4.97576e-05
MIR623	-0.471767	2.64809e-07	5.09183e-05
GOLGA8F	-0.211592	2.65939e-07	5.09183e-05
IL1R2	-0.62912	2.68666e-07	5.11225e-05
TMCC3	-0.38066	2.7004e-07	5.11225e-05
IL1RAP	-0.417527	2.79147e-07	5.25514e-05
LHX4-AS1	-0.500844	2.8717e-07	5.37614e-05
RP11-10J21.4	-0.679146	2.91882e-07	5.40642e-05
SFI1	-0.24848	2.91996e-07	5.40642e-05
NPHP3-ACAD11	-0.385997	2.94301e-07	5.41932e-05
AL353791.1	-0.815091	2.97522e-07	5.44886e-05
SCAND2P	-0.222259	3.02963e-07	5.4826e-05
RP11-4C20.4	-0.371413	3.03558e-07	5.4826e-05
RP11-504P24.4	-0.496727	3.05426e-07	5.4826e-05
RNASEK	0.32166	3.0642e-07	5.4826e-05
MPDU1	0.26804	3.075e-07	5.4826e-05
RP11-763B22.4	-0.414194	3.18318e-07	5.64562e-05
ANXA2P3	0.426978	3.21406e-07	5.67055e-05
NLRP12	-0.296118	3.25265e-07	5.70875e-05
RP11-509J21.3	-0.297811	3.315e-07	5.78802e-05
ANKRD36	-0.786695	3.40842e-07	5.91849e-05
RNU6-1024P	-0.463005	3.42485e-07	5.91849e-05
DPAGT1	0.261571	3.46944e-07	5.94976e-05
PARP3	0.295628	3.47826e-07	5.94976e-05
PGK1	0.295899	3.51549e-07	5.98307e-05
TYROBP	0.349321	3.54377e-07	5.98483e-05
SCIMP	0.737277	3.55204e-07	5.98483e-05
AOC2	-0.363284	3.59634e-07	6.0293e-05
RP11-395I14.2	-0.474794	3.61629e-07	6.0293e-05
OGT	-0.438357	3.63211e-07	6.0293e-05
GAPDH	0.223512	3.68271e-07	6.08332e-05
ANKZF1	-0.366683	3.86604e-07	6.33338e-05
CD68	0.476775	3.87167e-07	6.33338e-05
TGFB1	0.279742	3.92259e-07	6.34685e-05
SH3BP5-AS1	-0.57869	3.93762e-07	6.34685e-05
ERGIC1	-0.335034	3.93868e-07	6.34685e-05
MIAT	-0.281361	3.95525e-07	6.34685e-05
KIF1C	0.228278	4.06552e-07	6.45311e-05
AC093110.3	-0.445076	4.08269e-07	6.45311e-05
NDUFS8	0.244264	4.08369e-07	6.45311e-05
LRRC37A4P	-0.363692	4.09806e-07	6.45311e-05
SF3B4	0.33264	4.17646e-07	6.54598e-05
RNU6-656P	-0.363214	4.21551e-07	6.57659e-05
CYFIP1	0.328519	4.25357e-07	6.5786e-05
A2M	-0.466	4.26748e-07	6.5786e-05
AGAP4	-0.465901	4.27621e-07	6.5786e-05
SLC38A7	0.234339	4.29489e-07	6.5786e-05
SRPK2	-0.359158	4.46563e-07	6.80918e-05
RNU6-26P	-0.643297	4.49997e-07	6.83064e-05
SNRPB2	0.401834	4.54122e-07	6.86233e-05
SEC31A	0.322504	4.67993e-07	7.03491e-05
TAS2R19	-0.63446	4.69718e-07	7.03491e-05
PSMA6	0.566949	4.73768e-07	7.06417e-05
CUBN	-0.266585	4.82968e-07	7.16925e-05
MIR4451	-0.430646	4.8507e-07	7.16925e-05
RNU6-82P	-0.764761	4.87228e-07	7.16969e-05
SZRD1	0.303866	5.14432e-07	7.47564e-05
RPE	-0.502525	5.16154e-07	7.47564e-05
ELF4	0.382599	5.16717e-07	7.47564e-05
RASGEF1B	0.360601	5.16893e-07	7.47564e-05
SCD	0.331284	5.24841e-07	7.52776e-05
RP11-414H23.3	-0.615932	5.24964e-07	7.52776e-05
NUTF2	0.289284	5.34999e-07	7.63915e-05
LOC100505658	-0.460241	5.43676e-07	7.71402e-05
DUSP5	0.320827	5.44821e-07	7.71402e-05
TRAPPC1	0.367365	5.51363e-07	7.74762e-05
AGAP9	-0.367723	5.51792e-07	7.74762e-05
ARRDC5	-0.396903	5.58829e-07	7.81387e-05
HLA-DRB4	0.316678	5.66834e-07	7.86798e-05
VNN1	-0.379667	5.67369e-07	7.86798e-05
RP11-1026M7.4	-0.479609	5.77996e-07	7.96555e-05
C9orf64	0.246621	5.81117e-07	7.96555e-05
LOC643792	-0.605201	5.81761e-07	7.96555e-05
ARL6IP5	0.290258	5.8386e-07	7.96555e-05
GOLGA6L10	-0.273801	5.88986e-07	8.00308e-05
ARL2-SNX15	0.236114	5.95387e-07	8.05757e-05
MT1HL1	0.380623	6.01482e-07	8.07374e-05
PDIA6	0.214893	6.02524e-07	8.07374e-05
COPE	0.431073	6.0377e-07	8.07374e-05
RP11-175I17.2	-0.316814	6.07613e-07	8.09301e-05
ADAM28	-0.346324	6.16174e-07	8.15291e-05
AMY2A	-0.413702	6.19051e-07	8.15291e-05
STAG3L2	-0.375623	6.19367e-07	8.15291e-05
FKSG29	-0.644154	6.27591e-07	8.22901e-05
SEPT7P9	-0.196704	6.33172e-07	8.27001e-05
CAPN1	0.259356	6.39184e-07	8.3163e-05
PPP4R1	-0.331383	6.44257e-07	8.35007e-05
ANKRD10	-0.282684	6.76612e-07	8.73581e-05
DNAJC15	0.361943	6.79537e-07	8.7401e-05
NSUN7	-0.312508	6.87547e-07	8.75539e-05
AC090627.1	-0.760374	6.88338e-07	8.75539e-05
HLA-DMA	0.555484	6.88521e-07	8.75539e-05
PSME2P2	0.957469	6.91984e-07	8.76481e-05
RNU6-701P	-0.612449	6.94639e-07	8.76481e-05
ARHGDIA	0.328537	6.97065e-07	8.76481e-05
SLC7A5P2	-0.368408	7.04792e-07	8.82808e-05
ANKRD20A5P	-0.369718	7.07336e-07	8.82808e-05
ALDH1A1	0.914447	7.15808e-07	8.90085e-05
NLRP1	-0.423927	7.21833e-07	8.935e-05
PTBP1	0.301868	7.23858e-07	8.935e-05
KIZ	-0.259911	7.35087e-07	9.0405e-05
TTC13	-0.356569	7.43375e-07	9.05817e-05
SCARNA21	-0.344115	7.44426e-07	9.05817e-05
RPGRIP1	-0.271505	7.44588e-07	9.05817e-05
PTPN1	0.309152	7.53435e-07	9.13282e-05
MICB	0.510788	7.65719e-07	9.19798e-05
ETHE1	0.261118	7.68462e-07	9.19798e-05
KIAA1468	-0.371424	7.72719e-07	9.19798e-05
RP11-575L7.8	-0.439715	7.79293e-07	9.19798e-05
SYNGR2	0.293068	7.81385e-07	9.19798e-05
FTX	-0.478325	7.81465e-07	9.19798e-05
AC002117.1	-0.739632	7.83018e-07	9.19798e-05
LINC01032	-0.441434	7.8535e-07	9.19798e-05
KIAA1407	-0.198185	7.85898e-07	9.19798e-05
AP000688.15	-0.223242	7.86106e-07	9.19798e-05
NDUFA2	0.312791	7.91197e-07	9.22552e-05
TOR1A	0.292832	8.09958e-07	9.41171e-05
HSP90AB1	0.444446	8.18873e-07	9.45887e-05
MSMO1	0.357649	8.1963e-07	9.45887e-05
LINC00894	-0.294493	8.22805e-07	9.46311e-05
GOLGA8S	-0.230319	8.39919e-07	9.61219e-05
RNU6-707P	-0.654899	8.41473e-07	9.61219e-05
PLK1S1	-0.244428	8.63193e-07	9.79362e-05
SNORD4B	-0.499249	8.63983e-07	9.79362e-05
MRPS25	-0.317336	8.66075e-07	9.79362e-05
VPS8	-0.393705	8.7103e-07	9.81671e-05
NFE4	-0.474292	8.82428e-07	9.91202e-05
NPHP3	-0.321991	9.12576e-07	0.000102166
RP11-36B15.1	-0.484546	9.2056e-07	0.000102719
TRAJ2	-0.67175	9.24819e-07	0.000102853
BCL3	0.411383	9.28753e-07	0.000102951
STAG3L1	-0.394442	9.42147e-07	0.000104093
OGDH	0.220263	9.58117e-07	0.000105512
APOBEC3C	0.339788	9.80336e-07	0.000107607
AC092652.1	-0.501467	9.924e-07	0.000108578
SNORA70G	-0.372605	9.97111e-07	0.00010874
LOC653653	0.323451	1.02032e-06	0.000110912
ACO2	0.282831	1.02825e-06	0.000111415
RNU6-429P	-0.569647	1.03648e-06	0.000111917
EMR4P	-0.821073	1.04159e-06	0.000111917
SUGP2	-0.278269	1.04285e-06	0.000111917
MIR4518	-0.255884	1.05464e-06	0.000112021
PLCB1-IT1	-0.716313	1.05594e-06	0.000112021
LOC644249	-0.461228	1.05615e-06	0.000112021
RP11-1145L24.1	-0.333401	1.05712e-06	0.000112021
HNRNPF	0.27227	1.07153e-06	0.000112829
LOC101929491	-0.57375	1.07186e-06	0.000112829
AGAP6	-0.480009	1.07479e-06	0.000112829
ZNF516	-0.2613	1.07895e-06	0.000112915
CLK4	-0.465364	1.0936e-06	0.000114093
MAPK1IP1L	0.269152	1.10505e-06	0.00011483
NECAP2	0.240629	1.10915e-06	0.00011483
UBE2Z	0.259504	1.11088e-06	0.00011483
STAG3L3	-0.374957	1.11809e-06	0.000115221
WSB2	0.400677	1.14724e-06	0.000117865
FGFR1OP	-0.292296	1.15439e-06	0.000118239
RRN3P2	-0.379878	1.16514e-06	0.00011861
DNM1P47	-0.509295	1.16563e-06	0.00011861
RNU6-466P	-0.707912	1.16939e-06	0.00011861
LOC100272216	-0.507841	1.17209e-06	0.00011861
ASNA1	0.291247	1.18666e-06	0.000119555
PDZD11	0.251218	1.19186e-06	0.000119555
PZP	-0.295274	1.19208e-06	0.000119555
PSMA2	0.512058	1.20969e-06	0.000119969
TNFAIP3	0.415957	1.21031e-06	0.000119969
LINC01089	-0.397456	1.21041e-06	0.000119969
RNU6-795P	-0.436569	1.21045e-06	0.000119969
TRIM14	0.292409	1.23378e-06	0.000121923
TAPBP	0.35039	1.23921e-06	0.000122039
NSUN5P1	-0.304348	1.24318e-06	0.000122039
AGAP7P	-0.507829	1.24581e-06	0.000122039
MIR421	-0.679616	1.25711e-06	0.000122539
PRCP	0.32586	1.2582e-06	0.000122539
COA6	0.244462	1.26708e-06	0.000122811
GBP4	1.74687	1.26827e-06	0.000122811
HIATL1	0.486503	1.27983e-06	0.000122992
SH2B3	0.270351	1.28219e-06	0.000122992
BLVRA	0.322656	1.28548e-06	0.000122992
ZBTB37	-0.206267	1.28839e-06	0.000122992
LOC101930341	-0.238783	1.28839e-06	0.000122992
ZFP36	0.345249	1.30588e-06	0.000124275
ELMO1-AS1	-0.359926	1.30921e-06	0.000124275
PARP15	-0.440482	1.31566e-06	0.000124537
CTGLF12P	-0.484979	1.32133e-06	0.000124723
AGAP5	-0.331811	1.32658e-06	0.000124869
GUSBP1	-0.337529	1.33935e-06	0.00012572
TAS2R43	-0.444519	1.34617e-06	0.000126009
SPDYE2	-0.355283	1.35697e-06	0.000126461
KIF27	-0.434127	1.35851e-06	0.000126461
PIGL	-0.371414	1.36495e-06	0.000126498
WDR52	-0.232985	1.36641e-06	0.000126498
RNU4-52P	-0.323096	1.37586e-06	0.000127024
TM9SF4	0.269477	1.38398e-06	0.000127424
EMR3	-0.517768	1.39937e-06	0.000128402
GLB1	0.299372	1.40221e-06	0.000128402
HERC2P2	-0.335455	1.43037e-06	0.000130515
LGALS9C	0.492636	1.43304e-06	0.000130515
KIAA0930	0.251956	1.45276e-06	0.000131954
DGCR12	-0.499261	1.46964e-06	0.000133129
KCTD12	0.540584	1.49559e-06	0.000134763
CNDP2	0.688566	1.49567e-06	0.000134763
ATP5D	0.455903	1.50439e-06	0.000134949
CYBB	0.683893	1.50575e-06	0.000134949
LOC102724190	-0.394293	1.51493e-06	0.000135411
PFN1	0.318238	1.52363e-06	0.000135829
CYP51A1	0.32306	1.53529e-06	0.000136507
HIST2H2AC	0.257082	1.54008e-06	0.000136573
ATP2A2	0.296439	1.55419e-06	0.000137463
GOLGA8I	-0.253252	1.57058e-06	0.000138548
AGPAT3	0.308352	1.57865e-06	0.000138896
RNU6-1094P	-0.403731	1.59911e-06	0.000140257
DNAH1	-0.253875	1.60569e-06	0.000140257
LYPLA2	0.224025	1.6066e-06	0.000140257
DIP2A	-0.32715	1.61773e-06	0.000140709
AARS	0.236348	1.62142e-06	0.000140709
UBE2L6	0.938275	1.6243e-06	0.000140709
SNRK-AS1	-0.390604	1.6356e-06	0.000141325
ARF3	0.212908	1.64631e-06	0.000141886
TMED7-TICAM2	0.321023	1.65071e-06	0.000141902
RFK	0.204637	1.65843e-06	0.000142203
LOC374443	-0.264852	1.68618e-06	0.000144215
GNG5	0.27617	1.69712e-06	0.000144784
HSP90AB3P	0.441668	1.72232e-06	0.000146562
ANKRD10-IT1	-0.63036	1.74626e-06	0.000148225
RP11-758M4.4	-0.241255	1.75918e-06	0.000148947
RNU6-455P	-0.405475	1.77056e-06	0.000149534
CCDC97	0.272118	1.87229e-06	0.000157731
TSPAN17	0.248297	1.87933e-06	0.00015793
RP11-83M16.6	-0.328464	1.89378e-06	0.000158109
MAPK8IP3	-0.239462	1.89394e-06	0.000158109
ENO1	0.204141	1.89554e-06	0.000158109
NHEJ1	0.262434	1.90319e-06	0.000158355
CTD-2280E9.1	-0.28599	1.90954e-06	0.000158492
SIRT2	0.198797	1.94882e-06	0.000161355
SDHAP2	-0.258168	1.97422e-06	0.000163057
UBA1	0.239246	2.01001e-06	0.000165607
PLAC8	0.330782	2.03124e-06	0.000166948
AC004562.1	-0.328607	2.05892e-06	0.000168812
MIR581	-0.54073	2.07796e-06	0.000169765
COMMD9	0.272883	2.08315e-06	0.000169765
SCARNA7	-0.629249	2.08566e-06	0.000169765
PNPO	0.321201	2.09759e-06	0.000170324
PSMB3	0.516098	2.12636e-06	0.000172113
GOLGA6L3	-0.223706	2.12983e-06	0.000172113
C5orf15	0.393763	2.13507e-06	0.000172124
VDAC1	0.268232	2.14275e-06	0.00017233
LOC100507419	-0.22381	2.1495e-06	0.000172461
TRAJ25	-0.373571	2.15752e-06	0.000172694
DPEP3	-0.337642	2.1673e-06	0.000172913
GOLGA8T	-0.311558	2.17052e-06	0.000172913
NAGA	0.40493	2.18388e-06	0.000173277
CD209	0.386199	2.1924e-06	0.000173277
PLGLB1	-0.389851	2.19433e-06	0.000173277
SNORA26	-0.443962	2.19566e-06	0.000173277
LTBR	0.231044	2.20095e-06	0.000173288
PRMT5	0.234712	2.20759e-06	0.000173406
APOL3	0.760075	2.23438e-06	0.000175103
TRPM6	-0.361132	2.26317e-06	0.000176342
RGS2	-0.708336	2.26558e-06	0.000176342
GOLGA6L9	-0.275403	2.26589e-06	0.000176342
SLC35G5	-0.220543	2.28085e-06	0.000176468
RNA5SP319	0.527892	2.28296e-06	0.000176468
HIST1H2BK	0.390314	2.28511e-06	0.000176468
CRYGS	-0.369807	2.28846e-06	0.000176468
TTYH3	0.287258	2.29637e-06	0.000176674
OAS2	0.996159	2.31201e-06	0.00017741
RNU6-137P	-0.336802	2.31651e-06	0.00017741
CTC-228N24.3	-0.340258	2.32174e-06	0.00017741
EMP3	0.359261	2.34449e-06	0.000178744
LINC00260	-0.526455	2.35013e-06	0.000178769
LOC100289473	-0.321035	2.40155e-06	0.000182178
LPAL2	-0.304496	2.41113e-06	0.000182178
MME-AS1	-0.543501	2.41117e-06	0.000182178
ADAP2	0.405476	2.42913e-06	0.000183125
GDI2	0.256583	2.48075e-06	0.000186353
C9orf91	0.536693	2.483e-06	0.000186353
CUL1	0.61633	2.52723e-06	0.00018925
HERC2P9	-0.30139	2.55912e-06	0.000190788
PPP1R12B	-0.366221	2.5714e-06	0.000190788
KMO	0.637101	2.5726e-06	0.000190788
CTC-505O3.3	-0.561934	2.5735e-06	0.000190788
EIF4G1	0.249646	2.57607e-06	0.000190788
NDUFAF7	-0.200463	2.60467e-06	0.000192121
KLF7-IT1	-0.476141	2.60548e-06	0.000192121
SLC35F6	0.235963	2.61827e-06	0.000192643
TRIM69	0.293494	2.62909e-06	0.000193018
TCN2	0.415597	2.65516e-06	0.000194508
LSM12	0.317485	2.66195e-06	0.000194582
LY6E	0.691701	2.66852e-06	0.000194596
KIAA0040	0.471311	2.67369e-06	0.000194596
RNU6-47P	-0.587166	2.68278e-06	0.000194837
TARS	0.316912	2.70616e-06	0.000196112
MRPL18	0.25712	2.71726e-06	0.000196494
GDPGP1	0.279528	2.72353e-06	0.000196526
HERC2P3	-0.29532	2.7644e-06	0.000199048
RNU6-833P	-0.368642	2.83764e-06	0.000203886
AC079584.2	-0.291161	2.86015e-06	0.000204649
ERAP2	0.480284	2.8604e-06	0.000204649
ANXA11	-0.246032	2.89064e-06	0.000206375
SNORA49	-0.46627	2.92056e-06	0.00020807
MAK16	0.302164	2.9425e-06	0.000209191
RNA5SP82	-0.380738	2.95284e-06	0.000209484
RCN1	0.289232	2.96397e-06	0.000209832
LOC101928784	-0.262452	2.97093e-06	0.000209884
EZH1	-0.280267	2.99211e-06	0.000210937
CLPTM1	0.275124	3.00315e-06	0.000211274
LOC100126582	-0.297181	3.03441e-06	0.000213028
SPDYE6	-0.424375	3.05266e-06	0.000213864
SCARNA17	-0.449398	3.06978e-06	0.000214617
RNU6-189P	-0.404259	3.07855e-06	0.000214784
ZMAT1	-0.434179	3.08921e-06	0.000215083
RNU6-333P	-0.43109	3.11464e-06	0.000215648
ORMDL1	-0.420294	3.11623e-06	0.000215648
NUCB1	0.46282	3.11854e-06	0.000215648
AGAP8	-0.299266	3.12519e-06	0.000215648
SLFN13	-0.414074	3.13087e-06	0.000215648
RNU6-936P	-0.535232	3.13572e-06	0.000215648
RNU6-169P	-0.33361	3.15017e-06	0.00021581
ATP5SL	0.250527	3.15088e-06	0.00021581
AC004951.6	-0.465325	3.20278e-06	0.000218434
RCC2	0.278903	3.20808e-06	0.000218434
LOC399715	-0.383245	3.20864e-06	0.000218434
RP11-545D19.1	-0.265156	3.21852e-06	0.000218553
SCARNA4	-0.371664	3.22336e-06	0.000218553
RNU6-341P	-0.542501	3.25192e-06	0.000219579
RAB4B	0.227052	3.2602e-06	0.000219579
ACAD11	-0.325566	3.26313e-06	0.000219579
RP11-1018N14.3	-0.475114	3.26725e-06	0.000219579
PDZD8	-0.340975	3.27685e-06	0.000219579
MIR548A1	-0.281922	3.28266e-06	0.000219579
GLYR1	0.317429	3.2841e-06	0.000219579
RNU6-128P	-0.563322	3.31095e-06	0.000220629
SNX20	0.500644	3.31291e-06	0.000220629
RP3-323N1.2	-0.465466	3.34793e-06	0.000222522
SEPN1	0.288284	3.37614e-06	0.000223877
FBXL20	-0.300809	3.38776e-06	0.000223877
CTSH	0.387461	3.38825e-06	0.000223877
RNU6-1152P	-0.706352	3.40282e-06	0.000224221
RNU6-249P	-0.432871	3.40677e-06	0.000224221
LOC100506606	-0.247573	3.42879e-06	0.000225231
SLC7A7	0.40534	3.46402e-06	0.000226739
LOC100507577	-0.504495	3.46843e-06	0.000226739
NAPSA	0.283104	3.47194e-06	0.000226739
SNORA71D	-0.310976	3.48425e-06	0.000227103
LOC100130872	-0.267352	3.49978e-06	0.000227675
STIP1	0.422057	3.51465e-06	0.000228202
RNU6-1330P	-0.296743	3.52702e-06	0.000228565
AHSA2	-0.529336	3.54807e-06	0.000229487
SNORA44	-0.275139	3.55781e-06	0.000229489
ZNF544	-0.21403	3.565e-06	0.000229489
SPDYE5	-0.32973	3.56853e-06	0.000229489
RFX5	0.204203	3.57992e-06	0.000229731
GUSBP11	-0.312334	3.58593e-06	0.000229731
ARL17A	-0.301201	3.60964e-06	0.000230811
GNRH1	-0.253622	3.63916e-06	0.000232237
TAMM41	-0.233561	3.64572e-06	0.000232237
CAPRIN1	0.251833	3.68322e-06	0.000234184
ADAT2	-0.226396	3.70949e-06	0.000235409
ZNF589	-0.256724	3.72053e-06	0.000235666
RP5-837I24.6	-0.22552	3.78917e-06	0.000239564
CCT4	0.326453	3.80177e-06	0.00023991
RNA5SP104	-0.630693	3.8115e-06	0.000240075
MIR3939	-0.475378	3.83419e-06	0.000241054
ARL8A	0.205193	3.84621e-06	0.000241359
COX6B1	0.274072	3.86532e-06	0.00024166
RNU6-820P	-0.572638	3.86535e-06	0.00024166
RNU6-838P	-0.617162	3.88196e-06	0.000242249
TRIM26	0.208587	3.8911e-06	0.00024237
KATNBL1	-0.465358	3.9314e-06	0.000243919
MIR558	-0.388084	3.93387e-06	0.000243919
GOLGA8J	-0.27067	3.93768e-06	0.000243919
RP11-44N11.1	-0.316652	3.95553e-06	0.000244575
MFSD8	-0.231386	4.00641e-06	0.000247267
STAT5A	0.202568	4.04341e-06	0.000249094
LOC101928495	-0.492511	4.07319e-06	0.000250472
PSME2	0.932252	4.09093e-06	0.000251104
CCDC6	0.424069	4.09989e-06	0.000251197
GPR52	-0.546549	4.13969e-06	0.000252865
PLEKHG3	-0.319587	4.14214e-06	0.000252865
IFRD1	-0.37287	4.15934e-06	0.000253457
SH3BGRL3	0.19475	4.1763e-06	0.00025403
GIMAP4	0.363248	4.23337e-06	0.000257038
NR1H2	0.17365	4.26578e-06	0.00025854
IL4I1	0.208491	4.28748e-06	0.000259389
RNU6-1201P	-0.555549	4.2966e-06	0.000259475
HSPB1	0.355308	4.37039e-06	0.000263459
RP4-798A10.2	-0.29098	4.38105e-06	0.00026363
MRPL21	0.224048	4.40707e-06	0.000264723
HSP90AA1	0.43341	4.42821e-06	0.000265519
ZNF586	-0.283	4.44841e-06	0.000266256
MIR4482	-0.346997	4.47374e-06	0.000266721
GPR34	-0.317593	4.47533e-06	0.000266721
MIR571	-0.371241	4.4799e-06	0.000266721
RNU6-226P	-0.812576	4.5309e-06	0.000268929
SNORA54	-0.545111	4.53297e-06	0.000268929
LOC101928139	-0.30579	4.5447e-06	0.000269151
YWHAE	0.255556	4.55674e-06	0.000269391
STARD7	0.312663	4.58503e-06	0.000270247
TMEM184C	0.363326	4.58725e-06	0.000270247
DPP3	0.292341	4.59533e-06	0.00027025
RNPC3	-0.446346	4.62495e-06	0.000271519
JAK3	0.264008	4.66742e-06	0.000273535
LOC284513	-0.341794	4.71374e-06	0.000275373
APPL2	-0.247748	4.71513e-06	0.000275373
SNORD59B	-0.732645	4.72816e-06	0.000275657
C1orf162	0.445695	4.74584e-06	0.00027621
TMEM150B	0.472186	4.77403e-06	0.000277371
FCER1G	0.506054	4.7883e-06	0.000277721
SNORD8	-0.450419	4.79873e-06	0.000277848
SHISA5	0.286261	4.81847e-06	0.000278513
PSMC4	0.312395	4.84213e-06	0.000279089
AC006372.6	-0.306837	4.845e-06	0.000279089
RAB30-AS1	-0.292862	4.87352e-06	0.000280253
ERMN	-0.347199	4.95231e-06	0.000284298
CFP	0.317515	4.97807e-06	0.000285291
SGK1	-0.478415	5.02217e-06	0.000287001
FAM127B	0.243207	5.02495e-06	0.000287001
TP53	0.390097	5.05335e-06	0.000287589
CAPG	0.183779	5.05455e-06	0.000287589
SNORD109B	-0.26043	5.06085e-06	0.000287589
RNU6-486P	-0.324525	5.11046e-06	0.00028992
COPZ1	0.274921	5.15276e-06	0.000290029
MT1H	0.490878	5.1608e-06	0.000290029
ZDHHC12	0.199854	5.16638e-06	0.000290029
GAB3	-0.313358	5.17225e-06	0.000290029
PROSER1	0.313859	5.1763e-06	0.000290029
MIR646	-0.380407	5.17933e-06	0.000290029
RNU6-1031P	-0.454102	5.18056e-06	0.000290029
STS	0.325813	5.18125e-06	0.000290029
KCNQ5-IT1	-0.397597	5.20177e-06	0.000290695
TIMM50	0.223802	5.25823e-06	0.000293149
FAM89A	0.184337	5.26959e-06	0.000293149
PCNX	-0.30494	5.28042e-06	0.000293149
RNF114	0.340001	5.28048e-06	0.000293149
SNORD60	-0.50836	5.3101e-06	0.000294309
RP11-403H13.1	-0.313638	5.32619e-06	0.000294333
PPP1R18	0.180819	5.32801e-06	0.000294333
SMIM14	0.30957	5.35032e-06	0.000294909
SLC6A6	-0.391892	5.35593e-06	0.000294909
HSPBAP1	-0.296983	5.39452e-06	0.000296549
ILK	0.341459	5.40346e-06	0.000296557
RNA5SP33	-0.491128	5.43773e-06	0.000297952
RNU6-949P	-0.609522	5.48137e-06	0.000299856
PIM2	0.401602	5.54688e-06	0.000302596
JAK1	-0.252645	5.54943e-06	0.000302596
EIF5A	0.212983	5.58859e-06	0.00030424
CD37	0.27829	5.6047e-06	0.000304625
RNU6-1316P	-0.581965	5.62246e-06	0.000305098
RNU6-1003P	-0.707649	5.64116e-06	0.000305506
IDH2	0.231202	5.6494e-06	0.000305506
PLBD2	0.25792	5.66387e-06	0.000305506
LGALS1	0.320558	5.66626e-06	0.000305506
RNU6-1016P	-0.782442	5.69984e-06	0.000306718
CMC1	-0.348872	5.70694e-06	0.000306718
DPRXP4	-0.318905	5.7689e-06	0.000308881
SRM	0.322367	5.77293e-06	0.000308881
PRELID1	0.330234	5.77468e-06	0.000308881
ZNRD1-AS1	-0.161647	5.8214e-06	0.000310525
UBE2L3	0.272589	5.82384e-06	0.000310525
RAC2	0.251863	5.84769e-06	0.000311304
LAPTM4A	0.234424	5.88104e-06	0.000312586
PRPS2	0.423952	5.90084e-06	0.000313144
PRDX3	0.354092	5.9133e-06	0.000313312
ALDOA	0.177468	5.94637e-06	0.00031457
RNU6-1043P	-0.350706	5.97146e-06	0.000315402
SNORA14B	-0.466212	6.02412e-06	0.000317685
DCAF7	0.281268	6.04314e-06	0.000317863
NETO2	0.456648	6.04635e-06	0.000317863
SORL1	-0.25846	6.1009e-06	0.000319809
MIR570	-0.462129	6.1057e-06	0.000319809
LINC00299	-0.443613	6.11844e-06	0.000319809
LACC1	0.231102	6.12134e-06	0.000319809
HNRNPH1	-0.308493	6.18374e-06	0.000322569
MYOF	1.49873	6.23357e-06	0.000324666
GCH1	1.25271	6.25012e-06	0.000325025
WAS	0.313293	6.27071e-06	0.000325594
SECTM1	0.843303	6.38783e-06	0.000330901
VAC14	0.224009	6.39256e-06	0.000330901
TRMT11	-0.252278	6.47649e-06	0.000334731
CBR4	-0.235545	6.48768e-06	0.000334796
SPG7	-0.165805	6.55202e-06	0.000337125
RNU4-25P	-0.301736	6.55573e-06	0.000337125
ATP6V0D1	0.285815	6.56281e-06	0.000337125
BX004987.3	-0.268831	6.57772e-06	0.000337376
RNU6-1038P	-0.463061	6.59792e-06	0.000337897
TJP2	0.218353	6.62026e-06	0.000338267
AF121898.3	-0.213976	6.62521e-06	0.000338267
GOLGA8EP	-0.171834	6.66975e-06	0.000340026
RNU6-735P	-0.297672	6.68589e-06	0.000340334
AATF	0.309576	6.72648e-06	0.000341884
RNU6-1018P	-0.340994	6.79338e-06	0.000344589
STAC3	0.24931	6.80016e-06	0.000344589
NBPF16	-0.29	6.81539e-06	0.000344839
DNHD1	-0.192487	6.82555e-06	0.000344839
LOC101928673	-0.351958	6.9171e-06	0.000348941
LRRC37A3	-0.248211	6.96606e-06	0.000350746
M6PR	0.242576	6.98845e-06	0.000350746
RNU6-761P	-0.60288	6.99236e-06	0.000350746
RP11-567N4.3	-0.274935	6.99837e-06	0.000350746
AC069257.8	-0.515369	7.00493e-06	0.000350746
MR1	0.466199	7.04679e-06	0.000351566
LOC101927018	-0.341962	7.05194e-06	0.000351566
CBR1	0.272024	7.05261e-06	0.000351566
ME2	0.334329	7.11378e-06	0.000353576
SNORA23	-0.377992	7.11392e-06	0.000353576
RRN3P1	-0.330881	7.13673e-06	0.000353592
GSTK1	0.30571	7.16355e-06	0.000353592
SNORA70E	-0.349836	7.17802e-06	0.000353592
LINC00921	-0.466508	7.179e-06	0.000353592
POP4	0.2702	7.18088e-06	0.000353592
GPCPD1	-0.486783	7.18208e-06	0.000353592
SNORD58A	-0.920205	7.19163e-06	0.000353592
GNG5P2	0.251257	7.20172e-06	0.000353592
MIR3136	-0.446888	7.20866e-06	0.000353592
LYPLA2P2	0.194864	7.28085e-06	0.000356614
CAPZB	0.220119	7.33644e-06	0.000358815
EPB41L3	0.498606	7.38367e-06	0.000360601
EGR1	0.310395	7.41071e-06	0.000361398
CEP85L	-0.367638	7.44429e-06	0.000362065
ZNF83	-0.24502	7.45403e-06	0.000362065
LOC100190986	-0.619409	7.45662e-06	0.000362065
GABARAPL1	-0.382014	7.50636e-06	0.000363956
SCARNA5	-0.398781	7.51825e-06	0.000364008
TPI1	0.175221	7.55683e-06	0.000365108
APOL6	0.777473	7.56264e-06	0.000365108
MGC72080	-0.243674	7.58964e-06	0.000365888
DNAJA1	0.642358	7.63879e-06	0.000366953
AAED1	0.321823	7.64378e-06	0.000366953
IL2RG	0.260683	7.64441e-06	0.000366953
HSPE1	0.246096	7.68701e-06	0.000368474
ZC3H12A	0.178948	7.70485e-06	0.000368804
NRROS	0.220473	7.74055e-06	0.000369508
SNORD116-29	-0.481813	7.74148e-06	0.000369508
ANKAR	-0.227448	7.85615e-06	0.000374451
SYCP3	-0.288565	7.91175e-06	0.000376076
PSMG2	0.334543	7.91257e-06	0.000376076
CCDC14	-0.258278	8.04952e-06	0.000381075
C20orf197	-0.40397	8.05132e-06	0.000381075
MALAT1	-0.368896	8.05167e-06	0.000381075
DDA1	0.25047	8.07774e-06	0.000381772
RP5-981O7.2	-0.373676	8.12532e-06	0.000383483
NBPF1	-0.278434	8.1547e-06	0.000384017
LINC01355	-0.425046	8.16411e-06	0.000384017
LOC154761	0.353177	8.17082e-06	0.000384017
UBQLN2	0.372555	8.23289e-06	0.0003856
ERICH1	-0.176947	8.24238e-06	0.0003856
ZNF44	-0.199532	8.25398e-06	0.0003856
TUBA1C	0.206082	8.27804e-06	0.0003856
RNU6-774P	-0.428157	8.28341e-06	0.0003856
EMILIN2	0.283996	8.29146e-06	0.0003856
SNORA37	-0.35722	8.30895e-06	0.0003856
SNX29P2	-0.2028	8.30973e-06	0.0003856
CTA-929C8.6	-0.261691	8.31685e-06	0.0003856
RNU6-41P	-0.65238	8.3191e-06	0.0003856
PCGF3	-0.206911	8.3352e-06	0.0003856
IDH3G	0.26801	8.34182e-06	0.0003856
CLCN7	0.228971	8.36939e-06	0.000386345
SLAMF7	0.728406	8.41592e-06	0.000387961
RNU6-797P	-0.507435	8.43816e-06	0.000388455
MIR635	-0.495197	8.45313e-06	0.000388613
SVIL	-0.268451	8.51465e-06	0.000390699
VTA1	0.282827	8.52168e-06	0.000390699
RP11-981G7.2	-0.320322	8.55239e-06	0.000391574
LOC100287497	-0.515955	8.58942e-06	0.000392736
LY75	-0.517689	8.61434e-06	0.000392751
KDELR1	0.326025	8.62034e-06	0.000392751
SLC37A1	0.229055	8.63552e-06	0.000392751
MIR147A	-0.204615	8.63638e-06	0.000392751
LOC100129917	-0.258342	8.70079e-06	0.000395147
AC104088.1	-0.336963	8.71273e-06	0.000395157
RNU6-118P	-0.422075	8.7482e-06	0.000396232
ZNF385A	0.436671	8.76455e-06	0.00039644
LRRC37A	-0.331087	8.86036e-06	0.000400236
SYNE1	-0.517708	8.89311e-06	0.000401178
SPDYE1	-0.265189	8.92685e-06	0.000402162
HIST2H2AA4	0.352705	9.0019e-06	0.000404788
RHBDF2	0.508561	9.01596e-06	0.000404788
NBPF11	-0.311023	9.02118e-06	0.000404788
LOC644450	-0.337017	9.05132e-06	0.0004056
MYD88	0.343508	9.07824e-06	0.000406266
ICAM1	0.848879	9.12521e-06	0.000407651
RNU6-671P	-0.819574	9.13338e-06	0.000407651
RNU6-946P	-0.609694	9.14762e-06	0.000407747
SOCS3	0.421349	9.20674e-06	0.000409616
GNL2	0.2414	9.21386e-06	0.000409616
SMCO4	0.518259	9.26083e-06	0.000411161
RNU6-439P	-0.268247	9.29124e-06	0.000411768
RP1-55C23.7	-0.264117	9.30044e-06	0.000411768
LINC00862	-0.301839	9.31115e-06	0.000411768
LOC100131564	-0.276175	9.36332e-06	0.000413532
MAP4	0.228988	9.39478e-06	0.000414048
FOXP1-IT1	-0.478303	9.39956e-06	0.000414048
MVP	0.428695	9.43291e-06	0.000414974
RNU6-560P	-0.520516	9.4751e-06	0.000416048
SDC3	0.222333	9.49712e-06	0.000416048
MT1F	0.485158	9.51875e-06	0.000416048
RELL1	-0.423678	9.52391e-06	0.000416048
RNU6-879P	-0.389324	9.53431e-06	0.000416048
TRAJ61	-0.429898	9.54e-06	0.000416048
RNU6-263P	-0.415826	9.54392e-06	0.000416048
SNORA76A	-0.510564	9.57193e-06	0.000416048
ADPRH	0.235075	9.57735e-06	0.000416048
PSAP	0.244635	9.58078e-06	0.000416048
RP13-297E16.4	-0.195867	9.75386e-06	0.000423019
CDK2AP2	0.339727	9.86642e-06	0.00042735
RP11-14I17.2	-0.288491	9.89934e-06	0.000427834
APH1A	0.247751	9.90297e-06	0.000427834
RPL32P3	-0.344172	1.00319e-05	0.000432849
LINC00861	-0.446842	1.00863e-05	0.000434638
C5AR2	-0.318023	1.01133e-05	0.000435245
ZDHHC5	0.17619	1.016e-05	0.000436491
PPAP2A	0.339525	1.01681e-05	0.000436491
HSPA8	0.30594	1.02266e-05	0.000438443
STX11	0.852737	1.0316e-05	0.000441714
LOC101929592	-0.219859	1.03529e-05	0.000442731
ALAS1	0.361447	1.03742e-05	0.000443079
LOC389765	-0.333742	1.04621e-05	0.00044627
HSPA5	0.342619	1.0478e-05	0.00044638
RNU6-10P	-0.534168	1.05479e-05	0.000448146
CABLES2	0.196619	1.05481e-05	0.000448146
RP11-553K8.5	-0.50621	1.05593e-05	0.000448146
NCSTN	0.244478	1.05961e-05	0.000449141
FAM212B	-0.362945	1.06736e-05	0.000451859
RASSF1	-0.250518	1.0761e-05	0.000454984
RNU6-378P	-0.433841	1.07853e-05	0.000455005
AP1B1	0.184901	1.07884e-05	0.000455005
RP11-782C8.5	-0.262149	1.08525e-05	0.000457002
RP11-533O20.2	-0.430827	1.08629e-05	0.000457002
SMIM15	0.191971	1.0885e-05	0.000457362
SRSF5	-0.396239	1.09839e-05	0.00046056
RNU6-35P	-0.509595	1.09885e-05	0.00046056
NSUN5P2	-0.249182	1.1004e-05	0.000460639
SMG1P1	-0.476899	1.10581e-05	0.000462289
RNU2-6P	-0.427137	1.10709e-05	0.000462289
GUSBP4	-0.241084	1.10899e-05	0.000462354
MTHFD2	0.644652	1.10999e-05	0.000462354
RNU6-43P	-0.523001	1.11897e-05	0.000465413
LINC00858	-0.18052	1.12009e-05	0.000465413
PIP5K1A	0.261849	1.12361e-05	0.0004663
VAMP1	-0.359951	1.12839e-05	0.000467705
CTNNA1	0.246238	1.13012e-05	0.000467845
ZNF514	-0.199185	1.13164e-05	0.000467845
KIAA1841	-0.170427	1.13289e-05	0.000467845
PTPN6	0.198804	1.13953e-05	0.00047001
ZNF37BP	-0.256507	1.14559e-05	0.000471931
RNU6-891P	-0.315573	1.14736e-05	0.000472085
CTSL	0.306614	1.15661e-05	0.000475025
RNU6-1145P	-0.712456	1.15909e-05	0.000475025
NBPF9	-0.282431	1.15967e-05	0.000475025
RNU6-496P	-0.304683	1.16014e-05	0.000475025
APRT	0.286138	1.16221e-05	0.000475295
ABTB1	-0.340382	1.16924e-05	0.000477581
LAMP1	0.169112	1.17064e-05	0.000477581
MTMR4	0.180538	1.17308e-05	0.000477803
RHOG	0.194924	1.17402e-05	0.000477803
GOLGA8DP	-0.179041	1.18058e-05	0.000479893
HIAT1	0.311114	1.18583e-05	0.000480817
TNS3	0.315224	1.18587e-05	0.000480817
SEC61A2	-0.261567	1.18713e-05	0.000480817
TBRG1	-0.219393	1.18873e-05	0.000480888
CTSD	0.267599	1.19294e-05	0.000481744
C19orf54	0.237655	1.19371e-05	0.000481744
MPEG1	0.38827	1.19688e-05	0.000482445
CD40	0.37454	1.19868e-05	0.000482594
ACTR1A	0.246531	1.2124e-05	0.000487537
RNU6-1077P	-0.322045	1.21538e-05	0.000488149
SIDT2	0.239827	1.22112e-05	0.000489874
DUSP10	0.249359	1.22466e-05	0.000490709
GHRLOS	-0.293012	1.23118e-05	0.000492731
LOC101929979	-0.816263	1.23263e-05	0.000492731
RP11-503E24.2	-0.461294	1.24031e-05	0.000495213
EXT1	0.299096	1.24364e-05	0.000495533
DPY19L3	-0.22079	1.24405e-05	0.000495533
ZNF841	-0.246895	1.24828e-05	0.000495592
ATHL1	-0.271553	1.24848e-05	0.000495592
PSMB5	0.186066	1.24861e-05	0.000495592
MYO9B	-0.169299	1.2512e-05	0.000496037
RNU6-21P	-0.661147	1.25616e-05	0.000497417
RNU6-522P	-0.717056	1.2584e-05	0.000497717
SEPT7P2	-0.204494	1.26477e-05	0.000499196
BMS1P4	-0.240767	1.2651e-05	0.000499196
RNU6-372P	-0.413912	1.2666e-05	0.000499205
GOLGA8M	-0.253824	1.27177e-05	0.000500657
GTF2IRD2	-0.216262	1.27696e-05	0.000502111
TBC1D32	-0.208949	1.28725e-05	0.000505568
GBP7	0.579784	1.29115e-05	0.000506509
RNU6-654P	-0.353745	1.29404e-05	0.000507055
MIR644A	-0.64427	1.29636e-05	0.000507374
IPO5P1	-0.297059	1.30121e-05	0.00050868
PLGLA	-0.274239	1.30433e-05	0.000509309
MVB12A	0.195378	1.32515e-05	0.000516498
OGFR	0.199142	1.32581e-05	0.000516498
MYSM1	-0.286992	1.32765e-05	0.000516619
CNP	0.165236	1.33172e-05	0.000517606
RNU6-842P	-0.636984	1.34664e-05	0.000522619
RP4-535B20.1	-0.240533	1.34772e-05	0.000522619
PTBP2	-0.280116	1.35022e-05	0.000522987
EPM2AIP1	-0.355003	1.35192e-05	0.000523044
TTN	-0.365928	1.35455e-05	0.000523461
LOC100505771	-0.27417	1.3605e-05	0.000524989
RNU6-246P	-0.306186	1.3622e-05	0.000524989
SNRPA	0.228268	1.36318e-05	0.000524989
RNU6-665P	-0.346613	1.37225e-05	0.000526543
ACBD6	-0.230751	1.3725e-05	0.000526543
RNU6-727P	-0.625177	1.37337e-05	0.000526543
SLFN12L	-0.36503	1.37347e-05	0.000526543
MIR4420	-0.377139	1.37724e-05	0.00052739
G6PC3	0.289216	1.39003e-05	0.00053148
GAA	0.213668	1.39253e-05	0.00053148
ULK4	-0.234291	1.39414e-05	0.00053148
RNU6-144P	-0.716864	1.39423e-05	0.00053148
LOC102723927	-0.257754	1.40265e-05	0.000533616
SNORD97	-0.340023	1.403e-05	0.000533616
RNU6-38P	-0.658766	1.40799e-05	0.0005343
SENP1	0.27855	1.41109e-05	0.0005343
RPGR	-0.293292	1.41138e-05	0.0005343
RNU4-78P	-0.438965	1.41328e-05	0.0005343
NPIPB8	-0.291032	1.41457e-05	0.0005343
RNU6ATAC10P	-0.271139	1.41592e-05	0.0005343
TRIM5	0.423847	1.41718e-05	0.0005343
SNHG12	-0.248766	1.41911e-05	0.0005343
RNU6-1306P	-0.310233	1.41955e-05	0.0005343
FKBP1C	0.259452	1.42169e-05	0.0005343
GRB2	0.178637	1.42274e-05	0.0005343
NFKB2	0.207911	1.42722e-05	0.0005343
EEPD1	-0.221363	1.42758e-05	0.0005343
LRRC37A2	-0.329664	1.42792e-05	0.0005343
RAB5C	0.190277	1.42859e-05	0.0005343
MDH2	0.253223	1.44096e-05	0.000537889
RBCK1	0.332856	1.44218e-05	0.000537889
RNU6-166P	-0.645345	1.44297e-05	0.000537889
PSMA4	0.592169	1.45862e-05	0.000543123
P4HB	0.225307	1.46426e-05	0.000544621
HEATR5A	-0.245472	1.46681e-05	0.000544771
SNORD12C	-0.697961	1.4679e-05	0.000544771
HAPLN3	0.358153	1.47722e-05	0.000547627
IFI35	0.871907	1.5004e-05	0.000554499
COX6A1P2	0.242938	1.50153e-05	0.000554499
RP11-464F9.9	-0.384794	1.50224e-05	0.000554499
ASGR2	0.277793	1.50234e-05	0.000554499
POLR2J4	-0.239559	1.52048e-05	0.000560581
DAD1	0.224996	1.52586e-05	0.000561948
YLPM1	-0.37249	1.52929e-05	0.000562597
CIRBP	-0.348162	1.53492e-05	0.000563461
SNORA31	-0.339232	1.53597e-05	0.000563461
LOC389641	0.221639	1.53665e-05	0.000563461
RNU6-647P	-0.750992	1.54085e-05	0.000564199
RP11-666A1.5	-0.263482	1.54201e-05	0.000564199
LTA4H	0.421002	1.54718e-05	0.000564596
TRBV7-3	0.230551	1.54808e-05	0.000564596
CCNJL	-0.271315	1.54812e-05	0.000564596
MIR1183	-0.304937	1.56114e-05	0.000568312
RNU6-564P	-0.308827	1.56169e-05	0.000568312
RNU6-98P	-0.370805	1.56369e-05	0.000568428
C9orf156	-0.209555	1.58261e-05	0.000574686
MT1G	0.481815	1.58827e-05	0.000575788
THUMPD3-AS1	-0.332057	1.58907e-05	0.000575788
ATP6V1G1	0.20522	1.59531e-05	0.000577429
HNRNPM	-0.2393	1.59762e-05	0.000577645
LILRB4	0.306928	1.59942e-05	0.000577661
DNAJC7	0.275989	1.60352e-05	0.000577661
CASS4	-0.390769	1.6036e-05	0.000577661
RNF138	0.242181	1.60452e-05	0.000577661
CCDC125	-0.25907	1.60871e-05	0.000578402
MIR5047	-0.605587	1.61029e-05	0.000578402
ATP6AP2	0.252019	1.61173e-05	0.000578402
PML	0.745956	1.62014e-05	0.000580276
CCT3	0.220732	1.62039e-05	0.000580276
PRKD2	0.229161	1.63002e-05	0.000582153
FBN2	0.225187	1.63044e-05	0.000582153
MIR1270	-0.329302	1.63082e-05	0.000582153
P2RX7	0.686585	1.63277e-05	0.000582232
ABCD1	0.165112	1.64815e-05	0.000587096
NCEH1	0.260459	1.65049e-05	0.00058731
SMG1P2	-0.433065	1.65443e-05	0.000588092
ATP5J2	0.181434	1.66134e-05	0.000589926
CASP7	0.34287	1.67109e-05	0.000592761
TAF1D	-0.335896	1.6758e-05	0.000593809
CHAMP1	0.270365	1.68034e-05	0.000594791
RNU6-1167P	-0.313222	1.68661e-05	0.000596384
MAP1S	0.242255	1.691e-05	0.000597308
GORASP2	0.261888	1.69342e-05	0.00059754
RNU6-1181P	-0.531747	1.69544e-05	0.000597626
MIR1203	-0.261978	1.69852e-05	0.000598083
RNU6-1011P	-0.526477	1.70087e-05	0.000598286
BX571672.2	-0.212052	1.70779e-05	0.000599767
GART	0.238618	1.70977e-05	0.000599767
GNS	0.431136	1.71042e-05	0.000599767
RNU6-658P	-0.439939	1.72238e-05	0.000603336
JUNB	0.240669	1.72944e-05	0.000604793
LOC101929920	-0.206607	1.73152e-05	0.000604793
CTNS	0.152134	1.73193e-05	0.000604793
LOC440173	-0.323967	1.73794e-05	0.000605162
FAM127A	0.268295	1.73805e-05	0.000605162
SNRNP27	0.231537	1.73837e-05	0.000605162
RP3-337D23.3	-0.222942	1.75145e-05	0.000609084
DIP2A-IT1	-0.435578	1.76082e-05	0.000611147
RNU6-44P	-0.596867	1.76101e-05	0.000611147
MPZL3	-0.394698	1.76848e-05	0.000613108
SPATS2L	0.483593	1.77778e-05	0.000615701
RNU6-49P	-0.581247	1.78621e-05	0.000617985
USP30-AS1	0.460753	1.79367e-05	0.00061993
RNU6-228P	-0.233354	1.80622e-05	0.000623553
PMS2L2	-0.239143	1.80786e-05	0.000623553
L3HYPDH	-0.204695	1.81162e-05	0.000624213
SDHC	0.198239	1.8173e-05	0.00062553
GK5	-0.437938	1.82007e-05	0.000625844
RP5-1043L13.1	-0.199059	1.82952e-05	0.000628425
WARS	1.17218	1.8313e-05	0.000628425
ALDH2	0.28776	1.83781e-05	0.000630017
CHCHD2	0.266787	1.84217e-05	0.000630868
FAM127C	0.215977	1.84508e-05	0.000631223
SNORD94	-0.358158	1.85806e-05	0.000634342
TAS2R5	-0.248741	1.85932e-05	0.000634342
RHOA-IT1	-0.273161	1.85984e-05	0.000634342
ANP32A-IT1	-0.549663	1.86878e-05	0.000636745
AC073218.3	-0.479596	1.87608e-05	0.000638163
RNU6-592P	-0.557026	1.87673e-05	0.000638163
EIF2S1	0.234392	1.88037e-05	0.000638759
PRAF2	0.277181	1.88478e-05	0.000639612
RNU6-511P	-0.277451	1.89752e-05	0.000643287
HPS5	0.222123	1.90789e-05	0.000646151
HIP1	-0.220789	1.92021e-05	0.000649673
AHCTF1	-0.296263	1.9271e-05	0.000651347
RP11-434D9.2	-0.36149	1.9296e-05	0.000651539
RFXAP	-0.300371	1.94717e-05	0.000656813
INTS9	0.255967	1.95686e-05	0.000659422
TUBB	0.226987	1.96359e-05	0.00066043
TMEM181	-0.385155	1.96531e-05	0.00066043
MIR548I4	-0.329985	1.96573e-05	0.00066043
RAB32	0.218727	1.97683e-05	0.000663498
RNU6-558P	-0.672601	1.98139e-05	0.000664367
SLC25A24	0.268007	1.99071e-05	0.000666534
TRIM21	0.674597	1.99451e-05	0.000666534
XX-FW81657B9.5	-0.291954	1.99828e-05	0.000666534
SNRNP70	-0.189736	1.9983e-05	0.000666534
SMG1P5	-0.477672	1.99965e-05	0.000666534
AC083843.1	-0.489202	2.00103e-05	0.000666534
RNU6-580P	-0.462261	2.0017e-05	0.000666534
RNU6-214P	-0.233272	2.00373e-05	0.000666553
ZRANB2	-0.305416	2.00653e-05	0.000666826
IDH1	0.274387	2.01024e-05	0.0006674
RNU6-920P	-0.522213	2.0252e-05	0.000671703
TRAF7	0.211461	2.03424e-05	0.00067404
FKBP4	0.439112	2.04294e-05	0.000676257
RNU4-34P	-0.276777	2.04846e-05	0.000676493
ABCF2	0.268921	2.04923e-05	0.000676493
RNU6-97P	-0.563604	2.04968e-05	0.000676493
SLC7A6	-0.255865	2.05853e-05	0.000678751
AMY1B	-0.251788	2.06231e-05	0.000679245
SLC4A1AP	0.242816	2.06406e-05	0.000679245
CDK5	0.198001	2.06793e-05	0.000679855
HSPC081	-0.269049	2.07149e-05	0.000680362
CLIC4	0.325247	2.07603e-05	0.000680684
CLPB	0.175435	2.07651e-05	0.000680684
AC010468.2	-0.434276	2.08244e-05	0.00068173
WASH7P	-0.176152	2.08717e-05	0.00068173
RNU6-584P	-0.33736	2.08895e-05	0.00068173
ANKFY1	0.364857	2.0892e-05	0.00068173
RAB7A	0.251722	2.09012e-05	0.00068173
LINC00173	-0.272915	2.09184e-05	0.00068173
IL31RA	0.469887	2.09735e-05	0.000682498
GOLGA2P5	-0.131167	2.09825e-05	0.000682498
DUSP3	0.388532	2.10359e-05	0.000683575
PILRB	-0.233108	2.1098e-05	0.000684932
METTL7B	0.271586	2.12318e-05	0.000688614
FRY	-0.50075	2.1337e-05	0.000691076
POMP	0.404418	2.13542e-05	0.000691076
UEVLD	0.208006	2.13692e-05	0.000691076
CCR2	0.513856	2.16334e-05	0.000698252
CAMK2G	-0.247298	2.16475e-05	0.000698252
RNU6-281P	-0.262244	2.16533e-05	0.000698252
RNU6-15P	-0.48525	2.17066e-05	0.000699302
ZFAS1	-0.265807	2.17341e-05	0.000699518
SLC2A6	0.237224	2.19075e-05	0.000704428
IDH3A	0.314832	2.19594e-05	0.000705421
NFKBIE	0.267753	2.19806e-05	0.00070543
KLC1	-0.210779	2.20181e-05	0.000705877
MIR1537	-0.529517	2.20364e-05	0.000705877
RP11-362A9.3	-0.297258	2.21618e-05	0.000709219
C8orf44	-0.216464	2.22754e-05	0.000712178
CSTF2T	0.295486	2.23437e-05	0.000713685
TICAM1	0.189675	2.23851e-05	0.000714331
WASH1	-0.209988	2.25177e-05	0.000717882
SCARNA9	-0.465661	2.25423e-05	0.000717987
FAM185A	-0.299265	2.26267e-05	0.000719993
EFHC1	-0.242017	2.2694e-05	0.000720985
CORO1B	0.190994	2.27076e-05	0.000720985
WHAMMP1	-0.313807	2.2722e-05	0.000720985
DLEC1	-0.198681	2.27578e-05	0.00072144
DDX17	-0.277447	2.28684e-05	0.000723688
RNU6-801P	-0.29277	2.28716e-05	0.000723688
NPIPA1	-0.232899	2.29426e-05	0.000724867
NDUFA9	0.232303	2.29519e-05	0.000724867
PPA1	0.278889	2.29803e-05	0.000725084
MSH5	-0.218861	2.31447e-05	0.000728787
RP11-443B7.1	-0.171198	2.31526e-05	0.000728787
BSDC1	-0.191256	2.31625e-05	0.000728787
RNU6-181P	-0.34277	2.34047e-05	0.00073572
FAM66A	-0.154491	2.35826e-05	0.000740131
CITED2	0.300225	2.35923e-05	0.000740131
IRS1	0.18432	2.36109e-05	0.000740131
GBP3	1.103	2.37122e-05	0.000742284
RP11-353N4.1	-0.317173	2.37237e-05	0.000742284
GADD45B	0.549734	2.38266e-05	0.000744445
GALT	-0.254606	2.38369e-05	0.000744445
GJB7	-0.238375	2.38853e-05	0.000745264
CREB3L2	0.208162	2.39147e-05	0.000745492
RNU6-331P	-0.384082	2.40534e-05	0.000749123
ANGPT1	-0.225912	2.41461e-05	0.000751316
GBP1	1.74022	2.4181e-05	0.000751709
FEM1C	0.321108	2.42259e-05	0.00075241
PRPF18	-0.199643	2.43587e-05	0.000755838
MAPK8	-0.195319	2.44117e-05	0.000756786
SLAMF8	1.22297	2.44534e-05	0.000757317
RNU6-358P	-0.772893	2.44738e-05	0.000757317
CES1	0.462684	2.44992e-05	0.000757409
METTL3	-0.217659	2.45657e-05	0.000758768
RNU6-22P	-0.305832	2.46551e-05	0.000760735
GLMN	-0.195487	2.46745e-05	0.000760735
PLXNB2	0.321978	2.4929e-05	0.00076785
UBE2Q2P1	-0.222344	2.49509e-05	0.00076785
LINC00568	-0.207584	2.49869e-05	0.00076811
CXCL10	2.91835	2.5005e-05	0.00076811
MIR3975	-0.569509	2.5054e-05	0.000768917
MTCH2	0.314865	2.54617e-05	0.000780151
RNU6-732P	-0.338018	2.54664e-05	0.000780151
SP2	0.192915	2.56908e-05	0.00078631
STAG3L5P-PVRIG2P-PILRB	-0.244058	2.57314e-05	0.000786838
DKFZP586I1420	-0.263568	2.57633e-05	0.000787099
RNU6-574P	-0.574439	2.5811e-05	0.000787843
DIRC2	-0.30143	2.5874e-05	0.000789052
RNU6-468P	-0.369507	2.59364e-05	0.000790239
C1QBP	0.217526	2.5963e-05	0.000790336
RNU6-1329P	-0.52513	2.59901e-05	0.000790447
MIR548I3	-0.492683	2.60516e-05	0.000791177
LOC100129550	-0.439977	2.60812e-05	0.000791177
FAM106CP	-0.300825	2.60846e-05	0.000791177
RP1-5O6.4	-0.458857	2.62931e-05	0.000796784
LAP3	1.32735	2.63774e-05	0.000798623
TRIM52	-0.231318	2.64472e-05	0.00079964
RNU6-563P	-0.440122	2.65091e-05	0.00079964
MIR1271	-0.434852	2.6513e-05	0.00079964
GIMAP8	0.310837	2.65134e-05	0.00079964
RNU6-1179P	-0.334977	2.65297e-05	0.00079964
OR5A2	0.542199	2.66195e-05	0.00080163
SLMO2-ATP5E	0.235906	2.67956e-05	0.000805571
ZNF672	0.160795	2.67982e-05	0.000805571
STAT1	1.11393	2.68293e-05	0.000805787
TMEM60	0.290551	2.7005e-05	0.000810093
SORT1	0.793689	2.70207e-05	0.000810093
TRAJ1	-0.660083	2.70729e-05	0.000810934
ZC3H3	0.205766	2.71009e-05	0.000811054
GOLGA6L4	-0.208436	2.71334e-05	0.000811306
E2F4	0.227366	2.72557e-05	0.000813842
RNU6-668P	-0.476473	2.72665e-05	0.000813842
LINC00612	-0.437924	2.72959e-05	0.000813999
ELK3	0.26247	2.74011e-05	0.000816414
RNU6-28P	-0.463187	2.75754e-05	0.000820879
MANEA-AS1	-0.458359	2.76653e-05	0.000822108
RP4-794H19.1	-0.189739	2.76933e-05	0.000822108
SNORA46	-0.348797	2.77131e-05	0.000822108
MT2A	0.768024	2.77142e-05	0.000822108
RNU6-40P	-0.43871	2.77936e-05	0.000823152
LRRFIP1	-0.277436	2.78005e-05	0.000823152
RPS26	0.204358	2.78227e-05	0.000823152
CD300C	0.280097	2.79079e-05	0.000824949
RNU6-1248P	-0.695658	2.80376e-05	0.000827326
RP11-14C22.3	-0.229196	2.80477e-05	0.000827326
USP42	0.294901	2.8062e-05	0.000827326
DGCR11	-0.29802	2.81116e-05	0.000828065
WDR73	-0.151539	2.85615e-05	0.00084058
ANKRD20A2	-0.1557	2.87439e-05	0.000843918
MIR449A	0.704634	2.87536e-05	0.000843918
AC003104.1	-0.567134	2.8766e-05	0.000843918
PRR11	0.452867	2.8775e-05	0.000843918
SCAMP2	0.254104	2.88531e-05	0.00084547
TOX4	0.17571	2.88874e-05	0.000845742
RNU6-669P	-0.33332	2.89709e-05	0.000847449
SERPING1	2.33112	2.90786e-05	0.000849862
ADAM1A	-0.273756	2.91942e-05	0.000852163
ATXN2L	0.183071	2.92079e-05	0.000852163
RHOA	0.179007	2.92445e-05	0.000852492
AC114730.7	-0.199265	2.92943e-05	0.000853207
PRPF39	-0.256605	2.97854e-05	0.000865552
KIAA0232	-0.220038	2.98181e-05	0.000865552
RNU6-840P	-0.448329	2.98482e-05	0.000865552
TMCC1	-0.233481	2.98504e-05	0.000865552
HLA-DQB2	0.17129	2.98685e-05	0.000865552
SSB	0.310196	2.98723e-05	0.000865552
KLRAP1	-0.434977	2.9968e-05	0.000867579
RNU6-1171P	-0.484677	2.99999e-05	0.000867757
TDP2	-0.219765	3.01019e-05	0.000869735
RP11-561I11.3	-0.230707	3.01373e-05	0.000869735
PPP1R11P1	0.276118	3.01589e-05	0.000869735
RP11-413E1.4	-0.42175	3.01715e-05	0.000869735
AC073130.3	-0.235418	3.03324e-05	0.000873625
CXCL9	1.36901	3.03584e-05	0.000873626
RP11-499P20.2	-0.227422	3.04056e-05	0.000873679
NBPF3	-0.255741	3.042e-05	0.000873679
SNORA20	-1.15494	3.0438e-05	0.000873679
RP11-472B18.2	0.3195	3.0541e-05	0.000875891
ATP9B	-0.220148	3.09333e-05	0.000886248
ATP10D	0.288004	3.09548e-05	0.000886248
HLA-DMB	0.458155	3.10058e-05	0.000886565
TCF7L2	0.455304	3.109e-05	0.000886565
RNU6-32P	-0.493713	3.10974e-05	0.000886565
RNU6-13P	-0.493713	3.10974e-05	0.000886565
RNU6-12P	-0.493713	3.10974e-05	0.000886565
SKA2	0.200607	3.11372e-05	0.000886667
HLA-DPB1	0.259032	3.11822e-05	0.000886667
LOC100506990	-0.190754	3.11971e-05	0.000886667
RNU1-124P	-0.368256	3.12062e-05	0.000886667
TSPO	0.135421	3.12689e-05	0.000887214
RNU6-589P	-0.647501	3.12884e-05	0.000887214
ODF2L	-0.284089	3.13045e-05	0.000887214
ZNF703	0.241221	3.15295e-05	0.000892842
RP11-893F2.9	-0.228104	3.16285e-05	0.000894892
AC007036.4	-0.196575	3.19582e-05	0.000903463
RNU6-14P	-0.531931	3.20365e-05	0.000903967
CUL2	0.246976	3.20393e-05	0.000903967
MIR4306	-0.218996	3.20565e-05	0.000903967
APOBEC3G	0.225422	3.21061e-05	0.000904607
HLA-DQB1	0.265033	3.21628e-05	0.000905448
RNF5P1	0.264263	3.23133e-05	0.000908926
POLR2J3	-0.19453	3.24048e-05	0.00091044
RNU6-393P	-0.524499	3.24212e-05	0.00091044
TTC17	-0.222958	3.25061e-05	0.000911906
COX5A	0.298334	3.25275e-05	0.000911906
FAM26F	0.329781	3.2578e-05	0.000911996
RP4-798A10.4	0.16619	3.25848e-05	0.000911996
RNU6-809P	-0.242056	3.26736e-05	0.00091331
PANX1	0.254741	3.2686e-05	0.00091331
POLR2K	0.352465	3.28152e-05	0.000916161
HSP90AA4P	0.481794	3.29117e-05	0.000918094
TMEM71	-0.342752	3.29518e-05	0.000918454
KDM1B	0.363104	3.3001e-05	0.000918655
RNU6-1068P	-0.306878	3.30136e-05	0.000918655
GBP1P1	1.58615	3.31105e-05	0.000920592
RNU6-132P	-0.580434	3.31925e-05	0.000922112
BMPR2	0.245434	3.32961e-05	0.000923904
CHMP2A	0.260628	3.3329e-05	0.000923904
RNF185	0.209087	3.33573e-05	0.000923904
GPR82	-0.304472	3.33955e-05	0.000923904
RNU6-33P	-0.479051	3.34214e-05	0.000923904
RNU4ATAC18P	-0.343439	3.34215e-05	0.000923904
NIPSNAP3A	0.272352	3.34678e-05	0.000924424
GARS	0.234135	3.34992e-05	0.000924535
TIFA	1.11935	3.36321e-05	0.000927164
HLA-DPB2	0.425497	3.36495e-05	0.000927164
OS9	0.178904	3.37306e-05	0.000928639
RNU6-1225P	-0.782434	3.38036e-05	0.000929888
CDC42EP4	0.178679	3.39529e-05	0.000933234
TTN-AS1	-0.208427	3.40931e-05	0.000936325
RNU6-1095P	-0.247551	3.42702e-05	0.000939839
KPNA2	0.239489	3.42769e-05	0.000939839
BCOR	0.259499	3.43471e-05	0.000941
AGO4	-0.247837	3.43991e-05	0.000941658
SNORD22	-0.379396	3.45725e-05	0.000945129
TRIM66	-0.176103	3.4582e-05	0.000945129
CLUHP3	-0.155967	3.46618e-05	0.000945845
DTX3L	0.804059	3.46643e-05	0.000945845
UQCRC2	0.263291	3.47665e-05	0.000947865
OR1L3	-0.225661	3.48615e-05	0.000949688
STAG3L4	-0.252562	3.49738e-05	0.000951642
FGD6	0.403625	3.49897e-05	0.000951642
PPP1R3E	-0.207323	3.51228e-05	0.00095449
POLG2	-0.313084	3.51617e-05	0.000954779
PSMD5-AS1	-0.23934	3.52948e-05	0.000957619
MRPL16	0.241398	3.55789e-05	0.000964552
SLC3A2	0.235275	3.56476e-05	0.000964648
AC009229.6	-0.277528	3.56743e-05	0.000964648
RP11-89F3.2	-0.279748	3.57347e-05	0.000964648
RNU6-2	-0.473347	3.57542e-05	0.000964648
RNU6-37P	-0.473347	3.57542e-05	0.000964648
RNU6-11P	-0.473347	3.57542e-05	0.000964648
PSMD11	0.252741	3.59865e-05	0.000970138
RNU6-1	-0.477026	3.60935e-05	0.000972246
ENOSF1	-0.212966	3.61322e-05	0.000972246
TXNDC12	0.247891	3.61512e-05	0.000972246
IKZF2	-0.348391	3.62626e-05	0.000973578
RNA5SP310	-0.28267	3.63098e-05	0.000973578
RNA5SP316	-0.28267	3.63098e-05	0.000973578
COPB2	0.190375	3.63163e-05	0.000973578
RNU6-106P	-0.312993	3.64578e-05	0.000976593
RNU6-737P	-0.652211	3.6529e-05	0.000977211
MTF1	0.426703	3.65388e-05	0.000977211
CLK1	-0.451751	3.68924e-05	0.000985884
RNU6-805P	-0.309357	3.70049e-05	0.000988107
FAM214A	-0.278736	3.71139e-05	0.000990232
SUPT4H1	0.20601	3.71438e-05	0.000990247
MRPS15	0.214058	3.72024e-05	0.000990895
DDX21	0.290404	3.72321e-05	0.000990895
RP11-95P13.1	-0.442511	3.72644e-05	0.000990895
RNU6-202P	-0.458186	3.72857e-05	0.000990895
RNU6-463P	-0.285674	3.7339e-05	0.000991003
CDK5RAP3	-0.231523	3.73486e-05	0.000991003
IKZF4	0.269216	3.75645e-05	0.000995851
CHURC1-FNTB	0.166142	3.76084e-05	0.000995851
ARHGAP31	0.315523	3.762e-05	0.000995851
HIGD2A	0.357812	3.76495e-05	0.000995851
RNU6-24P	-0.484941	3.76831e-05	0.000995958
MTERF4	-0.209872	3.7781e-05	0.000997394
NMT1	0.19286	3.77967e-05	0.000997394
PATL2	-0.233637	3.78545e-05	0.000998138
GOLGA8CP	-0.17159	3.80503e-05	0.00100146
CCDC144B	-0.47682	3.80516e-05	0.00100146
SCARB2	0.42052	3.80698e-05	0.00100146
RNU4-87P	-0.738904	3.82787e-05	0.00100558
CMTM8	0.205685	3.83073e-05	0.00100558
LINC00476	-0.162428	3.83158e-05	0.00100558
MT1JP	0.491972	3.84327e-05	0.00100724
BRWD1	-0.303592	3.84922e-05	0.00100724
EFR3A	0.31885	3.84971e-05	0.00100724
RNU6-1123P	-0.613757	3.85208e-05	0.00100724
RNU6-36P	-0.458568	3.85283e-05	0.00100724
SNORA12	-0.588911	3.86077e-05	0.00100853
DYNLL1	0.189495	3.88229e-05	0.00101337
RNU6-73P	-0.409848	3.88753e-05	0.00101395
RNU6-292P	-0.428772	3.91155e-05	0.00101894
RNU6-509P	-0.314658	3.91271e-05	0.00101894
MRPL53	0.227076	3.92702e-05	0.00102124
RNU4-47P	-0.424571	3.92761e-05	0.00102124
SELL	0.36384	3.94174e-05	0.00102412
RNU6-834P	-0.383127	3.98446e-05	0.00103443
MIR548Q	-0.418934	4.01588e-05	0.00104149
CD63	0.161758	4.01784e-05	0.00104149
RNU6-1019P	-0.481344	4.04009e-05	0.00104645
TMEM176A	0.177317	4.04751e-05	0.00104756
SAMD4A	0.253074	4.0648e-05	0.00105123
MIR3140	-0.623159	4.07575e-05	0.00105314
GBP5	1.65869	4.07841e-05	0.00105314
CALU	0.174428	4.09214e-05	0.00105587
MIR338	-0.34619	4.10148e-05	0.00105747
NSUN6	-0.264356	4.12124e-05	0.00106172
PLB1	-0.321803	4.12425e-05	0.00106172
ZNF26	-0.258867	4.1289e-05	0.00106211
USP30	0.144435	4.13715e-05	0.00106337
GS1-124K5.3	-0.258911	4.14011e-05	0.00106337
MYCBP	0.151187	4.16657e-05	0.00106935
SNORA10	-0.290205	4.1781e-05	0.00107138
TCP1	0.24857	4.18692e-05	0.00107138
MFAP1	0.240646	4.18713e-05	0.00107138
PTPLAD1	0.529526	4.18722e-05	0.00107138
NXT2	0.262201	4.20161e-05	0.00107425
STX5	0.160771	4.20924e-05	0.00107499
MT1X	0.36346	4.2109e-05	0.00107499
LOC100507424	-0.300894	4.22493e-05	0.00107776
APEX2	0.210228	4.24407e-05	0.00108125
LINC00397	-0.195056	4.24504e-05	0.00108125
GSK3A	0.210184	4.26034e-05	0.00108433
LY6G5B	-0.438633	4.27699e-05	0.00108752
AC067945.4	-0.287593	4.27935e-05	0.00108752
SNORA75	-0.43904	4.28395e-05	0.00108787
RNU6-301P	-0.249888	4.2885e-05	0.00108821
KLRC1	-0.564951	4.30248e-05	0.00109093
SP1	0.170525	4.31375e-05	0.00109297
TTTY10	-0.192975	4.33899e-05	0.00109854
RNU6-529P	-0.350218	4.34487e-05	0.00109912
USP18	0.312878	4.34781e-05	0.00109912
SLC25A22	0.144277	4.35298e-05	0.0010996
RNU6-1108P	-0.463479	4.38377e-05	0.00110633
RNU6-31P	-0.641978	4.38617e-05	0.00110633
TM6SF1	-0.310286	4.39294e-05	0.0011072
CHMP1A	0.142682	4.39927e-05	0.00110797
AGO3	-0.190605	4.40342e-05	0.00110819
ZNF638-IT1	-0.538048	4.43303e-05	0.00111481
LINC01004	-0.329713	4.44573e-05	0.00111717
MIR4712	-0.503964	4.44943e-05	0.00111727
PATL1	0.430394	4.47925e-05	0.00112356
NIPA2	0.214116	4.48116e-05	0.00112356
RNU6-18P	-0.458823	4.5114e-05	0.00112946
RNU6-17P	-0.458823	4.5114e-05	0.00112946
KLRC2	-0.62381	4.51844e-05	0.00113038
CLEC2D	-0.408627	4.52474e-05	0.00113112
C3AR1	0.663604	4.54938e-05	0.00113643
CDCA7	0.16169	4.56007e-05	0.0011376
ZNF700	-0.146478	4.5608e-05	0.0011376
PSMB10	0.323513	4.56731e-05	0.0011382
NDUFB8	-0.196503	4.56998e-05	0.0011382
LOC728613	-0.166843	4.58971e-05	0.00114228
PIGG	-0.165746	4.5971e-05	0.00114327
LOC100133050	-0.266691	4.61148e-05	0.00114575
GNB4	0.48444	4.61388e-05	0.00114575
SERPINB9	0.386957	4.62038e-05	0.00114652
CDK4	0.286959	4.62842e-05	0.00114733
HHLA3	0.230456	4.63271e-05	0.00114733
RNF216	-0.187094	4.63384e-05	0.00114733
KLF4	0.168083	4.63956e-05	0.0011479
RPL28	0.16243	4.65373e-05	0.00115056
LOC400590	-0.240695	4.66303e-05	0.00115202
RNU6-510P	-0.494683	4.67702e-05	0.00115462
CHST11	-0.220828	4.70444e-05	0.0011592
RNU6-1331P	-0.364527	4.70504e-05	0.0011592
RNU6-1122P	-0.36915	4.70585e-05	0.0011592
RNU6-729P	-0.409855	4.7168e-05	0.00116104
RNU6-60P	-0.636003	4.73001e-05	0.0011626
IPO4	0.157496	4.73314e-05	0.0011626
LACTB	0.715828	4.73347e-05	0.0011626
LOC101059961	-0.260545	4.73945e-05	0.00116322
HSDL2	-0.206339	4.74398e-05	0.00116348
UBL7-AS1	-0.169625	4.75476e-05	0.00116528
UHRF2	-0.255777	4.76618e-05	0.00116723
INPP4A	-0.207297	4.77441e-05	0.0011684
RNU6-80P	-0.639097	4.77831e-05	0.0011685
HNRNPU-AS1	-0.658272	4.78591e-05	0.00116951
VPREB3	0.383086	4.80558e-05	0.00117316
VNN3	-0.53711	4.80779e-05	0.00117316
CFL1P3	0.267718	4.82219e-05	0.001175
SNORA71B	-0.24129	4.82234e-05	0.001175
CNIH4	0.355819	4.83978e-05	0.00117822
RNU6-780P	-0.372707	4.84252e-05	0.00117822
SRD5A1	0.171439	4.85559e-05	0.00118031
TNFSF13	0.336037	4.85812e-05	0.00118031
RNU6-531P	-0.370259	4.86729e-05	0.00118123
RB1	0.354721	4.86892e-05	0.00118123
DUSP28	-0.159536	4.87844e-05	0.00118269
ADAM19	-0.251919	4.9021e-05	0.00118757
LOC283922	-0.232343	4.92247e-05	0.00119101
SNORD78	-0.577956	4.92337e-05	0.00119101
SNORA70B	-0.3155	4.93584e-05	0.00119317
SNORA71C	-0.322516	4.9415e-05	0.00119368
GRIN3A	0.227944	4.96559e-05	0.00119864
ZNF254	-0.220326	4.99628e-05	0.00120433
CARD6	0.410827	4.99632e-05	0.00120433
SNORD9	-0.295412	5.00155e-05	0.00120473
SNORA5A	-0.298503	5.00911e-05	0.00120569
SNORD12	-0.490759	5.01757e-05	0.00120687
LINC00987	-0.37854	5.04964e-05	0.00121333
CCL2	0.590477	5.05166e-05	0.00121333
CIRH1A	0.301168	5.07961e-05	0.00121905
SNRPD1	0.281457	5.08305e-05	0.00121905
SYCP2	-0.211975	5.08632e-05	0.00121905
NFKB1	0.22164	5.09591e-05	0.00122048
SSBP4	0.177142	5.10663e-05	0.00122218
RP11-124O11.2	-0.284078	5.11426e-05	0.00122314
RP11-278J6.3	-0.610905	5.12908e-05	0.00122581
RNU6-1323P	-0.612687	5.14265e-05	0.00122818
MYADML	0.177756	5.14848e-05	0.00122871
LOC400927	-0.184077	5.16164e-05	0.00123098
RNU4-1	-0.722323	5.17164e-05	0.00123249
WLS	-0.329945	5.18003e-05	0.0012336
CTC-303L1.2	-0.24159	5.18361e-05	0.0012336
LOC100132686	-0.404453	5.20862e-05	0.00123867
C2	0.508383	5.22873e-05	0.00124258
PEA15	0.356657	5.23691e-05	0.00124359
NPL	-0.363452	5.24036e-05	0.00124359
CD99P1	-0.192907	5.27885e-05	0.00125184
AP000345.4	-0.21468	5.30445e-05	0.00125703
SDHAP1	-0.1805	5.33891e-05	0.0012643
AP1G1	0.226037	5.35932e-05	0.00126742
SNORD116-20	-0.708864	5.35958e-05	0.00126742
RNU1-103P	-0.30519	5.36548e-05	0.00126792
CUZD1	-0.145292	5.37491e-05	0.00126926
FCGR1A	2.07603	5.38238e-05	0.00127014
SASH3	0.160441	5.39525e-05	0.00127228
LOC285074	-0.231722	5.44314e-05	0.00128268
SPG20	0.219389	5.45917e-05	0.00128556
SLC16A13	0.173756	5.47543e-05	0.00128849
RAB11FIP2	-0.170728	5.4872e-05	0.00129035
CUTC	-0.19953	5.52226e-05	0.00129715
IL5RA	-0.617039	5.52379e-05	0.00129715
RGS1	0.496999	5.52926e-05	0.00129753
HIST1H3I	0.353481	5.53521e-05	0.00129802
LINC00656	-0.380586	5.54197e-05	0.0012987
RPL23AP82	-0.22906	5.5692e-05	0.00130266
RNU1-80P	-0.161344	5.56943e-05	0.00130266
SNORD46	-0.424265	5.57047e-05	0.00130266
COPG1	0.152503	5.59128e-05	0.00130598
CXCL16	0.324839	5.59241e-05	0.00130598
MAPKAPK3	0.181157	5.5968e-05	0.00130601
PROSC	0.192819	5.60381e-05	0.00130601
ETV7	1.07085	5.60417e-05	0.00130601
INPP5A	-0.183555	5.61315e-05	0.0013072
TRAF3	0.237888	5.62421e-05	0.00130887
PFDN1	0.230371	5.66703e-05	0.00131793
RNU6-623P	-0.432505	5.67191e-05	0.00131815
SLMO2	0.185982	5.68304e-05	0.00131983
TMEM256-PLSCR3	0.32871	5.69383e-05	0.00132089
AC008746.12	-0.530204	5.69632e-05	0.00132089
SNORD116-8	-0.646624	5.69939e-05	0.00132089
HERC2P4	-0.181889	5.72042e-05	0.00132486
PLSCR3	0.286704	5.74224e-05	0.00132849
RNU6-767P	-0.371756	5.74483e-05	0.00132849
RMRP	-0.514599	5.74795e-05	0.00132849
CRYZL1	-0.2112	5.7873e-05	0.00133667
HSPD1	0.247505	5.80296e-05	0.00133937
C5orf45	-0.162221	5.81668e-05	0.00134162
RAC1P2	0.210026	5.84759e-05	0.00134783
TPM3P9	-0.210231	5.85692e-05	0.00134849
RIPK2	0.747038	5.85847e-05	0.00134849
IRF7	0.420438	5.88438e-05	0.00135353
SMARCD3	0.178007	5.89704e-05	0.00135551
RNU6-19P	-0.412637	5.90357e-05	0.00135609
SLC25A19	0.15719	5.97504e-05	0.00137157
AKAP17A	-0.150089	5.99945e-05	0.00137502
HSPA4	0.282162	6.00153e-05	0.00137502
RP11-104L21.2	-0.591462	6.00615e-05	0.00137502
S100A11	0.209993	6.0064e-05	0.00137502
CCR1	0.502076	6.03674e-05	0.00138103
RNU6-616P	-0.263926	6.09117e-05	0.00139254
ZNF763	-0.204806	6.13084e-05	0.00140066
ZBED2	-0.212832	6.14148e-05	0.00140214
RNU6-1297P	-0.29512	6.15535e-05	0.00140323
RNU6-232P	-0.390683	6.15613e-05	0.00140323
RNU6-1318P	-0.275465	6.15876e-05	0.00140323
TBC1D19	-0.225054	6.16734e-05	0.00140424
URM1	0.182452	6.1774e-05	0.00140536
LOC101929331	-0.324113	6.18234e-05	0.00140536
CASZ1	0.173752	6.1848e-05	0.00140536
RNU6-1084P	-0.621087	6.19527e-05	0.00140679
DDX60	0.919907	6.2118e-05	0.0014096
CTSA	0.312013	6.23648e-05	0.00141425
MIR548J	-0.385994	6.24122e-05	0.00141426
LRRC61	0.199574	6.24745e-05	0.00141426
SIAE	0.178093	6.25244e-05	0.00141426
AC100848.1	-0.251098	6.25332e-05	0.00141426
EPHB1	-0.204357	6.2699e-05	0.00141706
KLRC3	-0.703624	6.276e-05	0.00141749
AC107079.1	-0.243707	6.30244e-05	0.00142021
RNF139-AS1	-0.20565	6.30369e-05	0.00142021
RP11-63N8.3	-0.197843	6.30431e-05	0.00142021
NBPF14	-0.231708	6.30594e-05	0.00142021
ZNF266	-0.282206	6.30912e-05	0.00142021
MIR646HG	-0.158092	6.31527e-05	0.00142064
MIF4GD	0.265498	6.326e-05	0.0014221
RP11-414H23.2	-0.238851	6.33851e-05	0.00142357
SNHG1	-0.351369	6.34098e-05	0.00142357
ILF2	0.249753	6.35555e-05	0.00142557
RNU6-1189P	-0.281067	6.35835e-05	0.00142557
RNU6-1340P	-0.388208	6.37285e-05	0.00142787
ATF5	0.221177	6.37877e-05	0.00142825
IFFO1	-0.203875	6.38593e-05	0.00142891
TRAPPC5	0.300813	6.39834e-05	0.00143073
DGAT2	-0.309425	6.42555e-05	0.00143586
PTS	-0.194373	6.43835e-05	0.00143777
ZBED5	-0.192179	6.44315e-05	0.00143785
OAS1	0.906256	6.44725e-05	0.00143785
KY	-0.181502	6.45546e-05	0.00143873
HPS3	0.212729	6.47083e-05	0.0014412
RNU6-979P	-0.635941	6.49862e-05	0.00144644
IL2RA	0.250458	6.53111e-05	0.00145271
ARAP3	-0.242731	6.5655e-05	0.0014594
VAMP5	0.419027	6.59372e-05	0.0014647
LINC00444	-0.212749	6.60126e-05	0.00146541
LIPA	0.306971	6.60712e-05	0.00146561
ITPRIPL2	0.293385	6.6164e-05	0.00146561
AP1S1	0.1304	6.62374e-05	0.00146561
RNU6-268P	-0.372474	6.62378e-05	0.00146561
COX6A1	0.250797	6.62392e-05	0.00146561
FAM193B	-0.170361	6.65216e-05	0.0014709
RNU6-794P	-0.221693	6.66013e-05	0.00147169
ATP5B	0.236667	6.66926e-05	0.00147274
SNORD116-18	-0.708703	6.67581e-05	0.00147322
MOB3A	0.182074	6.69885e-05	0.00147734
SNAP29	0.193149	6.73239e-05	0.00148377
PSMB9	0.52553	6.74682e-05	0.00148598
PDE12	0.215453	6.75721e-05	0.00148729
SEMG1	-0.22861	6.78818e-05	0.00149223
POU5F1P4	-0.200862	6.7885e-05	0.00149223
ZCRB1	0.290951	6.79517e-05	0.00149272
RP11-328K2.1	-0.209598	6.81069e-05	0.00149516
RNU6-42P	-0.377014	6.83558e-05	0.00149964
RNU6-345P	-0.401819	6.84631e-05	0.00150102
RNU6-862P	-0.50531	6.8576e-05	0.00150252
KB-318B8.7	-0.265003	6.8798e-05	0.0015064
AUH	-0.227387	6.89586e-05	0.00150809
NPIPB6	-0.287837	6.89647e-05	0.00150809
MT1E	0.239112	6.90116e-05	0.00150814
RNU6-25P	-0.487186	6.91456e-05	0.00151009
RNU6-1058P	-0.369138	6.92514e-05	0.00151142
MIR378E	-0.389752	6.93138e-05	0.0015118
CCDC144A	-0.313596	6.94404e-05	0.00151358
RPL23AP7	-0.168974	6.9527e-05	0.00151409
PMS2P4	-0.229489	6.95538e-05	0.00151409
SEMA4B	0.189013	6.96296e-05	0.00151409
PIK3AP1	0.483475	6.96435e-05	0.00151409
PSMD3	0.147065	6.97127e-05	0.00151462
ATP8A1	-0.321762	6.99368e-05	0.00151785
RNU6ATAC39P	-0.311159	6.99513e-05	0.00151785
CCDC142	-0.140875	7.01998e-05	0.00152226
RNU6-1157P	-0.462618	7.05476e-05	0.00152882
RNU4-21P	-0.323894	7.07465e-05	0.00153169
ANKRD22	2.59378	7.07711e-05	0.00153169
ACLY	0.219422	7.09187e-05	0.0015339
RP11-25C19.3	-0.354543	7.09761e-05	0.00153416
RNU6-854P	-0.301014	7.11203e-05	0.00153629
ARHGAP26-IT1	-0.39781	7.12462e-05	0.00153802
SLC12A7	0.156514	7.15437e-05	0.0015432
RNU6-677P	-0.512148	7.15774e-05	0.0015432
ANKRD18CP	-0.158747	7.17696e-05	0.00154635
RUVBL2	0.207486	7.18604e-05	0.00154732
RP5-973N23.4	-0.264857	7.2031e-05	0.00155
TBC1D7	-0.150835	7.2761e-05	0.00156471
PPME1	0.201407	7.31954e-05	0.00157082
LINC01183	-0.165383	7.32133e-05	0.00157082
ICT1	0.270369	7.32787e-05	0.00157082
LIN37	0.17927	7.32791e-05	0.00157082
RNU6-1332P	-0.577103	7.32852e-05	0.00157082
ANKRD18B	-0.172637	7.33247e-05	0.00157082
RNU6-868P	-0.605179	7.35342e-05	0.00157417
PLGRKT	0.158254	7.35744e-05	0.00157417
TMEM176B	0.230714	7.36583e-05	0.00157496
RNY5P4	0.2301	7.39624e-05	0.00158046
RNU6-271P	-0.395	7.41003e-05	0.0015824
SMG1P7	-0.419907	7.42349e-05	0.00158427
RNU6-847P	-0.422023	7.43529e-05	0.00158579
RNU6-1079P	-0.280847	7.45099e-05	0.00158741
RNU6-434P	-0.470021	7.45276e-05	0.00158741
SNORD111	-0.649205	7.45702e-05	0.00158741
GRSF1	0.181694	7.46955e-05	0.00158829
ZBTB40-IT1	-0.362002	7.4706e-05	0.00158829
TRBV6-6	0.275159	7.49242e-05	0.00159193
GABARAP	0.281554	7.51239e-05	0.00159516
PARGP1	-0.224688	7.52616e-05	0.00159708
PTEN	-0.464841	7.53559e-05	0.00159808
RPL21P44	-0.422338	7.55849e-05	0.00160192
SNORD116-2	-0.649377	7.57494e-05	0.0016044
PPIAL4B	-0.322134	7.58035e-05	0.00160454
QSOX2	-0.159843	7.59083e-05	0.00160537
MIR1282	-0.22493	7.5938e-05	0.00160537
RBM12B	-0.235579	7.6202e-05	0.00160994
NPIPA8	-0.21178	7.63509e-05	0.00161208
IRS2	-0.618851	7.68605e-05	0.0016204
PAICS	0.243668	7.68625e-05	0.0016204
KCNMB1	0.218946	7.68894e-05	0.0016204
SMYD3-IT1	-0.245299	7.69867e-05	0.00162144
DUSP6	0.32313	7.72828e-05	0.00162665
ITCH-AS1	-0.214533	7.75195e-05	0.00163062
RNU6-34P	-0.437742	7.77545e-05	0.00163454
RNU6-856P	-0.364234	7.78595e-05	0.00163573
SNORA34	-0.408989	7.80088e-05	0.00163785
PLXDC2	0.361874	7.82113e-05	0.00164107
ANKRA2	-0.213692	7.83184e-05	0.0016417
DNAJC8	0.263185	7.83767e-05	0.0016417
AC133528.2	-0.256448	7.83872e-05	0.0016417
MIIP	0.156596	7.86958e-05	0.00164714
GOLGA8O	-0.316419	7.90481e-05	0.00165348
LOC100129936	-0.187294	7.91639e-05	0.00165488
RNU6-39P	-0.443391	7.93176e-05	0.00165706
LSMEM1	-0.320384	7.96118e-05	0.00166218
NLN	0.273878	7.96916e-05	0.00166282
CHTF8	0.208166	7.98358e-05	0.00166479
CHERP	0.216953	7.99294e-05	0.00166571
MGEA5	-0.299482	8.0141e-05	0.00166909
SNORD15B	-0.429912	8.02663e-05	0.00167067
MANSC1	-0.459474	8.03344e-05	0.00167105
SPPL2A	0.362105	8.03837e-05	0.00167105
EMC3-AS1	-0.206936	8.05671e-05	0.00167383
ATP5O	0.218444	8.06271e-05	0.00167404
RNU6-1131P	-0.314335	8.06772e-05	0.00167405
MIR4439	-0.614876	8.08365e-05	0.00167633
MAGT1	0.24844	8.17156e-05	0.00169302
FAM120B	-0.160641	8.17495e-05	0.00169302
SNORD59A	-0.818704	8.17923e-05	0.00169302
SRF	0.200336	8.18794e-05	0.00169378
CRIPAK	-0.325366	8.19984e-05	0.00169509
CUEDC2	0.168535	8.20433e-05	0.00169509
CYP2R1	-0.236581	8.24884e-05	0.00170324
RNU6-380P	-0.276231	8.25437e-05	0.00170334
ACAT2	0.214567	8.28055e-05	0.0017077
EXOSC3	-0.156839	8.31205e-05	0.00171309
SNORD14D	-0.509519	8.31685e-05	0.00171309
ELMO2	0.231138	8.32532e-05	0.00171379
OFD1	-0.238123	8.38252e-05	0.00172451
REEP3	0.261142	8.41123e-05	0.00172936
HAL	-0.428848	8.45155e-05	0.00173659
RNU6-396P	-0.355866	8.45866e-05	0.00173699
ALG1L13P	-0.249092	8.47542e-05	0.00173831
MIR1206	-0.617669	8.47805e-05	0.00173831
CPSF3	0.22527	8.48056e-05	0.00173831
RNU6-29P	-0.484321	8.50491e-05	0.00174152
RNU6-83P	-0.263666	8.50659e-05	0.00174152
TMEM14E	-0.546251	8.51631e-05	0.00174246
PSMB8	0.470149	8.52243e-05	0.00174265
TMEM131	0.310236	8.53346e-05	0.00174385
TFB1M	-0.225383	8.58813e-05	0.00175396
LARP1	0.182449	8.61658e-05	0.0017587
AKR1A1	0.189633	8.70236e-05	0.00177513
MIR1303	-0.268091	8.71762e-05	0.00177717
OLA1	0.219926	8.72642e-05	0.00177789
CYB5R3	0.184925	8.74138e-05	0.00177986
OAS3	1.19629	8.76162e-05	0.00178291
NEDD8	0.224916	8.80872e-05	0.00179141
RNU4-33P	-0.635209	8.8366e-05	0.00179599
RNU6-16P	-0.480092	8.86054e-05	0.00179977
GNLY	-0.592723	8.87042e-05	0.00180069
RNU6-527P	-0.31029	8.88818e-05	0.00180316
MAPK6	0.235927	8.89646e-05	0.00180316
AC004878.7	-0.196544	8.89862e-05	0.00180316
PLA2G7	0.596594	8.90438e-05	0.00180324
PANX2	-0.142481	8.91301e-05	0.00180391
IL1RL1	-0.611582	8.92755e-05	0.00180576
MRVI1-AS1	-0.240969	8.93595e-05	0.00180576
FAM153A	-0.177456	8.93824e-05	0.00180576
TSTA3	0.207728	8.96672e-05	0.00180839
JMJD7	-0.147065	8.97073e-05	0.00180839
MIR1972-1	-0.21868	8.97567e-05	0.00180839
KB-1507C5.3	-0.274495	8.97697e-05	0.00180839
NIN	-0.164308	8.98016e-05	0.00180839
NFKBIB	0.184373	8.98344e-05	0.00180839
SNX18	-0.274594	9.01707e-05	0.00181407
MIR186	-0.559463	9.04814e-05	0.00181918
APOL1	0.764342	9.05408e-05	0.00181918
DEGS1	0.166503	9.05867e-05	0.00181918
RBM23	0.297291	9.07534e-05	0.00182145
AMPD2	-0.248464	9.1103e-05	0.00182738
RNU6-222P	-0.408439	9.14613e-05	0.00183347
APBB3	-0.186886	9.18977e-05	0.00184112
SIK1	0.1799	9.19584e-05	0.00184124
RABGGTA	0.170592	9.24815e-05	0.00184857
MIR1256	-0.448564	9.24927e-05	0.00184857
RNU6-1005P	-0.419752	9.26256e-05	0.00184857
SNORA7B	-0.165598	9.26289e-05	0.00184857
GATS	-0.186303	9.26449e-05	0.00184857
RNU6-1183P	-0.716878	9.26533e-05	0.00184857
RNA5SP513	-0.207921	9.27457e-05	0.00184932
RNU6-1310P	-0.239587	9.33093e-05	0.00185945
ASPHD2	0.260265	9.38279e-05	0.00186868
RNVU1-14	-0.395712	9.43894e-05	0.00187876
RP4-565E6.1	-0.218188	9.48369e-05	0.00188655
POLDIP2	0.186641	9.52469e-05	0.00189359
ATF3	0.355093	9.53354e-05	0.00189423
RNU6-1143P	-0.375437	9.61994e-05	0.00191009
COA7	0.198506	9.62471e-05	0.00191009
NAA38	0.169354	9.64106e-05	0.00191201
STX16	-0.240696	9.64574e-05	0.00191201
CPED1	0.286876	9.69845e-05	0.00192133
TRBV11-2	0.358586	9.72928e-05	0.00192469
C3orf35	-0.179619	9.73464e-05	0.00192469
CCDC141	-0.288224	9.73752e-05	0.00192469
PLOD3	0.139244	9.73827e-05	0.00192469
IRAK2	0.304631	9.76761e-05	0.00192936
BTAF1	-0.266677	9.78798e-05	0.00193225
LOC101929125	-0.143982	9.80665e-05	0.0019348
ZNF577	-0.150316	9.81279e-05	0.00193488
PTGDR	-0.495192	9.84883e-05	0.00194085
RNU6-742P	-0.412626	9.87002e-05	0.00194389
CCNG2	-0.207284	9.91228e-05	0.00195108
ECRP	0.417636	9.9181e-05	0.00195108
SSH2	-0.241612	9.92413e-05	0.00195113
RNU6-1020P	-0.509535	9.94716e-05	0.0019543
SERPINA1	0.289693	9.95438e-05	0.0019543
LOC202025	-0.499957	9.95765e-05	0.0019543
SNORD61	-0.533856	0.00010001	0.00196167
SHKBP1	0.215258	0.000100139	0.00196305
RNU6-986P	-0.275343	0.000100253	0.00196414
EPSTI1	1.24108	0.000100444	0.00196629
C14orf183	-0.225384	0.000100479	0.00196629
RNU6-310P	-0.576181	0.000100556	0.00196653
DCXR	0.237501	0.000100608	0.00196653
KIAA1919	-0.233797	0.000100752	0.0019682
RP11-96C23.9	-0.288078	0.000101281	0.00197739
ZNF213-AS1	-0.166914	0.000101518	0.00198087
NUDT13	-0.152771	0.000101765	0.00198454
PLCB2	-0.251084	0.000102053	0.00198592
VDAC2	0.229116	0.000102057	0.00198592
SQLE	0.160874	0.000102068	0.00198592
MCMBP	0.210958	0.000102072	0.00198592
CD4	0.354237	0.000102349	0.00198976
EMC10	0.224454	0.000102387	0.00198976
ATXN1	-0.198581	0.000102532	0.00199143
SRSF11	-0.287137	0.000102708	0.0019937
PARP10	0.227316	0.00010277	0.00199374
FAM188A	-0.280396	0.000103017	0.00199738
NEDD1	0.269344	0.000103334	0.00200132
RAB8A	0.150246	0.000103338	0.00200132
HNRNPH2	0.257405	0.000103692	0.00200701
TRBV7-8	0.273651	0.000103764	0.00200725
DLGAP4	0.129456	0.000104036	0.00201136
RNU6-1080P	-0.24127	0.000104806	0.0020232
RNU6-27P	-0.553933	0.000104823	0.0020232
PRICKLE3	0.172825	0.000104828	0.0020232
FARSA	0.182277	0.000104944	0.00202427
PRPF19	0.284331	0.00010506	0.0020244
FAM46A	0.207074	0.000105071	0.0020244
MRPL34	0.244202	0.000105295	0.00202691
HADHA	0.250268	0.000105321	0.00202691
RNU6-142P	-0.241359	0.000105399	0.00202724
FCGR1C	1.98373	0.000105715	0.00203217
AP3D1	0.155774	0.000105816	0.00203295
RNU6-23P	-0.518342	0.000106265	0.00204041
RP3-473B4.3	-0.181782	0.000106448	0.00204235
FAM153B	-0.174025	0.000106487	0.00204235
LCP1	0.242638	0.000106694	0.00204515
SPICE1	-0.188132	0.000107132	0.00205192
GOLGA8R	-0.303218	0.000107169	0.00205192
HLA-J	0.1318	0.00010756	0.00205823
C4orf3	0.185449	0.000107902	0.0020635
MIF	0.160955	0.000107958	0.0020635
RNU6-211P	-0.401177	0.000108232	0.00206708
SIN3B	-0.18523	0.000108268	0.00206708
CTC-384G19.1	-0.167718	0.000108571	0.0020717
TMBIM6	0.14437	0.000108765	0.00207422
STAT2	0.948219	0.000108865	0.00207496
RNU6-541P	-0.316893	0.000109022	0.00207677
ATP5H	0.190103	0.000109484	0.0020844
NDUFB10	0.178353	0.00010995	0.00209209
ZNF169	-0.136864	0.000110378	0.00209827
AL845154.2	-0.192165	0.000110399	0.00209827
ADRM1	0.20877	0.000110763	0.00210358
LOC101927209	-0.143025	0.000110854	0.00210358
ARHGEF3	0.202653	0.000110866	0.00210358
MIR4531	-0.204972	0.000110991	0.00210476
BATF	0.163207	0.000111427	0.00211185
RP4-620F22.2	1.56565	0.000111685	0.00211556
MIR3916	-0.374426	0.000111908	0.00211857
LHFPL2	0.335329	0.000111989	0.00211893
PEPD	0.229433	0.000112081	0.00211916
HIST1H3E	0.207123	0.000112127	0.00211916
ZFPL1	0.134725	0.000112525	0.00212548
PRDX4	0.155651	0.000112609	0.0021258
FUNDC2	0.157643	0.000112668	0.0021258
SUZ12P1	-0.224204	0.000112802	0.00212586
NPIPB1P	-0.273629	0.000112857	0.00212586
SNORD105	-0.469745	0.000112948	0.00212586
ITGB3BP	-0.171973	0.000112985	0.00212586
SNX15	0.140463	0.000113022	0.00212586
LOC339539	-0.271044	0.00011305	0.00212586
MT1IP	0.247459	0.000113359	0.00212947
AAK1	-0.275329	0.000113373	0.00212947
RNU6-1004P	-0.299481	0.000113431	0.00212947
CELF2-AS1	-0.464332	0.000113514	0.00212983
TMEM185B	0.304823	0.000113637	0.00213097
ZNF600	-0.310146	0.000113932	0.00213532
ZNF808	-0.173102	0.000114427	0.0021434
CHMP2B	0.274692	0.000114532	0.00214416
XPNPEP1	0.171973	0.000115261	0.00215661
LOC102606465	-0.179976	0.000115424	0.00215847
KCTD7	-0.192141	0.000115681	0.00216207
RNU6-787P	-0.360419	0.000116082	0.00216836
LRRC25	0.242815	0.000116166	0.00216873
PLA2G15	0.155652	0.000116289	0.00216982
RNU6-652P	-0.407556	0.000116546	0.00217297
ERMARD	-0.183917	0.000116618	0.00217297
RNU6-335P	-0.242331	0.000116694	0.00217297
GHITM	0.189763	0.000116736	0.00217297
CD86	0.404469	0.00011678	0.00217297
LINC00115	-0.342527	0.000116954	0.00217304
PSMA3	0.284224	0.000116965	0.00217304
COPB1	0.225857	0.000116977	0.00217304
RNU6-878P	-0.465685	0.00011714	0.00217487
TOMM40	0.202305	0.000117261	0.00217591
RABGGTB	-0.244645	0.000117928	0.00218606
ORM2	-0.191961	0.000117937	0.00218606
ZNFX1	0.349868	0.000118164	0.00218839
RNU6-46P	-0.308257	0.000118207	0.00218839
DDX49	0.148318	0.000118258	0.00218839
ATF7	0.187663	0.000118343	0.00218877
LRMP	-0.192029	0.000118443	0.00218941
ZBTB20-AS4	-0.284316	0.000118729	0.0021935
TMEM109	0.336665	0.00011881	0.00219379
DNAJC1	0.252138	0.000119006	0.0021962
LENG8-AS1	-0.222704	0.0001191	0.0021962
RNU6-638P	-0.537655	0.00011917	0.0021962
RNU4-82P	-0.379506	0.000119363	0.0021962
SNORD104	-0.470767	0.000119372	0.0021962
FNIP1	-0.205267	0.000119397	0.0021962
SOS1	0.273318	0.000119542	0.0021962
RP11-536P6.3	-0.187149	0.00011958	0.0021962
FRMD4B	0.248166	0.0001196	0.0021962
TRAPPC12	-0.127353	0.000119631	0.0021962
NDUFA12	0.2026	0.000119657	0.0021962
RNU6-70P	-0.262461	0.000119935	0.0022001
NPIPB15	-0.223061	0.000120137	0.00220259
CST3	0.31519	0.000120333	0.00220499
SHMT2	0.242887	0.000120764	0.00221169
ZNF594	-0.222431	0.000120934	0.0022136
ARNTL2	0.183642	0.000121298	0.00221905
RNA5SP460	-0.372499	0.000121445	0.00222055
PPIB	0.201676	0.000121528	0.00222085
SCARF1	0.491328	0.000121613	0.0022212
LOC100506282	-0.280504	0.000121843	0.0022242
HIBCH	-0.229197	0.000121983	0.00222554
RP11-775B15.2	-0.254338	0.000122361	0.00223043
MIR4454	-0.254124	0.000122454	0.00223043
SIGMAR1	0.265282	0.000122457	0.00223043
PDXDC2P	-0.212508	0.00012258	0.00223043
CUL4A	-0.246793	0.000122624	0.00223043
MAN2B1	0.194551	0.000122648	0.00223043
GYS1	0.194964	0.000122957	0.00223485
AC006372.4	-0.255775	0.000123359	0.00224094
MIR3192	-0.300478	0.000123721	0.0022463
RPPH1	-0.19712	0.000123905	0.00224845
RNU6-1273P	-0.252051	0.000124014	0.00224921
RNU6-1115P	-0.279641	0.000124278	0.0022527
SAPCD1	-0.140438	0.00012434	0.0022527
RP11-292F22.5	-0.518001	0.000124469	0.00225382
AGTPBP1	-0.21156	0.000124562	0.0022543
EFNA4	0.202321	0.000124792	0.00225724
SQRDL	0.535912	0.000124916	0.00225828
ATP5G1	0.14668	0.000125067	0.00225873
LOC101930595	-0.249676	0.000125075	0.00225873
AC053503.6	-0.157252	0.000125268	0.002261
LRRC37B	-0.238236	0.000125423	0.00226154
LMNB1	0.535793	0.000125433	0.00226154
RP3-323P13.2	-0.247045	0.000126316	0.00227626
FKBP15	0.262298	0.000126828	0.00228328
MICU1	0.333777	0.000126842	0.00228328
C1QC	0.176346	0.000127335	0.00229094
NSFL1C	-0.185295	0.000127419	0.00229123
METTL17	-0.193349	0.000127704	0.00229346
IGBP1	0.235319	0.000127733	0.00229346
MPV17L2	0.149056	0.000127747	0.00229346
RP5-866L20.1	-0.214043	0.000127972	0.00229568
MIA-RAB4B	0.175701	0.000128007	0.00229568
DCPS	0.238905	0.000128092	0.00229579
POU6F2-AS2	-0.167125	0.000128149	0.00229579
RNU6-1322P	-0.355528	0.000128449	0.00229994
SNORD14E	-0.388219	0.000128555	0.00230061
FLT3LG	0.370299	0.000128923	0.00230596
KCNQ1OT1	-0.230687	0.000129063	0.00230603
AC106053.1	-0.215539	0.000129063	0.00230603
SPTLC2	0.248866	0.000129405	0.0023109
RNA5SP386	-0.183439	0.000129649	0.00231404
GIMAP7	0.343691	0.000129754	0.00231469
MIR3690	-0.639934	0.000130128	0.00232013
RNU4-2	-0.753898	0.000130344	0.00232064
LOC101927087	-0.126919	0.000130363	0.00232064
VPS13A	-0.278181	0.000130454	0.00232064
UNC93B1	0.216462	0.000130481	0.00232064
RNU6-715P	-0.229362	0.000130501	0.00232064
ARG1	-0.357105	0.000130845	0.00232554
CAP1	0.128049	0.00013105	0.00232796
ZDHHC17	-0.208709	0.000131554	0.00233474
DGKG	-0.17843	0.000131592	0.00233474
SNORA22	-0.358259	0.00013164	0.00233474
FAM96B	0.185146	0.000132319	0.00234554
RNU6-45P	-0.470554	0.000132526	0.00234798
TMEM229B	0.184696	0.00013276	0.00235089
KLF3-AS1	-0.15202	0.000133011	0.00235321
RRN3P3	-0.224195	0.000133031	0.00235321
RP1-39G22.5	-0.24684	0.000133513	0.00236006
H2AFX	0.205258	0.000133558	0.00236006
MIR17	-0.207042	0.000134039	0.00236725
RNU6-957P	-0.6177	0.000134184	0.00236725
LOC100506544	0.24911	0.000134196	0.00236725
RNU6-485P	-0.372163	0.000134246	0.00236725
ACOT7	0.183768	0.000134385	0.00236846
LINC00648	-0.149854	0.000134861	0.00237561
RNU6-1327P	-0.311937	0.000135367	0.00238327
RAF1	-0.210729	0.000135889	0.00238726
RPS6KA2-AS1	-0.183479	0.000135914	0.00238726
EMR2	-0.285994	0.000135965	0.00238726
NME1-NME2	0.237567	0.000135974	0.00238726
RP11-533N14.3	-0.187453	0.000135978	0.00238726
MIR548O2	-0.671969	0.000136018	0.00238726
ZNF789	-0.173484	0.000136152	0.00238836
EMC7	0.199221	0.000136734	0.00239732
SH3BP1	0.187079	0.000136975	0.00240031
NBPF7	-0.196117	0.000137091	0.00240108
ZNF302	-0.183586	0.000137387	0.00240468
DNAJC3-AS1	-0.288554	0.000137439	0.00240468
RNU6-536P	-0.469893	0.000137942	0.00241192
PPP2R1A	0.27381	0.000137996	0.00241192
RNU6-235P	-0.365176	0.000138191	0.00241409
HIST1H4C	0.333286	0.000138417	0.00241585
TCEB3	0.20175	0.000138436	0.00241585
RELB	0.139914	0.000138765	0.00242034
TRIM22	0.647207	0.000139062	0.00242427
DCUN1D2	-0.197528	0.000139449	0.00242571
VAMP3	0.498004	0.000139497	0.00242571
RP11-22A3.1	-0.206778	0.000139521	0.00242571
SNORD58C	-0.903223	0.000139522	0.00242571
PVRL2	0.181366	0.000139554	0.00242571
HIVEP2	0.321856	0.000139576	0.00242571
TYMP	0.329069	0.00013971	0.00242678
MS4A4E	-0.382422	0.000140394	0.00243739
PA2G4	0.210728	0.000140549	0.00243847
SNORD116-27	-0.536369	0.0001406	0.00243847
MICALL1	0.162776	0.000140767	0.00244001
AIF1	0.273759	0.000140888	0.00244001
OSCAR	0.184509	0.000140917	0.00244001
ERO1LB	-0.184404	0.000140978	0.00244001
MME	-0.463676	0.000141405	0.00244613
LOC101929207	-0.251629	0.000141652	0.00244915
CSGALNACT2	-0.185091	0.000141757	0.00244971
RP11-367B6.2	-0.344841	0.00014183	0.00244972
DHX8	0.174359	0.000142089	0.00245231
KIAA1598	0.515903	0.000142126	0.00245231
MSS51	-0.193722	0.000142244	0.00245309
RP11-206L10.9	-0.216166	0.000142768	0.00245935
FAM153C	-0.166623	0.000142816	0.00245935
NDUFA1	0.185731	0.000142826	0.00245935
RP11-745L13.2	-0.271241	0.000143333	0.00246683
RP11-80H8.4	-0.297183	0.000143614	0.00247039
MIR708	-0.239554	0.000143956	0.00247502
RGL1	0.1718	0.000144347	0.00248048
RNU6-227P	-0.453046	0.000145144	0.00249289
LOC101929302	-0.323614	0.000145626	0.00249894
LOC100133091	-0.183908	0.000145651	0.00249894
CMTR1	0.370875	0.000145718	0.00249894
NKIRAS2	0.146989	0.000145928	0.00250126
MYO15B	-0.179711	0.000146427	0.00250855
RNU6-216P	-0.357739	0.000146735	0.00251254
ATG4A	0.171898	0.000147221	0.00251957
RNU4ATAC11P	-0.414963	0.000147414	0.00252161
SNX12	0.131772	0.000147763	0.00252629
LOC285181	-0.213637	0.000147965	0.00252725
RNA5SP217	-0.538055	0.000147969	0.00252725
SMPD1	0.212704	0.000148269	0.00252999
IFIT5	0.763792	0.000148363	0.00252999
ANKRD18A	-0.195565	0.000148373	0.00252999
RNU6-540P	-0.26349	0.00014843	0.00252999
SDE2	0.254262	0.000148807	0.00253448
KIAA0226L	-0.385333	0.000148858	0.00253448
SLC35E3	-0.191077	0.000148919	0.00253448
C12orf4	0.444314	0.000149081	0.00253595
CCR3	-0.517633	0.000149185	0.00253645
RNU6-148P	-0.230768	0.000149304	0.00253718
DERL1	0.214342	0.000150022	0.0025481
FNDC9	-0.222617	0.00015021	0.00254877
KLRC4-KLRK1	-0.591336	0.000150213	0.00254877
RNU6-419P	-0.603533	0.000150362	0.00255003
MYO19	-0.157901	0.000150639	0.00255344
RNU6-266P	-0.517748	0.00015095	0.00255743
ADO	0.151001	0.000151225	0.00256072
MTMR10	-0.211332	0.000151296	0.00256072
LOC101927257	-0.197797	0.000151432	0.00256173
CR1	-0.242152	0.000151855	0.00256758
BRWD1-IT1	-0.16452	0.000152164	0.00257152
TXN2	0.143744	0.000152374	0.00257379
CCT7	0.208002	0.000152477	0.00257424
SLC6A12	0.348755	0.000152562	0.00257437
BASP1	-0.152639	0.000152799	0.00257625
TUBB4A	0.167157	0.000152954	0.00257625
[truncated: 31,699 more rows]
