# Supplementary material for: Comparative transcriptomic analysis reveals translationally relevant processes in mouse models of malaria
Source: eLife. 2022 Jan 10;11:e70763. doi: 10.7554/eLife.70763 (PMC8747512; doi:10.7554/eLife.70763)
Supplement: Supplementary file 6. [file elife-70763-supp6.xlsx]

## Sheet: Key
Supplementary File 6 Idaghdour et al 2012 Differential Expression Analysis
Table Column Names Key
Description: The results of the differential expression Analysis of the Idaghdour et al., 2012 microarray dataset
Symbol	Gene Symbols
P.value	p-value
adj.P.Val	false discovery rate corrected p-value
logFC	log fold change
AveExpr	average expression
t	t-statistic
B	B-statistic
Entrez_Gene_ID	entrez gene id
Probe_Id	probe id
Tab Names Key
Healthy	Healthy
UM	Uncomplicated Malaria

## Sheet: UM-HC
Symbol	logFC	AveExpr	t	P.Value	adj.P.Val	B	Entrez_Gene_ID	Probe_Id
C1QB	2.94661	9.28397	12.6314	3.67714e-25	1.1522e-20	45.7114	713	ILMN_1796409
LAG3	2.76065	10.0574	11.7293	8.7848e-23	1.37631e-18	40.5215	3902	ILMN_1813338
FCER1A	-1.96571	8.69533	-10.079	1.88785e-18	1.9718e-14	31.033	2205	ILMN_1688423
BCL6	0.837564	10.4227	9.92485	4.74858e-18	3.7198e-14	30.1539	604	ILMN_1737314
BCL11A	-0.519004	8.81903	-9.77383	1.16967e-17	7.33008e-14	29.2945	53335	ILMN_1659800
PDCD1	1.10675	7.42518	9.35357	1.41653e-16	7.39761e-13	26.9159	5133	ILMN_1806725
PID1	-0.732766	7.54763	-9.06023	7.95877e-16	3.56257e-12	25.2691	55022	ILMN_1671891
FGR	0.540116	12.193	8.68693	7.01096e-15	2.74602e-11	23.1927	2268	ILMN_1795158
MMP9	2.12352	11.1921	8.57009	1.3778e-14	4.79688e-11	22.5479	4318	ILMN_1796316
ID3	-0.925891	9.02166	-8.40085	3.64767e-14	1.10334e-10	21.6186	3399	ILMN_1732296
AP1S2	-0.804172	11.0844	-8.38193	4.06548e-14	1.10334e-10	21.5151	8905	ILMN_1766411
STS-1	0.737543	9.14715	8.37519	4.22546e-14	1.10334e-10	21.4783	84959	ILMN_1653856
SCD	1.11954	8.11986	8.17466	1.32687e-13	3.02629e-10	20.3861	6319	ILMN_1689329
RSL1D1	-0.597946	10.1621	-8.17134	1.35214e-13	3.02629e-10	20.3681	26156	ILMN_1723729
C1QC	1.63207	8.09921	8.09569	2.07691e-13	4.33853e-10	19.9585	714	ILMN_1785902
LY86	-1.00403	9.68945	-8.04894	2.70579e-13	5.29895e-10	19.7061	9450	ILMN_1807825
C16orf57	0.734655	9.92362	8.03175	2.98163e-13	5.49568e-10	19.6135	79650	ILMN_1765880
HVCN1	-0.787183	8.9212	-8.01862	3.21122e-13	5.59002e-10	19.5427	84329	ILMN_1815168
MIAT	1.0231	8.22007	7.97889	4.01761e-13	6.62567e-10	19.3289	440823	ILMN_1864900
C1QA	1.12645	7.88545	7.79302	1.13981e-12	1.78573e-09	18.3339	712	ILMN_1737918
CACNA2D3	-0.586896	6.91239	-7.77157	1.28482e-12	1.91707e-09	18.2196	55799	ILMN_1754076
ACADVL	0.479215	10.1855	7.5911	3.50069e-12	4.98594e-09	17.2633	37	ILMN_1806408
MXD3	0.597468	7.92496	7.57907	3.74149e-12	5.09721e-09	17.1999	83463	ILMN_1711904
C16orf7	0.85928	8.79726	7.53974	4.64844e-12	6.06893e-09	16.9929	9605	ILMN_1693630
IFNG	1.1108	7.55155	7.52435	5.05984e-12	6.3418e-09	16.912	3458	ILMN_2207291
SBNO2	0.871664	9.5096	7.49562	5.92676e-12	7.14266e-09	16.7611	22904	ILMN_1808811
ACOT7	0.555352	7.79977	7.46255	7.10773e-12	8.24865e-09	16.5878	11332	ILMN_1719178
ELMO2	0.555933	8.74071	7.44597	7.78489e-12	8.66465e-09	16.5011	63916	ILMN_1778168
LOC653079	-0.869418	11.2507	-7.44056	8.01924e-12	8.66465e-09	16.4728	653079	ILMN_3215954
C21orf7	-1.39403	10.4454	-7.40594	9.69402e-12	1.01251e-08	16.2919	56911	ILMN_1699071
PLEKHA1	-0.598531	8.32075	-7.36735	1.19707e-11	1.20996e-08	16.0907	59338	ILMN_1662839
FCGBP	-0.706546	7.49796	-7.34793	1.33086e-11	1.30316e-08	15.9897	8857	ILMN_1700156
FAM179A	1.0994	8.10069	7.33269	1.44621e-11	1.37319e-08	15.9105	165186	ILMN_3247182
CLC	-2.39149	10.4221	-7.30552	1.67675e-11	1.54528e-08	15.7694	1178	ILMN_1654875
PHTF1	0.591836	8.28704	7.29149	1.80977e-11	1.62021e-08	15.6966	10745	ILMN_1803464
GYG1	0.871543	10.7822	7.24693	2.30505e-11	2.00629e-08	15.466	2992	ILMN_2230862
UBE2C	0.897744	8.08879	7.18677	3.19217e-11	2.65836e-08	15.1556	11065	ILMN_1714730
HIST1H2BK	0.591999	11.9808	7.18494	3.2239e-11	2.65836e-08	15.1462	85236	ILMN_1796179
MIR1974	-1.60786	9.16327	-7.15884	3.71155e-11	2.98199e-08	15.012	100302207	ILMN_3308961
TREM1	-0.826605	7.93061	-7.14486	4.0022e-11	3.13512e-08	14.9401	54210	ILMN_1688231
C19orf59	1.40032	10.7993	7.13978	4.11325e-11	3.14353e-08	14.914	199675	ILMN_1762713
LOC729742	-0.66105	12.0005	-7.11574	4.68135e-11	3.48358e-08	14.7907	729742	ILMN_3225211
MTHFD2	0.68186	8.63928	7.10851	4.86706e-11	3.48358e-08	14.7536	10797	ILMN_1674706
CCNY	-0.61067	8.73274	-7.10756	4.89174e-11	3.48358e-08	14.7488	219771	ILMN_1708991
LOC650850	3.80494	10.1108	7.08044	5.65904e-11	3.94045e-08	14.61	650850	ILMN_1804217
KLHL22	-0.627311	9.15361	-7.05943	6.33391e-11	4.31449e-08	14.5026	84861	ILMN_1705390
RPL21	-0.855533	12.4526	-7.03339	7.28167e-11	4.85455e-08	14.3697	6144	ILMN_2290808
SGK1	-0.899771	9.38635	-7.02272	7.70925e-11	5.03253e-08	14.3154	6446	ILMN_3229324
BTG3	0.43363	8.05563	7.00703	8.38362e-11	5.36107e-08	14.2355	10950	ILMN_1707339
DRAM1	0.607583	8.74168	6.99866	8.76673e-11	5.49393e-08	14.1929	55332	ILMN_1669376
KIF5B	0.52328	8.01681	6.97901	9.73537e-11	5.92166e-08	14.093	3799	ILMN_1788160
SPPL2A	0.520897	9.74077	6.97569	9.90953e-11	5.92166e-08	14.0762	84888	ILMN_1734229
HIST1H2BD	1.02808	9.30657	6.97348	1.00264e-10	5.92166e-08	14.065	3017	ILMN_1651496
RNF144	-0.645839	8.38352	-6.96984	1.0223e-10	5.92166e-08	14.0465	9781	ILMN_1777660
KIAA1949	0.402127	12.251	6.96409	1.05409e-10	5.92166e-08	14.0173	170954	ILMN_1732967
LOC389156	-0.997749	10.4424	-6.96334	1.05832e-10	5.92166e-08	14.0135	389156	ILMN_3210171
RAB7L1	0.498451	9.45558	6.95355	1.11492e-10	6.12895e-08	13.9639	8934	ILMN_1813685
BEND5	-0.548083	7.86974	-6.91914	1.33872e-10	7.1259e-08	13.7896	79656	ILMN_3237448
APEX2	0.506621	8.9391	6.91872	1.34176e-10	7.1259e-08	13.7874	27301	ILMN_1652505
MIR1978	-1.15596	12.4374	-6.91282	1.38445e-10	7.23007e-08	13.7576	100302173	ILMN_3310491
CHMP7	-0.475141	8.01882	-6.88266	1.62451e-10	8.34468e-08	13.6053	91782	ILMN_1795933
TBK1	0.560262	9.24423	6.8753	1.68909e-10	8.53647e-08	13.5682	29110	ILMN_1739967
PPPDE2	0.612896	9.98239	6.86986	1.73843e-10	8.64636e-08	13.5408	27351	ILMN_1737580
EBI3	1.0345	7.87674	6.8563	1.8677e-10	9.13841e-08	13.4724	10148	ILMN_1802653
ICAM2	-0.5808	10.8628	-6.85348	1.89569e-10	9.13841e-08	13.4583	3384	ILMN_1786823
FAM102A	-0.579802	8.23695	-6.82687	2.18175e-10	1.0358e-07	13.3244	399665	ILMN_1745112
ZBTB32	0.530021	7.77159	6.81294	2.34809e-10	1.09814e-07	13.2545	27033	ILMN_1732981
OBFC2A	0.610616	9.65686	6.7999	2.51508e-10	1.15363e-07	13.1891	64859	ILMN_1785852
IRAK3	0.677003	9.05894	6.798	2.5404e-10	1.15363e-07	13.1795	11213	ILMN_1661695
RAC2	0.4049	13.7217	6.77961	2.79849e-10	1.25268e-07	13.0874	5880	ILMN_1709795
TOP3A	-0.500787	7.9843	-6.76092	3.08728e-10	1.36249e-07	12.9939	7156	ILMN_1700487
CCNE1	0.381598	7.4337	6.74985	3.27202e-10	1.42397e-07	12.9386	898	ILMN_1733419
NUSAP1	0.717662	7.93412	6.70731	4.08906e-10	1.75516e-07	12.7264	51203	ILMN_1726720
LOC727865	-0.682523	10.8695	-6.67788	4.76885e-10	2.01929e-07	12.58	727865	ILMN_3199737
GPR55	0.579864	7.41294	6.67114	4.93965e-10	2.06372e-07	12.5465	9290	ILMN_1723274
ZNF395	-0.638424	9.02518	-6.65085	5.49085e-10	2.26294e-07	12.4458	55893	ILMN_1772876
KIF20A	0.57839	7.3789	6.64842	5.56093e-10	2.26294e-07	12.4337	10112	ILMN_1695658
CTSL1	1.04437	9.40846	6.64361	5.702e-10	2.2906e-07	12.4099	1514	ILMN_1694757
BCL3	0.893558	9.77597	6.6358	5.93834e-10	2.35534e-07	12.3712	602	ILMN_1710514
DBN1	0.50505	7.27429	6.61932	6.46985e-10	2.53408e-07	12.2897	1627	ILMN_1757270
CENPA	0.518912	7.13267	6.60354	7.02247e-10	2.69863e-07	12.2117	1058	ILMN_1801257
DAZAP1	0.315777	8.32817	6.60027	7.14294e-10	2.69863e-07	12.1955	26528	ILMN_1746257
B4GALT5	0.832352	11.0855	6.60012	7.14834e-10	2.69863e-07	12.1948	9334	ILMN_1685824
FCRLB	0.484253	7.82728	6.58744	7.6346e-10	2.84789e-07	12.1321	127943	ILMN_1782015
LOC100132795	-0.536593	12.191	-6.57346	8.20813e-10	2.96464e-07	12.0632	100132795	ILMN_3201986
NEK2	0.365497	7.12394	6.57254	8.24716e-10	2.96464e-07	12.0587	4751	ILMN_1653822
RTN1	-0.426434	7.31512	-6.57032	8.34269e-10	2.96464e-07	12.0478	6252	ILMN_1756928
LGALS2	-1.23622	8.38967	-6.56901	8.39955e-10	2.96464e-07	12.0413	3957	ILMN_1687306
LFNG	-0.625368	10.0068	-6.56641	8.51315e-10	2.96464e-07	12.0285	3955	ILMN_1663080
LRP8	0.267243	7.26042	6.56636	8.51528e-10	2.96464e-07	12.0283	7804	ILMN_1677765
TSPAN17	0.583609	9.26247	6.54727	9.3994e-10	3.23649e-07	11.9343	26262	ILMN_1777881
ASPM	0.596916	7.67857	6.54287	9.61576e-10	3.275e-07	11.9126	259266	ILMN_1815184
TOP2A	0.983569	8.07433	6.53693	9.91532e-10	3.34072e-07	11.8835	7153	ILMN_1686097
PSTPIP2	0.997892	9.52449	6.52057	1.07888e-09	3.59636e-07	11.8031	9050	ILMN_1713058
HAVCR2	0.642954	10.3723	6.51846	1.0907e-09	3.59748e-07	11.7928	84868	ILMN_1693826
RNASE6	-0.901291	9.29591	-6.50444	1.17246e-09	3.82686e-07	11.724	6039	ILMN_1780533
HMMR	0.629523	7.48566	6.47279	1.37982e-09	4.45725e-07	11.5691	3161	ILMN_1781942
C17orf45	-0.52514	11.3554	-6.47032	1.39747e-09	4.46818e-07	11.5571	125144	ILMN_1719224
S100A12	1.22413	10.8396	6.46006	1.4731e-09	4.65128e-07	11.5069	6283	ILMN_1748915
LRRN3	-0.893573	8.13863	-6.45857	1.48442e-09	4.65128e-07	11.4997	54674	ILMN_1773650
STAMBPL1	0.584437	8.72682	6.43302	1.69224e-09	5.24998e-07	11.3751	57559	ILMN_1682799
BCAT1	0.555914	7.50528	6.42412	1.77111e-09	5.44077e-07	11.3317	586	ILMN_1766169
C16orf75	0.611883	8.48521	6.42111	1.79864e-09	5.47171e-07	11.3171	116028	ILMN_1790537
TROAP	0.471785	7.40078	6.40789	1.9245e-09	5.75757e-07	11.2528	10024	ILMN_1700337
SGK	-0.936944	9.5729	-6.40739	1.92936e-09	5.75757e-07	11.2504	6446	ILMN_1702487
PRF1	0.908511	11.3511	6.3976	2.02838e-09	5.99597e-07	11.2028	5551	ILMN_1740633
FLJ22662	0.631492	11.7732	6.37629	2.26149e-09	6.56297e-07	11.0994	79887	ILMN_1707286
ITGA5	-0.584383	8.98333	-6.37624	2.26208e-09	6.56297e-07	11.0991	3678	ILMN_1792679
MEF2C	-0.605575	7.49954	-6.36643	2.37798e-09	6.83594e-07	11.0516	4208	ILMN_1742544
SH3GLB1	0.489217	10.8523	6.36256	2.42533e-09	6.90867e-07	11.0329	51100	ILMN_1766045
FXYD5	-0.415193	11.3393	-6.35777	2.48525e-09	7.01557e-07	11.0097	53827	ILMN_1704286
LOC646044	0.4646	9.03138	6.35153	2.56555e-09	7.17757e-07	10.9795	646044	ILMN_3209973
C17orf70	-0.534328	9.66959	-6.34874	2.60221e-09	7.21572e-07	10.966	80233	ILMN_1711823
TPST2	0.449457	10.6354	6.34194	2.6938e-09	7.40418e-07	10.9331	8459	ILMN_1695432
ANXA3	0.8551	9.13263	6.31355	3.11159e-09	8.47815e-07	10.7961	306	ILMN_1694548
YWHAH	0.484999	11.6221	6.31069	3.15715e-09	8.52812e-07	10.7822	7533	ILMN_1728512
CDCA5	0.948208	8.35255	6.30621	3.22959e-09	8.64924e-07	10.7607	113130	ILMN_1683450
C17orf58	0.212061	7.35646	6.29255	3.4612e-09	9.19095e-07	10.6949	284018	ILMN_1688997
PDGFRB	0.479518	7.24045	6.28688	3.56201e-09	9.37915e-07	10.6676	5159	ILMN_1815057
LIMK2	0.497746	7.745	6.28233	3.64492e-09	9.51749e-07	10.6457	3985	ILMN_1660624
CD302	-0.583055	8.12752	-6.27781	3.72918e-09	9.65702e-07	10.624	9936	ILMN_1716797
PAFAH2	-0.44933	8.05882	-6.27295	3.8221e-09	9.81652e-07	10.6006	5051	ILMN_1682919
AURKA	0.698446	7.56486	6.26803	3.91831e-09	9.9605e-07	10.577	6790	ILMN_1680955
ADCY3	0.781782	9.1964	6.26555	3.96781e-09	9.9605e-07	10.5651	109	ILMN_1676893
NLRP3	-0.42568	8.10157	-6.26526	3.97352e-09	9.9605e-07	10.5637	114548	ILMN_1696933
LOC100133875	1.50745	9.77106	6.26025	4.07545e-09	1.01349e-06	10.5396	100133875	ILMN_3237878
PRC1	0.801058	7.87339	6.25122	4.26553e-09	1.05241e-06	10.4963	9055	ILMN_1728934
DLGAP5	0.671296	7.46659	6.2489	4.31577e-09	1.05649e-06	10.4852	9787	ILMN_1749829
C7orf59	-0.562853	11.1911	-6.24481	4.40565e-09	1.07013e-06	10.4656	389541	ILMN_1779735
CCDC72	-0.397614	12.234	-6.24077	4.4963e-09	1.08375e-06	10.4463	51372	ILMN_1707783
LOC100129685	-0.99507	9.595	-6.20929	5.26874e-09	1.26023e-06	10.2957	100129685	ILMN_3182762
CENPE	0.396171	7.34172	6.20485	5.38776e-09	1.27894e-06	10.2744	1062	ILMN_1716279
REPIN1	-0.362246	8.80387	-6.19619	5.62724e-09	1.32574e-06	10.2331	29803	ILMN_1671725
VIPR1	-0.634459	8.29299	-6.19338	5.70738e-09	1.33459e-06	10.2197	7433	ILMN_2199389
HSBP1	-0.379066	10.136	-6.19127	5.76816e-09	1.33881e-06	10.2096	3281	ILMN_1667030
DYSF	0.6173	11.1396	6.1877	5.8725e-09	1.35139e-06	10.1926	8291	ILMN_1810420
VENTX	-0.477785	7.14088	-6.18648	5.9086e-09	1.35139e-06	10.1868	27287	ILMN_1782352
PAFAH1B1	-0.340696	10.1922	-6.1825	6.02779e-09	1.36866e-06	10.1678	5048	ILMN_1722276
SLC26A8	0.376039	7.37538	6.17645	6.21341e-09	1.40065e-06	10.139	116369	ILMN_1656849
MTF1	0.614472	9.11976	6.16823	6.4748e-09	1.44915e-06	10.0999	4520	ILMN_1763828
HTRA2	0.319343	8.34932	6.16296	6.64802e-09	1.47737e-06	10.0748	27429	ILMN_1747204
ARID5B	0.510405	9.57623	6.13934	7.48204e-09	1.651e-06	9.96259	84159	ILMN_1721626
GRAP	-0.329679	8.38235	-6.13279	7.73098e-09	1.694e-06	9.93151	10750	ILMN_1656472
RUNDC2C	-0.603146	8.07222	-6.12132	8.18672e-09	1.78141e-06	9.87713	440352	ILMN_1690064
CCR3	-1.08617	7.45414	-6.11907	8.27893e-09	1.78905e-06	9.8665	1232	ILMN_1656684
GLIPR1	-0.687362	9.99192	-6.11156	8.59519e-09	1.82889e-06	9.8309	11010	ILMN_1769245
TUBA1B	0.517698	12.8511	6.11022	8.65255e-09	1.82889e-06	9.82459	10376	ILMN_1800261
TOMM20	-0.458225	9.27519	-6.1093	8.69236e-09	1.82889e-06	9.82023	9804	ILMN_1679796
AIM2	0.916148	9.15138	6.10915	8.69885e-09	1.82889e-06	9.81952	9447	ILMN_1681301
HLA-DOA	-0.460463	8.7402	-6.10786	8.75514e-09	1.82889e-06	9.8134	3111	ILMN_1659075
TPX2	0.583393	7.60989	6.1026	8.98764e-09	1.86503e-06	9.78852	22974	ILMN_1796949
PFKP	0.580286	9.04098	6.09651	9.26426e-09	1.90978e-06	9.75974	5214	ILMN_1805737
PGS1	0.595045	10.1985	6.07431	1.0346e-08	2.09973e-06	9.65491	9489	ILMN_2075051
FCER1G	0.537296	12.6558	6.07375	1.03747e-08	2.09973e-06	9.65228	2207	ILMN_2123743
FANCI	0.392618	7.04579	6.07352	1.03867e-08	2.09973e-06	9.65118	55215	ILMN_1655642
RTCD1	0.369637	8.61524	6.07075	1.05308e-08	2.1152e-06	9.63811	8634	ILMN_1808305
UHRF1	0.70095	8.01186	6.06827	1.06612e-08	2.12775e-06	9.62643	29128	ILMN_1786065
DHRS3	-0.557915	8.15382	-6.06042	1.10851e-08	2.19836e-06	9.58941	9249	ILMN_1752478
SAP30L	0.40307	9.60381	6.05463	1.14082e-08	2.24821e-06	9.56215	79685	ILMN_1757781
HK3	0.711439	10.2476	6.05093	1.16193e-08	2.27549e-06	9.54475	3101	ILMN_1670302
LOC387825	-0.664355	9.15065	-6.04926	1.17159e-08	2.28016e-06	9.53689	387825	ILMN_3214087
CD300LB	-0.473542	7.14705	-6.04301	1.20847e-08	2.33422e-06	9.50747	124599	ILMN_1782741
ITGAD	0.749472	6.94919	6.04204	1.21426e-08	2.33422e-06	9.50294	3681	ILMN_1681945
EIF3D	-0.406735	11.041	-6.03169	1.27815e-08	2.44204e-06	9.45428	8664	ILMN_1739847
PDE9A	-0.255502	6.95691	-6.02723	1.30669e-08	2.48144e-06	9.43332	5152	ILMN_1683063
RACGAP1	0.360542	7.23047	6.02042	1.35142e-08	2.55092e-06	9.40138	29127	ILMN_1702140
FCGRT	-0.55162	10.6964	-5.99528	1.53013e-08	2.85587e-06	9.28354	2217	ILMN_1705302
KIR2DL4	1.09472	8.29478	5.99514	1.5312e-08	2.85587e-06	9.28288	3805	ILMN_1693207
CEBPB	0.38179	13.3467	5.97538	1.68777e-08	3.11325e-06	9.19051	1051	ILMN_1693014
DDIT4	1.11106	10.0016	5.97415	1.69804e-08	3.11325e-06	9.18476	54541	ILMN_1661599
PRAGMIN	-0.666414	9.87388	-5.97309	1.70692e-08	3.11325e-06	9.17981	157285	ILMN_3240222
CCNB2	0.945744	8.22541	5.9726	1.71108e-08	3.11325e-06	9.1775	9133	ILMN_1801939
CTSD	0.60396	10.1218	5.97168	1.71887e-08	3.11325e-06	9.17319	1509	ILMN_1674038
MLF2	0.362343	9.50959	5.96319	1.79217e-08	3.22407e-06	9.13358	8079	ILMN_1671885
DYRK2	-0.54284	8.32644	-5.96223	1.80064e-08	3.22407e-06	9.12911	8445	ILMN_1684184
LILRA6	0.719944	8.55348	5.9461	1.94925e-08	3.47032e-06	9.05389	79168	ILMN_1651404
MND1	0.266903	7.05854	5.94435	1.96601e-08	3.48039e-06	9.04577	84057	ILMN_1671906
IL18R1	1.04509	9.18852	5.94259	1.98314e-08	3.49099e-06	9.03754	8809	ILMN_1781700
ARPC5L	0.536724	9.92486	5.93987	2.00975e-08	3.51808e-06	9.02489	81873	ILMN_2043816
LOC646942	-0.469659	11.6898	-5.93498	2.05858e-08	3.58354e-06	9.00213	646942	ILMN_3200299
MELK	0.53477	7.5704	5.93125	2.09661e-08	3.62811e-06	8.98477	9833	ILMN_1731184
LOC649447	-0.459869	12.2073	-5.9302	2.10735e-08	3.62811e-06	8.97992	649447	ILMN_1811063
SMPDL3A	0.746203	8.18465	5.92542	2.15733e-08	3.69386e-06	8.95769	10924	ILMN_1796349
AKIRIN2	0.455789	10.5756	5.92053	2.20973e-08	3.75555e-06	8.93493	55122	ILMN_2148847
KIR3DL2	0.973256	8.10221	5.91982	2.21732e-08	3.75555e-06	8.93168	3812	ILMN_2190842
EPHA4	-0.398469	7.6873	-5.9182	2.23502e-08	3.76516e-06	8.92414	2043	ILMN_1672022
AXIN2	-0.607317	8.09821	-5.91205	2.30334e-08	3.8595e-06	8.89559	8313	ILMN_1724480
IL8RB	-0.57364	11.0523	-5.90244	2.41426e-08	4.02385e-06	8.85099	3579	ILMN_1680397
LOC730316	-0.461626	10.6172	-5.89636	2.48706e-08	4.12091e-06	8.82282	730316	ILMN_1662130
SPOP	-0.400223	9.47056	-5.89376	2.51889e-08	4.12091e-06	8.81076	8405	ILMN_1795404
CERKL	-0.306485	7.1131	-5.89347	2.52252e-08	4.12091e-06	8.8094	375298	ILMN_1740837
PGD	0.486315	11.7505	5.89326	2.5251e-08	4.12091e-06	8.80843	5226	ILMN_1794165
LOC645688	-0.524169	11.489	-5.88627	2.61273e-08	4.24183e-06	8.77608	645688	ILMN_1772888
LY9	-0.348635	7.81245	-5.88071	2.68467e-08	4.32566e-06	8.75033	4063	ILMN_1731928
LOC391578	-0.483212	8.30801	-5.87952	2.70028e-08	4.32566e-06	8.74483	391578	ILMN_3286067
UBA3	0.416971	8.72894	5.87911	2.70578e-08	4.32566e-06	8.7429	9039	ILMN_2324157
MUC1	0.450662	7.08981	5.87743	2.72795e-08	4.33896e-06	8.73517	4582	ILMN_1677314
NOV	-0.393279	7.13399	-5.87593	2.74801e-08	4.34879e-06	8.72822	4856	ILMN_1787186
HRK	-0.611434	7.49166	-5.87103	2.81445e-08	4.43155e-06	8.70557	8739	ILMN_2193706
CKAP5	0.367786	8.66639	5.86837	2.85127e-08	4.46708e-06	8.69325	9793	ILMN_1716336
CECR5	-0.392663	8.58572	-5.86613	2.88257e-08	4.49366e-06	8.6829	27440	ILMN_1654690
IL2RG	0.39813	8.06252	5.85215	3.08562e-08	4.7635e-06	8.61837	3561	ILMN_1794386
SYK	-0.423683	10.5985	-5.85212	3.08607e-08	4.7635e-06	8.61823	6850	ILMN_2059549
GBP2	0.558721	12.2537	5.84428	3.20615e-08	4.91335e-06	8.58205	2634	ILMN_1774077
SPNS3	-0.508347	7.42183	-5.84316	3.22364e-08	4.91335e-06	8.57689	201305	ILMN_1668984
KIR2DL3	1.25123	8.93302	5.84274	3.2302e-08	4.91335e-06	8.57497	3804	ILMN_1667232
ADM	0.620712	11.6049	5.8319	3.40491e-08	5.15408e-06	8.52504	133	ILMN_1708934
GCH1	0.819808	8.48475	5.82894	3.45417e-08	5.18637e-06	8.51143	2643	ILMN_1788802
KIF14	0.404563	7.38531	5.82863	3.45934e-08	5.18637e-06	8.51001	9928	ILMN_1808071
VNN1	0.999494	8.75569	5.82236	3.56638e-08	5.32138e-06	8.48113	8876	ILMN_1674574
ITFG1	0.333538	8.50184	5.82023	3.60344e-08	5.35119e-06	8.47133	81533	ILMN_1693310
TRK1	0.662129	8.55342	5.81855	3.63281e-08	5.36937e-06	8.46364	7206	ILMN_1776125
STOM	0.869152	11.1013	5.81177	3.75432e-08	5.5229e-06	8.43246	2040	ILMN_1696419
NCAPG	0.729776	7.55984	5.8068	3.84591e-08	5.63121e-06	8.40962	64151	ILMN_1751444
ATP5E	-0.54785	11.6519	-5.79694	4.03396e-08	5.87907e-06	8.36438	514	ILMN_3261197
CEP55	0.751369	7.5376	5.78662	4.24045e-08	6.14316e-06	8.31708	55165	ILMN_1747016
LOC648771	-0.420674	12.3164	-5.78594	4.25437e-08	6.14316e-06	8.31398	648771	ILMN_3281563
ACTN1	-0.582752	11.2327	-5.77551	4.47448e-08	6.43135e-06	8.26618	87	ILMN_2232177
FAM174A	-0.393224	7.80654	-5.77338	4.52061e-08	6.46799e-06	8.25647	345757	ILMN_1712577
CD19	0.346217	10.514	5.77145	4.56292e-08	6.47316e-06	8.24764	930	ILMN_1782704
KLRB1	-0.783363	10.8702	-5.77134	4.56554e-08	6.47316e-06	8.2471	3820	ILMN_2079655
OIP5	0.440797	7.46356	5.76795	4.64085e-08	6.55028e-06	8.2316	11339	ILMN_1759277
GBP1	1.35942	10.734	5.75712	4.88971e-08	6.84803e-06	8.18211	2633	ILMN_1701114
TK1	0.899291	8.16236	5.75687	4.89551e-08	6.84803e-06	8.18099	7083	ILMN_1806037
EZH2	0.329287	7.44548	5.74887	5.088e-08	7.07834e-06	8.14446	2146	ILMN_1652913
ACP2	0.558884	8.18976	5.74782	5.11371e-08	7.07834e-06	8.13968	53	ILMN_2104830
LOC644511	-0.577031	12.4034	-5.74725	5.12792e-08	7.07834e-06	8.13705	644511	ILMN_1789809
TUBB3	0.45781	7.01743	5.74103	5.28385e-08	7.26159e-06	8.10868	10381	ILMN_1791726
HIST2H2AA3	0.915668	11.106	5.73356	5.47709e-08	7.49429e-06	8.07466	8337	ILMN_1659047
DDX27	-0.517615	8.09831	-5.7304	5.56103e-08	7.57606e-06	8.06025	55661	ILMN_1676759
LOC731049	0.628878	9.39697	5.72284	5.76694e-08	7.82257e-06	8.02582	731049	ILMN_1808591
SERTAD2	-0.438249	10.5142	-5.71626	5.95204e-08	8.03884e-06	7.9959	9792	ILMN_1651347
GZMB	1.18584	11.7009	5.71316	6.04126e-08	8.12433e-06	7.98181	3002	ILMN_2109489
GPR137	0.449402	9.82868	5.70735	6.21209e-08	8.31836e-06	7.9554	56834	ILMN_1804332
FABP5L2	0.763231	8.51327	5.7035	6.3279e-08	8.43739e-06	7.93791	729163	ILMN_3178258
IL13RA1	-0.558528	9.76612	-5.70136	6.39328e-08	8.4516e-06	7.92818	3597	ILMN_1768505
MAP3K8	0.409548	8.925	5.70102	6.40358e-08	8.4516e-06	7.92665	1326	ILMN_1741159
PPP1R11	0.347996	11.2314	5.7001	6.43204e-08	8.4516e-06	7.92245	6992	ILMN_1747598
FCHSD2	-0.476688	8.33584	-5.69937	6.45432e-08	8.4516e-06	7.91918	9873	ILMN_1815734
SNHG6	-0.504797	10.9087	-5.69876	6.47343e-08	8.4516e-06	7.91638	641638	ILMN_3248443
RPL26	-0.538388	12.183	-5.69567	6.56981e-08	8.54185e-06	7.90239	6154	ILMN_1731546
DEPDC1B	0.207227	7.14714	5.69424	6.61496e-08	8.563e-06	7.8959	55789	ILMN_1814600
GBP4	1.14049	11.0239	5.69343	6.64074e-08	8.563e-06	7.89222	115361	ILMN_1771385
MS4A6A	-0.577272	10.8486	-5.68754	6.83093e-08	8.7604e-06	7.86548	64231	ILMN_1721035
LOC440055	-0.571499	12.7861	-5.68696	6.84974e-08	8.7604e-06	7.86288	440055	ILMN_1700316
CD79B	-0.430221	11.0515	-5.68535	6.90292e-08	8.79253e-06	7.85556	974	ILMN_1710017
LOC643949	-0.68984	10.4319	-5.68158	7.02864e-08	8.91641e-06	7.83847	643949	ILMN_1692956
RPL27	-0.308378	13.4295	-5.67902	7.11521e-08	8.97347e-06	7.82688	6155	ILMN_1656807
ACTN4	0.455796	9.80802	5.67856	7.13089e-08	8.97347e-06	7.82479	81	ILMN_1725534
LOC729816	0.756655	8.54026	5.6764	7.20492e-08	9.03035e-06	7.81502	729816	ILMN_3232696
STIL	0.422887	7.22271	5.65551	7.96111e-08	9.93838e-06	7.72053	6491	ILMN_2413650
CXCR6	0.912827	7.92577	5.65237	8.08091e-08	1.00479e-05	7.70639	10663	ILMN_1674640
HTATIP2	0.437967	9.71322	5.65011	8.16848e-08	1.01167e-05	7.69619	10553	ILMN_1664303
PANK2	0.338714	8.98176	5.64371	8.42174e-08	1.03385e-05	7.66729	80025	ILMN_1708095
LOC391126	-0.498144	11.6337	-5.64299	8.45061e-08	1.03385e-05	7.66405	391126	ILMN_3275447
SNX30	-0.323675	8.06917	-5.64273	8.46128e-08	1.03385e-05	7.66286	401548	ILMN_1738491
POMP	0.413229	10.1704	5.64168	8.50346e-08	1.03385e-05	7.65815	51371	ILMN_1693287
LOC100133390	-0.427354	8.38741	-5.64146	8.5126e-08	1.03385e-05	7.65713	100133390	ILMN_3286685
SLC41A3	-0.469421	8.12201	-5.6397	8.58424e-08	1.03693e-05	7.6492	54946	ILMN_1739885
CENPJ	0.264293	7.19231	5.63921	8.60413e-08	1.03693e-05	7.64701	55835	ILMN_1661776
MKI67	0.312778	6.90617	5.63691	8.69914e-08	1.04142e-05	7.63662	4288	ILMN_1734827
TSPAN18	-0.361464	7.33201	-5.6367	8.70786e-08	1.04142e-05	7.63567	90139	ILMN_1699980
MOBKL1B	0.573484	9.41268	5.63419	8.81236e-08	1.04991e-05	7.62438	55233	ILMN_3242011
RPL13L	-0.657164	9.20925	-5.63185	8.91105e-08	1.05765e-05	7.61384	283345	ILMN_1740181
NLRC4	0.441913	8.28559	5.623	9.29431e-08	1.09897e-05	7.57398	58484	ILMN_1796976
LOC100132535	0.247279	6.9414	5.61831	9.50395e-08	1.11954e-05	7.55287	100132535	ILMN_3203444
EIF3H	-0.45094	10.9419	-5.61728	9.55073e-08	1.12083e-05	7.54823	8667	ILMN_1683660
BRD9	-0.273177	9.04691	-5.6148	9.66385e-08	1.12803e-05	7.53709	65980	ILMN_1651405
SDPR	-0.776675	9.90386	-5.61436	9.68405e-08	1.12803e-05	7.53511	8436	ILMN_1715991
POM121C	-0.451298	10.5361	-5.61354	9.72204e-08	1.12826e-05	7.53141	100101267	ILMN_3235808
ZNF689	-0.408864	9.07369	-5.60637	1.0059e-07	1.16305e-05	7.49917	115509	ILMN_1759008
LOC727826	-0.581831	9.10566	-5.60388	1.01783e-07	1.17252e-05	7.48801	727826	ILMN_3274666
LOC728139	-0.574869	10.7915	-5.60171	1.02836e-07	1.18032e-05	7.47827	728139	ILMN_3212833
IL10RB	0.453864	11.017	5.59849	1.04422e-07	1.19414e-05	7.46379	3588	ILMN_1767360
PNN	0.534338	8.61054	5.59586	1.05731e-07	1.20472e-05	7.452	5411	ILMN_1721703
CAMK1D	-0.439118	8.03739	-5.59481	1.0626e-07	1.20636e-05	7.44728	57118	ILMN_1705477
HIST2H2AA4	0.815807	11.5748	5.58685	1.10344e-07	1.24821e-05	7.41159	723790	ILMN_3242900
LOC731314	0.612437	8.83043	5.58351	1.12104e-07	1.26355e-05	7.39663	731314	ILMN_1785756
LOC729500	-0.622475	9.69207	-5.57998	1.13994e-07	1.28025e-05	7.3808	729500	ILMN_3229570
VPREB3	-0.699657	9.60994	-5.5778	1.15177e-07	1.28892e-05	7.37103	29802	ILMN_1700147
HMGB2	0.503896	10.3168	5.57416	1.17176e-07	1.3052e-05	7.35476	3148	ILMN_1654268
LOC148413	-0.372786	9.3546	-5.57364	1.17465e-07	1.3052e-05	7.35243	148413	ILMN_3244323
LOC100132037	-0.57019	10.2537	-5.56885	1.20158e-07	1.32521e-05	7.33099	100132037	ILMN_3283664
KIFC1	0.613798	7.42953	5.56821	1.20523e-07	1.32521e-05	7.32812	3833	ILMN_2222008
UBE2E2	-0.412004	8.8831	-5.56819	1.20535e-07	1.32521e-05	7.32802	7325	ILMN_1707475
OLIG1	-1.06669	8.18076	-5.56329	1.23357e-07	1.35149e-05	7.30613	116448	ILMN_1666089
CHEK1	0.502178	7.19657	5.55731	1.26894e-07	1.3854e-05	7.27939	1111	ILMN_1664630
NDC80	0.369942	7.40094	5.55253	1.29789e-07	1.41208e-05	7.25806	10403	ILMN_1664511
LOC136143	-0.533925	9.51886	-5.54878	1.32107e-07	1.43233e-05	7.24131	136143	ILMN_1668228
PKMYT1	0.337541	7.18953	5.54805	1.32566e-07	1.43235e-05	7.23803	9088	ILMN_1766658
TGFBI	-0.926638	10.1952	-5.54248	1.36092e-07	1.4654e-05	7.2132	7045	ILMN_1663866
TCF4	-0.545151	8.02039	-5.53639	1.40055e-07	1.50291e-05	7.18606	6925	ILMN_1814194
LOC728744	0.914884	8.07935	5.53173	1.43166e-07	1.53105e-05	7.16528	728744	ILMN_1654389
C5orf13	-0.496637	8.07502	-5.52816	1.4559e-07	1.55167e-05	7.14941	9315	ILMN_1680738
XPNPEP1	0.317847	9.80544	5.5257	1.47288e-07	1.56e-05	7.13843	7511	ILMN_1669015
LOC642103	0.659814	9.37288	5.52558	1.47368e-07	1.56e-05	7.13793	642103	ILMN_1712999
GLA	0.393455	9.70256	5.5244	1.48189e-07	1.56342e-05	7.13267	2717	ILMN_1766637
LOC100131205	-0.590548	11.3402	-5.52146	1.50253e-07	1.57987e-05	7.11959	100131205	ILMN_3214532
C16orf74	-0.363487	7.35461	-5.51887	1.52096e-07	1.5939e-05	7.10806	404550	ILMN_1806149
SLA	0.428997	10.5988	5.51563	1.54429e-07	1.61296e-05	7.09367	6503	ILMN_1667371
HCFC1R1	0.361581	8.76433	5.51329	1.56143e-07	1.62544e-05	7.08323	54985	ILMN_1757877
GPR97	0.496555	8.21318	5.51187	1.57189e-07	1.63091e-05	7.07692	222487	ILMN_1731161
PTMS	0.778169	8.16694	5.50813	1.59976e-07	1.65435e-05	7.0603	5763	ILMN_1721046
DMWD	0.504437	7.96951	5.5014	1.65107e-07	1.69995e-05	7.03045	1762	ILMN_1714352
CLEC4C	-0.42237	7.35348	-5.50094	1.6547e-07	1.69995e-05	7.02837	170482	ILMN_1665457
KIF11	0.443451	7.27407	5.49995	1.66236e-07	1.70223e-05	7.02401	3832	ILMN_1794539
MGC40489	0.211044	7.459	5.49787	1.67867e-07	1.71334e-05	7.01478	146880	ILMN_1659110
IFITM3	0.869943	13.498	5.49222	1.72379e-07	1.75367e-05	6.9897	10410	ILMN_1805750
ZFP36L2	-0.572873	10.0207	-5.48977	1.74367e-07	1.76816e-05	6.97886	678	ILMN_2150258
NPDC1	0.427608	7.50308	5.47383	1.8789e-07	1.89914e-05	6.90825	56654	ILMN_2199313
BIRC5	0.559378	7.46927	5.47181	1.8967e-07	1.91097e-05	6.89934	332	ILMN_1803124
ANKRD22	1.32743	9.37057	5.46866	1.92484e-07	1.93311e-05	6.88542	118932	ILMN_1799848
RNF144A	-0.395692	7.96927	-5.4563	2.03939e-07	2.04161e-05	6.83078	9781	ILMN_3238326
TYMS	0.909092	9.02447	5.45143	2.08629e-07	2.07723e-05	6.80929	7298	ILMN_1806040
CRTAP	-0.359464	7.82489	-5.45123	2.08823e-07	2.07723e-05	6.80841	10491	ILMN_1665235
2009-09-01	-0.431208	12.7737	-5.44689	2.13094e-07	2.11301e-05	6.78928	10801	ILMN_1769118
NOL6	-0.260801	8.32862	-5.4462	2.13782e-07	2.11313e-05	6.78624	65083	ILMN_1665442
DONSON	0.320253	7.00534	5.44517	2.1481e-07	2.11662e-05	6.7817	29980	ILMN_1709953
SLAMF7	0.538283	8.31243	5.44313	2.16871e-07	2.13024e-05	6.77268	57823	ILMN_1710923
LILRA3	1.3439	10.8951	5.44157	2.18448e-07	2.13902e-05	6.76583	11026	ILMN_1661631
LOC88523	0.576783	9.08315	5.43586	2.24345e-07	2.18992e-05	6.74066	88523	ILMN_1737561
LOC643433	-0.443723	11.8879	-5.42718	2.33603e-07	2.2732e-05	6.70245	643433	ILMN_1661306
AKAP7	-0.333738	7.16723	-5.42557	2.35364e-07	2.28325e-05	6.69536	9465	ILMN_1703049
CDC25A	0.280157	7.01596	5.42344	2.37711e-07	2.2989e-05	6.68598	993	ILMN_1711005
SLC2A3	0.516706	12.714	5.41955	2.42044e-07	2.3336e-05	6.66891	6515	ILMN_1775708
APLP2	-0.380013	8.61908	-5.41838	2.43374e-07	2.33917e-05	6.66374	334	ILMN_1710482
KIAA1600	0.447535	9.10164	5.41772	2.44115e-07	2.33917e-05	6.66087	57700	ILMN_1752927
PMEPA1	-0.207694	7.29511	-5.41489	2.47352e-07	2.36297e-05	6.64842	56937	ILMN_1657823
VAMP5	0.931546	11.0208	5.40806	2.55334e-07	2.4315e-05	6.61841	10791	ILMN_1809467
LOC401676	-0.579382	8.36905	-5.40743	2.56078e-07	2.4315e-05	6.61567	401676	ILMN_3292008
LOC651816	0.693432	8.82572	5.40458	2.59496e-07	2.45651e-05	6.60314	651816	ILMN_1729115
AKR1C3	-0.693693	7.75323	-5.40225	2.62319e-07	2.47576e-05	6.59292	8644	ILMN_1713124
SKA2	0.245279	7.59908	5.40013	2.6491e-07	2.49098e-05	6.58364	348235	ILMN_1807807
ZCCHC14	-0.379191	7.55929	-5.39963	2.65522e-07	2.49098e-05	6.58145	23174	ILMN_1743456
DCUN1D5	0.342328	8.48438	5.39285	2.74012e-07	2.56296e-05	6.55172	84259	ILMN_1726839
FLJ33590	0.697602	7.66768	5.3916	2.75601e-07	2.57015e-05	6.54626	285093	ILMN_1717029
CEACAM1	1.09327	9.19914	5.39021	2.77392e-07	2.57355e-05	6.54014	634	ILMN_1664330
SCAP	-0.423299	10.1315	-5.39004	2.77609e-07	2.57355e-05	6.5394	22937	ILMN_1677534
LOC729495	0.43048	10.2285	5.38286	2.87002e-07	2.65278e-05	6.50797	729495	ILMN_3225358
LASP1	0.276768	12.6289	5.38157	2.8872e-07	2.66081e-05	6.50234	3927	ILMN_1665909
LOC729841	-0.289686	11.8946	-5.37586	2.96455e-07	2.72408e-05	6.47737	729841	ILMN_3297577
CLEC1B	0.879138	9.14085	5.37381	2.99284e-07	2.74203e-05	6.4684	51266	ILMN_1745103
SLC2A14	0.516657	7.6802	5.36696	3.08924e-07	2.82211e-05	6.43846	144195	ILMN_1668865
HJURP	0.514098	7.30784	5.36559	3.10881e-07	2.83173e-05	6.4325	55355	ILMN_1703906
YAF2	-0.171349	7.21857	-5.35764	3.22517e-07	2.9292e-05	6.3978	10138	ILMN_1669303
UPF3B	0.363163	7.79871	5.35293	3.2962e-07	2.98506e-05	6.37723	65109	ILMN_1798163
EIF3L	-0.414319	12.3443	-5.3476	3.37816e-07	3.05047e-05	6.35404	51386	ILMN_1762725
NFKBIB	0.304314	7.72478	5.34267	3.45599e-07	3.11178e-05	6.33253	4793	ILMN_1674152
LOC441131	-0.324133	10.2583	-5.34093	3.48377e-07	3.12781e-05	6.32497	441131	ILMN_3200414
NBN	0.51725	8.12067	5.33877	3.51863e-07	3.15008e-05	6.31557	4683	ILMN_1717016
LOC648710	0.37994	7.32156	5.3345	3.58864e-07	3.2036e-05	6.29697	648710	ILMN_1710698
CHAF1B	0.354074	7.02528	5.33351	3.60503e-07	3.20909e-05	6.29267	8208	ILMN_1674231
SF3B4	0.461653	10.7755	5.32639	3.7251e-07	3.30658e-05	6.26174	10262	ILMN_1722648
KLHL2	0.377627	8.0316	5.32419	3.76304e-07	3.33082e-05	6.25217	11275	ILMN_1701837
C9orf45	-0.41464	7.55938	-5.32236	3.79482e-07	3.34949e-05	6.24424	81571	ILMN_1719998
SLU7	0.506051	8.86445	5.32137	3.81215e-07	3.35534e-05	6.23993	10569	ILMN_1685369
PCSK5	-0.404812	7.79721	-5.31541	3.91814e-07	3.43896e-05	6.21405	5125	ILMN_1767934
UBR1	0.246845	6.94695	5.31279	3.96569e-07	3.45782e-05	6.20266	197131	ILMN_1795964
ARG1	1.10735	8.37965	5.31241	3.9725e-07	3.45782e-05	6.20104	383	ILMN_1812281
FCGR1A	1.06961	9.9495	5.3124	3.97273e-07	3.45782e-05	6.20099	2209	ILMN_2176063
GBP5	1.21185	10.9779	5.30966	4.02311e-07	3.49197e-05	6.18909	115362	ILMN_2114568
CDCA2	0.341075	6.93177	5.30122	4.182e-07	3.61274e-05	6.15253	157313	ILMN_1660654
LOC647285	-0.514556	11.1081	-5.30105	4.18531e-07	3.61274e-05	6.15179	647285	ILMN_3289100
KIAA1147	-0.319214	8.46591	-5.29604	4.28267e-07	3.68662e-05	6.13009	57189	ILMN_1857069
LOC100131866	-0.502066	9.20566	-5.29241	4.35465e-07	3.73832e-05	6.11436	100131866	ILMN_3208014
BUB1	0.598453	7.34024	5.29141	4.37462e-07	3.7452e-05	6.11004	699	ILMN_2202948
NMT2	-0.327061	7.6471	-5.29075	4.38775e-07	3.74621e-05	6.10721	9397	ILMN_1656378
SNRNP200	-0.248026	7.50405	-5.28723	4.45926e-07	3.79691e-05	6.09195	23020	ILMN_1705928
SGK3	-0.273609	7.24509	-5.28328	4.54059e-07	3.85569e-05	6.0749	23678	ILMN_1729785
LRRK2	0.412363	8.4738	5.28075	4.59356e-07	3.89012e-05	6.06395	120892	ILMN_1776649
PLCXD1	0.489243	8.28794	5.27928	4.62462e-07	3.90587e-05	6.0576	55344	ILMN_1747451
PIK4CA	-0.274623	8.93787	-5.27458	4.7252e-07	3.98009e-05	6.03729	5297	ILMN_1655177
MED10	-0.302208	9.52513	-5.272	4.78119e-07	4.01645e-05	6.02618	84246	ILMN_1707631
PSMD1	0.5819	8.96935	5.27079	4.80767e-07	4.0279e-05	6.02097	5707	ILMN_1702837
TXNDC12	-0.683898	9.92193	-5.26566	4.92181e-07	4.11253e-05	5.99883	51060	ILMN_1783753
PRKCB1	0.327672	10.7082	5.25981	5.05531e-07	4.21285e-05	5.97358	5579	ILMN_1713603
TMEM134	-0.335193	9.23484	-5.25259	5.22468e-07	4.34244e-05	5.94249	80194	ILMN_1770977
LILRB2	0.527204	9.51305	5.24982	5.29109e-07	4.386e-05	5.93058	10288	ILMN_1695744
TSPAN14	0.591531	8.88878	5.24643	5.37368e-07	4.43154e-05	5.91597	81619	ILMN_1785060
ELF2	-0.272712	8.08039	-5.2464	5.37431e-07	4.43154e-05	5.91586	1998	ILMN_1691559
FOXO1	-0.460098	9.46218	-5.24546	5.39745e-07	4.43894e-05	5.91181	2308	ILMN_1738816
UBQLN2	0.44891	9.5551	5.24347	5.44671e-07	4.46773e-05	5.90324	29978	ILMN_1680770
LDLR	0.683935	9.56728	5.24176	5.48925e-07	4.49082e-05	5.8959	3949	ILMN_2053415
HLA-DOB	-0.465128	8.91094	-5.24119	5.50352e-07	4.49082e-05	5.89345	3112	ILMN_1700428
NPAT	-0.415142	7.38288	-5.23862	5.56833e-07	4.5319e-05	5.88241	4863	ILMN_2120965
DOPEY2	-0.441279	8.84915	-5.23179	5.74425e-07	4.65833e-05	5.85307	9980	ILMN_1741711
H2AFJ	0.636394	10.4795	5.23144	5.75342e-07	4.65833e-05	5.85156	55766	ILMN_1708728
HNRPA2B1	0.531742	11.7627	5.21574	6.17934e-07	4.9903e-05	5.78421	3181	ILMN_2369682
C3AR1	0.830685	8.37674	5.21422	6.22202e-07	5.01185e-05	5.77772	719	ILMN_1787529
CNIH4	0.514214	9.90903	5.2131	6.25393e-07	5.02463e-05	5.7729	29097	ILMN_1714759
TADA2B	-0.347045	8.80127	-5.21135	6.30383e-07	5.05177e-05	5.7654	93624	ILMN_3239378
LOC100132761	-0.803086	8.52025	-5.20792	6.40278e-07	5.11798e-05	5.75072	100132761	ILMN_3214893
BATF	0.669926	9.14457	5.20726	6.42184e-07	5.12015e-05	5.74792	10538	ILMN_1668822
MADD	-0.213852	7.52612	-5.20536	6.47748e-07	5.1514e-05	5.73978	8567	ILMN_1671710
LDHA	0.520089	11.4857	5.20424	6.51044e-07	5.16451e-05	5.735	3939	ILMN_1807106
C6orf173	0.520571	7.55159	5.20263	6.55835e-07	5.17929e-05	5.72808	387103	ILMN_1763907
AURKB	0.749962	7.71365	5.2025	6.56213e-07	5.17929e-05	5.72754	9212	ILMN_1684217
LOC728820	-0.571013	10.8185	-5.20106	6.60507e-07	5.20008e-05	5.72139	728820	ILMN_3226291
RELL1	-0.257626	7.29052	-5.20012	6.63336e-07	5.20926e-05	5.71736	768211	ILMN_3226955
KNTC1	0.331911	7.95303	5.19857	6.68022e-07	5.23295e-05	5.71072	9735	ILMN_1732516
CCNB1	0.321443	7.25562	5.19706	6.72598e-07	5.24432e-05	5.70429	891	ILMN_1712803
TNFRSF18	0.353527	7.12839	5.19669	6.73736e-07	5.24432e-05	5.70269	8784	ILMN_1743100
LMNB1	0.459945	8.55795	5.19644	6.74495e-07	5.24432e-05	5.70163	4001	ILMN_2126706
MIR488	-0.249132	7.36498	-5.19566	6.76883e-07	5.24987e-05	5.6983	574441	ILMN_3308778
MAMDC4	0.20795	6.81876	5.19489	6.79265e-07	5.25533e-05	5.69499	158056	ILMN_1740759
YME1L1	0.280798	9.07195	5.19299	6.85135e-07	5.28769e-05	5.68687	10730	ILMN_1734316
GMNN	0.449905	7.17993	5.19195	6.88376e-07	5.29965e-05	5.68243	51053	ILMN_1720114
MCM10	0.319292	7.00262	5.18835	6.99683e-07	5.3735e-05	5.66707	55388	ILMN_2413898
FAM83D	0.322235	6.89041	5.18718	7.03387e-07	5.38874e-05	5.66209	81610	ILMN_1781943
SPON2	0.575891	7.44991	5.18306	7.16657e-07	5.477e-05	5.64447	10417	ILMN_1676099
DNAJB12	-0.201134	7.76765	-5.17529	7.42297e-07	5.65916e-05	5.61133	54788	ILMN_1712929
CTLA4	0.957146	7.90467	5.17327	7.49101e-07	5.69054e-05	5.60273	1493	ILMN_1763487
MTMR14	-0.230149	9.36103	-5.17271	7.51006e-07	5.69054e-05	5.60034	64419	ILMN_1659240
TATDN2	-0.290959	9.10769	-5.17245	7.51862e-07	5.69054e-05	5.59926	9797	ILMN_1734138
TCN2	0.518583	7.59676	5.16791	7.67452e-07	5.78773e-05	5.57992	6948	ILMN_1740572
RNF19B	0.759784	9.07092	5.16731	7.69562e-07	5.78773e-05	5.57733	127544	ILMN_1682081
STMN3	-0.590211	10.6987	-5.16711	7.70245e-07	5.78773e-05	5.5765	50861	ILMN_3244117
CAMLG	-0.282255	10.8351	-5.16581	7.74778e-07	5.80787e-05	5.57097	819	ILMN_1714599
ALOX15	-0.373891	7.15722	-5.16518	7.76994e-07	5.81058e-05	5.56827	246	ILMN_1676042
CLYBL	-0.288154	7.38016	-5.16398	7.8121e-07	5.8282e-05	5.56317	171425	ILMN_1663538
ASGR1	-0.847635	9.07414	-5.16158	7.8971e-07	5.87762e-05	5.55297	432	ILMN_1769013
HDAC4	0.536023	8.11138	5.15915	7.98425e-07	5.9284e-05	5.54263	9759	ILMN_1764396
MGC16121	0.354111	7.36766	5.15509	8.13178e-07	6.02367e-05	5.52538	84848	ILMN_1673409
RPL12	-0.33603	13.0932	-5.15252	8.22684e-07	6.07971e-05	5.51442	6136	ILMN_1653469
H2AFX	0.449904	8.00509	5.14286	8.59294e-07	6.33532e-05	5.47339	3014	ILMN_2200331
LOC100130123	-0.329591	7.20454	-5.14087	8.67016e-07	6.37725e-05	5.46496	100130123	ILMN_3238283
MAPK14	0.309437	7.54969	5.138	8.78279e-07	6.44496e-05	5.4528	1432	ILMN_1720656
LOC441073	-0.36533	11.3284	-5.13338	8.96727e-07	6.56496e-05	5.43322	441073	ILMN_3213692
KIAA0913	0.409536	9.71061	5.13189	9.02777e-07	6.59385e-05	5.42688	23053	ILMN_1669433
ZFP36	0.356081	12.4134	5.12641	9.25306e-07	6.74268e-05	5.40366	7538	ILMN_1720829
SPG7	-0.315639	8.29717	-5.12506	9.30913e-07	6.76619e-05	5.39797	6687	ILMN_1675583
ADAT3	0.343748	7.57741	5.1246	9.3285e-07	6.76619e-05	5.39601	113179	ILMN_1806275
LOC389816	-0.241919	7.16718	-5.12206	9.43567e-07	6.82811e-05	5.38525	389816	ILMN_1722054
AFMID	-0.401109	7.42666	-5.12022	9.5141e-07	6.83576e-05	5.37745	125061	ILMN_1707551
FLOT1	0.469528	10.6697	5.12005	9.5211e-07	6.83576e-05	5.37676	10211	ILMN_1661439
CLDND2	0.701861	8.4733	5.11998	9.52405e-07	6.83576e-05	5.37646	125875	ILMN_2077680
LSM10	-0.332731	10.0743	-5.11976	9.53351e-07	6.83576e-05	5.37553	84967	ILMN_1751803
POTEF	0.233282	12.9588	5.11922	9.55662e-07	6.83669e-05	5.37325	728378	ILMN_1735698
YIPF4	0.315913	8.50453	5.11582	9.70389e-07	6.92623e-05	5.35884	84272	ILMN_1782444
CCNA2	0.662716	8.11204	5.11016	9.9536e-07	7.0839e-05	5.33491	890	ILMN_1786125
PLK4	0.400333	7.57724	5.10979	9.97e-07	7.0839e-05	5.33336	10733	ILMN_1789123
CD63	0.530324	10.5981	5.1081	1.00459e-06	7.12169e-05	5.32621	967	ILMN_1753468
THOC2	-0.397535	8.36186	-5.09279	1.07594e-06	7.61025e-05	5.26159	57187	ILMN_1696883
STX11	0.582729	11.0193	5.09183	1.08056e-06	7.62573e-05	5.25755	8676	ILMN_1720771
MMADHC	0.407666	9.69041	5.0911	1.08406e-06	7.63326e-05	5.2545	27249	ILMN_3248966
FCGR1B	0.957135	10.2391	5.08894	1.0946e-06	7.69017e-05	5.24539	2210	ILMN_2261600
CDC7	0.28939	7.46704	5.08593	1.10944e-06	7.77699e-05	5.23271	8317	ILMN_1741801
PPP1R16B	0.455544	9.29966	5.08339	1.12214e-06	7.84847e-05	5.22199	26051	ILMN_1727098
ANXA11	-0.350766	8.48368	-5.08063	1.13603e-06	7.92598e-05	5.21041	311	ILMN_1685170
FLJ43093	-0.551112	7.52823	-5.08019	1.13828e-06	7.92598e-05	5.20854	401258	ILMN_2123450
VEZT	-0.24487	7.67027	-5.07592	1.1602e-06	8.02868e-05	5.19059	55591	ILMN_1774828
ATAD2	0.415847	7.66616	5.07587	1.16049e-06	8.02868e-05	5.19035	29028	ILMN_2048700
ATP1B3	0.346439	8.87897	5.07582	1.16072e-06	8.02868e-05	5.19016	483	ILMN_1654322
DDX18	-0.413755	9.87002	-5.07359	1.17234e-06	8.09124e-05	5.18078	8886	ILMN_1756220
LOC646993	2.84138	9.10742	5.07248	1.17816e-06	8.11353e-05	5.17612	646993	ILMN_3294365
PLXNA3	0.30317	7.13818	5.06634	1.2109e-06	8.30658e-05	5.15031	55558	ILMN_1719972
OSBPL1A	-0.238791	7.11476	-5.06623	1.2115e-06	8.30658e-05	5.14985	114876	ILMN_1697952
FCGR1C	0.916204	9.64842	5.06318	1.22813e-06	8.40082e-05	5.13701	100132417	ILMN_3247506
DGCR6	-0.420304	8.89102	-5.06272	1.2306e-06	8.40082e-05	5.13512	8214	ILMN_1663685
EXO1	0.168128	6.81615	5.06005	1.24538e-06	8.4832e-05	5.12388	9156	ILMN_1673721
ODF2	0.203687	7.67024	5.059	1.25122e-06	8.5045e-05	5.11947	4957	ILMN_1671288
DHCR24	0.435379	7.09783	5.05767	1.25867e-06	8.53462e-05	5.11388	1718	ILMN_1725510
MGAM	0.416055	7.88785	5.05723	1.2611e-06	8.53462e-05	5.11207	8972	ILMN_1683897
GCLM	0.413302	8.25531	5.05569	1.26979e-06	8.57492e-05	5.1056	2730	ILMN_1788547
TCF20	-0.221218	7.71774	-5.04725	1.31845e-06	8.88439e-05	5.0702	6942	ILMN_1660144
KIR3DL1	0.757271	7.96402	5.03836	1.3716e-06	9.21918e-05	5.033	3811	ILMN_1733245
RNF24	0.488407	9.94495	5.03797	1.37402e-06	9.21918e-05	5.03135	11237	ILMN_1717809
GADD45B	0.47408	9.67515	5.03115	1.41626e-06	9.45815e-05	5.00285	4616	ILMN_1718977
PLEKHG3	-0.586857	9.07927	-5.03108	1.41674e-06	9.45815e-05	5.00253	26030	ILMN_1780671
DUSP1	0.566412	11.6327	5.03077	1.41869e-06	9.45815e-05	5.00123	1843	ILMN_1781285
BRI3	0.407927	11.6208	5.02838	1.43382e-06	9.53869e-05	4.99125	25798	ILMN_1781580
HIST1H3D	0.488461	7.43938	5.02734	1.44044e-06	9.56243e-05	4.98692	8351	ILMN_1721127
CPVL	-0.814636	10.3378	-5.02228	1.47317e-06	9.75903e-05	4.96577	54504	ILMN_1682928
KILLIN	-0.364551	7.14901	-5.0216	1.47761e-06	9.7678e-05	4.96294	100144748	ILMN_3238213
LOC728153	-0.47721	8.33023	-5.01645	1.51173e-06	9.96153e-05	4.94146	728153	ILMN_1771048
LOC653156	-0.997742	9.56624	-5.01622	1.51327e-06	9.96153e-05	4.9405	653156	ILMN_3278157
PAPD1	-0.275736	8.14434	-5.01381	1.52955e-06	0.000100249	4.93043	55149	ILMN_1742569
NBEAL2	0.478552	9.77004	5.01353	1.53143e-06	0.000100249	4.92927	23218	ILMN_1660629
ME2	0.322143	9.32119	5.01338	1.5325e-06	0.000100249	4.92862	4200	ILMN_1675186
MKNK1	0.365377	8.66339	5.01217	1.54071e-06	0.000100576	4.92359	8569	ILMN_1725738
ASPHD2	0.552652	8.07737	5.00872	1.56447e-06	0.000101915	4.90919	57168	ILMN_2167426
CTDSPL2	-0.25497	7.69706	-5.00226	1.60981e-06	0.000104651	4.88231	51496	ILMN_1665655
ETS2	0.468559	9.16949	4.99495	1.66272e-06	0.000107867	4.85189	2114	ILMN_1720158
OLIG2	-0.770445	7.30717	-4.99308	1.67658e-06	0.000108541	4.84408	10215	ILMN_1727567
NELL2	-0.710595	8.74885	-4.98971	1.70167e-06	0.000109806	4.8301	4753	ILMN_1725417
GNG11	-0.677935	11.1372	-4.98952	1.70312e-06	0.000109806	4.8293	2791	ILMN_1782419
C2	0.390693	7.529	4.98898	1.7072e-06	0.000109843	4.82705	717	ILMN_1710740
JTB	0.288285	12.604	4.98267	1.75546e-06	0.000112716	4.80083	10899	ILMN_2206716
PARL	-0.3288	9.3953	-4.9813	1.76608e-06	0.000113166	4.79516	55486	ILMN_1731354
LOC388275	-0.719014	9.52645	-4.97974	1.77832e-06	0.000113718	4.78866	388275	ILMN_1676091
TIMELESS	0.478991	8.31434	4.97883	1.78542e-06	0.00011394	4.78491	8914	ILMN_1735093
PRDM1	0.371417	7.89148	4.97708	1.79931e-06	0.000114593	4.77762	639	ILMN_1655077
ADK	-0.231089	7.56594	-4.97322	1.83016e-06	0.000116321	4.76163	132	ILMN_1768062
TRIM41	0.254142	8.65919	4.97195	1.84049e-06	0.000116655	4.75634	90933	ILMN_1729495
YPEL1	-0.396404	7.87216	-4.97165	1.84287e-06	0.000116655	4.75513	29799	ILMN_1795338
SNRPD3	-0.826144	8.04462	-4.97104	1.84789e-06	0.000116738	4.75256	6634	ILMN_1794599
PROSC	0.332939	9.77947	4.97051	1.85219e-06	0.000116773	4.75038	11212	ILMN_1748908
C3orf19	-0.270629	9.3251	-4.96559	1.89276e-06	0.000119092	4.73	51244	ILMN_1750144
C20orf3	0.576906	10.1127	4.95715	1.96442e-06	0.000123353	4.69506	57136	ILMN_1674394
CDKN3	0.608038	7.4357	4.95507	1.9825e-06	0.000124239	4.68644	1033	ILMN_1666305
SCNM1	-0.306183	9.00978	-4.95371	1.99438e-06	0.000124735	4.68082	79005	ILMN_1746598
LOC653438	0.410532	9.57848	4.95194	2.00997e-06	0.000125331	4.6735	653438	ILMN_1699164
LOC644907	-0.583474	11.6473	-4.95172	2.01191e-06	0.000125331	4.67259	644907	ILMN_3241051
LOC644315	-0.436817	10.9038	-4.9504	2.02359e-06	0.000125808	4.66715	644315	ILMN_3209676
CKAP2L	0.38442	7.06013	4.94874	2.03842e-06	0.000126332	4.66029	150468	ILMN_1751776
TNFRSF21	-0.371164	7.35961	-4.94856	2.04008e-06	0.000126332	4.65952	27242	ILMN_1699695
LOC100129599	-0.554394	8.9112	-4.94768	2.04795e-06	0.000126569	4.6559	100129599	ILMN_3266944
TCIRG1	0.378989	9.47546	4.94411	2.08037e-06	0.000128319	4.64113	10312	ILMN_1694486
APBA3	0.341504	9.49303	4.93889	2.12859e-06	0.000131036	4.61959	9546	ILMN_1686610
LOC653171	0.406513	8.39787	4.93266	2.18755e-06	0.000134401	4.59391	653171	ILMN_1715702
C13orf18	-0.405971	8.77558	-4.9319	2.19483e-06	0.000134585	4.59078	80183	ILMN_1773388
RPL15	-0.411481	11.8862	-4.93065	2.20694e-06	0.000134891	4.58561	6138	ILMN_1762747
MYL6	0.223051	13.615	4.93049	2.20844e-06	0.000134891	4.58497	4637	ILMN_1809013
FKSG30	0.407557	12.4726	4.92895	2.2234e-06	0.000135541	4.57862	440915	ILMN_1814998
LOC728060	-0.44719	8.25855	-4.92653	2.24709e-06	0.000136642	4.56866	728060	ILMN_3209631
PARP3	0.28084	7.69536	4.92622	2.25019e-06	0.000136642	4.56737	10039	ILMN_1703411
C20orf24	0.377921	12.5594	4.92505	2.26181e-06	0.00013692	4.56253	55969	ILMN_1679195
LOC643863	-0.320662	13.5422	-4.92487	2.2635e-06	0.00013692	4.56182	643863	ILMN_3290497
UBASH3B	0.286062	7.27291	4.92153	2.2969e-06	0.000138562	4.54805	84959	ILMN_3249435
PPP2CA	0.271441	10.8848	4.92127	2.29948e-06	0.000138562	4.547	5515	ILMN_1722858
MCOLN2	0.593226	8.79828	4.91824	2.33028e-06	0.000140148	4.53449	255231	ILMN_1660462
PUS10	0.195191	6.82823	4.91555	2.35788e-06	0.000141536	4.52342	150962	ILMN_1810591
RPL4	-0.420229	12.6544	-4.91455	2.36818e-06	0.000141883	4.51933	6124	ILMN_1752285
KIR3DL3	0.525077	7.23946	4.91216	2.39308e-06	0.000143101	4.5095	115653	ILMN_1733426
LOC440731	0.474997	8.20002	4.90578	2.46072e-06	0.000146865	4.4833	440731	ILMN_1683250
ETFDH	0.30335	8.20768	4.90288	2.49218e-06	0.000148262	4.47137	2110	ILMN_1758034
KCNJ15	0.52042	8.03788	4.90275	2.49359e-06	0.000148262	4.47083	3772	ILMN_1659770
LOC642083	0.547691	8.02942	4.90066	2.51638e-06	0.000149056	4.46229	642083	ILMN_1680772
ECT2	0.248816	7.18393	4.90045	2.51877e-06	0.000149056	4.46139	1894	ILMN_1717173
CCDC24	0.367713	7.34232	4.90022	2.52122e-06	0.000149056	4.46048	149473	ILMN_1718771
DTNBP1	0.269913	7.43757	4.89956	2.52858e-06	0.000149185	4.45774	84062	ILMN_1682960
COMMD6	-0.314368	10.8901	-4.89916	2.53292e-06	0.000149185	4.45613	170622	ILMN_1759997
TRAPPC6A	-0.451908	8.97231	-4.8985	2.54024e-06	0.000149336	4.45342	79090	ILMN_1775703
LOC100008589	1.04352	10.6278	4.89801	2.54566e-06	0.000149374	4.45141	100008589	ILMN_1733559
C12orf45	-0.358995	7.97051	-4.89131	2.62128e-06	0.000153524	4.42391	121053	ILMN_1728435
RPA2	-0.282476	10.5281	-4.88802	2.65915e-06	0.000155451	4.41043	6118	ILMN_1753582
LOC100134563	0.314836	7.11226	4.88749	2.66527e-06	0.000155519	4.40827	100134563	ILMN_3241598
RFC4	0.417813	8.4444	4.88699	2.67116e-06	0.000155573	4.4062	5984	ILMN_1724489
SUSD3	-0.528934	9.38003	-4.8853	2.69089e-06	0.000156431	4.39928	203328	ILMN_1785570
BCKDHA	-0.514741	8.85389	-4.88473	2.6976e-06	0.00015653	4.39695	593	ILMN_1735979
C11orf82	0.438055	7.83213	4.88237	2.72548e-06	0.000157856	4.38728	220042	ILMN_1790100
LOC100130476	-0.232223	7.45762	-4.88097	2.74213e-06	0.000158527	4.38156	100130476	ILMN_3257004
PHF19	0.285485	8.32639	4.88023	2.75099e-06	0.000158747	4.37853	26147	ILMN_1713249
HEATR2	-0.28641	7.79725	-4.8791	2.7645e-06	0.000159233	4.37393	54919	ILMN_1732537
MAN2B1	-0.346706	8.87288	-4.87831	2.77412e-06	0.000159236	4.37067	4125	ILMN_1759341
LOC440311	-0.52873	9.32313	-4.87826	2.77471e-06	0.000159236	4.37047	440311	ILMN_3202591
GNG5	0.444522	9.24144	4.8769	2.79113e-06	0.000159885	4.36492	2787	ILMN_1701854
DUSP3	0.464306	10.275	4.87217	2.84914e-06	0.000162911	4.3456	1845	ILMN_1797522
TUBA1A	0.33473	12.4428	4.87162	2.85603e-06	0.000163007	4.34333	7846	ILMN_1742981
TMEM14D	-0.548803	10.0467	-4.86978	2.87897e-06	0.000164018	4.33581	645203	ILMN_3244248
LOC441506	-0.482578	11.2587	-4.86851	2.89488e-06	0.000164624	4.33064	441506	ILMN_3219764
LOC729236	-0.480142	11.3107	-4.86773	2.90481e-06	0.00016489	4.32742	729236	ILMN_3227529
PLK1	0.287283	7.25079	4.86563	2.93139e-06	0.000166071	4.31887	5347	ILMN_1736176
C12orf10	-0.513706	9.94875	-4.86525	2.93622e-06	0.000166071	4.31732	60314	ILMN_1777765
FAM129C	-0.405199	8.20415	-4.86352	2.95838e-06	0.000166999	4.31026	199786	ILMN_1664063
RAB24	0.459605	10.5273	4.86314	2.96329e-06	0.000166999	4.3087	53917	ILMN_1677843
GTSE1	0.30658	7.10634	4.8559	3.05803e-06	0.000172029	4.27914	51512	ILMN_1771039
INO80E	0.402947	8.75679	4.85368	3.08756e-06	0.000173379	4.27012	283899	ILMN_1724406
SLC9A8	0.415648	8.19302	4.85259	3.10229e-06	0.000173895	4.26565	23315	ILMN_1690625
C4orf34	-0.297569	10.2252	-4.8516	3.11554e-06	0.000174326	4.26164	201895	ILMN_1713892
LOC100131905	-0.650421	11.1451	-4.85116	3.1216e-06	0.000174353	4.25982	100131905	ILMN_3275489
LITAF	0.467933	12.8671	4.84843	3.15874e-06	0.000176114	4.24871	9516	ILMN_1713934
PI16	-0.317149	7.37281	-4.8438	3.22282e-06	0.000179202	4.22985	221476	ILMN_1766264
DBP	-0.361589	7.89105	-4.8436	3.22556e-06	0.000179202	4.22905	1628	ILMN_1715555
BMX	0.348872	7.47523	4.83855	3.2969e-06	0.000182841	4.20851	660	ILMN_1672307
CD97	0.336816	12.0186	4.83573	3.33746e-06	0.000184646	4.19703	976	ILMN_1673363
ATP5B	0.261314	13.2845	4.83547	3.34123e-06	0.000184646	4.19597	506	ILMN_1772132
GNG7	-0.384048	8.75094	-4.83489	3.3496e-06	0.000184782	4.19362	2788	ILMN_1728107
CDCA3	0.353456	6.90616	4.83348	3.37016e-06	0.00018559	4.18788	83461	ILMN_1737728
TSPAN5	-1.29691	10.0664	-4.82062	3.56286e-06	0.000195858	4.13568	10098	ILMN_1799028
OGFR	0.338554	9.37266	4.81434	3.66077e-06	0.000200887	4.11023	11054	ILMN_1728224
RPL23AP7	-0.31652	8.049	-4.81376	3.67007e-06	0.000201045	4.10785	118433	ILMN_1750273
ABCA2	0.378301	7.2798	4.81233	3.69267e-06	0.000201931	4.10208	20	ILMN_1687636
INSL3	0.50292	7.28665	4.8118	3.70113e-06	0.000202041	4.09994	3640	ILMN_2226271
RBM3	-0.38052	8.14536	-4.8079	3.76395e-06	0.000204816	4.08414	5935	ILMN_1698213
CASP2	-0.222343	9.38303	-4.80784	3.76505e-06	0.000204816	4.08387	835	ILMN_1736568
AGTRAP	0.390712	9.50168	4.80703	3.77816e-06	0.000205173	4.0806	57085	ILMN_1802458
SAMSN1	0.624957	8.78657	4.80506	3.81036e-06	0.000206564	4.07264	64092	ILMN_1684887
IGF2BP3	0.558935	7.67493	4.80459	3.81804e-06	0.000206623	4.07075	10643	ILMN_1807423
STXBP2	0.616242	11.285	4.80194	3.86201e-06	0.000208642	4.06	6813	ILMN_2159453
LRP10	0.497545	11.6172	4.80048	3.88632e-06	0.000209593	4.05411	26020	ILMN_1670272
SAT1	0.453233	12.9343	4.79886	3.91351e-06	0.000210698	4.04757	6303	ILMN_1753342
PPP2R2D	-0.190718	8.27105	-4.79783	3.93099e-06	0.000211275	4.04339	55844	ILMN_1683589
FBXO6	0.745453	9.59743	4.79586	3.96452e-06	0.000212713	4.03541	26270	ILMN_1701455
NHP2L1	-0.302749	9.67593	-4.79474	3.98372e-06	0.00021321	4.03088	4809	ILMN_1697614
AGPS	0.310228	8.04587	4.79452	3.98739e-06	0.00021321	4.03002	8540	ILMN_1698209
PPP1CB	-0.308097	8.79859	-4.79058	4.05571e-06	0.000216493	4.01407	5500	ILMN_2405018
ZSWIM1	-0.409127	8.53684	-4.78776	4.10521e-06	0.000218516	4.00269	90204	ILMN_1812856
TOB1	-0.524929	9.07548	-4.78762	4.10756e-06	0.000218516	4.00215	10140	ILMN_1672004
CYBASC3	-0.316201	10.0524	-4.78218	4.2048e-06	0.000223311	3.9802	220002	ILMN_2129505
DSTN	0.304736	8.47126	4.77933	4.25665e-06	0.000225682	3.9687	11034	ILMN_1706426
SOCS1	0.876214	8.53304	4.77566	4.32437e-06	0.000228885	3.95389	8651	ILMN_1774733
LOC389286	-0.797287	8.26084	-4.77453	4.34524e-06	0.000229386	3.94938	389286	ILMN_2170625
CD274	0.521993	6.96657	4.77436	4.34848e-06	0.000229386	3.94868	29126	ILMN_1701914
SQLE	0.407235	8.11597	4.77271	4.37931e-06	0.000230624	3.94205	6713	ILMN_1772241
CERK	-0.30266	9.10096	-4.77208	4.39121e-06	0.000230863	3.9395	64781	ILMN_1721325
PHF20	-0.28362	8.50343	-4.7694	4.44209e-06	0.000233146	3.9287	51230	ILMN_1813657
ZNF326	-0.207634	7.18534	-4.76898	4.45016e-06	0.00023315	3.92699	284695	ILMN_1662021
GPR44	-0.689679	7.11654	-4.76862	4.45703e-06	0.00023315	3.92554	11251	ILMN_1703326
PFN1	0.198818	14.0109	4.76811	4.46678e-06	0.00023327	3.9235	5216	ILMN_1712950
CDC2L6	-0.301113	9.6116	-4.76414	4.54334e-06	0.000236873	3.90755	23097	ILMN_1676891
PKN3	0.207013	6.95452	4.76308	4.56405e-06	0.000237445	3.90329	29941	ILMN_1797184
KRBA1	-0.322731	7.7637	-4.76281	4.56946e-06	0.000237445	3.90218	84626	ILMN_3239060
C2orf89	-0.49485	8.35582	-4.76104	4.60418e-06	0.000238853	3.89508	129293	ILMN_3235176
SRRM1	-0.274247	9.89049	-4.75814	4.66182e-06	0.000241444	3.8834	10250	ILMN_1697670
TMEM110	0.312109	7.05965	4.75646	4.69548e-06	0.000242786	3.87666	375346	ILMN_1705224
ZFAND1	-0.228386	7.8772	-4.75602	4.70421e-06	0.000242836	3.87492	79752	ILMN_1730907
LOC100128353	-0.270072	10.0694	-4.75239	4.77791e-06	0.000246235	3.86034	100128353	ILMN_3268165
ZNF101	-0.479543	7.63702	-4.7488	4.85206e-06	0.000249646	3.84589	94039	ILMN_1695079
TUBB4	0.259798	7.34285	4.74818	4.86489e-06	0.000249896	3.84342	10382	ILMN_1682459
PIP4K2C	0.299839	7.92552	4.74764	4.87601e-06	0.000250057	3.84127	79837	ILMN_1787308
TGFBR2	-0.319138	10.4402	-4.74709	4.88751e-06	0.000250237	3.83906	7048	ILMN_1726245
LOC729279	-0.33997	11.9601	-4.74616	4.90706e-06	0.000250828	3.83532	729279	ILMN_3228294
RPS6P1	-0.442595	11.2806	-4.74026	5.03236e-06	0.000256402	3.81168	440086	ILMN_3220888
SIAH1	-0.207478	8.64369	-4.74026	5.03246e-06	0.000256402	3.81166	6477	ILMN_1661161
SIK3	-0.320602	9.7417	-4.73981	5.04217e-06	0.00025648	3.80985	23387	ILMN_1732343
HIST2H2AC	0.710468	10.8481	4.73815	5.07811e-06	0.000257889	3.80319	8338	ILMN_1768973
ETNK1	0.162358	7.15994	4.73565	5.1325e-06	0.000259898	3.7932	55500	ILMN_1686937
WAS	0.434857	12.4536	4.73557	5.13426e-06	0.000259898	3.79288	7454	ILMN_1760027
LCP1	0.297295	13.7256	4.73402	5.16832e-06	0.0002612	3.78668	3936	ILMN_1662932
DHRS9	0.730782	9.21594	4.73074	5.24118e-06	0.000264434	3.77355	10170	ILMN_1727150
CDK2	0.355112	8.00373	4.72976	5.26319e-06	0.000264434	3.76962	1017	ILMN_1653443
NDUFAB1	0.381185	10.1354	4.72976	5.26332e-06	0.000264434	3.7696	4706	ILMN_2179018
BTF3L4	-0.286958	8.3401	-4.72963	5.26606e-06	0.000264434	3.76911	91408	ILMN_1759359
TCF25	-0.339643	10.7468	-4.72829	5.29635e-06	0.000265529	3.76373	22980	ILMN_1814971
COPA	0.305812	11.0175	4.72714	5.3224e-06	0.000266409	3.75913	1314	ILMN_1811615
PPP1R3D	0.292996	8.15162	4.72596	5.3493e-06	0.000267328	3.75441	5509	ILMN_1781198
CENPN	0.458783	7.62898	4.72369	5.40136e-06	0.0002695	3.74533	55839	ILMN_1720526
PGLYRP1	0.968109	9.62221	4.72284	5.42096e-06	0.000269656	3.74193	8993	ILMN_1704870
CCNE2	0.218683	6.85593	4.72281	5.4217e-06	0.000269656	3.7418	9134	ILMN_1651260
FAS	0.395536	7.62305	4.72001	5.48677e-06	0.00027246	3.73062	355	ILMN_1808132
TAP1	0.572833	12.6027	4.71947	5.49938e-06	0.000272655	3.72847	6890	ILMN_1751079
SUV420H1	-0.217515	7.87341	-4.71892	5.51229e-06	0.000272863	3.72627	51111	ILMN_1669598
CDT1	0.637002	7.57505	4.71834	5.52586e-06	0.000273103	3.72396	81620	ILMN_1651237
LOC100132199	-0.472045	8.05316	-4.71726	5.5513e-06	0.000273928	3.71966	100132199	ILMN_3289730
RAD54L	0.263443	7.01974	4.71656	5.56792e-06	0.000274316	3.71686	8438	ILMN_1658027
TUBA1C	0.400088	11.7537	4.71595	5.58246e-06	0.000274601	3.71441	84790	ILMN_1742167
LOC388707	-0.437063	10.9565	-4.71548	5.59369e-06	0.000274722	3.71253	388707	ILMN_3198247
ERI1	0.484938	8.25085	4.71304	5.65194e-06	0.000277149	3.70281	90459	ILMN_3245659
EPN1	0.381268	11.1481	4.7126	5.66258e-06	0.000277236	3.70105	29924	ILMN_1772981
LOC440991	-0.505972	9.19109	-4.71051	5.71314e-06	0.000279275	3.69272	440991	ILMN_3283449
MYST1	-0.348362	8.92519	-4.70939	5.74044e-06	0.000280173	3.68825	84148	ILMN_1804679
UPP1	0.485397	9.53117	4.70825	5.76831e-06	0.000280826	3.68371	7378	ILMN_1742764
ABI3	0.478853	9.0709	4.70811	5.77174e-06	0.000280826	3.68315	51225	ILMN_1755658
RBCK1	0.46527	10.0083	4.70674	5.80571e-06	0.000282041	3.67765	10616	ILMN_1751330
LOC283412	-0.362352	12.7295	-4.7049	5.85114e-06	0.000283807	3.67035	283412	ILMN_1675460
KLF13	-0.356253	11.3281	-4.70383	5.87786e-06	0.000284663	3.66608	51621	ILMN_1679929
LOC642678	-0.399926	7.28347	-4.70095	5.95027e-06	0.000287725	3.6546	642678	ILMN_1796206
FAM65A	-0.48016	9.56723	-4.69837	6.01577e-06	0.000290444	3.64434	79567	ILMN_1680037
ADRM1	0.25019	9.89293	4.69727	6.04417e-06	0.000291285	3.63993	11047	ILMN_1760143
PSME3	0.398677	8.83882	4.69697	6.05178e-06	0.000291285	3.63875	10197	ILMN_1800975
PAK2	-0.390082	9.01891	-4.69585	6.08053e-06	0.00029222	3.63431	5062	ILMN_1659878
HCG4	0.455763	11.5304	4.69502	6.10199e-06	0.000292802	3.63101	54435	ILMN_1660923
LOC100132299	-0.35721	9.28095	-4.69363	6.13834e-06	0.000294096	3.62544	100132299	ILMN_3249261
RASSF4	-0.275356	7.20776	-4.69187	6.18414e-06	0.000295456	3.61847	83937	ILMN_1690566
FLJ42627	-0.224801	7.31274	-4.69182	6.18559e-06	0.000295456	3.61825	645644	ILMN_3238221
CUEDC1	-0.487748	7.85814	-4.69145	6.1952e-06	0.000295465	3.6168	404093	ILMN_1676665
KIF1B	0.31427	8.16205	4.68796	6.28786e-06	0.000299428	3.60289	23095	ILMN_1659444
FBLN2	-0.250662	7.17351	-4.68709	6.31111e-06	0.000299472	3.59943	2199	ILMN_1721769
LOC648761	-0.186295	6.95352	-4.68685	6.31735e-06	0.000299472	3.5985	648761	ILMN_1750657
COG2	-0.285255	8.62688	-4.68685	6.31746e-06	0.000299472	3.59849	22796	ILMN_1776993
TIMM10	0.876248	9.16549	4.68547	6.35437e-06	0.000300724	3.59303	26519	ILMN_1765332
P2RY8	-0.403025	10.3576	-4.68482	6.3719e-06	0.000300724	3.59045	286530	ILMN_1768284
SELP	0.408358	7.30531	4.6848	6.37264e-06	0.000300724	3.59034	6403	ILMN_1715417
SLC27A2	0.433674	7.18503	4.68332	6.41265e-06	0.000302157	3.58447	11001	ILMN_1700831
KBTBD11	-0.581542	8.6127	-4.68161	6.45926e-06	0.000303895	3.57769	9920	ILMN_1784630
C5orf20	-0.240301	7.30083	-4.67596	6.6157e-06	0.000310789	3.55526	140947	ILMN_1701911
MEF2D	-0.404165	8.78104	-4.67276	6.70617e-06	0.000314568	3.54254	4209	ILMN_1763228
GBA	0.364045	9.31913	4.67102	6.75567e-06	0.000316416	3.53565	2629	ILMN_1755123
GPR84	0.98042	8.36672	4.66827	6.83478e-06	0.000319643	3.52474	53831	ILMN_1785345
CDS2	0.387904	8.43399	4.66761	6.85374e-06	0.000320052	3.52215	8760	ILMN_1790973
LOC389404	-0.442001	12.0337	-4.66707	6.8696e-06	0.000320089	3.51998	389404	ILMN_3200661
SPI1	0.506944	11.4581	4.66688	6.87496e-06	0.000320089	3.51925	6688	ILMN_1696463
LOC389672	-0.434676	8.38731	-4.66642	6.88835e-06	0.000320237	3.51743	389672	ILMN_1679700
TMEM150A	-0.316479	8.22951	-4.66472	6.93826e-06	0.000322079	3.51067	129303	ILMN_2299612
FRMPD3	0.355826	7.55472	4.66417	6.95429e-06	0.000322346	3.50851	84443	ILMN_1753507
BUD31	0.222837	10.8694	4.66356	6.97214e-06	0.000322653	3.50611	8896	ILMN_1710697
DCI	-0.453927	8.54416	-4.66325	6.98152e-06	0.000322653	3.50485	1632	ILMN_2049303
SAMD9L	0.777361	9.84917	4.66117	7.04294e-06	0.000325012	3.49664	219285	ILMN_1799467
PPP2R4	0.262647	7.94406	4.65971	7.08669e-06	0.000326551	3.49084	5524	ILMN_1652249
KIR2DL5A	0.28958	7.01127	4.65892	7.11027e-06	0.000327156	3.48773	57292	ILMN_1685843
MVP	0.337456	10.6045	4.65714	7.1641e-06	0.000329115	3.48066	9961	ILMN_1803277
TIGA1	-0.420708	9.93578	-4.65681	7.17386e-06	0.000329115	3.47939	114915	ILMN_1654609
TSC22D4	0.348729	9.11772	4.65607	7.19638e-06	0.000329666	3.47645	81628	ILMN_1721636
N4BP2L2	0.330149	7.50122	4.65419	7.2538e-06	0.000331394	3.46901	10443	ILMN_3229189
KTELC1	-0.267884	8.74245	-4.65414	7.25526e-06	0.000331394	3.46882	56983	ILMN_1774800
RALB	0.339529	11.2982	4.65091	7.35499e-06	0.00033546	3.45603	5899	ILMN_1676358
HMHA1	-0.425106	10.2429	-4.64963	7.3948e-06	0.000336786	3.45098	23526	ILMN_1811392
NFIL3	0.369408	9.09171	4.64823	7.43849e-06	0.000338284	3.44546	4783	ILMN_1707312
LAPTM4B	0.628967	8.07471	4.64618	7.5032e-06	0.000340294	3.43735	55353	ILMN_1680196
TRIP13	0.433544	7.64701	4.64614	7.50441e-06	0.000340294	3.4372	9319	ILMN_1796589
PHRF1	-0.282755	9.55528	-4.6441	7.56918e-06	0.000342735	3.42915	57661	ILMN_1766593
SF3A3	-0.489915	10.11	-4.64336	7.59287e-06	0.000343312	3.42623	10946	ILMN_1705151
ACSL1	0.493176	10.6627	4.64088	7.67252e-06	0.000346413	3.41645	2180	ILMN_1684585
AMICA1	-0.444792	11.601	-4.6359	7.8354e-06	0.000353258	3.39678	120425	ILMN_1778723
FCRL3	0.475984	8.68253	4.63531	7.85479e-06	0.000353624	3.39447	115352	ILMN_1691693
DNAJC8	-0.283997	11.0396	-4.63406	7.89643e-06	0.000354214	3.38952	22826	ILMN_1698258
TUBG1	0.378059	7.67957	4.63396	7.89955e-06	0.000354214	3.38915	7283	ILMN_1663607
LOC642684	0.410863	8.01206	4.63389	7.90182e-06	0.000354214	3.38888	642684	ILMN_1700855
PF4V1	-0.72031	9.27245	-4.63291	7.93472e-06	0.000355181	3.38499	5197	ILMN_1745522
LOC648189	0.279809	7.40261	4.63171	7.97491e-06	0.000356471	3.38026	648189	ILMN_1689876
CYP27A1	-0.875688	8.73861	-4.62846	8.08473e-06	0.000360865	3.36745	1593	ILMN_1704985
ABHD2	0.221804	7.48446	4.62718	8.1283e-06	0.000362293	3.36242	11057	ILMN_1723662
ITGAM	0.554227	10.6666	4.6236	8.25149e-06	0.000367262	3.34834	3684	ILMN_1685009
C11orf2	-0.407685	10.8833	-4.62157	8.32204e-06	0.000369876	3.34037	738	ILMN_2077094
JUNB	0.458645	9.50596	4.61977	8.3855e-06	0.000372169	3.33326	3726	ILMN_2086077
BTBD11	-0.238041	7.29536	-4.61658	8.49835e-06	0.000376644	3.32074	121551	ILMN_1654153
LOC651436	-0.433231	13.1304	-4.61184	8.6694e-06	0.000383331	3.30209	651436	ILMN_1769277
TRAK1	-0.201693	8.16917	-4.61172	8.6737e-06	0.000383331	3.30163	22906	ILMN_1782069
ZNF319	0.293784	9.41241	4.6095	8.75491e-06	0.000386375	3.2929	57567	ILMN_1711361
CPT1A	0.158373	7.14483	4.60904	8.77159e-06	0.000386567	3.29112	1374	ILMN_1687589
HSPC159	0.362408	7.33331	4.60855	8.78985e-06	0.000386806	3.28917	29094	ILMN_1673548
UXT	-0.276206	10.741	-4.60823	8.80172e-06	0.000386806	3.28791	8409	ILMN_1671314
RGS18	-0.510877	10.8209	-4.60616	8.87844e-06	0.000389632	3.27979	64407	ILMN_2101278
LOC644988	0.361445	10.2305	4.60471	8.93263e-06	0.000391462	3.27409	644988	ILMN_3201485
CCRL2	0.700637	7.91773	4.59989	9.11474e-06	0.000398885	3.2552	9034	ILMN_3190833
LPCAT3	0.302024	8.91691	4.59776	9.19622e-06	0.000401889	3.24688	10162	ILMN_1805225
RPL17	-0.262287	12.8162	-4.5965	9.24496e-06	0.000403456	3.24193	6139	ILMN_1655422
CENPM	0.503237	7.74913	4.59472	9.31432e-06	0.000405918	3.23493	79019	ILMN_1668814
BATF2	0.811094	7.82063	4.5909	9.46419e-06	0.000411593	3.22	116071	ILMN_1690241
MMRN1	0.484205	7.21692	4.59074	9.47081e-06	0.000411593	3.21934	22915	ILMN_1660114
HLA-DMB	-0.590383	11.6213	-4.5902	9.49185e-06	0.000411936	3.21727	3109	ILMN_1761733
RPL12P6	-0.664491	8.23219	-4.58784	9.58601e-06	0.000415447	3.20803	440176	ILMN_3226244
LOC442232	-0.394587	7.73204	-4.5874	9.60381e-06	0.000415643	3.2063	442232	ILMN_3201365
POLR2A	0.295	10.8029	4.58407	9.73846e-06	0.00042089	3.19327	5430	ILMN_1782385
HEG1	0.358959	8.27221	4.58304	9.78066e-06	0.000422131	3.18922	57493	ILMN_1666122
PTTG3P	0.610794	8.32846	4.58252	9.80186e-06	0.000422464	3.1872	26255	ILMN_2049021
LOC728635	-0.452441	8.67836	-4.58195	9.82514e-06	0.000422867	3.18498	728635	ILMN_1676014
SNHG8	-0.307745	8.32263	-4.58142	9.84678e-06	0.000422867	3.18292	440957	ILMN_1815658
TMEM204	-0.591316	8.89466	-4.5813	9.85169e-06	0.000422867	3.18245	79652	ILMN_3241657
MRPS25	-0.37673	7.86194	-4.57931	9.93399e-06	0.000425816	3.17467	64432	ILMN_1798826
THOP1	0.318092	7.7025	4.57719	1.00226e-05	0.000428608	3.16636	7064	ILMN_1726659
WDR4	0.259892	8.06956	4.57709	1.00265e-05	0.000428608	3.166	10785	ILMN_1656628
SF3B2	-0.302826	10.3619	-4.57346	1.01798e-05	0.00043457	3.1518	10992	ILMN_1775939
MBNL3	-0.912407	8.61654	-4.5716	1.02591e-05	0.000437359	3.14454	55796	ILMN_1765184
BIVM	0.275797	7.57153	4.57125	1.02739e-05	0.000437396	3.14319	54841	ILMN_1805826
RNF216	-0.355627	8.46374	-4.56737	1.04416e-05	0.000443708	3.12805	54476	ILMN_1729980
PDK3	0.318445	8.47679	4.56716	1.04505e-05	0.000443708	3.12725	5165	ILMN_1776582
IL18RAP	0.581029	11.3121	4.56414	1.05833e-05	0.000448649	3.11544	8807	ILMN_1721762
XRCC5	-0.288687	9.65024	-4.56386	1.05955e-05	0.000448649	3.11436	7520	ILMN_2105983
TPP1	0.37697	10.6007	4.56181	1.06864e-05	0.000451887	3.10637	1200	ILMN_1729234
CCDC34	0.299722	7.53814	4.55259	1.11046e-05	0.000468937	3.07047	91057	ILMN_1657547
RTBDN	-0.176002	7.02405	-4.55122	1.11679e-05	0.000470976	3.06516	83546	ILMN_1748189
PARP9	0.574215	10.2862	4.55029	1.12114e-05	0.000472177	3.06152	83666	ILMN_1731224
CDC2	0.365713	7.29386	4.54794	1.13212e-05	0.000476161	3.0524	983	ILMN_1710428
MCM2	0.600348	7.97434	4.54401	1.15078e-05	0.00048336	3.03712	4171	ILMN_1681503
PARP2	0.204571	7.17785	4.54085	1.16596e-05	0.00048908	3.02487	10038	ILMN_1757995
GNL3L	-0.545077	8.48552	-4.5397	1.17159e-05	0.000490782	3.02037	54552	ILMN_1708414
WEE1	0.353045	7.69437	4.53927	1.17368e-05	0.000491002	3.0187	7465	ILMN_1778561
KIF2C	0.378261	7.2847	4.53868	1.17653e-05	0.00049154	3.01643	11004	ILMN_1685916
CLIC3	0.764795	9.07889	4.53803	1.17971e-05	0.00049209	3.0139	9022	ILMN_1796423
MTMR10	-0.22234	9.08987	-4.53777	1.18099e-05	0.00049209	3.01289	54893	ILMN_1778734
INVS	0.129928	7.23466	4.53585	1.19045e-05	0.000495374	3.00543	27130	ILMN_1683766
EIF2C2	-0.69581	9.4335	-4.53349	1.20218e-05	0.000499588	2.99627	27161	ILMN_1695719
FKBP5	0.622592	10.8614	4.53282	1.20549e-05	0.000500302	2.9937	2289	ILMN_1778444
GALM	0.530552	8.57061	4.53235	1.20784e-05	0.000500615	2.99187	130589	ILMN_1671482
CABC1	-0.368443	9.01278	-4.53091	1.21508e-05	0.000502497	2.98629	56997	ILMN_1731064
CCNF	0.492978	8.38536	4.53081	1.21559e-05	0.000502497	2.9859	899	ILMN_1773119
CLEC4D	0.720215	8.35008	4.52837	1.22794e-05	0.000506676	2.97645	338339	ILMN_1808979
LOC650795	-0.299675	7.57093	-4.52818	1.22893e-05	0.000506676	2.97569	650795	ILMN_1790771
SLC46A2	-0.334049	7.39922	-4.52652	1.2374e-05	0.000509496	2.96927	57864	ILMN_1707585
LOC100128115	-0.245309	7.38873	-4.52409	1.24992e-05	0.000513977	2.95986	100128115	ILMN_3271081
HNRPA1P4	-0.658646	10.5392	-4.51858	1.27874e-05	0.000524409	2.93855	389674	ILMN_1690586
RYK	-0.243566	7.80071	-4.51841	1.27967e-05	0.000524409	2.93788	6259	ILMN_1658526
SERBP1	-0.254934	9.14538	-4.51829	1.28031e-05	0.000524409	2.93741	26135	ILMN_1773968
FAM62B	-0.379663	11.0226	-4.51731	1.28548e-05	0.00052584	2.93364	57488	ILMN_2057573
LOC391019	-0.554643	9.27235	-4.51651	1.28977e-05	0.000526904	2.93053	391019	ILMN_3286813
KLRF1	-0.48308	7.96891	-4.51379	1.30437e-05	0.000532177	2.92	51348	ILMN_1685521
LMNB2	0.403722	8.71973	4.5121	1.31353e-05	0.000535218	2.91346	84823	ILMN_1708101
SYNJ2BP	-0.43323	7.81499	-4.50522	1.3514e-05	0.000549931	2.88691	55333	ILMN_1697793
PHLDA1	0.229546	7.1181	4.50278	1.36512e-05	0.000554794	2.87747	22822	ILMN_1687978
SLC24A6	-0.357433	9.68401	-4.49734	1.39609e-05	0.000566644	2.85651	80024	ILMN_1701655
DAGLB	-0.362087	9.31794	-4.49552	1.40659e-05	0.000569912	2.8495	221955	ILMN_1658885
PSMD6	0.239653	10.5283	4.49532	1.40777e-05	0.000569912	2.84872	9861	ILMN_1779633
LOC338870	-0.4594	12.3188	-4.49442	1.41299e-05	0.000571284	2.84526	338870	ILMN_3294074
CDC45L	0.601577	7.55416	4.493	1.42129e-05	0.0005739	2.83979	8318	ILMN_1670238
CAPN5	-0.250841	7.26881	-4.4926	1.42368e-05	0.000574124	2.83822	726	ILMN_1737089
AP1G2	0.291346	8.60553	4.49208	1.42673e-05	0.000574618	2.83622	8906	ILMN_1754179
FAM108A3	0.356298	9.15484	4.48831	1.44907e-05	0.000582708	2.82171	653401	ILMN_2239772
CTPS	0.396647	7.80108	4.48806	1.45054e-05	0.000582708	2.82076	1503	ILMN_1783285
DGCR2	-0.313113	8.73929	-4.48719	1.45575e-05	0.000583493	2.81741	9993	ILMN_1713301
NCLN	-0.354682	9.36586	-4.48711	1.45622e-05	0.000583493	2.81711	56926	ILMN_3237632
GDI1	0.383808	8.6372	4.48419	1.47382e-05	0.00058952	2.80588	2664	ILMN_1734153
MAP4K1	0.354185	10.1988	4.484	1.47502e-05	0.00058952	2.80512	11184	ILMN_1665943
BMF	-0.158397	7.12032	-4.48292	1.48159e-05	0.000591392	2.80097	90427	ILMN_1695354
WDR62	0.166284	6.66573	4.48184	1.4882e-05	0.000593274	2.79681	284403	ILMN_1673073
ZDHHC1	-0.338371	7.23629	-4.47749	1.51507e-05	0.000603218	2.7801	29800	ILMN_2094313
ALDH1A1	-0.620469	7.85815	-4.47696	1.51838e-05	0.000603768	2.77806	216	ILMN_1709348
C1orf183	-0.30339	7.15706	-4.47396	1.53721e-05	0.000610479	2.76655	55924	ILMN_1797301
NLRP1	-0.241937	7.35924	-4.46792	1.57583e-05	0.000625026	2.74337	22861	ILMN_1810045
GIPC1	0.279773	7.90132	4.46698	1.58194e-05	0.000626656	2.73976	10755	ILMN_1796177
HSPD1	0.47409	9.93264	4.46485	1.59588e-05	0.000631162	2.73157	3329	ILMN_1766713
SLFN11	0.262955	8.56539	4.46462	1.59734e-05	0.000631162	2.73071	91607	ILMN_1752520
C16orf30	-0.594514	8.75323	-4.46279	1.60943e-05	0.000635138	2.72367	79652	ILMN_1751559
TNFAIP6	0.873717	9.0703	4.46184	1.61566e-05	0.000636792	2.72006	7130	ILMN_1785732
LOC729423	-0.425859	8.39649	-4.45915	1.63361e-05	0.000643061	2.70974	729423	ILMN_3227811
PTK9	-0.233488	6.95688	-4.458	1.64133e-05	0.00064529	2.70534	5756	ILMN_1734510
LOC642726	-0.16193	7.10522	-4.45605	1.65451e-05	0.000648869	2.69788	642726	ILMN_1726701
NDUFV3	-0.19092	7.37834	-4.45604	1.65458e-05	0.000648869	2.69784	4731	ILMN_1765500
AVEN	0.270905	7.07953	4.45419	1.66719e-05	0.000652997	2.69075	57099	ILMN_1710216
AGAP6	-0.333046	7.77935	-4.45318	1.67414e-05	0.000654899	2.68686	414189	ILMN_3239130
GART	0.244777	8.36462	4.44997	1.69626e-05	0.000662726	2.67461	2618	ILMN_1679476
LOC647988	-0.1939	6.97197	-4.44857	1.70603e-05	0.000665712	2.66925	647988	ILMN_3242238
RBBP7	0.382447	8.65496	4.4471	1.7163e-05	0.000668888	2.66364	5931	ILMN_1770053
BAMBI	0.490938	7.4362	4.44615	1.72301e-05	0.00067067	2.66	25805	ILMN_1691410
RHOG	0.253285	12.613	4.4442	1.73682e-05	0.000674907	2.65254	391	ILMN_1739792
GNPTG	-0.327434	9.00032	-4.44401	1.73821e-05	0.000674907	2.6518	84572	ILMN_1764230
VRK3	-0.325329	9.04591	-4.44307	1.74488e-05	0.00067666	2.64822	51231	ILMN_1771697
MAP1LC3A	0.334922	8.28701	4.44227	1.75062e-05	0.000678047	2.64516	84557	ILMN_1711986
MCM4	0.582322	8.13811	4.44167	1.75488e-05	0.000678859	2.64289	4173	ILMN_1737205
TNFRSF10B	-0.306946	8.43034	-4.43849	1.77787e-05	0.00068624	2.63074	8795	ILMN_1699265
BEXL1	-0.360557	8.83098	-4.43843	1.77835e-05	0.00068624	2.63049	56271	ILMN_1773504
P2RY10	-0.281462	8.15347	-4.43442	1.80768e-05	0.000696703	2.61522	27334	ILMN_1784774
SMARCD3	0.360208	7.67377	4.43258	1.82133e-05	0.0007011	2.6082	6604	ILMN_1693244
LOC100129657	-0.540131	8.57022	-4.42813	1.85476e-05	0.000712756	2.59122	100129657	ILMN_3193623
RPS6KA4	-0.29895	8.86408	-4.42784	1.85698e-05	0.000712756	2.5901	8986	ILMN_1756204
AHCTF1	-0.298687	7.74687	-4.42759	1.85882e-05	0.000712756	2.58918	25909	ILMN_1666679
DDA1	0.267911	10.2345	4.42734	1.86071e-05	0.000712756	2.58823	79016	ILMN_1694530
CNOT3	0.381008	7.84836	4.42362	1.88922e-05	0.000722719	2.57404	4849	ILMN_2207393
FEN1	0.475537	8.86287	4.42334	1.89133e-05	0.000722719	2.573	2237	ILMN_1755834
CPA3	-0.336375	7.27118	-4.42238	1.89877e-05	0.000723909	2.56934	1359	ILMN_1766551
LOC729208	-0.604117	9.72417	-4.42234	1.89906e-05	0.000723909	2.56919	729208	ILMN_3304003
LRP3	-0.374491	7.4256	-4.42168	1.90424e-05	0.000724311	2.56665	4037	ILMN_2127605
VEZF1	-0.240071	10.1184	-4.42161	1.90474e-05	0.000724311	2.5664	7716	ILMN_1705310
SSBP2	-0.313249	8.26638	-4.41853	1.92887e-05	0.000732596	2.55466	23635	ILMN_1711608
GSDM1	-0.366745	7.07711	-4.4156	1.95201e-05	0.000739952	2.54353	284110	ILMN_2115974
LOC100130511	0.316619	8.42736	4.41539	1.95364e-05	0.000739952	2.54275	100130511	ILMN_3188124
FBLN5	-0.318253	7.69849	-4.41518	1.95532e-05	0.000739952	2.54195	10516	ILMN_1664176
FAM117B	-0.398862	9.17173	-4.41419	1.96329e-05	0.000742073	2.53815	150864	ILMN_1739942
TMEM170A	0.313798	7.58854	4.40898	2.00533e-05	0.000757049	2.51839	124491	ILMN_2212590
MED22	-0.27483	9.37854	-4.40781	2.01493e-05	0.000759193	2.51393	6837	ILMN_1697218
ZNF317	-0.308041	8.30133	-4.4077	2.01586e-05	0.000759193	2.5135	57693	ILMN_1680347
ZNF32	-0.158663	7.69115	-4.40738	2.01844e-05	0.000759254	2.51231	7580	ILMN_1673112
RHBDF2	0.349605	9.92123	4.40497	2.03838e-05	0.000765834	2.50314	79651	ILMN_1691717
MSRB2	0.582558	10.5193	4.40408	2.04574e-05	0.000767681	2.49977	22921	ILMN_1657977
ESAM	0.54743	8.53296	4.40373	2.04867e-05	0.00076786	2.49844	90952	ILMN_1668092
SLAMF8	0.550877	7.44895	4.4019	2.06395e-05	0.000772662	2.49151	56833	ILMN_1667224
TCTEX1D2	0.346357	7.73933	4.39647	2.11004e-05	0.000788718	2.4709	255758	ILMN_1700955
LOC730004	-0.32807	10.5497	-4.39625	2.11187e-05	0.000788718	2.47009	730004	ILMN_3224860
TTC17	-0.285588	8.26994	-4.39473	2.12495e-05	0.000792641	2.46433	55761	ILMN_1660810
LOC643319	-0.470951	10.2781	-4.39445	2.12744e-05	0.000792641	2.46324	643319	ILMN_1766539
TMEM135	0.195404	7.15967	4.3938	2.13302e-05	0.000793779	2.4608	65084	ILMN_1700202
UNG	0.235969	7.86899	4.3918	2.15043e-05	0.000799307	2.45322	7374	ILMN_1683120
ESD	-0.283524	9.68853	-4.39056	2.16125e-05	0.000802377	2.44854	2098	ILMN_1669818
CLIP1	0.205325	8.0976	4.39011	2.1652e-05	0.00080289	2.44684	6249	ILMN_1684038
MTMR4	0.358622	8.72121	4.38922	2.17307e-05	0.000804859	2.44345	9110	ILMN_1771019
RAB22A	-0.290343	8.82582	-4.38825	2.18161e-05	0.000807067	2.43979	57403	ILMN_1786976
NDRG2	-0.17477	7.16595	-4.38792	2.18459e-05	0.000807189	2.43852	57447	ILMN_1670535
CD47	-0.289999	8.6341	-4.38763	2.18709e-05	0.000807189	2.43745	961	ILMN_1771333
SERPING1	0.919016	8.38905	4.38562	2.20503e-05	0.000812852	2.42983	710	ILMN_1670305
PCBP1	0.192675	13.1598	4.38486	2.21181e-05	0.000814392	2.42697	5093	ILMN_1673215
GAS8	0.303051	6.91671	4.3842	2.21782e-05	0.000815647	2.42444	2622	ILMN_1783798
ACTA2	0.677284	9.09142	4.3832	2.2268e-05	0.000817988	2.42067	59	ILMN_1671703
IFITM1	0.439575	13.279	4.38123	2.24464e-05	0.000823578	2.41323	8519	ILMN_1801246
LOC642161	-0.494205	8.44576	-4.37466	2.30523e-05	0.000843917	2.38839	642161	ILMN_1651403
CRISPLD2	0.648609	9.92066	4.37463	2.30546e-05	0.000843917	2.3883	83716	ILMN_1790689
SETX	-0.488487	8.83504	-4.37348	2.31625e-05	0.000846878	2.38395	23064	ILMN_1763436
STK3	0.385018	7.84643	4.37207	2.32953e-05	0.000850739	2.37862	6788	ILMN_1666453
GARNL4	0.357808	8.72498	4.36991	2.34998e-05	0.000857208	2.37047	23108	ILMN_1666832
SFT2D2	0.191601	7.41506	4.36676	2.38003e-05	0.000867163	2.35862	375035	ILMN_1668378
VPS52	0.214593	8.56617	4.36369	2.40978e-05	0.00087698	2.34704	6293	ILMN_1666632
LOC338758	-0.549251	8.98448	-4.36257	2.42076e-05	0.000879566	2.3428	338758	ILMN_1795835
REC8	0.406284	8.86241	4.36239	2.4225e-05	0.000879566	2.34213	9985	ILMN_1751886
MTHFD1	0.293394	7.34952	4.36173	2.42897e-05	0.000880896	2.33964	4522	ILMN_1785324
RASA2	-0.42619	7.5776	-4.35402	2.50581e-05	0.000907711	2.31061	5922	ILMN_1703688
SULF2	-0.564897	7.84463	-4.35217	2.5246e-05	0.000913464	2.30365	55959	ILMN_1667460
OCM2	-0.156199	6.92081	-4.35054	2.54121e-05	0.000917488	2.29754	4951	ILMN_3240349
TSPYL1	-0.266972	9.24619	-4.35051	2.54158e-05	0.000917488	2.2974	7259	ILMN_1779014
HSPB1	0.874019	11.5998	4.34662	2.58174e-05	0.000930913	2.28279	3315	ILMN_1674236
IDI1	0.454119	8.65018	4.34621	2.58599e-05	0.000931373	2.28126	3422	ILMN_1755075
MAPK1	0.227794	9.43003	4.34463	2.60246e-05	0.000936227	2.27534	5594	ILMN_1706677
MYPOP	0.32034	9.46113	4.34409	2.60813e-05	0.000937191	2.27331	339344	ILMN_1704793
ARHGDIA	0.344601	10.8082	4.34194	2.63082e-05	0.000944263	2.26524	396	ILMN_1734742
RPL14L	-0.356886	12.497	-4.3408	2.64302e-05	0.000947556	2.26093	144581	ILMN_3225591
LOC100130332	-0.42167	7.68362	-4.33781	2.67497e-05	0.000957723	2.24973	100130332	ILMN_3191789
TMUB1	0.370891	9.51336	4.33758	2.67749e-05	0.000957723	2.24885	83590	ILMN_1666050
KCND1	0.31406	7.35977	4.3371	2.6826e-05	0.000958458	2.24708	3750	ILMN_1668586
BFAR	0.377506	8.56111	4.32928	2.76834e-05	0.000986329	2.21776	51283	ILMN_1814808
COPZ1	-0.28189	9.64205	-4.32925	2.76867e-05	0.000986329	2.21765	22818	ILMN_1728535
KIR2DS3	0.38511	7.0715	4.32913	2.77006e-05	0.000986329	2.21719	3808	ILMN_1793525
PRICKLE4	-0.307824	11.1029	-4.32621	2.80277e-05	0.000996845	2.20625	29964	ILMN_1695868
C14orf72	0.255033	7.26734	4.32509	2.81535e-05	0.00100018	2.20208	145200	ILMN_1658628
WBP2	0.430753	12.8796	4.32441	2.82308e-05	0.00100179	2.19952	23558	ILMN_1788604
PIM3	0.350079	8.16968	4.32343	2.8342e-05	0.0010046	2.19586	415116	ILMN_1672034
SPINK2	-0.225421	7.17906	-4.32081	2.86427e-05	0.00101411	2.18603	6691	ILMN_1763516
LOC643035	0.299489	8.34112	4.31586	2.92164e-05	0.00103326	2.16755	643035	ILMN_1720180
NAP1L5	0.194326	7.12572	4.31557	2.92504e-05	0.0010333	2.16647	266812	ILMN_1773307
CXCR5	-0.341061	8.55427	-4.31329	2.9519e-05	0.00104089	2.15796	643	ILMN_2337928
BICD2	-0.368461	8.56151	-4.313	2.95544e-05	0.00104089	2.15684	23299	ILMN_1771268
CYLD	-0.310256	7.85451	-4.31291	2.95651e-05	0.00104089	2.1565	1540	ILMN_1775508
ZNF341	0.338708	7.85222	4.31129	2.97571e-05	0.00104602	2.15048	84905	ILMN_2043728
LOC100128729	-0.645202	7.46978	-4.31112	2.97777e-05	0.00104602	2.14983	100128729	ILMN_3261747
MBP	-0.347964	10.5699	-4.31022	2.9885e-05	0.00104862	2.14648	4155	ILMN_1672660
BRD2	-0.243975	11.175	-4.30755	3.02062e-05	0.0010587	2.13652	6046	ILMN_1758918
NR1H3	0.401676	7.61013	4.30636	3.03508e-05	0.00106258	2.13208	10062	ILMN_1814022
PROS1	0.431009	7.84864	4.30329	3.07258e-05	0.00107451	2.12064	5627	ILMN_1671928
JAK2	0.527669	8.14747	4.30241	3.08345e-05	0.00107711	2.11735	3717	ILMN_1683178
SEPX1	0.273218	12.8905	4.29618	3.16135e-05	0.00110309	2.09412	51734	ILMN_1719661
RP9	-0.287981	9.16598	-4.29519	3.17382e-05	0.00110621	2.09045	6100	ILMN_1687922
KIF4A	0.307197	6.85176	4.29453	3.18222e-05	0.00110791	2.08799	24137	ILMN_1799667
GZMA	0.535348	11.5009	4.29267	3.20598e-05	0.00111494	2.08107	3001	ILMN_1779324
CYTH2	0.346787	7.48278	4.29136	3.22279e-05	0.00111955	2.0762	9266	ILMN_3188106
HGD	-0.193954	7.26749	-4.29096	3.22801e-05	0.00112012	2.07469	3081	ILMN_1737541
PSMC2	0.342914	10.2308	4.2895	3.24681e-05	0.00112539	2.06929	5701	ILMN_1768784
LOC652392	-0.178043	6.98405	-4.2865	3.28594e-05	0.0011377	2.05813	652392	ILMN_1772430
RGS10	-0.411818	10.7075	-4.28563	3.29745e-05	0.00113984	2.05488	6001	ILMN_1668559
PRDM8	0.39073	8.20871	4.28548	3.29941e-05	0.00113984	2.05432	56978	ILMN_1802082
LOC387882	0.454883	9.78099	4.28135	3.35427e-05	0.00115752	2.03897	387882	ILMN_1716382
MTX2	0.198923	7.67834	4.27977	3.37546e-05	0.00116355	2.03311	10651	ILMN_1794046
CTSO	-0.343476	7.51938	-4.27861	3.39104e-05	0.00116764	2.02882	1519	ILMN_1769633
ACSL4	0.240237	7.86832	4.27792	3.40038e-05	0.00116957	2.02626	2182	ILMN_1683598
UTP23	-0.384149	7.56269	-4.27599	3.42676e-05	0.00117629	2.01907	84294	ILMN_1774860
NUCB1	0.381292	12.8027	4.27594	3.42744e-05	0.00117629	2.01889	4924	ILMN_1722634
USP24	-0.288077	9.60048	-4.27541	3.43466e-05	0.00117748	2.01693	23358	ILMN_1684594
TNNC2	-0.371151	7.23329	-4.27389	3.45547e-05	0.00118332	2.01131	7125	ILMN_1693428
C20orf11	-0.29441	9.54562	-4.27138	3.49019e-05	0.0011939	2.002	54994	ILMN_1755909
RPS3	-0.30446	13.3609	-4.26999	3.50968e-05	0.00119926	1.99682	6188	ILMN_1760714
KATNB1	0.282803	8.75416	4.2657	3.5701e-05	0.00121858	1.98093	10300	ILMN_1735735
CCDC15	-0.405563	7.63012	-4.26532	3.57546e-05	0.00121908	1.97954	80071	ILMN_1783676
TRIM47	0.313963	7.07043	4.2623	3.61867e-05	0.00123247	1.96836	91107	ILMN_1712708
SNORD13	-0.577377	8.30224	-4.26149	3.63033e-05	0.0012351	1.96537	692084	ILMN_1892403
BRWD2	-0.277269	7.87409	-4.26094	3.63837e-05	0.00123649	1.96331	55717	ILMN_1662896
SLC4A1AP	0.33643	7.33227	4.2594	3.66065e-05	0.00124272	1.95763	22950	ILMN_1750876
SNX13	0.30343	7.43015	4.25822	3.6779e-05	0.00124722	1.95325	23161	ILMN_1797082
LOC100132345	-0.306015	7.11234	-4.25759	3.68714e-05	0.00124813	1.95092	100132345	ILMN_3247857
POLE3	-0.282975	10.6784	-4.25736	3.69047e-05	0.00124813	1.95008	54107	ILMN_1785198
C9orf140	0.275678	7.24429	4.25702	3.69544e-05	0.00124813	1.94882	89958	ILMN_1702197
LTA	-0.346748	8.61373	-4.25695	3.69651e-05	0.00124813	1.94856	4049	ILMN_1795464
STK39	0.291785	9.05558	4.25382	3.74277e-05	0.00126239	1.93698	27347	ILMN_1791328
FBXL19	0.272759	7.12508	4.25066	3.78997e-05	0.00127693	1.92533	54620	ILMN_1671215
QARS	-0.334513	11.6466	-4.24677	3.849e-05	0.00129543	1.91095	5859	ILMN_1763080
LOC653874	0.345182	7.65232	4.24358	3.89799e-05	0.00130947	1.89918	653874	ILMN_1778543
APBA2BP	0.124413	6.87686	4.24351	3.89908e-05	0.00130947	1.89892	63941	ILMN_2270491
CHCHD2	0.317588	12.1426	4.24155	3.9295e-05	0.00131827	1.89169	51142	ILMN_2191681
LOC731486	-0.412765	7.81486	-4.23957	3.96051e-05	0.00132715	1.88438	731486	ILMN_1656938
CKS2	0.502465	9.04455	4.23931	3.96444e-05	0.00132715	1.88346	1164	ILMN_1756326
RGL1	0.554726	7.99042	4.23896	3.96999e-05	0.0013276	1.88216	23179	ILMN_1654398
RPL13A	-0.378449	13.1486	-4.23693	4.00211e-05	0.00133691	1.87466	23521	ILMN_1713369
CCL3	0.754592	8.15773	4.23603	4.01634e-05	0.00134023	1.87136	6348	ILMN_1671509
C8G	0.187719	6.96419	4.23457	4.03961e-05	0.00134657	1.86599	733	ILMN_1737242
IDH1	0.275079	8.7335	4.23326	4.06072e-05	0.00135216	1.86114	3417	ILMN_1696432
PTPRJ	0.27916	7.55741	4.23262	4.07095e-05	0.00135413	1.8588	5795	ILMN_1731589
TTK	0.283044	7.36941	4.23193	4.08207e-05	0.00135639	1.85627	7272	ILMN_1788166
EPHB6	-0.335799	7.40381	-4.23009	4.11194e-05	0.00136456	1.84948	2051	ILMN_1802646
AMD1	-0.239517	9.13814	-4.22988	4.11537e-05	0.00136456	1.84871	262	ILMN_1667994
RRM2	0.4299	7.30966	4.22712	4.16057e-05	0.00137666	1.83855	6241	ILMN_1678669
XRN1	0.380539	8.32935	4.22711	4.16065e-05	0.00137666	1.83853	54464	ILMN_1809086
ADCK2	-0.314972	8.69284	-4.22537	4.1894e-05	0.00138471	1.83213	90956	ILMN_1663132
AOF2	-0.33537	8.70736	-4.22453	4.20334e-05	0.00138785	1.82904	23028	ILMN_1813840
TMEM71	-0.39916	10.5302	-4.22018	4.27617e-05	0.00141042	1.81307	137835	ILMN_1674402
FAM125B	0.222537	7.285	4.21874	4.30064e-05	0.00141699	1.80776	89853	ILMN_1652525
CHTF8	-0.13051	7.12733	-4.21726	4.32578e-05	0.00142378	1.80234	54921	ILMN_1684341
GOSR1	-0.183602	7.23476	-4.21645	4.33969e-05	0.00142686	1.79936	9527	ILMN_1798816
GSDMB	0.370519	8.29088	4.21509	4.36297e-05	0.00143301	1.79438	55876	ILMN_1666206
CCR7	-0.526017	11.6299	-4.21141	4.42675e-05	0.00145244	1.78089	1236	ILMN_1715131
BAG4	-0.206248	7.39953	-4.21069	4.43948e-05	0.00145509	1.77822	9530	ILMN_1727996
GFPT1	0.21724	7.22749	4.20818	4.48353e-05	0.00146799	1.76905	2673	ILMN_2220184
CDKN1B	-0.264474	9.56479	-4.20751	4.49546e-05	0.00147036	1.76658	1027	ILMN_1722811
LOC221442	0.328199	7.60276	4.20671	4.50968e-05	0.00147325	1.76364	221442	ILMN_1753411
SNX20	0.277479	7.63411	4.20648	4.51369e-05	0.00147325	1.76281	124460	ILMN_1746213
GRB2	-0.304688	9.99818	-4.20587	4.52457e-05	0.00147526	1.76058	2885	ILMN_1742521
BAGE5	-0.260439	7.18438	-4.20521	4.53632e-05	0.00147756	1.75817	85316	ILMN_2206141
RPL35A	-0.253394	13.7587	-4.20375	4.56252e-05	0.00148455	1.75281	6165	ILMN_1756360
C1QL3	-0.115573	6.79693	-4.20344	4.56807e-05	0.00148481	1.75168	389941	ILMN_1776576
IVNS1ABP	0.360117	8.70896	4.20238	4.5872e-05	0.00148948	1.7478	10625	ILMN_1715133
ZBTB42	-0.295034	7.97868	-4.2021	4.59234e-05	0.00148961	1.74676	100128927	ILMN_3239445
PQBP1	-0.263025	8.21319	-4.20162	4.60095e-05	0.00149086	1.74502	10084	ILMN_1692429
RPL22	-0.395455	10.8444	-4.20134	4.606e-05	0.00149095	1.744	6146	ILMN_2079386
UBE2A	0.203327	8.97743	4.20102	4.61188e-05	0.00149132	1.74281	7319	ILMN_1681603
KCNJ2	0.492838	9.39651	4.20048	4.62164e-05	0.00149293	1.74085	3759	ILMN_1780334
RPL23	-0.645114	11.6547	-4.19953	4.63904e-05	0.00149701	1.73735	9349	ILMN_1755115
SPPL3	-0.217892	7.48415	-4.199	4.64878e-05	0.00149861	1.7354	121665	ILMN_1657405
C11orf75	0.619105	10.0622	4.19657	4.69338e-05	0.00151143	1.72653	56935	ILMN_1798270
C1orf59	0.256984	9.73438	4.19324	4.75519e-05	0.00152977	1.71437	113802	ILMN_1682428
NECAP2	-0.284571	10.2494	-4.19248	4.76949e-05	0.00153279	1.71158	55707	ILMN_1749011
PSMD2	0.252628	9.92669	4.18971	4.82163e-05	0.00154796	1.70148	5708	ILMN_1712432
MME	-0.620982	7.99948	-4.18898	4.83553e-05	0.00155083	1.6988	4311	ILMN_1678170
C16orf59	0.279881	6.82977	4.18733	4.8671e-05	0.00155926	1.69276	80178	ILMN_1656452
RAC1	0.242774	9.73476	4.18708	4.87176e-05	0.00155926	1.69187	5879	ILMN_1652445
JOSD2	0.355325	7.37513	4.18599	4.89263e-05	0.00156434	1.6879	126119	ILMN_2169025
LYRM2	-0.39183	8.65543	-4.1846	4.9194e-05	0.0015713	1.68283	57226	ILMN_1703132
EDC4	-0.28284	9.58449	-4.18285	4.95339e-05	0.00158055	1.67643	23644	ILMN_1665212
DPEP2	-0.598562	10.205	-4.18171	4.97558e-05	0.00158601	1.67228	64174	ILMN_1689160
LYAR	0.345362	9.38302	4.18124	4.9848e-05	0.00158628	1.67056	55646	ILMN_1764362
NHSL2	-0.212103	7.46067	-4.18115	4.98656e-05	0.00158628	1.67023	340527	ILMN_1748694
LOC648249	-0.379898	11.4121	-4.17919	5.02503e-05	0.0015969	1.66309	648249	ILMN_1665148
CRELD1	0.186442	7.39131	4.17778	5.05299e-05	0.00160416	1.65793	78987	ILMN_1659541
RPL5	-0.391632	11.9936	-4.17326	5.14322e-05	0.00163115	1.64149	6125	ILMN_2087080
PPM1F	-0.569773	10.469	-4.17227	5.16338e-05	0.00163589	1.63786	9647	ILMN_2059535
NAAA	-0.584704	8.8249	-4.17197	5.16944e-05	0.00163615	1.63677	27163	ILMN_1668605
C18orf56	0.196545	6.80966	4.16855	5.23906e-05	0.00165406	1.62434	494514	ILMN_1796074
SEC31A	-0.303838	8.97325	-4.16828	5.24466e-05	0.00165406	1.62335	22872	ILMN_1691409
EDG4	0.455611	10.1242	4.16818	5.24676e-05	0.00165406	1.62298	9170	ILMN_1662741
RXRA	-0.436122	10.9682	-4.16816	5.24713e-05	0.00165406	1.62291	6256	ILMN_1687315
RAD51AP1	0.252673	7.41478	4.16736	5.26357e-05	0.00165757	1.62001	10635	ILMN_1670353
FAM168B	-0.285747	8.03996	-4.16677	5.27567e-05	0.00165972	1.61788	130074	ILMN_1677122
LOC345041	0.4962	9.38456	4.1663	5.28539e-05	0.00166111	1.61616	345041	ILMN_3204890
LOC158345	-0.40038	12.0958	-4.16497	5.3131e-05	0.00166814	1.61131	158345	ILMN_1685538
ORAOV1	-0.314405	8.146	-4.16363	5.34093e-05	0.0016752	1.60646	220064	ILMN_1762549
CDCA7	0.462191	8.33193	4.163	5.35411e-05	0.00167766	1.60417	83879	ILMN_1737184
LOC100133888	-0.520081	7.44659	-4.16217	5.3715e-05	0.00168142	1.60116	100133888	ILMN_3249006
DNASE2	0.380559	9.2255	4.15964	5.42494e-05	0.00169646	1.59196	1777	ILMN_1796245
LOC400759	0.669599	7.87229	4.15598	5.5031e-05	0.00171918	1.57868	400759	ILMN_1782487
C1orf43	0.236097	9.35252	4.15467	5.53151e-05	0.00172634	1.5739	25912	ILMN_1660602
C17orf62	0.304133	10.452	4.15351	5.55661e-05	0.00173245	1.56969	79415	ILMN_1750401
CEBPD	0.372405	12.2302	4.15279	5.57211e-05	0.00173555	1.56711	1052	ILMN_1782050
SELM	2.06815	9.06615	4.15243	5.57995e-05	0.00173627	1.5658	140606	ILMN_1651429
LOC100130905	-0.372655	7.35911	-4.15144	5.6016e-05	0.00174128	1.56221	100130905	ILMN_3177167
ZC3H12A	0.539818	8.25913	4.15012	5.63068e-05	0.00174858	1.5574	80149	ILMN_1672295
PTPN1	0.355773	10.9886	4.14955	5.6431e-05	0.00174953	1.55535	5770	ILMN_1681591
CD55	0.512346	9.34662	4.14947	5.6449e-05	0.00174953	1.55506	1604	ILMN_1800540
TXN	0.304006	12.0976	4.14635	5.7141e-05	0.00176904	1.54374	7295	ILMN_1680314
TGFBRAP1	-0.374004	7.80041	-4.14612	5.71915e-05	0.00176904	1.54292	9392	ILMN_1696870
LOC644754	0.143444	6.68697	4.1449	5.74658e-05	0.00177577	1.53848	644754	ILMN_3279979
EHBP1L1	0.38284	10.8967	4.1435	5.77788e-05	0.00178368	1.53344	254102	ILMN_3244457
HDGFRP3	0.207528	6.74454	4.14211	5.80935e-05	0.00179164	1.5284	50810	ILMN_1784256
CD3G	-0.562155	9.07686	-4.14159	5.82106e-05	0.00179348	1.52653	917	ILMN_1717197
ZBED2	0.244234	6.72797	4.14075	5.84036e-05	0.00179766	1.52345	79413	ILMN_1651365
CSGALNACT2	0.396472	7.46638	4.13833	5.89554e-05	0.00181286	1.51473	55454	ILMN_1799208
LOC729798	-0.302581	11.9831	-4.13675	5.93201e-05	0.00182113	1.509	729798	ILMN_3226301
FAM160B1	0.264442	8.32305	4.13666	5.93403e-05	0.00182113	1.50868	57700	ILMN_3182275
CNFN	-0.237381	7.51161	-4.13621	5.9445e-05	0.00182192	1.50705	84518	ILMN_1803838
ADAP1	0.364936	8.00287	4.13605	5.94826e-05	0.00182192	1.50646	11033	ILMN_3247424
RPL31	-0.237804	13.424	-4.13384	5.99952e-05	0.00183583	1.4985	6160	ILMN_1754195
MPHOSPH10	-0.28254	8.36637	-4.13259	6.02893e-05	0.00184303	1.49396	10199	ILMN_1652085
TARS	0.405298	8.81881	4.13229	6.03586e-05	0.00184335	1.49289	6897	ILMN_1685480
AQP9	0.277427	12.2333	4.1318	6.04743e-05	0.00184508	1.49111	366	ILMN_1715068
MXD1	0.301339	11.2133	4.13098	6.0669e-05	0.00184859	1.48813	4084	ILMN_2214678
CHD8	-0.45696	10.1704	-4.13071	6.07325e-05	0.00184859	1.48716	57680	ILMN_1806122
RAB2A	0.234861	8.86014	4.13056	6.07663e-05	0.00184859	1.48664	5862	ILMN_1652394
USP11	0.269835	8.60292	4.13031	6.08268e-05	0.00184864	1.48572	8237	ILMN_1664537
CEP192	-0.199278	8.02773	-4.13001	6.08964e-05	0.00184896	1.48466	55125	ILMN_1703754
HDC	-0.457257	7.47014	-4.12955	6.10074e-05	0.00185054	1.48297	3067	ILMN_1792323
SERPINA10	-0.447431	8.71937	-4.1289	6.11602e-05	0.00185298	1.48065	51156	ILMN_1793628
RAB35	-0.246816	9.08983	-4.12871	6.12062e-05	0.00185298	1.47995	11021	ILMN_1812571
WDR51A	0.351157	7.93453	4.12639	6.17618e-05	0.001868	1.47156	25886	ILMN_1780667
LOC728142	-0.154573	7.11283	-4.12549	6.1978e-05	0.00187158	1.46832	728142	ILMN_3218003
XRN2	-0.261491	8.84841	-4.1254	6.19999e-05	0.00187158	1.46799	22803	ILMN_1727617
RIF1	0.160179	7.06149	4.12375	6.23985e-05	0.0018818	1.46205	55183	ILMN_1755758
TMEM216	-0.281554	9.07167	-4.11972	6.33821e-05	0.00190963	1.44753	51259	ILMN_1732577
MIIP	0.410303	7.99941	4.11778	6.38627e-05	0.00192226	1.44052	60672	ILMN_1783843
LOC100128191	0.1127	6.92727	4.11656	6.41666e-05	0.00192902	1.43612	100128191	ILMN_3176746
SLC16A3	0.436346	11.1408	4.11638	6.42105e-05	0.00192902	1.43548	9123	ILMN_2364022
RPS4X	-0.478095	12.8147	-4.11586	6.434e-05	0.00193106	1.43362	6191	ILMN_1810577
LOC650152	0.18439	13.175	4.11557	6.44121e-05	0.00193138	1.43258	650152	ILMN_1660775
SH2D3C	0.27174	9.03292	4.11063	6.5659e-05	0.00196688	1.41479	10044	ILMN_1674440
DPF2	-0.200641	9.95926	-4.10916	6.60349e-05	0.00197625	1.40949	5977	ILMN_1734317
KIAA1210	2.32519	8.71472	4.10747	6.64687e-05	0.00198704	1.40342	57481	ILMN_1732962
GPR162	-0.385214	7.74343	-4.10726	6.65221e-05	0.00198704	1.40267	27239	ILMN_1686095
JUN	0.582889	8.55136	4.10648	6.67256e-05	0.00199122	1.39984	3725	ILMN_1806023
MCTP2	0.351808	7.47054	4.10531	6.70287e-05	0.00199836	1.39564	55784	ILMN_1792682
CD177	0.886416	7.59912	4.104	6.73678e-05	0.00200517	1.39095	57126	ILMN_1774071
CEL	0.303228	7.23413	4.10394	6.73852e-05	0.00200517	1.39071	1056	ILMN_1723418
SEPHS2	0.342854	9.3333	4.1031	6.76033e-05	0.00200976	1.38772	22928	ILMN_1687824
C1orf91	0.158381	7.35638	4.10259	6.77372e-05	0.00201183	1.38588	56063	ILMN_1673752
RCE1	0.208463	7.65253	4.10185	6.79311e-05	0.00201567	1.38323	9986	ILMN_1685002
FCER2	-0.481841	8.23057	-4.0995	6.85522e-05	0.00203218	1.37479	2208	ILMN_1662451
EMR3	-0.557082	8.04931	-4.09903	6.86769e-05	0.00203395	1.3731	84658	ILMN_1755873
LOC100129890	-0.240589	7.63949	-4.09814	6.89155e-05	0.00203909	1.36989	100129890	ILMN_3270411
LOC100130070	-0.553015	10.0369	-4.09765	6.90468e-05	0.00203966	1.36812	100130070	ILMN_3264073
LOC644162	-0.595167	8.52435	-4.09758	6.90648e-05	0.00203966	1.36788	644162	ILMN_1691402
WARS	0.800465	11.7793	4.09431	6.99442e-05	0.00206368	1.35614	7453	ILMN_1727271
PIAS4	-0.386476	9.66518	-4.0936	7.01372e-05	0.00206743	1.35359	51588	ILMN_1802905
LOC728873	-0.456401	12.2771	-4.09276	7.03649e-05	0.00207219	1.35058	728873	ILMN_3298582
LOC728178	0.149552	6.95203	4.09016	7.1074e-05	0.00209111	1.34128	728178	ILMN_3277072
SIRT2	0.231489	7.84099	4.08951	7.12523e-05	0.00209439	1.33896	22933	ILMN_1723494
LOC728640	-0.314554	8.0934	-4.08897	7.14037e-05	0.00209687	1.33699	728640	ILMN_3225406
RBM18	0.218238	7.75038	4.08816	7.16262e-05	0.00210144	1.33411	92400	ILMN_1802355
GTF3C1	0.354906	8.16722	4.08705	7.19353e-05	0.00210853	1.33012	2975	ILMN_1789839
HEATR5B	-0.197151	8.8883	-4.08508	7.24841e-05	0.00212263	1.32307	54497	ILMN_1810805
LOC729102	-0.485212	11.6397	-4.08326	7.29945e-05	0.00213558	1.31656	729102	ILMN_3304022
FBL	-0.437522	10.4783	-4.08183	7.33982e-05	0.00214539	1.31145	2091	ILMN_1719205
CBX3	-0.360109	8.36344	-4.08013	7.38813e-05	0.0021575	1.30537	11335	ILMN_1774086
RNF20	0.312896	8.92376	4.07983	7.3968e-05	0.00215802	1.30428	56254	ILMN_1710758
RPA1	-0.257204	9.62176	-4.07926	7.41295e-05	0.00216072	1.30226	6117	ILMN_1795719
C17orf53	0.285009	7.40473	4.07871	7.4289e-05	0.00216336	1.30026	78995	ILMN_1776490
ATG3	0.309088	9.96401	4.07709	7.47519e-05	0.00217409	1.29451	64422	ILMN_1769566
LOC647436	-0.399135	8.10123	-4.07694	7.47964e-05	0.00217409	1.29395	647436	ILMN_1772998
RBBP8	0.221817	7.4459	4.07653	7.4914e-05	0.00217549	1.2925	5932	ILMN_1678695
MXD4	-0.348742	10.6368	-4.07299	7.59431e-05	0.00220039	1.27985	10608	ILMN_1756541
FES	0.442892	10.3769	4.07294	7.5959e-05	0.00220039	1.27966	2242	ILMN_1693650
UBE2T	0.377032	7.91074	4.07286	7.59822e-05	0.00220039	1.27937	29089	ILMN_1711470
PCYOX1	-0.261042	7.98291	-4.07222	7.6171e-05	0.00220382	1.27707	51449	ILMN_1679725
C6orf204	-0.277027	7.08465	-4.0719	7.62643e-05	0.00220449	1.27594	387119	ILMN_1793559
OXA1L	-0.298529	10.1053	-4.07078	7.65933e-05	0.00221196	1.27195	5018	ILMN_1731851
ESPL1	0.189574	7.05056	4.06908	7.70969e-05	0.00222445	1.26587	9700	ILMN_1742145
CHST13	-0.605583	8.19381	-4.06516	7.82693e-05	0.0022562	1.25188	166012	ILMN_1734707
NACC1	0.19376	7.1903	4.06368	7.87169e-05	0.00226702	1.2466	112939	ILMN_1658231
IKBIP	-0.270188	7.54878	-4.06265	7.90281e-05	0.00227389	1.24294	121457	ILMN_1701402
PYGL	0.378921	10.3406	4.05515	8.1341e-05	0.00233706	1.21621	5836	ILMN_1696187
MGC87895	-0.443895	10.7368	-4.05505	8.13728e-05	0.00233706	1.21585	644068	ILMN_3225761
RNF8	0.139256	7.23073	4.05435	8.15902e-05	0.00234116	1.21338	9025	ILMN_1672178
MIR10B	-0.148542	6.77684	-4.05389	8.17345e-05	0.0023428	1.21174	406903	ILMN_3309484
LOC388339	-0.384149	11.6057	-4.05369	8.17967e-05	0.0023428	1.21103	388339	ILMN_3279675
ARAP3	-0.408786	9.01668	-4.05302	8.20076e-05	0.00234669	1.20865	64411	ILMN_1812618
RXRB	-0.290746	9.74303	-4.051	8.2646e-05	0.0023628	1.20146	6257	ILMN_1774074
GAS6	0.41042	7.70265	4.05041	8.28357e-05	0.00236607	1.19934	2621	ILMN_1768260
ACTR10	0.243977	9.49464	4.04542	8.44359e-05	0.00240958	1.18161	55860	ILMN_1798254
C16orf53	-0.232616	8.92544	-4.04298	8.52277e-05	0.00242996	1.17297	79447	ILMN_1727444
BTBD6	0.320809	9.471	4.04171	8.5646e-05	0.00243966	1.16843	90135	ILMN_1744725
LOC642956	0.392262	7.70653	4.04106	8.58576e-05	0.0024421	1.16615	642956	ILMN_3210741
FLJ45337	-0.384669	7.83133	-4.04097	8.58875e-05	0.0024421	1.16582	400754	ILMN_1680388
STAT1	0.582134	11.4113	4.03562	8.76664e-05	0.00249042	1.14683	6772	ILMN_1690105
MYOF	0.719406	8.64845	4.03489	8.79124e-05	0.00249515	1.14424	26509	ILMN_3302919
IRF2BP2	-0.314782	8.58585	-4.03425	8.81284e-05	0.00249679	1.14196	359948	ILMN_1671005
EMR4	-0.140296	6.93018	-4.03395	8.82275e-05	0.00249679	1.14092	326342	ILMN_1685010
RPS6KC1	0.136386	7.41427	4.03385	8.82642e-05	0.00249679	1.14054	26750	ILMN_1661000
DNAJC5	0.258813	8.21539	4.0337	8.83129e-05	0.00249679	1.14003	80331	ILMN_1789642
IER5L	-0.22097	7.01491	-4.03354	8.83686e-05	0.00249679	1.13944	389792	ILMN_1755620
MGAT4A	-0.23367	7.70481	-4.03328	8.84543e-05	0.00249696	1.13855	11320	ILMN_1755643
ARID3A	0.257734	9.93962	4.03043	8.94253e-05	0.00252059	1.12844	1820	ILMN_1670130
GNS	0.273552	12.3144	4.03035	8.94523e-05	0.00252059	1.12816	2799	ILMN_1744517
CEP152	0.151673	7.12314	4.02915	8.98652e-05	0.00252995	1.12389	22995	ILMN_1686458
CDC14A	-0.117902	7.07613	-4.02704	9.0591e-05	0.0025481	1.11644	8556	ILMN_1655983
PTDSS2	0.32205	7.6286	4.02645	9.0795e-05	0.00255154	1.11436	81490	ILMN_1763723
CABLES2	0.249054	7.23224	4.02484	9.13562e-05	0.00256501	1.10865	81928	ILMN_1762407
KIR2DS5	0.58517	7.89076	4.02438	9.15186e-05	0.00256727	1.10701	3810	ILMN_1691803
SCLY	0.231838	7.23513	4.02346	9.18413e-05	0.00257402	1.10375	51540	ILMN_1722742
SOD1	0.328804	12.1986	4.02292	9.20284e-05	0.00257696	1.10186	6647	ILMN_1662438
TOMM6	-0.258152	11.1312	-4.02238	9.222e-05	0.00257825	1.09994	100188893	ILMN_3235113
ISOC1	0.332436	8.02159	4.02233	9.22392e-05	0.00257825	1.09975	51015	ILMN_1764861
SIGLEC5	0.435062	7.85152	4.02201	9.23496e-05	0.00257904	1.09864	8778	ILMN_1652381
TADA3	0.207327	8.73758	4.02171	9.2455e-05	0.00257968	1.09758	10474	ILMN_1674866
AGAP8	-0.387283	8.41906	-4.02081	9.27731e-05	0.00258626	1.0944	728404	ILMN_3242883
LOC645726	0.186825	7.09965	4.02024	9.29757e-05	0.0025896	1.09238	645726	ILMN_3276822
LOC642250	-0.241006	12.7563	-4.01861	9.35579e-05	0.00260252	1.0866	642250	ILMN_1663416
ASCC2	-0.843809	12.0678	-4.01847	9.36057e-05	0.00260252	1.08613	84164	ILMN_1679919
DOCK2	-0.26321	11.3994	-4.01771	9.3879e-05	0.00260781	1.08343	1794	ILMN_1799725
ATP6V1C1	0.301605	7.37905	4.01745	9.39734e-05	0.00260811	1.0825	528	ILMN_1659801
CIRBP	-0.446701	11.3504	-4.01426	9.5123e-05	0.00263769	1.07124	1153	ILMN_1674661
SORL1	-0.362673	10.9607	-4.01373	9.53164e-05	0.00264071	1.06936	6653	ILMN_1759818
ATP5G2	-0.282445	10.6342	-4.01224	9.58586e-05	0.00265339	1.06411	517	ILMN_1660577
EIF3E	-0.304267	12.3399	-4.01179	9.60245e-05	0.00265563	1.06251	3646	ILMN_1739257
PFDN5	-0.296278	12.4484	-4.00547	9.83638e-05	0.00271793	1.04023	5204	ILMN_1755536
GGA2	-0.309319	8.82535	-4.00502	9.85337e-05	0.00272022	1.03863	23062	ILMN_1686152
SQRDL	0.428714	8.78655	4.00355	9.90849e-05	0.00273303	1.03347	58472	ILMN_1667199
EEF2K	-0.238348	7.90994	-4.00269	9.94103e-05	0.00273636	1.03044	29904	ILMN_1789171
MPPE1	-0.430414	9.13083	-4.00235	9.95381e-05	0.00273636	1.02925	65258	ILMN_1667744
ITM2B	0.347323	12.0855	4.0023	9.95568e-05	0.00273636	1.02907	9445	ILMN_1751708
C1orf71	-0.407238	9.73548	-4.00228	9.95642e-05	0.00273636	1.029	163882	ILMN_1670263
APRT	-0.389595	10.0006	-4.00166	9.97995e-05	0.00273636	1.02682	353	ILMN_1722491
OBFC2B	0.34821	7.72854	4.00142	9.98942e-05	0.00273636	1.02594	79035	ILMN_1704672
RNU4ATAC	0.153574	6.92382	4.00125	9.99583e-05	0.00273636	1.02535	100151683	ILMN_3240594
MCM6	0.396067	9.92886	4.00101	0.000100048	0.00273636	1.02452	4175	ILMN_1798654
NR3C1	-0.151109	7.0982	-4.00093	0.000100078	0.00273636	1.02424	2908	ILMN_1668525
PIF1	0.245835	7.21853	4.00078	0.000100135	0.00273636	1.02372	80119	ILMN_2155272
NFE2L2	0.381306	9.27459	4.0007	0.000100166	0.00273636	1.02343	4780	ILMN_1790909
UBL3	-0.254836	9.2323	-3.99778	0.000101287	0.00276258	1.01313	5412	ILMN_1810729
ALOX5AP	0.330658	12.9482	3.99774	0.000101302	0.00276258	1.01299	241	ILMN_1797875
TNFAIP3	0.565073	9.1408	3.99689	0.000101629	0.00276689	1.01	7128	ILMN_1702691
HSP90AA1	0.620782	11.4756	3.99687	0.000101637	0.00276689	1.00993	3320	ILMN_1687546
KEAP1	0.230469	8.20601	3.99469	0.000102482	0.00278748	1.00227	9817	ILMN_1711787
TBC1D2B	0.252689	9.77864	3.99307	0.000103114	0.00280223	0.996584	23102	ILMN_2064606
C11orf46	-0.333029	7.91829	-3.99274	0.000103243	0.0028033	0.995428	120534	ILMN_1767642
MED29	-0.286172	8.72944	-3.99069	0.000104051	0.00282279	0.988215	55588	ILMN_1728360
SFT2D1	0.254839	10.8653	3.99023	0.000104234	0.00282531	0.986592	113402	ILMN_1734895
FABP5	0.391034	7.79948	3.98992	0.000104357	0.00282554	0.985493	2171	ILMN_1696302
PLEK	0.405291	12.2167	3.98975	0.000104423	0.00282554	0.984915	5341	ILMN_1795762
SAC3D1	0.383324	8.56659	3.98952	0.000104516	0.00282563	0.984088	29901	ILMN_1776674
FAM107B	-0.358157	10.938	-3.98929	0.000104607	0.00282564	0.983285	83641	ILMN_1758672
MYL5	-0.223677	7.46988	-3.98744	0.000105343	0.00284308	0.976795	4636	ILMN_1746948
PHAX	0.192099	7.9479	3.98503	0.000106314	0.00286466	0.968307	51808	ILMN_1728074
METTL7B	0.506147	7.50983	3.985	0.000106325	0.00286466	0.968208	196410	ILMN_2064725
REV1	-0.186967	7.90285	-3.98463	0.000106475	0.00286624	0.966904	51455	ILMN_1707062
SLC43A2	-0.487294	9.44209	-3.98236	0.000107395	0.0028872	0.958947	124935	ILMN_1787127
FOXM1	0.194468	7.28181	3.98225	0.000107438	0.0028872	0.958573	2305	ILMN_1716400
STAG3	0.351936	7.34851	3.98147	0.000107757	0.00289328	0.955833	10734	ILMN_1787275
ZC3H5	-0.297452	9.1369	-3.97924	0.000108671	0.00291533	0.948018	85451	ILMN_1689119
C11orf80	-0.311897	7.53642	-3.97858	0.000108945	0.00292018	0.945689	79703	ILMN_1790637
MT2A	0.706305	11.9585	3.97789	0.000109231	0.00292533	0.943268	4502	ILMN_1686664
LOC644563	0.254577	9.23662	3.97718	0.000109523	0.00293065	0.940796	644563	ILMN_3207122
LOC407835	0.279912	8.67434	3.97683	0.000109669	0.00293195	0.939564	407835	ILMN_1688124
SEMA4B	0.22842	8.69703	3.97659	0.000109771	0.00293195	0.938701	10509	ILMN_1672589
TMEM170B	-0.379141	8.25207	-3.97636	0.000109864	0.00293195	0.937924	100113407	ILMN_3236428
U2AF2	0.228426	9.61682	3.97617	0.000109946	0.00293195	0.937235	11338	ILMN_1768930
FER1L3	0.757028	8.50562	3.97309	0.000111234	0.00296378	0.926461	26509	ILMN_1810289
ABCB7	-0.254163	7.71085	-3.97283	0.000111345	0.00296422	0.925537	22	ILMN_1687840
FAM111A	0.328144	9.62913	3.97166	0.000111837	0.00297478	0.921461	63901	ILMN_1778845
IL23A	-0.261407	7.37442	-3.97091	0.000112158	0.00298079	0.91881	51561	ILMN_1715603
OAZ2	-0.55876	9.34166	-3.96831	0.000113264	0.00300622	0.909729	4947	ILMN_3239460
S1PR5	0.544751	8.96665	3.96821	0.000113306	0.00300622	0.909386	53637	ILMN_2073184
MEGF6	-0.295998	7.36909	-3.96574	0.000114371	0.0030319	0.900738	1953	ILMN_3241441
OSBPL7	0.296351	7.98151	3.96415	0.000115062	0.00304764	0.895168	114881	ILMN_1720865
RFX5	0.258617	8.89386	3.9635	0.000115343	0.0030525	0.892913	5993	ILMN_1741200
IL11	-0.196901	6.84263	-3.96156	0.000116196	0.00307247	0.886101	3589	ILMN_1788107
PPIG	-0.28141	7.8158	-3.96078	0.000116536	0.00307886	0.883402	9360	ILMN_1807611
NUP214	-0.415921	10.735	-3.95924	0.000117218	0.00309428	0.878001	8021	ILMN_1666049
EIF2A	-0.325868	9.48849	-3.95816	0.000117695	0.00310425	0.874248	83939	ILMN_1733305
ATP6V1B2	0.222213	12.1298	3.95788	0.00011782	0.00310493	0.873269	526	ILMN_1787705
LOC648099	-0.310506	7.62747	-3.9559	0.000118703	0.00312559	0.86636	648099	ILMN_1672687
SLC3A2	0.257179	8.43989	3.95544	0.000118913	0.00312848	0.864729	6520	ILMN_1679041
BMS1	-0.219455	8.67103	-3.95369	0.000119699	0.00314651	0.858641	9790	ILMN_1772713
LOC390671	-0.226452	7.48242	-3.95286	0.000120073	0.0031537	0.855754	390671	ILMN_3285753
PADI4	0.556834	11.5508	3.95235	0.000120306	0.00315718	0.85396	23569	ILMN_1807529
LOC641814	-0.282307	13.3829	-3.94902	0.000121824	0.00319435	0.842368	641814	ILMN_3243297
ZWINT	0.226092	7.01277	3.94582	0.000123305	0.00323046	0.831205	11130	ILMN_1653209
KIAA2010	-0.195778	8.77981	-3.94466	0.000123843	0.00324186	0.827176	55671	ILMN_1678097
DUSP5	0.532319	9.43098	3.9441	0.000124105	0.00324507	0.825221	1847	ILMN_1656501
LOC731878	0.249543	8.6165	3.94396	0.000124173	0.00324507	0.824716	731878	ILMN_1791827
SATB1	-0.301121	7.73918	-3.94369	0.000124299	0.00324566	0.823778	6304	ILMN_1690646
LOC151162	-0.311482	9.98031	-3.94313	0.000124562	0.00324982	0.821825	151162	ILMN_3238058
STRADB	-1.22159	11.4104	-3.94162	0.000125273	0.00326512	0.816566	55437	ILMN_1701386
LOC647971	-0.214919	6.98363	-3.94144	0.000125357	0.00326512	0.815945	647971	ILMN_1786936
LOC401640	-0.339169	7.85214	-3.93935	0.000126346	0.00328815	0.808682	401640	ILMN_3290385
NBPF20	-0.91615	9.36515	-3.93874	0.000126638	0.003293	0.806552	400818	ILMN_1800414
RNF175	-0.242576	7.31356	-3.9382	0.000126892	0.00329688	0.804698	285533	ILMN_1741281
PACSIN2	-0.2667	10.2755	-3.93555	0.000128166	0.00332671	0.795469	11252	ILMN_1702396
EBI2	-0.404892	8.97855	-3.93537	0.000128253	0.00332671	0.794843	1880	ILMN_1798706
C1GALT1C1	0.268553	8.11597	3.93421	0.000128814	0.00333851	0.790806	29071	ILMN_1751234
UBN2	-0.219402	7.39185	-3.93369	0.000129067	0.00334115	0.788991	254048	ILMN_1685855
KIAA1618	0.396688	8.00062	3.93356	0.000129129	0.00334115	0.788548	57714	ILMN_1674891
PRSS33	-0.616707	6.93774	-3.93291	0.000129443	0.0033465	0.786309	260429	ILMN_1736831
WDR74	-0.210802	8.3174	-3.93246	0.000129663	0.00334942	0.784739	54663	ILMN_1789775
TMEM14C	-0.384764	10.2391	-3.93112	0.000130318	0.00336358	0.780081	51522	ILMN_1657857
RTN4	0.24724	9.2119	3.93061	0.000130567	0.00336714	0.778316	57142	ILMN_1693598
LOC401433	-0.122219	6.83942	-3.9304	0.000130671	0.00336714	0.777582	401433	ILMN_3207086
CCDC8	-0.175728	6.59005	-3.9299	0.000130918	0.00337073	0.775839	83987	ILMN_1760314
SETBP1	0.235461	8.21494	3.9296	0.000131064	0.00337174	0.774803	26040	ILMN_1720513
TNPO1	-0.168583	7.8766	-3.92751	0.000132096	0.00339456	0.767559	3842	ILMN_1699820
BOLA3	0.283647	8.83936	3.92721	0.000132247	0.00339456	0.766503	388962	ILMN_1786658
FPR2	0.348688	9.98235	3.92715	0.000132277	0.00339456	0.766298	2358	ILMN_1740875
RPL30	-0.237792	13.9536	-3.92397	0.000133867	0.00343256	0.755255	6156	ILMN_1754303
STRAP	0.235644	9.7932	3.92294	0.000134385	0.00344156	0.751689	11171	ILMN_1731194
PILRB	0.290598	7.92887	3.92283	0.000134437	0.00344156	0.751328	29990	ILMN_1685534
PRICKLE1	-0.295501	7.81763	-3.92244	0.000134635	0.00344379	0.749974	144165	ILMN_1741356
MAD2L1	0.247702	7.44396	3.92096	0.000135388	0.00346023	0.74482	4085	ILMN_1777564
LOC727818	-0.248417	7.24572	-3.92018	0.000135783	0.0034675	0.742127	727818	ILMN_3239188
VSTM1	-0.629561	8.15345	-3.91995	0.0001359	0.00346767	0.741331	284415	ILMN_1763455
GLTSCR1	-0.272788	8.59497	-3.9184	0.000136692	0.00348505	0.735961	29998	ILMN_1782829
RHOQ	-0.307965	9.42633	-3.91734	0.000137235	0.00349356	0.732301	23433	ILMN_1810559
CHCHD8	-0.236772	7.64476	-3.91711	0.000137355	0.00349356	0.731493	51287	ILMN_1732750
CCR1	-0.604457	9.18404	-3.9171	0.000137361	0.00349356	0.731457	1230	ILMN_1678833
MT1E	0.521948	8.443	3.91621	0.000137821	0.00350242	0.728365	4493	ILMN_1718968
CASP7	0.309214	7.45061	3.915	0.000138448	0.00351551	0.724173	840	ILMN_1730332
ACSL3	0.192668	8.00098	3.91432	0.000138797	0.00351931	0.721847	2181	ILMN_1654414
BCL11B	-0.36596	9.39514	-3.91427	0.000138823	0.00351931	0.721678	64919	ILMN_1665761
KDELR1	0.267569	9.36699	3.91197	0.000140025	0.00354692	0.713715	10945	ILMN_2130411
GPR177	-0.418628	7.70591	-3.91152	0.000140264	0.00355011	0.712137	79971	ILMN_1660549
IL21R	0.181887	7.51162	3.91042	0.000140841	0.00356141	0.708348	50615	ILMN_1661687
ZNF358	-0.295061	8.2873	-3.91024	0.000140938	0.00356141	0.707711	140467	ILMN_1662340
NFKBIZ	0.374456	9.62015	3.90989	0.00014112	0.00356314	0.706519	64332	ILMN_1719695
NOL9	-0.224789	6.93539	-3.90967	0.000141237	0.00356323	0.705751	79707	ILMN_1761181
IDH3A	-0.234724	8.34366	-3.90734	0.000142473	0.0035915	0.697709	3419	ILMN_1698533
C6orf89	0.266976	7.51093	3.90323	0.00014468	0.00364421	0.683514	221477	ILMN_1665117
LYRM4	-0.245013	7.50268	-3.90233	0.00014517	0.00365268	0.68039	57128	ILMN_1740927
LOC645128	-0.431159	7.49066	-3.90218	0.000145249	0.00365268	0.679887	645128	ILMN_1751814
LOC285908	0.266344	7.58046	3.9017	0.000145512	0.00365636	0.678217	285908	ILMN_1733103
LOC100132992	0.331098	9.37665	3.89919	0.000146885	0.00368791	0.669544	100132992	ILMN_3206475
CD24	-0.629873	9.16453	-3.89737	0.000147887	0.00371008	0.66327	100133941	ILMN_1805519
LOC732432	0.273648	7.79471	3.89674	0.000148234	0.00371582	0.661106	732432	ILMN_3243055
CETP	0.268277	7.41617	3.89576	0.000148777	0.00372487	0.657731	1071	ILMN_1681882
PRPSAP1	0.198255	9.38295	3.89566	0.000148833	0.00372487	0.657382	5635	ILMN_1768449
LOC727758	0.260071	7.76293	3.89393	0.000149796	0.0037436	0.651427	727758	ILMN_3248379
PSAT1	0.348397	7.27858	3.89388	0.000149824	0.0037436	0.651256	29968	ILMN_1692938
LMO4	0.248025	9.2252	3.89368	0.00014994	0.0037436	0.650542	8543	ILMN_1703487
LOC401847	-0.169594	7.18094	-3.89262	0.000150535	0.00375546	0.646887	401847	ILMN_3212126
TMEM154	-0.393375	10.2125	-3.89226	0.000150737	0.00375751	0.645649	201799	ILMN_1683494
ZNF845	-0.220629	7.86248	-3.8908	0.000151558	0.00377498	0.640633	91664	ILMN_3237579
FLJ20273	0.349478	7.9876	3.89035	0.000151812	0.00377831	0.639086	54502	ILMN_1689046
UNC84A	-0.257014	8.07672	-3.88967	0.000152201	0.00378496	0.636729	23353	ILMN_1772316
LOC641849	-0.442388	7.95963	-3.88906	0.000152545	0.00379052	0.634643	641849	ILMN_1745900
VNN2	0.332289	10.962	3.88853	0.000152847	0.00379502	0.632816	8875	ILMN_1678939
MTPN	0.275698	11.1108	3.8872	0.000153608	0.00381089	0.628232	136319	ILMN_1791478
LOC652750	0.265871	7.10218	3.88616	0.000154206	0.00382269	0.624649	652750	ILMN_3247458
DDX6	-0.288187	6.84163	-3.88519	0.000154763	0.00383348	0.621317	1656	ILMN_1777340
RMI1	0.174556	7.6456	3.88408	0.000155405	0.00384635	0.617495	80010	ILMN_1668565
CLDN14	-0.217309	7.87135	-3.87959	0.000158024	0.00390808	0.602073	23562	ILMN_1661194
MRPL20	-0.316342	9.53275	-3.87833	0.000158766	0.0039216	0.59775	55052	ILMN_1693352
CST7	0.602272	10.9394	3.87824	0.000158822	0.0039216	0.597429	8530	ILMN_1679826
VAV2	-0.23977	7.60674	-3.87801	0.000158958	0.00392189	0.596635	7410	ILMN_1794781
WDYHV1	0.176707	7.48521	3.87734	0.000159353	0.00392594	0.594349	55093	ILMN_1695491
P2RX5	0.366092	7.5585	3.87731	0.000159373	0.00392594	0.594231	5026	ILMN_1677793
FAM49B	0.317179	8.76465	3.8765	0.000159854	0.00393377	0.591452	51571	ILMN_1809400
HMOX1	0.635816	8.74516	3.87635	0.000159942	0.00393377	0.590942	3162	ILMN_1800512
HNRNPA0	-0.272139	9.47527	-3.87458	0.000160999	0.00395665	0.584866	10949	ILMN_1753279
C6orf48	-0.3879	10.5391	-3.87257	0.000162206	0.0039824	0.577974	50854	ILMN_1766446
LDLRAP1	-0.398355	8.45973	-3.87242	0.000162301	0.0039824	0.577434	26119	ILMN_1809040
PRR13	0.246212	12.1406	3.87183	0.000162653	0.00398793	0.575431	54458	ILMN_1795944
NAB1	0.247243	7.9773	3.8709	0.000163216	0.00399859	0.572247	4664	ILMN_1774617
TRAFD1	0.481191	9.44345	3.86991	0.00016382	0.00401027	0.568835	10906	ILMN_1758250
FAM98C	-0.240216	7.63924	-3.86939	0.000164134	0.0040148	0.567073	147965	ILMN_1771870
CPD	0.328197	9.08863	3.86794	0.000165024	0.00403253	0.562081	1362	ILMN_1703074
MGC12982	0.177127	7.26963	3.86779	0.000165116	0.00403253	0.561568	84793	ILMN_3309468
LTB	-0.36239	12.3313	-3.86748	0.000165307	0.00403323	0.560498	4050	ILMN_2376204
FAM129A	-0.448169	10.7985	-3.86732	0.000165402	0.00403323	0.559972	116496	ILMN_1810725
APOBEC3H	0.356941	7.21568	3.8653	0.000166651	0.00405787	0.553028	164668	ILMN_1664828
PDCD4	-0.308385	10.5254	-3.86522	0.000166702	0.00405787	0.55275	27250	ILMN_1768004
SNRPN	-0.254014	9.41276	-3.86506	0.000166801	0.00405787	0.552202	6638	ILMN_1656537
GCNT7	-0.149979	6.76473	-3.86422	0.000167317	0.00406726	0.549353	140687	ILMN_3249296
DNASE1L3	-0.238796	6.78714	-3.86345	0.0001678	0.00407584	0.546694	1776	ILMN_2049184
COMMD9	-0.275356	9.25208	-3.86032	0.000169759	0.00411995	0.535985	29099	ILMN_1808821
GPR141	0.275886	7.39688	3.86013	0.000169878	0.00411995	0.535337	353345	ILMN_1656818
GTF3C3	0.185535	8.40621	3.85893	0.000170639	0.00413518	0.531218	9330	ILMN_1789508
NBPF8	-0.498347	7.48868	-3.85715	0.000171766	0.00415929	0.525145	728841	ILMN_3221156
LRRFIP2	0.181144	8.25719	3.85616	0.000172395	0.00417129	0.521774	9209	ILMN_1707156
FN3KRP	-0.369293	9.22148	-3.85536	0.000172912	0.00418057	0.519013	79672	ILMN_1652333
RIT1	0.305745	8.46569	3.85361	0.000174036	0.00420451	0.513035	6016	ILMN_1656335
TRIM11	0.253083	8.50089	3.85224	0.000174922	0.00422266	0.508351	81559	ILMN_1718619
DMRT2	1.82318	8.08772	3.85192	0.000175126	0.00422431	0.507281	10655	ILMN_1728183
SLC6A12	0.374013	7.51206	3.85166	0.000175298	0.00422521	0.506375	6539	ILMN_1780831
RAB11FIP1	-0.318333	9.64404	-3.84951	0.0001767	0.00425574	0.499027	80223	ILMN_1656419
POLQ	0.270882	7.52204	3.84889	0.000177106	0.00426224	0.496911	10721	ILMN_1740291
IL24	-0.142098	7.1998	-3.84744	0.000178056	0.00428181	0.49198	11009	ILMN_1725814
ZNF580	0.157347	7.41291	3.84633	0.000178788	0.00429612	0.488196	51157	ILMN_1653310
SDHAF2	-0.287086	10.6682	-3.84457	0.000179961	0.00432098	0.482167	54949	ILMN_3238633
APEX1	-0.305941	10.1476	-3.84388	0.000180418	0.00432864	0.479828	328	ILMN_1661886
SLC23A3	0.182369	6.79916	3.84308	0.000180954	0.0043382	0.477089	151295	ILMN_1788118
UHMK1	-0.339478	7.22765	-3.84141	0.000182073	0.00436167	0.471409	127933	ILMN_2096012
NOL3	0.129176	6.99069	3.83777	0.000184541	0.00441743	0.458994	8996	ILMN_1813925
C22orf29	-0.258874	7.68987	-3.83615	0.00018565	0.00443505	0.453471	79680	ILMN_1759595
RHBDD3	0.222259	7.03025	3.83609	0.00018569	0.00443505	0.453271	25807	ILMN_1815264
OPLAH	0.395157	7.46285	3.83607	0.000185702	0.00443505	0.453214	26873	ILMN_1711030
OSTF1	0.297026	10.7986	3.83517	0.00018632	0.00444641	0.450153	26578	ILMN_1742456
LOC100133583	-0.692397	10.902	-3.83398	0.000187138	0.00446255	0.446111	100133583	ILMN_3214389
ALKBH8	-0.212381	6.90014	-3.83251	0.000188161	0.00448352	0.441089	91801	ILMN_1779190
LOC283663	-0.379965	7.94223	-3.83184	0.000188628	0.00449124	0.438803	283663	ILMN_3236036
CD1C	-0.285108	7.66661	-3.83039	0.000189641	0.00450967	0.433869	911	ILMN_1654210
SMG5	0.301347	8.93628	3.83032	0.00018969	0.00450967	0.433628	23381	ILMN_2126239
PRDM4	-0.219569	9.20304	-3.82996	0.000189936	0.0045121	0.432434	11108	ILMN_1691432
RNF41	-0.169384	7.40733	-3.82755	0.000191633	0.00454896	0.424236	10193	ILMN_1700345
LOC100131787	-0.431154	8.55703	-3.82608	0.000192678	0.00457029	0.419226	100131787	ILMN_3199974
GPR56	0.519374	9.84778	3.82587	0.000192826	0.00457035	0.418517	9289	ILMN_1697228
CD33	-0.392399	8.63872	-3.82559	0.000193025	0.00457161	0.417567	945	ILMN_1747622
RHEB	0.205311	10.2173	3.82389	0.000194238	0.00459688	0.41179	6009	ILMN_1657949
LOC643387	0.203065	7.89675	3.82273	0.00019507	0.0046101	0.407853	643387	ILMN_3200717
HIF1AN	0.20919	8.0465	3.8227	0.000195091	0.0046101	0.407753	55662	ILMN_1681812
LOC346950	-0.315369	7.85964	-3.82146	0.000195988	0.00462781	0.403525	346950	ILMN_1786359
MFNG	-0.281141	10.8581	-3.82113	0.000196225	0.00462991	0.402412	4242	ILMN_1764577
C9orf127	-0.249437	7.28142	-3.82064	0.000196575	0.00463468	0.400771	51754	ILMN_1708029
CRBN	-0.234641	9.26232	-3.81993	0.000197095	0.00464188	0.398336	51185	ILMN_1668582
CD79A	-0.212768	10.5927	-3.81981	0.000197177	0.00464188	0.397954	973	ILMN_1659227
USP42	0.208061	8.22208	3.81957	0.000197353	0.00464253	0.397133	84132	ILMN_1752575
TNKS	0.129022	7.07384	3.81931	0.000197546	0.00464327	0.39623	8658	ILMN_1657891
KIR2DL1	0.518497	7.7873	3.81912	0.00019768	0.00464327	0.395605	3802	ILMN_1678882
PHF17	-0.177522	8.07111	-3.81833	0.000198256	0.00465329	0.392927	79960	ILMN_1655194
SEC14L1	-0.482939	9.49309	-3.81698	0.000199242	0.00467295	0.388353	6397	ILMN_1732575
LPIN1	0.268941	9.79168	3.81505	0.000200662	0.00470262	0.381811	23175	ILMN_1671554
SPRYD3	-0.425073	8.98795	-3.81486	0.000200807	0.00470262	0.381144	84926	ILMN_1788095
GPR172A	0.321157	8.74092	3.81268	0.000202423	0.00473691	0.373762	79581	ILMN_2041577
ARPC5	0.21405	12.1359	3.81231	0.000202699	0.00473939	0.372505	10092	ILMN_1768394
NUAK2	-0.276881	8.94171	-3.81213	0.000202831	0.00473939	0.371904	81788	ILMN_1789793
CPPED1	-0.264528	7.52779	-3.81179	0.000203085	0.0047398	0.370751	55313	ILMN_1662865
CARD17	0.422249	7.48965	3.8117	0.000203151	0.0047398	0.370453	440068	ILMN_1707979
IRX3	0.509931	7.52465	3.81148	0.000203318	0.00474016	0.369695	79191	ILMN_1811468
CABP5	-0.362111	7.63537	-3.81096	0.000203703	0.0047456	0.367953	56344	ILMN_1676973
LOC730187	-0.266904	13.2076	-3.80988	0.000204514	0.00475375	0.364296	730187	ILMN_3296979
SAFB2	0.260208	9.90969	3.80986	0.000204532	0.00475375	0.364213	9667	ILMN_1705679
DTX3	0.227325	7.14682	3.80979	0.000204582	0.00475375	0.36399	196403	ILMN_1658677
ARID1A	-0.185412	9.925	-3.80969	0.00020466	0.00475375	0.363638	8289	ILMN_1734496
LOC645018	-0.297053	8.03521	-3.80931	0.000204948	0.00475428	0.362342	645018	ILMN_1760089
FAM108A2	0.339487	10.4181	3.80926	0.000204986	0.00475428	0.36217	728917	ILMN_3178529
LOC646909	-0.275695	7.35813	-3.80816	0.000205813	0.00476993	0.358462	646909	ILMN_3211302
LOC646849	-0.303485	9.36565	-3.80762	0.00020622	0.00477582	0.356643	646849	ILMN_1692545
NUDT18	0.350569	8.72531	3.80724	0.00020651	0.00477902	0.355346	79873	ILMN_1787885
LRRC20	0.125078	7.21282	3.8064	0.00020715	0.00479029	0.352496	55222	ILMN_1690523
MTG1	0.180182	6.96495	3.80562	0.000207739	0.00480037	0.34988	92170	ILMN_1775328
TOP1MT	-0.291491	7.69636	-3.80438	0.000208694	0.00481888	0.345656	116447	ILMN_1683740
SIRT5	0.191663	7.60682	3.80334	0.00020949	0.0048337	0.342149	23408	ILMN_1683059
MKKS	-0.190636	7.8275	-3.80284	0.000209871	0.00483892	0.340477	8195	ILMN_1703916
LOC729926	-0.41118	10.6323	-3.80248	0.000210152	0.00484184	0.339244	729926	ILMN_3229594
FCHO1	-0.265724	7.73053	-3.80214	0.000210418	0.0048444	0.338081	23149	ILMN_1654571
SFMBT2	-0.259568	7.08437	-3.8014	0.000210984	0.00485386	0.335607	57713	ILMN_1660125
ZXDC	-0.17454	7.389	-3.80097	0.000211321	0.00485805	0.334136	79364	ILMN_1743643
SPIN4	0.180545	7.0181	3.8004	0.000211764	0.00486392	0.332205	139886	ILMN_1684563
ALDH3A2	-0.175874	7.69104	-3.80005	0.000212034	0.00486392	0.331035	224	ILMN_1667564
MRPL33	-0.282352	10.5395	-3.80004	0.000212042	0.00486392	0.331001	9553	ILMN_1706326
SERGEF	-0.201661	8.52874	-3.7988	0.00021301	0.00488257	0.326803	26297	ILMN_1760049
MYO9A	-0.291052	7.6014	-3.79837	0.000213343	0.00488662	0.325365	4649	ILMN_2173919
LOC399942	0.479955	8.95635	3.79775	0.000213832	0.00489423	0.323258	399942	ILMN_1765701
MSL3L1	-0.379636	8.83027	-3.79717	0.000214286	0.00490106	0.321302	10943	ILMN_1713156
BAGE3	-0.155324	6.60038	-3.79692	0.000214481	0.00490192	0.320468	85318	ILMN_2069267
LRDD	0.148184	7.22893	3.7961	0.000215129	0.00491251	0.31769	55367	ILMN_1774358
LOC100129608	-0.278667	7.49655	-3.79594	0.000215257	0.00491251	0.317139	100129608	ILMN_3263007
CBFA2T3	-0.115721	6.98792	-3.7942	0.000216635	0.00494035	0.311265	863	ILMN_1657627
TOMM70A	0.493643	9.73796	3.79328	0.000217361	0.0049533	0.308184	9868	ILMN_1746426
HIST1H1C	0.709494	10.1632	3.79294	0.00021763	0.00495584	0.307044	3006	ILMN_1757406
RAB3GAP2	0.268499	8.80785	3.79272	0.00021781	0.00495632	0.306284	25782	ILMN_3236423
DNAJC18	-0.198686	7.2506	-3.79199	0.000218391	0.00496595	0.303829	202052	ILMN_1688730
LOC645693	-0.326736	8.10609	-3.79116	0.000219057	0.00497747	0.301027	645693	ILMN_3212284
BRD1	-0.223214	8.07132	-3.78787	0.000221712	0.00503262	0.289934	23774	ILMN_1730019
AFF3	-0.175941	7.28113	-3.78776	0.000221805	0.00503262	0.289549	3899	ILMN_1677951
RDH10	0.202795	6.98963	3.78739	0.000222103	0.00503572	0.288314	157506	ILMN_1714335
SERPINA1	0.269354	11.076	3.78636	0.000222942	0.00505109	0.284842	5265	ILMN_1764980
GPR112	-0.166099	7.03968	-3.78615	0.000223116	0.00505138	0.284124	139378	ILMN_2115534
GTF2IRD2P	-0.125896	7.15737	-3.78478	0.000224231	0.00507112	0.279536	401375	ILMN_1746403
STARD3NL	0.332033	8.17144	3.78469	0.000224311	0.00507112	0.279205	83930	ILMN_2228873
SFRS4	0.194691	11.1122	3.78424	0.000224676	0.00507569	0.277711	6429	ILMN_2175075
LOC100129379	-0.58147	11.7369	-3.78394	0.000224922	0.00507759	0.276704	100129379	ILMN_3178252
SPAG6	0.126979	6.95516	3.7834	0.000225367	0.00508294	0.274882	9576	ILMN_1772458
ZBTB40	-0.331565	7.64571	-3.78318	0.000225554	0.00508294	0.27412	9923	ILMN_1784037
DNAJC10	-0.186463	8.07952	-3.78306	0.000225645	0.00508294	0.273747	54431	ILMN_1656486
MT1A	0.608509	11.2282	3.78266	0.000225982	0.00508686	0.272375	4489	ILMN_1691156
LOC391833	-0.464911	11.5296	-3.78239	0.000226207	0.00508827	0.271458	391833	ILMN_3290577
LOC642333	0.270048	9.74373	3.78198	0.000226546	0.00509224	0.270081	642333	ILMN_1696027
CASP5	0.62686	7.89906	3.78163	0.000226836	0.00509512	0.2689	838	ILMN_1722158
BASP1	0.368231	12.5997	3.78089	0.000227443	0.00510509	0.26644	10409	ILMN_1651826
LOC643287	-0.610111	9.64991	-3.77887	0.000229136	0.0051394	0.259615	643287	ILMN_1677906
LOC100133678	-0.63933	11.287	-3.77695	0.000230746	0.00517182	0.25317	100133678	ILMN_3249667
CARS	-0.323329	8.34452	-3.77467	0.000232673	0.00521127	0.245517	833	ILMN_1696066
AHCY	0.409958	9.30113	3.77434	0.000232955	0.00521386	0.244402	191	ILMN_1657862
MYL9	0.470681	7.83169	3.77389	0.000233334	0.00521862	0.242906	10398	ILMN_1675062
LOC100216545	0.145253	6.78961	3.76991	0.000236752	0.0052913	0.229521	100216545	ILMN_3247329
ZBTB17	0.259728	8.62146	3.76961	0.000237013	0.00529335	0.228507	7709	ILMN_1711048
TOP1	0.231835	7.57361	3.76776	0.000238612	0.00532527	0.22232	7150	ILMN_1763419
FBXO7	-0.886219	10.9499	-3.76737	0.000238958	0.00532674	0.22099	25793	ILMN_1667112
CHEK2	0.132885	7.13494	3.76729	0.000239028	0.00532674	0.220718	11200	ILMN_1759585
C12orf41	-0.227554	9.30282	-3.7671	0.000239188	0.00532674	0.220102	54934	ILMN_1713189
HP1BP3	0.236723	7.70086	3.76567	0.000240437	0.00535075	0.215311	50809	ILMN_1701169
LOC392382	-0.142208	6.8742	-3.76541	0.000240666	0.00535205	0.214433	392382	ILMN_3276676
CNNM3	-0.204932	8.12354	-3.76467	0.000241322	0.00536282	0.21193	26505	ILMN_1662328
BAT5	0.223381	9.0095	3.76309	0.000242708	0.00538981	0.206659	7920	ILMN_2152402
PTPN22	0.185492	7.57879	3.76277	0.000242994	0.00539232	0.205579	26191	ILMN_1695640
SPAG5	0.160353	7.03449	3.7621	0.00024359	0.0054017	0.203322	10615	ILMN_2141259
CARD16	0.349112	8.0782	3.76184	0.000243819	0.0054017	0.202457	114769	ILMN_1724474
CTSH	-0.361528	10.4695	-3.76171	0.000243933	0.0054017	0.202028	1512	ILMN_1752451
RPL39	-0.202574	13.283	-3.761	0.000244569	0.00541195	0.199634	6170	ILMN_1737015
ILF3	-0.166883	8.45641	-3.76043	0.000245076	0.00541934	0.197729	3609	ILMN_1669584
PLEKHO2	0.329204	9.32606	3.75892	0.000246422	0.00544216	0.192688	80301	ILMN_1689968
RPS27L	0.281013	9.84407	3.75889	0.000246455	0.00544216	0.192566	51065	ILMN_1712678
HLA-DQA1	-0.625342	10.8816	-3.75746	0.000247743	0.00546675	0.18777	3117	ILMN_1808405
IKZF1	-0.663352	10.1602	-3.75596	0.000249094	0.00549082	0.182768	10320	ILMN_1676575
DGKQ	0.443136	8.47822	3.75586	0.000249184	0.00549082	0.182435	1609	ILMN_1793017
RPS10P3	-0.279558	7.7832	-3.75307	0.000251723	0.00554286	0.17311	158104	ILMN_3225669
SMARCA5	0.193869	7.9095	3.75193	0.000252778	0.00556217	0.169265	8467	ILMN_1713163
FAM131A	-0.26679	8.10022	-3.75162	0.000253061	0.0055645	0.168235	131408	ILMN_1729217
LCN1L1	-0.175763	7.23538	-3.75122	0.000253428	0.00556865	0.166903	286310	ILMN_3245845
SNX22	-0.275722	8.72884	-3.75031	0.000254269	0.00558322	0.163856	79856	ILMN_2080760
PLOD2	0.155609	7.06835	3.74737	0.000256994	0.00563911	0.154051	5352	ILMN_1771599
IRF3	0.272306	8.94968	3.74675	0.000257575	0.0056479	0.151974	3661	ILMN_1765649
KIAA1545	-0.312511	7.88322	-3.74629	0.000258008	0.00565345	0.150428	57666	ILMN_1760305
LOC647647	-0.150798	6.84026	-3.74518	0.000259045	0.00567219	0.146742	647647	ILMN_1811714
LOC154761	0.286027	7.44663	3.7441	0.000260067	0.0056906	0.14312	154761	ILMN_3237627
SGOL1	0.146332	7.19851	3.7439	0.000260253	0.00569069	0.142463	151648	ILMN_1730825
LOC100129982	-0.233424	7.4545	-3.74277	0.000261327	0.0057102	0.138674	100129982	ILMN_3187479
TBPL1	0.33995	9.56129	3.74247	0.000261612	0.00571244	0.137672	9519	ILMN_1708147
SLC15A1	-0.168801	6.54574	-3.73761	0.00026626	0.00580613	0.12148	6564	ILMN_1652857
MRPL10	0.184667	7.76767	3.73747	0.000266399	0.00580613	0.121	124995	ILMN_1695472
TNFRSF10A	-0.301619	7.80642	-3.73741	0.000266459	0.00580613	0.120794	8797	ILMN_1721316
SF1	-0.204998	7.5631	-3.73652	0.000267321	0.00582087	0.117824	7536	ILMN_1712560
PDCL	-0.189179	7.52058	-3.73613	0.000267699	0.00582221	0.116525	5082	ILMN_1694041
VCAM1	0.130565	6.87671	3.73607	0.000267754	0.00582221	0.116336	7412	ILMN_1766955
PSMD7	0.225309	10.0263	3.73418	0.000269596	0.00585819	0.110033	5713	ILMN_1776173
LYRM1	0.303718	9.76544	3.73372	0.000270045	0.00586153	0.108502	57149	ILMN_1749244
PIAS1	-0.195691	9.72282	-3.73364	0.000270124	0.00586153	0.108235	8554	ILMN_1780598
SGTA	0.309958	7.77025	3.73202	0.000271712	0.0058881	0.102844	6449	ILMN_1677800
CDCA8	0.327772	7.55684	3.73188	0.000271852	0.0058881	0.10237	55143	ILMN_1709294
LOC727908	-0.481936	7.21252	-3.7316	0.000272124	0.0058881	0.101451	727908	ILMN_3200362
LOC645159	-0.229472	7.05298	-3.73142	0.000272299	0.0058881	0.100863	645159	ILMN_3237941
LOC730382	-0.292408	7.68561	-3.73135	0.000272369	0.0058881	0.100624	730382	ILMN_3234116
C2orf25	0.340653	10.2215	3.73124	0.000272476	0.0058881	0.100265	27249	ILMN_1810759
COMT	-0.284118	9.43172	-3.72936	0.000274338	0.00592427	0.0940021	1312	ILMN_1730084
C7orf28A	0.146996	7.80261	3.72871	0.000274988	0.00593307	0.0918266	51622	ILMN_1660270
PPIA	-0.268159	7.57723	-3.72857	0.000275124	0.00593307	0.0913725	5478	ILMN_1704529
HSPA2	0.102999	6.78889	3.72627	0.000277428	0.00597862	0.0837095	3306	ILMN_1766499
ELL3	0.230391	7.42289	3.72496	0.000278739	0.00599873	0.0793748	80237	ILMN_1771264
CARD9	-0.523539	8.97953	-3.72496	0.000278743	0.00599873	0.0793608	64170	ILMN_1712532
ZAK	0.227987	7.41962	3.72415	0.000279561	0.0060122	0.0766684	51776	ILMN_1672390
PAPD5	-0.314681	8.84157	-3.72085	0.000282916	0.00608016	0.0657066	64282	ILMN_1710571
LOC100134273	-0.409276	8.92592	-3.72052	0.00028325	0.00608319	0.0646193	100134273	ILMN_3245517
TCEAL4	-0.18866	7.59919	-3.71997	0.000283812	0.00609107	0.0627991	79921	ILMN_1748625
GINS2	0.460223	7.57895	3.71922	0.000284583	0.00610344	0.0603057	51659	ILMN_1809590
RPS6KA5	-0.241243	7.85599	-3.71812	0.000285725	0.00612373	0.0566274	9252	ILMN_1657515
LOC100130818	-0.217368	7.49792	-3.71694	0.00028694	0.00614558	0.0527269	100130818	ILMN_3238353
HIST2H2AB	0.418645	7.29129	3.71623	0.000287675	0.0061571	0.0503772	317772	ILMN_1747589
LOC100132395	-0.309613	7.29594	-3.71589	0.000288026	0.00616041	0.0492565	100132395	ILMN_3235003
RAB5A	0.25655	8.92652	3.71508	0.000288877	0.00617441	0.0465439	5868	ILMN_1805800
YIPF1	0.201678	9.55815	3.7148	0.000289165	0.00617634	0.0456296	54432	ILMN_1803564
LOC100134330	-0.180385	6.95443	-3.71404	0.000289959	0.00618399	0.0431099	100134330	ILMN_3249079
MGC15763	-0.423465	8.21314	-3.71391	0.000290097	0.00618399	0.0426729	92106	ILMN_1764770
FAM100B	0.272067	9.23017	3.71373	0.000290289	0.00618399	0.0420638	283991	ILMN_1775498
USP7	-0.36072	8.63978	-3.7137	0.000290312	0.00618399	0.0419906	7874	ILMN_1729319
FAM98A	0.313388	8.34495	3.71016	0.000294049	0.00625932	0.0302413	25940	ILMN_1735453
BLCAP	-0.29691	8.97926	-3.70978	0.000294447	0.00626354	0.0289983	10904	ILMN_1675612
LOC728098	0.166764	7.75964	3.70915	0.000295126	0.00627372	0.0268827	728098	ILMN_3204729
LZTR1	0.280484	9.81854	3.70863	0.000295674	0.00628112	0.0251771	8216	ILMN_1805161
COQ10A	-0.374058	9.90049	-3.70827	0.000296055	0.00628495	0.0239943	93058	ILMN_1666364
ABHD3	0.408577	8.79445	3.70583	0.000298676	0.0063363	0.0158971	171586	ILMN_1801767
EPSTI1	0.636675	11.2637	3.70532	0.000299227	0.00633997	0.0142046	94240	ILMN_2388547
HK1	0.370303	10.4583	3.70529	0.000299254	0.00633997	0.0141217	3098	ILMN_1755548
YY1	-0.266934	10.142	-3.70497	0.000299596	0.00634294	0.0130714	7528	ILMN_1770892
SSBP4	0.250232	8.56245	3.70433	0.000300297	0.00635348	0.0109263	170463	ILMN_1720137
TGFB1I1	0.219615	7.2162	3.70293	0.000301807	0.00638112	0.00631792	7041	ILMN_1773801
DEPDC1	0.1058	6.74043	3.69897	0.000306145	0.00646847	-0.00678904	55635	ILMN_1802819
MCM7	0.288705	9.46958	3.69799	0.000307227	0.00648696	-0.0100299	4176	ILMN_1663195
RNF149	0.20936	11.2754	3.69714	0.000308164	0.00650236	-0.0128265	284996	ILMN_1665877
LOC644937	-0.394593	8.5988	-3.69671	0.000308641	0.00650547	-0.0142484	644937	ILMN_3283470
LOC644132	0.310258	8.19457	3.69663	0.000308727	0.00650547	-0.0145018	644132	ILMN_3237368
TAF7	0.311553	9.02628	3.69608	0.00030934	0.00651403	-0.0163258	6879	ILMN_1759460
PLOD3	0.284665	8.89761	3.69306	0.000312723	0.00658083	-0.0263125	8985	ILMN_1774836
KPNA2	0.236349	7.56231	3.68828	0.000318134	0.0066902	-0.0420636	3838	ILMN_1708160
BRD7	0.207915	8.9681	3.68807	0.000318377	0.00669084	-0.0427672	29117	ILMN_1696420
PBK	0.187348	6.6873	3.68775	0.000318744	0.00669406	-0.0438248	55872	ILMN_1673673
SRPK2	-0.209624	7.63772	-3.68697	0.000319636	0.00670828	-0.0463887	6733	ILMN_1657451
MYL6B	0.416223	8.65007	3.68676	0.000319878	0.00670887	-0.0470838	140465	ILMN_1713450
ARHGEF18	-0.246488	11.6451	-3.68552	0.00032131	0.00673439	-0.051184	23370	ILMN_1664016
ALDOB	0.213768	7.14398	3.68336	0.000323811	0.00678166	-0.0583033	229	ILMN_1747716
ZNF234	-0.198564	7.30652	-3.68308	0.000324129	0.00678166	-0.0592035	10780	ILMN_1740197
FBXO46	0.214017	8.3858	3.68301	0.000324214	0.00678166	-0.0594462	23403	ILMN_1747119
MESDC1	0.227171	7.2302	3.68197	0.00032542	0.00680234	-0.0628537	59274	ILMN_1781565
CTGLF7	-0.258286	10.2042	-3.68125	0.000326269	0.00681553	-0.0652441	728127	ILMN_3236344
SAPS3	-0.234116	8.99029	-3.68042	0.000327242	0.00683132	-0.06798	55291	ILMN_1732725
SERTAD1	0.258198	9.54857	3.68015	0.000327557	0.00683335	-0.0688634	29950	ILMN_1794017
PIK3CB	0.268791	7.56156	3.67873	0.000329223	0.00686167	-0.0735203	5291	ILMN_1763347
ESRP2	-0.160816	6.79403	-3.67862	0.000329353	0.00686167	-0.0738814	80004	ILMN_1729640
FAM64A	0.212937	6.86158	3.67808	0.000329998	0.00687029	-0.0756779	54478	ILMN_1728972
ITGB1BP1	0.24013	9.09635	3.6779	0.000330205	0.00687029	-0.0762535	9270	ILMN_1665107
RBMS1	0.278047	9.20364	3.6776	0.000330566	0.00687323	-0.0772562	5937	ILMN_1656436
KIAA0355	-0.299542	8.65604	-3.67669	0.00033164	0.00689098	-0.0802324	9710	ILMN_1659845
LPGAT1	0.203645	8.08306	3.67518	0.000333439	0.00692377	-0.0851979	9926	ILMN_1687998
PTGES3	0.400527	9.08003	3.67415	0.000334676	0.00694486	-0.0885971	10728	ILMN_1719749
GAPT	-0.463125	9.92103	-3.67352	0.000335433	0.00695596	-0.0906705	202309	ILMN_1675191
RBM39	-0.468981	8.23067	-3.67333	0.000335663	0.00695613	-0.0913004	9584	ILMN_1696935
NAT15	0.241634	8.80838	3.67311	0.000335919	0.00695684	-0.0919997	79903	ILMN_1813423
PLCB1	-0.106937	6.94282	-3.67222	0.000336994	0.00697449	-0.0949326	23236	ILMN_1708432
CCDC69	0.347321	8.23178	3.67117	0.000338261	0.00699609	-0.0983759	26112	ILMN_1657680
DTL	0.237883	7.02233	3.67073	0.000338792	0.00700244	-0.0998144	51514	ILMN_1779711
PTTG1	0.426809	9.13658	3.66885	0.00034108	0.00704509	-0.105992	9232	ILMN_1753196
RBM12B	-0.36307	7.61666	-3.667	0.000343349	0.00708729	-0.112076	389677	ILMN_1805778
LOC646064	0.302833	7.23878	3.66512	0.00034567	0.00712964	-0.118258	646064	ILMN_1691574
C13orf3	0.165899	6.85366	3.66496	0.000345856	0.00712964	-0.118751	221150	ILMN_1736816
CAT	-0.529907	10.2151	-3.66171	0.000349897	0.00720821	-0.12941	847	ILMN_1651705
C18orf22	-0.180649	7.41173	-3.66055	0.000351357	0.00723353	-0.13323	79863	ILMN_1736130
SNX12	0.150902	6.78488	3.66033	0.000351637	0.00723452	-0.133959	29934	ILMN_1759003
TIMM22	-0.362107	8.93977	-3.65914	0.000353133	0.00726054	-0.137854	29928	ILMN_1706959
LOC100130562	-0.452281	10.8517	-3.65817	0.000354356	0.00728091	-0.141026	100130562	ILMN_3192836
VWA5A	0.187218	7.53526	3.6575	0.000355201	0.0072935	-0.143212	4013	ILMN_1682996
PCBD1	0.253235	7.92397	3.65666	0.000356273	0.00731072	-0.145976	5092	ILMN_1786105
TGM3	-0.327448	7.50933	-3.65316	0.00036074	0.00739753	-0.157405	7053	ILMN_1786847
ZNF26	-0.174562	7.80075	-3.65295	0.000361018	0.0073984	-0.158112	7574	ILMN_1691798
LOC285900	-0.337461	12.6598	-3.65252	0.000361576	0.00740061	-0.159528	285900	ILMN_1657612
GPBAR1	-0.666839	8.97792	-3.6525	0.000361598	0.00740061	-0.159585	151306	ILMN_1727709
LOC100129027	-0.173064	6.78076	-3.65206	0.00036217	0.00740746	-0.161032	100129027	ILMN_3263423
LST1	-0.475832	10.351	-3.65141	0.000363008	0.00741976	-0.163154	7940	ILMN_1688373
RPL36A	0.169395	7.10755	3.64981	0.000365084	0.00745734	-0.168384	6173	ILMN_1781137
BTBD1	0.176233	8.10567	3.64601	0.000370059	0.00755402	-0.180795	53339	ILMN_1691927
ATRN	-0.0858386	7.22094	-3.64513	0.000371212	0.00757262	-0.183648	8455	ILMN_1678541
BTNL8	-0.230279	7.21853	-3.64413	0.000372539	0.00759475	-0.18692	79908	ILMN_1676895
HIST2H2BE	0.538945	10.4739	3.64317	0.000373816	0.00761584	-0.190059	8349	ILMN_1732071
IRAK2	0.413433	8.36487	3.64265	0.000374516	0.00762514	-0.191775	3656	ILMN_1745964
CD53	0.260893	10.9605	3.64132	0.000376282	0.00765611	-0.196087	963	ILMN_1662843
BLOC1S1	0.364777	10.2697	3.63959	0.000378614	0.00769857	-0.201753	2647	ILMN_2157510
PASK	-0.484556	8.61592	-3.63903	0.000379364	0.00770882	-0.203568	23178	ILMN_1667022
RSL24D1	-0.321138	10.4723	-3.63851	0.000380065	0.00771805	-0.20526	51187	ILMN_2175465
C15orf23	0.192549	7.60517	3.63808	0.000380647	0.00772487	-0.206664	90417	ILMN_1652008
ZNF641	-0.377097	7.65362	-3.63737	0.000381609	0.00773938	-0.208977	121274	ILMN_1731666
SAMD14	0.425818	7.322	3.63596	0.00038353	0.00777331	-0.213581	201191	ILMN_1760688
MAML1	-0.138197	7.47733	-3.63485	0.00038504	0.00779887	-0.217183	9794	ILMN_1767813
RBL2	-0.293034	10.5076	-3.63467	0.000385297	0.00779903	-0.217794	5934	ILMN_1756999
ATP5S	-0.251706	7.82143	-3.63391	0.000386335	0.00781498	-0.220259	27109	ILMN_1679188
JAKMIP2	0.16781	6.78893	3.63359	0.000386773	0.0078188	-0.221299	9832	ILMN_1702320
LOC648343	-0.358725	7.71698	-3.63239	0.000388423	0.0078471	-0.225202	648343	ILMN_1690295
CENPF	0.212423	7.25411	3.6303	0.000391321	0.00790054	-0.232014	1063	ILMN_1664516
AIG1	0.269734	7.29868	3.62824	0.000394184	0.00795216	-0.238696	51390	ILMN_1797974
WHAMM	-0.242363	7.49552	-3.6281	0.000394385	0.00795216	-0.239163	123720	ILMN_1763364
ADAM15	-0.220475	8.84641	-3.6279	0.000394664	0.00795267	-0.239812	8751	ILMN_1751500
GUSBL2	-0.170688	7.36713	-3.62543	0.000398143	0.00801495	-0.247856	375513	ILMN_1657288
TRAF3IP2	-0.178694	7.61581	-3.62534	0.000398267	0.00801495	-0.24814	10758	ILMN_1663381
LOC644773	0.146483	6.84841	3.62402	0.000400133	0.00804735	-0.252425	644773	ILMN_1688029
PPFIBP2	-0.335654	8.31111	-3.62335	0.000401089	0.0080614	-0.254612	8495	ILMN_1675656
TNRC6A	-0.211323	7.57051	-3.62189	0.000403164	0.00809595	-0.259341	27327	ILMN_1714622
KLHL29	-0.133562	7.10867	-3.62152	0.000403691	0.00809595	-0.260538	114818	ILMN_3178406
UBXN6	-0.858916	11.0704	-3.62142	0.000403841	0.00809595	-0.260878	80700	ILMN_1658624
RELL2	0.254463	7.854	3.62142	0.000403841	0.00809595	-0.260878	285613	ILMN_1652540
SLC37A1	0.285048	7.96698	3.62112	0.000404271	0.00809937	-0.261853	54020	ILMN_1687495
SNHG3-RCC1	0.262075	7.49576	3.62013	0.000405696	0.00812064	-0.265077	751867	ILMN_1707493
LOC402694	-0.294322	12.4279	-3.62002	0.000405851	0.00812064	-0.265427	402694	ILMN_1738356
PPIL5	0.154593	7.35377	3.61912	0.000407145	0.00814134	-0.268344	122769	ILMN_1715616
PFKFB3	0.451948	10.0226	3.61798	0.000408787	0.00816897	-0.272033	5209	ILMN_1660847
HINT3	-0.347332	8.10551	-3.61772	0.000409168	0.00817137	-0.272886	135114	ILMN_1779076
NKG7	0.45662	12.8539	3.61736	0.000409693	0.00817664	-0.274061	4818	ILMN_1682993
VAMP1	0.255595	7.93067	3.61643	0.000411035	0.0081982	-0.277057	6843	ILMN_1737611
LOC100128731	-0.259315	12.7678	-3.61447	0.000413899	0.00825008	-0.28342	100128731	ILMN_3247452
ZYG11B	-0.239683	9.32011	-3.61368	0.000415061	0.00826798	-0.285988	79699	ILMN_1656676
FLJ23834	-0.163419	6.71563	-3.61329	0.000415631	0.00827406	-0.287244	222256	ILMN_1809817
VPREB1	-0.521399	7.02915	-3.61156	0.000418183	0.00831959	-0.292853	7441	ILMN_1738549
HRAS	0.18895	7.13541	3.61111	0.000418857	0.0083277	-0.294327	3265	ILMN_1699798
C19orf39	0.192883	6.90306	3.61054	0.000419699	0.00833915	-0.296167	126074	ILMN_1707943
DHRS4	-0.327364	9.04269	-3.60935	0.000421463	0.00836468	-0.300008	10901	ILMN_1762666
LOC653972	-0.342537	8.19336	-3.60905	0.000421916	0.00836468	-0.300994	653972	ILMN_1697665
IL1R2	0.786044	9.07272	3.60898	0.000422017	0.00836468	-0.301213	7850	ILMN_1758371
KIDINS220	0.297786	9.08281	3.60896	0.000422051	0.00836468	-0.301287	57498	ILMN_1679232
NDUFV2	0.307926	10.5182	3.60828	0.000423062	0.00837496	-0.303478	4729	ILMN_2086417
SMAD5	-0.173317	7.37976	-3.60825	0.000423105	0.00837496	-0.303571	4090	ILMN_1674551
PIM2	0.327686	10.916	3.60757	0.000424133	0.00839001	-0.305793	11040	ILMN_1748283
LOC389599	-1.11822	10.7546	-3.60718	0.00042471	0.00839612	-0.307039	389599	ILMN_1714765
ACOT9	0.276368	8.68157	3.60644	0.000425822	0.0084128	-0.309434	23597	ILMN_1658995
FAM69A	-0.196822	7.70513	-3.60587	0.000426686	0.00842306	-0.311292	388650	ILMN_1682577
ALPK1	0.311068	8.73425	3.60564	0.000427028	0.00842306	-0.312024	80216	ILMN_2078697
CDCA1	0.166033	6.71215	3.60556	0.000427148	0.00842306	-0.312281	83540	ILMN_1802951
HIBCH	0.314738	8.42746	3.6045	0.000428755	0.00844573	-0.315721	26275	ILMN_1656977
SIGLEC8	-0.241438	6.73207	-3.60429	0.000429075	0.00844573	-0.316405	27181	ILMN_1730295
LRIG2	-0.207418	7.33971	-3.60427	0.000429106	0.00844573	-0.31647	9860	ILMN_1654099
LMF2	0.265643	8.61038	3.60343	0.000430386	0.0084656	-0.319198	91289	ILMN_1716056
LOC730415	-0.393981	11.5269	-3.60301	0.000431012	0.0084726	-0.32053	730415	ILMN_3228688
LOC100128936	-0.34512	11.2666	-3.60193	0.000432665	0.00849105	-0.324036	100128936	ILMN_3267760
AAK1	-0.280784	7.45312	-3.60188	0.000432739	0.00849105	-0.324193	22848	ILMN_1688755
UBE2I	-0.197515	9.58567	-3.60186	0.000432763	0.00849105	-0.324244	7329	ILMN_1662934
ZBTB3	-0.26535	7.60454	-3.60035	0.000435082	0.0085312	-0.329137	79842	ILMN_1689189
ELL2	0.43761	8.17823	3.59692	0.000440378	0.00862965	-0.340218	22936	ILMN_1655930
CD52	-0.315757	12.9469	-3.59632	0.00044132	0.00863972	-0.342174	1043	ILMN_2208903
ZNF721	-0.217903	8.51817	-3.59624	0.000441444	0.00863972	-0.34243	170960	ILMN_1805271
C9orf109	0.266562	7.21661	3.59486	0.000443584	0.00867619	-0.346859	286333	ILMN_1695485
ATG4C	-0.165668	7.71017	-3.59423	0.000444583	0.00868873	-0.348918	84938	ILMN_1700923
MAT2B	0.217845	9.92703	3.5941	0.000444779	0.00868873	-0.349323	27430	ILMN_1673960
LOC727948	-0.170692	7.20689	-3.59325	0.000446118	0.00870945	-0.352074	727948	ILMN_1787823
LOC653344	0.243788	7.41015	3.59264	0.000447073	0.00872266	-0.354032	653344	ILMN_1693836
ASB13	-0.188534	6.87025	-3.5916	0.000448714	0.00874922	-0.357386	79754	ILMN_1654385
RCP9	-0.209776	7.15927	-3.5908	0.000449977	0.0087684	-0.359961	27297	ILMN_1672966
HLA-G	0.395838	9.87357	3.58934	0.000452309	0.00880836	-0.364692	3135	ILMN_1656670
TCL1A	-0.533269	9.26718	-3.58912	0.000452649	0.00880951	-0.365381	8115	ILMN_1788841
CP110	0.280613	8.0766	3.58808	0.000454312	0.00883639	-0.368738	9738	ILMN_1773200
SYTL3	0.400451	8.5491	3.58765	0.000455	0.00884427	-0.370123	94120	ILMN_1720623
LOC100127993	-0.26959	12.618	-3.58723	0.000455681	0.00884911	-0.371491	100127993	ILMN_3262025
LHFPL2	0.457611	8.81656	3.58714	0.000455814	0.00884911	-0.371758	10184	ILMN_1747744
GSTP1	-0.288955	11.5984	-3.58588	0.00045785	0.00888314	-0.375839	2950	ILMN_1679809
TRIM21	0.345081	9.56835	3.58529	0.000458804	0.00889613	-0.377743	6737	ILMN_1678054
VCPIP1	0.288703	8.42234	3.58471	0.00045973	0.00890858	-0.379589	80124	ILMN_1682180
KDELC2	0.240373	7.3204	3.58334	0.000461956	0.00894618	-0.38401	143888	ILMN_1651557
C12orf57	-0.379487	10.9127	-3.58275	0.000462912	0.00895917	-0.385903	113246	ILMN_1812191
BRSK1	0.50486	9.01139	3.58139	0.000465129	0.00899651	-0.390275	84446	ILMN_2185845
LSS	0.192515	7.53477	3.58043	0.000466712	0.00902157	-0.393386	4047	ILMN_1658271
GOLPH3	0.203693	9.68005	3.57828	0.000470244	0.00908423	-0.400285	64083	ILMN_1708841
SERPINB1	0.35025	11.1049	3.57727	0.000471919	0.00911097	-0.403539	1992	ILMN_1679133
ARID4B	-0.492383	8.52447	-3.57709	0.00047222	0.00911117	-0.404123	51742	ILMN_1761334
CCDC65	-0.186222	7.22964	-3.57671	0.000472848	0.00911767	-0.405339	85478	ILMN_2227195
CEBPZ	-0.278829	9.54109	-3.5748	0.000476037	0.00916803	-0.411491	10153	ILMN_1744147
HSH2D	-0.486448	9.44544	-3.57479	0.000476045	0.00916803	-0.411505	84941	ILMN_1788017
LOC648294	-0.273508	12.1395	-3.57364	0.000477976	0.00919956	-0.415209	648294	ILMN_3208056
SOX4	-0.258386	8.04016	-3.57218	0.000480422	0.00923593	-0.41988	6659	ILMN_1815745
LOC728565	-0.39259	8.32675	-3.57216	0.000480455	0.00923593	-0.419943	728565	ILMN_1682288
KLHDC8B	0.467746	7.84844	3.57161	0.00048139	0.00924824	-0.421722	200942	ILMN_1695246
LOC646483	-0.337215	12.1571	-3.57031	0.000483596	0.00928492	-0.425905	646483	ILMN_1673738
SFRS18	0.334423	9.44592	3.56916	0.000485547	0.00931668	-0.429589	25957	ILMN_3224934
EFHD2	0.204546	12.6397	3.56606	0.000490853	0.00941273	-0.439533	79180	ILMN_1761463
LOC642755	-0.248782	9.5369	-3.56577	0.000491346	0.00941641	-0.440451	642755	ILMN_1655244
MYL4	-1.02303	9.83369	-3.56479	0.000493035	0.00943836	-0.443589	4635	ILMN_1684255
GNB2	0.247054	9.00595	3.56476	0.000493094	0.00943836	-0.443698	2783	ILMN_1658928
FBXL10	-0.183392	8.97749	-3.56433	0.000493835	0.00944332	-0.445072	84678	ILMN_1658232
SNAPC4	-0.254797	8.55284	-3.56426	0.000493955	0.00944332	-0.445296	6621	ILMN_1677484
LOC645630	-0.342327	7.7477	-3.56377	0.000494798	0.00945294	-0.446855	645630	ILMN_3288529
PSMD14	0.282523	8.5793	3.56362	0.000495062	0.00945294	-0.447343	10213	ILMN_1737396
IRF1	0.412819	12.4129	3.56301	0.000496124	0.00946321	-0.449303	3659	ILMN_1708375
LACTB	0.304685	8.89579	3.56296	0.000496204	0.00946321	-0.449451	114294	ILMN_1693830
LOC648740	0.2282	7.21182	3.56136	0.000499002	0.00951079	-0.454594	648740	ILMN_3236904
CAMK2G	-0.309423	8.52864	-3.5609	0.000499799	0.00952019	-0.456054	818	ILMN_1809695
S1PR1	-0.351402	8.691	-3.55918	0.000502826	0.00957028	-0.461577	1901	ILMN_3235853
STK40	0.313368	10.1779	3.55889	0.00050333	0.00957028	-0.462492	83931	ILMN_1679311
ZNF644	-0.118149	7.36145	-3.55888	0.000503345	0.00957028	-0.46252	84146	ILMN_1657665
SHKBP1	0.268928	9.26582	3.55853	0.000503969	0.00957632	-0.463652	92799	ILMN_1765493
PHKG2	-0.240533	7.82345	-3.55756	0.000505682	0.00960306	-0.466757	5261	ILMN_1669607
TPD52L2	-0.247633	10.2676	-3.55667	0.000507253	0.00962705	-0.469593	7165	ILMN_1699570
LOC653610	0.346735	7.82624	3.55577	0.00050886	0.0096517	-0.472485	653610	ILMN_1695435
LOC653381	-0.316422	8.59291	-3.55539	0.000509528	0.00965853	-0.473686	653381	ILMN_1692517
TUBB	0.304332	10.6926	3.55438	0.000511344	0.0096871	-0.47694	203068	ILMN_1665583
TMC4	0.288375	7.02781	3.55085	0.000517685	0.00980129	-0.488209	147798	ILMN_1803219
TRPC4AP	0.195637	9.9487	3.55028	0.000518724	0.00981503	-0.490042	26133	ILMN_2402805
LOC100128905	-0.114831	6.84265	-3.54987	0.000519467	0.00982316	-0.491351	100128905	ILMN_3190192
HIST1H4H	0.611111	8.53375	3.5477	0.000523411	0.00988132	-0.498267	8365	ILMN_1751120
LRPPRC	-0.215997	8.40029	-3.54767	0.00052347	0.00988132	-0.498371	10128	ILMN_1662417
CLOCK	-0.266998	7.96671	-3.54766	0.000523489	0.00988132	-0.498403	9575	ILMN_1682399
C1orf19	-0.270544	8.32901	-3.54662	0.000525387	0.00991119	-0.501712	116461	ILMN_1734486
FDXACB1	-0.195889	7.09028	-3.54617	0.000526207	0.00991746	-0.503138	91893	ILMN_3243529
HNRNPD	0.283514	12.0709	3.5461	0.000526353	0.00991746	-0.503391	3184	ILMN_1751368
LOC650276	-0.261182	13.32	-3.54544	0.000527554	0.00993412	-0.505475	650276	ILMN_1687738
TMF1	0.162951	7.36605	3.54455	0.000529201	0.00995915	-0.508325	7110	ILMN_1661142
AIF1	-0.393402	11.1583	-3.54364	0.000530876	0.00998467	-0.511214	199	ILMN_1703538
MARCO	0.444875	7.76235	3.54302	0.000532031	0.00999786	-0.513201	8685	ILMN_1731503
FLJ35776	0.126519	7.1401	3.54292	0.000532215	0.00999786	-0.513517	649446	ILMN_1685640
LOC729617	-0.249491	13.4048	-3.54238	0.000533219	0.0100107	-0.515239	729617	ILMN_3245000
DIMT1L	-0.341815	9.33399	-3.54183	0.00053424	0.0100239	-0.516988	27292	ILMN_1803312
CASP1	0.341689	10.4738	3.54146	0.000534937	0.0100276	-0.518179	834	ILMN_1727762
ST3GAL3	-0.142922	7.31139	-3.54138	0.000535076	0.0100276	-0.518417	6487	ILMN_1699472
LOC641727	-0.21648	7.48162	-3.54104	0.000535727	0.0100338	-0.51953	641727	ILMN_3241118
THAP6	0.192044	7.51513	3.53842	0.00054064	0.0101197	-0.527874	152815	ILMN_1661424
ZWILCH	0.167909	7.31354	3.53764	0.000542115	0.0101413	-0.530363	55055	ILMN_1700378
ZNF467	-0.406873	10.3386	-3.53711	0.000543111	0.0101494	-0.532042	168544	ILMN_1779015
LOC100133224	-0.106554	7.12541	-3.53706	0.0005432	0.0101494	-0.532191	100133224	ILMN_3216382
NUDT16L1	-0.229186	8.99056	-3.53689	0.00054352	0.0101494	-0.532729	84309	ILMN_1735415
RPRD2	-0.221417	8.25906	-3.53516	0.000546806	0.0102047	-0.538238	23248	ILMN_3238889
LIAS	-0.269307	7.77194	-3.53471	0.000547672	0.0102147	-0.539685	11019	ILMN_1736077
GAFA1	-0.09552	6.80265	-3.53406	0.00054891	0.0102317	-0.541747	100131227	ILMN_3211339
SORT1	0.368072	9.25145	3.53358	0.000549834	0.0102429	-0.543286	6272	ILMN_1707077
TMPO	0.132349	6.98229	3.53332	0.000550326	0.0102459	-0.544102	7112	ILMN_1677747
TYW1	-0.200547	7.95049	-3.53314	0.000550661	0.0102461	-0.544658	55253	ILMN_1736135
REPS2	0.215426	7.68517	3.53267	0.000551581	0.0102571	-0.546184	9185	ILMN_1656934
ARSA	0.211878	8.63743	3.5324	0.000552099	0.0102607	-0.547042	410	ILMN_1656477
GPR137B	0.307225	8.18717	3.52987	0.000556965	0.010345	-0.55506	7107	ILMN_2121816
SLC25A36	-0.256047	7.55483	-3.52953	0.000557634	0.0103512	-0.556157	55186	ILMN_1766528
BACH2	-0.200778	7.74585	-3.52698	0.000562603	0.0104373	-0.564264	60468	ILMN_1659943
SH2B3	-0.305649	10.0727	-3.5268	0.00056295	0.0104376	-0.564827	10019	ILMN_1752046
MAN1C1	-0.320033	7.57236	-3.52621	0.000564105	0.0104528	-0.566699	57134	ILMN_1713807
LOC389322	0.240342	8.19977	3.52563	0.000565249	0.0104678	-0.568551	389322	ILMN_3217285
PTS	0.226495	8.05508	3.52538	0.000565737	0.0104706	-0.569338	5805	ILMN_1720322
SNORD113-1	-0.143035	6.89902	-3.52489	0.000566693	0.0104821	-0.570881	767561	ILMN_3309874
FBXO5	0.246233	7.72939	3.52383	0.000568785	0.0105146	-0.574247	26271	ILMN_1710676
NT5C2	0.229337	10.3412	3.52344	0.000569574	0.010523	-0.575514	22978	ILMN_1682165
SNX29	-0.313759	8.46153	-3.52322	0.000569996	0.0105246	-0.576192	92017	ILMN_1659761
AATF	0.221013	9.30434	3.52267	0.000571089	0.0105386	-0.577941	26574	ILMN_1703743
CALCB	-0.141161	6.71039	-3.52241	0.000571611	0.010542	-0.578776	797	ILMN_2109371
DAK	0.192347	7.20839	3.52138	0.000573647	0.0105733	-0.582024	26007	ILMN_1678619
GABPB1	0.155573	7.18963	3.51958	0.000577253	0.0106225	-0.587749	2553	ILMN_3195401
GTF2F2	0.21591	8.86248	3.51947	0.000577469	0.0106225	-0.588089	2963	ILMN_1745798
WDR34	0.242433	7.14907	3.51943	0.000577544	0.0106225	-0.588209	89891	ILMN_1685928
CCM2	-0.258912	10.3365	-3.51937	0.00057767	0.0106225	-0.588408	83605	ILMN_1652198
PDDC1	-0.167578	7.58513	-3.51839	0.000579649	0.0106526	-0.591532	347862	ILMN_1752197
RASA3	-0.248818	8.10757	-3.5174	0.00058164	0.0106829	-0.594664	22821	ILMN_1654586
CD58	0.25889	8.60883	3.51677	0.000582918	0.0107001	-0.596668	965	ILMN_1785268
NECAP1	0.222195	9.0923	3.51538	0.000585736	0.0107456	-0.601074	25977	ILMN_1726359
ARL6IP1	0.28925	10.3236	3.51515	0.0005862	0.0107478	-0.601797	23204	ILMN_1708416
LRRC8A	0.425396	7.80813	3.51485	0.000586805	0.0107526	-0.602739	56262	ILMN_1739840
NDE1	-0.360777	10.1801	-3.5146	0.000587315	0.0107557	-0.603532	54820	ILMN_1739805
PHF21A	0.209519	10.6221	3.51018	0.000596385	0.0109154	-0.617527	51317	ILMN_1699496
PNKD	0.296118	7.87076	3.50883	0.000599184	0.0109602	-0.621803	25953	ILMN_1652161
LOC100132499	-0.608443	9.47368	-3.50696	0.000603078	0.011025	-0.627719	100132499	ILMN_3288268
LOC390354	-0.386269	12.8024	-3.50675	0.000603505	0.0110264	-0.628365	390354	ILMN_1676765
JARID1A	-0.284543	9.87221	-3.50584	0.000605413	0.0110507	-0.631247	5927	ILMN_1786920
MGC16169	0.216201	7.87801	3.5057	0.000605709	0.0110507	-0.631694	93627	ILMN_1769601
PUM2	-0.15953	9.76867	-3.50561	0.000605894	0.0110507	-0.631972	23369	ILMN_1728305
LOC100133627	0.206143	7.19123	3.50469	0.00060783	0.0110796	-0.634886	100133627	ILMN_3245507
USP3	0.205927	10.2307	3.50399	0.000609301	0.0110999	-0.637092	9960	ILMN_1725862
RAP2C	0.232865	8.67889	3.50382	0.000609668	0.0111001	-0.637642	57826	ILMN_1773561
ARHGAP22	-0.142913	6.63423	-3.50349	0.000610366	0.0111064	-0.638686	58504	ILMN_1676361
NUF2	0.115322	6.85073	3.50231	0.000612856	0.0111354	-0.642403	83540	ILMN_1658695
RNPS1	0.174137	9.55952	3.50216	0.000613177	0.0111354	-0.642881	10921	ILMN_1691843
LOC401537	-0.314156	11.5314	-3.50213	0.000613236	0.0111354	-0.642969	401537	ILMN_3219643
UBFD1	0.403968	7.62403	3.50206	0.000613384	0.0111354	-0.643189	56061	ILMN_1700811
KLK2	-0.0855717	6.77726	-3.50125	0.000615098	0.0111601	-0.645737	3817	ILMN_2335583
PEX14	0.259669	7.33197	3.50073	0.000616211	0.0111696	-0.647388	5195	ILMN_1763634
PLEKHG2	0.186711	7.06261	3.50052	0.000616668	0.0111696	-0.648064	64857	ILMN_1657836
SYT11	0.317883	9.8452	3.50051	0.000616694	0.0111696	-0.648103	23208	ILMN_1717934
HPDL	0.148779	6.76508	3.4998	0.000618201	0.0111905	-0.65033	84842	ILMN_1697703
LOC653717	0.128828	6.92827	3.49929	0.000619292	0.0112037	-0.65194	653717	ILMN_1812787
FLJ22536	-0.161694	6.99647	-3.49769	0.000622727	0.0112594	-0.65699	401237	ILMN_3247023
AFAP1L2	0.23499	7.19636	3.49701	0.000624192	0.0112794	-0.659135	84632	ILMN_1730995
E2F3	0.297873	9.21772	3.49529	0.000627911	0.01134	-0.664556	1871	ILMN_1669502
ITPKB	-0.24229	9.16078	-3.4928	0.000633342	0.0114315	-0.672417	3707	ILMN_1700432
ZNF282	0.225038	7.85027	3.4918	0.000635532	0.0114586	-0.675568	8427	ILMN_1668185
LOC646034	-0.158787	7.34536	-3.49178	0.000635574	0.0114586	-0.675628	646034	ILMN_3201614
ERAL1	0.333449	9.14285	3.49142	0.000636355	0.0114661	-0.676748	26284	ILMN_1718706
ELOVL5	0.285949	9.28168	3.4906	0.000638164	0.0114921	-0.679339	60481	ILMN_2174369
LOC646481	-0.137089	6.96559	-3.49006	0.000639352	0.0115043	-0.681036	646481	ILMN_1774802
TMED5	0.283718	9.44457	3.48996	0.000639575	0.0115043	-0.681355	50999	ILMN_1803279
GPSM2	0.224873	7.0721	3.48868	0.000642397	0.0115484	-0.685372	29899	ILMN_2139816
AHSA2	0.362523	8.55722	3.48836	0.000643113	0.0115494	-0.686388	130872	ILMN_1798308
PLTP	0.304759	7.14381	3.48832	0.000643192	0.0115494	-0.6865	5360	ILMN_1711748
VOPP1	0.305143	8.07573	3.48767	0.000644654	0.0115687	-0.688573	81552	ILMN_2226955
C6orf111	0.288929	8.86668	3.48751	0.000645001	0.0115687	-0.689065	25957	ILMN_2161357
LOC643531	-0.251557	13.2701	-3.48657	0.000647095	0.0115996	-0.692021	643531	ILMN_3291098
GSK3A	0.16334	6.97455	3.48606	0.000648232	0.0116133	-0.693623	2931	ILMN_1757569
HNRNPC	-0.211331	8.60682	-3.48448	0.000651778	0.0116702	-0.698602	3183	ILMN_2334587
DNAJC9	0.338348	9.30126	3.48389	0.000653107	0.0116873	-0.700459	23234	ILMN_1799516
FLJ40125	0.268576	7.42579	3.4836	0.000653753	0.0116922	-0.701362	147699	ILMN_1803357
HPRT1	0.243326	9.39556	3.48342	0.000654154	0.0116927	-0.701921	3251	ILMN_1736940
ABCA1	0.550406	9.02381	3.48191	0.000657562	0.0117469	-0.706663	19	ILMN_1766054
SREBF1	0.188181	7.58238	3.47971	0.000662567	0.0118296	-0.713579	6720	ILMN_1663035
CR1	0.259543	8.163	3.47941	0.00066326	0.0118352	-0.714534	1378	ILMN_1731118
C20orf30	-0.184448	10.6884	-3.47867	0.000664949	0.0118586	-0.716853	29058	ILMN_1806312
SPSB3	-0.412549	10.8295	-3.47806	0.000666349	0.0118768	-0.718772	90864	ILMN_1682864
ARHGAP17	-0.222819	9.14979	-3.47788	0.000666767	0.0118775	-0.719344	55114	ILMN_1718610
DARS2	0.212667	7.21833	3.47759	0.000667425	0.0118824	-0.720244	55157	ILMN_1676191
RPS6KB2	-0.293591	9.96499	-3.47615	0.000670742	0.0119347	-0.724766	6199	ILMN_1761175
RP9P	0.14706	7.02408	3.47568	0.000671832	0.0119473	-0.726247	441212	ILMN_3244444
FAM53C	-0.351907	10.094	-3.47457	0.000674399	0.0119862	-0.729726	51307	ILMN_1744508
NCF1	0.491374	12.5947	3.47371	0.000676383	0.0120082	-0.732405	653361	ILMN_1697309
CCDC12	-0.269303	9.9139	-3.47371	0.000676405	0.0120082	-0.732435	151903	ILMN_1725071
CNOT6L	0.151041	7.41164	3.47128	0.000682065	0.0121018	-0.740035	246175	ILMN_1802450
TTC31	0.285005	8.53978	3.47046	0.000683988	0.0121291	-0.742603	64427	ILMN_1696375
MAL	-0.455979	10.6019	-3.47	0.000685081	0.0121416	-0.744058	4118	ILMN_2320330
STYXL1	0.358767	8.93144	3.46974	0.00068569	0.0121436	-0.744868	51657	ILMN_2210729
RBED1	0.292143	8.07719	3.46949	0.000686279	0.0121436	-0.745652	84173	ILMN_1668065
LOC645968	-0.430469	8.10133	-3.46943	0.000686422	0.0121436	-0.745843	645968	ILMN_1695370
ROCK1	0.143174	7.05697	3.46929	0.000686744	0.0121436	-0.74627	6093	ILMN_1739583
LIG1	0.234806	8.35806	3.46895	0.000687554	0.012151	-0.747344	3978	ILMN_1706779
FLJ42957	0.15938	7.05862	3.46849	0.000688628	0.0121566	-0.748768	400077	ILMN_1732143
LOC647597	0.180092	7.422	3.46849	0.000688646	0.0121566	-0.748792	647597	ILMN_3208881
ITPRIP	0.211373	10.1822	3.46677	0.000692718	0.0122216	-0.754168	85450	ILMN_1805192
NCRNA00219	-0.333815	9.62295	-3.46659	0.000693139	0.0122222	-0.754723	114915	ILMN_3244583
DLEC1	-0.0929797	6.92727	-3.46592	0.000694746	0.0122436	-0.756833	9940	ILMN_1690278
XRCC6	-0.238197	10.4113	-3.46469	0.000697685	0.0122885	-0.760683	2547	ILMN_1743097
PARP10	0.3908	9.17588	3.46322	0.000701214	0.0123437	-0.765283	84875	ILMN_1710844
HNRPA1L-2	-0.481633	8.89594	-3.46196	0.000704257	0.0123903	-0.769232	664709	ILMN_2220283
C20orf199	-0.312009	9.83539	-3.46156	0.000705215	0.0124002	-0.770471	441951	ILMN_3188984
TTTY10	-0.160655	6.59442	-3.45989	0.000709265	0.012455	-0.775692	246119	ILMN_2149793
PRKCZ	-0.145972	7.40208	-3.45967	0.00070981	0.012455	-0.776393	5590	ILMN_1662155
NFKBIA	0.38492	12.6049	3.45962	0.000709929	0.012455	-0.776544	4792	ILMN_1773154
DPYSL2	-0.281069	10.5578	-3.45948	0.000710264	0.012455	-0.776975	1808	ILMN_1672503
LOC646200	-0.295215	12.6558	-3.45933	0.000710625	0.012455	-0.777438	646200	ILMN_1732328
LOC645296	-0.215446	13.3022	-3.45929	0.000710718	0.012455	-0.777557	645296	ILMN_3234831
TIFA	0.47872	7.77437	3.4586	0.000712415	0.0124778	-0.779732	92610	ILMN_1686454
LOC442609	-0.204001	7.84038	-3.45624	0.000718201	0.0125721	-0.787105	442609	ILMN_3200018
KIAA0182	-0.224558	8.81082	-3.45568	0.000719566	0.012589	-0.788836	23199	ILMN_1807767
LOC642595	-0.139091	6.9552	-3.45548	0.000720058	0.0125906	-0.789459	642595	ILMN_1652685
BCL2L11	0.220311	7.16813	3.45445	0.000722612	0.0126282	-0.792686	10018	ILMN_1766541
LOC729779	0.213663	7.04901	3.45374	0.000724375	0.0126519	-0.794908	729779	ILMN_3229057
LOC641518	-0.158158	7.15166	-3.45309	0.000725998	0.0126732	-0.796948	641518	ILMN_1702167
CLEC4F	-0.279804	6.93406	-3.45204	0.000728598	0.0127104	-0.800206	165530	ILMN_1723115
CDC20	0.692128	9.18144	3.45191	0.000728937	0.0127104	-0.80063	991	ILMN_1663390
IFITM2	0.21582	14.2028	3.45142	0.000730151	0.0127244	-0.802147	10581	ILMN_1673352
LOC645387	-0.228208	13.032	-3.45103	0.000731121	0.0127343	-0.803357	645387	ILMN_3218820
PPP4C	-0.22228	10.5154	-3.45061	0.000732185	0.0127457	-0.804682	5531	ILMN_3248975
AQP12B	-0.224322	7.19663	-3.45036	0.00073281	0.0127495	-0.805459	653437	ILMN_3246595
ERLIN1	0.389839	7.32963	3.44706	0.000741132	0.0128871	-0.815751	10613	ILMN_1730731
SPCS3	0.384222	8.51524	3.44588	0.000744125	0.012932	-0.819423	60559	ILMN_1667707
LOC648622	-0.39211	12.2232	-3.4446	0.000747391	0.0129816	-0.823414	648622	ILMN_1652955
LOC728440	0.245785	7.60933	3.44387	0.000749237	0.0130064	-0.825662	728440	ILMN_3229210
SYTL4	0.214895	7.07326	3.44305	0.000751364	0.0130357	-0.828245	94121	ILMN_1719599
HLA-DMA	-0.328612	11.6045	-3.4428	0.000751985	0.0130357	-0.828998	3108	ILMN_1695311
LOC400948	-0.23082	12.5203	-3.44273	0.000752173	0.0130357	-0.829225	400948	ILMN_1739335
PECAM1	-0.40472	10.8664	-3.44214	0.000753691	0.0130548	-0.831061	5175	ILMN_1689518
C7orf43	0.242344	8.66926	3.44188	0.000754355	0.0130591	-0.831864	55262	ILMN_1770030
ELP3	-0.212164	9.18813	-3.44099	0.000756648	0.0130848	-0.834629	55140	ILMN_1744068
CD86	-0.398885	8.76668	-3.44098	0.000756673	0.0130848	-0.83466	942	ILMN_1672097
PDCD1LG2	0.225543	6.58702	3.44039	0.000758206	0.0131005	-0.836503	80380	ILMN_2159272
OTUD6A	-0.110882	6.6959	-3.44031	0.000758416	0.0131005	-0.836756	139562	ILMN_1730567
ATL3	0.304311	7.92771	3.44006	0.000759073	0.0131046	-0.837545	25923	ILMN_1751086
NUBP1	-0.259423	8.28029	-3.43989	0.000759499	0.0131047	-0.838056	4682	ILMN_1689342
NACC2	0.23376	7.47868	3.43898	0.000761866	0.0131383	-0.840891	138151	ILMN_1809522
LOC100127919	-0.116322	6.75455	-3.43848	0.000763175	0.0131536	-0.842455	100127919	ILMN_3270511
FCRL5	0.267327	7.91045	3.43804	0.00076431	0.0131616	-0.843808	83416	ILMN_1684445
TESK2	0.307558	7.5104	3.43798	0.000764474	0.0131616	-0.844004	10420	ILMN_1654370
LRRC61	0.200954	7.20539	3.43771	0.000765182	0.0131665	-0.844847	65999	ILMN_1669722
FADS1	0.232511	7.09991	3.43743	0.000765909	0.0131701	-0.845713	3992	ILMN_1670134
C6orf192	-0.404124	7.95657	-3.4372	0.000766505	0.0131701	-0.846421	116843	ILMN_1669831
IL27	0.296836	6.9481	3.43711	0.000766758	0.0131701	-0.846722	246778	ILMN_1753758
MIR98	-0.134618	6.83315	-3.43699	0.000767072	0.0131701	-0.847094	407054	ILMN_3308592
BZRAP1	0.215904	7.08658	3.43599	0.000769682	0.0132077	-0.850189	9256	ILMN_2111229
TBC1D7	0.280947	8.48049	3.43539	0.000771247	0.0132255	-0.852039	51256	ILMN_1661622
RAB27A	0.20968	8.68452	3.43527	0.000771567	0.0132255	-0.852417	5873	ILMN_1665859
CHD6	-0.174688	7.58652	-3.43488	0.000772601	0.0132295	-0.853637	84181	ILMN_1781816
ARMCX2	0.181193	7.01136	3.43486	0.000772645	0.0132295	-0.853689	9823	ILMN_1785170
EXOC3L2	0.121552	6.74522	3.4346	0.000773351	0.0132344	-0.854521	90332	ILMN_1670038
ELK1	0.242775	8.95091	3.43301	0.000777535	0.0132936	-0.859436	2002	ILMN_1654289
PRNP	-0.207309	9.54456	-3.43289	0.000777866	0.0132936	-0.859823	5621	ILMN_1737988
CCDC101	-0.219956	7.95791	-3.43281	0.000778084	0.0132936	-0.860078	112869	ILMN_1684789
RPP21	-0.247531	10.6735	-3.43071	0.000783656	0.0133815	-0.866577	79897	ILMN_2186597
UBR5	0.208451	8.13188	3.43028	0.000784824	0.0133942	-0.867934	51366	ILMN_1741253
SRP19	0.296493	9.42575	3.42992	0.00078578	0.0133945	-0.869043	6728	ILMN_2192032
TRERF1	-0.142583	7.18944	-3.42979	0.000786121	0.0133945	-0.869437	55809	ILMN_1666556
CREBBP	-0.214657	9.26954	-3.42979	0.000786128	0.0133945	-0.869446	1387	ILMN_1809583
IFNB1	-0.104062	6.5188	-3.42821	0.000790382	0.0134597	-0.874361	3456	ILMN_1682245
NICN1	0.225286	8.98324	3.42763	0.000791944	0.0134734	-0.876158	84276	ILMN_1807211
PSMA1	0.208389	9.47639	3.42759	0.000792049	0.0134734	-0.876279	5682	ILMN_1691809
F12	0.265398	7.53583	3.42726	0.000792942	0.0134757	-0.877306	2161	ILMN_1671766
ENPP4	0.308832	7.4228	3.42722	0.000793043	0.0134757	-0.877421	22875	ILMN_1781761
LOC100132707	-0.132089	7.01475	-3.4259	0.000796621	0.0135292	-0.881521	100132707	ILMN_3204136
KIAA1009	0.180175	7.77704	3.4255	0.0007977	0.0135402	-0.882753	22832	ILMN_1781174
MTRF1L	0.187018	8.74371	3.42459	0.00080016	0.0135746	-0.885556	54516	ILMN_1786684
POLA1	0.267765	7.50535	3.42183	0.000807712	0.01369	-0.89411	5422	ILMN_2191436
SNAP23	0.309221	8.66541	3.42179	0.000807838	0.01369	-0.894253	8773	ILMN_1687519
FEM1A	-0.3773	9.48896	-3.42042	0.000811608	0.0137464	-0.898491	55527	ILMN_1719985
PCK2	0.187367	7.85462	3.41912	0.000815207	0.0137999	-0.90252	5106	ILMN_1671791
LY6D	-0.103823	6.50409	-3.41892	0.000815757	0.0138018	-0.903133	8581	ILMN_1814270
TCEB1	0.255388	9.55816	3.41872	0.000816307	0.0138034	-0.903747	6921	ILMN_1704873
RAB40C	-0.237383	9.86912	-3.41857	0.000816732	0.0138034	-0.904221	57799	ILMN_1712705
CSTF2T	0.207818	7.08431	3.41789	0.000818602	0.0138275	-0.906303	23283	ILMN_1807515
LOC652557	-0.131608	6.96699	-3.41734	0.000820145	0.0138397	-0.908017	652557	ILMN_1793009
IL2RB	0.382498	10.8839	3.41732	0.000820204	0.0138397	-0.908083	3560	ILMN_1684349
ZBED5	-0.192848	9.54387	-3.41608	0.000823676	0.0138908	-0.911927	58486	ILMN_1664424
TCF19	0.0980951	6.93444	3.41497	0.000826763	0.0139303	-0.915333	6941	ILMN_1682008
MYL12A	0.445512	12.6156	3.41492	0.000826907	0.0139303	-0.915492	10627	ILMN_1675848
SLC39A8	0.533976	7.94028	3.41456	0.000827938	0.0139401	-0.916625	64116	ILMN_1695316
LOC729451	-0.166776	6.91106	-3.41376	0.000830187	0.0139561	-0.919095	729451	ILMN_3221473
MAPRE2	0.212318	9.62049	3.41362	0.000830584	0.0139561	-0.919531	10982	ILMN_1695276
PFAAP5	-0.224112	8.14273	-3.41361	0.000830605	0.0139561	-0.919554	10443	ILMN_1797893
LOC653635	-0.228399	7.49609	-3.41359	0.000830666	0.0139561	-0.91962	653635	ILMN_1658957
ANKS1A	0.213226	8.75306	3.41285	0.000832755	0.0139837	-0.921907	23294	ILMN_1813669
PMF1	-0.271415	7.87783	-3.41262	0.000833389	0.0139868	-0.922599	11243	ILMN_1756445
LOC388532	-0.404536	11.5627	-3.41115	0.000837566	0.0140494	-0.927149	388532	ILMN_1656292
LOC390345	-0.388908	12.8979	-3.40975	0.000841545	0.0141086	-0.931463	390345	ILMN_3284584
ICAM1	0.353778	7.60441	3.40951	0.000842242	0.0141112	-0.932217	3383	ILMN_1812226
STAU2	0.1825	7.48945	3.40938	0.0008426	0.0141112	-0.932603	27067	ILMN_1769720
UNC84B	-0.240803	12.916	-3.40881	0.000844247	0.0141312	-0.93438	25777	ILMN_2099301
DUSP6	-0.397654	9.0158	-3.40842	0.000845353	0.0141422	-0.935572	1848	ILMN_1677466
LOC654194	-0.520925	11.9829	-3.40816	0.000846106	0.0141472	-0.936381	654194	ILMN_1755808
SAR1B	0.275482	7.87251	3.40708	0.000849215	0.0141916	-0.939719	51128	ILMN_1736888
TMBIM4	-0.147582	11.5458	-3.40537	0.000854151	0.0142652	-0.944994	51643	ILMN_1664750
TBC1D3F	-0.176328	7.65794	-3.40524	0.000854528	0.0142652	-0.945395	729873	ILMN_3223246
LOC645818	0.142519	6.93761	3.40486	0.000855624	0.0142759	-0.946561	645818	ILMN_1676703
NCOA2	0.150065	6.77904	3.40458	0.000856447	0.014282	-0.947437	10499	ILMN_1769040
TBC1D24	0.248005	7.32908	3.40343	0.000859789	0.0143228	-0.95098	57465	ILMN_1780197
SCO2	0.532377	10.3755	3.40342	0.000859807	0.0143228	-0.950999	9997	ILMN_1701621
HLA-DRB6	-0.545306	11.1492	-3.4023	0.000863085	0.0143698	-0.954461	3128	ILMN_2066060
PAOX	-0.18038	7.48359	-3.40137	0.00086581	0.0144075	-0.957329	196743	ILMN_1765116
HNMT	-0.189697	7.44521	-3.40114	0.000866493	0.0144112	-0.958047	3176	ILMN_1705984
LOC644516	0.163491	6.98069	3.40083	0.000867377	0.0144172	-0.958975	644516	ILMN_1767149
FNIP1	-0.231155	7.96883	-3.4007	0.000867777	0.0144172	-0.959394	96459	ILMN_1737343
KCNE1	0.260437	6.82511	3.40047	0.000868441	0.0144206	-0.960089	3753	ILMN_2047618
PLD4	-0.184635	7.1999	-3.40025	0.000869107	0.014424	-0.960787	122618	ILMN_1695490
LOC442727	-0.417685	8.20444	-3.39962	0.000870947	0.0144418	-0.962712	442727	ILMN_3291472
RIPK5	-0.230475	8.15717	-3.39946	0.000871415	0.0144418	-0.9632	25778	ILMN_1779600
ICAM5	0.140482	6.996	3.3992	0.000872201	0.0144418	-0.96402	7087	ILMN_1802524
PPP1R3B	0.161426	7.0921	3.39919	0.000872207	0.0144418	-0.964027	79660	ILMN_1712236
DHRS4L2	-0.333343	7.86687	-3.3991	0.000872484	0.0144418	-0.964315	317749	ILMN_1761450
LOC728244	-0.29	12.7305	-3.39803	0.000875635	0.0144863	-0.967595	728244	ILMN_3238782
MRPL1	0.240639	8.07653	3.39696	0.000878833	0.0145316	-0.970911	65008	ILMN_2076658
RPA4	0.146371	6.83963	3.39671	0.000879575	0.0145362	-0.971679	29935	ILMN_1798880
CDCA4	0.166514	7.69603	3.39652	0.000880138	0.0145378	-0.972261	55038	ILMN_1684045
FLJ45032	0.124727	7.29871	3.39627	0.000880868	0.0145422	-0.973015	643853	ILMN_1774211
LOC392301	0.175952	7.1203	3.39574	0.00088245	0.0145607	-0.974647	392301	ILMN_3279652
EEF1B2	-0.258369	11.3383	-3.39534	0.000883643	0.0145727	-0.975877	1933	ILMN_1675541
HSD17B11	-0.258399	9.92339	-3.39508	0.000884437	0.0145781	-0.976694	51170	ILMN_1675117
COPB1	0.21176	9.73881	3.39422	0.000887003	0.0146127	-0.979328	1315	ILMN_1699112
MAD2L2	0.248088	10.2815	3.39364	0.000888757	0.0146339	-0.981126	10459	ILMN_1669550
SRPK1	0.264568	9.06986	3.39241	0.000892463	0.0146872	-0.98491	6732	ILMN_1798804
ATP13A1	-0.255264	8.18409	-3.39217	0.000893179	0.0146913	-0.98564	57130	ILMN_2134224
ASXL1	-0.202875	8.7572	-3.39164	0.000894786	0.01471	-0.987275	171023	ILMN_1726025
XPNPEP3	0.286041	12.8709	3.39074	0.000897493	0.0147467	-0.990022	63929	ILMN_1659000
NRAS	0.217229	7.31385	3.38987	0.000900144	0.0147826	-0.992705	4893	ILMN_1775759
IL5RA	-0.237599	7.34884	-3.38915	0.000902342	0.0148109	-0.994923	3568	ILMN_1756455
MAPK12	0.142286	6.63248	3.38847	0.000904405	0.014837	-0.996999	6300	ILMN_1797786
C14orf166	0.310702	9.76545	3.38785	0.000906316	0.0148606	-0.998919	51637	ILMN_1696708
DFFA	-0.19403	7.98525	-3.38763	0.000906991	0.0148638	-0.999595	1676	ILMN_1667213
MAP3K1	-0.272052	10.6815	-3.38678	0.000909595	0.0148987	-1.0022	4214	ILMN_1723020
TYW3	-0.247168	7.51018	-3.38608	0.000911728	0.0149259	-1.00433	127253	ILMN_1726842
FLJ25439	-0.157782	7.03474	-3.3858	0.000912596	0.0149272	-1.0052	153657	ILMN_1789807
PLCG2	0.194873	10.7286	3.38574	0.000912792	0.0149272	-1.00539	5336	ILMN_1815719
MIR550-2	-0.131793	6.87096	-3.38549	0.000913572	0.0149272	-1.00617	693134	ILMN_3307997
LOC641724	-0.161947	7.22229	-3.38544	0.000913718	0.0149272	-1.00632	641724	ILMN_1722929
ATP8B2	-0.228293	8.36052	-3.38468	0.000916064	0.0149578	-1.00865	57198	ILMN_1782057
PSMA6	0.252633	11.1414	3.38408	0.000917924	0.0149803	-1.01049	5687	ILMN_1704094
CCL4L2	0.574186	8.79381	3.38351	0.000919679	0.0149945	-1.01223	388372	ILMN_1677591
EXOSC5	-0.280834	8.29289	-3.38342	0.000919975	0.0149945	-1.01252	56915	ILMN_1659725
CHUK	0.213942	8.46227	3.38333	0.000920226	0.0149945	-1.01277	1147	ILMN_1677041
SAP18	0.24174	7.35976	3.38273	0.000922107	0.0150173	-1.01463	10284	ILMN_1752793
MAP1D	-0.135424	6.91412	-3.38215	0.000923897	0.0150386	-1.01639	254042	ILMN_1740294
KLHL12	0.13737	8.62084	3.38064	0.000928623	0.0150952	-1.02103	59349	ILMN_1676075
HSPC047	-0.182746	7.30215	-3.38053	0.000928973	0.0150952	-1.02137	29060	ILMN_1726678
HSP90AB1	0.539881	10.8645	3.38047	0.000929167	0.0150952	-1.02156	3326	ILMN_1673711
PCSK6	0.0826993	6.82223	3.38042	0.000929313	0.0150952	-1.0217	5046	ILMN_1676384
EBF1	-0.203346	7.35916	-3.38027	0.00092978	0.0150952	-1.02216	1879	ILMN_1778681
MRPL34	-0.24245	9.99927	-3.37921	0.000933107	0.0151414	-1.02541	64981	ILMN_1783681
LOC646294	-0.199713	13.3251	-3.3765	0.000941673	0.0152724	-1.03371	646294	ILMN_3217815
WDR67	0.238795	7.8639	3.37473	0.000947294	0.0153487	-1.03912	93594	ILMN_1744240
SEC61A1	-0.306309	10.9754	-3.37471	0.000947357	0.0153487	-1.03918	29927	ILMN_1659564
RBM23	0.211458	10.5948	3.37455	0.000947865	0.015349	-1.03967	55147	ILMN_1780756
RINT1	-0.185894	7.60846	-3.37407	0.000949424	0.0153664	-1.04117	60561	ILMN_1784584
LOC442454	-0.296342	11.2737	-3.37371	0.000950571	0.015377	-1.04226	442454	ILMN_1711729
RNH1	-0.248838	9.37094	-3.37296	0.000952957	0.0154076	-1.04454	6050	ILMN_1660880
LOC728059	0.409635	8.52205	3.37262	0.000954071	0.0154177	-1.0456	728059	ILMN_3212591
PCDHGB6	-0.165648	7.44198	-3.37199	0.000956089	0.0154423	-1.04752	56100	ILMN_1701644
OR2W3	-0.772728	8.44662	-3.37152	0.000957604	0.0154572	-1.04896	343171	ILMN_1811927
SBDSP	-0.250275	8.08479	-3.3714	0.000957995	0.0154572	-1.04933	155370	ILMN_1765725
C1RL	0.260974	8.38017	3.37091	0.000959569	0.0154746	-1.05083	51279	ILMN_1733288
RAPGEF1	-0.236458	9.22472	-3.37039	0.000961252	0.0154938	-1.05242	2889	ILMN_1678799
HPD	0.186968	7.13635	3.37005	0.000962339	0.0155033	-1.05345	3242	ILMN_1745688
CMTM2	-0.567346	10.5287	-3.36919	0.000965122	0.0155402	-1.05607	146225	ILMN_1799030
RRAGD	0.24619	9.20647	3.36775	0.000969814	0.0156077	-1.06048	58528	ILMN_1699772
GNB4	-0.262008	7.41021	-3.36489	0.000979198	0.0157506	-1.06923	59345	ILMN_1733249
HOPX	0.344797	8.53831	3.3642	0.000981456	0.0157788	-1.07132	84525	ILMN_1735570
CBX7	-0.322176	9.30362	-3.36358	0.000983519	0.0158039	-1.07323	23492	ILMN_1657361
TESC	-0.81429	11.1893	-3.36229	0.000987768	0.0158584	-1.07714	54997	ILMN_1750181
HSD17B6	0.136361	6.98301	3.36224	0.000987925	0.0158584	-1.07729	8630	ILMN_1779855
NVL	-0.132838	7.63312	-3.36193	0.000988962	0.0158669	-1.07824	4931	ILMN_1712636
GTPBP6	-0.284857	10.7202	-3.35933	0.000997627	0.0159978	-1.08617	8225	ILMN_1776080
APCDD1	-0.139402	7.04999	-3.3585	0.00100041	0.0160251	-1.08869	147495	ILMN_1656951
LOC100130750	-0.136309	7.02403	-3.35844	0.00100061	0.0160251	-1.08888	100130750	ILMN_3177691
PSG3	0.248115	7.79315	3.35824	0.0010013	0.0160251	-1.08951	5671	ILMN_1685312
C4orf27	0.278523	7.62327	3.35822	0.00100137	0.0160251	-1.08957	54969	ILMN_1698677
KIF15	0.201857	7.23151	3.35791	0.0010024	0.0160312	-1.0905	56992	ILMN_1753063
PSME2	0.373583	12.0004	3.35768	0.00100318	0.0160312	-1.09121	5721	ILMN_1786612
RABEP1	-0.26144	9.28835	-3.35763	0.00100335	0.0160312	-1.09136	9135	ILMN_1719622
DGUOK	-0.17077	9.80536	-3.35749	0.0010038	0.0160312	-1.09177	1716	ILMN_1658481
DLGAP4	0.167809	7.24934	3.35703	0.00100538	0.0160482	-1.0932	22839	ILMN_1749944
RARS2	-0.211762	8.13202	-3.3548	0.00101291	0.0161602	-1.09998	57038	ILMN_1758214
TMEM192	-0.170943	7.44544	-3.35437	0.00101437	0.0161751	-1.10128	201931	ILMN_1780618
LOC284167	-0.195413	8.03753	-3.35344	0.00101753	0.0162174	-1.10412	284167	ILMN_3293049
BCLAF1	-0.17643	8.50871	-3.3532	0.00101837	0.0162224	-1.10486	9774	ILMN_1690321
GIMAP7	-0.33889	11.2123	-3.35243	0.00102101	0.0162562	-1.10721	168537	ILMN_1776678
OLFM1	-0.123688	6.62962	-3.35212	0.00102206	0.0162567	-1.10815	10439	ILMN_1714709
PATL2	0.219657	7.73205	3.35202	0.00102239	0.0162567	-1.10844	197135	ILMN_3229046
PPP1R12A	0.266213	8.01785	3.35196	0.00102259	0.0162567	-1.10862	4659	ILMN_1739622
IRF9	0.243424	11.9126	3.35118	0.00102527	0.0162909	-1.11099	10379	ILMN_1745471
LOC100128060	-0.409937	8.96355	-3.3508	0.00102659	0.0163037	-1.11216	100128060	ILMN_3188076
LOC100131630	0.126488	6.78186	3.34998	0.00102942	0.0163404	-1.11467	100131630	ILMN_3293949
ACAT1	0.267281	9.41079	3.34948	0.00103115	0.0163595	-1.11619	38	ILMN_1800008
LOC644790	-0.319293	10.2278	-3.34879	0.00103353	0.0163889	-1.11828	644790	ILMN_3290353
LOC100131487	-0.116269	6.73346	-3.34796	0.00103639	0.016426	-1.12079	100131487	ILMN_3206986
UBASH3A	-0.270098	7.68705	-3.34739	0.00103838	0.0164411	-1.12253	53347	ILMN_1684450
APBB1IP	0.308573	11.2396	3.34738	0.00103839	0.0164411	-1.12254	54518	ILMN_1801710
ADRB2	-0.348002	8.93976	-3.34704	0.00103958	0.0164516	-1.12358	154	ILMN_1695590
LOC729255	-0.319441	8.03251	-3.34645	0.00104164	0.016476	-1.12538	729255	ILMN_3227563
ITGAE	0.235743	8.88804	3.3458	0.00104391	0.0165035	-1.12736	3682	ILMN_1683927
AKR1C4	-0.134691	7.01953	-3.34523	0.00104591	0.0165268	-1.1291	1109	ILMN_1668880
GALC	0.17898	8.19259	3.34503	0.00104661	0.0165295	-1.1297	2581	ILMN_1799744
LOC220433	-0.390605	10.4582	-3.34484	0.00104726	0.0165314	-1.13026	220433	ILMN_1795243
LPAR2	0.384028	9.58442	3.34444	0.00104869	0.0165456	-1.1315	9170	ILMN_3236220
INSRR	-0.154155	7.00913	-3.34335	0.0010525	0.0165974	-1.13479	3645	ILMN_1715374
LOC731275	0.100826	6.84371	3.34206	0.00105705	0.0166608	-1.13871	731275	ILMN_3231601
LOC649395	-0.170712	6.87729	-3.34116	0.00106025	0.0167028	-1.14145	649395	ILMN_3279996
FLJ43681	-0.434135	11.1755	-3.3409	0.00106115	0.0167035	-1.14223	388574	ILMN_3235148
CYP2S1	-0.140451	6.78596	-3.34084	0.00106136	0.0167035	-1.14241	29785	ILMN_1705403
LOC728989	-0.112065	6.75257	-3.34053	0.00106249	0.0167129	-1.14337	728989	ILMN_3243102
LOC650518	0.303828	11.0393	3.3398	0.00106505	0.0167448	-1.14556	650518	ILMN_1675852
CCDC92	-0.311777	9.68511	-3.33955	0.00106597	0.0167509	-1.14634	80212	ILMN_1731107
TMPRSS3	0.0744016	6.85789	3.33884	0.00106849	0.0167819	-1.14848	64699	ILMN_1675677
SH2D2A	0.23162	7.67925	3.33667	0.00107625	0.0168954	-1.15505	9047	ILMN_1733874
TMEM206	-0.202891	7.68238	-3.33567	0.00107988	0.0169389	-1.15811	55248	ILMN_3247821
ASB8	0.157112	8.88229	3.3356	0.0010801	0.0169389	-1.1583	140461	ILMN_1783675
VAMP3	0.298357	9.98778	3.33503	0.00108219	0.0169553	-1.16004	9341	ILMN_1714527
[truncated: 29,335 more rows]
