# Supplementary material for: Comparative transcriptomic analysis reveals translationally relevant processes in mouse models of malaria
Source: eLife. 2022 Jan 10;11:e70763. doi: 10.7554/eLife.70763 (PMC8747512; doi:10.7554/eLife.70763)
Supplement: Supplementary file 7. [file elife-70763-supp7.xlsx]

## Sheet: Key
Supplementary File 7 Boldt et al 2019 Differential Expression Analysis
Table Column Names Key
Description: The results of the differential expression Analysis of the Boldt et al., 2019 microarray dataset
Gene	Gene Symbols
Pvalue	p-value
FDR	false discovery rate corrected p-value
logFC	log fold change
Tab Names Key
CM	Cerebral Malaria
Healthy	Healthy
SA	Severe Anaemia
UM	Uncomplicated Malaria

## Sheet: UM-Healthy
Gene	Pvalue	FDR	logFC
PID1	7.02e-06	0.0948665	-1.52964
G0S2	7.03e-05	0.474807	3.35861
PTGS2	0.000192571	0.661909	2.25847
RNF13	0.000195903	0.661909	-1.23669
BPGM	0.000394876	0.799971	2.28034
HIST1H1T	0.000488421	0.799971	-1.69492
S1PR1	0.00050999	0.799971	-1.23455
CLC	0.000573161	0.799971	-3.41171
RHPN1-AS1	0.000705257	0.799971	0.999693
OXR1	0.000711107	0.799971	-1.26614
GZMB	0.000774934	0.799971	1.58973
OR2H1	0.000792784	0.799971	1.60187
HNRNPCL1 /// HNRNPCL2 /// LOC101060301 /// LOC649330	0.000815938	0.799971	1.1244
2003-03-01	0.000926071	0.799971	1.0841
CHD1	0.0010199	0.799971	-1.16329
ETNK2	0.00102008	0.799971	0.801808
CD302 /// LY75 /// LY75-CD302	0.00110756	0.799971	-1.47792
EGR1	0.00111468	0.799971	1.81803
KANK2	0.00112463	0.799971	0.880453
NR1D2	0.00138881	0.932047	-1.28559
GLS2	0.00149646	0.932047	-1.12097
NTRK1	0.00168185	0.932047	0.785911
ZBTB38	0.00168848	0.932047	-1.48427
STAT3	0.00173752	0.932047	1.12283
TCF4	0.00178034	0.932047	-0.830908
OPN3	0.00180711	0.932047	-0.798501
OSBPL8	0.00199863	0.932047	-0.896097
SFT2D3 /// WDR33	0.00215655	0.932047	-1.22997
ATP8B1	0.00215994	0.932047	-1.57773
FOS	0.00229727	0.932047	2.95281
ATP2B1	0.00231026	0.932047	-0.977241
AKAP12	0.00238879	0.932047	-1.22436
RIC3	0.00243327	0.932047	1.26315
YWHAB	0.00248113	0.932047	-0.912101
ADORA3	0.00256101	0.932047	-1.54542
CD3G	0.00264801	0.932047	-2.27703
ANK1	0.00272953	0.932047	1.51714
PPP2R3A	0.00277252	0.932047	0.924463
SCUBE3	0.00278007	0.932047	1.44837
AGO3	0.00282829	0.932047	-0.806207
ENO3	0.00294274	0.932047	-1.21037
GUSB	0.0029505	0.932047	0.768881
LOC101928747 /// RBMX /// SNORD61	0.00296545	0.932047	-1.2634
CREB1	0.00320194	0.975179	-0.778751
RBL2	0.00326518	0.975179	-1.53611
OPTN	0.00332613	0.975179	1.07001
MYH7	0.0033913	0.975179	-0.965486
MPHOSPH10	0.00355264	0.986613	-1.86293
ZWINT	0.00361659	0.986613	1.11416
ACTA2	0.00379542	0.986613	0.751227
IFI27	0.00380236	0.986613	4.86756
FAM46C	0.00383273	0.986613	1.25372
EXOC5	0.00390573	0.986613	-1.12261
KMT2A /// LOC101929115	0.00394207	0.986613	1.24421
CDC123	0.00414992	0.998922	-0.799913
FYB	0.0042674	0.998922	-1.38647
MZT2B	0.00446008	0.998922	-1.9718
PHACTR2	0.00453733	0.998922	-0.862756
ARHGEF40	0.00458889	0.998922	-1.11358
TSPO2	0.00472757	0.998922	1.55287
FOSB	0.00473436	0.998922	1.84527
HK1	0.00483276	0.998922	1.96562
C2orf54	0.0048661	0.998922	0.964996
EFTUD1	0.00497759	0.998922	-0.79859
NXPH3	0.00499898	0.998922	1.33803
RBX1	0.00516337	0.998922	1.70375
MS4A6A	0.00528895	0.998922	-1.52617
FBXO16 /// ZNF395	0.00543866	0.998922	-1.55056
TMOD1	0.00547436	0.998922	0.946225
ZNF81	0.00551614	0.998922	0.915632
PTPN4	0.00564454	0.998922	-1.18826
PINK1	0.00566098	0.998922	1.02737
MAP3K5	0.00578799	0.998922	-0.81568
GYPB	0.00591966	0.998922	1.77039
CATSPER2 /// CATSPER2P1 /// LOC101930343	0.0059791	0.998922	1.76829
OCA2	0.00610548	0.998922	1.21015
PCYOX1	0.00618337	0.998922	-0.793082
GJA9-MYCBP /// MYCBP	0.00623546	0.998922	0.697696
PBX3	0.00626511	0.998922	-1.30704
FNBP1	0.00635414	0.998922	-0.797515
PJA2	0.00637903	0.998922	-0.978736
ICAM1	0.00643922	0.998922	0.98325
GPR125	0.00663444	0.998922	-0.916767
ACE	0.00685459	0.998922	0.862077
RNASET2	0.00686237	0.998922	-1.25756
DUSP9	0.00686806	0.998922	0.767661
FRMD8	0.00689644	0.998922	1.08604
MIR6732 /// ZC3H12A	0.00696536	0.998922	1.46397
OSBPL11	0.00702106	0.998922	-1.29923
GRK4	0.00716621	0.998922	-0.701099
GLE1	0.00731947	0.998922	0.820497
FXYD6	0.00739669	0.998922	-1.43253
LRCH1	0.00761194	0.998922	-1.32996
PPP1R14B	0.00761511	0.998922	-1.07014
ANO2	0.0077793	0.998922	0.831523
MAP3K1	0.00779458	0.998922	-2.18104
SUV420H1	0.00783262	0.998922	-0.759644
FAM106A	0.00798129	0.998922	0.81023
FCGR2C	0.0079915	0.998922	-1.06008
RCE1	0.00804968	0.998922	0.869934
2001-03-01	0.00807125	0.998922	-1.08875
RBPJ	0.00821624	0.998922	-0.825321
SETD6	0.00829404	0.998922	-0.862855
MFSD11	0.00834262	0.998922	1.01899
GPR6	0.0083823	0.998922	1.27736
YIPF4	0.00846161	0.998922	-0.675926
EGR2	0.00857544	0.998922	1.40286
FAR2	0.00871247	0.998922	-1.49172
FOXO4	0.00885513	0.998922	1.14536
TAS2R1	0.00895603	0.998922	-1.03181
POM121 /// POM121C	0.00910266	0.998922	-0.973101
BMPR2	0.00920525	0.998922	-0.82551
FZD4	0.00926946	0.998922	1.73332
PWWP2A	0.00931521	0.998922	0.948134
CPVL	0.0094397	0.998922	-0.835925
MST1R	0.00958707	0.998922	1.95265
CLIC2	0.00966447	0.998922	1.70638
BC113958	0.00971657	0.998922	-0.945949
HOXA10	0.00977144	0.998922	-1.026
SNAP23	0.00979063	0.998922	-0.715101
RCN3	0.00994687	0.998922	0.631412
RHD	0.0100586	0.998922	1.07819
THAP11	0.0100607	0.998922	-0.986795
RBBP5	0.0101206	0.998922	-1.03408
GYPE	0.0101429	0.998922	0.772727
TNS1	0.0103077	0.998922	1.21165
HLA-DQB1 /// LOC101060835	0.010316	0.998922	-0.790162
CLIP4	0.0103428	0.998922	-1.33949
RCAN3	0.0104501	0.998922	-0.638337
RAD54B	0.0104757	0.998922	-1.1173
SH3BP5	0.0105784	0.998922	-0.790806
MAGEA8	0.0106127	0.998922	-0.975597
KCNN1	0.0106279	0.998922	1.70588
AHSP	0.0106877	0.998922	1.50585
CD180	0.010695	0.998922	-1.1778
NPVF	0.0107276	0.998922	1.0416
TSPAN7	0.010751	0.998922	1.11385
SLC25A37	0.0108639	0.998922	1.18848
TTC3 /// TTC3P1	0.0111068	0.998922	-0.669514
LYN	0.0111851	0.998922	-0.972558
ZC3HAV1	0.0112324	0.998922	1.05666
SLC25A17	0.0113231	0.998922	0.79714
RNASE6	0.0114617	0.998922	-1.20888
H1F0	0.0115353	0.998922	1.32416
FAM49B	0.0116781	0.998922	0.827127
CTBS	0.0117007	0.998922	-0.854139
NOX5	0.0117484	0.998922	1.29137
CEP72	0.0117645	0.998922	-1.45673
SSTR3	0.0117712	0.998922	0.974782
MYL5	0.0117821	0.998922	-1.21269
CYP17A1	0.0118604	0.998922	1.02967
MARCKS	0.0119205	0.998922	-0.972036
HMGB2	0.0119991	0.998922	1.37419
CACNG4	0.0120357	0.998922	0.811445
C1orf115	0.0125374	0.998922	1.04875
FTSJ2	0.0126246	0.998922	-0.876661
PDCL3 /// PDCL3P4	0.0126342	0.998922	-0.811581
S100A3	0.0126881	0.998922	1.02276
COMMD4	0.0127118	0.998922	0.556202
CNPPD1	0.0127188	0.998922	1.38358
EMILIN2	0.012772	0.998922	1.30371
RHOQ	0.012854	0.998922	-0.595903
RNF10	0.0128579	0.998922	1.16942
CD44	0.0129116	0.998922	-0.69813
ABCG2	0.0129274	0.998922	0.842929
RNF219	0.0129474	0.998922	-0.658325
TRIM16	0.0130124	0.998922	0.774562
TFDP2	0.0130673	0.998922	0.934109
RPL23AP22 /// RPL23AP22	0.0133956	0.998922	-1.08114
TMEM168	0.0133973	0.998922	-1.43428
BST2	0.0134367	0.998922	0.814548
KIAA0100	0.0134567	0.998922	-1.44963
CEP350	0.0134856	0.998922	-0.725743
MS4A1	0.0135129	0.998922	-1.36841
CPSF1 /// MIR1234 /// MIR6849 /// MIR939	0.0135502	0.998922	-1.27
NBEAL2	0.0136879	0.998922	1.10831
HTRA1	0.0137717	0.998922	1.42238
KCTD12	0.0139411	0.998922	-0.943074
MSH5-SAPCD1 /// SAPCD1	0.0140074	0.998922	0.727587
ZNF273	0.0141055	0.998922	-0.619046
OR2H2	0.0141636	0.998922	0.811964
PACSIN2	0.0143411	0.998922	-1.30898
MON1B	0.0144849	0.998922	-1.08403
TIMP2	0.0147293	0.998922	-1.25966
DMTN	0.0149152	0.998922	1.2404
SLC1A5	0.0149889	0.998922	1.40517
QSOX1	0.014994	0.998922	1.21751
VIM	0.0150298	0.998922	-0.737076
DSC2	0.0150391	0.998922	-1.29802
LRRC20	0.0150635	0.998922	-0.916522
DNAJA3	0.0154508	0.998922	0.785759
ZNF148	0.0154592	0.998922	-1.02136
SYPL1	0.0155102	0.998922	-0.53299
TAF1B	0.0156338	0.998922	-0.770968
FANCG	0.0157613	0.998922	1.21949
TM7SF3	0.0157843	0.998922	-0.847084
IRF9 /// RNF31	0.0160002	0.998922	-0.702611
NADSYN1	0.0160067	0.998922	-0.842697
UBTD1	0.0162505	0.998922	1.05103
FBXO24	0.0164305	0.998922	1.10763
TMEM230	0.0164359	0.998922	-1.04604
FDXR	0.016487	0.998922	1.12515
COL4A3BP	0.0165399	0.998922	-1.56294
GDF3	0.016703	0.998922	-1.51844
PLEKHA1	0.0167677	0.998922	-0.823743
LMO2	0.0168077	0.998922	-0.935108
CNTF	0.0169739	0.998922	1.0347
LOC441155 /// ZC3H11A	0.0170498	0.998922	-0.771052
YRDC	0.0170577	0.998922	0.871801
TAB1	0.0170742	0.998922	1.09156
CA1	0.0171251	0.998922	1.44048
SLC43A3	0.0171644	0.998922	0.724757
CPPED1	0.0171676	0.998922	-0.88617
LUZP2	0.0172716	0.998922	1.07392
GAS8	0.0172888	0.998922	1.90061
MPP1	0.0174992	0.998922	1.58758
DDX19A /// DDX19B	0.0175078	0.998922	-0.81194
PPP2R5E	0.017522	0.998922	-1.01549
GID4	0.0180078	0.998922	0.874103
RYK	0.0180656	0.998922	-0.713034
DYRK2	0.0180726	0.998922	-0.582907
PDP1	0.018206	0.998922	-1.03407
TERF2IP	0.0182113	0.998922	1.20887
TMEM106B	0.0183814	0.998922	-0.96576
RASA2	0.0183977	0.998922	-0.950897
TGFBI	0.0186081	0.998922	-0.925222
ZNF74	0.01862	0.998922	-0.849622
CALCB	0.0187023	0.998922	-0.988876
ZNF160	0.0188198	0.998922	-1.16562
RTEL1	0.0189036	0.998922	0.618613
NIPBL	0.0189273	0.998922	-0.755551
HBE1	0.0189902	0.998922	1.16962
LOC102723479	0.0189961	0.998922	0.914775
AMBRA1	0.0190996	0.998922	-0.766484
TMEM260	0.019294	0.998922	-0.943514
CCR3	0.0194222	0.998922	-2.00484
RIOK3	0.0194901	0.998922	1.03477
CDC42EP2	0.0196417	0.998922	-0.670842
TLE6	0.0197923	0.998922	-0.833182
LOC101928274 /// VSIG10	0.0198471	0.998922	-0.729147
RAB11FIP1	0.019937	0.998922	-1.15627
PEAK1	0.0200329	0.998922	0.858247
LINC00939	0.0204511	0.998922	0.589467
FAT4	0.0205594	0.998922	-0.7237
OAT	0.0206739	0.998922	1.07338
PTP4A2	0.0207086	0.998922	-0.625695
ZNF180	0.0207877	0.998922	-0.973362
SYT5	0.0208293	0.998922	0.627308
PTPRB	0.0209647	0.998922	0.592917
PAK3	0.0209733	0.998922	0.789687
RHCE /// RHD	0.0212539	0.998922	1.70471
BTD	0.0213328	0.998922	-0.726995
BCLAF1	0.0214953	0.998922	-0.732154
SUMO1P2 /// SUMO1P2	0.0216717	0.998922	0.742547
ASMT	0.021692	0.998922	0.559182
DNM1L	0.0217926	0.998922	0.689172
ADAP1	0.0218427	0.998922	0.889522
MEIS1	0.0219599	0.998922	-0.800291
ZNF668	0.0219744	0.998922	-0.471541
SQRDL	0.0222401	0.998922	-0.612933
ZNF652	0.0223297	0.998922	-0.849873
TRIM15	0.0223402	0.998922	-0.423132
UEVLD	0.0224603	0.998922	-0.55091
FPR1	0.0224726	0.998922	-0.840325
CSNK1G2	0.0225501	0.998922	-0.874745
GATAD1	0.0225765	0.998922	-0.649474
DPM2	0.0225801	0.998922	0.882527
OSGEPL1	0.0226785	0.998922	-0.987444
BCL11A	0.022705	0.998922	-0.667645
BBX	0.0229181	0.998922	-1.23462
LRRC31	0.0229327	0.998922	0.924049
PPM1A	0.0229651	0.998922	0.666563
TXNRD1	0.0230375	0.998922	-0.604112
TMEM104	0.0230387	0.998922	-0.83212
TUSC3	0.0230611	0.998922	0.570765
FAXDC2	0.0230888	0.998922	1.26581
KLF1	0.0232245	0.998922	1.20915
WBP2	0.0232295	0.998922	1.07792
ODC1	0.0232626	0.998922	0.684685
ATM	0.0233081	0.998922	-0.501864
ADAT1	0.0233228	0.998922	0.717761
E2F1	0.0234084	0.998922	0.735685
KPNA6	0.023514	0.998922	0.802779
APOBEC2	0.0236056	0.998922	0.590789
TLR2	0.0236207	0.998922	-1.02042
FOLH1	0.0236727	0.998922	1.15737
DYRK4	0.0237845	0.998922	-1.24715
ZNF222	0.0238183	0.998922	0.929227
SPINT3	0.0241047	0.998922	0.683957
RP1-181J22.1	0.0241195	0.998922	0.925443
PIM2	0.0242799	0.998922	1.4564
ACAD10	0.0242998	0.998922	0.601931
ATP7A	0.024335	0.998922	-0.814866
2009-09-01	0.0247011	0.998922	-0.659595
MAP2	0.0247203	0.998922	0.93199
WDR45	0.0247248	0.998922	1.02139
C22orf29 /// GNB1L	0.0248075	0.998922	-0.838725
CDKN2AIP	0.0248356	0.998922	-0.942739
FSHB	0.024956	0.998922	1.07131
CYR61	0.0250161	0.998922	0.719658
CLCN1	0.0250318	0.998922	-1.01069
TSTA3	0.0250519	0.998922	1.01462
ADD3	0.0250793	0.998922	-0.763488
ACSBG1	0.0251519	0.998922	0.532828
SH2D2A	0.0253298	0.998922	0.674986
BNIP3L	0.0253743	0.998922	1.137
NAGK	0.0254649	0.998922	-1.01378
VAT1	0.025491	0.998922	1.0439
PNPO	0.0256109	0.998922	-0.752293
NEK7	0.0260048	0.998922	-0.713923
HGC6.3	0.026073	0.998922	0.757114
TFRC	0.0261544	0.998922	1.53427
C1QTNF1	0.0262284	0.998922	1.103
ANXA2P3	0.0262382	0.998922	-0.902924
SSB	0.026258	0.998922	-0.628826
LRRFIP1	0.0263019	0.998922	-0.461543
BUB3	0.02638	0.998922	-0.635451
WNT8B	0.0264227	0.998922	0.574887
ARHGEF38	0.0267205	0.998922	1.16158
MBP	0.026746	0.998922	-0.884948
VPS13D	0.0269805	0.998922	-0.68286
OSBP	0.0271074	0.998922	0.656803
FAM117A	0.0271348	0.998922	0.884915
RUSC2	0.0271491	0.998922	-0.710671
PTTG1	0.0273151	0.998922	1.08604
RSF1	0.0274533	0.998922	-0.763056
BRF2	0.0275062	0.998922	-0.617221
RNF111	0.0276089	0.998922	-0.67372
FZD9	0.0276633	0.998922	0.715543
SRPR	0.0277065	0.998922	-1.09458
RBM5	0.0277143	0.998922	-0.678911
CORO1C	0.0278198	0.998922	0.676694
PIK3R1	0.0278848	0.998922	-0.815696
TELO2	0.0279397	0.998922	-0.610352
SCAF11	0.0279753	0.998922	-0.905756
PPP1R15A	0.0279768	0.998922	1.81623
TFDP1	0.0280713	0.998922	0.843393
SPATA7	0.0282047	0.998922	-0.545176
AKAP2 /// PALM2-AKAP2	0.0283063	0.998922	-0.53769
SP110	0.0283357	0.998922	-0.831118
MICA	0.028464	0.998922	-0.960583
FECH	0.0286722	0.998922	1.4657
VEZF1	0.0287694	0.998922	-0.692378
TXLNGY	0.0289443	0.998922	-1.44564
HMGXB4	0.0294132	0.998922	-0.737619
ATG2A	0.0294669	0.998922	0.681965
TNFRSF12A	0.0295162	0.998922	1.80824
GTF3C3	0.029794	0.998922	-0.57915
PRKAB2	0.0298141	0.998922	-0.846417
MRPS34	0.0298798	0.998922	0.969599
C1orf21	0.0299202	0.998922	0.741087
RASSF8	0.029958	0.998922	-0.875228
APOBEC3B	0.0300615	0.998922	-1.05991
DIP2A	0.0302096	0.998922	-1.34695
CDC34	0.0302497	0.998922	0.769804
ZFP36	0.0303522	0.998922	1.07335
KAZALD1	0.0303548	0.998922	-0.703529
CCDC121	0.0303991	0.998922	-0.699796
LOC102723559	0.030566	0.998922	1.16339
PRSS2	0.0306396	0.998922	-0.615279
PNP	0.0308474	0.998922	1.13283
ATP8A2	0.0309823	0.998922	0.701931
CXCL1	0.0310095	0.998922	0.725942
CNTD2	0.031039	0.998922	0.998679
PLAGL1	0.0311148	0.998922	-0.681543
MAFK	0.0311474	0.998922	0.746286
HIST1H3E	0.0312722	0.998922	0.540133
USP9Y	0.0312902	0.998922	-0.920094
ITGA10	0.0313011	0.998922	0.564244
EIF3A	0.0313236	0.998922	-0.741625
ZNF787	0.0313484	0.998922	0.874654
DES /// SUPT20H	0.0315015	0.998922	0.439399
CENPM	0.0315672	0.998922	1.28123
THEMIS2	0.031573	0.998922	-0.825153
RP1-8B22.1	0.0315753	0.998922	0.77811
TAPT1	0.031709	0.998922	-0.573805
C9orf9	0.0317852	0.998922	0.703498
TK1	0.0318701	0.998922	1.08177
AC009947.3 /// RBMY2AP /// RBMY2AP /// RBMY2BP /// RBMY2BP /// RBMY2DP /// RBMY2DP	0.0320024	0.998922	-0.994371
PTBP1	0.0321204	0.998922	0.493511
MKI67	0.0323059	0.998922	0.501754
VGLL4	0.032338	0.998922	-0.726999
NUCB1	0.0324821	0.998922	1.00999
KDR	0.0325324	0.998922	-0.646761
PTGDR2	0.0325731	0.998922	-0.858887
EXD2	0.0325946	0.998922	1.08911
2008-03-01	0.032648	0.998922	1.47679
PRTN3	0.0328594	0.998922	1.70636
CLASRP	0.0328836	0.998922	1.18403
MINPP1	0.0329092	0.998922	1.1596
GSE1	0.0329178	0.998922	-0.695569
NEO1	0.0329344	0.998922	-0.787064
IFNA1 /// IFNA13	0.0329726	0.998922	0.9626
FXYD2 /// FXYD6-FXYD2	0.0329766	0.998922	0.63462
CC2D1A	0.0330375	0.998922	0.471845
NMI	0.0331543	0.998922	-0.755279
CCNG1	0.0333235	0.998922	-0.694999
UBR7	0.0333961	0.998922	-0.722481
ATP5J2-PTCD1 /// PTCD1	0.0334511	0.998922	-0.744461
GGTLC2	0.0336714	0.998922	1.11019
FABP3P2 /// FABP3P2	0.0337326	0.998922	-0.89444
SIGMAR1	0.0338365	0.998922	-0.698313
GREM1	0.0338407	0.998922	0.614391
RBMY1A1 /// RBMY1B /// RBMY1D /// RBMY1E /// RBMY1F /// RBMY1J	0.0338723	0.998922	-0.805224
PSMG2	0.0339239	0.998922	-0.890072
GPX1	0.0339827	0.998922	1.56077
DUX1	0.0341077	0.998922	1.06285
ABCC8	0.0341552	0.998922	-0.442127
METAP2	0.0342609	0.998922	-0.573593
ZNF35	0.0343909	0.998922	1.3179
TRIM10	0.0344283	0.998922	0.610709
CA5A	0.0345015	0.998922	1.24396
HBD	0.0345023	0.998922	1.25939
RNF43	0.0346518	0.998922	0.808964
AMH /// MIR4321	0.0346696	0.998922	0.509231
LOC100996792 /// MAP2K3	0.0346826	0.998922	1.15832
LPP	0.0347345	0.998922	-0.60858
RANBP2	0.0347975	0.998922	-0.658559
H2AFX	0.034899	0.998922	0.372167
CRELD1	0.0350561	0.998922	0.669163
FBXO3	0.0351458	0.998922	-0.61254
PERP	0.0351882	0.998922	0.764053
DDX58	0.0352327	0.998922	-1.13483
PAQR6	0.0353212	0.998922	1.36169
MVK	0.0353222	0.998922	0.569344
MIR1292 /// NOP56 /// SNORD110 /// SNORD57 /// SNORD86	0.0353902	0.998922	-0.510735
NANS	0.0355255	0.998922	0.734376
LIN7B	0.0355501	0.998922	-1.00414
TAF4B	0.0355975	0.998922	0.4302
EIF5A	0.0357238	0.998922	0.874884
AF090939	0.0357993	0.998922	-0.837891
P2RY1	0.0358701	0.998922	-0.610073
CRIP1	0.0362101	0.998922	-1.22724
COL8A2	0.0362208	0.998922	0.668237
P2RX7	0.03623	0.998922	-0.742039
COL11A2	0.036286	0.998922	0.509954
2015-09-01	0.0363303	0.998922	-0.988193
UBE2B	0.0363354	0.998922	0.628995
ACBD3	0.0363879	0.998922	-0.483064
CUL4A	0.036509	0.998922	0.85463
DMBT1	0.0365131	0.998922	0.747644
VENTX	0.0365255	0.998922	0.947552
CCNB1	0.036626	0.998922	1.05737
AKAP13	0.0366472	0.998922	-0.743299
TUBB3	0.0366757	0.998922	0.951785
FUT8	0.0367027	0.998922	-0.952198
HGSNAT	0.0367245	0.998922	-1.1826
LYPD3	0.0369013	0.998922	-0.958301
DCAF11	0.0370014	0.998922	0.602945
SPAG5	0.0370036	0.998922	0.693837
KREMEN2	0.037006	0.998922	0.869566
CRYL1	0.0370993	0.998922	-0.738726
FAM65A	0.0371806	0.998922	-0.693815
ESF1	0.0372812	0.998922	-0.63827
FAM129A	0.0373147	0.998922	-0.978642
HBZ	0.0373244	0.998922	-1.49197
MMP20	0.037458	0.998922	0.568504
SERINC3	0.0374732	0.998922	-0.842501
APOF	0.0375126	0.998922	-0.551013
SIX6	0.037671	0.998922	0.567403
LOC254896 /// TNFRSF10C	0.0377092	0.998922	-0.882794
KLHL4	0.0377932	0.998922	0.841406
MAN2A2	0.0379489	0.998922	0.826613
ARHGAP25	0.0380528	0.998922	-0.856896
FCGR2A	0.0381782	0.998922	-1.2082
RPS4Y1	0.0384922	0.998922	-4.4258
PROSER1	0.0386953	0.998922	-0.592466
PEG10	0.0388274	0.998922	-0.499334
CACNA1E	0.0389327	0.998922	0.748233
REG1B	0.0391803	0.998922	0.657944
PPCS	0.0392179	0.998922	-0.846492
DOC2B	0.039249	0.998922	1.22626
ADAMTSL4	0.0394754	0.998922	-0.751179
C21orf59	0.0395401	0.998922	1.05788
ZER1	0.0398075	0.998922	0.649603
LIMD2	0.0398103	0.998922	-1.05764
KPNB1	0.0399443	0.998922	-0.516929
TTC39A	0.0399453	0.998922	0.516057
PCTP	0.03995	0.998922	0.995518
PIP4K2A	0.0399757	0.998922	1.00311
SLC29A3	0.0401696	0.998922	-1.63766
NACA2	0.0404356	0.998922	0.612208
GCNT3	0.0405938	0.998922	-0.912218
COL6A3	0.0407965	0.998922	-0.661243
VNN1	0.0408507	0.998922	1.21344
GSDMB	0.0408573	0.998922	0.706401
SPIN1	0.040968	0.998922	-1.01957
OLFML2B	0.0409757	0.998922	0.634872
PRDM1	0.0409841	0.998922	-0.97169
NSUN3	0.0410597	0.998922	0.945693
RAMP3	0.0410727	0.998922	0.931163
PRO2964	0.0411545	0.998922	0.729458
EMR3	0.0411647	0.998922	-1.41846
RAB14	0.0411847	0.998922	-0.584161
PRKG2	0.0412122	0.998922	1.03611
GLI1	0.0412905	0.998922	0.805419
CTNNA3	0.0412977	0.998922	0.747147
PHF20L1	0.0413337	0.998922	-0.86901
MMP7	0.0414052	0.998922	0.656459
OR10C1	0.0414941	0.998922	0.781344
NABP1	0.0416011	0.998922	-0.571672
TNFRSF8	0.0416148	0.998922	-0.711709
AGAP2	0.041712	0.998922	0.526014
COLEC10	0.0417626	0.998922	-0.767551
RAPGEF6	0.0418495	0.998922	1.7605
AMDHD2 /// CEMP1	0.0421038	0.998922	0.880099
CLTC	0.0422874	0.998922	-0.632001
THG1L	0.0423104	0.998922	-0.917588
KDM4B	0.0424041	0.998922	-0.673613
LEPROTL1	0.042549	0.998922	-0.477107
CFB	0.0428577	0.998922	0.650274
KRT1	0.0428938	0.998922	2.26974
BTN2A3P	0.0429658	0.998922	1.56912
CDC42SE1	0.0429838	0.998922	0.883986
STAU1	0.0429844	0.998922	0.496515
LGALS13	0.0429856	0.998922	-1.1924
PIGQ	0.0432006	0.998922	0.701019
EMID1	0.043275	0.998922	0.622274
HNRNPA3 /// HNRNPA3P1	0.0432775	0.998922	0.568963
AC007292.3	0.0433109	0.998922	-0.776599
ABLIM1	0.0433235	0.998922	-1.04
BIK	0.0434037	0.998922	1.01072
RAI1	0.0434201	0.998922	-0.696228
ALDH5A1	0.0436501	0.998922	0.659891
PKMYT1	0.0436811	0.998922	1.11532
MAPK3	0.0436905	0.998922	1.02953
MMD	0.0437698	0.998922	-1.01228
USF2	0.0439078	0.998922	1.0315
CHRM5	0.044006	0.998922	1.24121
SMG5	0.0440593	0.998922	-0.524281
LPIN1	0.0440758	0.998922	0.735073
SNCA	0.0441847	0.998922	1.39871
ZNF331	0.0442595	0.998922	-0.5274
IGSF1	0.0443552	0.998922	-1.10215
LHCGR	0.0443989	0.998922	-0.673399
SIAH2	0.0444293	0.998922	0.920121
OR2F1 /// OR2F2	0.0444973	0.998922	-0.574237
GIF	0.0445385	0.998922	0.819567
CASP7	0.0446722	0.998922	0.730706
RAB30	0.0446749	0.998922	0.658658
PLOD1	0.0447041	0.998922	0.529255
PRDM4	0.0447206	0.998922	-0.601107
GNS	0.0448764	0.998922	0.702021
CDK10	0.0450832	0.998922	0.481887
LOC100134822 /// LOC100288069 /// LOC100996442 /// LOC101927270 /// LOC101928344 /// LOC101928670 /// LOC101929540 /// LOC102724409	0.0451572	0.998922	-0.585738
COTL1	0.0451654	0.998922	-0.871427
SMPD3	0.0452031	0.998922	-1.33391
SPICE1	0.0452666	0.998922	0.714099
FAM13B	0.045292	0.998922	-0.483962
IFNA5 /// IFNA6	0.0453681	0.998922	0.79374
MIIP	0.0453939	0.998922	0.625447
NME3	0.0454188	0.998922	-1.04399
VAX2	0.0455277	0.998922	0.646317
CXCL9	0.0455383	0.998922	0.798326
SLC44A4	0.0455682	0.998922	-0.895459
ASXL2	0.0455768	0.998922	-0.861722
MPC2	0.0456493	0.998922	0.442275
TEX40	0.0457041	0.998922	-1.30408
TAS2R7	0.045748	0.998922	0.680425
ARSJ	0.0457785	0.998922	0.762447
TBC1D22A	0.0457944	0.998922	-0.511359
SF3B1	0.0458418	0.998922	-1.00165
RNF187	0.0458622	0.998922	0.57896
VTCN1	0.0462192	0.998922	1.42578
EDN1	0.0463092	0.998922	-0.877517
BC069756	0.0463932	0.998922	0.893119
USP6NL /// USP6NL-IT1	0.0464788	0.998922	-0.612249
FOXN2	0.0465786	0.998922	-2.11745
NPEPL1	0.0466324	0.998922	0.602195
INSL3	0.0467653	0.998922	-0.607314
PSG11	0.0468753	0.998922	1.13679
PDE6B	0.0469316	0.998922	0.743233
ATP5G2	0.0471442	0.998922	-0.73172
ISCA1	0.0472121	0.998922	1.32253
LMO1	0.0473053	0.998922	0.739061
LMNB1	0.0473174	0.998922	0.575378
MVD	0.0475222	0.998922	0.883363
PRO2214	0.0475948	0.998922	-0.736706
ALDH1A1	0.0476513	0.998922	-0.682481
MIR6516 /// SCARNA16 /// SNHG20	0.0480655	0.998922	-0.644414
LILRA3	0.0481082	0.998922	1.50515
ADCK2	0.0481655	0.998922	-0.446521
CCL3 /// CCL3L1 /// CCL3L3	0.0482758	0.998922	1.01364
TMEM50A	0.0483371	0.998922	0.665729
GSPT1	0.0483745	0.998922	1.1622
SPP1	0.0483814	0.998922	-0.840834
SFRP1	0.0484156	0.998922	0.583913
GPR25	0.0484671	0.998922	0.437634
ACP6	0.0485585	0.998922	1.03225
KPTN	0.0486554	0.998922	0.854441
SERPINA10	0.0489539	0.998922	-0.75345
FAM102A	0.048962	0.998922	0.779516
AP1G1	0.0490074	0.998922	-1.14389
PCDH8	0.04905	0.998922	-0.715771
CYP2A13	0.0492733	0.998922	0.853853
QTRTD1	0.049353	0.998922	0.575252
MPZL2	0.0495612	0.998922	0.427229
BFSP1	0.0495795	0.998922	-0.588225
C11orf68	0.0496731	0.998922	-1.00995
C14orf132	0.0496956	0.998922	-1.22653
DAB2 /// LOC101926921	0.0498368	0.998922	-0.661704
CXCR2	0.0499009	0.998922	-0.914854
SMAD7	0.0499846	0.998922	-0.566568
POLM	0.0500385	0.998922	-0.725945
NAALAD2	0.0500523	0.998922	0.64831
MRAS	0.0502288	0.998922	0.601561
DICER1	0.0503279	0.998922	-0.641287
LTBP3	0.0503287	0.998922	-1.07715
MEIS3P1	0.0503805	0.998922	-0.451444
RBM38	0.0504055	0.998922	0.791413
BST1	0.0504513	0.998922	0.541105
RBM12B	0.0505623	0.998922	-0.789737
SIPA1L1	0.050764	0.998922	-0.725638
CAMK1	0.05087	0.998922	-0.916049
FCHO1	0.050871	0.998922	-1.02156
NCF2	0.0508748	0.998922	-1.14693
DNAJC11	0.0509459	0.998922	0.905948
TBC1D5	0.0509655	0.998922	-0.502531
ZNF468	0.0510665	0.998922	0.681482
DCUN1D1	0.0511266	0.998922	0.944108
PEX10	0.0512849	0.998922	0.723855
MIR612 /// NEAT1	0.0513434	0.998922	0.548466
NUDT4 /// NUDT4P1 /// NUDT4P2	0.0513976	0.998922	0.922952
MRPS15	0.0515538	0.998922	-0.761007
ESD	0.0516851	0.998922	-0.875435
IL6ST	0.0516935	0.998922	-0.560673
CLDN11	0.0518059	0.998922	-0.947718
FLRT1	0.0518073	0.998922	0.619348
CTIF	0.051859	0.998922	-0.834034
PABPC1 /// RLIM	0.0519514	0.998922	-0.574558
THOP1	0.0519582	0.998922	0.817603
SLC27A3	0.0519974	0.998922	-0.863191
THNSL1	0.0521163	0.998922	0.607781
LOC100293211	0.0522389	0.998922	0.853518
NGLY1	0.0522666	0.998922	-0.815897
CTSL	0.0524345	0.998922	0.969679
NDUFC1	0.0524498	0.998922	-1.56145
TACR2	0.0524616	0.998922	0.624797
RP11-82L18.2	0.0525066	0.998922	1.37725
ZC3H14	0.052522	0.998922	-0.694625
ETNPPL	0.0525496	0.998922	-0.71875
BCAS2	0.0526052	0.998922	0.776876
CAPG	0.0526355	0.998922	-0.588544
HCG4	0.0527092	0.998922	-0.562345
CCT4	0.0527665	0.998922	-0.959427
ZNF536	0.0529263	0.998922	-0.681198
DDX21	0.052989	0.998922	1.23802
MECR	0.0530779	0.998922	0.720827
ANXA11	0.0532383	0.998922	-0.698641
LOC101929777 /// WNT3	0.0532824	0.998922	-0.620964
FLJ42627	0.0533657	0.998922	0.542905
TUBG2	0.0535112	0.998922	0.718999
HBG1 /// HBG2	0.0535984	0.998922	0.882251
RAB40AL	0.0536902	0.998922	0.830025
BCL2A1	0.0537209	0.998922	1.37214
RPS6KA5	0.0537648	0.998922	-0.855665
HS3ST3B1	0.0538223	0.998922	-0.702983
RUFY3	0.0538431	0.998922	-0.447336
CCDC92	0.0538674	0.998922	-0.482101
SIT1	0.0539581	0.998922	0.761603
SPOCK1	0.0539925	0.998922	0.996592
LRRC3	0.0541689	0.998922	0.552881
ELP3	0.0542135	0.998922	0.644447
IL13	0.0542449	0.998922	1.02425
PTEN /// PTENP1	0.0542621	0.998922	-0.52278
BANF1	0.0543316	0.998922	0.613693
ABCD1P2 /// ABCD1P2	0.054348	0.998922	0.776164
S100A13	0.0544732	0.998922	-0.777342
C10orf88	0.0545643	0.998922	0.674976
JUN	0.0546543	0.998922	0.528844
ANKLE2	0.0548442	0.998922	-0.480322
TSEN34	0.0550053	0.998922	-0.728097
TREM1	0.0551392	0.998922	-0.709589
P2RY10	0.0553589	0.998922	-0.575827
RP11-649A18.7	0.0554013	0.998922	0.48894
MAPK8	0.0554016	0.998922	0.521989
PLA2G1B	0.0555771	0.998922	0.546639
LOC101930405	0.0556485	0.998922	1.03611
ZMYM2	0.0556825	0.998922	-0.466271
SLC24A2	0.0559406	0.998922	0.944148
PGAP3	0.0560685	0.998922	-0.468792
CD1E	0.0560846	0.998922	0.665624
RABL3	0.0561668	0.998922	-0.993883
TES	0.0561681	0.998922	-0.558227
BCL2L2-PABPN1 /// PABPN1	0.0561996	0.998922	0.616186
PDZD2	0.0563309	0.998922	-0.4844
UBE2Z	0.0564415	0.998922	0.684024
DDX3Y	0.0564643	0.998922	-1.48067
TLN2	0.0564687	0.998922	0.770219
HMBS	0.0564921	0.998922	1.02247
LINC00965	0.0564972	0.998922	-0.749527
CRYBB2 /// CRYBB2P1	0.056619	0.998922	0.698238
AMFR	0.0567634	0.998922	0.781617
PHEX	0.0567728	0.998922	0.818224
LINC00652	0.0567807	0.998922	-0.774345
MYBL1	0.0568424	0.998922	-0.849027
DUX1 /// DUX3 /// DUX5	0.0569174	0.998922	0.462366
F10	0.0569379	0.998922	-0.644913
CDK4	0.0571049	0.998922	0.708358
IDUA	0.0572444	0.998922	0.377975
DNAJC17	0.0573781	0.998922	0.577371
EGLN2 /// RAB4B-EGLN2	0.0573833	0.998922	-0.797748
CBLC	0.0573843	0.998922	0.396907
CEACAM6	0.0574017	0.998922	1.10148
S100A12	0.0574968	0.998922	0.756845
MYL4	0.0575971	0.998922	0.858889
2002-03-01	0.0576709	0.998922	0.790867
COCH	0.0577182	0.998922	-0.61627
CD22	0.0577262	0.998922	-0.538005
CXCR6	0.0579019	0.998922	0.578378
LOC101928104	0.0579505	0.998922	0.44171
FAM105A	0.0580782	0.998922	-0.475635
ARL14	0.0582434	0.998922	0.460236
PSMD7	0.0583936	0.998922	-0.811195
SLC16A7	0.0584718	0.998922	-0.862352
NBPF10 /// NBPF11 /// NBPF12 /// NBPF14 /// NBPF15 /// NBPF20 /// NBPF8 /// NBPF9	0.0584719	0.998922	-0.779703
AHCYL2	0.0585046	0.998922	-0.807047
PIAS1	0.0587183	0.998922	-0.558979
TXNIP	0.0588214	0.998922	-1.09082
EPB42	0.058839	0.998922	1.2973
GJB1	0.0590666	0.998922	0.896127
TANK	0.0593269	0.998922	-0.472125
FNBP4	0.0593364	0.998922	-1.15509
C3AR1	0.0593438	0.998922	-1.16942
DNAJC12	0.0593823	0.998922	-0.927959
PPP1R11	0.0594726	0.998922	0.609559
OR10H1	0.0595761	0.998922	0.712062
BCAP29	0.0596142	0.998922	0.86906
TSPAN14	0.0599171	0.998922	1.0537
ATXN1	0.0600526	0.998922	-0.656081
LMBR1L	0.0600943	0.998922	0.872355
SMR3A /// SMR3B	0.0601242	0.998922	0.558688
GYPA	0.0602042	0.998922	0.869329
MAP3K14	0.060352	0.998922	-1.08251
RP1-6P5.2	0.0604276	0.998922	-0.699386
PKNOX1	0.0607928	0.998922	-0.466604
RARA	0.0608277	0.998922	-0.590796
TRPM8	0.0608445	0.998922	0.593054
DEFA4	0.0608977	0.998922	2.23626
L2HGDH	0.0609139	0.998922	-0.487943
MYL10	0.0609445	0.998922	-0.571852
WWP1	0.060958	0.998922	-0.590131
PLK2	0.0612458	0.998922	0.437284
RRH	0.0613151	0.998922	-0.663829
CTNNB1	0.0614385	0.998922	1.23617
AVPI1	0.0614494	0.998922	0.60493
KLF6	0.061513	0.998922	-0.831725
TFAP2A	0.0616266	0.998922	0.428049
BICD1	0.0616866	0.998922	-0.555246
PTPN22	0.0617449	0.998922	-0.463329
CYLC2	0.0619524	0.998922	-0.532704
ZBTB44	0.062068	0.998922	-0.884359
GFOD1	0.0622096	0.998922	-0.940021
GS1-111G14.1	0.0622879	0.998922	-1.81851
MUC2	0.0623219	0.998922	-0.96211
NOTCH2NL	0.0624326	0.998922	-1.24721
SKIV2L	0.0624421	0.998922	-0.471371
ID3	0.0624482	0.998922	-0.904026
SUPT16H	0.0624897	0.998922	0.72284
L1TD1	0.0624942	0.998922	-0.919979
DRICH1	0.0625612	0.998922	0.888903
ZNF33B	0.0625784	0.998922	-0.685907
CCDC176	0.0625804	0.998922	1.08394
FAHD2A	0.062588	0.998922	-0.738236
NEB	0.0626439	0.998922	-0.447782
PDLIM1	0.0626827	0.998922	-0.832988
ABI1	0.062764	0.998922	-0.56625
IL13RA1	0.0629258	0.998922	-0.480022
CEP104	0.0630567	0.998922	0.508278
ANXA1	0.0631226	0.998922	-0.609102
KDM5D	0.063227	0.998922	-1.92491
SOX5P /// SOX5P	0.0633618	0.998922	-0.719059
GPC4	0.0635986	0.998922	-0.51794
TRAP1	0.0636365	0.998922	0.615108
TRAPPC8	0.0636744	0.998922	-0.661343
ALCAM	0.063696	0.998922	-0.681095
ADIPOR1	0.0637595	0.998922	0.952075
SCARF1	0.0639112	0.998922	0.608667
MED23	0.063953	0.998922	-0.57544
HSPB6	0.0640043	0.998922	1.01836
ATRNL1	0.0641167	0.998922	-0.611356
CYP3A4	0.064162	0.998922	-0.40541
B3GNT1	0.0642666	0.998922	0.701998
CYB5R4	0.0643475	0.998922	-0.555977
NPPA	0.0645252	0.998922	0.719853
GPR20	0.0646449	0.998922	-0.90403
DYM	0.0648928	0.998922	-0.545702
PRB1	0.0649273	0.998922	0.950867
TTF1	0.0649461	0.998922	-0.440341
DCAF13	0.0652529	0.998922	-0.545438
INPP1	0.0653972	0.998922	-0.602553
GTPBP6	0.0654013	0.998922	-0.684613
CRADD	0.0655961	0.998922	0.505579
GUK1	0.0656727	0.998922	0.714739
CDX4	0.0657323	0.998922	-0.642129
PRG2	0.065763	0.998922	1.44056
EHBP1	0.0658597	0.998922	-0.387383
MYL1	0.0659139	0.998922	0.754062
OSGIN2	0.0659799	0.998922	0.460014
ALOX15B	0.0660332	0.998922	1.14666
SFI1	0.066043	0.998922	-0.579519
SGSM3	0.0661144	0.998922	0.46499
NPM1P22 /// NPM1P22	0.0661437	0.998922	1.12021
SPTB	0.0662502	0.998922	0.529802
ZRSR2	0.0663035	0.998922	0.502794
SPTBN2	0.0663509	0.998922	-0.742675
MIR6890 /// QARS	0.066382	0.998922	-0.668248
SLC27A2	0.0666317	0.998922	0.521397
CD207	0.066646	0.998922	0.697227
ECE1	0.0667785	0.998922	0.532421
MYL12A /// MYL12B	0.0669297	0.998922	-0.656245
RNF11	0.0670062	0.998922	0.953449
SNORA5B /// TBRG4	0.0671484	0.998922	1.19268
XPNPEP1	0.0672087	0.998922	-0.686967
IL25	0.0672356	0.998922	1.10042
FLT3LG	0.0673178	0.998922	-0.804505
CASQ2	0.0673879	0.998922	0.494713
WNT11	0.0674965	0.998922	0.64078
PROSC	0.0675444	0.998922	-0.429364
SLC12A7	0.0676069	0.998922	0.826915
PPP4C	0.0677224	0.998922	-1.00746
HGH1	0.0677393	0.998922	0.78244
MYT1L	0.0677537	0.998922	-0.379127
CARD9 /// DNLZ	0.0680424	0.998922	-0.697417
SAP30BP	0.0682808	0.998922	-0.6529
OR1F1	0.0683316	0.998922	0.650814
LAMC3	0.0684035	0.998922	-0.993936
KXD1	0.0684347	0.998922	-0.504956
IL6	0.0685026	0.998922	0.732573
DKFZP434L187	0.0686069	0.998922	0.508555
CKS2	0.0687982	0.998922	1.11616
SLC25A11	0.068945	0.998922	0.544291
RHBDF2	0.06896	0.998922	0.463586
ATG9A	0.0689669	0.998922	0.849037
CHAC1	0.0690301	0.998922	0.862273
FOXO1	0.0692294	0.998922	0.72912
C8orf44-SGK3 /// SGK3	0.0695407	0.998922	-0.684314
FAM120A	0.069692	0.998922	-0.412667
INTS6	0.0697094	0.998922	-0.507174
PPIP5K1	0.069771	0.998922	0.594986
QTRT1	0.0697856	0.998922	0.468991
NCAPD2	0.0698911	0.998922	-0.881844
CTNNBIP1	0.0699392	0.998922	0.871352
TMEM143	0.0701312	0.998922	-0.825853
FAM162A	0.0701451	0.998922	-0.646608
DIO3	0.0701709	0.998922	-0.715235
ARHGAP26	0.0704237	0.998922	-0.58574
PLSCR3 /// TMEM256-PLSCR3	0.0704653	0.998922	-0.593715
GRB10	0.070708	0.998922	-0.636018
ZC2HC1C	0.070712	0.998922	-0.552555
ALDH9A1	0.0708555	0.998922	0.532459
ZMYM4	0.0710467	0.998922	-0.440419
NXN	0.071139	0.998922	0.866403
FAM168A	0.0712338	0.998922	0.511792
OSBP2	0.0712645	0.998922	0.961757
SYNGR2	0.0715179	0.998922	-0.805748
TNXA /// TNXB	0.0715919	0.998922	0.372852
CEBPA	0.0716497	0.998922	0.605799
BIN3	0.0717097	0.998922	-0.531563
SPHK1	0.0719069	0.998922	0.944368
RP1-68D18.4	0.0719282	0.998922	0.863071
BICD2	0.0720035	0.998922	-0.642252
C16orf95	0.0720493	0.998922	0.521672
OSGIN1	0.0720808	0.998922	0.623585
TBC1D12	0.0721642	0.998922	0.661004
WDR4	0.0721838	0.998922	-0.542906
PAGE1	0.0722373	0.998922	0.563351
TCAP	0.0723991	0.998922	-0.656222
ZNF140	0.0725053	0.998922	-0.63548
TUBB2A	0.0725096	0.998922	1.99991
SHMT1	0.0728037	0.998922	-0.598817
PLA1A	0.0729815	0.998922	0.725906
TLR1	0.0730311	0.998922	-0.585446
GP1BA	0.0730553	0.998922	0.704977
PLXNA1	0.0730765	0.998922	-0.502066
RAG1	0.0731256	0.998922	-0.72014
GDF9	0.0732072	0.998922	-0.734971
GTF2B	0.0732401	0.998922	-0.986019
SDK2	0.0733176	0.998922	-0.558952
ANXA4	0.07333	0.998922	-0.774327
FAM186A	0.0733419	0.998922	0.554379
NRIP2	0.0734438	0.998922	0.862053
HERC3 /// LOC101929134	0.0734678	0.998922	-0.711417
ATP13A3	0.0736238	0.998922	-0.578073
KIR3DS1	0.0736449	0.998922	0.92197
SIK2	0.0737084	0.998922	-0.465349
SLIT3	0.073779	0.998922	0.472775
RIT1	0.0738683	0.998922	0.438673
TJP2	0.073875	0.998922	-0.534635
HIST1H1C	0.0740346	0.998922	1.03005
ATG3	0.0741201	0.998922	0.539473
TNFRSF1A	0.0741594	0.998922	-1.20185
F2RL2	0.0743206	0.998922	-0.900767
MGAT4B	0.0743235	0.998922	-0.598317
BCAS4	0.0745516	0.998922	0.746824
BNIP1	0.0745587	0.998922	0.636051
ZNF204P	0.0745714	0.998922	-0.625961
ARPC4	0.07458	0.998922	0.690878
PNPLA2	0.074795	0.998922	0.890368
STAB1	0.0748517	0.998922	0.518816
TBL1X	0.074882	0.998922	-0.668003
LYPLA1	0.0751117	0.998922	-0.501979
MTMR10	0.0751896	0.998922	-0.717214
PTPRN2	0.0752205	0.998922	-0.388771
PDE1B	0.075234	0.998922	-0.364552
GFM1	0.0753185	0.998922	0.813737
ECHDC3	0.0753758	0.998922	-0.720804
RPL19	0.0753959	0.998922	-0.712051
GPR183	0.0754776	0.998922	-0.620249
CCDC68	0.07548	0.998922	0.674211
PECAM1	0.0756894	0.998922	-0.632365
U2AF2	0.0757586	0.998922	0.509499
LYST	0.0757929	0.998922	-0.632575
MREG	0.0758706	0.998922	-0.432087
PCOLCE	0.0759976	0.998922	-0.578281
RELA	0.0760002	0.998922	0.551012
TDP2	0.0760598	0.998922	-0.643547
TLE4	0.0762194	0.998922	-0.447152
RNF123	0.076326	0.998922	0.864585
S1PR4	0.0763297	0.998922	-0.674889
ALS2CL	0.0763598	0.998922	0.730623
REEP2	0.076436	0.998922	0.631711
CYP4F3	0.076443	0.998922	0.887321
OGFR	0.0764956	0.998922	0.490902
HCRT	0.0765572	0.998922	0.730202
SCD5	0.076576	0.998922	-0.859837
GMEB2	0.0765887	0.998922	-0.543541
NCLN	0.0766207	0.998922	-0.451875
PKN2	0.0766471	0.998922	-0.621121
CLEC4A	0.0766701	0.998922	-0.970445
BCAS1	0.0768214	0.998922	0.776093
HCRP1	0.0769581	0.998922	-0.425833
ZNF12	0.0769726	0.998922	-0.496929
CALR	0.077004	0.998922	0.660501
ZNF16	0.0770143	0.998922	0.562677
GCLC	0.0770629	0.998922	1.08609
LDLRAP1	0.0772564	0.998922	-0.855829
CD47	0.0772655	0.998922	-0.479406
CD9	0.0772821	0.998922	-1.25623
POU2F2	0.0775351	0.998922	0.697364
PIGN	0.0775379	0.998922	-0.535717
LRP1	0.0775446	0.998922	0.550805
GTF2A1L /// STON1-GTF2A1L	0.0776503	0.998922	-0.355082
EPYC	0.0776819	0.998922	0.472651
CTC-425F1.4	0.0777857	0.998922	-1.12885
BFSP2	0.0778104	0.998922	0.749015
PARVA	0.077904	0.998922	0.384137
TEX30	0.0779735	0.998922	-0.621461
CCL4	0.0780535	0.998922	0.835603
GAGE1	0.0780607	0.998922	1.02344
S100A7	0.0781481	0.998922	0.721459
SLC28A2	0.0782178	0.998922	-0.643314
YLPM1	0.0782428	0.998922	0.455804
ELANE	0.0782741	0.998922	1.98284
CD72	0.0783969	0.998922	0.590335
ABCA11P	0.0784663	0.998922	-0.720172
UBQLN2	0.0786122	0.998922	-0.649528
RPL3L	0.078651	0.998922	0.868511
GJC1	0.0788699	0.998922	-0.792247
PMPCA	0.078879	0.998922	-0.514739
VTI1B	0.0790126	0.998922	0.84787
NF2	0.0790228	0.998922	0.33334
CIT /// MIR1178	0.0791555	0.998922	0.51215
WIPF1	0.079285	0.998922	-0.480459
THOC6	0.0793387	0.998922	0.545125
SH3BGRL	0.0793769	0.998922	-0.630018
OR2F1	0.0793911	0.998922	-0.932777
LECT1	0.0794053	0.998922	0.892324
NAT2	0.0795401	0.998922	0.316477
AOC1	0.0796	0.998922	-0.872309
FOXN3-AS2	0.0796333	0.998922	0.644028
TCP10	0.0796786	0.998922	-0.820975
AHCY	0.0798161	0.998922	0.49648
MBNL1	0.0798167	0.998922	-0.470223
ECRP	0.0798747	0.998922	-1.86522
LOC102725271 /// NTM	0.0799484	0.998922	0.429346
MAFF	0.0800276	0.998922	0.787744
PRPF40A	0.0800474	0.998922	-0.501136
HMGXB3	0.0800734	0.998922	0.890376
SCRN3	0.0801173	0.998922	-0.452418
TUFT1	0.0803271	0.998922	-0.738478
URB2	0.0805561	0.998922	-0.666824
KIAA0753	0.0806408	0.998922	-0.817773
LDB1	0.0808952	0.998922	-0.49767
CUL9	0.0810117	0.998922	0.553028
SERTAD3	0.0811516	0.998922	0.77717
LOC145783 /// ZNF280D	0.0812962	0.998922	-0.659776
KCNQ3	0.0813985	0.998922	-0.851708
SLC29A1	0.0814368	0.998922	-0.7575
RNF126P1	0.0816205	0.998922	-0.502501
PAX3	0.0816348	0.998922	0.482963
FFAR3 /// GPR42	0.0816635	0.998922	0.481095
RNF39	0.0816982	0.998922	0.695961
UNC119	0.0817309	0.998922	-1.08532
TMEM131	0.0817684	0.998922	-0.708715
FBXW12	0.0818269	0.998922	-0.867778
ZNF528	0.0818459	0.998922	-0.837002
PADI2	0.0820932	0.998922	0.831374
WAPAL	0.0821497	0.998922	-0.425192
GORASP1	0.0823795	0.998922	0.682778
CCDC94	0.0824007	0.998922	0.451681
TBX19	0.0824771	0.998922	1.07734
SLC15A2	0.0826969	0.998922	-0.480374
SON	0.082708	0.998922	-0.61823
LPGAT1	0.0827856	0.998922	-0.597431
PLEKHG3	0.0830556	0.998922	-0.667502
EIF1AY	0.0830811	0.998922	-1.28037
TMEM45A	0.0832486	0.998922	0.550785
MDM4	0.0832737	0.998922	-0.970076
SIK1	0.0835304	0.998922	0.604972
SMR3A	0.0836031	0.998922	-0.583399
ALOX12	0.0836561	0.998922	-0.677274
MAGEH1	0.0837489	0.998922	0.938971
HIST1H4G	0.0837741	0.998922	0.413485
ARFGEF2	0.0838598	0.998922	-0.381402
SPOP	0.0839859	0.998922	-0.604173
UBASH3A	0.0841845	0.998922	-0.667974
CREBL2	0.0843789	0.998922	-0.474846
RHOA	0.0845222	0.998922	-0.51527
CNOT6	0.0846796	0.998922	-0.511149
MXD3	0.0847285	0.998922	-0.420025
TGIF2	0.0847486	0.998922	-0.531558
USP32	0.0847554	0.998922	0.428198
TPM1	0.0848065	0.998922	0.604765
EPRS	0.0851732	0.998922	-0.38975
CTSC	0.0852099	0.998922	-0.653426
PEX26	0.0852227	0.998922	0.463163
CALHM2	0.0852445	0.998922	-0.782375
SLC35E2 /// SLC35E2B	0.0852785	0.998922	-0.573057
EDA2R	0.0853718	0.998922	-0.96819
RAB8B	0.0854397	0.998922	0.506458
PTER	0.0854423	0.998922	-0.624363
UCP2	0.0854814	0.998922	0.638038
BACE2	0.0856495	0.998922	-0.984829
MYOM2	0.0857748	0.998922	-1.42155
CSF2RB	0.0858297	0.998922	-0.661309
STMN1	0.085906	0.998922	0.544724
CYP46A1	0.0859116	0.998922	-0.864529
DYNC1I1	0.085917	0.998922	0.79784
PALMD	0.0860434	0.998922	0.59676
F11R	0.0860506	0.998922	-0.781909
ERP44	0.0864071	0.998922	-0.423379
MSL2	0.0864982	0.998922	0.835638
F2R	0.0865638	0.998922	-0.537118
MRPL48	0.0865967	0.998922	-1.0749
Y16709	0.0866167	0.998922	-1.19081
ADK	0.0867124	0.998922	-0.596752
HMGN1 /// LOC101927733	0.0867433	0.998922	0.442057
SHPK	0.0867536	0.998922	0.583422
DEFA6	0.0868187	0.998922	-0.358285
LOC100652777 /// PLA2G10	0.0868237	0.998922	-0.694267
ADAM20	0.0870084	0.998922	-0.344609
TSPY1	0.0870186	0.998922	0.726975
BCL2L2	0.0870507	0.998922	-0.482059
USP25	0.0870601	0.998922	-0.528659
CUEDC1	0.0871552	0.998922	-0.452198
RASSF1	0.0873458	0.998922	-0.512206
ZNF266	0.0873751	0.998922	0.534308
AHR	0.0875657	0.998922	-0.595769
PTHLH	0.0877207	0.998922	-0.323646
ARID4A	0.0877828	0.998922	-0.63921
NLRP1	0.0878534	0.998922	-0.526089
LIG4	0.0878553	0.998922	-0.545265
BCL7C	0.0879624	0.998922	-0.753224
WWC3	0.0879846	0.998922	0.634073
ITIH5	0.0880222	0.998922	0.718093
STK4	0.0880495	0.998922	-0.585524
MPZ	0.0880524	0.998922	1.14179
TRA2A	0.0881581	0.998922	-0.585368
ZNF335	0.0881718	0.998922	0.362898
LY6G6D /// LY6G6F	0.0882582	0.998922	-0.901849
HIRA	0.0882913	0.998922	0.838171
CXorf56	0.0883089	0.998922	0.534744
SH3BP4	0.088507	0.998922	0.610338
GLRB	0.0885558	0.998922	-0.500429
PPP1CA	0.0885875	0.998922	-0.804566
GPR22	0.0885916	0.998922	0.343275
DLGAP2	0.0886282	0.998922	-0.493786
IQCC	0.0886522	0.998922	0.716536
ELL2P3 /// ELL2P3	0.0886713	0.998922	0.62311
RNASE3	0.0887697	0.998922	-1.55605
HDLBP	0.0888773	0.998922	-0.569026
KIAA1279	0.0889202	0.998922	-0.436352
IKZF4	0.088993	0.998922	0.54638
LOC100507472 /// PCSK6	0.0891935	0.998922	0.60834
RALA	0.089242	0.998922	-0.635478
GPR137	0.0892764	0.998922	0.40913
CYP11A1	0.089371	0.998922	-0.701245
RPS6KB2	0.0894831	0.998922	0.621784
CCDC30	0.0896329	0.998922	0.678768
CST1	0.0896755	0.998922	0.740269
KRT18P38 /// KRT18P38	0.0897928	0.998922	0.768671
OR1E3 /// OR1E3	0.0898695	0.998922	0.623558
ORC3	0.0899389	0.998922	-0.537832
SWAP70	0.0899397	0.998922	-0.421949
DROSHA	0.0899478	0.998922	-0.533823
ARL6IP5	0.0900107	0.998922	-0.493703
TMEM208	0.0900784	0.998922	0.542056
KIAA1107	0.0900918	0.998922	0.511464
MYD88	0.0901438	0.998922	-0.519603
LOC100294145	0.0901459	0.998922	-0.665755
AIRE	0.0903027	0.998922	-0.509654
COQ3	0.0903044	0.998922	-0.926419
PSAT1	0.0903398	0.998922	0.62804
NBPF10 /// NBPF11 /// NBPF14 /// NBPF15 /// NBPF19 /// NBPF20 /// NBPF25P /// NBPF26 /// NBPF8 /// NBPF9	0.0903674	0.998922	-0.552781
CHEK1	0.090438	0.998922	0.392996
IGF1R	0.0905345	0.998922	-0.700689
FMR1	0.0905349	0.998922	-0.559977
LRFN3	0.0906013	0.998922	-0.522326
NPC1L1	0.0906096	0.998922	0.725808
ACVR2B-AS1	0.0906636	0.998922	-0.99189
ECI1	0.0907027	0.998922	-0.787392
GADD45G	0.0908649	0.998922	-0.897827
RNF41	0.0909598	0.998922	-0.674234
PDIA4	0.0910313	0.998922	0.587034
DPT	0.091066	0.998922	0.33137
ASB9	0.0911417	0.998922	0.551797
LOC102725072 /// LOC102725315 /// LOC727983 /// POM121L10P /// POM121L1P /// POM121L4P /// POM121L8P /// POM121L9P	0.0911516	0.998922	0.527817
METAP1	0.0912095	0.998922	-0.418939
XK	0.0913805	0.998922	1.07653
COX7A1	0.091521	0.998922	0.619774
PRG3	0.0915809	0.998922	0.923033
SERGEF	0.0916802	0.998922	-0.804611
AREG	0.0917361	0.998922	0.374006
TMED9	0.0917658	0.998922	0.446423
SLC7A5	0.0918421	0.998922	1.03013
MYL6	0.0918582	0.998922	0.631343
DNAJA1P4 /// DNAJA1P4	0.0920061	0.998922	0.72531
MYBBP1A	0.0920339	0.998922	0.823942
DOLPP1	0.0920513	0.998922	0.530931
FAM204A	0.0921154	0.998922	-0.52852
AC007967.3 /// RBMY2TP /// RBMY2TP	0.0922724	0.998922	0.965169
BORA	0.0924607	0.998922	0.478062
MC3R	0.0924691	0.998922	0.546272
OGFOD2	0.0925388	0.998922	0.503779
ACSL6	0.092735	0.998922	0.415897
NRIP1	0.0928444	0.998922	-0.728524
ZGPAT	0.0929454	0.998922	-0.773937
NKTR	0.0929659	0.998922	-0.412688
BYSL	0.0929966	0.998922	0.785691
HIPK2	0.0930535	0.998922	0.681796
PSMA7	0.0934111	0.998922	-0.99863
HADHA	0.0934979	0.998922	-0.550513
LPCAT3 /// U47924.30	0.0935451	0.998922	0.533585
MISP	0.0936214	0.998922	0.848748
C9orf78	0.0937465	0.998922	1.09848
CABP2	0.0939178	0.998922	0.370984
RGS17	0.0939259	0.998922	0.541606
NOL11	0.0941263	0.998922	-0.426286
TAL1	0.0941529	0.998922	0.430959
ACVR1	0.0942518	0.998922	-0.406931
IFNA16	0.0942848	0.998922	0.493632
CISD1	0.0946816	0.998922	0.669182
CLEC1A	0.0947784	0.998922	0.881227
FAM98A	0.0948345	0.998922	0.721804
ACTR8	0.0948526	0.998922	-0.420796
DDX54	0.0948544	0.998922	0.568882
GTF2H1	0.0949448	0.998922	-0.498877
ATP1B2	0.095116	0.998922	1.08407
GDI1	0.0951364	0.998922	0.630134
SPATA1	0.0954532	0.998922	0.398969
TMEM134	0.0954745	0.998922	-0.662753
PAX4	0.0954874	0.998922	0.36739
ATG12	0.0956522	0.998922	-0.373112
BTG1	0.0958782	0.998922	-0.609973
PLXDC1	0.0959623	0.998922	-0.434452
SDHA	0.0959796	0.998922	0.630594
MYH6	0.096039	0.998922	0.712826
ZSCAN5A	0.0962607	0.998922	0.594117
DUOX1	0.0963111	0.998922	0.575592
MTMR9	0.0963246	0.998922	0.482456
LDHAL6B	0.0963443	0.998922	0.807663
RNASE4	0.0963818	0.998922	0.525028
ACP1	0.0964458	0.998922	0.679409
SEC24B	0.0964984	0.998922	-0.61789
TMEM184C	0.0966168	0.998922	0.453752
PTOV1	0.0966691	0.998922	-0.84327
HOXB5	0.0967061	0.998922	0.41184
ASB13	0.0967572	0.998922	1.09682
ZMYM5	0.096811	0.998922	0.454976
DAG1	0.0968736	0.998922	0.723161
E2F3	0.0969781	0.998922	-0.511816
CLN6	0.0970886	0.998922	0.363002
ENTPD3	0.0971168	0.998922	0.506689
LARP4B	0.0971895	0.998922	-0.32598
TRMT11	0.0972062	0.998922	-0.523396
PRODH2	0.0973006	0.998922	-1.1011
DCLK2	0.0974995	0.998922	0.559303
HLA-DQA1	0.0975036	0.998922	-1.726
SIN3B	0.0975923	0.998922	-0.385472
ELL2	0.0976017	0.998922	-0.463996
ST8SIA5	0.0976251	0.998922	0.589729
SERINC2	0.0976853	0.998922	0.448849
CTRB2	0.0977057	0.998922	0.50414
CSNK1G1	0.097721	0.998922	0.417007
NCOA3	0.097767	0.998922	-0.42124
HAGH	0.0978637	0.998922	0.677178
DDI2 /// RSC1A1	0.0978892	0.998922	0.72652
PCDH9	0.0978934	0.998922	-0.483015
GALNT8 /// KCNA6	0.0978949	0.998922	0.941694
PLXNB2	0.0980368	0.998922	-0.772386
ALDH1L1	0.0980596	0.998922	-0.571972
NCS1	0.098063	0.998922	-0.459062
NPEPPS	0.0982731	0.998922	-0.564453
DAPP1	0.0982795	0.998922	-0.608351
SLC31A2	0.0984667	0.998922	-0.69072
CD99	0.098612	0.998922	-0.514712
HSPA2	0.0986396	0.998922	-0.713144
UBBP2 /// UBBP2	0.0986763	0.998922	0.992369
SNHG17	0.0986822	0.998922	0.574848
BCL2L1	0.098748	0.998922	1.20961
VCAM1	0.0988213	0.998922	0.632745
GGT1 /// GGT2 /// GGT3P /// GGTLC1 /// GGTLC2 /// LOC100132705 /// LOC102724197	0.0989299	0.998922	-0.484937
MRPS14	0.0990161	0.998922	0.534755
PRO1483	0.0991641	0.998922	-0.390981
REXO2	0.0992275	0.998922	1.20164
GABRE /// MIR224 /// MIR452	0.099286	0.998922	0.511829
VAPA	0.0992974	0.998922	-0.618339
GSK3B	0.0994053	0.998922	-0.793102
TDO2	0.0996138	0.998922	-0.500764
GHSR	0.0996586	0.998922	0.65043
ZBTB48	0.0997819	0.998922	-0.639809
ARHGEF15	0.0998065	0.998922	0.842268
RNF103	0.099832	0.998922	-0.611015
E2F8	0.100031	0.998922	0.576779
SLC41A3	0.100078	0.998922	0.658153
CEPT1	0.100122	0.998922	0.672883
SLC6A4	0.100172	0.998922	-0.900684
STAU2	0.100308	0.998922	-0.464834
REPS1	0.100343	0.998922	-0.38136
PCDHGB5	0.100364	0.998922	0.9597
UROS	0.10041	0.998922	-0.542904
TFPT	0.100421	0.998922	0.85675
AQP1	0.100438	0.998922	0.528113
SMYD2	0.100454	0.998922	-0.6849
PFKM	0.100474	0.998922	0.514103
NBPF10 /// NBPF12 /// NBPF14 /// NBPF15 /// NBPF20 /// NBPF8 /// NBPF9	0.100488	0.998922	-0.666436
GPRIN2	0.100496	0.998922	-0.689417
ARMC4	0.100622	0.998922	0.821742
ZNF444	0.100808	0.998922	0.558329
CEP70	0.100817	0.998922	-0.697292
RSBN1	0.100818	0.998922	-0.635684
ABHD2	0.100948	0.998922	-0.629183
MKRN3	0.10101	0.998922	0.9643
CA5BP1	0.101183	0.998922	1.04039
IVD	0.101226	0.998922	-0.347237
TYRO3	0.10125	0.998922	0.622298
TCTN2	0.101299	0.998922	-0.493159
LSAMP	0.101312	0.998922	1.5122
DFNA5	0.101451	0.998922	0.449219
FXYD5	0.101683	0.998922	-0.548804
LOC157562	0.101767	0.998922	0.70154
SERPINB2	0.101798	0.998922	-0.771022
NRDE2	0.101898	0.998922	0.420091
DDX24	0.101925	0.998922	-0.507329
ERBB2	0.102119	0.998922	-0.482193
CCR6	0.102553	0.998922	-0.485266
WDR5B	0.102593	0.998922	-0.444165
C15orf49	0.102691	0.998922	0.802562
RPS6KA2	0.102701	0.998922	-0.658907
PPT1	0.102859	0.998922	-0.725719
RP3-507I15.1	0.102946	0.998922	0.866926
CKAP2 /// IGLC1 /// IGLJ2 /// IGLJ2 /// IGLJ3 /// IGLJ3 /// IGLJ3 /// IGLV1-44 /// IGLV2-14 /// IGLV@	0.10298	0.998922	1.13399
ASH1L	0.103119	0.998922	0.574977
NCAPG2	0.103145	0.998922	-0.899512
TCEB3B	0.103158	0.998922	-0.714639
SLC6A8	0.103254	0.998922	0.95596
AOX1	0.10329	0.998922	0.346308
GNG5	0.103295	0.998922	-0.700093
UBC	0.103312	0.998922	-0.570946
SRGAP2 /// SRGAP2B /// SRGAP2C	0.103386	0.998922	-0.635113
KLF12	0.103432	0.998922	-0.463063
PES1	0.103445	0.998922	0.797559
IK /// TMCO6	0.103472	0.998922	-0.824538
PIBF1	0.103502	0.998922	-0.514358
RNASE2	0.10361	0.998922	-1.37748
SEC62	0.103658	0.998922	1.14512
PLA2G16	0.103692	0.998922	0.723026
POLR3K	0.103807	0.998922	0.88194
ASAP3	0.103851	0.998922	-0.607161
POLL	0.103898	0.998922	0.366364
TMEM262	0.10394	0.998922	-0.36572
NAA15	0.104114	0.998922	-0.927748
MTRF1	0.104121	0.998922	-0.547321
GCGR	0.104322	0.998922	0.414602
RRAS	0.104365	0.998922	0.943032
MRPL42	0.104366	0.998922	1.46542
SMIM7	0.104373	0.998922	-0.587994
PADI1	0.104417	0.998922	1.12972
TSGA10	0.104538	0.998922	0.657646
IL5	0.104619	0.998922	-0.38787
SRR	0.104803	0.998922	-0.436629
IGKC /// IGKV2-28 /// IGKV2-28 /// IGKV2D-28 /// IGKV2D-28	0.104935	0.998922	1.10888
ADAM28	0.104992	0.998922	-0.371923
LRCH4 /// SAP25	0.105062	0.998922	0.510797
RP11-54K16.2	0.105067	0.998922	-0.727629
GPSM3	0.105111	0.998922	-0.939629
AP3B2	0.105144	0.998922	-0.532444
PTPLB	0.105157	0.998922	-0.418383
MN1	0.105247	0.998922	-0.687709
NUP107	0.105307	0.998922	0.616532
CA2	0.105319	0.998922	1.36096
PLXNC1	0.105435	0.998922	-0.722507
PTBP3	0.10572	0.998922	-0.47349
ZNF544	0.10577	0.998922	-0.373882
PSORS1C1	0.10599	0.998922	0.713017
TTC23	0.106013	0.998922	-0.484144
ZNF133	0.106164	0.998922	-0.495204
OR1A2	0.106184	0.998922	0.956347
BTG2	0.106221	0.998922	0.477136
KIR3DL1	0.106229	0.998922	0.753338
TM9SF1	0.106307	0.998922	-0.48953
CRELD2	0.106716	0.998922	0.518659
GCH1	0.106758	0.998922	0.650064
NXF2 /// NXF2B	0.106899	0.998922	0.497896
PLA2G2A	0.106969	0.998922	1.17453
GAS2L1	0.107048	0.998922	-0.410985
PSMC1	0.107049	0.998922	-0.511094
FERMT1	0.107059	0.998922	0.447424
ITGA2	0.107099	0.998922	-0.371407
SYNJ2BP /// SYNJ2BP-COX16	0.107115	0.998922	-0.439677
DUSP1	0.10712	0.998922	0.977961
GZMH	0.107276	0.998922	-0.85275
IGFBP3	0.107367	0.998922	0.625984
CEP68	0.107503	0.998922	-0.347843
RABGAP1L	0.107558	0.998922	-0.49648
KCTD7 /// RABGEF1	0.107566	0.998922	-0.553989
BAAT	0.107581	0.998922	0.316829
HNRNPAB	0.107641	0.998922	0.64236
SLC38A2	0.107682	0.998922	-0.646989
PRSS3P2	0.107842	0.998922	0.677091
MMACHC	0.107844	0.998922	0.606137
RAP1GAP	0.10788	0.998922	0.753871
DHRS7	0.107906	0.998922	-0.355109
KIR2DL4	0.107932	0.998922	0.428226
PHKG2	0.10812	0.998922	-0.802265
ALDH2	0.108142	0.998922	-0.505307
TCF25	0.108786	0.998922	-0.344594
MYF5	0.108836	0.998922	-0.448896
FES	0.109033	0.998922	-0.875677
CAPN9	0.10911	0.998922	0.626165
GK	0.109359	0.998922	-0.529278
HK2 /// RP11-259N19.1	0.109366	0.998922	-0.692368
PRKD1	0.109384	0.998922	-0.390756
ADAM11	0.109543	0.998922	0.369297
KIAA0485	0.109707	0.998922	-0.521206
ANKFY1	0.109732	0.998922	-0.592226
MCFD2	0.109847	0.998922	-0.401103
LINC00837	0.109972	0.998922	-0.52962
RASA3	0.109992	0.998922	0.443489
ALG11 /// UTP14C	0.110032	0.998922	-0.382156
GRAMD4	0.110069	0.998922	0.503751
UBBP1 /// UBBP1 /// UBBP4 /// UBBP4	0.110169	0.998922	1.0721
PSRC1	0.110179	0.998922	0.649805
GZMK	0.110306	0.998922	0.846974
RECK	0.110317	0.998922	0.417718
VIPAS39	0.110323	0.998922	-0.443008
CDC27	0.110424	0.998922	0.426235
TFF1	0.110474	0.998922	-0.635121
FARP2	0.110524	0.998922	-0.984772
RPS2 /// SNORA64	0.110789	0.998922	-0.549613
HIST1H4E	0.110811	0.998922	0.53887
CDH15	0.11085	0.998922	-0.463562
ARFIP2	0.110867	0.998922	0.831515
DTX2P1-UPK3BP1-PMS2P11	0.110883	0.998922	-0.477238
CAMK1D	0.110959	0.998922	-0.944453
RPRD2	0.110998	0.998922	-0.887718
SSX2B	0.111082	0.998922	0.703477
HLA-DQB1 /// HLA-DRB1 /// HLA-DRB3 /// HLA-DRB4 /// LOC100996809 /// LOC101060835	0.111107	0.998922	-0.840548
EPHX2	0.11136	0.998922	-0.621659
ITIH2	0.111405	0.998922	0.699455
LOC145678	0.111452	0.998922	0.491884
NIT2	0.11146	0.998922	-0.5822
ZBTB25	0.111472	0.998922	-0.840586
PRRG4	0.111474	0.998922	0.667798
SLC6A2	0.111474	0.998922	0.321575
NOLC1	0.111551	0.998922	-0.487805
DDAH2	0.111582	0.998922	-0.641958
PCGF1	0.111868	0.998922	-0.680758
ZNF606	0.11187	0.998922	-0.458115
PRB3	0.111888	0.998922	-0.440058
DEGS1	0.111935	0.998922	-0.425247
SPATA6L	0.11198	0.998922	-0.588441
CBX7	0.112019	0.998922	-0.663241
BEAN1	0.112226	0.998922	0.505867
KIF11	0.1123	0.998922	0.784655
PSMD1	0.1123	0.998922	-0.410128
PRF1	0.112325	0.998922	0.591586
PYCARD	0.112395	0.998922	-0.919496
LTK	0.112398	0.998922	0.55377
CCDC186	0.112411	0.998922	0.784536
TRAF3IP1	0.112447	0.998922	-0.567287
DAD1	0.112524	0.998922	0.658487
ZNF197	0.112531	0.998922	0.507783
PCBP2	0.112604	0.998922	-0.487339
ROBO3	0.11265	0.998922	-0.544035
IL17RC	0.112787	0.998922	0.53194
BCL3 /// MIR8085	0.113027	0.998922	0.738399
PUF60	0.113034	0.998922	0.627377
WWOX	0.113166	0.998922	0.389019
PI4KB	0.11319	0.998922	-0.598074
FSCN1	0.113197	0.998922	-0.62674
NDUFS1	0.113229	0.998922	-0.445414
CSF1	0.11347	0.998922	-0.415508
SHC1	0.113496	0.998922	-0.487868
CD69	0.113586	0.998922	0.861326
IL11	0.113614	0.998922	0.706303
TSPAN2	0.11362	0.998922	-0.391486
ANGPTL4	0.113621	0.998922	0.582904
AHCYL1	0.113672	0.998922	-0.350765
HOPX	0.113817	0.998922	-0.456595
GAR1	0.113953	0.998922	0.641212
GGPS1	0.114013	0.998922	-0.484253
RPL39	0.114027	0.998922	0.551351
SMPD1	0.114058	0.998922	0.379927
ZKSCAN3	0.114062	0.998922	0.742071
GABRA1	0.114071	0.998922	0.35628
PBLD	0.114122	0.998922	0.59628
MRPS17	0.11422	0.998922	0.552871
SNRPA	0.114316	0.998922	-0.585444
RNF34	0.114603	0.998922	-0.533827
PDK2	0.11465	0.998922	-0.918554
CD164	0.114844	0.998922	-0.571172
CUX2	0.114878	0.998922	0.638888
BRDT	0.114954	0.998922	-0.621443
SF3B4	0.114976	0.998922	-0.425925
C1R	0.11518	0.998922	0.895289
ZBED8	0.115279	0.998922	0.377686
ATP10B	0.115295	0.998922	0.453749
LRRC23 /// RPL13P5	0.115448	0.998922	-0.546027
GPR162	0.115462	0.998922	-0.587953
TRPC4AP	0.115652	0.998922	-0.531728
FNTA	0.115657	0.998922	-0.510402
CXorf21	0.115675	0.998922	-0.71366
FIS1	0.115688	0.998922	0.444598
CAMK2N1	0.115696	0.998922	-0.626225
CAP1	0.115937	0.998922	-0.430892
TRIP6	0.116055	0.998922	0.567079
AREL1	0.116177	0.998922	-0.609342
RP3-334F4.1	0.116501	0.998922	-0.690495
DUSP4	0.116871	0.998922	-0.354434
DGCR5	0.11704	0.998922	-0.732161
TMEM183A /// TMEM183B	0.117091	0.998922	0.375087
ATR	0.117167	0.998922	-0.584234
ZNF292	0.117207	0.998922	-0.594568
HPX	0.117218	0.998922	0.451813
KIZ	0.117327	0.998922	-0.71149
IGFLR1	0.117342	0.998922	-0.68395
PRKAR2B	0.117367	0.998922	-0.874493
SLC4A2	0.117487	0.998922	0.328295
FABP7	0.11765	0.998922	0.328216
GPX2	0.117731	0.998922	0.981106
CCL23	0.11779	0.998922	-1.08413
ANAPC10	0.117812	0.998922	-0.552927
BOLA2 /// LOC101060386 /// SMG1	0.118067	0.998922	-0.454117
GCC2	0.118144	0.998922	-0.550802
GPLD1	0.118153	0.998922	0.327248
MMP16	0.118603	0.998922	0.445195
TRHR	0.118756	0.998922	-0.857806
COX7A2	0.118757	0.998922	0.814915
PON1	0.118853	0.998922	0.388154
PLK1	0.118897	0.998922	0.807159
MLLT4	0.119183	0.998922	0.372703
ATP6V0A1	0.11925	0.998922	0.883024
NPM3	0.119259	0.998922	0.431875
HAO1	0.119279	0.998922	0.71059
HHLA2	0.119292	0.998922	0.396835
SLC17A4	0.119299	0.998922	1.07674
PDCL	0.119509	0.998922	-0.374755
SRCAP	0.119687	0.998922	0.657193
MATN3	0.119787	0.998922	-0.331513
PENK	0.119858	0.998922	-0.499252
GATA1	0.119866	0.998922	0.691994
MYF6	0.120108	0.998922	0.688734
KLF9	0.1202	0.998922	-0.519836
HIST1H2BL	0.120304	0.998922	0.727548
TNFSF15	0.120367	0.998922	-0.466693
ANAPC5	0.12037	0.998922	-0.439743
FAN1	0.120491	0.998922	0.428231
SEC22B	0.120527	0.998922	-0.690577
SAP130	0.120585	0.998922	0.42707
INHBC	0.120616	0.998922	0.40034
CDK8	0.120799	0.998922	-0.463301
HOXD9	0.12081	0.998922	0.398173
PRDM2	0.120953	0.998922	-0.325586
PRPF39	0.121026	0.998922	0.457302
ROS1	0.121285	0.998922	0.474027
SAT1 /// ZSWIM8	0.121317	0.998922	0.66908
ST13	0.12141	0.998922	0.461913
PRSS16	0.121457	0.998922	-0.566434
MAGEA4	0.121512	0.998922	-0.447467
SFTPC	0.121552	0.998922	0.297692
IPO4	0.121569	0.998922	-0.668457
FCGRT	0.121595	0.998922	-0.833714
RBM41	0.121751	0.998922	-1.20589
LITAF	0.121866	0.998922	-0.511618
MED1	0.122135	0.998922	-0.510159
CD4	0.122142	0.998922	-0.426537
CERS4	0.122321	0.998922	-0.598304
PCDHB6	0.122338	0.998922	-0.62973
NT5M	0.122389	0.998922	-0.541775
ANKRD10-IT1	0.122397	0.998922	0.635915
RTN1	0.122544	0.998922	-0.573625
TTC26	0.122694	0.998922	-0.921327
TMPRSS15	0.122823	0.998922	0.423291
PHLDA3	0.122838	0.998922	0.764389
FKBPL	0.122864	0.998922	-0.362527
TNFAIP1	0.122946	0.998922	0.634983
GOT1	0.122959	0.998922	0.558883
ITM2A	0.122964	0.998922	0.729618
RPN1	0.122983	0.998922	0.813874
IL24	0.123165	0.998922	1.01991
ASTE1	0.123244	0.998922	-0.984456
CXCL12	0.123557	0.998922	0.546142
REEP4	0.123646	0.998922	0.770709
ARHGEF2	0.123732	0.998922	-0.475368
PELP1	0.123735	0.998922	-0.746202
GALK1	0.124382	0.998922	0.400449
HYAL3	0.124428	0.998922	-0.616995
CXCL6	0.124442	0.998922	0.399772
RP3-334F4.2	0.124639	0.998922	0.300782
YAF2	0.124809	0.998922	-0.598955
ABCG4	0.124851	0.998922	0.587089
STRN3	0.12499	0.998922	-0.400207
MLST8	0.125018	0.998922	-0.777363
MIR3917 /// STMN1	0.125052	0.998922	0.794651
PRSS3P3	0.125053	0.998922	0.809691
TLN1	0.125124	0.998922	0.696791
NDE1	0.125192	0.998922	-0.850553
PRPF3	0.125192	0.998922	-0.670667
ATP6V1D	0.125234	0.998922	0.517403
CDS1	0.125241	0.998922	0.307145
MTMR14	0.125298	0.998922	-0.323991
ZKSCAN8	0.125333	0.998922	0.595975
RIPPLY3	0.125367	0.998922	-0.672662
SETD8	0.125393	0.998922	0.32483
APOA2	0.1254	0.998922	0.400393
S100A11	0.125475	0.998922	-1.07406
PLA2G4A	0.125603	0.998922	-0.441758
ISOC2	0.125708	0.998922	-0.507433
CPN2	0.125739	0.998922	0.769502
SS18L1	0.125765	0.998922	-0.386069
COLQ	0.125916	0.998922	-0.491827
FAT2	0.126114	0.998922	0.597083
SLC9A8	0.126173	0.998922	0.811487
FOXO3	0.126175	0.998922	1.01097
CRMP1	0.126232	0.998922	1.04007
CYP1A2	0.126296	0.998922	-0.459581
MZB1	0.126335	0.998922	1.43521
GUCY2D	0.126398	0.998922	0.715576
FBXL2	0.126474	0.998922	0.58098
TMEM39B	0.12656	0.998922	-0.48088
DUSP6	0.12657	0.998922	-0.716321
LYRM2	0.126573	0.998922	-0.507974
PGM5	0.126619	0.998922	-0.391462
GANAB	0.126731	0.998922	0.709626
POMZP3 /// ZP3	0.126785	0.998922	0.709789
MED17	0.126819	0.998922	-0.47032
PPIG	0.126821	0.998922	-0.381425
BEGAIN	0.126848	0.998922	-0.991222
PIGH	0.127204	0.998922	-0.684439
DPH5	0.127207	0.998922	-0.34792
REV3L	0.127231	0.998922	-0.761201
YIPF6	0.127276	0.998922	0.440067
F11	0.127438	0.998922	-0.479177
BRD9	0.127558	0.998922	1.1335
DGCR6L	0.127599	0.998922	0.406347
BUB1	0.127835	0.998922	0.422792
HCFC2	0.127935	0.998922	-0.598902
AKR1C2 /// LOC101930400	0.128065	0.998922	-0.501205
DOCK9	0.128112	0.998922	0.461178
MIR1244-3	0.128148	0.998922	-0.90415
HBBP1	0.128151	0.998922	0.859037
HNRNPA1	0.12826	0.998922	0.385929
HSPBP1	0.128419	0.998922	0.544188
HPGD	0.128515	0.998922	-0.495354
UBE2H	0.128811	0.998922	1.12136
RCBTB2	0.129055	0.998922	-0.624488
GMDS	0.129129	0.998922	-0.646534
IGLVIVOR22-1 /// IGLVIVOR22-1	0.129137	0.998922	0.537104
APOC3	0.129318	0.998922	-0.637012
TNIP3	0.12933	0.998922	-0.606041
DAXX	0.129626	0.998922	-0.562866
RPS6KA3	0.129632	0.998922	-0.588932
ACOT13	0.129707	0.998922	0.717958
SLC5A2	0.129771	0.998922	-0.596282
HRC	0.129944	0.998922	0.489883
TRAM1	0.13001	0.998922	-0.488477
THEG	0.130038	0.998922	-0.64756
HPSE	0.130141	0.998922	-0.636015
KLF3	0.130273	0.998922	0.750762
FOXJ2	0.130357	0.998922	0.411872
IFNA1	0.130403	0.998922	-0.353736
LRIG1	0.130445	0.998922	-0.911219
RAB11B	0.130458	0.998922	-0.5445
ADAM23	0.130662	0.998922	0.544005
DIEXF	0.130838	0.998922	-0.355621
PPCDC	0.130901	0.998922	-0.632162
OLAH	0.130911	0.998922	0.386473
DDHD2	0.130944	0.998922	-0.501623
MYBPH	0.131015	0.998922	0.68703
CLCN2	0.131109	0.998922	0.697695
PMP2	0.131268	0.998922	-0.390547
TAOK1	0.131301	0.998922	-0.932054
RP5-882O7.1	0.131345	0.998922	-0.416783
HSD17B7	0.131358	0.998922	-0.378156
TMEM223	0.131361	0.998922	0.574751
MIR4800 /// MXD4	0.131419	0.998922	-0.568252
ECM1	0.131568	0.998922	0.799017
A4GNT	0.1316	0.998922	0.835249
CXCL10	0.131649	0.998922	-1.25605
LY6H	0.131732	0.998922	-0.387553
DKC1 /// MIR664B /// SNORA56	0.131787	0.998922	-0.382633
PRKCB	0.131858	0.998922	-0.507207
AKAP17A	0.131859	0.998922	-0.472282
LOC100131510	0.131889	0.998922	-0.577285
MBD5	0.131989	0.998922	0.403025
C21orf2	0.132014	0.998922	-0.433762
AP3D1	0.132024	0.998922	-0.546676
GLP1R	0.132104	0.998922	0.354725
RBMS2	0.132163	0.998922	-0.55704
REPIN1	0.132259	0.998922	-0.555929
TMEM214	0.132288	0.998922	0.508274
OR5I1	0.132337	0.998922	0.935106
FDPS	0.132372	0.998922	-0.738868
MYO7B	0.13239	0.998922	-0.324773
CRHR1	0.132567	0.998922	-0.481692
IPO7	0.13258	0.998922	-0.391271
TRIB2	0.132666	0.998922	0.601114
COX7BP1 /// COX7BP1	0.132778	0.998922	0.777991
TEAD4	0.132849	0.998922	0.449789
EIF4EBP2	0.132882	0.998922	-0.470275
GSS	0.132944	0.998922	0.526536
ARHGAP4	0.133273	0.998922	0.722075
VAMP3	0.133308	0.998922	-0.401255
EIF6	0.133313	0.998922	-0.450134
PRKY	0.133377	0.998922	-0.645154
MARK3	0.133473	0.998922	0.427003
TBX10	0.133478	0.998922	0.456862
HADHAP1 /// HADHAP1	0.133746	0.998922	-0.461855
ZNF248	0.134096	0.998922	0.611134
FHIT	0.134144	0.998922	-0.558109
C1orf56	0.134244	0.998922	0.412646
IGLC1 /// IGLV3-25 /// IGLV3-25	0.134338	0.998922	1.26813
BAZ1A	0.134444	0.998922	-0.623549
LOC729164	0.134587	0.998922	-0.673686
LPIN2	0.134754	0.998922	0.824205
HPN	0.134785	0.998922	0.59712
TMEM212	0.13486	0.998922	0.506872
CBLB	0.134864	0.998922	-0.346933
OSBPL10	0.134986	0.998922	-0.472607
C16orf71	0.135096	0.998922	0.341641
ZNF225	0.135113	0.998922	-0.433467
AP1S2	0.135177	0.998922	-0.393241
ZG16	0.135184	0.998922	0.353335
LOC440434	0.135245	0.998922	-0.501832
C6orf106	0.135367	0.998922	0.547701
MAP7	0.135467	0.998922	0.398003
EIF4E	0.135487	0.998922	0.472608
EXOSC1	0.135538	0.998922	-0.413421
PDK1	0.135578	0.998922	-0.386082
TNFSF9	0.135657	0.998922	-0.442325
IL1B	0.135784	0.998922	0.832239
BCCIP	0.135825	0.998922	0.751715
TPBG	0.135879	0.998922	-0.606044
PSPN	0.135909	0.998922	-0.439768
STRN	0.135998	0.998922	-0.405524
STAMBP	0.136046	0.998922	-0.55386
TBL3	0.136076	0.998922	0.659357
NUTF2 /// NUTF2P4	0.136094	0.998922	0.699999
GK-AS1 /// GK-AS1	0.136139	0.998922	-0.660886
SLC35A5	0.136195	0.998922	-0.645172
UNKL	0.136572	0.998922	-0.704694
DTX2 /// LOC102725292	0.136679	0.998922	-0.46252
CADPS2	0.136689	0.998922	0.730174
EHMT2	0.136774	0.998922	-0.564672
F7	0.136908	0.998922	0.408857
MEP1B	0.136943	0.998922	0.607958
CEP55	0.137158	0.998922	0.597211
CCL2	0.137309	0.998922	-0.521313
CKMT2	0.137495	0.998922	0.650175
MFHAS1	0.137548	0.998922	-0.515297
POLG	0.137614	0.998922	0.456801
TMCC2	0.137758	0.998922	1.59638
COX11	0.137782	0.998922	-0.292296
PAXIP1	0.137856	0.998922	-0.46438
SUV39H1	0.137896	0.998922	0.347853
ARHGDIG	0.138097	0.998922	0.625151
SYN1	0.138112	0.998922	0.72687
DUS4L	0.138144	0.998922	0.518949
ARC	0.13823	0.998922	-0.856201
TYROBP	0.138342	0.998922	-0.723207
AGO2 /// CASC7 /// CASC7 /// DQ574852	0.138395	0.998922	0.436991
KIAA1024	0.138462	0.998922	-0.52551
RPLP2 /// SNORA52	0.138612	0.998922	-0.611837
PGC	0.138797	0.998922	0.724283
MAP4	0.138925	0.998922	0.325412
CNBP	0.139065	0.998922	0.8625
GNGT1	0.13923	0.998922	-0.462327
NGF	0.139239	0.998922	-0.506561
DSC1	0.13924	0.998922	-0.436532
MET	0.13935	0.998922	0.386058
IL15	0.139476	0.998922	-0.447704
SRPRB	0.139721	0.998922	-0.565373
LOC101929842 /// PGA3 /// PGA4 /// PGA5	0.139814	0.998922	1.0322
ZNF587	0.139873	0.998922	-0.46886
PDE7B	0.140118	0.998922	-0.638621
WNT10B	0.140299	0.998922	0.814405
BCL2L13	0.140428	0.998922	0.633322
SMAD2	0.140598	0.998922	-0.362866
GNB2	0.140635	0.998922	-0.575606
RMND5A	0.140645	0.998922	0.652475
TOP3B	0.140649	0.998922	-0.288958
APH1B	0.140744	0.998922	0.369788
LILRP2	0.140789	0.998922	0.613368
IGFBP2	0.141021	0.998922	0.729989
TTI2	0.141176	0.998922	-0.529067
AGO4	0.141284	0.998922	-0.329745
LINC01140	0.141337	0.998922	-0.650649
LOC102725263 /// LOC389906	0.141397	0.998922	0.631111
SAA1 /// SAA2	0.14153	0.998922	0.481131
COX20	0.141572	0.998922	-0.608163
BRIP1	0.14158	0.998922	-0.359799
ARHGAP17	0.141772	0.998922	0.654748
POLR2B	0.14181	0.998922	-0.628297
NUP93	0.141824	0.998922	-0.661991
MYO15A	0.141912	0.998922	0.418269
KDM3B	0.142002	0.998922	0.501709
APOBEC3F /// APOBEC3G	0.142074	0.998922	0.678023
PHB	0.142152	0.998922	-0.414798
QSER1	0.142201	0.998922	-0.432481
GNB1L	0.142333	0.998922	-0.82969
SLC34A1	0.142421	0.998922	0.452591
POM121	0.142465	0.998922	0.361523
ECH1	0.142542	0.998922	-0.42712
DRD1	0.142587	0.998922	-0.554487
AAR2	0.142695	0.998922	0.334323
JTB	0.142711	0.998922	-0.445342
CEBPD	0.142733	0.998922	-0.600464
CEP170 /// CEP170P1	0.142976	0.998922	-0.479997
SGPP1	0.142998	0.998922	-0.470301
HYOU1	0.143121	0.998922	0.570565
CMKLR1	0.143253	0.998922	-0.432955
TCRA /// TRAV21 /// TRAV21 /// YME1L1	0.14341	0.998922	0.483885
MXD1	0.143646	0.998922	0.91822
RFC5	0.143725	0.998922	-0.466821
ZNF3	0.143786	0.998922	0.370435
TADA3	0.143837	0.998922	-0.447238
GLRA2	0.144108	0.998922	1.26039
MBOAT2	0.144231	0.998922	0.715703
ZNF37BP	0.144412	0.998922	0.325865
SLC26A3	0.144416	0.998922	0.385443
BEST1	0.144515	0.998922	0.515246
SMAD4	0.144545	0.998922	-0.316323
ACACA	0.144849	0.998922	0.349516
HOXC4	0.144888	0.998922	0.665526
AMPD2	0.1449	0.998922	-0.610975
SYNJ2	0.145065	0.998922	-0.285522
KLHL41	0.145248	0.998922	-0.383464
ERMAP	0.145265	0.998922	0.877971
G6PC3	0.145317	0.998922	-0.517354
EGR3	0.145387	0.998922	0.626187
RFTN1	0.145464	0.998922	-0.36377
MMP9	0.145483	0.998922	1.28079
KLHDC10	0.145542	0.998922	-0.419677
TSPAN32	0.145685	0.998922	0.763396
C1GALT1	0.145738	0.998922	-0.387905
CPQ	0.145775	0.998922	-0.589806
NR5A2	0.145844	0.998922	-0.338357
MAPK6	0.145902	0.998922	1.05903
RHAG	0.146119	0.998922	0.302257
FGD2	0.146121	0.998922	-0.440029
MAGOH /// MAGOHB	0.146273	0.998922	0.501257
LINC00597	0.146371	0.998922	0.441592
SPR	0.146452	0.998922	-0.633863
FLT3	0.146479	0.998922	0.636631
NR3C1	0.146593	0.998922	-0.435234
UGT1A1 /// UGT1A10 /// UGT1A4 /// UGT1A6 /// UGT1A8 /// UGT1A9	0.146611	0.998922	0.562599
TLX3	0.146662	0.998922	1.14392
HS2ST1	0.146756	0.998922	-0.352112
TFB1M	0.146813	0.998922	-0.492596
UGT2A1 /// UGT2A2	0.146984	0.998922	-0.589029
MTHFD2	0.146993	0.998922	0.575525
TWISTNB	0.147179	0.998922	0.530413
CTSE	0.147275	0.998922	0.516599
CINP	0.147279	0.998922	-0.325642
CACNA1B	0.14732	0.998922	-0.337618
EDEM3	0.147328	0.998922	-0.391098
ALPK3	0.147452	0.998922	-0.478725
ARPC2	0.147661	0.998922	-0.409348
TCIRG1	0.147681	0.998922	0.739895
ATP6V1A	0.147707	0.998922	-0.379788
CYC1	0.147843	0.998922	-0.638403
CTSW	0.147849	0.998922	-0.534377
SPRR2C	0.147896	0.998922	-0.335414
ARHGEF12	0.147944	0.998922	0.514605
KAT6B	0.147951	0.998922	-0.457209
RFX3	0.148364	0.998922	0.733689
CNR2	0.148381	0.998922	0.517468
SH3TC2	0.148403	0.998922	-0.438748
RORA	0.148802	0.998922	0.338302
MIA	0.149212	0.998922	-0.885653
EIF2AK1	0.149219	0.998922	0.629253
ARSE	0.149375	0.998922	0.43335
POLH	0.149483	0.998922	0.373511
IFT122	0.149685	0.998922	0.625983
KIF2A	0.149709	0.998922	-0.515466
HLA-DRB6	0.149831	0.998922	0.493621
NBPF1	0.149862	0.998922	-0.466104
PDK4	0.149939	0.998922	-0.610125
STK3	0.150121	0.998922	-0.41178
LRRC40	0.15013	0.998922	-0.396043
CXCL5	0.150199	0.998922	-0.44329
FANCC	0.150315	0.998922	0.493116
RPIA	0.150323	0.998922	0.717329
HLA-DRA	0.150391	0.998922	-0.537428
MASP2	0.150489	0.998922	0.36491
C3orf52	0.150498	0.998922	0.585747
CXCL13	0.150616	0.998922	0.485108
TMEM165	0.150623	0.998922	-0.71376
DCTPP1	0.150626	0.998922	0.575312
LINC00950	0.150684	0.998922	1.18805
CPNE3	0.150731	0.998922	-0.454309
LRP5L	0.150785	0.998922	-0.538163
DDX3X	0.150856	0.998922	0.491548
ADCYAP1	0.150857	0.998922	-0.475232
MYH9	0.150966	0.998922	0.657284
TIAM2	0.151019	0.998922	-0.798844
ZBTB20	0.151021	0.998922	-0.462194
KCNQ2	0.151068	0.998922	-0.324103
NOD1	0.151111	0.998922	0.919309
MYO1B	0.151137	0.998922	0.284631
SCAP	0.151173	0.998922	-0.497807
PPP1R3C	0.15129	0.998922	-0.471638
ITGAV	0.151581	0.998922	-0.382592
BRD3	0.151594	0.998922	-0.540211
PMFBP1	0.151695	0.998922	0.605458
PRSS3	0.151846	0.998922	0.541062
CRAT	0.151906	0.998922	0.576659
ORC1	0.15191	0.998922	0.593451
ALPK1	0.151927	0.998922	-0.975379
ISYNA1	0.152137	0.998922	0.953499
FAM13C	0.152229	0.998922	0.280075
HSPA1A /// HSPA1B	0.152355	0.998922	1.05047
WBP11	0.152639	0.998922	-0.643466
F8	0.152733	0.998922	0.52323
ELK2AP	0.152797	0.998922	0.559734
TPR	0.152798	0.998922	-0.516364
NOX4	0.152802	0.998922	-0.893953
IGHA1 /// IGHD /// IGHG1 /// IGHG3 /// IGHM /// IGHV4-31	0.152937	0.998922	0.656662
FBXO9	0.153039	0.998922	0.647684
BOLA1	0.153414	0.998922	-0.408274
PRAMEF12	0.153445	0.998922	-0.612911
HMGB1	0.153483	0.998922	-0.587178
FGF23	0.153649	0.998922	0.929744
CELF2	0.153699	0.998922	-0.48562
ASUN	0.153785	0.998922	0.655171
ANKRD55	0.153802	0.998922	-0.555147
ATP8B4	0.153943	0.998922	-0.540375
CST2	0.153974	0.998922	-0.658895
TRPS1	0.154158	0.998922	-0.606699
SLC13A4	0.154333	0.998922	0.462248
RENBP	0.154442	0.998922	0.463342
MAGEA12	0.154569	0.998922	0.480496
RPA3	0.154574	0.998922	-0.998746
PPP2R2B	0.154596	0.998922	-0.323024
PLEKHO1	0.154625	0.998922	-0.585633
SNRPB2	0.154635	0.998922	0.77051
CEBPA-AS1	0.154642	0.998922	-0.486656
FRMD1	0.1548	0.998922	-0.335105
GRIP2	0.154928	0.998922	0.705952
FKBP1B	0.155157	0.998922	0.758807
AMELX	0.155238	0.998922	0.661464
RAB31	0.155307	0.998922	-0.446213
BCORL1	0.155312	0.998922	-0.616326
GLUL	0.155454	0.998922	0.504704
HOXC5	0.155465	0.998922	0.740147
MOCS3	0.155502	0.998922	0.631122
TRIB1	0.155752	0.998922	0.84639
UTP14A	0.155768	0.998922	-0.368996
LTF	0.155803	0.998922	1.48852
HHEX	0.155866	0.998922	-0.52714
IL6R	0.155882	0.998922	-0.750559
AURKAPS1 /// RAB3GAP2	0.155909	0.998922	-0.392709
TUT1	0.156129	0.998922	0.470653
EEF1A1P42	0.156157	0.998922	-0.69294
CS	0.156182	0.998922	-0.515081
RPP21 /// TRIM39 /// TRIM39-RPP21	0.156275	0.998922	-0.455992
MRPL28	0.156379	0.998922	0.563086
MAPKAPK2	0.156418	0.998922	0.346744
DOPEY1	0.156498	0.998922	0.430061
MTMR12	0.156519	0.998922	0.446464
TAF1C	0.156571	0.998922	-0.560228
GKN1	0.156783	0.998922	0.484846
AOC4P	0.156864	0.998922	0.576515
KDM7A	0.156936	0.998922	0.87033
WSB2	0.157083	0.998922	-0.47417
CRCP	0.157212	0.998922	0.311047
DNAAF2	0.15746	0.998922	0.589977
TRAK1	0.157472	0.998922	-0.378736
SLC5A7	0.157481	0.998922	0.447018
RGR	0.157836	0.998922	-0.740003
PTRH2	0.157934	0.998922	0.443715
HINFP	0.158029	0.998922	-0.668435
EPCAM	0.158114	0.998922	-0.549934
PPRC1	0.158362	0.998922	-0.439258
POU5F1B	0.158441	0.998922	0.74062
2002-09-01	0.15848	0.998922	-0.44338
MSTO1 /// MSTO2P	0.158552	0.998922	-0.776999
MCM10	0.158557	0.998922	0.776306
RNF126	0.158614	0.998922	0.355633
CENPJ	0.158702	0.998922	-0.601737
BIRC5	0.159035	0.998922	0.419581
CCNA2	0.159041	0.998922	0.44963
ANGPTL7	0.159068	0.998922	0.55345
TRPV5	0.159167	0.998922	-0.547357
EPB41	0.159215	0.998922	0.389517
DUSP3	0.159267	0.998922	-0.399508
TRAV12-2	0.159296	0.998922	0.809532
RGS16	0.159365	0.998922	0.414653
DTX4	0.159405	0.998922	0.516345
C12orf10	0.159466	0.998922	0.408381
SLC16A1	0.159494	0.998922	0.542454
GBAP1 /// LOC100510710	0.159497	0.998922	0.727087
SYCE1L	0.15951	0.998922	0.462579
CACNA2D3	0.159515	0.998922	-0.474562
KLHL25	0.159537	0.998922	-0.620633
ARHGAP8 /// PRR5-ARHGAP8	0.159808	0.998922	-0.290363
AARS	0.159809	0.998922	0.556293
TMEM160	0.159865	0.998922	-0.304343
LINC00115	0.159889	0.998922	-0.424065
SCGB1D1	0.15999	0.998922	0.492352
P2RX5	0.160004	0.998922	0.938918
SCRN1	0.16003	0.998922	-0.490711
TMED2	0.160084	0.998922	-0.466892
HLA-DQA1 /// LOC100509457	0.160107	0.998922	0.965882
FAF2	0.160121	0.998922	-0.37755
HDAC3	0.160172	0.998922	-0.639046
TSHB	0.160201	0.998922	0.390434
PQLC2	0.160369	0.998922	0.745561
WHSC1L1	0.160533	0.998922	0.377144
ASAP1	0.160921	0.998922	-0.644585
BRPF1	0.160961	0.998922	-0.747495
SND1	0.161123	0.998922	0.58186
FAM21C /// LOC101930591	0.161131	0.998922	-0.388661
CKS1B	0.161152	0.998922	0.520142
ZMYM6 /// ZMYM6NB	0.161237	0.998922	-0.398768
SYNCRIP	0.161269	0.998922	-0.302998
STAT5A	0.161445	0.998922	0.692306
GRIK2	0.161587	0.998922	-0.290209
TIMM13	0.161753	0.998922	0.441353
SS18L2	0.161766	0.998922	0.505248
SLC4A7	0.161797	0.998922	-0.382633
CSF3	0.161842	0.998922	0.32585
TMCO6	0.161936	0.998922	0.447224
RNF122	0.162066	0.998922	0.781776
ACD	0.162155	0.998922	-0.597073
RNF19B	0.162184	0.998922	0.79405
ZFX	0.162191	0.998922	0.333572
ADAM19	0.16222	0.998922	0.308922
RASSF2	0.162347	0.998922	-0.348859
KRT19P2	0.162357	0.998922	0.250116
USP1	0.162374	0.998922	-0.416957
CD177	0.162481	0.998922	1.28049
NSL1	0.162554	0.998922	-0.449574
TMED3	0.162587	0.998922	0.354478
NOP16	0.162762	0.998922	0.316098
COL1A1	0.162885	0.998922	0.330351
RAB6B	0.162919	0.998922	-0.366102
GCC1	0.163036	0.998922	0.425483
DBN1	0.163155	0.998922	0.532299
SLC12A2	0.163167	0.998922	0.632181
GTF2H2 /// GTF2H2B /// GTF2H2C /// GTF2H2C_2	0.163183	0.998922	-0.647333
SLC35D2	0.163193	0.998922	-0.56223
BOP1 /// MIR7112	0.163205	0.998922	0.347074
CYB5B	0.163223	0.998922	0.532484
HNRNPUL2	0.163295	0.998922	-0.766686
NIN	0.163341	0.998922	0.550553
SPEN	0.163457	0.998922	-0.359007
ZNF205	0.1637	0.998922	0.343071
MIR6872 /// SEMA3B	0.163735	0.998922	0.466262
TJP1	0.163754	0.998922	-0.412092
GRHL2	0.164019	0.998922	0.649547
ALDOC	0.164044	0.998922	-0.425779
SIRT4	0.164062	0.998922	0.336895
FAM153A	0.164086	0.998922	0.674871
MRPL19	0.164333	0.998922	-0.452709
TXNL4B	0.164352	0.998922	-0.380634
ASPM	0.164376	0.998922	0.738634
ACP5	0.164544	0.998922	0.813864
ARSA	0.164588	0.998922	0.869862
GALNT3	0.1646	0.998922	0.535378
MBD4	0.164613	0.998922	-0.465976
APOM	0.164652	0.998922	-0.354655
DSTN	0.16473	0.998922	-0.318878
FBXL18	0.164846	0.998922	0.276846
ZNF419	0.164855	0.998922	-0.486153
ADM	0.164874	0.998922	0.570611
PPFIBP1	0.164908	0.998922	0.354897
[truncated: 11,516 more rows]

## Sheet: CM-UM
Gene	Pvalue	FDR	logFC
TMOD1	5.78e-07	0.00781779	-1.39969
SRRD	1.07e-05	0.0722964	-1.31812
PRTN3	2.43e-05	0.109448	2.5211
MMP8	4.4e-05	0.122666	2.01455
COPS3	4.62e-05	0.122666	-1.14794
PRSS3P2	6.26e-05	0.122666	-1.25694
KAT2B	6.91e-05	0.122666	-1.15648
PCTP	7.26e-05	0.122666	-1.38353
UBE2G2	0.000109455	0.158006	-0.880095
IFIT1	0.000140296	0.158006	-3.63666
HBZ	0.000140791	0.158006	-1.90888
UPK1A	0.000145148	0.158006	1.12079
RPIA	0.000151985	0.158006	-1.37369
BCL2L13	0.00019538	0.169656	-1.1504
KLF7	0.00021013	0.169656	0.890075
SERPINB8	0.000227148	0.169656	-0.685655
RPL13A /// SNORD32A /// SNORD33 /// SNORD34 /// SNORD35A	0.000230609	0.169656	0.787472
NMI	0.000261045	0.169656	-0.881513
HJURP	0.00026168	0.169656	1.20621
GPR65	0.00026366	0.169656	-1.22628
HBQ1	0.000272914	0.169656	-0.834909
C18orf8	0.000276169	0.169656	-0.620948
CEACAM6	0.000298293	0.170617	1.44485
KIR2DL4	0.000328573	0.170617	0.669375
ACAD10	0.000338193	0.170617	-0.639499
IFIT5	0.000338745	0.170617	-1.52104
CEACAM8	0.000396221	0.170617	1.86391
PTGIR	0.00041311	0.170617	-1.016
HERC3 /// LOC101929134	0.000439589	0.170617	-0.956004
MPO	0.00044048	0.170617	1.61915
IL1R2	0.000443787	0.170617	1.77004
ZNF200	0.000450821	0.170617	-0.788102
MGAT4B	0.00046092	0.170617	0.802369
TSG101	0.000464046	0.170617	-0.689877
MYL4	0.000466574	0.170617	-1.0728
HLA-DPA1	0.000466825	0.170617	-0.853794
CTSG	0.000473951	0.170617	2.03632
AF007147	0.000479723	0.170617	-1.2265
PSMD3	0.00051048	0.176901	-0.860209
SSX2B	0.000534789	0.180182	1.05113
ADAM28	0.000576217	0.180182	0.540649
TJP2	0.000595751	0.180182	-0.694967
GIMAP4	0.000604354	0.180182	-0.896432
DEFA1 /// DEFA1B /// DEFA3	0.000617354	0.180182	2.91428
FAN1	0.000628966	0.180182	0.64588
TBPL1	0.000629843	0.180182	-1.10198
ANKRD40	0.00064056	0.180182	-0.736044
OLAH	0.000673998	0.180182	0.595741
BNIP3L	0.000675753	0.180182	-1.12633
RNASE3	0.000690773	0.180182	2.09921
CNN1	0.000691525	0.180182	0.638282
TATDN2	0.000700646	0.180182	0.681878
RNF11	0.00071102	0.180182	-1.1812
ELANE	0.000719929	0.180182	2.56344
CBLN1	0.000772211	0.18638	0.970705
VSIG4	0.000772273	0.18638	0.949761
DDX56	0.000824393	0.194695	1.20568
IGH /// IGHA1 /// IGHA2 /// IGHD /// IGHG1 /// IGHG3 /// IGHG4 /// IGHM /// IGHV4-31	0.000835537	0.194695	1.03654
HBE1	0.000881238	0.201863	-1.05994
FER1L4	0.000904286	0.203691	0.648405
TRMT61B	0.000924778	0.204891	-0.957992
LAG3	0.000941116	0.205148	1.10439
REN	0.000992761	0.207496	0.629001
CLDN11	0.000997329	0.207496	-1.05355
KIR2DS1	0.00100263	0.207496	0.713421
ZNF184	0.0010133	0.207496	-0.623206
FAM117A	0.00103765	0.209312	-0.844313
MAD2L1BP	0.00107611	0.213877	-0.606967
ZNF331	0.00109749	0.214964	0.55747
OAS1	0.00115956	0.222907	-1.2641
DEFA4	0.00120638	0.222907	2.53217
BLVRB	0.00121555	0.222907	-1.12751
HP /// HPR	0.00123246	0.222907	1.05955
CBX7	0.00125503	0.222907	-0.897338
GNB3	0.00126927	0.222907	-0.922172
DPM2	0.00131303	0.222907	-0.787698
MS4A3	0.0013174	0.222907	1.535
TKT	0.00135902	0.222907	1.06521
PODNL1	0.00138652	0.222907	-0.847787
NCAPD2	0.00138698	0.222907	1.01879
KIR3DL1 /// KIR3DL2	0.00138767	0.222907	0.769391
BST2	0.00140949	0.222907	-0.653492
BABAM1	0.00143557	0.222907	-0.563712
SETD8	0.00143878	0.222907	0.449387
MRPL34	0.00145784	0.222907	-1.022
PGLYRP1	0.00146889	0.222907	1.77096
MAP3K5	0.00147098	0.222907	-0.566632
B3GALT4	0.0014896	0.222907	-0.567553
ALDOC	0.00158371	0.222907	0.645578
NOD2	0.00159006	0.222907	-1.11269
SNIP1	0.00159354	0.222907	-0.447615
VIM	0.00164231	0.222907	0.591714
SLC2A6	0.00164276	0.222907	-1.04556
PTOV1	0.00167138	0.222907	1.04797
SLPI	0.00167962	0.222907	0.774391
TTLL4	0.00169835	0.222907	0.541295
ZBTB16	0.00169964	0.222907	0.757811
USP12	0.0017113	0.222907	-1.10462
PSMF1	0.00174793	0.222907	-0.893257
SNX5	0.00177038	0.222907	-1.13689
LPAR6	0.00177228	0.222907	-0.821908
MAP3K12	0.00179418	0.222907	0.478693
GTF2H3	0.00179846	0.222907	-0.827834
RASSF1	0.00181408	0.222907	0.610189
GPR20	0.00181439	0.222907	-0.987542
RPA2	0.00182053	0.222907	-0.500288
SIN3B	0.00187125	0.222907	-0.473496
ELP3	0.00187663	0.222907	-0.66911
ANXA2P2	0.00188774	0.222907	-0.801912
MRPS15	0.00188974	0.222907	-0.779402
PADI2	0.00188997	0.222907	0.966868
OLFM4	0.00189163	0.222907	2.52965
TRAP1	0.00191841	0.222907	-0.664212
REST	0.00193233	0.222907	0.924974
CKAP4	0.00193899	0.222907	0.729946
GRN	0.00195469	0.222907	0.653017
CLEC4A	0.00196806	0.222907	-1.1003
ADIPOQ	0.00197044	0.222907	0.526786
LCN2	0.00197692	0.222907	1.88201
PEF1	0.0019792	0.222907	0.779338
SLC25A38	0.00200706	0.224177	-0.672274
CASP5	0.00219636	0.240508	-0.867328
LTF	0.00220353	0.240508	2.11628
SNCA	0.00220666	0.240508	-1.35132
CLIC2	0.00228457	0.246073	-1.21459
IGHD	0.00229413	0.246073	0.613078
DDX58	0.00234099	0.249122	-1.03217
RNF187	0.00238055	0.251353	-0.558673
ZNF562	0.00244308	0.253323	-0.534537
IGBP1	0.00245305	0.253323	-1.2343
ARID1A	0.00245544	0.253323	0.56473
ACP1	0.00249942	0.254401	-0.79997
COL9A3	0.00252895	0.254401	0.471533
HNRNPUL1	0.00253014	0.254401	0.631805
GOT2P1 /// GOT2P1	0.00255728	0.254401	-0.736288
SLC18A1	0.0025834	0.254401	0.925677
ATXN7	0.00261652	0.254401	-0.686359
BC069776	0.00262655	0.254401	0.594763
HP	0.00263151	0.254401	0.86925
TMEM251	0.0026353	0.254401	-0.60163
GBP1	0.00265979	0.254944	-1.13559
IFIT3	0.00269185	0.25593	-1.84034
ADRA2A	0.00275438	0.25593	0.819644
FMO4	0.00277217	0.25593	0.90931
EGR2	0.00281889	0.25593	-0.951471
P4HTM	0.00282259	0.25593	0.71854
P2RY14	0.0028272	0.25593	-1.22782
C1GALT1	0.00284079	0.25593	-0.518893
PA2G4	0.00285	0.25593	0.595483
MIR6125 /// USP15	0.0029197	0.25593	-0.703393
PSMD10	0.00292068	0.25593	-0.552497
SRY	0.00293378	0.25593	0.679298
IRF7	0.0029405	0.25593	-1.14898
ZKSCAN5	0.00296131	0.25593	-0.407387
FAS	0.00296564	0.25593	-0.676133
DDX25	0.00298826	0.25593	0.791203
GUCA2A	0.00300063	0.25593	0.708879
FAR2	0.00300491	0.25593	1.00544
IL2RB	0.00301094	0.25593	0.834827
FLNA	0.00307152	0.25781	0.690966
LINC00623 /// LINC00869	0.00310635	0.25781	-1.1943
LOC100134822 /// LOC100288069 /// LOC100996442 /// LOC101927270 /// LOC101928344 /// LOC101928670 /// LOC101929540 /// LOC102724409	0.00314966	0.25781	0.541876
CTSD	0.00315185	0.25781	1.04843
MKRN1	0.00315776	0.25781	-1.07923
PIGK	0.00316625	0.25781	-0.763196
PKP3	0.00316765	0.25781	0.452258
S100A2	0.00319998	0.25781	-0.49258
OR2A20P /// OR2A9P	0.00320474	0.25781	-0.793303
TSHB	0.00326506	0.261108	0.532
KCTD5	0.00341005	0.271099	-0.5377
PKM	0.00346617	0.272889	0.684356
MYL9	0.00351614	0.272889	1.08184
FLT3	0.00353465	0.272889	0.827595
CNTNAP1	0.00355708	0.272889	1.06816
DLEU1	0.00356624	0.272889	0.506627
DIP2C	0.003571	0.272889	0.601814
CCDC64	0.0035739	0.272889	0.941051
HDHD1	0.00366746	0.277921	-0.760463
NRBP1	0.00370101	0.277921	-0.949985
VRK2	0.00373076	0.277921	-0.752859
LRRC75B	0.00373592	0.277921	0.706081
CD163	0.00377186	0.277921	0.946953
F7	0.00377983	0.277921	0.512972
PHOX2A	0.00378376	0.277921	-0.799492
TOR1A	0.00381838	0.278273	0.42104
PLK4	0.00382973	0.278273	0.582206
APRT	0.00386386	0.279225	-0.687964
TGFBI	0.00390505	0.279225	-0.68699
DCAF4	0.00393988	0.279225	-0.710207
STAT3	0.0039933	0.279225	-0.575478
KIR2DL5A	0.00402153	0.279225	1.10468
ACADVL	0.00402351	0.279225	0.528161
DCUN1D1	0.00402381	0.279225	-0.869665
SEC14L4	0.00402565	0.279225	-0.780493
PRG2	0.00402878	0.279225	1.41714
CTNND1 /// TMX2-CTNND1	0.00411538	0.282851	-0.397807
TUBB	0.00412294	0.282851	0.563421
N4BP2L2 /// U50535	0.00417878	0.285233	-1.07071
STMN1	0.00423035	0.285401	0.57463
FOXD2	0.00423535	0.285401	0.663651
FECH	0.00424459	0.285401	-1.17277
POLD1	0.00428514	0.285456	-0.827681
KMO	0.00428765	0.285456	-0.4368
IGHA1 /// IGHA2 /// IGHD /// IGHG1 /// IGHG3 /// IGHM /// IGHV4-31	0.00432656	0.285485	1.16585
C9orf38	0.00434121	0.285485	0.602241
MC1R	0.00437222	0.285485	0.631606
G6PC	0.00439672	0.285485	0.494381
CEBPA-AS1	0.00440147	0.285485	0.626243
SERPINB10	0.00444886	0.285485	1.08458
LOC145678	0.0044728	0.285485	-0.559527
PDIA2	0.00447918	0.285485	-0.40448
SRGAP3	0.0045175	0.285485	-0.58923
ERI3	0.0045728	0.285485	0.530484
OPTN	0.00460198	0.285485	-0.586398
KANSL1L	0.00460809	0.285485	-0.547689
TESC	0.00463822	0.285485	-1.28901
DHX57	0.00465049	0.285485	-0.760069
MX1	0.00467599	0.285485	-1.79194
SLC39A7	0.00474016	0.285485	0.70878
ELMO3	0.00481879	0.285485	0.404075
CCR1	0.00482191	0.285485	-0.756801
MTMR12	0.00485212	0.285485	0.569078
CMC4 /// MTCP1	0.00485418	0.285485	-0.593939
ACOT9	0.00488677	0.285485	-0.658842
MMP17	0.00489601	0.285485	-0.882719
NIPAL2	0.00490297	0.285485	1.14385
DCTPP1	0.00491096	0.285485	-0.720825
FBXO31	0.00491403	0.285485	0.838933
POP4	0.00496545	0.285485	-0.603877
TMEM59	0.00497352	0.285485	-0.918584
KIR3DL3	0.00497647	0.285485	1.02976
PRKCH	0.00498467	0.285485	0.566314
IFI44	0.00498927	0.285485	-1.33496
ITGA2B	0.0049984	0.285485	0.879733
ZFPM2	0.00501916	0.285485	0.541133
SCAMP2	0.00503026	0.285485	0.76649
PPP3R1	0.00503302	0.285485	-0.883385
CASP1	0.0050436	0.285485	-0.694037
CRIPT	0.00506294	0.285485	-0.61436
PFKFB1	0.00506966	0.285485	-0.826243
NEU2	0.00511688	0.286028	0.618446
GP9	0.00512163	0.286028	1.16276
MAT2B	0.00517066	0.287578	-0.500413
ZNF211	0.00520985	0.287761	-0.775748
KIAA0040	0.00524437	0.287761	-0.535248
GTF2H1	0.00524709	0.287761	-0.525789
AC007389.3	0.00526845	0.287761	-1.11417
EGR1	0.00528042	0.287761	-0.845338
NDRG3	0.00537023	0.291444	0.500291
SCML1	0.00539112	0.291444	-0.842843
VAT1	0.00542794	0.292265	0.785792
AF090939	0.00547266	0.293504	-0.677641
AKR1B10	0.00550072	0.293597	0.818014
LAGE3	0.00551783	0.293597	-0.8389
BCL2L2 /// BCL2L2-PABPN1 /// PABPN1	0.00559362	0.295194	0.522017
RIOK3	0.00560432	0.295194	-0.734829
APOL2	0.00561339	0.295194	-0.580233
FMOD	0.00563579	0.295224	0.498743
NUDT4 /// NUDT4P1	0.00568876	0.296848	-1.35584
RSAD2	0.00572726	0.297707	-2.35682
MED4	0.00578989	0.29981	-0.745399
HIST1H2AD /// HIST1H3A /// HIST1H3B /// HIST1H3C /// HIST1H3D /// HIST1H3E /// HIST1H3F /// HIST1H3G /// HIST1H3H /// HIST1H3I /// HIST1H3J	0.00586779	0.302684	-0.783917
MSX1	0.00592903	0.303661	0.825115
HIST1H2BN	0.00593447	0.303661	1.09034
ERCC6	0.00595413	0.303661	0.499399
LPPR1	0.0060028	0.304731	0.755666
ALG11 /// UTP14C	0.0060202	0.304731	-0.41392
DACT1	0.00612898	0.305567	0.589383
DBNDD2 /// SYS1 /// SYS1-DBNDD2	0.00613071	0.305567	0.642595
ATAD2B	0.00614392	0.305567	0.46534
MTA1	0.0061565	0.305567	-0.360731
CPS1-IT1	0.0061622	0.305567	0.440389
ZKSCAN3	0.00617709	0.305567	0.810446
MRGBP	0.00619499	0.305567	-0.465979
LOC339166 /// WSCD1	0.00629625	0.309432	0.647166
C11orf80	0.00634021	0.310464	0.543261
LAP3	0.00643576	0.313718	-0.850567
GABARAPL3	0.00650422	0.313718	0.705895
SKI	0.00650915	0.313718	0.737894
OMD	0.00651669	0.313718	0.725835
KIR3DL1	0.00652273	0.313718	0.796438
MR1	0.00655379	0.314094	-0.375475
TYW1	0.00658313	0.314385	-0.507576
LIMD2	0.0066311	0.315561	0.85086
ZBTB17	0.00678424	0.320817	-0.400081
GRK1	0.00678902	0.320817	-0.627097
PCNT	0.00684419	0.322297	-1.09953
UBE2D3	0.00690406	0.323609	-0.582955
RWDD3	0.00696933	0.323609	-0.586793
OR7E14P	0.00699824	0.323609	0.717745
SEC14L1	0.00701975	0.323609	-0.398318
LMO2	0.00709329	0.323609	-0.62252
C16orf80	0.00712295	0.323609	-0.933414
PRDM13	0.00713137	0.323609	0.449985
NIF3L1	0.00713198	0.323609	-1.07304
PMS2P8	0.00713649	0.323609	0.490741
RALGDS	0.00715078	0.323609	0.793952
STX2	0.00718906	0.323609	-0.581789
NCALD	0.0072087	0.323609	0.513486
H2AFJ	0.00721719	0.323609	-0.528728
CHST4	0.00723264	0.323609	0.865539
RAB30	0.00724989	0.323609	0.536914
LOC100996696 /// PABPC4	0.00725516	0.323609	0.518767
MINK1	0.00736635	0.326892	0.667767
ATP1B4	0.00739198	0.326892	0.363535
GIPC1	0.00742031	0.326892	0.735744
GNAO1	0.00745191	0.326892	0.648136
FABP5	0.00746477	0.326892	-0.691733
ST3GAL6	0.0074739	0.326892	-0.344737
BMPR1B	0.00749884	0.326925	1.13163
DHX30	0.0075283	0.327154	-0.496428
PTRH2	0.00758199	0.328431	-0.529909
GRAMD1B	0.0076206	0.329049	-0.666929
SSSCA1	0.00764663	0.329122	0.958344
HIST1H1T	0.0076827	0.329624	-0.674236
C12orf5	0.00779041	0.329651	-0.590177
KCNJ15	0.00783678	0.329651	-0.702504
KRT1	0.00783926	0.329651	-1.80959
IGHG1	0.00786948	0.329651	0.652226
UFC1	0.00788757	0.329651	-0.692654
PPIL6	0.00796136	0.329651	0.351022
CDC34	0.00796387	0.329651	-0.565787
SNX15	0.00797858	0.329651	-0.765888
TCTN2	0.00798366	0.329651	0.497101
ZDHHC18	0.0079934	0.329651	-0.571656
GDF9	0.00800961	0.329651	0.67081
RRAS2	0.00801163	0.329651	0.499533
STC2	0.00803924	0.329651	0.51163
ZNF253	0.00805092	0.329651	0.670104
PPRC1	0.00805207	0.329651	0.520114
TOR1B	0.00809336	0.329651	-0.738542
CALML4	0.00813248	0.329651	-0.601954
LRP5	0.00815602	0.329651	0.536229
KCNJ10	0.00817316	0.329651	0.754205
ZNF239	0.0081962	0.329651	0.679352
SRSF10	0.00824101	0.329651	-0.330286
SAT1	0.00824695	0.329651	-0.656966
POMT1	0.00824702	0.329651	0.658386
ISG15	0.0082877	0.329651	-2.16047
APOB	0.0082931	0.329651	0.754734
ABHD3	0.0083961	0.332766	-0.969496
TLE4	0.00845807	0.333684	-0.409235
ERMP1	0.00846863	0.333684	0.921975
TMEM242	0.00852254	0.333916	0.546977
MKLN1	0.00852394	0.333916	-0.622563
CBFA2T3	0.00856969	0.334738	0.660685
LDLRAD4	0.00861256	0.335113	0.419508
GRM5	0.00865759	0.335113	0.481995
IMPDH1	0.00868352	0.335113	-0.620678
SLC5A2	0.00869861	0.335113	0.645616
BATF3	0.00870584	0.335113	-1.11
DISC1 /// TSNAX-DISC1	0.00877394	0.335113	-0.515008
GNAI2	0.00878699	0.335113	0.854355
KYNU	0.0087874	0.335113	-0.467032
BACH2	0.00880244	0.335113	0.510353
PAPPA	0.00883103	0.335257	0.54407
EIF2AK2	0.00888577	0.33639	-0.824337
HOXA11	0.00894343	0.337627	-0.417289
MYF6	0.00897501	0.337876	-0.721556
TGM1	0.00903714	0.33925	0.508719
GP1BB /// SEPT5 /// SEPT5-GP1BB	0.00911039	0.33925	0.601865
GYPE	0.00913063	0.33925	-0.451615
IPPK	0.00914012	0.33925	-0.540997
KLF2	0.00919554	0.33925	0.654105
CALML5	0.00921961	0.33925	0.627028
TNFSF14	0.00922157	0.33925	-0.742058
HSD17B1	0.00922929	0.33925	0.409923
GPR124	0.00923743	0.33925	0.380684
DAP3	0.00931987	0.339987	-0.966064
SAMD4A	0.00933826	0.339987	-0.346381
SI	0.00937353	0.339987	0.398431
ZBTB3	0.00939969	0.339987	0.658338
ID1	0.00944001	0.339987	0.423679
IDO1	0.00944474	0.339987	-0.983561
CHIT1	0.00945128	0.339987	0.742705
DDB2	0.00945877	0.339987	-0.444982
TNF	0.00951345	0.341046	-0.668703
CD24	0.0095394	0.341072	0.830382
TEX40	0.00963033	0.343414	1.02067
CDKN1A	0.00967043	0.343936	-0.478703
GATA6	0.00978712	0.346624	0.58086
RFNG	0.00979728	0.346624	0.397316
TRIM21	0.00984028	0.347034	-0.656383
CALCB	0.00986024	0.347034	0.636676
FGL2	0.00989031	0.347188	-0.872966
SLC6A10P /// SLC6A10PB /// SLC6A8	0.00996684	0.348961	-0.912847
PTMAP1 /// PTMAP1	0.0100079	0.348961	0.736587
PAX9	0.0100314	0.348961	-0.515285
APOBEC3G	0.010053	0.348961	-0.459591
PTEN /// PTENP1	0.0100699	0.348961	-0.423834
CD244	0.0101399	0.350488	-0.845293
TMC7	0.0102546	0.352298	0.64286
KRCC1	0.010266	0.352298	-0.658689
THOC6	0.0102705	0.352298	-0.488776
CD6	0.0103342	0.352298	0.432697
THBS1	0.0104404	0.352298	0.341672
RAB3D	0.0104631	0.352298	-0.669961
TNFSF10	0.0104913	0.352298	-1.16979
B4GALT5	0.0105088	0.352298	0.627237
KLHL18	0.0105138	0.352298	0.532055
BTN3A2 /// BTN3A3	0.0105218	0.352298	-0.754356
HMHB1	0.0105552	0.352298	0.501794
RGS2	0.010616	0.352298	-0.648435
PTGS2	0.010638	0.352298	-0.768797
GZMH	0.0106622	0.352298	-0.835007
STAT1	0.010663	0.352298	-0.624996
ATP6V0E2	0.0107055	0.352298	-0.717489
LRRC49	0.0107494	0.352298	0.528457
MIR6732 /// ZC3H12A	0.010762	0.352298	0.782939
ABCG5	0.010764	0.352298	0.583301
APOD	0.0107877	0.352298	0.83369
ART1	0.0108015	0.352298	0.588037
CCL14 /// CCL15-CCL14	0.0108027	0.352298	0.981098
TRAK2	0.0108524	0.352298	-0.756604
SNRPC	0.0108536	0.352298	-0.855682
SNTG1	0.0108601	0.352298	0.678234
CXCL12	0.0108935	0.352298	0.559481
CXCL2	0.010911	0.352298	0.695425
PRL	0.0109221	0.352298	0.858493
POM121 /// POM121C	0.0109796	0.353307	0.541515
SERPINA1	0.0110251	0.353929	0.391371
IRF9	0.0110654	0.354381	-0.941165
ZNF343	0.0111868	0.357163	0.652374
CLCA3P	0.0112187	0.357163	0.318938
MDC1	0.0112315	0.357163	0.491744
GJD2	0.0113316	0.35942	-0.69358
SMR3A	0.0113557	0.35942	0.522271
HGH1	0.0114102	0.359632	0.658735
SOAT1	0.0114156	0.359632	-0.702618
SLC27A3	0.0114455	0.359736	-0.677351
SLC35C2	0.0115141	0.360949	0.589076
NAT8B	0.0115577	0.360949	-0.643468
COX6A2	0.0115815	0.360949	0.406243
IRX5	0.0116107	0.360949	0.463761
ARHGEF38	0.0116177	0.360949	0.780855
HYAL3	0.0116748	0.361891	0.626157
PDE11A	0.0117566	0.362276	0.769162
AC007967.3 /// RBMY2TP /// RBMY2TP	0.0118017	0.362276	0.884634
ZNF391	0.0118041	0.362276	0.641854
STAG3	0.0118054	0.362276	0.486883
TMEM158	0.0118629	0.362276	-1.26383
SCNN1A	0.011892	0.362276	0.433825
IGF2BP2	0.0118954	0.362276	-0.844152
IMP4	0.0119016	0.362276	-0.909703
EPHB4	0.0119848	0.363205	-0.445031
STAG2	0.0119859	0.363205	-0.523284
MAGEL2	0.012046	0.363982	0.574171
GTF2IRD1	0.0121178	0.363982	1.1167
PAFAH1B2	0.0121456	0.363982	0.531603
VNN1	0.0121704	0.363982	0.888509
TPBG	0.0121875	0.363982	0.630502
WDR45	0.0122197	0.363982	-0.669823
IFIH1	0.0122225	0.363982	-0.532484
CDY1	0.0122366	0.363982	0.339678
ADAT1	0.0122659	0.363982	-0.464864
RP11-429B14.4	0.0122809	0.363982	0.558771
GTF2H5	0.0123109	0.364074	-0.681185
PARN	0.0123874	0.364745	0.605421
SNRPA1	0.0124298	0.364745	-0.493222
HCCS	0.0124471	0.364745	-0.380713
CTNNAL1	0.0124632	0.364745	-0.767743
GNG13	0.0124828	0.364745	0.563176
ARSE	0.0124955	0.364745	0.465526
IGH /// IGHA1 /// IGHA2 /// IGHD /// IGHG1 /// IGHG3 /// IGHG4 /// IGHM /// IGHV3-23 /// IGHV4-31	0.0125598	0.365463	1.09238
GTF2IRD2B	0.0125742	0.365463	0.480555
STYXL1	0.0126045	0.365514	-0.703176
ATG3	0.01263	0.365514	-0.457671
SIM1	0.0126913	0.366503	0.674864
ZNF81	0.0127467	0.366881	0.458702
BTBD3	0.0127587	0.366881	-0.475362
CENPB	0.0129316	0.37048	-0.414007
TAPT1	0.0130054	0.37048	-0.392227
STAT4	0.0130452	0.37048	0.619843
SRSF8	0.0130871	0.37048	-0.611707
FCGR1B	0.0131201	0.37048	-0.875152
SLC35E3	0.0131667	0.37048	0.393428
IPO13	0.0132886	0.37048	0.609398
ACTL6A	0.0133086	0.37048	-0.446223
IFI44L	0.0133882	0.37048	-1.9307
HCAR3	0.013406	0.37048	-0.918826
WWP1	0.0134101	0.37048	-0.469359
PPM1G	0.0134106	0.37048	-0.577424
SP100	0.0134181	0.37048	-0.356475
GPR32	0.0134285	0.37048	0.544891
KLHDC10	0.0134826	0.37048	-0.440317
ZBED5	0.0135029	0.37048	-0.915279
FAM153A /// FAM153B /// FAM153C /// LOC100507387 /// LOC101928349 /// LOC101930363	0.0135129	0.37048	-0.356086
RIT1	0.0135496	0.37048	-0.3672
FXR2	0.0135544	0.37048	0.429325
BAG3	0.0135589	0.37048	0.608906
ZCCHC2	0.0136009	0.37048	-0.510788
TP53TG3 /// TP53TG3B /// TP53TG3C /// TP53TG3D	0.0136184	0.37048	0.415031
PSME1	0.013636	0.37048	-0.715126
ZNF384	0.0136382	0.37048	0.57381
PAIP2B	0.0136398	0.37048	0.508608
TUBB8P2 /// TUBB8P2	0.0136969	0.37048	0.607
BIRC2	0.0136979	0.37048	-1.18046
POLR3G	0.0137018	0.37048	-0.405133
PDZD2	0.0137104	0.37048	0.375875
LOC732360 /// TDG	0.0137444	0.37048	-0.634273
CHCHD7	0.0137709	0.37048	-0.780022
TNIP3	0.0138045	0.37048	0.605594
SMPD1	0.0138431	0.37048	0.362926
INSM1	0.0138562	0.37048	0.466095
CRYL1	0.013874	0.37048	0.516924
PAPOLA	0.0138788	0.37048	-0.345767
EDN2	0.0138981	0.37048	0.470129
HSPB2	0.0139569	0.3707	-0.3057
FOXC1	0.0139612	0.3707	0.97166
JAM2	0.0140155	0.370701	-0.863184
OR1A1	0.0140162	0.370701	0.617545
BPGM	0.0141286	0.371929	-0.798711
DDAH2	0.0141294	0.371929	0.606417
IGLC1 /// IGLV3-25 /// IGLV3-25	0.0141782	0.371929	1.27896
RTP4	0.0142037	0.371929	-1.29846
METTL13	0.0142216	0.371929	0.385333
LZTR1	0.0142345	0.371929	0.613861
POLA1	0.0142552	0.371929	0.410941
ZCCHC6	0.0143178	0.372843	-0.692032
CNOT1	0.0143614	0.373259	0.353825
SAG	0.0144427	0.374189	0.56777
PADI1	0.014457	0.374189	1.0394
ECM1	0.0145244	0.374189	-0.796165
GPI	0.014557	0.374189	0.642013
DAGLA	0.0145587	0.374189	0.35579
TNFRSF4	0.0145633	0.374189	0.566789
PTPLB	0.0146132	0.374245	-0.385086
LIME1	0.0146368	0.374245	-0.787267
HSD3BP1 /// HSD3BP1	0.0146486	0.374245	0.559185
YPEL5	0.0147748	0.3752	-0.606121
RGPD3 /// RGPD4 /// RGPD5 /// RGPD6 /// RGPD8	0.0147751	0.3752	0.286502
MIR6872 /// SEMA3B	0.0147761	0.3752	-0.504542
LOC101060373 /// NOMO1 /// NOMO2 /// NOMO3	0.014797	0.3752	-0.412053
RP4-595K12.1	0.0149411	0.377698	0.590921
RAB6A /// RAB6C /// WTH3DI	0.0149868	0.377698	-0.860107
FAM171A1	0.0150569	0.377698	0.432515
CHST11	0.015059	0.377698	-0.694682
CXCL10	0.0150704	0.377698	-1.24349
SKIV2L	0.0152198	0.377698	0.368816
SNRNP25	0.0152624	0.377698	-0.603961
SNCB	0.0153494	0.377698	-0.672425
ZNF208 /// ZNF595 /// ZNF718	0.0153763	0.377698	0.574194
ADAMTS6	0.0154105	0.377698	0.609354
GUCA1B	0.015448	0.377698	-0.365305
PRDX6	0.0154499	0.377698	-0.525182
FOS	0.0154629	0.377698	-1.26125
JADE2	0.0154643	0.377698	0.308157
ITGB2	0.015474	0.377698	0.579512
TRIM16	0.0154983	0.377698	-0.431044
SNX2	0.0155194	0.377698	-0.574541
AOAH	0.0155577	0.377698	-0.668787
ST6GALNAC5	0.0155904	0.377698	0.434391
EGFL7	0.0155925	0.377698	0.66703
GTF2B	0.0155944	0.377698	-0.802698
NAA11	0.0156066	0.377698	0.523981
DNM3	0.0156309	0.377698	0.406229
AUNIP	0.0156351	0.377698	0.360627
EIF4G3	0.0156516	0.377698	0.449832
HEATR2	0.0156528	0.377698	0.552942
EVA1B	0.0156952	0.377698	0.64888
PSME3	0.015709	0.377698	0.432633
VRK3	0.0157259	0.377698	0.525715
SIPA1L1	0.0157595	0.377698	-0.534675
STX12	0.0157644	0.377698	-0.69104
LYVE1	0.0157898	0.377698	0.426175
UBQLN2	0.0159548	0.380751	0.537421
FAM86C1	0.0159738	0.380751	0.392394
FAM8A1	0.0160256	0.381313	-1.06661
DHX32	0.0160912	0.381685	0.880627
DEFA5	0.0161075	0.381685	0.577532
FPGT-TNNI3K /// TNNI3K	0.016126	0.381685	0.660282
DPYS	0.0162575	0.382953	0.636356
F9	0.0162795	0.382953	0.484508
TSPAN5	0.0162915	0.382953	-1.0799
KNG1	0.0163151	0.382953	0.359252
ENO1	0.0163443	0.382953	0.538812
C21orf59	0.0163536	0.382953	-0.72899
BPI /// LOC149684	0.0163779	0.382953	1.22648
SPAG4	0.0164068	0.382968	-0.567894
LINC01278	0.0164647	0.383656	0.302067
CD177	0.0165354	0.384424	1.35297
RPL23AP22 /// RPL23AP22	0.0165546	0.384424	0.597445
ZCWPW1	0.0166526	0.385054	0.745187
OR2H1	0.0166682	0.385054	-0.589979
GPHN	0.016719	0.385054	0.747258
GRB2	0.0167345	0.385054	0.70472
TEX30	0.0167402	0.385054	0.508426
CFHR4	0.0167526	0.385054	0.357569
AK5	0.0169104	0.387063	-0.710679
AASDHPPT	0.0169237	0.387063	-0.358604
MBD1	0.016926	0.387063	-0.597147
CTDP1	0.0169836	0.387568	-0.561054
KDM3B	0.0170647	0.387568	0.499458
KRT5	0.0170664	0.387568	0.720045
SHROOM2	0.0170819	0.387568	0.456299
RABGAP1L	0.0171178	0.387568	-0.4472
PID1	0.0171201	0.387568	-0.348056
LIPE	0.0171554	0.387717	0.367954
MAGEH1	0.0172158	0.387992	-0.780505
RASSF4	0.0172251	0.387992	-0.356618
RSG1	0.0172769	0.387992	-0.638064
CFH	0.0172938	0.387992	0.527834
IL1RAPL2	0.0173372	0.387992	0.415594
KCNE1	0.0173595	0.387992	0.405646
CLOCK	0.0173685	0.387992	0.376141
CTRC	0.0174707	0.388329	0.559825
HUNK	0.0174766	0.388329	0.359396
DNASE1L2	0.0174902	0.388329	-0.862638
IL13	0.0174985	0.388329	0.75268
ZNF79	0.0175824	0.389551	0.465722
NAA40	0.0176241	0.389835	0.319501
C11orf1	0.0177665	0.392343	0.939435
SLC20A1	0.0179409	0.392757	-1.00641
CETN2	0.0179491	0.392757	-0.887637
PCMTD2	0.0179689	0.392757	-0.653604
TLR1	0.0179921	0.392757	-0.463687
DDX60	0.0180242	0.392757	-0.87735
MYBBP1A	0.0180306	0.392757	0.698841
GOT1	0.0180561	0.392757	0.521942
CLCF1	0.0180904	0.392757	0.687727
CHD1L	0.0181043	0.392757	0.328584
ATP1A1	0.0181074	0.392757	0.76634
C1QTNF1	0.0181141	0.392757	0.681606
KEL	0.0182554	0.392757	-0.749998
BECN1	0.0182789	0.392757	-0.452176
PLEK2	0.0182847	0.392757	-0.615095
PDE4D	0.0182897	0.392757	0.353162
LAT2	0.018312	0.392757	-0.486778
MROH7-TTC4 /// TTC4	0.0183794	0.392757	-0.656671
NRG2	0.0183905	0.392757	0.30741
IL2RG	0.0183992	0.392757	0.533383
FAM57A	0.018402	0.392757	0.777205
MRPS2	0.0184146	0.392757	-0.454969
YWHAH	0.018452	0.392757	0.652807
IFNA1 /// IFNA13	0.0184536	0.392757	0.622405
ENTPD6	0.0184985	0.392922	-0.731457
TM7SF3	0.0185195	0.392922	0.47213
WDR77	0.0185898	0.393286	-0.480365
WFDC1	0.0186324	0.393286	0.57848
ZNF133	0.0186491	0.393286	-0.436981
UGCG	0.0186863	0.393286	0.672323
SKA1	0.0187526	0.393286	0.409034
NEO1	0.0187633	0.393286	0.507164
PSMA5	0.0187674	0.393286	-0.725741
PRMT8	0.0187983	0.393286	-0.547163
TAOK2	0.0187986	0.393286	0.433145
ARFIP2	0.01898	0.396164	-0.742011
HAUS5	0.0189948	0.396164	0.336576
LOC100131510	0.0190601	0.396169	0.547344
C9orf78	0.0191015	0.396169	-0.926846
UQCR11	0.0191099	0.396169	-0.587123
ARNTL	0.0191337	0.396169	-0.494708
OR52A1	0.0191416	0.396169	0.756661
MAOA	0.019312	0.398384	0.388117
PRKDC	0.0193279	0.398384	0.287176
TLX3	0.019337	0.398384	1.1261
ROBO4	0.0194818	0.399715	0.609391
SH2B2	0.0195306	0.399715	0.542703
PDGFC	0.0195929	0.399715	0.53013
RCAN3	0.0195948	0.399715	0.32726
CH25H	0.0196427	0.399715	-0.575017
ADAM20	0.0196434	0.399715	-0.282598
BRE	0.0197016	0.399715	0.617482
SIGLEC15	0.0197026	0.399715	1.0648
RPL14	0.0197065	0.399715	0.405617
SLC38A6	0.0197152	0.399715	-0.502546
HS3ST2	0.0197667	0.399715	0.537097
SLC15A3	0.0197696	0.399715	-0.810389
RNF13	0.0197861	0.399715	-0.376929
ZDHHC17	0.0198723	0.400407	-0.361448
HAUS7 /// TREX2	0.0198906	0.400407	-0.334074
ASUN	0.0199151	0.400407	-0.653455
ITGA9	0.0199389	0.400407	0.673214
SLC35B1	0.0199741	0.40052	-0.460886
ZC3HAV1	0.0201266	0.40298	-0.545595
MRC2	0.0201725	0.402991	-0.475157
ZNF587	0.0202054	0.402991	0.449359
TPCN1	0.0202167	0.402991	0.46695
ABHD17A	0.0203583	0.40384	0.623419
NOX5	0.0204251	0.40384	0.67005
ZFHX4	0.0204299	0.40384	0.792872
GRPEL1	0.0204427	0.40384	-0.611151
SH3BGRL3	0.0204771	0.40384	0.716386
HOXB5	0.0204838	0.40384	-0.346219
CCRN4L	0.0204918	0.40384	0.592914
ACADS	0.0204983	0.40384	-0.47875
PTH1R	0.0205665	0.404253	0.7061
RIOK2	0.0205791	0.404253	-0.749686
NACAP1	0.0206703	0.40511	0.471632
HOXA5	0.0206827	0.40511	0.699177
CCDC109B	0.0207153	0.405163	-0.434308
CCDC71	0.0208115	0.40597	-0.762922
CRX	0.0209109	0.40597	-0.340158
TRAF3IP3	0.0209286	0.40597	-0.457102
SELENBP1	0.0209421	0.40597	-1.1844
MTERF4	0.0209442	0.40597	-0.580541
AC003989.4	0.0209521	0.40597	0.425753
APP	0.0209668	0.40597	0.332801
CDC16	0.0209971	0.405974	-0.593338
LSM2	0.0211291	0.40737	0.433822
CCR7	0.021131	0.40737	0.651082
CDH22	0.0211614	0.40737	-0.528329
POLL	0.0212059	0.40737	-0.313102
CREG1	0.0212392	0.40737	-1.10902
CROCC	0.0212667	0.40737	-0.452654
TUT1	0.0213048	0.40737	0.46611
SCAMP3	0.0213105	0.40737	0.473329
CSRNP2	0.0213684	0.407514	0.609493
LRRFIP1	0.0213943	0.407514	0.276347
CEP250	0.0214084	0.407514	0.363678
GFOD1	0.0214964	0.40772	0.688197
ATN1	0.0215314	0.40772	0.317756
CHMP3 /// RNF103-CHMP3	0.0215754	0.40772	-0.512236
IRF9 /// RNF31	0.0215935	0.40772	-0.38107
TRAF4	0.0216162	0.40772	0.525031
PSMD13	0.0216849	0.40772	-0.617285
ITM2B	0.0217043	0.40772	-0.462412
IREB2	0.0217522	0.40772	-0.412928
LMO7	0.0217546	0.40772	0.39475
METTL2B	0.0217628	0.40772	0.835634
NOTCH2	0.0217688	0.40772	0.285552
TUBB2A	0.0217813	0.40772	-1.52337
HECTD4	0.0218156	0.407799	-0.64062
KDM7A	0.0218817	0.408042	-0.859188
ATP5G1	0.0218894	0.408042	0.528362
SLC25A1	0.0219505	0.408042	0.472621
ATXN2L	0.0219727	0.408042	0.519828
XDH	0.0219796	0.408042	0.741145
ZMYM1	0.0221093	0.409887	-0.426341
ACVR1	0.0221787	0.410609	-0.334047
FLAD1	0.0222432	0.411241	-0.44818
IGH /// IGHA2 /// IGHD /// IGHG1	0.0223469	0.412149	0.77369
IL1A	0.0223843	0.412149	0.38696
ANP32C	0.0224291	0.412149	0.326574
CTSV	0.022448	0.412149	-0.441715
GPR64	0.022514	0.412149	-0.434046
ZBP1	0.0225288	0.412149	-0.723208
ARMCX3	0.0225304	0.412149	-0.666679
CNTN1	0.0225363	0.412149	0.632917
SPOCK2	0.0227267	0.415069	0.484085
FOLH1	0.0228292	0.4159	0.669523
MED17	0.0228337	0.4159	-0.424301
OGFOD3	0.0230429	0.417114	-0.277682
ATOX1	0.0230758	0.417114	-1.13578
ATP9B	0.0231068	0.417114	-0.322928
NOTCH3	0.0231213	0.417114	0.457138
CYP2R1	0.0231244	0.417114	0.402569
ZFAND5	0.0231269	0.417114	-0.482364
NBN	0.0231427	0.417114	-0.37006
SMNDC1	0.0231592	0.417114	-0.54581
NME1-NME2 /// NME2	0.0231941	0.417114	0.575211
WISP1	0.0232629	0.417114	0.370795
TTC17	0.023277	0.417114	0.443545
RAP1GAP	0.0233925	0.417114	0.63976
CLDN5	0.0234316	0.417114	0.867461
GDNF	0.0234393	0.417114	-0.519602
NDUFAF1	0.0234407	0.417114	0.36767
DUS1L	0.023465	0.417114	-0.374072
DMRT1	0.0235019	0.417114	-0.516816
POLR3B	0.0235026	0.417114	0.485034
LOC100996724 /// LOC100996761 /// LOC101929792 /// LOC101930416 /// PDE4DIP	0.0235279	0.417114	0.281132
CD3G	0.0236044	0.417114	-0.914126
IFRD2	0.0236285	0.417114	0.58599
UNKL	0.0236576	0.417114	-0.648724
MUL1	0.0236598	0.417114	1.06527
MAP2K6	0.0236643	0.417114	0.455661
SSTR3	0.0237	0.417114	-0.49125
EMC2	0.0237028	0.417114	-0.597712
P2RX1	0.0237421	0.417262	0.526936
TOR3A	0.0237797	0.417379	-0.666358
TSPAN4	0.0238282	0.417689	-0.477627
LMBRD1	0.0238802	0.41769	-0.421182
UBE2B	0.0239099	0.41769	-0.395008
OLIG2	0.023921	0.41769	0.533656
TRIP13	0.0239969	0.418253	0.343427
NEUROD4	0.0240449	0.418253	0.605552
ZNF267	0.0240623	0.418253	-0.629703
DECR1	0.024077	0.418253	-0.394279
RNASEH2A	0.024173	0.418864	0.487318
PRKAR1B	0.0241939	0.418864	0.360481
HOXC11	0.0242051	0.418864	0.617379
CREB3L2	0.0242554	0.419197	-0.352785
AP1S2	0.024416	0.421434	-0.358319
PRB3	0.0245464	0.423143	0.374411
LOC100507577 /// LONP2	0.0246386	0.42351	-0.762118
MFSD7	0.0246696	0.42351	-0.478426
TRIM38	0.0247236	0.42351	-0.520347
C5AR2	0.0247832	0.42351	0.634861
AEN	0.0248258	0.42351	-0.463107
TMX2	0.0248363	0.42351	-0.414014
GRK4	0.0249321	0.42351	-0.322131
ACVR2B-AS1	0.024939	0.42351	0.785618
EPHB6	0.0249701	0.42351	0.47142
SH3BP1	0.0249978	0.42351	0.642044
MYH9	0.024999	0.42351	0.621953
AOC3	0.0250297	0.42351	-0.516217
PHKG2	0.0250453	0.42351	0.67196
CD70	0.025077	0.42351	-0.59783
PCLO	0.0250865	0.42351	0.337029
CDC73	0.0250897	0.42351	-0.75464
LIMS1 /// LIMS3 /// LIMS3L	0.0251004	0.42351	0.701836
PUM1	0.0252157	0.423776	0.360497
MRFAP1L1	0.0252346	0.423776	-0.549803
TCN1	0.0252472	0.423776	0.636308
NDUFB3	0.0252713	0.423776	-0.688232
PTPRK	0.0252781	0.423776	-0.545457
LMNB1	0.0253043	0.423776	-0.380065
TLN1	0.0253541	0.424086	0.612434
SCG5	0.0253863	0.424099	0.493135
ASB8	0.0254181	0.424106	0.766709
LASP1	0.0255003	0.424155	0.429283
RAP1A	0.0255024	0.424155	-0.761487
DNAJA1	0.0255152	0.424155	-0.521601
RNF125	0.0256146	0.425284	-0.514586
SDHB	0.0257473	0.42652	-0.360821
IGHA1 /// IGHA2 /// IGHG1 /// IGHG4 /// IGHM /// IGHV4-31 /// LOC102723407	0.0258405	0.42652	0.274232
PLOD3	0.0258543	0.42652	0.451255
BZRAP1	0.0258718	0.42652	0.469299
TTN	0.0259292	0.42652	0.416757
TRAF3IP1	0.0259352	0.42652	0.478057
DNAJC17	0.0259662	0.42652	0.398284
NRBF2	0.0259724	0.42652	-0.495501
YLPM1	0.0259918	0.42652	0.342433
GP6	0.0260046	0.42652	-0.382938
CANX	0.026101	0.426679	0.363802
NYX	0.0261134	0.426679	-0.502443
AFG3L2	0.0261231	0.426679	-0.638811
TAAR5	0.026141	0.426679	0.326304
MPC2	0.0262068	0.426679	-0.28752
FADD	0.0262076	0.426679	-0.635447
MAPK13	0.0262595	0.426679	0.386594
TTC1	0.0262881	0.426679	-0.461152
PSG6	0.0263129	0.426679	0.460078
PTPRN2	0.0263322	0.426679	0.28798
IARS2	0.026371	0.426679	0.365058
ALDH8A1	0.0264038	0.426679	0.513346
OSER1	0.0264382	0.426679	-0.447216
WAC	0.0264972	0.426679	-0.374481
UCHL3	0.0265936	0.426679	-0.857589
REG1A	0.0266179	0.426679	-0.660272
BST1	0.0266186	0.426679	0.35936
MRPS28	0.0266239	0.426679	-0.58998
P2RY1	0.0267142	0.426679	0.37342
XYLT2	0.0267552	0.426679	-0.494312
TDRD1	0.0267666	0.426679	0.459581
RPS6KC1	0.0267739	0.426679	-0.586011
DDX39A	0.0267807	0.426679	0.368548
CTSW	0.0268543	0.426679	-0.49415
ELL2P3 /// ELL2P3	0.0268573	0.426679	0.482716
EDEM2	0.0268941	0.426679	-0.603066
ARHGEF1 /// LOC100505585	0.026898	0.426679	0.302974
CPA1	0.0268983	0.426679	0.35708
CHMP5	0.0269628	0.42671	-0.85997
CAPN3	0.026978	0.42671	0.280437
EPN1	0.026995	0.42671	-0.479683
TCF7L1	0.0270653	0.427322	0.670308
C5orf28	0.0271826	0.427975	-0.409221
IVL	0.0272121	0.427975	0.691017
RREB1	0.0272135	0.427975	0.267482
GSTP1	0.0273518	0.427975	0.685844
PTP4A2	0.0273683	0.427975	-0.339629
RNF138	0.0273708	0.427975	-0.556442
GLDC	0.0274896	0.427975	-0.416813
SPRYD7	0.0275069	0.427975	0.632924
PEX11B	0.0275294	0.427975	0.423047
FAM106A	0.0275337	0.427975	0.371035
PSG3	0.0275376	0.427975	0.682714
ARG1	0.0275395	0.427975	0.809135
GDPD5	0.0275405	0.427975	0.640937
CYP2D6 /// CYP2D7P /// LOC101929829	0.027592	0.427975	0.726653
BICC1	0.0276254	0.427975	0.551263
PTEN	0.0276273	0.427975	-0.490356
RYR2	0.0277163	0.427975	0.449499
CNPPD1	0.0277239	0.427975	-0.6843
G6PD	0.0278073	0.427975	0.640208
ALDOA	0.0278105	0.427975	0.618272
LOC102723479	0.0278128	0.427975	-0.486669
C6orf10	0.0278141	0.427975	0.676208
VCX2	0.0278365	0.427975	-0.362361
RUNX1-IT1	0.0279222	0.427975	-0.63582
AQP1	0.0279632	0.427975	0.421955
HOXA6	0.0279869	0.427975	0.532355
DDX31	0.0279972	0.427975	0.549446
MAT2A	0.0280478	0.427975	0.348444
IL18R1	0.0280502	0.427975	0.578262
AREG	0.0280567	0.427975	0.290135
SCAP	0.0281179	0.428425	-0.459939
RASSF8	0.0281932	0.42858	0.509161
GAPDH	0.028242	0.42858	0.388874
ASCL1	0.0282455	0.42858	0.394533
YY1AP1	0.0282642	0.42858	-0.757695
IFIT2	0.0283311	0.42858	-1.25724
SCUBE3	0.0283403	0.42858	0.563671
ZNF197	0.0283972	0.42858	0.419989
CCDC7	0.0284254	0.42858	-0.465615
ELAVL2	0.0284376	0.42858	0.266483
AV8S2 /// TRAV13-2 /// TRAV13-2	0.0284516	0.42858	0.486634
ANKRD49	0.0284768	0.42858	-0.66516
ADAM30	0.0285511	0.429219	-0.501715
SYT5	0.0286294	0.429802	0.337674
CSRP2	0.028676	0.429802	-0.368698
NRGN	0.0287161	0.429802	0.829003
DLEU2 /// DLEU2L /// MIR15A	0.0287363	0.429802	-0.454941
GTF3C4	0.0287631	0.429802	-0.518783
CDC25B	0.0287879	0.429802	0.373383
NOC3L	0.0288125	0.429802	-0.543481
PPP2R4	0.0289348	0.43115	-0.597173
CEACAM7	0.0290273	0.432053	0.308402
ITGA2	0.029114	0.432745	0.300511
BARD1	0.0291599	0.432745	0.70401
ISCA1	0.029174	0.432745	-0.847538
EPRS	0.0292099	0.432745	0.293026
GAGE1 /// GAGE12B /// GAGE12C /// GAGE12D /// GAGE12E /// GAGE12F /// GAGE12G /// GAGE12H /// GAGE12I /// GAGE12J /// GAGE13 /// GAGE2A /// GAGE2B /// GAGE2C /// GAGE2D /// GAGE2E /// GAGE3 /// GAGE4 /// GAGE5 /// GAGE6 /// GAGE7 /// GAGE8	0.0292362	0.432745	0.545608
MCFD2P1 /// MCFD2P1	0.0292741	0.432745	-0.309541
MTMR7	0.0293295	0.432745	0.478767
SLC7A9	0.02933	0.432745	-0.689225
TNIP1	0.0293872	0.433117	-0.482771
SLC30A1	0.0295316	0.433552	-0.919217
SLC5A3	0.0295442	0.433552	0.386615
MKI67	0.029724	0.433552	0.293388
FAT4	0.0297888	0.433552	-0.385299
KIF18B	0.0297941	0.433552	0.58356
AZU1	0.0298165	0.433552	0.998181
UNC50	0.029909	0.433552	-0.868448
TENM4	0.0299511	0.433552	0.28555
HEATR3	0.029962	0.433552	-0.384846
YIPF6	0.0299682	0.433552	-0.375769
ATP6V1A	0.029984	0.433552	0.342983
SMCHD1	0.030016	0.433552	-0.553919
DUSP11	0.0300191	0.433552	-0.692768
ZNF140	0.0300273	0.433552	0.453092
AKAP5	0.0300656	0.433552	0.585147
RPS4XP2 /// RPS4XP2	0.0300703	0.433552	0.369154
IGHV3-73 /// IGHV3-73	0.0300743	0.433552	0.552535
KIR3DS1	0.0300819	0.433552	0.660023
NLGN4Y	0.0301047	0.433552	0.571632
STEAP1B	0.0301048	0.433552	0.688775
ICK	0.0301078	0.433552	-0.463642
SNRNP27	0.0301225	0.433552	-0.519417
CXCR6	0.0301609	0.433643	0.387513
TMEM39A	0.0302226	0.43372	-0.561713
SF3A3	0.0302304	0.43372	-0.320472
ZNF671	0.0303179	0.434513	-0.43419
LAMTOR2	0.0304042	0.435289	-0.562669
ZFP36L2	0.0304399	0.435339	0.434442
NOL8	0.030564	0.436327	-0.662587
SLC12A5	0.0305736	0.436327	0.844071
GJB4	0.0306228	0.436523	0.454222
COX17 /// POPDC2	0.0306519	0.436523	-0.580595
CRCP	0.0307762	0.43779	0.286371
FLCN	0.0308056	0.43779	0.487873
CDC40	0.0308832	0.438431	-0.354018
SPTA1	0.0309589	0.439044	0.436854
2001-03-01	0.0310427	0.439771	-0.486884
ICAM4	0.0312111	0.440779	-0.600954
KIF2C	0.0312184	0.440779	0.39122
PPP2R2A	0.0312679	0.440779	-0.441558
LRRC41	0.0313251	0.440779	0.349349
PLLP	0.0314174	0.440779	0.671855
CUL4B	0.0314313	0.440779	-0.331528
NINL	0.0314325	0.440779	0.374849
PGD	0.0314718	0.440779	0.746581
CPQ	0.0315427	0.440779	-0.52415
KCNIP1	0.0315725	0.440779	0.755756
IDE	0.0315792	0.440779	0.347815
EGFL8 /// PPT2	0.0315859	0.440779	-0.556428
ZNF408	0.0315909	0.440779	-0.544919
GATA1	0.0315957	0.440779	0.571792
EVI2A	0.0316238	0.440779	-0.515909
CLK1	0.0316356	0.440779	-0.591195
RP11-116O18.1	0.0317446	0.441262	0.320814
ATP6AP1	0.0318171	0.441262	0.598105
SERPINE2	0.0318313	0.441262	0.498699
NSUN3	0.0319163	0.441262	-0.574898
PLA2G16	0.0319372	0.441262	-0.567356
DFFB	0.0319378	0.441262	-0.436139
TRIM37	0.0319666	0.441262	-0.594833
RAD23B	0.0319887	0.441262	-0.280599
LGALS8	0.0319964	0.441262	-0.356598
CYP2B6	0.0319968	0.441262	-0.412379
SIRT6	0.0320707	0.441831	0.545921
DYNC1LI2	0.0321637	0.442661	-0.420017
ARL1	0.0323333	0.444369	-0.411014
FBXL4	0.0323699	0.444369	-0.454704
PHF11	0.0324083	0.444369	-0.830147
MAP2K2	0.0324346	0.444369	0.357489
ADAM3B /// ADAM3B	0.0324522	0.444369	0.292098
TMEM39B	0.0325353	0.444403	0.402547
ACR	0.0325471	0.444403	0.636446
LPIN2	0.0325603	0.444403	-0.705919
TCOF1	0.0325863	0.444403	-0.299266
TACR2	0.0328016	0.446781	0.400754
TAS2R16	0.0328268	0.446781	0.506791
CHAT	0.0329321	0.447764	0.989183
PRDM14	0.033047	0.448207	0.653263
ASMT	0.0330804	0.448207	-0.294095
GPR18	0.0330809	0.448207	-0.553319
AMD1	0.0331154	0.448207	-0.342219
CNPY3	0.0331305	0.448207	-0.744523
MORC4	0.0333004	0.44923	0.319412
R3HDM4	0.0333199	0.44923	-0.548113
ELF4	0.0333376	0.44923	-0.498297
RGS3	0.0333391	0.44923	0.532566
SEMG1	0.0334028	0.449551	0.402159
AF198444	0.0334294	0.449551	-0.408911
OLR1	0.0336569	0.451595	0.344915
PRKAR2A	0.0336743	0.451595	0.271146
MAVS	0.0337745	0.451595	-0.515353
T-Cell Receptor V-alpha region /// TRAV9-2 /// TRAV9-2	0.0337963	0.451595	0.488975
GSDMB	0.0338093	0.451595	-0.423537
PARD6B	0.0338205	0.451595	0.335488
PDZD7	0.0338263	0.451595	0.700549
MYO1D	0.0338994	0.451595	0.305105
TFDP3	0.033957	0.451595	0.584919
RAPGEF5	0.0339587	0.451595	0.384751
ETNPPL	0.0339595	0.451595	0.457694
CNN3	0.0340351	0.451595	-0.510805
RPL26L1	0.034038	0.451595	0.496816
CELF1	0.0341004	0.451595	-0.466063
CD93	0.0341086	0.451595	0.347331
RAD51D	0.0341212	0.451595	0.312937
MAP1S	0.0341495	0.451595	0.34026
CKLF	0.0342226	0.452119	-0.40825
PFN1	0.0343813	0.4533	0.719068
GREM1	0.0344003	0.4533	0.351553
FLRT2 /// LOC100506718	0.0344281	0.4533	0.37161
VIL1	0.0344461	0.4533	0.531724
NDC1	0.0345149	0.45371	0.396491
LINC00588	0.0346658	0.45371	0.400626
IQCJ-SCHIP1 /// SCHIP1	0.0346766	0.45371	0.320826
OCM2	0.0346974	0.45371	0.605462
ACE	0.0347003	0.45371	-0.366531
ACKR4	0.0347064	0.45371	0.46392
EMP2	0.034752	0.45371	0.638898
PRDM10	0.0348097	0.45371	-0.421519
ATP8B4	0.0348417	0.45371	-0.480048
OR1E3 /// OR1E3	0.0348877	0.45371	-0.458459
H2AFX	0.0348979	0.45371	0.213732
MYOF	0.0349026	0.45371	-0.390009
SLC43A3	0.0349318	0.45371	-0.360017
SHARPIN	0.0350622	0.45371	-0.687925
PMAIP1	0.0350735	0.45371	-0.831146
RAD9A	0.0350757	0.45371	-0.733912
KPNA3	0.0351937	0.45371	0.331683
CD68 /// LOC101928634 /// SNORA67	0.0352014	0.45371	-0.667242
RGCC	0.0352025	0.45371	-0.714038
ARHGEF3	0.0352178	0.45371	-0.540488
ADAM19	0.0352674	0.45371	-0.279591
SERP1	0.0353121	0.45371	-0.822671
BACE2	0.0353219	0.45371	0.711525
PP13	0.0353269	0.45371	0.695529
GPR176	0.0353358	0.45371	-0.57587
IGHG1 /// IGHG2 /// IGHM /// IGHV4-31 /// MIR8071-1 /// MIR8071-2	0.0353589	0.45371	0.809771
CA4	0.0353837	0.45371	0.544284
EAPP	0.0354917	0.454664	-0.841425
HCG26	0.0356101	0.455268	-0.458007
SPTAN1	0.0356342	0.455268	0.362272
DIO1	0.0356399	0.455268	0.690098
IGH /// IGHA1 /// IGHA2 /// IGHD /// IGHG1 /// IGHG2 /// IGHG3 /// IGHM /// IGHV4-31	0.0357003	0.455609	0.998248
UTP3	0.03574	0.455685	-0.66985
AHSA2	0.0358024	0.455999	-0.41315
TIMM17B	0.0358843	0.455999	-0.572081
LPL	0.0359186	0.455999	0.477819
MAGEB1	0.0359603	0.455999	0.610796
MC5R	0.0359803	0.455999	0.489893
THOC7	0.0360185	0.455999	-0.683769
UBBP2 /// UBBP2	0.0360201	0.455999	-0.746081
WDR5B	0.0360433	0.455999	0.338127
RBX1	0.0360683	0.455999	-0.687554
BAZ2A	0.0362273	0.456614	0.369043
IGK	0.0362286	0.456614	1.25285
RNASEH1	0.0362562	0.456614	-0.395272
COPS4	0.036269	0.456614	-0.518883
RBMXL2	0.0363608	0.456614	0.47778
VAMP7	0.0363754	0.456614	-0.53667
RRN3P1	0.0363838	0.456614	0.394436
SAMD9	0.0363872	0.456614	-0.657078
FOXD1	0.0364708	0.45697	0.375323
C19orf57	0.0364832	0.45697	0.68808
COL9A2	0.0366341	0.458135	0.548367
MFSD10	0.0366635	0.458135	-0.712053
MRPL41	0.036678	0.458135	0.967664
SNRPB2	0.0368902	0.459032	-0.676959
RPL29	0.0369061	0.459032	0.509787
HNRNPH1	0.0369205	0.459032	-0.294866
NR1I2	0.0369249	0.459032	0.585003
CXXC4	0.0369447	0.459032	0.587686
WHSC1L1	0.0370174	0.459032	0.336173
METRN	0.037031	0.459032	0.774175
TP53TG5	0.0370536	0.459032	0.36131
ACAN	0.0371134	0.459032	-0.336439
PITPNM1	0.0371383	0.459032	-0.702768
PLOD2	0.0371531	0.459032	0.311606
IGF2R	0.0371868	0.459032	0.599103
KCNA3	0.0371913	0.459032	0.391494
ZKSCAN1	0.0373849	0.461001	0.497919
PPP1R12B	0.0374527	0.461416	-0.337019
BOP1 /// MIR7112	0.0375929	0.462722	0.310393
C11orf58	0.0377328	0.46402	-0.688547
GPATCH4	0.0378296	0.464376	0.276111
KIF16B	0.037871	0.464376	-0.549196
IL4R	0.0378735	0.464376	0.47305
FOXF2	0.0378991	0.464376	0.55874
TPSB2	0.0380185	0.465417	0.597092
SPTSSA	0.0380952	0.465933	-0.436822
EIF3H	0.0381874	0.466639	0.525652
SLCO3A1	0.0383471	0.468167	-0.537907
ID2B	0.038514	0.469781	0.353141
YIF1A	0.0385875	0.469813	-0.562728
MYEF2	0.0386285	0.469813	-0.397577
CCDC40	0.0386724	0.469813	0.446203
LINC00894	0.0386808	0.469813	0.593317
NME5	0.0386905	0.469813	0.631722
RGP1	0.0388033	0.470518	0.793806
MX2	0.0388182	0.470518	-0.763422
FOXO1	0.0388693	0.470535	-0.484537
CTH	0.0389224	0.470535	-0.348098
HLA-DQA1 /// HLA-DQA2 /// LOC100509457	0.038924	0.470535	-0.543893
TEX28	0.0390151	0.470747	0.498181
WISP3	0.0390372	0.470747	0.532483
SH3BP4	0.0391028	0.470747	-0.435211
TNFSF13	0.0391282	0.470747	-0.524236
ABLIM3	0.0391448	0.470747	0.525128
SPIB	0.0391846	0.470747	0.423903
LOC102723620	0.0392304	0.470747	0.493218
HIST1H4G	0.0392481	0.470747	-0.289714
LAMTOR3	0.039255	0.470747	-0.559411
NT5C2	0.0394461	0.472108	-0.624749
ALG11 /// UTP14A /// UTP14C	0.0394684	0.472108	0.485324
CGGBP1	0.0394733	0.472108	0.530021
CD1C	0.0397547	0.474917	-0.632394
LOC101060604 /// SLC7A5P1 /// SLC7A5P2 /// SMG1P3	0.0397933	0.474917	-0.51025
ELOVL2	0.0398137	0.474917	0.325818
VAMP3	0.0399192	0.475193	-0.326912
EIF1B	0.0399698	0.475193	-0.636355
STRA6	0.0399729	0.475193	0.370429
NDUFS7	0.0399774	0.475193	-0.465096
RGS14	0.0400382	0.475498	-0.370016
RHPN1-AS1	0.0401359	0.47624	-0.302638
GTF3C5	0.0402948	0.477705	0.767247
TAPBPL	0.0403977	0.477873	-0.423505
RAB32	0.0404548	0.477873	0.425985
HBBP1	0.0404569	0.477873	-0.687657
PEX5	0.0405162	0.477873	0.37638
KAT7	0.0405539	0.477873	0.47335
RIC8B	0.0405685	0.477873	-0.546103
HABP2	0.0405821	0.477873	0.570642
EXOSC4	0.0405918	0.477873	0.306919
TRPV2	0.040675	0.478084	-0.456606
LOXL2	0.04082	0.478084	0.377654
LOC101928061 /// SERP1	0.0408224	0.478084	-0.308021
MPP3	0.0408546	0.478084	-0.415903
HDGFRP3	0.0408969	0.478084	0.275915
GALNT8 /// KCNA6	0.0409645	0.478084	0.685617
MTMR11	0.0410129	0.478084	-0.713253
HOXA4	0.0410361	0.478084	-0.548312
LGI1	0.0410433	0.478084	0.361389
CRHR1	0.0411165	0.478084	0.388945
MLST8	0.0411172	0.478084	-0.6144
SETD3	0.0411178	0.478084	-0.600447
ZNF771	0.0411897	0.478084	-0.294034
PLA1A	0.0412202	0.478084	0.482985
BTF3	0.041274	0.478084	-0.513928
PIAS3	0.0412992	0.478084	0.470104
BLVRA	0.0413731	0.478084	-0.329653
GADD45G	0.0413857	0.478084	0.636958
EMCN	0.0413919	0.478084	0.431389
DYM	0.0413999	0.478084	0.351052
RPL21 /// RPL21P28 /// SNORA27 /// SNORD102	0.0414132	0.478084	0.379051
LYRM1	0.041427	0.478084	-0.552049
HHEX	0.0414395	0.478084	-0.452313
VASH1	0.0414587	0.478084	-0.381092
ERBB2	0.0415285	0.478265	0.354762
POLR1D	0.0415728	0.478265	-0.584074
CAPZB	0.0416293	0.478265	0.31853
C11orf68	0.0416682	0.478265	-0.605172
BMI1 /// COMMD3-BMI1	0.0416812	0.478265	-0.472295
ICMT	0.0416961	0.478265	-0.398937
LARGE	0.0417546	0.478265	0.334035
POLE3	0.0417575	0.478265	-0.428194
NLK	0.0418051	0.478405	-0.717612
TAP2	0.0419336	0.479117	-0.344631
RP11-348B17.1	0.0419836	0.479117	0.500488
SCN10A	0.0420074	0.479117	1.03866
DSC1	0.0420091	0.479117	0.357226
DGCR6L	0.042121	0.479636	-0.321712
BTN3A1	0.0421587	0.479636	-0.336541
MRPS31	0.0421611	0.479636	-0.499767
AMN	0.0423789	0.481708	0.526072
AK291611 /// TRGV7 /// TRGV7	0.042482	0.482474	0.453835
IGH /// IGHA1 /// IGHA2 /// IGHG1 /// IGHG2 /// IGHG3 /// IGHM /// IGHV4-31 /// LOC102725526	0.0425931	0.483189	1.01355
PNISR	0.0426165	0.483189	-0.398878
F8A1 /// F8A2 /// F8A3	0.0428578	0.484745	0.486183
SEC14L5	0.0428724	0.484745	0.361838
SPATA31C2	0.0428928	0.484745	0.209429
NAT10	0.0429068	0.484745	0.298464
COMMD3	0.0429822	0.484745	0.503198
ERF	0.0429937	0.484745	-0.552438
SLC22A18AS	0.0430433	0.484745	0.317026
CYP2C18	0.0431608	0.484745	0.336016
STX10	0.04318	0.484745	0.700656
CRYGB	0.0432131	0.484745	-0.528993
ARHGAP26	0.0432949	0.484745	-0.381366
LMO3	0.0433194	0.484745	0.913022
CLK2	0.0433446	0.484745	-0.562086
STAU1	0.0433497	0.484745	-0.284568
CD5	0.0433768	0.484745	0.68856
KDM6A	0.0433811	0.484745	-0.3611
RNPEP	0.0433892	0.484745	-0.459531
BZW1	0.0434367	0.484745	-0.398798
PLSCR2	0.04349	0.484745	-0.574294
SCN3B	0.0434937	0.484745	0.352625
FAM224A	0.0435069	0.484745	0.346012
HNF1B	0.0435833	0.485197	0.601544
GPR56	0.0437168	0.486046	-0.451567
DMXL2	0.0437832	0.486046	-0.380237
ZBED2	0.0439017	0.486046	0.365116
NR1I3	0.0439081	0.486046	0.411874
PRND	0.0439397	0.486046	0.452772
AOX1	0.0439408	0.486046	0.252341
CASP4	0.0439506	0.486046	-0.372543
JADE3	0.0439766	0.486046	-0.416771
KDM6B	0.0439833	0.486046	0.484927
MAGED1	0.0441539	0.487302	0.580566
ALG5	0.0441906	0.487302	-0.3961
LRRC16A	0.0442051	0.487302	0.396922
SMS	0.0442596	0.487505	-0.37583
MROH9	0.0443356	0.487779	0.350193
SEC62	0.044388	0.487779	-0.833359
ERV3-2	0.0444164	0.487779	-0.859618
GTF2F1	0.0444534	0.487779	-0.249364
BCL3 /// MIR8085	0.0444896	0.487779	0.552894
MMP9	0.0445433	0.487779	1.05117
SERPINB9	0.0445745	0.487779	-0.39627
GBAP1 /// LOC100510710	0.0445895	0.487779	-0.618885
EPPK1	0.0446657	0.487779	0.564319
DNASE2	0.044701	0.487779	-0.517636
NXPH3	0.044728	0.487779	-0.5111
RPL18	0.0447735	0.487779	-0.305507
DCSTAMP	0.044787	0.487779	0.870253
CDT1	0.0449487	0.487779	0.472528
HAGH	0.0450003	0.487779	-0.482105
MMP11	0.0450301	0.487779	0.523207
RNF38	0.045042	0.487779	0.263006
THOP1	0.0450617	0.487779	-0.486311
WNT8B	0.0450798	0.487779	-0.293034
YIPF4	0.0451317	0.487779	-0.279664
TSEN34	0.0451839	0.487779	-0.439115
ZCCHC8	0.0451938	0.487779	-0.432366
CENPM	0.045216	0.487779	0.677717
RHBDF1	0.0452379	0.487779	-0.497779
WDR11	0.045253	0.487779	-0.547821
DPH2	0.045275	0.487779	-0.528713
AGPAT3	0.0452833	0.487779	-0.569191
KDELR3	0.0453193	0.487779	0.341802
CSNK1E /// CSNK1E	0.0453311	0.487779	0.384875
STAM2	0.04552	0.489361	-0.262302
RPAP3	0.0455793	0.489361	-0.319277
RPL39L	0.0456168	0.489361	-0.464286
EIF4H	0.0456983	0.489361	0.346294
FBXO2	0.0457388	0.489361	-0.545959
RPP38	0.0458056	0.489361	-0.510245
PACS2	0.0458358	0.489361	-0.588924
SLMO2	0.0458362	0.489361	-0.498253
CCL27	0.04588	0.489361	0.501191
DOLPP1	0.0459003	0.489361	0.368965
ERO1LB	0.0459634	0.489361	0.595232
SERPING1	0.0459775	0.489361	-0.817858
LOC100506282	0.0459794	0.489361	-0.315631
CCDC15	0.0459851	0.489361	0.28849
NDUFB6	0.0460669	0.489846	-0.403577
NDST2 /// ZSWIM8-AS1	0.0461751	0.490097	0.557797
LOC101927458 /// LPHN2	0.046249	0.490097	0.340591
PI3	0.0462614	0.490097	0.84085
THTPA	0.046277	0.490097	-0.614254
P2RY13	0.0463038	0.490097	-0.529181
NFIX	0.0463367	0.490097	-0.896089
CCND3	0.0463957	0.490097	0.40912
EIF2AK1	0.0464116	0.490097	-0.516442
CERS4	0.0464169	0.490097	0.455821
ZNF669	0.046477	0.490348	0.752068
MME	0.0466487	0.49161	-0.814249
CD2	0.0466958	0.49161	0.557929
CNOT6	0.0468132	0.49161	-0.344582
FPR3	0.0469389	0.49161	-0.613304
OR2B2	0.0470141	0.49161	0.331987
CDC42EP1	0.0470663	0.49161	-0.593048
MSH5-SAPCD1 /// SAPCD1	0.0470725	0.49161	-0.324774
PCGF1	0.0470889	0.49161	-0.501006
TMEM248	0.0470903	0.49161	-0.623336
UBR2	0.0472391	0.49161	-0.292128
PRPF4	0.0472489	0.49161	-0.504679
PTCRA	0.04725	0.49161	-0.356305
SLFN12	0.0472588	0.49161	-0.448927
CYLC2	0.0472815	0.49161	0.327822
PNMA2	0.0473455	0.49161	0.387711
AIDA	0.0474381	0.49161	-0.474622
LOC100506699	0.0474395	0.49161	0.332134
LOC730101	0.0475134	0.49161	0.486205
INHBB	0.0475137	0.49161	-0.48102
CYP2C9	0.0475335	0.49161	0.436508
COX10	0.0476637	0.49161	0.423233
IL22RA1	0.0477171	0.49161	0.428659
MPZL1	0.047729	0.49161	-0.340156
TSPY13P /// TSPY13P	0.0477342	0.49161	0.480009
LOC101928274 /// VSIG10	0.0477345	0.49161	0.34611
PTBP1	0.047747	0.49161	0.258587
MATN4	0.0477698	0.49161	0.432174
SERINC1	0.0478424	0.49161	-0.71889
B4GALT3	0.0478663	0.49161	-0.627609
ALDH9A1	0.0479155	0.49161	0.338861
MAX	0.0479442	0.49161	-0.408769
MFAP3	0.0479586	0.49161	-0.396023
ARFIP1	0.0479713	0.49161	-0.441071
YAF2	0.0480187	0.49161	-0.455816
THOC1	0.0480235	0.49161	-0.676107
FAM160B2	0.0480597	0.49161	0.338535
SACM1L	0.0480617	0.49161	-0.683625
TRMT61A	0.0480727	0.49161	-0.340286
INHA	0.0481156	0.49161	0.632777
SETD4	0.048125	0.49161	0.373979
RALBP1	0.0481315	0.49161	-0.489155
ADIPOR1	0.0481503	0.49161	-0.58782
NRXN1	0.0482141	0.49161	0.257472
GPR116	0.0483171	0.49161	0.272303
ANKRD10-IT1	0.0483426	0.49161	-0.479785
SOX12	0.0483915	0.49161	0.369985
RCE1	0.0484136	0.49161	-0.350976
CLSTN2	0.0484361	0.49161	0.457849
MMACHC	0.0484451	0.49161	-0.437544
SOX9	0.0484688	0.49161	0.345244
HK3	0.048469	0.49161	0.473801
GPX2	0.0485205	0.49161	-0.729496
ENOX1	0.0486144	0.49161	0.505024
CFP	0.0486253	0.49161	-0.910632
DNPEP	0.0486405	0.49161	-0.401503
MC3R	0.0487428	0.49161	-0.374616
LOC441601	0.0487526	0.49161	0.495704
LSM7	0.0488219	0.49161	-0.538186
SUCLA2	0.0488279	0.49161	-0.366502
UBFD1	0.0488656	0.49161	-0.464123
ZFP69B	0.048989	0.49161	0.511986
2003-03-01	0.0490112	0.49161	-0.323185
SLC5A7	0.0490258	0.49161	-0.369873
ACSL6	0.0490284	0.49161	-0.285053
CXorf40A	0.049035	0.49161	-0.40555
CTB-176F20.3	0.049127	0.49161	0.685421
RALGPS2	0.0491924	0.49161	-0.323291
XAF1	0.0492348	0.49161	-1.17822
FZD6	0.0492441	0.49161	0.339239
KLHDC3	0.0492553	0.49161	0.481131
PRDM16	0.0492772	0.49161	-0.467431
ZNF91	0.0492776	0.49161	-0.543566
HCFC2	0.0492982	0.49161	-0.456893
CPN2	0.0493441	0.49161	0.583238
CKAP2 /// IGLC1 /// IGLJ2 /// IGLJ2 /// IGLJ3 /// IGLJ3 /// IGLJ3 /// IGLV1-44 /// IGLV2-14 /// IGLV@	0.0494179	0.49161	0.802195
GDE1	0.0495502	0.49161	-0.384205
DSCR3	0.0496144	0.49161	-0.277824
CKB	0.0496382	0.49161	-0.497524
ERMAP	0.0496487	0.49161	-0.701312
DNAJA4	0.049738	0.49161	0.71713
C6orf47	0.0497541	0.49161	0.512023
GNG3	0.0497651	0.49161	-0.773861
GCAT	0.0497976	0.49161	-0.292312
MAP4K5	0.0498748	0.49161	-0.313966
PARP8	0.0499263	0.49161	-0.322222
PIM2	0.0499297	0.49161	0.711554
CINP	0.0499465	0.49161	-0.261132
UBA52	0.0499529	0.49161	-0.344248
NUP98	0.0499878	0.49161	-0.410931
DCP1A	0.0500643	0.49161	-0.286479
RIN1	0.0501191	0.49161	-0.420345
RAB5B	0.0501549	0.49161	0.411389
TDRD3	0.0502049	0.49161	0.415247
EPPIN /// EPPIN-WFDC6	0.0502435	0.49161	0.336745
G6PC2	0.0502619	0.49161	0.499733
CARD9 /// DNLZ	0.050313	0.49161	-0.433577
C2orf44	0.0503557	0.49161	0.515474
PRDX3	0.0503785	0.49161	-0.313214
BRS3	0.0504532	0.49161	0.614463
RGS5	0.0504698	0.49161	0.351587
IGH /// IGHA1 /// IGHA2	0.0504904	0.49161	0.854659
MYOG	0.0505733	0.49161	-0.485668
TRAK1	0.0506627	0.49161	-0.310818
VAMP2	0.0507178	0.49161	0.507078
EDAR	0.0507328	0.49161	0.379967
ABCC1	0.0507546	0.49161	0.331835
GAS2L1	0.0507603	0.49161	0.292526
ZNF529	0.0507959	0.49161	-0.366795
ATF3	0.050824	0.49161	-0.430516
GOLGA6L4 /// GOLGA6L5P /// GOLGA6L9 /// LOC102724093	0.0508662	0.49161	0.335417
MSL1	0.0509102	0.49161	0.482962
PSMG2	0.0509199	0.49161	-0.464545
PLK1	0.0509212	0.49161	0.595046
NEUROD1	0.0509493	0.49161	0.46149
RP11-680C21.1	0.0509856	0.49161	0.479228
CTC-428G20.3	0.0509857	0.49161	-0.389696
SLC6A8	0.0510034	0.49161	-0.671539
TMEM140	0.0510316	0.49161	-0.534738
CAMKMT	0.051035	0.49161	0.527384
GRIN2A	0.0510504	0.49161	0.603595
TCRA /// TRAV8-6 /// TRAV8-6	0.0510975	0.49161	0.609965
UXT	0.0511382	0.49161	-0.37195
CXCL1	0.0512025	0.49161	-0.370988
TBC1D8	0.0512222	0.49161	0.28006
SUMO3	0.0512347	0.49161	-0.263611
DYNLL1	0.0512598	0.49161	-0.587574
CLN3	0.0512824	0.49161	-0.420272
CPPED1	0.0513134	0.49161	-0.40191
RAP2C	0.0513262	0.49161	-0.594991
LINC00939	0.0513333	0.49161	-0.276408
CSNK1G2	0.0513617	0.49161	-0.418098
NOL12	0.0514516	0.492122	0.422672
DAPP1	0.0515256	0.492377	-0.41948
PARP12	0.0515973	0.492377	-0.497623
TNS1	0.0516187	0.492377	-0.501152
CHMP4A /// TM9SF1	0.051624	0.492377	-0.40475
TUBGCP5	0.0517195	0.49294	0.395596
NDST1	0.051931	0.494607	-0.315607
NDUFS1	0.0520138	0.495047	0.321133
PNRC2	0.0521324	0.495562	-0.432317
FUCA1	0.0521535	0.495562	-0.681826
PLSCR1	0.052178	0.495562	-0.741519
LIG1	0.0522716	0.496103	0.268305
ANPEP	0.0523328	0.496166	0.429467
MFSD11	0.0523517	0.496166	0.405505
NOTCH4	0.0523958	0.496179	0.722433
UBB	0.0524265	0.496179	-0.373753
FMO1	0.0524838	0.496374	-0.366824
NIPA2	0.0525812	0.49646	-0.774197
CD79A	0.05261	0.49646	0.572241
KALP /// KALP	0.0526134	0.49646	0.467634
PLAUR	0.0526946	0.49646	-0.411798
SYK	0.0527129	0.49646	0.412165
CHODL	0.05273	0.49646	0.366693
KIR2DS2	0.052828	0.49646	0.735681
N4BP2L2	0.052853	0.49646	-0.408852
SLC12A3	0.0528862	0.49646	-0.271008
CDIP1	0.052893	0.49646	-0.350379
ONECUT1	0.0529435	0.49646	0.422635
PIGL	0.0529559	0.49646	-0.327782
SATB1	0.0529704	0.49646	-0.563908
MXI1	0.0530421	0.496697	-0.613768
TRDN	0.0530692	0.496697	0.29318
BATF	0.0531351	0.496969	-0.413807
LIME1 /// ZGPAT	0.0532577	0.497772	0.35381
HIST1H2BO	0.0533792	0.498493	-0.467808
ACTR10	0.0534123	0.498493	-0.586869
PEX14	0.0534885	0.498493	-0.405359
HUWE1	0.0535851	0.498493	0.309559
SNX10	0.0536679	0.498493	-0.449806
FAM50A	0.0536891	0.498493	-0.257456
PPIEL	0.0537499	0.498493	0.223913
RANGRF	0.053761	0.498493	-0.491073
FZD2	0.0537725	0.498493	-0.508694
COPG2IT1	0.0538279	0.498493	-0.335425
LCMT1	0.0538701	0.498493	0.474767
MSH3	0.0539126	0.498493	-0.369428
TTLL1	0.0539338	0.498493	0.403486
SMTN	0.0539571	0.498493	0.41769
TSPAN6	0.0539838	0.498493	0.3358
GNG7	0.0539843	0.498493	-0.373609
ZBTB25	0.0539869	0.498493	-0.597144
FAM20B	0.0540443	0.498493	-0.289815
SECISBP2	0.0541433	0.498493	-0.369959
ZNF254	0.0541656	0.498493	0.480243
AIP	0.0541675	0.498493	0.412128
MST1L	0.0541792	0.498493	0.450183
ADCY7	0.0541947	0.498493	-0.51807
RAB11FIP5	0.0542201	0.498493	-0.286301
PRPF4B	0.0542855	0.498755	-0.311596
BRAP	0.0545313	0.500401	-0.26803
LSM1	0.0546245	0.500401	-0.756514
ATP6V1E1	0.0546298	0.500401	-0.492026
DHCR7	0.0546483	0.500401	0.366411
ARMC4	0.0546498	0.500401	-0.562475
ZNF440	0.0548805	0.501372	0.475032
RPL36AL	0.0549052	0.501372	-0.562243
IMPAD1	0.0549266	0.501372	0.595843
ARHGAP24	0.0549942	0.501372	0.500595
CWF19L1	0.0550167	0.501372	-0.591097
SCFD1	0.0550383	0.501372	-0.53539
TMCO3	0.0550807	0.501372	0.324504
ZNF22	0.0550954	0.501372	-0.359326
RNPS1	0.0550972	0.501372	-0.496871
CST3	0.0551269	0.501372	-0.697024
CD300C	0.0552686	0.501731	-0.723458
TJP1	0.0552755	0.501731	0.336159
OPN3	0.0552777	0.501731	-0.251139
HPCAL4	0.0553164	0.501746	0.303638
PPIL2	0.0553722	0.501915	-0.335513
ZNF329	0.0554338	0.50202	0.328167
ATP5A1	0.0554804	0.50202	0.417684
MAPRE3	0.0554952	0.50202	0.31449
FGR	0.0555633	0.5023	0.305618
TM9SF3	0.0556127	0.50241	-0.339811
KCNN4	0.0557029	0.502707	0.636489
CCR5	0.05572	0.502707	0.636628
OSTM1	0.0558341	0.502802	-0.552102
GYS1	0.0558764	0.502802	0.343271
2001-12-01	0.0558769	0.502802	0.425431
LGALS3	0.0558952	0.502802	-0.737594
CUX1	0.0559164	0.502802	-0.276233
PRB4	0.0559855	0.502889	0.746356
EMC3	0.0560096	0.502889	-0.463756
IGK /// IGKC	0.056152	0.502889	0.438958
TSR1	0.0561556	0.502889	0.351515
LOC101929036 /// PAH	0.0561712	0.502889	-0.229211
CLUHP3	0.0562242	0.502889	-0.552486
GLRA2	0.0562854	0.502889	0.972225
LIPT1	0.0562992	0.502889	-0.393604
BEST1	0.0563417	0.502889	-0.397777
RPL36	0.0563622	0.502889	0.56515
CTAG2	0.0564015	0.502889	0.22692
SORL1	0.0564029	0.502889	0.537457
MCMBP	0.0564099	0.502889	-0.72803
DAZL	0.0564681	0.503076	0.657687
GPX1	0.0565482	0.503458	-0.793415
EIF2B1	0.0566035	0.503618	-0.725555
BTK	0.0566606	0.503795	-0.455979
TANK	0.0567205	0.503996	-0.274341
RPARP-AS1	0.0568174	0.504525	-0.252339
PCMT1	0.0569226	0.505071	-0.583514
ST13	0.0570587	0.505071	-0.333223
DNAJB14	0.0570788	0.505071	-0.622756
PPP2R5B	0.0570835	0.505071	-0.384654
NECAP2	0.0571671	0.505071	-0.328751
CDC42EP2	0.0572338	0.505071	-0.303545
EPS8L2	0.0572355	0.505071	0.51863
CENPF	0.0572391	0.505071	0.312047
COL6A2	0.0572856	0.505071	0.370505
BTN3A3	0.0573298	0.505071	-0.378239
GIMAP6	0.0573391	0.505071	-0.546114
KMT2A /// LOC101929115	0.0573472	0.505071	0.431302
PARP1	0.0574039	0.505071	0.394232
FBXO7	0.0574222	0.505071	-0.619717
USPL1	0.0574475	0.505071	0.602047
CYP3A7-CYP3AP1	0.0575115	0.505071	0.31897
TARDBP	0.0575142	0.505071	-0.323829
STATH	0.0576019	0.505135	-0.425648
RBM7	0.0576122	0.505135	-0.307695
ARPC5L	0.0576393	0.505135	0.488351
HIST1H4H	0.057671	0.505135	-0.382892
BCAR3	0.0577457	0.505462	-0.331816
MYO5C	0.0578553	0.506093	0.370445
SNORA21	0.0579407	0.506459	0.394751
OSGIN2	0.0579721	0.506459	0.273489
EPHB1	0.0580727	0.506762	0.50528
CLEC5A	0.0581389	0.506762	0.37799
MEGF9	0.0581459	0.506762	-0.53351
RPL3L	0.0582326	0.506762	-0.542043
CSF2	0.0583636	0.506762	-0.317115
AL928768.3 /// Ig alpha 1-[alpha]2m /// IGH	0.0583841	0.506762	0.546912
ZKSCAN8	0.0584362	0.506762	0.432142
MRPL48	0.0584432	0.506762	-0.689745
LOC100996325	0.058483	0.506762	0.327739
PHF20	0.0584944	0.506762	0.243775
TRIL	0.0585298	0.506762	0.362577
NDUFA10	0.0585441	0.506762	0.294977
ABCB1	0.0585929	0.506762	0.354815
PPP2R3C	0.0585931	0.506762	-0.508453
LOC100272216	0.0585973	0.506762	0.645793
NUDT1	0.0587318	0.506762	0.482678
GK	0.0587646	0.506762	-0.365448
LRIF1	0.05882	0.506762	-0.303442
PRKCI	0.0588423	0.506762	0.284725
PSMB8	0.0588508	0.506762	-0.536128
LOC102724788 /// PRODH	0.0588637	0.506762	-0.580882
ADAMTS9	0.0588671	0.506762	0.265624
PROSER1	0.0588692	0.506762	0.306905
ATMIN	0.0589475	0.507012	-0.461199
NTN1	0.0589732	0.507012	0.443242
LINC00921 /// ZNF263	0.0590961	0.507041	-0.51779
RFX4	0.0591475	0.507041	0.335594
GALK1	0.0591798	0.507041	-0.288611
NPAT	0.0592245	0.507041	0.272395
PERP	0.0592553	0.507041	0.386678
SPI1	0.0592779	0.507041	0.842516
ARL4A	0.0593309	0.507041	-1.18887
CLTCL1	0.0593781	0.507041	-0.687268
POLR2E	0.0593896	0.507041	0.423217
HMGN1 /// LOC101927733	0.0594318	0.507041	0.282558
ACSBG2	0.0594545	0.507041	0.710989
RP1-181J22.1	0.0594636	0.507041	0.431762
IER3	0.0594766	0.507041	0.522265
PLEK	0.059533	0.507041	-0.312783
DLL3	0.0595473	0.507041	0.611104
RAD51AP1	0.0595769	0.507041	-0.459754
CD2AP	0.0597357	0.507697	-0.543438
KCNMB3	0.0597404	0.507697	0.575254
WISP2	0.0597938	0.507697	0.445765
HIST1H1A	0.0598042	0.507697	0.438439
IFI35	0.0598937	0.508138	-0.728693
ABCD1	0.0599724	0.508186	0.550905
JAK2	0.0599746	0.508186	-0.409986
SLC38A4	0.060045	0.508464	0.238458
2011-09-01	0.0601256	0.508828	0.235878
CLU	0.0602331	0.509108	0.368333
FEN1	0.0602341	0.509108	0.364514
OIP5	0.0603545	0.509279	-0.503462
MYOZ1	0.0603939	0.509279	0.972702
COA7	0.0604498	0.509279	1.15884
GMPR	0.0604823	0.509279	-0.899872
ADPRH	0.0605514	0.509279	0.241108
EXD3	0.0605592	0.509279	-0.544248
DMBT1	0.0605734	0.509279	-0.37932
CDH17	0.0606431	0.509279	-0.365063
HOXA3	0.0606741	0.509279	0.25234
H2AFV	0.0607028	0.509279	0.330149
SHC1P1 /// SHC1P1	0.0607061	0.509279	0.50653
TRIM32	0.0607066	0.509279	0.313117
LRRC17	0.0608832	0.510243	0.583955
PRORY	0.0609166	0.510243	0.479073
IL18	0.0609718	0.510243	-0.427949
MUC1	0.0609724	0.510243	0.353516
SHCBP1L	0.0610359	0.510357	0.580757
ENO3	0.0610722	0.510357	-0.395967
KIF3B	0.0610994	0.510357	0.422677
LOC150776 /// SMPD4	0.0612243	0.511085	-0.39888
SCN1B	0.0613569	0.51179	-0.346421
TRRAP	0.0613845	0.51179	0.321237
UCKL1	0.061485	0.512312	-0.493149
ARHGAP10	0.0616997	0.513423	0.444526
NES	0.0617366	0.513423	0.504049
PRKCQ	0.0617627	0.513423	0.420612
PPM1F	0.0617703	0.513423	-0.335518
PTPN2	0.0618406	0.513691	-0.378697
PCDHB13	0.0619697	0.513787	0.27292
ATRAID	0.0619952	0.513787	-0.498747
LRRC8E	0.0620151	0.513787	-0.399328
PRKAA2	0.0620225	0.513787	0.371497
SRRM1	0.0620422	0.513787	0.384256
KCNB1	0.0620849	0.513826	0.397342
SERPINB4	0.0621693	0.514174	0.405517
APOLD1	0.0622338	0.514174	0.447898
GSR	0.0623144	0.514174	-0.492937
CDK5R2	0.0623264	0.514174	0.359064
APEX1	0.062373	0.514174	-0.286158
MXD3	0.062378	0.514174	0.263159
SST	0.0623933	0.514174	-0.36932
LRP8	0.0624408	0.514252	0.39204
ZSCAN31	0.0625566	0.514574	0.360269
POMZP3 /// ZP3	0.0625781	0.514574	0.507502
BDKRB2	0.0625941	0.514574	-0.435683
PHOX2B	0.0626346	0.514593	-0.347992
ZNF471	0.0627154	0.514945	0.407829
ADCK3	0.0627961	0.515088	-0.459239
GPR88	0.0628295	0.515088	0.274032
CX3CR1	0.0628472	0.515088	-0.602559
JAG1	0.0629965	0.515999	0.240407
IL7	0.0631417	0.516483	-0.350393
TG	0.0632484	0.516483	0.567606
ZFP36	0.0632948	0.516483	-0.516699
EVI2B	0.0633094	0.516483	-0.462213
CYP39A1	0.0633224	0.516483	0.438198
IGSF6	0.0633359	0.516483	-0.393569
WDR73	0.0633371	0.516483	0.359477
ORC4	0.0633614	0.516483	-0.274895
FKBP4	0.0634006	0.516491	0.411688
ACVRL1	0.0635197	0.516952	0.383667
GPSM2	0.0635336	0.516952	0.279976
POLG2	0.0637641	0.51705	-0.603464
EYA4	0.0637911	0.51705	-0.454366
SEMA3G	0.063837	0.51705	0.682958
SLC4A2	0.063899	0.51705	0.227182
FASTKD5	0.0639308	0.51705	-0.587441
PROX1	0.0640091	0.51705	0.538301
JRKL	0.0640206	0.51705	-0.452986
ACTN1	0.0640358	0.51705	0.44691
CTC1	0.0640491	0.51705	-0.458806
PLEKHB1	0.0640674	0.51705	0.513795
ITGB1BP2	0.0640749	0.51705	-0.332751
FAM212B /// LOC101928718	0.0640835	0.51705	0.770133
APOBEC2	0.0641442	0.51705	0.268926
TMEM222	0.0641506	0.51705	-0.550676
RPGRIP1	0.0641547	0.51705	0.426043
KIR2DL2	0.0641578	0.51705	0.756504
C2orf47	0.0642391	0.517305	-0.334228
CA2	0.064266	0.517305	0.906034
CDY1 /// CDY1B /// CDY2A /// CDY2B	0.0643808	0.517613	0.622511
TAS2R10	0.0643809	0.517613	0.380595
IFI16	0.0644593	0.517935	-0.520891
SP110	0.0645053	0.517997	-0.392256
DTWD1	0.0646315	0.518445	-0.444721
RNF114	0.0646455	0.518445	-0.373885
PTGIS	0.0646761	0.518445	0.287449
MLC1	0.0647824	0.518708	-0.426834
CD72	0.0648171	0.518708	-0.357703
ZBTB18	0.0648241	0.518708	-0.327226
CPA3	0.064905	0.519048	0.559249
NDUFA3	0.0650205	0.519664	-0.490278
RAB33B	0.0651197	0.520149	-0.530189
GPRC5B	0.0652268	0.520697	0.318292
CDC42EP3	0.0653436	0.521225	-0.30569
BAZ2B	0.0653731	0.521225	-0.262096
DDX24	0.0654369	0.521225	-0.332489
ZMIZ2	0.0654719	0.521225	0.253426
TMEM254	0.0654858	0.521225	0.418809
ABHD2	0.0656249	0.521711	0.410735
PRDX2	0.0656471	0.521711	-0.30899
ZNF365	0.0656626	0.521711	0.31255
PLA2G2A	0.0657433	0.521974	0.78112
TRAF1	0.065773	0.521974	0.493981
DSN1	0.0658972	0.522653	0.332241
LSS	0.0659688	0.522914	-0.266785
MAPK1	0.0661236	0.52334	-0.392613
CD63	0.0661284	0.52334	0.432146
GLI2	0.0661556	0.52334	-0.366304
GPKOW	0.0661848	0.52334	-0.427335
TIPIN	0.0662162	0.52334	-0.480361
RAD51	0.0662784	0.523526	0.354763
ZNF518A	0.0663567	0.523838	-0.382005
RCBTB2	0.0664977	0.524645	-0.442044
GABRB2	0.0666081	0.525209	0.859024
RNF40	0.0667315	0.525383	-0.24427
CDK5RAP2	0.0667545	0.525383	0.594101
PAX7	0.0668155	0.525383	-0.410301
SYNPO	0.0668314	0.525383	0.646362
MRPL28	0.066911	0.525383	-0.428384
IGHM	0.0669126	0.525383	0.494696
NAGPA	0.0669145	0.525383	-0.47124
TUBB4BP7 /// TUBB4BP7	0.0670066	0.525383	0.419166
PDCD1	0.0670394	0.525383	0.49128
CD22	0.0670999	0.525383	0.296744
HDAC6	0.0671227	0.525383	0.263138
TMPRSS15	0.0671342	0.525383	-0.293554
EMC6	0.0671355	0.525383	-0.403956
NCBP1	0.0672084	0.525469	0.24074
ITGAX	0.0672868	0.525469	0.446502
DYNC2H1	0.0673143	0.525469	-0.382656
RP11-209A2.1	0.0673342	0.525469	0.533298
FAM66D	0.0673409	0.525469	-0.393676
IGLC1 /// IGLJ3 /// IGLV2-14 /// IGLV@	0.0674388	0.525929	0.798122
PDE3A	0.0675447	0.526452	-0.35217
RETN	0.0676375	0.526465	0.763138
PTGR2 /// ZNF410	0.0676773	0.526465	-0.484677
ZNHIT1	0.0677022	0.526465	-0.545792
SEMA6A	0.0678264	0.526465	-0.215997
SLC34A2	0.0678303	0.526465	-0.485154
PRCP	0.0678584	0.526465	0.403845
TFEC	0.0678982	0.526465	-0.511606
RPS15A	0.0679925	0.526465	0.532563
ARPC3	0.0680225	0.526465	-0.576561
TMEM123	0.0680844	0.526465	-0.501562
ATG101	0.0680966	0.526465	0.521926
GCLC	0.0681009	0.526465	-0.645987
COL4A6	0.0681037	0.526465	0.335187
MECR	0.0681357	0.526465	0.387433
GMPS	0.0681899	0.526465	0.525636
WARS2	0.0682051	0.526465	-0.394266
NUDT3	0.0682219	0.526465	-0.367512
HILPDA	0.0682925	0.526465	0.495351
CYTH2	0.0682953	0.526465	0.272705
QPCT	0.068423	0.526465	-0.578687
AHSP	0.0684574	0.526465	-0.581631
AGTR1	0.068461	0.526465	0.35828
TMBIM6	0.0685702	0.526465	0.27436
CD33	0.0685781	0.526465	0.372486
FAM53B	0.0685885	0.526465	0.372772
NUDT4	0.0686259	0.526465	-0.275804
NR2F1	0.0686392	0.526465	0.336199
ZNF551	0.0686503	0.526465	0.269512
TCRDV2 /// TRDC /// TRDC /// YME1L1	0.0686761	0.526465	0.441531
POLB	0.0687183	0.52649	-0.492483
BMPR1A	0.0688094	0.526889	0.285522
SEMA4F	0.0688495	0.526898	0.307684
CPNE3	0.0689428	0.527115	0.337763
ZNF34	0.0689559	0.527115	0.366504
VAX2	0.0691559	0.52827	0.333049
POMC	0.0691852	0.52827	0.575508
MEX3D	0.0692243	0.52827	0.285873
NNAT	0.069316	0.528671	0.860015
SMYD2	0.0694349	0.528863	-0.439491
DGKE	0.0695214	0.528863	0.292804
ARMCX6	0.0695426	0.528863	0.257014
HERC6	0.0695918	0.528863	-0.755804
FEZ2	0.0695991	0.528863	-0.25957
ACTR3P2 /// ACTR3P2	0.0696283	0.528863	0.35032
AMPD3 /// CAND1.11	0.0696366	0.528863	0.542274
HIST1H2APS4 /// HIST1H2APS4	0.0696859	0.528863	0.252178
TICAM1	0.0696933	0.528863	0.298228
BFAR	0.0698073	0.528893	0.427965
PEAK1	0.0699259	0.528893	0.369312
ERGIC2	0.0699352	0.528893	-0.506758
CBX5	0.0699361	0.528893	-0.430057
RASAL1	0.0699488	0.528893	0.540545
GPATCH1	0.0699583	0.528893	0.421988
GPC3	0.0699712	0.528893	0.431603
ACIN1	0.0700707	0.529224	0.528455
IGF2 /// INS-IGF2	0.0702066	0.529224	-0.230562
FST	0.0702485	0.529224	-0.428306
CSTA	0.0702662	0.529224	-0.625454
HPCAL1	0.0703543	0.529224	0.433362
TENC1	0.0703944	0.529224	-0.558169
SLC6A1	0.0704358	0.529224	0.323761
MAPKAP1	0.0704606	0.529224	-0.31327
FAM60A	0.0705248	0.529224	-0.259995
TTLL12	0.0705993	0.529224	0.377425
SPINT1	0.0706095	0.529224	0.390469
VPS54	0.0706488	0.529224	-0.615231
PRCC	0.0706707	0.529224	-0.442257
DHX16	0.0707358	0.529224	-0.423467
ITPR3	0.0707795	0.529224	-0.343185
ELAVL4	0.0707956	0.529224	-0.584719
MIR4746 /// UBXN6	0.0708164	0.529224	-0.702066
CRTAM	0.0708383	0.529224	-0.378021
MINOS1P1	0.0708695	0.529224	0.347783
TAF12	0.0708726	0.529224	-0.389949
EPX	0.0708883	0.529224	0.727819
ZNF670 /// ZNF670-ZNF695 /// ZNF695	0.0709335	0.529224	0.448234
SPRR3	0.0709367	0.529224	0.312876
LOC101930112 /// SPG7	0.071008	0.529224	-0.457098
NEFM	0.0710141	0.529224	0.693822
ANAPC15	0.0710331	0.529224	0.354248
KCNK7	0.0711963	0.529968	-0.248102
CD79B	0.0712228	0.529968	0.380016
ATP8A1	0.0712506	0.529968	0.458155
KIAA1661	0.07164	0.532339	0.316574
C17orf53	0.0716845	0.532339	0.396327
SNAP25	0.0717509	0.532339	0.3369
PTRF	0.0717522	0.532339	0.228827
DTX4	0.0717663	0.532339	0.388241
PRPS1L1	0.0718414	0.532391	0.498723
HAVCR1	0.0718872	0.532391	0.36951
TGM3	0.0718915	0.532391	-0.416526
RBM6	0.0719788	0.532603	-0.351594
GABRA4	0.071999	0.532603	-0.249224
FAM118A	0.0721072	0.533112	-0.314557
CDC42	0.0721647	0.533116	-0.370965
BCL10	0.0723997	0.533116	-0.525085
ZWILCH	0.0724614	0.533116	0.540208
LOC93432	0.0724821	0.533116	0.417886
LRRC3	0.0725044	0.533116	-0.293549
RORC	0.0725349	0.533116	-0.722959
FAM86B1 /// FAM86B2 /// FAM86C1 /// FAM86DP /// FAM86FP	0.0725956	0.533116	-0.357414
BCAM	0.0726103	0.533116	0.501507
LILRA5	0.0726201	0.533116	-0.449277
SCAI	0.0726338	0.533116	-0.28483
CYTL1	0.0726527	0.533116	0.375356
GSTM1	0.0726611	0.533116	0.545998
MAPK1IP1L	0.0726615	0.533116	-0.345346
TRIP10	0.0726769	0.533116	0.257295
BTBD2	0.0726994	0.533116	0.517732
TRABD	0.0728761	0.533532	0.267824
MUC7	0.0729545	0.533532	0.277535
RPS12	0.0730498	0.533532	-0.237322
CA10	0.0730538	0.533532	0.349712
ISG20	0.0730591	0.533532	-0.571314
OR2H2	0.0730597	0.533532	0.323474
TP53I3	0.0731543	0.533532	0.559382
CERS2	0.073161	0.533532	0.491434
GBAS	0.0732227	0.533532	-0.470798
TNK1	0.0732247	0.533532	0.445824
ZEB2	0.0733036	0.533532	-0.373874
NR0B2	0.073317	0.533532	0.798707
PDE2A	0.073342	0.533532	-0.523006
IL27RA	0.0733591	0.533532	-0.252428
KIAA1033	0.0734228	0.533532	-0.369595
AMMECR1	0.0734411	0.533532	-0.312183
FCF1 /// MAPK1IP1L	0.0734691	0.533532	-0.644135
MORC1	0.0735435	0.533532	0.400822
GALNS	0.0735495	0.533532	-0.521858
ITGB4	0.0736762	0.533532	0.254629
SEPHS2	0.0736853	0.533532	-0.393952
ERVMER34-1	0.0736965	0.533532	0.360751
DBN1	0.0737	0.533532	0.40105
SCCPDH	0.073734	0.533532	-0.396727
IRF6	0.0737554	0.533532	0.722566
DDX3X	0.0738431	0.533532	-0.358559
TCEA1	0.0738691	0.533532	-0.326887
KIAA0556	0.073877	0.533532	0.44195
TBX5	0.0739188	0.533532	0.377452
TFPT	0.0739658	0.533532	-0.539979
CPT1A	0.0740007	0.533532	0.295081
CAMTA2	0.0740218	0.533532	0.461569
PBXIP1	0.0740589	0.533532	0.448117
KANK2	0.0742183	0.534395	-0.240717
RASA3	0.0742744	0.534515	0.287723
C2orf68	0.0743365	0.534677	-0.501932
ITPA	0.074413	0.534684	-0.840269
FBXO11	0.0744166	0.534684	-0.322693
PIGC	0.0745045	0.535031	-0.358187
CTNNA1	0.0746411	0.535727	0.219679
FBXO5	0.0747566	0.536156	0.368114
MRPS35	0.0747802	0.536156	-0.393515
DIAPH2-AS1	0.0748714	0.536259	0.32094
PPP5C	0.0748738	0.536259	-0.363242
RPRD2	0.0749576	0.536574	-0.576191
RIMS2	0.0750871	0.537201	-0.324528
COL5A1	0.0751247	0.537201	0.269459
MYLK	0.0752498	0.537811	0.710636
MYH14	0.0752908	0.53782	0.215761
NQO2	0.0753701	0.537935	0.502936
OBP2A	0.0753865	0.537935	-0.565056
2006-03-01	0.075451	0.538111	0.220813
TBX1	0.0755068	0.538129	0.227252
DCTN4	0.0755332	0.538129	-0.375267
EFNA5	0.0756085	0.538382	-0.353934
NSL1	0.0758137	0.538553	-0.335471
UBE3C	0.075818	0.538553	-0.406416
PLEKHO1	0.0758996	0.538553	-0.42803
STAT6	0.0759325	0.538553	0.341675
C14orf166	0.0759566	0.538553	-0.570728
LOC101930052 /// LOC102724562 /// MST1 /// MST1L /// MST1P2	0.0759788	0.538553	0.435114
ARL4C	0.0762486	0.538553	-0.347795
TBC1D15	0.0762812	0.538553	-0.510352
NDEL1	0.0763118	0.538553	-0.384006
BIN3-IT1	0.0763449	0.538553	-0.35549
INPP4A	0.0763481	0.538553	-0.373544
NR4A1	0.076411	0.538553	0.283214
FAM46C	0.0764181	0.538553	-0.400037
CPE	0.0764193	0.538553	-0.269968
SPINK5	0.0764675	0.538553	-0.355871
PLIN2	0.0764853	0.538553	0.453896
C12orf43	0.0764859	0.538553	0.43878
PEX10	0.0765502	0.538553	0.373182
LRMP	0.076581	0.538553	-0.606979
NCBP2	0.0765987	0.538553	-0.379971
PRKRIR	0.0766326	0.538553	-0.396097
RNF216	0.0766495	0.538553	-0.253016
GJA5	0.0767081	0.538553	-0.338583
NARS2	0.0767262	0.538553	0.379054
RP6-149D17.1	0.0767294	0.538553	0.321271
CBS	0.0767372	0.538553	0.419757
ELK3	0.0767725	0.538553	-0.300721
ZNF821	0.0767851	0.538553	-0.446625
ALDH5A1	0.0768174	0.538553	-0.326716
PSMA3	0.0769268	0.538553	-0.895097
PLTP	0.077002	0.538553	0.401563
CLEC1B	0.0770142	0.538553	0.624807
POLDIP2	0.0770385	0.538553	0.346373
APOLD1 /// DDX47	0.0771573	0.538553	-0.292908
WWOX	0.0771862	0.538553	-0.252028
CFD	0.0772376	0.538553	-0.956465
CXorf40B	0.0774223	0.538553	-0.380652
CPD	0.0775646	0.538553	0.254566
FKBP1B	0.0775679	0.538553	-0.551879
PHF7	0.0775681	0.538553	-0.267957
HOXC13	0.077691	0.538553	0.729808
MUC3A /// MUC3B	0.077695	0.538553	0.485021
H3F3A	0.0777049	0.538553	0.814932
HMGB3P30 /// HMGB3P30	0.0777442	0.538553	0.329695
LTBP4	0.0777698	0.538553	0.365639
PAX5	0.0778257	0.538553	0.222584
LZTFL1	0.0778302	0.538553	-0.2866
VILL	0.0778399	0.538553	-0.427974
CYP2E1	0.0778413	0.538553	0.244928
RGS7	0.0778524	0.538553	0.292302
SPPL2B	0.0778951	0.538553	0.257009
ZMYM5	0.077904	0.538553	0.279185
TMEM33	0.0779102	0.538553	-0.337278
DNAJA1P4 /// DNAJA1P4	0.0779156	0.538553	0.437956
LPAL2	0.0779342	0.538553	-0.27784
KRT75	0.0779518	0.538553	0.874543
POLR2G	0.0779654	0.538553	0.320495
GSPT2	0.0779705	0.538553	-0.501354
CCDC6	0.0780007	0.538553	0.204216
RBM19	0.0780626	0.538553	0.384498
ETFB	0.07807	0.538553	-0.511329
NEDD4	0.0781284	0.538553	0.331998
SULT1E1	0.078143	0.538553	0.36832
MYL5	0.0782454	0.538861	-0.458515
TARDBPP1 /// TARDBPP1	0.0782675	0.538861	0.407491
GIGYF2	0.0784166	0.539126	0.354639
MED13L	0.078492	0.539126	-0.315201
NUP214	0.078515	0.539126	0.31282
QRICH1	0.0786029	0.539126	-0.4064
CAMTA1	0.0786363	0.539126	0.412894
MAGEA8	0.0787685	0.539126	0.361611
SMCO4	0.0787911	0.539126	-0.346783
BEAN1	0.0788157	0.539126	-0.32481
FGF6	0.0788169	0.539126	-0.467782
BCAS4	0.0788233	0.539126	0.42202
AGAP2	0.0788537	0.539126	-0.255687
MIS18A	0.0788854	0.539126	-0.321457
ADAMDEC1	0.0789306	0.539126	0.37665
GSPT1	0.0790289	0.539126	-0.585066
PGRMC1	0.0790644	0.539126	-0.384736
GZMK	0.0790681	0.539126	0.540144
PRPF19	0.0790731	0.539126	0.647967
BCORL1	0.0791518	0.539126	-0.445791
TCTN3	0.0791795	0.539126	0.246284
HMGN2P9 /// HMGN2P9	0.0792251	0.539126	-0.470396
BAZ1A	0.0792344	0.539126	-0.426345
RABGGTB /// SNORD45A /// SNORD45B /// SNORD45C	0.0792541	0.539126	-0.400087
DKFZP586I1420	0.0792563	0.539126	-0.385079
DGKZ	0.0793039	0.539126	-0.361641
RDX	0.0793525	0.539126	0.234864
GLUL	0.0793598	0.539126	-0.364908
ARIH2	0.0794301	0.539126	-0.202248
ADRA2B	0.0794719	0.539126	0.281066
HBP1	0.0794881	0.539126	-0.509409
HNRNPA2B1	0.0795026	0.539126	0.349484
WT1-AS	0.0795785	0.53937	-0.559013
NADSYN1	0.079683	0.539697	-0.334769
RP4-710M16.1	0.0797067	0.539697	-0.362352
CNTNAP3P2	0.0798843	0.540629	0.418138
RUSC1	0.0800055	0.540918	0.660226
CNDP2	0.0800288	0.540918	-0.500752
[truncated: 11,516 more rows]

## Sheet: SA-UM
Gene	Pvalue	FDR	logFC
BST2	5e-05	0.67627	-1.2355
MXD3	0.00039351	0.999868	0.781595
ETNK2	0.000480521	0.999868	-0.660009
CFHR2	0.000731321	0.999868	-0.632529
FAM49B	0.000760548	0.999868	-0.915915
CREB5 /// LOC401317	0.000779163	0.999868	1.07779
PTGS2	0.000932543	0.999868	-1.42364
RHPN1-AS1	0.00128479	0.999868	-0.700083
PPP1R13B	0.00143296	0.999868	-0.745295
ELL2	0.00146751	0.999868	0.771388
ZNF273	0.00167584	0.999868	0.642703
PPP2R3A	0.0017837	0.999868	-0.738632
TMED9	0.00187096	0.999868	-0.705402
SNIP1	0.00201491	0.999868	-0.569437
BEAN1	0.00208074	0.999868	-0.841683
COL4A3BP	0.00209404	0.999868	1.62255
UEVLD	0.00242421	0.999868	0.594824
ITGA10	0.00242936	0.999868	-0.652525
RUSC2	0.00243743	0.999868	0.796989
RPA2	0.00247835	0.999868	-0.629829
TCF4	0.00258429	0.999868	0.595595
TM7SF3	0.00265832	0.999868	0.844264
IGF2BP2	0.00279287	0.999868	1.38343
CYP17A1	0.00289187	0.999868	-0.963949
CEP350	0.00300959	0.999868	0.691096
OXR1	0.00302979	0.999868	0.792612
VAPA	0.00307495	0.999868	0.93683
CTIF	0.00312777	0.999868	1.04815
ANKRD10-IT1	0.00327723	0.999868	-1.02499
EGR1	0.00328577	0.999868	-1.18798
CNN1	0.00332969	0.999868	0.684381
MAD2L1BP	0.00342654	0.999868	-0.683584
WNK1	0.00360329	0.999868	0.676876
OCA2	0.00373272	0.999868	-0.980615
REV3L	0.00379108	0.999868	1.21865
PID1	0.00381698	0.999868	0.582929
ATP2B1	0.00395248	0.999868	0.683114
IL17RB	0.0039544	0.999868	-0.953709
TNFSF14	0.00424458	0.999868	-1.09774
SRGAP2 /// SRGAP2B /// SRGAP2C	0.00424535	0.999868	0.93117
RBMY1A1 /// RBMY1B /// RBMY1D /// RBMY1E /// RBMY1F /// RBMY1J	0.00425215	0.999868	0.875905
CEACAM8	0.00430636	0.999868	1.80689
C1orf21	0.00437791	0.999868	-0.781305
GNL2	0.00445504	0.999868	0.64591
GPX5	0.00453327	0.999868	-0.486261
RANBP2	0.00474574	0.999868	0.70913
CYP2A13	0.00479163	0.999868	-0.996334
PABPC1 /// RLIM	0.00482896	0.999868	0.678581
YRDC	0.00484369	0.999868	-0.809282
GPR22	0.00490355	0.999868	-0.469128
HIST1H1D	0.00507238	0.999868	0.635986
POM121 /// POM121C	0.00507395	0.999868	0.803459
SPA17	0.00508129	0.999868	-0.590478
ICAM1	0.00508288	0.999868	-0.767846
G0S2	0.0050964	0.999868	-1.52092
SIX6	0.00514084	0.999868	-0.614644
TMC7	0.00522727	0.999868	0.938622
RPS9	0.00534005	0.999868	-0.952997
TAF1B	0.00534965	0.999868	0.693807
CRELD1	0.00535133	0.999868	-0.708888
FAM106A	0.0055246	0.999868	-0.646438
ACTA2	0.00574834	0.999868	-0.532145
C3AR1	0.00586353	0.999868	1.38809
IDO1	0.00600122	0.999868	-1.38699
CD302 /// LY75 /// LY75-CD302	0.00603384	0.999868	0.882511
PRDM1	0.00604477	0.999868	1.04721
KIR2DS2	0.00619721	0.999868	1.46301
GAPVD1	0.00643553	0.999868	1.02122
APEX1	0.00647606	0.999868	-0.590221
OR2H1	0.00662816	0.999868	-0.905232
FOS	0.00691445	0.999868	-1.89594
EPRS	0.00701702	0.999868	0.498165
NEDD4	0.00710973	0.999868	0.718713
TARP /// TRGC2 /// TRGV9	0.0072779	0.999868	0.958373
KIR2DS5	0.00738182	0.999868	1.17481
BMPR2	0.00740758	0.999868	0.64412
MFHAS1	0.0074078	0.999868	0.767445
TMEM104	0.00757653	0.999868	0.764192
FRRS1L	0.00757806	0.999868	0.528937
ZRSR2	0.00758813	0.999868	-0.590572
TAF4B	0.00761829	0.999868	-0.432887
SECISBP2L	0.00775101	0.999868	0.634702
MAP1LC3B	0.00790627	0.999868	0.870402
BANF1	0.00802163	0.999868	-0.677711
RNF216	0.00803244	0.999868	-0.534181
MAOA	0.00804653	0.999868	0.593752
RPL18	0.00806016	0.999868	-0.559509
DNAJB6	0.00807638	0.999868	1.0703
EIF5A2	0.00835639	0.999868	-0.701125
MOXD1	0.00838465	0.999868	-0.507953
KDR	0.00852817	0.999868	0.626405
RCAN3	0.00853676	0.999868	0.497258
TMEM177	0.00859317	0.999868	-0.598731
TAS2R7	0.00880043	0.999868	-0.70915
GAGE1	0.00882117	0.999868	-1.2286
CLTC	0.00886462	0.999868	0.645635
GAS2L1	0.00890528	0.999868	0.54358
BEST1	0.00897076	0.999868	-0.758144
FKBPL	0.00902768	0.999868	0.501691
TRAF4	0.00906629	0.999868	0.805209
PABPC1	0.00910713	0.999868	0.58756
SAMD14	0.00928415	0.999868	0.665744
HYAL3	0.00935711	0.999868	0.852643
MANSC1	0.00940983	0.999868	0.813004
FAR2	0.00948571	0.999868	1.10796
FAS	0.00955391	0.999868	-0.742834
TJP1	0.00960397	0.999868	0.630385
CRELD2	0.00970189	0.999868	-0.675623
THOP1	0.00998823	0.999868	-0.861059
KIR3DL1 /// KIR3DL2	0.0100455	0.999868	0.758118
PHACTR2	0.0101378	0.999868	0.572718
DPEP1	0.0101889	0.999868	-0.797308
SNRPN /// SNURF	0.0103181	0.999868	-0.64981
FOXC1	0.0103985	0.999868	1.34152
AP2B1	0.0104479	0.999868	0.772525
RP1-8B22.1	0.0105727	0.999868	-0.722427
COLQ	0.0106275	0.999868	0.668151
GSDMB	0.0107574	0.999868	-0.693029
NBEAL2	0.0108109	0.999868	-0.869899
PLXNA1	0.0108348	0.999868	0.571368
CLDN8	0.0108731	0.999868	-0.491676
NCAPD2	0.0108748	0.999868	0.990405
NEU2	0.0109377	0.999868	0.718441
RPL23AP22 /// RPL23AP22	0.0109402	0.999868	0.8436
CD93	0.0110921	0.999868	0.566475
MYH7	0.0111602	0.999868	0.604616
PGM5	0.01119	0.999868	0.528203
ATF3	0.0112025	0.999868	-0.769992
KIAA1324	0.011473	0.999868	-0.596254
TP53TG3 /// TP53TG3B /// TP53TG3C /// TP53TG3D	0.0116913	0.999868	-0.559146
USP24	0.0117461	0.999868	0.506643
DNASE1L3	0.0118567	0.999868	-0.511022
PRRG2	0.0118734	0.999868	-0.908406
HIST1H4G	0.0119182	0.999868	-0.481761
AGO3	0.0119335	0.999868	0.486588
ZMIZ1	0.0119428	0.999868	0.529184
HCRTR2	0.0119624	0.999868	-0.817412
RAB6B	0.0120231	0.999868	0.537872
SIAH2	0.0120924	0.999868	0.902439
SLC29A3	0.0122344	0.999868	1.56521
ADAM19	0.0126184	0.999868	-0.449247
CD163	0.01271	0.999868	1.02494
LOC145678	0.0128	0.999868	-0.620005
FAM50A	0.012852	0.999868	-0.455871
LAPTM4B	0.0128778	0.999868	0.761605
BMP2	0.0129085	0.999868	0.582368
PRB3	0.0129223	0.999868	0.554487
C2orf44	0.0131615	0.999868	0.894328
GOT1	0.0134957	0.999868	0.72217
RHBDF2	0.0135159	0.999868	-0.499423
CXCL1	0.0135547	0.999868	-0.64297
GUSB	0.0136558	0.999868	-0.455831
ARFIP2	0.0136703	0.999868	-1.03409
TRAK2	0.0136781	0.999868	0.953104
TNIP3	0.0137215	0.999868	0.795161
SERINC3	0.013772	0.999868	0.77604
COQ3	0.013772	0.999868	1.07661
OSBPL8	0.013886	0.999868	0.502504
EGR2	0.0139212	0.999868	-0.972702
SPOCK1	0.0139657	0.999868	-0.999981
SNN	0.0139678	0.999868	-0.517425
SPEN	0.0140054	0.999868	0.514121
FOXN3-AS2	0.0140589	0.999868	-0.717905
MIR1244-3	0.014326	0.999868	1.17322
TCN1	0.0143822	0.999868	0.929854
RALBP1	0.0144232	0.999868	0.825592
SON	0.014443	0.999868	0.693557
SNAI1	0.0144862	0.999868	0.925609
IFI35	0.0146806	0.999868	-1.29626
IL1R2	0.0149396	0.999868	1.42028
CPNE3	0.0149432	0.999868	0.622224
CTBP1	0.0149674	0.999868	-0.615658
CEBPA	0.0149744	0.999868	-0.647613
ZNF204P	0.0149922	0.999868	0.676675
DUSP9	0.0151334	0.999868	-0.50598
NABP1	0.0151342	0.999868	0.530364
CTSG	0.0151464	0.999868	1.64205
ATP7A	0.0151783	0.999868	0.672132
MCM6	0.0153266	0.999868	0.717885
TFF1	0.0153376	0.999868	0.772672
PHC1	0.0153965	0.999868	-0.961975
MAT2B	0.0154048	0.999868	0.548042
ATP13A3	0.0154243	0.999868	0.619405
SLC12A7	0.0154517	0.999868	-0.864797
AKAP13	0.0155427	0.999868	0.66645
APOBEC3F /// APOBEC3G	0.0155898	0.999868	-0.900438
RPL27AP /// RPL27AP	0.0156188	0.999868	0.689299
LRCH1	0.0158632	0.999868	0.883359
HIST1H1T	0.0159093	0.999868	0.780536
ING1	0.0159443	0.999868	-0.451641
SAA1 /// SAA2	0.016179	0.999868	-0.633674
HNRNPUL1	0.0162694	0.999868	0.618612
SLC5A7	0.0163759	0.999868	-0.612714
SNF8	0.0164411	0.999868	-0.453956
KANK1	0.0164576	0.999868	-0.592889
MST1R	0.0165315	0.999868	-1.33648
ADCK2	0.0165337	0.999868	0.422186
ARG1	0.0166061	0.999868	1.17262
TLN2	0.0166297	0.999868	-0.757275
TSGA10	0.0166519	0.999868	-0.773614
P2RY1	0.0166966	0.999868	0.5372
THOC6	0.0168851	0.999868	-0.586981
VCX2	0.0169161	0.999868	-0.524516
NANS	0.0170426	0.999868	-0.642788
LYPD3	0.0171761	0.999868	0.844778
NR2C2	0.0171784	0.999868	0.516616
OGFR	0.0172557	0.999868	-0.520878
MYH6	0.017329	0.999868	-0.809746
BCL2L2-PABPN1 /// PABPN1	0.0174838	0.999868	-0.599439
B9D1	0.0175024	0.999868	-0.38403
ITIH5	0.017542	0.999868	-0.792015
ELP5	0.0175682	0.999868	-0.777474
PPP2R2B	0.0177054	0.999868	0.433094
SFT2D3 /// WDR33	0.0177869	0.999868	0.665716
HP /// HPR	0.0178239	0.999868	0.928792
NR1D2	0.0179021	0.999868	0.656417
DHCR7	0.0179172	0.999868	0.613389
RBL2	0.0180115	0.999868	0.877834
SMG5	0.018097	0.999868	0.476951
KAT5	0.0183595	0.999868	-0.541143
PLSCR3 /// TMEM256-PLSCR3	0.0184504	0.999868	0.607658
FBXO24	0.0186084	0.999868	-0.815002
ZMYM4	0.0186246	0.999868	0.450997
MGAT4B	0.0186541	0.999868	0.620393
KIR2DS4	0.0186543	0.999868	0.486718
IRF7	0.018681	0.999868	-1.11897
ADSS	0.0187835	0.999868	-0.564434
PSMB10	0.0191014	0.999868	-0.733495
LOC101929777 /// WNT3	0.0192285	0.999868	0.585204
TPD52L2	0.0192671	0.999868	-0.802089
SLC22A7	0.0192802	0.999868	-0.420109
LTF	0.0192821	0.999868	1.96974
KIR2DL5A	0.0194498	0.999868	1.1159
INTS6	0.0194612	0.999868	0.51226
LOC100134822 /// LOC100288069 /// LOC100996442 /// LOC101927270 /// LOC101928344 /// LOC101928670 /// LOC101929540 /// LOC102724409	0.0195578	0.999868	0.528121
UXT	0.0196225	0.999868	-0.601722
METTL9	0.0197989	0.999868	1.02132
C17orf53	0.0198928	0.999868	0.699567
EIF4EBP2	0.0199448	0.999868	0.581344
LRRN3	0.0199846	0.999868	-0.427326
TTLL4	0.0199986	0.999868	0.483449
GPR162	0.020249	0.999868	0.689132
BIN1	0.0202601	0.999868	-0.422065
PTP4A2	0.0202892	0.999868	0.473183
CMKLR1	0.0202951	0.999868	0.548779
RNF186	0.0203741	0.999868	-0.73932
GLULP4 /// GLULP4	0.0204103	0.999868	0.596155
MPHOSPH10	0.0204259	0.999868	1.05165
ATP2B2	0.0205382	0.999868	-0.414719
CCDC68	0.020544	0.999868	-0.68924
CNTF	0.0205535	0.999868	-0.751417
TTC3 /// TTC3P1	0.0205797	0.999868	0.45059
TNFSF12-TNFSF13 /// TNFSF13	0.0205994	0.999868	-0.584091
SST	0.0206396	0.999868	-0.622968
CYTH4	0.0206564	0.999868	-0.547901
TSPYL4	0.0207008	0.999868	0.442673
ACE	0.0207673	0.999868	-0.535095
S100A2	0.0208971	0.999868	-0.474988
PDP1	0.0211049	0.999868	0.757001
FUT8	0.0212675	0.999868	0.804686
GADD45A	0.0212912	0.999868	1.21159
RP1-6P5.2	0.0214192	0.999868	0.666865
ALAD	0.0214295	0.999868	0.576535
BIK	0.0214594	0.999868	-0.886508
PMS2P5 /// PMS2P9	0.0216115	0.999868	-0.443784
DDR2	0.0216374	0.999868	-0.681694
HOXC4	0.0216784	0.999868	-0.836399
PA2G4	0.0217334	0.999868	0.560698
GLS2	0.0217594	0.999868	0.556423
BRD4	0.0217738	0.999868	0.631076
SOCS3	0.0217871	0.999868	-0.459253
ADAM17	0.0220285	0.999868	0.366807
CLCN1	0.0222143	0.999868	0.779845
AIRE	0.0224259	0.999868	0.540257
TRIM15	0.0225288	0.999868	0.318187
ZNF710	0.0225977	0.999868	0.65859
RBM38	0.0225994	0.999868	0.71258
UBE2O	0.022638	0.999868	1.69084
PIGK	0.0226543	0.999868	-0.723207
CKAP4	0.0226761	0.999868	0.647101
COPS7A	0.0230122	0.999868	-0.490424
HPGD	0.0230237	0.999868	0.587999
ZFP36L1	0.0230751	0.999868	0.498172
CPT1A	0.0230841	0.999868	0.510396
HSBP1	0.0231431	0.999868	-0.441582
AK5	0.0231743	0.999868	-0.876984
SPINK2	0.0231833	0.999868	-0.738064
ANKRD55	0.0231955	0.999868	0.704747
OLAH	0.0232468	0.999868	0.460974
TCRA /// TRAV21 /// TRAV21 /// YME1L1	0.023348	0.999868	-0.596819
CHRNA6	0.0234512	0.999868	-0.612747
POU3F3	0.0234821	0.999868	0.581945
PWWP2A	0.0235091	0.999868	-0.603334
STK39	0.0235751	0.999868	0.684042
IFIT3	0.0236035	0.999868	-1.69119
BPI /// LOC149684	0.0237568	0.999868	1.497
RNF111	0.0238633	0.999868	0.522941
VILL	0.0238964	0.999868	-0.745932
CHD1	0.0239893	0.999868	0.539802
MS4A3	0.0240064	0.999868	1.2801
C2orf54	0.0240421	0.999868	-0.552083
WRB	0.0241105	0.999868	0.88214
RSBN1	0.0241891	0.999868	0.687272
ZNF184	0.0242241	0.999868	0.502165
C1QB	0.0244191	0.999868	0.900171
PABPC3	0.0244596	0.999868	1.04729
NTRK1	0.0245567	0.999868	-0.386504
KCTD12	0.0245982	0.999868	0.637406
LINC00965	0.0247437	0.999868	0.682153
CA2	0.0247824	0.999868	1.4853
DEFA6	0.0247902	0.999868	0.367728
TFR2	0.0248678	0.999868	0.476026
PTPRB	0.0249161	0.999868	-0.431437
ALKBH4	0.0249206	0.999868	-0.972341
TRAC	0.0249243	0.999868	-0.833532
LOC101928747 /// RBMX /// SNORD61	0.0249306	0.999868	0.668238
HINFP	0.0250292	0.999868	0.844784
GRHPR	0.0250639	0.999868	-0.397929
MYL4	0.0250958	0.999868	-0.783351
PTBP3	0.0251247	0.999868	0.515952
STOM	0.0253699	0.999868	0.708438
TRMT11	0.0253933	0.999868	0.553741
S100A12	0.0254193	0.999868	0.688157
MT4	0.0255606	0.999868	-1.07687
OR2A20P /// OR2A9P	0.0256148	0.999868	-0.734494
ITGAX	0.0259306	0.999868	0.734367
SEC61A2	0.0261127	0.999868	-0.754097
SEC22B	0.0261393	0.999868	0.780644
PLTP	0.0261683	0.999868	0.684854
C15orf49	0.0263792	0.999868	-0.85754
PIGN	0.0264059	0.999868	0.524772
ATG3	0.0265106	0.999868	-0.521193
RAPGEF2	0.0265827	0.999868	0.556079
PTGIR	0.0267118	0.999868	-0.722383
ATXN1	0.0268026	0.999868	0.596822
FNDC3B /// LOC101928615	0.0268224	0.999868	1.09166
TINF2	0.0270322	0.999868	-0.656087
HIST1H2AJ	0.0270493	0.999868	1.15174
EIF1AY	0.0271217	0.999868	1.27293
H2AFX	0.0271271	0.999868	0.296004
TYROBP	0.0271329	0.999868	-0.853138
CYR61	0.0271998	0.999868	-0.532776
ORMDL2	0.027305	0.999868	-0.455085
HLA-DPA1	0.0274338	0.999868	-0.612078
SLC1A4	0.027489	0.999868	0.562925
FMO1	0.0274933	0.999868	-0.558168
SAG	0.0275187	0.999868	0.657065
KRT24	0.0276236	0.999868	0.54726
CLASRP	0.0276867	0.999868	-0.925423
LRRC3	0.0279253	0.999868	-0.485441
REG1B	0.0279396	0.999868	-0.533923
2008-09-01	0.0280695	0.999868	0.340672
AGPAT3	0.0282004	0.999868	-0.830639
HIST1H2AG /// HIST1H2AH /// HIST1H2AI /// HIST1H2AK /// HIST1H2AL /// HIST1H2AM	0.0282329	0.999868	0.659498
SLC2A10	0.0282645	0.999868	-0.603303
ZNF562	0.0283075	0.999868	-0.466936
CERK	0.0283528	0.999868	-0.697561
STARD5	0.0283985	0.999868	-0.484637
CD247	0.0284749	0.999868	-0.862933
SPRR2C	0.028478	0.999868	0.401884
CRADD	0.0285124	0.999868	-0.464897
CDC42EP2	0.0289247	0.999868	0.467241
ATP5J2-PTCD1 /// PTCD1	0.029	0.999868	0.57837
DROSHA	0.0293222	0.999868	0.534822
DPM2	0.0293473	0.999868	-0.629784
ALOX12	0.029379	0.999868	0.663445
RAD23B	0.029387	0.999868	0.374832
GNG7	0.0294642	0.999868	-0.56426
MARCKS	0.0295868	0.999868	0.614934
POM121	0.029678	0.999868	-0.423186
TULP4	0.0297659	0.999868	0.507395
LYRM2	0.029871	0.999868	0.568174
RANBP10	0.0298808	0.999868	0.65178
ACVR2B-AS1	0.0299269	0.999868	0.991854
PIK3R1	0.0299669	0.999868	0.605092
CEP250	0.0300132	0.999868	0.445022
FXYD2 /// FXYD6-FXYD2	0.0300912	0.999868	-0.487624
ZC2HC1C	0.030136	0.999868	0.512693
M6PR /// PHC1	0.0301767	0.999868	-0.495704
TIMM22	0.0302388	0.999868	-1.11098
PUM1	0.0303358	0.999868	0.454834
GUCY2D	0.0304732	0.999868	-0.796556
TRAPPC12	0.0307069	0.999868	1.00501
VCAN	0.0307109	0.999868	0.540549
ASCC2	0.0307313	0.999868	0.797437
TAS2R1	0.0307884	0.999868	0.616658
MED23	0.0308008	0.999868	0.516899
MBNL2	0.0308533	0.999868	0.494716
BCAS4	0.0308559	0.999868	-0.69986
HSPA2	0.0310477	0.999868	0.726592
PLOD2	0.0310943	0.999868	0.425171
PLBD1	0.0311043	0.999868	0.679102
ATF6	0.0311456	0.999868	0.915964
RAB3GAP2	0.031197	0.999868	-0.474144
KRAS	0.0312957	0.999868	0.390419
MSH5-SAPCD1 /// SAPCD1	0.0315247	0.999868	-0.467156
TACC3	0.0315511	0.999868	-0.840486
CD1D	0.0316254	0.999868	-0.533102
LIMK2	0.031679	0.999868	-0.508279
GM2A	0.031821	0.999868	0.429028
DDX19A /// DDX19B	0.0318932	0.999868	0.541749
TMPRSS11E	0.0319045	0.999868	-0.667393
TMEM262	0.0319672	0.999868	0.376623
SLC48A1	0.032031	0.999868	0.47664
SPIN1	0.0320892	0.999868	0.811567
WNT7B	0.0321605	0.999868	0.543148
PPM1G	0.032192	0.999868	-0.637654
FOSB	0.0323013	0.999868	-0.988061
SPN	0.0323676	0.999868	-0.681748
PRO2964	0.0324191	0.999868	-0.579961
ADCY1	0.0324408	0.999868	-0.489358
RBP1	0.032443	0.999868	-0.742405
TFE3	0.0325776	0.999868	0.591801
CREB1	0.0326269	0.999868	0.393281
DICER1	0.0326868	0.999868	0.534317
NIPBL	0.0327674	0.999868	0.508621
CDK8	0.032866	0.999868	0.499174
KHK	0.032907	0.999868	-0.378896
MARS /// MIR6758	0.0329663	0.999868	-0.388531
CEP72	0.0329833	0.999868	0.898059
ZNF180	0.0331367	0.999868	0.665602
PDZD2	0.0331532	0.999868	0.414039
GPX3	0.0333568	0.999868	0.812971
CEP170 /// CEP170P1	0.0334002	0.999868	0.548387
VENTX	0.0335481	0.999868	-0.727437
TPTE	0.0336048	0.999868	-0.470436
LMBR1L	0.0336792	0.999868	-0.755752
EFTUD1	0.0336961	0.999868	0.426821
IKZF3	0.0336983	0.999868	0.635345
XKRY /// XKRY2	0.0337891	0.999868	0.464743
MAPK4	0.0338018	0.999868	-0.492157
CALML3	0.0339521	0.999868	0.666184
FOXH1	0.0341051	0.999868	0.751735
SLC4A1	0.0342533	0.999868	1.08534
SPDEF	0.034278	0.999868	0.414513
ZNF365	0.0342926	0.999868	0.480946
AC004692.5	0.0343009	0.999868	-0.430926
SLC25A37	0.0343818	0.999868	-0.716114
PLCB3	0.0344821	0.999868	-0.689057
WNT5B	0.034522	0.999868	-0.321287
GREM1	0.0345702	0.999868	-0.460596
PGAM1	0.0345906	0.999868	0.527549
EDN1	0.0347676	0.999868	0.706594
STX16	0.0348056	0.999868	-0.37707
GBAP1 /// LOC100510710	0.0348878	0.999868	-0.859195
FZD9	0.0349775	0.999868	-0.512276
FAM186A	0.0350276	0.999868	-0.502879
PTPRN2	0.0350536	0.999868	0.35516
CD207	0.0351016	0.999868	-0.615446
GCKR	0.0351064	0.999868	-0.625096
TOB2	0.0351073	0.999868	0.677755
PLD3	0.0351254	0.999868	-0.670284
F2R	0.0352233	0.999868	0.510948
HLA-DRB1 /// HLA-DRB1	0.0352243	0.999868	-0.488762
GYG1	0.0353669	0.999868	0.851584
SPATA6L	0.0355202	0.999868	0.606977
BTBD2	0.0355561	0.999868	0.812998
ADCY6	0.0357299	0.999868	-0.997889
MCM4	0.0357428	0.999868	0.388455
BST1	0.0360112	0.999868	-0.441508
LAMA1	0.0360616	0.999868	-0.737121
CERS4	0.036064	0.999868	0.634248
LOC101928274 /// VSIG10	0.0360843	0.999868	0.484835
UGCG	0.0360902	0.999868	0.769451
GPR17	0.0360925	0.999868	-0.353393
TMPO	0.0361007	0.999868	0.446571
DEFA1 /// DEFA1B /// DEFA3	0.0361171	0.999868	2.03231
TGFB1I1	0.0361636	0.999868	0.674861
AP1B1	0.0361731	0.999868	0.709966
VGLL4	0.0362745	0.999868	0.533798
TAB1	0.0366094	0.999868	-0.703027
MED13	0.0366622	0.999868	0.553436
RPS12	0.0367428	0.999868	-0.370424
JAM2	0.0370232	0.999868	-0.931291
PLA2G6	0.0370898	0.999868	-0.465317
ANP32C	0.0371265	0.999868	0.384823
ASCL1	0.0371643	0.999868	0.48729
OBP2A	0.0372438	0.999868	-0.887216
EIF4G3	0.0372871	0.999868	0.49435
NRIP1	0.037412	0.999868	0.698599
PDIA2	0.0374231	0.999868	-0.36197
TM6SF2	0.0376748	0.999868	0.671886
SF3B4	0.0377091	0.999868	0.437374
HAUS7 /// TREX2	0.0380665	0.999868	-0.382295
KCNE1L	0.0381188	0.999868	-0.400426
LRCH4 /// SAP25	0.0382101	0.999868	-0.507253
P2RY14	0.0382438	0.999868	-1.02407
N4BP2L2 /// U50535	0.0383947	0.999868	-0.942958
RAP1GAP	0.0384366	0.999868	0.754242
PAQR4	0.0386145	0.999868	1.12719
ARSE	0.0386177	0.999868	-0.487414
SYCE1L	0.038713	0.999868	-0.533899
ASMT	0.0387328	0.999868	-0.372282
ACADS	0.0387634	0.999868	-0.548775
AP5M1	0.0390006	0.999868	0.696949
AGAP2	0.0391086	0.999868	-0.402212
RPL39L	0.0391119	0.999868	-0.631508
HMGA2	0.0392273	0.999868	-0.547283
FICD	0.0394368	0.999868	-0.501218
ASB13	0.0394451	0.999868	-1.05272
LILRA4	0.0395895	0.999868	0.752909
HBE1	0.0396344	0.999868	-0.75477
MFAP5	0.0397686	0.999868	-0.392822
ZNF787	0.0398856	0.999868	-0.624164
KIAA1045	0.040084	0.999868	-0.378118
XPO6	0.0401312	0.999868	-0.414165
GPR144	0.0401334	0.999868	0.483065
YWHAB	0.0401528	0.999868	0.424357
GYPB	0.0401577	0.999868	0.933465
PPP1R37	0.0403146	0.999868	0.423376
ASGR2	0.0404822	0.999868	0.586175
SUV420H1	0.0405107	0.999868	0.417685
PTPN4	0.0406417	0.999868	0.620255
SYNJ1	0.0407526	0.999868	-0.356228
TOP2A	0.0409423	0.999868	0.631226
DNAJC12	0.0410052	0.999868	0.766295
POP5	0.0410406	0.999868	-0.47869
SLPI	0.0411197	0.999868	0.592513
IGF1R	0.04119	0.999868	0.65199
RNASE3	0.041274	0.999868	1.43844
PAGE1	0.0415727	0.999868	-0.489222
LOC100127972	0.0416649	0.999868	-0.757856
SLC17A7	0.0416933	0.999868	-0.494248
NSD1	0.0417002	0.999868	0.502846
MXD1	0.0417118	0.999868	-0.999053
DNAJC11	0.0418498	0.999868	-0.715787
HDLBP	0.0419483	0.999868	0.524212
LRRC32	0.042237	0.999868	0.407143
LINC00939	0.0422451	0.999868	-0.380159
BRD8	0.0423316	0.999868	0.420422
TCAP	0.0423744	0.999868	0.567671
RAB11FIP5	0.0424354	0.999868	-0.39884
LPL	0.042454	0.999868	0.60299
ASCC1	0.0425324	0.999868	0.763331
APOL2	0.0425876	0.999868	-0.521184
PACSIN2	0.0428254	0.999868	0.787333
PTPLA	0.0429606	0.999868	0.783764
NIT2	0.0431176	0.999868	0.573336
PLK4	0.0431525	0.999868	0.492682
FAM120A	0.0432512	0.999868	0.35146
NXF2 /// NXF2B	0.0433588	0.999868	-0.482823
HDGF	0.0434505	0.999868	0.868328
MRPS2	0.0435037	0.999868	-0.497236
SIRT4	0.0436009	0.999868	-0.382572
MFSD6	0.0437227	0.999868	0.427665
TCF7	0.0437533	0.999868	-0.507566
CLIC1P1 /// CLIC1P1	0.0438409	0.999868	-0.578804
GRTP1	0.044018	0.999868	-0.537691
ERI3	0.0440313	0.999868	-0.458438
ICAM2	0.0443049	0.999868	-0.493481
RP3-334F4.2	0.0443959	0.999868	-0.305853
GINS1	0.0444023	0.999868	0.726323
ADAM3B /// ADAM3B	0.0444871	0.999868	0.356407
USP6NL /// USP6NL-IT1	0.044547	0.999868	0.465927
IFIT1	0.0446121	0.999868	-2.05278
EIF5A	0.0447067	0.999868	-0.625517
SIPA1L1	0.0447212	0.999868	0.563836
RNF13	0.0452478	0.999868	0.413744
TMEM208	0.0453041	0.999868	-0.492318
BTF3P11	0.0453201	0.999868	0.457066
OR2F1	0.0454066	0.999868	0.815092
ZBTB7B	0.045415	0.999868	0.397828
CNN2	0.045445	0.999868	-0.555454
RAB8A	0.0455315	0.999868	-0.570655
GPR25	0.0455959	0.999868	-0.334596
PIK3R5	0.0456596	0.999868	-0.498774
TXNRD3 /// TXNRD3NB	0.0456901	0.999868	0.449885
STATH	0.0457976	0.999868	-0.591412
COMMD4	0.0458271	0.999868	-0.322166
CDON	0.0458446	0.999868	1.29743
TM9SF1	0.0460047	0.999868	0.467136
RFC2	0.0460276	0.999868	-0.521691
SEC31A	0.0462299	0.999868	0.330414
PPRC1	0.0462858	0.999868	0.484579
OSBPL11	0.0463788	0.999868	0.679782
FOXN2	0.0464267	0.999868	1.59622
ENO2	0.0464623	0.999868	-0.540961
CDK10	0.0465408	0.999868	-0.36019
KL	0.0465593	0.999868	-0.432884
MPO	0.0467078	0.999868	1.02272
UBE2Z	0.0467659	0.999868	-0.540172
TMEM168	0.0469223	0.999868	0.833721
DEAF1	0.0469501	0.999868	0.63593
RAB33B	0.0469556	0.999868	-0.756562
FAM102A	0.0472274	0.999868	-0.592394
LPCAT3 /// U47924.30	0.0472676	0.999868	-0.485336
MAGOH /// MAGOHB	0.0473021	0.999868	-0.532907
MFNG	0.0473412	0.999868	-0.351146
KLHL4	0.0474718	0.999868	-0.600503
DIABLO	0.0474925	0.999868	-0.538228
PEAK1	0.0476472	0.999868	-0.535544
SYT1	0.0477077	0.999868	0.373156
SUV39H1	0.0477143	0.999868	-0.360768
ETS1	0.0477294	0.999868	-0.517253
SLIT1	0.0478276	0.999868	-0.376871
IGSF9B	0.0478464	0.999868	-0.348894
KDM4B	0.0479075	0.999868	0.492686
RALA	0.0481272	0.999868	0.567092
SGSM3	0.0481379	0.999868	-0.380311
ATP12A	0.0481686	0.999868	-0.503126
F7	0.048192	0.999868	0.421855
PPP2R5E	0.0482801	0.999868	0.615657
LIG1	0.0482833	0.999868	-0.358948
CDT1	0.0483157	0.999868	0.608966
SSR3	0.0483591	0.999868	0.450111
LGMN	0.0484126	0.999868	1.033
MOG	0.0484337	0.999868	-0.334493
PRKAR1AP /// PRKAR1AP	0.0484721	0.999868	0.707636
PCBP2	0.0484836	0.999868	0.468109
TLE6	0.0485097	0.999868	0.516406
FAN1	0.0485489	0.999868	-0.420979
PLEK	0.048651	0.999868	-0.431941
PSMB8	0.048707	0.999868	-0.737918
RABL3	0.0488255	0.999868	0.775626
SLCO4A1	0.0489024	0.999868	0.721161
CATSPERB	0.0491	0.999868	-0.50839
DCAF4	0.0491159	0.999868	-0.584801
SYNJ2BP /// SYNJ2BP-COX16	0.049133	0.999868	0.413896
PEX16	0.0491742	0.999868	-0.454913
SARAF	0.0494075	0.999868	-0.475968
ABCA11P	0.0494906	0.999868	0.614066
EPYC	0.0497688	0.999868	-0.401273
PIR	0.0498108	0.999868	-0.487017
DGKB	0.0498221	0.999868	0.41397
ARNT2	0.0498509	0.999868	-0.328855
TMED3	0.0498751	0.999868	-0.388111
GDF3	0.0499342	0.999868	0.904792
KANSL1L	0.0500631	0.999868	-0.459223
ZNF652	0.0501688	0.999868	0.534885
OR3A2	0.0502449	0.999868	-0.473076
RAMP3	0.0502633	0.999868	-0.667981
SHCBP1L	0.0504651	0.999868	0.800018
SPTAN1	0.0506244	0.999868	0.437235
HCAR3	0.0506646	0.999868	-0.912661
ABHD3	0.050824	0.999868	-0.888666
MINK1	0.0509006	0.999868	0.599118
TMEM50B	0.0509232	0.999868	-0.41411
DAB2 /// LOC101926921	0.0509261	0.999868	0.495738
CEND1	0.0510492	0.999868	0.94213
ZEB2	0.0511711	0.999868	0.53979
IL2RB	0.0512501	0.999868	0.654763
HIST1H4L	0.0512614	0.999868	-0.760274
SAP30L	0.0514206	0.999868	0.413996
LTB	0.0514207	0.999868	-0.81496
ZNF266	0.0514611	0.999868	-0.465901
DTL	0.0514888	0.999868	0.647999
HS2ST1	0.0516657	0.999868	0.366709
ZWILCH	0.0517367	0.999868	0.775237
EZH2	0.0518316	0.999868	0.709969
C1orf115	0.0523108	0.999868	-0.586473
PSMB9	0.0523173	0.999868	-0.609034
LINC00216	0.0523316	0.999868	-0.683479
ZNF536	0.0523943	0.999868	0.51442
HPSE	0.0525443	0.999868	0.630241
AHCYL2	0.0525849	0.999868	0.624847
MRPS28	0.0526269	0.999868	-0.662108
PSPN	0.0527641	0.999868	0.442374
NUDCD3	0.0528285	0.999868	-0.370518
COL1A1	0.0529049	0.999868	-0.356646
TES	0.0530091	0.999868	0.426764
G6PC	0.0530787	0.999868	0.40566
IL18R1	0.0533713	0.999868	0.653747
ZBTB38	0.05345	0.999868	0.612165
COQ7	0.0535398	0.999868	-0.479819
VPS35	0.0535524	0.999868	0.374714
TCN2	0.0535752	0.999868	-0.738361
LOC100506248 /// LOC728026 /// MIR1244-1 /// MIR1244-2 /// MIR1244-3 /// PTMA	0.0536494	0.999868	-1.21723
RGS17	0.0538025	0.999868	-0.477563
DMC1	0.0538692	0.999868	-0.335607
GP9	0.0539342	0.999868	0.97196
DUSP21	0.0539848	0.999868	-0.47517
HIST1H2BD	0.0541311	0.999868	0.670227
TSHB	0.054132	0.999868	-0.416195
OXCT2	0.0541656	0.999868	0.559598
FUT1	0.0542536	0.999868	-0.458392
NDUFC1	0.0542714	0.999868	1.16597
TRAPPC8	0.0542853	0.999868	0.519494
UBQLN2	0.0543514	0.999868	0.541199
MMP9	0.0543751	0.999868	1.31222
BLOC1S1	0.0544678	0.999868	-0.552865
PPIG	0.0546364	0.999868	0.370712
FPGS	0.0547868	0.999868	-0.46784
ADAM3A	0.0549839	0.999868	-0.431211
RAD54L	0.0550323	0.999868	0.672992
CEBPE	0.0552658	0.999868	0.829105
CD55	0.055438	0.999868	0.581532
PPOX	0.0555077	0.999868	0.488484
SCGB1D1	0.055643	0.999868	-0.520858
ORC4	0.0556993	0.999868	-0.373031
PUS7	0.0558146	0.999868	-0.407417
RBM12B	0.0559498	0.999868	0.579748
LGALS4	0.0559917	0.999868	-0.433927
TSPYL1	0.0560932	0.999868	0.483316
BRCC3	0.0561138	0.999868	-0.593626
SLC26A1	0.0562336	0.999868	-0.342621
SLC12A3	0.0562483	0.999868	-0.349887
POU2F2	0.0563763	0.999868	-0.573295
CYBRD1	0.0564251	0.999868	0.836243
CXCL6	0.0564335	0.999868	-0.382696
GTF3C3	0.0565165	0.999868	0.375298
CCNB2	0.0565245	0.999868	1.0847
SRRM1	0.0565594	0.999868	0.516439
CASK	0.056681	0.999868	-0.378017
LINC00623 /// LINC00869	0.056703	0.999868	-0.916802
CHRNB1	0.0570283	0.999868	-0.866935
LEPROT	0.0570499	0.999868	-0.368971
ABCD1P2 /// ABCD1P2	0.0571816	0.999868	-0.577016
ARHGAP4	0.0572585	0.999868	-0.706076
DMRT1	0.0573086	0.999868	-0.553141
RBX1	0.0573775	0.999868	-0.805912
MAFK	0.0574126	0.999868	-0.486259
CCNG1	0.0574434	0.999868	0.459512
SDC3	0.0574537	0.999868	0.590896
ADAM23	0.057564	0.999868	-0.527344
2009-09-01	0.0577009	0.999868	0.408802
CADM1	0.0577298	0.999868	0.50425
RAD51	0.0577355	0.999868	0.482822
BTG2	0.0578832	0.999868	-0.429611
CD72	0.0580058	0.999868	-0.483276
RNF187	0.0580229	0.999868	-0.411026
CSNK1G1	0.0580694	0.999868	-0.365081
GRAMD1B	0.058129	0.999868	-0.581499
ACSBG1	0.0582343	0.999868	-0.330661
IRAK3	0.0583437	0.999868	0.554596
TRMT44	0.0584459	0.999868	-0.380901
SLC25A17	0.0584564	0.999868	-0.425601
SPINT3	0.058586	0.999868	-0.420121
C10orf88	0.0586916	0.999868	-0.498888
TCRDV2 /// TRDC /// TRDC /// YME1L1	0.0587681	0.999868	0.604023
F10	0.0587913	0.999868	0.481722
C3orf52	0.0588215	0.999868	-0.595883
DSC2	0.0588363	0.999868	0.727469
HOXB8	0.0588714	0.999868	-0.371995
KIAA1467	0.0589643	0.999868	-0.573506
PPIEL	0.0590845	0.999868	0.286573
PMS2P1	0.0594093	0.999868	-0.525257
AKAP8	0.0595031	0.999868	-0.607034
IFNA16	0.0595496	0.999868	-0.424456
FSHB	0.0599048	0.999868	-0.658841
BARD1	0.0599881	0.999868	0.7785
TFPT	0.0600026	0.999868	-0.750191
MYL9	0.0600742	0.999868	0.832382
SLC30A4	0.0603216	0.999868	-0.496186
PANK3	0.0603513	0.999868	0.373854
GCC1	0.060449	0.999868	-0.443904
VIM	0.0604943	0.999868	0.410021
TMEM131	0.061006	0.999868	0.579666
RPS2P45 /// RPS2P45	0.0611139	0.999868	-0.546525
GOLGA8N	0.0611273	0.999868	-0.780341
KDELR1	0.0612285	0.999868	0.621422
FAM118A	0.0613124	0.999868	-0.431376
FAM65A	0.0613542	0.999868	0.462024
PAAF1	0.061459	0.999868	-0.378924
GHRHR	0.0615639	0.999868	-0.386032
PDCL	0.0615772	0.999868	0.345606
MAGEA8	0.0616027	0.999868	0.508044
ARSJ	0.0616228	0.999868	-0.532505
VDAC1	0.0616356	0.999868	0.466092
CENPU	0.061665	0.999868	0.48863
PHKG2	0.0616966	0.999868	0.714487
RP1-68D18.4	0.0618017	0.999868	-0.677804
EMG1	0.0620304	0.999868	-0.491164
MAPK9	0.0620427	0.999868	0.517564
MAP3K1	0.0621039	0.999868	1.07702
PLP1	0.0621041	0.999868	-0.555122
CTRB2	0.0621909	0.999868	-0.433397
MSL1	0.0623495	0.999868	-0.601035
RBBP5	0.062561	0.999868	0.531988
LOC101930324 /// NSF	0.0625815	0.999868	0.488746
UTP6	0.0626693	0.999868	-0.486632
HK2	0.0627165	0.999868	0.769038
TPMT	0.062722	0.999868	-0.381642
BTN2A1	0.0627287	0.999868	-0.451917
PRUNE	0.0627413	0.999868	-0.345862
DUOX1	0.062881	0.999868	-0.491097
HIST1H2BM	0.0628911	0.999868	0.609304
ARL14	0.0629301	0.999868	-0.339614
GAB1	0.0630348	0.999868	-0.725712
PKNOX1	0.0630752	0.999868	0.348013
MTERF4	0.0630893	0.999868	-0.59201
ATP6V0D1	0.0630901	0.999868	-0.47721
KIR2DL4	0.0631365	0.999868	0.378796
PLCL2	0.06326	0.999868	0.518151
TIMM10B	0.0633591	0.999868	-0.350022
MYO7A	0.0634661	0.999868	-0.3508
GRIA1	0.0637486	0.999868	0.461048
GNAS	0.0638817	0.999868	0.38443
NFATC4	0.06414	0.999868	0.770269
STK19	0.0643628	0.999868	-0.547259
EMILIN2	0.0643729	0.999868	-0.692747
ENY2	0.0644941	0.999868	-0.703908
KNTC1	0.0646182	0.999868	0.666332
FAM129A	0.0647869	0.999868	0.642731
RWDD3	0.0649609	0.999868	-0.489673
SNORA5B /// TBRG4	0.0651974	0.999868	-0.905663
ZNF264	0.0654193	0.999868	0.435012
LRRC31	0.0654459	0.999868	-0.545509
BC113958	0.0657595	0.999868	0.476845
ZKSCAN1	0.0658436	0.999868	0.567159
PMEL	0.0659057	0.999868	-0.631133
RASA1	0.0659091	0.999868	0.418872
HPX	0.0659099	0.999868	-0.406315
PCYOX1	0.0659198	0.999868	0.371553
RP11-769O8.3	0.0660171	0.999868	0.435855
GMDS	0.0661667	0.999868	0.601208
ZBTB3	0.0662275	0.999868	0.573574
USP7	0.0663254	0.999868	0.450596
CLIP4	0.0663466	0.999868	0.680687
AZGP1	0.0663686	0.999868	-0.553898
INO80B	0.0664986	0.999868	0.761124
PDCL3 /// PDCL3P4	0.0665103	0.999868	0.426601
RP1-181J22.1	0.0666433	0.999868	-0.549181
GNA12	0.0668214	0.999868	0.410067
TNFRSF12A	0.0669062	0.999868	-1.11787
LOC157562	0.0669753	0.999868	-0.598904
HLA-F	0.0669762	0.999868	-0.464922
ABCA4	0.0670088	0.999868	-0.427195
C5AR2	0.0670521	0.999868	0.658542
HIST1H2AB	0.0671241	0.999868	0.486679
KIAA0753	0.067177	0.999868	0.64895
SECTM1	0.0672491	0.999868	-0.725313
PDE1B	0.0674042	0.999868	0.283233
CEMIP	0.0674967	0.999868	0.737694
NADK	0.0675841	0.999868	-0.428665
PTEN /// PTENP1	0.067724	0.999868	0.371246
MGAM	0.0677513	0.999868	1.02183
DNMT1	0.0677533	0.999868	0.475042
KRT18P38 /// KRT18P38	0.0679878	0.999868	-0.628043
ZNF226	0.0680779	0.999868	-0.531111
LAMC3	0.0681354	0.999868	0.749487
FGF13	0.0681398	0.999868	-0.469698
EDEM3	0.0682005	0.999868	0.379096
STX11	0.0683068	0.999868	-0.875621
OR10C1	0.0683672	0.999868	-0.518196
ZNF280B	0.0683737	0.999868	0.30862
LOC101929910 /// LOC613037 /// NPIPA5 /// NPIPB3 /// NPIPB4 /// NPIPB5	0.0684127	0.999868	-0.435019
HOXA4	0.0684291	0.999868	-0.63141
PCIF1	0.0684785	0.999868	-0.347238
AHCTF1	0.0685183	0.999868	0.528845
RAPGEF6	0.0685383	0.999868	-1.16912
GADD45B	0.0686243	0.999868	-0.436218
TUBB2A /// TUBB2B	0.0686431	0.999868	-0.613599
STAB1	0.0687459	0.999868	-0.400303
CCNL1	0.0688582	0.999868	-0.551351
CNOT6	0.0689482	0.999868	0.408632
LOC101928830 /// LTA4H	0.0690781	0.999868	0.6315
PNPO	0.0691065	0.999868	0.447417
AMN	0.0691186	0.999868	-0.608707
ATF5	0.069154	0.999868	-0.3657
TRNAU1AP	0.0691723	0.999868	0.67066
SLC25A11	0.0693442	0.999868	-0.409323
HTR2A	0.069369	0.999868	-0.296454
GCG	0.0696394	0.999868	-0.302953
CIB2	0.0697215	0.999868	-0.424858
TAF1C	0.0697419	0.999868	0.552907
PXDN	0.0697557	0.999868	-0.293973
APH1A	0.0699495	0.999868	-0.332642
NCOA2	0.0700771	0.999868	0.323778
CDK4	0.0702807	0.999868	-0.504471
FBXL7	0.0703224	0.999868	-0.571335
G6PD	0.0703344	0.999868	0.671139
DENND3	0.0704454	0.999868	-0.383693
MTMR3	0.0706589	0.999868	0.426659
S100A4	0.0707378	0.999868	-0.546011
HJURP	0.070858	0.999868	0.645002
MIR6834 /// PFDN6	0.0708852	0.999868	0.513509
C1orf123	0.0709278	0.999868	0.880314
SERPING1	0.0709977	0.999868	-0.957756
SCUBE3	0.0712164	0.999868	-0.591197
ETNPPL	0.0715182	0.999868	0.498612
PDK2	0.0716158	0.999868	0.801033
TIMM13	0.0716774	0.999868	-0.438041
SPIN2A /// SPIN2B	0.0716877	0.999868	-0.446109
SOD1	0.0718441	0.999868	0.558408
SLC25A14	0.0720272	0.999868	-0.550089
HMGB1	0.0720531	0.999868	0.569624
TPGS2	0.0720552	0.999868	0.398318
PAGR1	0.0720801	0.999868	0.65541
OAS1	0.0721391	0.999868	-0.798759
SCAF11	0.0721706	0.999868	0.542033
ADAR	0.0721794	0.999868	-0.48655
TUFT1	0.072248	0.999868	0.573566
SPATA7	0.0723919	0.999868	0.326529
PRMT8	0.0724507	0.999868	-0.525916
FANCI	0.0725156	0.999868	0.315577
APOLD1	0.0726113	0.999868	-0.562999
UBXN7	0.0726921	0.999868	0.479682
PSMD1	0.0728365	0.999868	0.353428
PGR	0.0729755	0.999868	-0.281214
NDUFS1	0.0730102	0.999868	0.384659
2006-03-01	0.0730131	0.999868	0.292357
FFAR3 /// GPR42	0.0730183	0.999868	-0.374362
ELOVL6	0.0732263	0.999868	0.359103
PLA2G1B	0.0732856	0.999868	-0.382027
ARPC4 /// ARPC4-TTLL3 /// TTLL3	0.0734212	0.999868	-0.495456
KIAA0141	0.0734452	0.999868	-0.430283
LIPA	0.0734501	0.999868	0.63083
FNDC3A	0.073503	0.999868	0.473403
RIT1	0.0735391	0.999868	-0.330848
KIAA0100	0.0736278	0.999868	0.748908
PPBP	0.0736304	0.999868	0.398328
OSTF1	0.0736528	0.999868	-0.506746
IFNA5 /// IFNA6	0.0736674	0.999868	-0.526547
CCDC134	0.0736784	0.999868	0.868167
PRRC2B	0.0737552	0.999868	0.562768
EHBP1	0.0737892	0.999868	0.282664
ACAD10	0.0738284	0.999868	-0.347623
PSMD3	0.0739717	0.999868	-0.489483
MOCS2	0.0739898	0.999868	0.415422
ZCWPW1	0.0741064	0.999868	-0.695573
MCF2L2	0.0743825	0.999868	-0.294924
DUSP1	0.0745221	0.999868	-0.824033
TAC3	0.0745478	0.999868	-0.576144
THAP11	0.0746783	0.999868	0.482833
DCTPP1	0.074691	0.999868	-0.548302
NOTCH2	0.0747234	0.999868	0.279928
VOPP1	0.0748533	0.999868	-0.3889
AURKC	0.074855	0.999868	-0.691392
TMPRSS15	0.0749232	0.999868	-0.373318
CC2D1A	0.0749643	0.999868	-0.289503
RCN3	0.0750226	0.999868	-0.307949
FAM153A /// FAM153B /// FAM153C /// LOC100507387 /// LOC101928349 /// LOC101930363	0.0750319	0.999868	-0.318839
SNHG17	0.0751147	0.999868	-0.470447
TXK	0.0751918	0.999868	-0.449012
SLC12A2	0.0753738	0.999868	-0.620737
SERTAD3	0.0757205	0.999868	-0.597373
HBQ1	0.0757266	0.999868	-0.440087
LONRF1	0.0757824	0.999868	-0.535489
CREBL2	0.0760996	0.999868	0.368736
TTC37	0.0762749	0.999868	0.35349
OLR1	0.0762957	0.999868	0.368141
EPHB4	0.0763809	0.999868	-0.388155
AFM	0.0763818	0.999868	0.519073
PSTPIP1	0.0764413	0.999868	-0.544789
CD3G	0.0765649	0.999868	0.904359
PFAS	0.0767764	0.999868	0.384002
PPBPP2	0.0767931	0.999868	0.441964
IFI44	0.0768281	0.999868	-1.0096
LOC100289561 /// LOC100630923 /// PRKRIP1	0.0770243	0.999868	0.630796
MARK4	0.0770318	0.999868	0.296767
LLPH	0.0770752	0.999868	0.444715
AEN	0.0771697	0.999868	-0.461818
HCG9	0.0771706	0.999868	-0.557093
RALGDS	0.0771931	0.999868	0.633729
TRPC2	0.0772174	0.999868	-0.45585
BC069756	0.0774152	0.999868	-0.587232
MED1	0.0774302	0.999868	0.444781
HLA-DRB4	0.0775013	0.999868	-0.740039
METAP1	0.0775839	0.999868	0.331303
KLF7	0.0775974	0.999868	0.452942
KIF1C	0.0776186	0.999868	0.266287
HP	0.0776431	0.999868	0.598211
RP4-560B9.4	0.0776807	0.999868	-0.418269
KDELC1	0.0778034	0.999868	0.454148
HGSNAT	0.0779797	0.999868	0.734504
LINC00837	0.0780405	0.999868	0.444248
CDK5RAP2	0.078151	0.999868	0.745192
ICAM3	0.0782078	0.999868	-0.614734
RCOR1	0.0782189	0.999868	0.390934
TRIM16	0.0782566	0.999868	-0.390838
IMP3	0.0783543	0.999868	-0.488077
XPC	0.0783812	0.999868	0.621683
RGS4	0.0783918	0.999868	-0.338074
LAG3	0.0784118	0.999868	0.664083
ZNF580	0.078852	0.999868	0.789566
ASPSCR1	0.0788693	0.999868	-0.443265
HPN	0.0790651	0.999868	-0.536341
SNRPB2	0.0792803	0.999868	-0.729345
CGA	0.0794136	0.999868	-0.645411
UBXN2B	0.0794386	0.999868	0.748919
VIPAS39	0.0795244	0.999868	0.369951
FBXO38	0.0796946	0.999868	0.337969
VAC14	0.0797296	0.999868	0.275214
FBXO16 /// ZNF395	0.0797654	0.999868	0.674788
IPO7	0.0799139	0.999868	0.348201
PERP	0.0799394	0.999868	-0.466593
SRGAP3	0.0799487	0.999868	-0.434024
CLINT1	0.0800092	0.999868	0.457531
BMP6	0.0800331	0.999868	0.309712
TRDV3	0.080136	0.999868	0.782343
POU3F4	0.0802536	0.999868	0.418751
MBTPS1	0.0804052	0.999868	-0.464208
TOPBP1	0.0804356	0.999868	0.481603
BASP1	0.0805226	0.999868	0.505737
MATN3	0.0805656	0.999868	0.283729
ZNF3	0.0805894	0.999868	-0.33909
NUP37	0.0806207	0.999868	0.484354
GLE1	0.0808092	0.999868	-0.372468
FAU	0.0809045	0.999868	-0.571198
GALK2	0.0809185	0.999868	-0.304923
NBEAL1 /// RPL12	0.0810841	0.999868	-0.381614
CXCL8	0.0812551	0.999868	-1.1142
CLN3	0.081323	0.999868	-0.486152
ZNF780B	0.0813508	0.999868	-0.349051
POLD1	0.0813537	0.999868	-0.601857
CAPN9	0.0815032	0.999868	-0.517187
ACOT9	0.0815136	0.999868	-0.48817
FOLR3	0.0815352	0.999868	1.42659
NPEPPS	0.0817681	0.999868	0.450017
CABYR	0.0818236	0.999868	-0.523464
FYB	0.0818623	0.999868	0.577567
RPP38	0.081956	0.999868	-0.572696
ZNF259P1 /// ZPR1	0.082008	0.999868	-0.673812
KIAA1279	0.0820615	0.999868	0.336761
ZCCHC2	0.082166	0.999868	-0.44588
ANPEP	0.0823988	0.999868	0.497384
ABCG1	0.0824232	0.999868	-0.45707
STARD13	0.0824469	0.999868	0.58764
ADRB1	0.0825277	0.999868	-0.313003
LIMS1 /// LIMS3 /// LIMS3L	0.0825374	0.999868	0.687706
S1PR1	0.0825598	0.999868	0.390652
ZNF250	0.0825993	0.999868	0.846841
SPICE1	0.0826228	0.999868	-0.457867
FOXO1	0.0826422	0.999868	-0.521852
BTD	0.0827145	0.999868	0.395703
CKAP5	0.0830081	0.999868	0.324757
BBOX1	0.0830962	0.999868	0.554886
HOXA11	0.0833465	0.999868	-0.337593
CENPB	0.0833888	0.999868	-0.356599
CYTH1	0.083391	0.999868	-0.424236
LDHA	0.0834033	0.999868	0.542433
EMP3	0.0834253	0.999868	-0.490094
CHAF1A	0.0834325	0.999868	0.322337
SERPINA2	0.0834409	0.999868	-0.429462
TRAP1	0.0835291	0.999868	-0.428814
ISG15	0.0837266	0.999868	-1.72388
GOSR2	0.0838498	0.999868	-0.331921
PSMC3IP	0.0838701	0.999868	0.576337
PTMS	0.0839068	0.999868	0.314268
GPKOW	0.0840475	0.999868	-0.523352
NARF	0.0842635	0.999868	0.86465
REST	0.0844694	0.999868	0.595721
PTTG3P	0.0846059	0.999868	0.685639
SPTA1	0.0848171	0.999868	0.443728
MIA3	0.0848725	0.999868	-0.390866
MED13L	0.0851698	0.999868	0.403505
CHD1L	0.0852135	0.999868	0.299025
MYO3A	0.0853383	0.999868	-0.31927
LPIN1	0.0854282	0.999868	-0.463629
RNF24	0.0854476	0.999868	-0.675443
PSME1	0.0854612	0.999868	-0.617208
MMP7	0.0855776	0.999868	-0.407739
SLC39A8	0.0855858	0.999868	0.448345
MARK1	0.0857038	0.999868	-0.397819
IL17RC	0.0857126	0.999868	-0.437668
ABCC3	0.0857824	0.999868	0.429393
CERS6	0.0858045	0.999868	0.31349
FBXO5	0.0858182	0.999868	0.463565
MLH1	0.0858842	0.999868	-0.301046
TUBB3	0.0858886	0.999868	-0.57423
PPIAP21 /// PPIAP21	0.0859442	0.999868	-0.66788
KLC2	0.0860008	0.999868	0.782461
MPL	0.0860096	0.999868	0.338333
CEP170B	0.0863615	0.999868	-0.410794
DUT	0.0864683	0.999868	0.449208
DDX56	0.0865034	0.999868	0.692917
MMP8	0.086537	0.999868	0.847236
C10orf76	0.0865491	0.999868	0.395639
ZNF7	0.0865895	0.999868	0.313878
OGFOD2	0.0866251	0.999868	-0.387279
UBAP1	0.0866936	0.999868	0.479335
MAP3K12	0.0868675	0.999868	0.302743
RC3H2	0.0869485	0.999868	0.339612
CCDC30	0.0869725	0.999868	-0.516023
CHST2	0.0869973	0.999868	0.704217
EHBP1L1	0.0873091	0.999868	-0.41265
PRAMEF1 /// PRAMEF2	0.0873396	0.999868	0.354235
RP4-781L3.1	0.0873617	0.999868	-0.584037
SERPINA3	0.0875348	0.999868	-0.784136
KIF24	0.0876343	0.999868	-0.369794
MMS19	0.0876899	0.999868	-0.496853
DOLPP1	0.0877796	0.999868	-0.405836
GRB10	0.0879106	0.999868	0.449438
ADPRM	0.0880642	0.999868	0.607333
ARMCX6	0.0883971	0.999868	-0.314248
TOR1B	0.0884662	0.999868	-0.577303
ADAM20	0.0884769	0.999868	0.258247
RAF1	0.0886041	0.999868	-0.436623
MX1	0.0886615	0.999868	-1.28601
FOXG1	0.088784	0.999868	-0.249644
UBR7	0.0887906	0.999868	0.422539
KIR2DL1	0.0888959	0.999868	0.707674
TDRD3	0.0889266	0.999868	0.465063
ZNF586	0.088953	0.999868	-0.338846
TMEM106B	0.0889755	0.999868	0.499559
DBNDD2 /// SYS1 /// SYS1-DBNDD2	0.0890227	0.999868	0.479825
KCNJ6	0.0890881	0.999868	0.358586
FAM8A1	0.0891003	0.999868	-0.935944
KIAA0247	0.0891219	0.999868	-0.476683
PGK2	0.0892131	0.999868	-0.316534
FERMT2	0.0892189	0.999868	-0.285275
METTL4	0.0892492	0.999868	-0.350419
RASA2	0.0892803	0.999868	0.491436
MAP1B	0.0893689	0.999868	0.397534
ECHDC1	0.0894392	0.999868	-0.461209
PGBD5	0.0897123	0.999868	0.378145
CEBPA-AS1	0.0899312	0.999868	0.443497
ZNF292	0.0900152	0.999868	0.48835
ADAT1	0.0901414	0.999868	-0.387409
LUZP2	0.0901644	0.999868	-0.546767
FLRT3	0.0901754	0.999868	-0.577941
SMR3A	0.0901955	0.999868	0.429392
ABCC4	0.0901995	0.999868	0.458212
GDI1	0.0903533	0.999868	-0.482373
SH3BP1	0.090404	0.999868	0.611428
KDM5D	0.0904217	0.999868	1.30759
BAALC	0.0904801	0.999868	0.473713
SAA2-SAA4 /// SAA4	0.0907719	0.999868	0.428389
BATF	0.09081	0.999868	-0.46708
PHKA2	0.0908429	0.999868	-0.288267
SETD6	0.0909135	0.999868	0.385619
HIST1H2AE	0.0913063	0.999868	0.527017
EMR1	0.0913666	0.999868	1.01359
PRKX /// PRKY	0.0915221	0.999868	-0.402597
SEMG1	0.0915581	0.999868	0.405699
STK3	0.091617	0.999868	0.368714
S100A13	0.0916506	0.999868	0.505642
ELP3	0.0917834	0.999868	-0.418496
MIR6732 /// ZC3H12A	0.0918317	0.999868	-0.634262
ATXN7	0.091984	0.999868	-0.448469
DMXL1	0.0920417	0.999868	0.405944
BGN	0.092051	0.999868	-0.302126
TNF	0.0920914	0.999868	-0.530123
STAT1	0.0921763	0.999868	-0.504925
PRSS3P2	0.0921842	0.999868	-0.536554
BAG6	0.0922156	0.999868	0.464842
KRCC1	0.0923064	0.999868	-0.528503
DNAJA1P4 /// DNAJA1P4	0.0923464	0.999868	-0.545702
DOC2A	0.0924475	0.999868	0.528191
GIMAP4	0.0928684	0.999868	-0.485898
HK2 /// RP11-259N19.1	0.0929031	0.999868	0.549914
NAGA	0.0930067	0.999868	-0.298566
PSMB4	0.0930249	0.999868	-0.500932
DNAJA3	0.0930256	0.999868	-0.388084
CLCA3P	0.0930777	0.999868	0.25912
FAM86C1	0.0931882	0.999868	-0.339351
HNRNPK	0.0932476	0.999868	-0.427136
PNP	0.0934516	0.999868	0.640868
CEACAM6	0.0935426	0.999868	0.721622
NDUFB2-AS1	0.0937409	0.999868	-0.320803
COIL	0.093801	0.999868	0.499764
PMS2P8	0.0938236	0.999868	-0.369151
MXRA7	0.0939364	0.999868	0.498486
BSPRY	0.0941821	0.999868	0.637268
SDHA	0.0942022	0.999868	-0.477808
GPR88	0.0943214	0.999868	0.319348
CIR1	0.0943289	0.999868	-0.387848
RIPPLY3	0.0944436	0.999868	0.557391
SLC1A7	0.0945403	0.999868	-0.355572
NRBP1	0.0945965	0.999868	-0.645809
PRDM13	0.0947971	0.999868	0.337354
IFI30 /// PIK3R2	0.0948256	0.999868	-0.519185
PPP2R5B	0.0948427	0.999868	-0.436269
ISG20	0.0948782	0.999868	-0.692876
PKN1	0.094927	0.999868	-0.510959
ST3GAL6	0.094957	0.999868	-0.260244
CLIC2	0.0949755	0.999868	0.771392
BCL11A	0.0950817	0.999868	0.352489
INF2	0.0951705	0.999868	-0.461759
ZFP36	0.0952232	0.999868	-0.601531
RNF146	0.0953358	0.999868	-0.591802
OBSCN	0.0953433	0.999868	0.243312
TELO2	0.0954953	0.999868	0.335779
TUBB2A	0.0956421	0.999868	-1.38638
ARPC4 /// ARPC4-TTLL3	0.0959738	0.999868	-0.944132
2001-03-01	0.0959817	0.999868	0.476243
NUDT4 /// NUDT4P1 /// NUDT4P2	0.0959846	0.999868	0.58303
SSTR3	0.0960249	0.999868	-0.454104
IGHG1 /// IGHG2 /// IGHM /// IGHV4-31 /// MIR8071-1 /// MIR8071-2	0.0960391	0.999868	0.81496
PSORS1C1	0.0960496	0.999868	-0.55454
IQCC	0.0960926	0.999868	-0.526295
PDE4B	0.096187	0.999868	-0.391105
MPHOSPH9	0.0962781	0.999868	0.512728
ANO2	0.096382	0.999868	-0.361097
SOGA1	0.0964347	0.999868	0.305733
TRIB2	0.096894	0.999868	-0.504386
FIG4	0.0970794	0.999868	0.485962
HOXD9	0.0973593	0.999868	-0.32248
GLUD2	0.0973978	0.999868	-0.362328
NAIP	0.097448	0.999868	0.498632
ANKRD6	0.0975063	0.999868	-0.316743
DKFZP586I1420	0.0975804	0.999868	-0.47388
MIA	0.0977847	0.999868	0.775006
GYPA	0.0977873	0.999868	0.568644
TRIM25	0.097814	0.999868	-0.6274
IBA57	0.0978573	0.999868	0.540956
TTC9	0.0978793	0.999868	-0.405948
PAN2	0.0979199	0.999868	-0.549329
KLHL25	0.0979681	0.999868	0.55756
SEC22A	0.0980376	0.999868	-0.380853
SDK2	0.0981281	0.999868	0.385531
GFOD2	0.0982649	0.999868	0.468803
MRAS	0.0983092	0.999868	-0.374946
UQCC1	0.0983235	0.999868	0.465646
SLC5A2	0.0983782	0.999868	0.493871
GJA4	0.0985268	0.999868	-0.31592
OSGIN1	0.0985885	0.999868	-0.427394
PTTG1IP	0.0990046	0.999868	-0.406498
SCGN	0.0990236	0.999868	-0.674203
CHMP1B	0.0990447	0.999868	-0.278519
SCAI	0.0990749	0.999868	0.340129
CRYBA1	0.0991084	0.999868	-0.504923
KRT10	0.0991348	0.999868	-0.518475
NSA2	0.099393	0.999868	-0.580364
USP47	0.0994547	0.999868	0.451804
ENTPD1	0.0995961	0.999868	-0.335793
CD300A	0.0996238	0.999868	-0.470426
CCDC70	0.0996367	0.999868	-0.515223
GABARAPL2	0.0996722	0.999868	0.579954
APRT	0.0997072	0.999868	-0.462735
ZNF148	0.0998344	0.999868	0.493275
EPB42	0.099844	0.999868	0.837833
HAUS2	0.0999019	0.999868	-0.460185
PCDHGB5	0.100334	0.999868	-0.722954
HCG4	0.100362	0.999868	0.352418
CRYL1	0.100399	0.999868	0.425507
RHEB	0.100674	0.999868	0.286364
ACP1	0.101056	0.999868	-0.504124
ECHS1	0.101107	0.999868	-0.671331
CDX4	0.10113	0.999868	0.425441
DCXR	0.101152	0.999868	-0.596221
ATAD2	0.101363	0.999868	0.363241
EDEM2	0.101471	0.999868	-0.562042
EIF4A1 /// LOC101928634 /// SENP3-EIF4A1 /// SNORA48 /// SNORA67 /// SNORD10	0.101502	0.999868	-0.354214
HELLS	0.10153	0.999868	0.450101
FXR2	0.101582	0.999868	0.350595
NUDT3 /// RPS10-NUDT3	0.101676	0.999868	-0.493542
PSRC1	0.101697	0.999868	-0.502655
ZNF81	0.101733	0.999868	-0.370351
PPP1R15A	0.10205	0.999868	-0.978332
BBX	0.102141	0.999868	0.638181
TXLNA	0.102155	0.999868	0.718447
NME3	0.102182	0.999868	0.626931
SSX2IP	0.102238	0.999868	-0.294837
ROR1	0.10234	0.999868	0.256908
DHRS12	0.102362	0.999868	-0.52033
SEMA6A	0.102393	0.999868	-0.250337
USP19	0.102428	0.999868	0.439114
PALMD	0.102523	0.999868	-0.425356
PRKAR2B	0.102525	0.999868	0.68947
LIME1 /// ZGPAT	0.10259	0.999868	0.384354
ANGPTL7	0.102632	0.999868	-0.489177
LOC102723559	0.102853	0.999868	-0.636959
PLAUR	0.10309	0.999868	-0.445433
CST2	0.103216	0.999868	0.573681
LOC100293211	0.103235	0.999868	-0.528791
PILRA	0.103263	0.999868	-0.429185
C11orf30	0.103318	0.999868	0.532821
PAX3	0.103369	0.999868	-0.337938
USP25	0.103408	0.999868	0.377101
TWISTNB	0.103412	0.999868	-0.453346
ZNF593	0.103539	0.999868	-0.402367
SHPK /// TRPV1	0.103543	0.999868	-0.475063
COLEC11	0.103586	0.999868	0.597593
MAP7D1	0.10359	0.999868	-0.436429
ITCH	0.103775	0.999868	0.308504
SPRY1	0.10406	0.999868	-0.548382
AP3D1	0.104097	0.999868	0.44736
CHRM5	0.104098	0.999868	-0.735227
NADSYN1	0.104193	0.999868	0.403923
CALCB	0.104356	0.999868	0.487788
LGALS13	0.104371	0.999868	0.701769
RP3-507I15.1	0.104398	0.999868	-0.650002
RBMX2	0.104411	0.999868	-0.347945
CTBS	0.104425	0.999868	0.386837
ARNTL	0.104496	0.999868	-0.426594
PLA2G4A	0.104503	0.999868	0.35453
TRBC1	0.104527	0.999868	-0.329342
RPL12	0.104527	0.999868	-0.330665
MPP2	0.105078	0.999868	-0.603596
IER3	0.10522	0.999868	-0.578972
DHX29	0.105237	0.999868	0.636165
SLC35B1	0.105271	0.999868	-0.39976
RBM48	0.105506	0.999868	-0.397367
CD2BP2	0.105514	0.999868	-0.439347
INSR	0.105524	0.999868	0.405536
CTNNBIP1	0.105591	0.999868	-0.579038
PLEKHF2	0.105635	0.999868	-0.506702
IDUA	0.105659	0.999868	-0.237904
PHB	0.105714	0.999868	-0.34725
ASB9	0.105882	0.999868	-0.396092
BPGM	0.106156	0.999868	0.647644
NPC1L1	0.10623	0.999868	-0.519488
TPR	0.106291	0.999868	0.443877
TTLL7	0.106667	0.999868	-0.41591
CTAGE5	0.106736	0.999868	0.474439
GRK4	0.106752	0.999868	0.290661
CEP104	0.106823	0.999868	-0.327028
BUB3	0.10686	0.999868	0.333015
CLSTN2	0.106955	0.999868	0.479057
CHODL	0.107	0.999868	0.391856
LMO1	0.107085	0.999868	-0.441344
TXLNG	0.107274	0.999868	0.422688
GDI2	0.107612	0.999868	-0.394655
CCNT1	0.107727	0.999868	0.9932
PTBP1	0.108008	0.999868	-0.268731
NEUROG1	0.108104	0.999868	0.469334
MTA1	0.10811	0.999868	-0.253231
KCNQ3	0.108209	0.999868	0.586467
TAS2R14	0.108228	0.999868	-0.377119
RPLP2 /// SNORA52	0.108271	0.999868	-0.503267
SLC34A2	0.108274	0.999868	-0.551987
PPP1CC	0.10828	0.999868	0.587629
MIS18A	0.108287	0.999868	-0.38179
SF3B1	0.108301	0.999868	0.591358
PRSS2	0.108449	0.999868	0.331171
ATXN2	0.108517	0.999868	-0.332509
PRRG4	0.108686	0.999868	-0.507336
TAF15	0.108689	0.999868	-0.386459
CLCNKA /// CLCNKB	0.108825	0.999868	-0.461082
EXD3	0.10889	0.999868	-0.599334
KLK10	0.109246	0.999868	-0.321143
HNRNPUL2 /// HNRNPUL2-BSCL2	0.109249	0.999868	-0.323937
DLGAP5	0.109349	0.999868	0.551213
MFSD1	0.10935	0.999868	0.402707
STAT3	0.109367	0.999868	-0.377228
F8A1 /// F8A2 /// F8A3	0.10943	0.999868	0.490097
ARHGAP10	0.109437	0.999868	0.49113
MRPS22	0.109491	0.999868	-0.410578
SLC28A2	0.109568	0.999868	0.435969
RPS4Y1	0.109699	0.999868	2.49659
CEACAM21	0.109756	0.999868	-0.553452
POLM	0.109879	0.999868	0.435779
MRPS14	0.109895	0.999868	-0.389181
STYXL1	0.109971	0.999868	-0.552158
DDX6	0.110024	0.999868	0.405158
SNPH	0.11004	0.999868	-0.353164
ARVCF	0.11013	0.999868	-0.514024
MEIS1	0.110179	0.999868	0.399968
TMPRSS11D	0.110321	0.999868	-0.508385
SLC11A2	0.110474	0.999868	-0.290136
DRD2	0.110527	0.999868	-0.350428
PODNL1	0.110684	0.999868	-0.479895
OSGIN2	0.110755	0.999868	-0.296021
OR7E12P	0.110766	0.999868	0.391302
MPZL2	0.110834	0.999868	-0.255104
MCF2	0.110926	0.999868	0.375022
TMCC2	0.110928	0.999868	1.29936
ACPP	0.111001	0.999868	-0.368297
IQGAP1	0.111445	0.999868	0.501589
SUZ12 /// SUZ12P1	0.111486	0.999868	0.418644
HNRNPA1 /// HNRNPA1P10	0.111566	0.999868	0.417489
MEPCE	0.111608	0.999868	0.624711
FBXL14	0.111673	0.999868	-0.432525
UBE2W	0.111737	0.999868	-0.421159
GLI1	0.111972	0.999868	-0.458599
SMARCC2	0.112134	0.999868	0.437387
SIDT2	0.112208	0.999868	0.458715
WDR78	0.112208	0.999868	-0.456062
ATG2A	0.112368	0.999868	-0.359656
LIMS1 /// LIMS3L	0.112373	0.999868	0.600143
AKAP2 /// PALM2-AKAP2	0.112373	0.999868	0.281156
OR2H2	0.112461	0.999868	-0.370989
PAQR6	0.112465	0.999868	-0.746942
ALDOC	0.112468	0.999868	0.369658
ABCD1	0.11247	0.999868	0.598503
NFYC	0.112664	0.999868	-0.34726
CSDE1	0.112668	0.999868	0.394826
SLC25A4	0.112746	0.999868	-0.340385
ANXA3	0.112789	0.999868	0.674699
DAPK3 /// MIR637	0.112942	0.999868	0.258861
CPOX	0.113209	0.999868	0.427613
EFNB1	0.113394	0.999868	-0.518617
RHOBTB3	0.113487	0.999868	-0.358051
GPR64	0.113502	0.999868	-0.375787
CSPG4	0.113648	0.999868	-0.314819
PRRC2C	0.113673	0.999868	0.351014
FADD	0.113801	0.999868	-0.566886
BCAS2	0.11392	0.999868	-0.466474
RARRES3	0.113931	0.999868	-0.453892
GFOD1	0.113936	0.999868	0.589612
GYS1	0.113969	0.999868	0.364437
GTPBP3	0.114031	0.999868	-0.393112
TET3	0.114069	0.999868	0.54728
LSM4	0.114082	0.999868	-0.316098
CHST11	0.114095	0.999868	-0.556101
KLF9	0.114102	0.999868	0.398724
RUVBL1	0.11422	0.999868	-0.680128
GRM7 /// LOC100996542	0.114239	0.999868	-0.362105
C5	0.114387	0.999868	0.553416
LOC100294145	0.114407	0.999868	0.46396
GTF2F2	0.114522	0.999868	-0.432541
GABRQ	0.114687	0.999868	-0.614529
TFAM	0.114738	0.999868	0.305881
AMDHD2 /// CEMP1	0.114778	0.999868	-0.499173
NPHP1	0.114869	0.999868	0.523101
TP53BP1	0.114955	0.999868	0.410822
METAP2	0.115018	0.999868	0.310106
ZNF268	0.115134	0.999868	0.354556
SERPINB10	0.115194	0.999868	0.70954
APPBP2	0.115217	0.999868	0.239564
GALE	0.11522	0.999868	-0.539898
REEP4	0.115276	0.999868	-0.595007
RSF1	0.115387	0.999868	0.392851
BMP2K	0.11547	0.999868	0.388819
AHCYL1	0.115529	0.999868	0.26274
RAG1	0.115671	0.999868	0.469868
FAM134A	0.115799	0.999868	0.382221
DYNC1I2	0.115809	0.999868	0.355962
PI4KA /// PI4KAP1 /// PI4KAP2	0.11582	0.999868	-0.355016
TCIRG1	0.115828	0.999868	-0.609476
RAB36	0.115858	0.999868	-0.419388
MIR6805 /// RPL28	0.115896	0.999868	-0.350733
TBC1D5	0.115955	0.999868	0.297523
TRIP13	0.116032	0.999868	0.298886
CD24	0.116084	0.999868	0.61031
HTATSF1	0.116325	0.999868	0.291208
PCK1	0.116342	0.999868	-0.26143
CUX2	0.116407	0.999868	-0.479039
GALNT2	0.116451	0.999868	0.401482
BTBD18	0.116479	0.999868	-0.547559
ERBB2	0.116538	0.999868	0.347404
ORC2	0.116616	0.999868	0.509573
NEURL1	0.116676	0.999868	-0.317413
TEX40	0.116687	0.999868	0.750001
PDCD6	0.116759	0.999868	-0.347127
SAC3D1	0.116764	0.999868	0.681638
MS4A12	0.11677	0.999868	-0.485881
LRRC49	0.116891	0.999868	0.395339
SLC5A3	0.117454	0.999868	0.349854
SSX3	0.117481	0.999868	-0.312778
ZNF442	0.117619	0.999868	-0.424006
KLKB1	0.117798	0.999868	0.361494
PPP1R11	0.117864	0.999868	-0.373376
EMC2	0.11789	0.999868	-0.516035
CNBP	0.117926	0.999868	-0.689861
OR10H1	0.117978	0.999868	-0.436215
DPH2	0.118012	0.999868	-0.526198
SYN3	0.118077	0.999868	-0.270323
BTBD3	0.118111	0.999868	-0.365001
EPB41L4B	0.118284	0.999868	-0.346422
CT55	0.118286	0.999868	0.360645
RAB30	0.118402	0.999868	-0.374818
GAS2	0.118462	0.999868	-0.340086
RHD	0.118569	0.999868	0.455766
SLC22A6	0.118709	0.999868	-0.309104
POU5F1P4	0.118782	0.999868	0.351841
CFB	0.11883	0.999868	-0.365933
KCNA1	0.119003	0.999868	-0.497684
CYHR1	0.119044	0.999868	-0.344542
CRISP3	0.119079	0.999868	0.758379
IFNA21	0.119148	0.999868	0.550899
CD82	0.119218	0.999868	-0.534584
ZBTB48	0.11943	0.999868	0.453604
TMEM57	0.119434	0.999868	0.629271
ABL2	0.119476	0.999868	-0.545423
USP12	0.119504	0.999868	0.625558
SLC25A46	0.119532	0.999868	0.414511
SNCB	0.119626	0.999868	-0.531344
EDA2R	0.119665	0.999868	0.653288
OR1F1	0.119764	0.999868	-0.411595
UBE2V2	0.11988	0.999868	-0.516356
IFRD2	0.119968	0.999868	0.502506
SPP1	0.119974	0.999868	0.485605
GBX2	0.120006	0.999868	-0.282614
NR0B1	0.120065	0.999868	-0.354221
SPAG5	0.120137	0.999868	-0.375911
SALL2	0.120197	0.999868	0.429592
USP13	0.120254	0.999868	0.520702
SH3GL3	0.120294	0.999868	0.360115
C22orf29 /// GNB1L	0.120371	0.999868	0.416655
XRCC1	0.120384	0.999868	0.333105
PRDM16	0.120385	0.999868	-0.471637
PTGES2	0.120478	0.999868	0.536521
LGALS1	0.120575	0.999868	-0.694508
TTC39A	0.120593	0.999868	-0.284169
CPTP	0.120634	0.999868	-0.496326
ASUN	0.120711	0.999868	-0.54056
ELOVL2	0.12078	0.999868	-0.312001
TMEM35	0.120807	0.999868	-0.30222
CYSLTR1	0.12089	0.999868	-0.332849
GLRX5	0.120994	0.999868	0.854037
LINC00599 /// MIR124-1	0.120998	0.999868	-0.465661
KRT19P2 /// MIR492	0.121098	0.999868	0.346136
ASAP1	0.121111	0.999868	0.541083
HIST1H3A /// HIST1H3B /// HIST1H3C /// HIST1H3D /// HIST1H3E /// HIST1H3F /// HIST1H3G /// HIST1H3H /// HIST1H3I /// HIST1H3J	0.121124	0.999868	0.557791
HUNK	0.121137	0.999868	-0.289624
KLK15	0.121242	0.999868	0.36582
GABBR1 /// UBD	0.121248	0.999868	-0.348786
PRTN3	0.121263	0.999868	0.897308
DCP2	0.12157	0.999868	0.459441
GALNT7	0.121581	0.999868	0.520798
ANKRD46	0.121634	0.999868	-0.302208
PDE6H	0.121947	0.999868	-0.318308
KRT35	0.122062	0.999868	0.420423
SNAPC1	0.122187	0.999868	0.383222
PAK3	0.122341	0.999868	-0.377162
MRPS35	0.122361	0.999868	-0.441167
CBLB	0.12246	0.999868	0.270679
CPSF1 /// MIR1234 /// MIR6849 /// MIR939	0.122568	0.999868	0.558671
CGRRF1	0.122685	0.999868	-0.348664
OSGEPL1	0.122689	0.999868	0.478481
C1orf95	0.123044	0.999868	-0.600342
CHRM2	0.123133	0.999868	0.496087
PCDHB6	0.123137	0.999868	0.473239
LRRC2	0.123348	0.999868	0.341465
XK	0.123591	0.999868	0.733274
RAI1	0.12363	0.999868	0.387538
FAM174B	0.123749	0.999868	0.303978
SIRPAP1 /// SIRPAP1	0.123934	0.999868	-0.619513
GIPR	0.124019	0.999868	0.343744
USP36	0.124025	0.999868	-0.379167
AHR	0.124058	0.999868	0.399959
LOC102724250 /// NBPF1 /// NBPF10 /// NBPF11 /// NBPF14 /// NBPF15 /// NBPF19 /// NBPF26	0.124072	0.999868	-0.740177
FBXW4P1	0.124199	0.999868	-0.437623
KLHL35	0.124253	0.999868	-0.319752
MRPL11	0.124439	0.999868	-0.308563
DCAF13	0.124575	0.999868	0.335871
TSR2	0.124665	0.999868	-0.295723
KHSRP	0.12476	0.999868	0.508285
UXS1	0.12489	0.999868	-0.48836
BZW1	0.124967	0.999868	-0.385082
HAGH	0.125053	0.999868	-0.469368
BRF2	0.12508	0.999868	0.308986
CLCA2	0.125104	0.999868	0.24441
TTC26	0.125158	0.999868	0.689057
SLC19A1	0.125383	0.999868	-0.460351
DGCR6 /// DGCR6L	0.1257	0.999868	-0.544469
CHST12	0.12572	0.999868	-0.501606
ACSL3	0.125742	0.999868	0.368265
WDR82	0.125755	0.999868	0.391207
PVR	0.125849	0.999868	-0.301506
ENTPD5	0.125906	0.999868	0.419326
TXNL1	0.126051	0.999868	0.272541
PRRG1	0.126148	0.999868	-0.494596
ZAK	0.126156	0.999868	0.429221
CASP1	0.126325	0.999868	-0.447739
FLOT1	0.126326	0.999868	-0.369345
KLHL29	0.126342	0.999868	-0.536358
GMFB	0.126383	0.999868	0.314954
TARBP2	0.126413	0.999868	-0.420363
MTRF1	0.126697	0.999868	0.385262
ARF5	0.12686	0.999868	-0.525787
APIP	0.127088	0.999868	-0.476922
ARHGEF2	0.127387	0.999868	0.35433
MYL10	0.127465	0.999868	0.342864
PURG	0.127498	0.999868	-0.352934
GTF2IRD1	0.127592	0.999868	0.826686
MATK	0.127626	0.999868	-0.59791
GUK1	0.127666	0.999868	-0.437011
TMEM51	0.127841	0.999868	-0.442929
SLC43A3	0.127878	0.999868	-0.32785
SOWAHC	0.128005	0.999868	-0.443433
NKX2-2	0.128022	0.999868	-0.276416
UTP3	0.128074	0.999868	0.612796
DLAT	0.128111	0.999868	-0.256106
TTC18	0.128154	0.999868	0.82645
FLRT1	0.1282	0.999868	-0.355303
NCF1	0.128313	0.999868	-0.517563
SPRR3	0.128339	0.999868	0.339661
INSL3	0.128389	0.999868	0.339488
MYB	0.128412	0.999868	0.334193
RCBTB1	0.128412	0.999868	0.362278
HLA-DQA1	0.128463	0.999868	1.18334
ARL6IP4	0.128707	0.999868	-0.411298
LILRA3	0.128834	0.999868	-0.846159
CACTIN	0.128945	0.999868	-0.281144
WDR83OS	0.129105	0.999868	-0.382751
SPATA5L1	0.129194	0.999868	0.31285
WDR62	0.129209	0.999868	-0.572931
MAFF	0.129317	0.999868	-0.507065
DGKG	0.129369	0.999868	0.373634
AZU1	0.12938	0.999868	0.874328
SS18	0.12943	0.999868	-0.247019
ITIH2	0.129441	0.999868	-0.499709
CDH16	0.129457	0.999868	-0.614356
KIAA0232	0.129461	0.999868	0.481899
AGFG1	0.129526	0.999868	0.374145
MCTP2	0.129539	0.999868	0.434674
PPP4C	0.129569	0.999868	0.617871
GAP43	0.129614	0.999868	0.263708
UBE2E3	0.129727	0.999868	0.493461
MPI	0.130188	0.999868	0.480446
ARHGAP17	0.130278	0.999868	-0.509077
KRT86 /// LOC100509764	0.13043	0.999868	-0.297395
GABRB3	0.130445	0.999868	-0.371048
PELI1	0.130461	0.999868	-0.68156
THBS1	0.130914	0.999868	0.244241
CDS1	0.13095	0.999868	-0.227632
COPS7B	0.130961	0.999868	-0.504482
RPL22	0.13108	0.999868	-0.474643
EOGT	0.131115	0.999868	0.407749
LOC101929232 /// PDCD6IPP2	0.131118	0.999868	-0.7259
GAGE1 /// GAGE12B /// GAGE12C /// GAGE12D /// GAGE12E /// GAGE12F /// GAGE12G /// GAGE12H /// GAGE12I /// GAGE12J /// GAGE13 /// GAGE2D /// GAGE4 /// GAGE5 /// GAGE6 /// GAGE7	0.131127	0.999868	-0.661565
RAD9A	0.131262	0.999868	-0.66259
RPAP1	0.131326	0.999868	0.811603
GDNF	0.131422	0.999868	-0.430475
RPN1	0.131459	0.999868	-0.598406
TRPC6	0.131552	0.999868	-0.307049
KIF5B	0.131568	0.999868	0.271092
DDX52	0.131846	0.999868	0.234193
ZNF318	0.131855	0.999868	0.329395
FAM182A /// FAM182B /// FAM27B /// FAM27C	0.131948	0.999868	-0.345006
CBY1	0.132024	0.999868	0.773234
ELF4	0.132043	0.999868	-0.443848
PTGIS	0.132146	0.999868	-0.300939
SRPX	0.132152	0.999868	-0.353653
HIST1H2AM	0.132228	0.999868	0.434986
GPR125	0.132396	0.999868	0.34816
MYO1B	0.132446	0.999868	-0.225524
IL6ST	0.132457	0.999868	0.317633
RNF19B	0.132574	0.999868	-0.647166
FAM105A	0.132594	0.999868	0.277528
CSF1R	0.132654	0.999868	0.443228
BCL7B	0.132688	0.999868	-0.436854
BAG3	0.132744	0.999868	0.453154
APOA2	0.132765	0.999868	-0.29537
2007-09-01	0.132834	0.999868	-0.33165
THSD7A	0.132896	0.999868	-0.335707
NUCB1	0.132947	0.999868	-0.512401
S100A3	0.132954	0.999868	-0.431756
CHERP	0.133003	0.999868	0.327821
SLC26A4	0.133068	0.999868	0.425381
TTC17	0.133073	0.999868	-0.365261
CYP7A1	0.133437	0.999868	0.282606
HOMER1	0.133524	0.999868	0.372466
IGHG1	0.133685	0.999868	0.441556
SH3GLB2	0.133687	0.999868	-0.347114
SCD5	0.133935	0.999868	0.539358
TSEN2	0.13398	0.999868	0.384365
RASL11B	0.134037	0.999868	-0.44106
AC104537.2 /// TCEB1P28	0.134175	0.999868	0.304145
CHRNA10	0.134191	0.999868	-0.436022
RXRG	0.134209	0.999868	-0.335804
CD177	0.134359	0.999868	1.03924
CS	0.13448	0.999868	0.41119
IGF2R	0.134648	0.999868	0.542909
RPF1	0.134945	0.999868	-0.473661
MAGEF1	0.135023	0.999868	0.384018
DPYSL2	0.135043	0.999868	0.556848
CLEC5A	0.135055	0.999868	0.381533
ARHGEF38	0.135089	0.999868	-0.561901
ATP5B	0.135135	0.999868	0.336168
PMM2	0.135139	0.999868	-0.624896
NPM3	0.135161	0.999868	-0.31088
RIT2	0.135207	0.999868	-0.497132
DYRK3	0.135226	0.999868	0.436901
ACVR1	0.13529	0.999868	0.270773
PPP1R16B	0.135444	0.999868	0.553795
CYP3A4	0.135621	0.999868	0.240881
SLC39A7	0.135659	0.999868	0.441315
EPCAM	0.135771	0.999868	0.439637
CLCF1	0.135813	0.999868	0.535079
C1QA	0.13616	0.999868	0.661377
ZNF205-AS1	0.136256	0.999868	-0.516371
GOLIM4	0.136434	0.999868	0.46423
CTC-428G20.3	0.136509	0.999868	-0.378815
ACAN	0.136513	0.999868	-0.303179
XCR1	0.136579	0.999868	-0.41056
BAI1	0.136642	0.999868	0.468099
HIPK1	0.136729	0.999868	0.634037
POP4	0.136838	0.999868	-0.377376
HSPA5	0.136881	0.999868	0.596385
CYP2B6	0.137016	0.999868	0.359039
DYNC1LI2	0.137047	0.999868	-0.366073
CRYBB2P1	0.137059	0.999868	-0.80004
APBB3 /// MIR6831	0.137667	0.999868	-0.382111
SLC24A2	0.137914	0.999868	-0.537581
USP39	0.137931	0.999868	0.795148
P2RX7	0.138043	0.999868	0.380321
COL5A1	0.138211	0.999868	-0.289271
CNTLN	0.138414	0.999868	0.481138
CACNA2D2	0.138661	0.999868	-0.54785
IFNA2	0.138695	0.999868	0.337624
LY75	0.138757	0.999868	0.600433
SEC16A	0.138836	0.999868	0.435926
CCNI	0.138874	0.999868	0.414794
LDLRAD4	0.138941	0.999868	0.284047
ADAMTSL4	0.138983	0.999868	0.391625
ARL4C	0.139002	0.999868	-0.374159
SMTN	0.139366	0.999868	0.408674
CRHR1	0.139431	0.999868	0.356022
DHRS4 /// DHRS4L2	0.139513	0.999868	-0.375112
AGTPBP1	0.13955	0.999868	0.570995
CTDNEP1	0.139658	0.999868	0.451068
PAXBP1	0.139838	0.999868	-0.311464
LOC101928457	0.139959	0.999868	0.310741
DENND4A	0.140027	0.999868	0.31999
MTDH	0.140066	0.999868	0.271642
TYMS	0.140155	0.999868	0.35841
PFKFB2	0.140194	0.999868	0.333796
DES /// SUPT20H	0.140265	0.999868	-0.21702
MICAL2	0.140397	0.999868	0.483019
PAK7	0.140406	0.999868	0.345814
IRX4	0.140502	0.999868	0.352664
ZNRF4	0.140619	0.999868	-0.564961
VSIG4	0.140904	0.999868	0.458789
GLTSCR1L	0.140988	0.999868	0.55859
CIRBP	0.14102	0.999868	-0.399618
L2HGDH	0.141057	0.999868	0.281679
AHCY	0.141232	0.999868	-0.308975
ZIC1	0.14128	0.999868	-0.218007
MSC	0.141283	0.999868	0.419948
MMACHC	0.141546	0.999868	-0.414221
PDGFD	0.141551	0.999868	0.310246
PRODH2	0.141599	0.999868	0.727456
RAB11FIP3	0.14168	0.999868	-0.364281
RPL21 /// RPL21P28 /// SNORA27 /// SNORD102	0.1417	0.999868	0.345416
TRIM52	0.141711	0.999868	0.485649
HLA-DRA	0.141858	0.999868	-0.414135
TRPS1	0.141863	0.999868	0.472146
PRPF31	0.142365	0.999868	-0.269702
SLCO2B1	0.14244	0.999868	0.215645
ABCG2	0.142442	0.999868	0.347842
IFIT5	0.142503	0.999868	-0.665674
TAF1D	0.142637	0.999868	-0.343012
PRR14	0.142637	0.999868	-0.573705
IFITM2	0.142644	0.999868	-0.477149
PRELP	0.142853	0.999868	0.425744
LOC441155 /// ZC3H11A	0.142907	0.999868	0.334168
FAM215A	0.143094	0.999868	0.529995
CASP10	0.143099	0.999868	-0.315715
EMD	0.143121	0.999868	0.579134
MLLT4-AS1	0.143209	0.999868	-0.368291
C5orf45	0.143286	0.999868	0.573736
PLCH2	0.143573	0.999868	-0.279487
SP2	0.143651	0.999868	0.310527
GBA /// GBAP1	0.143926	0.999868	-0.632134
JUNB	0.143946	0.999868	-0.484025
MYL5	0.144076	0.999868	0.490211
SYNPO2L	0.144096	0.999868	-0.270307
RNPEP	0.144137	0.999868	-0.420623
GCNT2	0.144344	0.999868	-0.301
IGLVIVOR22-1 /// IGLVIVOR22-1	0.144345	0.999868	-0.387977
YY1	0.144465	0.999868	0.260121
RBP3	0.144481	0.999868	-0.454363
ZNF335	0.144732	0.999868	-0.230516
CHD9	0.144776	0.999868	0.340414
OTUB2	0.14478	0.999868	0.410576
MYO15B	0.144794	0.999868	-0.347356
SRSF3	0.144866	0.999868	-0.306197
MMP12	0.145022	0.999868	0.406503
FAM162A	0.145112	0.999868	0.38372
NECAP2	0.14513	0.999868	-0.32144
KPNA1	0.145192	0.999868	0.334101
RRP8	0.14525	0.999868	-0.393362
SEC14L4	0.145256	0.999868	-0.462262
FEZ2	0.145342	0.999868	-0.267475
IFT27	0.145474	0.999868	-0.269625
TNIP1	0.145613	0.999868	-0.40318
ASGR1	0.145628	0.999868	-0.348426
PGGT1B	0.145824	0.999868	-0.339258
GSK3B	0.146112	0.999868	0.521226
CD46	0.146131	0.999868	-0.529403
DYNLL1	0.146192	0.999868	0.557124
MEG3	0.146196	0.999868	-0.281133
NMT1	0.146387	0.999868	-0.313366
RALB	0.146588	0.999868	-0.451505
UFC1	0.146687	0.999868	-0.452793
FPR1	0.146727	0.999868	0.380218
DPAGT1	0.146745	0.999868	0.311461
ZNF74	0.146836	0.999868	0.370479
TNPO1	0.146863	0.999868	0.377804
FRYL	0.146873	0.999868	0.258656
LOC441601	0.146878	0.999868	-0.463334
PGLYRP1	0.146983	0.999868	0.910831
CTR9	0.146985	0.999868	0.439667
OR6A2	0.147103	0.999868	-0.524549
KDM7A	0.147113	0.999868	-0.672668
ZNF391	0.147281	0.999868	0.448089
CYP2J2	0.147294	0.999868	0.38829
ROS1	0.147324	0.999868	-0.332121
SLC9A8	0.147333	0.999868	-0.576634
EFNA5	0.147361	0.999868	-0.371381
Y16709	0.147431	0.999868	0.746915
NFYA	0.147471	0.999868	-0.232097
SGPP1	0.147527	0.999868	0.349983
MAP4K5	0.147533	0.999868	0.294611
FHOD1	0.147577	0.999868	-0.378813
ITGB7	0.147613	0.999868	-0.545403
ACBD4	0.147701	0.999868	0.430374
EPS15	0.147782	0.999868	0.372797
CACNB3	0.147811	0.999868	0.279013
IK /// TMCO6	0.147864	0.999868	0.546456
PSD4	0.147903	0.999868	-0.598642
CCL24	0.14799	0.999868	0.41299
MBP	0.14803	0.999868	0.413422
MIR6743 /// RIC8A	0.148114	0.999868	-0.631943
CNOT1	0.148122	0.999868	0.255154
RAD54B	0.148135	0.999868	0.437882
SDC4	0.148184	0.999868	0.337832
CLCN3	0.148327	0.999868	0.401891
FBXO22	0.148376	0.999868	-0.329944
TMEM19	0.148608	0.999868	-0.311668
ACP6	0.148617	0.999868	-0.551001
DDX3Y	0.148622	0.999868	0.821082
TRRAP	0.148622	0.999868	0.317082
MR1	0.148712	0.999868	-0.237074
CALB1	0.148771	0.999868	0.268586
YIPF4	0.148871	0.999868	0.255172
DOK4	0.148907	0.999868	0.273981
PFDN4	0.148909	0.999868	0.364772
FDPSP5 /// FDPSP5	0.148991	0.999868	0.392606
TRANK1	0.149011	0.999868	-0.434525
BLMH	0.14904	0.999868	0.412992
MTMR9	0.149126	0.999868	-0.311383
RFPL1S /// RFPL3S	0.149308	0.999868	0.338628
RPS29	0.14936	0.999868	-0.451452
AIPL1	0.149379	0.999868	-0.499414
LHCGR	0.149435	0.999868	0.350945
SLC2A1	0.149753	0.999868	0.703863
RPL26L1	0.149817	0.999868	0.423626
HAUS4 /// MIR4707	0.149823	0.999868	-0.355737
BCL2L14	0.149909	0.999868	-0.591131
MAN1A1	0.150033	0.999868	0.477795
LTA	0.150093	0.999868	-0.243411
AMOTL2	0.150138	0.999868	0.333783
MRPL15	0.150321	0.999868	-0.352265
PCDHGA10 /// PCDHGA11 /// PCDHGA12 /// PCDHGA3 /// PCDHGA5 /// PCDHGA6 /// PCDHGC3	0.150329	0.999868	0.252639
VIPR1	0.150371	0.999868	-0.725391
ATP5I	0.150377	0.999868	-0.480124
KAT6B	0.150381	0.999868	0.342183
ARG2	0.15039	0.999868	0.283473
SEPW1	0.150483	0.999868	-0.633664
ANGPTL3	0.150764	0.999868	-0.495612
DGKA	0.15083	0.999868	-0.292788
VPS26A	0.150988	0.999868	0.393538
TXNRD1	0.151065	0.999868	0.271566
UGGT1	0.151092	0.999868	0.286498
NFE2L2	0.151098	0.999868	0.538437
PMFBP1	0.151213	0.999868	-0.456633
BTN2A3P	0.151332	0.999868	-0.807332
BABAM1	0.151411	0.999868	-0.285719
SAT1	0.151517	0.999868	-0.427078
CLTA	0.151552	0.999868	0.289486
LOC150776 /// SMPD4	0.151559	0.999868	-0.390411
MCFD2P1 /// MCFD2P1	0.1516	0.999868	-0.254234
LOC101929857 /// SLX1A-SULT1A3 /// SLX1B-SULT1A4 /// SULT1A3 /// SULT1A4	0.15162	0.999868	-0.433316
ATR	0.151627	0.999868	0.399831
LAMTOR3	0.151641	0.999868	-0.490295
HSPH1	0.151641	0.999868	0.747379
TAP1	0.151722	0.999868	-0.886436
MON1B	0.151852	0.999868	0.445228
GPR50	0.15196	0.999868	-0.357513
CHTOP	0.152014	0.999868	-0.385465
ADAM18	0.152022	0.999868	0.455596
RPL8	0.152067	0.999868	-0.328394
B3GNT1	0.152164	0.999868	-0.399135
COL8A2	0.15217	0.999868	-0.329763
RAB5B	0.152212	0.999868	0.381824
L1TD1	0.152309	0.999868	0.518941
SLC22A5	0.152401	0.999868	-0.324621
TASP1	0.152581	0.999868	-0.274518
SSR1	0.152693	0.999868	0.298067
SSBP3	0.152708	0.999868	0.579728
ERP29	0.152717	0.999868	-0.46379
RNLS	0.15286	0.999868	-0.340252
RPL36AL	0.153111	0.999868	-0.53267
CNTNAP3P2	0.153131	0.999868	0.439112
PRO1483	0.153143	0.999868	0.252029
PTK2	0.153207	0.999868	0.314097
CCDC121	0.153236	0.999868	0.33133
AK4 /// LOC100507855	0.15328	0.999868	0.29841
CITED2	0.153424	0.999868	0.865127
GPR65	0.153529	0.999868	-0.507103
C11orf48 /// LOC102288414	0.153739	0.999868	0.578523
KMT2A /// LOC101929115	0.15377	0.999868	-0.412533
PTGER1	0.153954	0.999868	0.228203
RPH3A	0.154123	0.999868	0.661776
NAA15	0.154378	0.999868	0.605651
IL6R	0.154401	0.999868	0.567531
PLCG2	0.154413	0.999868	0.364641
RGS13	0.154508	0.999868	0.292951
SH3BP5	0.154567	0.999868	0.305237
GRN	0.154734	0.999868	0.341468
PTH2R	0.154833	0.999868	-0.486604
TMEM147	0.154975	0.999868	-0.464015
RRM2	0.154978	0.999868	0.655593
GJD2	0.155096	0.999868	-0.471023
RPL18A /// SNORA68	0.155202	0.999868	-0.43936
SRPR	0.155472	0.999868	0.505182
PTER	0.155613	0.999868	0.381713
NEUROD2	0.155644	0.999868	-0.589345
RNF138	0.155792	0.999868	-0.445678
SCG2	0.155924	0.999868	0.309673
ARMC7	0.156077	0.999868	0.614369
OR7E19P	0.156109	0.999868	-0.247279
POLR2J /// POLR2J2 /// POLR2J3 /// POLR2J4 /// UPK3BL	0.156127	0.999868	-0.483218
NUP93	0.15615	0.999868	0.48009
HOXA10	0.156183	0.999868	0.389124
KCTD2	0.156281	0.999868	-0.243985
C1R	0.156338	0.999868	-0.60165
KCNJ4	0.156452	0.999868	-0.278927
ADRM1	0.156504	0.999868	-0.449209
HNF1B	0.156514	0.999868	0.533512
FER1L4	0.156642	0.999868	0.30617
FAT2	0.156666	0.999868	-0.413955
ASXL2	0.156989	0.999868	0.4431
BOP1 /// MIR7112	0.15721	0.999868	-0.265477
MAP2K4	0.157277	0.999868	0.341148
P2RY10	0.157289	0.999868	0.31057
RNF4	0.157389	0.999868	0.554791
DGKZ	0.157413	0.999868	-0.374776
TRAPPC2 /// TRAPPC2P1	0.157654	0.999868	-0.329254
SENP5	0.157723	0.999868	-0.251565
ZNF276	0.157745	0.999868	-0.501504
VAMP3	0.157834	0.999868	-0.283041
OLFM4	0.158087	0.999868	1.30571
TERF2IP	0.158135	0.999868	0.509605
ATP6V0B	0.158143	0.999868	-0.383113
S100A8	0.158155	0.999868	0.536465
RPE	0.158182	0.999868	0.372286
AGA	0.158186	0.999868	0.217289
SLC6A6	0.158333	0.999868	-0.278521
KLK6	0.15836	0.999868	-0.422834
KDM4A	0.158461	0.999868	-0.546176
CD248	0.158495	0.999868	-0.434548
DRD1	0.15857	0.999868	0.400446
EPB41L1	0.158724	0.999868	-0.385895
GOLGB1	0.158732	0.999868	0.341704
RP11-116O18.1	0.158765	0.999868	0.263185
RP11-82L18.2	0.158767	0.999868	-0.730064
TERF1	0.158768	0.999868	0.337045
ATP2C1	0.15877	0.999868	0.33136
C10orf10	0.158917	0.999868	0.644704
ACYP1	0.158922	0.999868	-0.446817
ANXA2P3	0.15897	0.999868	0.408315
RUFY2	0.159024	0.999868	-0.598702
GNRHR	0.159121	0.999868	0.2305
RHBDD3	0.159135	0.999868	-0.352156
ADAP1	0.159362	0.999868	-0.38721
C5orf66	0.159464	0.999868	-0.455584
TOP1	0.159488	0.999868	0.482092
MYBPH	0.159545	0.999868	-0.479412
PAK2	0.159598	0.999868	0.228836
CEACAM3	0.159612	0.999868	-0.361257
NABP2	0.159618	0.999868	-0.334736
DES	0.159674	0.999868	0.295951
SRRM2	0.159683	0.999868	0.34739
CCDC85C	0.159718	0.999868	-0.589893
PLA2G12A	0.159719	0.999868	0.378826
ZSCAN5A	0.159753	0.999868	-0.372907
DDX5 /// MIR3064 /// MIR5047	0.159779	0.999868	-0.421615
HAPLN2	0.159917	0.999868	0.728499
PDCD11	0.159949	0.999868	-0.28243
TPI1	0.159985	0.999868	0.359073
NOX5	0.160209	0.999868	-0.500152
DCAF15	0.160211	0.999868	-0.295593
MAP3K5	0.160218	0.999868	0.281584
SAP130	0.160219	0.999868	-0.288731
SMARCC1	0.160368	0.999868	0.342378
THRB	0.160429	0.999868	-0.574225
GTF2A1L /// STON1-GTF2A1L	0.160562	0.999868	0.208333
LPAR1	0.160584	0.999868	-0.316973
CTC-425F1.4	0.160756	0.999868	0.662325
F5	0.16083	0.999868	0.384798
CCSER2	0.161188	0.999868	0.494162
RAB11FIP2	0.161206	0.999868	0.246397
CXCL9	0.161261	0.999868	-0.405937
CXCR4	0.161273	0.999868	-0.429933
PIH1D1	0.161471	0.999868	0.310743
MAGEA11	0.161647	0.999868	-0.29219
EGFL6	0.161666	0.999868	-0.313958
SLC10A3	0.161809	0.999868	0.718574
WIPF1	0.161857	0.999868	0.28268
CEP70	0.161919	0.999868	0.441769
ADORA2A /// SPECC1L-ADORA2A	0.162311	0.999868	-0.492168
MTRF1L	0.162413	0.999868	0.30148
LRP8	0.162566	0.999868	0.374923
GYG2	0.162618	0.999868	-0.296417
EFCAB2	0.162646	0.999868	-0.303899
RBPJ	0.162815	0.999868	0.29907
LILRA5	0.16293	0.999868	-0.447536
GFM1	0.162931	0.999868	-0.470386
DGAT1	0.163239	0.999868	-0.538058
TUBG1	0.163422	0.999868	0.403897
MYL6	0.163434	0.999868	-0.386817
TKTL1	0.163461	0.999868	0.492818
TNIP2	0.163542	0.999868	-0.241391
CSTA	0.163671	0.999868	-0.616104
LRIG1	0.163701	0.999868	0.628133
TMEM123	0.163724	0.999868	-0.489674
WNT11	0.16377	0.999868	-0.358366
HIST1H2BJ	0.163771	0.999868	-0.309394
SIGLEC9	0.163829	0.999868	-0.713491
P2RX5	0.164017	0.999868	-0.700028
BV03S1J2.2 /// IL23A /// TCRB /// TCRVB /// TRBC2 /// TRBC2 /// TRBJ2-7 /// TRBJ2-7 /// TRBV19	0.164102	0.999868	-0.501445
ABLIM1	0.16422	0.999868	0.518614
KCNE4	0.164391	0.999868	-0.362259
NKIRAS2	0.164463	0.999868	-0.353899
NACA2	0.164493	0.999868	-0.30016
PES1	0.164528	0.999868	-0.506191
KCNJ15	0.164564	0.999868	-0.437953
GCAT	0.164786	0.999868	-0.262195
FOXP3	0.164889	0.999868	0.25818
TMSB10	0.164945	0.999868	-0.403661
CD22	0.164977	0.999868	0.287632
ENO3	0.164978	0.999868	0.374141
AQP4	0.164982	0.999868	-0.187404
TPSAB1	0.165081	0.999868	0.204059
HOMER2	0.165147	0.999868	-0.604574
MTHFD1	0.165414	0.999868	0.313564
ITGA2B	0.165515	0.999868	0.510306
SREBF2	0.16556	0.999868	-0.323105
NEIL3	0.165573	0.999868	0.383356
TRMT2B	0.165671	0.999868	-0.366358
PSG11	0.165768	0.999868	-0.575492
MS4A1	0.165897	0.999868	0.535374
AKT1	0.165965	0.999868	-0.470988
[truncated: 11,516 more rows]
