# Supplementary material for: Comparative transcriptomic analysis reveals translationally relevant processes in mouse models of malaria
Source: eLife. 2022 Jan 10;11:e70763. doi: 10.7554/eLife.70763 (PMC8747512; doi:10.7554/eLife.70763)
Supplement: Supplementary file 8. [file elife-70763-supp8.xlsx]

## Sheet: Key
Supplementary File 8 Human Mouse Orthologs
Description: The human-mouse orthologs extracted from ensembl
Gene stable ID	Human gene ID
Transcript stable ID	Human transcript ID
Gene name	Human gene Name
Mouse gene stable ID	mouse gene ID
Mouse gene name	mouse gene Name
Mouse homology type	mouse homology Type

## Sheet: Human_Mouse_Orthologs
Gene stable ID	Transcript stable ID	Gene name	Mouse gene stable ID	Mouse gene name	Mouse homology type
ENSG00000198888	ENST00000361390	MT-ND1	ENSMUSG00000064341	mt-Nd1	ortholog_one2one
ENSG00000198763	ENST00000361453	MT-ND2	ENSMUSG00000064345	mt-Nd2	ortholog_one2one
ENSG00000198804	ENST00000361624	MT-CO1	ENSMUSG00000064351	mt-Co1	ortholog_one2one
ENSG00000198712	ENST00000361739	MT-CO2	ENSMUSG00000064354	mt-Co2	ortholog_one2one
ENSG00000228253	ENST00000361851	MT-ATP8	ENSMUSG00000064356	mt-Atp8	ortholog_one2one
ENSG00000198899	ENST00000361899	MT-ATP6	ENSMUSG00000064357	mt-Atp6	ortholog_one2one
ENSG00000198938	ENST00000362079	MT-CO3	ENSMUSG00000064358	mt-Co3	ortholog_one2one
ENSG00000198840	ENST00000361227	MT-ND3	ENSMUSG00000064360	mt-Nd3	ortholog_one2one
ENSG00000212907	ENST00000361335	MT-ND4L	ENSMUSG00000065947	mt-Nd4l	ortholog_one2one
ENSG00000198886	ENST00000361381	MT-ND4	ENSMUSG00000064363	mt-Nd4	ortholog_one2one
ENSG00000198786	ENST00000361567	MT-ND5	ENSMUSG00000064367	mt-Nd5	ortholog_one2one
ENSG00000198695	ENST00000361681	MT-ND6	ENSMUSG00000064368	mt-Nd6	ortholog_one2one
ENSG00000198727	ENST00000361789	MT-CYB	ENSMUSG00000064370	mt-Cytb	ortholog_one2one
ENSG00000088766	ENST00000378863	CRLS1	ENSMUSG00000027357	Crls1	ortholog_one2one
ENSG00000088766	ENST00000378868	CRLS1	ENSMUSG00000027357	Crls1	ortholog_one2one
ENSG00000088766	ENST00000609154	CRLS1	ENSMUSG00000027357	Crls1	ortholog_one2one
ENSG00000088766	ENST00000489345	CRLS1	ENSMUSG00000027357	Crls1	ortholog_one2one
ENSG00000088766	ENST00000464921	CRLS1	ENSMUSG00000027357	Crls1	ortholog_one2one
ENSG00000088766	ENST00000478846	CRLS1	ENSMUSG00000027357	Crls1	ortholog_one2one
ENSG00000088766	ENST00000452938	CRLS1	ENSMUSG00000027357	Crls1	ortholog_one2one
ENSG00000086475	ENST00000327347	SEPHS1	ENSMUSG00000026662	Sephs1	ortholog_one2one
ENSG00000086475	ENST00000378614	SEPHS1	ENSMUSG00000026662	Sephs1	ortholog_one2one
ENSG00000086475	ENST00000413411	SEPHS1	ENSMUSG00000026662	Sephs1	ortholog_one2one
ENSG00000086475	ENST00000425947	SEPHS1	ENSMUSG00000026662	Sephs1	ortholog_one2one
ENSG00000086475	ENST00000494329	SEPHS1	ENSMUSG00000026662	Sephs1	ortholog_one2one
ENSG00000086475	ENST00000545675	SEPHS1	ENSMUSG00000026662	Sephs1	ortholog_one2one
ENSG00000174327	ENST00000308027	SLC16A13	ENSMUSG00000044367	Slc16a13	ortholog_one2one
ENSG00000174327	ENST00000575844	SLC16A13	ENSMUSG00000044367	Slc16a13	ortholog_one2one
ENSG00000173597	ENST00000310613	SULT1B1	ENSMUSG00000029269	Sult1b1	ortholog_one2one
ENSG00000173597	ENST00000510821	SULT1B1	ENSMUSG00000029269	Sult1b1	ortholog_one2one
ENSG00000173597	ENST00000512870	SULT1B1	ENSMUSG00000029269	Sult1b1	ortholog_one2one
ENSG00000133818	ENST00000414023	RRAS2	ENSMUSG00000055723	Rras2	ortholog_one2one
ENSG00000133818	ENST00000529237	RRAS2	ENSMUSG00000055723	Rras2	ortholog_one2one
ENSG00000133818	ENST00000256196	RRAS2	ENSMUSG00000055723	Rras2	ortholog_one2one
ENSG00000133818	ENST00000534746	RRAS2	ENSMUSG00000055723	Rras2	ortholog_one2one
ENSG00000133818	ENST00000526063	RRAS2	ENSMUSG00000055723	Rras2	ortholog_one2one
ENSG00000133818	ENST00000532814	RRAS2	ENSMUSG00000055723	Rras2	ortholog_one2one
ENSG00000133818	ENST00000531807	RRAS2	ENSMUSG00000055723	Rras2	ortholog_one2one
ENSG00000133818	ENST00000532950	RRAS2	ENSMUSG00000055723	Rras2	ortholog_one2one
ENSG00000133818	ENST00000531421	RRAS2	ENSMUSG00000055723	Rras2	ortholog_one2one
ENSG00000133818	ENST00000526717	RRAS2	ENSMUSG00000055723	Rras2	ortholog_one2one
ENSG00000133818	ENST00000537760	RRAS2	ENSMUSG00000055723	Rras2	ortholog_one2one
ENSG00000010319	ENST00000231721	SEMA3G	ENSMUSG00000021904	Sema3g	ortholog_one2one
ENSG00000010319	ENST00000465657	SEMA3G	ENSMUSG00000021904	Sema3g	ortholog_one2one
ENSG00000010319	ENST00000475739	SEMA3G	ENSMUSG00000021904	Sema3g	ortholog_one2one
ENSG00000188338	ENST00000610458	SLC38A3	ENSMUSG00000010064	Slc38a3	ortholog_one2one
ENSG00000188338	ENST00000614032	SLC38A3	ENSMUSG00000010064	Slc38a3	ortholog_one2one
ENSG00000188338	ENST00000621714	SLC38A3	ENSMUSG00000010064	Slc38a3	ortholog_one2one
ENSG00000188338	ENST00000620404	SLC38A3	ENSMUSG00000010064	Slc38a3	ortholog_one2one
ENSG00000188338	ENST00000445096	SLC38A3	ENSMUSG00000010064	Slc38a3	ortholog_one2one
ENSG00000188338	ENST00000621456	SLC38A3	ENSMUSG00000010064	Slc38a3	ortholog_one2one
ENSG00000188338	ENST00000439524	SLC38A3	ENSMUSG00000010064	Slc38a3	ortholog_one2one
ENSG00000188338	ENST00000417851	SLC38A3	ENSMUSG00000010064	Slc38a3	ortholog_one2one
ENSG00000188338	ENST00000417121	SLC38A3	ENSMUSG00000010064	Slc38a3	ortholog_one2one
ENSG00000115386	ENST00000488524	REG1A	ENSMUSG00000059654	Reg1	ortholog_one2many
ENSG00000115386	ENST00000233735	REG1A	ENSMUSG00000059654	Reg1	ortholog_one2many
ENSG00000115386	ENST00000461579	REG1A	ENSMUSG00000059654	Reg1	ortholog_one2many
ENSG00000115386	ENST00000485184	REG1A	ENSMUSG00000059654	Reg1	ortholog_one2many
ENSG00000115386	ENST00000488524	REG1A	ENSMUSG00000023140	Reg2	ortholog_one2many
ENSG00000115386	ENST00000233735	REG1A	ENSMUSG00000023140	Reg2	ortholog_one2many
ENSG00000115386	ENST00000461579	REG1A	ENSMUSG00000023140	Reg2	ortholog_one2many
ENSG00000115386	ENST00000485184	REG1A	ENSMUSG00000023140	Reg2	ortholog_one2many
ENSG00000185972	ENST00000335119	CCIN	ENSMUSG00000070999	Ccin	ortholog_one2one
ENSG00000134571	ENST00000545968	MYBPC3	ENSMUSG00000002100	Mybpc3	ortholog_one2one
ENSG00000134571	ENST00000544791	MYBPC3	ENSMUSG00000002100	Mybpc3	ortholog_one2one
ENSG00000134571	ENST00000256993	MYBPC3	ENSMUSG00000002100	Mybpc3	ortholog_one2one
ENSG00000134571	ENST00000399249	MYBPC3	ENSMUSG00000002100	Mybpc3	ortholog_one2one
ENSG00000205022	ENST00000419291	PABPN1L	ENSMUSG00000069867	Pabpn1l	ortholog_one2one
ENSG00000205022	ENST00000411789	PABPN1L	ENSMUSG00000069867	Pabpn1l	ortholog_one2one
ENSG00000205022	ENST00000547152	PABPN1L	ENSMUSG00000069867	Pabpn1l	ortholog_one2one
ENSG00000174564	ENST00000484501	IL20RB	ENSMUSG00000044244	Il20rb	ortholog_one2one
ENSG00000174564	ENST00000329582	IL20RB	ENSMUSG00000044244	Il20rb	ortholog_one2one
ENSG00000174564	ENST00000469964	IL20RB	ENSMUSG00000044244	Il20rb	ortholog_one2one
ENSG00000174564	ENST00000491483	IL20RB	ENSMUSG00000044244	Il20rb	ortholog_one2one
ENSG00000174564	ENST00000475972	IL20RB	ENSMUSG00000044244	Il20rb	ortholog_one2one
ENSG00000225663	ENST00000455127	MCRIP1	ENSMUSG00000061111	Mcrip1	ortholog_one2one
ENSG00000225663	ENST00000576730	MCRIP1	ENSMUSG00000061111	Mcrip1	ortholog_one2one
ENSG00000225663	ENST00000572645	MCRIP1	ENSMUSG00000061111	Mcrip1	ortholog_one2one
ENSG00000225663	ENST00000538396	MCRIP1	ENSMUSG00000061111	Mcrip1	ortholog_one2one
ENSG00000225663	ENST00000573478	MCRIP1	ENSMUSG00000061111	Mcrip1	ortholog_one2one
ENSG00000225663	ENST00000574190	MCRIP1	ENSMUSG00000061111	Mcrip1	ortholog_one2one
ENSG00000225663	ENST00000570507	MCRIP1	ENSMUSG00000061111	Mcrip1	ortholog_one2one
ENSG00000225663	ENST00000575090	MCRIP1	ENSMUSG00000061111	Mcrip1	ortholog_one2one
ENSG00000225663	ENST00000576679	MCRIP1	ENSMUSG00000061111	Mcrip1	ortholog_one2one
ENSG00000225663	ENST00000576431	MCRIP1	ENSMUSG00000061111	Mcrip1	ortholog_one2one
ENSG00000225663	ENST00000575061	MCRIP1	ENSMUSG00000061111	Mcrip1	ortholog_one2one
ENSG00000225663	ENST00000457257	MCRIP1	ENSMUSG00000061111	Mcrip1	ortholog_one2one
ENSG00000142627	ENST00000358432	EPHA2	ENSMUSG00000006445	Epha2	ortholog_one2one
ENSG00000142627	ENST00000462805	EPHA2	ENSMUSG00000006445	Epha2	ortholog_one2one
ENSG00000142627	ENST00000480202	EPHA2	ENSMUSG00000006445	Epha2	ortholog_one2one
ENSG00000142627	ENST00000461614	EPHA2	ENSMUSG00000006445	Epha2	ortholog_one2one
ENSG00000177125	ENST00000319119	ZBTB34	ENSMUSG00000068966	Zbtb34	ortholog_one2one
ENSG00000177125	ENST00000373452	ZBTB34	ENSMUSG00000068966	Zbtb34	ortholog_one2one
ENSG00000198373	ENST00000359154	WWP2	ENSMUSG00000031930	Wwp2	ortholog_one2one
ENSG00000198373	ENST00000561780	WWP2	ENSMUSG00000031930	Wwp2	ortholog_one2one
ENSG00000198373	ENST00000569620	WWP2	ENSMUSG00000031930	Wwp2	ortholog_one2one
ENSG00000198373	ENST00000568845	WWP2	ENSMUSG00000031930	Wwp2	ortholog_one2one
ENSG00000198373	ENST00000563659	WWP2	ENSMUSG00000031930	Wwp2	ortholog_one2one
ENSG00000198373	ENST00000569658	WWP2	ENSMUSG00000031930	Wwp2	ortholog_one2one
ENSG00000198373	ENST00000569174	WWP2	ENSMUSG00000031930	Wwp2	ortholog_one2one
ENSG00000198373	ENST00000544162	WWP2	ENSMUSG00000031930	Wwp2	ortholog_one2one
ENSG00000198373	ENST00000567986	WWP2	ENSMUSG00000031930	Wwp2	ortholog_one2one
ENSG00000198373	ENST00000563618	WWP2	ENSMUSG00000031930	Wwp2	ortholog_one2one
ENSG00000198373	ENST00000570104	WWP2	ENSMUSG00000031930	Wwp2	ortholog_one2one
ENSG00000198373	ENST00000569297	WWP2	ENSMUSG00000031930	Wwp2	ortholog_one2one
ENSG00000198373	ENST00000567579	WWP2	ENSMUSG00000031930	Wwp2	ortholog_one2one
ENSG00000198373	ENST00000566463	WWP2	ENSMUSG00000031930	Wwp2	ortholog_one2one
ENSG00000198373	ENST00000568684	WWP2	ENSMUSG00000031930	Wwp2	ortholog_one2one
ENSG00000198373	ENST00000568185	WWP2	ENSMUSG00000031930	Wwp2	ortholog_one2one
ENSG00000198373	ENST00000568818	WWP2	ENSMUSG00000031930	Wwp2	ortholog_one2one
ENSG00000198373	ENST00000567161	WWP2	ENSMUSG00000031930	Wwp2	ortholog_one2one
ENSG00000198373	ENST00000567303	WWP2	ENSMUSG00000031930	Wwp2	ortholog_one2one
ENSG00000198373	ENST00000356003	WWP2	ENSMUSG00000031930	Wwp2	ortholog_one2one
ENSG00000164107	ENST00000503024	HAND2	ENSMUSG00000038193	Hand2	ortholog_one2one
ENSG00000164107	ENST00000359562	HAND2	ENSMUSG00000038193	Hand2	ortholog_one2one
ENSG00000164107	ENST00000505300	HAND2	ENSMUSG00000038193	Hand2	ortholog_one2one
ENSG00000164107	ENST00000621866	HAND2	ENSMUSG00000038193	Hand2	ortholog_one2one
ENSG00000144401	ENST00000432416	METTL21A	ENSMUSG00000025956	Mettl21a	ortholog_one2one
ENSG00000144401	ENST00000458426	METTL21A	ENSMUSG00000025956	Mettl21a	ortholog_one2one
ENSG00000144401	ENST00000425132	METTL21A	ENSMUSG00000025956	Mettl21a	ortholog_one2one
ENSG00000144401	ENST00000477919	METTL21A	ENSMUSG00000025956	Mettl21a	ortholog_one2one
ENSG00000144401	ENST00000448007	METTL21A	ENSMUSG00000025956	Mettl21a	ortholog_one2one
ENSG00000144401	ENST00000272839	METTL21A	ENSMUSG00000025956	Mettl21a	ortholog_one2one
ENSG00000144401	ENST00000448823	METTL21A	ENSMUSG00000025956	Mettl21a	ortholog_one2one
ENSG00000144401	ENST00000406927	METTL21A	ENSMUSG00000025956	Mettl21a	ortholog_one2one
ENSG00000144401	ENST00000426075	METTL21A	ENSMUSG00000025956	Mettl21a	ortholog_one2one
ENSG00000144401	ENST00000442521	METTL21A	ENSMUSG00000025956	Mettl21a	ortholog_one2one
ENSG00000144401	ENST00000461419	METTL21A	ENSMUSG00000025956	Mettl21a	ortholog_one2one
ENSG00000144401	ENST00000471128	METTL21A	ENSMUSG00000025956	Mettl21a	ortholog_one2one
ENSG00000144401	ENST00000411432	METTL21A	ENSMUSG00000025956	Mettl21a	ortholog_one2one
ENSG00000277149	ENST00000612372	TYW1B	ENSMUSG00000056310	Tyw1	ortholog_one2many
ENSG00000277149	ENST00000620995	TYW1B	ENSMUSG00000056310	Tyw1	ortholog_one2many
ENSG00000277149	ENST00000610600	TYW1B	ENSMUSG00000056310	Tyw1	ortholog_one2many
ENSG00000256525	ENST00000539111	POLG2	ENSMUSG00000020718	Polg2	ortholog_one2one
ENSG00000256525	ENST00000581355	POLG2	ENSMUSG00000020718	Polg2	ortholog_one2one
ENSG00000256525	ENST00000582501	POLG2	ENSMUSG00000020718	Polg2	ortholog_one2one
ENSG00000256525	ENST00000577506	POLG2	ENSMUSG00000020718	Polg2	ortholog_one2one
ENSG00000256525	ENST00000580490	POLG2	ENSMUSG00000020718	Polg2	ortholog_one2one
ENSG00000256525	ENST00000585104	POLG2	ENSMUSG00000020718	Polg2	ortholog_one2one
ENSG00000256525	ENST00000585141	POLG2	ENSMUSG00000020718	Polg2	ortholog_one2one
ENSG00000256525	ENST00000578687	POLG2	ENSMUSG00000020718	Polg2	ortholog_one2one
ENSG00000256525	ENST00000580893	POLG2	ENSMUSG00000020718	Polg2	ortholog_one2one
ENSG00000256525	ENST00000578997	POLG2	ENSMUSG00000020718	Polg2	ortholog_one2one
ENSG00000276581	ENST00000437823	SPATA31A5	ENSMUSG00000056223	Spata31	ortholog_one2many
ENSG00000256043	ENST00000433477	CTSO	ENSMUSG00000028015	Ctso	ortholog_one2one
ENSG00000181915	ENST00000373783	ADO	ENSMUSG00000057134	Ado	ortholog_one2one
ENSG00000237515	ENST00000558583	SHISA9	ENSMUSG00000022494	Shisa9	ortholog_one2one
ENSG00000237515	ENST00000423335	SHISA9	ENSMUSG00000022494	Shisa9	ortholog_one2one
ENSG00000237515	ENST00000482916	SHISA9	ENSMUSG00000022494	Shisa9	ortholog_one2one
ENSG00000237515	ENST00000566106	SHISA9	ENSMUSG00000022494	Shisa9	ortholog_one2one
ENSG00000237515	ENST00000639941	SHISA9	ENSMUSG00000022494	Shisa9	ortholog_one2one
ENSG00000152292	ENST00000469800	SH2D6	ENSMUSG00000052631	Sh2d6	ortholog_one2one
ENSG00000152292	ENST00000389938	SH2D6	ENSMUSG00000052631	Sh2d6	ortholog_one2one
ENSG00000152292	ENST00000488657	SH2D6	ENSMUSG00000052631	Sh2d6	ortholog_one2one
ENSG00000152292	ENST00000474753	SH2D6	ENSMUSG00000052631	Sh2d6	ortholog_one2one
ENSG00000152292	ENST00000481395	SH2D6	ENSMUSG00000052631	Sh2d6	ortholog_one2one
ENSG00000152292	ENST00000481426	SH2D6	ENSMUSG00000052631	Sh2d6	ortholog_one2one
ENSG00000152292	ENST00000477170	SH2D6	ENSMUSG00000052631	Sh2d6	ortholog_one2one
ENSG00000152292	ENST00000340326	SH2D6	ENSMUSG00000052631	Sh2d6	ortholog_one2one
ENSG00000152292	ENST00000488219	SH2D6	ENSMUSG00000052631	Sh2d6	ortholog_one2one
ENSG00000188064	ENST00000339464	WNT7B	ENSMUSG00000022382	Wnt7b	ortholog_one2one
ENSG00000188064	ENST00000409496	WNT7B	ENSMUSG00000022382	Wnt7b	ortholog_one2one
ENSG00000188064	ENST00000410089	WNT7B	ENSMUSG00000022382	Wnt7b	ortholog_one2one
ENSG00000188064	ENST00000410058	WNT7B	ENSMUSG00000022382	Wnt7b	ortholog_one2one
ENSG00000188064	ENST00000428540	WNT7B	ENSMUSG00000022382	Wnt7b	ortholog_one2one
ENSG00000005073	ENST00000517402	HOXA11	ENSMUSG00000038210	Hoxa11	ortholog_one2one
ENSG00000005073	ENST00000006015	HOXA11	ENSMUSG00000038210	Hoxa11	ortholog_one2one
ENSG00000177669	ENST00000320542	MBOAT4	ENSMUSG00000071113	Mboat4	ortholog_one2one
ENSG00000148773	ENST00000368653	MKI67	ENSMUSG00000031004	Mki67	ortholog_one2one
ENSG00000148773	ENST00000368654	MKI67	ENSMUSG00000031004	Mki67	ortholog_one2one
ENSG00000148773	ENST00000464771	MKI67	ENSMUSG00000031004	Mki67	ortholog_one2one
ENSG00000148773	ENST00000484853	MKI67	ENSMUSG00000031004	Mki67	ortholog_one2one
ENSG00000148773	ENST00000478293	MKI67	ENSMUSG00000031004	Mki67	ortholog_one2one
ENSG00000034152	ENST00000395491	MAP2K3	ENSMUSG00000018932	Map2k3	ortholog_one2one
ENSG00000034152	ENST00000342679	MAP2K3	ENSMUSG00000018932	Map2k3	ortholog_one2one
ENSG00000034152	ENST00000534743	MAP2K3	ENSMUSG00000018932	Map2k3	ortholog_one2one
ENSG00000034152	ENST00000529517	MAP2K3	ENSMUSG00000018932	Map2k3	ortholog_one2one
ENSG00000034152	ENST00000483928	MAP2K3	ENSMUSG00000018932	Map2k3	ortholog_one2one
ENSG00000034152	ENST00000479129	MAP2K3	ENSMUSG00000018932	Map2k3	ortholog_one2one
ENSG00000034152	ENST00000583508	MAP2K3	ENSMUSG00000018932	Map2k3	ortholog_one2one
ENSG00000034152	ENST00000496046	MAP2K3	ENSMUSG00000018932	Map2k3	ortholog_one2one
ENSG00000034152	ENST00000526076	MAP2K3	ENSMUSG00000018932	Map2k3	ortholog_one2one
ENSG00000034152	ENST00000316920	MAP2K3	ENSMUSG00000018932	Map2k3	ortholog_one2one
ENSG00000034152	ENST00000477540	MAP2K3	ENSMUSG00000018932	Map2k3	ortholog_one2one
ENSG00000034152	ENST00000527123	MAP2K3	ENSMUSG00000018932	Map2k3	ortholog_one2one
ENSG00000034152	ENST00000613338	MAP2K3	ENSMUSG00000018932	Map2k3	ortholog_one2one
ENSG00000034152	ENST00000361818	MAP2K3	ENSMUSG00000018932	Map2k3	ortholog_one2one
ENSG00000034152	ENST00000627447	MAP2K3	ENSMUSG00000018932	Map2k3	ortholog_one2one
ENSG00000100292	ENST00000412893	HMOX1	ENSMUSG00000005413	Hmox1	ortholog_one2one
ENSG00000100292	ENST00000216117	HMOX1	ENSMUSG00000005413	Hmox1	ortholog_one2one
ENSG00000100292	ENST00000481190	HMOX1	ENSMUSG00000005413	Hmox1	ortholog_one2one
ENSG00000100292	ENST00000494998	HMOX1	ENSMUSG00000005413	Hmox1	ortholog_one2one
ENSG00000072163	ENST00000426981	LIMS2	ENSMUSG00000024395	Lims2	ortholog_one2one
ENSG00000072163	ENST00000469300	LIMS2	ENSMUSG00000024395	Lims2	ortholog_one2one
ENSG00000072163	ENST00000494613	LIMS2	ENSMUSG00000024395	Lims2	ortholog_one2one
ENSG00000072163	ENST00000409286	LIMS2	ENSMUSG00000024395	Lims2	ortholog_one2one
ENSG00000072163	ENST00000409754	LIMS2	ENSMUSG00000024395	Lims2	ortholog_one2one
ENSG00000072163	ENST00000476932	LIMS2	ENSMUSG00000024395	Lims2	ortholog_one2one
ENSG00000072163	ENST00000324938	LIMS2	ENSMUSG00000024395	Lims2	ortholog_one2one
ENSG00000072163	ENST00000484252	LIMS2	ENSMUSG00000024395	Lims2	ortholog_one2one
ENSG00000072163	ENST00000466410	LIMS2	ENSMUSG00000024395	Lims2	ortholog_one2one
ENSG00000072163	ENST00000409455	LIMS2	ENSMUSG00000024395	Lims2	ortholog_one2one
ENSG00000072163	ENST00000355119	LIMS2	ENSMUSG00000024395	Lims2	ortholog_one2one
ENSG00000072163	ENST00000409808	LIMS2	ENSMUSG00000024395	Lims2	ortholog_one2one
ENSG00000072163	ENST00000410011	LIMS2	ENSMUSG00000024395	Lims2	ortholog_one2one
ENSG00000072163	ENST00000410038	LIMS2	ENSMUSG00000024395	Lims2	ortholog_one2one
ENSG00000072163	ENST00000545738	LIMS2	ENSMUSG00000024395	Lims2	ortholog_one2one
ENSG00000072163	ENST00000413578	LIMS2	ENSMUSG00000024395	Lims2	ortholog_one2one
ENSG00000072163	ENST00000409254	LIMS2	ENSMUSG00000024395	Lims2	ortholog_one2one
ENSG00000072163	ENST00000582671	LIMS2	ENSMUSG00000024395	Lims2	ortholog_one2one
ENSG00000157617	ENST00000449165	C2CD2	ENSMUSG00000045975	C2cd2	ortholog_one2one
ENSG00000157617	ENST00000329623	C2CD2	ENSMUSG00000045975	C2cd2	ortholog_one2one
ENSG00000157617	ENST00000380486	C2CD2	ENSMUSG00000045975	C2cd2	ortholog_one2one
ENSG00000157617	ENST00000482186	C2CD2	ENSMUSG00000045975	C2cd2	ortholog_one2one
ENSG00000157617	ENST00000482084	C2CD2	ENSMUSG00000045975	C2cd2	ortholog_one2one
ENSG00000157617	ENST00000467074	C2CD2	ENSMUSG00000045975	C2cd2	ortholog_one2one
ENSG00000157617	ENST00000490479	C2CD2	ENSMUSG00000045975	C2cd2	ortholog_one2one
ENSG00000157617	ENST00000478372	C2CD2	ENSMUSG00000045975	C2cd2	ortholog_one2one
ENSG00000104671	ENST00000221114	DCTN6	ENSMUSG00000031516	Dctn6	ortholog_one2one
ENSG00000104671	ENST00000522141	DCTN6	ENSMUSG00000031516	Dctn6	ortholog_one2one
ENSG00000104671	ENST00000522540	DCTN6	ENSMUSG00000031516	Dctn6	ortholog_one2one
ENSG00000104671	ENST00000520829	DCTN6	ENSMUSG00000031516	Dctn6	ortholog_one2one
ENSG00000104671	ENST00000523666	DCTN6	ENSMUSG00000031516	Dctn6	ortholog_one2one
ENSG00000104671	ENST00000519830	DCTN6	ENSMUSG00000031516	Dctn6	ortholog_one2one
ENSG00000174326	ENST00000308009	SLC16A11	ENSMUSG00000040938	Slc16a11	ortholog_one2one
ENSG00000174326	ENST00000573338	SLC16A11	ENSMUSG00000040938	Slc16a11	ortholog_one2one
ENSG00000174326	ENST00000574600	SLC16A11	ENSMUSG00000040938	Slc16a11	ortholog_one2one
ENSG00000174326	ENST00000447225	SLC16A11	ENSMUSG00000040938	Slc16a11	ortholog_one2one
ENSG00000120158	ENST00000381750	RCL1	ENSMUSG00000024785	Rcl1	ortholog_one2one
ENSG00000120158	ENST00000381732	RCL1	ENSMUSG00000024785	Rcl1	ortholog_one2one
ENSG00000120158	ENST00000442869	RCL1	ENSMUSG00000024785	Rcl1	ortholog_one2one
ENSG00000120158	ENST00000473230	RCL1	ENSMUSG00000024785	Rcl1	ortholog_one2one
ENSG00000120158	ENST00000381730	RCL1	ENSMUSG00000024785	Rcl1	ortholog_one2one
ENSG00000120158	ENST00000381728	RCL1	ENSMUSG00000024785	Rcl1	ortholog_one2one
ENSG00000120158	ENST00000441844	RCL1	ENSMUSG00000024785	Rcl1	ortholog_one2one
ENSG00000120158	ENST00000445485	RCL1	ENSMUSG00000024785	Rcl1	ortholog_one2one
ENSG00000120158	ENST00000448872	RCL1	ENSMUSG00000024785	Rcl1	ortholog_one2one
ENSG00000111859	ENST00000379446	NEDD9	ENSMUSG00000021365	Nedd9	ortholog_one2one
ENSG00000111859	ENST00000448183	NEDD9	ENSMUSG00000021365	Nedd9	ortholog_one2one
ENSG00000111859	ENST00000504387	NEDD9	ENSMUSG00000021365	Nedd9	ortholog_one2one
ENSG00000111859	ENST00000505589	NEDD9	ENSMUSG00000021365	Nedd9	ortholog_one2one
ENSG00000111859	ENST00000379433	NEDD9	ENSMUSG00000021365	Nedd9	ortholog_one2one
ENSG00000111859	ENST00000513989	NEDD9	ENSMUSG00000021365	Nedd9	ortholog_one2one
ENSG00000111859	ENST00000397378	NEDD9	ENSMUSG00000021365	Nedd9	ortholog_one2one
ENSG00000111859	ENST00000508546	NEDD9	ENSMUSG00000021365	Nedd9	ortholog_one2one
ENSG00000111859	ENST00000468612	NEDD9	ENSMUSG00000021365	Nedd9	ortholog_one2one
ENSG00000111859	ENST00000512665	NEDD9	ENSMUSG00000021365	Nedd9	ortholog_one2one
ENSG00000111859	ENST00000504634	NEDD9	ENSMUSG00000021365	Nedd9	ortholog_one2one
ENSG00000111859	ENST00000459670	NEDD9	ENSMUSG00000021365	Nedd9	ortholog_one2one
ENSG00000111859	ENST00000514660	NEDD9	ENSMUSG00000021365	Nedd9	ortholog_one2one
ENSG00000111859	ENST00000461055	NEDD9	ENSMUSG00000021365	Nedd9	ortholog_one2one
ENSG00000111859	ENST00000508800	NEDD9	ENSMUSG00000021365	Nedd9	ortholog_one2one
ENSG00000111859	ENST00000620854	NEDD9	ENSMUSG00000021365	Nedd9	ortholog_one2one
ENSG00000149742	ENST00000536333	SLC22A9	ENSMUSG00000053303	Slc22a26	ortholog_one2many
ENSG00000149742	ENST00000279178	SLC22A9	ENSMUSG00000053303	Slc22a26	ortholog_one2many
ENSG00000149742	ENST00000536333	SLC22A9	ENSMUSG00000063590	Slc22a28	ortholog_one2many
ENSG00000149742	ENST00000279178	SLC22A9	ENSMUSG00000063590	Slc22a28	ortholog_one2many
ENSG00000149742	ENST00000536333	SLC22A9	ENSMUSG00000052562	Slc22a30	ortholog_one2many
ENSG00000149742	ENST00000279178	SLC22A9	ENSMUSG00000052562	Slc22a30	ortholog_one2many
ENSG00000149742	ENST00000536333	SLC22A9	ENSMUSG00000024757	Slc22a19	ortholog_one2many
ENSG00000149742	ENST00000279178	SLC22A9	ENSMUSG00000024757	Slc22a19	ortholog_one2many
ENSG00000149742	ENST00000536333	SLC22A9	ENSMUSG00000067656	Slc22a27	ortholog_one2many
ENSG00000149742	ENST00000279178	SLC22A9	ENSMUSG00000067656	Slc22a27	ortholog_one2many
ENSG00000149742	ENST00000536333	SLC22A9	ENSMUSG00000075044	Slc22a29	ortholog_one2many
ENSG00000149742	ENST00000279178	SLC22A9	ENSMUSG00000075044	Slc22a29	ortholog_one2many
ENSG00000084207	ENST00000398606	GSTP1	ENSMUSG00000038155	Gstp2	ortholog_one2many
ENSG00000084207	ENST00000398603	GSTP1	ENSMUSG00000038155	Gstp2	ortholog_one2many
ENSG00000084207	ENST00000642444	GSTP1	ENSMUSG00000038155	Gstp2	ortholog_one2many
ENSG00000084207	ENST00000494593	GSTP1	ENSMUSG00000038155	Gstp2	ortholog_one2many
ENSG00000084207	ENST00000646888	GSTP1	ENSMUSG00000038155	Gstp2	ortholog_one2many
ENSG00000084207	ENST00000489040	GSTP1	ENSMUSG00000038155	Gstp2	ortholog_one2many
ENSG00000084207	ENST00000498765	GSTP1	ENSMUSG00000038155	Gstp2	ortholog_one2many
ENSG00000084207	ENST00000467591	GSTP1	ENSMUSG00000038155	Gstp2	ortholog_one2many
ENSG00000084207	ENST00000495996	GSTP1	ENSMUSG00000038155	Gstp2	ortholog_one2many
ENSG00000084207	ENST00000398606	GSTP1	ENSMUSG00000060803	Gstp1	ortholog_one2many
ENSG00000084207	ENST00000398603	GSTP1	ENSMUSG00000060803	Gstp1	ortholog_one2many
ENSG00000084207	ENST00000642444	GSTP1	ENSMUSG00000060803	Gstp1	ortholog_one2many
ENSG00000084207	ENST00000494593	GSTP1	ENSMUSG00000060803	Gstp1	ortholog_one2many
ENSG00000084207	ENST00000646888	GSTP1	ENSMUSG00000060803	Gstp1	ortholog_one2many
ENSG00000084207	ENST00000489040	GSTP1	ENSMUSG00000060803	Gstp1	ortholog_one2many
ENSG00000084207	ENST00000498765	GSTP1	ENSMUSG00000060803	Gstp1	ortholog_one2many
ENSG00000084207	ENST00000467591	GSTP1	ENSMUSG00000060803	Gstp1	ortholog_one2many
ENSG00000084207	ENST00000495996	GSTP1	ENSMUSG00000060803	Gstp1	ortholog_one2many
ENSG00000064687	ENST00000611490	ABCA7	ENSMUSG00000035722	Abca7	ortholog_one2one
ENSG00000064687	ENST00000526885	ABCA7	ENSMUSG00000035722	Abca7	ortholog_one2one
ENSG00000064687	ENST00000530703	ABCA7	ENSMUSG00000035722	Abca7	ortholog_one2one
ENSG00000064687	ENST00000525238	ABCA7	ENSMUSG00000035722	Abca7	ortholog_one2one
ENSG00000064687	ENST00000524850	ABCA7	ENSMUSG00000035722	Abca7	ortholog_one2one
ENSG00000064687	ENST00000531467	ABCA7	ENSMUSG00000035722	Abca7	ortholog_one2one
ENSG00000064687	ENST00000527496	ABCA7	ENSMUSG00000035722	Abca7	ortholog_one2one
ENSG00000064687	ENST00000433129	ABCA7	ENSMUSG00000035722	Abca7	ortholog_one2one
ENSG00000064687	ENST00000435683	ABCA7	ENSMUSG00000035722	Abca7	ortholog_one2one
ENSG00000064687	ENST00000533574	ABCA7	ENSMUSG00000035722	Abca7	ortholog_one2one
ENSG00000064687	ENST00000530092	ABCA7	ENSMUSG00000035722	Abca7	ortholog_one2one
ENSG00000064687	ENST00000529442	ABCA7	ENSMUSG00000035722	Abca7	ortholog_one2one
ENSG00000064687	ENST00000525073	ABCA7	ENSMUSG00000035722	Abca7	ortholog_one2one
ENSG00000064687	ENST00000532194	ABCA7	ENSMUSG00000035722	Abca7	ortholog_one2one
ENSG00000064687	ENST00000612569	ABCA7	ENSMUSG00000035722	Abca7	ortholog_one2one
ENSG00000064687	ENST00000525939	ABCA7	ENSMUSG00000035722	Abca7	ortholog_one2one
ENSG00000064687	ENST00000531478	ABCA7	ENSMUSG00000035722	Abca7	ortholog_one2one
ENSG00000064687	ENST00000524383	ABCA7	ENSMUSG00000035722	Abca7	ortholog_one2one
ENSG00000064687	ENST00000263094	ABCA7	ENSMUSG00000035722	Abca7	ortholog_one2one
ENSG00000140254	ENST00000267803	DUOXA1	ENSMUSG00000027224	Duoxa1	ortholog_one2one
ENSG00000140254	ENST00000559014	DUOXA1	ENSMUSG00000027224	Duoxa1	ortholog_one2one
ENSG00000140254	ENST00000558996	DUOXA1	ENSMUSG00000027224	Duoxa1	ortholog_one2one
ENSG00000140254	ENST00000430224	DUOXA1	ENSMUSG00000027224	Duoxa1	ortholog_one2one
ENSG00000140254	ENST00000559013	DUOXA1	ENSMUSG00000027224	Duoxa1	ortholog_one2one
ENSG00000140254	ENST00000558422	DUOXA1	ENSMUSG00000027224	Duoxa1	ortholog_one2one
ENSG00000140254	ENST00000560572	DUOXA1	ENSMUSG00000027224	Duoxa1	ortholog_one2one
ENSG00000140254	ENST00000558326	DUOXA1	ENSMUSG00000027224	Duoxa1	ortholog_one2one
ENSG00000140254	ENST00000559988	DUOXA1	ENSMUSG00000027224	Duoxa1	ortholog_one2one
ENSG00000140254	ENST00000559226	DUOXA1	ENSMUSG00000027224	Duoxa1	ortholog_one2one
ENSG00000140254	ENST00000558377	DUOXA1	ENSMUSG00000027224	Duoxa1	ortholog_one2one
ENSG00000140254	ENST00000559644	DUOXA1	ENSMUSG00000027224	Duoxa1	ortholog_one2one
ENSG00000140254	ENST00000558851	DUOXA1	ENSMUSG00000027224	Duoxa1	ortholog_one2one
ENSG00000140254	ENST00000559407	DUOXA1	ENSMUSG00000027224	Duoxa1	ortholog_one2one
ENSG00000140254	ENST00000558976	DUOXA1	ENSMUSG00000027224	Duoxa1	ortholog_one2one
ENSG00000140254	ENST00000613425	DUOXA1	ENSMUSG00000027224	Duoxa1	ortholog_one2one
ENSG00000163497	ENST00000295727	FEV	ENSMUSG00000055197	Fev	ortholog_one2one
ENSG00000163497	ENST00000470119	FEV	ENSMUSG00000055197	Fev	ortholog_one2one
ENSG00000115271	ENST00000473240	GCA	ENSMUSG00000026893	Gca	ortholog_one2one
ENSG00000115271	ENST00000446271	GCA	ENSMUSG00000026893	Gca	ortholog_one2one
ENSG00000115271	ENST00000429691	GCA	ENSMUSG00000026893	Gca	ortholog_one2one
ENSG00000115271	ENST00000437150	GCA	ENSMUSG00000026893	Gca	ortholog_one2one
ENSG00000115271	ENST00000481161	GCA	ENSMUSG00000026893	Gca	ortholog_one2one
ENSG00000115271	ENST00000453113	GCA	ENSMUSG00000026893	Gca	ortholog_one2one
ENSG00000115271	ENST00000487445	GCA	ENSMUSG00000026893	Gca	ortholog_one2one
ENSG00000115271	ENST00000479199	GCA	ENSMUSG00000026893	Gca	ortholog_one2one
ENSG00000115271	ENST00000233612	GCA	ENSMUSG00000026893	Gca	ortholog_one2one
ENSG00000115271	ENST00000414723	GCA	ENSMUSG00000026893	Gca	ortholog_one2one
ENSG00000119906	ENST00000238961	SLF2	ENSMUSG00000036097	Slf2	ortholog_one2one
ENSG00000119906	ENST00000370271	SLF2	ENSMUSG00000036097	Slf2	ortholog_one2one
ENSG00000119906	ENST00000649226	SLF2	ENSMUSG00000036097	Slf2	ortholog_one2one
ENSG00000119906	ENST00000370269	SLF2	ENSMUSG00000036097	Slf2	ortholog_one2one
ENSG00000119906	ENST00000609386	SLF2	ENSMUSG00000036097	Slf2	ortholog_one2one
ENSG00000119906	ENST00000481654	SLF2	ENSMUSG00000036097	Slf2	ortholog_one2one
ENSG00000101144	ENST00000395863	BMP7	ENSMUSG00000008999	Bmp7	ortholog_one2one
ENSG00000101144	ENST00000395864	BMP7	ENSMUSG00000008999	Bmp7	ortholog_one2one
ENSG00000101144	ENST00000476877	BMP7	ENSMUSG00000008999	Bmp7	ortholog_one2one
ENSG00000101144	ENST00000460817	BMP7	ENSMUSG00000008999	Bmp7	ortholog_one2one
ENSG00000101144	ENST00000450594	BMP7	ENSMUSG00000008999	Bmp7	ortholog_one2one
ENSG00000101144	ENST00000433911	BMP7	ENSMUSG00000008999	Bmp7	ortholog_one2one
ENSG00000101144	ENST00000463939	BMP7	ENSMUSG00000008999	Bmp7	ortholog_one2one
ENSG00000101144	ENST00000524700	BMP7	ENSMUSG00000008999	Bmp7	ortholog_one2one
ENSG00000101144	ENST00000530870	BMP7	ENSMUSG00000008999	Bmp7	ortholog_one2one
ENSG00000117906	ENST00000394885	RCN2	ENSMUSG00000032320	Rcn2	ortholog_one2one
ENSG00000117906	ENST00000320963	RCN2	ENSMUSG00000032320	Rcn2	ortholog_one2one
ENSG00000117906	ENST00000394883	RCN2	ENSMUSG00000032320	Rcn2	ortholog_one2one
ENSG00000117906	ENST00000557805	RCN2	ENSMUSG00000032320	Rcn2	ortholog_one2one
ENSG00000117906	ENST00000558598	RCN2	ENSMUSG00000032320	Rcn2	ortholog_one2one
ENSG00000117906	ENST00000560833	RCN2	ENSMUSG00000032320	Rcn2	ortholog_one2one
ENSG00000109881	ENST00000529615	CCDC34	ENSMUSG00000027160	Ccdc34	ortholog_one2one
ENSG00000109881	ENST00000328697	CCDC34	ENSMUSG00000027160	Ccdc34	ortholog_one2one
ENSG00000109881	ENST00000317945	CCDC34	ENSMUSG00000027160	Ccdc34	ortholog_one2one
ENSG00000158092	ENST00000288986	NCK1	ENSMUSG00000032475	Nck1	ortholog_one2one
ENSG00000158092	ENST00000481752	NCK1	ENSMUSG00000032475	Nck1	ortholog_one2one
ENSG00000158092	ENST00000491539	NCK1	ENSMUSG00000032475	Nck1	ortholog_one2one
ENSG00000158092	ENST00000485096	NCK1	ENSMUSG00000032475	Nck1	ortholog_one2one
ENSG00000158092	ENST00000476286	NCK1	ENSMUSG00000032475	Nck1	ortholog_one2one
ENSG00000158092	ENST00000460960	NCK1	ENSMUSG00000032475	Nck1	ortholog_one2one
ENSG00000158092	ENST00000478862	NCK1	ENSMUSG00000032475	Nck1	ortholog_one2one
ENSG00000158092	ENST00000488930	NCK1	ENSMUSG00000032475	Nck1	ortholog_one2one
ENSG00000158092	ENST00000496489	NCK1	ENSMUSG00000032475	Nck1	ortholog_one2one
ENSG00000158092	ENST00000469404	NCK1	ENSMUSG00000032475	Nck1	ortholog_one2one
ENSG00000158092	ENST00000467911	NCK1	ENSMUSG00000032475	Nck1	ortholog_one2one
ENSG00000158092	ENST00000482071	NCK1	ENSMUSG00000032475	Nck1	ortholog_one2one
ENSG00000124429	ENST00000262753	POF1B	ENSMUSG00000034607	Pof1b	ortholog_one2one
ENSG00000124429	ENST00000373145	POF1B	ENSMUSG00000034607	Pof1b	ortholog_one2one
ENSG00000107614	ENST00000354631	TRDMT1	ENSMUSG00000026723	Trdmt1	ortholog_one2one
ENSG00000107614	ENST00000377799	TRDMT1	ENSMUSG00000026723	Trdmt1	ortholog_one2one
ENSG00000107614	ENST00000495022	TRDMT1	ENSMUSG00000026723	Trdmt1	ortholog_one2one
ENSG00000107614	ENST00000452380	TRDMT1	ENSMUSG00000026723	Trdmt1	ortholog_one2one
ENSG00000107614	ENST00000488990	TRDMT1	ENSMUSG00000026723	Trdmt1	ortholog_one2one
ENSG00000107614	ENST00000313936	TRDMT1	ENSMUSG00000026723	Trdmt1	ortholog_one2one
ENSG00000107614	ENST00000436968	TRDMT1	ENSMUSG00000026723	Trdmt1	ortholog_one2one
ENSG00000107614	ENST00000525762	TRDMT1	ENSMUSG00000026723	Trdmt1	ortholog_one2one
ENSG00000107614	ENST00000424636	TRDMT1	ENSMUSG00000026723	Trdmt1	ortholog_one2one
ENSG00000107614	ENST00000486947	TRDMT1	ENSMUSG00000026723	Trdmt1	ortholog_one2one
ENSG00000107614	ENST00000451253	TRDMT1	ENSMUSG00000026723	Trdmt1	ortholog_one2one
ENSG00000107614	ENST00000479046	TRDMT1	ENSMUSG00000026723	Trdmt1	ortholog_one2one
ENSG00000166862	ENST00000300105	CACNG2	ENSMUSG00000019146	Cacng2	ortholog_one2one
ENSG00000166862	ENST00000480002	CACNG2	ENSMUSG00000019146	Cacng2	ortholog_one2one
ENSG00000053108	ENST00000265342	FSTL4	ENSMUSG00000036264	Fstl4	ortholog_one2one
ENSG00000053108	ENST00000509525	FSTL4	ENSMUSG00000036264	Fstl4	ortholog_one2one
ENSG00000053108	ENST00000511375	FSTL4	ENSMUSG00000036264	Fstl4	ortholog_one2one
ENSG00000053108	ENST00000507112	FSTL4	ENSMUSG00000036264	Fstl4	ortholog_one2one
ENSG00000053108	ENST00000514998	FSTL4	ENSMUSG00000036264	Fstl4	ortholog_one2one
ENSG00000053108	ENST00000510685	FSTL4	ENSMUSG00000036264	Fstl4	ortholog_one2one
ENSG00000053108	ENST00000621681	FSTL4	ENSMUSG00000036264	Fstl4	ortholog_one2one
ENSG00000153495	ENST00000497241	TEX29	ENSMUSG00000031512	Tex29	ortholog_one2one
ENSG00000153495	ENST00000283547	TEX29	ENSMUSG00000031512	Tex29	ortholog_one2one
ENSG00000137809	ENST00000423218	ITGA11	ENSMUSG00000032243	Itga11	ortholog_one2one
ENSG00000137809	ENST00000315757	ITGA11	ENSMUSG00000032243	Itga11	ortholog_one2one
ENSG00000137809	ENST00000569346	ITGA11	ENSMUSG00000032243	Itga11	ortholog_one2one
ENSG00000137809	ENST00000566429	ITGA11	ENSMUSG00000032243	Itga11	ortholog_one2one
ENSG00000137809	ENST00000562826	ITGA11	ENSMUSG00000032243	Itga11	ortholog_one2one
ENSG00000137809	ENST00000565868	ITGA11	ENSMUSG00000032243	Itga11	ortholog_one2one
ENSG00000137809	ENST00000568677	ITGA11	ENSMUSG00000032243	Itga11	ortholog_one2one
ENSG00000179299	ENST00000381782	NSUN7	ENSMUSG00000029206	Nsun7	ortholog_one2one
ENSG00000179299	ENST00000316607	NSUN7	ENSMUSG00000029206	Nsun7	ortholog_one2one
ENSG00000179299	ENST00000473399	NSUN7	ENSMUSG00000029206	Nsun7	ortholog_one2one
ENSG00000179299	ENST00000463952	NSUN7	ENSMUSG00000029206	Nsun7	ortholog_one2one
ENSG00000179299	ENST00000469033	NSUN7	ENSMUSG00000029206	Nsun7	ortholog_one2one
ENSG00000179299	ENST00000423784	NSUN7	ENSMUSG00000029206	Nsun7	ortholog_one2one
ENSG00000179299	ENST00000478857	NSUN7	ENSMUSG00000029206	Nsun7	ortholog_one2one
ENSG00000135245	ENST00000435296	HILPDA	ENSMUSG00000043421	Hilpda	ortholog_one2one
ENSG00000135245	ENST00000257696	HILPDA	ENSMUSG00000043421	Hilpda	ortholog_one2one
ENSG00000135245	ENST00000481454	HILPDA	ENSMUSG00000043421	Hilpda	ortholog_one2one
ENSG00000135245	ENST00000466473	HILPDA	ENSMUSG00000043421	Hilpda	ortholog_one2one
ENSG00000179468	ENST00000350513	OR9A2	ENSMUSG00000045479	Olfr459	ortholog_one2one
ENSG00000104660	ENST00000321250	LEPROTL1	ENSMUSG00000031513	Leprotl1	ortholog_one2one
ENSG00000104660	ENST00000518001	LEPROTL1	ENSMUSG00000031513	Leprotl1	ortholog_one2one
ENSG00000104660	ENST00000650149	LEPROTL1	ENSMUSG00000031513	Leprotl1	ortholog_one2one
ENSG00000104660	ENST00000520682	LEPROTL1	ENSMUSG00000031513	Leprotl1	ortholog_one2one
ENSG00000104660	ENST00000442880	LEPROTL1	ENSMUSG00000031513	Leprotl1	ortholog_one2one
ENSG00000104660	ENST00000523116	LEPROTL1	ENSMUSG00000031513	Leprotl1	ortholog_one2one
ENSG00000104660	ENST00000520739	LEPROTL1	ENSMUSG00000031513	Leprotl1	ortholog_one2one
ENSG00000104660	ENST00000518192	LEPROTL1	ENSMUSG00000031513	Leprotl1	ortholog_one2one
ENSG00000104660	ENST00000519466	LEPROTL1	ENSMUSG00000031513	Leprotl1	ortholog_one2one
ENSG00000132383	ENST00000571058	RPA1	ENSMUSG00000000751	Rpa1	ortholog_one2one
ENSG00000132383	ENST00000570451	RPA1	ENSMUSG00000000751	Rpa1	ortholog_one2one
ENSG00000132383	ENST00000254719	RPA1	ENSMUSG00000000751	Rpa1	ortholog_one2one
ENSG00000132383	ENST00000571725	RPA1	ENSMUSG00000000751	Rpa1	ortholog_one2one
ENSG00000132383	ENST00000573924	RPA1	ENSMUSG00000000751	Rpa1	ortholog_one2one
ENSG00000132383	ENST00000574049	RPA1	ENSMUSG00000000751	Rpa1	ortholog_one2one
ENSG00000132383	ENST00000573994	RPA1	ENSMUSG00000000751	Rpa1	ortholog_one2one
ENSG00000164902	ENST00000297540	PHAX	ENSMUSG00000008301	Phax	ortholog_one2one
ENSG00000164902	ENST00000514725	PHAX	ENSMUSG00000008301	Phax	ortholog_one2one
ENSG00000164902	ENST00000505674	PHAX	ENSMUSG00000008301	Phax	ortholog_one2one
ENSG00000164902	ENST00000511371	PHAX	ENSMUSG00000008301	Phax	ortholog_one2one
ENSG00000164902	ENST00000513813	PHAX	ENSMUSG00000008301	Phax	ortholog_one2one
ENSG00000179934	ENST00000326306	CCR8	ENSMUSG00000042262	Ccr8	ortholog_one2one
ENSG00000179934	ENST00000414803	CCR8	ENSMUSG00000042262	Ccr8	ortholog_one2one
ENSG00000103415	ENST00000575051	HMOX2	ENSMUSG00000004070	Hmox2	ortholog_one2one
ENSG00000103415	ENST00000570646	HMOX2	ENSMUSG00000004070	Hmox2	ortholog_one2one
ENSG00000103415	ENST00000458134	HMOX2	ENSMUSG00000004070	Hmox2	ortholog_one2one
ENSG00000103415	ENST00000219700	HMOX2	ENSMUSG00000004070	Hmox2	ortholog_one2one
ENSG00000103415	ENST00000575120	HMOX2	ENSMUSG00000004070	Hmox2	ortholog_one2one
ENSG00000103415	ENST00000572812	HMOX2	ENSMUSG00000004070	Hmox2	ortholog_one2one
ENSG00000103415	ENST00000574466	HMOX2	ENSMUSG00000004070	Hmox2	ortholog_one2one
ENSG00000103415	ENST00000576827	HMOX2	ENSMUSG00000004070	Hmox2	ortholog_one2one
ENSG00000103415	ENST00000574594	HMOX2	ENSMUSG00000004070	Hmox2	ortholog_one2one
ENSG00000103415	ENST00000570445	HMOX2	ENSMUSG00000004070	Hmox2	ortholog_one2one
ENSG00000103415	ENST00000575129	HMOX2	ENSMUSG00000004070	Hmox2	ortholog_one2one
ENSG00000103415	ENST00000398595	HMOX2	ENSMUSG00000004070	Hmox2	ortholog_one2one
ENSG00000103415	ENST00000570622	HMOX2	ENSMUSG00000004070	Hmox2	ortholog_one2one
ENSG00000103415	ENST00000619528	HMOX2	ENSMUSG00000004070	Hmox2	ortholog_one2one
ENSG00000103415	ENST00000414777	HMOX2	ENSMUSG00000004070	Hmox2	ortholog_one2one
ENSG00000103415	ENST00000406590	HMOX2	ENSMUSG00000004070	Hmox2	ortholog_one2one
ENSG00000103415	ENST00000619913	HMOX2	ENSMUSG00000004070	Hmox2	ortholog_one2one
ENSG00000103415	ENST00000613539	HMOX2	ENSMUSG00000004070	Hmox2	ortholog_one2one
ENSG00000165055	ENST00000482555	METTL2B	ENSMUSG00000020691	Mettl2	ortholog_one2many
ENSG00000165055	ENST00000262432	METTL2B	ENSMUSG00000020691	Mettl2	ortholog_one2many
ENSG00000165055	ENST00000497665	METTL2B	ENSMUSG00000020691	Mettl2	ortholog_one2many
ENSG00000165055	ENST00000480046	METTL2B	ENSMUSG00000020691	Mettl2	ortholog_one2many
ENSG00000165055	ENST00000473488	METTL2B	ENSMUSG00000020691	Mettl2	ortholog_one2many
ENSG00000165055	ENST00000419443	METTL2B	ENSMUSG00000020691	Mettl2	ortholog_one2many
ENSG00000165055	ENST00000481392	METTL2B	ENSMUSG00000020691	Mettl2	ortholog_one2many
ENSG00000162949	ENST00000450650	CAPN13	ENSMUSG00000043705	Capn13	ortholog_one2one
ENSG00000162949	ENST00000295055	CAPN13	ENSMUSG00000043705	Capn13	ortholog_one2one
ENSG00000162949	ENST00000490786	CAPN13	ENSMUSG00000043705	Capn13	ortholog_one2one
ENSG00000162949	ENST00000458085	CAPN13	ENSMUSG00000043705	Capn13	ortholog_one2one
ENSG00000162949	ENST00000465450	CAPN13	ENSMUSG00000043705	Capn13	ortholog_one2one
ENSG00000162949	ENST00000465960	CAPN13	ENSMUSG00000043705	Capn13	ortholog_one2one
ENSG00000162949	ENST00000485248	CAPN13	ENSMUSG00000043705	Capn13	ortholog_one2one
ENSG00000087884	ENST00000532481	AAMDC	ENSMUSG00000035642	Aamdc	ortholog_one2one
ENSG00000087884	ENST00000526164	AAMDC	ENSMUSG00000035642	Aamdc	ortholog_one2one
ENSG00000087884	ENST00000526415	AAMDC	ENSMUSG00000035642	Aamdc	ortholog_one2one
ENSG00000087884	ENST00000531855	AAMDC	ENSMUSG00000035642	Aamdc	ortholog_one2one
ENSG00000087884	ENST00000393427	AAMDC	ENSMUSG00000035642	Aamdc	ortholog_one2one
ENSG00000087884	ENST00000527134	AAMDC	ENSMUSG00000035642	Aamdc	ortholog_one2one
ENSG00000087884	ENST00000304716	AAMDC	ENSMUSG00000035642	Aamdc	ortholog_one2one
ENSG00000087884	ENST00000525409	AAMDC	ENSMUSG00000035642	Aamdc	ortholog_one2one
ENSG00000087884	ENST00000533193	AAMDC	ENSMUSG00000035642	Aamdc	ortholog_one2one
ENSG00000087884	ENST00000525034	AAMDC	ENSMUSG00000035642	Aamdc	ortholog_one2one
ENSG00000087884	ENST00000529666	AAMDC	ENSMUSG00000035642	Aamdc	ortholog_one2one
ENSG00000087884	ENST00000630098	AAMDC	ENSMUSG00000035642	Aamdc	ortholog_one2one
ENSG00000173275	ENST00000370761	ZNF449	ENSMUSG00000073176	Zfp449	ortholog_one2one
ENSG00000173275	ENST00000339249	ZNF449	ENSMUSG00000073176	Zfp449	ortholog_one2one
ENSG00000140853	ENST00000539881	NLRC5	ENSMUSG00000074151	Nlrc5	ortholog_one2one
ENSG00000140853	ENST00000262510	NLRC5	ENSMUSG00000074151	Nlrc5	ortholog_one2one
ENSG00000140853	ENST00000543141	NLRC5	ENSMUSG00000074151	Nlrc5	ortholog_one2one
ENSG00000140853	ENST00000538273	NLRC5	ENSMUSG00000074151	Nlrc5	ortholog_one2one
ENSG00000140853	ENST00000535658	NLRC5	ENSMUSG00000074151	Nlrc5	ortholog_one2one
ENSG00000140853	ENST00000544641	NLRC5	ENSMUSG00000074151	Nlrc5	ortholog_one2one
ENSG00000140853	ENST00000538059	NLRC5	ENSMUSG00000074151	Nlrc5	ortholog_one2one
ENSG00000140853	ENST00000539144	NLRC5	ENSMUSG00000074151	Nlrc5	ortholog_one2one
ENSG00000140853	ENST00000538805	NLRC5	ENSMUSG00000074151	Nlrc5	ortholog_one2one
ENSG00000140853	ENST00000545081	NLRC5	ENSMUSG00000074151	Nlrc5	ortholog_one2one
ENSG00000140853	ENST00000538110	NLRC5	ENSMUSG00000074151	Nlrc5	ortholog_one2one
ENSG00000140853	ENST00000536231	NLRC5	ENSMUSG00000074151	Nlrc5	ortholog_one2one
ENSG00000140853	ENST00000543030	NLRC5	ENSMUSG00000074151	Nlrc5	ortholog_one2one
ENSG00000140853	ENST00000538453	NLRC5	ENSMUSG00000074151	Nlrc5	ortholog_one2one
ENSG00000140853	ENST00000540182	NLRC5	ENSMUSG00000074151	Nlrc5	ortholog_one2one
ENSG00000140853	ENST00000538930	NLRC5	ENSMUSG00000074151	Nlrc5	ortholog_one2one
ENSG00000140853	ENST00000538778	NLRC5	ENSMUSG00000074151	Nlrc5	ortholog_one2one
ENSG00000140853	ENST00000541020	NLRC5	ENSMUSG00000074151	Nlrc5	ortholog_one2one
ENSG00000140853	ENST00000537056	NLRC5	ENSMUSG00000074151	Nlrc5	ortholog_one2one
ENSG00000140853	ENST00000534931	NLRC5	ENSMUSG00000074151	Nlrc5	ortholog_one2one
ENSG00000140853	ENST00000399221	NLRC5	ENSMUSG00000074151	Nlrc5	ortholog_one2one
ENSG00000140853	ENST00000535284	NLRC5	ENSMUSG00000074151	Nlrc5	ortholog_one2one
ENSG00000140853	ENST00000543402	NLRC5	ENSMUSG00000074151	Nlrc5	ortholog_one2one
ENSG00000140853	ENST00000545349	NLRC5	ENSMUSG00000074151	Nlrc5	ortholog_one2one
ENSG00000140853	ENST00000544189	NLRC5	ENSMUSG00000074151	Nlrc5	ortholog_one2one
ENSG00000140853	ENST00000534927	NLRC5	ENSMUSG00000074151	Nlrc5	ortholog_one2one
ENSG00000140853	ENST00000543103	NLRC5	ENSMUSG00000074151	Nlrc5	ortholog_one2one
ENSG00000140853	ENST00000543049	NLRC5	ENSMUSG00000074151	Nlrc5	ortholog_one2one
ENSG00000140853	ENST00000436936	NLRC5	ENSMUSG00000074151	Nlrc5	ortholog_one2one
ENSG00000104833	ENST00000264071	TUBB4A	ENSMUSG00000062591	Tubb4a	ortholog_one2one
ENSG00000104833	ENST00000594276	TUBB4A	ENSMUSG00000062591	Tubb4a	ortholog_one2one
ENSG00000104833	ENST00000594075	TUBB4A	ENSMUSG00000062591	Tubb4a	ortholog_one2one
ENSG00000104833	ENST00000600216	TUBB4A	ENSMUSG00000062591	Tubb4a	ortholog_one2one
ENSG00000104833	ENST00000595324	TUBB4A	ENSMUSG00000062591	Tubb4a	ortholog_one2one
ENSG00000104833	ENST00000601152	TUBB4A	ENSMUSG00000062591	Tubb4a	ortholog_one2one
ENSG00000104833	ENST00000598006	TUBB4A	ENSMUSG00000062591	Tubb4a	ortholog_one2one
ENSG00000104833	ENST00000596291	TUBB4A	ENSMUSG00000062591	Tubb4a	ortholog_one2one
ENSG00000104833	ENST00000597686	TUBB4A	ENSMUSG00000062591	Tubb4a	ortholog_one2one
ENSG00000104833	ENST00000596926	TUBB4A	ENSMUSG00000062591	Tubb4a	ortholog_one2one
ENSG00000104833	ENST00000594290	TUBB4A	ENSMUSG00000062591	Tubb4a	ortholog_one2one
ENSG00000104833	ENST00000601640	TUBB4A	ENSMUSG00000062591	Tubb4a	ortholog_one2one
ENSG00000104833	ENST00000598635	TUBB4A	ENSMUSG00000062591	Tubb4a	ortholog_one2one
ENSG00000134755	ENST00000280904	DSC2	ENSMUSG00000024331	Dsc2	ortholog_one2one
ENSG00000134755	ENST00000251081	DSC2	ENSMUSG00000024331	Dsc2	ortholog_one2one
ENSG00000134755	ENST00000648081	DSC2	ENSMUSG00000024331	Dsc2	ortholog_one2one
ENSG00000159763	ENST00000291009	PIP	ENSMUSG00000058499	Pip	ortholog_one2one
ENSG00000118260	ENST00000430624	CREB1	ENSMUSG00000025958	Creb1	ortholog_one2one
ENSG00000118260	ENST00000432329	CREB1	ENSMUSG00000025958	Creb1	ortholog_one2one
ENSG00000118260	ENST00000353267	CREB1	ENSMUSG00000025958	Creb1	ortholog_one2one
ENSG00000118260	ENST00000445803	CREB1	ENSMUSG00000025958	Creb1	ortholog_one2one
ENSG00000118260	ENST00000421139	CREB1	ENSMUSG00000025958	Creb1	ortholog_one2one
ENSG00000118260	ENST00000494094	CREB1	ENSMUSG00000025958	Creb1	ortholog_one2one
ENSG00000118260	ENST00000452474	CREB1	ENSMUSG00000025958	Creb1	ortholog_one2one
ENSG00000118260	ENST00000414681	CREB1	ENSMUSG00000025958	Creb1	ortholog_one2one
ENSG00000118260	ENST00000480189	CREB1	ENSMUSG00000025958	Creb1	ortholog_one2one
ENSG00000118260	ENST00000464407	CREB1	ENSMUSG00000025958	Creb1	ortholog_one2one
ENSG00000118260	ENST00000448277	CREB1	ENSMUSG00000025958	Creb1	ortholog_one2one
ENSG00000118260	ENST00000457101	CREB1	ENSMUSG00000025958	Creb1	ortholog_one2one
ENSG00000118260	ENST00000418081	CREB1	ENSMUSG00000025958	Creb1	ortholog_one2one
ENSG00000118260	ENST00000455757	CREB1	ENSMUSG00000025958	Creb1	ortholog_one2one
ENSG00000118260	ENST00000494983	CREB1	ENSMUSG00000025958	Creb1	ortholog_one2one
ENSG00000118260	ENST00000446449	CREB1	ENSMUSG00000025958	Creb1	ortholog_one2one
ENSG00000118260	ENST00000451164	CREB1	ENSMUSG00000025958	Creb1	ortholog_one2one
ENSG00000067064	ENST00000429642	IDI1	ENSMUSG00000058258	Idi1	ortholog_one2one
ENSG00000067064	ENST00000381344	IDI1	ENSMUSG00000058258	Idi1	ortholog_one2one
ENSG00000067064	ENST00000491735	IDI1	ENSMUSG00000058258	Idi1	ortholog_one2one
ENSG00000067064	ENST00000427898	IDI1	ENSMUSG00000058258	Idi1	ortholog_one2one
ENSG00000067064	ENST00000482091	IDI1	ENSMUSG00000058258	Idi1	ortholog_one2one
ENSG00000178947	ENST00000417443	SMIM10L2A	ENSMUSG00000054850	Smim10l2a	ortholog_one2many
ENSG00000165359	ENST00000639893	INTS6L	ENSMUSG00000035967	Ints6l	ortholog_one2one
ENSG00000165359	ENST00000370752	INTS6L	ENSMUSG00000035967	Ints6l	ortholog_one2one
ENSG00000165359	ENST00000481908	INTS6L	ENSMUSG00000035967	Ints6l	ortholog_one2one
ENSG00000165359	ENST00000493637	INTS6L	ENSMUSG00000035967	Ints6l	ortholog_one2one
ENSG00000165359	ENST00000494957	INTS6L	ENSMUSG00000035967	Ints6l	ortholog_one2one
ENSG00000165359	ENST00000481429	INTS6L	ENSMUSG00000035967	Ints6l	ortholog_one2one
ENSG00000110375	ENST00000534788	UPK2	ENSMUSG00000041523	Upk2	ortholog_one2one
ENSG00000110375	ENST00000264031	UPK2	ENSMUSG00000041523	Upk2	ortholog_one2one
ENSG00000179913	ENST00000599265	B3GNT3	ENSMUSG00000031803	B3gnt3	ortholog_one2one
ENSG00000179913	ENST00000318683	B3GNT3	ENSMUSG00000031803	B3gnt3	ortholog_one2one
ENSG00000179913	ENST00000600777	B3GNT3	ENSMUSG00000031803	B3gnt3	ortholog_one2one
ENSG00000179913	ENST00000595387	B3GNT3	ENSMUSG00000031803	B3gnt3	ortholog_one2one
ENSG00000110218	ENST00000227638	PANX1	ENSMUSG00000031934	Panx1	ortholog_one2one
ENSG00000110218	ENST00000436171	PANX1	ENSMUSG00000031934	Panx1	ortholog_one2one
ENSG00000196900	ENST00000357147	TEX43	ENSMUSG00000032900	Tex43	ortholog_one2one
ENSG00000196900	ENST00000506701	TEX43	ENSMUSG00000032900	Tex43	ortholog_one2one
ENSG00000188655	ENST00000338904	RNASE9	ENSMUSG00000052382	Rnase9	ortholog_one2one
ENSG00000188655	ENST00000554964	RNASE9	ENSMUSG00000052382	Rnase9	ortholog_one2one
ENSG00000188655	ENST00000555230	RNASE9	ENSMUSG00000052382	Rnase9	ortholog_one2one
ENSG00000188655	ENST00000557068	RNASE9	ENSMUSG00000052382	Rnase9	ortholog_one2one
ENSG00000188655	ENST00000404716	RNASE9	ENSMUSG00000052382	Rnase9	ortholog_one2one
ENSG00000188655	ENST00000556208	RNASE9	ENSMUSG00000052382	Rnase9	ortholog_one2one
ENSG00000188655	ENST00000553541	RNASE9	ENSMUSG00000052382	Rnase9	ortholog_one2one
ENSG00000188655	ENST00000429244	RNASE9	ENSMUSG00000052382	Rnase9	ortholog_one2one
ENSG00000188655	ENST00000553706	RNASE9	ENSMUSG00000052382	Rnase9	ortholog_one2one
ENSG00000188655	ENST00000557209	RNASE9	ENSMUSG00000052382	Rnase9	ortholog_one2one
ENSG00000188655	ENST00000611135	RNASE9	ENSMUSG00000052382	Rnase9	ortholog_one2one
ENSG00000236398	ENST00000446620	TAS2R39	ENSMUSG00000047102	Tas2r139	ortholog_one2one
ENSG00000186174	ENST00000334801	BCL9L	ENSMUSG00000063382	Bcl9l	ortholog_one2one
ENSG00000186174	ENST00000526143	BCL9L	ENSMUSG00000063382	Bcl9l	ortholog_one2one
ENSG00000186174	ENST00000530293	BCL9L	ENSMUSG00000063382	Bcl9l	ortholog_one2one
ENSG00000186174	ENST00000527266	BCL9L	ENSMUSG00000063382	Bcl9l	ortholog_one2one
ENSG00000186174	ENST00000532899	BCL9L	ENSMUSG00000063382	Bcl9l	ortholog_one2one
ENSG00000186532	ENST00000305513	SMYD4	ENSMUSG00000018809	Smyd4	ortholog_one2one
ENSG00000186532	ENST00000491788	SMYD4	ENSMUSG00000018809	Smyd4	ortholog_one2one
ENSG00000186532	ENST00000476292	SMYD4	ENSMUSG00000018809	Smyd4	ortholog_one2one
ENSG00000186532	ENST00000570368	SMYD4	ENSMUSG00000018809	Smyd4	ortholog_one2one
ENSG00000186532	ENST00000571854	SMYD4	ENSMUSG00000018809	Smyd4	ortholog_one2one
ENSG00000186532	ENST00000573937	SMYD4	ENSMUSG00000018809	Smyd4	ortholog_one2one
ENSG00000186532	ENST00000576633	SMYD4	ENSMUSG00000018809	Smyd4	ortholog_one2one
ENSG00000110090	ENST00000540367	CPT1A	ENSMUSG00000024900	Cpt1a	ortholog_one2one
ENSG00000110090	ENST00000265641	CPT1A	ENSMUSG00000024900	Cpt1a	ortholog_one2one
ENSG00000110090	ENST00000539743	CPT1A	ENSMUSG00000024900	Cpt1a	ortholog_one2one
ENSG00000110090	ENST00000537756	CPT1A	ENSMUSG00000024900	Cpt1a	ortholog_one2one
ENSG00000110090	ENST00000538994	CPT1A	ENSMUSG00000024900	Cpt1a	ortholog_one2one
ENSG00000110090	ENST00000565318	CPT1A	ENSMUSG00000024900	Cpt1a	ortholog_one2one
ENSG00000110090	ENST00000569129	CPT1A	ENSMUSG00000024900	Cpt1a	ortholog_one2one
ENSG00000110090	ENST00000561996	CPT1A	ENSMUSG00000024900	Cpt1a	ortholog_one2one
ENSG00000110090	ENST00000376618	CPT1A	ENSMUSG00000024900	Cpt1a	ortholog_one2one
ENSG00000160111	ENST00000443236	CPAMD8	ENSMUSG00000059908	Mug1	ortholog_many2many
ENSG00000160111	ENST00000594249	CPAMD8	ENSMUSG00000059908	Mug1	ortholog_many2many
ENSG00000160111	ENST00000600235	CPAMD8	ENSMUSG00000059908	Mug1	ortholog_many2many
ENSG00000160111	ENST00000596224	CPAMD8	ENSMUSG00000059908	Mug1	ortholog_many2many
ENSG00000160111	ENST00000597335	CPAMD8	ENSMUSG00000059908	Mug1	ortholog_many2many
ENSG00000160111	ENST00000602132	CPAMD8	ENSMUSG00000059908	Mug1	ortholog_many2many
ENSG00000160111	ENST00000598547	CPAMD8	ENSMUSG00000059908	Mug1	ortholog_many2many
ENSG00000160111	ENST00000598792	CPAMD8	ENSMUSG00000059908	Mug1	ortholog_many2many
ENSG00000160111	ENST00000601782	CPAMD8	ENSMUSG00000059908	Mug1	ortholog_many2many
ENSG00000160111	ENST00000597709	CPAMD8	ENSMUSG00000059908	Mug1	ortholog_many2many
ENSG00000160111	ENST00000598104	CPAMD8	ENSMUSG00000059908	Mug1	ortholog_many2many
ENSG00000160111	ENST00000596572	CPAMD8	ENSMUSG00000059908	Mug1	ortholog_many2many
ENSG00000160111	ENST00000593739	CPAMD8	ENSMUSG00000059908	Mug1	ortholog_many2many
ENSG00000160111	ENST00000599287	CPAMD8	ENSMUSG00000059908	Mug1	ortholog_many2many
ENSG00000160111	ENST00000595323	CPAMD8	ENSMUSG00000059908	Mug1	ortholog_many2many
ENSG00000160111	ENST00000593420	CPAMD8	ENSMUSG00000059908	Mug1	ortholog_many2many
ENSG00000160111	ENST00000602159	CPAMD8	ENSMUSG00000059908	Mug1	ortholog_many2many
ENSG00000160111	ENST00000291440	CPAMD8	ENSMUSG00000059908	Mug1	ortholog_many2many
ENSG00000160111	ENST00000601637	CPAMD8	ENSMUSG00000059908	Mug1	ortholog_many2many
ENSG00000160111	ENST00000388925	CPAMD8	ENSMUSG00000059908	Mug1	ortholog_many2many
ENSG00000160111	ENST00000443236	CPAMD8	ENSMUSG00000030131	Mug2	ortholog_many2many
ENSG00000160111	ENST00000594249	CPAMD8	ENSMUSG00000030131	Mug2	ortholog_many2many
ENSG00000160111	ENST00000600235	CPAMD8	ENSMUSG00000030131	Mug2	ortholog_many2many
ENSG00000160111	ENST00000596224	CPAMD8	ENSMUSG00000030131	Mug2	ortholog_many2many
ENSG00000160111	ENST00000597335	CPAMD8	ENSMUSG00000030131	Mug2	ortholog_many2many
ENSG00000160111	ENST00000602132	CPAMD8	ENSMUSG00000030131	Mug2	ortholog_many2many
ENSG00000160111	ENST00000598547	CPAMD8	ENSMUSG00000030131	Mug2	ortholog_many2many
ENSG00000160111	ENST00000598792	CPAMD8	ENSMUSG00000030131	Mug2	ortholog_many2many
ENSG00000160111	ENST00000601782	CPAMD8	ENSMUSG00000030131	Mug2	ortholog_many2many
ENSG00000160111	ENST00000597709	CPAMD8	ENSMUSG00000030131	Mug2	ortholog_many2many
ENSG00000160111	ENST00000598104	CPAMD8	ENSMUSG00000030131	Mug2	ortholog_many2many
ENSG00000160111	ENST00000596572	CPAMD8	ENSMUSG00000030131	Mug2	ortholog_many2many
ENSG00000160111	ENST00000593739	CPAMD8	ENSMUSG00000030131	Mug2	ortholog_many2many
ENSG00000160111	ENST00000599287	CPAMD8	ENSMUSG00000030131	Mug2	ortholog_many2many
ENSG00000160111	ENST00000595323	CPAMD8	ENSMUSG00000030131	Mug2	ortholog_many2many
ENSG00000160111	ENST00000593420	CPAMD8	ENSMUSG00000030131	Mug2	ortholog_many2many
ENSG00000160111	ENST00000602159	CPAMD8	ENSMUSG00000030131	Mug2	ortholog_many2many
ENSG00000160111	ENST00000291440	CPAMD8	ENSMUSG00000030131	Mug2	ortholog_many2many
ENSG00000160111	ENST00000601637	CPAMD8	ENSMUSG00000030131	Mug2	ortholog_many2many
ENSG00000160111	ENST00000388925	CPAMD8	ENSMUSG00000030131	Mug2	ortholog_many2many
ENSG00000160111	ENST00000443236	CPAMD8	ENSMUSG00000108022	Gm7298	ortholog_many2many
ENSG00000160111	ENST00000594249	CPAMD8	ENSMUSG00000108022	Gm7298	ortholog_many2many
ENSG00000160111	ENST00000600235	CPAMD8	ENSMUSG00000108022	Gm7298	ortholog_many2many
ENSG00000160111	ENST00000596224	CPAMD8	ENSMUSG00000108022	Gm7298	ortholog_many2many
ENSG00000160111	ENST00000597335	CPAMD8	ENSMUSG00000108022	Gm7298	ortholog_many2many
ENSG00000160111	ENST00000602132	CPAMD8	ENSMUSG00000108022	Gm7298	ortholog_many2many
ENSG00000160111	ENST00000598547	CPAMD8	ENSMUSG00000108022	Gm7298	ortholog_many2many
ENSG00000160111	ENST00000598792	CPAMD8	ENSMUSG00000108022	Gm7298	ortholog_many2many
ENSG00000160111	ENST00000601782	CPAMD8	ENSMUSG00000108022	Gm7298	ortholog_many2many
ENSG00000160111	ENST00000597709	CPAMD8	ENSMUSG00000108022	Gm7298	ortholog_many2many
ENSG00000160111	ENST00000598104	CPAMD8	ENSMUSG00000108022	Gm7298	ortholog_many2many
ENSG00000160111	ENST00000596572	CPAMD8	ENSMUSG00000108022	Gm7298	ortholog_many2many
ENSG00000160111	ENST00000593739	CPAMD8	ENSMUSG00000108022	Gm7298	ortholog_many2many
ENSG00000160111	ENST00000599287	CPAMD8	ENSMUSG00000108022	Gm7298	ortholog_many2many
ENSG00000160111	ENST00000595323	CPAMD8	ENSMUSG00000108022	Gm7298	ortholog_many2many
ENSG00000160111	ENST00000593420	CPAMD8	ENSMUSG00000108022	Gm7298	ortholog_many2many
ENSG00000160111	ENST00000602159	CPAMD8	ENSMUSG00000108022	Gm7298	ortholog_many2many
ENSG00000160111	ENST00000291440	CPAMD8	ENSMUSG00000108022	Gm7298	ortholog_many2many
ENSG00000160111	ENST00000601637	CPAMD8	ENSMUSG00000108022	Gm7298	ortholog_many2many
ENSG00000160111	ENST00000388925	CPAMD8	ENSMUSG00000108022	Gm7298	ortholog_many2many
ENSG00000184611	ENST00000332142	KCNH7	ENSMUSG00000059742	Kcnh7	ortholog_one2one
ENSG00000184611	ENST00000328032	KCNH7	ENSMUSG00000059742	Kcnh7	ortholog_one2one
ENSG00000184611	ENST00000477019	KCNH7	ENSMUSG00000059742	Kcnh7	ortholog_one2one
ENSG00000184611	ENST00000621889	KCNH7	ENSMUSG00000059742	Kcnh7	ortholog_one2one
ENSG00000184611	ENST00000618399	KCNH7	ENSMUSG00000059742	Kcnh7	ortholog_one2one
ENSG00000148377	ENST00000277517	IDI2	ENSMUSG00000021148	Gm9745	ortholog_one2many
ENSG00000148377	ENST00000277517	IDI2	ENSMUSG00000033520	Idi2	ortholog_one2many
ENSG00000108784	ENST00000225927	NAGLU	ENSMUSG00000001751	Naglu	ortholog_one2one
ENSG00000108784	ENST00000586516	NAGLU	ENSMUSG00000001751	Naglu	ortholog_one2one
ENSG00000108784	ENST00000591587	NAGLU	ENSMUSG00000001751	Naglu	ortholog_one2one
ENSG00000108784	ENST00000590358	NAGLU	ENSMUSG00000001751	Naglu	ortholog_one2one
ENSG00000108784	ENST00000592454	NAGLU	ENSMUSG00000001751	Naglu	ortholog_one2one
ENSG00000186575	ENST00000338641	NF2	ENSMUSG00000009073	Nf2	ortholog_one2one
ENSG00000186575	ENST00000403435	NF2	ENSMUSG00000009073	Nf2	ortholog_one2one
ENSG00000186575	ENST00000361452	NF2	ENSMUSG00000009073	Nf2	ortholog_one2one
ENSG00000186575	ENST00000403999	NF2	ENSMUSG00000009073	Nf2	ortholog_one2one
ENSG00000186575	ENST00000334961	NF2	ENSMUSG00000009073	Nf2	ortholog_one2one
ENSG00000186575	ENST00000353887	NF2	ENSMUSG00000009073	Nf2	ortholog_one2one
ENSG00000186575	ENST00000432151	NF2	ENSMUSG00000009073	Nf2	ortholog_one2one
ENSG00000186575	ENST00000361166	NF2	ENSMUSG00000009073	Nf2	ortholog_one2one
ENSG00000186575	ENST00000361676	NF2	ENSMUSG00000009073	Nf2	ortholog_one2one
ENSG00000186575	ENST00000397789	NF2	ENSMUSG00000009073	Nf2	ortholog_one2one
ENSG00000186575	ENST00000413209	NF2	ENSMUSG00000009073	Nf2	ortholog_one2one
ENSG00000108960	ENST00000262065	MMD	ENSMUSG00000003948	Mmd	ortholog_one2one
ENSG00000108960	ENST00000649377	MMD	ENSMUSG00000003948	Mmd	ortholog_one2one
ENSG00000108960	ENST00000571578	MMD	ENSMUSG00000003948	Mmd	ortholog_one2one
ENSG00000108960	ENST00000577038	MMD	ENSMUSG00000003948	Mmd	ortholog_one2one
ENSG00000170471	ENST00000397042	RALGAPB	ENSMUSG00000027652	Ralgapb	ortholog_one2one
ENSG00000170471	ENST00000262879	RALGAPB	ENSMUSG00000027652	Ralgapb	ortholog_one2one
ENSG00000170471	ENST00000397040	RALGAPB	ENSMUSG00000027652	Ralgapb	ortholog_one2one
ENSG00000170471	ENST00000495949	RALGAPB	ENSMUSG00000027652	Ralgapb	ortholog_one2one
ENSG00000170471	ENST00000438490	RALGAPB	ENSMUSG00000027652	Ralgapb	ortholog_one2one
ENSG00000170471	ENST00000461423	RALGAPB	ENSMUSG00000027652	Ralgapb	ortholog_one2one
ENSG00000170471	ENST00000632792	RALGAPB	ENSMUSG00000027652	Ralgapb	ortholog_one2one
ENSG00000170471	ENST00000461147	RALGAPB	ENSMUSG00000027652	Ralgapb	ortholog_one2one
ENSG00000170471	ENST00000490114	RALGAPB	ENSMUSG00000027652	Ralgapb	ortholog_one2one
ENSG00000155463	ENST00000612549	OXA1L	ENSMUSG00000000959	Oxa1l	ortholog_one2one
ENSG00000155463	ENST00000483939	OXA1L	ENSMUSG00000000959	Oxa1l	ortholog_one2one
ENSG00000155463	ENST00000604262	OXA1L	ENSMUSG00000000959	Oxa1l	ortholog_one2one
ENSG00000155463	ENST00000557299	OXA1L	ENSMUSG00000000959	Oxa1l	ortholog_one2one
ENSG00000155463	ENST00000473744	OXA1L	ENSMUSG00000000959	Oxa1l	ortholog_one2one
ENSG00000155463	ENST00000442110	OXA1L	ENSMUSG00000000959	Oxa1l	ortholog_one2one
ENSG00000155463	ENST00000431881	OXA1L	ENSMUSG00000000959	Oxa1l	ortholog_one2one
ENSG00000155463	ENST00000412791	OXA1L	ENSMUSG00000000959	Oxa1l	ortholog_one2one
ENSG00000155463	ENST00000495424	OXA1L	ENSMUSG00000000959	Oxa1l	ortholog_one2one
ENSG00000155463	ENST00000358043	OXA1L	ENSMUSG00000000959	Oxa1l	ortholog_one2one
ENSG00000155463	ENST00000556473	OXA1L	ENSMUSG00000000959	Oxa1l	ortholog_one2one
ENSG00000155463	ENST00000481218	OXA1L	ENSMUSG00000000959	Oxa1l	ortholog_one2one
ENSG00000155463	ENST00000285848	OXA1L	ENSMUSG00000000959	Oxa1l	ortholog_one2one
ENSG00000171320	ENST00000523566	ESCO2	ENSMUSG00000022034	Esco2	ortholog_one2one
ENSG00000171320	ENST00000305188	ESCO2	ENSMUSG00000022034	Esco2	ortholog_one2one
ENSG00000171320	ENST00000522378	ESCO2	ENSMUSG00000022034	Esco2	ortholog_one2one
ENSG00000171320	ENST00000519637	ESCO2	ENSMUSG00000022034	Esco2	ortholog_one2one
ENSG00000171320	ENST00000524293	ESCO2	ENSMUSG00000022034	Esco2	ortholog_one2one
ENSG00000171320	ENST00000523910	ESCO2	ENSMUSG00000022034	Esco2	ortholog_one2one
ENSG00000171320	ENST00000518262	ESCO2	ENSMUSG00000022034	Esco2	ortholog_one2one
ENSG00000171320	ENST00000397418	ESCO2	ENSMUSG00000022034	Esco2	ortholog_one2one
ENSG00000107937	ENST00000360803	GTPBP4	ENSMUSG00000021149	Gtpbp4	ortholog_one2one
ENSG00000107937	ENST00000491635	GTPBP4	ENSMUSG00000021149	Gtpbp4	ortholog_one2one
ENSG00000107937	ENST00000360059	GTPBP4	ENSMUSG00000021149	Gtpbp4	ortholog_one2one
ENSG00000107937	ENST00000491261	GTPBP4	ENSMUSG00000021149	Gtpbp4	ortholog_one2one
ENSG00000107937	ENST00000483839	GTPBP4	ENSMUSG00000021149	Gtpbp4	ortholog_one2one
ENSG00000160683	ENST00000292174	CXCR5	ENSMUSG00000047880	Cxcr5	ortholog_one2one
ENSG00000180304	ENST00000326005	OAZ2	ENSMUSG00000040652	Oaz2	ortholog_one2one
ENSG00000180304	ENST00000558194	OAZ2	ENSMUSG00000040652	Oaz2	ortholog_one2one
ENSG00000180304	ENST00000560258	OAZ2	ENSMUSG00000040652	Oaz2	ortholog_one2one
ENSG00000180304	ENST00000559753	OAZ2	ENSMUSG00000040652	Oaz2	ortholog_one2one
ENSG00000180304	ENST00000560837	OAZ2	ENSMUSG00000040652	Oaz2	ortholog_one2one
ENSG00000180304	ENST00000559912	OAZ2	ENSMUSG00000040652	Oaz2	ortholog_one2one
ENSG00000180304	ENST00000560781	OAZ2	ENSMUSG00000040652	Oaz2	ortholog_one2one
ENSG00000180304	ENST00000559665	OAZ2	ENSMUSG00000040652	Oaz2	ortholog_one2one
ENSG00000180304	ENST00000559555	OAZ2	ENSMUSG00000040652	Oaz2	ortholog_one2one
ENSG00000109062	ENST00000583369	SLC9A3R1	ENSMUSG00000020733	Slc9a3r1	ortholog_one2one
ENSG00000109062	ENST00000262613	SLC9A3R1	ENSMUSG00000020733	Slc9a3r1	ortholog_one2one
ENSG00000109062	ENST00000413388	SLC9A3R1	ENSMUSG00000020733	Slc9a3r1	ortholog_one2one
ENSG00000109062	ENST00000578958	SLC9A3R1	ENSMUSG00000020733	Slc9a3r1	ortholog_one2one
ENSG00000109062	ENST00000581356	SLC9A3R1	ENSMUSG00000020733	Slc9a3r1	ortholog_one2one
ENSG00000102287	ENST00000370328	GABRE	ENSMUSG00000031340	Gabre	ortholog_one2one
ENSG00000102287	ENST00000483564	GABRE	ENSMUSG00000031340	Gabre	ortholog_one2one
ENSG00000102287	ENST00000486255	GABRE	ENSMUSG00000031340	Gabre	ortholog_one2one
ENSG00000102287	ENST00000495862	GABRE	ENSMUSG00000031340	Gabre	ortholog_one2one
ENSG00000102287	ENST00000489333	GABRE	ENSMUSG00000031340	Gabre	ortholog_one2one
ENSG00000102287	ENST00000462018	GABRE	ENSMUSG00000031340	Gabre	ortholog_one2one
ENSG00000102287	ENST00000441219	GABRE	ENSMUSG00000031340	Gabre	ortholog_one2one
ENSG00000102287	ENST00000476016	GABRE	ENSMUSG00000031340	Gabre	ortholog_one2one
ENSG00000102287	ENST00000474932	GABRE	ENSMUSG00000031340	Gabre	ortholog_one2one
ENSG00000102287	ENST00000465405	GABRE	ENSMUSG00000031340	Gabre	ortholog_one2one
ENSG00000102287	ENST00000491339	GABRE	ENSMUSG00000031340	Gabre	ortholog_one2one
ENSG00000102287	ENST00000417300	GABRE	ENSMUSG00000031340	Gabre	ortholog_one2one
ENSG00000149262	ENST00000433818	INTS4	ENSMUSG00000025133	Ints4	ortholog_one2one
ENSG00000149262	ENST00000534064	INTS4	ENSMUSG00000025133	Ints4	ortholog_one2one
ENSG00000149262	ENST00000533180	INTS4	ENSMUSG00000025133	Ints4	ortholog_one2one
ENSG00000149262	ENST00000525268	INTS4	ENSMUSG00000025133	Ints4	ortholog_one2one
ENSG00000149262	ENST00000531059	INTS4	ENSMUSG00000025133	Ints4	ortholog_one2one
ENSG00000149262	ENST00000525931	INTS4	ENSMUSG00000025133	Ints4	ortholog_one2one
ENSG00000149262	ENST00000529807	INTS4	ENSMUSG00000025133	Ints4	ortholog_one2one
ENSG00000149262	ENST00000534408	INTS4	ENSMUSG00000025133	Ints4	ortholog_one2one
ENSG00000149262	ENST00000524766	INTS4	ENSMUSG00000025133	Ints4	ortholog_one2one
ENSG00000149262	ENST00000527522	INTS4	ENSMUSG00000025133	Ints4	ortholog_one2one
ENSG00000149262	ENST00000535943	INTS4	ENSMUSG00000025133	Ints4	ortholog_one2one
ENSG00000108786	ENST00000585807	HSD17B1	ENSMUSG00000019301	Hsd17b1	ortholog_one2one
ENSG00000108786	ENST00000593215	HSD17B1	ENSMUSG00000019301	Hsd17b1	ortholog_one2one
ENSG00000108786	ENST00000587280	HSD17B1	ENSMUSG00000019301	Hsd17b1	ortholog_one2one
ENSG00000108786	ENST00000590299	HSD17B1	ENSMUSG00000019301	Hsd17b1	ortholog_one2one
ENSG00000108786	ENST00000225929	HSD17B1	ENSMUSG00000019301	Hsd17b1	ortholog_one2one
ENSG00000198730	ENST00000361367	CTR9	ENSMUSG00000005609	Ctr9	ortholog_one2one
ENSG00000198730	ENST00000524523	CTR9	ENSMUSG00000005609	Ctr9	ortholog_one2one
ENSG00000198730	ENST00000526874	CTR9	ENSMUSG00000005609	Ctr9	ortholog_one2one
ENSG00000198730	ENST00000529355	CTR9	ENSMUSG00000005609	Ctr9	ortholog_one2one
ENSG00000198730	ENST00000529898	CTR9	ENSMUSG00000005609	Ctr9	ortholog_one2one
ENSG00000198730	ENST00000532365	CTR9	ENSMUSG00000005609	Ctr9	ortholog_one2one
ENSG00000283208	ENST00000638147	AC001226.2	ENSMUSG00000022125	Cln5	ortholog_one2many
ENSG00000283208	ENST00000637192	AC001226.2	ENSMUSG00000022125	Cln5	ortholog_one2many
ENSG00000283208	ENST00000635838	AC001226.2	ENSMUSG00000022125	Cln5	ortholog_one2many
ENSG00000283208	ENST00000638101	AC001226.2	ENSMUSG00000022125	Cln5	ortholog_one2many
ENSG00000283208	ENST00000461131	AC001226.2	ENSMUSG00000022125	Cln5	ortholog_one2many
ENSG00000177105	ENST00000351018	RHOG	ENSMUSG00000073982	Rhog	ortholog_one2one
ENSG00000177105	ENST00000396979	RHOG	ENSMUSG00000073982	Rhog	ortholog_one2one
ENSG00000177105	ENST00000396978	RHOG	ENSMUSG00000073982	Rhog	ortholog_one2one
ENSG00000177105	ENST00000533217	RHOG	ENSMUSG00000073982	Rhog	ortholog_one2one
ENSG00000104880	ENST00000319670	ARHGEF18	ENSMUSG00000004568	Arhgef18	ortholog_one2many
ENSG00000104880	ENST00000599752	ARHGEF18	ENSMUSG00000004568	Arhgef18	ortholog_one2many
ENSG00000104880	ENST00000359920	ARHGEF18	ENSMUSG00000004568	Arhgef18	ortholog_one2many
ENSG00000104880	ENST00000595600	ARHGEF18	ENSMUSG00000004568	Arhgef18	ortholog_one2many
ENSG00000104880	ENST00000594665	ARHGEF18	ENSMUSG00000004568	Arhgef18	ortholog_one2many
ENSG00000182836	ENST00000377801	PLCXD3	ENSMUSG00000049148	Plcxd3	ortholog_one2one
ENSG00000182836	ENST00000328457	PLCXD3	ENSMUSG00000049148	Plcxd3	ortholog_one2one
ENSG00000118900	ENST00000592120	UBN1	ENSMUSG00000039473	Ubn1	ortholog_one2one
ENSG00000118900	ENST00000262376	UBN1	ENSMUSG00000039473	Ubn1	ortholog_one2one
ENSG00000118900	ENST00000590769	UBN1	ENSMUSG00000039473	Ubn1	ortholog_one2one
ENSG00000118900	ENST00000396658	UBN1	ENSMUSG00000039473	Ubn1	ortholog_one2one
ENSG00000118900	ENST00000587027	UBN1	ENSMUSG00000039473	Ubn1	ortholog_one2one
ENSG00000118900	ENST00000585857	UBN1	ENSMUSG00000039473	Ubn1	ortholog_one2one
ENSG00000118900	ENST00000586716	UBN1	ENSMUSG00000039473	Ubn1	ortholog_one2one
ENSG00000118900	ENST00000589191	UBN1	ENSMUSG00000039473	Ubn1	ortholog_one2one
ENSG00000118900	ENST00000586152	UBN1	ENSMUSG00000039473	Ubn1	ortholog_one2one
ENSG00000005812	ENST00000485797	FBXL3	ENSMUSG00000022124	Fbxl3	ortholog_one2one
ENSG00000005812	ENST00000477982	FBXL3	ENSMUSG00000022124	Fbxl3	ortholog_one2one
ENSG00000005812	ENST00000355619	FBXL3	ENSMUSG00000022124	Fbxl3	ortholog_one2one
ENSG00000005812	ENST00000417323	FBXL3	ENSMUSG00000022124	Fbxl3	ortholog_one2one
ENSG00000005812	ENST00000470210	FBXL3	ENSMUSG00000022124	Fbxl3	ortholog_one2one
ENSG00000005812	ENST00000472949	FBXL3	ENSMUSG00000022124	Fbxl3	ortholog_one2one
ENSG00000180176	ENST00000381178	TH	ENSMUSG00000000214	Th	ortholog_one2one
ENSG00000180176	ENST00000381175	TH	ENSMUSG00000000214	Th	ortholog_one2one
ENSG00000180176	ENST00000352909	TH	ENSMUSG00000000214	Th	ortholog_one2one
ENSG00000180176	ENST00000324155	TH	ENSMUSG00000000214	Th	ortholog_one2one
ENSG00000180176	ENST00000479437	TH	ENSMUSG00000000214	Th	ortholog_one2one
ENSG00000180176	ENST00000416223	TH	ENSMUSG00000000214	Th	ortholog_one2one
ENSG00000180176	ENST00000412076	TH	ENSMUSG00000000214	Th	ortholog_one2one
ENSG00000180176	ENST00000461172	TH	ENSMUSG00000000214	Th	ortholog_one2one
ENSG00000180176	ENST00000381168	TH	ENSMUSG00000000214	Th	ortholog_one2one
ENSG00000180176	ENST00000469226	TH	ENSMUSG00000000214	Th	ortholog_one2one
ENSG00000180176	ENST00000333684	TH	ENSMUSG00000000214	Th	ortholog_one2one
ENSG00000114209	ENST00000392750	PDCD10	ENSMUSG00000027835	Pdcd10	ortholog_one2one
ENSG00000114209	ENST00000473645	PDCD10	ENSMUSG00000027835	Pdcd10	ortholog_one2one
ENSG00000114209	ENST00000497056	PDCD10	ENSMUSG00000027835	Pdcd10	ortholog_one2one
ENSG00000114209	ENST00000492396	PDCD10	ENSMUSG00000027835	Pdcd10	ortholog_one2one
ENSG00000114209	ENST00000461494	PDCD10	ENSMUSG00000027835	Pdcd10	ortholog_one2one
ENSG00000114209	ENST00000470131	PDCD10	ENSMUSG00000027835	Pdcd10	ortholog_one2one
ENSG00000114209	ENST00000475915	PDCD10	ENSMUSG00000027835	Pdcd10	ortholog_one2one
ENSG00000114209	ENST00000487947	PDCD10	ENSMUSG00000027835	Pdcd10	ortholog_one2one
ENSG00000114209	ENST00000471885	PDCD10	ENSMUSG00000027835	Pdcd10	ortholog_one2one
ENSG00000114209	ENST00000479121	PDCD10	ENSMUSG00000027835	Pdcd10	ortholog_one2one
ENSG00000114209	ENST00000462725	PDCD10	ENSMUSG00000027835	Pdcd10	ortholog_one2one
ENSG00000114209	ENST00000492139	PDCD10	ENSMUSG00000027835	Pdcd10	ortholog_one2one
ENSG00000114209	ENST00000483451	PDCD10	ENSMUSG00000027835	Pdcd10	ortholog_one2one
ENSG00000114209	ENST00000494502	PDCD10	ENSMUSG00000027835	Pdcd10	ortholog_one2one
ENSG00000114209	ENST00000462830	PDCD10	ENSMUSG00000027835	Pdcd10	ortholog_one2one
ENSG00000114209	ENST00000464360	PDCD10	ENSMUSG00000027835	Pdcd10	ortholog_one2one
ENSG00000114209	ENST00000481136	PDCD10	ENSMUSG00000027835	Pdcd10	ortholog_one2one
ENSG00000114209	ENST00000487678	PDCD10	ENSMUSG00000027835	Pdcd10	ortholog_one2one
ENSG00000183597	ENST00000471707	TANGO2	ENSMUSG00000013539	Tango2	ortholog_one2one
ENSG00000183597	ENST00000401886	TANGO2	ENSMUSG00000013539	Tango2	ortholog_one2one
ENSG00000183597	ENST00000475446	TANGO2	ENSMUSG00000013539	Tango2	ortholog_one2one
ENSG00000183597	ENST00000432198	TANGO2	ENSMUSG00000013539	Tango2	ortholog_one2one
ENSG00000183597	ENST00000411907	TANGO2	ENSMUSG00000013539	Tango2	ortholog_one2one
ENSG00000183597	ENST00000398042	TANGO2	ENSMUSG00000013539	Tango2	ortholog_one2one
ENSG00000183597	ENST00000399807	TANGO2	ENSMUSG00000013539	Tango2	ortholog_one2one
ENSG00000183597	ENST00000450664	TANGO2	ENSMUSG00000013539	Tango2	ortholog_one2one
ENSG00000183597	ENST00000450019	TANGO2	ENSMUSG00000013539	Tango2	ortholog_one2one
ENSG00000183597	ENST00000327374	TANGO2	ENSMUSG00000013539	Tango2	ortholog_one2one
ENSG00000183597	ENST00000479679	TANGO2	ENSMUSG00000013539	Tango2	ortholog_one2one
ENSG00000183597	ENST00000430807	TANGO2	ENSMUSG00000013539	Tango2	ortholog_one2one
ENSG00000183597	ENST00000401833	TANGO2	ENSMUSG00000013539	Tango2	ortholog_one2one
ENSG00000183597	ENST00000434168	TANGO2	ENSMUSG00000013539	Tango2	ortholog_one2one
ENSG00000183597	ENST00000462579	TANGO2	ENSMUSG00000013539	Tango2	ortholog_one2one
ENSG00000183597	ENST00000444651	TANGO2	ENSMUSG00000013539	Tango2	ortholog_one2one
ENSG00000183597	ENST00000484373	TANGO2	ENSMUSG00000013539	Tango2	ortholog_one2one
ENSG00000183597	ENST00000485715	TANGO2	ENSMUSG00000013539	Tango2	ortholog_one2one
ENSG00000183597	ENST00000490583	TANGO2	ENSMUSG00000013539	Tango2	ortholog_one2one
ENSG00000183597	ENST00000490121	TANGO2	ENSMUSG00000013539	Tango2	ortholog_one2one
ENSG00000183597	ENST00000476940	TANGO2	ENSMUSG00000013539	Tango2	ortholog_one2one
ENSG00000183597	ENST00000434570	TANGO2	ENSMUSG00000013539	Tango2	ortholog_one2one
ENSG00000183597	ENST00000456048	TANGO2	ENSMUSG00000013539	Tango2	ortholog_one2one
ENSG00000183597	ENST00000432883	TANGO2	ENSMUSG00000013539	Tango2	ortholog_one2one
ENSG00000183597	ENST00000447208	TANGO2	ENSMUSG00000013539	Tango2	ortholog_one2one
ENSG00000183597	ENST00000420290	TANGO2	ENSMUSG00000013539	Tango2	ortholog_one2one
ENSG00000169398	ENST00000522684	PTK2	ENSMUSG00000022607	Ptk2	ortholog_one2one
ENSG00000169398	ENST00000519654	PTK2	ENSMUSG00000022607	Ptk2	ortholog_one2one
ENSG00000169398	ENST00000519465	PTK2	ENSMUSG00000022607	Ptk2	ortholog_one2one
ENSG00000169398	ENST00000517887	PTK2	ENSMUSG00000022607	Ptk2	ortholog_one2one
ENSG00000169398	ENST00000521059	PTK2	ENSMUSG00000022607	Ptk2	ortholog_one2one
ENSG00000169398	ENST00000517712	PTK2	ENSMUSG00000022607	Ptk2	ortholog_one2one
ENSG00000169398	ENST00000523539	PTK2	ENSMUSG00000022607	Ptk2	ortholog_one2one
ENSG00000169398	ENST00000340930	PTK2	ENSMUSG00000022607	Ptk2	ortholog_one2one
ENSG00000169398	ENST00000519993	PTK2	ENSMUSG00000022607	Ptk2	ortholog_one2one
ENSG00000169398	ENST00000519419	PTK2	ENSMUSG00000022607	Ptk2	ortholog_one2one
ENSG00000169398	ENST00000524202	PTK2	ENSMUSG00000022607	Ptk2	ortholog_one2one
ENSG00000169398	ENST00000430260	PTK2	ENSMUSG00000022607	Ptk2	ortholog_one2one
ENSG00000169398	ENST00000521986	PTK2	ENSMUSG00000022607	Ptk2	ortholog_one2one
ENSG00000169398	ENST00000523435	PTK2	ENSMUSG00000022607	Ptk2	ortholog_one2one
ENSG00000169398	ENST00000522950	PTK2	ENSMUSG00000022607	Ptk2	ortholog_one2one
ENSG00000169398	ENST00000523805	PTK2	ENSMUSG00000022607	Ptk2	ortholog_one2one
ENSG00000169398	ENST00000520460	PTK2	ENSMUSG00000022607	Ptk2	ortholog_one2one
ENSG00000169398	ENST00000521985	PTK2	ENSMUSG00000022607	Ptk2	ortholog_one2one
ENSG00000169398	ENST00000518173	PTK2	ENSMUSG00000022607	Ptk2	ortholog_one2one
ENSG00000169398	ENST00000522424	PTK2	ENSMUSG00000022607	Ptk2	ortholog_one2one
ENSG00000169398	ENST00000521562	PTK2	ENSMUSG00000022607	Ptk2	ortholog_one2one
ENSG00000169398	ENST00000521250	PTK2	ENSMUSG00000022607	Ptk2	ortholog_one2one
ENSG00000169398	ENST00000523388	PTK2	ENSMUSG00000022607	Ptk2	ortholog_one2one
ENSG00000169398	ENST00000521981	PTK2	ENSMUSG00000022607	Ptk2	ortholog_one2one
ENSG00000169398	ENST00000521029	PTK2	ENSMUSG00000022607	Ptk2	ortholog_one2one
ENSG00000169398	ENST00000518509	PTK2	ENSMUSG00000022607	Ptk2	ortholog_one2one
ENSG00000169398	ENST00000520917	PTK2	ENSMUSG00000022607	Ptk2	ortholog_one2one
ENSG00000169398	ENST00000520151	PTK2	ENSMUSG00000022607	Ptk2	ortholog_one2one
ENSG00000169398	ENST00000523670	PTK2	ENSMUSG00000022607	Ptk2	ortholog_one2one
ENSG00000169398	ENST00000519024	PTK2	ENSMUSG00000022607	Ptk2	ortholog_one2one
ENSG00000169398	ENST00000523746	PTK2	ENSMUSG00000022607	Ptk2	ortholog_one2one
ENSG00000169398	ENST00000510126	PTK2	ENSMUSG00000022607	Ptk2	ortholog_one2one
ENSG00000169398	ENST00000523474	PTK2	ENSMUSG00000022607	Ptk2	ortholog_one2one
ENSG00000169398	ENST00000519899	PTK2	ENSMUSG00000022607	Ptk2	ortholog_one2one
ENSG00000169398	ENST00000519361	PTK2	ENSMUSG00000022607	Ptk2	ortholog_one2one
ENSG00000169398	ENST00000520843	PTK2	ENSMUSG00000022607	Ptk2	ortholog_one2one
ENSG00000169398	ENST00000521172	PTK2	ENSMUSG00000022607	Ptk2	ortholog_one2one
ENSG00000169398	ENST00000524357	PTK2	ENSMUSG00000022607	Ptk2	ortholog_one2one
ENSG00000169398	ENST00000521791	PTK2	ENSMUSG00000022607	Ptk2	ortholog_one2one
ENSG00000169398	ENST00000523067	PTK2	ENSMUSG00000022607	Ptk2	ortholog_one2one
ENSG00000169398	ENST00000520828	PTK2	ENSMUSG00000022607	Ptk2	ortholog_one2one
ENSG00000169398	ENST00000520475	PTK2	ENSMUSG00000022607	Ptk2	ortholog_one2one
ENSG00000169398	ENST00000519881	PTK2	ENSMUSG00000022607	Ptk2	ortholog_one2one
ENSG00000169398	ENST00000520892	PTK2	ENSMUSG00000022607	Ptk2	ortholog_one2one
ENSG00000169398	ENST00000523803	PTK2	ENSMUSG00000022607	Ptk2	ortholog_one2one
ENSG00000169398	ENST00000521907	PTK2	ENSMUSG00000022607	Ptk2	ortholog_one2one
ENSG00000169398	ENST00000517453	PTK2	ENSMUSG00000022607	Ptk2	ortholog_one2one
ENSG00000169398	ENST00000520045	PTK2	ENSMUSG00000022607	Ptk2	ortholog_one2one
ENSG00000169398	ENST00000521395	PTK2	ENSMUSG00000022607	Ptk2	ortholog_one2one
ENSG00000169398	ENST00000523675	PTK2	ENSMUSG00000022607	Ptk2	ortholog_one2one
ENSG00000169398	ENST00000521332	PTK2	ENSMUSG00000022607	Ptk2	ortholog_one2one
ENSG00000169398	ENST00000524040	PTK2	ENSMUSG00000022607	Ptk2	ortholog_one2one
ENSG00000169398	ENST00000523679	PTK2	ENSMUSG00000022607	Ptk2	ortholog_one2one
ENSG00000169398	ENST00000524257	PTK2	ENSMUSG00000022607	Ptk2	ortholog_one2one
ENSG00000169398	ENST00000523797	PTK2	ENSMUSG00000022607	Ptk2	ortholog_one2one
ENSG00000169398	ENST00000519635	PTK2	ENSMUSG00000022607	Ptk2	ortholog_one2one
ENSG00000169398	ENST00000395218	PTK2	ENSMUSG00000022607	Ptk2	ortholog_one2one
ENSG00000170579	ENST00000400147	DLGAP1	ENSMUSG00000003279	Dlgap1	ortholog_one2one
ENSG00000170579	ENST00000400149	DLGAP1	ENSMUSG00000003279	Dlgap1	ortholog_one2one
ENSG00000170579	ENST00000400155	DLGAP1	ENSMUSG00000003279	Dlgap1	ortholog_one2one
ENSG00000170579	ENST00000400150	DLGAP1	ENSMUSG00000003279	Dlgap1	ortholog_one2one
ENSG00000170579	ENST00000315677	DLGAP1	ENSMUSG00000003279	Dlgap1	ortholog_one2one
ENSG00000170579	ENST00000534970	DLGAP1	ENSMUSG00000003279	Dlgap1	ortholog_one2one
ENSG00000170579	ENST00000539435	DLGAP1	ENSMUSG00000003279	Dlgap1	ortholog_one2one
ENSG00000170579	ENST00000581699	DLGAP1	ENSMUSG00000003279	Dlgap1	ortholog_one2one
ENSG00000170579	ENST00000400145	DLGAP1	ENSMUSG00000003279	Dlgap1	ortholog_one2one
ENSG00000170579	ENST00000581527	DLGAP1	ENSMUSG00000003279	Dlgap1	ortholog_one2one
ENSG00000170579	ENST00000485480	DLGAP1	ENSMUSG00000003279	Dlgap1	ortholog_one2one
ENSG00000170579	ENST00000498188	DLGAP1	ENSMUSG00000003279	Dlgap1	ortholog_one2one
ENSG00000170579	ENST00000478161	DLGAP1	ENSMUSG00000003279	Dlgap1	ortholog_one2one
ENSG00000170579	ENST00000486430	DLGAP1	ENSMUSG00000003279	Dlgap1	ortholog_one2one
ENSG00000170579	ENST00000484845	DLGAP1	ENSMUSG00000003279	Dlgap1	ortholog_one2one
ENSG00000170579	ENST00000581550	DLGAP1	ENSMUSG00000003279	Dlgap1	ortholog_one2one
ENSG00000170579	ENST00000582051	DLGAP1	ENSMUSG00000003279	Dlgap1	ortholog_one2one
ENSG00000170579	ENST00000578250	DLGAP1	ENSMUSG00000003279	Dlgap1	ortholog_one2one
ENSG00000170579	ENST00000577430	DLGAP1	ENSMUSG00000003279	Dlgap1	ortholog_one2one
ENSG00000170579	ENST00000579652	DLGAP1	ENSMUSG00000003279	Dlgap1	ortholog_one2one
ENSG00000170579	ENST00000515196	DLGAP1	ENSMUSG00000003279	Dlgap1	ortholog_one2one
ENSG00000170579	ENST00000639615	DLGAP1	ENSMUSG00000003279	Dlgap1	ortholog_one2one
ENSG00000172794	ENST00000340415	RAB37	ENSMUSG00000020732	Rab37	ortholog_one2one
ENSG00000172794	ENST00000402449	RAB37	ENSMUSG00000020732	Rab37	ortholog_one2one
ENSG00000172794	ENST00000392617	RAB37	ENSMUSG00000020732	Rab37	ortholog_one2one
ENSG00000172794	ENST00000528438	RAB37	ENSMUSG00000020732	Rab37	ortholog_one2one
ENSG00000172794	ENST00000392615	RAB37	ENSMUSG00000020732	Rab37	ortholog_one2one
ENSG00000172794	ENST00000392614	RAB37	ENSMUSG00000020732	Rab37	ortholog_one2one
ENSG00000172794	ENST00000392613	RAB37	ENSMUSG00000020732	Rab37	ortholog_one2one
ENSG00000172794	ENST00000533530	RAB37	ENSMUSG00000020732	Rab37	ortholog_one2one
ENSG00000172794	ENST00000527040	RAB37	ENSMUSG00000020732	Rab37	ortholog_one2one
ENSG00000172794	ENST00000577548	RAB37	ENSMUSG00000020732	Rab37	ortholog_one2one
ENSG00000172794	ENST00000392612	RAB37	ENSMUSG00000020732	Rab37	ortholog_one2one
ENSG00000172794	ENST00000392610	RAB37	ENSMUSG00000020732	Rab37	ortholog_one2one
ENSG00000172794	ENST00000481224	RAB37	ENSMUSG00000020732	Rab37	ortholog_one2one
ENSG00000172794	ENST00000488977	RAB37	ENSMUSG00000020732	Rab37	ortholog_one2one
ENSG00000172794	ENST00000531420	RAB37	ENSMUSG00000020732	Rab37	ortholog_one2one
ENSG00000172794	ENST00000613645	RAB37	ENSMUSG00000020732	Rab37	ortholog_one2one
ENSG00000090581	ENST00000204679	GNPTG	ENSMUSG00000035521	Gnptg	ortholog_one2one
ENSG00000090581	ENST00000526820	GNPTG	ENSMUSG00000035521	Gnptg	ortholog_one2one
ENSG00000090581	ENST00000527876	GNPTG	ENSMUSG00000035521	Gnptg	ortholog_one2one
ENSG00000090581	ENST00000529957	GNPTG	ENSMUSG00000035521	Gnptg	ortholog_one2one
ENSG00000090581	ENST00000534197	GNPTG	ENSMUSG00000035521	Gnptg	ortholog_one2one
ENSG00000090581	ENST00000527137	GNPTG	ENSMUSG00000035521	Gnptg	ortholog_one2one
ENSG00000090581	ENST00000527168	GNPTG	ENSMUSG00000035521	Gnptg	ortholog_one2one
ENSG00000090581	ENST00000529110	GNPTG	ENSMUSG00000035521	Gnptg	ortholog_one2one
ENSG00000090581	ENST00000527076	GNPTG	ENSMUSG00000035521	Gnptg	ortholog_one2one
ENSG00000005810	ENST00000544440	MYCBP2	ENSMUSG00000033004	Mycbp2	ortholog_one2one
ENSG00000005810	ENST00000429715	MYCBP2	ENSMUSG00000033004	Mycbp2	ortholog_one2one
ENSG00000005810	ENST00000485061	MYCBP2	ENSMUSG00000033004	Mycbp2	ortholog_one2one
ENSG00000005810	ENST00000482517	MYCBP2	ENSMUSG00000033004	Mycbp2	ortholog_one2one
ENSG00000005810	ENST00000462987	MYCBP2	ENSMUSG00000033004	Mycbp2	ortholog_one2one
ENSG00000005810	ENST00000498073	MYCBP2	ENSMUSG00000033004	Mycbp2	ortholog_one2one
ENSG00000005810	ENST00000466564	MYCBP2	ENSMUSG00000033004	Mycbp2	ortholog_one2one
ENSG00000005810	ENST00000486679	MYCBP2	ENSMUSG00000033004	Mycbp2	ortholog_one2one
ENSG00000005810	ENST00000474882	MYCBP2	ENSMUSG00000033004	Mycbp2	ortholog_one2one
ENSG00000005810	ENST00000491491	MYCBP2	ENSMUSG00000033004	Mycbp2	ortholog_one2one
ENSG00000005810	ENST00000357337	MYCBP2	ENSMUSG00000033004	Mycbp2	ortholog_one2one
ENSG00000005810	ENST00000612956	MYCBP2	ENSMUSG00000033004	Mycbp2	ortholog_one2one
ENSG00000068120	ENST00000588757	COASY	ENSMUSG00000001755	Coasy	ortholog_one2one
ENSG00000068120	ENST00000585811	COASY	ENSMUSG00000001755	Coasy	ortholog_one2one
ENSG00000068120	ENST00000585909	COASY	ENSMUSG00000001755	Coasy	ortholog_one2one
ENSG00000068120	ENST00000586771	COASY	ENSMUSG00000001755	Coasy	ortholog_one2one
ENSG00000068120	ENST00000421097	COASY	ENSMUSG00000001755	Coasy	ortholog_one2one
ENSG00000068120	ENST00000591779	COASY	ENSMUSG00000001755	Coasy	ortholog_one2one
ENSG00000068120	ENST00000587858	COASY	ENSMUSG00000001755	Coasy	ortholog_one2one
ENSG00000068120	ENST00000587214	COASY	ENSMUSG00000001755	Coasy	ortholog_one2one
ENSG00000068120	ENST00000587157	COASY	ENSMUSG00000001755	Coasy	ortholog_one2one
ENSG00000068120	ENST00000590958	COASY	ENSMUSG00000001755	Coasy	ortholog_one2one
ENSG00000068120	ENST00000393818	COASY	ENSMUSG00000001755	Coasy	ortholog_one2one
ENSG00000068120	ENST00000591753	COASY	ENSMUSG00000001755	Coasy	ortholog_one2one
ENSG00000068120	ENST00000588353	COASY	ENSMUSG00000001755	Coasy	ortholog_one2one
ENSG00000068120	ENST00000591583	COASY	ENSMUSG00000001755	Coasy	ortholog_one2one
ENSG00000204899	ENST00000377818	MZT1	ENSMUSG00000033186	Mzt1	ortholog_one2one
ENSG00000188343	ENST00000523475	FAM92A	ENSMUSG00000028218	Fam92a	ortholog_one2one
ENSG00000188343	ENST00000518829	FAM92A	ENSMUSG00000028218	Fam92a	ortholog_one2one
ENSG00000188343	ENST00000452913	FAM92A	ENSMUSG00000028218	Fam92a	ortholog_one2one
ENSG00000188343	ENST00000518322	FAM92A	ENSMUSG00000028218	Fam92a	ortholog_one2one
ENSG00000188343	ENST00000522324	FAM92A	ENSMUSG00000028218	Fam92a	ortholog_one2one
ENSG00000188343	ENST00000523577	FAM92A	ENSMUSG00000028218	Fam92a	ortholog_one2one
ENSG00000188343	ENST00000359421	FAM92A	ENSMUSG00000028218	Fam92a	ortholog_one2one
ENSG00000188343	ENST00000522803	FAM92A	ENSMUSG00000028218	Fam92a	ortholog_one2one
ENSG00000188343	ENST00000423990	FAM92A	ENSMUSG00000028218	Fam92a	ortholog_one2one
ENSG00000188343	ENST00000520937	FAM92A	ENSMUSG00000028218	Fam92a	ortholog_one2one
ENSG00000188343	ENST00000518116	FAM92A	ENSMUSG00000028218	Fam92a	ortholog_one2one
ENSG00000188343	ENST00000523453	FAM92A	ENSMUSG00000028218	Fam92a	ortholog_one2one
ENSG00000188343	ENST00000520955	FAM92A	ENSMUSG00000028218	Fam92a	ortholog_one2one
ENSG00000188343	ENST00000519135	FAM92A	ENSMUSG00000028218	Fam92a	ortholog_one2one
ENSG00000188343	ENST00000517718	FAM92A	ENSMUSG00000028218	Fam92a	ortholog_one2one
ENSG00000188343	ENST00000521641	FAM92A	ENSMUSG00000028218	Fam92a	ortholog_one2one
ENSG00000188343	ENST00000519679	FAM92A	ENSMUSG00000028218	Fam92a	ortholog_one2one
ENSG00000188343	ENST00000520363	FAM92A	ENSMUSG00000028218	Fam92a	ortholog_one2one
ENSG00000188343	ENST00000620645	FAM92A	ENSMUSG00000028218	Fam92a	ortholog_one2one
ENSG00000168904	ENST00000558879	LRRC28	ENSMUSG00000030556	Lrrc28	ortholog_one2one
ENSG00000168904	ENST00000301981	LRRC28	ENSMUSG00000030556	Lrrc28	ortholog_one2one
ENSG00000168904	ENST00000559399	LRRC28	ENSMUSG00000030556	Lrrc28	ortholog_one2one
ENSG00000168904	ENST00000560213	LRRC28	ENSMUSG00000030556	Lrrc28	ortholog_one2one
ENSG00000168904	ENST00000559433	LRRC28	ENSMUSG00000030556	Lrrc28	ortholog_one2one
ENSG00000168904	ENST00000558471	LRRC28	ENSMUSG00000030556	Lrrc28	ortholog_one2one
ENSG00000168904	ENST00000561253	LRRC28	ENSMUSG00000030556	Lrrc28	ortholog_one2one
ENSG00000168904	ENST00000558500	LRRC28	ENSMUSG00000030556	Lrrc28	ortholog_one2one
ENSG00000168904	ENST00000447360	LRRC28	ENSMUSG00000030556	Lrrc28	ortholog_one2one
ENSG00000168904	ENST00000558172	LRRC28	ENSMUSG00000030556	Lrrc28	ortholog_one2one
ENSG00000168904	ENST00000561276	LRRC28	ENSMUSG00000030556	Lrrc28	ortholog_one2one
ENSG00000168904	ENST00000331450	LRRC28	ENSMUSG00000030556	Lrrc28	ortholog_one2one
ENSG00000168904	ENST00000558861	LRRC28	ENSMUSG00000030556	Lrrc28	ortholog_one2one
ENSG00000168904	ENST00000558771	LRRC28	ENSMUSG00000030556	Lrrc28	ortholog_one2one
ENSG00000168904	ENST00000558248	LRRC28	ENSMUSG00000030556	Lrrc28	ortholog_one2one
ENSG00000168904	ENST00000558890	LRRC28	ENSMUSG00000030556	Lrrc28	ortholog_one2one
ENSG00000168904	ENST00000559819	LRRC28	ENSMUSG00000030556	Lrrc28	ortholog_one2one
ENSG00000168904	ENST00000559774	LRRC28	ENSMUSG00000030556	Lrrc28	ortholog_one2one
ENSG00000168904	ENST00000558911	LRRC28	ENSMUSG00000030556	Lrrc28	ortholog_one2one
ENSG00000168904	ENST00000560483	LRRC28	ENSMUSG00000030556	Lrrc28	ortholog_one2one
ENSG00000168904	ENST00000560236	LRRC28	ENSMUSG00000030556	Lrrc28	ortholog_one2one
ENSG00000168904	ENST00000561431	LRRC28	ENSMUSG00000030556	Lrrc28	ortholog_one2one
ENSG00000116017	ENST00000585895	ARID3A	ENSMUSG00000019564	Arid3a	ortholog_one2one
ENSG00000116017	ENST00000263620	ARID3A	ENSMUSG00000019564	Arid3a	ortholog_one2one
ENSG00000116017	ENST00000592216	ARID3A	ENSMUSG00000019564	Arid3a	ortholog_one2one
ENSG00000116017	ENST00000587532	ARID3A	ENSMUSG00000019564	Arid3a	ortholog_one2one
ENSG00000116017	ENST00000457152	ARID3A	ENSMUSG00000019564	Arid3a	ortholog_one2one
ENSG00000116017	ENST00000585733	ARID3A	ENSMUSG00000019564	Arid3a	ortholog_one2one
ENSG00000116017	ENST00000590749	ARID3A	ENSMUSG00000019564	Arid3a	ortholog_one2one
ENSG00000136866	ENST00000374227	ZFP37	ENSMUSG00000028389	Zfp37	ortholog_one2one
ENSG00000136866	ENST00000555206	ZFP37	ENSMUSG00000028389	Zfp37	ortholog_one2one
ENSG00000136866	ENST00000553380	ZFP37	ENSMUSG00000028389	Zfp37	ortholog_one2one
ENSG00000002822	ENST00000481633	MAD1L1	ENSMUSG00000029554	Mad1l1	ortholog_one2one
ENSG00000002822	ENST00000402746	MAD1L1	ENSMUSG00000029554	Mad1l1	ortholog_one2one
ENSG00000002822	ENST00000399654	MAD1L1	ENSMUSG00000029554	Mad1l1	ortholog_one2one
ENSG00000002822	ENST00000406869	MAD1L1	ENSMUSG00000029554	Mad1l1	ortholog_one2one
ENSG00000002822	ENST00000468372	MAD1L1	ENSMUSG00000029554	Mad1l1	ortholog_one2one
ENSG00000002822	ENST00000496548	MAD1L1	ENSMUSG00000029554	Mad1l1	ortholog_one2one
ENSG00000002822	ENST00000477172	MAD1L1	ENSMUSG00000029554	Mad1l1	ortholog_one2one
ENSG00000002822	ENST00000450235	MAD1L1	ENSMUSG00000029554	Mad1l1	ortholog_one2one
ENSG00000002822	ENST00000437877	MAD1L1	ENSMUSG00000029554	Mad1l1	ortholog_one2one
ENSG00000002822	ENST00000438959	MAD1L1	ENSMUSG00000029554	Mad1l1	ortholog_one2one
ENSG00000002822	ENST00000444373	MAD1L1	ENSMUSG00000029554	Mad1l1	ortholog_one2one
ENSG00000002822	ENST00000421113	MAD1L1	ENSMUSG00000029554	Mad1l1	ortholog_one2one
ENSG00000002822	ENST00000483165	MAD1L1	ENSMUSG00000029554	Mad1l1	ortholog_one2one
ENSG00000002822	ENST00000491858	MAD1L1	ENSMUSG00000029554	Mad1l1	ortholog_one2one
ENSG00000002822	ENST00000464742	MAD1L1	ENSMUSG00000029554	Mad1l1	ortholog_one2one
ENSG00000002822	ENST00000459731	MAD1L1	ENSMUSG00000029554	Mad1l1	ortholog_one2one
ENSG00000002822	ENST00000486340	MAD1L1	ENSMUSG00000029554	Mad1l1	ortholog_one2one
ENSG00000002822	ENST00000469871	MAD1L1	ENSMUSG00000029554	Mad1l1	ortholog_one2one
ENSG00000002822	ENST00000445959	MAD1L1	ENSMUSG00000029554	Mad1l1	ortholog_one2one
ENSG00000002822	ENST00000429625	MAD1L1	ENSMUSG00000029554	Mad1l1	ortholog_one2one
ENSG00000002822	ENST00000455998	MAD1L1	ENSMUSG00000029554	Mad1l1	ortholog_one2one
ENSG00000002822	ENST00000429779	MAD1L1	ENSMUSG00000029554	Mad1l1	ortholog_one2one
ENSG00000002822	ENST00000265854	MAD1L1	ENSMUSG00000029554	Mad1l1	ortholog_one2one
ENSG00000154438	ENST00000284629	ASZ1	ENSMUSG00000010796	Asz1	ortholog_one2one
ENSG00000154438	ENST00000463182	ASZ1	ENSMUSG00000010796	Asz1	ortholog_one2one
ENSG00000154438	ENST00000479454	ASZ1	ENSMUSG00000010796	Asz1	ortholog_one2one
ENSG00000154438	ENST00000465832	ASZ1	ENSMUSG00000010796	Asz1	ortholog_one2one
ENSG00000154438	ENST00000450714	ASZ1	ENSMUSG00000010796	Asz1	ortholog_one2one
ENSG00000154438	ENST00000428663	ASZ1	ENSMUSG00000010796	Asz1	ortholog_one2one
ENSG00000083520	ENST00000377767	DIS3	ENSMUSG00000033166	Dis3	ortholog_one2one
ENSG00000083520	ENST00000377780	DIS3	ENSMUSG00000033166	Dis3	ortholog_one2one
ENSG00000083520	ENST00000490646	DIS3	ENSMUSG00000033166	Dis3	ortholog_one2one
ENSG00000083520	ENST00000475871	DIS3	ENSMUSG00000033166	Dis3	ortholog_one2one
ENSG00000083520	ENST00000545453	DIS3	ENSMUSG00000033166	Dis3	ortholog_one2one
ENSG00000147419	ENST00000356537	CCDC25	ENSMUSG00000022035	Ccdc25	ortholog_one2one
ENSG00000147419	ENST00000520486	CCDC25	ENSMUSG00000022035	Ccdc25	ortholog_one2one
ENSG00000147419	ENST00000520202	CCDC25	ENSMUSG00000022035	Ccdc25	ortholog_one2one
ENSG00000147419	ENST00000523841	CCDC25	ENSMUSG00000022035	Ccdc25	ortholog_one2one
ENSG00000147419	ENST00000519509	CCDC25	ENSMUSG00000022035	Ccdc25	ortholog_one2one
ENSG00000147419	ENST00000522915	CCDC25	ENSMUSG00000022035	Ccdc25	ortholog_one2one
ENSG00000147419	ENST00000521220	CCDC25	ENSMUSG00000022035	Ccdc25	ortholog_one2one
ENSG00000147419	ENST00000524084	CCDC25	ENSMUSG00000022035	Ccdc25	ortholog_one2one
ENSG00000147419	ENST00000519299	CCDC25	ENSMUSG00000022035	Ccdc25	ortholog_one2one
ENSG00000147419	ENST00000519843	CCDC25	ENSMUSG00000022035	Ccdc25	ortholog_one2one
ENSG00000147419	ENST00000517979	CCDC25	ENSMUSG00000022035	Ccdc25	ortholog_one2one
ENSG00000147419	ENST00000640944	CCDC25	ENSMUSG00000022035	Ccdc25	ortholog_one2one
ENSG00000187017	ENST00000645284	ESPN	ENSMUSG00000028943	Espn	ortholog_one2one
ENSG00000187017	ENST00000636330	ESPN	ENSMUSG00000028943	Espn	ortholog_one2one
ENSG00000187017	ENST00000377828	ESPN	ENSMUSG00000028943	Espn	ortholog_one2one
ENSG00000187017	ENST00000633651	ESPN	ENSMUSG00000028943	Espn	ortholog_one2one
ENSG00000187017	ENST00000632142	ESPN	ENSMUSG00000028943	Espn	ortholog_one2one
ENSG00000187017	ENST00000418286	ESPN	ENSMUSG00000028943	Espn	ortholog_one2one
ENSG00000187017	ENST00000632803	ESPN	ENSMUSG00000028943	Espn	ortholog_one2one
ENSG00000187017	ENST00000632593	ESPN	ENSMUSG00000028943	Espn	ortholog_one2one
ENSG00000187017	ENST00000461727	ESPN	ENSMUSG00000028943	Espn	ortholog_one2one
ENSG00000187017	ENST00000475228	ESPN	ENSMUSG00000028943	Espn	ortholog_one2one
ENSG00000187017	ENST00000478323	ESPN	ENSMUSG00000028943	Espn	ortholog_one2one
ENSG00000187017	ENST00000633239	ESPN	ENSMUSG00000028943	Espn	ortholog_one2one
ENSG00000187017	ENST00000475479	ESPN	ENSMUSG00000028943	Espn	ortholog_one2one
ENSG00000187017	ENST00000636644	ESPN	ENSMUSG00000028943	Espn	ortholog_one2one
ENSG00000187017	ENST00000434576	ESPN	ENSMUSG00000028943	Espn	ortholog_one2one
ENSG00000187017	ENST00000477679	ESPN	ENSMUSG00000028943	Espn	ortholog_one2one
ENSG00000187017	ENST00000468561	ESPN	ENSMUSG00000028943	Espn	ortholog_one2one
ENSG00000187017	ENST00000416731	ESPN	ENSMUSG00000028943	Espn	ortholog_one2one
ENSG00000110321	ENST00000526148	EIF4G2	ENSMUSG00000005610	Eif4g2	ortholog_one2one
ENSG00000110321	ENST00000525681	EIF4G2	ENSMUSG00000005610	Eif4g2	ortholog_one2one
ENSG00000110321	ENST00000532383	EIF4G2	ENSMUSG00000005610	Eif4g2	ortholog_one2one
ENSG00000110321	ENST00000339995	EIF4G2	ENSMUSG00000005610	Eif4g2	ortholog_one2one
ENSG00000110321	ENST00000396525	EIF4G2	ENSMUSG00000005610	Eif4g2	ortholog_one2one
ENSG00000110321	ENST00000532120	EIF4G2	ENSMUSG00000005610	Eif4g2	ortholog_one2one
ENSG00000110321	ENST00000525606	EIF4G2	ENSMUSG00000005610	Eif4g2	ortholog_one2one
ENSG00000110321	ENST00000534470	EIF4G2	ENSMUSG00000005610	Eif4g2	ortholog_one2one
ENSG00000110321	ENST00000534272	EIF4G2	ENSMUSG00000005610	Eif4g2	ortholog_one2one
ENSG00000110321	ENST00000528839	EIF4G2	ENSMUSG00000005610	Eif4g2	ortholog_one2one
ENSG00000110321	ENST00000531180	EIF4G2	ENSMUSG00000005610	Eif4g2	ortholog_one2one
ENSG00000110321	ENST00000530564	EIF4G2	ENSMUSG00000005610	Eif4g2	ortholog_one2one
ENSG00000110321	ENST00000531416	EIF4G2	ENSMUSG00000005610	Eif4g2	ortholog_one2one
ENSG00000110321	ENST00000531647	EIF4G2	ENSMUSG00000005610	Eif4g2	ortholog_one2one
ENSG00000110321	ENST00000532082	EIF4G2	ENSMUSG00000005610	Eif4g2	ortholog_one2one
ENSG00000110321	ENST00000532349	EIF4G2	ENSMUSG00000005610	Eif4g2	ortholog_one2one
ENSG00000110321	ENST00000524932	EIF4G2	ENSMUSG00000005610	Eif4g2	ortholog_one2one
ENSG00000110321	ENST00000527015	EIF4G2	ENSMUSG00000005610	Eif4g2	ortholog_one2one
ENSG00000110321	ENST00000534605	EIF4G2	ENSMUSG00000005610	Eif4g2	ortholog_one2one
ENSG00000110321	ENST00000532152	EIF4G2	ENSMUSG00000005610	Eif4g2	ortholog_one2one
ENSG00000110321	ENST00000527419	EIF4G2	ENSMUSG00000005610	Eif4g2	ortholog_one2one
ENSG00000110321	ENST00000531507	EIF4G2	ENSMUSG00000005610	Eif4g2	ortholog_one2one
ENSG00000110321	ENST00000525972	EIF4G2	ENSMUSG00000005610	Eif4g2	ortholog_one2one
ENSG00000110321	ENST00000528562	EIF4G2	ENSMUSG00000005610	Eif4g2	ortholog_one2one
ENSG00000110321	ENST00000532570	EIF4G2	ENSMUSG00000005610	Eif4g2	ortholog_one2one
ENSG00000110321	ENST00000530211	EIF4G2	ENSMUSG00000005610	Eif4g2	ortholog_one2one
ENSG00000110321	ENST00000527526	EIF4G2	ENSMUSG00000005610	Eif4g2	ortholog_one2one
ENSG00000110321	ENST00000530702	EIF4G2	ENSMUSG00000005610	Eif4g2	ortholog_one2one
ENSG00000110321	ENST00000525995	EIF4G2	ENSMUSG00000005610	Eif4g2	ortholog_one2one
ENSG00000110321	ENST00000533485	EIF4G2	ENSMUSG00000005610	Eif4g2	ortholog_one2one
ENSG00000110321	ENST00000534246	EIF4G2	ENSMUSG00000005610	Eif4g2	ortholog_one2one
ENSG00000110321	ENST00000640650	EIF4G2	ENSMUSG00000005610	Eif4g2	ortholog_one2one
ENSG00000105939	ENST00000242351	ZC3HAV1	ENSMUSG00000029826	Zc3hav1	ortholog_one2one
ENSG00000105939	ENST00000464606	ZC3HAV1	ENSMUSG00000029826	Zc3hav1	ortholog_one2one
ENSG00000105939	ENST00000460845	ZC3HAV1	ENSMUSG00000029826	Zc3hav1	ortholog_one2one
ENSG00000105939	ENST00000471652	ZC3HAV1	ENSMUSG00000029826	Zc3hav1	ortholog_one2one
ENSG00000169410	ENST00000618819	PTPN9	ENSMUSG00000032290	Ptpn9	ortholog_one2one
ENSG00000169410	ENST00000568108	PTPN9	ENSMUSG00000032290	Ptpn9	ortholog_one2one
ENSG00000169410	ENST00000563835	PTPN9	ENSMUSG00000032290	Ptpn9	ortholog_one2one
ENSG00000169410	ENST00000564970	PTPN9	ENSMUSG00000032290	Ptpn9	ortholog_one2one
ENSG00000169410	ENST00000561731	PTPN9	ENSMUSG00000032290	Ptpn9	ortholog_one2one
ENSG00000169410	ENST00000306726	PTPN9	ENSMUSG00000032290	Ptpn9	ortholog_one2one
ENSG00000263264	ENST00000576789	AC119396.1	ENSMUSG00000074497	A430078G23Rik	ortholog_one2one
ENSG00000164037	ENST00000394789	SLC9B1	ENSMUSG00000050150	Slc9b1	ortholog_one2one
ENSG00000164037	ENST00000503584	SLC9B1	ENSMUSG00000050150	Slc9b1	ortholog_one2one
ENSG00000164037	ENST00000514972	SLC9B1	ENSMUSG00000050150	Slc9b1	ortholog_one2one
ENSG00000164037	ENST00000296422	SLC9B1	ENSMUSG00000050150	Slc9b1	ortholog_one2one
ENSG00000164037	ENST00000504216	SLC9B1	ENSMUSG00000050150	Slc9b1	ortholog_one2one
ENSG00000164037	ENST00000509614	SLC9B1	ENSMUSG00000050150	Slc9b1	ortholog_one2one
ENSG00000164037	ENST00000512651	SLC9B1	ENSMUSG00000050150	Slc9b1	ortholog_one2one
ENSG00000164037	ENST00000511253	SLC9B1	ENSMUSG00000050150	Slc9b1	ortholog_one2one
ENSG00000164037	ENST00000510243	SLC9B1	ENSMUSG00000050150	Slc9b1	ortholog_one2one
ENSG00000164037	ENST00000514340	SLC9B1	ENSMUSG00000050150	Slc9b1	ortholog_one2one
ENSG00000164037	ENST00000510559	SLC9B1	ENSMUSG00000050150	Slc9b1	ortholog_one2one
ENSG00000268651	ENST00000599837	CTAG1A	ENSMUSG00000079536	Gm6880	ortholog_many2many
ENSG00000268651	ENST00000593606	CTAG1A	ENSMUSG00000079536	Gm6880	ortholog_many2many
ENSG00000268651	ENST00000599837	CTAG1A	ENSMUSG00000031181	Ctag2	ortholog_many2many
ENSG00000268651	ENST00000593606	CTAG1A	ENSMUSG00000031181	Ctag2	ortholog_many2many
ENSG00000268651	ENST00000599837	CTAG1A	ENSMUSG00000079532	Gm6890	ortholog_many2many
ENSG00000268651	ENST00000593606	CTAG1A	ENSMUSG00000079532	Gm6890	ortholog_many2many
ENSG00000134765	ENST00000257197	DSC1	ENSMUSG00000044322	Dsc1	ortholog_one2one
ENSG00000134765	ENST00000257198	DSC1	ENSMUSG00000044322	Dsc1	ortholog_one2one
ENSG00000197746	ENST00000394936	PSAP	ENSMUSG00000004207	Psap	ortholog_one2one
ENSG00000197746	ENST00000495196	PSAP	ENSMUSG00000004207	Psap	ortholog_one2one
ENSG00000197746	ENST00000493143	PSAP	ENSMUSG00000004207	Psap	ortholog_one2one
ENSG00000197746	ENST00000633965	PSAP	ENSMUSG00000004207	Psap	ortholog_one2one
ENSG00000197746	ENST00000610929	PSAP	ENSMUSG00000004207	Psap	ortholog_one2one
ENSG00000197746	ENST00000394934	PSAP	ENSMUSG00000004207	Psap	ortholog_one2one
ENSG00000268861	ENST00000617428	AC008878.3	ENSMUSG00000004568	Arhgef18	ortholog_one2many
ENSG00000145526	ENST00000510297	CDH18	ENSMUSG00000040420	Cdh18	ortholog_one2one
ENSG00000145526	ENST00000382275	CDH18	ENSMUSG00000040420	Cdh18	ortholog_one2one
ENSG00000145526	ENST00000507958	CDH18	ENSMUSG00000040420	Cdh18	ortholog_one2one
ENSG00000145526	ENST00000506372	CDH18	ENSMUSG00000040420	Cdh18	ortholog_one2one
ENSG00000145526	ENST00000502796	CDH18	ENSMUSG00000040420	Cdh18	ortholog_one2one
ENSG00000145526	ENST00000515257	CDH18	ENSMUSG00000040420	Cdh18	ortholog_one2one
ENSG00000145526	ENST00000511273	CDH18	ENSMUSG00000040420	Cdh18	ortholog_one2one
ENSG00000145526	ENST00000508350	CDH18	ENSMUSG00000040420	Cdh18	ortholog_one2one
ENSG00000145526	ENST00000511423	CDH18	ENSMUSG00000040420	Cdh18	ortholog_one2one
ENSG00000145526	ENST00000507632	CDH18	ENSMUSG00000040420	Cdh18	ortholog_one2one
ENSG00000145526	ENST00000503132	CDH18	ENSMUSG00000040420	Cdh18	ortholog_one2one
ENSG00000145526	ENST00000274170	CDH18	ENSMUSG00000040420	Cdh18	ortholog_one2one
ENSG00000183439	ENST00000329314	TRIM61	ENSMUSG00000109718	Trim61	ortholog_one2one
ENSG00000205899	ENST00000391429	BHLHA9	ENSMUSG00000044243	Bhlha9	ortholog_one2one
ENSG00000186976	ENST00000461800	EFCAB6	ENSMUSG00000022441	Efcab6	ortholog_one2one
ENSG00000186976	ENST00000396231	EFCAB6	ENSMUSG00000022441	Efcab6	ortholog_one2one
ENSG00000186976	ENST00000262726	EFCAB6	ENSMUSG00000022441	Efcab6	ortholog_one2one
ENSG00000186976	ENST00000483324	EFCAB6	ENSMUSG00000022441	Efcab6	ortholog_one2one
ENSG00000186976	ENST00000477145	EFCAB6	ENSMUSG00000022441	Efcab6	ortholog_one2one
ENSG00000186976	ENST00000468552	EFCAB6	ENSMUSG00000022441	Efcab6	ortholog_one2one
ENSG00000186976	ENST00000404038	EFCAB6	ENSMUSG00000022441	Efcab6	ortholog_one2one
ENSG00000186976	ENST00000356087	EFCAB6	ENSMUSG00000022441	Efcab6	ortholog_one2one
ENSG00000186976	ENST00000476600	EFCAB6	ENSMUSG00000022441	Efcab6	ortholog_one2one
ENSG00000186976	ENST00000485142	EFCAB6	ENSMUSG00000022441	Efcab6	ortholog_one2one
ENSG00000004939	ENST00000262418	SLC4A1	ENSMUSG00000006574	Slc4a1	ortholog_one2one
ENSG00000004939	ENST00000471005	SLC4A1	ENSMUSG00000006574	Slc4a1	ortholog_one2one
ENSG00000004939	ENST00000498270	SLC4A1	ENSMUSG00000006574	Slc4a1	ortholog_one2one
ENSG00000004939	ENST00000399246	SLC4A1	ENSMUSG00000006574	Slc4a1	ortholog_one2one
ENSG00000004939	ENST00000631130	SLC4A1	ENSMUSG00000006574	Slc4a1	ortholog_one2one
ENSG00000204161	ENST00000374156	TMEM273	ENSMUSG00000041707	Tmem273	ortholog_one2one
ENSG00000204161	ENST00000374153	TMEM273	ENSMUSG00000041707	Tmem273	ortholog_one2one
ENSG00000204161	ENST00000488276	TMEM273	ENSMUSG00000041707	Tmem273	ortholog_one2one
ENSG00000204161	ENST00000474718	TMEM273	ENSMUSG00000041707	Tmem273	ortholog_one2one
ENSG00000204161	ENST00000453436	TMEM273	ENSMUSG00000041707	Tmem273	ortholog_one2one
ENSG00000204161	ENST00000374148	TMEM273	ENSMUSG00000041707	Tmem273	ortholog_one2one
ENSG00000204161	ENST00000470884	TMEM273	ENSMUSG00000041707	Tmem273	ortholog_one2one
ENSG00000204161	ENST00000374151	TMEM273	ENSMUSG00000041707	Tmem273	ortholog_one2one
ENSG00000131386	ENST00000339732	GALNT15	ENSMUSG00000021903	Galnt15	ortholog_one2one
ENSG00000131386	ENST00000437509	GALNT15	ENSMUSG00000021903	Galnt15	ortholog_one2one
ENSG00000131386	ENST00000470031	GALNT15	ENSMUSG00000021903	Galnt15	ortholog_one2one
ENSG00000131386	ENST00000430410	GALNT15	ENSMUSG00000021903	Galnt15	ortholog_one2one
ENSG00000131386	ENST00000489467	GALNT15	ENSMUSG00000021903	Galnt15	ortholog_one2one
ENSG00000131386	ENST00000650034	GALNT15	ENSMUSG00000021903	Galnt15	ortholog_one2one
ENSG00000131386	ENST00000617544	GALNT15	ENSMUSG00000021903	Galnt15	ortholog_one2one
ENSG00000007520	ENST00000007390	TSR3	ENSMUSG00000015126	Tsr3	ortholog_one2one
ENSG00000007520	ENST00000566296	TSR3	ENSMUSG00000015126	Tsr3	ortholog_one2one
ENSG00000140279	ENST00000389039	DUOX2	ENSMUSG00000068452	Duox2	ortholog_one2one
ENSG00000140279	ENST00000558383	DUOX2	ENSMUSG00000068452	Duox2	ortholog_one2one
ENSG00000140279	ENST00000560797	DUOX2	ENSMUSG00000068452	Duox2	ortholog_one2one
ENSG00000140279	ENST00000558416	DUOX2	ENSMUSG00000068452	Duox2	ortholog_one2one
ENSG00000140279	ENST00000603300	DUOX2	ENSMUSG00000068452	Duox2	ortholog_one2one
ENSG00000127533	ENST00000248076	F2RL3	ENSMUSG00000050147	F2rl3	ortholog_one2one
ENSG00000127533	ENST00000599210	F2RL3	ENSMUSG00000050147	F2rl3	ortholog_one2one
ENSG00000144028	ENST00000323853	SNRNP200	ENSMUSG00000003660	Snrnp200	ortholog_one2one
ENSG00000144028	ENST00000497539	SNRNP200	ENSMUSG00000003660	Snrnp200	ortholog_one2one
ENSG00000144028	ENST00000429650	SNRNP200	ENSMUSG00000003660	Snrnp200	ortholog_one2one
ENSG00000144028	ENST00000480835	SNRNP200	ENSMUSG00000003660	Snrnp200	ortholog_one2one
ENSG00000144028	ENST00000484372	SNRNP200	ENSMUSG00000003660	Snrnp200	ortholog_one2one
ENSG00000144028	ENST00000493271	SNRNP200	ENSMUSG00000003660	Snrnp200	ortholog_one2one
ENSG00000144028	ENST00000480242	SNRNP200	ENSMUSG00000003660	Snrnp200	ortholog_one2one
ENSG00000144028	ENST00000480615	SNRNP200	ENSMUSG00000003660	Snrnp200	ortholog_one2one
ENSG00000008988	ENST00000519807	RPS20	ENSMUSG00000028234	Rps20	ortholog_one2one
ENSG00000008988	ENST00000009589	RPS20	ENSMUSG00000028234	Rps20	ortholog_one2one
ENSG00000008988	ENST00000524349	RPS20	ENSMUSG00000028234	Rps20	ortholog_one2one
ENSG00000008988	ENST00000520490	RPS20	ENSMUSG00000028234	Rps20	ortholog_one2one
ENSG00000008988	ENST00000521262	RPS20	ENSMUSG00000028234	Rps20	ortholog_one2one
ENSG00000008988	ENST00000520627	RPS20	ENSMUSG00000028234	Rps20	ortholog_one2one
ENSG00000008988	ENST00000523936	RPS20	ENSMUSG00000028234	Rps20	ortholog_one2one
ENSG00000008988	ENST00000519606	RPS20	ENSMUSG00000028234	Rps20	ortholog_one2one
ENSG00000008988	ENST00000521289	RPS20	ENSMUSG00000028234	Rps20	ortholog_one2one
ENSG00000008988	ENST00000518875	RPS20	ENSMUSG00000028234	Rps20	ortholog_one2one
ENSG00000008988	ENST00000519369	RPS20	ENSMUSG00000028234	Rps20	ortholog_one2one
ENSG00000008988	ENST00000618656	RPS20	ENSMUSG00000028234	Rps20	ortholog_one2one
ENSG00000160209	ENST00000398081	PDXK	ENSMUSG00000032788	Pdxk	ortholog_one2one
ENSG00000160209	ENST00000468090	PDXK	ENSMUSG00000032788	Pdxk	ortholog_one2one
ENSG00000160209	ENST00000291565	PDXK	ENSMUSG00000032788	Pdxk	ortholog_one2one
ENSG00000160209	ENST00000398085	PDXK	ENSMUSG00000032788	Pdxk	ortholog_one2one
ENSG00000160209	ENST00000476084	PDXK	ENSMUSG00000032788	Pdxk	ortholog_one2one
ENSG00000160209	ENST00000470029	PDXK	ENSMUSG00000032788	Pdxk	ortholog_one2one
ENSG00000160209	ENST00000438837	PDXK	ENSMUSG00000032788	Pdxk	ortholog_one2one
ENSG00000160209	ENST00000498040	PDXK	ENSMUSG00000032788	Pdxk	ortholog_one2one
ENSG00000160209	ENST00000327574	PDXK	ENSMUSG00000032788	Pdxk	ortholog_one2one
ENSG00000160209	ENST00000472777	PDXK	ENSMUSG00000032788	Pdxk	ortholog_one2one
ENSG00000160209	ENST00000476313	PDXK	ENSMUSG00000032788	Pdxk	ortholog_one2one
ENSG00000160209	ENST00000481512	PDXK	ENSMUSG00000032788	Pdxk	ortholog_one2one
ENSG00000160209	ENST00000490666	PDXK	ENSMUSG00000032788	Pdxk	ortholog_one2one
ENSG00000160209	ENST00000467908	PDXK	ENSMUSG00000032788	Pdxk	ortholog_one2one
ENSG00000160209	ENST00000343528	PDXK	ENSMUSG00000032788	Pdxk	ortholog_one2one
ENSG00000160209	ENST00000398078	PDXK	ENSMUSG00000032788	Pdxk	ortholog_one2one
ENSG00000160209	ENST00000468392	PDXK	ENSMUSG00000032788	Pdxk	ortholog_one2one
ENSG00000160209	ENST00000461123	PDXK	ENSMUSG00000032788	Pdxk	ortholog_one2one
ENSG00000160209	ENST00000621478	PDXK	ENSMUSG00000032788	Pdxk	ortholog_one2one
ENSG00000221937	ENST00000408947	TAS2R40	ENSMUSG00000051917	Tas2r144	ortholog_one2one
ENSG00000163499	ENST00000392096	CRYBA2	ENSMUSG00000006546	Cryba2	ortholog_one2one
ENSG00000163499	ENST00000496566	CRYBA2	ENSMUSG00000006546	Cryba2	ortholog_one2one
ENSG00000163499	ENST00000487181	CRYBA2	ENSMUSG00000006546	Cryba2	ortholog_one2one
ENSG00000163499	ENST00000295728	CRYBA2	ENSMUSG00000006546	Cryba2	ortholog_one2one
ENSG00000163499	ENST00000453769	CRYBA2	ENSMUSG00000006546	Cryba2	ortholog_one2one
ENSG00000163499	ENST00000490678	CRYBA2	ENSMUSG00000006546	Cryba2	ortholog_one2one
ENSG00000119013	ENST00000450023	NDUFB3	ENSMUSG00000026032	Ndufb3	ortholog_one2one
ENSG00000119013	ENST00000237889	NDUFB3	ENSMUSG00000026032	Ndufb3	ortholog_one2one
ENSG00000119013	ENST00000433898	NDUFB3	ENSMUSG00000026032	Ndufb3	ortholog_one2one
ENSG00000119013	ENST00000454214	NDUFB3	ENSMUSG00000026032	Ndufb3	ortholog_one2one
ENSG00000142632	ENST00000478117	ARHGEF19	ENSMUSG00000028919	Arhgef19	ortholog_one2one
ENSG00000142632	ENST00000270747	ARHGEF19	ENSMUSG00000028919	Arhgef19	ortholog_one2one
ENSG00000142632	ENST00000449495	ARHGEF19	ENSMUSG00000028919	Arhgef19	ortholog_one2one
ENSG00000142632	ENST00000478210	ARHGEF19	ENSMUSG00000028919	Arhgef19	ortholog_one2one
ENSG00000142632	ENST00000471928	ARHGEF19	ENSMUSG00000028919	Arhgef19	ortholog_one2one
ENSG00000142632	ENST00000441785	ARHGEF19	ENSMUSG00000028919	Arhgef19	ortholog_one2one
ENSG00000169371	ENST00000567134	SNUPN	ENSMUSG00000055334	Snupn	ortholog_one2one
ENSG00000169371	ENST00000308588	SNUPN	ENSMUSG00000055334	Snupn	ortholog_one2one
ENSG00000169371	ENST00000564644	SNUPN	ENSMUSG00000055334	Snupn	ortholog_one2one
ENSG00000169371	ENST00000564675	SNUPN	ENSMUSG00000055334	Snupn	ortholog_one2one
ENSG00000169371	ENST00000567437	SNUPN	ENSMUSG00000055334	Snupn	ortholog_one2one
ENSG00000169371	ENST00000568078	SNUPN	ENSMUSG00000055334	Snupn	ortholog_one2one
ENSG00000169371	ENST00000569817	SNUPN	ENSMUSG00000055334	Snupn	ortholog_one2one
ENSG00000169371	ENST00000564086	SNUPN	ENSMUSG00000055334	Snupn	ortholog_one2one
ENSG00000169371	ENST00000568162	SNUPN	ENSMUSG00000055334	Snupn	ortholog_one2one
ENSG00000169371	ENST00000563793	SNUPN	ENSMUSG00000055334	Snupn	ortholog_one2one
ENSG00000169371	ENST00000563875	SNUPN	ENSMUSG00000055334	Snupn	ortholog_one2one
ENSG00000007516	ENST00000426824	BAIAP3	ENSMUSG00000047507	Baiap3	ortholog_one2one
ENSG00000007516	ENST00000565665	BAIAP3	ENSMUSG00000047507	Baiap3	ortholog_one2one
ENSG00000007516	ENST00000397488	BAIAP3	ENSMUSG00000047507	Baiap3	ortholog_one2one
ENSG00000007516	ENST00000562208	BAIAP3	ENSMUSG00000047507	Baiap3	ortholog_one2one
ENSG00000007516	ENST00000568887	BAIAP3	ENSMUSG00000047507	Baiap3	ortholog_one2one
ENSG00000007516	ENST00000567825	BAIAP3	ENSMUSG00000047507	Baiap3	ortholog_one2one
ENSG00000007516	ENST00000324385	BAIAP3	ENSMUSG00000047507	Baiap3	ortholog_one2one
ENSG00000007516	ENST00000421665	BAIAP3	ENSMUSG00000047507	Baiap3	ortholog_one2one
ENSG00000007516	ENST00000568198	BAIAP3	ENSMUSG00000047507	Baiap3	ortholog_one2one
ENSG00000007516	ENST00000566162	BAIAP3	ENSMUSG00000047507	Baiap3	ortholog_one2one
ENSG00000007516	ENST00000561602	BAIAP3	ENSMUSG00000047507	Baiap3	ortholog_one2one
ENSG00000007516	ENST00000561793	BAIAP3	ENSMUSG00000047507	Baiap3	ortholog_one2one
ENSG00000007516	ENST00000564213	BAIAP3	ENSMUSG00000047507	Baiap3	ortholog_one2one
ENSG00000007516	ENST00000567203	BAIAP3	ENSMUSG00000047507	Baiap3	ortholog_one2one
ENSG00000007516	ENST00000566389	BAIAP3	ENSMUSG00000047507	Baiap3	ortholog_one2one
ENSG00000007516	ENST00000628027	BAIAP3	ENSMUSG00000047507	Baiap3	ortholog_one2one
ENSG00000140632	ENST00000589389	GLYR1	ENSMUSG00000022536	Glyr1	ortholog_one2one
ENSG00000140632	ENST00000588732	GLYR1	ENSMUSG00000022536	Glyr1	ortholog_one2one
ENSG00000140632	ENST00000436648	GLYR1	ENSMUSG00000022536	Glyr1	ortholog_one2one
ENSG00000140632	ENST00000321919	GLYR1	ENSMUSG00000022536	Glyr1	ortholog_one2one
ENSG00000140632	ENST00000587936	GLYR1	ENSMUSG00000022536	Glyr1	ortholog_one2one
ENSG00000140632	ENST00000591451	GLYR1	ENSMUSG00000022536	Glyr1	ortholog_one2one
ENSG00000140632	ENST00000591846	GLYR1	ENSMUSG00000022536	Glyr1	ortholog_one2one
ENSG00000140632	ENST00000588297	GLYR1	ENSMUSG00000022536	Glyr1	ortholog_one2one
ENSG00000140632	ENST00000586095	GLYR1	ENSMUSG00000022536	Glyr1	ortholog_one2one
ENSG00000140632	ENST00000587297	GLYR1	ENSMUSG00000022536	Glyr1	ortholog_one2one
ENSG00000140632	ENST00000586901	GLYR1	ENSMUSG00000022536	Glyr1	ortholog_one2one
ENSG00000140632	ENST00000587875	GLYR1	ENSMUSG00000022536	Glyr1	ortholog_one2one
ENSG00000140632	ENST00000591159	GLYR1	ENSMUSG00000022536	Glyr1	ortholog_one2one
ENSG00000171680	ENST00000489097	PLEKHG5	ENSMUSG00000039713	Plekhg5	ortholog_one2one
ENSG00000171680	ENST00000377748	PLEKHG5	ENSMUSG00000039713	Plekhg5	ortholog_one2one
ENSG00000171680	ENST00000487949	PLEKHG5	ENSMUSG00000039713	Plekhg5	ortholog_one2one
ENSG00000171680	ENST00000377725	PLEKHG5	ENSMUSG00000039713	Plekhg5	ortholog_one2one
ENSG00000171680	ENST00000377728	PLEKHG5	ENSMUSG00000039713	Plekhg5	ortholog_one2one
ENSG00000171680	ENST00000377732	PLEKHG5	ENSMUSG00000039713	Plekhg5	ortholog_one2one
ENSG00000171680	ENST00000400915	PLEKHG5	ENSMUSG00000039713	Plekhg5	ortholog_one2one
ENSG00000171680	ENST00000377740	PLEKHG5	ENSMUSG00000039713	Plekhg5	ortholog_one2one
ENSG00000171680	ENST00000639593	PLEKHG5	ENSMUSG00000039713	Plekhg5	ortholog_one2one
ENSG00000171680	ENST00000400913	PLEKHG5	ENSMUSG00000039713	Plekhg5	ortholog_one2one
ENSG00000171680	ENST00000535355	PLEKHG5	ENSMUSG00000039713	Plekhg5	ortholog_one2one
ENSG00000171680	ENST00000340850	PLEKHG5	ENSMUSG00000039713	Plekhg5	ortholog_one2one
ENSG00000171680	ENST00000537245	PLEKHG5	ENSMUSG00000039713	Plekhg5	ortholog_one2one
ENSG00000088970	ENST00000620891	KIZ	ENSMUSG00000074749	Kiz	ortholog_one2one
ENSG00000088970	ENST00000612654	KIZ	ENSMUSG00000074749	Kiz	ortholog_one2one
ENSG00000088970	ENST00000622184	KIZ	ENSMUSG00000074749	Kiz	ortholog_one2one
ENSG00000088970	ENST00000611685	KIZ	ENSMUSG00000074749	Kiz	ortholog_one2one
ENSG00000088970	ENST00000616848	KIZ	ENSMUSG00000074749	Kiz	ortholog_one2one
ENSG00000088970	ENST00000619189	KIZ	ENSMUSG00000074749	Kiz	ortholog_one2one
ENSG00000088970	ENST00000620553	KIZ	ENSMUSG00000074749	Kiz	ortholog_one2one
ENSG00000088970	ENST00000616679	KIZ	ENSMUSG00000074749	Kiz	ortholog_one2one
ENSG00000088970	ENST00000619179	KIZ	ENSMUSG00000074749	Kiz	ortholog_one2one
ENSG00000088970	ENST00000621366	KIZ	ENSMUSG00000074749	Kiz	ortholog_one2one
ENSG00000088970	ENST00000451772	KIZ	ENSMUSG00000074749	Kiz	ortholog_one2one
ENSG00000088970	ENST00000419359	KIZ	ENSMUSG00000074749	Kiz	ortholog_one2one
ENSG00000088970	ENST00000441136	KIZ	ENSMUSG00000074749	Kiz	ortholog_one2one
ENSG00000088970	ENST00000423272	KIZ	ENSMUSG00000074749	Kiz	ortholog_one2one
ENSG00000088970	ENST00000619574	KIZ	ENSMUSG00000074749	Kiz	ortholog_one2one
ENSG00000261873	ENST00000636752	SMIM36	ENSMUSG00000110344	Gm45716	ortholog_one2one
ENSG00000261873	ENST00000572159	SMIM36	ENSMUSG00000110344	Gm45716	ortholog_one2one
ENSG00000261873	ENST00000577089	SMIM36	ENSMUSG00000110344	Gm45716	ortholog_one2one
ENSG00000115942	ENST00000234296	ORC2	ENSMUSG00000026037	Orc2	ortholog_one2one
ENSG00000115942	ENST00000464147	ORC2	ENSMUSG00000026037	Orc2	ortholog_one2one
ENSG00000115942	ENST00000487853	ORC2	ENSMUSG00000026037	Orc2	ortholog_one2one
ENSG00000115942	ENST00000474877	ORC2	ENSMUSG00000026037	Orc2	ortholog_one2one
ENSG00000115942	ENST00000467605	ORC2	ENSMUSG00000026037	Orc2	ortholog_one2one
ENSG00000115942	ENST00000410039	ORC2	ENSMUSG00000026037	Orc2	ortholog_one2one
ENSG00000115942	ENST00000457595	ORC2	ENSMUSG00000026037	Orc2	ortholog_one2one
ENSG00000083544	ENST00000484389	TDRD3	ENSMUSG00000022019	Tdrd3	ortholog_one2one
ENSG00000083544	ENST00000377894	TDRD3	ENSMUSG00000022019	Tdrd3	ortholog_one2one
ENSG00000083544	ENST00000377881	TDRD3	ENSMUSG00000022019	Tdrd3	ortholog_one2one
ENSG00000083544	ENST00000648252	TDRD3	ENSMUSG00000022019	Tdrd3	ortholog_one2one
ENSG00000083544	ENST00000377882	TDRD3	ENSMUSG00000022019	Tdrd3	ortholog_one2one
ENSG00000083544	ENST00000463109	TDRD3	ENSMUSG00000022019	Tdrd3	ortholog_one2one
ENSG00000083544	ENST00000471710	TDRD3	ENSMUSG00000022019	Tdrd3	ortholog_one2one
ENSG00000083544	ENST00000535286	TDRD3	ENSMUSG00000022019	Tdrd3	ortholog_one2one
ENSG00000083544	ENST00000196169	TDRD3	ENSMUSG00000022019	Tdrd3	ortholog_one2one
ENSG00000083544	ENST00000621840	TDRD3	ENSMUSG00000022019	Tdrd3	ortholog_one2one
ENSG00000181378	ENST00000341552	CFAP65	ENSMUSG00000047021	Cfap65	ortholog_one2one
ENSG00000181378	ENST00000413871	CFAP65	ENSMUSG00000047021	Cfap65	ortholog_one2one
ENSG00000181378	ENST00000462848	CFAP65	ENSMUSG00000047021	Cfap65	ortholog_one2one
ENSG00000181378	ENST00000474601	CFAP65	ENSMUSG00000047021	Cfap65	ortholog_one2one
ENSG00000181378	ENST00000463683	CFAP65	ENSMUSG00000047021	Cfap65	ortholog_one2one
ENSG00000181378	ENST00000409865	CFAP65	ENSMUSG00000047021	Cfap65	ortholog_one2one
ENSG00000181378	ENST00000410037	CFAP65	ENSMUSG00000047021	Cfap65	ortholog_one2one
ENSG00000181378	ENST00000457968	CFAP65	ENSMUSG00000047021	Cfap65	ortholog_one2one
ENSG00000181378	ENST00000436631	CFAP65	ENSMUSG00000047021	Cfap65	ortholog_one2one
ENSG00000181378	ENST00000295729	CFAP65	ENSMUSG00000047021	Cfap65	ortholog_one2one
ENSG00000181378	ENST00000458526	CFAP65	ENSMUSG00000047021	Cfap65	ortholog_one2one
ENSG00000181378	ENST00000453220	CFAP65	ENSMUSG00000047021	Cfap65	ortholog_one2one
ENSG00000181378	ENST00000441968	CFAP65	ENSMUSG00000047021	Cfap65	ortholog_one2one
ENSG00000284695	ENST00000506796	AC108941.2	ENSMUSG00000029272	Sult1e1	ortholog_one2many
ENSG00000109680	ENST00000513455	TBC1D19	ENSMUSG00000039178	Tbc1d19	ortholog_one2one
ENSG00000109680	ENST00000512840	TBC1D19	ENSMUSG00000039178	Tbc1d19	ortholog_one2one
ENSG00000109680	ENST00000504442	TBC1D19	ENSMUSG00000039178	Tbc1d19	ortholog_one2one
ENSG00000109680	ENST00000264866	TBC1D19	ENSMUSG00000039178	Tbc1d19	ortholog_one2one
ENSG00000109680	ENST00000502873	TBC1D19	ENSMUSG00000039178	Tbc1d19	ortholog_one2one
ENSG00000109680	ENST00000505206	TBC1D19	ENSMUSG00000039178	Tbc1d19	ortholog_one2one
ENSG00000109680	ENST00000511789	TBC1D19	ENSMUSG00000039178	Tbc1d19	ortholog_one2one
ENSG00000109680	ENST00000515568	TBC1D19	ENSMUSG00000039178	Tbc1d19	ortholog_one2one
ENSG00000109680	ENST00000513596	TBC1D19	ENSMUSG00000039178	Tbc1d19	ortholog_one2one
ENSG00000109193	ENST00000226444	SULT1E1	ENSMUSG00000029272	Sult1e1	ortholog_one2many
ENSG00000109193	ENST00000504002	SULT1E1	ENSMUSG00000029272	Sult1e1	ortholog_one2many
ENSG00000137857	ENST00000321429	DUOX1	ENSMUSG00000033268	Duox1	ortholog_one2one
ENSG00000137857	ENST00000389037	DUOX1	ENSMUSG00000033268	Duox1	ortholog_one2one
ENSG00000137857	ENST00000558322	DUOX1	ENSMUSG00000033268	Duox1	ortholog_one2one
ENSG00000137857	ENST00000561220	DUOX1	ENSMUSG00000033268	Duox1	ortholog_one2one
ENSG00000137857	ENST00000558991	DUOX1	ENSMUSG00000033268	Duox1	ortholog_one2one
ENSG00000137857	ENST00000561166	DUOX1	ENSMUSG00000033268	Duox1	ortholog_one2one
ENSG00000137857	ENST00000559219	DUOX1	ENSMUSG00000033268	Duox1	ortholog_one2one
ENSG00000137857	ENST00000557893	DUOX1	ENSMUSG00000033268	Duox1	ortholog_one2one
ENSG00000137857	ENST00000558446	DUOX1	ENSMUSG00000033268	Duox1	ortholog_one2one
ENSG00000137857	ENST00000559716	DUOX1	ENSMUSG00000033268	Duox1	ortholog_one2one
ENSG00000137857	ENST00000559221	DUOX1	ENSMUSG00000033268	Duox1	ortholog_one2one
ENSG00000137857	ENST00000558744	DUOX1	ENSMUSG00000033268	Duox1	ortholog_one2one
ENSG00000065057	ENST00000219066	NTHL1	ENSMUSG00000041429	Nthl1	ortholog_one2one
ENSG00000065057	ENST00000561862	NTHL1	ENSMUSG00000041429	Nthl1	ortholog_one2one
ENSG00000065057	ENST00000565406	NTHL1	ENSMUSG00000041429	Nthl1	ortholog_one2one
ENSG00000065057	ENST00000566380	NTHL1	ENSMUSG00000041429	Nthl1	ortholog_one2one
ENSG00000065057	ENST00000562951	NTHL1	ENSMUSG00000041429	Nthl1	ortholog_one2one
ENSG00000065057	ENST00000568513	NTHL1	ENSMUSG00000041429	Nthl1	ortholog_one2one
ENSG00000065057	ENST00000567727	NTHL1	ENSMUSG00000041429	Nthl1	ortholog_one2one
ENSG00000065057	ENST00000561841	NTHL1	ENSMUSG00000041429	Nthl1	ortholog_one2one
ENSG00000065057	ENST00000562120	NTHL1	ENSMUSG00000041429	Nthl1	ortholog_one2one
ENSG00000065057	ENST00000623977	NTHL1	ENSMUSG00000041429	Nthl1	ortholog_one2one
ENSG00000285043	ENST00000338110	AC093512.2	ENSMUSG00000063129	Aldoart2	ortholog_many2many
ENSG00000285043	ENST00000395248	AC093512.2	ENSMUSG00000063129	Aldoart2	ortholog_many2many
ENSG00000285043	ENST00000575627	AC093512.2	ENSMUSG00000063129	Aldoart2	ortholog_many2many
ENSG00000285043	ENST00000566897	AC093512.2	ENSMUSG00000063129	Aldoart2	ortholog_many2many
ENSG00000285043	ENST00000568435	AC093512.2	ENSMUSG00000063129	Aldoart2	ortholog_many2many
ENSG00000285043	ENST00000562240	AC093512.2	ENSMUSG00000063129	Aldoart2	ortholog_many2many
ENSG00000285043	ENST00000566280	AC093512.2	ENSMUSG00000063129	Aldoart2	ortholog_many2many
ENSG00000285043	ENST00000567249	AC093512.2	ENSMUSG00000063129	Aldoart2	ortholog_many2many
ENSG00000285043	ENST00000627059	AC093512.2	ENSMUSG00000063129	Aldoart2	ortholog_many2many
ENSG00000285043	ENST00000338110	AC093512.2	ENSMUSG00000030695	Aldoa	ortholog_many2many
ENSG00000285043	ENST00000395248	AC093512.2	ENSMUSG00000030695	Aldoa	ortholog_many2many
ENSG00000285043	ENST00000575627	AC093512.2	ENSMUSG00000030695	Aldoa	ortholog_many2many
ENSG00000285043	ENST00000566897	AC093512.2	ENSMUSG00000030695	Aldoa	ortholog_many2many
ENSG00000285043	ENST00000568435	AC093512.2	ENSMUSG00000030695	Aldoa	ortholog_many2many
ENSG00000285043	ENST00000562240	AC093512.2	ENSMUSG00000030695	Aldoa	ortholog_many2many
ENSG00000285043	ENST00000566280	AC093512.2	ENSMUSG00000030695	Aldoa	ortholog_many2many
ENSG00000285043	ENST00000567249	AC093512.2	ENSMUSG00000030695	Aldoa	ortholog_many2many
ENSG00000285043	ENST00000627059	AC093512.2	ENSMUSG00000030695	Aldoa	ortholog_many2many
ENSG00000285043	ENST00000338110	AC093512.2	ENSMUSG00000059343	Aldoart1	ortholog_many2many
ENSG00000285043	ENST00000395248	AC093512.2	ENSMUSG00000059343	Aldoart1	ortholog_many2many
ENSG00000285043	ENST00000575627	AC093512.2	ENSMUSG00000059343	Aldoart1	ortholog_many2many
ENSG00000285043	ENST00000566897	AC093512.2	ENSMUSG00000059343	Aldoart1	ortholog_many2many
ENSG00000285043	ENST00000568435	AC093512.2	ENSMUSG00000059343	Aldoart1	ortholog_many2many
ENSG00000285043	ENST00000562240	AC093512.2	ENSMUSG00000059343	Aldoart1	ortholog_many2many
ENSG00000285043	ENST00000566280	AC093512.2	ENSMUSG00000059343	Aldoart1	ortholog_many2many
ENSG00000285043	ENST00000567249	AC093512.2	ENSMUSG00000059343	Aldoart1	ortholog_many2many
ENSG00000285043	ENST00000627059	AC093512.2	ENSMUSG00000059343	Aldoart1	ortholog_many2many
ENSG00000258436	ENST00000556526	RNASE12	ENSMUSG00000068407	Rnase12	ortholog_one2one
ENSG00000011451	ENST00000263381	WIZ	ENSMUSG00000024050	Wiz	ortholog_one2one
ENSG00000011451	ENST00000599910	WIZ	ENSMUSG00000024050	Wiz	ortholog_one2one
ENSG00000011451	ENST00000599686	WIZ	ENSMUSG00000024050	Wiz	ortholog_one2one
ENSG00000011451	ENST00000643092	WIZ	ENSMUSG00000024050	Wiz	ortholog_one2one
ENSG00000011451	ENST00000648664	WIZ	ENSMUSG00000024050	Wiz	ortholog_one2one
ENSG00000011451	ENST00000600632	WIZ	ENSMUSG00000024050	Wiz	ortholog_one2one
ENSG00000011451	ENST00000595214	WIZ	ENSMUSG00000024050	Wiz	ortholog_one2one
ENSG00000011451	ENST00000596159	WIZ	ENSMUSG00000024050	Wiz	ortholog_one2one
ENSG00000011451	ENST00000389282	WIZ	ENSMUSG00000024050	Wiz	ortholog_one2one
ENSG00000011451	ENST00000545156	WIZ	ENSMUSG00000024050	Wiz	ortholog_one2one
ENSG00000132017	ENST00000254337	DCAF15	ENSMUSG00000037103	Dcaf15	ortholog_one2one
ENSG00000132017	ENST00000591802	DCAF15	ENSMUSG00000037103	Dcaf15	ortholog_one2one
ENSG00000132017	ENST00000585468	DCAF15	ENSMUSG00000037103	Dcaf15	ortholog_one2one
ENSG00000132017	ENST00000587307	DCAF15	ENSMUSG00000037103	Dcaf15	ortholog_one2one
ENSG00000132017	ENST00000588523	DCAF15	ENSMUSG00000037103	Dcaf15	ortholog_one2one
ENSG00000132017	ENST00000591385	DCAF15	ENSMUSG00000037103	Dcaf15	ortholog_one2one
ENSG00000155438	ENST00000285814	NIFK	ENSMUSG00000026377	Nifk	ortholog_one2one
ENSG00000155438	ENST00000423105	NIFK	ENSMUSG00000026377	Nifk	ortholog_one2one
ENSG00000155438	ENST00000481978	NIFK	ENSMUSG00000026377	Nifk	ortholog_one2one
ENSG00000155438	ENST00000498570	NIFK	ENSMUSG00000026377	Nifk	ortholog_one2one
ENSG00000155438	ENST00000447132	NIFK	ENSMUSG00000026377	Nifk	ortholog_one2one
ENSG00000155438	ENST00000451734	NIFK	ENSMUSG00000026377	Nifk	ortholog_one2one
ENSG00000155438	ENST00000477693	NIFK	ENSMUSG00000026377	Nifk	ortholog_one2one
ENSG00000155659	ENST00000427538	VSIG4	ENSMUSG00000044206	Vsig4	ortholog_one2one
ENSG00000155659	ENST00000374737	VSIG4	ENSMUSG00000044206	Vsig4	ortholog_one2one
ENSG00000155659	ENST00000412866	VSIG4	ENSMUSG00000044206	Vsig4	ortholog_one2one
ENSG00000155659	ENST00000455586	VSIG4	ENSMUSG00000044206	Vsig4	ortholog_one2one
ENSG00000153406	ENST00000283429	NMRAL1	ENSMUSG00000063445	Nmral1	ortholog_one2one
ENSG00000153406	ENST00000574733	NMRAL1	ENSMUSG00000063445	Nmral1	ortholog_one2one
ENSG00000153406	ENST00000571448	NMRAL1	ENSMUSG00000063445	Nmral1	ortholog_one2one
ENSG00000153406	ENST00000572232	NMRAL1	ENSMUSG00000063445	Nmral1	ortholog_one2one
ENSG00000153406	ENST00000404295	NMRAL1	ENSMUSG00000063445	Nmral1	ortholog_one2one
ENSG00000153406	ENST00000574425	NMRAL1	ENSMUSG00000063445	Nmral1	ortholog_one2one
ENSG00000153406	ENST00000572110	NMRAL1	ENSMUSG00000063445	Nmral1	ortholog_one2one
ENSG00000153406	ENST00000573533	NMRAL1	ENSMUSG00000063445	Nmral1	ortholog_one2one
ENSG00000153406	ENST00000576176	NMRAL1	ENSMUSG00000063445	Nmral1	ortholog_one2one
ENSG00000153406	ENST00000571291	NMRAL1	ENSMUSG00000063445	Nmral1	ortholog_one2one
ENSG00000153406	ENST00000572391	NMRAL1	ENSMUSG00000063445	Nmral1	ortholog_one2one
ENSG00000153406	ENST00000573520	NMRAL1	ENSMUSG00000063445	Nmral1	ortholog_one2one
ENSG00000153406	ENST00000573571	NMRAL1	ENSMUSG00000063445	Nmral1	ortholog_one2one
ENSG00000153406	ENST00000575002	NMRAL1	ENSMUSG00000063445	Nmral1	ortholog_one2one
ENSG00000153406	ENST00000575557	NMRAL1	ENSMUSG00000063445	Nmral1	ortholog_one2one
ENSG00000153406	ENST00000576935	NMRAL1	ENSMUSG00000063445	Nmral1	ortholog_one2one
ENSG00000153406	ENST00000575995	NMRAL1	ENSMUSG00000063445	Nmral1	ortholog_one2one
ENSG00000153406	ENST00000572559	NMRAL1	ENSMUSG00000063445	Nmral1	ortholog_one2one
ENSG00000177354	ENST00000374144	C10orf71	ENSMUSG00000071540	3425401B19Rik	ortholog_one2one
ENSG00000177354	ENST00000470615	C10orf71	ENSMUSG00000071540	3425401B19Rik	ortholog_one2one
ENSG00000132000	ENST00000587954	PODNL1	ENSMUSG00000012889	Podnl1	ortholog_one2one
ENSG00000132000	ENST00000588872	PODNL1	ENSMUSG00000012889	Podnl1	ortholog_one2one
ENSG00000132000	ENST00000538517	PODNL1	ENSMUSG00000012889	Podnl1	ortholog_one2one
ENSG00000132000	ENST00000339560	PODNL1	ENSMUSG00000012889	Podnl1	ortholog_one2one
ENSG00000132000	ENST00000254320	PODNL1	ENSMUSG00000012889	Podnl1	ortholog_one2one
ENSG00000132000	ENST00000538371	PODNL1	ENSMUSG00000012889	Podnl1	ortholog_one2one
ENSG00000132000	ENST00000588764	PODNL1	ENSMUSG00000012889	Podnl1	ortholog_one2one
ENSG00000132000	ENST00000591353	PODNL1	ENSMUSG00000012889	Podnl1	ortholog_one2one
ENSG00000132000	ENST00000586075	PODNL1	ENSMUSG00000012889	Podnl1	ortholog_one2one
ENSG00000132000	ENST00000587288	PODNL1	ENSMUSG00000012889	Podnl1	ortholog_one2one
ENSG00000132000	ENST00000585607	PODNL1	ENSMUSG00000012889	Podnl1	ortholog_one2one
ENSG00000132000	ENST00000587458	PODNL1	ENSMUSG00000012889	Podnl1	ortholog_one2one
ENSG00000132000	ENST00000588317	PODNL1	ENSMUSG00000012889	Podnl1	ortholog_one2one
ENSG00000132000	ENST00000645954	PODNL1	ENSMUSG00000012889	Podnl1	ortholog_one2one
ENSG00000165606	ENST00000374139	DRGX	ENSMUSG00000041730	Prrxl1	ortholog_one2one
ENSG00000165606	ENST00000434016	DRGX	ENSMUSG00000041730	Prrxl1	ortholog_one2one
ENSG00000083535	ENST00000326291	PIBF1	ENSMUSG00000022064	Pibf1	ortholog_one2one
ENSG00000083535	ENST00000617689	PIBF1	ENSMUSG00000022064	Pibf1	ortholog_one2one
ENSG00000083535	ENST00000489797	PIBF1	ENSMUSG00000022064	Pibf1	ortholog_one2one
ENSG00000083535	ENST00000492803	PIBF1	ENSMUSG00000022064	Pibf1	ortholog_one2one
ENSG00000083535	ENST00000486330	PIBF1	ENSMUSG00000022064	Pibf1	ortholog_one2one
ENSG00000083535	ENST00000489922	PIBF1	ENSMUSG00000022064	Pibf1	ortholog_one2one
ENSG00000083535	ENST00000469712	PIBF1	ENSMUSG00000022064	Pibf1	ortholog_one2one
ENSG00000083535	ENST00000615625	PIBF1	ENSMUSG00000022064	Pibf1	ortholog_one2one
ENSG00000102057	ENST00000376477	KCND1	ENSMUSG00000009731	Kcnd1	ortholog_one2one
ENSG00000102057	ENST00000218176	KCND1	ENSMUSG00000009731	Kcnd1	ortholog_one2one
ENSG00000102057	ENST00000419374	KCND1	ENSMUSG00000009731	Kcnd1	ortholog_one2one
ENSG00000184481	ENST00000374259	FOXO4	ENSMUSG00000042903	Foxo4	ortholog_one2one
ENSG00000184481	ENST00000466874	FOXO4	ENSMUSG00000042903	Foxo4	ortholog_one2one
ENSG00000184481	ENST00000341558	FOXO4	ENSMUSG00000042903	Foxo4	ortholog_one2one
ENSG00000184481	ENST00000464598	FOXO4	ENSMUSG00000042903	Foxo4	ortholog_one2one
ENSG00000127952	ENST00000359697	STYXL1	ENSMUSG00000019178	Styxl1	ortholog_one2one
ENSG00000127952	ENST00000340062	STYXL1	ENSMUSG00000019178	Styxl1	ortholog_one2one
ENSG00000127952	ENST00000430497	STYXL1	ENSMUSG00000019178	Styxl1	ortholog_one2one
ENSG00000127952	ENST00000438695	STYXL1	ENSMUSG00000019178	Styxl1	ortholog_one2one
ENSG00000127952	ENST00000431581	STYXL1	ENSMUSG00000019178	Styxl1	ortholog_one2one
ENSG00000127952	ENST00000454618	STYXL1	ENSMUSG00000019178	Styxl1	ortholog_one2one
ENSG00000127952	ENST00000451157	STYXL1	ENSMUSG00000019178	Styxl1	ortholog_one2one
ENSG00000127952	ENST00000474328	STYXL1	ENSMUSG00000019178	Styxl1	ortholog_one2one
ENSG00000127952	ENST00000460184	STYXL1	ENSMUSG00000019178	Styxl1	ortholog_one2one
ENSG00000127952	ENST00000360591	STYXL1	ENSMUSG00000019178	Styxl1	ortholog_one2one
ENSG00000127952	ENST00000248600	STYXL1	ENSMUSG00000019178	Styxl1	ortholog_one2one
ENSG00000114520	ENST00000251775	SNX4	ENSMUSG00000022808	Snx4	ortholog_one2one
ENSG00000114520	ENST00000471751	SNX4	ENSMUSG00000022808	Snx4	ortholog_one2one
ENSG00000114520	ENST00000482965	SNX4	ENSMUSG00000022808	Snx4	ortholog_one2one
ENSG00000114520	ENST00000473417	SNX4	ENSMUSG00000022808	Snx4	ortholog_one2one
ENSG00000114520	ENST00000465505	SNX4	ENSMUSG00000022808	Snx4	ortholog_one2one
ENSG00000168488	ENST00000563314	ATXN2L	ENSMUSG00000032637	Atxn2l	ortholog_one2one
ENSG00000168488	ENST00000340394	ATXN2L	ENSMUSG00000032637	Atxn2l	ortholog_one2one
ENSG00000168488	ENST00000325215	ATXN2L	ENSMUSG00000032637	Atxn2l	ortholog_one2one
ENSG00000168488	ENST00000395547	ATXN2L	ENSMUSG00000032637	Atxn2l	ortholog_one2one
ENSG00000168488	ENST00000336783	ATXN2L	ENSMUSG00000032637	Atxn2l	ortholog_one2one
ENSG00000168488	ENST00000382686	ATXN2L	ENSMUSG00000032637	Atxn2l	ortholog_one2one
ENSG00000168488	ENST00000564304	ATXN2L	ENSMUSG00000032637	Atxn2l	ortholog_one2one
ENSG00000168488	ENST00000570200	ATXN2L	ENSMUSG00000032637	Atxn2l	ortholog_one2one
ENSG00000168488	ENST00000562867	ATXN2L	ENSMUSG00000032637	Atxn2l	ortholog_one2one
ENSG00000168488	ENST00000568266	ATXN2L	ENSMUSG00000032637	Atxn2l	ortholog_one2one
ENSG00000168488	ENST00000564656	ATXN2L	ENSMUSG00000032637	Atxn2l	ortholog_one2one
ENSG00000168488	ENST00000561539	ATXN2L	ENSMUSG00000032637	Atxn2l	ortholog_one2one
ENSG00000168488	ENST00000566080	ATXN2L	ENSMUSG00000032637	Atxn2l	ortholog_one2one
ENSG00000168488	ENST00000565971	ATXN2L	ENSMUSG00000032637	Atxn2l	ortholog_one2one
ENSG00000168488	ENST00000570284	ATXN2L	ENSMUSG00000032637	Atxn2l	ortholog_one2one
ENSG00000168488	ENST00000564284	ATXN2L	ENSMUSG00000032637	Atxn2l	ortholog_one2one
ENSG00000168488	ENST00000565845	ATXN2L	ENSMUSG00000032637	Atxn2l	ortholog_one2one
ENSG00000168488	ENST00000564035	ATXN2L	ENSMUSG00000032637	Atxn2l	ortholog_one2one
ENSG00000168488	ENST00000566946	ATXN2L	ENSMUSG00000032637	Atxn2l	ortholog_one2one
ENSG00000168488	ENST00000562583	ATXN2L	ENSMUSG00000032637	Atxn2l	ortholog_one2one
ENSG00000168488	ENST00000561732	ATXN2L	ENSMUSG00000032637	Atxn2l	ortholog_one2one
ENSG00000168488	ENST00000562686	ATXN2L	ENSMUSG00000032637	Atxn2l	ortholog_one2one
ENSG00000168488	ENST00000569318	ATXN2L	ENSMUSG00000032637	Atxn2l	ortholog_one2one
ENSG00000168488	ENST00000566007	ATXN2L	ENSMUSG00000032637	Atxn2l	ortholog_one2one
ENSG00000168488	ENST00000564162	ATXN2L	ENSMUSG00000032637	Atxn2l	ortholog_one2one
ENSG00000168488	ENST00000567024	ATXN2L	ENSMUSG00000032637	Atxn2l	ortholog_one2one
ENSG00000184811	ENST00000333813	TRARG1	ENSMUSG00000046275	Trarg1	ortholog_one2one
ENSG00000183808	ENST00000399300	RBM12B	ENSMUSG00000052137	Rbm12b2	ortholog_one2many
ENSG00000183808	ENST00000517700	RBM12B	ENSMUSG00000052137	Rbm12b2	ortholog_one2many
ENSG00000183808	ENST00000520961	RBM12B	ENSMUSG00000052137	Rbm12b2	ortholog_one2many
ENSG00000183808	ENST00000519109	RBM12B	ENSMUSG00000052137	Rbm12b2	ortholog_one2many
ENSG00000183808	ENST00000518597	RBM12B	ENSMUSG00000052137	Rbm12b2	ortholog_one2many
ENSG00000183808	ENST00000520560	RBM12B	ENSMUSG00000052137	Rbm12b2	ortholog_one2many
ENSG00000183808	ENST00000521947	RBM12B	ENSMUSG00000052137	Rbm12b2	ortholog_one2many
ENSG00000183808	ENST00000627241	RBM12B	ENSMUSG00000052137	Rbm12b2	ortholog_one2many
ENSG00000183808	ENST00000399300	RBM12B	ENSMUSG00000046667	Rbm12b1	ortholog_one2many
ENSG00000183808	ENST00000517700	RBM12B	ENSMUSG00000046667	Rbm12b1	ortholog_one2many
ENSG00000183808	ENST00000520961	RBM12B	ENSMUSG00000046667	Rbm12b1	ortholog_one2many
ENSG00000183808	ENST00000519109	RBM12B	ENSMUSG00000046667	Rbm12b1	ortholog_one2many
ENSG00000183808	ENST00000518597	RBM12B	ENSMUSG00000046667	Rbm12b1	ortholog_one2many
ENSG00000183808	ENST00000520560	RBM12B	ENSMUSG00000046667	Rbm12b1	ortholog_one2many
ENSG00000183808	ENST00000521947	RBM12B	ENSMUSG00000046667	Rbm12b1	ortholog_one2many
ENSG00000183808	ENST00000627241	RBM12B	ENSMUSG00000046667	Rbm12b1	ortholog_one2many
ENSG00000049323	ENST00000404816	LTBP1	ENSMUSG00000001870	Ltbp1	ortholog_one2one
ENSG00000049323	ENST00000432635	LTBP1	ENSMUSG00000001870	Ltbp1	ortholog_one2one
ENSG00000049323	ENST00000402934	LTBP1	ENSMUSG00000001870	Ltbp1	ortholog_one2one
ENSG00000049323	ENST00000404525	LTBP1	ENSMUSG00000001870	Ltbp1	ortholog_one2one
ENSG00000049323	ENST00000407925	LTBP1	ENSMUSG00000001870	Ltbp1	ortholog_one2one
ENSG00000049323	ENST00000413303	LTBP1	ENSMUSG00000001870	Ltbp1	ortholog_one2one
ENSG00000049323	ENST00000468091	LTBP1	ENSMUSG00000001870	Ltbp1	ortholog_one2one
ENSG00000049323	ENST00000415140	LTBP1	ENSMUSG00000001870	Ltbp1	ortholog_one2one
ENSG00000049323	ENST00000498013	LTBP1	ENSMUSG00000001870	Ltbp1	ortholog_one2one
ENSG00000049323	ENST00000422669	LTBP1	ENSMUSG00000001870	Ltbp1	ortholog_one2one
ENSG00000049323	ENST00000489740	LTBP1	ENSMUSG00000001870	Ltbp1	ortholog_one2one
ENSG00000049323	ENST00000418533	LTBP1	ENSMUSG00000001870	Ltbp1	ortholog_one2one
ENSG00000008710	ENST00000262304	PKD1	ENSMUSG00000032855	Pkd1	ortholog_one2one
ENSG00000008710	ENST00000423118	PKD1	ENSMUSG00000032855	Pkd1	ortholog_one2one
ENSG00000008710	ENST00000472577	PKD1	ENSMUSG00000032855	Pkd1	ortholog_one2one
ENSG00000008710	ENST00000564313	PKD1	ENSMUSG00000032855	Pkd1	ortholog_one2one
ENSG00000008710	ENST00000561668	PKD1	ENSMUSG00000032855	Pkd1	ortholog_one2one
ENSG00000008710	ENST00000487932	PKD1	ENSMUSG00000032855	Pkd1	ortholog_one2one
ENSG00000008710	ENST00000485120	PKD1	ENSMUSG00000032855	Pkd1	ortholog_one2one
ENSG00000008710	ENST00000562425	PKD1	ENSMUSG00000032855	Pkd1	ortholog_one2one
ENSG00000008710	ENST00000567355	PKD1	ENSMUSG00000032855	Pkd1	ortholog_one2one
ENSG00000008710	ENST00000472659	PKD1	ENSMUSG00000032855	Pkd1	ortholog_one2one
ENSG00000008710	ENST00000568796	PKD1	ENSMUSG00000032855	Pkd1	ortholog_one2one
ENSG00000008710	ENST00000570253	PKD1	ENSMUSG00000032855	Pkd1	ortholog_one2one
ENSG00000008710	ENST00000562297	PKD1	ENSMUSG00000032855	Pkd1	ortholog_one2one
ENSG00000008710	ENST00000567946	PKD1	ENSMUSG00000032855	Pkd1	ortholog_one2one
ENSG00000008710	ENST00000486339	PKD1	ENSMUSG00000032855	Pkd1	ortholog_one2one
ENSG00000008710	ENST00000415938	PKD1	ENSMUSG00000032855	Pkd1	ortholog_one2one
ENSG00000008710	ENST00000483731	PKD1	ENSMUSG00000032855	Pkd1	ortholog_one2one
ENSG00000008710	ENST00000566905	PKD1	ENSMUSG00000032855	Pkd1	ortholog_one2one
ENSG00000008710	ENST00000496574	PKD1	ENSMUSG00000032855	Pkd1	ortholog_one2one
ENSG00000008710	ENST00000566784	PKD1	ENSMUSG00000032855	Pkd1	ortholog_one2one
ENSG00000008710	ENST00000471603	PKD1	ENSMUSG00000032855	Pkd1	ortholog_one2one
ENSG00000008710	ENST00000480227	PKD1	ENSMUSG00000032855	Pkd1	ortholog_one2one
ENSG00000008710	ENST00000570193	PKD1	ENSMUSG00000032855	Pkd1	ortholog_one2one
ENSG00000008710	ENST00000469851	PKD1	ENSMUSG00000032855	Pkd1	ortholog_one2one
ENSG00000008710	ENST00000483814	PKD1	ENSMUSG00000032855	Pkd1	ortholog_one2one
ENSG00000008710	ENST00000474088	PKD1	ENSMUSG00000032855	Pkd1	ortholog_one2one
ENSG00000008710	ENST00000475889	PKD1	ENSMUSG00000032855	Pkd1	ortholog_one2one
ENSG00000008710	ENST00000561991	PKD1	ENSMUSG00000032855	Pkd1	ortholog_one2one
ENSG00000008710	ENST00000565639	PKD1	ENSMUSG00000032855	Pkd1	ortholog_one2one
ENSG00000008710	ENST00000564865	PKD1	ENSMUSG00000032855	Pkd1	ortholog_one2one
ENSG00000008710	ENST00000564890	PKD1	ENSMUSG00000032855	Pkd1	ortholog_one2one
ENSG00000008710	ENST00000483558	PKD1	ENSMUSG00000032855	Pkd1	ortholog_one2one
ENSG00000008710	ENST00000568591	PKD1	ENSMUSG00000032855	Pkd1	ortholog_one2one
ENSG00000008710	ENST00000569983	PKD1	ENSMUSG00000032855	Pkd1	ortholog_one2one
ENSG00000008710	ENST00000483024	PKD1	ENSMUSG00000032855	Pkd1	ortholog_one2one
ENSG00000008710	ENST00000488185	PKD1	ENSMUSG00000032855	Pkd1	ortholog_one2one
ENSG00000008710	ENST00000473780	PKD1	ENSMUSG00000032855	Pkd1	ortholog_one2one
ENSG00000008710	ENST00000468674	PKD1	ENSMUSG00000032855	Pkd1	ortholog_one2one
ENSG00000008710	ENST00000469241	PKD1	ENSMUSG00000032855	Pkd1	ortholog_one2one
ENSG00000008710	ENST00000570150	PKD1	ENSMUSG00000032855	Pkd1	ortholog_one2one
ENSG00000145354	ENST00000646632	CISD2	ENSMUSG00000028165	Cisd2	ortholog_one2one
ENSG00000145354	ENST00000273986	CISD2	ENSMUSG00000028165	Cisd2	ortholog_one2one
ENSG00000145354	ENST00000650480	CISD2	ENSMUSG00000028165	Cisd2	ortholog_one2one
ENSG00000145354	ENST00000574446	CISD2	ENSMUSG00000028165	Cisd2	ortholog_one2one
ENSG00000145354	ENST00000643561	CISD2	ENSMUSG00000028165	Cisd2	ortholog_one2one
ENSG00000145354	ENST00000503643	CISD2	ENSMUSG00000028165	Cisd2	ortholog_one2one
ENSG00000101220	ENST00000399683	C20orf27	ENSMUSG00000027327	1700037H04Rik	ortholog_one2one
ENSG00000101220	ENST00000217195	C20orf27	ENSMUSG00000027327	1700037H04Rik	ortholog_one2one
ENSG00000101220	ENST00000399672	C20orf27	ENSMUSG00000027327	1700037H04Rik	ortholog_one2one
ENSG00000101220	ENST00000379772	C20orf27	ENSMUSG00000027327	1700037H04Rik	ortholog_one2one
ENSG00000155744	ENST00000418596	FAM126B	ENSMUSG00000038174	Fam126b	ortholog_one2one
ENSG00000155744	ENST00000286181	FAM126B	ENSMUSG00000038174	Fam126b	ortholog_one2one
ENSG00000155744	ENST00000490725	FAM126B	ENSMUSG00000038174	Fam126b	ortholog_one2one
ENSG00000155744	ENST00000498780	FAM126B	ENSMUSG00000038174	Fam126b	ortholog_one2one
ENSG00000155744	ENST00000452799	FAM126B	ENSMUSG00000038174	Fam126b	ortholog_one2one
ENSG00000155744	ENST00000453765	FAM126B	ENSMUSG00000038174	Fam126b	ortholog_one2one
ENSG00000155744	ENST00000446678	FAM126B	ENSMUSG00000038174	Fam126b	ortholog_one2one
ENSG00000155744	ENST00000485144	FAM126B	ENSMUSG00000038174	Fam126b	ortholog_one2one
ENSG00000155744	ENST00000474118	FAM126B	ENSMUSG00000038174	Fam126b	ortholog_one2one
ENSG00000155744	ENST00000485636	FAM126B	ENSMUSG00000038174	Fam126b	ortholog_one2one
ENSG00000155744	ENST00000494881	FAM126B	ENSMUSG00000038174	Fam126b	ortholog_one2one
ENSG00000147168	ENST00000276110	IL2RG	ENSMUSG00000031304	Il2rg	ortholog_many2many
ENSG00000147168	ENST00000374202	IL2RG	ENSMUSG00000031304	Il2rg	ortholog_many2many
ENSG00000147168	ENST00000512747	IL2RG	ENSMUSG00000031304	Il2rg	ortholog_many2many
ENSG00000147168	ENST00000482750	IL2RG	ENSMUSG00000031304	Il2rg	ortholog_many2many
ENSG00000147168	ENST00000464642	IL2RG	ENSMUSG00000031304	Il2rg	ortholog_many2many
ENSG00000147168	ENST00000487883	IL2RG	ENSMUSG00000031304	Il2rg	ortholog_many2many
ENSG00000147168	ENST00000473378	IL2RG	ENSMUSG00000031304	Il2rg	ortholog_many2many
ENSG00000147168	ENST00000374188	IL2RG	ENSMUSG00000031304	Il2rg	ortholog_many2many
ENSG00000147168	ENST00000456850	IL2RG	ENSMUSG00000031304	Il2rg	ortholog_many2many
ENSG00000147168	ENST00000276110	IL2RG	ENSMUSG00000092463	Gm20489	ortholog_many2many
ENSG00000147168	ENST00000374202	IL2RG	ENSMUSG00000092463	Gm20489	ortholog_many2many
ENSG00000147168	ENST00000512747	IL2RG	ENSMUSG00000092463	Gm20489	ortholog_many2many
ENSG00000147168	ENST00000482750	IL2RG	ENSMUSG00000092463	Gm20489	ortholog_many2many
ENSG00000147168	ENST00000464642	IL2RG	ENSMUSG00000092463	Gm20489	ortholog_many2many
ENSG00000147168	ENST00000487883	IL2RG	ENSMUSG00000092463	Gm20489	ortholog_many2many
ENSG00000147168	ENST00000473378	IL2RG	ENSMUSG00000092463	Gm20489	ortholog_many2many
ENSG00000147168	ENST00000374188	IL2RG	ENSMUSG00000092463	Gm20489	ortholog_many2many
ENSG00000147168	ENST00000456850	IL2RG	ENSMUSG00000092463	Gm20489	ortholog_many2many
ENSG00000168078	ENST00000301905	PBK	ENSMUSG00000022033	Pbk	ortholog_one2one
ENSG00000168078	ENST00000522944	PBK	ENSMUSG00000022033	Pbk	ortholog_one2one
ENSG00000168078	ENST00000524266	PBK	ENSMUSG00000022033	Pbk	ortholog_one2one
ENSG00000168078	ENST00000521226	PBK	ENSMUSG00000022033	Pbk	ortholog_one2one
ENSG00000122585	ENST00000242152	NPY	ENSMUSG00000029819	Npy	ortholog_one2one
ENSG00000122585	ENST00000407573	NPY	ENSMUSG00000029819	Npy	ortholog_one2one
ENSG00000122585	ENST00000405982	NPY	ENSMUSG00000029819	Npy	ortholog_one2one
ENSG00000184033	ENST00000328435	CTAG1B	ENSMUSG00000079536	Gm6880	ortholog_many2many
ENSG00000184033	ENST00000359887	CTAG1B	ENSMUSG00000079536	Gm6880	ortholog_many2many
ENSG00000184033	ENST00000328435	CTAG1B	ENSMUSG00000031181	Ctag2	ortholog_many2many
ENSG00000184033	ENST00000359887	CTAG1B	ENSMUSG00000031181	Ctag2	ortholog_many2many
ENSG00000184033	ENST00000328435	CTAG1B	ENSMUSG00000079532	Gm6890	ortholog_many2many
ENSG00000184033	ENST00000359887	CTAG1B	ENSMUSG00000079532	Gm6890	ortholog_many2many
ENSG00000204442	ENST00000375915	FAM155A	ENSMUSG00000079157	Fam155a	ortholog_one2one
ENSG00000170425	ENST00000304222	ADORA2B	ENSMUSG00000018500	Adora2b	ortholog_one2one
ENSG00000170425	ENST00000582124	ADORA2B	ENSMUSG00000018500	Adora2b	ortholog_one2one
ENSG00000186300	ENST00000334241	ZNF555	ENSMUSG00000055150	Zfp78	ortholog_many2many
ENSG00000186300	ENST00000585966	ZNF555	ENSMUSG00000055150	Zfp78	ortholog_many2many
ENSG00000186300	ENST00000591539	ZNF555	ENSMUSG00000055150	Zfp78	ortholog_many2many
ENSG00000221866	ENST00000359827	PLXNA4	ENSMUSG00000029765	Plxna4	ortholog_one2one
ENSG00000221866	ENST00000496550	PLXNA4	ENSMUSG00000029765	Plxna4	ortholog_one2one
ENSG00000221866	ENST00000423507	PLXNA4	ENSMUSG00000029765	Plxna4	ortholog_one2one
ENSG00000221866	ENST00000378539	PLXNA4	ENSMUSG00000029765	Plxna4	ortholog_one2one
ENSG00000221866	ENST00000321063	PLXNA4	ENSMUSG00000029765	Plxna4	ortholog_one2one
ENSG00000149925	ENST00000562302	ALDOA	ENSMUSG00000063129	Aldoart2	ortholog_many2many
ENSG00000149925	ENST00000562168	ALDOA	ENSMUSG00000063129	Aldoart2	ortholog_many2many
ENSG00000149925	ENST00000569545	ALDOA	ENSMUSG00000063129	Aldoart2	ortholog_many2many
ENSG00000149925	ENST00000563060	ALDOA	ENSMUSG00000063129	Aldoart2	ortholog_many2many
ENSG00000149925	ENST00000564521	ALDOA	ENSMUSG00000063129	Aldoart2	ortholog_many2many
ENSG00000149925	ENST00000412304	ALDOA	ENSMUSG00000063129	Aldoart2	ortholog_many2many
ENSG00000149925	ENST00000563987	ALDOA	ENSMUSG00000063129	Aldoart2	ortholog_many2many
ENSG00000149925	ENST00000564546	ALDOA	ENSMUSG00000063129	Aldoart2	ortholog_many2many
ENSG00000149925	ENST00000564595	ALDOA	ENSMUSG00000063129	Aldoart2	ortholog_many2many
ENSG00000149925	ENST00000643777	ALDOA	ENSMUSG00000063129	Aldoart2	ortholog_many2many
ENSG00000149925	ENST00000642816	ALDOA	ENSMUSG00000063129	Aldoart2	ortholog_many2many
ENSG00000149925	ENST00000567555	ALDOA	ENSMUSG00000063129	Aldoart2	ortholog_many2many
ENSG00000149925	ENST00000569798	ALDOA	ENSMUSG00000063129	Aldoart2	ortholog_many2many
ENSG00000149925	ENST00000395240	ALDOA	ENSMUSG00000063129	Aldoart2	ortholog_many2many
ENSG00000149925	ENST00000566012	ALDOA	ENSMUSG00000063129	Aldoart2	ortholog_many2many
ENSG00000149925	ENST00000566846	ALDOA	ENSMUSG00000063129	Aldoart2	ortholog_many2many
ENSG00000149925	ENST00000562679	ALDOA	ENSMUSG00000063129	Aldoart2	ortholog_many2many
ENSG00000149925	ENST00000564688	ALDOA	ENSMUSG00000063129	Aldoart2	ortholog_many2many
ENSG00000149925	ENST00000566146	ALDOA	ENSMUSG00000063129	Aldoart2	ortholog_many2many
ENSG00000149925	ENST00000566130	ALDOA	ENSMUSG00000063129	Aldoart2	ortholog_many2many
ENSG00000149925	ENST00000565355	ALDOA	ENSMUSG00000063129	Aldoart2	ortholog_many2many
ENSG00000149925	ENST00000562302	ALDOA	ENSMUSG00000030695	Aldoa	ortholog_many2many
ENSG00000149925	ENST00000562168	ALDOA	ENSMUSG00000030695	Aldoa	ortholog_many2many
ENSG00000149925	ENST00000569545	ALDOA	ENSMUSG00000030695	Aldoa	ortholog_many2many
ENSG00000149925	ENST00000563060	ALDOA	ENSMUSG00000030695	Aldoa	ortholog_many2many
ENSG00000149925	ENST00000564521	ALDOA	ENSMUSG00000030695	Aldoa	ortholog_many2many
ENSG00000149925	ENST00000412304	ALDOA	ENSMUSG00000030695	Aldoa	ortholog_many2many
ENSG00000149925	ENST00000563987	ALDOA	ENSMUSG00000030695	Aldoa	ortholog_many2many
ENSG00000149925	ENST00000564546	ALDOA	ENSMUSG00000030695	Aldoa	ortholog_many2many
ENSG00000149925	ENST00000564595	ALDOA	ENSMUSG00000030695	Aldoa	ortholog_many2many
ENSG00000149925	ENST00000643777	ALDOA	ENSMUSG00000030695	Aldoa	ortholog_many2many
ENSG00000149925	ENST00000642816	ALDOA	ENSMUSG00000030695	Aldoa	ortholog_many2many
ENSG00000149925	ENST00000567555	ALDOA	ENSMUSG00000030695	Aldoa	ortholog_many2many
ENSG00000149925	ENST00000569798	ALDOA	ENSMUSG00000030695	Aldoa	ortholog_many2many
ENSG00000149925	ENST00000395240	ALDOA	ENSMUSG00000030695	Aldoa	ortholog_many2many
ENSG00000149925	ENST00000566012	ALDOA	ENSMUSG00000030695	Aldoa	ortholog_many2many
ENSG00000149925	ENST00000566846	ALDOA	ENSMUSG00000030695	Aldoa	ortholog_many2many
ENSG00000149925	ENST00000562679	ALDOA	ENSMUSG00000030695	Aldoa	ortholog_many2many
ENSG00000149925	ENST00000564688	ALDOA	ENSMUSG00000030695	Aldoa	ortholog_many2many
ENSG00000149925	ENST00000566146	ALDOA	ENSMUSG00000030695	Aldoa	ortholog_many2many
ENSG00000149925	ENST00000566130	ALDOA	ENSMUSG00000030695	Aldoa	ortholog_many2many
ENSG00000149925	ENST00000565355	ALDOA	ENSMUSG00000030695	Aldoa	ortholog_many2many
ENSG00000149925	ENST00000562302	ALDOA	ENSMUSG00000059343	Aldoart1	ortholog_many2many
ENSG00000149925	ENST00000562168	ALDOA	ENSMUSG00000059343	Aldoart1	ortholog_many2many
ENSG00000149925	ENST00000569545	ALDOA	ENSMUSG00000059343	Aldoart1	ortholog_many2many
ENSG00000149925	ENST00000563060	ALDOA	ENSMUSG00000059343	Aldoart1	ortholog_many2many
ENSG00000149925	ENST00000564521	ALDOA	ENSMUSG00000059343	Aldoart1	ortholog_many2many
ENSG00000149925	ENST00000412304	ALDOA	ENSMUSG00000059343	Aldoart1	ortholog_many2many
ENSG00000149925	ENST00000563987	ALDOA	ENSMUSG00000059343	Aldoart1	ortholog_many2many
ENSG00000149925	ENST00000564546	ALDOA	ENSMUSG00000059343	Aldoart1	ortholog_many2many
ENSG00000149925	ENST00000564595	ALDOA	ENSMUSG00000059343	Aldoart1	ortholog_many2many
ENSG00000149925	ENST00000643777	ALDOA	ENSMUSG00000059343	Aldoart1	ortholog_many2many
ENSG00000149925	ENST00000642816	ALDOA	ENSMUSG00000059343	Aldoart1	ortholog_many2many
ENSG00000149925	ENST00000567555	ALDOA	ENSMUSG00000059343	Aldoart1	ortholog_many2many
ENSG00000149925	ENST00000569798	ALDOA	ENSMUSG00000059343	Aldoart1	ortholog_many2many
ENSG00000149925	ENST00000395240	ALDOA	ENSMUSG00000059343	Aldoart1	ortholog_many2many
ENSG00000149925	ENST00000566012	ALDOA	ENSMUSG00000059343	Aldoart1	ortholog_many2many
ENSG00000149925	ENST00000566846	ALDOA	ENSMUSG00000059343	Aldoart1	ortholog_many2many
ENSG00000149925	ENST00000562679	ALDOA	ENSMUSG00000059343	Aldoart1	ortholog_many2many
ENSG00000149925	ENST00000564688	ALDOA	ENSMUSG00000059343	Aldoart1	ortholog_many2many
ENSG00000149925	ENST00000566146	ALDOA	ENSMUSG00000059343	Aldoart1	ortholog_many2many
ENSG00000149925	ENST00000566130	ALDOA	ENSMUSG00000059343	Aldoart1	ortholog_many2many
ENSG00000149925	ENST00000565355	ALDOA	ENSMUSG00000059343	Aldoart1	ortholog_many2many
ENSG00000106483	ENST00000436072	SFRP4	ENSMUSG00000021319	Sfrp4	ortholog_one2one
ENSG00000106483	ENST00000478975	SFRP4	ENSMUSG00000021319	Sfrp4	ortholog_one2one
ENSG00000106483	ENST00000447200	SFRP4	ENSMUSG00000021319	Sfrp4	ortholog_one2one
ENSG00000093217	ENST00000427323	XYLB	ENSMUSG00000035769	Xylb	ortholog_one2one
ENSG00000093217	ENST00000207870	XYLB	ENSMUSG00000035769	Xylb	ortholog_one2one
ENSG00000093217	ENST00000650590	XYLB	ENSMUSG00000035769	Xylb	ortholog_one2one
ENSG00000093217	ENST00000424034	XYLB	ENSMUSG00000035769	Xylb	ortholog_one2one
ENSG00000093217	ENST00000649234	XYLB	ENSMUSG00000035769	Xylb	ortholog_one2one
ENSG00000093217	ENST00000487569	XYLB	ENSMUSG00000035769	Xylb	ortholog_one2one
ENSG00000093217	ENST00000472721	XYLB	ENSMUSG00000035769	Xylb	ortholog_one2one
ENSG00000175376	ENST00000526451	EIF1AD	ENSMUSG00000024841	Eif1ad	ortholog_one2one
ENSG00000175376	ENST00000312234	EIF1AD	ENSMUSG00000024841	Eif1ad	ortholog_one2one
ENSG00000175376	ENST00000525767	EIF1AD	ENSMUSG00000024841	Eif1ad	ortholog_one2one
ENSG00000175376	ENST00000529964	EIF1AD	ENSMUSG00000024841	Eif1ad	ortholog_one2one
ENSG00000175376	ENST00000533544	EIF1AD	ENSMUSG00000024841	Eif1ad	ortholog_one2one
ENSG00000175376	ENST00000527249	EIF1AD	ENSMUSG00000024841	Eif1ad	ortholog_one2one
ENSG00000175376	ENST00000529973	EIF1AD	ENSMUSG00000024841	Eif1ad	ortholog_one2one
ENSG00000175376	ENST00000530462	EIF1AD	ENSMUSG00000024841	Eif1ad	ortholog_one2one
ENSG00000175376	ENST00000532707	EIF1AD	ENSMUSG00000024841	Eif1ad	ortholog_one2one
ENSG00000175376	ENST00000527051	EIF1AD	ENSMUSG00000024841	Eif1ad	ortholog_one2one
ENSG00000175376	ENST00000526449	EIF1AD	ENSMUSG00000024841	Eif1ad	ortholog_one2one
ENSG00000120686	ENST00000494372	UFM1	ENSMUSG00000027746	Ufm1	ortholog_one2one
ENSG00000120686	ENST00000379649	UFM1	ENSMUSG00000027746	Ufm1	ortholog_one2one
ENSG00000120686	ENST00000239878	UFM1	ENSMUSG00000027746	Ufm1	ortholog_one2one
ENSG00000120686	ENST00000464423	UFM1	ENSMUSG00000027746	Ufm1	ortholog_one2one
ENSG00000120686	ENST00000437952	UFM1	ENSMUSG00000027746	Ufm1	ortholog_one2one
ENSG00000021826	ENST00000417946	CPS1	ENSMUSG00000025991	Cps1	ortholog_one2one
ENSG00000021826	ENST00000518043	CPS1	ENSMUSG00000025991	Cps1	ortholog_one2one
ENSG00000021826	ENST00000523702	CPS1	ENSMUSG00000025991	Cps1	ortholog_one2one
ENSG00000021826	ENST00000430249	CPS1	ENSMUSG00000025991	Cps1	ortholog_one2one
ENSG00000021826	ENST00000233072	CPS1	ENSMUSG00000025991	Cps1	ortholog_one2one
ENSG00000021826	ENST00000497163	CPS1	ENSMUSG00000025991	Cps1	ortholog_one2one
ENSG00000021826	ENST00000451903	CPS1	ENSMUSG00000025991	Cps1	ortholog_one2one
ENSG00000021826	ENST00000467353	CPS1	ENSMUSG00000025991	Cps1	ortholog_one2one
ENSG00000021826	ENST00000497121	CPS1	ENSMUSG00000025991	Cps1	ortholog_one2one
ENSG00000021826	ENST00000645825	CPS1	ENSMUSG00000025991	Cps1	ortholog_one2one
ENSG00000021826	ENST00000470791	CPS1	ENSMUSG00000025991	Cps1	ortholog_one2one
ENSG00000021826	ENST00000479988	CPS1	ENSMUSG00000025991	Cps1	ortholog_one2one
ENSG00000021826	ENST00000619804	CPS1	ENSMUSG00000025991	Cps1	ortholog_one2one
ENSG00000035141	ENST00000037869	FAM136A	ENSMUSG00000057497	Fam136a	ortholog_one2one
ENSG00000035141	ENST00000460307	FAM136A	ENSMUSG00000057497	Fam136a	ortholog_one2one
ENSG00000035141	ENST00000450256	FAM136A	ENSMUSG00000057497	Fam136a	ortholog_one2one
ENSG00000035141	ENST00000430566	FAM136A	ENSMUSG00000057497	Fam136a	ortholog_one2one
ENSG00000035141	ENST00000438759	FAM136A	ENSMUSG00000057497	Fam136a	ortholog_one2one
ENSG00000035141	ENST00000498665	FAM136A	ENSMUSG00000057497	Fam136a	ortholog_one2one
ENSG00000136122	ENST00000390667	BORA	ENSMUSG00000022070	Bora	ortholog_one2one
ENSG00000136122	ENST00000618209	BORA	ENSMUSG00000022070	Bora	ortholog_one2one
ENSG00000136122	ENST00000377814	BORA	ENSMUSG00000022070	Bora	ortholog_one2one
ENSG00000136122	ENST00000377815	BORA	ENSMUSG00000022070	Bora	ortholog_one2one
ENSG00000136122	ENST00000471712	BORA	ENSMUSG00000022070	Bora	ortholog_one2one
ENSG00000136122	ENST00000464754	BORA	ENSMUSG00000022070	Bora	ortholog_one2one
ENSG00000136122	ENST00000613797	BORA	ENSMUSG00000022070	Bora	ortholog_one2one
ENSG00000105639	ENST00000527031	JAK3	ENSMUSG00000031805	Jak3	ortholog_one2one
ENSG00000105639	ENST00000527670	JAK3	ENSMUSG00000031805	Jak3	ortholog_one2one
ENSG00000105639	ENST00000534444	JAK3	ENSMUSG00000031805	Jak3	ortholog_one2one
ENSG00000105639	ENST00000526008	JAK3	ENSMUSG00000031805	Jak3	ortholog_one2one
ENSG00000105639	ENST00000528705	JAK3	ENSMUSG00000031805	Jak3	ortholog_one2one
ENSG00000105639	ENST00000528293	JAK3	ENSMUSG00000031805	Jak3	ortholog_one2one
ENSG00000105639	ENST00000458235	JAK3	ENSMUSG00000031805	Jak3	ortholog_one2one
ENSG00000187605	ENST00000409262	TET3	ENSMUSG00000034832	Tet3	ortholog_one2one
ENSG00000187605	ENST00000496886	TET3	ENSMUSG00000034832	Tet3	ortholog_one2one
ENSG00000187605	ENST00000305799	TET3	ENSMUSG00000034832	Tet3	ortholog_one2one
ENSG00000187605	ENST00000475405	TET3	ENSMUSG00000034832	Tet3	ortholog_one2one
ENSG00000285171	ENST00000645518	AL590764.2	ENSMUSG00000031304	Il2rg	ortholog_many2many
ENSG00000285171	ENST00000644911	AL590764.2	ENSMUSG00000031304	Il2rg	ortholog_many2many
ENSG00000285171	ENST00000646505	AL590764.2	ENSMUSG00000031304	Il2rg	ortholog_many2many
ENSG00000285171	ENST00000646106	AL590764.2	ENSMUSG00000031304	Il2rg	ortholog_many2many
ENSG00000285171	ENST00000647492	AL590764.2	ENSMUSG00000031304	Il2rg	ortholog_many2many
ENSG00000285171	ENST00000644022	AL590764.2	ENSMUSG00000031304	Il2rg	ortholog_many2many
ENSG00000285171	ENST00000645266	AL590764.2	ENSMUSG00000031304	Il2rg	ortholog_many2many
ENSG00000285171	ENST00000644708	AL590764.2	ENSMUSG00000031304	Il2rg	ortholog_many2many
ENSG00000285171	ENST00000642473	AL590764.2	ENSMUSG00000031304	Il2rg	ortholog_many2many
ENSG00000285171	ENST00000645518	AL590764.2	ENSMUSG00000092463	Gm20489	ortholog_many2many
ENSG00000285171	ENST00000644911	AL590764.2	ENSMUSG00000092463	Gm20489	ortholog_many2many
ENSG00000285171	ENST00000646505	AL590764.2	ENSMUSG00000092463	Gm20489	ortholog_many2many
ENSG00000285171	ENST00000646106	AL590764.2	ENSMUSG00000092463	Gm20489	ortholog_many2many
ENSG00000285171	ENST00000647492	AL590764.2	ENSMUSG00000092463	Gm20489	ortholog_many2many
ENSG00000285171	ENST00000644022	AL590764.2	ENSMUSG00000092463	Gm20489	ortholog_many2many
ENSG00000285171	ENST00000645266	AL590764.2	ENSMUSG00000092463	Gm20489	ortholog_many2many
ENSG00000285171	ENST00000644708	AL590764.2	ENSMUSG00000092463	Gm20489	ortholog_many2many
ENSG00000285171	ENST00000642473	AL590764.2	ENSMUSG00000092463	Gm20489	ortholog_many2many
ENSG00000130731	ENST00000338401	METTL26	ENSMUSG00000025731	Mettl26	ortholog_one2one
ENSG00000130731	ENST00000397666	METTL26	ENSMUSG00000025731	Mettl26	ortholog_one2one
ENSG00000130731	ENST00000301686	METTL26	ENSMUSG00000025731	Mettl26	ortholog_one2one
ENSG00000130731	ENST00000448973	METTL26	ENSMUSG00000025731	Mettl26	ortholog_one2one
ENSG00000130731	ENST00000397664	METTL26	ENSMUSG00000025731	Mettl26	ortholog_one2one
ENSG00000130731	ENST00000568077	METTL26	ENSMUSG00000025731	Mettl26	ortholog_one2one
ENSG00000130731	ENST00000456420	METTL26	ENSMUSG00000025731	Mettl26	ortholog_one2one
ENSG00000130731	ENST00000397665	METTL26	ENSMUSG00000025731	Mettl26	ortholog_one2one
ENSG00000130731	ENST00000564039	METTL26	ENSMUSG00000025731	Mettl26	ortholog_one2one
ENSG00000130731	ENST00000568773	METTL26	ENSMUSG00000025731	Mettl26	ortholog_one2one
ENSG00000130731	ENST00000565163	METTL26	ENSMUSG00000025731	Mettl26	ortholog_one2one
ENSG00000130731	ENST00000568830	METTL26	ENSMUSG00000025731	Mettl26	ortholog_one2one
ENSG00000130731	ENST00000565799	METTL26	ENSMUSG00000025731	Mettl26	ortholog_one2one
ENSG00000130731	ENST00000614890	METTL26	ENSMUSG00000025731	Mettl26	ortholog_one2one
ENSG00000204165	ENST00000438526	CXorf65	ENSMUSG00000090141	Gm614	ortholog_one2one
ENSG00000204165	ENST00000466160	CXorf65	ENSMUSG00000090141	Gm614	ortholog_one2one
ENSG00000204165	ENST00000374251	CXorf65	ENSMUSG00000090141	Gm614	ortholog_one2one
ENSG00000204165	ENST00000483257	CXorf65	ENSMUSG00000090141	Gm614	ortholog_one2one
ENSG00000078579	ENST00000180166	FGF20	ENSMUSG00000031603	Fgf20	ortholog_one2one
ENSG00000078579	ENST00000519941	FGF20	ENSMUSG00000031603	Fgf20	ortholog_one2one
ENSG00000177951	ENST00000410108	BET1L	ENSMUSG00000025484	Bet1l	ortholog_one2one
ENSG00000177951	ENST00000325147	BET1L	ENSMUSG00000025484	Bet1l	ortholog_one2one
ENSG00000177951	ENST00000382762	BET1L	ENSMUSG00000025484	Bet1l	ortholog_one2one
ENSG00000177951	ENST00000529614	BET1L	ENSMUSG00000025484	Bet1l	ortholog_one2one
ENSG00000177951	ENST00000332865	BET1L	ENSMUSG00000025484	Bet1l	ortholog_one2one
ENSG00000177951	ENST00000486280	BET1L	ENSMUSG00000025484	Bet1l	ortholog_one2one
ENSG00000177951	ENST00000479463	BET1L	ENSMUSG00000025484	Bet1l	ortholog_one2one
ENSG00000204950	ENST00000378075	LRRC10B	ENSMUSG00000090291	Lrrc10b	ortholog_one2one
ENSG00000144891	ENST00000497524	AGTR1	ENSMUSG00000049115	Agtr1a	ortholog_one2many
ENSG00000144891	ENST00000349243	AGTR1	ENSMUSG00000049115	Agtr1a	ortholog_one2many
ENSG00000144891	ENST00000404754	AGTR1	ENSMUSG00000049115	Agtr1a	ortholog_one2many
ENSG00000144891	ENST00000475166	AGTR1	ENSMUSG00000049115	Agtr1a	ortholog_one2many
ENSG00000144891	ENST00000475347	AGTR1	ENSMUSG00000049115	Agtr1a	ortholog_one2many
ENSG00000144891	ENST00000474935	AGTR1	ENSMUSG00000049115	Agtr1a	ortholog_one2many
ENSG00000144891	ENST00000461609	AGTR1	ENSMUSG00000049115	Agtr1a	ortholog_one2many
ENSG00000144891	ENST00000418473	AGTR1	ENSMUSG00000049115	Agtr1a	ortholog_one2many
ENSG00000144891	ENST00000402260	AGTR1	ENSMUSG00000049115	Agtr1a	ortholog_one2many
ENSG00000144891	ENST00000497524	AGTR1	ENSMUSG00000054988	Agtr1b	ortholog_one2many
ENSG00000144891	ENST00000349243	AGTR1	ENSMUSG00000054988	Agtr1b	ortholog_one2many
ENSG00000144891	ENST00000404754	AGTR1	ENSMUSG00000054988	Agtr1b	ortholog_one2many
ENSG00000144891	ENST00000475166	AGTR1	ENSMUSG00000054988	Agtr1b	ortholog_one2many
ENSG00000144891	ENST00000475347	AGTR1	ENSMUSG00000054988	Agtr1b	ortholog_one2many
ENSG00000144891	ENST00000474935	AGTR1	ENSMUSG00000054988	Agtr1b	ortholog_one2many
ENSG00000144891	ENST00000461609	AGTR1	ENSMUSG00000054988	Agtr1b	ortholog_one2many
ENSG00000144891	ENST00000418473	AGTR1	ENSMUSG00000054988	Agtr1b	ortholog_one2many
ENSG00000144891	ENST00000402260	AGTR1	ENSMUSG00000054988	Agtr1b	ortholog_one2many
ENSG00000164066	ENST00000504491	INTU	ENSMUSG00000060798	Intu	ortholog_one2one
ENSG00000164066	ENST00000335251	INTU	ENSMUSG00000060798	Intu	ortholog_one2one
ENSG00000164066	ENST00000503626	INTU	ENSMUSG00000060798	Intu	ortholog_one2one
ENSG00000164066	ENST00000503952	INTU	ENSMUSG00000060798	Intu	ortholog_one2one
ENSG00000164066	ENST00000504276	INTU	ENSMUSG00000060798	Intu	ortholog_one2one
ENSG00000164066	ENST00000506283	INTU	ENSMUSG00000060798	Intu	ortholog_one2one
ENSG00000164066	ENST00000512995	INTU	ENSMUSG00000060798	Intu	ortholog_one2one
ENSG00000164066	ENST00000510766	INTU	ENSMUSG00000060798	Intu	ortholog_one2one
ENSG00000101844	ENST00000372232	ATG4A	ENSMUSG00000079418	Atg4a	ortholog_one2many
ENSG00000101844	ENST00000345734	ATG4A	ENSMUSG00000079418	Atg4a	ortholog_one2many
ENSG00000101844	ENST00000457035	ATG4A	ENSMUSG00000079418	Atg4a	ortholog_one2many
ENSG00000101844	ENST00000372246	ATG4A	ENSMUSG00000079418	Atg4a	ortholog_one2many
ENSG00000101844	ENST00000343524	ATG4A	ENSMUSG00000079418	Atg4a	ortholog_one2many
ENSG00000101844	ENST00000394892	ATG4A	ENSMUSG00000079418	Atg4a	ortholog_one2many
ENSG00000101844	ENST00000474825	ATG4A	ENSMUSG00000079418	Atg4a	ortholog_one2many
ENSG00000101844	ENST00000489247	ATG4A	ENSMUSG00000079418	Atg4a	ortholog_one2many
ENSG00000101844	ENST00000372232	ATG4A	ENSMUSG00000087119	Atg4a-ps	ortholog_one2many
ENSG00000101844	ENST00000345734	ATG4A	ENSMUSG00000087119	Atg4a-ps	ortholog_one2many
ENSG00000101844	ENST00000457035	ATG4A	ENSMUSG00000087119	Atg4a-ps	ortholog_one2many
ENSG00000101844	ENST00000372246	ATG4A	ENSMUSG00000087119	Atg4a-ps	ortholog_one2many
ENSG00000101844	ENST00000343524	ATG4A	ENSMUSG00000087119	Atg4a-ps	ortholog_one2many
ENSG00000101844	ENST00000394892	ATG4A	ENSMUSG00000087119	Atg4a-ps	ortholog_one2many
ENSG00000101844	ENST00000474825	ATG4A	ENSMUSG00000087119	Atg4a-ps	ortholog_one2many
ENSG00000101844	ENST00000489247	ATG4A	ENSMUSG00000087119	Atg4a-ps	ortholog_one2many
ENSG00000187037	ENST00000461610	GPR141	ENSMUSG00000053101	Gpr141	ortholog_one2one
ENSG00000187037	ENST00000450180	GPR141	ENSMUSG00000053101	Gpr141	ortholog_one2one
ENSG00000187037	ENST00000467202	GPR141	ENSMUSG00000053101	Gpr141	ortholog_one2one
ENSG00000187037	ENST00000447769	GPR141	ENSMUSG00000053101	Gpr141	ortholog_one2one
ENSG00000187037	ENST00000334425	GPR141	ENSMUSG00000053101	Gpr141	ortholog_one2one
ENSG00000164111	ENST00000296511	ANXA5	ENSMUSG00000027712	Anxa5	ortholog_one2one
ENSG00000164111	ENST00000501272	ANXA5	ENSMUSG00000027712	Anxa5	ortholog_one2one
ENSG00000164111	ENST00000506395	ANXA5	ENSMUSG00000027712	Anxa5	ortholog_one2one
ENSG00000164111	ENST00000515017	ANXA5	ENSMUSG00000027712	Anxa5	ortholog_one2one
ENSG00000164111	ENST00000509648	ANXA5	ENSMUSG00000027712	Anxa5	ortholog_one2one
ENSG00000164111	ENST00000515717	ANXA5	ENSMUSG00000027712	Anxa5	ortholog_one2one
ENSG00000164111	ENST00000511552	ANXA5	ENSMUSG00000027712	Anxa5	ortholog_one2one
ENSG00000164111	ENST00000509016	ANXA5	ENSMUSG00000027712	Anxa5	ortholog_one2one
ENSG00000164111	ENST00000513428	ANXA5	ENSMUSG00000027712	Anxa5	ortholog_one2one
ENSG00000164111	ENST00000513523	ANXA5	ENSMUSG00000027712	Anxa5	ortholog_one2one
ENSG00000164111	ENST00000513728	ANXA5	ENSMUSG00000027712	Anxa5	ortholog_one2one
ENSG00000086288	ENST00000199447	NME8	ENSMUSG00000041138	Nme8	ortholog_one2one
ENSG00000086288	ENST00000455500	NME8	ENSMUSG00000041138	Nme8	ortholog_one2one
ENSG00000086288	ENST00000444718	NME8	ENSMUSG00000041138	Nme8	ortholog_one2one
ENSG00000086288	ENST00000440017	NME8	ENSMUSG00000041138	Nme8	ortholog_one2one
ENSG00000086288	ENST00000426106	NME8	ENSMUSG00000041138	Nme8	ortholog_one2one
ENSG00000086288	ENST00000476435	NME8	ENSMUSG00000041138	Nme8	ortholog_one2one
ENSG00000066336	ENST00000378538	SPI1	ENSMUSG00000002111	Spi1	ortholog_one2one
ENSG00000066336	ENST00000227163	SPI1	ENSMUSG00000002111	Spi1	ortholog_one2one
ENSG00000066336	ENST00000533030	SPI1	ENSMUSG00000002111	Spi1	ortholog_one2one
ENSG00000066336	ENST00000533968	SPI1	ENSMUSG00000002111	Spi1	ortholog_one2one
ENSG00000135960	ENST00000409271	EDAR	ENSMUSG00000003227	Edar	ortholog_one2one
ENSG00000135960	ENST00000258443	EDAR	ENSMUSG00000003227	Edar	ortholog_one2one
ENSG00000135960	ENST00000376651	EDAR	ENSMUSG00000003227	Edar	ortholog_one2one
ENSG00000186074	ENST00000326165	CD300LF	ENSMUSG00000069609	Cd300ld4	ortholog_one2many
ENSG00000186074	ENST00000469092	CD300LF	ENSMUSG00000069609	Cd300ld4	ortholog_one2many
ENSG00000186074	ENST00000301573	CD300LF	ENSMUSG00000069609	Cd300ld4	ortholog_one2many
ENSG00000186074	ENST00000583937	CD300LF	ENSMUSG00000069609	Cd300ld4	ortholog_one2many
ENSG00000186074	ENST00000464910	CD300LF	ENSMUSG00000069609	Cd300ld4	ortholog_one2many
ENSG00000186074	ENST00000462044	CD300LF	ENSMUSG00000069609	Cd300ld4	ortholog_one2many
ENSG00000186074	ENST00000581500	CD300LF	ENSMUSG00000069609	Cd300ld4	ortholog_one2many
ENSG00000186074	ENST00000583544	CD300LF	ENSMUSG00000069609	Cd300ld4	ortholog_one2many
ENSG00000186074	ENST00000343125	CD300LF	ENSMUSG00000069609	Cd300ld4	ortholog_one2many
ENSG00000186074	ENST00000361254	CD300LF	ENSMUSG00000069609	Cd300ld4	ortholog_one2many
ENSG00000186074	ENST00000326165	CD300LF	ENSMUSG00000047798	Cd300lf	ortholog_one2many
ENSG00000186074	ENST00000469092	CD300LF	ENSMUSG00000047798	Cd300lf	ortholog_one2many
ENSG00000186074	ENST00000301573	CD300LF	ENSMUSG00000047798	Cd300lf	ortholog_one2many
ENSG00000186074	ENST00000583937	CD300LF	ENSMUSG00000047798	Cd300lf	ortholog_one2many
ENSG00000186074	ENST00000464910	CD300LF	ENSMUSG00000047798	Cd300lf	ortholog_one2many
ENSG00000186074	ENST00000462044	CD300LF	ENSMUSG00000047798	Cd300lf	ortholog_one2many
ENSG00000186074	ENST00000581500	CD300LF	ENSMUSG00000047798	Cd300lf	ortholog_one2many
ENSG00000186074	ENST00000583544	CD300LF	ENSMUSG00000047798	Cd300lf	ortholog_one2many
ENSG00000186074	ENST00000343125	CD300LF	ENSMUSG00000047798	Cd300lf	ortholog_one2many
ENSG00000186074	ENST00000361254	CD300LF	ENSMUSG00000047798	Cd300lf	ortholog_one2many
ENSG00000186074	ENST00000326165	CD300LF	ENSMUSG00000034641	Cd300ld	ortholog_one2many
ENSG00000186074	ENST00000469092	CD300LF	ENSMUSG00000034641	Cd300ld	ortholog_one2many
ENSG00000186074	ENST00000301573	CD300LF	ENSMUSG00000034641	Cd300ld	ortholog_one2many
ENSG00000186074	ENST00000583937	CD300LF	ENSMUSG00000034641	Cd300ld	ortholog_one2many
ENSG00000186074	ENST00000464910	CD300LF	ENSMUSG00000034641	Cd300ld	ortholog_one2many
ENSG00000186074	ENST00000462044	CD300LF	ENSMUSG00000034641	Cd300ld	ortholog_one2many
ENSG00000186074	ENST00000581500	CD300LF	ENSMUSG00000034641	Cd300ld	ortholog_one2many
ENSG00000186074	ENST00000583544	CD300LF	ENSMUSG00000034641	Cd300ld	ortholog_one2many
ENSG00000186074	ENST00000343125	CD300LF	ENSMUSG00000034641	Cd300ld	ortholog_one2many
ENSG00000186074	ENST00000361254	CD300LF	ENSMUSG00000034641	Cd300ld	ortholog_one2many
ENSG00000186074	ENST00000326165	CD300LF	ENSMUSG00000089753	Cd300ld2	ortholog_one2many
ENSG00000186074	ENST00000469092	CD300LF	ENSMUSG00000089753	Cd300ld2	ortholog_one2many
ENSG00000186074	ENST00000301573	CD300LF	ENSMUSG00000089753	Cd300ld2	ortholog_one2many
ENSG00000186074	ENST00000583937	CD300LF	ENSMUSG00000089753	Cd300ld2	ortholog_one2many
ENSG00000186074	ENST00000464910	CD300LF	ENSMUSG00000089753	Cd300ld2	ortholog_one2many
ENSG00000186074	ENST00000462044	CD300LF	ENSMUSG00000089753	Cd300ld2	ortholog_one2many
ENSG00000186074	ENST00000581500	CD300LF	ENSMUSG00000089753	Cd300ld2	ortholog_one2many
ENSG00000186074	ENST00000583544	CD300LF	ENSMUSG00000089753	Cd300ld2	ortholog_one2many
ENSG00000186074	ENST00000343125	CD300LF	ENSMUSG00000089753	Cd300ld2	ortholog_one2many
ENSG00000186074	ENST00000361254	CD300LF	ENSMUSG00000089753	Cd300ld2	ortholog_one2many
ENSG00000186074	ENST00000326165	CD300LF	ENSMUSG00000069607	Cd300ld3	ortholog_one2many
ENSG00000186074	ENST00000469092	CD300LF	ENSMUSG00000069607	Cd300ld3	ortholog_one2many
ENSG00000186074	ENST00000301573	CD300LF	ENSMUSG00000069607	Cd300ld3	ortholog_one2many
ENSG00000186074	ENST00000583937	CD300LF	ENSMUSG00000069607	Cd300ld3	ortholog_one2many
ENSG00000186074	ENST00000464910	CD300LF	ENSMUSG00000069607	Cd300ld3	ortholog_one2many
ENSG00000186074	ENST00000462044	CD300LF	ENSMUSG00000069607	Cd300ld3	ortholog_one2many
ENSG00000186074	ENST00000581500	CD300LF	ENSMUSG00000069607	Cd300ld3	ortholog_one2many
ENSG00000186074	ENST00000583544	CD300LF	ENSMUSG00000069607	Cd300ld3	ortholog_one2many
ENSG00000186074	ENST00000343125	CD300LF	ENSMUSG00000069607	Cd300ld3	ortholog_one2many
ENSG00000186074	ENST00000361254	CD300LF	ENSMUSG00000069607	Cd300ld3	ortholog_one2many
ENSG00000186074	ENST00000326165	CD300LF	ENSMUSG00000089722	Cd300ld5	ortholog_one2many
ENSG00000186074	ENST00000469092	CD300LF	ENSMUSG00000089722	Cd300ld5	ortholog_one2many
ENSG00000186074	ENST00000301573	CD300LF	ENSMUSG00000089722	Cd300ld5	ortholog_one2many
ENSG00000186074	ENST00000583937	CD300LF	ENSMUSG00000089722	Cd300ld5	ortholog_one2many
ENSG00000186074	ENST00000464910	CD300LF	ENSMUSG00000089722	Cd300ld5	ortholog_one2many
ENSG00000186074	ENST00000462044	CD300LF	ENSMUSG00000089722	Cd300ld5	ortholog_one2many
ENSG00000186074	ENST00000581500	CD300LF	ENSMUSG00000089722	Cd300ld5	ortholog_one2many
ENSG00000186074	ENST00000583544	CD300LF	ENSMUSG00000089722	Cd300ld5	ortholog_one2many
ENSG00000186074	ENST00000343125	CD300LF	ENSMUSG00000089722	Cd300ld5	ortholog_one2many
ENSG00000186074	ENST00000361254	CD300LF	ENSMUSG00000089722	Cd300ld5	ortholog_one2many
ENSG00000102805	ENST00000636183	CLN5	ENSMUSG00000022125	Cln5	ortholog_one2many
ENSG00000102805	ENST00000636780	CLN5	ENSMUSG00000022125	Cln5	ortholog_one2many
ENSG00000102805	ENST00000485938	CLN5	ENSMUSG00000022125	Cln5	ortholog_one2many
[truncated: 163,449 more rows]
