# Supplementary material for: Comparative transcriptomic analysis reveals translationally relevant processes in mouse models of malaria
Source: eLife. 2022 Jan 10;11:e70763. doi: 10.7554/eLife.70763 (PMC8747512; doi:10.7554/eLife.70763)
Supplement: Supplementary file 10. [file elife-70763-supp10.xlsx]

## Sheet: Key
Supplementary File 10 The results of the CHMI microarray dataset differential expression analysis
Table Column Names Key
Description: The results of the differential expression Analysis of the CHMI microarray study. logFC values are given relative to the more severe phenotype (when first symptoms developed). This analysis was performed with adjustment for cell type proportion variation.
Gene	Gene symbol
logFC	log fold-change
Pvalue	p-values
FDR	false discovery rate corrected p-values

## Sheet: First symptoms-before infection
Gene	logFC	PValue	FDR
LOC101927153	-0.978308	2.0239e-06	0.0397118
TIGD2	-0.473732	3.44466e-06	0.0397118
KLRC1	-0.561532	1.03283e-05	0.0428622
FBXL13	-0.560863	1.03463e-05	0.0428622
GRAMD1C	-0.879035	1.08914e-05	0.0428622
ASPRV1	0.446896	1.12666e-05	0.0428622
KCNA1	0.364625	1.30128e-05	0.0428622
SCARF1	0.592006	1.87532e-05	0.0434491
RP11-563N6.6	-0.689607	2.01019e-05	0.0434491
TRIM5	0.465277	2.66252e-05	0.0434491
RNU6-1262P	-0.537409	2.86234e-05	0.0434491
FFAR2	0.793671	3.26118e-05	0.0434491
CSF2RB	0.490723	3.41083e-05	0.0434491
RP11-187C18.2	-0.612627	3.49534e-05	0.0434491
SCO2	0.426174	4.04129e-05	0.0434491
KCNJ15	0.932284	4.24698e-05	0.0434491
ATF3	0.546028	4.33054e-05	0.0434491
IFI6	0.770508	4.60087e-05	0.0434491
KIAA0226L	-0.453603	4.87116e-05	0.0434491
OAS3	1.48073	4.92601e-05	0.0434491
ANXA2	0.443121	5.51173e-05	0.0434491
AHCTF1P1	-0.349922	5.62113e-05	0.0434491
CARD17	1.69501	5.7651e-05	0.0434491
MX1	1.11774	5.82523e-05	0.0434491
RSAD2	2.32527	6.11378e-05	0.0434491
ETV7	1.18157	6.27055e-05	0.0434491
RP11-295G20.2	0.559325	6.39627e-05	0.0434491
AK4P3	0.478532	6.43154e-05	0.0434491
MIR4451	-0.482539	6.45654e-05	0.0434491
P2RY14	1.69163	6.51981e-05	0.0434491
ANXA2P2	0.477789	6.57455e-05	0.0434491
LGALS3BP	0.820732	6.65842e-05	0.0434491
TIFA	1.26247	7.02008e-05	0.0434491
KLRC4-KLRK1	-0.65998	7.35597e-05	0.0434491
GADD45B	0.736348	7.43009e-05	0.0434491
RNU6-701P	-0.765502	7.45514e-05	0.0434491
CALR	0.389917	7.55691e-05	0.0434491
A2M-AS1	-0.597675	7.61503e-05	0.0434491
AC002511.2	0.385261	7.7351e-05	0.0434491
HIST1H4H	0.720274	7.92736e-05	0.0434491
SLAMF7	0.983904	7.95754e-05	0.0434491
CD274	2.07334	7.99535e-05	0.0434491
RP11-575L7.8	-0.583425	8.16728e-05	0.0434491
PECAM1	-0.577423	8.38517e-05	0.0434491
IFIH1	0.869281	8.50406e-05	0.0434491
TNFAIP6	1.45419	8.66833e-05	0.0434491
TAP2	0.580932	9.2973e-05	0.0443186
IL1RN	0.80337	9.39037e-05	0.0443186
SMCO4	0.593684	9.41844e-05	0.0443186
IFIT1	1.65159	9.84321e-05	0.0448266
MVP	0.442526	9.91523e-05	0.0448266
HERC5	1.56944	0.000101611	0.0450549
RARRES3	1.03053	0.000107583	0.0458233
PML	0.85242	0.000108376	0.0458233
ZC3H12A	0.279808	0.000110915	0.0458233
ILK	0.346675	0.000118181	0.0458233
XAF1	0.74332	0.000118463	0.0458233
RNA5SP169	0.584144	0.00011888	0.0458233
RP3-323N1.2	-0.564889	0.000120985	0.0458233
PSMB9	0.670639	0.000124021	0.0458233
MOV10	0.66864	0.000131471	0.0458233
IFI44L	2.18898	0.000133188	0.0458233
DUSP3	0.418825	0.000134099	0.0458233
BCL3	0.474131	0.000136021	0.0458233
MIR378E	-0.446846	0.000143931	0.0458233
IRF7	0.531052	0.000145176	0.0458233
FCGR1A	2.16178	0.000145771	0.0458233
LAMP3	1.30285	0.000146196	0.0458233
RNU6-242P	-0.563053	0.000147068	0.0458233
MS4A1	-0.358033	0.000151096	0.0458233
MYOF	1.43985	0.000154082	0.0458233
IDO1	1.84536	0.000164226	0.0458233
TAP1	0.828553	0.000164843	0.0458233
PLSCR1	1.20617	0.000165108	0.0458233
LY6E	0.858436	0.000166013	0.0458233
LOC285173	0.377599	0.000166982	0.0458233
NPL	-0.332132	0.000170155	0.0458233
RNU6-563P	-0.496702	0.000170327	0.0458233
IFIT3	1.53888	0.000173647	0.0458233
RNF141	-0.485018	0.000174309	0.0458233
DOCK5	-0.403148	0.000175163	0.0458233
EPSTI1	1.34642	0.000183112	0.0458233
AGO1	-0.453177	0.000185125	0.0458233
KCNJ2-AS1	0.583195	0.000187601	0.0458233
LDLR	0.418695	0.000188173	0.0458233
ANKRD20A11P	-0.616586	0.000189984	0.0458233
COX6A1P2	0.351414	0.000191038	0.0458233
COX6A1	0.387568	0.000193793	0.0458233
MTHFD2	0.62374	0.000195037	0.0458233
IFI35	0.999168	0.0001977	0.0458233
OAS2	1.14713	0.000198273	0.0458233
GPR84	1.12001	0.000202427	0.0458233
IFI44	1.67176	0.000203815	0.0458233
TAPBP	0.389031	0.000207713	0.0458233
GBP6	1.24177	0.000207802	0.0458233
RGS2	-0.680845	0.000212115	0.0458233
PARP12	0.714755	0.000212421	0.0458233
AGAP7P	-0.647884	0.000212599	0.0458233
IRF1	0.64364	0.000213319	0.0458233
GBP4	1.65057	0.000213379	0.0458233
FCER1G	0.507887	0.000214283	0.0458233
APOL1	0.850918	0.00021578	0.0458233
MIR1537	-0.639544	0.000216602	0.0458233
OAS1	1.06539	0.000217136	0.0458233
ZBP1	0.527614	0.000217893	0.0458233
RP4-655J12.5	-0.386558	0.000218584	0.0458233
LOC102724190	-0.514198	0.000221329	0.0458233
OASL	0.965774	0.000221732	0.0458233
KCNJ2	0.90343	0.000222958	0.0458233
RHBDF2	0.541475	0.000223399	0.0458233
RP11-553K8.5	-0.600004	0.000225704	0.0458233
RNASET2	-0.43084	0.000227028	0.0458233
GBP5	1.59142	0.000229987	0.0458233
ANKRD22	2.4746	0.000230596	0.0458233
SERPING1	2.18266	0.000231235	0.0458233
ADAM28	-0.452218	0.000231794	0.0458233
LPCAT2	0.860604	0.000233949	0.0458233
CTGLF12P	-0.634292	0.000236826	0.0458233
FCGR1C	2.10723	0.000237161	0.0458233
PSME1	0.631369	0.000239943	0.0458233
CMPK2	0.906474	0.000240475	0.0458233
TRAFD1	0.781061	0.000244136	0.0461396
SNRK-AS1	-0.544223	0.000247962	0.0464818
TTTY10	-0.291758	0.000250964	0.0466652
SGK1	-0.583555	0.000255976	0.0472163
STAT2	0.962556	0.00026327	0.0480473
IL1R1	-0.346652	0.000264649	0.0480473
KREMEN1	0.756444	0.000266837	0.0480661
CXCL10	2.63233	0.000270452	0.0483395
LACTB	0.754886	0.000275105	0.048793
PSMB8	0.519194	0.000280972	0.0489148
GK	0.722464	0.000282974	0.0489148
NPC2	0.537634	0.000285252	0.0489148
HCAR3	0.969856	0.000287074	0.0489148
SLC35A4	0.353186	0.000287869	0.0489148
CEACAM1	1.38422	0.000291572	0.0489148
SOCS3	0.565391	0.000294819	0.0489148
RP11-504P24.4	-0.612086	0.000296878	0.0489148
DOCK4	0.844501	0.000300741	0.0489148
LRMP	-0.325943	0.000304911	0.0489148
TMCC1	-0.278398	0.000307022	0.0489148
APOL3	0.654772	0.000307457	0.0489148
CTD-2134P3.1	-0.30319	0.000308308	0.0489148
LIMK2	0.574427	0.000313578	0.0489148
GCH1	1.23685	0.000315234	0.0489148
APOL6	0.838463	0.000315929	0.0489148
ALAS2	0.815361	0.000317733	0.0489148
CYBB	0.479171	0.0003195	0.0489148
KATNBL1	-0.464617	0.000320098	0.0489148
AC002117.1	-0.711814	0.000321612	0.0489148
SH3BP5-AS1	-0.644002	0.000324023	0.0489148
OR56B1	0.751521	0.000324288	0.0489148
TARP	-0.453255	0.000326029	0.0489148
MIR548W	-0.850685	0.000326809	0.0489148
GBP1P1	1.56845	0.000328828	0.0489148
CES1	0.546447	0.000334023	0.0492613
AGAP4	-0.55631	0.000335801	0.0492613
GBP1	1.64424	0.000337567	0.0492613
FBXL20	-0.427334	0.00034279	0.0497088
PIM2	0.498064	0.000347721	0.0501088
SRPK2	-0.437498	0.000352211	0.0504405
RNU6-707P	-0.694271	0.00035736	0.0505288
RNU7-22P	-0.54269	0.000360685	0.0505288
HLA-DRB3	0.427156	0.000361198	0.0505288
UBE2L6	0.883471	0.000361593	0.0505288
LUCAT1	-0.403461	0.000364583	0.0506397
KLRF1	-0.728758	0.000370334	0.051007
CXCL9	1.1425	0.000371652	0.051007
SNORA23	-0.565386	0.000386273	0.0510537
DICER1	-0.430648	0.000386965	0.0510537
DDX60	1.11633	0.000387627	0.0510537
NOD2	0.329556	0.000387664	0.0510537
IRG1	0.87632	0.000388346	0.0510537
IFI27	0.836563	0.0003891	0.0510537
TAS2R14	-0.549501	0.000391305	0.0510537
AGAP6	-0.591731	0.000393581	0.0510537
ANXA2P3	0.408805	0.000395816	0.0510537
IFIT2	1.11627	0.000399046	0.0510537
RP11-14I17.2	-0.353883	0.000401684	0.0510537
LOC100506544	0.358202	0.000405044	0.0510537
AFF1	0.441678	0.000405237	0.0510537
DTX4	-0.347127	0.000405566	0.0510537
NUPR1L	0.465489	0.000407962	0.0510537
GABPB1-AS1	-0.366134	0.000411645	0.0510537
DPY19L3	-0.286403	0.000412358	0.0510537
USP18	0.467277	0.000412984	0.0510537
BPI	0.430827	0.000415521	0.0510537
RNU6-936P	-0.606769	0.000416277	0.0510537
FCAR	0.306179	0.000418968	0.0511119
MPPE1	-0.298549	0.000425544	0.0514703
PIK3AP1	0.482133	0.00042637	0.0514703
NUCB1	0.565278	0.00043653	0.0524223
DGCR11	-0.364883	0.000443925	0.0530341
ISG15	0.452618	0.000447445	0.0531133
C9orf156	-0.283116	0.000449662	0.0531133
PARP14	1.03881	0.000454617	0.0531133
SLC6A6	-0.383502	0.000455125	0.0531133
TLR7	0.572701	0.000462588	0.0531133
TRAJ19	-1.07641	0.000464186	0.0531133
LAP3	1.19946	0.000466249	0.0531133
AC012363.4	1.0847	0.00046723	0.0531133
RP11-723D22.2	-0.485777	0.000467256	0.0531133
CTD-2046I8.1	0.334621	0.000468779	0.0531133
MIR1200	-0.490277	0.000469977	0.0531133
RP5-837I24.6	-0.293326	0.000472231	0.0531133
RNA5SP214	0.680764	0.000478576	0.0534436
LOC389834	-0.439999	0.000479803	0.0534436
RNU6-668P	-0.65206	0.000492172	0.0544309
ANXA4	0.301695	0.000493388	0.0544309
HIST1H2BK	0.493291	0.000499877	0.0548842
POMP	0.482895	0.000504793	0.0551612
WARS	1.05049	0.000509313	0.0551618
EFCAB2	0.668405	0.000509583	0.0551618
KIAA1468	-0.432065	0.000515994	0.0555594
MIR192	0.278172	0.000518076	0.0555594
SORT1	0.722157	0.00052784	0.0560039
MICB	0.502936	0.000528218	0.0560039
TMEM109	0.365811	0.000532275	0.0560039
TUBBP1	0.320506	0.000532283	0.0560039
PSME2	0.895102	0.000544155	0.0560039
HCAR2	0.951538	0.000545415	0.0560039
ANKRD20A3	-0.286676	0.000551852	0.0560039
FAM177B	-0.275577	0.000551953	0.0560039
ARSG	-0.334042	0.000552762	0.0560039
ADM	0.348749	0.000555208	0.0560039
AC090627.1	-0.840162	0.000559428	0.0560039
SHISA5	0.34905	0.000560833	0.0560039
IFIT5	0.921699	0.00056171	0.0560039
LOC101929683	-0.30094	0.000561931	0.0560039
HIST1H2BJ	0.302748	0.000564862	0.0560039
IFITM1	0.381607	0.000568423	0.0560039
MTAP	-0.246194	0.000572986	0.0560039
ATP1B2	0.443643	0.000575914	0.0560039
AC079630.4	0.877419	0.000576408	0.0560039
MIR1299	-0.898972	0.000579768	0.0560039
SAMD9L	1.0811	0.000580336	0.0560039
PSENEN	0.579667	0.000580412	0.0560039
ANXA2P1	0.394164	0.000582816	0.0560039
IL1B	0.599171	0.000585314	0.0560039
CNDP2	0.689971	0.000585974	0.0560039
RNF213	0.736202	0.000589709	0.0560039
MIR644A	-0.623766	0.000592305	0.0560039
DDX58	0.926623	0.00059243	0.0560039
SNX20	0.521333	0.000593078	0.0560039
PARP9	0.998894	0.000595088	0.0560039
GBP3	1.08923	0.000601301	0.0563455
ALDH1A1	0.561707	0.000603606	0.0563455
SECTM1	0.789306	0.000617294	0.05642
KLHDC7B	0.527731	0.000618274	0.05642
TUBA1B	0.360144	0.000618327	0.05642
PSMB10	0.336118	0.000618346	0.05642
MIR548A2	-0.419538	0.000618457	0.05642
ICAM1	0.833521	0.000619086	0.05642
IFI16	0.595336	0.000634459	0.0575934
CMTR1	0.484292	0.000647979	0.0582082
PKM	0.275804	0.000648454	0.0582082
MR1	0.496983	0.000649943	0.0582082
LGALS9	0.545708	0.000653061	0.0582082
MANSC1	-0.41686	0.000653854	0.0582082
C9orf91	0.525756	0.000664789	0.0587084
LOC100653061	-0.639466	0.000666718	0.0587084
DAPK1	-0.265193	0.000667112	0.0587084
ANXA3	1.12835	0.000680264	0.0594481
SNORA70G	-0.456854	0.000680674	0.0594481
TMSB10	0.32855	0.000684592	0.0595647
RP11-4C20.4	-0.438176	0.000692508	0.0599968
SPATS2L	0.587482	0.000696458	0.0599968
FRMD3	0.981304	0.000697365	0.0599968
LOC100507535	0.6196	0.000701941	0.060166
GRN	0.372346	0.000706732	0.0603523
LY75	-0.64395	0.000709945	0.0604029
ATP2B1	-0.607017	0.000717404	0.0608132
HELZ2	0.381279	0.000720429	0.0608459
RMI2	0.426655	0.000743502	0.0625654
STXBP5	-0.509956	0.000746372	0.0625785
RIPK2	0.808275	0.000752824	0.0628825
LOC100287934	-0.349463	0.000760287	0.0628825
HLA-DRB1	0.342665	0.000762194	0.0628825
CD1C	-0.448763	0.000767283	0.0628825
TMEM150B	0.439806	0.000775445	0.0628825
CCDC84	-0.354599	0.000778394	0.0628825
PSME2P2	0.842659	0.000779733	0.0628825
AOC2	-0.433145	0.000780166	0.0628825
SLC26A8	0.731064	0.00078232	0.0628825
PSTPIP2	1.13627	0.000783342	0.0628825
EDEM2	0.443932	0.000783445	0.0628825
LOC645513	-0.472547	0.000784217	0.0628825
HIATL1	0.509237	0.000785452	0.0628825
SCARNA3	-0.360993	0.000790743	0.063087
BST2	0.735685	0.000796268	0.0633088
DHX58	0.452178	0.000812175	0.0641221
AC010468.2	-0.678474	0.000819027	0.0641221
IDH2	0.263249	0.000819591	0.0641221
MIR3690	-0.782529	0.000824214	0.0641221
SNORA5A	-0.443474	0.000825147	0.0641221
FLJ32255	0.738167	0.000825815	0.0641221
IL1RAP	-0.400038	0.000825965	0.0641221
STAT1	0.941375	0.000831029	0.0642988
CARD16	0.516711	0.000846864	0.0651212
VPS9D1	0.345431	0.000857031	0.0651212
ANKRD10-IT1	-0.561066	0.000859817	0.0651212
APOL2	0.739934	0.000861504	0.0651212
AFF3	-0.272645	0.000862371	0.0651212
MIR324	0.458197	0.000862572	0.0651212
LMNB1	0.571434	0.000863558	0.0651212
VPS8	-0.407	0.000864253	0.0651212
CHMP5	0.591226	0.000869471	0.0651809
AURKAPS1	-0.3955	0.000870699	0.0651809
MCEMP1	0.43916	0.000878982	0.0653984
GM2A	0.475113	0.000879278	0.0653984
MALAT1	-0.424864	0.000887228	0.0654574
ANPEP	-0.461465	0.000887535	0.0654574
APOBEC3F	0.311493	0.000889916	0.0654574
RGPD8	-0.519044	0.000891426	0.0654574
RPE	-0.532031	0.000894734	0.0654917
FCGR1B	1.01059	0.000898953	0.0654987
FCRL1	-0.357194	0.000902053	0.0654987
AVPI1	0.257765	0.000903352	0.0654987
PGM2	-0.311518	0.000910738	0.0657004
TRAJ38	-0.634987	0.000911833	0.0657004
SLC43A3	0.285991	0.000918316	0.0657101
SEPT7P9	-0.240972	0.000918759	0.0657101
DTX3L	0.782204	0.000920517	0.0657101
LINC00921	-0.434243	0.00093304	0.0663985
RP11-768B22.2	-0.4013	0.000945918	0.0670615
EIF2AK2	0.910638	0.000948174	0.0670615
LOC731424	0.582942	0.000959921	0.067208
FBXO6	0.53203	0.000962764	0.067208
USP30-AS1	0.556193	0.00096418	0.067208
AGAP9	-0.426377	0.000964301	0.067208
PRDX1	0.307554	0.000965325	0.067208
RRAS	0.387217	0.000969678	0.067208
LYST	-0.347289	0.00097065	0.067208
FOXP3	0.260486	0.000986999	0.0678087
KLF7-IT1	-0.473615	0.000987292	0.0678087
RBCK1	0.354824	0.00099094	0.0678087
PSMA4	0.55966	0.000991088	0.0678087
JAK2	0.561676	0.00100401	0.0683143
HDAC4	0.276264	0.00100526	0.0683143
PSMA6	0.577149	0.00100737	0.0683143
AHCTF1	-0.37908	0.00101167	0.0683803
RP11-380G5.2	-0.592125	0.00101539	0.0683803
DKFZp667F0711	-0.632626	0.00101724	0.0683803
CD38	0.603216	0.00102311	0.0684071
SOCS1	0.821538	0.00102519	0.0684071
RNU6-429P	-0.600575	0.00102654	0.0684071
LINC00282	0.658254	0.0010316	0.0685463
DPEP2	-0.582733	0.00103767	0.0687514
PRR11	0.492805	0.00104709	0.0691315
GRAMD1B	0.688017	0.00105075	0.0691315
PARP10	0.305599	0.001056	0.0691315
DNM1P46	0.275942	0.00105837	0.0691315
VAMP3	0.549273	0.00105911	0.0691315
TRBV5-3	0.362112	0.00106139	0.0691315
RNU6-1248P	-0.75333	0.0010765	0.0697405
ADAR	0.391608	0.00107778	0.0697405
SBNO2	0.335787	0.00108015	0.0697405
GNRH1	-0.277563	0.00108426	0.0697405
KY	-0.264654	0.0010883	0.0697405
PARP3	0.302635	0.00109014	0.0697405
TFEC	0.593497	0.00109192	0.0697405
LINC00852	-0.333616	0.00109562	0.0697834
PRRG4	1.1601	0.00109915	0.0698156
TCN1	0.461185	0.00110339	0.0698926
C6orf163	-0.356585	0.0011124	0.0702699
SNORD94	-0.477756	0.00112722	0.0705474
ABT1	0.263	0.00112857	0.0705474
A2M	-0.480504	0.0011289	0.0705474
TECRP1	0.317798	0.00113428	0.0705474
CASP5	0.816563	0.0011356	0.0705474
DGCR12	-0.468277	0.00113845	0.0705474
PLCB1	-0.424939	0.00114084	0.0705474
SQRDL	0.527727	0.00114127	0.0705474
ETHE1	0.281369	0.00114828	0.0706614
TNFSF10	0.748837	0.00114924	0.0706614
FRY	-0.429255	0.00115411	0.0707301
ABCC5	-0.386328	0.00115649	0.0707301
GOLGA8B	-0.553006	0.00116058	0.0707923
GTPBP1	0.334684	0.00117685	0.0715951
TMEM140	0.619415	0.00118497	0.0718996
NKTR	-0.535868	0.00118945	0.071947
DENND1A	0.283669	0.00119199	0.071947
LDHA	0.338438	0.00119617	0.0720107
MICU1	0.354493	0.00120153	0.0721452
GNB4	0.477385	0.00121532	0.0723334
LINC01232	0.422006	0.00122015	0.0723334
RN7SKP46	0.332316	0.00122186	0.0723334
SIN3B	-0.290915	0.00122337	0.0723334
ZNF767P	-0.347641	0.00122576	0.0723334
RNASEK	0.329333	0.0012263	0.0723334
TRIM69	0.30639	0.00122954	0.0723334
FAS	0.635212	0.00122976	0.0723334
RP11-403H13.1	-0.419694	0.00124276	0.0728662
RP13-16H11.5	-0.442104	0.00124514	0.0728662
RNU6-1084P	-0.63214	0.00125555	0.0732098
MYO9B	-0.221641	0.00125737	0.0732098
AIM2	0.966423	0.00126957	0.0737343
YWHAG	0.267227	0.00128343	0.0743131
IGF1R	-0.248202	0.00128822	0.0743131
IGIP	-0.346055	0.00128921	0.0743131
ERVK13-1	-0.405799	0.00129792	0.0746289
SPDYE6	-0.515431	0.00131433	0.0753846
RP11-10J21.4	-0.559326	0.0013233	0.0757103
MYBL1	-0.296747	0.00132816	0.0758006
MT1G	0.640727	0.00134396	0.0765127
LOC100506548	-0.370189	0.00135821	0.0769259
ANKRD36C	-0.738591	0.00136665	0.0769259
RNF24	0.326289	0.00136666	0.0769259
TDRD7	0.556171	0.00136903	0.0769259
STX11	0.749275	0.00136964	0.0769259
LOC101928020	-0.632082	0.00137123	0.0769259
RNU6-1145P	-0.725998	0.00137492	0.0769453
NBPF1	-0.394705	0.00137903	0.0769884
FCN1	0.288779	0.00138372	0.0770437
RNU7-77P	-0.303647	0.00139171	0.0770437
CNTNAP3B	-0.816589	0.00139255	0.0770437
RNU6-80P	-0.652633	0.00139677	0.0770437
DHRS9	0.899586	0.00140072	0.0770437
KIF1C	0.232142	0.00140116	0.0770437
RNU105B	-0.356405	0.00140341	0.0770437
SLAMF8	1.20061	0.00140836	0.0771321
IL1R2	-0.487274	0.00142503	0.0776807
APOL4	0.407578	0.00142959	0.0776807
MIR548O2	-0.617401	0.00143001	0.0776807
TAS2R43	-0.481629	0.00143324	0.0776807
CTSA	0.345177	0.00143523	0.0776807
EEPD1	-0.255145	0.00144704	0.077806
NRM	0.268313	0.00144762	0.077806
PLEK	0.652957	0.00144792	0.077806
DPYSL2	0.297658	0.00145227	0.077806
2004-09-01	0.732045	0.00145441	0.077806
DDX60L	0.607946	0.00150113	0.0801194
IGHA1	-0.381218	0.00151821	0.0805815
PPP4R1	-0.330875	0.00151841	0.0805815
RNU6-1024P	-0.342559	0.00152601	0.0805815
GOLGA8A	-0.527489	0.00152649	0.0805815
GLRX	0.314288	0.00152745	0.0805815
MIR548D1	-0.463327	0.00153355	0.0805815
STMN1	0.323536	0.00153425	0.0805815
HIST2H2AA4	0.431476	0.00154247	0.0807626
LOC100129550	-0.562308	0.00154471	0.0807626
ARL2	0.319906	0.00155656	0.0811248
HLA-DQA2	0.44622	0.00155867	0.0811248
SNX18	-0.320244	0.00156869	0.0814623
SP140	0.631846	0.00157342	0.0815243
APOBEC3G	0.322009	0.00157958	0.0816599
GBP2	0.893221	0.00159197	0.0821163
TFG	0.301394	0.00159655	0.0821691
IFNGR1	-0.291002	0.0016063	0.082447
XXYLT1-AS2	0.63156	0.00161545	0.082447
AGAP5	-0.386512	0.00162338	0.082447
MT1IP	0.405301	0.00162721	0.082447
C1GALT1C1	0.235857	0.0016281	0.082447
FAM26F	0.316747	0.00163097	0.082447
C5AR2	-0.336042	0.00163656	0.082447
ADAM19	-0.257877	0.00163982	0.082447
ATP5D	0.397166	0.001643	0.082447
RN7SKP26	0.514416	0.00164456	0.082447
ARGLU1	-0.395434	0.00164693	0.082447
HLA-DRA	0.267632	0.00164934	0.082447
NUB1	0.509208	0.00164947	0.082447
OGT	-0.442492	0.00165201	0.082447
HLA-DPA1	0.373955	0.00166759	0.0830446
NBPF9	-0.394225	0.00168494	0.0833724
DNAJA1P5	0.255192	0.00168632	0.0833724
KLRG1	-0.451674	0.00168856	0.0833724
LINC00612	-0.50774	0.00169064	0.0833724
RNU6-10P	-0.564421	0.00169225	0.0833724
CD63	0.238891	0.00170299	0.0836159
TRIM21	0.697635	0.00170673	0.0836159
RRN3P2	-0.452358	0.00170808	0.0836159
IGFLR1	0.299612	0.00172081	0.083833
WSB2	0.394283	0.00172297	0.083833
GTF2IRD2	-0.283815	0.00172342	0.083833
TTLL4	-0.224643	0.00173477	0.0842074
PLIN3	0.314232	0.0017432	0.0844388
RNU6-26P	-0.681114	0.00174883	0.084464
SAMHD1	0.395395	0.00175264	0.084464
SCARNA4	-0.383831	0.00175471	0.084464
SNORA38B	-0.413252	0.0017611	0.0845953
RNU6-623P	-0.588244	0.00177379	0.0850276
COX8A	0.628448	0.00178025	0.0851604
CYP27A1	-0.335939	0.00178595	0.0852559
PPP1R12B	-0.305145	0.00179613	0.0854351
TNFSF13B	0.55947	0.00179711	0.0854351
ECRP	0.588998	0.00180106	0.0854467
EMR3	-0.395618	0.00180907	0.0855321
ITPKB-AS1	-0.352833	0.00181245	0.0855321
AGPAT3	0.252181	0.00181485	0.0855321
CD40	0.36234	0.00182363	0.0855321
TESK2	0.409385	0.00182488	0.0855321
MIR548AN	-0.607838	0.00182512	0.0855321
FCRL2	-0.246214	0.00185839	0.0869145
VAMP5	0.492006	0.00186869	0.0869968
IL12RB1	0.296414	0.00187302	0.0869968
CD163	-0.328579	0.00188572	0.0869968
FAM212B	-0.406257	0.00188677	0.0869968
ZSCAN29	-0.22455	0.00188822	0.0869968
OGFRL1	-0.406299	0.00188826	0.0869968
LOC101059961	-0.395827	0.00189201	0.0869968
AC005104.3	-0.407043	0.00189674	0.0869968
ALAS1	0.381857	0.0019	0.0869968
SLC22A4	0.308828	0.00190235	0.0869968
CD74	0.355584	0.00190391	0.0869968
SULF2	-0.386878	0.00190542	0.0869968
USP41	0.302305	0.00191804	0.0873996
LY96	0.572736	0.00192337	0.0874699
LOC101929331	-0.358862	0.00193152	0.0875288
SNTB1	0.316068	0.00193226	0.0875288
MRPS25	-0.333977	0.00194466	0.0879121
RNU6-1011P	-0.609764	0.00194835	0.0879121
GNG5	0.269679	0.00195515	0.0880466
NBPF16	-0.390271	0.0019822	0.0889966
LOC374443	-0.247479	0.00198396	0.0889966
PLGLA	-0.343168	0.00200595	0.0892231
RNU7-35P	-0.547636	0.00200775	0.0892231
NBN	0.570855	0.00201083	0.0892231
ERGIC1	-0.322614	0.00201187	0.0892231
CCDC144B	-0.511978	0.0020166	0.0892231
LOC100129936	-0.265087	0.00201697	0.0892231
MIR4295	-0.445255	0.00202108	0.0892231
CD93	-0.415544	0.00202122	0.0892231
C9orf64	0.212511	0.00202384	0.0892231
ELF4	0.331843	0.00204072	0.0897957
RNU6-82P	-0.763896	0.0020539	0.0902032
SCD	0.304412	0.00205781	0.0902034
LIMK1	0.331828	0.00207837	0.0909316
MRPL53	0.263375	0.00208948	0.0912446
LOC100272216	-0.534698	0.00209771	0.0912822
TRAJ2	-0.725795	0.00209965	0.0912822
ANP32A-IT1	-0.582637	0.00210222	0.0912822
IFI30	0.449011	0.00211165	0.0914821
RNA5SP386	-0.238987	0.0021159	0.0914821
DTHD1	-0.517208	0.00211872	0.0914821
LOC101928784	-0.291912	0.00213599	0.092055
RNU6-795P	-0.389744	0.00214122	0.0921083
RNU6-920P	-0.520056	0.00214558	0.0921241
RNU6-189P	-0.431057	0.00215872	0.0923476
AGO4	-0.271426	0.00216049	0.0923476
RNU6-820P	-0.504801	0.0021628	0.0923476
GUSBP2	-0.605138	0.0021777	0.0928119
APOBEC3D	0.268613	0.00220452	0.0937815
VCAN-AS1	-0.53417	0.00221709	0.0940533
HIST1H2BI	0.302052	0.00222232	0.0940533
DDIAS	0.516237	0.00223608	0.0940533
RNU6-580P	-0.568379	0.00223854	0.0940533
LYRM1	0.406302	0.00223929	0.0940533
FGF19	0.294971	0.00224377	0.0940533
RNU6-727P	-0.732582	0.00224493	0.0940533
MIR4677	-0.567554	0.00224571	0.0940533
LINC00656	-0.41582	0.00225861	0.0940533
RNU6-118P	-0.368099	0.00226048	0.0940533
DRAM1	0.446435	0.00226333	0.0940533
NAT8	0.495212	0.0022656	0.0940533
NT5C3A	0.477499	0.00227221	0.0940533
SNORD4B	-0.496322	0.00227964	0.0940533
DTL	0.413551	0.00228151	0.0940533
RP11-124O11.2	-0.346659	0.00228398	0.0940533
GUSBP3	-0.500302	0.00228545	0.0940533
MIR623	-0.452416	0.00229104	0.0940533
ZNF587	-0.219923	0.00229414	0.0940533
PRR5L	0.446639	0.00229442	0.0940533
RNU6-1016P	-0.735025	0.00230018	0.0940533
BANF1	0.321002	0.00230518	0.0940533
RP11-88I18.2	-0.422451	0.00230749	0.0940533
MIR4518	-0.281593	0.00230881	0.0940533
PSMB3	0.545189	0.00232153	0.0944048
HNRNPU-AS1	-0.748518	0.00233029	0.0945942
ARHGAP15	-0.493284	0.00234538	0.0950396
APOBEC3C	0.328073	0.00236156	0.0954055
MOB3C	0.251333	0.00236269	0.0954055
GOLGA8T	-0.246374	0.00236997	0.095532
LOC100506123	-0.440163	0.00237648	0.0956273
PTPN1	0.334088	0.00238099	0.0956419
SAMD4A	0.247271	0.00238894	0.0956752
PSMD8	0.279552	0.00239012	0.0956752
CCDC125	-0.267611	0.00241499	0.0961979
ITPKB	-0.423018	0.00241733	0.0961979
SNHG1	-0.457078	0.00241975	0.0961979
ERAP2	0.49003	0.00242287	0.0961979
RNU6-842P	-0.692993	0.00242732	0.0961979
RAB24	0.304112	0.00242821	0.0961979
RNU6-341P	-0.520526	0.00243716	0.0962957
RELA	0.282089	0.00243903	0.0962957
ATP6V0D1	0.280213	0.00244484	0.0963602
LYPLA2P2	0.241988	0.00245066	0.0964248
TPP1	0.297218	0.00246315	0.0967511
HEATR5A	-0.302787	0.00246913	0.0967802
HLX	0.421039	0.00247229	0.0967802
ABCA5	-0.495844	0.00249128	0.0970789
AC093110.3	-0.394413	0.00249467	0.0970789
COA6	0.228322	0.0024958	0.0970789
LINC00342	-0.418502	0.00249676	0.0970789
RTP4	1.05444	0.00250329	0.0971691
RP11-158J3.2	-0.298954	0.00250836	0.0972022
CNTNAP3	-0.622052	0.00251435	0.0972553
RFXAP	-0.351648	0.00252245	0.0972553
SNORD93	-0.530412	0.00252329	0.0972553
PLP2	0.275641	0.0025266	0.0972553
TIAM2	-0.354431	0.00253332	0.0973512
JAK3	0.286168	0.00253933	0.0974197
MIR1285-2	-0.357708	0.0025535	0.0978008
SPDYE2	-0.379322	0.00256172	0.0979529
RNU7-40P	0.65518	0.00257077	0.0981238
AGAP8	-0.337336	0.0025747	0.0981238
CYP1B1	-0.461953	0.00258089	0.0981516
CCR1	0.463958	0.00259557	0.0981516
BATF2	0.580018	0.00259564	0.0981516
MIR548AC	-0.42946	0.002597	0.0981516
SCARNA9	-0.574482	0.00260061	0.0981516
MAPK8	-0.272462	0.00260097	0.0981516
LOC285074	-0.315958	0.00262745	0.0989425
MYO5A	-0.281111	0.00263268	0.0989425
CHI3L1	-0.327816	0.00263864	0.0989425
TOR1B	0.44836	0.00264333	0.0989425
CLK4	-0.364348	0.00264727	0.0989425
MIR548H3	-0.510123	0.00264768	0.0989425
RP11-464F9.9	-0.519114	0.00266234	0.0991511
TRDJ1	-0.348429	0.00266536	0.0991511
SPDYE5	-0.404967	0.00267361	0.0991511
NBPF14	-0.345131	0.00267514	0.0991511
TUBGCP3	-0.272399	0.00267874	0.0991511
IFNG-AS1	-0.521456	0.00268317	0.0991511
EZH1	-0.297529	0.00268336	0.0991511
FAM49A	-0.294387	0.00269063	0.0992605
PDIA3	0.384776	0.00270609	0.0996716
C2	0.429358	0.00271421	0.0997068
GSTO1	0.235321	0.0027157	0.0997068
ATP1B3	0.356644	0.00273503	0.100257
PATL1	0.366777	0.00275849	0.100956
CSRP1	0.227424	0.0027727	0.101061
RNU6-21P	-0.655258	0.00277546	0.101061
LOC100093631	-0.510312	0.00277642	0.101061
ZNFX1	0.373542	0.00277887	0.101061
TMEM179B	0.432951	0.00278495	0.101122
SCARNA17	-0.361577	0.00279083	0.101176
DAPK2	-0.337262	0.0028021	0.101425
CPPED1	-0.284973	0.00280924	0.101524
KDM3A	-0.332164	0.00282942	0.10197
PLA2G4A	0.386485	0.00283041	0.10197
CCKAR	0.298733	0.00283861	0.101974
TARS	0.361165	0.00284018	0.101974
CD300A	0.312649	0.00285357	0.101974
KIZ	-0.288829	0.00285717	0.101974
DUSP5	0.324946	0.00285722	0.101974
NBPF11	-0.414778	0.00285896	0.101974
MSRB1	0.316326	0.00286148	0.101974
APOBEC3B	0.320915	0.00288979	0.10271
APPL2	-0.283047	0.00289105	0.10271
EMR2	-0.437788	0.00289774	0.10279
CCNL2	-0.340068	0.00290232	0.102794
MTMR10	-0.265196	0.00292036	0.103136
GK3P	0.427029	0.00292092	0.103136
ZFP36	0.344297	0.00294792	0.103634
MIR548X	-0.94127	0.00295009	0.103634
DPRXP4	-0.311637	0.00295028	0.103634
SUPT3H	-0.305587	0.002953	0.103634
C3AR1	0.569352	0.00296394	0.103859
TXLNGY	-0.598234	0.00297806	0.104056
GDPGP1	0.247615	0.00298367	0.104056
NPIPB8	-0.334973	0.00298709	0.104056
PSMC2	0.294457	0.0029876	0.104056
AARS	0.234222	0.00300875	0.104513
RNU4-25P	-0.338219	0.00300978	0.104513
MT1HL1	0.396275	0.00302393	0.104846
ETV6	0.323594	0.00304485	0.105268
KIF27	-0.474348	0.00304974	0.105268
FPR2	0.459892	0.00304979	0.105268
IL31RA	0.452612	0.00305545	0.105306
TIMM10	0.527041	0.0030704	0.105663
RNU6-1003P	-0.595687	0.00308744	0.105895
RNU6-348P	-0.449864	0.00309688	0.105895
PDIA6	0.210571	0.00309936	0.105895
TRIM6	0.234194	0.00309973	0.105895
UCP1	0.241935	0.00310712	0.105895
SNORA10	-0.391472	0.0031113	0.105895
LOC643792	-0.632914	0.00311316	0.105895
LMTK2	0.600154	0.00311717	0.105895
KLF5	0.646669	0.0031206	0.105895
MIR548H4	-0.430508	0.00312306	0.105895
RNU6-47P	-0.564774	0.0031411	0.10626
HMGN3	-0.238182	0.00314532	0.10626
IRF2	0.323559	0.00314764	0.10626
TSPAN17	0.238427	0.0031678	0.106628
WDFY1	0.560182	0.00317643	0.106628
FLJ38122	0.262529	0.00317962	0.106628
ANKRD36	-0.752317	0.00318118	0.106628
HIST1H3B	0.476299	0.00318448	0.106628
PLK1S1	-0.269463	0.00318777	0.106628
LOC100133315	-0.21391	0.00319092	0.106628
CTA-929C8.6	-0.28712	0.00320109	0.106775
ARL2-SNX15	0.237451	0.00320928	0.106775
MIR338	-0.408708	0.00321244	0.106775
SNORD22	-0.471019	0.00321387	0.106775
MTF1	0.377041	0.00324291	0.10732
LINC00173	-0.298714	0.00324643	0.10732
AC103563.8	-0.312988	0.00325152	0.10732
HLA-DRB5	0.411141	0.00326834	0.10732
ARHGAP24	-0.231501	0.00326951	0.10732
KCNJ10	0.542706	0.00326983	0.10732
RNASE2	0.706165	0.00327154	0.10732
SMA5	-0.671622	0.00327184	0.10732
GNS	0.358401	0.00327472	0.10732
TARBP1	-0.276611	0.00328102	0.10732
WHAMMP1	-0.340198	0.00328896	0.10732
RNU6ATAC9P	0.400689	0.00328952	0.10732
TRGV2	-0.477931	0.00329076	0.10732
C20orf24	0.444454	0.00330541	0.107645
FLJ10038	-0.444302	0.00332159	0.10802
TRBV11-2	0.417091	0.00332807	0.108078
LOC100287221	-0.215594	0.00333316	0.108091
LRRC37A4P	-0.38597	0.00334151	0.108183
HNRNPF	0.289061	0.00335423	0.108183
LINC00861	-0.519415	0.00335473	0.108183
AMPD3	-0.278752	0.00336614	0.108183
RP11-782C8.5	-0.312886	0.00336797	0.108183
RNU6-44P	-0.567776	0.0033686	0.108183
AMPD2	-0.348649	0.00336884	0.108183
HMGN1P30	-0.297893	0.00338448	0.108534
ODF3B	0.331061	0.00339473	0.108711
KDELR1	0.228485	0.00341407	0.109179
RNU6-132P	-0.639663	0.00342843	0.109237
RNPC3	-0.359812	0.00343151	0.109237
CNIH4	0.426072	0.00343345	0.109237
ANXA5	0.306836	0.00343975	0.109237
MT1JP	0.622771	0.00344462	0.109237
TAS2R30	-0.723996	0.00344526	0.109237
ITPRIPL1	0.257591	0.00344903	0.109237
TNS3	0.222407	0.00347527	0.109917
PARP15	-0.461339	0.00348507	0.109936
PPIB	0.224925	0.00348743	0.109936
RNU6-271P	-0.39794	0.00349018	0.109936
SLC7A5P2	-0.308596	0.00351166	0.110462
C5orf56	0.302156	0.00352515	0.110735
TMEM60	0.376735	0.00353517	0.110898
ITGB7	0.191273	0.00354774	0.111052
ASGR2	0.218589	0.0035497	0.111052
SMA4	-0.54353	0.0035662	0.111417
NLRC5	0.272026	0.0035903	0.112018
RNU6-1316P	-0.587426	0.00359914	0.112142
CDCA8	0.261848	0.00360911	0.112301
LHFPL2	0.296807	0.00363287	0.112888
ALG3	0.310712	0.00364569	0.113134
IRS2	-0.717148	0.00365257	0.113195
ANKRD20A5P	-0.280186	0.00366299	0.113288
LOC101928054	-0.506924	0.0036654	0.113288
OLIG1	-0.325217	0.00367179	0.113334
PSMB2	0.284846	0.00367817	0.113379
RP11-414H23.3	-0.439071	0.00368971	0.113583
SRM	0.261281	0.00370541	0.113914
LOC646652	-0.465712	0.0037285	0.114272
DNAJC3-AS1	-0.334548	0.00374038	0.114272
AC008063.2	0.290764	0.00374718	0.114272
MRPL18	0.276564	0.00374955	0.114272
RNU6-32P	-0.524671	0.0037562	0.114272
RNU6-13P	-0.524671	0.0037562	0.114272
RNU6-12P	-0.524671	0.0037562	0.114272
BMX	1.02608	0.00375671	0.114272
NDUFB3	0.28005	0.00377303	0.11452
MERTK	-0.353375	0.0037748	0.11452
ORMDL1	-0.432083	0.00378696	0.114739
RP11-1145L24.1	-0.34983	0.00380655	0.115089
CEP85L	-0.424396	0.00381325	0.115089
TPMT	0.447517	0.00381349	0.115089
NLRP1	-0.391198	0.00382978	0.115429
MME-AS1	-0.578821	0.00386338	0.11629
BAZ1A	0.466967	0.003891	0.116825
MAGEL2	0.247558	0.00389128	0.116825
EGR1	0.306928	0.00390684	0.117018
GUSBP9	-0.562007	0.00390789	0.117018
SOD2	0.394955	0.00392108	0.117261
SIGLEC14	0.310928	0.00392625	0.117264
MIR4535	0.291389	0.00393279	0.117307
CASP4	0.451232	0.00395068	0.117562
RP11-561I11.2	-0.218834	0.00395153	0.117562
KIAA0753	-0.289481	0.00396009	0.117591
IKZF2	-0.278831	0.0039627	0.117591
LOC100132605	-0.312783	0.00396982	0.11765
MSMO1	0.37326	0.00404032	0.119337
GTF2IP1	-0.285082	0.00405051	0.119337
TLR10	-0.260848	0.00405167	0.119337
AC073130.3	-0.290241	0.00405183	0.119337
SESN1	-0.404586	0.00405471	0.119337
GPD2	0.302256	0.00405779	0.119337
RUNX2	-0.266552	0.00406803	0.11946
MT2A	0.923399	0.00407233	0.11946
TNFAIP3	0.420248	0.0040782	0.11948
CEP83	-0.29566	0.00409146	0.119717
TTC13	-0.341557	0.00410863	0.119779
PAXBP1	-0.350332	0.00410895	0.119779
NPHP3-ACAD11	-0.366444	0.00410916	0.119779
ATP5G2	0.179014	0.00411631	0.119835
PLGLB1	-0.325405	0.00413184	0.120003
ACSL1	0.341219	0.00413246	0.120003
RAB11FIP2	-0.237813	0.00414519	0.120221
RNU6-794P	-0.262724	0.00417267	0.120702
ATP6V1F	0.232458	0.00417392	0.120702
ZC3H3	0.246522	0.00417748	0.120702
HNRNPM	-0.271657	0.00419067	0.120932
TTC17	-0.289959	0.00422476	0.121763
BLVRA	0.245874	0.00423635	0.12192
GALM	0.560846	0.00424078	0.12192
GPCPD1	-0.495463	0.00425743	0.122246
ACTA2	0.299537	0.00426935	0.122388
S100A12	0.398738	0.00427297	0.122388
SREK1	-0.340508	0.00430548	0.123165
LUC7L	-0.306864	0.00431245	0.123207
MTRNR2L8	-0.368139	0.00431761	0.123207
AC004951.6	-0.405404	0.00434265	0.123768
C1orf61	0.218471	0.00437329	0.124387
DENND3	-0.246974	0.00437515	0.124387
FAM13A-AS1	-0.333997	0.00438847	0.12445
LIPN	-0.355425	0.00438956	0.12445
TIMM50	0.216006	0.00439496	0.12445
NBPF3	-0.342869	0.00440814	0.12445
E2F3-IT1	-0.308342	0.00442573	0.12445
CAPN3	-0.231075	0.00443739	0.12445
P2RX7	0.452013	0.00444084	0.12445
PRPS2	0.485582	0.00444665	0.12445
RNU6-166P	-0.704737	0.00444853	0.12445
AGAP11	-0.225884	0.00445272	0.12445
RP11-11N9.4	-0.315129	0.00445463	0.12445
FAM214A	-0.359468	0.0044568	0.12445
RNU6-151P	-0.498969	0.00446182	0.12445
BLOC1S1	0.266709	0.00447336	0.12445
MIR548AA2	-0.664118	0.00447879	0.12445
CUL1	0.459254	0.00448006	0.12445
ELMO2	0.317468	0.00448492	0.12445
RNA5SP319	0.510084	0.00449464	0.12445
ANKRD36B	-0.65419	0.00449712	0.12445
RNU6-890P	-0.576693	0.004499	0.12445
CX3CR1	0.418354	0.0045025	0.12445
MVB12A	0.230799	0.00450551	0.12445
IFITM4P	0.368576	0.00452268	0.12445
ERVK-7	0.281278	0.00452732	0.12445
USP3-AS1	-0.194675	0.00453032	0.12445
FAM8A1	0.36131	0.00453621	0.12445
ZCCHC2	0.547579	0.00454096	0.12445
GBP7	0.47846	0.00454188	0.12445
RASSF2	-0.240076	0.0045433	0.12445
MTMR4	0.214138	0.004546	0.12445
LHX4-AS1	-0.444796	0.0045534	0.12445
SULT1B1	-0.302057	0.00455993	0.12445
SNX29P2	-0.243945	0.00456029	0.12445
WDR73	-0.198603	0.00456088	0.12445
RNU6-603P	-0.285642	0.00456744	0.124482
WLS	-0.331055	0.00458077	0.124698
SIK3-IT1	-0.395097	0.00459842	0.125023
RP11-567N4.3	-0.281777	0.00460358	0.125023
PPP3CB-AS1	-0.27859	0.0046104	0.125061
GCNT2	0.183059	0.00461772	0.125112
LOC90246	0.279134	0.00463447	0.125419
LOC101927902	-0.235411	0.00465478	0.125744
WNK1	-0.308288	0.00465738	0.125744
GUK1	0.245338	0.00466374	0.125768
RRM2	0.371669	0.00467794	0.125988
NIN	-0.236562	0.00468809	0.125988
ACSL5	0.329711	0.00468829	0.125988
IDH1	0.26076	0.00469573	0.126041
PSMC4	0.249409	0.00470904	0.126251
LOC100289473	-0.283263	0.00471901	0.126312
RNF19B	0.369148	0.00472227	0.126312
HNRNPDL	-0.391154	0.00473517	0.126511
RP4-535B20.1	-0.260983	0.00474569	0.126645
TPRG1-AS1	0.365165	0.00475154	0.126655
KDM5D	-0.327543	0.00477781	0.127059
ALPK1	0.456177	0.00478531	0.127059
FCGR3A	0.227694	0.00478594	0.127059
EMP3	0.253748	0.0047919	0.127059
KIAA0247	0.239024	0.00479427	0.127059
CASP7	0.335284	0.00480996	0.127154
RP11-1252I4.2	0.247572	0.00481324	0.127154
SLC38A7	0.227152	0.0048144	0.127154
RNU6-558P	-0.694981	0.0048277	0.127256
IGSF6	0.37677	0.0048293	0.127256
TBXAS1	-0.25793	0.00484026	0.127399
ZNF318	-0.26343	0.00485268	0.127581
HSPA1B	0.390317	0.00486114	0.127658
EPB41L4A-AS1	-0.176168	0.00487033	0.127753
HSPBAP1	-0.352032	0.00487782	0.127804
CALCOCO2	0.282414	0.00488433	0.12783
BMS1P4	-0.27941	0.0049051	0.128228
ANKZF1	-0.332752	0.00491334	0.128298
LOC101926933	0.752742	0.00492317	0.128409
FLOT1	0.250904	0.00495798	0.129171
RP11-175I17.2	-0.305293	0.00497234	0.129399
HNRNPH2	0.32826	0.00498927	0.129595
FAM127B	0.242936	0.00499394	0.129595
HAPLN3	0.388977	0.00500046	0.129595
AC103563.9	-0.344257	0.00500235	0.129595
RABGGTB	-0.313155	0.00500828	0.129603
CTC-428G20.3	-0.440976	0.00502292	0.129626
NDUFS5	0.199007	0.00502392	0.129626
PARP11	0.505968	0.00502605	0.129626
GZMB	0.421349	0.00503508	0.129631
RAB4B	0.259345	0.0050375	0.129631
SNORD71	-0.72877	0.00505778	0.129835
HIST1H2AG	0.264945	0.00506298	0.129835
CLEC17A	-0.233069	0.0050653	0.129835
SELL	0.29789	0.00508088	0.129835
KLRD1	-0.376816	0.00508145	0.129835
HEG1	0.340888	0.00508874	0.129835
MICA	0.217918	0.0050896	0.129835
LINC00568	-0.254373	0.0050924	0.129835
GPR65	0.440291	0.00511099	0.129835
LOC101927209	-0.183462	0.00511272	0.129835
PLXNC1	-0.210238	0.00511911	0.129835
RHOA-IT1	-0.251753	0.00512078	0.129835
MYD88	0.323729	0.00512604	0.129835
DIRC2	-0.385232	0.0051334	0.129835
XRN1	0.663789	0.00513588	0.129835
SLC25A36	-0.30064	0.0051373	0.129835
RP11-156K13.1	0.22996	0.00514113	0.129835
ALPL	-0.694221	0.00516338	0.130254
HIST2H2BE	0.482191	0.00519001	0.130649
MT1X	0.502304	0.00519038	0.130649
ZNF438	0.444438	0.00519735	0.130682
TEKT4P2	-0.252099	0.00520929	0.130839
ACAP2-IT1	-0.414419	0.00521868	0.130857
AC004878.8	-0.305897	0.00522196	0.130857
PCNA	0.317591	0.00522702	0.130857
PADI2	0.314831	0.00524624	0.131196
LOC202025	-0.433023	0.00525797	0.131347
EIF4E3	0.236933	0.00527662	0.13167
RPGR	-0.357167	0.00528486	0.131727
NLRP12	-0.254673	0.00529032	0.131727
RALGAPA1	-0.26294	0.00530539	0.13196
TRANK1	0.561439	0.00532035	0.132094
MRPL21	0.215971	0.00532227	0.132094
ZMAT1	-0.481918	0.00533493	0.132266
LOC100132352	-0.331203	0.00535098	0.132364
LGALS1	0.247901	0.00535296	0.132364
GAB3	-0.294384	0.00535611	0.132364
ERLIN1	0.838009	0.00537608	0.132566
LONRF1	0.309729	0.00537806	0.132566
SMN2	-0.474313	0.00538673	0.132566
PLAUR	0.346013	0.00538747	0.132566
TYROBP	0.276354	0.00540403	0.132566
SIGLEC10	-0.393024	0.00540829	0.132566
FAM101B	-0.474249	0.00540886	0.132566
SNORD116-20	-0.893046	0.00541027	0.132566
NCAPH	0.211464	0.00544121	0.133183
NSUN7	-0.26443	0.00545676	0.133421
AC006947.1	0.214246	0.00546703	0.133472
RNU6-756P	-0.312774	0.00547041	0.133472
COX19	-0.206662	0.00549048	0.13379
ICT1	0.199763	0.00549503	0.13379
DPAGT1	0.231545	0.00551553	0.133907
GTF2I	-0.273234	0.00552069	0.133907
CAMK2G	-0.297914	0.00552175	0.133907
STAT5A	0.213938	0.00552495	0.133907
RP11-61L14.6	0.266331	0.00552887	0.133907
PLCB2	-0.304748	0.00554126	0.134066
DRAP1	0.234769	0.00555098	0.134127
SLC31A1	0.304906	0.00556747	0.134127
ZNF439	-0.236604	0.00557763	0.134127
CASZ1	0.215108	0.00557829	0.134127
TRMT11	-0.281645	0.00558422	0.134127
MIR604	-0.401491	0.00559048	0.134127
HIST1H3F	0.362495	0.00559233	0.134127
MT1B	0.510606	0.00559557	0.134127
HAL	-0.274545	0.00559612	0.134127
LPAR3	0.25387	0.0056137	0.134226
NAPSB	0.331713	0.00562013	0.134226
TAS2R60	-0.384928	0.0056241	0.134226
HIATL2	0.218991	0.00562506	0.134226
GOLGA8Q	-0.250812	0.00563242	0.134226
SNORD78	-0.74393	0.0056352	0.134226
GOLGA8J	-0.18952	0.00564351	0.134285
GSTK1	0.241505	0.00564942	0.134287
CDK2AP2	0.339734	0.00566421	0.134341
CREBZF	-0.376753	0.00566649	0.134341
SH2D3C	0.277469	0.00566916	0.134341
RP11-352D3.2	0.259442	0.0056758	0.13436
MIR550B1	-0.196011	0.00571569	0.135166
RNU6-19P	-0.387401	0.00572593	0.135269
KIAA0040	0.385493	0.00574927	0.13552
ATP6V0E1	0.269162	0.00575831	0.13552
SNORA71D	-0.324313	0.00575935	0.13552
RGS18	-0.44283	0.00577697	0.13552
SNORD14B	-0.559849	0.00578035	0.13552
PRAF2	0.246461	0.00578254	0.13552
ZBTB1	-0.23291	0.0057848	0.13552
SNORA49	-0.468889	0.00578897	0.13552
COX5B	0.184844	0.00579161	0.13552
ERICH1	-0.199541	0.00579531	0.13552
SNX30	-0.23321	0.00580675	0.13559
MLKL	0.552953	0.00581009	0.13559
LTBR	0.201862	0.00582248	0.135742
ARHGEF7-AS2	0.284606	0.00583552	0.135852
LINC00987	-0.350152	0.00583897	0.135852
APH1A	0.222039	0.00584756	0.135914
HLA-DRB6	0.270567	0.00588337	0.136609
RP11-274B18.2	-0.266628	0.0058914	0.136656
FAM46A	0.226119	0.00590085	0.136656
RNU6-650P	0.224558	0.00591068	0.136656
POLB	0.496414	0.00591651	0.136656
C5AR1	-0.31044	0.00591733	0.136656
LOC101929491	-0.566041	0.00592648	0.136656
UBE2DNL	0.238906	0.00592718	0.136656
GLIPR1	-0.233495	0.00593679	0.136656
CLMN	-0.271852	0.00593872	0.136656
NFKBIE	0.267976	0.00595571	0.13691
RP11-394A14.2	-0.276437	0.00599873	0.137546
RP1-39G22.5	-0.29703	0.00600099	0.137546
RNU6-24P	-0.481422	0.00600128	0.137546
AC073321.4	0.297248	0.00601455	0.137651
TRBV5-6	0.20666	0.00601781	0.137651
IL4I1	0.21612	0.00603823	0.1377
PIGL	-0.31752	0.0060409	0.1377
PCBD1	0.262526	0.00605408	0.1377
FCGR3B	0.287249	0.00605809	0.1377
ELK1	0.205339	0.00606424	0.1377
IFNG	0.408506	0.0060669	0.1377
NDUFA2	0.275995	0.00607362	0.1377
CASP1	0.404235	0.00608098	0.1377
MIR548D2	-0.532288	0.00608445	0.1377
LINC01093	0.264639	0.00608487	0.1377
RP11-569A11.1	-0.419183	0.00609059	0.1377
RIC8B	-0.243173	0.0060997	0.1377
RP4-620F22.2	1.27572	0.00610145	0.1377
ZBTB40	-0.266238	0.00610354	0.1377
CAPNS2	0.570378	0.00614045	0.138171
ANKFY1	0.372237	0.00614072	0.138171
MIR548AJ2	-0.285355	0.00614634	0.138171
FAM222B	0.252498	0.00615257	0.138171
RNU6-35P	-0.507765	0.00615862	0.138171
LSMEM1	-0.274528	0.00616037	0.138171
RNU6-331P	-0.30978	0.0061714	0.138284
LOC148709	0.278999	0.00618126	0.138313
SLC35G5	-0.200559	0.00618471	0.138313
RNU6-466P	-0.533607	0.00619412	0.138389
NAGA	0.187366	0.00620177	0.138426
ZNF586	-0.209767	0.00621908	0.138678
TLE1P1	-0.229904	0.00623305	0.138855
SNX29P1	-0.297981	0.00624524	0.138993
LRG1	0.374898	0.00626136	0.139175
MIR548G	-0.334177	0.00626551	0.139175
RP11-509J21.3	-0.224639	0.00627461	0.139243
AC114730.7	-0.215222	0.00629094	0.139471
SNORD14E	-0.573631	0.00629848	0.139504
TRBV6-9	0.310631	0.00631542	0.139736
EPS15L1	-0.308105	0.00632104	0.139736
AC073218.3	-0.45811	0.006332	0.139767
SHPRH	-0.309669	0.00633832	0.139767
RNU6-31P	-0.744921	0.00634063	0.139767
HSPB1	0.378004	0.00635226	0.139889
ATP2A2	0.257727	0.00638091	0.140386
SNORD12	-0.535243	0.00639886	0.140466
MIR548A3	-0.400984	0.00641147	0.140466
TRIM56	0.217792	0.00641476	0.140466
RAF1	-0.215726	0.00643298	0.140466
AHSA2	-0.387675	0.00643462	0.140466
TAF1D	-0.369312	0.00643626	0.140466
MIR4488	0.287772	0.00643649	0.140466
FAM13A	-0.207365	0.00643668	0.140466
TNF	0.316663	0.00643936	0.140466
ZNF154	-0.280232	0.00645477	0.140528
PTK2B	0.273129	0.0064554	0.140528
MIR4271	0.31953	0.00646888	0.140528
CASS4	-0.360424	0.00647487	0.140528
B4GALT5	0.453596	0.00648008	0.140528
CCNG2	-0.261673	0.00648388	0.140528
RPGRIP1	-0.219446	0.00648489	0.140528
HNRNPH1	-0.347719	0.00649728	0.140659
PPFIA1	-0.203497	0.00650314	0.140659
RAB33B	0.270047	0.00651723	0.140832
ZNF841	-0.281387	0.00655934	0.14152
CCDC144A	-0.29586	0.00656602	0.14152
RNA5SP68	-0.274869	0.00657746	0.14152
SLC37A1	0.245286	0.00658236	0.14152
ZNF516	-0.253222	0.00658464	0.14152
DGKG	-0.252151	0.0065859	0.14152
SLC27A3	0.18719	0.00662498	0.142227
SYK	-0.203153	0.00664415	0.142391
TRAPPC1	0.317974	0.00664495	0.142391
GPR52	-0.431807	0.00665867	0.142552
DPEP3	-0.318842	0.00667107	0.142685
LDOC1	0.200983	0.00669001	0.142879
MBD4	-0.253577	0.0066941	0.142879
FAM106CP	-0.287279	0.00670071	0.142879
MB21D1	0.4556	0.00670492	0.142879
TBL1X	-0.23508	0.00672183	0.143107
AGTRAP	0.224397	0.00674748	0.143521
LINC00694	0.313228	0.00676576	0.143758
CEP170P1	-0.269934	0.00677365	0.143758
LOC100129148	-0.311061	0.00677731	0.143758
SEMA3C	-0.193446	0.00682171	0.144463
XYLT1	-0.317558	0.0068303	0.144463
NPIPB11	-0.396622	0.00683222	0.144463
AC129492.6	0.269277	0.00684438	0.144463
MT1H	0.506431	0.00684912	0.144463
GRINA	0.325226	0.00685616	0.144463
SNRPC	0.19248	0.00686506	0.144463
IRAK2	0.378723	0.00686703	0.144463
RALB	0.287601	0.00687107	0.144463
HLA-J	0.173856	0.00687321	0.144463
TMEM185B	0.395796	0.00690018	0.144574
CTC-348L5.1	0.221609	0.00690451	0.144574
AC007556.3	0.404127	0.00690788	0.144574
CHMP2A	0.311655	0.00690898	0.144574
HIST1H2AB	0.220653	0.00691047	0.144574
SNORD107	-0.462297	0.00691615	0.144574
MAPK14	0.345657	0.006924	0.144608
KLF3	-0.233907	0.00693258	0.144648
RBM26	-0.371785	0.00694032	0.144648
EIF4G3	0.368348	0.00694487	0.144648
RXFP3	0.242048	0.00695101	0.144648
RNU6-73P	-0.467922	0.00696319	0.14477
CLEC6A	0.603301	0.00698185	0.145027
FAM96B	0.204237	0.00701148	0.145512
MIR146A	0.177966	0.00702331	0.145626
LOC101927015	0.303606	0.00704871	0.145993
RP11-574K11.5	-0.21844	0.00705368	0.145993
RFK	0.192756	0.00707364	0.146094
HIAT1	0.334533	0.00707704	0.146094
CSTB	0.209685	0.00707755	0.146094
TMX4	-0.257397	0.00708789	0.146177
CIRBP	-0.316192	0.00712221	0.146623
RNA5SP363	-0.439405	0.00712226	0.146623
ZNF600	-0.308276	0.00712869	0.146625
ZNF589	-0.253967	0.00714349	0.146676
HIST1H3J	0.283919	0.00714392	0.146676
HIST1H2BO	0.352262	0.00715463	0.146758
RNF114	0.263289	0.00716063	0.146758
PLEKHG3	-0.275513	0.00716821	0.146783
TUBG1	0.176515	0.00719652	0.147108
H1F0	0.33212	0.00719685	0.147108
SUGP2	-0.262398	0.00720364	0.147116
NDUFB6	0.215318	0.00722514	0.147425
LOC101927069	-0.378264	0.00723409	0.147477
LOC100507419	-0.232462	0.00724083	0.147484
CHST15	-0.217824	0.00726165	0.147728
RNU6ATAC33P	0.277784	0.00726913	0.147728
MIR1271	-0.405567	0.00727205	0.147728
LOC101927000	0.326421	0.00728508	0.147806
RNU6-1152P	-0.611984	0.00728869	0.147806
SFI1	-0.221862	0.00732924	0.148184
MIR4420	-0.393466	0.00733028	0.148184
TBC1D9	-0.339791	0.00733527	0.148184
C16orf80	0.221821	0.00733664	0.148184
FKBP4	0.516839	0.00734328	0.148184
MIR30E	-0.4529	0.0073459	0.148184
L3HYPDH	-0.207576	0.00736047	0.148348
BATF	0.202132	0.00737132	0.148437
RP4-798A10.4	0.191518	0.00741558	0.149111
GK-IT1	0.665235	0.00743954	0.149111
VAMP1	-0.289559	0.00744137	0.149111
CCRL2	0.569961	0.00744554	0.149111
CUBN	-0.247514	0.00744849	0.149111
RNU6-862P	-0.321827	0.00744883	0.149111
ZSCAN5B	0.205644	0.00745006	0.149111
FCRL5	-0.226607	0.00746392	0.149259
TLR5	0.383408	0.00749479	0.149605
RNU6-128P	-0.461696	0.00749878	0.149605
RCE1	0.183008	0.00750071	0.149605
RNU6-797P	-0.432339	0.00753389	0.14992
BAK1	0.219234	0.00753565	0.14992
RNASE6	-0.349638	0.00753597	0.14992
RRN3P1	-0.370031	0.00754436	0.149957
ZXDC	-0.223715	0.00755657	0.150001
CARD6	0.364615	0.0075644	0.150001
EIF2B2	0.203647	0.0075661	0.150001
HSP90AA1	0.454791	0.00757339	0.150017
RNU6-738P	-0.430427	0.00759548	0.150312
IKZF4	0.308088	0.00760243	0.150312
MIR2276	0.327924	0.00760782	0.150312
RPS6KA5	-0.355662	0.00764004	0.150727
RNU6-43P	-0.532091	0.00764192	0.150727
MT1F	0.514697	0.00766271	0.150736
RP11-278J6.3	-0.509106	0.00766568	0.150736
LOC102723927	-0.263026	0.00766705	0.150736
TGFB1	0.224079	0.00766853	0.150736
TTC14	-0.327958	0.00767864	0.150806
POLG2	-0.343871	0.00770461	0.151009
RP11-302L19.1	0.233461	0.00771608	0.151009
LOC101929592	-0.25087	0.00772647	0.151009
SNORA37	-0.375528	0.0077283	0.151009
RNF216	-0.234172	0.00773971	0.151009
RP11-597D13.8	-0.283154	0.00774292	0.151009
SOX21	0.236248	0.00776118	0.151009
GPR183	-0.391875	0.00776774	0.151009
SCARNA7	-0.527014	0.00776789	0.151009
PRKCQ-AS1	-0.501161	0.00776856	0.151009
PDE4B	0.348226	0.00777144	0.151009
BBS9	-0.218938	0.00777564	0.151009
ZC3HAV1	0.505553	0.00778216	0.151009
MLC1	0.182688	0.00779779	0.151009
MIR548I4	-0.268741	0.00779872	0.151009
PHF11	0.355801	0.00780114	0.151009
OSTN-AS1	-0.247037	0.00780446	0.151009
ZNF860	-0.32996	0.00781329	0.151009
EMR4P	-0.790303	0.00781585	0.151009
FKSG29	-0.577034	0.00782302	0.151009
NRAS	0.264735	0.00782653	0.151009
SMG1P5	-0.414701	0.00783397	0.151027
SLC6A12	0.294581	0.00785543	0.151125
COPE	0.388726	0.00785843	0.151125
GPR108	0.217793	0.00786921	0.151125
SNORD58A	-1.01601	0.00786961	0.151125
NPIPB6	-0.321852	0.00787183	0.151125
GSN	0.175536	0.00789842	0.151412
E2F8	0.195273	0.00789993	0.151412
TEP1	0.26688	0.00791068	0.151492
AUH	-0.285873	0.00792106	0.151565
SSFA2	0.323178	0.00796202	0.152031
SEC24D	0.282705	0.00796419	0.152031
CYP51A1	0.299535	0.00797372	0.152031
MIR4519	0.271101	0.00797887	0.152031
KIAA1407	-0.167688	0.00798563	0.152031
MAP3K3	-0.22918	0.00799193	0.152031
GOLGA8I	-0.173597	0.00799572	0.152031
TRPS1	-0.257616	0.00800089	0.152031
PRDM1	0.386542	0.00800764	0.152031
TRIM26	0.225201	0.00801137	0.152031
RNU4ATAC11P	-0.419644	0.00803	0.152255
EPHB1	-0.203756	0.00803634	0.152255
NUDT19	0.261831	0.0080434	0.152263
KRT73	-0.270185	0.00805181	0.152297
MAPK8IP3	-0.239928	0.008063	0.152338
WAC-AS1	-0.255809	0.00807598	0.152338
LOC440461	0.232248	0.00807745	0.152338
ZNF398	-0.219259	0.00808549	0.152338
CLIC4	0.251413	0.00808699	0.152338
EPG5	0.417773	0.008118	0.15271
IFITM2	0.266549	0.00812465	0.15271
CEP44	-0.199096	0.00812658	0.15271
RNU6-144P	-0.71085	0.00813578	0.152713
RP11-582J16.4	-0.399038	0.00814003	0.152713
CCNA2	0.388048	0.0081636	0.153031
SLC4A1	0.527336	0.00819048	0.153363
MIR3188	0.271732	0.00819751	0.153363
ATP6V0C	0.31389	0.00820209	0.153363
ACAD11	-0.288151	0.0082147	0.153363
MIR942	0.234044	0.00822838	0.153363
RNU6-1323P	-0.625233	0.00823485	0.153363
SPATA6	-0.386568	0.00823807	0.153363
RP11-763B22.4	-0.21475	0.00824049	0.153363
HBM	0.32432	0.0082412	0.153363
AC009495.2	0.389356	0.00827884	0.153823
TYMP	0.253222	0.00827925	0.153823
ZDHHC21	-0.234328	0.00829295	0.153833
FTX	-0.36612	0.00829311	0.153833
ARAP1	-0.251999	0.00834913	0.154748
WDFY4	-0.218876	0.00836193	0.15486
SMIM8	-0.288974	0.00837019	0.154889
DAPP1	0.474661	0.00839683	0.154952
ZNF44	-0.225176	0.00840216	0.154952
RNU6-41P	-0.520949	0.00840629	0.154952
XX-FW83128A1.2	0.241854	0.00841249	0.154952
TICAM1	0.22376	0.00842557	0.154952
TTN	-0.340847	0.00842946	0.154952
ARHGDIA	0.240074	0.00843075	0.154952
SAMD9	0.435513	0.00843269	0.154952
ZNF844	-0.297311	0.00843408	0.154952
RNU6-23P	-0.56198	0.00844995	0.15504
PLSCR3	0.2591	0.00845232	0.15504
UBE2D1	0.313335	0.00846509	0.155151
INTS5	0.211023	0.00850729	0.155792
FEM1C	0.315306	0.00851362	0.155792
BTN3A1	0.354924	0.00852658	0.155906
LINC00444	-0.233885	0.00853835	0.155997
RP11-327I22.5	-0.265876	0.00855334	0.156148
TRIM38	0.326067	0.00860306	0.156931
ZNF20	-0.169028	0.00862679	0.157239
JAGN1	0.226955	0.00863724	0.157257
ANXA2R	0.271457	0.00864138	0.157257
RNU6-249P	-0.387426	0.00865617	0.157402
SRP54-AS1	0.40225	0.00868098	0.157728
KIAA0226	0.256191	0.00869643	0.157792
PRPF39	-0.299993	0.00869819	0.157792
SNX10	0.377376	0.00871642	0.157999
FOXM1	0.217185	0.00873772	0.158261
RNU6-95P	-0.271121	0.00874729	0.15831
NFATC3	-0.242372	0.00876372	0.158413
ZNF354B	-0.230449	0.00876678	0.158413
FANCA	0.239033	0.00879966	0.158883
CXorf21	0.269532	0.00881334	0.158958
PAK1	0.224553	0.00883463	0.158958
RNU6-647P	-0.662288	0.00883861	0.158958
CSTA	0.2712	0.00884305	0.158958
OR52K1	0.346282	0.00884463	0.158958
NBPF7	-0.257155	0.00884639	0.158958
SP110	0.358278	0.00885207	0.158958
PRO0471	-0.758316	0.00886614	0.158983
CHST11	-0.209639	0.00887206	0.158983
TGFBI	-0.233461	0.00887414	0.158983
MIR548F3	-0.327155	0.00889631	0.159183
ANXA11	-0.234705	0.00889913	0.159183
LRRFIP1	-0.309161	0.00892818	0.159579
NFKB2	0.189742	0.00895175	0.159873
SRSF7	-0.278414	0.00896351	0.159873
TMEM161B-AS1	-0.195041	0.00897166	0.159873
ANKRD10	-0.249587	0.00897238	0.159873
ZNF672	0.174757	0.00899462	0.160146
CCDC141	-0.372157	0.00900578	0.160196
LOC100507577	-0.460504	0.00901135	0.160196
LOC100126582	-0.254397	0.00903338	0.160464
ERN1	-0.384003	0.00906311	0.160859
RP11-439A17.10	0.534481	0.00906958	0.160859
PPP1R15A	0.198696	0.00908027	0.160891
BLVRB	0.435967	0.00908567	0.160891
MOSPD3	0.20037	0.00909716	0.160891
RP11-395I14.2	-0.393918	0.00910118	0.160891
ZNF419	-0.180439	0.00910626	0.160891
SNORD8	-0.496323	0.00913224	0.160972
MCM4	0.227801	0.00913355	0.160972
RTN4RL1	0.347133	0.00913722	0.160972
ZFAS1	-0.233013	0.00913874	0.160972
TMEM256-PLSCR3	0.259555	0.00916437	0.161069
PLCG2	-0.230727	0.00916588	0.161069
MYSM1	-0.321876	0.00916985	0.161069
RP11-344B5.2	0.245901	0.00918401	0.161069
IGKV1D-13	0.32003	0.00918906	0.161069
C21orf91	0.296528	0.00919189	0.161069
ERP27	-0.508186	0.00919564	0.161069
PANX1	0.29438	0.00920014	0.161069
ARHGEF40	-0.281483	0.00922652	0.161398
SLC2A13	0.173541	0.00923296	0.161398
PSMA2	0.374891	0.00924399	0.161469
MRE11A	-0.264426	0.00925635	0.161562
C1GALT1	0.265087	0.00930733	0.16226
TEX38	-0.210858	0.00933481	0.16226
DAD1	0.205688	0.00933691	0.16226
NFKBIB	0.219692	0.0093417	0.16226
FLJ31104	0.216412	0.00934172	0.16226
RBM25	-0.289806	0.00934959	0.16226
ZNF780B	-0.318232	0.00935175	0.16226
KDM1B	0.236934	0.00935288	0.16226
LOC285505	-0.317904	0.00936618	0.16226
ELMO1-AS1	-0.35122	0.00936671	0.16226
FAAHP1	-0.161418	0.00939284	0.162591
SMG1P2	-0.367446	0.00942307	0.162991
AGO3	-0.228314	0.00943568	0.163087
C1QL2	0.218916	0.00945693	0.163332
TBC1D2B	0.225388	0.00946869	0.163339
HBZ	0.447837	0.00948356	0.163339
ATG3	0.373328	0.00948399	0.163339
FAM57A	0.244149	0.00948714	0.163339
NCOA7	0.344674	0.00949278	0.163339
UPF3AP1	-0.247663	0.00950991	0.163512
ZMYM2	-0.336147	0.00951795	0.163529
RNU6-188P	-0.514932	0.00953706	0.163735
ALMS1P	0.803289	0.00954777	0.163797
CAPG	0.182201	0.0095575	0.163842
P2RY1	0.176919	0.00957844	0.163975
PTPLAD1	0.348646	0.0095845	0.163975
LOC642533	-0.326896	0.00958915	0.163975
MITD1	0.291664	0.00959373	0.163975
EMC6	0.264869	0.00962248	0.164181
TSTA3	0.2446	0.00962302	0.164181
ARCN1	0.229325	0.00962713	0.164181
SPATA5	-0.268067	0.00964263	0.164322
NETO2	0.237853	0.00964967	0.164322
CMTM5	0.240886	0.00968895	0.164862
ARL3	-0.18133	0.00969564	0.164862
ATP5O	0.189998	0.00970407	0.164883
GUSBP1	-0.291794	0.00971269	0.164908
C6orf211	0.212504	0.00974119	0.165146
RN7SKP110	-0.313596	0.0097418	0.165146
RNU4-62P	-0.426736	0.0097482	0.165146
COQ5	0.225859	0.00977393	0.165244
RP11-51P8.1	-0.341675	0.00977435	0.165244
RBM45	-0.202562	0.00977611	0.165244
PDZD8	-0.288901	0.00978261	0.165244
RP11-1018N14.3	-0.371422	0.00979297	0.165285
RP4-798A10.2	-0.306178	0.0097994	0.165285
LOC101928736	0.196273	0.00981744	0.165468
DHRS12	0.478512	0.00983231	0.165524
CEBPA-AS1	0.27764	0.00983511	0.165524
RNU6-33P	-0.45505	0.00984542	0.165577
HIST1H4K	0.290504	0.00986216	0.165644
SLC7A6	-0.301229	0.0098638	0.165644
GALNT3	0.413997	0.00988349	0.165815
FGFR1OP	-0.26228	0.00990973	0.165815
AC090696.2	0.312865	0.009912	0.165815
CLK1	-0.343837	0.00991664	0.165815
HCFC1	0.219044	0.00992795	0.165815
ZFP92	0.192399	0.00993003	0.165815
ZNF33B	-0.28301	0.00993662	0.165815
RNU6-589P	-0.621907	0.00993825	0.165815
LOC101928994	0.257179	0.00993867	0.165815
NDUFS8	0.197174	0.00995408	0.165921
TNFRSF1A	0.25173	0.00995941	0.165921
RNU6-976P	0.281086	0.010007	0.166388
NPW	0.21964	0.0100082	0.166388
MPV17L2	0.183504	0.0100114	0.166388
LOC101929439	0.298488	0.0100185	0.166388
NPHP3	-0.280312	0.0100236	0.166388
CDK14	-0.165541	0.0100548	0.166613
DENND1B	0.329212	0.0100574	0.166613
LGALS9C	0.359193	0.0100588	0.166613
AHSP	0.565034	0.0100786	0.166822
RAC2	0.222746	0.0101187	0.166997
RNA5SP286	-0.309726	0.010124	0.166997
XPA	-0.247021	0.0101243	0.166997
RNU6-38P	-0.612561	0.0101249	0.166997
TTC3P1	-0.241819	0.0101284	0.166997
CSRNP1	0.185187	0.010138	0.166997
SZRD1	0.264897	0.0101489	0.166997
GINS2	0.281778	0.0101512	0.166997
MIR4476	0.24412	0.0101544	0.166997
PFDN2	0.202473	0.0101762	0.167161
CYTIP	-0.262798	0.0101983	0.167161
VPS25	0.208845	0.0101996	0.167161
NUP62	0.230275	0.0101999	0.167161
RNU6-669P	-0.359928	0.0102067	0.167161
RP11-298O21.6	0.498249	0.0102083	0.167161
PKI55	-0.315045	0.0102151	0.167161
METTL7B	0.315876	0.0102371	0.167402
RP11-465M18.1	-0.212614	0.0102651	0.167695
ATXN7	0.353122	0.0102695	0.167695
SIGLEC1	0.318634	0.0102912	0.167808
FAM223A	-0.332148	0.0102919	0.167808
CBR1	0.230522	0.0102983	0.167808
OFD1	-0.295184	0.0103178	0.167831
STK3	0.380804	0.0103304	0.167831
HCRT	0.240207	0.0103307	0.167831
RP5-857K21.1	-0.228424	0.0103457	0.167831
GAPDH	0.166395	0.0103571	0.167831
ZDHHC12	0.184458	0.0103708	0.167831
COX17	-0.338857	0.0103716	0.167831
PROX1	0.15811	0.0103768	0.167831
KIAA0825	-0.350004	0.0103779	0.167831
CBX6	0.178973	0.0103786	0.167831
FAM111A	0.285923	0.010393	0.167831
TRAJ14	-0.493038	0.0103935	0.167831
LINC00341	-0.230555	0.0104011	0.167831
LOC101927207	0.329755	0.0104016	0.167831
TRBV7-8	0.217502	0.0104216	0.168025
TUBA1C	0.182433	0.0104282	0.168025
RNU6-906P	-0.397257	0.0104383	0.16807
JAK1	-0.263818	0.0104476	0.168102
BPNT1	0.177369	0.0104717	0.168373
GSDMD	0.168648	0.0104883	0.168477
SLC2A6	0.209126	0.0104928	0.168477
SIRPB2	-0.251076	0.0105197	0.16856
RNU1-15P	-0.215507	0.0105229	0.16856
ADAM1A	-0.296697	0.010524	0.16856
FAM127A	0.259174	0.0105352	0.16856
SRP19	0.238958	0.010541	0.16856
LOC283887	-0.247587	0.0105419	0.16856
PRKCD	0.168616	0.0105604	0.168733
IFITM3	0.254913	0.0105673	0.168733
MIR181B1	-0.458521	0.0105882	0.168949
MPDU1	0.184662	0.0106112	0.169075
GANC	-0.261498	0.0106203	0.169075
CCNH	-0.321545	0.0106249	0.169075
ZNF319	0.208933	0.0106271	0.169075
CHKA	-0.236912	0.0106336	0.169075
KIR3DL2	0.365794	0.0106401	0.169075
LEPRE1	-0.150271	0.0106621	0.169308
MIR548Q	-0.309348	0.010694	0.169459
SUPT20H	-0.2299	0.0106963	0.169459
PRELID1	0.229248	0.010697	0.169459
ATG2B	-0.346766	0.0107011	0.169459
WASH5P	-0.236304	0.0107258	0.169459
MDM4	-0.257459	0.0107266	0.169459
TCN2	0.267064	0.0107296	0.169459
RP11-206L10.8	-0.443053	0.0107508	0.169459
RPL7	-0.241315	0.0107585	0.169459
DYNLT1	0.539282	0.0107602	0.169459
SMG1P1	-0.391137	0.0107614	0.169459
ULK4	-0.242581	0.0107748	0.169459
STIP1	0.421855	0.010779	0.169459
HERC2P2	-0.30428	0.010782	0.169459
MAFB	0.279259	0.010789	0.169459
RRN3	-0.279047	0.0107892	0.169459
ATP5SL	0.241555	0.0108299	0.169867
SCML1	0.248992	0.0108319	0.169867
C19orf35	0.269558	0.0108373	0.169867
TCF7L2	0.32613	0.0108557	0.169885
APRT	0.213999	0.0108676	0.169885
KRTAP6-2	0.236545	0.0108678	0.169885
GAS6-AS1	-0.180153	0.0108678	0.169885
SGIP1	0.234662	0.01088	0.16996
BRWD1	-0.358279	0.0108914	0.170023
ABHD5	-0.283588	0.0109009	0.170056
AC093495.4	-0.285988	0.0109269	0.170232
VPS13D	-0.28765	0.010937	0.170232
MRPL44	0.532798	0.0109409	0.170232
RNU6-1139P	-0.378942	0.0109436	0.170232
ERI1	0.270104	0.0109536	0.170232
LOC286367	-0.330458	0.0109565	0.170232
HM13	0.229285	0.0110242	0.170832
VDAC1	0.212806	0.0110242	0.170832
WDR83OS	0.242015	0.0110282	0.170832
VDR	0.183236	0.0110365	0.170832
NKX3-2	0.227329	0.0110376	0.170832
TTLL10-AS1	0.269649	0.0110454	0.170832
ZBTB37	-0.167621	0.011047	0.170832
FNBP4	-0.40103	0.0110546	0.170836
SGMS2	-0.186409	0.0110764	0.171007
HYOU1	0.173077	0.0110849	0.171007
HIST2H2AC	0.191785	0.011088	0.171007
STAG3L2	-0.304648	0.0111243	0.171452
CLU	0.267793	0.0111421	0.171528
UBA1	0.21529	0.0111441	0.171528
RNU6-1123P	-0.627956	0.011165	0.171735
RASSF3	-0.21651	0.011218	0.171966
PLBD1	0.192813	0.01122	0.171966
MIR421	-0.52703	0.011227	0.171966
REV1	-0.266143	0.011235	0.171966
RNU6-2	-0.437617	0.0112435	0.171966
RNU6-37P	-0.437617	0.0112435	0.171966
RNU6-11P	-0.437617	0.0112435	0.171966
LRRC37A2	-0.371186	0.0112465	0.171966
RNU6-419P	-0.623245	0.011249	0.171966
DOPEY2	-0.202034	0.0112545	0.171966
HSP90AA2	0.460305	0.0112686	0.172036
TBRG1	-0.216477	0.0112741	0.172036
LOC101930341	-0.199342	0.0112958	0.172254
LRRC37A	-0.342104	0.0113262	0.172603
PMM2	-0.275528	0.0113456	0.17262
GTF2B	0.291479	0.0113488	0.17262
LINC01089	-0.343906	0.011357	0.17262
PRKD2	0.244599	0.0113573	0.17262
OST4	0.225762	0.0113687	0.17268
RNU1-124P	-0.225885	0.0114084	0.173148
TRBV19	0.349116	0.0114176	0.173148
SRSF11	-0.373107	0.0114259	0.173148
TNFAIP2	0.19801	0.0114315	0.173148
SSH2	-0.278089	0.0114371	0.173148
TRAF5	-0.245088	0.011503	0.174032
RP9	-0.16179	0.0115148	0.174096
OSBPL3	-0.237749	0.0116074	0.175382
TPX2	0.272353	0.0116463	0.175753
DNMBP	-0.194141	0.0116472	0.175753
ZNF302	-0.210064	0.011661	0.175846
CLIC1	0.181533	0.011671	0.175881
COQ2	-0.299383	0.0116881	0.176025
ZNF746	-0.221404	0.0117082	0.176211
RNU6-949P	-0.398684	0.0117278	0.176391
SCARNA21	-0.291059	0.0117382	0.176391
LOC644450	-0.340397	0.011743	0.176391
CYCS	0.221103	0.0117746	0.17675
DPP3	0.263675	0.0117877	0.176831
ACSL4	0.358554	0.0117975	0.176862
LINC00898	0.222631	0.0118109	0.176872
RP11-353N4.1	-0.293176	0.0118209	0.176872
BCORP1	-0.287648	0.0118211	0.176872
RP11-148B18.3	0.235363	0.0118297	0.176885
KMO	0.389839	0.0118752	0.177353
PGK1	0.231229	0.0118763	0.177353
TPCN1	-0.223744	0.0119025	0.177499
NPIPB1P	-0.290123	0.0119098	0.177499
STRADB	0.335989	0.0119159	0.177499
AC022201.5	0.209615	0.0119169	0.177499
RNU6-211P	-0.428001	0.0119249	0.177503
JAKMIP2	-0.224764	0.0119398	0.177611
OXNAD1	-0.303792	0.0119551	0.177724
RNA5SP151	0.205932	0.0119926	0.178165
DDX17	-0.253311	0.0120285	0.178537
NDE1	-0.187985	0.0120331	0.178537
NUP85	-0.186041	0.0120527	0.178714
HBD	0.227294	0.0120862	0.179079
MIR1273A	-0.185464	0.0120929	0.179079
SEPW1	0.212335	0.012114	0.179276
RNU6-1	-0.438199	0.0121256	0.179333
CD84	-0.250054	0.012152	0.179608
CYB561	0.182961	0.012164	0.179646
SIPA1L1	0.352927	0.0121702	0.179646
SIAE	0.195218	0.0122147	0.179699
RP11-366M4.13	0.31254	0.0122394	0.179699
NPIPA1	-0.274423	0.0122496	0.179699
LOC101928290	0.201402	0.0122532	0.179699
FBXL7	0.207959	0.0122548	0.179699
RNA5SP497	0.343841	0.0122582	0.179699
MTERF4	-0.222758	0.0122604	0.179699
COX7B	0.241079	0.0122618	0.179699
PRKACG	-0.189847	0.012266	0.179699
SNORD14D	-0.558273	0.0122695	0.179699
SHMT2	0.153715	0.0122698	0.179699
PNISR	-0.359028	0.0122794	0.179699
RNU6-358P	-0.718145	0.0122806	0.179699
RP11-561I11.3	-0.218178	0.0122828	0.179699
ARHGEF19-AS1	0.207896	0.0123115	0.180004
MBOAT7	0.196851	0.0123284	0.18005
KIT	-0.254844	0.0123302	0.18005
OSCAR	0.158454	0.0123429	0.18012
OR2A9P	-0.195824	0.012362	0.180285
PTPRE	-0.206509	0.0124104	0.180854
RP5-1028L10.2	-0.210222	0.0124167	0.180854
HSPC081	-0.297913	0.0124309	0.180894
IFRD1	-0.244611	0.0124402	0.180894
FOLR2	0.170256	0.012444	0.180894
AC133528.2	-0.305426	0.0124508	0.180894
CRYZL1	-0.256422	0.0124757	0.181142
HSPA8	0.317054	0.0125231	0.181433
RP1-55C23.7	-0.262151	0.0125356	0.181433
KIF20A	0.193856	0.0125461	0.181433
UBE2Z	0.215605	0.0125475	0.181433
ACBD6	-0.250584	0.0125478	0.181433
SNORD60	-0.51973	0.0125519	0.181433
EVI5	-0.265651	0.012554	0.181433
SLC2A3	0.367011	0.0125588	0.181433
LOC101928495	-0.347284	0.0126394	0.182307
AJ239322.1	-0.221964	0.01264	0.182307
SERPINB1	0.188429	0.0126437	0.182307
ZNF542P	0.208647	0.0126508	0.182307
LILRB4	0.197362	0.0126706	0.182317
CHMP1B	-0.171649	0.0126726	0.182317
RP11-536P6.3	-0.220305	0.012683	0.182317
STAG3L1	-0.323527	0.012685	0.182317
MIR4480	-0.421128	0.0126911	0.182317
RP11-445N18.5	0.340068	0.0127052	0.182347
SNORD59B	-0.743891	0.012709	0.182347
MRPS18A	0.162117	0.0127235	0.182395
RNA5SP247	0.281104	0.0127282	0.182395
RNU7-43P	-0.334132	0.0127449	0.182522
ASAH1	-0.238308	0.012765	0.182609
LOC100507217	-0.324678	0.0127668	0.182609
SORL1	-0.254877	0.0127836	0.182735
CARF	-0.239977	0.0128187	0.182795
MMGT1	0.209789	0.0128215	0.182795
NEXN	0.331036	0.0128234	0.182795
NPIPB5	-0.228284	0.0128267	0.182795
RNU6-671P	-0.711393	0.0128275	0.182795
CD68	0.222116	0.0128416	0.182882
HSP90AA4P	0.487134	0.0128494	0.182882
FOXP1-IT1	-0.349484	0.0128757	0.183103
CASC7	-0.415983	0.0128808	0.183103
PKN2	-0.277521	0.0128969	0.183219
RNU6-638P	-0.527227	0.0129335	0.183625
CMC2	0.298325	0.0129687	0.183921
MTFMT	-0.194187	0.0129703	0.183921
TRIM14	0.252204	0.0129798	0.183943
VNN1	-0.321687	0.0129952	0.184049
MT1E	0.299497	0.0130111	0.18416
AC005522.7	-0.214265	0.0130586	0.18458
SSBP4	0.166196	0.0130642	0.18458
NDUFAF7	-0.19044	0.0130648	0.18458
MAFIP	-0.25662	0.0131208	0.185258
SERTAD1	0.254282	0.0131404	0.185421
LINC00984	-0.221218	0.0131684	0.185703
PFN1	0.246868	0.013193	0.185847
MRPL49	0.206055	0.0132028	0.185847
RANGAP1	0.173994	0.0132028	0.185847
HBQ1	0.206211	0.0132254	0.185959
IRF9	0.233769	0.0132305	0.185959
TREML2	0.240584	0.0132393	0.185959
AP5B1	0.206355	0.0132473	0.185959
SNORD15A	-0.395583	0.0132511	0.185959
OBFC1	0.382023	0.0132609	0.185983
RNU6-1019P	-0.436281	0.0132887	0.18619
MPZL1	-0.304405	0.0132918	0.18619
FNIP1	-0.232168	0.0133052	0.186264
SNORD70	-0.685493	0.0133743	0.186909
OR2A7	-0.191503	0.0133799	0.186909
RP11-36B15.1	-0.367827	0.0133833	0.186909
SIAH1	-0.170806	0.0133839	0.186909
KRR1	-0.295677	0.0133923	0.186909
TDP2	-0.180871	0.0133999	0.186909
RNU6-125P	-0.402935	0.013424	0.187088
CES1P1	0.24314	0.0134402	0.187088
LOC389765	-0.34909	0.0134541	0.187088
CDC16	-0.202358	0.0134558	0.187088
LOC101060449	-0.366914	0.0134588	0.187088
MIR3150B	0.24255	0.0134614	0.187088
CCT3	0.202482	0.0134842	0.187208
SF3B1	-0.288125	0.0134876	0.187208
RNU6-393P	-0.406718	0.0134944	0.187208
TMEM176B	0.196915	0.0135338	0.187367
RP11-49I4.3	-0.239497	0.0135345	0.187367
MT1A	0.510505	0.0135355	0.187367
GUSBP11	-0.242605	0.0135505	0.187367
RP11-101E5.1	-0.225181	0.013554	0.187367
ARHGAP17	0.346963	0.0135607	0.187367
ABAT	-0.173225	0.013568	0.187367
LYPLAL1	-0.228919	0.0135872	0.187367
TBX21	0.261698	0.0135887	0.187367
CGB5	0.231023	0.0136022	0.187367
FRMD6-AS1	0.179695	0.0136024	0.187367
TRAF3IP3	-0.264159	0.0136056	0.187367
RP5-1120P11.3	0.226979	0.0136115	0.187367
MYL4	0.334777	0.0136377	0.187413
RP5-1096J16.1	0.283177	0.0136459	0.187413
RP11-73O6.3	-0.300442	0.0136495	0.187413
DNAJC15	0.261755	0.0136558	0.187413
SP100	0.272881	0.0136574	0.187413
TOR1A	0.220418	0.0136635	0.187413
RP4-613B23.1	-0.182033	0.0136977	0.187677
CDK4	0.188944	0.0137062	0.187677
CECR1	0.281404	0.0137208	0.187677
RNA5SP65	-0.276643	0.0137217	0.187677
RNU6-15P	-0.408314	0.0137235	0.187677
PRKAB2	-0.170076	0.0137501	0.187702
CEP63	-0.252398	0.013751	0.187702
CD177	0.240753	0.0137618	0.187702
STAT3	0.392401	0.0137652	0.187702
TJP2	0.195301	0.0137779	0.187702
SLC25A40	-0.255056	0.0137801	0.187702
RNF138	0.22998	0.0137911	0.187702
CYFIP1	0.178172	0.0137976	0.187702
RNA5SP505	-0.283713	0.0138157	0.187702
SNORA22	-0.450757	0.0138168	0.187702
LRRC4B	0.228716	0.0138206	0.187702
ZNF684	0.252421	0.0138231	0.187702
CNTNAP3P2	-0.522766	0.0138524	0.187941
CASP10	0.360791	0.0138587	0.187941
SNORA71C	-0.381744	0.0138675	0.187941
TMEM126B	0.242147	0.0138733	0.187941
ROPN1L	0.239733	0.0139042	0.188114
NRROS	0.151233	0.013924	0.188114
ATP9B	-0.230867	0.0139398	0.188114
CACNA2D4	-0.210686	0.0139407	0.188114
HSPA5	0.30895	0.0139444	0.188114
TMEM173	0.217879	0.0139453	0.188114
EPM2AIP1	-0.345576	0.0139474	0.188114
NUP50-AS1	0.202392	0.0139616	0.188114
CREG1	0.442	0.0139792	0.188114
MT1CP	0.710741	0.0139796	0.188114
BTAF1	-0.323695	0.0139866	0.188114
LOC100335030	0.282307	0.014	0.188114
LINC01305	0.1696	0.0140017	0.188114
METTL3	-0.210398	0.0140028	0.188114
RASA1	-0.169111	0.0140084	0.188114
MS4A4E	-0.287595	0.0140232	0.188203
NR1H2	0.16288	0.0140605	0.18854
RNA5SP258	0.250463	0.0140646	0.18854
SCN5A	0.182989	0.0140799	0.188635
PEX11B	0.182037	0.0141272	0.189081
FRMD4B	0.21149	0.0141307	0.189081
SLC35E3	-0.213649	0.0141378	0.189081
PTS	-0.214592	0.0141472	0.189097
RP11-403I13.9	-0.278802	0.0142004	0.189698
SNORD116-18	-0.8008	0.0142183	0.189748
PIP5K1A	0.24646	0.0142206	0.189748
ARL8A	0.18767	0.0142494	0.189915
RNU6-574P	-0.537107	0.0142496	0.189915
SLC25A19	0.160842	0.0142589	0.189917
ARHGEF3	0.243452	0.0142662	0.189917
RNU6-946P	-0.449848	0.0142795	0.189919
KPTN	0.17203	0.0142831	0.189919
LOC100188947	0.261391	0.0142944	0.189919
MCTP1	0.279904	0.0142994	0.189919
LOC154761	0.335717	0.0143148	0.189974
TECR	0.209172	0.01432	0.189974
CLEC2B	0.41407	0.0143324	0.19003
LOC642236	-0.311511	0.0143507	0.190099
ACOT7	0.231366	0.0143541	0.190099
LINC00893	-0.243449	0.0143831	0.190374
NSUN5P1	-0.248466	0.0143985	0.190469
LINC00299	-0.274068	0.0144085	0.190491
RP1-101K10.6	-0.219929	0.0144181	0.190508
CLEC2D	-0.40284	0.0144347	0.190574
DUSP10	0.214397	0.0144395	0.190574
FAM174A	-0.204192	0.0144516	0.190624
MYL12A	0.219919	0.0144677	0.190713
CSF2RA	-0.206986	0.0144749	0.190713
SLC15A4	-0.245918	0.0144976	0.19082
CCT7	0.194986	0.0144995	0.19082
MICALL1	0.184213	0.0145316	0.191133
HLA-G	0.15607	0.0145426	0.191168
RMDN1	-0.201575	0.0145727	0.191455
ZNF814	-0.195811	0.0145855	0.191514
RAB29	0.231106	0.0146217	0.191811
FIGNL2	0.172743	0.0146248	0.191811
HLA-DMA	0.296289	0.0146384	0.19188
CHD6	-0.251099	0.0146474	0.19189
SRSF5	-0.369128	0.0146704	0.192082
STOM	0.382719	0.0147429	0.192902
BST1	0.280793	0.0147498	0.192902
TRIM25	0.258071	0.0147625	0.192959
CCDC88A	-0.321597	0.0148029	0.193377
C4orf32	0.272396	0.0148814	0.1942
MIR1285-1	-0.219903	0.0148976	0.1942
IL3RA	0.231859	0.0148991	0.1942
RP11-533O20.2	-0.360354	0.0149079	0.1942
SNORA31	-0.35156	0.014908	0.1942
AC007036.4	-0.225834	0.0149247	0.194308
MIR4454	-0.201122	0.0149534	0.194572
AK4	0.184118	0.0150041	0.19488
FLJ31306	-0.244836	0.0150101	0.19488
EBI3	0.203566	0.0150198	0.19488
JUNB	0.257514	0.0150225	0.19488
COPG1	0.163013	0.0150271	0.19488
LOC613037	-0.250696	0.0150291	0.19488
MIR7-3	0.257625	0.0150363	0.19488
LOC283922	-0.255814	0.0150731	0.195141
ENO1	0.146281	0.0150734	0.195141
FZD2	0.180905	0.0150866	0.195203
RN7SKP283	-0.443843	0.0151565	0.195972
PEF1	0.151745	0.0151643	0.195972
ADO	0.158298	0.0151716	0.195972
SNORD9	-0.333299	0.015185	0.196036
GOLGA8R	-0.212809	0.0152012	0.196135
LINC01422	-0.324619	0.015225	0.196333
FAM120B	-0.172609	0.0152583	0.196652
HSP90AB1	0.385706	0.0152782	0.196799
IDS	-0.300729	0.015296	0.196918
MIR548T	-0.405791	0.0153181	0.197093
SAMD3	-0.267212	0.0153301	0.197137
MFSD8	-0.206597	0.0153456	0.197227
GPR146	0.250792	0.0153698	0.197373
RNA5SP97	-0.322483	0.0153742	0.197373
PRPF4B	-0.241673	0.0153899	0.197423
NDUFA10	-0.175397	0.0154009	0.197423
LOC101929979	-0.748538	0.0154117	0.197423
C17orf62	0.225186	0.0154123	0.197423
VCPIP1	0.463168	0.0154386	0.19751
RP1-5O6.4	-0.331085	0.0154487	0.19751
SLC16A13	0.184832	0.0154766	0.19751
SMARCD3	0.186868	0.0154829	0.19751
LOC100287497	-0.496906	0.0154847	0.19751
DESI1	0.212341	0.0154856	0.19751
CA1	0.43897	0.0155042	0.19751
RNA5SP113	0.2702	0.0155095	0.19751
CAPN7	-0.316036	0.0155163	0.19751
RNU1-100P	0.307736	0.0155221	0.19751
ERV3-1	-0.207052	0.0155426	0.19751
TYMS	0.188921	0.0155485	0.19751
UCKL1-AS1	0.211393	0.0155525	0.19751
IL2RG	0.252669	0.0155526	0.19751
LOC100130872	-0.176711	0.0155541	0.19751
TM6SF1	-0.251082	0.0155562	0.19751
BTBD6	-0.165401	0.0155695	0.197571
BFAR	0.159329	0.0155859	0.197608
ATM	-0.434212	0.0155945	0.197608
RNU6-1225P	-0.740558	0.0155981	0.197608
ILDR2	0.178865	0.0156409	0.198024
MIR548H2	-0.411076	0.0156482	0.198024
CENPC	-0.355347	0.015689	0.198187
STT3A	0.191991	0.0156909	0.198187
ARRDC5	-0.306885	0.0156959	0.198187
ARMCX6	0.179901	0.0157014	0.198187
IGLV5-48	0.306279	0.015704	0.198187
RNU6-729P	-0.42555	0.0157674	0.198878
TNKS	-0.202606	0.0158155	0.199248
SCARNA9L	-0.449365	0.0158194	0.199248
RNU6-957P	-0.43375	0.0158227	0.199248
ITPRIP	0.203499	0.0158613	0.199626
CHCHD2	0.231053	0.0158853	0.199819
AP001610.5	0.34459	0.0159195	0.200139
GLA	0.161439	0.015929	0.20015
CEP192	-0.276034	0.0159594	0.200402
RP11-91H12.2	-0.383753	0.0159665	0.200402
RP11-109P14.10	-0.215887	0.0159858	0.200535
RAD51-AS1	-0.210621	0.0160126	0.200762
COMMD9	0.181242	0.0160711	0.201345
RNU4-78P	-0.399606	0.0160773	0.201345
SEPT7P2	-0.213556	0.0160852	0.201345
RP3-510L9.1	-0.322675	0.0160941	0.201347
NECAP2	0.176383	0.0161281	0.201544
MIR7-2	0.264474	0.0161305	0.201544
MTRNR2L2	-0.37805	0.0161361	0.201544
ASNA1	0.213452	0.016177	0.201945
MUC3A	0.221302	0.0162069	0.202207
RNU6-27P	-0.492116	0.0162448	0.202207
RELL1	-0.378643	0.0162586	0.202207
NPIPB3	-0.377895	0.0162656	0.202207
GPRASP1	-0.169591	0.0162659	0.202207
CPQ	-0.201193	0.0162677	0.202207
HERC2P3	-0.255188	0.0162719	0.202207
PDE7A	-0.335493	0.0162771	0.202207
PTEN	-0.34536	0.0162962	0.202207
APOBEC3A	-0.242241	0.0163164	0.202207
ZNRD1-AS1	-0.149519	0.016327	0.202207
BTLA	-0.182916	0.0163327	0.202207
SMG1P7	-0.377123	0.0163531	0.202207
EXOC3L2	0.200742	0.016354	0.202207
LINC01136	0.187271	0.0163573	0.202207
MX2	0.214366	0.0163626	0.202207
TMEM128	-0.174934	0.0163677	0.202207
RNU6-838P	-0.503317	0.0163683	0.202207
RCC2	0.188552	0.0163735	0.202207
SPDYE4	-0.252381	0.0163792	0.202207
CHD9	-0.315351	0.0163822	0.202207
CGB1	0.172791	0.0164148	0.202428
DUSP16	-0.357079	0.0164176	0.202428
GS1-124K5.3	-0.264256	0.0164396	0.202591
MS4A14	-0.532379	0.0164577	0.20264
ZRANB2	-0.283093	0.0164611	0.20264
HERC2P9	-0.258248	0.0164841	0.202815
KLRB1	-0.298072	0.0165064	0.202909
AC006042.6	0.26984	0.0165172	0.202909
NKX6-1	0.167204	0.0165182	0.202909
SNORA70B	-0.31285	0.0165567	0.203274
ESAM	0.194602	0.0165789	0.203305
CBR4	-0.218983	0.01658	0.203305
KTI12	0.259814	0.0165857	0.203305
RP13-216E22.4	-0.260089	0.0165975	0.203342
CD300C	0.152283	0.0166069	0.203344
ZBED5	-0.215005	0.0166249	0.203344
NASP	0.185859	0.016626	0.203344
SOX2	0.177476	0.0166346	0.203344
RNU6-60P	-0.550971	0.0166418	0.203344
XPNPEP1	0.176234	0.0166525	0.203367
ACO2	0.197754	0.016674	0.203521
CELF2-AS1	-0.487736	0.0166935	0.203647
RBM23	0.321247	0.0167102	0.203647
CTC-505O3.3	-0.413796	0.0167108	0.203647
RP11-103H7.2	0.264017	0.0167333	0.203649
DYNLL1	0.172172	0.0167413	0.203649
GOLGA6L10	-0.198138	0.0167508	0.203649
ARRDC4	-0.380152	0.0167537	0.203649
LINC00926	-0.270236	0.0167647	0.203649
CCL2	0.494991	0.0167665	0.203649
FIBIN	0.260795	0.0167728	0.203649
DDA1	0.203757	0.0167827	0.203662
FMR1-IT1	-0.242479	0.0168087	0.203871
FKBP1C	0.247842	0.0168251	0.203885
DPH3	0.235049	0.0168275	0.203885
CMTM8	0.196905	0.0168467	0.20401
RP11-288L9.4	0.228845	0.0168577	0.204035
PUS3	0.364519	0.0168701	0.204079
PNPO	0.221803	0.0168833	0.204131
OPN1SW	0.177274	0.0168995	0.204221
CMC1	-0.278785	0.0169095	0.204234
RNU4-52P	-0.231277	0.0169376	0.204342
CCNJL	-0.215635	0.0169418	0.204342
RNU6-1147P	-0.420628	0.0169524	0.204342
RNU4-1	-0.706233	0.0169558	0.204342
SPN	0.231472	0.0169678	0.204342
HSP90AB3P	0.375874	0.0169716	0.204342
LAPTM4B	0.153479	0.0169917	0.204426
EFHC2	-0.212274	0.0169982	0.204426
GOLGA8O	-0.19699	0.0170052	0.204426
GTF2IRD2P1	-0.243649	0.0170617	0.204889
ARL17A	-0.244155	0.0170691	0.204889
ACTG1	0.184902	0.0170713	0.204889
KB-1254G8.1	-0.219956	0.0170867	0.204889
CHD2	-0.296569	0.0170954	0.204889
PPM1G	0.154837	0.017097	0.204889
TMEM11	0.226322	0.0171094	0.20493
MPRIP	-0.237359	0.0171266	0.204968
LOC100507639	-0.375848	0.0171393	0.204968
PLAC8	0.255507	0.0171461	0.204968
CDK5	0.186208	0.0171481	0.204968
PPP3CA	-0.172409	0.0171809	0.205254
ZNF527	-0.167396	0.0171998	0.205323
RNU6-1331P	-0.376186	0.0172045	0.205323
MIR600HG	-0.285647	0.0172376	0.205594
C12orf4	0.451494	0.0172551	0.205594
RNU6-536P	-0.427446	0.0172568	0.205594
GJD2	0.177937	0.0172657	0.205594
NDUFA9	0.243632	0.0172718	0.205594
TAMM41	-0.201378	0.0173226	0.206092
RP11-439A17.7	0.187339	0.0173398	0.206106
GHRLOS	-0.226214	0.0173577	0.206106
RNA5SP365	-0.199376	0.0173615	0.206106
RNA5-8SP3	-0.257222	0.0173675	0.206106
SIRT4	0.207046	0.0173697	0.206106
SNORD116-19	-0.48507	0.017385	0.206106
CYB5A	0.220574	0.0173951	0.206106
EFHD2	0.19653	0.0173997	0.206106
OR2T35	0.220103	0.0174042	0.206106
SDHAP2	-0.217281	0.0174396	0.206315
MYEF2	-0.166197	0.0174462	0.206315
ZNF546	-0.213055	0.0174487	0.206315
TMEM14E	-0.480984	0.0174732	0.206449
MIR1303	-0.195591	0.0174779	0.206449
ANKRD44-IT1	-0.403557	0.017501	0.206615
ERMN	-0.332159	0.0175367	0.206895
CD209	0.281525	0.0175426	0.206895
ACOT9	0.19685	0.017586	0.207301
RNU6-968P	-0.345952	0.0175985	0.207326
LRRC37B	-0.262373	0.0176061	0.207326
YIPF5	0.187353	0.0176342	0.207551
LOC101927550	-0.175672	0.0176474	0.2076
LEAP2	-0.226182	0.0176766	0.207838
LOC100505534	0.20993	0.0177306	0.207929
CAPN1	0.176117	0.0177313	0.207929
GOLGA8S	-0.178884	0.0177356	0.207929
DNHD1	-0.190268	0.0177405	0.207929
DNAJA1	0.454457	0.0177498	0.207929
ESCO2	0.191388	0.0177582	0.207929
ZNF217	-0.213848	0.0177608	0.207929
HIST1H3I	0.318504	0.0177629	0.207929
RNU6-790P	-0.417111	0.0177656	0.207929
RP11-206L10.9	-0.235933	0.0178136	0.208385
RNY5P1	0.331	0.0178251	0.208414
MAGT1	0.267091	0.0178371	0.208449
SEC31A	0.196062	0.0178859	0.208914
STEAP4	0.629844	0.0179126	0.20912
RNU6-310P	-0.557916	0.0179534	0.209395
CCDC14	-0.225105	0.0179544	0.209395
QSOX2	-0.185425	0.0179756	0.209537
PROX2	0.154594	0.0179929	0.209633
RNU6-326P	-0.479347	0.0180206	0.209849
LAG3	0.192847	0.0180323	0.209879
NMI	0.368703	0.0180884	0.210349
MGC72080	-0.207359	0.0180909	0.210349
PCDHGC5	-0.232006	0.0181119	0.210482
CEP89	-0.170793	0.0181316	0.210482
ZBTB18	-0.204709	0.0181431	0.210482
SLC25A13	-0.184504	0.0181473	0.210482
CD59	0.195269	0.0181536	0.210482
TRIM66	-0.174194	0.0181571	0.210482
SCIMP	0.315999	0.0181774	0.210611
RP11-259O2.3	-0.240963	0.0181966	0.210728
KB-1507C5.3	-0.305312	0.0182173	0.210805
HERPUD2	0.173271	0.0182215	0.210805
RP11-213G21.1	-0.477143	0.018232	0.21082
C1orf162	0.246548	0.0182451	0.210866
RP5-930J4.4	-0.26236	0.0182549	0.210874
RPS26	0.188094	0.0182775	0.210941
VCAN	-0.24042	0.0182791	0.210941
EFHC1	-0.260681	0.0182884	0.210944
[truncated: 21,058 more rows]
