# Supplementary material for: Comparative transcriptomic analysis reveals translationally relevant processes in mouse models of malaria
Source: eLife. 2022 Jan 10;11:e70763. doi: 10.7554/eLife.70763 (PMC8747512; doi:10.7554/eLife.70763)
Supplement: Supplementary file 11. [file elife-70763-supp11.xlsx]

## Sheet: Key
Table Column Name Key
Supplementary File 11 GO terms
Description: Results of the gene ontology (GO) analysis for the first two principal components (PC) of each of the analyses completed. The background gene list used are all the genes used to generate the corresponding principal component analysis plot, the gene list of interest are the genes that contributed greater than or equal to 0.1 to the principal component of interest.
Term_id	Gene Ontology (GO) term ID
Term	GO term description
Ont	Type of ontology: BP (Biological Process), Cellular Component (CC), Molecular Function (MF)
N	Number of genes with the GO term in the database
DE	Number of genes in the list of interest with the GO term
P.DE	p-value of the GO term
Tab Name Key
RNASeq	RNASeq human dataset from: Lee, H.J. et al., 2018
Idaghdour et al., 2012	The human microarray data from: Idaghdour et al., 2012
Boldt	The human U133A microarray data from: Boldt, A.B., Van Tong, H., Grobusch, M.P., Kalmbach, Y., Ella, A.D., Kombila, M., Meyer, C.G., Kun, J.F., Kremsner, P.G. & Velavan, T.P. (2019). The blood transcriptome of childhood malaria. EBioMedicine, 40, 614-625.
PC1	Principal Component 1
PC2	Principal Component 2
CM	Cerebral Malaria
SA	Severe Anaemia
UM	Uncomplicated Malaria
Healthy	Healthy
HL	Hyperlactatemia
CH	Cerebral Malaria + Hyperlactatemia
CM-UM	Human CM-UM comparison was compared to the mouse late-early
HL-UM	Human HL-UM comparison was compared to the mouse late-early
CH-UM	Human CH-UM comparison was compared to the mouse late-early
UM-H	Human UM-H comparison was compared to the mouse early-healthy
CM-UM	Human CM-UM comparison was compared to the mouse late-early
SA-UM	Human SA-UM comparison was compared to the mouse late-early
CHMI	The human malaria challenge study dataset differential expression analysis day of first symptoms-day before infection that was compared to mouse early-healthy.

## Sheet: RNASeq_PC1_CM-UM
Term_id	Term	Ont	N	DE	P.DE
GO:0002376	immune system process	BP	3193	12	1.34731e-08
GO:0035580	specific granule lumen	CC	62	4	7.43775e-08
GO:0043312	neutrophil degranulation	BP	485	6	4.36101e-07
GO:0002283	neutrophil activation involved in immune response	BP	488	6	4.52163e-07
GO:0030141	secretory granule	CC	833	7	4.78626e-07
GO:0042119	neutrophil activation	BP	498	6	5.09263e-07
GO:0002446	neutrophil mediated immunity	BP	499	6	5.15286e-07
GO:0036230	granulocyte activation	BP	504	6	5.46284e-07
GO:0043299	leukocyte degranulation	BP	534	6	7.6625e-07
GO:0006887	exocytosis	BP	903	7	8.25552e-07
GO:0002275	myeloid cell activation involved in immune response	BP	544	6	8.54004e-07
GO:0002444	myeloid leukocyte mediated immunity	BP	551	6	9.20219e-07
GO:0001775	cell activation	BP	1440	8	1.196e-06
GO:0099503	secretory vesicle	CC	986	7	1.4919e-06
GO:0034774	secretory granule lumen	CC	321	5	1.63156e-06
GO:0060205	cytoplasmic vesicle lumen	CC	338	5	2.10192e-06
GO:0031983	vesicle lumen	CC	339	5	2.13259e-06
GO:0002274	myeloid leukocyte activation	BP	651	6	2.42907e-06
GO:0042581	specific granule	CC	160	4	3.37382e-06
GO:0031410	cytoplasmic vesicle	CC	2314	9	3.46624e-06
GO:0097708	intracellular vesicle	CC	2317	9	3.5044e-06
GO:0002366	leukocyte activation involved in immune response	BP	707	6	3.91674e-06
GO:0002263	cell activation involved in immune response	BP	711	6	4.04652e-06
GO:0008131	primary amine oxidase activity	MF	6	2	6.49391e-06
GO:1904724	tertiary granule lumen	CC	55	3	6.52528e-06
GO:0045055	regulated exocytosis	BP	794	6	7.64455e-06
GO:0045321	leukocyte activation	BP	1284	7	8.67465e-06
GO:0012505	endomembrane system	CC	4441	11	9.23088e-06
GO:0002443	leukocyte mediated immunity	BP	874	6	1.32516e-05
GO:0009986	cell surface	CC	897	6	1.53707e-05
GO:0051851	modification by host of symbiont morphology or physiology	BP	77	3	1.80335e-05
GO:0016192	vesicle-mediated transport	BP	2107	8	2.09695e-05
GO:0051702	interaction with symbiont	BP	82	3	2.17886e-05
GO:0044433	cytoplasmic vesicle part	CC	1504	7	2.45412e-05
GO:0032940	secretion by cell	BP	1524	7	2.67534e-05
GO:0031982	vesicle	CC	3884	10	2.80054e-05
GO:0006955	immune response	BP	2279	8	3.74394e-05
GO:0046903	secretion	BP	1661	7	4.68407e-05
GO:0016641	oxidoreductase activity, acting on the CH-NH2 group of donors, oxygen as acceptor	MF	16	2	5.17488e-05
GO:0051817	modification of morphology or physiology of other organism involved in symbiotic interaction	BP	112	3	5.54012e-05
GO:0032496	response to lipopolysaccharide	BP	330	4	5.82334e-05
GO:0070887	cellular response to chemical stimulus	BP	3281	9	6.34074e-05
GO:0002237	response to molecule of bacterial origin	BP	343	4	6.7666e-05
GO:0009617	response to bacterium	BP	699	5	7.05916e-05
GO:0019730	antimicrobial humoral response	BP	122	3	7.1476e-05
GO:0016638	oxidoreductase activity, acting on the CH-NH2 group of donors	MF	20	2	8.18077e-05
GO:0009308	amine metabolic process	BP	138	3	0.000103079
GO:0002252	immune effector process	BP	1265	6	0.000106901
GO:0043062	extracellular structure organization	BP	422	4	0.000150782
GO:0035821	modification of morphology or physiology of other organism	BP	164	3	0.000171799
GO:0070820	tertiary granule	CC	164	3	0.000171799
GO:0044788	modulation by host of viral process	BP	29	2	0.000174197
GO:0033993	response to lipid	BP	923	5	0.000261431
GO:0050900	leukocyte migration	BP	499	4	0.000286586
GO:0050896	response to stimulus	BP	9324	13	0.000289207
GO:0007166	cell surface receptor signaling pathway	BP	3052	8	0.000310106
GO:0071222	cellular response to lipopolysaccharide	BP	205	3	0.000331258
GO:0050832	defense response to fungus	BP	40	2	0.00033323
GO:0009636	response to toxic substance	BP	525	4	0.000347764
GO:0071219	cellular response to molecule of bacterial origin	BP	212	3	0.000365507
GO:0051707	response to other organism	BP	1013	5	0.000402778
GO:0043207	response to external biotic stimulus	BP	1015	5	0.000406471
GO:0019731	antibacterial humoral response	BP	46	2	0.000441136
GO:1901700	response to oxygen-containing compound	BP	1637	6	0.000441489
GO:0051181	cofactor transport	BP	47	2	0.000460562
GO:0009607	response to biotic stimulus	BP	1047	5	0.000469147
GO:0071216	cellular response to biotic stimulus	BP	236	3	0.000500086
GO:0035094	response to nicotine	BP	49	2	0.000500646
GO:0098552	side of membrane	CC	587	4	0.000530969
GO:0010033	response to organic substance	BP	3302	8	0.000540707
GO:0009620	response to fungus	BP	52	2	0.000563843
GO:0051179	localization	BP	6735	11	0.000601249
GO:1901701	cellular response to oxygen-containing compound	BP	1136	5	0.000682578
GO:0070946	neutrophil mediated killing of gram-positive bacterium	BP	1	1	0.000683327
GO:0033214	iron assimilation by chelation and transport	BP	1	1	0.000683327
GO:1900159	positive regulation of bone mineralization involved in bone maturation	BP	1	1	0.000683327
GO:2000308	negative regulation of tumor necrosis factor (ligand) superfamily member 11 production	BP	1	1	0.000683327
GO:0060945	cardiac neuron differentiation	BP	1	1	0.000683327
GO:0140205	oligopeptide import across plasma membrane	BP	1	1	0.000683327
GO:0140206	dipeptide import across plasma membrane	BP	1	1	0.000683327
GO:1901494	regulation of cysteine metabolic process	BP	1	1	0.000683327
GO:0034679	integrin alpha9-beta1 complex	CC	1	1	0.000683327
GO:0008843	endochitinase activity	MF	1	1	0.000683327
GO:0005294	neutral L-amino acid secondary active transmembrane transporter activity	MF	1	1	0.000683327
GO:0015327	cystine:glutamate antiporter activity	MF	1	1	0.000683327
GO:0015328	cystine secondary active transmembrane transporter activity	MF	1	1	0.000683327
GO:1901680	sulfur-containing amino acid secondary active transmembrane transporter activity	MF	1	1	0.000683327
GO:0006952	defense response	BP	1797	6	0.000730341
GO:0006879	cellular iron ion homeostasis	BP	61	2	0.000775425
GO:0031640	killing of cells of other organism	BP	62	2	0.00080096
GO:0044364	disruption of cells of other organism	BP	62	2	0.00080096
GO:0006026	aminoglycan catabolic process	BP	65	2	0.000879983
GO:0005764	lysosome	CC	678	4	0.000912776
GO:0000323	lytic vacuole	CC	679	4	0.000917821
GO:0071310	cellular response to organic substance	BP	2707	7	0.00102198
GO:0046677	response to antibiotic	BP	327	3	0.00128685
GO:0055072	iron ion homeostasis	BP	79	2	0.00129637
GO:0042221	response to chemical	BP	4797	9	0.00130125
GO:0042742	defense response to bacterium	BP	330	3	0.0013211
GO:0140039	cell-cell adhesion in response to extracellular stimulus	BP	2	1	0.00136622
GO:0033212	iron assimilation	BP	2	1	0.00136622
GO:0042710	biofilm formation	BP	2	1	0.00136622
GO:0044010	single-species biofilm formation	BP	2	1	0.00136622
GO:0044407	single-species biofilm formation in or on host organism	BP	2	1	0.00136622
GO:1900190	regulation of single-species biofilm formation	BP	2	1	0.00136622
GO:1900191	negative regulation of single-species biofilm formation	BP	2	1	0.00136622
GO:1900228	regulation of single-species biofilm formation in or on host organism	BP	2	1	0.00136622
GO:1900229	negative regulation of single-species biofilm formation in or on host organism	BP	2	1	0.00136622
GO:0034775	glutathione transmembrane transport	BP	2	1	0.00136622
GO:0035443	tripeptide transmembrane transport	BP	2	1	0.00136622
GO:1903786	regulation of glutathione biosynthetic process	BP	2	1	0.00136622
GO:0048627	myoblast development	BP	2	1	0.00136622
GO:0071065	alpha9-beta1 integrin-vascular cell adhesion molecule-1 complex	CC	2	1	0.00136622
GO:1903981	enterobactin binding	MF	2	1	0.00136622
GO:0005773	vacuole	CC	774	4	0.0014939
GO:0050829	defense response to Gram-negative bacterium	BP	88	2	0.00160504
GO:0006959	humoral immune response	BP	356	3	0.00164236
GO:0019221	cytokine-mediated signaling pathway	BP	798	4	0.00167234
GO:0030198	extracellular matrix organization	BP	368	3	0.00180581
GO:0022610	biological adhesion	BP	1427	5	0.00191431
GO:0070062	extracellular exosome	CC	2163	6	0.00195005
GO:0072535	tumor necrosis factor (ligand) superfamily member 11 production	BP	3	1	0.00204868
GO:2000307	regulation of tumor necrosis factor (ligand) superfamily member 11 production	BP	3	1	0.00204868
GO:0031335	regulation of sulfur amino acid metabolic process	BP	3	1	0.00204868
GO:0019065	receptor-mediated endocytosis of virus by host cell	BP	3	1	0.00204868
GO:0075509	endocytosis involved in viral entry into host cell	BP	3	1	0.00204868
GO:0090461	glutamate homeostasis	BP	3	1	0.00204868
GO:0015688	iron chelate transport	BP	3	1	0.00204868
GO:0015891	siderophore transport	BP	3	1	0.00204868
GO:0034635	glutathione transport	BP	3	1	0.00204868
GO:0042939	tripeptide transport	BP	3	1	0.00204868
GO:2000211	regulation of glutamate metabolic process	BP	3	1	0.00204868
GO:0032997	Fc receptor complex	CC	3	1	0.00204868
GO:0032998	Fc-epsilon receptor I complex	CC	3	1	0.00204868
GO:1903561	extracellular vesicle	CC	2186	6	0.00206074
GO:0043230	extracellular organelle	CC	2191	6	0.00208543
GO:0009897	external side of plasma membrane	CC	393	3	0.00217842
GO:0018958	phenol-containing compound metabolic process	BP	103	2	0.00218967
GO:0042803	protein homodimerization activity	MF	859	4	0.00219263
GO:0006810	transport	BP	5190	9	0.00237189
GO:0046916	cellular transition metal ion homeostasis	BP	108	2	0.00240382
GO:0006950	response to stress	BP	4110	8	0.00243763
GO:0070836	caveola assembly	BP	4	1	0.00273071
GO:0006030	chitin metabolic process	BP	4	1	0.00273071
GO:0006032	chitin catabolic process	BP	4	1	0.00273071
GO:1902732	positive regulation of chondrocyte proliferation	BP	4	1	0.00273071
GO:0080144	amino acid homeostasis	BP	4	1	0.00273071
GO:1903553	positive regulation of extracellular exosome assembly	BP	4	1	0.00273071
GO:0106104	regulation of glutamate receptor clustering	BP	4	1	0.00273071
GO:1904717	regulation of AMPA glutamate receptor clustering	BP	4	1	0.00273071
GO:0097013	phagocytic vesicle lumen	CC	4	1	0.00273071
GO:0004568	chitinase activity	MF	4	1	0.00273071
GO:0004175	endopeptidase activity	MF	427	3	0.00275764
GO:0051234	establishment of localization	BP	5315	9	0.00283755
GO:0006979	response to oxidative stress	BP	451	3	0.00321904
GO:0044106	cellular amine metabolic process	BP	129	2	0.00340673
GO:0035442	dipeptide transmembrane transport	BP	5	1	0.0034123
GO:0042938	dipeptide transport	BP	5	1	0.0034123
GO:0044789	modulation by host of viral release from host cell	BP	5	1	0.0034123
GO:0044791	positive regulation by host of viral release from host cell	BP	5	1	0.0034123
GO:0060161	positive regulation of dopamine receptor signaling pathway	BP	5	1	0.0034123
GO:0019732	antifungal humoral response	BP	5	1	0.0034123
GO:2001205	negative regulation of osteoclast development	BP	5	1	0.0034123
GO:0022614	membrane to membrane docking	BP	5	1	0.0034123
GO:0044218	other organism cell membrane	CC	5	1	0.0034123
GO:0044279	other organism membrane	CC	5	1	0.0034123
GO:0019863	IgE binding	MF	5	1	0.0034123
GO:0005887	integral component of plasma membrane	CC	1634	5	0.00348362
GO:0055076	transition metal ion homeostasis	BP	131	2	0.00351086
GO:0002682	regulation of immune system process	BP	1659	5	0.00372272
GO:0042383	sarcolemma	CC	136	2	0.00377768
GO:0044444	cytoplasmic part	CC	9735	12	0.00380246
GO:0042737	drug catabolic process	BP	140	2	0.00399777
GO:0044245	polysaccharide digestion	BP	6	1	0.00409346
GO:1900157	regulation of bone mineralization involved in bone maturation	BP	6	1	0.00409346
GO:1903551	regulation of extracellular exosome assembly	BP	6	1	0.00409346
GO:0042493	response to drug	BP	1021	4	0.00410666
GO:0031226	intrinsic component of plasma membrane	CC	1713	5	0.00428009
GO:0009605	response to external stimulus	BP	2520	6	0.00428613
GO:0042542	response to hydrogen peroxide	BP	146	2	0.0043389
GO:0005886	plasma membrane	CC	5637	9	0.00439833
GO:0042802	identical protein binding	MF	1728	5	0.0044452
GO:1903900	regulation of viral life cycle	BP	149	2	0.00451439
GO:0005506	iron ion binding	MF	152	2	0.00469314
GO:0010046	response to mycotoxin	BP	7	1	0.00477419
GO:0033029	regulation of neutrophil apoptotic process	BP	7	1	0.00477419
GO:0000820	regulation of glutamine family amino acid metabolic process	BP	7	1	0.00477419
GO:0070944	neutrophil mediated killing of bacterium	BP	7	1	0.00477419
GO:0044854	plasma membrane raft assembly	BP	7	1	0.00477419
GO:0071971	extracellular exosome assembly	BP	7	1	0.00477419
GO:1901072	glucosamine-containing compound catabolic process	BP	7	1	0.00477419
GO:0097577	sequestering of iron ion	BP	7	1	0.00477419
GO:0000099	sulfur amino acid transmembrane transporter activity	MF	7	1	0.00477419
GO:0005766	primary lysosome	CC	155	2	0.00487515
GO:0042582	azurophil granule	CC	155	2	0.00487515
GO:0071944	cell periphery	CC	5756	9	0.00513036
GO:0004252	serine-type endopeptidase activity	MF	160	2	0.00518568
GO:0005615	extracellular space	CC	3563	7	0.00524213
GO:0051704	multi-organism process	BP	2635	6	0.0053717
GO:0001781	neutrophil apoptotic process	BP	8	1	0.00545449
GO:0097113	AMPA glutamate receptor clustering	BP	8	1	0.00545449
GO:0097688	glutamate receptor clustering	BP	8	1	0.00545449
GO:0070943	neutrophil mediated killing of symbiont cell	BP	8	1	0.00545449
GO:1903012	positive regulation of bone development	BP	8	1	0.00545449
GO:0042420	dopamine catabolic process	BP	8	1	0.00545449
GO:0008061	chitin binding	MF	8	1	0.00545449
GO:0050776	regulation of immune response	BP	1115	4	0.00562802
GO:0071345	cellular response to cytokine stimulus	BP	1118	4	0.00568208
GO:0001906	cell killing	BP	168	2	0.00570112
GO:0008201	heparin binding	MF	169	2	0.00576715
GO:0006022	aminoglycan metabolic process	BP	170	2	0.00583353
GO:0010035	response to inorganic substance	BP	562	3	0.00596284
GO:0005775	vacuolar lumen	CC	172	2	0.00596736
GO:0042060	wound healing	BP	564	3	0.00602196
GO:0055002	striated muscle cell development	BP	173	2	0.0060348
GO:0044437	vacuolar part	CC	567	3	0.0061113
GO:0044857	plasma membrane raft organization	BP	9	1	0.00613435
GO:0019614	catechol-containing compound catabolic process	BP	9	1	0.00613435
GO:0042424	catecholamine catabolic process	BP	9	1	0.00613435
GO:0034145	positive regulation of toll-like receptor 4 signaling pathway	BP	9	1	0.00613435
GO:0051259	protein complex oligomerization	BP	568	3	0.00614126
GO:0098542	defense response to other organism	BP	568	3	0.00614126
GO:0022406	membrane docking	BP	178	2	0.00637728
GO:0008236	serine-type peptidase activity	MF	182	2	0.00665756
GO:0033690	positive regulation of osteoblast proliferation	BP	10	1	0.00681379
GO:0070942	neutrophil mediated cytotoxicity	BP	10	1	0.00681379
GO:0048021	regulation of melanin biosynthetic process	BP	10	1	0.00681379
GO:0035672	oligopeptide transmembrane transport	BP	10	1	0.00681379
GO:0055001	muscle cell development	BP	186	2	0.00694341
GO:0017171	serine hydrolase activity	MF	186	2	0.00694341
GO:0070011	peptidase activity, acting on L-amino acid peptides	MF	599	3	0.00711467
GO:0044421	extracellular region part	CC	3763	7	0.00717094
GO:1901136	carbohydrate derivative catabolic process	BP	192	2	0.00738257
GO:0071396	cellular response to lipid	BP	610	3	0.00748112
GO:1901678	iron coordination entity transport	BP	11	1	0.00749279
GO:0060159	regulation of dopamine receptor signaling pathway	BP	11	1	0.00749279
GO:0044793	negative regulation by host of viral process	BP	11	1	0.00749279
GO:2001204	regulation of osteoclast development	BP	11	1	0.00749279
GO:0006857	oligopeptide transport	BP	11	1	0.00749279
GO:0046348	amino sugar catabolic process	BP	11	1	0.00749279
GO:0051673	membrane disruption in other organism	BP	11	1	0.00749279
GO:1903011	negative regulation of bone development	BP	11	1	0.00749279
GO:0034097	response to cytokine	BP	1211	4	0.0075386
GO:0040011	locomotion	BP	1977	5	0.0079179
GO:0008233	peptidase activity	MF	623	3	0.0079286
GO:0072578	neurotransmitter-gated ion channel clustering	BP	12	1	0.00817136
GO:0051873	killing by host of symbiont cells	BP	12	1	0.00817136
GO:1900376	regulation of secondary metabolite biosynthetic process	BP	12	1	0.00817136
GO:0035630	bone mineralization involved in bone maturation	BP	12	1	0.00817136
GO:1903909	regulation of receptor clustering	BP	12	1	0.00817136
GO:0002002	regulation of angiotensin levels in blood	BP	12	1	0.00817136
GO:0002003	angiotensin maturation	BP	12	1	0.00817136
GO:0019336	phenol-containing compound catabolic process	BP	12	1	0.00817136
GO:0097449	astrocyte projection	CC	12	1	0.00817136
GO:0050792	regulation of viral process	BP	208	2	0.00861389
GO:0009635	response to herbicide	BP	13	1	0.0088495
GO:0001765	membrane raft assembly	BP	13	1	0.0088495
GO:0098712	L-glutamate import across plasma membrane	BP	13	1	0.0088495
GO:0031665	negative regulation of lipopolysaccharide-mediated signaling pathway	BP	13	1	0.0088495
GO:0051775	response to redox state	BP	14	1	0.00952721
GO:1901626	regulation of postsynaptic membrane organization	BP	14	1	0.00952721
GO:0051852	disruption by host of symbiont cells	BP	14	1	0.00952721
GO:0043455	regulation of secondary metabolic process	BP	14	1	0.00952721
GO:0051938	L-glutamate import	BP	14	1	0.00952721
GO:0060009	Sertoli cell development	BP	14	1	0.00952721
GO:0005313	L-glutamate transmembrane transporter activity	MF	14	1	0.00952721
GO:0015172	acidic amino acid transmembrane transporter activity	MF	14	1	0.00952721
GO:1901565	organonitrogen compound catabolic process	BP	1296	4	0.00955951
GO:0043903	regulation of symbiosis, encompassing mutualism through parasitism	BP	222	2	0.00976209
GO:0051716	cellular response to stimulus	BP	7617	10	0.00981088
GO:0044459	plasma membrane part	CC	2985	6	0.00997879
GO:0009611	response to wounding	BP	678	3	0.00999778
GO:0098797	plasma membrane protein complex	CC	681	3	0.010119
GO:0051883	killing of cells in other organism involved in symbiotic interaction	BP	15	1	0.0102045
GO:0042762	regulation of sulfur metabolic process	BP	15	1	0.0102045
GO:1902188	positive regulation of viral release from host cell	BP	15	1	0.0102045
GO:0044406	adhesion of symbiont to host	BP	15	1	0.0102045
GO:1903543	positive regulation of exosomal secretion	BP	15	1	0.0102045
GO:0072349	modified amino acid transmembrane transporter activity	MF	15	1	0.0102045
GO:0005539	glycosaminoglycan binding	MF	229	2	0.0103606
GO:0046983	protein dimerization activity	MF	1331	4	0.0104873
GO:0000302	response to reactive oxygen species	BP	232	2	0.010622
GO:0016540	protein autoprocessing	BP	16	1	0.0108813
GO:0001780	neutrophil homeostasis	BP	16	1	0.0108813
GO:0044794	positive regulation by host of viral process	BP	16	1	0.0108813
GO:0051238	sequestering of metal ion	BP	16	1	0.0108813
GO:1903541	regulation of exosomal secretion	BP	16	1	0.0108813
GO:0051818	disruption of cells of other organism involved in symbiotic interaction	BP	17	1	0.0115578
GO:0035988	chondrocyte proliferation	BP	17	1	0.0115578
GO:0032780	negative regulation of ATPase activity	BP	17	1	0.0115578
GO:0006750	glutathione biosynthetic process	BP	17	1	0.0115578
GO:0021756	striatum development	BP	18	1	0.0122337
GO:0036035	osteoclast development	BP	18	1	0.0122337
GO:1901681	sulfur compound binding	MF	250	2	0.0122519
GO:0002544	chronic inflammatory response	BP	19	1	0.0129093
GO:0001991	regulation of systemic arterial blood pressure by circulatory renin-angiotensin	BP	19	1	0.0129093
GO:0006534	cysteine metabolic process	BP	19	1	0.0129093
GO:0019184	nonribosomal peptide biosynthetic process	BP	19	1	0.0129093
GO:1990182	exosomal secretion	BP	19	1	0.0129093
GO:0007155	cell adhesion	BP	1420	4	0.0131114
GO:0016021	integral component of membrane	CC	5330	8	0.0132127
GO:0060008	Sertoli cell differentiation	BP	20	1	0.0135844
GO:0043931	ossification involved in bone maturation	BP	20	1	0.0135844
GO:1903204	negative regulation of oxidative stress-induced neuron death	BP	20	1	0.0135844
GO:0097734	extracellular exosome biogenesis	BP	20	1	0.0135844
GO:0034143	regulation of toll-like receptor 4 signaling pathway	BP	20	1	0.0135844
GO:0071682	endocytic vesicle lumen	CC	20	1	0.0135844
GO:0031668	cellular response to extracellular stimulus	BP	268	2	0.0139851
GO:0023052	signaling	BP	6620	9	0.0140099
GO:0042135	neurotransmitter catabolic process	BP	21	1	0.0142591
GO:0042438	melanin biosynthetic process	BP	21	1	0.0142591
GO:0007154	cell communication	BP	6647	9	0.0144149
GO:0006925	inflammatory cell apoptotic process	BP	22	1	0.0149334
GO:0006582	melanin metabolic process	BP	22	1	0.0149334
GO:0035584	calcium-mediated signaling using intracellular calcium source	BP	22	1	0.0149334
GO:0140112	extracellular vesicle biogenesis	BP	22	1	0.0149334
GO:0089718	amino acid import across plasma membrane	BP	23	1	0.0156073
GO:0070977	bone maturation	BP	23	1	0.0156073
GO:0015813	L-glutamate transmembrane transport	BP	23	1	0.0156073
GO:0034123	positive regulation of toll-like receptor signaling pathway	BP	23	1	0.0156073
GO:0072337	modified amino acid transport	BP	23	1	0.0156073
GO:0002080	acrosomal membrane	CC	23	1	0.0156073
GO:0048583	regulation of response to stimulus	BP	4342	7	0.015938
GO:0031224	intrinsic component of membrane	CC	5495	8	0.0159686
GO:0050801	ion homeostasis	BP	811	3	0.0162236
GO:0021544	subpallium development	BP	24	1	0.0162807
GO:0031579	membrane raft organization	BP	24	1	0.0162807
GO:0002227	innate immune response in mucosa	BP	24	1	0.0162807
GO:1903010	regulation of bone development	BP	24	1	0.0162807
GO:1901071	glucosamine-containing compound metabolic process	BP	24	1	0.0162807
GO:0097386	glial cell projection	CC	24	1	0.0162807
GO:0019865	immunoglobulin binding	MF	24	1	0.0162807
GO:0071356	cellular response to tumor necrosis factor	BP	291	2	0.0163465
GO:0051146	striated muscle cell differentiation	BP	293	2	0.0165594
GO:0050901	leukocyte tethering or rolling	BP	25	1	0.0169537
GO:0031664	regulation of lipopolysaccharide-mediated signaling pathway	BP	25	1	0.0169537
GO:0004190	aspartic-type endopeptidase activity	MF	25	1	0.0169537
GO:0030667	secretory granule membrane	CC	298	2	0.0170971
GO:0034599	cellular response to oxidative stress	BP	302	2	0.0175327
GO:1903203	regulation of oxidative stress-induced neuron death	BP	26	1	0.0176262
GO:0003081	regulation of systemic arterial blood pressure by renin-angiotensin	BP	26	1	0.0176262
GO:0043090	amino acid import	BP	26	1	0.0176262
GO:0021591	ventricular system development	BP	26	1	0.0176262
GO:0070001	aspartic-type peptidase activity	MF	26	1	0.0176262
GO:0060326	cell chemotaxis	BP	304	2	0.0177522
GO:0006954	inflammatory response	BP	848	3	0.0182732
GO:0060384	innervation	BP	27	1	0.0182984
GO:0036475	neuron death in response to oxidative stress	BP	27	1	0.0182984
GO:0000272	polysaccharide catabolic process	BP	27	1	0.0182984
GO:0048799	animal organ maturation	BP	27	1	0.0182984
GO:0045671	negative regulation of osteoclast differentiation	BP	27	1	0.0182984
GO:0034612	response to tumor necrosis factor	BP	312	2	0.0186423
GO:0033688	regulation of osteoblast proliferation	BP	28	1	0.0189701
GO:0016477	cell migration	BP	1592	4	0.0193321
GO:0033032	regulation of myeloid cell apoptotic process	BP	29	1	0.0196414
GO:0044550	secondary metabolite biosynthetic process	BP	29	1	0.0196414
GO:0043236	laminin binding	MF	29	1	0.0196414
GO:0043539	protein serine/threonine kinase activator activity	MF	29	1	0.0196414
GO:0016050	vesicle organization	BP	325	2	0.0201288
GO:0003824	catalytic activity	MF	5710	8	0.0202073
GO:0002102	podosome	CC	30	1	0.0203122
GO:0044403	symbiont process	BP	884	3	0.020403
GO:0016485	protein processing	BP	328	2	0.0204788
GO:0019058	viral life cycle	BP	328	2	0.0204788
GO:0033687	osteoblast proliferation	BP	31	1	0.0209826
GO:0070306	lens fiber cell differentiation	BP	31	1	0.0209826
GO:1902186	regulation of viral release from host cell	BP	31	1	0.0209826
GO:0008305	integrin complex	CC	31	1	0.0209826
GO:0015301	anion:anion antiporter activity	MF	31	1	0.0209826
GO:0015175	neutral amino acid transmembrane transporter activity	MF	31	1	0.0209826
GO:0051128	regulation of cellular component organization	BP	2507	5	0.0211141
GO:0005576	extracellular region	CC	4586	7	0.0214186
GO:1901564	organonitrogen compound metabolic process	BP	7040	9	0.0214435
GO:0070207	protein homotrimerization	BP	32	1	0.0216526
GO:0045745	positive regulation of G protein-coupled receptor signaling pathway	BP	32	1	0.0216526
GO:0048741	skeletal muscle fiber development	BP	32	1	0.0216526
GO:0071496	cellular response to external stimulus	BP	339	2	0.0217842
GO:0016787	hydrolase activity	MF	2533	5	0.0220055
GO:0033028	myeloid cell apoptotic process	BP	33	1	0.0223222
GO:0016486	peptide hormone processing	BP	33	1	0.0223222
GO:0006536	glutamate metabolic process	BP	34	1	0.0229914
GO:0009925	basal plasma membrane	CC	34	1	0.0229914
GO:0098636	protein complex involved in cell adhesion	CC	34	1	0.0229914
GO:0005737	cytoplasm	CC	11625	12	0.0231135
GO:0051260	protein homooligomerization	BP	351	2	0.0232475
GO:0044419	interspecies interaction between organisms	BP	932	3	0.0234524
GO:0001505	regulation of neurotransmitter levels	BP	354	2	0.0236196
GO:0031589	cell-substrate adhesion	BP	354	2	0.0236196
GO:0014904	myotube cell development	BP	35	1	0.0236601
GO:0098751	bone cell development	BP	35	1	0.0236601
GO:0019076	viral release from host cell	BP	35	1	0.0236601
GO:0035890	exit from host	BP	35	1	0.0236601
GO:0035891	exit from host cell	BP	35	1	0.0236601
GO:0052126	movement in host environment	BP	35	1	0.0236601
GO:0052192	movement in environment of other organism involved in symbiotic interaction	BP	35	1	0.0236601
GO:0034142	toll-like receptor 4 signaling pathway	BP	35	1	0.0236601
GO:1901682	sulfur compound transmembrane transporter activity	MF	35	1	0.0236601
GO:0001530	lipopolysaccharide binding	MF	35	1	0.0236601
GO:0042127	regulation of cell proliferation	BP	1700	4	0.0240656
GO:0071709	membrane assembly	BP	36	1	0.0243284
GO:0002385	mucosal immune response	BP	36	1	0.0243284
GO:0022804	active transmembrane transporter activity	MF	362	2	0.024624
GO:0008284	positive regulation of cell proliferation	BP	951	3	0.0247261
GO:0010038	response to metal ion	BP	364	2	0.0248779
GO:1900026	positive regulation of substrate adhesion-dependent cell spreading	BP	37	1	0.0249963
GO:0006040	amino sugar metabolic process	BP	38	1	0.0256637
GO:0042417	dopamine metabolic process	BP	39	1	0.0263308
GO:0030501	positive regulation of bone mineralization	BP	39	1	0.0263308
GO:0002251	organ or tissue specific immune response	BP	39	1	0.0263308
GO:0005310	dicarboxylic acid transmembrane transporter activity	MF	39	1	0.0263308
GO:0048870	cell motility	BP	1751	4	0.0265338
GO:0051674	localization of cell	BP	1751	4	0.0265338
GO:0001990	regulation of systemic arterial blood pressure by hormone	BP	40	1	0.0269974
GO:0001941	postsynaptic membrane organization	BP	40	1	0.0269974
GO:0042692	muscle cell differentiation	BP	385	2	0.0276092
GO:1901653	cellular response to peptide	BP	385	2	0.0276092
GO:0048286	lung alveolus development	BP	41	1	0.0276635
GO:0044091	membrane biogenesis	BP	41	1	0.0276635
GO:0010243	response to organonitrogen compound	BP	998	3	0.0280395
GO:0045087	innate immune response	BP	1008	3	0.0287744
GO:1904646	cellular response to amyloid-beta	BP	43	1	0.0289946
GO:0000096	sulfur amino acid metabolic process	BP	43	1	0.0289946
GO:0072348	sulfur compound transport	BP	43	1	0.0289946
GO:0051604	protein maturation	BP	397	2	0.0292229
GO:0007212	dopamine receptor signaling pathway	BP	44	1	0.0296595
GO:0061756	leukocyte adhesion to vascular endothelial cell	BP	44	1	0.0296595
GO:0046189	phenol-containing compound biosynthetic process	BP	44	1	0.0296595
GO:0045785	positive regulation of cell adhesion	BP	403	2	0.0300439
GO:0043900	regulation of multi-organism process	BP	405	2	0.0303197
GO:0048483	autonomic nervous system development	BP	45	1	0.030324
GO:0007157	heterophilic cell-cell adhesion via plasma membrane cell adhesion molecules	BP	46	1	0.0309881
GO:0001504	neurotransmitter uptake	BP	46	1	0.0309881
GO:0070169	positive regulation of biomineral tissue development	BP	47	1	0.0316517
GO:0002832	negative regulation of response to biotic stimulus	BP	47	1	0.0316517
GO:0007165	signal transduction	BP	6155	8	0.0316818
GO:0009069	serine family amino acid metabolic process	BP	48	1	0.0323149
GO:0002762	negative regulation of myeloid leukocyte differentiation	BP	48	1	0.0323149
GO:0044764	multi-organism cellular process	BP	48	1	0.0323149
GO:0008542	visual learning	BP	48	1	0.0323149
GO:0003044	regulation of systemic arterial blood pressure mediated by a chemical signal	BP	49	1	0.0329777
GO:0042398	cellular modified amino acid biosynthetic process	BP	50	1	0.0336401
GO:0045178	basal part of cell	CC	51	1	0.0343021
GO:0005326	neurotransmitter transporter activity	MF	51	1	0.0343021
GO:0048518	positive regulation of biological process	BP	6254	8	0.0347933
GO:1900024	regulation of substrate adhesion-dependent cell spreading	BP	52	1	0.0349636
GO:1901698	response to nitrogen compound	BP	1089	3	0.035115
GO:0010043	response to zinc ion	BP	53	1	0.0356247
GO:1902475	L-alpha-amino acid transmembrane transport	BP	53	1	0.0356247
GO:0007632	visual behavior	BP	53	1	0.0356247
GO:0031526	brush border membrane	CC	53	1	0.0356247
GO:0006584	catecholamine metabolic process	BP	54	1	0.0362854
GO:0009712	catechol-containing compound metabolic process	BP	54	1	0.0362854
GO:0070206	protein trimerization	BP	54	1	0.0362854
GO:1904645	response to amyloid-beta	BP	54	1	0.0362854
GO:0015179	L-amino acid transmembrane transporter activity	MF	54	1	0.0362854
GO:0009314	response to radiation	BP	448	2	0.0364942
GO:0006576	cellular biogenic amine metabolic process	BP	55	1	0.0369457
GO:0043113	receptor clustering	BP	55	1	0.0369457
GO:0046148	pigment biosynthetic process	BP	56	1	0.0376055
GO:1903202	negative regulation of oxidative stress-induced cell death	BP	56	1	0.0376055
GO:0006749	glutathione metabolic process	BP	56	1	0.0376055
GO:1900408	negative regulation of cellular response to oxidative stress	BP	57	1	0.038265
GO:0007029	endoplasmic reticulum organization	BP	57	1	0.038265
GO:0050840	extracellular matrix binding	MF	57	1	0.038265
GO:0055081	anion homeostasis	BP	58	1	0.038924
GO:0031663	lipopolysaccharide-mediated signaling pathway	BP	58	1	0.038924
GO:0035577	azurophil granule membrane	CC	58	1	0.038924
GO:0004869	cysteine-type endopeptidase inhibitor activity	MF	58	1	0.038924
GO:0099516	ion antiporter activity	MF	58	1	0.038924
GO:0044877	protein-containing complex binding	MF	1134	3	0.0389351
GO:0070527	platelet aggregation	BP	59	1	0.0395826
GO:1902883	negative regulation of response to oxidative stress	BP	59	1	0.0395826
GO:0045071	negative regulation of viral genome replication	BP	59	1	0.0395826
GO:0097110	scaffold protein binding	MF	59	1	0.0395826
GO:0046794	transport of virus	BP	60	1	0.0402408
GO:0045123	cellular extravasation	BP	61	1	0.0408985
GO:1903902	positive regulation of viral life cycle	BP	61	1	0.0408985
GO:0006027	glycosaminoglycan catabolic process	BP	61	1	0.0408985
GO:0034113	heterotypic cell-cell adhesion	BP	61	1	0.0408985
GO:0006521	regulation of cellular amino acid metabolic process	BP	62	1	0.0415558
GO:0048871	multicellular organismal homeostasis	BP	485	2	0.0421688
GO:0008283	cell proliferation	BP	2024	4	0.0424051
GO:0045669	positive regulation of osteoblast differentiation	BP	64	1	0.0428693
GO:0045670	regulation of osteoclast differentiation	BP	64	1	0.0428693
GO:0048278	vesicle docking	BP	64	1	0.0428693
GO:0002684	positive regulation of immune system process	BP	1185	3	0.04352
GO:0048878	chemical homeostasis	BP	1187	3	0.0437053
GO:0016043	cellular component organization	BP	6512	8	0.0439701
GO:0015800	acidic amino acid transport	BP	66	1	0.044181
GO:0010494	cytoplasmic stress granule	CC	66	1	0.044181
GO:0031667	response to nutrient levels	BP	499	2	0.0443994
GO:0050839	cell adhesion molecule binding	MF	499	2	0.0443994
GO:0098590	plasma membrane region	CC	1198	3	0.0447319
GO:0019748	secondary metabolic process	BP	67	1	0.0448363
GO:0048747	muscle fiber development	BP	67	1	0.0448363
GO:0015807	L-amino acid transport	BP	67	1	0.0448363
GO:0005518	collagen binding	MF	67	1	0.0448363
GO:0009888	tissue development	BP	2065	4	0.0451866
GO:0035924	cellular response to vascular endothelial growth factor stimulus	BP	68	1	0.0454911
GO:0061515	myeloid cell development	BP	70	1	0.0467995
GO:0034121	regulation of toll-like receptor signaling pathway	BP	70	1	0.0467995
GO:0002521	leukocyte differentiation	BP	515	2	0.0470027
GO:0042440	pigment metabolic process	BP	71	1	0.0474531
GO:1901652	response to peptide	BP	520	2	0.047828
GO:1903556	negative regulation of tumor necrosis factor superfamily cytokine production	BP	72	1	0.0481062
GO:0038034	signal transduction in absence of ligand	BP	72	1	0.0481062
GO:0097192	extrinsic apoptotic signaling pathway in absence of ligand	BP	72	1	0.0481062
GO:0061844	antimicrobial humoral immune response mediated by antimicrobial peptide	BP	73	1	0.048759
GO:0044766	multi-organism transport	BP	73	1	0.048759
GO:1902579	multi-organism localization	BP	73	1	0.048759
GO:0001895	retina homeostasis	BP	74	1	0.0494113
GO:1901616	organic hydroxy compound catabolic process	BP	74	1	0.0494113
GO:0009064	glutamine family amino acid metabolic process	BP	74	1	0.0494113
GO:0015171	amino acid transmembrane transporter activity	MF	74	1	0.0494113
GO:0009991	response to extracellular stimulus	BP	531	2	0.0496627
GO:1903201	regulation of oxidative stress-induced cell death	BP	75	1	0.0500632
GO:1902117	positive regulation of organelle assembly	BP	75	1	0.0500632
GO:1901615	organic hydroxy compound metabolic process	BP	535	2	0.0503363
GO:0051130	positive regulation of cellular component organization	BP	1258	3	0.0505508
GO:0030500	regulation of bone mineralization	BP	76	1	0.0507147
GO:0001937	negative regulation of endothelial cell proliferation	BP	76	1	0.0507147
GO:0030154	cell differentiation	BP	4239	6	0.0508203
GO:0044215	other organism	CC	77	1	0.0513658
GO:0044216	other organism cell	CC	77	1	0.0513658
GO:0044217	other organism part	CC	77	1	0.0513658
GO:0071840	cellular component organization or biogenesis	BP	6697	8	0.0515659
GO:0008306	associative learning	BP	78	1	0.0520165
GO:0098796	membrane protein complex	CC	1278	3	0.0525722
GO:0021675	nerve development	BP	79	1	0.0526668
GO:0016020	membrane	CC	9495	10	0.0527036
GO:1901575	organic substance catabolic process	BP	2175	4	0.0531732
GO:0022617	extracellular matrix disassembly	BP	80	1	0.0533166
GO:0043462	regulation of ATPase activity	BP	80	1	0.0533166
GO:0002088	lens development in camera-type eye	BP	80	1	0.0533166
GO:0005901	caveola	CC	80	1	0.0533166
GO:0030295	protein kinase activator activity	MF	80	1	0.0533166
GO:0048468	cell development	BP	2183	4	0.0537839
GO:0033238	regulation of cellular amine metabolic process	BP	81	1	0.053966
GO:0034109	homotypic cell-cell adhesion	BP	81	1	0.053966
GO:0030512	negative regulation of transforming growth factor beta receptor signaling pathway	BP	81	1	0.053966
GO:0048522	positive regulation of cellular process	BP	5490	7	0.0542014
GO:0006855	drug transmembrane transport	BP	82	1	0.0546151
GO:2000106	regulation of leukocyte apoptotic process	BP	83	1	0.0552637
GO:1903845	negative regulation of cellular response to transforming growth factor beta stimulus	BP	83	1	0.0552637
GO:0005902	microvillus	CC	83	1	0.0552637
GO:0045445	myoblast differentiation	BP	84	1	0.0559118
GO:0050886	endocrine process	BP	84	1	0.0559118
GO:0006928	movement of cell or subcellular component	BP	2213	4	0.0561103
GO:1903901	negative regulation of viral life cycle	BP	85	1	0.0565596
GO:0005791	rough endoplasmic reticulum	CC	85	1	0.0565596
GO:0015297	antiporter activity	MF	85	1	0.0565596
GO:0097367	carbohydrate derivative binding	MF	2219	4	0.0565825
GO:0001776	leukocyte homeostasis	BP	86	1	0.057207
GO:0003333	amino acid transmembrane transport	BP	86	1	0.057207
GO:0019209	kinase activator activity	MF	86	1	0.057207
GO:0006875	cellular metal ion homeostasis	BP	579	2	0.0579684
GO:0045921	positive regulation of exocytosis	BP	88	1	0.0585005
GO:1900407	regulation of cellular response to oxidative stress	BP	88	1	0.0585005
GO:0071417	cellular response to organonitrogen compound	BP	585	2	0.0590397
GO:0045778	positive regulation of ossification	BP	90	1	0.0597923
GO:0045638	negative regulation of myeloid cell differentiation	BP	91	1	0.0604376
GO:0060333	interferon-gamma-mediated signaling pathway	BP	91	1	0.0604376
GO:0035578	azurophil granule lumen	CC	91	1	0.0604376
GO:0031234	extrinsic component of cytoplasmic side of plasma membrane	CC	91	1	0.0604376
GO:2000117	negative regulation of cysteine-type endopeptidase activity	BP	92	1	0.0610825
GO:0015238	drug transmembrane transporter activity	MF	92	1	0.0610825
GO:0048869	cellular developmental process	BP	4431	6	0.0615082
GO:0003073	regulation of systemic arterial blood pressure	BP	93	1	0.061727
GO:0036473	cell death in response to oxidative stress	BP	93	1	0.061727
GO:0070167	regulation of biomineral tissue development	BP	94	1	0.0623711
GO:0006906	vesicle fusion	BP	94	1	0.0623711
GO:0004553	hydrolase activity, hydrolyzing O-glycosyl compounds	MF	94	1	0.0623711
GO:0044425	membrane part	CC	6939	8	0.0628807
GO:0045069	regulation of viral genome replication	BP	95	1	0.0630147
GO:0042102	positive regulation of T cell proliferation	BP	95	1	0.0630147
GO:0043202	lysosomal lumen	CC	95	1	0.0630147
GO:0006835	dicarboxylic acid transport	BP	96	1	0.063658
GO:0051591	response to cAMP	BP	97	1	0.0643008
GO:0120162	positive regulation of cold-induced thermogenesis	BP	97	1	0.0643008
GO:1902882	regulation of response to oxidative stress	BP	97	1	0.0643008
GO:0001657	ureteric bud development	BP	97	1	0.0643008
GO:0030316	osteoclast differentiation	BP	97	1	0.0643008
GO:0099175	regulation of postsynapse organization	BP	98	1	0.0649433
GO:0019886	antigen processing and presentation of exogenous peptide antigen via MHC class II	BP	98	1	0.0649433
GO:0072163	mesonephric epithelium development	BP	98	1	0.0649433
GO:0072164	mesonephric tubule development	BP	98	1	0.0649433
GO:0009057	macromolecule catabolic process	BP	1396	3	0.0653163
GO:0070301	cellular response to hydrogen peroxide	BP	99	1	0.0655853
GO:0043648	dicarboxylic acid metabolic process	BP	99	1	0.0655853
GO:0048525	negative regulation of viral process	BP	99	1	0.0655853
GO:0005903	brush border	CC	99	1	0.0655853
GO:0034446	substrate adhesion-dependent cell spreading	BP	100	1	0.0662269
GO:0090174	organelle membrane fusion	BP	100	1	0.0662269
GO:0044446	intracellular organelle part	CC	9811	10	0.0665242
GO:0050830	defense response to Gram-positive bacterium	BP	101	1	0.0668681
GO:0002495	antigen processing and presentation of peptide antigen via MHC class II	BP	101	1	0.0668681
GO:0002504	antigen processing and presentation of peptide or polysaccharide antigen via MHC class II	BP	102	1	0.0675089
GO:0001823	mesonephros development	BP	102	1	0.0675089
GO:0005796	Golgi lumen	CC	102	1	0.0675089
GO:0007229	integrin-mediated signaling pathway	BP	103	1	0.0681493
GO:1902106	negative regulation of leukocyte differentiation	BP	103	1	0.0681493
GO:0043227	membrane-bounded organelle	CC	13019	12	0.0681623
GO:0001523	retinoid metabolic process	BP	104	1	0.0687892
GO:0071887	leukocyte apoptotic process	BP	104	1	0.0687892
GO:0030593	neutrophil chemotaxis	BP	104	1	0.0687892
GO:0030175	filopodium	CC	104	1	0.0687892
GO:0007009	plasma membrane organization	BP	105	1	0.0694288
GO:0006935	chemotaxis	BP	644	2	0.0699452
GO:0042330	taxis	BP	646	2	0.0703262
GO:0048524	positive regulation of viral process	BP	107	1	0.0707067
GO:0001909	leukocyte mediated cytotoxicity	BP	107	1	0.0707067
GO:1901699	cellular response to nitrogen compound	BP	648	2	0.070708
GO:0001669	acrosomal vesicle	CC	108	1	0.0713451
GO:0030003	cellular cation homeostasis	BP	652	2	0.0714736
GO:0055065	metal ion homeostasis	BP	653	2	0.0716655
GO:0044853	plasma membrane raft	CC	109	1	0.071983
GO:0016101	diterpenoid metabolic process	BP	110	1	0.0726205
GO:0006024	glycosaminoglycan biosynthetic process	BP	110	1	0.0726205
GO:0098739	import across plasma membrane	BP	110	1	0.0726205
GO:0014902	myotube differentiation	BP	112	1	0.0738944
GO:0001938	positive regulation of endothelial cell proliferation	BP	112	1	0.0738944
GO:0006873	cellular ion homeostasis	BP	665	2	0.0739817
GO:0060349	bone morphogenesis	BP	114	1	0.0751666
GO:0030282	bone mineralization	BP	114	1	0.0751666
GO:0005976	polysaccharide metabolic process	BP	114	1	0.0751666
GO:0061061	muscle structure development	BP	672	2	0.0753444
GO:0006023	aminoglycan biosynthetic process	BP	115	1	0.0758021
GO:0042626	ATPase activity, coupled to transmembrane movement of substances	MF	115	1	0.0758021
GO:0043492	ATPase activity, coupled to movement of substances	MF	115	1	0.0758021
GO:0002764	immune response-regulating signaling pathway	BP	675	2	0.0759311
GO:0002761	regulation of myeloid leukocyte differentiation	BP	117	1	0.0770719
GO:0016798	hydrolase activity, acting on glycosyl bonds	MF	117	1	0.0770719
GO:1990266	neutrophil migration	BP	118	1	0.0777062
GO:0051193	regulation of cofactor metabolic process	BP	119	1	0.07834
GO:0006721	terpenoid metabolic process	BP	120	1	0.0789735
GO:0017015	regulation of transforming growth factor beta receptor signaling pathway	BP	120	1	0.0789735
GO:0030155	regulation of cell adhesion	BP	691	2	0.0790856
GO:0010811	positive regulation of cell-substrate adhesion	BP	121	1	0.0796066
GO:0046718	viral entry into host cell	BP	121	1	0.0796066
GO:0019079	viral genome replication	BP	122	1	0.0802392
GO:1903844	regulation of cellular response to transforming growth factor beta stimulus	BP	122	1	0.0802392
GO:0071621	granulocyte chemotaxis	BP	123	1	0.0808715
GO:0015405	P-P-bond-hydrolysis-driven transmembrane transporter activity	MF	123	1	0.0808715
GO:0048584	positive regulation of response to stimulus	BP	2500	4	0.0812494
GO:0048284	organelle fusion	BP	124	1	0.0815034
GO:0048513	animal organ development	BP	3583	5	0.0818728
GO:0071363	cellular response to growth factor stimulus	BP	706	2	0.0820819
GO:0044422	organelle part	CC	10112	10	0.0820889
GO:0045471	response to ethanol	BP	125	1	0.0821348
GO:0015399	primary active transmembrane transporter activity	MF	125	1	0.0821348
GO:0043229	intracellular organelle	CC	13294	12	0.0825371
GO:0090101	negative regulation of transmembrane receptor protein serine/threonine kinase signaling pathway	BP	126	1	0.0827659
GO:0045667	regulation of osteoblast differentiation	BP	126	1	0.0827659
GO:0048471	perinuclear region of cytoplasm	CC	711	2	0.0830889
GO:0002020	protease binding	MF	128	1	0.0840268
GO:0005794	Golgi apparatus	CC	1560	3	0.0852697
GO:0050671	positive regulation of lymphocyte proliferation	BP	130	1	0.0852861
GO:0030183	B cell differentiation	BP	131	1	0.0859151
GO:0032946	positive regulation of mononuclear cell proliferation	BP	131	1	0.0859151
GO:0005319	lipid transporter activity	MF	131	1	0.0859151
GO:0042476	odontogenesis	BP	132	1	0.0865437
GO:0045335	phagocytic vesicle	CC	132	1	0.0865437
GO:0005178	integrin binding	MF	132	1	0.0865437
GO:0055080	cation homeostasis	BP	730	2	0.0869519
GO:0046683	response to organophosphorus	BP	134	1	0.0877998
GO:0030260	entry into host cell	BP	134	1	0.0877998
GO:0044409	entry into host	BP	134	1	0.0877998
GO:0051806	entry into cell of other organism involved in symbiotic interaction	BP	134	1	0.0877998
GO:0051828	entry into other organism involved in symbiotic interaction	BP	134	1	0.0877998
GO:0070848	response to growth factor	BP	736	2	0.0881836
GO:1903825	organic acid transmembrane transport	BP	135	1	0.0884272
GO:1905039	carboxylic acid transmembrane transport	BP	135	1	0.0884272
GO:0098771	inorganic ion homeostasis	BP	741	2	0.0892143
GO:0008584	male gonad development	BP	138	1	0.0903071
GO:0016491	oxidoreductase activity	MF	748	2	0.0906637
GO:0007586	digestion	BP	139	1	0.090933
GO:0006720	isoprenoid metabolic process	BP	139	1	0.090933
GO:0046546	development of primary male sexual characteristics	BP	139	1	0.090933
GO:0070665	positive regulation of leukocyte proliferation	BP	139	1	0.090933
GO:0002831	regulation of response to biotic stimulus	BP	139	1	0.090933
GO:0072073	kidney epithelium development	BP	140	1	0.0915584
GO:0097530	granulocyte migration	BP	141	1	0.0921834
GO:0008286	insulin receptor signaling pathway	BP	141	1	0.0921834
GO:0009056	catabolic process	BP	2615	4	0.0927706
GO:0106106	cold-induced thermogenesis	BP	143	1	0.0934323
GO:0120161	regulation of cold-induced thermogenesis	BP	143	1	0.0934323
GO:0032991	protein-containing complex	CC	6151	7	0.0935321
GO:0030534	adult behavior	BP	144	1	0.0940561
GO:0005488	binding	MF	15267	13	0.0941263
GO:0006865	amino acid transport	BP	145	1	0.0946796
GO:0007612	learning	BP	145	1	0.0946796
GO:0051384	response to glucocorticoid	BP	146	1	0.0953026
GO:0002224	toll-like receptor signaling pathway	BP	146	1	0.0953026
GO:0030659	cytoplasmic vesicle membrane	CC	773	2	0.0959
GO:0071236	cellular response to antibiotic	BP	147	1	0.0959253
GO:0002262	myeloid cell homeostasis	BP	147	1	0.0959253
GO:0010212	response to ionizing radiation	BP	147	1	0.0959253
GO:0030855	epithelial cell differentiation	BP	775	2	0.0963228
GO:0051592	response to calcium ion	BP	148	1	0.0965475
GO:0051668	localization within membrane	BP	148	1	0.0965475
GO:0014074	response to purine-containing compound	BP	149	1	0.0971693
GO:0008277	regulation of G protein-coupled receptor signaling pathway	BP	149	1	0.0971693
GO:0051092	positive regulation of NF-kappaB transcription factor activity	BP	149	1	0.0971693
GO:0098862	cluster of actin-based cell projections	CC	150	1	0.0977908
GO:0009719	response to endogenous stimulus	BP	1658	3	0.0983696
GO:0098805	whole membrane	CC	1666	3	0.0994761
GO:0030168	platelet activation	BP	153	1	0.0996528
GO:0042133	neurotransmitter metabolic process	BP	153	1	0.0996528
GO:0005342	organic acid transmembrane transporter activity	MF	153	1	0.0996528
GO:0046943	carboxylic acid transmembrane transporter activity	MF	153	1	0.0996528
GO:0010770	positive regulation of cell morphogenesis involved in differentiation	BP	154	1	0.100273
GO:1990845	adaptive thermogenesis	BP	154	1	0.100273
GO:0061025	membrane fusion	BP	154	1	0.100273
GO:0009898	cytoplasmic side of plasma membrane	CC	154	1	0.100273
GO:0012506	vesicle membrane	CC	794	2	0.100369
GO:1903707	negative regulation of hemopoiesis	BP	155	1	0.100892
GO:0042129	regulation of T cell proliferation	BP	156	1	0.101511
GO:0009967	positive regulation of signal transduction	BP	1685	3	0.102126
GO:0048585	negative regulation of response to stimulus	BP	1693	3	0.103251
GO:0032680	regulation of tumor necrosis factor production	BP	160	1	0.103983
GO:0007519	skeletal muscle tissue development	BP	160	1	0.103983
GO:0046661	male sex differentiation	BP	160	1	0.103983
GO:0030203	glycosaminoglycan metabolic process	BP	160	1	0.103983
GO:0055082	cellular chemical homeostasis	BP	812	2	0.104248
GO:0031960	response to corticosteroid	BP	162	1	0.105217
GO:0032640	tumor necrosis factor production	BP	163	1	0.105834
GO:1903555	regulation of tumor necrosis factor superfamily cytokine production	BP	163	1	0.105834
GO:0099173	postsynapse organization	BP	163	1	0.105834
GO:0031214	biomineral tissue development	BP	163	1	0.105834
GO:0007088	regulation of mitotic nuclear division	BP	164	1	0.106449
GO:0050680	negative regulation of epithelial cell proliferation	BP	165	1	0.107065
GO:0071695	anatomical structure maturation	BP	165	1	0.107065
GO:0019897	extrinsic component of plasma membrane	CC	165	1	0.107065
GO:0090288	negative regulation of cellular response to growth factor stimulus	BP	166	1	0.10768
GO:0035051	cardiocyte differentiation	BP	167	1	0.108295
GO:0016032	viral process	BP	833	2	0.108829
GO:0034614	cellular response to reactive oxygen species	BP	168	1	0.108909
GO:0071706	tumor necrosis factor superfamily cytokine production	BP	168	1	0.108909
GO:0060538	skeletal muscle organ development	BP	169	1	0.109523
GO:0038095	Fc-epsilon receptor signaling pathway	BP	169	1	0.109523
GO:0140056	organelle localization by membrane tethering	BP	169	1	0.109523
GO:0050789	regulation of biological process	BP	12093	11	0.109784
GO:0043168	anion binding	MF	2773	4	0.10991
GO:0030674	protein binding, bridging	MF	170	1	0.110137
GO:0098609	cell-cell adhesion	BP	839	2	0.110148
GO:0043901	negative regulation of multi-organism process	BP	171	1	0.11075
GO:0030324	lung development	BP	172	1	0.111363
GO:0044464	cell part	CC	17521	14	0.111816
GO:0001659	temperature homeostasis	BP	173	1	0.111975
GO:0017144	drug metabolic process	BP	851	2	0.112801
GO:0002478	antigen processing and presentation of exogenous peptide antigen	BP	175	1	0.113199
GO:0004866	endopeptidase inhibitor activity	MF	175	1	0.113199
GO:0032501	multicellular organismal process	BP	7751	8	0.113484
GO:0030323	respiratory tube development	BP	176	1	0.11381
GO:0001936	regulation of endothelial cell proliferation	BP	176	1	0.11381
GO:0005741	mitochondrial outer membrane	CC	178	1	0.115031
GO:0098562	cytoplasmic side of membrane	CC	178	1	0.115031
GO:0048736	appendage development	BP	179	1	0.115641
GO:0060173	limb development	BP	179	1	0.115641
GO:0071347	cellular response to interleukin-1	BP	179	1	0.115641
GO:0071346	cellular response to interferon-gamma	BP	180	1	0.116251
GO:0019887	protein kinase regulator activity	MF	180	1	0.116251
GO:0010565	regulation of cellular ketone metabolic process	BP	181	1	0.11686
GO:0008217	regulation of blood pressure	BP	182	1	0.117469
GO:0019884	antigen processing and presentation of exogenous antigen	BP	182	1	0.117469
GO:0030414	peptidase inhibitor activity	MF	182	1	0.117469
GO:0061135	endopeptidase regulator activity	MF	182	1	0.117469
GO:0043123	positive regulation of I-kappaB kinase/NF-kappaB signaling	BP	183	1	0.118077
GO:0005623	cell	CC	17590	14	0.118144
GO:0042098	T cell proliferation	BP	184	1	0.118685
GO:1905475	regulation of protein localization to membrane	BP	187	1	0.120507
GO:0008022	protein C-terminus binding	MF	187	1	0.120507
GO:0030097	hemopoiesis	BP	887	2	0.120866
GO:0043902	positive regulation of multi-organism process	BP	188	1	0.121114
GO:0051783	regulation of nuclear division	BP	188	1	0.121114
GO:0048002	antigen processing and presentation of peptide antigen	BP	189	1	0.12172
GO:0061024	membrane organization	BP	892	2	0.121998
GO:0006518	peptide metabolic process	BP	894	2	0.122452
GO:0001935	endothelial cell proliferation	BP	191	1	0.122931
GO:0097223	sperm part	CC	191	1	0.122931
GO:0044272	sulfur compound biosynthetic process	BP	192	1	0.123536
GO:0050778	positive regulation of immune response	BP	902	2	0.124271
GO:1902115	regulation of organelle assembly	BP	194	1	0.124745
GO:0005768	endosome	CC	905	2	0.124955
GO:0010647	positive regulation of cell communication	BP	1844	3	0.12546
GO:0065008	regulation of biological quality	BP	4057	5	0.125543
GO:0023056	positive regulation of signaling	BP	1851	3	0.126533
GO:0002221	pattern recognition receptor signaling pathway	BP	197	1	0.126555
GO:0060541	respiratory system development	BP	198	1	0.127157
GO:0014070	response to organic cyclic compound	BP	915	2	0.127243
GO:0034341	response to interferon-gamma	BP	199	1	0.12776
GO:0016052	carbohydrate catabolic process	BP	199	1	0.12776
GO:0007179	transforming growth factor beta receptor signaling pathway	BP	199	1	0.12776
GO:0003674	molecular_function	MF	17697	14	0.128617
GO:0031968	organelle outer membrane	CC	201	1	0.128963
GO:0006575	cellular modified amino acid metabolic process	BP	202	1	0.129564
GO:0050870	positive regulation of T cell activation	BP	202	1	0.129564
GO:0006508	proteolysis	BP	1874	3	0.130084
GO:0030278	regulation of ossification	BP	203	1	0.130165
GO:0019867	outer membrane	CC	203	1	0.130165
GO:0048534	hematopoietic or lymphoid organ development	BP	929	2	0.130465
GO:0002573	myeloid leukocyte differentiation	BP	204	1	0.130765
GO:0097164	ammonium ion metabolic process	BP	205	1	0.131365
GO:0050679	positive regulation of epithelial cell proliferation	BP	206	1	0.131965
GO:0002064	epithelial cell development	BP	207	1	0.132564
GO:0070555	response to interleukin-1	BP	207	1	0.132564
GO:0019207	kinase regulator activity	MF	207	1	0.132564
GO:1901215	negative regulation of neuron death	BP	208	1	0.133163
GO:0050670	regulation of lymphocyte proliferation	BP	208	1	0.133163
GO:0098858	actin-based cell projection	CC	208	1	0.133163
GO:0032944	regulation of mononuclear cell proliferation	BP	209	1	0.133761
GO:0051701	interaction with host	BP	209	1	0.133761
GO:0098657	import into cell	BP	945	2	0.134172
GO:0097529	myeloid leukocyte migration	BP	210	1	0.134359
GO:0008514	organic anion transmembrane transporter activity	MF	211	1	0.134957
GO:0036464	cytoplasmic ribonucleoprotein granule	CC	212	1	0.135554
GO:0060284	regulation of cell development	BP	953	2	0.136036
GO:0042592	homeostatic process	BP	1916	3	0.136669
GO:0015893	drug transport	BP	214	1	0.136747
GO:0010810	regulation of cell-substrate adhesion	BP	215	1	0.137343
GO:0032869	cellular response to insulin stimulus	BP	216	1	0.137939
GO:0017157	regulation of exocytosis	BP	217	1	0.138535
GO:0060348	bone development	BP	217	1	0.138535
GO:0008406	gonad development	BP	217	1	0.138535
GO:0016323	basolateral plasma membrane	CC	217	1	0.138535
GO:0050807	regulation of synapse organization	BP	218	1	0.13913
GO:0019722	calcium-mediated signaling	BP	218	1	0.13913
GO:1903039	positive regulation of leukocyte cell-cell adhesion	BP	218	1	0.13913
GO:0007584	response to nutrient	BP	219	1	0.139724
GO:0061134	peptidase regulator activity	MF	219	1	0.139724
GO:0019725	cellular homeostasis	BP	970	2	0.140017
GO:0002526	acute inflammatory response	BP	220	1	0.140318
GO:0044431	Golgi apparatus part	CC	974	2	0.140958
GO:1901605	alpha-amino acid metabolic process	BP	222	1	0.141506
GO:0070663	regulation of leukocyte proliferation	BP	222	1	0.141506
GO:0045137	development of primary sexual characteristics	BP	223	1	0.142099
GO:0035770	ribonucleoprotein granule	CC	223	1	0.142099
GO:0097191	extrinsic apoptotic signaling pathway	BP	224	1	0.142691
GO:0030595	leukocyte chemotaxis	BP	224	1	0.142691
GO:0043226	organelle	CC	14144	12	0.142812
GO:0007160	cell-matrix adhesion	BP	225	1	0.143284
GO:0001649	osteoblast differentiation	BP	225	1	0.143284
GO:0002520	immune system development	BP	985	2	0.143554
GO:0019882	antigen processing and presentation	BP	226	1	0.143876
GO:0009725	response to hormone	BP	987	2	0.144027
GO:0001894	tissue homeostasis	BP	227	1	0.144467
GO:0050803	regulation of synapse structure or activity	BP	227	1	0.144467
GO:0045597	positive regulation of cell differentiation	BP	991	2	0.144975
GO:0050794	regulation of cellular process	BP	11022	10	0.145384
GO:0065003	protein-containing complex assembly	BP	1971	3	0.145483
GO:0055114	oxidation-reduction process	BP	999	2	0.146874
GO:0042445	hormone metabolic process	BP	232	1	0.147419
GO:0006468	protein phosphorylation	BP	1983	3	0.147434
GO:0097305	response to alcohol	BP	233	1	0.148008
GO:0006915	apoptotic process	BP	1988	3	0.14825
GO:0043122	regulation of I-kappaB kinase/NF-kappaB signaling	BP	237	1	0.150362
GO:0031669	cellular response to nutrient levels	BP	237	1	0.150362
GO:0060090	molecular adaptor activity	MF	237	1	0.150362
GO:0015291	secondary active transmembrane transporter activity	MF	237	1	0.150362
GO:0001934	positive regulation of protein phosphorylation	BP	1017	2	0.151169
GO:0048705	skeletal system morphogenesis	BP	239	1	0.151536
GO:2000116	regulation of cysteine-type endopeptidase activity	BP	239	1	0.151536
GO:0022607	cellular component assembly	BP	3116	4	0.152045
GO:0060548	negative regulation of cell death	BP	1023	2	0.152608
GO:0038093	Fc receptor signaling pathway	BP	241	1	0.152709
GO:0090092	regulation of transmembrane receptor protein serine/threonine kinase signaling pathway	BP	241	1	0.152709
GO:0048872	homeostasis of number of cells	BP	246	1	0.155634
GO:0097237	cellular response to toxic substance	BP	247	1	0.156218
GO:0042180	cellular ketone metabolic process	BP	248	1	0.156802
GO:0071560	cellular response to transforming growth factor beta stimulus	BP	249	1	0.157385
GO:0022857	transmembrane transporter activity	MF	1045	2	0.157907
GO:0010951	negative regulation of endopeptidase activity	BP	250	1	0.157968
GO:0045637	regulation of myeloid cell differentiation	BP	251	1	0.158551
GO:0021537	telencephalon development	BP	251	1	0.158551
GO:0071559	response to transforming growth factor beta	BP	255	1	0.160877
GO:0022409	positive regulation of cell-cell adhesion	BP	255	1	0.160877
GO:0007611	learning or memory	BP	256	1	0.161457
GO:0009887	animal organ morphogenesis	BP	1068	2	0.16349
GO:0042327	positive regulation of phosphorylation	BP	1068	2	0.16349
GO:0098588	bounding membrane of organelle	CC	2081	3	0.163721
GO:0051091	positive regulation of DNA-binding transcription factor activity	BP	261	1	0.164355
GO:0065007	biological regulation	BP	12777	11	0.164924
GO:0010466	negative regulation of peptidase activity	BP	262	1	0.164933
GO:0140014	mitotic nuclear division	BP	264	1	0.166089
GO:1902533	positive regulation of intracellular signal transduction	BP	1082	2	0.166908
GO:0046914	transition metal ion binding	MF	1085	2	0.167643
GO:0006836	neurotransmitter transport	BP	269	1	0.168972
GO:0007249	I-kappaB kinase/NF-kappaB signaling	BP	269	1	0.168972
GO:0007548	sex differentiation	BP	270	1	0.169547
GO:1901617	organic hydroxy compound biosynthetic process	BP	271	1	0.170122
GO:0032868	response to insulin	BP	272	1	0.170697
GO:0046651	lymphocyte proliferation	BP	272	1	0.170697
GO:1902105	regulation of leukocyte differentiation	BP	272	1	0.170697
GO:0098742	cell-cell adhesion via plasma-membrane adhesion molecules	BP	273	1	0.171271
GO:0032943	mononuclear cell proliferation	BP	274	1	0.171845
GO:0031974	membrane-enclosed lumen	CC	5740	6	0.172079
GO:0043233	organelle lumen	CC	5740	6	0.172079
GO:0070013	intracellular organelle lumen	CC	5740	6	0.172079
GO:0012501	programmed cell death	BP	2132	3	0.172434
GO:0035295	tube development	BP	1110	2	0.173789
GO:0001822	kidney development	BP	278	1	0.174137
GO:0021700	developmental maturation	BP	284	1	0.177564
GO:0042623	ATPase activity, coupled	MF	284	1	0.177564
GO:0140096	catalytic activity, acting on a protein	MF	2165	3	0.178154
GO:0098656	anion transmembrane transport	BP	288	1	0.179842
GO:0005215	transporter activity	MF	1140	2	0.181221
GO:0010562	positive regulation of phosphorus metabolic process	BP	1141	2	0.18147
GO:0045937	positive regulation of phosphate metabolic process	BP	1141	2	0.18147
GO:0090287	regulation of cellular response to growth factor stimulus	BP	292	1	0.182113
GO:0072001	renal system development	BP	293	1	0.18268
GO:0098802	plasma membrane receptor complex	CC	295	1	0.183813
GO:0019898	extrinsic component of membrane	CC	295	1	0.183813
GO:0050890	cognition	BP	296	1	0.184379
GO:0001818	negative regulation of cytokine production	BP	296	1	0.184379
GO:0044085	cellular component biogenesis	BP	3355	4	0.185014
GO:0043603	cellular amide metabolic process	BP	1157	2	0.185459
GO:0070661	leukocyte proliferation	BP	298	1	0.185509
GO:0002758	innate immune response-activating signal transduction	BP	298	1	0.185509
GO:0010769	regulation of cell morphogenesis involved in differentiation	BP	301	1	0.187203
GO:0043231	intracellular membrane-bounded organelle	CC	11488	10	0.188176
GO:0030139	endocytic vesicle	CC	303	1	0.18833
GO:1903037	regulation of leukocyte cell-cell adhesion	BP	304	1	0.188893
GO:0034220	ion transmembrane transport	BP	1182	2	0.191722
GO:0042113	B cell activation	BP	310	1	0.192263
GO:1901214	regulation of neuron death	BP	313	1	0.193943
GO:0009416	response to light stimulus	BP	314	1	0.194502
GO:0050863	regulation of T cell activation	BP	314	1	0.194502
GO:0043010	camera-type eye development	BP	314	1	0.194502
GO:0045121	membrane raft	CC	315	1	0.195061
GO:0006898	receptor-mediated endocytosis	BP	316	1	0.19562
GO:0098857	membrane microdomain	CC	316	1	0.19562
GO:0008219	cell death	BP	2264	3	0.195672
GO:0002218	activation of innate immune response	BP	319	1	0.197294
GO:0007568	aging	BP	321	1	0.198408
GO:0071375	cellular response to peptide hormone stimulus	BP	321	1	0.198408
GO:0048856	anatomical structure development	BP	5988	6	0.200303
GO:0043933	protein-containing complex subunit organization	BP	2290	3	0.200357
GO:0051188	cofactor biosynthetic process	BP	326	1	0.201186
GO:0009615	response to virus	BP	326	1	0.201186
GO:0008509	anion transmembrane transporter activity	MF	327	1	0.201741
GO:0098589	membrane region	CC	328	1	0.202295
GO:0051235	maintenance of location	BP	330	1	0.203403
GO:0001655	urogenital system development	BP	330	1	0.203403
GO:0045296	cadherin binding	MF	331	1	0.203956
GO:0015849	organic acid transport	BP	333	1	0.205062
GO:0046942	carboxylic acid transport	BP	333	1	0.205062
GO:0051251	positive regulation of lymphocyte activation	BP	334	1	0.205614
GO:0071902	positive regulation of protein serine/threonine kinase activity	BP	334	1	0.205614
GO:0009628	response to abiotic stimulus	BP	1237	2	0.205622
GO:0031401	positive regulation of protein modification process	BP	1237	2	0.205622
GO:0060070	canonical Wnt signaling pathway	BP	335	1	0.206166
GO:0007596	blood coagulation	BP	336	1	0.206717
GO:0007159	leukocyte cell-cell adhesion	BP	337	1	0.207268
GO:0007599	hemostasis	BP	341	1	0.209469
GO:0050817	coagulation	BP	342	1	0.210018
GO:0010721	negative regulation of cell development	BP	344	1	0.211116
GO:0031253	cell projection membrane	CC	345	1	0.211664
GO:0033043	regulation of organelle organization	BP	1261	2	0.211734
GO:0010646	regulation of cell communication	BP	3542	4	0.212604
GO:1901135	carbohydrate derivative metabolic process	BP	1266	2	0.213011
GO:0070997	neuron death	BP	348	1	0.213307
GO:0007178	transmembrane receptor protein serine/threonine kinase signaling pathway	BP	349	1	0.213854
GO:0005769	early endosome	CC	350	1	0.2144
GO:0030098	lymphocyte differentiation	BP	353	1	0.216038
GO:0005765	lysosomal membrane	CC	354	1	0.216583
GO:0098852	lytic vacuole membrane	CC	355	1	0.217128
GO:0001666	response to hypoxia	BP	359	1	0.219303
GO:0060429	epithelium development	BP	1291	2	0.219409
GO:0023051	regulation of signaling	BP	3591	4	0.220067
GO:0001654	eye development	BP	362	1	0.220931
GO:0051336	regulation of hydrolase activity	BP	1297	2	0.220948
GO:0045861	negative regulation of proteolysis	BP	363	1	0.221473
GO:0005515	protein binding	MF	11807	10	0.221691
GO:0032102	negative regulation of response to external stimulus	BP	365	1	0.222556
GO:0006869	lipid transport	BP	365	1	0.222556
GO:0006520	cellular amino acid metabolic process	BP	366	1	0.223097
GO:0150063	visual system development	BP	366	1	0.223097
GO:0016310	phosphorylation	BP	2417	3	0.223693
GO:0035690	cellular response to drug	BP	369	1	0.224717
GO:0009968	negative regulation of signal transduction	BP	1313	2	0.225059
GO:0036293	response to decreased oxygen levels	BP	370	1	0.225257
GO:0048880	sensory system development	BP	371	1	0.225796
GO:0006790	sulfur compound metabolic process	BP	372	1	0.226335
GO:0004857	enzyme inhibitor activity	MF	375	1	0.227949
GO:0050678	regulation of epithelial cell proliferation	BP	378	1	0.22956
GO:0048731	system development	BP	4918	5	0.229784
GO:0002696	positive regulation of leukocyte activation	BP	380	1	0.230632
GO:0045089	positive regulation of innate immune response	BP	381	1	0.231168
GO:0030900	forebrain development	BP	381	1	0.231168
GO:0031346	positive regulation of cell projection organization	BP	383	1	0.232238
GO:0045177	apical part of cell	CC	384	1	0.232773
GO:0016887	ATPase activity	MF	384	1	0.232773
GO:0048545	response to steroid hormone	BP	385	1	0.233307
GO:0014706	striated muscle tissue development	BP	390	1	0.235974
GO:0030133	transport vesicle	CC	392	1	0.237038
GO:0070482	response to oxygen levels	BP	394	1	0.2381
GO:0050867	positive regulation of cell activation	BP	394	1	0.2381
GO:0001503	ossification	BP	398	1	0.240222
GO:0044424	intracellular part	CC	15063	12	0.240513
GO:1903532	positive regulation of secretion by cell	BP	399	1	0.240751
GO:0010876	lipid localization	BP	400	1	0.24128
GO:0005622	intracellular	CC	15073	12	0.241783
GO:0022407	regulation of cell-cell adhesion	BP	403	1	0.242865
GO:0043547	positive regulation of GTPase activity	BP	405	1	0.243921
GO:0005925	focal adhesion	CC	405	1	0.243921
GO:0062023	collagen-containing extracellular matrix	CC	406	1	0.244448
GO:0000280	nuclear division	BP	407	1	0.244974
GO:0050808	synapse organization	BP	408	1	0.245501
GO:0060537	muscle tissue development	BP	408	1	0.245501
GO:0005924	cell-substrate adherens junction	CC	408	1	0.245501
GO:0071495	cellular response to endogenous stimulus	BP	1393	2	0.245735
GO:0007517	muscle organ development	BP	410	1	0.246553
GO:0005774	vacuolar membrane	CC	412	1	0.247603
GO:0030055	cell-substrate junction	CC	412	1	0.247603
GO:0030099	myeloid cell differentiation	BP	416	1	0.2497
GO:0051094	positive regulation of developmental process	BP	1418	2	0.25223
GO:0010648	negative regulation of cell communication	BP	1419	2	0.25249
GO:0032502	developmental process	BP	6411	6	0.253081
GO:0023057	negative regulation of signaling	BP	1423	2	0.253531
GO:0043085	positive regulation of catalytic activity	BP	1424	2	0.253791
GO:0052548	regulation of endopeptidase activity	BP	425	1	0.254397
GO:0071704	organic substance metabolic process	BP	12093	10	0.254616
GO:0051047	positive regulation of secretion	BP	428	1	0.255957
GO:0048608	reproductive structure development	BP	431	1	0.257514
GO:0051090	regulation of DNA-binding transcription factor activity	BP	432	1	0.258032
GO:0050673	epithelial cell proliferation	BP	434	1	0.259068
GO:0061458	reproductive system development	BP	434	1	0.259068
GO:0043434	response to peptide hormone	BP	436	1	0.260102
GO:0050804	modulation of chemical synaptic transmission	BP	436	1	0.260102
GO:0060249	anatomical structure homeostasis	BP	437	1	0.260619
GO:0099177	regulation of trans-synaptic signaling	BP	437	1	0.260619
GO:0010256	endomembrane system organization	BP	438	1	0.261135
GO:0019932	second-messenger-mediated signaling	BP	439	1	0.261651
GO:0001932	regulation of protein phosphorylation	BP	1465	2	0.264473
GO:0048285	organelle fission	BP	449	1	0.266792
GO:0045088	regulation of innate immune response	BP	452	1	0.268327
GO:0052547	regulation of peptidase activity	BP	452	1	0.268327
GO:0062012	regulation of small molecule metabolic process	BP	459	1	0.271899
GO:0008150	biological_process	BP	18670	14	0.272169
GO:0002683	negative regulation of immune system process	BP	463	1	0.273933
GO:0042110	T cell activation	BP	464	1	0.27444
GO:0051346	negative regulation of hydrolase activity	BP	466	1	0.275455
GO:0006807	nitrogen compound metabolic process	BP	10812	9	0.277791
GO:0009987	cellular process	BP	16968	13	0.278756
GO:1903706	regulation of hemopoiesis	BP	475	1	0.280002
GO:0043087	regulation of GTPase activity	BP	479	1	0.282015
GO:0015711	organic anion transport	BP	482	1	0.283521
GO:0034248	regulation of cellular amide metabolic process	BP	483	1	0.284023
GO:0022604	regulation of cell morphogenesis	BP	484	1	0.284524
GO:0009653	anatomical structure morphogenesis	BP	2735	3	0.284744
GO:0051249	regulation of lymphocyte activation	BP	485	1	0.285024
GO:0005739	mitochondrion	CC	1573	2	0.292698
GO:0050878	regulation of body fluid levels	BP	501	1	0.292992
GO:0043235	receptor complex	CC	505	1	0.294971
GO:0046982	protein heterodimerization activity	MF	505	1	0.294971
GO:0002768	immune response-regulating cell surface receptor signaling pathway	BP	506	1	0.295465
GO:0048037	cofactor binding	MF	506	1	0.295465
GO:0015629	actin cytoskeleton	CC	507	1	0.295959
GO:0042981	regulation of apoptotic process	BP	1587	2	0.29636
GO:0055085	transmembrane transport	BP	1598	2	0.299238
GO:0071900	regulation of protein serine/threonine kinase activity	BP	515	1	0.299896
GO:0001501	skeletal system development	BP	518	1	0.301367
GO:0016055	Wnt signaling pathway	BP	519	1	0.301857
GO:0008047	enzyme activator activity	MF	519	1	0.301857
GO:0032270	positive regulation of cellular protein metabolic process	BP	1611	2	0.302638
GO:0198738	cell-cell signaling by wnt	BP	521	1	0.302836
GO:0031349	positive regulation of defense response	BP	521	1	0.302836
GO:0043067	regulation of programmed cell death	BP	1613	2	0.303161
GO:0042325	regulation of phosphorylation	BP	1614	2	0.303422
GO:1903827	regulation of cellular protein localization	BP	524	1	0.304301
GO:0031012	extracellular matrix	CC	526	1	0.305277
GO:0010817	regulation of hormone levels	BP	529	1	0.306737
GO:0007005	mitochondrion organization	BP	530	1	0.307224
GO:0045860	positive regulation of protein kinase activity	BP	532	1	0.308195
GO:0060627	regulation of vesicle-mediated transport	BP	532	1	0.308195
GO:0080134	regulation of response to stress	BP	1645	2	0.311527
GO:0044089	positive regulation of cellular component biogenesis	BP	540	1	0.312069
GO:0008015	blood circulation	BP	541	1	0.312552
GO:0007267	cell-cell signaling	BP	1650	2	0.312833
GO:0008152	metabolic process	BP	12552	10	0.312869
GO:0007275	multicellular organism development	BP	5491	5	0.313021
GO:0022411	cellular component disassembly	BP	546	1	0.314961
GO:0043410	positive regulation of MAPK cascade	BP	546	1	0.314961
GO:0005912	adherens junction	CC	546	1	0.314961
GO:0007423	sensory organ development	BP	548	1	0.315923
GO:0003013	circulatory system process	BP	551	1	0.317363
GO:0031090	organelle membrane	CC	2903	3	0.318014
GO:0010720	positive regulation of cell development	BP	553	1	0.318321
GO:0070161	anchoring junction	CC	562	1	0.322618
GO:0006811	ion transport	BP	1696	2	0.324842
GO:0002694	regulation of leukocyte activation	BP	571	1	0.326891
GO:0035556	intracellular signal transduction	BP	2952	3	0.327796
GO:0033674	positive regulation of kinase activity	BP	573	1	0.327837
GO:0051247	positive regulation of protein metabolic process	BP	1713	2	0.329274
GO:0008144	drug binding	MF	1727	2	0.33292
GO:0007507	heart development	BP	587	1	0.334424
GO:0010941	regulation of cell death	BP	1736	2	0.335263
GO:0007610	behavior	BP	594	1	0.337695
GO:0040017	positive regulation of locomotion	BP	598	1	0.339557
GO:0097190	apoptotic signaling pathway	BP	602	1	0.341415
GO:0051186	cofactor metabolic process	BP	602	1	0.341415
GO:0044093	positive regulation of molecular function	BP	1771	2	0.34436
GO:0050865	regulation of cell activation	BP	614	1	0.346959
GO:0072657	protein localization to membrane	BP	621	1	0.350173
GO:1905114	cell surface receptor signaling pathway involved in cell-cell signaling	BP	622	1	0.350631
GO:0010638	positive regulation of organelle organization	BP	623	1	0.351088
GO:0005975	carbohydrate metabolic process	BP	625	1	0.352003
GO:0006820	anion transport	BP	629	1	0.353828
GO:0051240	positive regulation of multicellular organismal process	BP	1811	2	0.354726
GO:0019220	regulation of phosphate metabolic process	BP	1816	2	0.356019
GO:0051174	regulation of phosphorus metabolic process	BP	1818	2	0.356536
GO:0002757	immune response-activating signal transduction	BP	641	1	0.359275
GO:0051347	positive regulation of transferase activity	BP	649	1	0.362882
GO:0019901	protein kinase binding	MF	651	1	0.363781
GO:0007346	regulation of mitotic cell cycle	BP	656	1	0.366023
GO:0031399	regulation of protein modification process	BP	1867	2	0.369175
GO:0009966	regulation of signal transduction	BP	3170	3	0.371527
GO:0045595	regulation of cell differentiation	BP	1878	2	0.372003
GO:0051049	regulation of transport	BP	1879	2	0.37226
GO:0003006	developmental process involved in reproduction	BP	676	1	0.374918
GO:0031344	regulation of cell projection organization	BP	682	1	0.377564
GO:0005783	endoplasmic reticulum	CC	1911	2	0.380466
GO:0031966	mitochondrial membrane	CC	698	1	0.384569
GO:0051223	regulation of protein transport	BP	699	1	0.385005
GO:0032870	cellular response to hormone stimulus	BP	701	1	0.385875
GO:0051640	organelle localization	BP	701	1	0.385875
GO:0007268	chemical synaptic transmission	BP	703	1	0.386743
GO:0098916	anterograde trans-synaptic signaling	BP	703	1	0.386743
GO:0099537	trans-synaptic signaling	BP	711	1	0.390207
GO:0019439	aromatic compound catabolic process	BP	712	1	0.390639
GO:1901566	organonitrogen compound biosynthetic process	BP	1957	2	0.392206
GO:0099536	synaptic signaling	BP	717	1	0.392793
GO:1902531	regulation of intracellular signal transduction	BP	1961	2	0.393224
GO:0001817	regulation of cytokine production	BP	719	1	0.393652
GO:0007169	transmembrane receptor protein tyrosine kinase signaling pathway	BP	719	1	0.393652
GO:0002253	activation of immune response	BP	724	1	0.395797
GO:0090087	regulation of peptide transport	BP	729	1	0.397934
GO:0019900	kinase binding	MF	730	1	0.39836
GO:0007420	brain development	BP	733	1	0.399638
GO:0046649	lymphocyte activation	BP	733	1	0.399638
GO:0008289	lipid binding	MF	734	1	0.400064
GO:0006796	phosphate-containing compound metabolic process	BP	3320	3	0.401625
GO:0043043	peptide biosynthetic process	BP	739	1	0.402187
GO:0005740	mitochondrial envelope	CC	739	1	0.402187
GO:0000904	cell morphogenesis involved in differentiation	BP	744	1	0.404303
GO:1901361	organic cyclic compound catabolic process	BP	745	1	0.404725
GO:0070201	regulation of establishment of protein localization	BP	746	1	0.405148
GO:0080135	regulation of cellular response to stress	BP	746	1	0.405148
GO:0006793	phosphorus metabolic process	BP	3347	3	0.407028
GO:1903530	regulation of secretion by cell	BP	753	1	0.408095
GO:0000139	Golgi membrane	CC	754	1	0.408515
GO:0045596	negative regulation of cell differentiation	BP	755	1	0.408934
GO:0010604	positive regulation of macromolecule metabolic process	BP	3366	3	0.410827
GO:0008285	negative regulation of cell proliferation	BP	760	1	0.411028
GO:0043408	regulation of MAPK cascade	BP	768	1	0.414364
GO:0051345	positive regulation of hydrolase activity	BP	771	1	0.415611
GO:0005198	structural molecule activity	MF	772	1	0.416026
GO:1901137	carbohydrate derivative biosynthetic process	BP	773	1	0.41644
GO:0060322	head development	BP	776	1	0.417683
GO:0033554	cellular response to stress	BP	2069	2	0.42047
GO:0010564	regulation of cell cycle process	BP	789	1	0.423038
GO:0001816	cytokine production	BP	790	1	0.423448
GO:0045859	regulation of protein kinase activity	BP	792	1	0.424267
GO:0043167	ion binding	MF	6218	5	0.427237
GO:0120025	plasma membrane bounded cell projection	CC	2103	2	0.428949
GO:0051046	regulation of secretion	BP	811	1	0.431997
GO:0043086	negative regulation of catalytic activity	BP	815	1	0.433612
GO:0015318	inorganic molecular entity transmembrane transporter activity	MF	817	1	0.434417
GO:0006897	endocytosis	BP	820	1	0.435624
GO:0030162	regulation of proteolysis	BP	831	1	0.440029
GO:0070925	organelle assembly	BP	845	1	0.445588
GO:0042995	cell projection	CC	2178	2	0.447471
GO:0098791	Golgi subcompartment	CC	859	1	0.451096
GO:0005856	cytoskeleton	CC	2197	2	0.452121
GO:0017111	nucleoside-triphosphatase activity	MF	865	1	0.453441
GO:0043549	regulation of kinase activity	BP	870	1	0.455389
GO:1903047	mitotic cell cycle process	BP	873	1	0.456554
GO:0003008	system process	BP	2216	2	0.456753
GO:0019899	enzyme binding	MF	2217	2	0.456996
GO:0043604	amide biosynthetic process	BP	876	1	0.457717
GO:0015075	ion transmembrane transporter activity	MF	880	1	0.459264
GO:0009893	positive regulation of metabolic process	BP	3642	3	0.465475
GO:0031347	regulation of defense response	BP	901	1	0.467318
GO:0060341	regulation of cellular localization	BP	906	1	0.469219
GO:0043066	negative regulation of apoptotic process	BP	911	1	0.471114
GO:0032101	regulation of response to external stimulus	BP	913	1	0.47187
GO:0016462	pyrophosphatase activity	MF	914	1	0.472248
GO:0016817	hydrolase activity, acting on acid anhydrides	MF	917	1	0.473379
GO:0016818	hydrolase activity, acting on acid anhydrides, in phosphorus-containing anhydrides	MF	917	1	0.473379
GO:0030163	protein catabolic process	BP	931	1	0.478631
GO:0043069	negative regulation of programmed cell death	BP	932	1	0.479004
GO:0044248	cellular catabolic process	BP	2324	2	0.482731
GO:0050790	regulation of catalytic activity	BP	2328	2	0.483682
GO:0044087	regulation of cellular component biogenesis	BP	954	1	0.487152
GO:0000165	MAPK cascade	BP	958	1	0.488621
GO:0023014	signal transduction by protein phosphorylation	BP	969	1	0.49264
GO:0051338	regulation of transferase activity	BP	972	1	0.493731
GO:0007399	nervous system development	BP	2375	2	0.49478
GO:0051050	positive regulation of transport	BP	982	1	0.497352
GO:0007417	central nervous system development	BP	1002	1	0.504522
GO:0032880	regulation of protein localization	BP	1014	1	0.508778
GO:0000278	mitotic cell cycle	BP	1017	1	0.509837
GO:0030234	enzyme regulator activity	MF	1032	1	0.515099
GO:0000902	cell morphogenesis	BP	1034	1	0.515796
GO:0044429	mitochondrial part	CC	1036	1	0.516493
GO:0007167	enzyme linked receptor protein signaling pathway	BP	1045	1	0.519616
GO:0051093	negative regulation of developmental process	BP	1046	1	0.519962
GO:0036094	small molecule binding	MF	2503	2	0.524361
GO:0044255	cellular lipid metabolic process	BP	1071	1	0.528535
GO:0019752	carboxylic acid metabolic process	BP	1083	1	0.532599
GO:0040012	regulation of locomotion	BP	1084	1	0.532936
GO:0032269	negative regulation of cellular protein metabolic process	BP	1119	1	0.544598
GO:0032989	cellular component morphogenesis	BP	1143	1	0.552437
GO:0022603	regulation of anatomical structure morphogenesis	BP	1155	1	0.556309
GO:0044092	negative regulation of molecular function	BP	1162	1	0.558554
GO:0072359	circulatory system development	BP	1169	1	0.560788
GO:0043436	oxoacid metabolic process	BP	1172	1	0.561742
GO:0006464	cellular protein modification process	BP	4160	3	0.563368
GO:0036211	protein modification process	BP	4160	3	0.563368
GO:0032268	regulation of cellular protein metabolic process	BP	2679	2	0.563396
GO:0031967	organelle envelope	CC	1182	1	0.564909
GO:0031975	envelope	CC	1182	1	0.564909
GO:0051248	negative regulation of protein metabolic process	BP	1188	1	0.566799
GO:0050793	regulation of developmental process	BP	2696	2	0.567062
GO:0006082	organic acid metabolic process	BP	1192	1	0.568055
GO:0046872	metal ion binding	MF	4189	3	0.568604
GO:0051726	regulation of cell cycle	BP	1213	1	0.574592
GO:0005575	cellular_component	CC	19717	14	0.584389
GO:0043169	cation binding	MF	4279	3	0.58466
GO:0071702	organic substance transport	BP	2791	2	0.587196
GO:0032879	regulation of localization	BP	2853	2	0.600013
GO:0030054	cell junction	CC	1298	1	0.600124
GO:0043412	macromolecule modification	BP	4373	3	0.601106
GO:0051241	negative regulation of multicellular organismal process	BP	1316	1	0.605345
GO:0051641	cellular localization	BP	2927	2	0.61497
GO:0051246	regulation of protein metabolic process	BP	2936	2	0.616763
GO:0030182	neuron differentiation	BP	1365	1	0.619239
GO:0019538	protein metabolic process	BP	5986	4	0.620594
GO:0007186	G protein-coupled receptor signaling pathway	BP	1371	1	0.620909
GO:0065009	regulation of molecular function	BP	2989	2	0.627213
GO:0022402	cell cycle process	BP	1394	1	0.627246
GO:0006629	lipid metabolic process	BP	1407	1	0.630785
GO:0022414	reproductive process	BP	1429	1	0.636702
GO:0000003	reproduction	BP	1432	1	0.637502
GO:0050877	nervous system process	BP	1437	1	0.638832
GO:0043170	macromolecule metabolic process	BP	10507	7	0.641896
GO:0044463	cell projection part	CC	1467	1	0.646716
GO:0120038	plasma membrane bounded cell projection part	CC	1467	1	0.646716
GO:0005524	ATP binding	MF	1473	1	0.648273
GO:1990904	ribonucleoprotein complex	CC	1478	1	0.649566
GO:0033036	macromolecule localization	BP	3116	2	0.651469
GO:0048699	generation of neurons	BP	1524	1	0.661257
GO:0032559	adenyl ribonucleotide binding	MF	1531	1	0.663004
GO:0030030	cell projection organization	BP	1534	1	0.66375
GO:0030554	adenyl nucleotide binding	MF	1542	1	0.665732
GO:0051173	positive regulation of nitrogen compound metabolic process	BP	3200	2	0.6669
GO:0043232	intracellular non-membrane-bounded organelle	CC	4784	3	0.668807
GO:0043228	non-membrane-bounded organelle	CC	4793	3	0.670209
GO:0051239	regulation of multicellular organismal process	BP	3260	2	0.677625
GO:0022008	neurogenesis	BP	1623	1	0.6852
GO:0005102	signaling receptor binding	MF	1624	1	0.685433
GO:0048523	negative regulation of cellular process	BP	4903	3	0.687052
GO:0031325	positive regulation of cellular metabolic process	BP	3330	2	0.689823
GO:0044430	cytoskeletal part	CC	1688	1	0.700054
GO:0031984	organelle subcompartment	CC	1711	1	0.705153
GO:0010467	gene expression	BP	6585	4	0.707131
GO:0098772	molecular function regulator	MF	1810	1	0.726193
GO:0035639	purine ribonucleoside triphosphate binding	MF	1813	1	0.726808
GO:0007049	cell cycle	BP	1854	1	0.735089
GO:0034613	cellular protein localization	BP	1872	1	0.738651
GO:0032555	purine ribonucleotide binding	MF	1878	1	0.739828
GO:0044267	cellular protein metabolic process	BP	5276	3	0.740085
GO:0070727	cellular macromolecule localization	BP	1883	1	0.740805
GO:0017076	purine nucleotide binding	MF	1891	1	0.742362
GO:0032553	ribonucleotide binding	MF	1894	1	0.742943
GO:0044238	primary metabolic process	BP	11287	7	0.743684
GO:0044237	cellular metabolic process	BP	11301	7	0.745373
GO:0015031	protein transport	BP	1998	1	0.762363
GO:0010628	positive regulation of gene expression	BP	2012	1	0.76487
GO:0015833	peptide transport	BP	2034	1	0.768761
GO:0042886	amide transport	BP	2065	1	0.774142
GO:0006996	organelle organization	BP	3885	2	0.774858
GO:0034641	cellular nitrogen compound metabolic process	BP	7161	4	0.778484
GO:0045184	establishment of protein localization	BP	2113	1	0.782246
GO:0044281	small molecule metabolic process	BP	2115	1	0.782577
GO:0000166	nucleotide binding	MF	2125	1	0.784229
GO:1901265	nucleoside phosphate binding	MF	2126	1	0.784393
GO:2000026	regulation of multicellular organismal development	BP	2157	1	0.789435
GO:0019222	regulation of metabolic process	BP	7303	4	0.794178
GO:0048519	negative regulation of biological process	BP	5869	3	0.811305
GO:0071705	nitrogen compound transport	BP	2374	1	0.821781
GO:0031326	regulation of cellular biosynthetic process	BP	4325	2	0.828438
GO:0051171	regulation of nitrogen compound metabolic process	BP	6063	3	0.831198
GO:0019438	aromatic compound biosynthetic process	BP	4351	2	0.831253
GO:0051172	negative regulation of nitrogen compound metabolic process	BP	2488	1	0.836862
GO:0009889	regulation of biosynthetic process	BP	4404	2	0.836874
GO:0003677	DNA binding	MF	2518	1	0.840629
GO:1901362	organic cyclic compound biosynthetic process	BP	4500	2	0.846669
GO:0080090	regulation of primary metabolic process	BP	6233	3	0.847311
GO:1901363	heterocyclic compound binding	MF	6241	3	0.84804
GO:1901576	organic substance biosynthetic process	BP	6259	3	0.84967
GO:0031323	regulation of cellular metabolic process	BP	6305	3	0.853775
GO:0097159	organic cyclic compound binding	MF	6328	3	0.855795
GO:0031324	negative regulation of cellular metabolic process	BP	2650	1	0.856264
GO:0009058	biosynthetic process	BP	6339	3	0.856754
GO:0008104	protein localization	BP	2765	1	0.868712
GO:0006725	cellular aromatic compound metabolic process	BP	6615	3	0.879252
GO:0060255	regulation of macromolecule metabolic process	BP	6785	3	0.891677
GO:0044271	cellular nitrogen compound biosynthetic process	BP	5029	2	0.89239
GO:1901360	organic cyclic compound metabolic process	BP	6839	3	0.895406
GO:0009059	macromolecule biosynthetic process	BP	5114	2	0.898547
GO:0010468	regulation of gene expression	BP	5127	2	0.899462
GO:0010605	negative regulation of macromolecule metabolic process	BP	3314	1	0.915504
GO:0006355	regulation of transcription, DNA-templated	BP	3506	1	0.927814
GO:0009892	negative regulation of metabolic process	BP	3549	1	0.930332
GO:1903506	regulation of nucleic acid-templated transcription	BP	3567	1	0.931362
GO:2001141	regulation of RNA biosynthetic process	BP	3576	1	0.931872
GO:0006351	transcription, DNA-templated	BP	3668	1	0.936883
GO:0097659	nucleic acid-templated transcription	BP	3716	1	0.939359
GO:0032774	RNA biosynthetic process	BP	3733	1	0.940214
GO:0051252	regulation of RNA metabolic process	BP	3822	1	0.944512
GO:0005634	nucleus	CC	7932	3	0.951393
GO:2000112	regulation of cellular macromolecule biosynthetic process	BP	3998	1	0.952178
GO:0044249	cellular biosynthetic process	BP	6168	2	0.953368
GO:0010556	regulation of macromolecule biosynthetic process	BP	4138	1	0.957561
GO:0019219	regulation of nucleobase-containing compound metabolic process	BP	4140	1	0.957634
GO:0034654	nucleobase-containing compound biosynthetic process	BP	4278	1	0.962377
GO:0018130	heterocycle biosynthetic process	BP	4341	1	0.964374
GO:0003676	nucleic acid binding	MF	4349	1	0.96462
GO:0044260	cellular macromolecule metabolic process	BP	8352	3	0.964864
GO:0034645	cellular macromolecule biosynthetic process	BP	4961	1	0.979412
GO:0005829	cytosol	CC	5085	1	0.981599
GO:0016070	RNA metabolic process	BP	5206	1	0.983523
GO:0090304	nucleic acid metabolic process	BP	5735	1	0.98994
GO:0006139	nucleobase-containing compound metabolic process	BP	6411	1	0.994785
GO:0046483	heterocycle metabolic process	BP	6570	1	0.995552
GO:0002576	platelet degranulation	BP	128	0	1
GO:0001867	complement activation, lectin pathway	BP	13	0	1
GO:0001868	regulation of complement activation, lectin pathway	BP	2	0	1
GO:0001869	negative regulation of complement activation, lectin pathway	BP	2	0	1
GO:0002673	regulation of acute inflammatory response	BP	159	0	1
GO:0002697	regulation of immune effector process	BP	458	0	1
GO:0002698	negative regulation of immune effector process	BP	120	0	1
GO:0002920	regulation of humoral immune response	BP	134	0	1
GO:0002921	negative regulation of humoral immune response	BP	12	0	1
GO:0006956	complement activation	BP	175	0	1
GO:0007264	small GTPase mediated signal transduction	BP	571	0	1
GO:0007597	blood coagulation, intrinsic pathway	BP	18	0	1
GO:0010629	negative regulation of gene expression	BP	2448	0	1
GO:0010955	negative regulation of protein processing	BP	41	0	1
GO:0030449	regulation of complement activation	BP	115	0	1
GO:0031348	negative regulation of defense response	BP	239	0	1
GO:0045824	negative regulation of innate immune response	BP	59	0	1
GO:0045916	negative regulation of complement activation	BP	8	0	1
GO:0048863	stem cell differentiation	BP	257	0	1
GO:0050727	regulation of inflammatory response	BP	485	0	1
GO:0050777	negative regulation of immune response	BP	150	0	1
GO:0051056	regulation of small GTPase mediated signal transduction	BP	338	0	1
GO:0070613	regulation of protein processing	BP	180	0	1
GO:0072376	protein activation cascade	BP	198	0	1
GO:0072378	blood coagulation, fibrin clot formation	BP	27	0	1
GO:1903317	regulation of protein maturation	BP	182	0	1
GO:1903318	negative regulation of protein maturation	BP	41	0	1
GO:2000257	regulation of protein activation cascade	BP	116	0	1
GO:2000258	negative regulation of protein activation cascade	BP	8	0	1
GO:0006805	xenobiotic metabolic process	BP	125	0	1
GO:0009410	response to xenobiotic stimulus	BP	292	0	1
GO:0071466	cellular response to xenobiotic stimulus	BP	180	0	1
GO:0006953	acute-phase response	BP	47	0	1
GO:0010669	epithelial structure maintenance	BP	29	0	1
GO:0019216	regulation of lipid metabolic process	BP	410	0	1
GO:0022600	digestive system process	BP	100	0	1
GO:0030277	maintenance of gastrointestinal epithelium	BP	21	0	1
GO:0006638	neutral lipid metabolic process	BP	130	0	1
GO:0006639	acylglycerol metabolic process	BP	129	0	1
GO:0006641	triglyceride metabolic process	BP	105	0	1
GO:0009894	regulation of catabolic process	BP	979	0	1
GO:0009896	positive regulation of catabolic process	BP	423	0	1
GO:0010896	regulation of triglyceride catabolic process	BP	12	0	1
GO:0010898	positive regulation of triglyceride catabolic process	BP	7	0	1
GO:0016042	lipid catabolic process	BP	333	0	1
GO:0019433	triglyceride catabolic process	BP	35	0	1
GO:0031329	regulation of cellular catabolic process	BP	871	0	1
GO:0031331	positive regulation of cellular catabolic process	BP	361	0	1
GO:0044242	cellular lipid catabolic process	BP	217	0	1
GO:0045834	positive regulation of lipid metabolic process	BP	146	0	1
GO:0046461	neutral lipid catabolic process	BP	43	0	1
GO:0046464	acylglycerol catabolic process	BP	43	0	1
GO:0046486	glycerolipid metabolic process	BP	414	0	1
GO:0046503	glycerolipid catabolic process	BP	64	0	1
GO:0050994	regulation of lipid catabolic process	BP	54	0	1
GO:0050996	positive regulation of lipid catabolic process	BP	24	0	1
GO:0090207	regulation of triglyceride metabolic process	BP	40	0	1
GO:0090208	positive regulation of triglyceride metabolic process	BP	21	0	1
GO:0001525	angiogenesis	BP	587	0	1
GO:0001568	blood vessel development	BP	761	0	1
GO:0001667	ameboidal-type cell migration	BP	461	0	1
GO:0001944	vasculature development	BP	792	0	1
GO:0010594	regulation of endothelial cell migration	BP	229	0	1
GO:0010595	positive regulation of endothelial cell migration	BP	128	0	1
GO:0010631	epithelial cell migration	BP	351	0	1
GO:0010632	regulation of epithelial cell migration	BP	291	0	1
GO:0010634	positive regulation of epithelial cell migration	BP	171	0	1
GO:0014812	muscle cell migration	BP	104	0	1
GO:0014909	smooth muscle cell migration	BP	91	0	1
GO:0022613	ribonucleoprotein complex biogenesis	BP	502	0	1
GO:0030334	regulation of cell migration	BP	950	0	1
GO:0030335	positive regulation of cell migration	BP	544	0	1
GO:0035239	tube morphogenesis	BP	920	0	1
GO:0042254	ribosome biogenesis	BP	297	0	1
GO:0042273	ribosomal large subunit biogenesis	BP	71	0	1
GO:0043542	endothelial cell migration	BP	273	0	1
GO:0048514	blood vessel morphogenesis	BP	681	0	1
GO:0048646	anatomical structure formation involved in morphogenesis	BP	1173	0	1
GO:0051270	regulation of cellular component movement	BP	1097	0	1
GO:0051272	positive regulation of cellular component movement	BP	585	0	1
GO:0072358	cardiovascular system development	BP	801	0	1
GO:0090130	tissue migration	BP	360	0	1
GO:0090132	epithelium migration	BP	354	0	1
GO:2000145	regulation of cell motility	BP	1012	0	1
GO:2000147	positive regulation of cell motility	BP	568	0	1
GO:0001101	response to acid chemical	BP	343	0	1
GO:0006473	protein acetylation	BP	204	0	1
GO:0006474	N-terminal protein amino acid acetylation	BP	17	0	1
GO:0006586	indolalkylamine metabolic process	BP	17	0	1
GO:0007623	circadian rhythm	BP	208	0	1
GO:0009309	amine biosynthetic process	BP	24	0	1
GO:0009648	photoperiodism	BP	25	0	1
GO:0030186	melatonin metabolic process	BP	2	0	1
GO:0030187	melatonin biosynthetic process	BP	2	0	1
GO:0031365	N-terminal protein amino acid modification	BP	29	0	1
GO:0034694	response to prostaglandin	BP	31	0	1
GO:0034695	response to prostaglandin E	BP	23	0	1
GO:0034754	cellular hormone metabolic process	BP	129	0	1
GO:0042401	cellular biogenic amine biosynthetic process	BP	23	0	1
GO:0042430	indole-containing compound metabolic process	BP	24	0	1
GO:0042435	indole-containing compound biosynthetic process	BP	5	0	1
GO:0042446	hormone biosynthetic process	BP	86	0	1
GO:0043543	protein acylation	BP	248	0	1
GO:0046219	indolalkylamine biosynthetic process	BP	5	0	1
GO:0046688	response to copper ion	BP	44	0	1
GO:0048511	rhythmic process	BP	295	0	1
GO:0051385	response to mineralocorticoid	BP	32	0	1
GO:0051412	response to corticosterone	BP	21	0	1
GO:0070542	response to fatty acid	BP	86	0	1
GO:0071320	cellular response to cAMP	BP	53	0	1
GO:0071407	cellular response to organic cyclic compound	BP	542	0	1
GO:1901654	response to ketone	BP	193	0	1
GO:0002181	cytoplasmic translation	BP	100	0	1
GO:0002182	cytoplasmic translational elongation	BP	11	0	1
GO:0006396	RNA processing	BP	1456	0	1
GO:0006399	tRNA metabolic process	BP	193	0	1
GO:0006400	tRNA modification	BP	86	0	1
GO:0006412	translation	BP	714	0	1
GO:0006414	translational elongation	BP	133	0	1
GO:0006417	regulation of translation	BP	424	0	1
GO:0006418	tRNA aminoacylation for protein translation	BP	45	0	1
GO:0006419	alanyl-tRNA aminoacylation	BP	3	0	1
GO:0006448	regulation of translational elongation	BP	19	0	1
GO:0006450	regulation of translational fidelity	BP	21	0	1
GO:0008033	tRNA processing	BP	130	0	1
GO:0009451	RNA modification	BP	163	0	1
GO:0010608	posttranscriptional regulation of gene expression	BP	1169	0	1
GO:0021549	cerebellum development	BP	102	0	1
GO:0021680	cerebellar Purkinje cell layer development	BP	25	0	1
GO:0021695	cerebellar cortex development	BP	47	0	1
GO:0022037	metencephalon development	BP	111	0	1
GO:0030902	hindbrain development	BP	152	0	1
GO:0034470	ncRNA processing	BP	384	0	1
GO:0034660	ncRNA metabolic process	BP	562	0	1
GO:0043038	amino acid activation	BP	49	0	1
GO:0043039	tRNA aminoacylation	BP	48	0	1
GO:0043523	regulation of neuron apoptotic process	BP	210	0	1
GO:0043524	negative regulation of neuron apoptotic process	BP	147	0	1
GO:0050885	neuromuscular process controlling balance	BP	52	0	1
GO:0050905	neuromuscular process	BP	107	0	1
GO:0051402	neuron apoptotic process	BP	239	0	1
GO:0106074	aminoacyl-tRNA metabolism involved in translational fidelity	BP	13	0	1
GO:0140018	regulation of cytoplasmic translational fidelity	BP	1	0	1
GO:1900247	regulation of cytoplasmic translational elongation	BP	11	0	1
GO:2000765	regulation of cytoplasmic translation	BP	29	0	1
GO:0002790	peptide secretion	BP	624	0	1
GO:0002791	regulation of peptide secretion	BP	500	0	1
GO:0002793	positive regulation of peptide secretion	BP	288	0	1
GO:0003012	muscle system process	BP	465	0	1
GO:0006812	cation transport	BP	1160	0	1
GO:0006936	muscle contraction	BP	360	0	1
GO:0006937	regulation of muscle contraction	BP	171	0	1
GO:0006939	smooth muscle contraction	BP	110	0	1
GO:0006940	regulation of smooth muscle contraction	BP	65	0	1
GO:0007162	negative regulation of cell adhesion	BP	289	0	1
GO:0007618	mating	BP	40	0	1
GO:0007620	copulation	BP	20	0	1
GO:0007626	locomotory behavior	BP	198	0	1
GO:0008652	cellular amino acid biosynthetic process	BP	83	0	1
GO:0009063	cellular amino acid catabolic process	BP	125	0	1
GO:0009306	protein secretion	BP	591	0	1
GO:0009448	gamma-aminobutyric acid metabolic process	BP	5	0	1
GO:0009449	gamma-aminobutyric acid biosynthetic process	BP	3	0	1
GO:0009450	gamma-aminobutyric acid catabolic process	BP	2	0	1
GO:0009914	hormone transport	BP	322	0	1
GO:0010039	response to iron ion	BP	33	0	1
GO:0010543	regulation of platelet activation	BP	31	0	1
GO:0010544	negative regulation of platelet activation	BP	19	0	1
GO:0014046	dopamine secretion	BP	40	0	1
GO:0014051	gamma-aminobutyric acid secretion	BP	9	0	1
GO:0014052	regulation of gamma-aminobutyric acid secretion	BP	6	0	1
GO:0014053	negative regulation of gamma-aminobutyric acid secretion	BP	1	0	1
GO:0014059	regulation of dopamine secretion	BP	40	0	1
GO:0015696	ammonium transport	BP	108	0	1
GO:0015718	monocarboxylic acid transport	BP	162	0	1
GO:0015740	C4-dicarboxylate transport	BP	23	0	1
GO:0015812	gamma-aminobutyric acid transport	BP	13	0	1
GO:0015837	amine transport	BP	102	0	1
GO:0015844	monoamine transport	BP	90	0	1
GO:0015850	organic hydroxy compound transport	BP	262	0	1
GO:0015872	dopamine transport	BP	52	0	1
GO:0016053	organic acid biosynthetic process	BP	463	0	1
GO:0016054	organic acid catabolic process	BP	275	0	1
GO:0019953	sexual reproduction	BP	848	0	1
GO:0022408	negative regulation of cell-cell adhesion	BP	181	0	1
GO:0023061	signal release	BP	462	0	1
GO:0030072	peptide hormone secretion	BP	250	0	1
GO:0030073	insulin secretion	BP	207	0	1
GO:0030193	regulation of blood coagulation	BP	79	0	1
GO:0030195	negative regulation of blood coagulation	BP	53	0	1
GO:0031644	regulation of neurological system process	BP	137	0	1
GO:0031646	positive regulation of neurological system process	BP	63	0	1
GO:0031649	heat generation	BP	17	0	1
GO:0031650	regulation of heat generation	BP	13	0	1
GO:0031652	positive regulation of heat generation	BP	11	0	1
GO:0032024	positive regulation of insulin secretion	BP	72	0	1
GO:0032787	monocarboxylic acid metabolic process	BP	651	0	1
GO:0032890	regulation of organic acid transport	BP	59	0	1
GO:0032891	negative regulation of organic acid transport	BP	21	0	1
GO:0032892	positive regulation of organic acid transport	BP	34	0	1
GO:0033240	positive regulation of cellular amine metabolic process	BP	9	0	1
GO:0033602	negative regulation of dopamine secretion	BP	3	0	1
GO:0033604	negative regulation of catecholamine secretion	BP	15	0	1
GO:0034110	regulation of homotypic cell-cell adhesion	BP	25	0	1
GO:0034111	negative regulation of homotypic cell-cell adhesion	BP	15	0	1
GO:0035640	exploration behavior	BP	26	0	1
GO:0042053	regulation of dopamine metabolic process	BP	20	0	1
GO:0042069	regulation of catecholamine metabolic process	BP	20	0	1
GO:0042136	neurotransmitter biosynthetic process	BP	106	0	1
GO:0042220	response to cocaine	BP	55	0	1
GO:0042391	regulation of membrane potential	BP	434	0	1
GO:0043269	regulation of ion transport	BP	699	0	1
GO:0043270	positive regulation of ion transport	BP	275	0	1
GO:0043271	negative regulation of ion transport	BP	157	0	1
GO:0043279	response to alkaloid	BP	112	0	1
GO:0044057	regulation of system process	BP	613	0	1
GO:0044070	regulation of anion transport	BP	95	0	1
GO:0044282	small molecule catabolic process	BP	445	0	1
GO:0044283	small molecule biosynthetic process	BP	807	0	1
GO:0044703	multi-organism reproductive process	BP	1016	0	1
GO:0045776	negative regulation of blood pressure	BP	46	0	1
GO:0045915	positive regulation of catecholamine metabolic process	BP	6	0	1
GO:0045933	positive regulation of muscle contraction	BP	48	0	1
GO:0045964	positive regulation of dopamine metabolic process	BP	6	0	1
GO:0045987	positive regulation of smooth muscle contraction	BP	32	0	1
GO:0046394	carboxylic acid biosynthetic process	BP	462	0	1
GO:0046395	carboxylic acid catabolic process	BP	275	0	1
GO:0046717	acid secretion	BP	124	0	1
GO:0046879	hormone secretion	BP	312	0	1
GO:0046883	regulation of hormone secretion	BP	266	0	1
GO:0046887	positive regulation of hormone secretion	BP	131	0	1
GO:0048148	behavioral response to cocaine	BP	20	0	1
GO:0050432	catecholamine secretion	BP	64	0	1
GO:0050433	regulation of catecholamine secretion	BP	62	0	1
GO:0050708	regulation of protein secretion	BP	472	0	1
GO:0050714	positive regulation of protein secretion	BP	268	0	1
GO:0050796	regulation of insulin secretion	BP	176	0	1
GO:0050806	positive regulation of synaptic transmission	BP	168	0	1
GO:0050818	regulation of coagulation	BP	84	0	1
GO:0050819	negative regulation of coagulation	BP	57	0	1
GO:0050866	negative regulation of cell activation	BP	199	0	1
GO:0051048	negative regulation of secretion	BP	238	0	1
GO:0051051	negative regulation of transport	BP	522	0	1
GO:0051222	positive regulation of protein transport	BP	418	0	1
GO:0051588	regulation of neurotransmitter transport	BP	139	0	1
GO:0051589	negative regulation of neurotransmitter transport	BP	23	0	1
GO:0051937	catecholamine transport	BP	77	0	1
GO:0051952	regulation of amine transport	BP	95	0	1
GO:0051953	negative regulation of amine transport	BP	27	0	1
GO:0051954	positive regulation of amine transport	BP	35	0	1
GO:0051955	regulation of amino acid transport	BP	33	0	1
GO:0051956	negative regulation of amino acid transport	BP	12	0	1
GO:0051957	positive regulation of amino acid transport	BP	18	0	1
GO:0060078	regulation of postsynaptic membrane potential	BP	140	0	1
GO:0060080	inhibitory postsynaptic potential	BP	17	0	1
GO:0060359	response to ammonium ion	BP	135	0	1
GO:0061041	regulation of wound healing	BP	148	0	1
GO:0061045	negative regulation of wound healing	BP	76	0	1
GO:0061528	aspartate secretion	BP	1	0	1
GO:0070459	prolactin secretion	BP	8	0	1
GO:0070471	uterine smooth muscle contraction	BP	11	0	1
GO:0070472	regulation of uterine smooth muscle contraction	BP	10	0	1
GO:0070474	positive regulation of uterine smooth muscle contraction	BP	7	0	1
GO:0072329	monocarboxylic acid catabolic process	BP	132	0	1
GO:0072330	monocarboxylic acid biosynthetic process	BP	343	0	1
GO:0072347	response to anesthetic	BP	78	0	1
GO:0090257	regulation of muscle system process	BP	259	0	1
GO:0090276	regulation of peptide hormone secretion	BP	208	0	1
GO:0090277	positive regulation of peptide hormone secretion	BP	96	0	1
GO:0090330	regulation of platelet aggregation	BP	18	0	1
GO:0090331	negative regulation of platelet aggregation	BP	12	0	1
GO:0097151	positive regulation of inhibitory postsynaptic potential	BP	7	0	1
GO:0098828	modulation of inhibitory postsynaptic potential	BP	7	0	1
GO:0099565	chemical synaptic transmission, postsynaptic	BP	108	0	1
GO:1900046	regulation of hemostasis	BP	80	0	1
GO:1900047	negative regulation of hemostasis	BP	54	0	1
GO:1902722	positive regulation of prolactin secretion	BP	3	0	1
GO:1903034	regulation of response to wounding	BP	179	0	1
GO:1903035	negative regulation of response to wounding	BP	90	0	1
GO:1903531	negative regulation of secretion by cell	BP	211	0	1
GO:1903792	negative regulation of anion transport	BP	28	0	1
GO:1903793	positive regulation of anion transport	BP	50	0	1
GO:1904448	regulation of aspartate secretion	BP	1	0	1
GO:1904450	positive regulation of aspartate secretion	BP	1	0	1
GO:1904951	positive regulation of establishment of protein localization	BP	456	0	1
GO:2001023	regulation of response to drug	BP	100	0	1
GO:2001024	negative regulation of response to drug	BP	33	0	1
GO:0006066	alcohol metabolic process	BP	364	0	1
GO:0006497	protein lipidation	BP	89	0	1
GO:0006909	phagocytosis	BP	369	0	1
GO:0006911	phagocytosis, engulfment	BP	118	0	1
GO:0007033	vacuole organization	BP	163	0	1
GO:0007040	lysosome organization	BP	61	0	1
GO:0007187	G protein-coupled receptor signaling pathway, coupled to cyclic nucleotide second messenger	BP	256	0	1
GO:0007188	adenylate cyclase-modulating G protein-coupled receptor signaling pathway	BP	221	0	1
GO:0007189	adenylate cyclase-activating G protein-coupled receptor signaling pathway	BP	139	0	1
GO:0007265	Ras protein signal transduction	BP	448	0	1
GO:0007266	Rho protein signal transduction	BP	203	0	1
GO:0008202	steroid metabolic process	BP	331	0	1
GO:0008203	cholesterol metabolic process	BP	150	0	1
GO:0010324	membrane invagination	BP	135	0	1
GO:0010742	macrophage derived foam cell differentiation	BP	36	0	1
GO:0010743	regulation of macrophage derived foam cell differentiation	BP	30	0	1
GO:0010745	negative regulation of macrophage derived foam cell differentiation	BP	13	0	1
GO:0010874	regulation of cholesterol efflux	BP	39	0	1
GO:0010875	positive regulation of cholesterol efflux	BP	16	0	1
GO:0010878	cholesterol storage	BP	18	0	1
GO:0010883	regulation of lipid storage	BP	46	0	1
GO:0010885	regulation of cholesterol storage	BP	16	0	1
GO:0010887	negative regulation of cholesterol storage	BP	8	0	1
GO:0010888	negative regulation of lipid storage	BP	19	0	1
GO:0015748	organophosphate ester transport	BP	105	0	1
GO:0015914	phospholipid transport	BP	75	0	1
GO:0015918	sterol transport	BP	112	0	1
GO:0016125	sterol metabolic process	BP	166	0	1
GO:0016197	endosomal transport	BP	224	0	1
GO:0019915	lipid storage	BP	68	0	1
GO:0019933	cAMP-mediated signaling	BP	187	0	1
GO:0019935	cyclic-nucleotide-mediated signaling	BP	215	0	1
GO:0030301	cholesterol transport	BP	100	0	1
GO:0031334	positive regulation of protein complex assembly	BP	268	0	1
GO:0032365	intracellular lipid transport	BP	43	0	1
GO:0032366	intracellular sterol transport	BP	26	0	1
GO:0032367	intracellular cholesterol transport	BP	26	0	1
GO:0032368	regulation of lipid transport	BP	127	0	1
GO:0032370	positive regulation of lipid transport	BP	61	0	1
GO:0032371	regulation of sterol transport	BP	63	0	1
GO:0032373	positive regulation of sterol transport	BP	23	0	1
GO:0032374	regulation of cholesterol transport	BP	63	0	1
GO:0032376	positive regulation of cholesterol transport	BP	23	0	1
GO:0032488	Cdc42 protein signal transduction	BP	13	0	1
GO:0032489	regulation of Cdc42 protein signal transduction	BP	7	0	1
GO:0032526	response to retinoic acid	BP	108	0	1
GO:0032611	interleukin-1 beta production	BP	101	0	1
GO:0032612	interleukin-1 production	BP	115	0	1
GO:0033344	cholesterol efflux	BP	57	0	1
GO:0033363	secretory granule organization	BP	35	0	1
GO:0033700	phospholipid efflux	BP	12	0	1
GO:0034204	lipid translocation	BP	26	0	1
GO:0034377	plasma lipoprotein particle assembly	BP	28	0	1
GO:0034380	high-density lipoprotein particle assembly	BP	15	0	1
GO:0034405	response to fluid shear stress	BP	37	0	1
GO:0034616	response to laminar fluid shear stress	BP	15	0	1
GO:0035023	regulation of Rho protein signal transduction	BP	140	0	1
GO:0036314	response to sterol	BP	33	0	1
GO:0036315	cellular response to sterol	BP	24	0	1
GO:0038027	apolipoprotein A-I-mediated signaling pathway	BP	8	0	1
GO:0042157	lipoprotein metabolic process	BP	130	0	1
GO:0042158	lipoprotein biosynthetic process	BP	94	0	1
GO:0042632	cholesterol homeostasis	BP	96	0	1
GO:0043254	regulation of protein complex assembly	BP	467	0	1
GO:0043691	reverse cholesterol transport	BP	20	0	1
GO:0045332	phospholipid translocation	BP	25	0	1
GO:0046578	regulation of Ras protein signal transduction	BP	238	0	1
GO:0046907	intracellular transport	BP	1847	0	1
GO:0050663	cytokine secretion	BP	240	0	1
GO:0050701	interleukin-1 secretion	BP	61	0	1
GO:0050702	interleukin-1 beta secretion	BP	53	0	1
GO:0051649	establishment of localization in cell	BP	2242	0	1
GO:0055088	lipid homeostasis	BP	151	0	1
GO:0055091	phospholipid homeostasis	BP	11	0	1
GO:0055092	sterol homeostasis	BP	97	0	1
GO:0055094	response to lipoprotein particle	BP	32	0	1
GO:0060155	platelet dense granule organization	BP	8	0	1
GO:0065005	protein-lipid complex assembly	BP	32	0	1
GO:0070723	response to cholesterol	BP	29	0	1
GO:0071229	cellular response to acid chemical	BP	209	0	1
GO:0071300	cellular response to retinoic acid	BP	69	0	1
GO:0071397	cellular response to cholesterol	BP	20	0	1
GO:0071402	cellular response to lipoprotein particle stimulus	BP	34	0	1
GO:0071404	cellular response to low-density lipoprotein particle stimulus	BP	22	0	1
GO:0071825	protein-lipid complex subunit organization	BP	49	0	1
GO:0071827	plasma lipoprotein particle organization	BP	45	0	1
GO:0080171	lytic vacuole organization	BP	61	0	1
GO:0090077	foam cell differentiation	BP	36	0	1
GO:0090107	regulation of high-density lipoprotein particle assembly	BP	3	0	1
GO:0090108	positive regulation of high-density lipoprotein particle assembly	BP	1	0	1
GO:0097006	regulation of plasma lipoprotein particle levels	BP	101	0	1
GO:0097035	regulation of membrane lipid distribution	BP	50	0	1
GO:0097306	cellular response to alcohol	BP	89	0	1
GO:0099024	plasma membrane invagination	BP	127	0	1
GO:1902652	secondary alcohol metabolic process	BP	155	0	1
GO:1905952	regulation of lipid localization	BP	157	0	1
GO:1905953	negative regulation of lipid localization	BP	61	0	1
GO:1905954	positive regulation of lipid localization	BP	82	0	1
GO:0006357	regulation of transcription by RNA polymerase II	BP	2683	0	1
GO:0006366	transcription by RNA polymerase II	BP	2818	0	1
GO:0032377	regulation of intracellular lipid transport	BP	11	0	1
GO:0032380	regulation of intracellular sterol transport	BP	11	0	1
GO:0032383	regulation of intracellular cholesterol transport	BP	11	0	1
GO:0032386	regulation of intracellular transport	BP	423	0	1
GO:0015886	heme transport	BP	8	0	1
GO:0006649	phospholipid transfer to membrane	BP	2	0	1
GO:0007600	sensory perception	BP	977	0	1
GO:0007601	visual perception	BP	218	0	1
GO:0007602	phototransduction	BP	59	0	1
GO:0007603	phototransduction, visible light	BP	34	0	1
GO:0009581	detection of external stimulus	BP	133	0	1
GO:0009582	detection of abiotic stimulus	BP	136	0	1
GO:0009583	detection of light stimulus	BP	74	0	1
GO:0009584	detection of visible light	BP	62	0	1
GO:0045494	photoreceptor cell maintenance	BP	38	0	1
GO:0050953	sensory perception of light stimulus	BP	222	0	1
GO:0051606	detection of stimulus	BP	691	0	1
GO:0000226	microtubule cytoskeleton organization	BP	547	0	1
GO:0001558	regulation of cell growth	BP	416	0	1
GO:0001569	branching involved in blood vessel morphogenesis	BP	32	0	1
GO:0001736	establishment of planar polarity	BP	124	0	1
GO:0001738	morphogenesis of a polarized epithelium	BP	141	0	1
GO:0001763	morphogenesis of a branching structure	BP	196	0	1
GO:0001782	B cell homeostasis	BP	30	0	1
GO:0001819	positive regulation of cytokine production	BP	464	0	1
GO:0001838	embryonic epithelial tube formation	BP	124	0	1
GO:0001841	neural tube formation	BP	105	0	1
GO:0001843	neural tube closure	BP	90	0	1
GO:0001922	B-1 B cell homeostasis	BP	4	0	1
GO:0001933	negative regulation of protein phosphorylation	BP	429	0	1
GO:0001952	regulation of cell-matrix adhesion	BP	119	0	1
GO:0001954	positive regulation of cell-matrix adhesion	BP	51	0	1
GO:0002009	morphogenesis of an epithelium	BP	537	0	1
GO:0002040	sprouting angiogenesis	BP	183	0	1
GO:0002042	cell migration involved in sprouting angiogenesis	BP	98	0	1
GO:0002065	columnar/cuboidal epithelial cell differentiation	BP	112	0	1
GO:0002244	hematopoietic progenitor cell differentiation	BP	166	0	1
GO:0002260	lymphocyte homeostasis	BP	62	0	1
GO:0002285	lymphocyte activation involved in immune response	BP	181	0	1
GO:0002312	B cell activation involved in immune response	BP	73	0	1
GO:0002322	B cell proliferation involved in immune response	BP	6	0	1
GO:0002327	immature B cell differentiation	BP	9	0	1
GO:0002332	transitional stage B cell differentiation	BP	1	0	1
GO:0002333	transitional one stage B cell differentiation	BP	1	0	1
GO:0002429	immune response-activating cell surface receptor signaling pathway	BP	473	0	1
GO:0002431	Fc receptor mediated stimulatory signaling pathway	BP	145	0	1
GO:0002433	immune response-regulating cell surface receptor signaling pathway involved in phagocytosis	BP	139	0	1
GO:0006259	DNA metabolic process	BP	1026	0	1
GO:0006281	DNA repair	BP	552	0	1
GO:0006298	mismatch repair	BP	38	0	1
GO:0006469	negative regulation of protein kinase activity	BP	235	0	1
GO:0006816	calcium ion transport	BP	434	0	1
GO:0006874	cellular calcium ion homeostasis	BP	458	0	1
GO:0006914	autophagy	BP	496	0	1
GO:0006974	cellular response to DNA damage stimulus	BP	854	0	1
GO:0006975	DNA damage induced protein phosphorylation	BP	8	0	1
GO:0007010	cytoskeleton organization	BP	1330	0	1
GO:0007015	actin filament organization	BP	400	0	1
GO:0007017	microtubule-based process	BP	748	0	1
GO:0007044	cell-substrate junction assembly	BP	97	0	1
GO:0007045	cell-substrate adherens junction assembly	BP	81	0	1
GO:0007050	cell cycle arrest	BP	237	0	1
GO:0007164	establishment of tissue polarity	BP	124	0	1
GO:0007173	epidermal growth factor receptor signaling pathway	BP	119	0	1
GO:0007204	positive regulation of cytosolic calcium ion concentration	BP	319	0	1
GO:0007409	axonogenesis	BP	468	0	1
GO:0007569	cell aging	BP	116	0	1
GO:0008361	regulation of cell size	BP	179	0	1
GO:0008630	intrinsic apoptotic signaling pathway in response to DNA damage	BP	104	0	1
GO:0009790	embryo development	BP	1017	0	1
GO:0009791	post-embryonic development	BP	88	0	1
GO:0009792	embryo development ending in birth or egg hatching	BP	644	0	1
GO:0009891	positive regulation of biosynthetic process	BP	2025	0	1
GO:0010001	glial cell differentiation	BP	218	0	1
GO:0010506	regulation of autophagy	BP	327	0	1
GO:0010517	regulation of phospholipase activity	BP	70	0	1
GO:0010519	negative regulation of phospholipase activity	BP	8	0	1
GO:0010522	regulation of calcium ion transport into cytosol	BP	102	0	1
GO:0010524	positive regulation of calcium ion transport into cytosol	BP	54	0	1
GO:0010557	positive regulation of macromolecule biosynthetic process	BP	1880	0	1
GO:0010563	negative regulation of phosphorus metabolic process	BP	587	0	1
GO:0010942	positive regulation of cell death	BP	730	0	1
GO:0010959	regulation of metal ion transport	BP	394	0	1
GO:0010975	regulation of neuron projection development	BP	499	0	1
GO:0014020	primary neural tube formation	BP	97	0	1
GO:0016049	cell growth	BP	484	0	1
GO:0016331	morphogenesis of embryonic epithelium	BP	150	0	1
GO:0016567	protein ubiquitination	BP	822	0	1
GO:0018108	peptidyl-tyrosine phosphorylation	BP	363	0	1
GO:0018193	peptidyl-amino acid modification	BP	1259	0	1
GO:0018212	peptidyl-tyrosine modification	BP	366	0	1
GO:0021575	hindbrain morphogenesis	BP	41	0	1
GO:0021587	cerebellum morphogenesis	BP	37	0	1
GO:0021915	neural tube development	BP	160	0	1
GO:0030001	metal ion transport	BP	883	0	1
GO:0030029	actin filament-based process	BP	759	0	1
GO:0030031	cell projection assembly	BP	567	0	1
GO:0030035	microspike assembly	BP	4	0	1
GO:0030036	actin cytoskeleton organization	BP	666	0	1
GO:0030038	contractile actin filament bundle assembly	BP	98	0	1
GO:0030100	regulation of endocytosis	BP	281	0	1
GO:0030111	regulation of Wnt signaling pathway	BP	363	0	1
GO:0030177	positive regulation of Wnt signaling pathway	BP	179	0	1
GO:0030217	T cell differentiation	BP	240	0	1
GO:0030509	BMP signaling pathway	BP	157	0	1
GO:0030510	regulation of BMP signaling pathway	BP	91	0	1
GO:0030514	negative regulation of BMP signaling pathway	BP	52	0	1
GO:0030516	regulation of axon extension	BP	96	0	1
GO:0031032	actomyosin structure organization	BP	199	0	1
GO:0031109	microtubule polymerization or depolymerization	BP	112	0	1
GO:0031110	regulation of microtubule polymerization or depolymerization	BP	79	0	1
GO:0031113	regulation of microtubule polymerization	BP	50	0	1
GO:0031175	neuron projection development	BP	978	0	1
GO:0031328	positive regulation of cellular biosynthetic process	BP	1992	0	1
GO:0031396	regulation of protein ubiquitination	BP	204	0	1
GO:0031397	negative regulation of protein ubiquitination	BP	77	0	1
GO:0031400	negative regulation of protein modification process	BP	618	0	1
GO:0031532	actin cytoskeleton reorganization	BP	101	0	1
GO:0032092	positive regulation of protein binding	BP	93	0	1
GO:0032147	activation of protein kinase activity	BP	333	0	1
GO:0032231	regulation of actin filament bundle assembly	BP	97	0	1
GO:0032233	positive regulation of actin filament bundle assembly	BP	61	0	1
GO:0032271	regulation of protein polymerization	BP	218	0	1
GO:0032446	protein modification by small protein conjugation	BP	906	0	1
GO:0032535	regulation of cellular component size	BP	370	0	1
GO:0032609	interferon-gamma production	BP	113	0	1
GO:0032623	interleukin-2 production	BP	62	0	1
GO:0032649	regulation of interferon-gamma production	BP	101	0	1
GO:0032663	regulation of interleukin-2 production	BP	54	0	1
GO:0032729	positive regulation of interferon-gamma production	BP	65	0	1
GO:0032743	positive regulation of interleukin-2 production	BP	30	0	1
GO:0032886	regulation of microtubule-based process	BP	218	0	1
GO:0032956	regulation of actin cytoskeleton organization	BP	343	0	1
GO:0032970	regulation of actin filament-based process	BP	388	0	1
GO:0032990	cell part morphogenesis	BP	685	0	1
GO:0033673	negative regulation of kinase activity	BP	257	0	1
GO:0034329	cell junction assembly	BP	241	0	1
GO:0034330	cell junction organization	BP	290	0	1
GO:0034332	adherens junction organization	BP	142	0	1
GO:0034333	adherens junction assembly	BP	90	0	1
GO:0034622	cellular protein-containing complex assembly	BP	1175	0	1
GO:0034762	regulation of transmembrane transport	BP	568	0	1
GO:0034764	positive regulation of transmembrane transport	BP	204	0	1
GO:0034765	regulation of ion transmembrane transport	BP	483	0	1
GO:0034767	positive regulation of ion transmembrane transport	BP	156	0	1
GO:0035148	tube formation	BP	148	0	1
GO:0035567	non-canonical Wnt signaling pathway	BP	150	0	1
GO:0035791	platelet-derived growth factor receptor-beta signaling pathway	BP	14	0	1
GO:0038083	peptidyl-tyrosine autophosphorylation	BP	37	0	1
GO:0038094	Fc-gamma receptor signaling pathway	BP	142	0	1
GO:0038096	Fc-gamma receptor signaling pathway involved in phagocytosis	BP	139	0	1
GO:0038127	ERBB signaling pathway	BP	142	0	1
GO:0038189	neuropilin signaling pathway	BP	4	0	1
GO:0040007	growth	BP	986	0	1
GO:0040008	regulation of growth	BP	679	0	1
GO:0042063	gliogenesis	BP	290	0	1
GO:0042100	B cell proliferation	BP	95	0	1
GO:0042326	negative regulation of phosphorylation	BP	468	0	1
GO:0042770	signal transduction in response to DNA damage	BP	133	0	1
GO:0043009	chordate embryonic development	BP	627	0	1
GO:0043065	positive regulation of apoptotic process	BP	672	0	1
GO:0043068	positive regulation of programmed cell death	BP	680	0	1
GO:0043124	negative regulation of I-kappaB kinase/NF-kappaB signaling	BP	49	0	1
GO:0043149	stress fiber assembly	BP	98	0	1
GO:0043393	regulation of protein binding	BP	217	0	1
GO:0043409	negative regulation of MAPK cascade	BP	184	0	1
GO:0043534	blood vessel endothelial cell migration	BP	180	0	1
GO:0043535	regulation of blood vessel endothelial cell migration	BP	156	0	1
GO:0043536	positive regulation of blood vessel endothelial cell migration	BP	79	0	1
GO:0045580	regulation of T cell differentiation	BP	139	0	1
GO:0045619	regulation of lymphocyte differentiation	BP	169	0	1
GO:0045664	regulation of neuron differentiation	BP	656	0	1
GO:0045765	regulation of angiogenesis	BP	383	0	1
GO:0045766	positive regulation of angiogenesis	BP	204	0	1
GO:0045786	negative regulation of cell cycle	BP	641	0	1
GO:0045787	positive regulation of cell cycle	BP	389	0	1
GO:0045893	positive regulation of transcription, DNA-templated	BP	1535	0	1
GO:0045930	negative regulation of mitotic cell cycle	BP	338	0	1
GO:0045931	positive regulation of mitotic cell cycle	BP	163	0	1
GO:0045935	positive regulation of nucleobase-containing compound metabolic process	BP	1899	0	1
GO:0045936	negative regulation of phosphate metabolic process	BP	586	0	1
GO:0045944	positive regulation of transcription by RNA polymerase II	BP	1204	0	1
GO:0046631	alpha-beta T cell activation	BP	138	0	1
GO:0046632	alpha-beta T cell differentiation	BP	101	0	1
GO:0046777	protein autophosphorylation	BP	235	0	1
GO:0046785	microtubule polymerization	BP	76	0	1
GO:0048008	platelet-derived growth factor receptor signaling pathway	BP	57	0	1
GO:0048041	focal adhesion assembly	BP	81	0	1
GO:0048167	regulation of synaptic plasticity	BP	187	0	1
GO:0048536	spleen development	BP	33	0	1
GO:0048538	thymus development	BP	45	0	1
GO:0048588	developmental cell growth	BP	234	0	1
GO:0048589	developmental growth	BP	674	0	1
GO:0048598	embryonic morphogenesis	BP	586	0	1
GO:0048638	regulation of developmental growth	BP	347	0	1
GO:0048666	neuron development	BP	1110	0	1
GO:0048667	cell morphogenesis involved in neuron differentiation	BP	583	0	1
GO:0048668	collateral sprouting	BP	27	0	1
GO:0048675	axon extension	BP	121	0	1
GO:0048708	astrocyte differentiation	BP	81	0	1
GO:0048729	tissue morphogenesis	BP	670	0	1
GO:0048732	gland development	BP	434	0	1
GO:0048754	branching morphogenesis of an epithelial tube	BP	150	0	1
GO:0048812	neuron projection morphogenesis	BP	648	0	1
GO:0048858	cell projection morphogenesis	BP	666	0	1
GO:0050707	regulation of cytokine secretion	BP	210	0	1
GO:0050715	positive regulation of cytokine secretion	BP	139	0	1
GO:0050730	regulation of peptidyl-tyrosine phosphorylation	BP	256	0	1
GO:0050731	positive regulation of peptidyl-tyrosine phosphorylation	BP	192	0	1
GO:0050767	regulation of neurogenesis	BP	822	0	1
GO:0050770	regulation of axonogenesis	BP	183	0	1
GO:0050798	activated T cell proliferation	BP	41	0	1
GO:0050851	antigen receptor-mediated signaling pathway	BP	316	0	1
GO:0050852	T cell receptor signaling pathway	BP	202	0	1
GO:0050853	B cell receptor signaling pathway	BP	129	0	1
GO:0051017	actin filament bundle assembly	BP	153	0	1
GO:0051098	regulation of binding	BP	373	0	1
GO:0051099	positive regulation of binding	BP	179	0	1
GO:0051147	regulation of muscle cell differentiation	BP	181	0	1
GO:0051149	positive regulation of muscle cell differentiation	BP	109	0	1
GO:0051208	sequestering of calcium ion	BP	131	0	1
GO:0051209	release of sequestered calcium ion into cytosol	BP	124	0	1
GO:0051254	positive regulation of RNA metabolic process	BP	1706	0	1
GO:0051258	protein polymerization	BP	283	0	1
GO:0051276	chromosome organization	BP	1230	0	1
GO:0051279	regulation of release of sequestered calcium ion into cytosol	BP	82	0	1
GO:0051281	positive regulation of release of sequestered calcium ion into cytosol	BP	40	0	1
GO:0051282	regulation of sequestering of calcium ion	BP	128	0	1
GO:0051283	negative regulation of sequestering of calcium ion	BP	126	0	1
GO:0051341	regulation of oxidoreductase activity	BP	107	0	1
GO:0051348	negative regulation of transferase activity	BP	285	0	1
GO:0051353	positive regulation of oxidoreductase activity	BP	54	0	1
GO:0051438	regulation of ubiquitin-protein transferase activity	BP	52	0	1
GO:0051444	negative regulation of ubiquitin-protein transferase activity	BP	16	0	1
GO:0051480	regulation of cytosolic calcium ion concentration	BP	357	0	1
GO:0051492	regulation of stress fiber assembly	BP	84	0	1
GO:0051493	regulation of cytoskeleton organization	BP	533	0	1
GO:0051495	positive regulation of cytoskeleton organization	BP	226	0	1
GO:0051496	positive regulation of stress fiber assembly	BP	51	0	1
GO:0051881	regulation of mitochondrial membrane potential	BP	72	0	1
GO:0051882	mitochondrial depolarization	BP	23	0	1
GO:0051893	regulation of focal adhesion assembly	BP	60	0	1
GO:0051894	positive regulation of focal adhesion assembly	BP	25	0	1
GO:0051899	membrane depolarization	BP	91	0	1
GO:0051924	regulation of calcium ion transport	BP	254	0	1
GO:0051928	positive regulation of calcium ion transport	BP	123	0	1
GO:0051960	regulation of nervous system development	BP	927	0	1
GO:0055074	calcium ion homeostasis	BP	471	0	1
GO:0060020	Bergmann glial cell differentiation	BP	7	0	1
GO:0060071	Wnt signaling pathway, planar cell polarity pathway	BP	108	0	1
GO:0060191	regulation of lipase activity	BP	98	0	1
GO:0060192	negative regulation of lipase activity	BP	18	0	1
GO:0060218	hematopoietic stem cell differentiation	BP	83	0	1
GO:0060291	long-term synaptic potentiation	BP	86	0	1
GO:0060401	cytosolic calcium ion transport	BP	171	0	1
GO:0060402	calcium ion transport into cytosol	BP	158	0	1
GO:0060560	developmental growth involved in morphogenesis	BP	235	0	1
GO:0060562	epithelial tube morphogenesis	BP	322	0	1
GO:0060563	neuroepithelial cell differentiation	BP	53	0	1
GO:0060606	tube closure	BP	91	0	1
GO:0060688	regulation of morphogenesis of a branching structure	BP	56	0	1
GO:0061138	morphogenesis of a branching epithelium	BP	182	0	1
GO:0061387	regulation of extent of cell growth	BP	110	0	1
GO:0061564	axon development	BP	514	0	1
GO:0061572	actin filament bundle organization	BP	157	0	1
GO:0061919	process utilizing autophagic mechanism	BP	496	0	1
GO:0070371	ERK1 and ERK2 cascade	BP	317	0	1
GO:0070372	regulation of ERK1 and ERK2 cascade	BP	300	0	1
GO:0070373	negative regulation of ERK1 and ERK2 cascade	BP	74	0	1
GO:0070374	positive regulation of ERK1 and ERK2 cascade	BP	215	0	1
GO:0070507	regulation of microtubule cytoskeleton organization	BP	186	0	1
GO:0070588	calcium ion transmembrane transport	BP	315	0	1
GO:0070647	protein modification by small protein conjugation or removal	BP	1108	0	1
GO:0070838	divalent metal ion transport	BP	483	0	1
GO:0070970	interleukin-2 secretion	BP	9	0	1
GO:0071103	DNA conformation change	BP	327	0	1
[truncated: 20,912 more rows]

## Sheet: RNASeq_PC2_CM-UM
																				Term_id	Term	Ont	N	DE	P.DE
																				GO:0035580	specific granule lumen	CC	62	7	2.69572e-13
																				GO:0043312	neutrophil degranulation	BP	485	11	6.52038e-13
																				GO:0002283	neutrophil activation involved in immune response	BP	488	11	6.97244e-13
																				GO:0042119	neutrophil activation	BP	498	11	8.69168e-13
																				GO:0002446	neutrophil mediated immunity	BP	499	11	8.88313e-13
																				GO:0036230	granulocyte activation	BP	504	11	9.89887e-13
																				GO:0043299	leukocyte degranulation	BP	534	11	1.85331e-12
																				GO:0002275	myeloid cell activation involved in immune response	BP	544	11	2.26583e-12
																				GO:0002444	myeloid leukocyte mediated immunity	BP	551	11	2.6022e-12
																				GO:0042581	specific granule	CC	160	8	3.3802e-12
																				GO:0030141	secretory granule	CC	833	12	8.38674e-12
																				GO:0002274	myeloid leukocyte activation	BP	651	11	1.57353e-11
																				GO:0006887	exocytosis	BP	903	12	2.15066e-11
																				GO:0002366	leukocyte activation involved in immune response	BP	707	11	3.81693e-11
																				GO:0002263	cell activation involved in immune response	BP	711	11	4.05487e-11
																				GO:0099503	secretory vesicle	CC	986	12	5.97877e-11
																				GO:0045055	regulated exocytosis	BP	794	11	1.32028e-10
																				GO:0002376	immune system process	BP	3193	17	2.17309e-10
																				GO:0002443	leukocyte mediated immunity	BP	874	11	3.66712e-10
																				GO:0006955	immune response	BP	2279	15	3.76173e-10
																				GO:0032940	secretion by cell	BP	1524	13	5.34965e-10
																				GO:0034774	secretory granule lumen	CC	321	8	8.79427e-10
																				GO:0045321	leukocyte activation	BP	1284	12	1.25425e-09
																				GO:0060205	cytoplasmic vesicle lumen	CC	338	8	1.32095e-09
																				GO:0031983	vesicle lumen	CC	339	8	1.35205e-09
																				GO:0046903	secretion	BP	1661	13	1.54916e-09
																				GO:1904724	tertiary granule lumen	CC	55	5	2.9431e-09
																				GO:0001775	cell activation	BP	1440	12	4.63427e-09
																				GO:0044433	cytoplasmic vesicle part	CC	1504	12	7.58747e-09
																				GO:0070820	tertiary granule	CC	164	6	1.6105e-08
																				GO:0002252	immune effector process	BP	1265	11	1.78538e-08
																				GO:0016192	vesicle-mediated transport	BP	2107	13	2.82638e-08
																				GO:0031410	cytoplasmic vesicle	CC	2314	13	8.73395e-08
																				GO:0097708	intracellular vesicle	CC	2317	13	8.87062e-08
																				GO:0043062	extracellular structure organization	BP	422	7	1.95396e-07
																				GO:0031982	vesicle	CC	3884	15	6.2778e-07
																				GO:0006952	defense response	BP	1797	11	6.50081e-07
																				GO:0050896	response to stimulus	BP	9324	21	8.13122e-07
																				GO:0030198	extracellular matrix organization	BP	368	6	1.88619e-06
																				GO:0007166	cell surface receptor signaling pathway	BP	3052	13	2.28961e-06
																				GO:0070062	extracellular exosome	CC	2163	11	4.12697e-06
																				GO:1903561	extracellular vesicle	CC	2186	11	4.58014e-06
																				GO:0043230	extracellular organelle	CC	2191	11	4.68429e-06
																				GO:0070887	cellular response to chemical stimulus	BP	3281	13	5.27287e-06
																				GO:0071345	cellular response to cytokine stimulus	BP	1118	8	1.23332e-05
																				GO:0005615	extracellular space	CC	3563	13	1.34838e-05
																				GO:0008131	primary amine oxidase activity	MF	6	2	1.64674e-05
																				GO:0009605	response to external stimulus	BP	2520	11	1.83043e-05
																				GO:0042133	neurotransmitter metabolic process	BP	153	4	1.96971e-05
																				GO:0006954	inflammatory response	BP	848	7	2.00616e-05
																				GO:0034097	response to cytokine	BP	1211	8	2.20766e-05
																				GO:0004252	serine-type endopeptidase activity	MF	160	4	2.34819e-05
																				GO:0051716	cellular response to stimulus	BP	7617	18	2.36111e-05
																				GO:1901700	response to oxygen-containing compound	BP	1637	9	2.47599e-05
																				GO:0044421	extracellular region part	CC	3763	13	2.49236e-05
																				GO:0051179	localization	BP	6735	17	2.50059e-05
																				GO:0012505	endomembrane system	CC	4441	14	2.64224e-05
																				GO:0006810	transport	BP	5190	15	2.89448e-05
																				GO:0008061	chitin binding	MF	8	2	3.06991e-05
																				GO:0071310	cellular response to organic substance	BP	2707	11	3.63419e-05
																				GO:0005576	extracellular region	CC	4586	14	3.88169e-05
																				GO:0008236	serine-type peptidase activity	MF	182	4	3.88869e-05
																				GO:0051234	establishment of localization	BP	5315	15	3.92792e-05
																				GO:0010033	response to organic substance	BP	3302	12	3.95431e-05
																				GO:0017171	serine hydrolase activity	MF	186	4	4.23309e-05
																				GO:0007165	signal transduction	BP	6155	16	4.46686e-05
																				GO:0042221	response to chemical	BP	4797	14	6.62085e-05
																				GO:0051851	modification by host of symbiont morphology or physiology	BP	77	3	7.4661e-05
																				GO:0022617	extracellular matrix disassembly	BP	80	3	8.36823e-05
																				GO:0051702	interaction with symbiont	BP	82	3	9.00755e-05
																				GO:0023052	signaling	BP	6620	16	0.000119879
																				GO:0048583	regulation of response to stimulus	BP	4342	13	0.000120696
																				GO:0007154	cell communication	BP	6647	16	0.000126609
																				GO:1901701	cellular response to oxygen-containing compound	BP	1136	7	0.000129174
																				GO:0016641	oxidoreductase activity, acting on the CH-NH2 group of donors, oxygen as acceptor	MF	16	2	0.000130884
																				GO:0019221	cytokine-mediated signaling pathway	BP	798	6	0.000149623
																				GO:2000379	positive regulation of reactive oxygen species metabolic process	BP	102	3	0.000172226
																				GO:0007229	integrin-mediated signaling pathway	BP	103	3	0.00017727
																				GO:1901652	response to peptide	BP	520	5	0.000190228
																				GO:0016638	oxidoreductase activity, acting on the CH-NH2 group of donors	MF	20	2	0.000206695
																				GO:0051817	modification of morphology or physiology of other organism involved in symbiotic interaction	BP	112	3	0.000227035
																				GO:0071356	cellular response to tumor necrosis factor	BP	291	4	0.000238308
																				GO:0009986	cell surface	CC	897	6	0.000282593
																				GO:0019730	antimicrobial humoral response	BP	122	3	0.000292055
																				GO:0034612	response to tumor necrosis factor	BP	312	4	0.000310712
																				GO:0033993	response to lipid	BP	923	6	0.000329661
																				GO:0006950	response to stress	BP	4110	12	0.000356761
																				GO:0032496	response to lipopolysaccharide	BP	330	4	0.000384361
																				GO:0009308	amine metabolic process	BP	138	3	0.000419225
																				GO:0044788	modulation by host of viral process	BP	29	2	0.000439097
																				GO:0002237	response to molecule of bacterial origin	BP	343	4	0.000444814
																				GO:0010243	response to organonitrogen compound	BP	998	6	0.000500925
																				GO:0001505	regulation of neurotransmitter levels	BP	354	4	0.00050105
																				GO:0008305	integrin complex	CC	31	2	0.000502253
																				GO:0005766	primary lysosome	CC	155	3	0.000588465
																				GO:0042582	azurophil granule	CC	155	3	0.000588465
																				GO:0098636	protein complex involved in cell adhesion	CC	34	2	0.000604763
																				GO:0005764	lysosome	CC	678	5	0.000644612
																				GO:0000323	lytic vacuole	CC	679	5	0.000648938
																				GO:0048584	positive regulation of response to stimulus	BP	2500	9	0.000660615
																				GO:0035821	modification of morphology or physiology of other organism	BP	164	3	0.000693437
																				GO:0009617	response to bacterium	BP	699	5	0.000740167
																				GO:1903532	positive regulation of secretion by cell	BP	399	4	0.000784875
																				GO:1901698	response to nitrogen compound	BP	1089	6	0.000795183
																				GO:0005775	vacuolar lumen	CC	172	3	0.000796195
																				GO:0050832	defense response to fungus	BP	40	2	0.000837574
																				GO:0150077	regulation of neuroinflammatory response	BP	41	2	0.000879954
																				GO:0071347	cellular response to interleukin-1	BP	179	3	0.000893676
																				GO:0004175	endopeptidase activity	MF	427	4	0.00101033
																				GO:0010562	positive regulation of phosphorus metabolic process	BP	1141	6	0.00101553
																				GO:0045937	positive regulation of phosphate metabolic process	BP	1141	6	0.00101553
																				GO:0051047	positive regulation of secretion	BP	428	4	0.00101915
																				GO:1903530	regulation of secretion by cell	BP	753	5	0.0010349
																				GO:0035987	endodermal cell differentiation	BP	45	2	0.00105963
																				GO:0070946	neutrophil mediated killing of gram-positive bacterium	BP	1	1	0.0010738
																				GO:0033214	iron assimilation by chelation and transport	BP	1	1	0.0010738
																				GO:1900159	positive regulation of bone mineralization involved in bone maturation	BP	1	1	0.0010738
																				GO:2000308	negative regulation of tumor necrosis factor (ligand) superfamily member 11 production	BP	1	1	0.0010738
																				GO:0060945	cardiac neuron differentiation	BP	1	1	0.0010738
																				GO:0050712	negative regulation of interleukin-1 alpha secretion	BP	1	1	0.0010738
																				GO:2000872	positive regulation of progesterone secretion	BP	1	1	0.0010738
																				GO:0034679	integrin alpha9-beta1 complex	CC	1	1	0.0010738
																				GO:0008843	endochitinase activity	MF	1	1	0.0010738
																				GO:0004398	histidine decarboxylase activity	MF	1	1	0.0010738
																				GO:0004617	phosphoglycerate dehydrogenase activity	MF	1	1	0.0010738
																				GO:0019731	antibacterial humoral response	BP	46	2	0.00110707
																				GO:2000377	regulation of reactive oxygen species metabolic process	BP	195	3	0.00114419
																				GO:0030574	collagen catabolic process	BP	47	2	0.00115552
																				GO:0005773	vacuole	CC	774	5	0.00117052
																				GO:0070741	response to interleukin-6	BP	50	2	0.0013069
																				GO:0001706	endoderm formation	BP	50	2	0.0013069
																				GO:0071222	cellular response to lipopolysaccharide	BP	205	3	0.0013212
																				GO:0048518	positive regulation of biological process	BP	6254	14	0.00135475
																				GO:0070555	response to interleukin-1	BP	207	3	0.00135855
																				GO:0009620	response to fungus	BP	52	2	0.00141282
																				GO:0048522	positive regulation of cellular process	BP	5490	13	0.00141386
																				GO:0051046	regulation of secretion	BP	811	5	0.00144124
																				GO:0071219	cellular response to molecule of bacterial origin	BP	212	3	0.00145484
																				GO:0006584	catecholamine metabolic process	BP	54	2	0.00152271
																				GO:0009712	catechol-containing compound metabolic process	BP	54	2	0.00152271
																				GO:1904645	response to amyloid-beta	BP	54	2	0.00152271
																				GO:0006576	cellular biogenic amine metabolic process	BP	55	2	0.00157915
																				GO:0017144	drug metabolic process	BP	851	5	0.00178366
																				GO:0050900	leukocyte migration	BP	499	4	0.00179454
																				GO:0043388	positive regulation of DNA binding	BP	59	2	0.00181475
																				GO:0000302	response to reactive oxygen species	BP	232	3	0.00188266
																				GO:0006879	cellular iron ion homeostasis	BP	61	2	0.00193845
																				GO:0045123	cellular extravasation	BP	61	2	0.00193845
																				GO:0034113	heterotypic cell-cell adhesion	BP	61	2	0.00193845
																				GO:0071216	cellular response to biotic stimulus	BP	236	3	0.00197667
																				GO:0031640	killing of cells of other organism	BP	62	2	0.00200176
																				GO:0044364	disruption of cells of other organism	BP	62	2	0.00200176
																				GO:0010646	regulation of cell communication	BP	3542	10	0.00201155
																				GO:0050663	cytokine secretion	BP	240	3	0.00207357
																				GO:2000870	regulation of progesterone secretion	BP	2	1	0.0021465
																				GO:0001694	histamine biosynthetic process	BP	2	1	0.0021465
																				GO:0140039	cell-cell adhesion in response to extracellular stimulus	BP	2	1	0.0021465
																				GO:0033212	iron assimilation	BP	2	1	0.0021465
																				GO:0042710	biofilm formation	BP	2	1	0.0021465
																				GO:0044010	single-species biofilm formation	BP	2	1	0.0021465
																				GO:0044407	single-species biofilm formation in or on host organism	BP	2	1	0.0021465
																				GO:1900190	regulation of single-species biofilm formation	BP	2	1	0.0021465
																				GO:1900191	negative regulation of single-species biofilm formation	BP	2	1	0.0021465
																				GO:1900228	regulation of single-species biofilm formation in or on host organism	BP	2	1	0.0021465
																				GO:1900229	negative regulation of single-species biofilm formation in or on host organism	BP	2	1	0.0021465
																				GO:0048627	myoblast development	BP	2	1	0.0021465
																				GO:0071065	alpha9-beta1 integrin-vascular cell adhesion molecule-1 complex	CC	2	1	0.0021465
																				GO:1903981	enterobactin binding	MF	2	1	0.0021465
																				GO:0004910	interleukin-1, type II, blocking receptor activity	MF	2	1	0.0021465
																				GO:0031012	extracellular matrix	CC	526	4	0.0021751
																				GO:0006026	aminoglycan catabolic process	BP	65	2	0.00219755
																				GO:0023051	regulation of signaling	BP	3591	10	0.00223935
																				GO:0005518	collagen binding	MF	67	2	0.00233292
																				GO:0010647	positive regulation of cell communication	BP	1844	7	0.00239966
																				GO:0023056	positive regulation of signaling	BP	1851	7	0.00245256
																				GO:0051049	regulation of transport	BP	1879	7	0.00267339
																				GO:0010035	response to inorganic substance	BP	562	4	0.00276535
																				GO:0044437	vacuolar part	CC	567	4	0.00285524
																				GO:0008284	positive regulation of cell proliferation	BP	951	5	0.00290077
																				GO:0150076	neuroinflammatory response	BP	75	2	0.00291286
																				GO:0032868	response to insulin	BP	272	3	0.00295655
																				GO:0007492	endoderm development	BP	76	2	0.00298965
																				GO:0065007	biological regulation	BP	12777	20	0.00301839
																				GO:1901224	positive regulation of NIK/NF-kappaB signaling	BP	77	2	0.00306738
																				GO:0022610	biological adhesion	BP	1427	6	0.00319551
																				GO:0005737	cytoplasm	CC	11625	19	0.00320127
																				GO:0072535	tumor necrosis factor (ligand) superfamily member 11 production	BP	3	1	0.0032181
																				GO:2000307	regulation of tumor necrosis factor (ligand) superfamily member 11 production	BP	3	1	0.0032181
																				GO:0019065	receptor-mediated endocytosis of virus by host cell	BP	3	1	0.0032181
																				GO:0075509	endocytosis involved in viral entry into host cell	BP	3	1	0.0032181
																				GO:0015688	iron chelate transport	BP	3	1	0.0032181
																				GO:0015891	siderophore transport	BP	3	1	0.0032181
																				GO:2000196	positive regulation of female gonad development	BP	3	1	0.0032181
																				GO:0032997	Fc receptor complex	CC	3	1	0.0032181
																				GO:0032998	Fc-epsilon receptor I complex	CC	3	1	0.0032181
																				GO:0055072	iron ion homeostasis	BP	79	2	0.00322568
																				GO:0098552	side of membrane	CC	587	4	0.00323504
																				GO:0072593	reactive oxygen species metabolic process	BP	284	3	0.00333903
																				GO:0070011	peptidase activity, acting on L-amino acid peptides	MF	599	4	0.00347888
																				GO:0006468	protein phosphorylation	BP	1983	7	0.00363326
																				GO:0050886	endocrine process	BP	84	2	0.00363788
																				GO:0001932	regulation of protein phosphorylation	BP	1465	6	0.0036446
																				GO:0009966	regulation of signal transduction	BP	3170	9	0.0036614
																				GO:0071396	cellular response to lipid	BP	610	4	0.00371324
																				GO:0001818	negative regulation of cytokine production	BP	296	3	0.00375068
																				GO:0051707	response to other organism	BP	1013	5	0.00381017
																				GO:0030667	secretory granule membrane	CC	298	3	0.00382217
																				GO:0043207	response to external biotic stimulus	BP	1015	5	0.00384258
																				GO:0001934	positive regulation of protein phosphorylation	BP	1017	5	0.00387519
																				GO:0045921	positive regulation of exocytosis	BP	88	2	0.00398443
																				GO:0050829	defense response to Gram-negative bacterium	BP	88	2	0.00398443
																				GO:0008233	peptidase activity	MF	623	4	0.0040039
																				GO:0035578	azurophil granule lumen	CC	91	2	0.00425406
																				GO:0070836	caveola assembly	BP	4	1	0.0042886
																				GO:0006030	chitin metabolic process	BP	4	1	0.0042886
																				GO:0006032	chitin catabolic process	BP	4	1	0.0042886
																				GO:1902732	positive regulation of chondrocyte proliferation	BP	4	1	0.0042886
																				GO:0070346	positive regulation of fat cell proliferation	BP	4	1	0.0042886
																				GO:0042701	progesterone secretion	BP	4	1	0.0042886
																				GO:0001692	histamine metabolic process	BP	4	1	0.0042886
																				GO:0043315	positive regulation of neutrophil degranulation	BP	4	1	0.0042886
																				GO:1902565	positive regulation of neutrophil activation	BP	4	1	0.0042886
																				GO:0050705	regulation of interleukin-1 alpha secretion	BP	4	1	0.0042886
																				GO:0032690	negative regulation of interleukin-1 alpha production	BP	4	1	0.0042886
																				GO:1903553	positive regulation of extracellular exosome assembly	BP	4	1	0.0042886
																				GO:0097013	phagocytic vesicle lumen	CC	4	1	0.0042886
																				GO:0004568	chitinase activity	MF	4	1	0.0042886
																				GO:0030060	L-malate dehydrogenase activity	MF	4	1	0.0042886
																				GO:2000117	negative regulation of cysteine-type endopeptidase activity	BP	92	2	0.00434577
																				GO:0044444	cytoplasmic part	CC	9735	17	0.00437771
																				GO:0009607	response to biotic stimulus	BP	1047	5	0.0043888
																				GO:0009888	tissue development	BP	2065	7	0.00456367
																				GO:1901564	organonitrogen compound metabolic process	BP	7040	14	0.00476239
																				GO:0042327	positive regulation of phosphorylation	BP	1068	5	0.00477648
																				GO:0046677	response to antibiotic	BP	327	3	0.004954
																				GO:0042742	defense response to bacterium	BP	330	3	0.00508145
																				GO:0009448	gamma-aminobutyric acid metabolic process	BP	5	1	0.005358
																				GO:0044789	modulation by host of viral release from host cell	BP	5	1	0.005358
																				GO:0044791	positive regulation by host of viral release from host cell	BP	5	1	0.005358
																				GO:0060161	positive regulation of dopamine receptor signaling pathway	BP	5	1	0.005358
																				GO:2000697	negative regulation of epithelial cell differentiation involved in kidney development	BP	5	1	0.005358
																				GO:0019732	antifungal humoral response	BP	5	1	0.005358
																				GO:2001205	negative regulation of osteoclast development	BP	5	1	0.005358
																				GO:0022614	membrane to membrane docking	BP	5	1	0.005358
																				GO:2000660	negative regulation of interleukin-1-mediated signaling pathway	BP	5	1	0.005358
																				GO:0050703	interleukin-1 alpha secretion	BP	5	1	0.005358
																				GO:0044218	other organism cell membrane	CC	5	1	0.005358
																				GO:0044279	other organism membrane	CC	5	1	0.005358
																				GO:0019863	IgE binding	MF	5	1	0.005358
																				GO:0018958	phenol-containing compound metabolic process	BP	103	2	0.00541475
																				GO:0004222	metalloendopeptidase activity	MF	103	2	0.00541475
																				GO:0098797	plasma membrane protein complex	CC	681	4	0.00549112
																				GO:0065008	regulation of biological quality	BP	4057	10	0.00567762
																				GO:0042136	neurotransmitter biosynthetic process	BP	106	2	0.00572522
																				GO:0050776	regulation of immune response	BP	1115	5	0.00573288
																				GO:0042325	regulation of phosphorylation	BP	1614	6	0.00587894
																				GO:0050789	regulation of biological process	BP	12093	19	0.00587897
																				GO:0046916	cellular transition metal ion homeostasis	BP	108	2	0.00593665
																				GO:0044853	plasma membrane raft	CC	109	2	0.0060437
																				GO:0044877	protein-containing complex binding	MF	1134	5	0.00615594
																				GO:0005887	integral component of plasma membrane	CC	1634	6	0.00624261
																				GO:0006959	humoral immune response	BP	356	3	0.0062698
																				GO:0044245	polysaccharide digestion	BP	6	1	0.00642631
																				GO:1900157	regulation of bone mineralization involved in bone maturation	BP	6	1	0.00642631
																				GO:2001268	negative regulation of cysteine-type endopeptidase activity involved in apoptotic signaling pathway	BP	6	1	0.00642631
																				GO:1903551	regulation of extracellular exosome assembly	BP	6	1	0.00642631
																				GO:0045861	negative regulation of proteolysis	BP	363	3	0.00661586
																				GO:0010038	response to metal ion	BP	364	3	0.00666621
																				GO:0032963	collagen metabolic process	BP	115	2	0.00670451
																				GO:0002682	regulation of immune system process	BP	1659	6	0.00672042
																				GO:1901222	regulation of NIK/NF-kappaB signaling	BP	117	2	0.0069318
																				GO:1990266	neutrophil migration	BP	118	2	0.00704675
																				GO:0009967	positive regulation of signal transduction	BP	1685	6	0.00724558
																				GO:0001704	formation of primary germ layer	BP	121	2	0.0073968
																				GO:0002684	positive regulation of immune system process	BP	1185	5	0.00740142
																				GO:0016043	cellular component organization	BP	6512	13	0.00745492
																				GO:0010046	response to mycotoxin	BP	7	1	0.00749352
																				GO:0070944	neutrophil mediated killing of bacterium	BP	7	1	0.00749352
																				GO:0019530	taurine metabolic process	BP	7	1	0.00749352
																				GO:0019694	alkanesulfonate metabolic process	BP	7	1	0.00749352
																				GO:0044854	plasma membrane raft assembly	BP	7	1	0.00749352
																				GO:0071971	extracellular exosome assembly	BP	7	1	0.00749352
																				GO:1901072	glucosamine-containing compound catabolic process	BP	7	1	0.00749352
																				GO:0097577	sequestering of iron ion	BP	7	1	0.00749352
																				GO:2000659	regulation of interleukin-1-mediated signaling pathway	BP	7	1	0.00749352
																				GO:0006564	L-serine biosynthetic process	BP	7	1	0.00749352
																				GO:0006566	threonine metabolic process	BP	7	1	0.00749352
																				GO:0004908	interleukin-1 receptor activity	MF	7	1	0.00749352
																				GO:0002696	positive regulation of leukocyte activation	BP	380	3	0.00750342
																				GO:0051101	regulation of DNA binding	BP	124	2	0.00775462
																				GO:0048284	organelle fusion	BP	124	2	0.00775462
																				GO:1901653	cellular response to peptide	BP	385	3	0.00777732
																				GO:0031226	intrinsic component of plasma membrane	CC	1713	6	0.00784445
																				GO:0009897	external side of plasma membrane	CC	393	3	0.00822785
																				GO:0034763	negative regulation of transmembrane transport	BP	128	2	0.00824371
																				GO:0002020	protease binding	MF	128	2	0.00824371
																				GO:0050867	positive regulation of cell activation	BP	394	3	0.00828523
																				GO:0044106	cellular amine metabolic process	BP	129	2	0.00836811
																				GO:0043313	regulation of neutrophil degranulation	BP	8	1	0.00855964
																				GO:0070943	neutrophil mediated killing of symbiont cell	BP	8	1	0.00855964
																				GO:1903012	positive regulation of bone development	BP	8	1	0.00855964
																				GO:0042420	dopamine catabolic process	BP	8	1	0.00855964
																				GO:0006548	histidine catabolic process	BP	8	1	0.00855964
																				GO:0052805	imidazole-containing compound catabolic process	BP	8	1	0.00855964
																				GO:0032650	regulation of interleukin-1 alpha production	BP	8	1	0.00855964
																				GO:0016615	malate dehydrogenase activity	MF	8	1	0.00855964
																				GO:0055076	transition metal ion homeostasis	BP	131	2	0.00861947
																				GO:0005178	integrin binding	MF	132	2	0.00874641
																				GO:0031401	positive regulation of protein modification process	BP	1237	5	0.00884576
																				GO:0062023	collagen-containing extracellular matrix	CC	406	3	0.00899249
																				GO:0001816	cytokine production	BP	790	4	0.00921753
																				GO:0042383	sarcolemma	CC	136	2	0.00926261
																				GO:0010635	regulation of mitochondrial fusion	BP	9	1	0.00962466
																				GO:0044857	plasma membrane raft organization	BP	9	1	0.00962466
																				GO:0019614	catechol-containing compound catabolic process	BP	9	1	0.00962466
																				GO:0042424	catecholamine catabolic process	BP	9	1	0.00962466
																				GO:0034145	positive regulation of toll-like receptor 4 signaling pathway	BP	9	1	0.00962466
																				GO:0001553	luteinization	BP	9	1	0.00962466
																				GO:0032610	interleukin-1 alpha production	BP	9	1	0.00962466
																				GO:0019966	interleukin-1 binding	MF	9	1	0.00962466
																				GO:0071840	cellular component organization or biogenesis	BP	6697	13	0.00966781
																				GO:0042737	drug catabolic process	BP	140	2	0.00979218
																				GO:0097530	granulocyte migration	BP	141	2	0.00992665
																				GO:0008286	insulin receptor signaling pathway	BP	141	2	0.00992665
																				GO:0051240	positive regulation of multicellular organismal process	BP	1811	6	0.01023
																				GO:0019220	regulation of phosphate metabolic process	BP	1816	6	0.0103644
																				GO:0051174	regulation of phosphorus metabolic process	BP	1818	6	0.0104186
																				GO:0042542	response to hydrogen peroxide	BP	146	2	0.0106114
																				GO:0033690	positive regulation of osteoblast proliferation	BP	10	1	0.0106886
																				GO:1900122	positive regulation of receptor binding	BP	10	1	0.0106886
																				GO:0070942	neutrophil mediated cytotoxicity	BP	10	1	0.0106886
																				GO:2000833	positive regulation of steroid hormone secretion	BP	10	1	0.0106886
																				GO:0070314	G1 to G0 transition	BP	10	1	0.0106886
																				GO:2000252	negative regulation of feeding behavior	BP	10	1	0.0106886
																				GO:0070341	fat cell proliferation	BP	10	1	0.0106886
																				GO:0070344	regulation of fat cell proliferation	BP	10	1	0.0106886
																				GO:0006547	histidine metabolic process	BP	10	1	0.0106886
																				GO:0016310	phosphorylation	BP	2417	7	0.0107961
																				GO:0048869	cellular developmental process	BP	4431	10	0.0108194
																				GO:0043434	response to peptide hormone	BP	436	3	0.0109133
																				GO:1903900	regulation of viral life cycle	BP	149	2	0.0110321
																				GO:0009968	negative regulation of signal transduction	BP	1313	5	0.0112984
																				GO:0005506	iron ion binding	MF	152	2	0.0114601
																				GO:1901678	iron coordination entity transport	BP	11	1	0.0117514
																				GO:1902563	regulation of neutrophil activation	BP	11	1	0.0117514
																				GO:0060159	regulation of dopamine receptor signaling pathway	BP	11	1	0.0117514
																				GO:0044793	negative regulation by host of viral process	BP	11	1	0.0117514
																				GO:2001204	regulation of osteoclast development	BP	11	1	0.0117514
																				GO:1903980	positive regulation of microglial cell activation	BP	11	1	0.0117514
																				GO:0046348	amino sugar catabolic process	BP	11	1	0.0117514
																				GO:0045217	cell-cell junction maintenance	BP	11	1	0.0117514
																				GO:0051673	membrane disruption in other organism	BP	11	1	0.0117514
																				GO:1905941	positive regulation of gonad development	BP	11	1	0.0117514
																				GO:1903011	negative regulation of bone development	BP	11	1	0.0117514
																				GO:0031399	regulation of protein modification process	BP	1867	6	0.0118099
																				GO:0006979	response to oxidative stress	BP	451	3	0.0119567
																				GO:0032501	multicellular organismal process	BP	7751	14	0.0125396
																				GO:0032680	regulation of tumor necrosis factor production	BP	160	2	0.0126368
																				GO:0051549	positive regulation of keratinocyte migration	BP	12	1	0.0128132
																				GO:0051873	killing by host of symbiont cells	BP	12	1	0.0128132
																				GO:0035630	bone mineralization involved in bone maturation	BP	12	1	0.0128132
																				GO:0006563	L-serine metabolic process	BP	12	1	0.0128132
																				GO:0002002	regulation of angiotensin levels in blood	BP	12	1	0.0128132
																				GO:0002003	angiotensin maturation	BP	12	1	0.0128132
																				GO:0019336	phenol-containing compound catabolic process	BP	12	1	0.0128132
																				GO:0052803	imidazole-containing compound metabolic process	BP	12	1	0.0128132
																				GO:0032640	tumor necrosis factor production	BP	163	2	0.0130912
																				GO:1903555	regulation of tumor necrosis factor superfamily cytokine production	BP	163	2	0.0130912
																				GO:0051128	regulation of cellular component organization	BP	2507	7	0.0131063
																				GO:0005488	binding	MF	15267	21	0.0131542
																				GO:0034614	cellular response to reactive oxygen species	BP	168	2	0.0138644
																				GO:0071706	tumor necrosis factor superfamily cytokine production	BP	168	2	0.0138644
																				GO:0001906	cell killing	BP	168	2	0.0138644
																				GO:0072672	neutrophil extravasation	BP	13	1	0.0138738
																				GO:0009635	response to herbicide	BP	13	1	0.0138738
																				GO:2000194	regulation of female gonad development	BP	13	1	0.0138738
																				GO:0001765	membrane raft assembly	BP	13	1	0.0138738
																				GO:0031665	negative regulation of lipopolysaccharide-mediated signaling pathway	BP	13	1	0.0138738
																				GO:0008201	heparin binding	MF	169	2	0.0140214
																				GO:0006022	aminoglycan metabolic process	BP	170	2	0.0141791
																				GO:0031347	regulation of defense response	BP	901	4	0.0144306
																				GO:0050727	regulation of inflammatory response	BP	485	3	0.0145307
																				GO:0055002	striated muscle cell development	BP	173	2	0.0146571
																				GO:0051547	regulation of keratinocyte migration	BP	14	1	0.0149334
																				GO:0051852	disruption by host of symbiont cells	BP	14	1	0.0149334
																				GO:0060009	Sertoli cell development	BP	14	1	0.0149334
																				GO:2001044	regulation of integrin-mediated signaling pathway	BP	14	1	0.0149334
																				GO:0034331	cell junction maintenance	BP	14	1	0.0149334
																				GO:0032101	regulation of response to external stimulus	BP	913	4	0.0150874
																				GO:0040011	locomotion	BP	1977	6	0.0154162
																				GO:0010648	negative regulation of cell communication	BP	1419	5	0.0154589
																				GO:0022406	membrane docking	BP	178	2	0.015469
																				GO:0007155	cell adhesion	BP	1420	5	0.0155025
																				GO:0051099	positive regulation of binding	BP	179	2	0.0156337
																				GO:0023057	negative regulation of signaling	BP	1423	5	0.0156339
																				GO:0050839	cell adhesion molecule binding	MF	499	3	0.0156758
																				GO:0009987	cellular process	BP	16968	22	0.0157713
																				GO:0008237	metallopeptidase activity	MF	181	2	0.0159654
																				GO:0051883	killing of cells in other organism involved in symbiotic interaction	BP	15	1	0.0159919
																				GO:1902188	positive regulation of viral release from host cell	BP	15	1	0.0159919
																				GO:0044406	adhesion of symbiont to host	BP	15	1	0.0159919
																				GO:1903543	positive regulation of exosomal secretion	BP	15	1	0.0159919
																				GO:0010821	regulation of mitochondrion organization	BP	182	2	0.0161324
																				GO:0048037	cofactor binding	MF	506	3	0.0162672
																				GO:0038061	NIK/NF-kappaB signaling	BP	183	2	0.0163001
																				GO:0007369	gastrulation	BP	185	2	0.0166378
																				GO:0055001	muscle cell development	BP	186	2	0.0168078
																				GO:0051704	multi-organism process	BP	2635	7	0.016999
																				GO:0002521	leukocyte differentiation	BP	515	3	0.017046
																				GO:2001170	negative regulation of ATP biosynthetic process	BP	16	1	0.0170493
																				GO:0044794	positive regulation by host of viral process	BP	16	1	0.0170493
																				GO:0050711	negative regulation of interleukin-1 secretion	BP	16	1	0.0170493
																				GO:0051238	sequestering of metal ion	BP	16	1	0.0170493
																				GO:0046325	negative regulation of glucose import	BP	16	1	0.0170493
																				GO:1903541	regulation of exosomal secretion	BP	16	1	0.0170493
																				GO:0001501	skeletal system development	BP	518	3	0.0173102
																				GO:0051051	negative regulation of transport	BP	522	3	0.0176662
																				GO:1901136	carbohydrate derivative catabolic process	BP	192	2	0.0178435
																				GO:0009636	response to toxic substance	BP	525	3	0.0179358
																				GO:0048521	negative regulation of behavior	BP	17	1	0.0181056
																				GO:0006544	glycine metabolic process	BP	17	1	0.0181056
																				GO:0009070	serine family amino acid biosynthetic process	BP	17	1	0.0181056
																				GO:2001267	regulation of cysteine-type endopeptidase activity involved in apoptotic signaling pathway	BP	17	1	0.0181056
																				GO:0051818	disruption of cells of other organism involved in symbiotic interaction	BP	17	1	0.0181056
																				GO:0090185	negative regulation of kidney development	BP	17	1	0.0181056
																				GO:0035988	chondrocyte proliferation	BP	17	1	0.0181056
																				GO:0032780	negative regulation of ATPase activity	BP	17	1	0.0181056
																				GO:0007005	mitochondrion organization	BP	530	3	0.0183904
																				GO:0032268	regulation of cellular protein metabolic process	BP	2679	7	0.0185148
																				GO:0030809	negative regulation of nucleotide biosynthetic process	BP	18	1	0.0191609
																				GO:1900372	negative regulation of purine nucleotide biosynthetic process	BP	18	1	0.0191609
																				GO:0032693	negative regulation of interleukin-10 production	BP	18	1	0.0191609
																				GO:0036035	osteoclast development	BP	18	1	0.0191609
																				GO:0044320	cellular response to leptin stimulus	BP	18	1	0.0191609
																				GO:0150078	positive regulation of neuroinflammatory response	BP	18	1	0.0191609
																				GO:0007250	activation of NF-kappaB-inducing kinase activity	BP	18	1	0.0191609
																				GO:0051050	positive regulation of transport	BP	982	4	0.0192378
																				GO:0009725	response to hormone	BP	987	4	0.0195638
																				GO:0022411	cellular component disassembly	BP	546	3	0.0198888
																				GO:0043410	positive regulation of MAPK cascade	BP	546	3	0.0198888
																				GO:0002573	myeloid leukocyte differentiation	BP	204	2	0.0199945
																				GO:0097164	ammonium ion metabolic process	BP	205	2	0.0201784
																				GO:0002544	chronic inflammatory response	BP	19	1	0.020215
																				GO:0032930	positive regulation of superoxide anion generation	BP	19	1	0.020215
																				GO:2000831	regulation of steroid hormone secretion	BP	19	1	0.020215
																				GO:0001991	regulation of systemic arterial blood pressure by circulatory renin-angiotensin	BP	19	1	0.020215
																				GO:1905939	regulation of gonad development	BP	19	1	0.020215
																				GO:0051546	keratinocyte migration	BP	19	1	0.020215
																				GO:2000696	regulation of epithelial cell differentiation involved in kidney development	BP	19	1	0.020215
																				GO:1990182	exosomal secretion	BP	19	1	0.020215
																				GO:0055114	oxidation-reduction process	BP	999	4	0.0203604
																				GO:0009653	anatomical structure morphogenesis	BP	2735	7	0.0205836
																				GO:0005886	plasma membrane	CC	5637	11	0.0206749
																				GO:0050792	regulation of viral process	BP	208	2	0.0207347
																				GO:0050794	regulation of cellular process	BP	11022	17	0.0207686
																				GO:0045087	innate immune response	BP	1008	4	0.0209711
																				GO:0050707	regulation of cytokine secretion	BP	210	2	0.0211091
																				GO:0009612	response to mechanical stimulus	BP	210	2	0.0211091
																				GO:0097529	myeloid leukocyte migration	BP	210	2	0.0211091
																				GO:0060008	Sertoli cell differentiation	BP	20	1	0.0212681
																				GO:0043931	ossification involved in bone maturation	BP	20	1	0.0212681
																				GO:1903978	regulation of microglial cell activation	BP	20	1	0.0212681
																				GO:0097734	extracellular exosome biogenesis	BP	20	1	0.0212681
																				GO:0034143	regulation of toll-like receptor 4 signaling pathway	BP	20	1	0.0212681
																				GO:0071682	endocytic vesicle lumen	CC	20	1	0.0212681
																				GO:0042060	wound healing	BP	564	3	0.021654
																				GO:0042493	response to drug	BP	1021	4	0.0218734
																				GO:0051259	protein complex oligomerization	BP	568	3	0.0220577
																				GO:0098542	defense response to other organism	BP	568	3	0.0220577
																				GO:0032869	cellular response to insulin stimulus	BP	216	2	0.0222493
																				GO:0042135	neurotransmitter catabolic process	BP	21	1	0.0223201
																				GO:1900016	negative regulation of cytokine production involved in inflammatory response	BP	21	1	0.0223201
																				GO:0009713	catechol-containing compound biosynthetic process	BP	21	1	0.0223201
																				GO:0042423	catecholamine biosynthetic process	BP	21	1	0.0223201
																				GO:0070584	mitochondrion morphogenesis	BP	21	1	0.0223201
																				GO:1904469	positive regulation of tumor necrosis factor secretion	BP	21	1	0.0223201
																				GO:0010829	negative regulation of glucose transmembrane transport	BP	21	1	0.0223201
																				GO:0002694	regulation of leukocyte activation	BP	571	3	0.0223632
																				GO:0017157	regulation of exocytosis	BP	217	2	0.0224418
																				GO:0008406	gonad development	BP	217	2	0.0224418
																				GO:0003824	catalytic activity	MF	5710	11	0.0227432
																				GO:0032928	regulation of superoxide anion generation	BP	22	1	0.023371
																				GO:0035929	steroid hormone secretion	BP	22	1	0.023371
																				GO:0035584	calcium-mediated signaling using intracellular calcium source	BP	22	1	0.023371
																				GO:0008053	mitochondrial fusion	BP	22	1	0.023371
																				GO:0044321	response to leptin	BP	22	1	0.023371
																				GO:1903077	negative regulation of protein localization to plasma membrane	BP	22	1	0.023371
																				GO:0140112	extracellular vesicle biogenesis	BP	22	1	0.023371
																				GO:1901605	alpha-amino acid metabolic process	BP	222	2	0.0234148
																				GO:0043903	regulation of symbiosis, encompassing mutualism through parasitism	BP	222	2	0.0234148
																				GO:0045137	development of primary sexual characteristics	BP	223	2	0.0236115
																				GO:0071417	cellular response to organonitrogen compound	BP	585	3	0.0238202
																				GO:0071944	cell periphery	CC	5756	11	0.0241271
																				GO:0016477	cell migration	BP	1592	5	0.0243153
																				GO:0042401	cellular biogenic amine biosynthetic process	BP	23	1	0.0244208
																				GO:0070977	bone maturation	BP	23	1	0.0244208
																				GO:0006541	glutamine metabolic process	BP	23	1	0.0244208
																				GO:0034123	positive regulation of toll-like receptor signaling pathway	BP	23	1	0.0244208
																				GO:0002080	acrosomal membrane	CC	23	1	0.0244208
																				GO:0009306	protein secretion	BP	591	3	0.0244603
																				GO:0030154	cell differentiation	BP	4239	9	0.0247924
																				GO:0005539	glycosaminoglycan binding	MF	229	2	0.024806
																				GO:0032270	positive regulation of cellular protein metabolic process	BP	1611	5	0.0254564
																				GO:0009309	amine biosynthetic process	BP	24	1	0.0254696
																				GO:0043302	positive regulation of leukocyte degranulation	BP	24	1	0.0254696
																				GO:0031579	membrane raft organization	BP	24	1	0.0254696
																				GO:0002227	innate immune response in mucosa	BP	24	1	0.0254696
																				GO:1903010	regulation of bone development	BP	24	1	0.0254696
																				GO:1904376	negative regulation of protein localization to cell periphery	BP	24	1	0.0254696
																				GO:1901071	glucosamine-containing compound metabolic process	BP	24	1	0.0254696
																				GO:0019865	immunoglobulin binding	MF	24	1	0.0254696
																				GO:0032879	regulation of localization	BP	2853	7	0.0254829
																				GO:1902533	positive regulation of intracellular signal transduction	BP	1082	4	0.0264301
																				GO:0050901	leukocyte tethering or rolling	BP	25	1	0.0265172
																				GO:0031664	regulation of lipopolysaccharide-mediated signaling pathway	BP	25	1	0.0265172
																				GO:0046914	transition metal ion binding	MF	1085	4	0.0266681
																				GO:2000116	regulation of cysteine-type endopeptidase activity	BP	239	2	0.0268513
																				GO:0050865	regulation of cell activation	BP	614	3	0.0270013
																				GO:0048513	animal organ development	BP	3583	8	0.0273655
																				GO:1903579	negative regulation of ATP metabolic process	BP	26	1	0.0275638
																				GO:0003081	regulation of systemic arterial blood pressure by renin-angiotensin	BP	26	1	0.0275638
																				GO:1900120	regulation of receptor binding	BP	26	1	0.0275638
																				GO:0002790	peptide secretion	BP	624	3	0.0281492
																				GO:0009719	response to endogenous stimulus	BP	1658	5	0.02843
																				GO:0060384	innervation	BP	27	1	0.0286094
																				GO:0000272	polysaccharide catabolic process	BP	27	1	0.0286094
																				GO:0060259	regulation of feeding behavior	BP	27	1	0.0286094
																				GO:0048799	animal organ maturation	BP	27	1	0.0286094
																				GO:0043032	positive regulation of macrophage activation	BP	27	1	0.0286094
																				GO:0045671	negative regulation of osteoclast differentiation	BP	27	1	0.0286094
																				GO:0010951	negative regulation of endopeptidase activity	BP	250	2	0.0291779
																				GO:1901681	sulfur compound binding	MF	250	2	0.0291779
																				GO:0051246	regulation of protein metabolic process	BP	2936	7	0.0293936
																				GO:0032269	negative regulation of cellular protein metabolic process	BP	1119	4	0.0294581
																				GO:0033688	regulation of osteoblast proliferation	BP	28	1	0.0296538
																				GO:1900543	negative regulation of purine nucleotide metabolic process	BP	28	1	0.0296538
																				GO:2001025	positive regulation of response to drug	BP	28	1	0.0296538
																				GO:0009074	aromatic amino acid family catabolic process	BP	28	1	0.0296538
																				GO:0009893	positive regulation of metabolic process	BP	3642	8	0.0299449
																				GO:0045980	negative regulation of nucleotide metabolic process	BP	29	1	0.0306972
																				GO:0072606	interleukin-8 secretion	BP	29	1	0.0306972
																				GO:0010800	positive regulation of peptidyl-threonine phosphorylation	BP	29	1	0.0306972
																				GO:0043236	laminin binding	MF	29	1	0.0306972
																				GO:0043539	protein serine/threonine kinase activator activity	MF	29	1	0.0306972
																				GO:0048585	negative regulation of response to stimulus	BP	1693	5	0.0307863
																				GO:1901699	cellular response to nitrogen compound	BP	648	3	0.031011
																				GO:0042127	regulation of cell proliferation	BP	1700	5	0.0312723
																				GO:0090200	positive regulation of release of cytochrome c from mitochondria	BP	30	1	0.0317395
																				GO:1905476	negative regulation of protein localization to membrane	BP	30	1	0.0317395
																				GO:0002102	podosome	CC	30	1	0.0317395
																				GO:0010466	negative regulation of peptidase activity	BP	262	2	0.0318057
																				GO:0044459	plasma membrane part	CC	2985	7	0.0318918
																				GO:0044464	cell part	CC	17521	22	0.0319503
																				GO:0048856	anatomical structure development	BP	5988	11	0.0321304
																				GO:0051247	positive regulation of protein metabolic process	BP	1713	5	0.0321881
																				GO:0033687	osteoblast proliferation	BP	31	1	0.0327808
																				GO:0045742	positive regulation of epidermal growth factor receptor signaling pathway	BP	31	1	0.0327808
																				GO:0002888	positive regulation of myeloid leukocyte mediated immunity	BP	31	1	0.0327808
																				GO:1902186	regulation of viral release from host cell	BP	31	1	0.0327808
																				GO:0031668	cellular response to extracellular stimulus	BP	268	2	0.0331538
																				GO:0042802	identical protein binding	MF	1728	5	0.0332662
																				GO:0007548	sex differentiation	BP	270	2	0.0336082
																				GO:0070207	protein homotrimerization	BP	32	1	0.0338209
																				GO:0045745	positive regulation of G protein-coupled receptor signaling pathway	BP	32	1	0.0338209
																				GO:0048741	skeletal muscle fiber development	BP	32	1	0.0338209
																				GO:1904467	regulation of tumor necrosis factor secretion	BP	32	1	0.0338209
																				GO:0098742	cell-cell adhesion via plasma-membrane adhesion molecules	BP	273	2	0.0342944
																				GO:0009611	response to wounding	BP	678	3	0.0347996
																				GO:0005623	cell	CC	17590	22	0.0348378
																				GO:1901186	positive regulation of ERBB signaling pathway	BP	33	1	0.03486
																				GO:0016486	peptide hormone processing	BP	33	1	0.03486
																				GO:0048870	cell motility	BP	1751	5	0.0349641
																				GO:0051674	localization of cell	BP	1751	5	0.0349641
																				GO:0001822	kidney development	BP	278	2	0.0354504
																				GO:0051248	negative regulation of protein metabolic process	BP	1188	4	0.0356494
																				GO:0009925	basal plasma membrane	CC	34	1	0.0358981
																				GO:0044093	positive regulation of molecular function	BP	1771	5	0.036485
																				GO:0014904	myotube cell development	BP	35	1	0.036935
																				GO:0098751	bone cell development	BP	35	1	0.036935
																				GO:1990774	tumor necrosis factor secretion	BP	35	1	0.036935
																				GO:0019076	viral release from host cell	BP	35	1	0.036935
																				GO:0035890	exit from host	BP	35	1	0.036935
																				GO:0035891	exit from host cell	BP	35	1	0.036935
																				GO:0052126	movement in host environment	BP	35	1	0.036935
																				GO:0052192	movement in environment of other organism involved in symbiotic interaction	BP	35	1	0.036935
																				GO:0034142	toll-like receptor 4 signaling pathway	BP	35	1	0.036935
																				GO:0016831	carboxy-lyase activity	MF	35	1	0.036935
																				GO:0001530	lipopolysaccharide binding	MF	35	1	0.036935
																				GO:0042554	superoxide anion generation	BP	36	1	0.037971
																				GO:0090322	regulation of superoxide metabolic process	BP	36	1	0.037971
																				GO:0046627	negative regulation of insulin receptor signaling pathway	BP	36	1	0.037971
																				GO:0071709	membrane assembly	BP	36	1	0.037971
																				GO:0002385	mucosal immune response	BP	36	1	0.037971
																				GO:2001171	positive regulation of ATP biosynthetic process	BP	36	1	0.037971
																				GO:0050662	coenzyme binding	MF	291	2	0.0385267
																				GO:1900026	positive regulation of substrate adhesion-dependent cell spreading	BP	37	1	0.0390058
																				GO:0071276	cellular response to cadmium ion	BP	37	1	0.0390058
																				GO:0072001	renal system development	BP	293	2	0.0390089
																				GO:0051146	striated muscle cell differentiation	BP	293	2	0.0390089
																				GO:0048471	perinuclear region of cytoplasm	CC	711	3	0.0392368
																				GO:0033036	macromolecule localization	BP	3116	7	0.0392947
																				GO:0098802	plasma membrane receptor complex	CC	295	2	0.0394934
																				GO:0003674	molecular_function	MF	17697	22	0.0398134
																				GO:1900077	negative regulation of cellular response to insulin stimulus	BP	38	1	0.0400396
																				GO:0006040	amino sugar metabolic process	BP	38	1	0.0400396
																				GO:0001817	regulation of cytokine production	BP	719	3	0.0403548
																				GO:0007169	transmembrane receptor protein tyrosine kinase signaling pathway	BP	719	3	0.0403548
																				GO:0042417	dopamine metabolic process	BP	39	1	0.0410723
																				GO:0032692	negative regulation of interleukin-1 production	BP	39	1	0.0410723
																				GO:0030501	positive regulation of bone mineralization	BP	39	1	0.0410723
																				GO:0002251	organ or tissue specific immune response	BP	39	1	0.0410723
																				GO:0009072	aromatic amino acid family metabolic process	BP	39	1	0.0410723
																				GO:0034599	cellular response to oxidative stress	BP	302	2	0.0412077
																				GO:0060326	cell chemotaxis	BP	304	2	0.0417026
																				GO:0001990	regulation of systemic arterial blood pressure by hormone	BP	40	1	0.042104
																				GO:0051130	positive regulation of cellular component organization	BP	1258	4	0.0426667
																				GO:0033043	regulation of organelle organization	BP	1261	4	0.0429842
																				GO:0010955	negative regulation of protein processing	BP	41	1	0.0431346
																				GO:1903318	negative regulation of protein maturation	BP	41	1	0.0431346
																				GO:0044091	membrane biogenesis	BP	41	1	0.0431346
																				GO:0045121	membrane raft	CC	315	2	0.0444655
																				GO:0016491	oxidoreductase activity	MF	748	3	0.0445451
																				GO:0044446	intracellular organelle part	CC	9811	15	0.044628
																				GO:0098857	membrane microdomain	CC	316	2	0.04472
																				GO:0098796	membrane protein complex	CC	1278	4	0.0448093
																				GO:0006508	proteolysis	BP	1874	5	0.0449843
																				GO:1904646	cellular response to amyloid-beta	BP	43	1	0.0451926
																				GO:0045429	positive regulation of nitric oxide biosynthetic process	BP	43	1	0.0451926
																				GO:0007568	aging	BP	321	2	0.046001
																				GO:0071375	cellular response to peptide hormone stimulus	BP	321	2	0.046001
																				GO:0016787	hydrolase activity	MF	2533	6	0.0460497
																				GO:0035850	epithelial cell differentiation involved in kidney development	BP	44	1	0.04622
																				GO:0007212	dopamine receptor signaling pathway	BP	44	1	0.04622
																				GO:0061756	leukocyte adhesion to vascular endothelial cell	BP	44	1	0.04622
																				GO:0030225	macrophage differentiation	BP	44	1	0.04622
																				GO:0044060	regulation of endocrine process	BP	44	1	0.04622
																				GO:1904407	positive regulation of nitric oxide metabolic process	BP	44	1	0.04622
																				GO:0046189	phenol-containing compound biosynthetic process	BP	44	1	0.04622
																				GO:0031224	intrinsic component of membrane	CC	5495	10	0.0464148
																				GO:1901565	organonitrogen compound catabolic process	BP	1296	4	0.0467901
																				GO:0016050	vesicle organization	BP	325	2	0.0470357
																				GO:0048483	autonomic nervous system development	BP	45	1	0.0472464
																				GO:0043408	regulation of MAPK cascade	BP	768	3	0.0475595
																				GO:0016485	protein processing	BP	328	2	0.0478173
																				GO:0019058	viral life cycle	BP	328	2	0.0478173
																				GO:0098589	membrane region	CC	328	2	0.0478173
																				GO:0043300	regulation of leukocyte degranulation	BP	46	1	0.0482717
																				GO:1900015	regulation of cytokine production involved in inflammatory response	BP	46	1	0.0482717
																				GO:0030810	positive regulation of nucleotide biosynthetic process	BP	46	1	0.0482717
																				GO:1900373	positive regulation of purine nucleotide biosynthetic process	BP	46	1	0.0482717
																				GO:0022602	ovulation cycle process	BP	46	1	0.0482717
																				GO:0007157	heterophilic cell-cell adhesion via plasma membrane cell adhesion molecules	BP	46	1	0.0482717
																				GO:0071354	cellular response to interleukin-6	BP	46	1	0.0482717
																				GO:0030659	cytoplasmic vesicle membrane	CC	773	3	0.0483289
																				GO:0001655	urogenital system development	BP	330	2	0.0483412
																				GO:0051239	regulation of multicellular organismal process	BP	3260	7	0.0487109
																				GO:0051241	negative regulation of multicellular organismal process	BP	1316	4	0.0490493
																				GO:0051181	cofactor transport	BP	47	1	0.049296
																				GO:1903580	positive regulation of ATP metabolic process	BP	47	1	0.049296
																				GO:0070169	positive regulation of biomineral tissue development	BP	47	1	0.049296
																				GO:0060986	endocrine hormone secretion	BP	47	1	0.049296
																				GO:0010799	regulation of peptidyl-threonine phosphorylation	BP	47	1	0.049296
																				GO:0002832	negative regulation of response to biotic stimulus	BP	47	1	0.049296
																				GO:0007159	leukocyte cell-cell adhesion	BP	337	2	0.0501914
																				GO:0001774	microglial cell activation	BP	48	1	0.0503192
																				GO:0002269	leukocyte activation involved in inflammatory response	BP	48	1	0.0503192
																				GO:0009069	serine family amino acid metabolic process	BP	48	1	0.0503192
																				GO:0090199	regulation of release of cytochrome c from mitochondria	BP	48	1	0.0503192
																				GO:0002762	negative regulation of myeloid leukocyte differentiation	BP	48	1	0.0503192
																				GO:0044764	multi-organism cellular process	BP	48	1	0.0503192
																				GO:0071496	cellular response to external stimulus	BP	339	2	0.0507248
																				GO:0035094	response to nicotine	BP	49	1	0.0513413
																				GO:0030857	negative regulation of epithelial cell differentiation	BP	49	1	0.0513413
																				GO:0002534	cytokine production involved in inflammatory response	BP	49	1	0.0513413
																				GO:0003044	regulation of systemic arterial blood pressure mediated by a chemical signal	BP	49	1	0.0513413
																				GO:1904707	positive regulation of vascular smooth muscle cell proliferation	BP	49	1	0.0513413
																				GO:0012506	vesicle membrane	CC	794	3	0.0516288
																				GO:0032502	developmental process	BP	6411	11	0.0517395
																				GO:0009056	catabolic process	BP	2615	6	0.0525905
																				GO:0006796	phosphate-containing compound metabolic process	BP	3320	7	0.0530473
																				GO:1902531	regulation of intracellular signal transduction	BP	1961	5	0.053051
																				GO:0007566	embryo implantation	BP	51	1	0.0533825
																				GO:2001258	negative regulation of cation channel activity	BP	51	1	0.0533825
																				GO:0045178	basal part of cell	CC	51	1	0.0533825
																				GO:0016830	carbon-carbon lyase activity	MF	51	1	0.0533825
																				GO:0031325	positive regulation of cellular metabolic process	BP	3330	7	0.0537943
																				GO:0051260	protein homooligomerization	BP	351	2	0.0539687
																				GO:1900024	regulation of substrate adhesion-dependent cell spreading	BP	52	1	0.0544015
																				GO:0032653	regulation of interleukin-10 production	BP	52	1	0.0544015
																				GO:0031589	cell-substrate adhesion	BP	354	2	0.0547912
																				GO:0006793	phosphorus metabolic process	BP	3347	7	0.0550801
																				GO:0010043	response to zinc ion	BP	53	1	0.0554195
																				GO:1903307	positive regulation of regulated secretory pathway	BP	53	1	0.0554195
																				GO:0050704	regulation of interleukin-1 secretion	BP	53	1	0.0554195
																				GO:0070206	protein trimerization	BP	54	1	0.0564364
																				GO:0061005	cell differentiation involved in kidney development	BP	54	1	0.0564364
																				GO:0009066	aspartate family amino acid metabolic process	BP	54	1	0.0564364
																				GO:0030170	pyridoxal phosphate binding	MF	54	1	0.0564364
																				GO:0070279	vitamin B6 binding	MF	54	1	0.0564364
																				GO:0010604	positive regulation of macromolecule metabolic process	BP	3366	7	0.0565412
																				GO:0002886	regulation of myeloid leukocyte mediated immunity	BP	55	1	0.0574523
																				GO:0032613	interleukin-10 production	BP	55	1	0.0574523
																				GO:0043954	cellular component maintenance	BP	55	1	0.0574523
																				GO:0043030	regulation of macrophage activation	BP	55	1	0.0574523
																				GO:0030162	regulation of proteolysis	BP	831	3	0.0577089
																				GO:0032102	negative regulation of response to external stimulus	BP	365	2	0.0578457
																				GO:0006869	lipid transport	BP	365	2	0.0578457
																				GO:0006520	cellular amino acid metabolic process	BP	366	2	0.0581264
																				GO:0090183	regulation of kidney development	BP	56	1	0.0584671
																				GO:0051287	NAD binding	MF	56	1	0.0584671
																				GO:0098609	cell-cell adhesion	BP	839	3	0.0590676
																				GO:0044422	organelle part	CC	10112	15	0.0592907
																				GO:0008283	cell proliferation	BP	2024	5	0.059409
																				GO:0071398	cellular response to fatty acid	BP	57	1	0.0594809
																				GO:0045981	positive regulation of nucleotide metabolic process	BP	57	1	0.0594809
																				GO:1900544	positive regulation of purine nucleotide metabolic process	BP	57	1	0.0594809
																				GO:1903428	positive regulation of reactive oxygen species biosynthetic process	BP	57	1	0.0594809
																				GO:0007029	endoplasmic reticulum organization	BP	57	1	0.0594809
																				GO:0050840	extracellular matrix binding	MF	57	1	0.0594809
																				GO:0050793	regulation of developmental process	BP	2696	6	0.0596107
																				GO:0051098	regulation of binding	BP	373	2	0.0601046
																				GO:0061900	glial cell activation	BP	58	1	0.0604937
																				GO:0031663	lipopolysaccharide-mediated signaling pathway	BP	58	1	0.0604937
																				GO:0035577	azurophil granule membrane	CC	58	1	0.0604937
																				GO:0004869	cysteine-type endopeptidase inhibitor activity	MF	58	1	0.0604937
																				GO:0031974	membrane-enclosed lumen	CC	5740	10	0.0608897
																				GO:0043233	organelle lumen	CC	5740	10	0.0608897
																				GO:0070013	intracellular organelle lumen	CC	5740	10	0.0608897
																				GO:0001836	release of cytochrome c from mitochondria	BP	59	1	0.0615054
																				GO:0045071	negative regulation of viral genome replication	BP	59	1	0.0615054
																				GO:0097110	scaffold protein binding	MF	59	1	0.0615054
																				GO:0051094	positive regulation of developmental process	BP	1418	4	0.0615275
																				GO:0046324	regulation of glucose import	BP	60	1	0.062516
																				GO:0046794	transport of virus	BP	60	1	0.062516
																				GO:0042803	protein homodimerization activity	MF	859	3	0.0625321
																				GO:0032370	positive regulation of lipid transport	BP	61	1	0.0635257
																				GO:0050701	interleukin-1 secretion	BP	61	1	0.0635257
																				GO:1903902	positive regulation of viral life cycle	BP	61	1	0.0635257
																				GO:0006027	glycosaminoglycan catabolic process	BP	61	1	0.0635257
																				GO:0048306	calcium-dependent protein binding	MF	61	1	0.0635257
																				GO:0042692	muscle cell differentiation	BP	385	2	0.0635502
																				GO:0034394	protein localization to cell surface	BP	63	1	0.0655418
																				GO:0046686	response to cadmium ion	BP	63	1	0.0655418
																				GO:0045669	positive regulation of osteoblast differentiation	BP	64	1	0.0665483
																				GO:0045670	regulation of osteoclast differentiation	BP	64	1	0.0665483
																				GO:0048278	vesicle docking	BP	64	1	0.0665483
																				GO:0044403	symbiont process	BP	884	3	0.0669972
																				GO:0051604	protein maturation	BP	397	2	0.0670629
																				GO:0030097	hemopoiesis	BP	887	3	0.0675429
																				GO:0010876	lipid localization	BP	400	2	0.0679513
																				GO:0045428	regulation of nitric oxide biosynthetic process	BP	66	1	0.0685582
																				GO:0046626	regulation of insulin receptor signaling pathway	BP	66	1	0.0685582
																				GO:1901607	alpha-amino acid biosynthetic process	BP	66	1	0.0685582
																				GO:0010494	cytoplasmic stress granule	CC	66	1	0.0685582
																				GO:0071702	organic substance transport	BP	2791	6	0.0685653
																				GO:0045785	positive regulation of cell adhesion	BP	403	2	0.0688438
																				GO:0043900	regulation of multi-organism process	BP	405	2	0.069441
																				GO:0048747	muscle fiber development	BP	67	1	0.0695617
																				GO:0050778	positive regulation of immune response	BP	902	3	0.0703032
																				GO:0035924	cellular response to vascular endothelial growth factor stimulus	BP	68	1	0.070564
																				GO:0046323	glucose import	BP	68	1	0.070564
																				GO:2000243	positive regulation of reproductive process	BP	69	1	0.0715654
																				GO:0042698	ovulation cycle	BP	69	1	0.0715654
																				GO:0061515	myeloid cell development	BP	70	1	0.0725657
																				GO:0034121	regulation of toll-like receptor signaling pathway	BP	70	1	0.0725657
																				GO:0030099	myeloid cell differentiation	BP	416	2	0.0727567
																				GO:0050795	regulation of behavior	BP	71	1	0.073565
																				GO:0051881	regulation of mitochondrial membrane potential	BP	72	1	0.0745633
																				GO:1903556	negative regulation of tumor necrosis factor superfamily cytokine production	BP	72	1	0.0745633
																				GO:0002532	production of molecular mediator involved in inflammatory response	BP	72	1	0.0745633
																				GO:0038034	signal transduction in absence of ligand	BP	72	1	0.0745633
																				GO:0097192	extrinsic apoptotic signaling pathway in absence of ligand	BP	72	1	0.0745633
																				GO:0048534	hematopoietic or lymphoid organ development	BP	929	3	0.0754028
																				GO:0052548	regulation of endopeptidase activity	BP	425	2	0.0755082
																				GO:0006801	superoxide metabolic process	BP	73	1	0.0755605
																				GO:0061844	antimicrobial humoral immune response mediated by antimicrobial peptide	BP	73	1	0.0755605
																				GO:0044766	multi-organism transport	BP	73	1	0.0755605
																				GO:1902579	multi-organism localization	BP	73	1	0.0755605
																				GO:0070821	tertiary granule membrane	CC	73	1	0.0755605
																				GO:0044419	interspecies interaction between organisms	BP	932	3	0.0759798
																				GO:0001895	retina homeostasis	BP	74	1	0.0765567
																				GO:1901616	organic hydroxy compound catabolic process	BP	74	1	0.0765567
																				GO:1900076	regulation of cellular response to insulin stimulus	BP	74	1	0.0765567
																				GO:0050710	negative regulation of cytokine secretion	BP	74	1	0.0765567
																				GO:0009064	glutamine family amino acid metabolic process	BP	74	1	0.0765567
																				GO:0048608	reproductive structure development	BP	431	2	0.0773614
																				GO:0048468	cell development	BP	2183	5	0.077405
																				GO:0001960	negative regulation of cytokine-mediated signaling pathway	BP	75	1	0.0775519
																				GO:1902117	positive regulation of organelle assembly	BP	75	1	0.0775519
																				GO:0061458	reproductive system development	BP	434	2	0.0782936
																				GO:0030500	regulation of bone mineralization	BP	76	1	0.0785461
																				GO:0001937	negative regulation of endothelial cell proliferation	BP	76	1	0.0785461
																				GO:0006809	nitric oxide biosynthetic process	BP	77	1	0.0795392
																				GO:0044215	other organism	CC	77	1	0.0795392
																				GO:0044216	other organism cell	CC	77	1	0.0795392
																				GO:0044217	other organism part	CC	77	1	0.0795392
																				GO:0032413	negative regulation of ion transmembrane transporter activity	BP	78	1	0.0805313
																				GO:0010827	regulation of glucose transmembrane transport	BP	78	1	0.0805313
																				GO:0000165	MAPK cascade	BP	958	3	0.0810646
																				GO:0006928	movement of cell or subcellular component	BP	2213	5	0.0811139
																				GO:0021675	nerve development	BP	79	1	0.0815224
																				GO:0097367	carbohydrate derivative binding	MF	2219	5	0.0818676
																				GO:0043462	regulation of ATPase activity	BP	80	1	0.0825125
																				GO:0005901	caveola	CC	80	1	0.0825125
																				GO:0030295	protein kinase activator activity	MF	80	1	0.0825125
																				GO:0023014	signal transduction by protein phosphorylation	BP	969	3	0.0832611
																				GO:0060761	negative regulation of response to cytokine stimulus	BP	81	1	0.0835016
																				GO:0030512	negative regulation of transforming growth factor beta receptor signaling pathway	BP	81	1	0.0835016
																				GO:0052547	regulation of peptidase activity	BP	452	2	0.0839625
																				GO:1905954	positive regulation of lipid localization	BP	82	1	0.0844896
																				GO:0046209	nitric oxide metabolic process	BP	82	1	0.0844896
																				GO:0032637	interleukin-8 production	BP	82	1	0.0844896
																				GO:0008652	cellular amino acid biosynthetic process	BP	83	1	0.0854766
																				GO:1903845	negative regulation of cellular response to transforming growth factor beta stimulus	BP	83	1	0.0854766
																				GO:0005902	microvillus	CC	83	1	0.0854766
																				GO:0035556	intracellular signal transduction	BP	2952	6	0.0855449
																				GO:0043154	negative regulation of cysteine-type endopeptidase activity involved in apoptotic process	BP	84	1	0.0864626
																				GO:0045445	myoblast differentiation	BP	84	1	0.0864626
																				GO:0002520	immune system development	BP	985	3	0.0865035
																				GO:2001057	reactive nitrogen species metabolic process	BP	85	1	0.0874476
																				GO:1904705	regulation of vascular smooth muscle cell proliferation	BP	85	1	0.0874476
																				GO:1990874	vascular smooth muscle cell proliferation	BP	85	1	0.0874476
																				GO:1903901	negative regulation of viral life cycle	BP	85	1	0.0874476
																				GO:0070542	response to fatty acid	BP	86	1	0.0884316
																				GO:0048013	ephrin receptor signaling pathway	BP	86	1	0.0884316
																				GO:0042058	regulation of epidermal growth factor receptor signaling pathway	BP	86	1	0.0884316
																				GO:0032760	positive regulation of tumor necrosis factor production	BP	86	1	0.0884316
																				GO:0019209	kinase activator activity	MF	86	1	0.0884316
																				GO:0051346	negative regulation of hydrolase activity	BP	466	2	0.0884588
																				GO:0006112	energy reserve metabolic process	BP	87	1	0.0894146
																				GO:1903557	positive regulation of tumor necrosis factor superfamily cytokine production	BP	88	1	0.0903965
																				GO:0050708	regulation of protein secretion	BP	472	2	0.0904083
																				GO:0032410	negative regulation of transporter activity	BP	89	1	0.0913775
																				GO:0016021	integral component of membrane	CC	5330	9	0.0921914
																				GO:0045778	positive regulation of ossification	BP	90	1	0.0923574
																				GO:0032880	regulation of protein localization	BP	1014	3	0.0925207
																				GO:0009790	embryo development	BP	1017	3	0.0931533
																				GO:1904063	negative regulation of cation transmembrane transport	BP	91	1	0.0933363
																				GO:0045638	negative regulation of myeloid cell differentiation	BP	91	1	0.0933363
																				GO:0060333	interferon-gamma-mediated signaling pathway	BP	91	1	0.0933363
																				GO:0035579	specific granule membrane	CC	91	1	0.0933363
																				GO:0031234	extrinsic component of cytoplasmic side of plasma membrane	CC	91	1	0.0933363
																				GO:0048871	multicellular organismal homeostasis	BP	485	2	0.0946769
																				GO:0080134	regulation of response to stress	BP	1645	4	0.0949415
																				GO:0032092	positive regulation of protein binding	BP	93	1	0.0952912
																				GO:0003073	regulation of systemic arterial blood pressure	BP	93	1	0.0952912
																				GO:1901184	regulation of ERBB signaling pathway	BP	93	1	0.0952912
																				GO:0070167	regulation of biomineral tissue development	BP	94	1	0.0962671
																				GO:0006906	vesicle fusion	BP	94	1	0.0962671
																				GO:0004553	hydrolase activity, hydrolyzing O-glycosyl compounds	MF	94	1	0.0962671
																				GO:1903076	regulation of protein localization to plasma membrane	BP	95	1	0.097242
																				GO:0045069	regulation of viral genome replication	BP	95	1	0.097242
																				GO:0042102	positive regulation of T cell proliferation	BP	95	1	0.097242
																				GO:0042116	macrophage activation	BP	95	1	0.097242
																				GO:0043202	lysosomal lumen	CC	95	1	0.097242
																				GO:2001169	regulation of ATP biosynthetic process	BP	96	1	0.0982159
																				GO:0008585	female gonad development	BP	96	1	0.0982159
																				GO:0032755	positive regulation of interleukin-6 production	BP	96	1	0.0982159
																				GO:0004896	cytokine receptor activity	MF	96	1	0.0982159
																				GO:0098805	whole membrane	CC	1666	4	0.0984137
																				GO:0007167	enzyme linked receptor protein signaling pathway	BP	1045	3	0.0991482
																				GO:0051591	response to cAMP	BP	97	1	0.0991888
																				GO:0120162	positive regulation of cold-induced thermogenesis	BP	97	1	0.0991888
																				GO:0001657	ureteric bud development	BP	97	1	0.0991888
																				GO:0030316	osteoclast differentiation	BP	97	1	0.0991888
																				GO:0031667	response to nutrient levels	BP	499	2	0.0993404
																				GO:0002791	regulation of peptide secretion	BP	500	2	0.0996761
																				GO:0072163	mesonephric epithelium development	BP	98	1	0.100161
																				GO:0072164	mesonephric tubule development	BP	98	1	0.100161
																				GO:2001243	negative regulation of intrinsic apoptotic signaling pathway	BP	98	1	0.100161
																				GO:0070301	cellular response to hydrogen peroxide	BP	99	1	0.101132
																				GO:0048525	negative regulation of viral process	BP	99	1	0.101132
																				GO:0043235	receptor complex	CC	505	2	0.101359
																				GO:2001023	regulation of response to drug	BP	100	1	0.102101
																				GO:0034446	substrate adhesion-dependent cell spreading	BP	100	1	0.102101
																				GO:0090174	organelle membrane fusion	BP	100	1	0.102101
																				GO:0070498	interleukin-1-mediated signaling pathway	BP	100	1	0.102101
																				GO:0050830	defense response to Gram-positive bacterium	BP	101	1	0.10307
																				GO:1903426	regulation of reactive oxygen species biosynthetic process	BP	101	1	0.10307
																				GO:0046545	development of primary female sexual characteristics	BP	101	1	0.10307
																				GO:0007631	feeding behavior	BP	101	1	0.10307
																				GO:0048661	positive regulation of smooth muscle cell proliferation	BP	101	1	0.10307
																				GO:0001823	mesonephros development	BP	102	1	0.104038
																				GO:0005796	Golgi lumen	CC	102	1	0.104038
																				GO:0032652	regulation of interleukin-1 production	BP	103	1	0.105005
																				GO:0034766	negative regulation of ion transmembrane transport	BP	103	1	0.105005
																				GO:1902106	negative regulation of leukocyte differentiation	BP	103	1	0.105005
																				GO:0001523	retinoid metabolic process	BP	104	1	0.105971
																				GO:0030593	neutrophil chemotaxis	BP	104	1	0.105971
																				GO:0030175	filopodium	CC	104	1	0.105971
																				GO:0031349	positive regulation of defense response	BP	521	2	0.106801
																				GO:0007009	plasma membrane organization	BP	105	1	0.106936
																				GO:0007275	multicellular organism development	BP	5491	9	0.10764
																				GO:1901606	alpha-amino acid catabolic process	BP	106	1	0.1079
																				GO:0021510	spinal cord development	BP	106	1	0.1079
																				GO:0006091	generation of precursor metabolites and energy	BP	526	2	0.108518
																				GO:0008144	drug binding	MF	1727	4	0.10885
																				GO:0062014	negative regulation of small molecule metabolic process	BP	107	1	0.108863
																				GO:0048524	positive regulation of viral process	BP	107	1	0.108863
																				GO:0001909	leukocyte mediated cytotoxicity	BP	107	1	0.108863
																				GO:0010817	regulation of hormone levels	BP	529	2	0.109552
																				GO:1904659	glucose transmembrane transport	BP	108	1	0.109825
																				GO:0001669	acrosomal vesicle	CC	108	1	0.109825
																				GO:0009991	response to extracellular stimulus	BP	531	2	0.110243
																				GO:0045860	positive regulation of protein kinase activity	BP	532	2	0.110589
																				GO:0060627	regulation of vesicle-mediated transport	BP	532	2	0.110589
																				GO:1901615	organic hydroxy compound metabolic process	BP	535	2	0.111629
																				GO:0016101	diterpenoid metabolic process	BP	110	1	0.111746
																				GO:0006024	glycosaminoglycan biosynthetic process	BP	110	1	0.111746
																				GO:0014902	myotube differentiation	BP	112	1	0.113662
																				GO:1903828	negative regulation of cellular protein localization	BP	112	1	0.113662
																				GO:0001938	positive regulation of endothelial cell proliferation	BP	112	1	0.113662
																				GO:0008645	hexose transmembrane transport	BP	112	1	0.113662
																				GO:0035295	tube development	BP	1110	3	0.113672
																				GO:0060349	bone morphogenesis	BP	114	1	0.115575
																				GO:0030282	bone mineralization	BP	114	1	0.115575
																				GO:0005976	polysaccharide metabolic process	BP	114	1	0.115575
																				GO:0015749	monosaccharide transmembrane transport	BP	114	1	0.115575
																				GO:0009055	electron transfer activity	MF	114	1	0.115575
																				GO:0051173	positive regulation of nitrogen compound metabolic process	BP	3200	6	0.116149
																				GO:0032612	interleukin-1 production	BP	115	1	0.11653
																				GO:1904375	regulation of protein localization to cell periphery	BP	115	1	0.11653
																				GO:0046660	female sex differentiation	BP	115	1	0.11653
																				GO:0006023	aminoglycan biosynthetic process	BP	115	1	0.11653
																				GO:0042626	ATPase activity, coupled to transmembrane movement of substances	MF	115	1	0.11653
																				GO:0043492	ATPase activity, coupled to movement of substances	MF	115	1	0.11653
																				GO:0021782	glial cell development	BP	116	1	0.117484
																				GO:0034219	carbohydrate transmembrane transport	BP	116	1	0.117484
																				GO:1900371	regulation of purine nucleotide biosynthetic process	BP	117	1	0.118438
																				GO:0002761	regulation of myeloid leukocyte differentiation	BP	117	1	0.118438
																				GO:0010822	positive regulation of mitochondrion organization	BP	117	1	0.118438
																				GO:0016798	hydrolase activity, acting on glycosyl bonds	MF	117	1	0.118438
																				GO:0030808	regulation of nucleotide biosynthetic process	BP	118	1	0.11939
																				GO:0007173	epidermal growth factor receptor signaling pathway	BP	119	1	0.120341
																				GO:0016616	oxidoreductase activity, acting on the CH-OH group of donors, NAD or NADP as acceptor	MF	119	1	0.120341
																				GO:0006721	terpenoid metabolic process	BP	120	1	0.121291
																				GO:0017015	regulation of transforming growth factor beta receptor signaling pathway	BP	120	1	0.121291
																				GO:0010811	positive regulation of cell-substrate adhesion	BP	121	1	0.12224
																				GO:0046718	viral entry into host cell	BP	121	1	0.12224
																				GO:1903409	reactive oxygen species biosynthetic process	BP	122	1	0.123188
																				GO:1903578	regulation of ATP metabolic process	BP	122	1	0.123188
																				GO:0019079	viral genome replication	BP	122	1	0.123188
																				GO:1903844	regulation of cellular response to transforming growth factor beta stimulus	BP	122	1	0.123188
																				GO:0005179	hormone activity	MF	122	1	0.123188
																				GO:0034762	regulation of transmembrane transport	BP	568	2	0.123238
																				GO:0071621	granulocyte chemotaxis	BP	123	1	0.124135
																				GO:0015405	P-P-bond-hydrolysis-driven transmembrane transporter activity	MF	123	1	0.124135
																				GO:0022603	regulation of anatomical structure morphogenesis	BP	1155	3	0.124198
																				GO:0033674	positive regulation of kinase activity	BP	573	2	0.125023
																				GO:0008637	apoptotic mitochondrial changes	BP	124	1	0.125081
																				GO:1904813	ficolin-1-rich granule lumen	CC	124	1	0.125081
																				GO:0006805	xenobiotic metabolic process	BP	125	1	0.126027
																				GO:0009063	cellular amino acid catabolic process	BP	125	1	0.126027
																				GO:0045471	response to ethanol	BP	125	1	0.126027
																				GO:0015399	primary active transmembrane transporter activity	MF	125	1	0.126027
																				GO:0090101	negative regulation of transmembrane receptor protein serine/threonine kinase signaling pathway	BP	126	1	0.126971
																				GO:0018107	peptidyl-threonine phosphorylation	BP	126	1	0.126971
																				GO:0045667	regulation of osteoblast differentiation	BP	126	1	0.126971
																				GO:0006875	cellular metal ion homeostasis	BP	579	2	0.127174
																				GO:0044424	intracellular part	CC	15063	19	0.127427
																				GO:0032368	regulation of lipid transport	BP	127	1	0.127914
																				GO:0005622	intracellular	CC	15073	19	0.128474
																				GO:0048646	anatomical structure formation involved in morphogenesis	BP	1173	3	0.128511
																				GO:0019955	cytokine binding	MF	128	1	0.128856
																				GO:0016614	oxidoreductase activity, acting on CH-OH group of donors	MF	128	1	0.128856
																				GO:0008150	biological_process	BP	18670	22	0.129332
																				GO:0048598	embryonic morphogenesis	BP	586	2	0.129696
																				GO:0050671	positive regulation of lymphocyte proliferation	BP	130	1	0.130738
																				GO:0046887	positive regulation of hormone secretion	BP	131	1	0.131677
																				GO:0030183	B cell differentiation	BP	131	1	0.131677
																				GO:0032946	positive regulation of mononuclear cell proliferation	BP	131	1	0.131677
																				GO:0005319	lipid transporter activity	MF	131	1	0.131677
																				GO:0042476	odontogenesis	BP	132	1	0.132616
																				GO:0045335	phagocytic vesicle	CC	132	1	0.132616
																				GO:0002705	positive regulation of leukocyte mediated immunity	BP	133	1	0.133553
																				GO:0040017	positive regulation of locomotion	BP	598	2	0.134047
																				GO:0046683	response to organophosphorus	BP	134	1	0.13449
																				GO:0018210	peptidyl-threonine modification	BP	134	1	0.13449
																				GO:0030260	entry into host cell	BP	134	1	0.13449
																				GO:0044409	entry into host	BP	134	1	0.13449
																				GO:0051806	entry into cell of other organism involved in symbiotic interaction	BP	134	1	0.13449
																				GO:0051828	entry into other organism involved in symbiotic interaction	BP	134	1	0.13449
																				GO:0098590	plasma membrane region	CC	1198	3	0.134594
																				GO:0048731	system development	BP	4918	8	0.135014
																				GO:0097190	apoptotic signaling pathway	BP	602	2	0.135505
																				GO:0019838	growth factor binding	MF	137	1	0.137293
																				GO:0008584	male gonad development	BP	138	1	0.138226
																				GO:0019842	vitamin binding	MF	138	1	0.138226
																				GO:0007586	digestion	BP	139	1	0.139158
																				GO:0006720	isoprenoid metabolic process	BP	139	1	0.139158
																				GO:0050715	positive regulation of cytokine secretion	BP	139	1	0.139158
																				GO:0046546	development of primary male sexual characteristics	BP	139	1	0.139158
																				GO:0070665	positive regulation of leukocyte proliferation	BP	139	1	0.139158
																				GO:0002831	regulation of response to biotic stimulus	BP	139	1	0.139158
																				GO:0072073	kidney epithelium development	BP	140	1	0.140088
																				GO:0046330	positive regulation of JNK cascade	BP	140	1	0.140088
																				GO:0050709	negative regulation of protein secretion	BP	141	1	0.141018
																				GO:0006464	cellular protein modification process	BP	4160	7	0.14116
																				GO:0036211	protein modification process	BP	4160	7	0.14116
																				GO:0038127	ERBB signaling pathway	BP	142	1	0.141947
																				GO:1900542	regulation of purine nucleotide metabolic process	BP	142	1	0.141947
																				GO:0106106	cold-induced thermogenesis	BP	143	1	0.142875
																				GO:0120161	regulation of cold-induced thermogenesis	BP	143	1	0.142875
																				GO:0010638	positive regulation of organelle organization	BP	623	2	0.143223
																				GO:0005975	carbohydrate metabolic process	BP	625	2	0.143963
																				GO:0009628	response to abiotic stimulus	BP	1237	3	0.144293
																				GO:0051384	response to glucocorticoid	BP	146	1	0.145652
																				GO:0006140	regulation of nucleotide metabolic process	BP	146	1	0.145652
																				GO:2000241	regulation of reproductive process	BP	146	1	0.145652
																				GO:0002224	toll-like receptor signaling pathway	BP	146	1	0.145652
																				GO:0071236	cellular response to antibiotic	BP	147	1	0.146576
																				GO:0010212	response to ionizing radiation	BP	147	1	0.146576
																				GO:0051592	response to calcium ion	BP	148	1	0.147499
																				GO:0002792	negative regulation of peptide secretion	BP	148	1	0.147499
																				GO:0008643	carbohydrate transport	BP	148	1	0.147499
																				GO:0014074	response to purine-containing compound	BP	149	1	0.148421
																				GO:0008277	regulation of G protein-coupled receptor signaling pathway	BP	149	1	0.148421
																				GO:0051092	positive regulation of NF-kappaB transcription factor activity	BP	149	1	0.148421
																				GO:0006935	chemotaxis	BP	644	2	0.151039
																				GO:0032675	regulation of interleukin-6 production	BP	152	1	0.151182
																				GO:1901135	carbohydrate derivative metabolic process	BP	1266	3	0.151662
																				GO:0042330	taxis	BP	646	2	0.151788
																				GO:0062013	positive regulation of small molecule metabolic process	BP	153	1	0.1521
																				GO:0050729	positive regulation of inflammatory response	BP	153	1	0.1521
																				GO:1901566	organonitrogen compound biosynthetic process	BP	1957	4	0.152603
																				GO:0051347	positive regulation of transferase activity	BP	649	2	0.152913
																				GO:0010770	positive regulation of cell morphogenesis involved in differentiation	BP	154	1	0.153017
																				GO:1990845	adaptive thermogenesis	BP	154	1	0.153017
																				GO:0061025	membrane fusion	BP	154	1	0.153017
																				GO:0009898	cytoplasmic side of plasma membrane	CC	154	1	0.153017
																				GO:1903707	negative regulation of hemopoiesis	BP	155	1	0.153934
																				GO:0030003	cellular cation homeostasis	BP	652	2	0.15404
																				GO:0055065	metal ion homeostasis	BP	653	2	0.154416
																				GO:0045216	cell-cell junction organization	BP	156	1	0.154849
																				GO:0030856	regulation of epithelial cell differentiation	BP	156	1	0.154849
																				GO:0042129	regulation of T cell proliferation	BP	156	1	0.154849
																				GO:0043271	negative regulation of ion transport	BP	157	1	0.155764
																				GO:1905952	regulation of lipid localization	BP	157	1	0.155764
																				GO:0060429	epithelium development	BP	1291	3	0.158117
																				GO:0021915	neural tube development	BP	160	1	0.158502
																				GO:1903305	regulation of regulated secretory pathway	BP	160	1	0.158502
																				GO:0007519	skeletal muscle tissue development	BP	160	1	0.158502
																				GO:0006754	ATP biosynthetic process	BP	160	1	0.158502
																				GO:0046661	male sex differentiation	BP	160	1	0.158502
																				GO:0030203	glycosaminoglycan metabolic process	BP	160	1	0.158502
																				GO:0006873	cellular ion homeostasis	BP	665	2	0.158944
																				GO:0006915	apoptotic process	BP	1988	4	0.158992
																				GO:0032635	interleukin-6 production	BP	161	1	0.159412
																				GO:0051336	regulation of hydrolase activity	BP	1297	3	0.15968
																				GO:0031960	response to corticosteroid	BP	162	1	0.160322
																				GO:0031214	biomineral tissue development	BP	163	1	0.161231
																				GO:0005201	extracellular matrix structural constituent	MF	163	1	0.161231
																				GO:0061061	muscle structure development	BP	672	2	0.161598
																				GO:0007088	regulation of mitotic nuclear division	BP	164	1	0.162139
																				GO:0002764	immune response-regulating signaling pathway	BP	675	2	0.162738
																				GO:0050680	negative regulation of epithelial cell proliferation	BP	165	1	0.163046
																				GO:0071695	anatomical structure maturation	BP	165	1	0.163046
																				GO:2001242	regulation of intrinsic apoptotic signaling pathway	BP	165	1	0.163046
																				GO:0019897	extrinsic component of plasma membrane	CC	165	1	0.163046
																				GO:0003006	developmental process involved in reproduction	BP	676	2	0.163119
																				GO:0090288	negative regulation of cellular response to growth factor stimulus	BP	166	1	0.163952
																				GO:0035051	cardiocyte differentiation	BP	167	1	0.164857
																				GO:0050806	positive regulation of synaptic transmission	BP	168	1	0.165761
																				GO:0008104	protein localization	BP	2765	5	0.166297
																				GO:0050728	negative regulation of inflammatory response	BP	169	1	0.166664
																				GO:0060538	skeletal muscle organ development	BP	169	1	0.166664
																				GO:0048660	regulation of smooth muscle cell proliferation	BP	169	1	0.166664
																				GO:0038095	Fc-epsilon receptor signaling pathway	BP	169	1	0.166664
																				GO:0140056	organelle localization by membrane tethering	BP	169	1	0.166664
																				GO:0031225	anchored component of membrane	CC	170	1	0.167566
																				GO:0030674	protein binding, bridging	MF	170	1	0.167566
																				GO:0043168	anion binding	MF	2773	5	0.16775
																				GO:0010634	positive regulation of epithelial cell migration	BP	171	1	0.168468
																				GO:0009206	purine ribonucleoside triphosphate biosynthetic process	BP	171	1	0.168468
																				GO:0043901	negative regulation of multi-organism process	BP	171	1	0.168468
																				GO:0048659	smooth muscle cell proliferation	BP	171	1	0.168468
																				GO:0046983	protein dimerization activity	MF	1331	3	0.168634
																				GO:0030155	regulation of cell adhesion	BP	691	2	0.168846
																				GO:0009145	purine nucleoside triphosphate biosynthetic process	BP	172	1	0.169368
																				GO:0030324	lung development	BP	172	1	0.169368
																				GO:0032874	positive regulation of stress-activated MAPK cascade	BP	172	1	0.169368
																				GO:0001659	temperature homeostasis	BP	173	1	0.170268
																				GO:0070304	positive regulation of stress-activated protein kinase signaling cascade	BP	173	1	0.170268
																				GO:0043412	macromolecule modification	BP	4373	7	0.171642
																				GO:0051223	regulation of protein transport	BP	699	2	0.171916
																				GO:0004866	endopeptidase inhibitor activity	MF	175	1	0.172064
																				GO:0032870	cellular response to hormone stimulus	BP	701	2	0.172685
																				GO:0030323	respiratory tube development	BP	176	1	0.172961
																				GO:0001936	regulation of endothelial cell proliferation	BP	176	1	0.172961
																				GO:0051897	positive regulation of protein kinase B signaling	BP	176	1	0.172961
																				GO:0009201	ribonucleoside triphosphate biosynthetic process	BP	177	1	0.173856
																				GO:0001959	regulation of cytokine-mediated signaling pathway	BP	177	1	0.173856
																				GO:0071363	cellular response to growth factor stimulus	BP	706	2	0.174611
																				GO:2001257	regulation of cation channel activity	BP	178	1	0.174751
																				GO:0005741	mitochondrial outer membrane	CC	178	1	0.174751
																				GO:0098562	cytoplasmic side of membrane	CC	178	1	0.174751
																				GO:2001235	positive regulation of apoptotic signaling pathway	BP	179	1	0.175645
																				GO:0070613	regulation of protein processing	BP	180	1	0.176538
																				GO:0071466	cellular response to xenobiotic stimulus	BP	180	1	0.176538
																				GO:0071346	cellular response to interferon-gamma	BP	180	1	0.176538
																				GO:0019887	protein kinase regulator activity	MF	180	1	0.176538
																				GO:0044425	membrane part	CC	6939	10	0.176901
																				GO:0019439	aromatic compound catabolic process	BP	712	2	0.176927
																				GO:1903317	regulation of protein maturation	BP	182	1	0.178321
																				GO:0008217	regulation of blood pressure	BP	182	1	0.178321
																				GO:0030414	peptidase inhibitor activity	MF	182	1	0.178321
																				GO:0061135	endopeptidase regulator activity	MF	182	1	0.178321
																				GO:0098588	bounding membrane of organelle	CC	2081	4	0.178789
																				GO:0043123	positive regulation of I-kappaB kinase/NF-kappaB signaling	BP	183	1	0.179212
																				GO:0009127	purine nucleoside monophosphate biosynthetic process	BP	183	1	0.179212
																				GO:0009168	purine ribonucleoside monophosphate biosynthetic process	BP	183	1	0.179212
																				GO:0042098	T cell proliferation	BP	184	1	0.180101
																				GO:0046328	regulation of JNK cascade	BP	185	1	0.180989
																				GO:0101002	ficolin-1-rich granule	CC	185	1	0.180989
																				GO:0022900	electron transport chain	BP	186	1	0.181877
																				GO:1905475	regulation of protein localization to membrane	BP	187	1	0.182763
																				GO:0008022	protein C-terminus binding	MF	187	1	0.182763
																				GO:0016829	lyase activity	MF	187	1	0.182763
																				GO:0044267	cellular protein metabolic process	BP	5276	8	0.183047
																				GO:0090087	regulation of peptide transport	BP	729	2	0.183518
																				GO:0009142	nucleoside triphosphate biosynthetic process	BP	188	1	0.183649
																				GO:0043902	positive regulation of multi-organism process	BP	188	1	0.183649
																				GO:0051783	regulation of nuclear division	BP	188	1	0.183649
																				GO:0055080	cation homeostasis	BP	730	2	0.183907
																				GO:0071495	cellular response to endogenous stimulus	BP	1393	3	0.185358
																				GO:0071248	cellular response to metal ion	BP	190	1	0.185417
																				GO:0060759	regulation of response to cytokine stimulus	BP	190	1	0.185417
																				GO:0070848	response to growth factor	BP	736	2	0.186244
																				GO:0001935	endothelial cell proliferation	BP	191	1	0.1863
																				GO:0097223	sperm part	CC	191	1	0.1863
																				GO:0007565	female pregnancy	BP	192	1	0.187182
																				GO:0051224	negative regulation of protein transport	BP	193	1	0.188063
																				GO:0030027	lamellipodium	CC	193	1	0.188063
																				GO:0098771	inorganic ion homeostasis	BP	741	2	0.188195
																				GO:1902115	regulation of organelle assembly	BP	194	1	0.188943
																				GO:0008152	metabolic process	BP	12552	16	0.189248
																				GO:1901361	organic cyclic compound catabolic process	BP	745	2	0.189759
																				GO:0012501	programmed cell death	BP	2132	4	0.190023
																				GO:0070201	regulation of establishment of protein localization	BP	746	2	0.19015
																				GO:0009156	ribonucleoside monophosphate biosynthetic process	BP	197	1	0.191578
																				GO:1904950	negative regulation of establishment of protein localization	BP	197	1	0.191578
																				GO:0002221	pattern recognition receptor signaling pathway	BP	197	1	0.191578
																				GO:0060541	respiratory system development	BP	198	1	0.192455
																				GO:0034341	response to interferon-gamma	BP	199	1	0.193331
																				GO:0016052	carbohydrate catabolic process	BP	199	1	0.193331
																				GO:0007179	transforming growth factor beta receptor signaling pathway	BP	199	1	0.193331
																				GO:0045596	negative regulation of cell differentiation	BP	755	2	0.193676
																				GO:0043085	positive regulation of catalytic activity	BP	1424	3	0.193898
																				GO:0002703	regulation of leukocyte mediated immunity	BP	201	1	0.195079
																				GO:0031968	organelle outer membrane	CC	201	1	0.195079
																				GO:0022414	reproductive process	BP	1429	3	0.195286
																				GO:2000026	regulation of multicellular organismal development	BP	2157	4	0.195621
																				GO:0050870	positive regulation of T cell activation	BP	202	1	0.195952
																				GO:0000003	reproduction	BP	1432	3	0.19612
																				GO:0043167	ion binding	MF	6218	9	0.196426
																				GO:0030278	regulation of ossification	BP	203	1	0.196824
																				GO:0019867	outer membrane	CC	203	1	0.196824
																				GO:0140096	catalytic activity, acting on a protein	MF	2165	4	0.197424
																				GO:0045766	positive regulation of angiogenesis	BP	204	1	0.197695
																				GO:0050679	positive regulation of epithelial cell proliferation	BP	206	1	0.199434
																				GO:1901575	organic substance catabolic process	BP	2175	4	0.199687
																				GO:0002064	epithelial cell development	BP	207	1	0.200303
																				GO:0019207	kinase regulator activity	MF	207	1	0.200303
																				GO:0005198	structural molecule activity	MF	772	2	0.200363
																				GO:1901137	carbohydrate derivative biosynthetic process	BP	773	2	0.200757
																				GO:0009124	nucleoside monophosphate biosynthetic process	BP	208	1	0.20117
																				GO:0050670	regulation of lymphocyte proliferation	BP	208	1	0.20117
																				GO:0098858	actin-based cell projection	CC	208	1	0.20117
																				GO:0030855	epithelial cell differentiation	BP	775	2	0.201546
																				GO:0071229	cellular response to acid chemical	BP	209	1	0.202037
																				GO:0051216	cartilage development	BP	209	1	0.202037
																				GO:0032944	regulation of mononuclear cell proliferation	BP	209	1	0.202037
																				GO:0051701	interaction with host	BP	209	1	0.202037
																				GO:1903531	negative regulation of secretion by cell	BP	211	1	0.203767
																				GO:0036464	cytoplasmic ribonucleoprotein granule	CC	212	1	0.204631
																				GO:0015893	drug transport	BP	214	1	0.206356
																				GO:0007254	JNK cascade	BP	214	1	0.206356
																				GO:0010810	regulation of cell-substrate adhesion	BP	215	1	0.207218
																				GO:0070374	positive regulation of ERK1 and ERK2 cascade	BP	215	1	0.207218
																				GO:0043281	regulation of cysteine-type endopeptidase activity involved in apoptotic process	BP	215	1	0.207218
																				GO:0002699	positive regulation of immune effector process	BP	216	1	0.208078
																				GO:0045859	regulation of protein kinase activity	BP	792	2	0.208271
																				GO:0043393	regulation of protein binding	BP	217	1	0.208937
																				GO:0071241	cellular response to inorganic substance	BP	217	1	0.208937
																				GO:0060348	bone development	BP	217	1	0.208937
																				GO:0016323	basolateral plasma membrane	CC	217	1	0.208937
																				GO:0065009	regulation of molecular function	BP	2989	5	0.209017
																				GO:0010001	glial cell differentiation	BP	218	1	0.209796
																				GO:0019722	calcium-mediated signaling	BP	218	1	0.209796
																				GO:1903039	positive regulation of leukocyte cell-cell adhesion	BP	218	1	0.209796
																				GO:0006807	nitrogen compound metabolic process	BP	10812	14	0.210437
																				GO:0007584	response to nutrient	BP	219	1	0.210653
																				GO:0061134	peptidase regulator activity	MF	219	1	0.210653
																				GO:0002526	acute inflammatory response	BP	220	1	0.21151
																				GO:0044706	multi-multicellular organism process	BP	222	1	0.213221
																				GO:0070663	regulation of leukocyte proliferation	BP	222	1	0.213221
																				GO:0045444	fat cell differentiation	BP	223	1	0.214075
																				GO:0035770	ribonucleoprotein granule	CC	223	1	0.214075
																				GO:0097191	extrinsic apoptotic signaling pathway	BP	224	1	0.214928
																				GO:0030595	leukocyte chemotaxis	BP	224	1	0.214928
																				GO:0007160	cell-matrix adhesion	BP	225	1	0.215781
																				GO:0001649	osteoblast differentiation	BP	225	1	0.215781
																				GO:0050801	ion homeostasis	BP	811	2	0.215819
																				GO:0055082	cellular chemical homeostasis	BP	812	2	0.216218
																				GO:0043086	negative regulation of catalytic activity	BP	815	2	0.217413
																				GO:0001894	tissue homeostasis	BP	227	1	0.217483
																				GO:0005515	protein binding	MF	11807	15	0.217497
																				GO:0008270	zinc ion binding	MF	816	2	0.217811
																				GO:0006897	endocytosis	BP	820	2	0.219406
																				GO:1904018	positive regulation of vasculature development	BP	230	1	0.220029
																				GO:2001234	negative regulation of apoptotic signaling pathway	BP	230	1	0.220029
																				GO:0008219	cell death	BP	2264	4	0.220207
																				GO:0042445	hormone metabolic process	BP	232	1	0.221722
																				GO:0097305	response to alcohol	BP	233	1	0.222568
																				GO:0016032	viral process	BP	833	2	0.224599
																				GO:0043122	regulation of I-kappaB kinase/NF-kappaB signaling	BP	237	1	0.22594
																				GO:0031669	cellular response to nutrient levels	BP	237	1	0.22594
																				GO:0032872	regulation of stress-activated MAPK cascade	BP	237	1	0.22594
																				GO:0060090	molecular adaptor activity	MF	237	1	0.22594
																				GO:0051048	negative regulation of secretion	BP	238	1	0.226781
																				GO:0019222	regulation of metabolic process	BP	7303	10	0.227469
																				GO:0031348	negative regulation of defense response	BP	239	1	0.227621
																				GO:0048705	skeletal system morphogenesis	BP	239	1	0.227621
																				GO:0070302	regulation of stress-activated protein kinase signaling cascade	BP	239	1	0.227621
																				GO:0033002	muscle cell proliferation	BP	239	1	0.227621
																				GO:0038093	Fc receptor signaling pathway	BP	241	1	0.229298
																				GO:0090092	regulation of transmembrane receptor protein serine/threonine kinase signaling pathway	BP	241	1	0.229298
																				GO:0051896	regulation of protein kinase B signaling	BP	244	1	0.231808
																				GO:0005794	Golgi apparatus	CC	1560	3	0.232554
																				GO:0097237	cellular response to toxic substance	BP	247	1	0.23431
																				GO:0050790	regulation of catalytic activity	BP	2328	4	0.235356
																				GO:0071560	cellular response to transforming growth factor beta stimulus	BP	249	1	0.235974
																				GO:0045637	regulation of myeloid cell differentiation	BP	251	1	0.237634
																				GO:0043549	regulation of kinase activity	BP	870	2	0.239441
																				GO:0071559	response to transforming growth factor beta	BP	255	1	0.240944
																				GO:0022409	positive regulation of cell-cell adhesion	BP	255	1	0.240944
																				GO:0055085	transmembrane transport	BP	1598	3	0.243648
																				GO:0072659	protein localization to plasma membrane	BP	260	1	0.245062
																				GO:0032412	regulation of ion transmembrane transporter activity	BP	260	1	0.245062
																				GO:0051091	positive regulation of DNA-binding transcription factor activity	BP	261	1	0.245883
																				GO:0140014	mitotic nuclear division	BP	264	1	0.248341
																				GO:0046883	regulation of hormone secretion	BP	266	1	0.249976
																				GO:0005102	signaling receptor binding	MF	1624	3	0.251299
																				GO:0050714	positive regulation of protein secretion	BP	268	1	0.251607
																				GO:0022898	regulation of transmembrane transporter activity	BP	268	1	0.251607
																				GO:0007249	I-kappaB kinase/NF-kappaB signaling	BP	269	1	0.252421
																				GO:0043491	protein kinase B signaling	BP	269	1	0.252421
																				GO:1901617	organic hydroxy compound biosynthetic process	BP	271	1	0.254047
																				GO:0030246	carbohydrate binding	MF	271	1	0.254047
																				GO:0043227	membrane-bounded organelle	CC	13019	16	0.25437
																				GO:0046651	lymphocyte proliferation	BP	272	1	0.254859
																				GO:1902105	regulation of leukocyte differentiation	BP	272	1	0.254859
																				GO:0061448	connective tissue development	BP	273	1	0.25567
																				GO:0043066	negative regulation of apoptotic process	BP	911	2	0.255971
																				GO:0032943	mononuclear cell proliferation	BP	274	1	0.25648
																				GO:0016054	organic acid catabolic process	BP	275	1	0.257289
																				GO:0046395	carboxylic acid catabolic process	BP	275	1	0.257289
																				GO:0071704	organic substance metabolic process	BP	12093	15	0.258605
																				GO:0009152	purine ribonucleotide biosynthetic process	BP	280	1	0.261322
																				GO:0030100	regulation of endocytosis	BP	281	1	0.262126
																				GO:0032409	regulation of transporter activity	BP	283	1	0.263732
																				GO:0043069	negative regulation of programmed cell death	BP	932	2	0.26446
																				GO:0021700	developmental maturation	BP	284	1	0.264534
																				GO:0042623	ATPase activity, coupled	MF	284	1	0.264534
																				GO:0015980	energy derivation by oxidation of organic compounds	BP	285	1	0.265335
																				GO:0051403	stress-activated MAPK cascade	BP	286	1	0.266135
																				GO:0002793	positive regulation of peptide secretion	BP	288	1	0.267732
																				GO:0097193	intrinsic apoptotic signaling pathway	BP	289	1	0.26853
																				GO:0034330	cell junction organization	BP	290	1	0.269327
																				GO:0042063	gliogenesis	BP	290	1	0.269327
																				GO:0098657	import into cell	BP	945	2	0.269719
																				GO:0010632	regulation of epithelial cell migration	BP	291	1	0.270122
																				GO:0009410	response to xenobiotic stimulus	BP	292	1	0.270917
																				GO:0090287	regulation of cellular response to growth factor stimulus	BP	292	1	0.270917
																				GO:0009260	ribonucleotide biosynthetic process	BP	293	1	0.271712
																				GO:0060284	regulation of cell development	BP	953	2	0.272957
																				GO:0048511	rhythmic process	BP	295	1	0.273298
																				GO:0019898	extrinsic component of membrane	CC	295	1	0.273298
																				GO:0051172	negative regulation of nitrogen compound metabolic process	BP	2488	4	0.274431
																				GO:0070661	leukocyte proliferation	BP	298	1	0.27567
																				GO:0002758	innate immune response-activating signal transduction	BP	298	1	0.27567
																				GO:0070372	regulation of ERK1 and ERK2 cascade	BP	300	1	0.277248
																				GO:0006164	purine nucleotide biosynthetic process	BP	300	1	0.277248
																				GO:0046390	ribose phosphate biosynthetic process	BP	300	1	0.277248
																				GO:0010605	negative regulation of macromolecule metabolic process	BP	3314	5	0.27729
																				GO:0010769	regulation of cell morphogenesis involved in differentiation	BP	301	1	0.278036
																				GO:0036094	small molecule binding	MF	2503	4	0.278169
																				GO:0030139	endocytic vesicle	CC	303	1	0.279608
																				GO:0019725	cellular homeostasis	BP	970	2	0.27984
																				GO:1903037	regulation of leukocyte cell-cell adhesion	BP	304	1	0.280394
																				GO:0051338	regulation of transferase activity	BP	972	2	0.28065
																				GO:0046034	ATP metabolic process	BP	305	1	0.281178
																				GO:0044237	cellular metabolic process	BP	11301	14	0.281343
																				GO:0044431	Golgi apparatus part	CC	974	2	0.28146
																				GO:0042113	B cell activation	BP	310	1	0.285088
																				GO:0060255	regulation of macromolecule metabolic process	BP	6785	9	0.285359
																				GO:0046872	metal ion binding	MF	4189	6	0.285472
																				GO:1990778	protein localization to cell periphery	BP	311	1	0.285867
																				GO:0046879	hormone secretion	BP	312	1	0.286646
																				GO:0072522	purine-containing compound biosynthetic process	BP	313	1	0.287424
																				GO:0016020	membrane	CC	9495	12	0.287727
																				GO:0050863	regulation of T cell activation	BP	314	1	0.288201
																				GO:0045597	positive regulation of cell differentiation	BP	991	2	0.288343
																				GO:0031098	stress-activated protein kinase signaling cascade	BP	315	1	0.288977
																				GO:0006898	receptor-mediated endocytosis	BP	316	1	0.289752
																				GO:0070371	ERK1 and ERK2 cascade	BP	317	1	0.290527
																				GO:0002218	activation of innate immune response	BP	319	1	0.292074
																				GO:0009914	hormone transport	BP	322	1	0.294388
																				GO:0032103	positive regulation of response to external stimulus	BP	323	1	0.295158
																				GO:0009615	response to virus	BP	326	1	0.297462
																				GO:0019538	protein metabolic process	BP	5986	8	0.299381
																				GO:0051235	maintenance of location	BP	330	1	0.300524
																				GO:0045296	cadherin binding	MF	331	1	0.301287
																				GO:0060548	negative regulation of cell death	BP	1023	2	0.301293
																				GO:0032147	activation of protein kinase activity	BP	333	1	0.302811
																				GO:0051251	positive regulation of lymphocyte activation	BP	334	1	0.303572
																				GO:0071902	positive regulation of protein serine/threonine kinase activity	BP	334	1	0.303572
																				GO:0043169	cation binding	MF	4279	6	0.303732
																				GO:0009205	purine ribonucleoside triphosphate metabolic process	BP	335	1	0.304333
																				GO:0060070	canonical Wnt signaling pathway	BP	335	1	0.304333
																				GO:0007596	blood coagulation	BP	336	1	0.305092
																				GO:0009167	purine ribonucleoside monophosphate metabolic process	BP	340	1	0.308122
																				GO:0007599	hemostasis	BP	341	1	0.308877
																				GO:0009126	purine nucleoside monophosphate metabolic process	BP	341	1	0.308877
																				GO:0009199	ribonucleoside triphosphate metabolic process	BP	341	1	0.308877
																				GO:0050817	coagulation	BP	342	1	0.309632
																				GO:1904062	regulation of cation transmembrane transport	BP	342	1	0.309632
																				GO:0009144	purine nucleoside triphosphate metabolic process	BP	342	1	0.309632
																				GO:0001101	response to acid chemical	BP	343	1	0.310386
																				GO:0051093	negative regulation of developmental process	BP	1046	2	0.310588
																				GO:0010721	negative regulation of cell development	BP	344	1	0.311139
																				GO:0007178	transmembrane receptor protein serine/threonine kinase signaling pathway	BP	349	1	0.314893
																				GO:0031324	negative regulation of cellular metabolic process	BP	2650	4	0.31533
																				GO:0005769	early endosome	CC	350	1	0.315641
																				GO:0010631	epithelial cell migration	BP	351	1	0.316389
																				GO:0030098	lymphocyte differentiation	BP	353	1	0.317882
																				GO:0090132	epithelium migration	BP	354	1	0.318627
																				GO:0009161	ribonucleoside monophosphate metabolic process	BP	354	1	0.318627
																				GO:0005765	lysosomal membrane	CC	354	1	0.318627
																				GO:0098852	lytic vacuole membrane	CC	355	1	0.319372
																				GO:0009887	animal organ morphogenesis	BP	1068	2	0.319465
																				GO:0022412	cellular process involved in reproduction in multicellular organism	BP	357	1	0.320858
																				GO:0001666	response to hypoxia	BP	359	1	0.322342
																				GO:0090130	tissue migration	BP	360	1	0.323083
																				GO:0009141	nucleoside triphosphate metabolic process	BP	362	1	0.324562
																				GO:0022804	active transmembrane transporter activity	MF	362	1	0.324562
																				GO:0019752	carboxylic acid metabolic process	BP	1083	2	0.325507
																				GO:0040012	regulation of locomotion	BP	1084	2	0.32591
																				GO:0045595	regulation of cell differentiation	BP	1878	3	0.327818
																				GO:0032991	protein-containing complex	CC	6151	8	0.329537
																				GO:0035690	cellular response to drug	BP	369	1	0.329714
																				GO:0009892	negative regulation of metabolic process	BP	3549	5	0.329948
																				GO:0036293	response to decreased oxygen levels	BP	370	1	0.330447
																				GO:0006790	sulfur compound metabolic process	BP	372	1	0.33191
																				GO:0009123	nucleoside monophosphate metabolic process	BP	375	1	0.3341
																				GO:0004857	enzyme inhibitor activity	MF	375	1	0.3341
																				GO:0050678	regulation of epithelial cell proliferation	BP	378	1	0.336283
																				GO:0045089	positive regulation of innate immune response	BP	381	1	0.338459
																				GO:0045765	regulation of angiogenesis	BP	383	1	0.339906
																				GO:0031346	positive regulation of cell projection organization	BP	383	1	0.339906
																				GO:0045177	apical part of cell	CC	384	1	0.340628
																				GO:0016887	ATPase activity	MF	384	1	0.340628
																				GO:0048545	response to steroid hormone	BP	385	1	0.34135
																				GO:0009165	nucleotide biosynthetic process	BP	386	1	0.34207
																				GO:1901293	nucleoside phosphate biosynthetic process	BP	390	1	0.344946
																				GO:0014706	striated muscle tissue development	BP	390	1	0.344946
																				GO:0030133	transport vesicle	CC	392	1	0.34638
																				GO:0070482	response to oxygen levels	BP	394	1	0.34781
																				GO:0032989	cellular component morphogenesis	BP	1143	2	0.349567
																				GO:0001503	ossification	BP	398	1	0.350662
																				GO:0022407	regulation of cell-cell adhesion	BP	403	1	0.35421
																				GO:0031252	cell leading edge	CC	403	1	0.35421
																				GO:0043547	positive regulation of GTPase activity	BP	405	1	0.355624
																				GO:0005925	focal adhesion	CC	405	1	0.355624
																				GO:0065003	protein-containing complex assembly	BP	1971	3	0.356226
																				GO:2001233	regulation of apoptotic signaling pathway	BP	406	1	0.356329
																				GO:0000280	nuclear division	BP	407	1	0.357035
																				GO:0044092	negative regulation of molecular function	BP	1162	2	0.357142
																				GO:0060537	muscle tissue development	BP	408	1	0.357739
																				GO:0005924	cell-substrate adherens junction	CC	408	1	0.357739
																				GO:0031323	regulation of cellular metabolic process	BP	6305	8	0.358422
																				GO:0007517	muscle organ development	BP	410	1	0.359146
																				GO:0072359	circulatory system development	BP	1169	2	0.359927
																				GO:0005774	vacuolar membrane	CC	412	1	0.360549
																				GO:0030055	cell-substrate junction	CC	412	1	0.360549
																				GO:0043436	oxoacid metabolic process	BP	1172	2	0.361119
																				GO:0015031	protein transport	BP	1998	3	0.364474
																				GO:0051222	positive regulation of protein transport	BP	418	1	0.364743
																				GO:0034220	ion transmembrane transport	BP	1182	2	0.365088
																				GO:0048878	chemical homeostasis	BP	1187	2	0.36707
																				GO:1901342	regulation of vasculature development	BP	422	1	0.367524
																				GO:0010628	positive regulation of gene expression	BP	2012	3	0.368749
																				GO:0006082	organic acid metabolic process	BP	1192	2	0.36905
																				GO:0001933	negative regulation of protein phosphorylation	BP	429	1	0.372362
																				GO:0051090	regulation of DNA-binding transcription factor activity	BP	432	1	0.374425
																				GO:0015833	peptide transport	BP	2034	3	0.375462
																				GO:0042391	regulation of membrane potential	BP	434	1	0.375797
																				GO:0050673	epithelial cell proliferation	BP	434	1	0.375797
																				GO:0050804	modulation of chemical synaptic transmission	BP	436	1	0.377166
																				GO:0060249	anatomical structure homeostasis	BP	437	1	0.377849
																				GO:0099177	regulation of trans-synaptic signaling	BP	437	1	0.377849
																				GO:0010256	endomembrane system organization	BP	438	1	0.378532
																				GO:0019932	second-messenger-mediated signaling	BP	439	1	0.379214
																				GO:0031090	organelle membrane	CC	2903	4	0.380674
																				GO:0044282	small molecule catabolic process	BP	445	1	0.38329
																				GO:0042886	amide transport	BP	2065	3	0.384909
																				GO:0009314	response to radiation	BP	448	1	0.385319
																				GO:0048285	organelle fission	BP	449	1	0.385994
																				GO:0033554	cellular response to stress	BP	2069	3	0.386127
																				GO:0045088	regulation of innate immune response	BP	452	1	0.388014
																				GO:1904951	positive regulation of establishment of protein localization	BP	456	1	0.390698
																				GO:0002697	regulation of immune effector process	BP	458	1	0.392035
																				GO:0062012	regulation of small molecule metabolic process	BP	459	1	0.392703
																				GO:0001667	ameboidal-type cell migration	BP	461	1	0.394036
																				GO:0023061	signal release	BP	462	1	0.394702
																				GO:0046394	carboxylic acid biosynthetic process	BP	462	1	0.394702
																				GO:0002683	negative regulation of immune system process	BP	463	1	0.395367
																				GO:0016053	organic acid biosynthetic process	BP	463	1	0.395367
																				GO:0001819	positive regulation of cytokine production	BP	464	1	0.396031
																				GO:0042110	T cell activation	BP	464	1	0.396031
																				GO:0042326	negative regulation of phosphorylation	BP	468	1	0.398681
																				GO:0045184	establishment of protein localization	BP	2113	3	0.399499
																				GO:0044281	small molecule metabolic process	BP	2115	3	0.400106
																				GO:1903706	regulation of hemopoiesis	BP	475	1	0.403292
																				GO:0043087	regulation of GTPase activity	BP	479	1	0.405912
																				GO:0048018	receptor ligand activity	MF	482	1	0.40787
																				GO:0034765	regulation of ion transmembrane transport	BP	483	1	0.408521
																				GO:0022604	regulation of cell morphogenesis	BP	484	1	0.409171
																				GO:0051249	regulation of lymphocyte activation	BP	485	1	0.409821
																				GO:0050878	regulation of body fluid levels	BP	501	1	0.420125
																				GO:0046982	protein heterodimerization activity	MF	505	1	0.422674
																				GO:0002768	immune response-regulating cell surface receptor signaling pathway	BP	506	1	0.42331
																				GO:0015629	actin cytoskeleton	CC	507	1	0.423945
																				GO:0071900	regulation of protein serine/threonine kinase activity	BP	515	1	0.429
																				GO:0005575	cellular_component	CC	19717	22	0.429849
																				GO:0019899	enzyme binding	MF	2217	3	0.43088
																				GO:0016055	Wnt signaling pathway	BP	519	1	0.431512
																				GO:0008047	enzyme activator activity	MF	519	1	0.431512
																				GO:0198738	cell-cell signaling by wnt	BP	521	1	0.432764
																				GO:1903827	regulation of cellular protein localization	BP	524	1	0.434637
																				GO:0022607	cellular component assembly	BP	3116	4	0.435897
																				GO:0030182	neuron differentiation	BP	1365	2	0.436131
																				GO:0030545	receptor regulator activity	MF	530	1	0.438365
																				GO:0044089	positive regulation of cellular component biogenesis	BP	540	1	0.444527
																				GO:0008015	blood circulation	BP	541	1	0.44514
																				GO:0009150	purine ribonucleotide metabolic process	BP	542	1	0.445752
																				GO:0030335	positive regulation of cell migration	BP	544	1	0.446974
																				GO:0022402	cell cycle process	BP	1394	2	0.447058
																				GO:0009057	macromolecule catabolic process	BP	1396	2	0.447808
																				GO:0005912	adherens junction	CC	546	1	0.448193
																				GO:0048519	negative regulation of biological process	BP	5869	7	0.449509
																				GO:0003013	circulatory system process	BP	551	1	0.451231
																				GO:0010720	positive regulation of cell development	BP	553	1	0.452441
																				GO:0043933	protein-containing complex subunit organization	BP	2290	3	0.452649
																				GO:0043226	organelle	CC	14144	16	0.454609
																				GO:0009259	ribonucleotide metabolic process	BP	557	1	0.454854
																				GO:0070161	anchoring junction	CC	562	1	0.457857
																				GO:1902532	negative regulation of intracellular signal transduction	BP	566	1	0.460247
																				GO:2000147	positive regulation of cell motility	BP	568	1	0.461439
																				GO:0044248	cellular catabolic process	BP	2324	3	0.462699
																				GO:0043170	macromolecule metabolic process	BP	10507	12	0.463886
																				GO:0006163	purine nucleotide metabolic process	BP	575	1	0.465589
																				GO:0019693	ribose phosphate metabolic process	BP	577	1	0.466769
																				GO:0043229	intracellular organelle	CC	13294	15	0.469048
																				GO:0051272	positive regulation of cellular component movement	BP	585	1	0.471465
																				GO:0045936	negative regulation of phosphate metabolic process	BP	586	1	0.47205
																				GO:0001525	angiogenesis	BP	587	1	0.472633
																				GO:0010563	negative regulation of phosphorus metabolic process	BP	587	1	0.472633
																				GO:0007507	heart development	BP	587	1	0.472633
																				GO:0007610	behavior	BP	594	1	0.476701
																				GO:0071705	nitrogen compound transport	BP	2374	3	0.477362
																				GO:0010468	regulation of gene expression	BP	5127	6	0.484299
																				GO:0044057	regulation of system process	BP	613	1	0.487593
																				GO:0072521	purine-containing compound metabolic process	BP	613	1	0.487593
																				GO:0051171	regulation of nitrogen compound metabolic process	BP	6063	7	0.488982
																				GO:0031400	negative regulation of protein modification process	BP	618	1	0.490423
																				GO:0072657	protein localization to membrane	BP	621	1	0.492113
																				GO:1905114	cell surface receptor signaling pathway involved in cell-cell signaling	BP	622	1	0.492676
																				GO:0048699	generation of neurons	BP	1524	2	0.494705
																				GO:0043009	chordate embryonic development	BP	627	1	0.495479
																				GO:0044085	cellular component biogenesis	BP	3355	4	0.49681
																				GO:0030030	cell projection organization	BP	1534	2	0.498274
																				GO:0002757	immune response-activating signal transduction	BP	641	1	0.503249
																				GO:0009792	embryo development ending in birth or egg hatching	BP	644	1	0.5049
																				GO:0032787	monocarboxylic acid metabolic process	BP	651	1	0.50873
																				GO:0019901	protein kinase binding	MF	651	1	0.50873
																				GO:0007346	regulation of mitotic cell cycle	BP	656	1	0.511448
																				GO:0005739	mitochondrion	CC	1573	2	0.512054
																				GO:0042981	regulation of apoptotic process	BP	1587	2	0.516947
																				GO:0043065	positive regulation of apoptotic process	BP	672	1	0.520051
																				GO:0080090	regulation of primary metabolic process	BP	6233	7	0.523269
																				GO:0043068	positive regulation of programmed cell death	BP	680	1	0.524298
																				GO:0048514	blood vessel morphogenesis	BP	681	1	0.524826
																				GO:0031344	regulation of cell projection organization	BP	682	1	0.525354
																				GO:0043067	regulation of programmed cell death	BP	1613	2	0.525954
																				GO:0032990	cell part morphogenesis	BP	685	1	0.526934
																				GO:0022008	neurogenesis	BP	1623	2	0.529392
																				GO:0046700	heterocycle catabolic process	BP	695	1	0.532164
																				GO:0044270	cellular nitrogen compound catabolic process	BP	696	1	0.532684
																				GO:0031966	mitochondrial membrane	CC	698	1	0.533723
																				GO:0043269	regulation of ion transport	BP	699	1	0.534241
																				GO:0090407	organophosphate biosynthetic process	BP	699	1	0.534241
																				GO:0051640	organelle localization	BP	701	1	0.535276
																				GO:0007268	chemical synaptic transmission	BP	703	1	0.536309
																				GO:0098916	anterograde trans-synaptic signaling	BP	703	1	0.536309
																				GO:0007267	cell-cell signaling	BP	1650	2	0.538596
																				GO:0009117	nucleotide metabolic process	BP	709	1	0.539394
																				GO:0099537	trans-synaptic signaling	BP	711	1	0.540419
																				GO:0006753	nucleoside phosphate metabolic process	BP	716	1	0.542969
																				GO:0099536	synaptic signaling	BP	717	1	0.543478
																				GO:0002253	activation of immune response	BP	724	1	0.547022
																				GO:0010942	positive regulation of cell death	BP	730	1	0.55004
																				GO:0019900	kinase binding	MF	730	1	0.55004
																				GO:0007420	brain development	BP	733	1	0.551541
																				GO:0046649	lymphocyte activation	BP	733	1	0.551541
																				GO:0008289	lipid binding	MF	734	1	0.552041
																				GO:0006811	ion transport	BP	1696	2	0.554018
																				GO:0005740	mitochondrial envelope	CC	739	1	0.55453
																				GO:0000904	cell morphogenesis involved in differentiation	BP	744	1	0.557006
																				GO:0080135	regulation of cellular response to stress	BP	746	1	0.557992
																				GO:0000139	Golgi membrane	CC	754	1	0.561918
																				GO:0008285	negative regulation of cell proliferation	BP	760	1	0.564841
																				GO:0001568	blood vessel development	BP	761	1	0.565326
																				GO:0010941	regulation of cell death	BP	1736	2	0.567158
																				GO:0051345	positive regulation of hydrolase activity	BP	771	1	0.570151
																				GO:0060322	head development	BP	776	1	0.572544
																				GO:0010564	regulation of cell cycle process	BP	789	1	0.578706
																				GO:0001944	vasculature development	BP	792	1	0.580116
																				GO:0072358	cardiovascular system development	BP	801	1	0.584319
																				GO:0055086	nucleobase-containing small molecule metabolic process	BP	801	1	0.584319
																				GO:0044283	small molecule biosynthetic process	BP	807	1	0.587099
																				GO:0098772	molecular function regulator	MF	1810	2	0.59079
																				GO:0010467	gene expression	BP	6585	7	0.592381
																				GO:0048609	multicellular organismal reproductive process	BP	838	1	0.60118
																				GO:0070925	organelle assembly	BP	845	1	0.604296
																				GO:0007049	cell cycle	BP	1854	2	0.604421
																				GO:0044238	primary metabolic process	BP	11287	12	0.6071
																				GO:0032504	multicellular organism reproduction	BP	853	1	0.607828
																				GO:0098655	cation transmembrane transport	BP	855	1	0.608706
																				GO:0034613	cellular protein localization	BP	1872	2	0.609906
																				GO:0098791	Golgi subcompartment	CC	859	1	0.610457
																				GO:0017111	nucleoside-triphosphatase activity	MF	865	1	0.61307
																				GO:0070727	cellular macromolecule localization	BP	1883	2	0.613232
																				GO:1903047	mitotic cell cycle process	BP	873	1	0.616527
																				GO:0005783	endoplasmic reticulum	CC	1911	2	0.621608
																				GO:0006996	organelle organization	BP	3885	4	0.62265
																				GO:0042592	homeostatic process	BP	1916	2	0.62309
																				GO:0061024	membrane organization	BP	892	1	0.624621
																				GO:0006518	peptide metabolic process	BP	894	1	0.625463
																				GO:0051641	cellular localization	BP	2927	3	0.627045
																				GO:0005768	endosome	CC	905	1	0.630064
																				GO:0060341	regulation of cellular localization	BP	906	1	0.63048
																				GO:0016462	pyrophosphatase activity	MF	914	1	0.633789
																				GO:0048523	negative regulation of cellular process	BP	4903	5	0.633862
																				GO:0014070	response to organic cyclic compound	BP	915	1	0.6342
																				GO:0016817	hydrolase activity, acting on acid anhydrides	MF	917	1	0.635022
																				GO:0016818	hydrolase activity, acting on acid anhydrides, in phosphorus-containing anhydrides	MF	917	1	0.635022
																				GO:0035239	tube morphogenesis	BP	920	1	0.636252
																				GO:0031328	positive regulation of cellular biosynthetic process	BP	1992	2	0.645113
																				GO:0030334	regulation of cell migration	BP	950	1	0.648331
																				GO:0044087	regulation of cellular component biogenesis	BP	954	1	0.649913
																				GO:0009891	positive regulation of biosynthetic process	BP	2025	2	0.65438
																				GO:0031175	neuron projection development	BP	978	1	0.659259
																				GO:0007417	central nervous system development	BP	1002	1	0.668368
																				GO:2000145	regulation of cell motility	BP	1012	1	0.672094
																				GO:0044703	multi-organism reproductive process	BP	1016	1	0.673573
																				GO:0000278	mitotic cell cycle	BP	1017	1	0.673942
																				GO:0120025	plasma membrane bounded cell projection	CC	2103	2	0.675574
																				GO:0030234	enzyme regulator activity	MF	1032	1	0.679426
																				GO:0000902	cell morphogenesis	BP	1034	1	0.680151
																				GO:0044429	mitochondrial part	CC	1036	1	0.680874
																				GO:0000166	nucleotide binding	MF	2125	2	0.681372
																				GO:1901265	nucleoside phosphate binding	MF	2126	2	0.681634
																				GO:0022857	transmembrane transporter activity	MF	1045	1	0.684108
																				GO:0044255	cellular lipid metabolic process	BP	1071	1	0.693277
																				GO:0042995	cell projection	CC	2178	2	0.69502
																				GO:0051270	regulation of cellular component movement	BP	1097	1	0.702192
																				GO:0003008	system process	BP	2216	2	0.704528
																				GO:0048666	neuron development	BP	1110	1	0.706556
																				GO:0005215	transporter activity	MF	1140	1	0.716395
																				GO:0009058	biosynthetic process	BP	6339	6	0.719685
																				GO:0043603	cellular amide metabolic process	BP	1157	1	0.721829
																				GO:0006812	cation transport	BP	1160	1	0.722778
																				GO:0019637	organophosphate metabolic process	BP	1177	1	0.728096
																				GO:0031967	organelle envelope	CC	1182	1	0.729641
																				GO:0031975	envelope	CC	1182	1	0.729641
																				GO:0044260	cellular macromolecule metabolic process	BP	8352	8	0.734862
																				GO:0045944	positive regulation of transcription by RNA polymerase II	BP	1204	1	0.736342
																				GO:0051726	regulation of cell cycle	BP	1213	1	0.739038
																				GO:0007399	nervous system development	BP	2375	2	0.741843
																				GO:0018193	peptidyl-amino acid modification	BP	1259	1	0.752408
																				GO:0004888	transmembrane signaling receptor activity	MF	1277	1	0.75746
																				GO:0010629	negative regulation of gene expression	BP	2448	2	0.757677
																				GO:0030054	cell junction	CC	1298	1	0.76323
																				GO:0007186	G protein-coupled receptor signaling pathway	BP	1371	1	0.782283
																				GO:0043231	intracellular membrane-bounded organelle	CC	11488	11	0.785587
																				GO:0006629	lipid metabolic process	BP	1407	1	0.791131
																				GO:0005524	ATP binding	MF	1473	1	0.80647
																				GO:1990904	ribonucleoprotein complex	CC	1478	1	0.807587
																				GO:0038023	signaling receptor activity	MF	1484	1	0.808919
																				GO:0045934	negative regulation of nucleobase-containing compound metabolic process	BP	1490	1	0.810243
																				GO:0120036	plasma membrane bounded cell projection organization	BP	1497	1	0.811776
																				GO:0032559	adenyl ribonucleotide binding	MF	1531	1	0.819056
																				GO:0045893	positive regulation of transcription, DNA-templated	BP	1535	1	0.819894
																				GO:0060089	molecular transducer activity	MF	1538	1	0.820521
																				GO:0030554	adenyl nucleotide binding	MF	1542	1	0.821353
																				GO:0044271	cellular nitrogen compound biosynthetic process	BP	5029	4	0.82573
																				GO:0034641	cellular nitrogen compound metabolic process	BP	7161	6	0.836097
																				GO:1903508	positive regulation of nucleic acid-templated transcription	BP	1621	1	0.837051
																				GO:1902680	positive regulation of RNA biosynthetic process	BP	1622	1	0.837241
																				GO:0044249	cellular biosynthetic process	BP	6168	5	0.838191
																				GO:0031327	negative regulation of cellular biosynthetic process	BP	1647	1	0.841923
																				GO:0009890	negative regulation of biosynthetic process	BP	1671	1	0.846297
																				GO:1901363	heterocyclic compound binding	MF	6241	5	0.846757
																				GO:1901576	organic substance biosynthetic process	BP	6259	5	0.848817
																				GO:0044430	cytoskeletal part	CC	1688	1	0.849325
																				GO:0051254	positive regulation of RNA metabolic process	BP	1706	1	0.852468
																				GO:0031984	organelle subcompartment	CC	1711	1	0.853331
																				GO:0097159	organic cyclic compound binding	MF	6328	5	0.856524
																				GO:0035639	purine ribonucleoside triphosphate binding	MF	1813	1	0.869903
																				GO:0031326	regulation of cellular biosynthetic process	BP	4325	3	0.873016
																				GO:0018130	heterocycle biosynthetic process	BP	4341	3	0.874782
																				GO:0019438	aromatic compound biosynthetic process	BP	4351	3	0.875876
																				GO:0032555	purine ribonucleotide binding	MF	1878	1	0.879514
																				GO:0010557	positive regulation of macromolecule biosynthetic process	BP	1880	1	0.879799
																				GO:0017076	purine nucleotide binding	MF	1891	1	0.881354
																				GO:0009889	regulation of biosynthetic process	BP	4404	3	0.881542
																				GO:0032553	ribonucleotide binding	MF	1894	1	0.881774
																				GO:0045935	positive regulation of nucleobase-containing compound metabolic process	BP	1899	1	0.882472
																				GO:1901362	organic cyclic compound biosynthetic process	BP	4500	3	0.891263
																				GO:0006355	regulation of transcription, DNA-templated	BP	3506	2	0.910904
																				GO:1903506	regulation of nucleic acid-templated transcription	BP	3567	2	0.916268
																				GO:2001141	regulation of RNA biosynthetic process	BP	3576	2	0.917035
																				GO:0005856	cytoskeleton	CC	2197	1	0.917654
																				GO:0006351	transcription, DNA-templated	BP	3668	2	0.924524
																				GO:0097659	nucleic acid-templated transcription	BP	3716	2	0.928188
																				GO:0032774	RNA biosynthetic process	BP	3733	2	0.929447
																				GO:0051252	regulation of RNA metabolic process	BP	3822	2	0.935724
																				GO:0005829	cytosol	CC	5085	3	0.93721
																				GO:0009059	macromolecule biosynthetic process	BP	5114	3	0.938969
																				GO:0003677	DNA binding	MF	2518	1	0.944233
																				GO:2000112	regulation of cellular macromolecule biosynthetic process	BP	3998	2	0.946689
																				GO:0010556	regulation of macromolecule biosynthetic process	BP	4138	2	0.954179
																				GO:0019219	regulation of nucleobase-containing compound metabolic process	BP	4140	2	0.954279
																				GO:0006357	regulation of transcription by RNA polymerase II	BP	2683	1	0.954481
																				GO:0006725	cellular aromatic compound metabolic process	BP	6615	4	0.9566
																				GO:0034654	nucleobase-containing compound biosynthetic process	BP	4278	2	0.960707
																				GO:0006366	transcription by RNA polymerase II	BP	2818	1	0.961503
																				GO:1901360	organic cyclic compound metabolic process	BP	6839	4	0.965364
																				GO:0043232	intracellular non-membrane-bounded organelle	CC	4784	2	0.977877
																				GO:0043228	non-membrane-bounded organelle	CC	4793	2	0.978107
																				GO:0034645	cellular macromolecule biosynthetic process	BP	4961	2	0.98203
																				GO:0016070	RNA metabolic process	BP	5206	2	0.986604
																				GO:0046483	heterocycle metabolic process	BP	6570	3	0.987328
																				GO:0005634	nucleus	CC	7932	4	0.989641
																				GO:0090304	nucleic acid metabolic process	BP	5735	2	0.993064
																				GO:0003676	nucleic acid binding	MF	4349	1	0.994764
																				GO:0006139	nucleobase-containing compound metabolic process	BP	6411	2	0.997151
																				GO:0002576	platelet degranulation	BP	128	0	1
																				GO:0001867	complement activation, lectin pathway	BP	13	0	1
																				GO:0001868	regulation of complement activation, lectin pathway	BP	2	0	1
																				GO:0001869	negative regulation of complement activation, lectin pathway	BP	2	0	1
																				GO:0002673	regulation of acute inflammatory response	BP	159	0	1
																				GO:0002698	negative regulation of immune effector process	BP	120	0	1
																				GO:0002920	regulation of humoral immune response	BP	134	0	1
																				GO:0002921	negative regulation of humoral immune response	BP	12	0	1
																				GO:0006956	complement activation	BP	175	0	1
																				GO:0007264	small GTPase mediated signal transduction	BP	571	0	1
																				GO:0007597	blood coagulation, intrinsic pathway	BP	18	0	1
																				GO:0030449	regulation of complement activation	BP	115	0	1
																				GO:0045824	negative regulation of innate immune response	BP	59	0	1
																				GO:0045916	negative regulation of complement activation	BP	8	0	1
																				GO:0048863	stem cell differentiation	BP	257	0	1
																				GO:0050777	negative regulation of immune response	BP	150	0	1
																				GO:0051056	regulation of small GTPase mediated signal transduction	BP	338	0	1
																				GO:0072376	protein activation cascade	BP	198	0	1
																				GO:0072378	blood coagulation, fibrin clot formation	BP	27	0	1
																				GO:2000257	regulation of protein activation cascade	BP	116	0	1
																				GO:2000258	negative regulation of protein activation cascade	BP	8	0	1
																				GO:0006953	acute-phase response	BP	47	0	1
																				GO:0010669	epithelial structure maintenance	BP	29	0	1
																				GO:0019216	regulation of lipid metabolic process	BP	410	0	1
																				GO:0022600	digestive system process	BP	100	0	1
																				GO:0030277	maintenance of gastrointestinal epithelium	BP	21	0	1
																				GO:0006638	neutral lipid metabolic process	BP	130	0	1
																				GO:0006639	acylglycerol metabolic process	BP	129	0	1
																				GO:0006641	triglyceride metabolic process	BP	105	0	1
																				GO:0009894	regulation of catabolic process	BP	979	0	1
																				GO:0009896	positive regulation of catabolic process	BP	423	0	1
																				GO:0010896	regulation of triglyceride catabolic process	BP	12	0	1
																				GO:0010898	positive regulation of triglyceride catabolic process	BP	7	0	1
																				GO:0016042	lipid catabolic process	BP	333	0	1
																				GO:0019433	triglyceride catabolic process	BP	35	0	1
																				GO:0031329	regulation of cellular catabolic process	BP	871	0	1
																				GO:0031331	positive regulation of cellular catabolic process	BP	361	0	1
																				GO:0044242	cellular lipid catabolic process	BP	217	0	1
																				GO:0045834	positive regulation of lipid metabolic process	BP	146	0	1
																				GO:0046461	neutral lipid catabolic process	BP	43	0	1
																				GO:0046464	acylglycerol catabolic process	BP	43	0	1
																				GO:0046486	glycerolipid metabolic process	BP	414	0	1
																				GO:0046503	glycerolipid catabolic process	BP	64	0	1
																				GO:0050994	regulation of lipid catabolic process	BP	54	0	1
																				GO:0050996	positive regulation of lipid catabolic process	BP	24	0	1
																				GO:0090207	regulation of triglyceride metabolic process	BP	40	0	1
																				GO:0090208	positive regulation of triglyceride metabolic process	BP	21	0	1
																				GO:0010594	regulation of endothelial cell migration	BP	229	0	1
																				GO:0010595	positive regulation of endothelial cell migration	BP	128	0	1
																				GO:0014812	muscle cell migration	BP	104	0	1
																				GO:0014909	smooth muscle cell migration	BP	91	0	1
																				GO:0022613	ribonucleoprotein complex biogenesis	BP	502	0	1
																				GO:0042254	ribosome biogenesis	BP	297	0	1
																				GO:0042273	ribosomal large subunit biogenesis	BP	71	0	1
																				GO:0043542	endothelial cell migration	BP	273	0	1
																				GO:0006473	protein acetylation	BP	204	0	1
																				GO:0006474	N-terminal protein amino acid acetylation	BP	17	0	1
																				GO:0006586	indolalkylamine metabolic process	BP	17	0	1
																				GO:0007623	circadian rhythm	BP	208	0	1
																				GO:0009416	response to light stimulus	BP	314	0	1
																				GO:0009648	photoperiodism	BP	25	0	1
																				GO:0030186	melatonin metabolic process	BP	2	0	1
																				GO:0030187	melatonin biosynthetic process	BP	2	0	1
																				GO:0031365	N-terminal protein amino acid modification	BP	29	0	1
																				GO:0034694	response to prostaglandin	BP	31	0	1
																				GO:0034695	response to prostaglandin E	BP	23	0	1
																				GO:0034754	cellular hormone metabolic process	BP	129	0	1
																				GO:0042430	indole-containing compound metabolic process	BP	24	0	1
																				GO:0042435	indole-containing compound biosynthetic process	BP	5	0	1
																				GO:0042446	hormone biosynthetic process	BP	86	0	1
																				GO:0043543	protein acylation	BP	248	0	1
																				GO:0043604	amide biosynthetic process	BP	876	0	1
																				GO:0046219	indolalkylamine biosynthetic process	BP	5	0	1
																				GO:0046688	response to copper ion	BP	44	0	1
																				GO:0051385	response to mineralocorticoid	BP	32	0	1
																				GO:0051412	response to corticosterone	BP	21	0	1
																				GO:0071320	cellular response to cAMP	BP	53	0	1
																				GO:0071407	cellular response to organic cyclic compound	BP	542	0	1
																				GO:1901654	response to ketone	BP	193	0	1
																				GO:0002181	cytoplasmic translation	BP	100	0	1
																				GO:0002182	cytoplasmic translational elongation	BP	11	0	1
																				GO:0006396	RNA processing	BP	1456	0	1
																				GO:0006399	tRNA metabolic process	BP	193	0	1
																				GO:0006400	tRNA modification	BP	86	0	1
																				GO:0006412	translation	BP	714	0	1
																				GO:0006414	translational elongation	BP	133	0	1
																				GO:0006417	regulation of translation	BP	424	0	1
																				GO:0006418	tRNA aminoacylation for protein translation	BP	45	0	1
																				GO:0006419	alanyl-tRNA aminoacylation	BP	3	0	1
																				GO:0006448	regulation of translational elongation	BP	19	0	1
																				GO:0006450	regulation of translational fidelity	BP	21	0	1
																				GO:0008033	tRNA processing	BP	130	0	1
																				GO:0009451	RNA modification	BP	163	0	1
																				GO:0010608	posttranscriptional regulation of gene expression	BP	1169	0	1
																				GO:0021549	cerebellum development	BP	102	0	1
																				GO:0021680	cerebellar Purkinje cell layer development	BP	25	0	1
																				GO:0021695	cerebellar cortex development	BP	47	0	1
																				GO:0022037	metencephalon development	BP	111	0	1
																				GO:0030902	hindbrain development	BP	152	0	1
																				GO:0034248	regulation of cellular amide metabolic process	BP	483	0	1
																				GO:0034470	ncRNA processing	BP	384	0	1
																				GO:0034660	ncRNA metabolic process	BP	562	0	1
																				GO:0043038	amino acid activation	BP	49	0	1
																				GO:0043039	tRNA aminoacylation	BP	48	0	1
																				GO:0043043	peptide biosynthetic process	BP	739	0	1
																				GO:0043523	regulation of neuron apoptotic process	BP	210	0	1
																				GO:0043524	negative regulation of neuron apoptotic process	BP	147	0	1
																				GO:0050877	nervous system process	BP	1437	0	1
																				GO:0050885	neuromuscular process controlling balance	BP	52	0	1
																				GO:0050905	neuromuscular process	BP	107	0	1
																				GO:0051402	neuron apoptotic process	BP	239	0	1
																				GO:0070997	neuron death	BP	348	0	1
																				GO:0106074	aminoacyl-tRNA metabolism involved in translational fidelity	BP	13	0	1
																				GO:0140018	regulation of cytoplasmic translational fidelity	BP	1	0	1
																				GO:1900247	regulation of cytoplasmic translational elongation	BP	11	0	1
																				GO:1901214	regulation of neuron death	BP	313	0	1
																				GO:1901215	negative regulation of neuron death	BP	208	0	1
																				GO:2000765	regulation of cytoplasmic translation	BP	29	0	1
																				GO:0003012	muscle system process	BP	465	0	1
																				GO:0006820	anion transport	BP	629	0	1
																				GO:0006835	dicarboxylic acid transport	BP	96	0	1
																				GO:0006836	neurotransmitter transport	BP	269	0	1
																				GO:0006865	amino acid transport	BP	145	0	1
																				GO:0006936	muscle contraction	BP	360	0	1
																				GO:0006937	regulation of muscle contraction	BP	171	0	1
																				GO:0006939	smooth muscle contraction	BP	110	0	1
																				GO:0006940	regulation of smooth muscle contraction	BP	65	0	1
																				GO:0007162	negative regulation of cell adhesion	BP	289	0	1
																				GO:0007618	mating	BP	40	0	1
																				GO:0007620	copulation	BP	20	0	1
																				GO:0007626	locomotory behavior	BP	198	0	1
																				GO:0009449	gamma-aminobutyric acid biosynthetic process	BP	3	0	1
																				GO:0009450	gamma-aminobutyric acid catabolic process	BP	2	0	1
																				GO:0010039	response to iron ion	BP	33	0	1
																				GO:0010543	regulation of platelet activation	BP	31	0	1
																				GO:0010544	negative regulation of platelet activation	BP	19	0	1
																				GO:0014046	dopamine secretion	BP	40	0	1
																				GO:0014051	gamma-aminobutyric acid secretion	BP	9	0	1
																				GO:0014052	regulation of gamma-aminobutyric acid secretion	BP	6	0	1
																				GO:0014053	negative regulation of gamma-aminobutyric acid secretion	BP	1	0	1
																				GO:0014059	regulation of dopamine secretion	BP	40	0	1
																				GO:0015696	ammonium transport	BP	108	0	1
																				GO:0015711	organic anion transport	BP	482	0	1
																				GO:0015718	monocarboxylic acid transport	BP	162	0	1
																				GO:0015740	C4-dicarboxylate transport	BP	23	0	1
																				GO:0015800	acidic amino acid transport	BP	66	0	1
																				GO:0015812	gamma-aminobutyric acid transport	BP	13	0	1
																				GO:0015837	amine transport	BP	102	0	1
																				GO:0015844	monoamine transport	BP	90	0	1
																				GO:0015849	organic acid transport	BP	333	0	1
																				GO:0015850	organic hydroxy compound transport	BP	262	0	1
																				GO:0015872	dopamine transport	BP	52	0	1
																				GO:0019953	sexual reproduction	BP	848	0	1
																				GO:0022408	negative regulation of cell-cell adhesion	BP	181	0	1
																				GO:0030072	peptide hormone secretion	BP	250	0	1
																				GO:0030073	insulin secretion	BP	207	0	1
																				GO:0030168	platelet activation	BP	153	0	1
																				GO:0030193	regulation of blood coagulation	BP	79	0	1
																				GO:0030195	negative regulation of blood coagulation	BP	53	0	1
																				GO:0030534	adult behavior	BP	144	0	1
																				GO:0031644	regulation of neurological system process	BP	137	0	1
																				GO:0031646	positive regulation of neurological system process	BP	63	0	1
																				GO:0031649	heat generation	BP	17	0	1
																				GO:0031650	regulation of heat generation	BP	13	0	1
																				GO:0031652	positive regulation of heat generation	BP	11	0	1
																				GO:0032024	positive regulation of insulin secretion	BP	72	0	1
																				GO:0032890	regulation of organic acid transport	BP	59	0	1
																				GO:0032891	negative regulation of organic acid transport	BP	21	0	1
																				GO:0032892	positive regulation of organic acid transport	BP	34	0	1
																				GO:0033238	regulation of cellular amine metabolic process	BP	81	0	1
																				GO:0033240	positive regulation of cellular amine metabolic process	BP	9	0	1
																				GO:0033602	negative regulation of dopamine secretion	BP	3	0	1
																				GO:0033604	negative regulation of catecholamine secretion	BP	15	0	1
																				GO:0034109	homotypic cell-cell adhesion	BP	81	0	1
																				GO:0034110	regulation of homotypic cell-cell adhesion	BP	25	0	1
																				GO:0034111	negative regulation of homotypic cell-cell adhesion	BP	15	0	1
																				GO:0035640	exploration behavior	BP	26	0	1
																				GO:0042053	regulation of dopamine metabolic process	BP	20	0	1
																				GO:0042069	regulation of catecholamine metabolic process	BP	20	0	1
																				GO:0042220	response to cocaine	BP	55	0	1
																				GO:0043270	positive regulation of ion transport	BP	275	0	1
																				GO:0043279	response to alkaloid	BP	112	0	1
																				GO:0044070	regulation of anion transport	BP	95	0	1
																				GO:0045776	negative regulation of blood pressure	BP	46	0	1
																				GO:0045915	positive regulation of catecholamine metabolic process	BP	6	0	1
																				GO:0045933	positive regulation of muscle contraction	BP	48	0	1
																				GO:0045964	positive regulation of dopamine metabolic process	BP	6	0	1
																				GO:0045987	positive regulation of smooth muscle contraction	BP	32	0	1
																				GO:0046717	acid secretion	BP	124	0	1
																				GO:0046942	carboxylic acid transport	BP	333	0	1
																				GO:0048148	behavioral response to cocaine	BP	20	0	1
																				GO:0050432	catecholamine secretion	BP	64	0	1
																				GO:0050433	regulation of catecholamine secretion	BP	62	0	1
																				GO:0050796	regulation of insulin secretion	BP	176	0	1
																				GO:0050818	regulation of coagulation	BP	84	0	1
																				GO:0050819	negative regulation of coagulation	BP	57	0	1
																				GO:0050866	negative regulation of cell activation	BP	199	0	1
																				GO:0051588	regulation of neurotransmitter transport	BP	139	0	1
																				GO:0051589	negative regulation of neurotransmitter transport	BP	23	0	1
																				GO:0051937	catecholamine transport	BP	77	0	1
																				GO:0051952	regulation of amine transport	BP	95	0	1
																				GO:0051953	negative regulation of amine transport	BP	27	0	1
																				GO:0051954	positive regulation of amine transport	BP	35	0	1
																				GO:0051955	regulation of amino acid transport	BP	33	0	1
																				GO:0051956	negative regulation of amino acid transport	BP	12	0	1
																				GO:0051957	positive regulation of amino acid transport	BP	18	0	1
																				GO:0060078	regulation of postsynaptic membrane potential	BP	140	0	1
																				GO:0060080	inhibitory postsynaptic potential	BP	17	0	1
																				GO:0060359	response to ammonium ion	BP	135	0	1
																				GO:0061041	regulation of wound healing	BP	148	0	1
																				GO:0061045	negative regulation of wound healing	BP	76	0	1
																				GO:0061528	aspartate secretion	BP	1	0	1
																				GO:0070459	prolactin secretion	BP	8	0	1
																				GO:0070471	uterine smooth muscle contraction	BP	11	0	1
																				GO:0070472	regulation of uterine smooth muscle contraction	BP	10	0	1
																				GO:0070474	positive regulation of uterine smooth muscle contraction	BP	7	0	1
																				GO:0070527	platelet aggregation	BP	59	0	1
																				GO:0072329	monocarboxylic acid catabolic process	BP	132	0	1
																				GO:0072330	monocarboxylic acid biosynthetic process	BP	343	0	1
																				GO:0072347	response to anesthetic	BP	78	0	1
																				GO:0090257	regulation of muscle system process	BP	259	0	1
																				GO:0090276	regulation of peptide hormone secretion	BP	208	0	1
																				GO:0090277	positive regulation of peptide hormone secretion	BP	96	0	1
																				GO:0090330	regulation of platelet aggregation	BP	18	0	1
																				GO:0090331	negative regulation of platelet aggregation	BP	12	0	1
																				GO:0097151	positive regulation of inhibitory postsynaptic potential	BP	7	0	1
																				GO:0098828	modulation of inhibitory postsynaptic potential	BP	7	0	1
																				GO:0099565	chemical synaptic transmission, postsynaptic	BP	108	0	1
																				GO:1900046	regulation of hemostasis	BP	80	0	1
																				GO:1900047	negative regulation of hemostasis	BP	54	0	1
																				GO:1902722	positive regulation of prolactin secretion	BP	3	0	1
																				GO:1903034	regulation of response to wounding	BP	179	0	1
																				GO:1903035	negative regulation of response to wounding	BP	90	0	1
																				GO:1903792	negative regulation of anion transport	BP	28	0	1
																				GO:1903793	positive regulation of anion transport	BP	50	0	1
																				GO:1904448	regulation of aspartate secretion	BP	1	0	1
																				GO:1904450	positive regulation of aspartate secretion	BP	1	0	1
																				GO:2001024	negative regulation of response to drug	BP	33	0	1
																				GO:0006066	alcohol metabolic process	BP	364	0	1
																				GO:0006497	protein lipidation	BP	89	0	1
																				GO:0006909	phagocytosis	BP	369	0	1
																				GO:0006911	phagocytosis, engulfment	BP	118	0	1
																				GO:0007033	vacuole organization	BP	163	0	1
																				GO:0007040	lysosome organization	BP	61	0	1
																				GO:0007187	G protein-coupled receptor signaling pathway, coupled to cyclic nucleotide second messenger	BP	256	0	1
																				GO:0007188	adenylate cyclase-modulating G protein-coupled receptor signaling pathway	BP	221	0	1
																				GO:0007189	adenylate cyclase-activating G protein-coupled receptor signaling pathway	BP	139	0	1
																				GO:0007265	Ras protein signal transduction	BP	448	0	1
																				GO:0007266	Rho protein signal transduction	BP	203	0	1
																				GO:0008202	steroid metabolic process	BP	331	0	1
																				GO:0008203	cholesterol metabolic process	BP	150	0	1
																				GO:0010324	membrane invagination	BP	135	0	1
																				GO:0010742	macrophage derived foam cell differentiation	BP	36	0	1
																				GO:0010743	regulation of macrophage derived foam cell differentiation	BP	30	0	1
																				GO:0010745	negative regulation of macrophage derived foam cell differentiation	BP	13	0	1
																				GO:0010874	regulation of cholesterol efflux	BP	39	0	1
																				GO:0010875	positive regulation of cholesterol efflux	BP	16	0	1
																				GO:0010878	cholesterol storage	BP	18	0	1
																				GO:0010883	regulation of lipid storage	BP	46	0	1
																				GO:0010885	regulation of cholesterol storage	BP	16	0	1
																				GO:0010887	negative regulation of cholesterol storage	BP	8	0	1
																				GO:0010888	negative regulation of lipid storage	BP	19	0	1
																				GO:0015748	organophosphate ester transport	BP	105	0	1
																				GO:0015914	phospholipid transport	BP	75	0	1
																				GO:0015918	sterol transport	BP	112	0	1
																				GO:0016125	sterol metabolic process	BP	166	0	1
																				GO:0016197	endosomal transport	BP	224	0	1
																				GO:0019915	lipid storage	BP	68	0	1
																				GO:0019933	cAMP-mediated signaling	BP	187	0	1
																				GO:0019935	cyclic-nucleotide-mediated signaling	BP	215	0	1
																				GO:0030301	cholesterol transport	BP	100	0	1
																				GO:0031334	positive regulation of protein complex assembly	BP	268	0	1
																				GO:0032365	intracellular lipid transport	BP	43	0	1
																				GO:0032366	intracellular sterol transport	BP	26	0	1
																				GO:0032367	intracellular cholesterol transport	BP	26	0	1
																				GO:0032371	regulation of sterol transport	BP	63	0	1
																				GO:0032373	positive regulation of sterol transport	BP	23	0	1
																				GO:0032374	regulation of cholesterol transport	BP	63	0	1
																				GO:0032376	positive regulation of cholesterol transport	BP	23	0	1
																				GO:0032488	Cdc42 protein signal transduction	BP	13	0	1
																				GO:0032489	regulation of Cdc42 protein signal transduction	BP	7	0	1
																				GO:0032526	response to retinoic acid	BP	108	0	1
																				GO:0032611	interleukin-1 beta production	BP	101	0	1
																				GO:0033344	cholesterol efflux	BP	57	0	1
																				GO:0033363	secretory granule organization	BP	35	0	1
																				GO:0033700	phospholipid efflux	BP	12	0	1
																				GO:0034204	lipid translocation	BP	26	0	1
																				GO:0034377	plasma lipoprotein particle assembly	BP	28	0	1
																				GO:0034380	high-density lipoprotein particle assembly	BP	15	0	1
																				GO:0034405	response to fluid shear stress	BP	37	0	1
																				GO:0034616	response to laminar fluid shear stress	BP	15	0	1
																				GO:0035023	regulation of Rho protein signal transduction	BP	140	0	1
																				GO:0036314	response to sterol	BP	33	0	1
																				GO:0036315	cellular response to sterol	BP	24	0	1
																				GO:0038027	apolipoprotein A-I-mediated signaling pathway	BP	8	0	1
																				GO:0042157	lipoprotein metabolic process	BP	130	0	1
																				GO:0042158	lipoprotein biosynthetic process	BP	94	0	1
																				GO:0042632	cholesterol homeostasis	BP	96	0	1
																				GO:0043254	regulation of protein complex assembly	BP	467	0	1
																				GO:0043691	reverse cholesterol transport	BP	20	0	1
																				GO:0045332	phospholipid translocation	BP	25	0	1
																				GO:0046578	regulation of Ras protein signal transduction	BP	238	0	1
																				GO:0046907	intracellular transport	BP	1847	0	1
																				GO:0050702	interleukin-1 beta secretion	BP	53	0	1
																				GO:0051649	establishment of localization in cell	BP	2242	0	1
																				GO:0055081	anion homeostasis	BP	58	0	1
																				GO:0055088	lipid homeostasis	BP	151	0	1
																				GO:0055091	phospholipid homeostasis	BP	11	0	1
																				GO:0055092	sterol homeostasis	BP	97	0	1
																				GO:0055094	response to lipoprotein particle	BP	32	0	1
																				GO:0060155	platelet dense granule organization	BP	8	0	1
																				GO:0065005	protein-lipid complex assembly	BP	32	0	1
																				GO:0070723	response to cholesterol	BP	29	0	1
																				GO:0071300	cellular response to retinoic acid	BP	69	0	1
																				GO:0071397	cellular response to cholesterol	BP	20	0	1
																				GO:0071402	cellular response to lipoprotein particle stimulus	BP	34	0	1
																				GO:0071404	cellular response to low-density lipoprotein particle stimulus	BP	22	0	1
																				GO:0071825	protein-lipid complex subunit organization	BP	49	0	1
																				GO:0071827	plasma lipoprotein particle organization	BP	45	0	1
																				GO:0080171	lytic vacuole organization	BP	61	0	1
																				GO:0090077	foam cell differentiation	BP	36	0	1
																				GO:0090107	regulation of high-density lipoprotein particle assembly	BP	3	0	1
																				GO:0090108	positive regulation of high-density lipoprotein particle assembly	BP	1	0	1
																				GO:0097006	regulation of plasma lipoprotein particle levels	BP	101	0	1
																				GO:0097035	regulation of membrane lipid distribution	BP	50	0	1
																				GO:0097306	cellular response to alcohol	BP	89	0	1
																				GO:0098656	anion transmembrane transport	BP	288	0	1
																				GO:0099024	plasma membrane invagination	BP	127	0	1
																				GO:1902652	secondary alcohol metabolic process	BP	155	0	1
																				GO:1905953	negative regulation of lipid localization	BP	61	0	1
																				GO:0032377	regulation of intracellular lipid transport	BP	11	0	1
																				GO:0032380	regulation of intracellular sterol transport	BP	11	0	1
																				GO:0032383	regulation of intracellular cholesterol transport	BP	11	0	1
																				GO:0032386	regulation of intracellular transport	BP	423	0	1
																				GO:0015886	heme transport	BP	8	0	1
																				GO:0006649	phospholipid transfer to membrane	BP	2	0	1
																				GO:0007600	sensory perception	BP	977	0	1
																				GO:0007601	visual perception	BP	218	0	1
																				GO:0007602	phototransduction	BP	59	0	1
																				GO:0007603	phototransduction, visible light	BP	34	0	1
																				GO:0009581	detection of external stimulus	BP	133	0	1
[truncated: 20,912 more rows]

## Sheet: RNASeq_PC1_HL-UM
Term_id	Term	Ont	N	DE	P.DE
GO:0042581	specific granule	CC	160	10	2.44629e-14
GO:0035580	specific granule lumen	CC	62	8	3.28655e-14
GO:0043312	neutrophil degranulation	BP	485	13	8.7437e-14
GO:0002283	neutrophil activation involved in immune response	BP	488	13	9.45937e-14
GO:0042119	neutrophil activation	BP	498	13	1.22514e-13
GO:0002446	neutrophil mediated immunity	BP	499	13	1.25686e-13
GO:0036230	granulocyte activation	BP	504	13	1.42709e-13
GO:0043299	leukocyte degranulation	BP	534	13	2.97758e-13
GO:0002275	myeloid cell activation involved in immune response	BP	544	13	3.76853e-13
GO:0002444	myeloid leukocyte mediated immunity	BP	551	13	4.43223e-13
GO:0002274	myeloid leukocyte activation	BP	651	13	3.6428e-12
GO:0030141	secretory granule	CC	833	14	4.21877e-12
GO:0002366	leukocyte activation involved in immune response	BP	707	13	1.02586e-11
GO:0002263	cell activation involved in immune response	BP	711	13	1.10091e-11
GO:0099503	secretory vesicle	CC	986	14	4.02105e-11
GO:0045055	regulated exocytosis	BP	794	13	4.36304e-11
GO:0002443	leukocyte mediated immunity	BP	874	13	1.43335e-10
GO:1904724	tertiary granule lumen	CC	55	6	1.97539e-10
GO:0006887	exocytosis	BP	903	13	2.14404e-10
GO:0034774	secretory granule lumen	CC	321	9	7.57506e-10
GO:0032940	secretion by cell	BP	1524	15	1.06128e-09
GO:0060205	cytoplasmic vesicle lumen	CC	338	9	1.19224e-09
GO:0031983	vesicle lumen	CC	339	9	1.22356e-09
GO:0045321	leukocyte activation	BP	1284	14	1.30035e-09
GO:0009605	response to external stimulus	BP	2520	18	1.64478e-09
GO:0046903	secretion	BP	1661	15	3.48599e-09
GO:0070820	tertiary granule	CC	164	7	4.14272e-09
GO:0001775	cell activation	BP	1440	14	5.74001e-09
GO:0044433	cytoplasmic vesicle part	CC	1504	14	1.00354e-08
GO:0002252	immune effector process	BP	1265	13	1.29123e-08
GO:0006955	immune response	BP	2279	16	3.04639e-08
GO:0009617	response to bacterium	BP	699	10	4.64401e-08
GO:0016192	vesicle-mediated transport	BP	2107	15	8.77675e-08
GO:0010033	response to organic substance	BP	3302	18	1.26081e-07
GO:0005615	extracellular space	CC	3563	18	4.13489e-07
GO:0002376	immune system process	BP	3193	17	5.29648e-07
GO:0071222	cellular response to lipopolysaccharide	BP	205	6	5.57406e-07
GO:0005576	extracellular region	CC	4586	20	5.96197e-07
GO:0071219	cellular response to molecule of bacterial origin	BP	212	6	6.78479e-07
GO:0006952	defense response	BP	1797	13	7.93941e-07
GO:0044421	extracellular region part	CC	3763	18	9.59559e-07
GO:0030198	extracellular matrix organization	BP	368	7	1.0333e-06
GO:0071216	cellular response to biotic stimulus	BP	236	6	1.26827e-06
GO:0051707	response to other organism	BP	1013	10	1.43132e-06
GO:0043207	response to external biotic stimulus	BP	1015	10	1.45714e-06
GO:0009607	response to biotic stimulus	BP	1047	10	1.92949e-06
GO:0031410	cytoplasmic vesicle	CC	2314	14	2.15897e-06
GO:0097708	intracellular vesicle	CC	2317	14	2.19296e-06
GO:0043062	extracellular structure organization	BP	422	7	2.56674e-06
GO:0004252	serine-type endopeptidase activity	MF	160	5	3.93396e-06
GO:0006810	transport	BP	5190	20	4.78826e-06
GO:0070887	cellular response to chemical stimulus	BP	3281	16	4.80946e-06
GO:0070062	extracellular exosome	CC	2163	13	6.43487e-06
GO:0051234	establishment of localization	BP	5315	20	7.09467e-06
GO:0042221	response to chemical	BP	4797	19	7.19465e-06
GO:1903561	extracellular vesicle	CC	2186	13	7.23575e-06
GO:0008236	serine-type peptidase activity	MF	182	5	7.37559e-06
GO:0043230	extracellular organelle	CC	2191	13	7.42119e-06
GO:0017171	serine hydrolase activity	MF	186	5	8.19755e-06
GO:0032496	response to lipopolysaccharide	BP	330	6	8.74626e-06
GO:0031982	vesicle	CC	3884	17	8.80097e-06
GO:0002237	response to molecule of bacterial origin	BP	343	6	1.08971e-05
GO:0012505	endomembrane system	CC	4441	18	1.15778e-05
GO:0050896	response to stimulus	BP	9324	26	1.22068e-05
GO:0071310	cellular response to organic substance	BP	2707	14	1.38959e-05
GO:1901700	response to oxygen-containing compound	BP	1637	11	1.54666e-05
GO:0051179	localization	BP	6735	22	1.58367e-05
GO:0019221	cytokine-mediated signaling pathway	BP	798	8	1.81747e-05
GO:0032963	collagen metabolic process	BP	115	4	2.63637e-05
GO:0071396	cellular response to lipid	BP	610	7	2.82712e-05
GO:0050832	defense response to fungus	BP	40	3	2.98353e-05
GO:1901701	cellular response to oxygen-containing compound	BP	1136	9	3.18931e-05
GO:0033993	response to lipid	BP	923	8	5.14625e-05
GO:0051704	multi-organism process	BP	2635	13	5.50224e-05
GO:0070943	neutrophil mediated killing of symbiont cell	BP	8	2	6.16884e-05
GO:0009620	response to fungus	BP	52	3	6.59215e-05
GO:0005766	primary lysosome	CC	155	4	8.45625e-05
GO:0042582	azurophil granule	CC	155	4	8.45625e-05
GO:0070942	neutrophil mediated cytotoxicity	BP	10	2	9.89551e-05
GO:0031640	killing of cells of other organism	BP	62	3	0.000111663
GO:0044364	disruption of cells of other organism	BP	62	3	0.000111663
GO:0042742	defense response to bacterium	BP	330	5	0.000126663
GO:0005518	collagen binding	MF	67	3	0.000140717
GO:0051873	killing by host of symbiont cells	BP	12	2	0.00014486
GO:0009635	response to herbicide	BP	13	2	0.000171037
GO:0098542	defense response to other organism	BP	568	6	0.000180319
GO:0022610	biological adhesion	BP	1427	9	0.000186346
GO:0071345	cellular response to cytokine stimulus	BP	1118	8	0.000196117
GO:0045861	negative regulation of proteolysis	BP	363	5	0.000197515
GO:0051852	disruption by host of symbiont cells	BP	14	2	0.000199355
GO:0051851	modification by host of symbiont morphology or physiology	BP	77	3	0.000212683
GO:0051240	positive regulation of multicellular organismal process	BP	1811	10	0.000222391
GO:0006954	inflammatory response	BP	848	7	0.000223364
GO:0051883	killing of cells in other organism involved in symbiotic interaction	BP	15	2	0.000229809
GO:0022617	extracellular matrix disassembly	BP	80	3	0.000238148
GO:0007166	cell surface receptor signaling pathway	BP	3052	13	0.00025406
GO:0051702	interaction with symbiont	BP	82	3	0.000256174
GO:0051818	disruption of cells of other organism involved in symbiotic interaction	BP	17	2	0.000297096
GO:0034097	response to cytokine	BP	1211	8	0.000338231
GO:0035578	azurophil granule lumen	CC	91	3	0.000348194
GO:0032101	regulation of response to external stimulus	BP	913	7	0.000350511
GO:0006950	response to stress	BP	4110	15	0.00037397
GO:0000302	response to reactive oxygen species	BP	232	4	0.000396465
GO:0006525	arginine metabolic process	BP	20	2	0.000413888
GO:0071682	endocytic vesicle lumen	CC	20	2	0.000413888
GO:0004175	endopeptidase activity	MF	427	5	0.000417336
GO:0010951	negative regulation of endopeptidase activity	BP	250	4	0.000525523
GO:0051716	cellular response to stimulus	BP	7617	21	0.000535913
GO:0010466	negative regulation of peptidase activity	BP	262	4	0.000626654
GO:0051817	modification of morphology or physiology of other organism involved in symbiotic interaction	BP	112	3	0.000639374
GO:1990266	neutrophil migration	BP	118	3	0.000744189
GO:0019730	antimicrobial humoral response	BP	122	3	0.000819801
GO:0007155	cell adhesion	BP	1420	8	0.000976353
GO:0001818	negative regulation of cytokine production	BP	296	4	0.000987613
GO:0002888	positive regulation of myeloid leukocyte mediated immunity	BP	31	2	0.00100249
GO:0070207	protein homotrimerization	BP	32	2	0.00106832
GO:0030139	endocytic vesicle	CC	303	4	0.00107694
GO:0060326	cell chemotaxis	BP	304	4	0.00109016
GO:0065008	regulation of biological quality	BP	4057	14	0.00120296
GO:0042737	drug catabolic process	BP	140	3	0.00122016
GO:0043086	negative regulation of catalytic activity	BP	815	6	0.00122086
GO:0097530	granulocyte migration	BP	141	3	0.00124542
GO:2000310	regulation of NMDA receptor activity	BP	36	2	0.00135183
GO:0042542	response to hydrogen peroxide	BP	146	3	0.00137663
GO:0051049	regulation of transport	BP	1879	9	0.00140578
GO:0003824	catalytic activity	MF	5710	17	0.00140601
GO:0070953	regulation of neutrophil mediated killing of fungus	BP	1	1	0.00151308
GO:0070965	positive regulation of neutrophil mediated killing of fungus	BP	1	1	0.00151308
GO:0070946	neutrophil mediated killing of gram-positive bacterium	BP	1	1	0.00151308
GO:0016131	brassinosteroid metabolic process	BP	1	1	0.00151308
GO:0016132	brassinosteroid biosynthetic process	BP	1	1	0.00151308
GO:0033214	iron assimilation by chelation and transport	BP	1	1	0.00151308
GO:1900159	positive regulation of bone mineralization involved in bone maturation	BP	1	1	0.00151308
GO:2000308	negative regulation of tumor necrosis factor (ligand) superfamily member 11 production	BP	1	1	0.00151308
GO:0044795	trans-Golgi network to recycling endosome transport	BP	1	1	0.00151308
GO:0048673	collateral sprouting of intact axon in response to injury	BP	1	1	0.00151308
GO:0048683	regulation of collateral sprouting of intact axon in response to injury	BP	1	1	0.00151308
GO:0048685	negative regulation of collateral sprouting of intact axon in response to injury	BP	1	1	0.00151308
GO:0050712	negative regulation of interleukin-1 alpha secretion	BP	1	1	0.00151308
GO:2000872	positive regulation of progesterone secretion	BP	1	1	0.00151308
GO:0034679	integrin alpha9-beta1 complex	CC	1	1	0.00151308
GO:0008843	endochitinase activity	MF	1	1	0.00151308
GO:0009918	sterol delta7 reductase activity	MF	1	1	0.00151308
GO:0047598	7-dehydrocholesterol reductase activity	MF	1	1	0.00151308
GO:0004398	histidine decarboxylase activity	MF	1	1	0.00151308
GO:0009653	anatomical structure morphogenesis	BP	2735	11	0.00152263
GO:0042133	neurotransmitter metabolic process	BP	153	3	0.0015745
GO:0150077	regulation of neuroinflammatory response	BP	41	2	0.00175126
GO:0051239	regulation of multicellular organismal process	BP	3260	12	0.00186443
GO:0070011	peptidase activity, acting on L-amino acid peptides	MF	599	5	0.00190109
GO:0035821	modification of morphology or physiology of other organism	BP	164	3	0.00192
GO:0006959	humoral immune response	BP	356	4	0.00194659
GO:0034614	cellular response to reactive oxygen species	BP	168	3	0.00205644
GO:0001906	cell killing	BP	168	3	0.00205644
GO:0035987	endodermal cell differentiation	BP	45	2	0.00210639
GO:0032102	negative regulation of response to external stimulus	BP	365	4	0.00213164
GO:0005775	vacuolar lumen	CC	172	3	0.00219879
GO:0019731	antibacterial humoral response	BP	46	2	0.00220006
GO:0008233	peptidase activity	MF	623	5	0.00225685
GO:0030574	collagen catabolic process	BP	47	2	0.00229568
GO:0004866	endopeptidase inhibitor activity	MF	175	3	0.00230948
GO:0044444	cytoplasmic part	CC	9735	23	0.00232772
GO:0001936	regulation of endothelial cell proliferation	BP	176	3	0.00234713
GO:0004857	enzyme inhibitor activity	MF	375	4	0.00235119
GO:2001257	regulation of cation channel activity	BP	178	3	0.00242358
GO:0071347	cellular response to interleukin-1	BP	179	3	0.00246238
GO:0030414	peptidase inhibitor activity	MF	182	3	0.00258109
GO:0061135	endopeptidase regulator activity	MF	182	3	0.00258109
GO:0001706	endoderm formation	BP	50	2	0.00259416
GO:0007566	embryo implantation	BP	51	2	0.00269751
GO:0098805	whole membrane	CC	1666	8	0.00271869
GO:0048584	positive regulation of response to stimulus	BP	2500	10	0.00281015
GO:0048522	positive regulation of cellular process	BP	5490	16	0.00282905
GO:0032964	collagen biosynthetic process	BP	53	2	0.00290994
GO:1903532	positive regulation of secretion by cell	BP	399	4	0.00294107
GO:0001935	endothelial cell proliferation	BP	191	3	0.00295831
GO:0007565	female pregnancy	BP	192	3	0.0030022
GO:0006584	catecholamine metabolic process	BP	54	2	0.00301902
GO:0009712	catechol-containing compound metabolic process	BP	54	2	0.00301902
GO:0070206	protein trimerization	BP	54	2	0.00301902
GO:0010963	regulation of L-arginine import	BP	2	1	0.00302395
GO:0019547	arginine catabolic process to ornithine	BP	2	1	0.00302395
GO:0070947	neutrophil mediated killing of fungus	BP	2	1	0.00302395
GO:0070960	positive regulation of neutrophil mediated cytotoxicity	BP	2	1	0.00302395
GO:0070961	positive regulation of neutrophil mediated killing of symbiont cell	BP	2	1	0.00302395
GO:1900150	regulation of defense response to fungus	BP	2	1	0.00302395
GO:2000866	positive regulation of estradiol secretion	BP	2	1	0.00302395
GO:2000870	regulation of progesterone secretion	BP	2	1	0.00302395
GO:0001694	histamine biosynthetic process	BP	2	1	0.00302395
GO:2000296	negative regulation of hydrogen peroxide catabolic process	BP	2	1	0.00302395
GO:0033212	iron assimilation	BP	2	1	0.00302395
GO:0042710	biofilm formation	BP	2	1	0.00302395
GO:0044010	single-species biofilm formation	BP	2	1	0.00302395
GO:0044407	single-species biofilm formation in or on host organism	BP	2	1	0.00302395
GO:1900190	regulation of single-species biofilm formation	BP	2	1	0.00302395
GO:1900191	negative regulation of single-species biofilm formation	BP	2	1	0.00302395
GO:1900228	regulation of single-species biofilm formation in or on host organism	BP	2	1	0.00302395
GO:1900229	negative regulation of single-species biofilm formation in or on host organism	BP	2	1	0.00302395
GO:1903981	enterobactin binding	MF	2	1	0.00302395
GO:0004053	arginase activity	MF	2	1	0.00302395
GO:0004910	interleukin-1, type II, blocking receptor activity	MF	2	1	0.00302395
GO:0006811	ion transport	BP	1696	8	0.00303974
GO:0016787	hydrolase activity	MF	2533	10	0.00309855
GO:0006576	cellular biogenic amine metabolic process	BP	55	2	0.00313001
GO:0002886	regulation of myeloid leukocyte mediated immunity	BP	55	2	0.00313001
GO:0062023	collagen-containing extracellular matrix	CC	406	4	0.00313063
GO:2000377	regulation of reactive oxygen species metabolic process	BP	195	3	0.0031363
GO:0005764	lysosome	CC	678	5	0.00325361
GO:0000323	lytic vacuole	CC	679	5	0.00327426
GO:0050840	extracellular matrix binding	MF	57	2	0.00335765
GO:0031968	organelle outer membrane	CC	201	3	0.00341544
GO:0007165	signal transduction	BP	6155	17	0.0034313
GO:0031663	lipopolysaccharide-mediated signaling pathway	BP	58	2	0.0034743
GO:0019867	outer membrane	CC	203	3	0.00351177
GO:0043388	positive regulation of DNA binding	BP	59	2	0.00359282
GO:0052548	regulation of endopeptidase activity	BP	425	4	0.00368715
GO:0070555	response to interleukin-1	BP	207	3	0.0037094
GO:0051047	positive regulation of secretion	BP	428	4	0.00378079
GO:0010646	regulation of cell communication	BP	3542	12	0.00382964
GO:0032370	positive regulation of lipid transport	BP	61	2	0.00383549
GO:0006879	cellular iron ion homeostasis	BP	61	2	0.00383549
GO:0045123	cellular extravasation	BP	61	2	0.00383549
GO:0048306	calcium-dependent protein binding	MF	61	2	0.00383549
GO:0097529	myeloid leukocyte migration	BP	210	3	0.00386201
GO:0048608	reproductive structure development	BP	431	4	0.00387604
GO:0061458	reproductive system development	BP	434	4	0.00397292
GO:0046686	response to cadmium ion	BP	63	2	0.0040856
GO:0048518	positive regulation of biological process	BP	6254	17	0.00412699
GO:1900449	regulation of glutamate receptor signaling pathway	BP	64	2	0.00421343
GO:0060135	maternal process involved in female pregnancy	BP	64	2	0.00421343
GO:0023051	regulation of signaling	BP	3591	12	0.0043033
GO:0061134	peptidase regulator activity	MF	219	3	0.00434273
GO:1901605	alpha-amino acid metabolic process	BP	222	3	0.0045107
GO:0044706	multi-multicellular organism process	BP	222	3	0.0045107
GO:0072535	tumor necrosis factor (ligand) superfamily member 11 production	BP	3	1	0.0045326
GO:2000307	regulation of tumor necrosis factor (ligand) superfamily member 11 production	BP	3	1	0.0045326
GO:0070949	regulation of neutrophil mediated killing of symbiont cell	BP	3	1	0.0045326
GO:0035684	helper T cell extravasation	BP	3	1	0.0045326
GO:0035938	estradiol secretion	BP	3	1	0.0045326
GO:2000864	regulation of estradiol secretion	BP	3	1	0.0045326
GO:0016128	phytosteroid metabolic process	BP	3	1	0.0045326
GO:0016129	phytosteroid biosynthetic process	BP	3	1	0.0045326
GO:0015688	iron chelate transport	BP	3	1	0.0045326
GO:0015891	siderophore transport	BP	3	1	0.0045326
GO:2000502	negative regulation of natural killer cell chemotaxis	BP	3	1	0.0045326
GO:2000196	positive regulation of female gonad development	BP	3	1	0.0045326
GO:0006979	response to oxidative stress	BP	451	4	0.00455322
GO:0052547	regulation of peptidase activity	BP	452	4	0.00458905
GO:0005737	cytoplasm	CC	11625	25	0.00470075
GO:1903530	regulation of secretion by cell	BP	753	5	0.00508356
GO:0010647	positive regulation of cell communication	BP	1844	8	0.00508804
GO:0042445	hormone metabolic process	BP	232	3	0.00509895
GO:0051346	negative regulation of hydrolase activity	BP	466	4	0.00511084
GO:0046914	transition metal ion binding	MF	1085	6	0.00512265
GO:0023056	positive regulation of signaling	BP	1851	8	0.00520642
GO:0001568	blood vessel development	BP	761	5	0.00531471
GO:0099601	regulation of neurotransmitter receptor activity	BP	74	2	0.00559232
GO:0009064	glutamine family amino acid metabolic process	BP	74	2	0.00559232
GO:0006508	proteolysis	BP	1874	8	0.00561053
GO:0005773	vacuole	CC	774	5	0.00570621
GO:0035295	tube development	BP	1110	6	0.0057202
GO:0001960	negative regulation of cytokine-mediated signaling pathway	BP	75	2	0.00574015
GO:0150076	neuroinflammatory response	BP	75	2	0.00574015
GO:0048871	multicellular organismal homeostasis	BP	485	4	0.00588112
GO:0007492	endoderm development	BP	76	2	0.00588976
GO:2000552	negative regulation of T-helper 2 cell cytokine production	BP	4	1	0.00603904
GO:0018120	peptidyl-arginine ADP-ribosylation	BP	4	1	0.00603904
GO:0006030	chitin metabolic process	BP	4	1	0.00603904
GO:0006032	chitin catabolic process	BP	4	1	0.00603904
GO:1902732	positive regulation of chondrocyte proliferation	BP	4	1	0.00603904
GO:0033489	cholesterol biosynthetic process via desmosterol	BP	4	1	0.00603904
GO:0033490	cholesterol biosynthetic process via lathosterol	BP	4	1	0.00603904
GO:0042701	progesterone secretion	BP	4	1	0.00603904
GO:0001692	histamine metabolic process	BP	4	1	0.00603904
GO:2000295	regulation of hydrogen peroxide catabolic process	BP	4	1	0.00603904
GO:0043315	positive regulation of neutrophil degranulation	BP	4	1	0.00603904
GO:1902565	positive regulation of neutrophil activation	BP	4	1	0.00603904
GO:0050705	regulation of interleukin-1 alpha secretion	BP	4	1	0.00603904
GO:1901624	negative regulation of lymphocyte chemotaxis	BP	4	1	0.00603904
GO:0032690	negative regulation of interleukin-1 alpha production	BP	4	1	0.00603904
GO:0097013	phagocytic vesicle lumen	CC	4	1	0.00603904
GO:0004568	chitinase activity	MF	4	1	0.00603904
GO:0048678	response to axon injury	BP	77	2	0.00604115
GO:0097237	cellular response to toxic substance	BP	247	3	0.00606486
GO:0001944	vasculature development	BP	792	5	0.00628168
GO:0055072	iron ion homeostasis	BP	79	2	0.00634924
GO:0072358	cardiovascular system development	BP	801	5	0.00658436
GO:0060761	negative regulation of response to cytokine stimulus	BP	81	2	0.00666439
GO:0032501	multicellular organismal process	BP	7751	19	0.00679431
GO:1905954	positive regulation of lipid localization	BP	82	2	0.00682459
GO:0051046	regulation of secretion	BP	811	5	0.00693265
GO:0032412	regulation of ion transmembrane transporter activity	BP	260	3	0.0069851
GO:0006812	cation transport	BP	1160	6	0.00706818
GO:0044092	negative regulation of molecular function	BP	1162	6	0.00712654
GO:0050886	endocrine process	BP	84	2	0.00715024
GO:0048583	regulation of response to stimulus	BP	4342	13	0.00729723
GO:0048646	anatomical structure formation involved in morphogenesis	BP	1173	6	0.00745391
GO:1901652	response to peptide	BP	520	4	0.00749709
GO:0070948	regulation of neutrophil mediated cytotoxicity	BP	5	1	0.00754328
GO:2000697	negative regulation of epithelial cell differentiation involved in kidney development	BP	5	1	0.00754328
GO:0006710	androgen catabolic process	BP	5	1	0.00754328
GO:0019732	antifungal humoral response	BP	5	1	0.00754328
GO:2001205	negative regulation of osteoclast development	BP	5	1	0.00754328
GO:0097368	establishment of Sertoli cell barrier	BP	5	1	0.00754328
GO:2000660	negative regulation of interleukin-1-mediated signaling pathway	BP	5	1	0.00754328
GO:0050703	interleukin-1 alpha secretion	BP	5	1	0.00754328
GO:0044218	other organism cell membrane	CC	5	1	0.00754328
GO:0044279	other organism membrane	CC	5	1	0.00754328
GO:0019834	phospholipase A2 inhibitor activity	MF	5	1	0.00754328
GO:0003956	NAD(P)+-protein-arginine ADP-ribosyltransferase activity	MF	5	1	0.00754328
GO:0031727	CCR2 chemokine receptor binding	MF	5	1	0.00754328
GO:0022898	regulation of transmembrane transporter activity	BP	268	3	0.00759057
GO:0030162	regulation of proteolysis	BP	831	5	0.00766801
GO:0034220	ion transmembrane transport	BP	1182	6	0.00772985
GO:0031012	extracellular matrix	CC	526	4	0.00780084
GO:0050829	defense response to Gram-negative bacterium	BP	88	2	0.00782233
GO:0070098	chemokine-mediated signaling pathway	BP	88	2	0.00782233
GO:0002684	positive regulation of immune system process	BP	1185	6	0.00782347
GO:0023052	signaling	BP	6620	17	0.00784473
GO:0010817	regulation of hormone levels	BP	529	4	0.00795574
GO:0007154	cell communication	BP	6647	17	0.00820568
GO:0016477	cell migration	BP	1592	7	0.00846266
GO:2000117	negative regulation of cysteine-type endopeptidase activity	BP	92	2	0.00852188
GO:0098655	cation transmembrane transport	BP	855	5	0.00862103
GO:1901655	cellular response to ketone	BP	93	2	0.00870102
GO:0033273	response to vitamin	BP	93	2	0.00870102
GO:0032409	regulation of transporter activity	BP	283	3	0.00880778
GO:0005623	cell	CC	17590	31	0.0088131
GO:0004867	serine-type endopeptidase inhibitor activity	MF	94	2	0.00888184
GO:0072593	reactive oxygen species metabolic process	BP	284	3	0.00889278
GO:0051597	response to methylmercury	BP	6	1	0.00904531
GO:0044245	polysaccharide digestion	BP	6	1	0.00904531
GO:1904783	positive regulation of NMDA glutamate receptor activity	BP	6	1	0.00904531
GO:1900157	regulation of bone mineralization involved in bone maturation	BP	6	1	0.00904531
GO:2001268	negative regulation of cysteine-type endopeptidase activity involved in apoptotic signaling pathway	BP	6	1	0.00904531
GO:0008131	primary amine oxidase activity	MF	6	1	0.00904531
GO:0004064	arylesterase activity	MF	6	1	0.00904531
GO:0004896	cytokine receptor activity	MF	96	2	0.00924854
GO:0120162	positive regulation of cold-induced thermogenesis	BP	97	2	0.00943441
GO:1990868	response to chemokine	BP	97	2	0.00943441
GO:1990869	cellular response to chemokine	BP	97	2	0.00943441
GO:0010035	response to inorganic substance	BP	562	4	0.00979574
GO:0070301	cellular response to hydrogen peroxide	BP	99	2	0.00981114
GO:0044403	symbiont process	BP	884	5	0.00987981
GO:2001023	regulation of response to drug	BP	100	2	0.010002
GO:0007215	glutamate receptor signaling pathway	BP	100	2	0.010002
GO:0044437	vacuolar part	CC	567	4	0.0100968
GO:0002694	regulation of leukocyte activation	BP	571	4	0.010342
GO:2000379	positive regulation of reactive oxygen species metabolic process	BP	102	2	0.0103887
GO:0009719	response to endogenous stimulus	BP	1658	7	0.0104881
GO:0034599	cellular response to oxidative stress	BP	302	3	0.010506
GO:0010046	response to mycotoxin	BP	7	1	0.0105451
GO:0060331	negative regulation of response to interferon-gamma	BP	7	1	0.0105451
GO:0060336	negative regulation of interferon-gamma-mediated signaling pathway	BP	7	1	0.0105451
GO:0070944	neutrophil mediated killing of bacterium	BP	7	1	0.0105451
GO:1901072	glucosamine-containing compound catabolic process	BP	7	1	0.0105451
GO:0043615	astrocyte cell migration	BP	7	1	0.0105451
GO:0097577	sequestering of iron ion	BP	7	1	0.0105451
GO:2000659	regulation of interleukin-1-mediated signaling pathway	BP	7	1	0.0105451
GO:0030492	hemoglobin binding	MF	7	1	0.0105451
GO:0004908	interleukin-1 receptor activity	MF	7	1	0.0105451
GO:0018958	phenol-containing compound metabolic process	BP	103	2	0.0105845
GO:0007229	integrin-mediated signaling pathway	BP	103	2	0.0105845
GO:0004222	metalloendopeptidase activity	MF	103	2	0.0105845
GO:0003674	molecular_function	MF	17697	31	0.0106377
GO:0031347	regulation of defense response	BP	901	5	0.0106744
GO:0030593	neutrophil chemotaxis	BP	104	2	0.0107819
GO:0042136	neurotransmitter biosynthetic process	BP	106	2	0.0111817
GO:1901606	alpha-amino acid catabolic process	BP	106	2	0.0111817
GO:0001909	leukocyte mediated cytotoxicity	BP	107	2	0.011384
GO:0046916	cellular transition metal ion homeostasis	BP	108	2	0.0115879
GO:0042127	regulation of cell proliferation	BP	1700	7	0.0119518
GO:0043313	regulation of neutrophil degranulation	BP	8	1	0.0120428
GO:1902023	L-arginine transport	BP	8	1	0.0120428
GO:0060056	mammary gland involution	BP	8	1	0.0120428
GO:1903012	positive regulation of bone development	BP	8	1	0.0120428
GO:2000427	positive regulation of apoptotic cell clearance	BP	8	1	0.0120428
GO:0042420	dopamine catabolic process	BP	8	1	0.0120428
GO:0010727	negative regulation of hydrogen peroxide metabolic process	BP	8	1	0.0120428
GO:0034351	negative regulation of glial cell apoptotic process	BP	8	1	0.0120428
GO:0006548	histidine catabolic process	BP	8	1	0.0120428
GO:0052805	imidazole-containing compound catabolic process	BP	8	1	0.0120428
GO:0032650	regulation of interleukin-1 alpha production	BP	8	1	0.0120428
GO:0032593	insulin-responsive compartment	CC	8	1	0.0120428
GO:0042609	CD4 receptor binding	MF	8	1	0.0120428
GO:0008061	chitin binding	MF	8	1	0.0120428
GO:0044419	interspecies interaction between organisms	BP	932	5	0.0122356
GO:0001938	positive regulation of endothelial cell proliferation	BP	112	2	0.0124198
GO:0048513	animal organ development	BP	3583	11	0.0126674
GO:0051241	negative regulation of multicellular organismal process	BP	1316	6	0.012776
GO:0060349	bone morphogenesis	BP	114	2	0.0128453
GO:0046677	response to antibiotic	BP	327	3	0.0130128
GO:0050865	regulation of cell activation	BP	614	4	0.0132266
GO:0071394	cellular response to testosterone stimulus	BP	9	1	0.0135382
GO:0002725	negative regulation of T cell cytokine production	BP	9	1	0.0135382
GO:0006591	ornithine metabolic process	BP	9	1	0.0135382
GO:0019614	catechol-containing compound catabolic process	BP	9	1	0.0135382
GO:0042424	catecholamine catabolic process	BP	9	1	0.0135382
GO:0048671	negative regulation of collateral sprouting	BP	9	1	0.0135382
GO:0034145	positive regulation of toll-like receptor 4 signaling pathway	BP	9	1	0.0135382
GO:0001553	luteinization	BP	9	1	0.0135382
GO:0032610	interleukin-1 alpha production	BP	9	1	0.0135382
GO:2000501	regulation of natural killer cell chemotaxis	BP	9	1	0.0135382
GO:0019966	interleukin-1 binding	MF	9	1	0.0135382
GO:0048870	cell motility	BP	1751	7	0.0139257
GO:0051674	localization of cell	BP	1751	7	0.0139257
GO:0007159	leukocyte cell-cell adhesion	BP	337	3	0.0141037
GO:0001704	formation of primary germ layer	BP	121	2	0.0143842
GO:0019079	viral genome replication	BP	122	2	0.0146102
GO:1904062	regulation of cation transmembrane transport	BP	342	3	0.0146681
GO:0071621	granulocyte chemotaxis	BP	123	2	0.0148379
GO:0033690	positive regulation of osteoblast proliferation	BP	10	1	0.0150315
GO:0015809	arginine transport	BP	10	1	0.0150315
GO:2000425	regulation of apoptotic cell clearance	BP	10	1	0.0150315
GO:1900122	positive regulation of receptor binding	BP	10	1	0.0150315
GO:2000833	positive regulation of steroid hormone secretion	BP	10	1	0.0150315
GO:2000252	negative regulation of feeding behavior	BP	10	1	0.0150315
GO:0034350	regulation of glial cell apoptotic process	BP	10	1	0.0150315
GO:0006547	histidine metabolic process	BP	10	1	0.0150315
GO:0017128	phospholipid scramblase activity	MF	10	1	0.0150315
GO:0051101	regulation of DNA binding	BP	124	2	0.015067
GO:0051050	positive regulation of transport	BP	982	5	0.0150738
GO:0009966	regulation of signal transduction	BP	3170	10	0.0151889
GO:1901564	organonitrogen compound metabolic process	BP	7040	17	0.0152528
GO:0009063	cellular amino acid catabolic process	BP	125	2	0.0152977
GO:0009725	response to hormone	BP	987	5	0.0153801
GO:0006935	chemotaxis	BP	644	4	0.0155183
GO:0050793	regulation of developmental process	BP	2696	9	0.01556
GO:0042330	taxis	BP	646	4	0.0156795
GO:0010631	epithelial cell migration	BP	351	3	0.0157164
GO:0051260	protein homooligomerization	BP	351	3	0.0157164
GO:0032368	regulation of lipid transport	BP	127	2	0.0157637
GO:0002020	protease binding	MF	128	2	0.0159989
GO:0019955	cytokine binding	MF	128	2	0.0159989
GO:0090132	epithelium migration	BP	354	3	0.0160751
GO:0001505	regulation of neurotransmitter levels	BP	354	3	0.0160751
GO:0044106	cellular amine metabolic process	BP	129	2	0.0162357
GO:0098772	molecular function regulator	MF	1810	7	0.0164956
GO:1901678	iron coordination entity transport	BP	11	1	0.0165225
GO:1902563	regulation of neutrophil activation	BP	11	1	0.0165225
GO:0010269	response to selenium ion	BP	11	1	0.0165225
GO:0044793	negative regulation by host of viral process	BP	11	1	0.0165225
GO:0000050	urea cycle	BP	11	1	0.0165225
GO:0046007	negative regulation of activated T cell proliferation	BP	11	1	0.0165225
GO:2000551	regulation of T-helper 2 cell cytokine production	BP	11	1	0.0165225
GO:2001204	regulation of osteoclast development	BP	11	1	0.0165225
GO:1903980	positive regulation of microglial cell activation	BP	11	1	0.0165225
GO:0046348	amino sugar catabolic process	BP	11	1	0.0165225
GO:0072683	T cell extravasation	BP	11	1	0.0165225
GO:0045217	cell-cell junction maintenance	BP	11	1	0.0165225
GO:0051673	membrane disruption in other organism	BP	11	1	0.0165225
GO:1905941	positive regulation of gonad development	BP	11	1	0.0165225
GO:1903011	negative regulation of bone development	BP	11	1	0.0165225
GO:0035747	natural killer cell chemotaxis	BP	11	1	0.0165225
GO:0031838	haptoglobin-hemoglobin complex	CC	11	1	0.0165225
GO:0016813	hydrolase activity, acting on carbon-nitrogen (but not peptide) bonds, in linear amidines	MF	11	1	0.0165225
GO:0045087	innate immune response	BP	1008	5	0.0167132
GO:0046887	positive regulation of hormone secretion	BP	131	2	0.0167138
GO:0055076	transition metal ion homeostasis	BP	131	2	0.0167138
GO:0005319	lipid transporter activity	MF	131	2	0.0167138
GO:0090130	tissue migration	BP	360	3	0.0168063
GO:0045335	phagocytic vesicle	CC	132	2	0.0169551
GO:0005178	integrin binding	MF	132	2	0.0169551
GO:0002705	positive regulation of leukocyte mediated immunity	BP	133	2	0.0171979
GO:0006869	lipid transport	BP	365	3	0.0174298
GO:0006520	cellular amino acid metabolic process	BP	366	3	0.0175561
GO:0005515	protein binding	MF	11807	24	0.0177758
GO:0051094	positive regulation of developmental process	BP	1418	6	0.0179428
GO:0033197	response to vitamin E	BP	12	1	0.0180114
GO:0060670	branching involved in labyrinthine layer morphogenesis	BP	12	1	0.0180114
GO:0051549	positive regulation of keratinocyte migration	BP	12	1	0.0180114
GO:0006527	arginine catabolic process	BP	12	1	0.0180114
GO:0035630	bone mineralization involved in bone maturation	BP	12	1	0.0180114
GO:0002002	regulation of angiotensin levels in blood	BP	12	1	0.0180114
GO:0002003	angiotensin maturation	BP	12	1	0.0180114
GO:0019336	phenol-containing compound catabolic process	BP	12	1	0.0180114
GO:0052803	imidazole-containing compound metabolic process	BP	12	1	0.0180114
GO:0005751	mitochondrial respiratory chain complex IV	CC	12	1	0.0180114
GO:0004859	phospholipase inhibitor activity	MF	12	1	0.0180114
GO:0003006	developmental process involved in reproduction	BP	676	4	0.0182266
GO:0009611	response to wounding	BP	678	4	0.0184051
GO:0009308	amine metabolic process	BP	138	2	0.0184341
GO:0022414	reproductive process	BP	1429	6	0.0185759
GO:0002831	regulation of response to biotic stimulus	BP	139	2	0.0186857
GO:0000003	reproduction	BP	1432	6	0.0187512
GO:0050678	regulation of epithelial cell proliferation	BP	378	3	0.0191115
GO:0002696	positive regulation of leukocyte activation	BP	380	3	0.0193781
GO:0072672	neutrophil extravasation	BP	13	1	0.0194981
GO:2000194	regulation of female gonad development	BP	13	1	0.0194981
GO:0002829	negative regulation of type 2 immune response	BP	13	1	0.0194981
GO:0019627	urea metabolic process	BP	13	1	0.0194981
GO:0035745	T-helper 2 cell cytokine production	BP	13	1	0.0194981
GO:0048681	negative regulation of axon regeneration	BP	13	1	0.0194981
GO:0031665	negative regulation of lipopolysaccharide-mediated signaling pathway	BP	13	1	0.0194981
GO:0106106	cold-induced thermogenesis	BP	143	2	0.019707
GO:0120161	regulation of cold-induced thermogenesis	BP	143	2	0.019707
GO:0048545	response to steroid hormone	BP	385	3	0.0200534
GO:0043269	regulation of ion transport	BP	699	4	0.0203461
GO:0051384	response to glucocorticoid	BP	146	2	0.020488
GO:0071236	cellular response to antibiotic	BP	147	2	0.0207513
GO:0051547	regulation of keratinocyte migration	BP	14	1	0.0209826
GO:0051712	positive regulation of killing of cells of other organism	BP	14	1	0.0209826
GO:0071941	nitrogen cycle metabolic process	BP	14	1	0.0209826
GO:0060009	Sertoli cell development	BP	14	1	0.0209826
GO:2001044	regulation of integrin-mediated signaling pathway	BP	14	1	0.0209826
GO:0034331	cell junction maintenance	BP	14	1	0.0209826
GO:0050867	positive regulation of cell activation	BP	394	3	0.0213018
GO:0051604	protein maturation	BP	397	3	0.0217273
GO:0032879	regulation of localization	BP	2853	9	0.0219565
GO:0001890	placenta development	BP	152	2	0.0220887
GO:0005506	iron ion binding	MF	152	2	0.0220887
GO:0010876	lipid localization	BP	400	3	0.0221575
GO:0001817	regulation of cytokine production	BP	719	4	0.0223095
GO:0015802	basic amino acid transport	BP	15	1	0.022465
GO:2000402	negative regulation of lymphocyte migration	BP	15	1	0.022465
GO:0034349	glial cell apoptotic process	BP	15	1	0.022465
GO:0044406	adhesion of symbiont to host	BP	15	1	0.022465
GO:0070571	negative regulation of neuron projection regeneration	BP	15	1	0.022465
GO:0051770	positive regulation of nitric-oxide synthase biosynthetic process	BP	15	1	0.022465
GO:0004089	carbonate dehydratase activity	MF	15	1	0.022465
GO:1990845	adaptive thermogenesis	BP	154	2	0.0226335
GO:0045216	cell-cell junction organization	BP	156	2	0.0231839
GO:0010942	positive regulation of cell death	BP	730	4	0.0234377
GO:1905952	regulation of lipid localization	BP	157	2	0.0234612
GO:0065007	biological regulation	BP	12777	25	0.023876
GO:0042447	hormone catabolic process	BP	16	1	0.0239452
GO:1900451	positive regulation of glutamate receptor signaling pathway	BP	16	1	0.0239452
GO:0050711	negative regulation of interleukin-1 secretion	BP	16	1	0.0239452
GO:0072488	ammonium transmembrane transport	BP	16	1	0.0239452
GO:0051238	sequestering of metal ion	BP	16	1	0.0239452
GO:0016641	oxidoreductase activity, acting on the CH-NH2 group of donors, oxygen as acceptor	MF	16	1	0.0239452
GO:0070848	response to growth factor	BP	736	4	0.0240676
GO:0032680	regulation of tumor necrosis factor production	BP	160	2	0.0243013
GO:0031960	response to corticosteroid	BP	162	2	0.0248682
GO:0032269	negative regulation of cellular protein metabolic process	BP	1119	5	0.0250617
GO:0032640	tumor necrosis factor production	BP	163	2	0.0251537
GO:1903555	regulation of tumor necrosis factor superfamily cytokine production	BP	163	2	0.0251537
GO:0031214	biomineral tissue development	BP	163	2	0.0251537
GO:0048521	negative regulation of behavior	BP	17	1	0.0254232
GO:2001267	regulation of cysteine-type endopeptidase activity involved in apoptotic signaling pathway	BP	17	1	0.0254232
GO:0051709	regulation of killing of cells of other organism	BP	17	1	0.0254232
GO:0090185	negative regulation of kidney development	BP	17	1	0.0254232
GO:0035988	chondrocyte proliferation	BP	17	1	0.0254232
GO:0032780	negative regulation of ATPase activity	BP	17	1	0.0254232
GO:0017121	phospholipid scrambling	BP	17	1	0.0254232
GO:0055102	lipase inhibitor activity	MF	17	1	0.0254232
GO:0040011	locomotion	BP	1977	7	0.0256143
GO:0044877	protein-containing complex binding	MF	1134	5	0.0263659
GO:0050806	positive regulation of synaptic transmission	BP	168	2	0.0266013
GO:0071706	tumor necrosis factor superfamily cytokine production	BP	168	2	0.0266013
GO:0008201	heparin binding	MF	169	2	0.0268948
GO:0045780	positive regulation of bone resorption	BP	18	1	0.026899
GO:0046852	positive regulation of bone remodeling	BP	18	1	0.026899
GO:0032693	negative regulation of interleukin-10 production	BP	18	1	0.026899
GO:0036035	osteoclast development	BP	18	1	0.026899
GO:0150078	positive regulation of neuroinflammatory response	BP	18	1	0.026899
GO:0031225	anchored component of membrane	CC	170	2	0.0271897
GO:0050673	epithelial cell proliferation	BP	434	3	0.0273615
GO:0010634	positive regulation of epithelial cell migration	BP	171	2	0.0274858
GO:0043434	response to peptide hormone	BP	436	3	0.0276865
GO:0030324	lung development	BP	172	2	0.0277833
GO:0001659	temperature homeostasis	BP	173	2	0.0280821
GO:0010469	regulation of signaling receptor activity	BP	173	2	0.0280821
GO:0030659	cytoplasmic vesicle membrane	CC	773	4	0.0281826
GO:0022603	regulation of anatomical structure morphogenesis	BP	1155	5	0.028265
GO:0032930	positive regulation of superoxide anion generation	BP	19	1	0.0283727
GO:2000831	regulation of steroid hormone secretion	BP	19	1	0.0283727
GO:0001991	regulation of systemic arterial blood pressure by circulatory renin-angiotensin	BP	19	1	0.0283727
GO:1905939	regulation of gonad development	BP	19	1	0.0283727
GO:0051546	keratinocyte migration	BP	19	1	0.0283727
GO:0002710	negative regulation of T cell mediated immunity	BP	19	1	0.0283727
GO:0033189	response to vitamin A	BP	19	1	0.0283727
GO:0002689	negative regulation of leukocyte chemotaxis	BP	19	1	0.0283727
GO:2000696	regulation of epithelial cell differentiation involved in kidney development	BP	19	1	0.0283727
GO:0008283	cell proliferation	BP	2024	7	0.028717
GO:0006986	response to unfolded protein	BP	176	2	0.0289864
GO:0030323	respiratory tube development	BP	176	2	0.0289864
GO:0001959	regulation of cytokine-mediated signaling pathway	BP	177	2	0.0292904
GO:0072359	circulatory system development	BP	1169	5	0.029579
GO:0005741	mitochondrial outer membrane	CC	178	2	0.0295957
GO:0060008	Sertoli cell differentiation	BP	20	1	0.0298442
GO:0010042	response to manganese ion	BP	20	1	0.0298442
GO:0043931	ossification involved in bone maturation	BP	20	1	0.0298442
GO:1903978	regulation of microglial cell activation	BP	20	1	0.0298442
GO:0048670	regulation of collateral sprouting	BP	20	1	0.0298442
GO:0051767	nitric-oxide synthase biosynthetic process	BP	20	1	0.0298442
GO:0051769	regulation of nitric-oxide synthase biosynthetic process	BP	20	1	0.0298442
GO:0034143	regulation of toll-like receptor 4 signaling pathway	BP	20	1	0.0298442
GO:0045277	respiratory chain complex IV	CC	20	1	0.0298442
GO:0016638	oxidoreductase activity, acting on the CH-NH2 group of donors	MF	20	1	0.0298442
GO:0051099	positive regulation of binding	BP	179	2	0.0299023
GO:0048771	tissue remodeling	BP	179	2	0.0299023
GO:2001235	positive regulation of apoptotic signaling pathway	BP	179	2	0.0299023
GO:0001816	cytokine production	BP	790	4	0.0302076
GO:0071346	cellular response to interferon-gamma	BP	180	2	0.0302102
GO:0055085	transmembrane transport	BP	1598	6	0.0303454
GO:0008237	metallopeptidase activity	MF	181	2	0.0305193
GO:0012506	vesicle membrane	CC	794	4	0.0306965
GO:0042135	neurotransmitter catabolic process	BP	21	1	0.0313136
GO:1900016	negative regulation of cytokine production involved in inflammatory response	BP	21	1	0.0313136
GO:0060713	labyrinthine layer morphogenesis	BP	21	1	0.0313136
GO:0009713	catechol-containing compound biosynthetic process	BP	21	1	0.0313136
GO:0042423	catecholamine biosynthetic process	BP	21	1	0.0313136
GO:0035743	CD4-positive, alpha-beta T cell cytokine production	BP	21	1	0.0313136
GO:0036499	PERK-mediated unfolded protein response	BP	21	1	0.0313136
GO:0090280	positive regulation of calcium ion import	BP	21	1	0.0313136
GO:0010310	regulation of hydrogen peroxide metabolic process	BP	21	1	0.0313136
GO:1904469	positive regulation of tumor necrosis factor secretion	BP	21	1	0.0313136
GO:0048245	eosinophil chemotaxis	BP	21	1	0.0313136
GO:0051248	negative regulation of protein metabolic process	BP	1188	5	0.0314246
GO:0009888	tissue development	BP	2065	7	0.03163
GO:0007369	gastrulation	BP	185	2	0.0317686
GO:0001667	ameboidal-type cell migration	BP	461	3	0.0319236
GO:0002683	negative regulation of immune system process	BP	463	3	0.0322767
GO:0016829	lyase activity	MF	187	2	0.0324008
GO:0032928	regulation of superoxide anion generation	BP	22	1	0.0327808
GO:0051195	negative regulation of cofactor metabolic process	BP	22	1	0.0327808
GO:0035929	steroid hormone secretion	BP	22	1	0.0327808
GO:0003950	NAD+ ADP-ribosyltransferase activity	MF	22	1	0.0327808
GO:0098588	bounding membrane of organelle	CC	2081	7	0.0328202
GO:0060759	regulation of response to cytokine stimulus	BP	190	2	0.0333585
GO:0006897	endocytosis	BP	820	4	0.0339901
GO:0042401	cellular biogenic amine biosynthetic process	BP	23	1	0.0342458
GO:0070977	bone maturation	BP	23	1	0.0342458
GO:0034123	positive regulation of toll-like receptor signaling pathway	BP	23	1	0.0342458
GO:0016493	C-C chemokine receptor activity	MF	23	1	0.0342458
GO:1901654	response to ketone	BP	193	2	0.0343273
GO:0030027	lamellipodium	CC	193	2	0.0343273
GO:0080134	regulation of response to stress	BP	1645	6	0.0343452
GO:0002682	regulation of immune system process	BP	1659	6	0.0356011
GO:0009309	amine biosynthetic process	BP	24	1	0.0357087
GO:0043302	positive regulation of leukocyte degranulation	BP	24	1	0.0357087
GO:0002227	innate immune response in mucosa	BP	24	1	0.0357087
GO:0042832	defense response to protozoan	BP	24	1	0.0357087
GO:1903010	regulation of bone development	BP	24	1	0.0357087
GO:0046697	decidualization	BP	24	1	0.0357087
GO:0003433	chondrocyte development involved in endochondral bone morphogenesis	BP	24	1	0.0357087
GO:1901071	glucosamine-containing compound metabolic process	BP	24	1	0.0357087
GO:2000178	negative regulation of neural precursor cell proliferation	BP	24	1	0.0357087
GO:0019957	C-C chemokine binding	MF	24	1	0.0357087
GO:0048018	receptor ligand activity	MF	482	3	0.0357336
GO:0034765	regulation of ion transmembrane transport	BP	483	3	0.0359207
GO:0060541	respiratory system development	BP	198	2	0.0359663
GO:0031099	regeneration	BP	198	2	0.0359663
GO:0022604	regulation of cell morphogenesis	BP	484	3	0.0361083
GO:0050727	regulation of inflammatory response	BP	485	3	0.0362964
GO:0035966	response to topologically incorrect protein	BP	199	2	0.0362977
GO:0034341	response to interferon-gamma	BP	199	2	0.0362977
GO:0098609	cell-cell adhesion	BP	839	4	0.0365247
GO:0009056	catabolic process	BP	2615	8	0.0368537
GO:0002703	regulation of leukocyte mediated immunity	BP	201	2	0.0369641
GO:0072677	eosinophil migration	BP	25	1	0.0371695
GO:0002719	negative regulation of cytokine production involved in immune response	BP	25	1	0.0371695
GO:2000353	positive regulation of endothelial cell apoptotic process	BP	25	1	0.0371695
GO:0001562	response to protozoan	BP	25	1	0.0371695
GO:0060330	regulation of response to interferon-gamma	BP	25	1	0.0371695
GO:0060334	regulation of interferon-gamma-mediated signaling pathway	BP	25	1	0.0371695
GO:0031664	regulation of lipopolysaccharide-mediated signaling pathway	BP	25	1	0.0371695
GO:0045766	positive regulation of angiogenesis	BP	204	2	0.0379727
GO:0002573	myeloid leukocyte differentiation	BP	204	2	0.0379727
GO:0009967	positive regulation of signal transduction	BP	1685	6	0.0380135
GO:0017144	drug metabolic process	BP	851	4	0.0381814
GO:0097164	ammonium ion metabolic process	BP	205	2	0.0383113
GO:0071377	cellular response to glucagon stimulus	BP	26	1	0.0386281
GO:0060669	embryonic placenta morphogenesis	BP	26	1	0.0386281
GO:0003081	regulation of systemic arterial blood pressure by renin-angiotensin	BP	26	1	0.0386281
GO:1900120	regulation of receptor binding	BP	26	1	0.0386281
GO:0005640	nuclear outer membrane	CC	26	1	0.0386281
GO:0001637	G protein-coupled chemoattractant receptor activity	MF	26	1	0.0386281
GO:0004950	chemokine receptor activity	MF	26	1	0.0386281
GO:0016628	oxidoreductase activity, acting on the CH-CH group of donors, NAD or NADP as acceptor	MF	26	1	0.0386281
GO:0050679	positive regulation of epithelial cell proliferation	BP	206	2	0.038651
GO:0048585	negative regulation of response to stimulus	BP	1693	6	0.0387769
GO:2000026	regulation of multicellular organismal development	BP	2157	7	0.038896
GO:0031667	response to nutrient levels	BP	499	3	0.0389843
GO:0050900	leukocyte migration	BP	499	3	0.0389843
GO:0050839	cell adhesion molecule binding	MF	499	3	0.0389843
GO:0050794	regulation of cellular process	BP	11022	22	0.0393449
GO:0050707	regulation of cytokine secretion	BP	210	2	0.0400215
GO:0048668	collateral sprouting	BP	27	1	0.0400846
GO:1901623	regulation of lymphocyte chemotaxis	BP	27	1	0.0400846
GO:0000272	polysaccharide catabolic process	BP	27	1	0.0400846
GO:0060259	regulation of feeding behavior	BP	27	1	0.0400846
GO:0006730	one-carbon metabolic process	BP	27	1	0.0400846
GO:0006706	steroid catabolic process	BP	27	1	0.0400846
GO:0048799	animal organ maturation	BP	27	1	0.0400846
GO:0018195	peptidyl-arginine modification	BP	27	1	0.0400846
GO:0043032	positive regulation of macrophage activation	BP	27	1	0.0400846
GO:0045671	negative regulation of osteoclast differentiation	BP	27	1	0.0400846
GO:1905563	negative regulation of vascular endothelial cell proliferation	BP	27	1	0.0400846
GO:0048037	cofactor binding	MF	506	3	0.0403658
GO:0030154	cell differentiation	BP	4239	11	0.0408543
GO:0015893	drug transport	BP	214	2	0.0414105
GO:0033688	regulation of osteoblast proliferation	BP	28	1	0.0415389
GO:0008209	androgen metabolic process	BP	28	1	0.0415389
GO:2001025	positive regulation of response to drug	BP	28	1	0.0415389
GO:0009065	glutamine family amino acid catabolic process	BP	28	1	0.0415389
GO:0009074	aromatic amino acid family catabolic process	BP	28	1	0.0415389
GO:0048679	regulation of axon regeneration	BP	28	1	0.0415389
GO:0004129	cytochrome-c oxidase activity	MF	28	1	0.0415389
GO:0015002	heme-copper terminal oxidase activity	MF	28	1	0.0415389
GO:0016676	oxidoreductase activity, acting on a heme group of donors, oxygen as acceptor	MF	28	1	0.0415389
GO:0002699	positive regulation of immune effector process	BP	216	2	0.0421119
GO:0060348	bone development	BP	217	2	0.0424642
GO:0008406	gonad development	BP	217	2	0.0424642
GO:0001501	skeletal system development	BP	518	3	0.0427922
GO:0044788	modulation by host of viral process	BP	29	1	0.0429911
GO:0043236	laminin binding	MF	29	1	0.0429911
GO:0043539	protein serine/threonine kinase activator activity	MF	29	1	0.0429911
GO:0016675	oxidoreductase activity, acting on a heme group of donors	MF	29	1	0.0429911
GO:0007584	response to nutrient	BP	219	2	0.0431723
GO:0048856	anatomical structure development	BP	5988	14	0.043374
GO:0031349	positive regulation of defense response	BP	521	3	0.0434102
GO:0051336	regulation of hydrolase activity	BP	1297	5	0.0434331
GO:0005125	cytokine activity	MF	220	2	0.0435281
GO:0006928	movement of cell or subcellular component	BP	2213	7	0.0438324
GO:0009636	response to toxic substance	BP	525	3	0.0442412
GO:0043903	regulation of symbiosis, encompassing mutualism through parasitism	BP	222	2	0.0442428
GO:0071549	cellular response to dexamethasone stimulus	BP	30	1	0.0444412
GO:0002828	regulation of type 2 immune response	BP	30	1	0.0444412
GO:0003413	chondrocyte differentiation involved in endochondral bone morphogenesis	BP	30	1	0.0444412
GO:0090200	positive regulation of release of cytochrome c from mitochondria	BP	30	1	0.0444412
GO:0008519	ammonium transmembrane transporter activity	MF	30	1	0.0444412
GO:0045137	development of primary sexual characteristics	BP	223	2	0.0446019
GO:0008152	metabolic process	BP	12552	24	0.0446528
GO:0097191	extrinsic apoptotic signaling pathway	BP	224	2	0.044962
GO:0030595	leukocyte chemotaxis	BP	224	2	0.044962
GO:0030545	receptor regulator activity	MF	530	3	0.0452914
GO:0001649	osteoblast differentiation	BP	225	2	0.0453233
GO:0009991	response to extracellular stimulus	BP	531	3	0.0455029
GO:0033687	osteoblast proliferation	BP	31	1	0.0458892
GO:0045742	positive regulation of epidermal growth factor receptor signaling pathway	BP	31	1	0.0458892
GO:0002724	regulation of T cell cytokine production	BP	31	1	0.0458892
GO:0035767	endothelial cell chemotaxis	BP	31	1	0.0458892
GO:0008305	integrin complex	CC	31	1	0.0458892
GO:0001894	tissue homeostasis	BP	227	2	0.0460491
GO:1901615	organic hydroxy compound metabolic process	BP	535	3	0.0463541
GO:0044446	intracellular organelle part	CC	9811	20	0.0466325
GO:0005539	glycosaminoglycan binding	MF	229	2	0.0467792
GO:1904018	positive regulation of vasculature development	BP	230	2	0.0471459
GO:0051968	positive regulation of synaptic transmission, glutamatergic	BP	32	1	0.047335
GO:0060674	placenta blood vessel development	BP	32	1	0.047335
GO:0071353	cellular response to interleukin-4	BP	32	1	0.047335
GO:0042744	hydrogen peroxide catabolic process	BP	32	1	0.047335
GO:1904467	regulation of tumor necrosis factor secretion	BP	32	1	0.047335
GO:0070570	regulation of neuron projection regeneration	BP	32	1	0.047335
GO:0019956	chemokine binding	MF	32	1	0.047335
GO:0014070	response to organic cyclic compound	BP	915	4	0.0477522
GO:0071407	cellular response to organic cyclic compound	BP	542	3	0.0478629
GO:0035239	tube morphogenesis	BP	920	4	0.0485522
GO:0022411	cellular component disassembly	BP	546	3	0.0487361
GO:0007275	multicellular organism development	BP	5491	13	0.048768
GO:0051955	regulation of amino acid transport	BP	33	1	0.0487787
GO:1901186	positive regulation of ERBB signaling pathway	BP	33	1	0.0487787
GO:0006471	protein ADP-ribosylation	BP	33	1	0.0487787
GO:0010737	protein kinase A signaling	BP	33	1	0.0487787
GO:0016486	peptide hormone processing	BP	33	1	0.0487787
GO:0044464	cell part	CC	17521	30	0.0488248
GO:0048731	system development	BP	4918	12	0.0488355
GO:0070670	response to interleukin-4	BP	34	1	0.0502203
GO:0009925	basal plasma membrane	CC	34	1	0.0502203
GO:0070069	cytochrome complex	CC	34	1	0.0502203
GO:0098636	protein complex involved in cell adhesion	CC	34	1	0.0502203
GO:0031348	negative regulation of defense response	BP	239	2	0.0504939
GO:0048705	skeletal system morphogenesis	BP	239	2	0.0504939
GO:2000116	regulation of cysteine-type endopeptidase activity	BP	239	2	0.0504939
GO:0050663	cytokine secretion	BP	240	2	0.0508711
GO:0071702	organic substance transport	BP	2791	8	0.051412
GO:0001893	maternal placenta development	BP	35	1	0.0516598
GO:0002701	negative regulation of production of molecular mediator of immune response	BP	35	1	0.0516598
GO:0042092	type 2 immune response	BP	35	1	0.0516598
GO:0098751	bone cell development	BP	35	1	0.0516598
GO:1990774	tumor necrosis factor secretion	BP	35	1	0.0516598
GO:0051354	negative regulation of oxidoreductase activity	BP	35	1	0.0516598
GO:0034142	toll-like receptor 4 signaling pathway	BP	35	1	0.0516598
GO:0016831	carboxy-lyase activity	MF	35	1	0.0516598
GO:0001530	lipopolysaccharide binding	MF	35	1	0.0516598
GO:0098657	import into cell	BP	945	4	0.0526657
GO:0042554	superoxide anion generation	BP	36	1	0.0530972
GO:0090322	regulation of superoxide metabolic process	BP	36	1	0.0530972
GO:0033762	response to glucagon	BP	36	1	0.0530972
GO:0002385	mucosal immune response	BP	36	1	0.0530972
GO:0034762	regulation of transmembrane transport	BP	568	3	0.0536798
GO:0051259	protein complex oligomerization	BP	568	3	0.0536798
GO:0008284	positive regulation of cell proliferation	BP	951	4	0.0536811
GO:0060284	regulation of cell development	BP	953	4	0.054022
GO:0048869	cellular developmental process	BP	4431	11	0.0543666
GO:1900026	positive regulation of substrate adhesion-dependent cell spreading	BP	37	1	0.0545324
GO:2000273	positive regulation of signaling receptor activity	BP	37	1	0.0545324
GO:0046006	regulation of activated T cell proliferation	BP	37	1	0.0545324
GO:0071276	cellular response to cadmium ion	BP	37	1	0.0545324
GO:0033280	response to vitamin D	BP	37	1	0.0545324
GO:1901681	sulfur compound binding	MF	250	2	0.0546999
GO:0050790	regulation of catalytic activity	BP	2328	7	0.0552435
GO:1904037	positive regulation of epithelial cell apoptotic process	BP	38	1	0.0559656
GO:0002707	negative regulation of lymphocyte mediated immunity	BP	38	1	0.0559656
GO:0048246	macrophage chemotaxis	BP	38	1	0.0559656
GO:0006040	amino sugar metabolic process	BP	38	1	0.0559656
GO:0008150	biological_process	BP	18670	31	0.0559792
GO:0071495	cellular response to endogenous stimulus	BP	1393	5	0.0560742
GO:0006875	cellular metal ion homeostasis	BP	579	3	0.0562405
GO:0019725	cellular homeostasis	BP	970	4	0.0569683
GO:0007187	G protein-coupled receptor signaling pathway, coupled to cyclic nucleotide second messenger	BP	256	2	0.0570454
GO:0042417	dopamine metabolic process	BP	39	1	0.0573967
GO:0032692	negative regulation of interleukin-1 production	BP	39	1	0.0573967
GO:0030501	positive regulation of bone mineralization	BP	39	1	0.0573967
GO:0002251	organ or tissue specific immune response	BP	39	1	0.0573967
GO:0033574	response to testosterone	BP	39	1	0.0573967
GO:0009072	aromatic amino acid family metabolic process	BP	39	1	0.0573967
GO:0048598	embryonic morphogenesis	BP	586	3	0.0579005
GO:0001525	angiogenesis	BP	587	3	0.0581396
GO:0045124	regulation of bone resorption	BP	40	1	0.0588256
GO:0001990	regulation of systemic arterial blood pressure by hormone	BP	40	1	0.0588256
GO:0071548	response to dexamethasone	BP	40	1	0.0588256
GO:0002369	T cell cytokine production	BP	40	1	0.0588256
GO:0002823	negative regulation of adaptive immune response based on somatic recombination of immune receptors built from immunoglobulin superfamily domains	BP	40	1	0.0588256
GO:0005886	plasma membrane	CC	5637	13	0.0590122
GO:0051091	positive regulation of DNA-binding transcription factor activity	BP	261	2	0.0590268
GO:0050789	regulation of biological process	BP	12093	23	0.0596144
GO:0010955	negative regulation of protein processing	BP	41	1	0.0602525
GO:1903318	negative regulation of protein maturation	BP	41	1	0.0602525
GO:0050798	activated T cell proliferation	BP	41	1	0.0602525
GO:0090279	regulation of calcium ion import	BP	41	1	0.0602525
GO:0046883	regulation of hormone secretion	BP	266	2	0.0610322
GO:0015701	bicarbonate transport	BP	42	1	0.0616772
GO:0097190	apoptotic signaling pathway	BP	602	3	0.0617829
GO:0010243	response to organonitrogen compound	BP	998	4	0.0620106
GO:0031090	organelle membrane	CC	2903	8	0.0624597
GO:0007548	sex differentiation	BP	270	2	0.0626535
GO:1901617	organic hydroxy compound biosynthetic process	BP	271	2	0.0630612
GO:0045429	positive regulation of nitric oxide biosynthetic process	BP	43	1	0.0630999
GO:0045687	positive regulation of glial cell differentiation	BP	43	1	0.0630999
GO:0030866	cortical actin cytoskeleton organization	BP	43	1	0.0630999
GO:0048020	CCR chemokine receptor binding	MF	43	1	0.0630999
GO:0032868	response to insulin	BP	272	2	0.0634697
GO:0043542	endothelial cell migration	BP	273	2	0.0638792
GO:0098742	cell-cell adhesion via plasma-membrane adhesion molecules	BP	273	2	0.0638792
GO:0042592	homeostatic process	BP	1916	6	0.0642007
GO:0035850	epithelial cell differentiation involved in kidney development	BP	44	1	0.0645205
GO:0034105	positive regulation of tissue remodeling	BP	44	1	0.0645205
GO:0030225	macrophage differentiation	BP	44	1	0.0645205
GO:0044060	regulation of endocrine process	BP	44	1	0.0645205
GO:1904407	positive regulation of nitric oxide metabolic process	BP	44	1	0.0645205
GO:0046189	phenol-containing compound biosynthetic process	BP	44	1	0.0645205
GO:0016054	organic acid catabolic process	BP	275	2	0.0647009
GO:0046395	carboxylic acid catabolic process	BP	275	2	0.0647009
GO:0044422	organelle part	CC	10112	20	0.0650139
GO:0001934	positive regulation of protein phosphorylation	BP	1017	4	0.0655659
GO:0032456	endocytic recycling	BP	45	1	0.065939
GO:0002820	negative regulation of adaptive immune response	BP	45	1	0.065939
GO:0002833	positive regulation of response to biotic stimulus	BP	45	1	0.065939
GO:0042493	response to drug	BP	1021	4	0.0663281
GO:0030100	regulation of endocytosis	BP	281	2	0.0671878
GO:0043300	regulation of leukocyte degranulation	BP	46	1	0.0673554
GO:0014075	response to amine	BP	46	1	0.0673554
GO:1900015	regulation of cytokine production involved in inflammatory response	BP	46	1	0.0673554
GO:0060711	labyrinthine layer development	BP	46	1	0.0673554
GO:0022602	ovulation cycle process	BP	46	1	0.0673554
GO:0043277	apoptotic cell clearance	BP	46	1	0.0673554
GO:0060443	mammary gland morphogenesis	BP	46	1	0.0673554
GO:0006984	ER-nucleus signaling pathway	BP	46	1	0.0673554
GO:0016020	membrane	CC	9495	19	0.0682098
GO:0071944	cell periphery	CC	5756	13	0.0684445
GO:0030234	enzyme regulator activity	MF	1032	4	0.0684487
GO:0006953	acute-phase response	BP	47	1	0.0687698
GO:0051181	cofactor transport	BP	47	1	0.0687698
GO:0070169	positive regulation of biomineral tissue development	BP	47	1	0.0687698
GO:0060986	endocrine hormone secretion	BP	47	1	0.0687698
GO:0035722	interleukin-12-mediated signaling pathway	BP	47	1	0.0687698
GO:0060351	cartilage development involved in endochondral bone morphogenesis	BP	47	1	0.0687698
GO:0002832	negative regulation of response to biotic stimulus	BP	47	1	0.0687698
GO:0016763	transferase activity, transferring pentosyl groups	MF	47	1	0.0687698
GO:0046850	regulation of bone remodeling	BP	48	1	0.070182
GO:0002063	chondrocyte development	BP	48	1	0.070182
GO:0001774	microglial cell activation	BP	48	1	0.070182
GO:0002269	leukocyte activation involved in inflammatory response	BP	48	1	0.070182
GO:0090199	regulation of release of cytochrome c from mitochondria	BP	48	1	0.070182
GO:0002762	negative regulation of myeloid leukocyte differentiation	BP	48	1	0.070182
GO:0044764	multi-organism cellular process	BP	48	1	0.070182
GO:0030865	cortical cytoskeleton organization	BP	48	1	0.070182
GO:0101023	vascular endothelial cell proliferation	BP	48	1	0.070182
GO:1905562	regulation of vascular endothelial cell proliferation	BP	48	1	0.070182
GO:0034330	cell junction organization	BP	290	2	0.0709778
GO:0042063	gliogenesis	BP	290	2	0.0709778
GO:0010632	regulation of epithelial cell migration	BP	291	2	0.0714032
GO:0071356	cellular response to tumor necrosis factor	BP	291	2	0.0714032
GO:0050662	coenzyme binding	MF	291	2	0.0714032
GO:0002686	negative regulation of leukocyte migration	BP	49	1	0.0715922
GO:0002704	negative regulation of leukocyte mediated immunity	BP	49	1	0.0715922
GO:0030857	negative regulation of epithelial cell differentiation	BP	49	1	0.0715922
GO:0002534	cytokine production involved in inflammatory response	BP	49	1	0.0715922
GO:0003044	regulation of systemic arterial blood pressure mediated by a chemical signal	BP	49	1	0.0715922
GO:1904707	positive regulation of vascular smooth muscle cell proliferation	BP	49	1	0.0715922
GO:2001238	positive regulation of extrinsic apoptotic signaling pathway	BP	49	1	0.0715922
GO:0071349	cellular response to interleukin-12	BP	49	1	0.0715922
GO:0008347	glial cell migration	BP	49	1	0.0715922
GO:0008009	chemokine activity	MF	49	1	0.0715922
GO:0065009	regulation of molecular function	BP	2989	8	0.0719283
GO:0097035	regulation of membrane lipid distribution	BP	50	1	0.0730003
GO:0045540	regulation of cholesterol biosynthetic process	BP	50	1	0.0730003
GO:0106118	regulation of sterol biosynthetic process	BP	50	1	0.0730003
GO:0070671	response to interleukin-12	BP	50	1	0.0730003
GO:0032502	developmental process	BP	6411	14	0.0732815
GO:0005488	binding	MF	15267	27	0.0739616
GO:0030667	secretory granule membrane	CC	298	2	0.074405
GO:2001258	negative regulation of cation channel activity	BP	51	1	0.0744064
GO:0031103	axon regeneration	BP	51	1	0.0744064
GO:0045178	basal part of cell	CC	51	1	0.0744064
GO:0016830	carbon-carbon lyase activity	MF	51	1	0.0744064
GO:0030003	cellular cation homeostasis	BP	652	3	0.0746865
GO:0055065	metal ion homeostasis	BP	653	3	0.0749562
GO:0009887	animal organ morphogenesis	BP	1068	4	0.0756382
GO:0042327	positive regulation of phosphorylation	BP	1068	4	0.0756382
GO:0010769	regulation of cell morphogenesis involved in differentiation	BP	301	2	0.0757041
GO:1900024	regulation of substrate adhesion-dependent cell spreading	BP	52	1	0.0758104
GO:0032653	regulation of interleukin-10 production	BP	52	1	0.0758104
GO:0005548	phospholipid transporter activity	MF	52	1	0.0758104
GO:0050661	NADP binding	MF	52	1	0.0758104
GO:1903037	regulation of leukocyte cell-cell adhesion	BP	304	2	0.0770105
GO:0010043	response to zinc ion	BP	53	1	0.0772123
GO:0006968	cellular defense response	BP	53	1	0.0772123
GO:1903307	positive regulation of regulated secretory pathway	BP	53	1	0.0772123
GO:0050704	regulation of interleukin-1 secretion	BP	53	1	0.0772123
GO:1905517	macrophage migration	BP	53	1	0.0772123
GO:0005544	calcium-dependent phospholipid binding	MF	53	1	0.0772123
GO:0006873	cellular ion homeostasis	BP	665	3	0.0782272
GO:0061005	cell differentiation involved in kidney development	BP	54	1	0.0786122
GO:1904645	response to amyloid-beta	BP	54	1	0.0786122
GO:0030199	collagen fibril organization	BP	54	1	0.0786122
GO:0030170	pyridoxal phosphate binding	MF	54	1	0.0786122
GO:0070279	vitamin B6 binding	MF	54	1	0.0786122
GO:0005788	endoplasmic reticulum lumen	CC	309	2	0.079204
GO:0009987	cellular process	BP	16968	29	0.0793651
GO:1901698	response to nitrogen compound	BP	1089	4	0.0800069
GO:0070830	bicellular tight junction assembly	BP	55	1	0.08001
GO:0032613	interleukin-10 production	BP	55	1	0.08001
GO:0043954	cellular component maintenance	BP	55	1	0.08001
GO:0043030	regulation of macrophage activation	BP	55	1	0.08001
GO:0043065	positive regulation of apoptotic process	BP	672	3	0.0801647
GO:0046879	hormone secretion	BP	312	2	0.0805297
GO:0034612	response to tumor necrosis factor	BP	312	2	0.0805297
GO:0120192	tight junction assembly	BP	56	1	0.0814058
GO:0001912	positive regulation of leukocyte mediated cytotoxicity	BP	56	1	0.0814058
GO:0090183	regulation of kidney development	BP	56	1	0.0814058
GO:0016836	hydro-lyase activity	MF	56	1	0.0814058
GO:0050863	regulation of T cell activation	BP	314	2	0.0814174
GO:0045121	membrane raft	CC	315	2	0.0818624
GO:0016043	cellular component organization	BP	6512	14	0.0821884
GO:0098857	membrane microdomain	CC	316	2	0.0823082
GO:0043068	positive regulation of programmed cell death	BP	680	3	0.082405
GO:0048514	blood vessel morphogenesis	BP	681	3	0.082687
GO:1903428	positive regulation of reactive oxygen species biosynthetic process	BP	57	1	0.0827995
GO:0042743	hydrogen peroxide metabolic process	BP	57	1	0.0827995
GO:0016328	lateral plasma membrane	CC	57	1	0.0827995
GO:0071385	cellular response to glucocorticoid stimulus	BP	58	1	0.0841912
GO:0017001	antibiotic catabolic process	BP	58	1	0.0841912
GO:0061900	glial cell activation	BP	58	1	0.0841912
GO:0035577	azurophil granule membrane	CC	58	1	0.0841912
GO:0016627	oxidoreductase activity, acting on the CH-CH group of donors	MF	58	1	0.0841912
GO:0004869	cysteine-type endopeptidase inhibitor activity	MF	58	1	0.0841912
GO:0007568	aging	BP	321	2	0.0845488
GO:0071375	cellular response to peptide hormone stimulus	BP	321	2	0.0845488
GO:0009914	hormone transport	BP	322	2	0.0849991
GO:0005739	mitochondrion	CC	1573	5	0.0851028
GO:0009893	positive regulation of metabolic process	BP	3642	9	0.0852969
GO:0032103	positive regulation of response to external stimulus	BP	323	2	0.0854503
GO:0030155	regulation of cell adhesion	BP	691	3	0.0855305
GO:0045824	negative regulation of innate immune response	BP	59	1	0.0855808
GO:0032890	regulation of organic acid transport	BP	59	1	0.0855808
GO:2000351	regulation of endothelial cell apoptotic process	BP	59	1	0.0855808
GO:0031102	neuron projection regeneration	BP	59	1	0.0855808
GO:0001836	release of cytochrome c from mitochondria	BP	59	1	0.0855808
GO:0042130	negative regulation of T cell proliferation	BP	59	1	0.0855808
GO:0045071	negative regulation of viral genome replication	BP	59	1	0.0855808
GO:0050776	regulation of immune response	BP	1115	4	0.0855917
GO:0033554	cellular response to stress	BP	2069	6	0.0864257
GO:0120193	tight junction organization	BP	60	1	0.0869684
GO:0031966	mitochondrial membrane	CC	698	3	0.0875463
GO:0016485	protein processing	BP	328	2	0.0877172
GO:0019058	viral life cycle	BP	328	2	0.0877172
GO:0098589	membrane region	CC	328	2	0.0877172
GO:0050701	interleukin-1 secretion	BP	61	1	0.0883539
GO:0071384	cellular response to corticosteroid stimulus	BP	61	1	0.0883539
GO:0032870	cellular response to hormone stimulus	BP	701	3	0.0884165
GO:0008202	steroid metabolic process	BP	331	2	0.0890862
GO:0019538	protein metabolic process	BP	5986	13	0.0896045
GO:0045453	bone resorption	BP	62	1	0.0897374
GO:0030145	manganese ion binding	MF	62	1	0.0897374
GO:0071363	cellular response to growth factor stimulus	BP	706	3	0.0898753
GO:0090181	regulation of cholesterol metabolic process	BP	63	1	0.0911189
GO:0042982	amyloid precursor protein metabolic process	BP	63	1	0.0911189
GO:0034394	protein localization to cell surface	BP	63	1	0.0911189
GO:2000401	regulation of lymphocyte migration	BP	63	1	0.0911189
GO:0005215	transporter activity	MF	1140	4	0.0911428
GO:0010562	positive regulation of phosphorus metabolic process	BP	1141	4	0.0913684
GO:0045937	positive regulation of phosphate metabolic process	BP	1141	4	0.0913684
GO:2000378	negative regulation of reactive oxygen species metabolic process	BP	64	1	0.0924984
GO:0043297	apical junction assembly	BP	64	1	0.0924984
GO:0045669	positive regulation of osteoblast differentiation	BP	64	1	0.0924984
GO:0048247	lymphocyte chemotaxis	BP	64	1	0.0924984
GO:0050922	negative regulation of chemotaxis	BP	64	1	0.0924984
GO:0045670	regulation of osteoclast differentiation	BP	64	1	0.0924984
GO:0072577	endothelial cell apoptotic process	BP	65	1	0.0938758
GO:0051187	cofactor catabolic process	BP	65	1	0.0938758
GO:0072678	T cell migration	BP	65	1	0.0938758
GO:0006026	aminoglycan catabolic process	BP	65	1	0.0938758
GO:0002548	monocyte chemotaxis	BP	65	1	0.0938758
GO:0005102	signaling receptor binding	MF	1624	5	0.0945816
GO:0010721	negative regulation of cell development	BP	344	2	0.0950928
GO:0045428	regulation of nitric oxide biosynthetic process	BP	66	1	0.0952512
GO:0010494	cytoplasmic stress granule	CC	66	1	0.0952512
GO:0042379	chemokine receptor binding	MF	66	1	0.0952512
GO:0015807	L-amino acid transport	BP	67	1	0.0966246
GO:0055080	cation homeostasis	BP	730	3	0.0970207
GO:0031343	positive regulation of cell killing	BP	68	1	0.097996
GO:2000243	positive regulation of reproductive process	BP	69	1	0.0993653
GO:0042698	ovulation cycle	BP	69	1	0.0993653
GO:0050771	negative regulation of axonogenesis	BP	69	1	0.0993653
GO:0005740	mitochondrial envelope	CC	739	3	0.0997602
GO:0098771	inorganic ion homeostasis	BP	741	3	0.100373
GO:0071840	cellular component organization or biogenesis	BP	6697	14	0.100412
GO:0050766	positive regulation of phagocytosis	BP	70	1	0.100733
GO:2001259	positive regulation of cation channel activity	BP	70	1	0.100733
GO:0051966	regulation of synaptic transmission, glutamatergic	BP	70	1	0.100733
GO:0002709	regulation of T cell mediated immunity	BP	70	1	0.100733
GO:0061515	myeloid cell development	BP	70	1	0.100733
GO:0034121	regulation of toll-like receptor signaling pathway	BP	70	1	0.100733
GO:0031967	organelle envelope	CC	1182	4	0.10086
GO:0031975	envelope	CC	1182	4	0.10086
GO:0032268	regulation of cellular protein metabolic process	BP	2679	7	0.101232
GO:1901361	organic cyclic compound catabolic process	BP	745	3	0.101604
GO:0050795	regulation of behavior	BP	71	1	0.102098
GO:0140096	catalytic activity, acting on a protein	MF	2165	6	0.102376
GO:0016491	oxidoreductase activity	MF	748	3	0.102532
GO:0043687	post-translational protein modification	BP	361	2	0.103122
GO:1903556	negative regulation of tumor necrosis factor superfamily cytokine production	BP	72	1	0.103461
GO:0002532	production of molecular mediator involved in inflammatory response	BP	72	1	0.103461
GO:0038034	signal transduction in absence of ligand	BP	72	1	0.103461
GO:0097192	extrinsic apoptotic signaling pathway in absence of ligand	BP	72	1	0.103461
GO:0010038	response to metal ion	BP	364	2	0.104558
GO:0045596	negative regulation of cell differentiation	BP	755	3	0.104709
GO:0006801	superoxide metabolic process	BP	73	1	0.104823
GO:0031100	animal organ regeneration	BP	73	1	0.104823
GO:0060350	endochondral bone morphogenesis	BP	73	1	0.104823
GO:0045685	regulation of glial cell differentiation	BP	73	1	0.104823
GO:0061844	antimicrobial humoral immune response mediated by antimicrobial peptide	BP	73	1	0.104823
GO:0032945	negative regulation of mononuclear cell proliferation	BP	73	1	0.104823
GO:0050672	negative regulation of lymphocyte proliferation	BP	73	1	0.104823
GO:0070821	tertiary granule membrane	CC	73	1	0.104823
GO:0048468	cell development	BP	2183	6	0.105537
GO:0001895	retina homeostasis	BP	74	1	0.106182
GO:1901616	organic hydroxy compound catabolic process	BP	74	1	0.106182
GO:0014015	positive regulation of gliogenesis	BP	74	1	0.106182
GO:0050710	negative regulation of cytokine secretion	BP	74	1	0.106182
GO:0008285	negative regulation of cell proliferation	BP	760	3	0.106276
GO:0006909	phagocytosis	BP	369	2	0.106965
GO:0035690	cellular response to drug	BP	369	2	0.106965
GO:0006695	cholesterol biosynthetic process	BP	75	1	0.107539
GO:0032482	Rab protein signal transduction	BP	75	1	0.107539
GO:0016835	carbon-oxygen lyase activity	MF	75	1	0.107539
GO:1902653	secondary alcohol biosynthetic process	BP	76	1	0.108895
GO:0030500	regulation of bone mineralization	BP	76	1	0.108895
GO:0001937	negative regulation of endothelial cell proliferation	BP	76	1	0.108895
GO:0030670	phagocytic vesicle membrane	CC	76	1	0.108895
GO:0051098	regulation of binding	BP	373	2	0.108901
GO:0006809	nitric oxide biosynthetic process	BP	77	1	0.110248
GO:1901224	positive regulation of NIK/NF-kappaB signaling	BP	77	1	0.110248
GO:0044215	other organism	CC	77	1	0.110248
GO:0044216	other organism cell	CC	77	1	0.110248
GO:0044217	other organism part	CC	77	1	0.110248
GO:0032413	negative regulation of ion transmembrane transporter activity	BP	78	1	0.111599
GO:0001910	regulation of leukocyte mediated cytotoxicity	BP	78	1	0.111599
GO:0070664	negative regulation of leukocyte proliferation	BP	78	1	0.111599
GO:0045765	regulation of angiogenesis	BP	383	2	0.113783
GO:0043462	regulation of ATPase activity	BP	80	1	0.114296
GO:0070509	calcium ion import	BP	80	1	0.114296
GO:0030295	protein kinase activator activity	MF	80	1	0.114296
GO:0031401	positive regulation of protein modification process	BP	1237	4	0.114304
GO:1901653	cellular response to peptide	BP	385	2	0.114767
GO:0043167	ion binding	MF	6218	13	0.115065
GO:0016126	sterol biosynthetic process	BP	81	1	0.115641
GO:1902930	regulation of alcohol biosynthetic process	BP	81	1	0.115641
GO:0021766	hippocampus development	BP	81	1	0.115641
GO:0005811	lipid droplet	CC	81	1	0.115641
GO:0055038	recycling endosome membrane	CC	81	1	0.115641
GO:0043168	anion binding	MF	2773	7	0.116455
GO:0046209	nitric oxide metabolic process	BP	82	1	0.116985
GO:0010941	regulation of cell death	BP	1736	5	0.117277
GO:0051130	positive regulation of cellular component organization	BP	1258	4	0.119645
GO:0043154	negative regulation of cysteine-type endopeptidase activity involved in apoptotic process	BP	84	1	0.119666
GO:0002718	regulation of cytokine production involved in immune response	BP	84	1	0.119666
GO:0008219	cell death	BP	2264	6	0.120414
GO:2001057	reactive nitrogen species metabolic process	BP	85	1	0.121003
GO:1904705	regulation of vascular smooth muscle cell proliferation	BP	85	1	0.121003
GO:1990874	vascular smooth muscle cell proliferation	BP	85	1	0.121003
GO:1903901	negative regulation of viral life cycle	BP	85	1	0.121003
GO:0098803	respiratory chain complex	CC	85	1	0.121003
GO:0001503	ossification	BP	398	2	0.121214
GO:0042446	hormone biosynthetic process	BP	86	1	0.122339
GO:0048013	ephrin receptor signaling pathway	BP	86	1	0.122339
GO:0042058	regulation of epidermal growth factor receptor signaling pathway	BP	86	1	0.122339
GO:0032760	positive regulation of tumor necrosis factor production	BP	86	1	0.122339
GO:0016209	antioxidant activity	MF	86	1	0.122339
GO:0019209	kinase activator activity	MF	86	1	0.122339
GO:0050801	ion homeostasis	BP	811	3	0.12279
GO:0055082	cellular chemical homeostasis	BP	812	3	0.123123
GO:0001892	embryonic placenta development	BP	87	1	0.123672
GO:0022407	regulation of cell-cell adhesion	BP	403	2	0.123718
GO:0045785	positive regulation of cell adhesion	BP	403	2	0.123718
GO:0031252	cell leading edge	CC	403	2	0.123718
GO:0008270	zinc ion binding	MF	816	3	0.124459
GO:0043900	regulation of multi-organism process	BP	405	2	0.124723
GO:0044093	positive regulation of molecular function	BP	1771	5	0.124882
GO:0009791	post-embryonic development	BP	88	1	0.125004
GO:1904035	regulation of epithelial cell apoptotic process	BP	88	1	0.125004
GO:0034103	regulation of tissue remodeling	BP	88	1	0.125004
GO:1903557	positive regulation of tumor necrosis factor superfamily cytokine production	BP	88	1	0.125004
GO:2000177	regulation of neural precursor cell proliferation	BP	88	1	0.125004
GO:0045921	positive regulation of exocytosis	BP	88	1	0.125004
GO:0005746	mitochondrial respiratory chain	CC	88	1	0.125004
GO:2001233	regulation of apoptotic signaling pathway	BP	406	2	0.125226
GO:0032410	negative regulation of transporter activity	BP	89	1	0.126334
GO:0019216	regulation of lipid metabolic process	BP	410	2	0.127245
GO:1903035	negative regulation of response to wounding	BP	90	1	0.127661
GO:0001843	neural tube closure	BP	90	1	0.127661
GO:0046849	bone remodeling	BP	90	1	0.127661
GO:0045778	positive regulation of ossification	BP	90	1	0.127661
GO:0071674	mononuclear cell migration	BP	90	1	0.127661
GO:0044425	membrane part	CC	6939	14	0.128118
GO:0060606	tube closure	BP	91	1	0.128987
GO:1904063	negative regulation of cation transmembrane transport	BP	91	1	0.128987
GO:0045638	negative regulation of myeloid cell differentiation	BP	91	1	0.128987
GO:0060333	interferon-gamma-mediated signaling pathway	BP	91	1	0.128987
GO:0035579	specific granule membrane	CC	91	1	0.128987
GO:1901565	organonitrogen compound catabolic process	BP	1296	4	0.129592
GO:0016032	viral process	BP	833	3	0.130198
GO:0030099	myeloid cell differentiation	BP	416	2	0.130288
GO:0031974	membrane-enclosed lumen	CC	5740	12	0.131062
GO:0043233	organelle lumen	CC	5740	12	0.131062
GO:0070013	intracellular organelle lumen	CC	5740	12	0.131062
GO:0032092	positive regulation of protein binding	BP	93	1	0.131633
GO:0003073	regulation of systemic arterial blood pressure	BP	93	1	0.131633
GO:0035249	synaptic transmission, glutamatergic	BP	93	1	0.131633
GO:1901184	regulation of ERBB signaling pathway	BP	93	1	0.131633
GO:0048609	multicellular organismal reproductive process	BP	838	3	0.131904
GO:0070167	regulation of biomineral tissue development	BP	94	1	0.132953
GO:0004553	hydrolase activity, hydrolyzing O-glycosyl compounds	MF	94	1	0.132953
GO:1901342	regulation of vasculature development	BP	422	2	0.133349
GO:0009968	negative regulation of signal transduction	BP	1313	4	0.134156
GO:0044070	regulation of anion transport	BP	95	1	0.134271
GO:0051952	regulation of amine transport	BP	95	1	0.134271
GO:0050810	regulation of steroid biosynthetic process	BP	95	1	0.134271
GO:0045069	regulation of viral genome replication	BP	95	1	0.134271
GO:0042116	macrophage activation	BP	95	1	0.134271
GO:0097327	response to antineoplastic agent	BP	96	1	0.135587
GO:0008585	female gonad development	BP	96	1	0.135587
GO:0032755	positive regulation of interleukin-6 production	BP	96	1	0.135587
GO:0014020	primary neural tube formation	BP	97	1	0.136901
GO:0010771	negative regulation of cell morphogenesis involved in differentiation	BP	97	1	0.136901
GO:0030316	osteoclast differentiation	BP	97	1	0.136901
GO:0032504	multicellular organism reproduction	BP	853	3	0.137072
GO:0050764	regulation of phagocytosis	BP	98	1	0.138213
GO:0031341	regulation of cell killing	BP	98	1	0.138213
GO:2001243	negative regulation of intrinsic apoptotic signaling pathway	BP	98	1	0.138213
GO:0051090	regulation of DNA-binding transcription factor activity	BP	432	2	0.138488
GO:0048525	negative regulation of viral process	BP	99	1	0.139523
GO:0050804	modulation of chemical synaptic transmission	BP	436	2	0.140557
GO:0034446	substrate adhesion-dependent cell spreading	BP	100	1	0.140831
GO:0070498	interleukin-1-mediated signaling pathway	BP	100	1	0.140831
GO:0070469	respiratory chain	CC	100	1	0.140831
GO:0060249	anatomical structure homeostasis	BP	437	2	0.141075
GO:0099177	regulation of trans-synaptic signaling	BP	437	2	0.141075
GO:0050830	defense response to Gram-positive bacterium	BP	101	1	0.142138
GO:1903426	regulation of reactive oxygen species biosynthetic process	BP	101	1	0.142138
GO:0046545	development of primary female sexual characteristics	BP	101	1	0.142138
GO:0007631	feeding behavior	BP	101	1	0.142138
GO:0048661	positive regulation of smooth muscle cell proliferation	BP	101	1	0.142138
GO:0015837	amine transport	BP	102	1	0.143442
GO:0098869	cellular oxidant detoxification	BP	102	1	0.143442
GO:0002367	cytokine production involved in immune response	BP	102	1	0.143442
GO:0032652	regulation of interleukin-1 production	BP	103	1	0.144745
GO:0034766	negative regulation of ion transmembrane transport	BP	103	1	0.144745
GO:1902106	negative regulation of leukocyte differentiation	BP	103	1	0.144745
GO:0044282	small molecule catabolic process	BP	445	2	0.145236
GO:0051246	regulation of protein metabolic process	BP	2936	7	0.145689
GO:0019233	sensory perception of pain	BP	104	1	0.146045
GO:0032414	positive regulation of ion transmembrane transporter activity	BP	104	1	0.146045
GO:0043227	membrane-bounded organelle	CC	13019	23	0.147264
GO:0001841	neural tube formation	BP	105	1	0.147344
GO:0007009	plasma membrane organization	BP	105	1	0.147344
GO:0044432	endoplasmic reticulum part	CC	1361	4	0.147408
GO:0002456	T cell mediated immunity	BP	106	1	0.148641
GO:0045088	regulation of innate immune response	BP	452	2	0.148899
GO:0045595	regulation of cell differentiation	BP	1878	5	0.149568
GO:0051341	regulation of oxidoreductase activity	BP	107	1	0.149936
GO:0044267	cellular protein metabolic process	BP	5276	11	0.150501
GO:0015696	ammonium transport	BP	108	1	0.151229
GO:0002697	regulation of immune effector process	BP	458	2	0.152054
GO:0021761	limbic system development	BP	109	1	0.15252
GO:0044853	plasma membrane raft	CC	109	1	0.15252
GO:0009986	cell surface	CC	897	3	0.152639
GO:0061387	regulation of extent of cell growth	BP	110	1	0.153809
GO:0023061	signal release	BP	462	2	0.154166
GO:0050778	positive regulation of immune response	BP	902	3	0.154444
GO:1904019	epithelial cell apoptotic process	BP	111	1	0.155096
GO:0072676	lymphocyte migration	BP	111	1	0.155096
GO:0042110	T cell activation	BP	464	2	0.155224
GO:0032411	positive regulation of transporter activity	BP	112	1	0.156381
GO:1990748	cellular detoxification	BP	112	1	0.156381
GO:0050868	negative regulation of T cell activation	BP	112	1	0.156381
GO:0048640	negative regulation of developmental growth	BP	113	1	0.157665
GO:0043200	response to amino acid	BP	113	1	0.157665
GO:0043066	negative regulation of apoptotic process	BP	911	3	0.157712
GO:0030282	bone mineralization	BP	114	1	0.158947
GO:0002688	regulation of leukocyte chemotaxis	BP	114	1	0.158947
GO:0005976	polysaccharide metabolic process	BP	114	1	0.158947
GO:0009055	electron transfer activity	MF	114	1	0.158947
GO:0050708	regulation of protein secretion	BP	472	2	0.159471
GO:0032612	interleukin-1 production	BP	115	1	0.160226
GO:0046660	female sex differentiation	BP	115	1	0.160226
GO:0042626	ATPase activity, coupled to transmembrane movement of substances	MF	115	1	0.160226
GO:0043492	ATPase activity, coupled to movement of substances	MF	115	1	0.160226
GO:1901222	regulation of NIK/NF-kappaB signaling	BP	117	1	0.16278
GO:0002761	regulation of myeloid leukocyte differentiation	BP	117	1	0.16278
GO:0010822	positive regulation of mitochondrion organization	BP	117	1	0.16278
GO:0016798	hydrolase activity, acting on glycosyl bonds	MF	117	1	0.16278
GO:0010648	negative regulation of cell communication	BP	1419	4	0.164105
GO:0015711	organic anion transport	BP	482	2	0.164811
GO:0023057	negative regulation of signaling	BP	1423	4	0.165283
GO:0007173	epidermal growth factor receptor signaling pathway	BP	119	1	0.165326
GO:0051193	regulation of cofactor metabolic process	BP	119	1	0.165326
GO:0043069	negative regulation of programmed cell death	BP	932	3	0.165423
GO:0046872	metal ion binding	MF	4189	9	0.166309
GO:0051249	regulation of lymphocyte activation	BP	485	2	0.16642
GO:0002698	negative regulation of immune effector process	BP	120	1	0.166597
GO:0022612	gland morphogenesis	BP	120	1	0.166597
GO:0010811	positive regulation of cell-substrate adhesion	BP	121	1	0.167865
GO:0030968	endoplasmic reticulum unfolded protein response	BP	121	1	0.167865
GO:1903409	reactive oxygen species biosynthetic process	BP	122	1	0.169132
GO:0005179	hormone activity	MF	122	1	0.169132
GO:0051928	positive regulation of calcium ion transport	BP	123	1	0.170396
GO:0002062	chondrocyte differentiation	BP	123	1	0.170396
GO:0005923	bicellular tight junction	CC	123	1	0.170396
GO:0015405	P-P-bond-hydrolysis-driven transmembrane transporter activity	MF	123	1	0.170396
GO:0016810	hydrolase activity, acting on carbon-nitrogen (but not peptide) bonds	MF	123	1	0.170396
GO:0051128	regulation of cellular component organization	BP	2507	6	0.171147
GO:0001838	embryonic epithelial tube formation	BP	124	1	0.171659
GO:0019218	regulation of steroid metabolic process	BP	124	1	0.171659
GO:0007043	cell-cell junction assembly	BP	124	1	0.171659
GO:0014013	regulation of gliogenesis	BP	124	1	0.171659
GO:0008637	apoptotic mitochondrial changes	BP	124	1	0.171659
GO:1904813	ficolin-1-rich granule lumen	CC	124	1	0.171659
GO:0030334	regulation of cell migration	BP	950	3	0.172126
GO:0043025	neuronal cell body	CC	497	2	0.172884
GO:2000134	negative regulation of G1/S transition of mitotic cell cycle	BP	125	1	0.17292
GO:0015399	primary active transmembrane transporter activity	MF	125	1	0.17292
GO:0045667	regulation of osteoblast differentiation	BP	126	1	0.174179
GO:0005793	endoplasmic reticulum-Golgi intermediate compartment	CC	126	1	0.174179
GO:0002791	regulation of peptide secretion	BP	500	2	0.174507
GO:0006468	protein phosphorylation	BP	1983	5	0.175755
GO:0010595	positive regulation of endothelial cell migration	BP	128	1	0.176692
GO:0034763	negative regulation of transmembrane transport	BP	128	1	0.176692
GO:0070160	tight junction	CC	128	1	0.176692
GO:0006915	apoptotic process	BP	1988	5	0.177047
GO:0001932	regulation of protein phosphorylation	BP	1465	4	0.177843
GO:0034754	cellular hormone metabolic process	BP	129	1	0.177945
GO:1903038	negative regulation of leukocyte cell-cell adhesion	BP	129	1	0.177945
GO:0019222	regulation of metabolic process	BP	7303	14	0.178213
GO:0017124	SH3 domain binding	MF	130	1	0.179197
GO:0098754	detoxification	BP	131	1	0.180447
GO:1902807	negative regulation of cell cycle G1/S phase transition	BP	131	1	0.180447
GO:0051082	unfolded protein binding	MF	131	1	0.180447
GO:0072175	epithelial tube formation	BP	132	1	0.181695
GO:0033036	macromolecule localization	BP	3116	7	0.181925
GO:0043169	cation binding	MF	4279	9	0.182591
GO:0002521	leukocyte differentiation	BP	515	2	0.182661
GO:0015078	proton transmembrane transporter activity	MF	133	1	0.182941
GO:0001889	liver development	BP	135	1	0.185428
GO:0098800	inner mitochondrial membrane protein complex	CC	135	1	0.185428
GO:0031224	intrinsic component of membrane	CC	5495	11	0.185679
GO:0051051	negative regulation of transport	BP	522	2	0.186487
GO:0052689	carboxylic ester hydrolase activity	MF	136	1	0.186669
GO:0045597	positive regulation of cell differentiation	BP	991	3	0.187693
GO:0019838	growth factor binding	MF	137	1	0.187908
GO:0061008	hepaticobiliary system development	BP	138	1	0.189145
GO:0008584	male gonad development	BP	138	1	0.189145
GO:0019842	vitamin binding	MF	138	1	0.189145
GO:0007586	digestion	BP	139	1	0.19038
GO:0050715	positive regulation of cytokine secretion	BP	139	1	0.19038
GO:0046546	development of primary male sexual characteristics	BP	139	1	0.19038
GO:0002700	regulation of production of molecular mediator of immune response	BP	139	1	0.19038
GO:0055114	oxidation-reduction process	BP	999	3	0.190776
GO:0034620	cellular response to unfolded protein	BP	140	1	0.191613
GO:0046330	positive regulation of JNK cascade	BP	140	1	0.191613
GO:0060627	regulation of vesicle-mediated transport	BP	532	2	0.191975
GO:0050709	negative regulation of protein secretion	BP	141	1	0.192845
GO:0044237	cellular metabolic process	BP	11301	20	0.193419
GO:0038127	ERBB signaling pathway	BP	142	1	0.194075
GO:0030879	mammary gland development	BP	143	1	0.195303
GO:0044344	cellular response to fibroblast growth factor stimulus	BP	143	1	0.195303
GO:0043296	apical junction complex	CC	143	1	0.195303
GO:2000145	regulation of cell motility	BP	1012	3	0.195815
GO:1904064	positive regulation of cation transmembrane transport	BP	144	1	0.196529
GO:0044703	multi-organism reproductive process	BP	1016	3	0.197373
GO:0006865	amino acid transport	BP	145	1	0.197753
GO:0002822	regulation of adaptive immune response based on somatic recombination of immune receptors built from immunoglobulin superfamily domains	BP	145	1	0.197753
GO:0009790	embryo development	BP	1017	3	0.197763
GO:0030335	positive regulation of cell migration	BP	544	2	0.198591
GO:2000241	regulation of reproductive process	BP	146	1	0.198975
GO:0035264	multicellular organism growth	BP	146	1	0.198975
GO:0051250	negative regulation of lymphocyte activation	BP	146	1	0.198975
GO:0002224	toll-like receptor signaling pathway	BP	146	1	0.198975
GO:0008528	G protein-coupled peptide receptor activity	MF	146	1	0.198975
GO:0043410	positive regulation of MAPK cascade	BP	546	2	0.199697
GO:0060548	negative regulation of cell death	BP	1023	3	0.200107
GO:0043524	negative regulation of neuron apoptotic process	BP	147	1	0.200196
GO:0061351	neural precursor cell proliferation	BP	147	1	0.200196
GO:0072562	blood microparticle	CC	147	1	0.200196
GO:0035148	tube formation	BP	148	1	0.201415
GO:0002792	negative regulation of peptide secretion	BP	148	1	0.201415
GO:0051092	positive regulation of NF-kappaB transcription factor activity	BP	149	1	0.202632
GO:1903900	regulation of viral life cycle	BP	149	1	0.202632
GO:0002706	regulation of lymphocyte mediated immunity	BP	149	1	0.202632
GO:0010720	positive regulation of cell development	BP	553	2	0.203573
GO:0050777	negative regulation of immune response	BP	150	1	0.203848
GO:0008203	cholesterol metabolic process	BP	150	1	0.203848
GO:0016331	morphogenesis of embryonic epithelium	BP	150	1	0.203848
GO:0008360	regulation of cell shape	BP	150	1	0.203848
GO:0071774	response to fibroblast growth factor	BP	150	1	0.203848
GO:0030176	integral component of endoplasmic reticulum membrane	CC	150	1	0.203848
GO:0000902	cell morphogenesis	BP	1034	3	0.204423
GO:0031324	negative regulation of cellular metabolic process	BP	2650	6	0.204871
GO:0016999	antibiotic metabolic process	BP	151	1	0.205061
GO:0044429	mitochondrial part	CC	1036	3	0.205211
GO:0032675	regulation of interleukin-6 production	BP	152	1	0.206273
GO:0001653	peptide receptor activity	MF	152	1	0.206273
GO:0045807	positive regulation of endocytosis	BP	153	1	0.207483
GO:0050729	positive regulation of inflammatory response	BP	153	1	0.207483
GO:0010770	positive regulation of cell morphogenesis involved in differentiation	BP	154	1	0.208691
GO:0022857	transmembrane transporter activity	MF	1045	3	0.208763
GO:0051093	negative regulation of developmental process	BP	1046	3	0.209159
GO:0042060	wound healing	BP	564	2	0.209684
GO:0044297	cell body	CC	564	2	0.209684
GO:1902652	secondary alcohol metabolic process	BP	155	1	0.209897
GO:2001236	regulation of extrinsic apoptotic signaling pathway	BP	155	1	0.209897
GO:0010977	negative regulation of neuron projection development	BP	155	1	0.209897
GO:1903707	negative regulation of hemopoiesis	BP	155	1	0.209897
GO:0034767	positive regulation of ion transmembrane transport	BP	156	1	0.211102
GO:0030856	regulation of epithelial cell differentiation	BP	156	1	0.211102
GO:0042129	regulation of T cell proliferation	BP	156	1	0.211102
GO:0007259	JAK-STAT cascade	BP	156	1	0.211102
GO:0044281	small molecule metabolic process	BP	2115	5	0.211121
GO:0071704	organic substance metabolic process	BP	12093	21	0.211831
GO:2000147	positive regulation of cell motility	BP	568	2	0.211912
GO:0043271	negative regulation of ion transport	BP	157	1	0.212305
GO:0031227	intrinsic component of endoplasmic reticulum membrane	CC	158	1	0.213506
GO:0012501	programmed cell death	BP	2132	5	0.215853
GO:0021915	neural tube development	BP	160	1	0.215903
GO:1903305	regulation of regulated secretory pathway	BP	160	1	0.215903
GO:0046661	male sex differentiation	BP	160	1	0.215903
GO:0002819	regulation of adaptive immune response	BP	160	1	0.215903
GO:0042981	regulation of apoptotic process	BP	1587	4	0.216146
GO:0035967	cellular response to topologically incorrect protein	BP	161	1	0.217098
GO:0032635	interleukin-6 production	BP	161	1	0.217098
GO:1902600	proton transmembrane transport	BP	163	1	0.219485
GO:0051272	positive regulation of cellular component movement	BP	585	2	0.221408
GO:0071417	cellular response to organonitrogen compound	BP	585	2	0.221408
GO:0050680	negative regulation of epithelial cell proliferation	BP	165	1	0.221864
GO:0071695	anatomical structure maturation	BP	165	1	0.221864
GO:2001242	regulation of intrinsic apoptotic signaling pathway	BP	165	1	0.221864
GO:0016125	sterol metabolic process	BP	166	1	0.223051
GO:0097696	STAT cascade	BP	166	1	0.223051
GO:1902533	positive regulation of intracellular signal transduction	BP	1082	3	0.223523
GO:0019752	carboxylic acid metabolic process	BP	1083	3	0.223925
GO:0032270	positive regulation of cellular protein metabolic process	BP	1611	4	0.223963
GO:0030666	endocytic vesicle membrane	CC	167	1	0.224236
GO:0040012	regulation of locomotion	BP	1084	3	0.224327
GO:0043067	regulation of programmed cell death	BP	1613	4	0.224618
GO:0009306	protein secretion	BP	591	2	0.22477
GO:0042325	regulation of phosphorylation	BP	1614	4	0.224946
GO:0007156	homophilic cell adhesion via plasma membrane adhesion molecules	BP	168	1	0.225419
GO:0050728	negative regulation of inflammatory response	BP	169	1	0.226601
GO:0048660	regulation of smooth muscle cell proliferation	BP	169	1	0.226601
GO:0071772	response to BMP	BP	170	1	0.227781
GO:0071773	cellular response to BMP stimulus	BP	170	1	0.227781
GO:0006022	aminoglycan metabolic process	BP	170	1	0.227781
GO:0022008	neurogenesis	BP	1623	4	0.227902
GO:1901575	organic substance catabolic process	BP	2175	5	0.227986
GO:0040017	positive regulation of locomotion	BP	598	2	0.228698
GO:0042995	cell projection	CC	2178	5	0.228841
GO:0043901	negative regulation of multi-organism process	BP	171	1	0.228959
GO:0048659	smooth muscle cell proliferation	BP	171	1	0.228959
GO:0051270	regulation of cellular component movement	BP	1097	3	0.229572
GO:0031325	positive regulation of cellular metabolic process	BP	3330	7	0.22982
GO:0032874	positive regulation of stress-activated MAPK cascade	BP	172	1	0.230136
GO:0021543	pallium development	BP	172	1	0.230136
GO:0070304	positive regulation of stress-activated protein kinase signaling cascade	BP	173	1	0.23131
GO:0002695	negative regulation of leukocyte activation	BP	175	1	0.233655
GO:0046165	alcohol biosynthetic process	BP	175	1	0.233655
GO:0055037	recycling endosome	CC	176	1	0.234824
GO:1903034	regulation of response to wounding	BP	179	1	0.238322
GO:0008361	regulation of cell size	BP	179	1	0.238322
GO:0010604	positive regulation of macromolecule metabolic process	BP	3366	7	0.238331
GO:0070613	regulation of protein processing	BP	180	1	0.239485
GO:0071466	cellular response to xenobiotic stimulus	BP	180	1	0.239485
GO:0019887	protein kinase regulator activity	MF	180	1	0.239485
GO:0097367	carbohydrate derivative binding	MF	2219	5	0.240629
GO:0022408	negative regulation of cell-cell adhesion	BP	181	1	0.240646
GO:1903317	regulation of protein maturation	BP	182	1	0.241805
GO:0008217	regulation of blood pressure	BP	182	1	0.241805
GO:0061138	morphogenesis of a branching epithelium	BP	182	1	0.241805
GO:0010821	regulation of mitochondrion organization	BP	182	1	0.241805
GO:0043123	positive regulation of I-kappaB kinase/NF-kappaB signaling	BP	183	1	0.242963
GO:0050770	regulation of axonogenesis	BP	183	1	0.242963
GO:0038061	NIK/NF-kappaB signaling	BP	183	1	0.242963
GO:0002790	peptide secretion	BP	624	2	0.243335
GO:0042098	T cell proliferation	BP	184	1	0.244118
GO:2000045	regulation of G1/S transition of mitotic cell cycle	BP	184	1	0.244118
GO:0046328	regulation of JNK cascade	BP	185	1	0.245272
GO:0101002	ficolin-1-rich granule	CC	185	1	0.245272
GO:0006820	anion transport	BP	629	2	0.246157
GO:0030308	negative regulation of cell growth	BP	186	1	0.246425
GO:0022900	electron transport chain	BP	186	1	0.246425
GO:0032989	cellular component morphogenesis	BP	1143	3	0.248329
GO:0043902	positive regulation of multi-organism process	BP	188	1	0.248724
GO:0031345	negative regulation of cell projection organization	BP	188	1	0.248724
GO:0044424	intracellular part	CC	15063	25	0.248912
GO:0005622	intracellular	CC	15073	25	0.250844
GO:0071248	cellular response to metal ion	BP	190	1	0.251017
GO:1901136	carbohydrate derivative catabolic process	BP	192	1	0.253303
GO:0051224	negative regulation of protein transport	BP	193	1	0.254444
GO:0008324	cation transmembrane transporter activity	MF	644	2	0.254634
GO:0048519	negative regulation of biological process	BP	5869	11	0.254682
GO:1901699	cellular response to nitrogen compound	BP	648	2	0.256896
GO:0001763	morphogenesis of a branching structure	BP	196	1	0.257855
GO:0002685	regulation of leukocyte migration	BP	196	1	0.257855
GO:0006694	steroid biosynthetic process	BP	196	1	0.257855
GO:0051247	positive regulation of protein metabolic process	BP	1713	4	0.258038
GO:1904950	negative regulation of establishment of protein localization	BP	197	1	0.258989
GO:0002221	pattern recognition receptor signaling pathway	BP	197	1	0.258989
GO:0046890	regulation of lipid biosynthetic process	BP	198	1	0.260121
GO:0043436	oxoacid metabolic process	BP	1172	3	0.260293
GO:0050866	negative regulation of cell activation	BP	199	1	0.261252
GO:0016052	carbohydrate catabolic process	BP	199	1	0.261252
GO:0050870	positive regulation of T cell activation	BP	202	1	0.264633
GO:1902806	regulation of cell cycle G1/S phase transition	BP	202	1	0.264633
GO:0030278	regulation of ossification	BP	203	1	0.265757
GO:0048878	chemical homeostasis	BP	1187	3	0.266518
GO:0034764	positive regulation of transmembrane transport	BP	204	1	0.266879
GO:0006082	organic acid metabolic process	BP	1192	3	0.268598
GO:0002064	epithelial cell development	BP	207	1	0.270235
GO:0019207	kinase regulator activity	MF	207	1	0.270235
GO:1901215	negative regulation of neuron death	BP	208	1	0.27135
GO:0050670	regulation of lymphocyte proliferation	BP	208	1	0.27135
GO:0050792	regulation of viral process	BP	208	1	0.27135
GO:0048589	developmental growth	BP	674	2	0.271616
GO:0044248	cellular catabolic process	BP	2324	5	0.271629
GO:0051216	cartilage development	BP	209	1	0.272464
GO:0032944	regulation of mononuclear cell proliferation	BP	209	1	0.272464
GO:0043523	regulation of neuron apoptotic process	BP	210	1	0.273576
GO:0009612	response to mechanical stimulus	BP	210	1	0.273576
GO:1903531	negative regulation of secretion by cell	BP	211	1	0.274687
GO:0036464	cytoplasmic ribonucleoprotein granule	CC	212	1	0.275796
GO:0031344	regulation of cell projection organization	BP	682	2	0.276148
GO:0007254	JNK cascade	BP	214	1	0.278009
GO:0010810	regulation of cell-substrate adhesion	BP	215	1	0.279113
GO:0070374	positive regulation of ERK1 and ERK2 cascade	BP	215	1	0.279113
GO:0043281	regulation of cysteine-type endopeptidase activity involved in apoptotic process	BP	215	1	0.279113
GO:0032869	cellular response to insulin stimulus	BP	216	1	0.280215
GO:0043393	regulation of protein binding	BP	217	1	0.281316
GO:0071241	cellular response to inorganic substance	BP	217	1	0.281316
GO:0017157	regulation of exocytosis	BP	217	1	0.281316
GO:0050920	regulation of chemotaxis	BP	217	1	0.281316
GO:0016323	basolateral plasma membrane	CC	217	1	0.281316
GO:0010001	glial cell differentiation	BP	218	1	0.282415
GO:0019722	calcium-mediated signaling	BP	218	1	0.282415
GO:1903039	positive regulation of leukocyte cell-cell adhesion	BP	218	1	0.282415
GO:0009892	negative regulation of metabolic process	BP	3549	7	0.283303
GO:0035556	intracellular signal transduction	BP	2952	6	0.283562
GO:0006464	cellular protein modification process	BP	4160	8	0.284523
GO:0036211	protein modification process	BP	4160	8	0.284523
GO:0002526	acute inflammatory response	BP	220	1	0.284608
GO:0007188	adenylate cyclase-modulating G protein-coupled receptor signaling pathway	BP	221	1	0.285702
GO:0051223	regulation of protein transport	BP	699	2	0.285778
GO:0071705	nitrogen compound transport	BP	2374	5	0.286744
GO:0070663	regulation of leukocyte proliferation	BP	222	1	0.286795
GO:0007399	nervous system development	BP	2375	5	0.287048
GO:0045444	fat cell differentiation	BP	223	1	0.287886
GO:0035770	ribonucleoprotein granule	CC	223	1	0.287886
GO:0007268	chemical synaptic transmission	BP	703	2	0.288043
GO:0098916	anterograde trans-synaptic signaling	BP	703	2	0.288043
GO:0016197	endosomal transport	BP	224	1	0.288975
GO:0005509	calcium ion binding	MF	705	2	0.289176
GO:0045665	negative regulation of neuron differentiation	BP	225	1	0.290063
GO:0099537	trans-synaptic signaling	BP	711	2	0.292572
GO:0048471	perinuclear region of cytoplasm	CC	711	2	0.292572
GO:0019439	aromatic compound catabolic process	BP	712	2	0.293138
GO:0051054	positive regulation of DNA metabolic process	BP	228	1	0.293316
GO:0019220	regulation of phosphate metabolic process	BP	1816	4	0.293574
GO:0051174	regulation of phosphorus metabolic process	BP	1818	4	0.294273
GO:0010594	regulation of endothelial cell migration	BP	229	1	0.294398
GO:0044455	mitochondrial membrane part	CC	229	1	0.294398
GO:2001234	negative regulation of apoptotic signaling pathway	BP	230	1	0.295477
GO:0099536	synaptic signaling	BP	717	2	0.295968
GO:0048588	developmental cell growth	BP	234	1	0.29978
GO:0016310	phosphorylation	BP	2417	5	0.299896
GO:0060560	developmental growth involved in morphogenesis	BP	235	1	0.300852
GO:0005802	trans-Golgi network	CC	236	1	0.301922
GO:0090087	regulation of peptide transport	BP	729	2	0.302754
GO:0043122	regulation of I-kappaB kinase/NF-kappaB signaling	BP	237	1	0.302991
GO:0031669	cellular response to nutrient levels	BP	237	1	0.302991
GO:0032872	regulation of stress-activated MAPK cascade	BP	237	1	0.302991
GO:0051048	negative regulation of secretion	BP	238	1	0.304057
GO:0005575	cellular_component	CC	19717	31	0.304224
GO:0046649	lymphocyte activation	BP	733	2	0.305015
GO:0051402	neuron apoptotic process	BP	239	1	0.305123
GO:0070302	regulation of stress-activated protein kinase signaling cascade	BP	239	1	0.305123
GO:0033002	muscle cell proliferation	BP	239	1	0.305123
GO:0008289	lipid binding	MF	734	2	0.30558
GO:0044238	primary metabolic process	BP	11287	19	0.305685
GO:0034329	cell junction assembly	BP	241	1	0.307249
GO:0060429	epithelium development	BP	1291	3	0.310171
GO:0000904	cell morphogenesis involved in differentiation	BP	744	2	0.311226
GO:0031399	regulation of protein modification process	BP	1867	4	0.311475
GO:0070201	regulation of establishment of protein localization	BP	746	2	0.312354
GO:0080135	regulation of cellular response to stress	BP	746	2	0.312354
GO:0048523	negative regulation of cellular process	BP	4903	9	0.314255
GO:1901991	negative regulation of mitotic cell cycle phase transition	BP	248	1	0.314641
GO:0071560	cellular response to transforming growth factor beta stimulus	BP	249	1	0.31569
GO:0045926	negative regulation of growth	BP	249	1	0.31569
GO:0071383	cellular response to steroid hormone stimulus	BP	250	1	0.316739
GO:0045637	regulation of myeloid cell differentiation	BP	251	1	0.317785
GO:0021537	telencephalon development	BP	251	1	0.317785
GO:0043005	neuron projection	CC	1312	3	0.319056
GO:0051924	regulation of calcium ion transport	BP	254	1	0.320916
GO:0051172	negative regulation of nitrogen compound metabolic process	BP	2488	5	0.321873
GO:0071559	response to transforming growth factor beta	BP	255	1	0.321956
GO:0022409	positive regulation of cell-cell adhesion	BP	255	1	0.321956
GO:0043408	regulation of MAPK cascade	BP	768	2	0.324746
GO:0036094	small molecule binding	MF	2503	5	0.326551
GO:0005783	endoplasmic reticulum	CC	1911	4	0.327036
GO:0072659	protein localization to plasma membrane	BP	260	1	0.327135
GO:0030855	epithelial cell differentiation	BP	775	2	0.32868
GO:0015850	organic hydroxy compound transport	BP	262	1	0.329196
GO:0098798	mitochondrial protein complex	CC	262	1	0.329196
GO:0080090	regulation of primary metabolic process	BP	6233	11	0.330731
GO:0031330	negative regulation of cellular catabolic process	BP	264	1	0.331251
GO:1901988	negative regulation of cell cycle phase transition	BP	267	1	0.334321
GO:0050714	positive regulation of protein secretion	BP	268	1	0.335342
GO:0031668	cellular response to extracellular stimulus	BP	268	1	0.335342
GO:0043412	macromolecule modification	BP	4373	8	0.336346
GO:0007249	I-kappaB kinase/NF-kappaB signaling	BP	269	1	0.336361
GO:0043491	protein kinase B signaling	BP	269	1	0.336361
GO:0046651	lymphocyte proliferation	BP	272	1	0.339409
GO:1902105	regulation of leukocyte differentiation	BP	272	1	0.339409
GO:0061448	connective tissue development	BP	273	1	0.340422
GO:0032943	mononuclear cell proliferation	BP	274	1	0.341433
GO:0006807	nitrogen compound metabolic process	BP	10812	18	0.342052
GO:0043270	positive regulation of ion transport	BP	275	1	0.342443
GO:0043226	organelle	CC	14144	23	0.342551
GO:1902531	regulation of intracellular signal transduction	BP	1961	4	0.344815
GO:0001822	kidney development	BP	278	1	0.345464
GO:0000082	G1/S transition of mitotic cell cycle	BP	279	1	0.346468
GO:0031323	regulation of cellular metabolic process	BP	6305	11	0.346566
GO:0016757	transferase activity, transferring glycosyl groups	MF	280	1	0.347471
GO:0001664	G protein-coupled receptor binding	MF	280	1	0.347471
GO:0021700	developmental maturation	BP	284	1	0.351466
GO:0042623	ATPase activity, coupled	MF	284	1	0.351466
GO:0034976	response to endoplasmic reticulum stress	BP	285	1	0.352461
GO:0051173	positive regulation of nitrogen compound metabolic process	BP	3200	6	0.35338
GO:0051403	stress-activated MAPK cascade	BP	286	1	0.353454
GO:0002440	production of molecular mediator of immune response	BP	286	1	0.353454
GO:0005126	cytokine receptor binding	MF	286	1	0.353454
GO:0050767	regulation of neurogenesis	BP	822	2	0.354948
GO:0002793	positive regulation of peptide secretion	BP	288	1	0.355437
GO:0007162	negative regulation of cell adhesion	BP	289	1	0.356426
GO:0097193	intrinsic apoptotic signaling pathway	BP	289	1	0.356426
GO:0006629	lipid metabolic process	BP	1407	3	0.359332
GO:0009410	response to xenobiotic stimulus	BP	292	1	0.359385
GO:0072001	renal system development	BP	293	1	0.360368
GO:0048511	rhythmic process	BP	295	1	0.362331
GO:0050768	negative regulation of neurogenesis	BP	295	1	0.362331
GO:0098802	plasma membrane receptor complex	CC	295	1	0.362331
GO:0031965	nuclear membrane	CC	296	1	0.36331
GO:0070661	leukocyte proliferation	BP	298	1	0.365263
GO:0044843	cell cycle G1/S phase transition	BP	298	1	0.365263
GO:0002758	innate immune response-activating signal transduction	BP	298	1	0.365263
GO:0036477	somatodendritic compartment	CC	843	2	0.366587
GO:0070372	regulation of ERK1 and ERK2 cascade	BP	300	1	0.367211
GO:0009895	negative regulation of catabolic process	BP	308	1	0.374944
GO:0042803	protein homodimerization activity	MF	859	2	0.375408
GO:1990778	protein localization to cell periphery	BP	311	1	0.37782
GO:0017111	nucleoside-triphosphatase activity	MF	865	2	0.378705
GO:1901214	regulation of neuron death	BP	313	1	0.379731
GO:0051961	negative regulation of nervous system development	BP	315	1	0.381636
GO:0031098	stress-activated protein kinase signaling cascade	BP	315	1	0.381636
GO:0006898	receptor-mediated endocytosis	BP	316	1	0.382586
GO:0070371	ERK1 and ERK2 cascade	BP	317	1	0.383535
GO:0007204	positive regulation of cytosolic calcium ion concentration	BP	319	1	0.385428
GO:0002218	activation of innate immune response	BP	319	1	0.385428
GO:0010605	negative regulation of macromolecule metabolic process	BP	3314	6	0.386314
GO:0015075	ion transmembrane transporter activity	MF	880	2	0.386918
GO:0060562	epithelial tube morphogenesis	BP	322	1	0.388258
GO:0003924	GTPase activity	MF	324	1	0.390137
GO:0030097	hemopoiesis	BP	887	2	0.390737
GO:0009615	response to virus	BP	326	1	0.392011
GO:0120025	plasma membrane bounded cell projection	CC	2103	4	0.395538
GO:0051235	maintenance of location	BP	330	1	0.395742
GO:0001655	urogenital system development	BP	330	1	0.395742
GO:0045296	cadherin binding	MF	331	1	0.396671
GO:0016042	lipid catabolic process	BP	333	1	0.398525
GO:0015849	organic acid transport	BP	333	1	0.398525
GO:0046942	carboxylic acid transport	BP	333	1	0.398525
GO:0030336	negative regulation of cell migration	BP	334	1	0.39945
GO:0051251	positive regulation of lymphocyte activation	BP	334	1	0.39945
GO:0071902	positive regulation of protein serine/threonine kinase activity	BP	334	1	0.39945
GO:0007596	blood coagulation	BP	336	1	0.401297
GO:0045930	negative regulation of mitotic cell cycle	BP	338	1	0.403137
GO:0071496	cellular response to external stimulus	BP	339	1	0.404055
GO:0016462	pyrophosphatase activity	MF	914	2	0.405376
GO:0007599	hemostasis	BP	341	1	0.405888
GO:0050817	coagulation	BP	342	1	0.406802
GO:0016817	hydrolase activity, acting on acid anhydrides	MF	917	2	0.406993
GO:0016818	hydrolase activity, acting on acid anhydrides, in phosphorus-containing anhydrides	MF	917	2	0.406993
GO:0001101	response to acid chemical	BP	343	1	0.407715
GO:0048699	generation of neurons	BP	1524	3	0.408658
GO:0048638	regulation of developmental growth	BP	347	1	0.411352
GO:0070997	neuron death	BP	348	1	0.412258
GO:0051960	regulation of nervous system development	BP	927	2	0.412371
GO:0030030	cell projection organization	BP	1534	3	0.41284
GO:2000146	negative regulation of cell motility	BP	349	1	0.413163
GO:0048534	hematopoietic or lymphoid organ development	BP	929	2	0.413444
GO:0002449	lymphocyte mediated immunity	BP	352	1	0.415869
GO:0016021	integral component of membrane	CC	5330	9	0.416882
GO:0031589	cell-substrate adhesion	BP	354	1	0.417666
GO:0005765	lysosomal membrane	CC	354	1	0.417666
GO:0098852	lytic vacuole membrane	CC	355	1	0.418563
GO:0051480	regulation of cytosolic calcium ion concentration	BP	357	1	0.420352
GO:0022412	cellular process involved in reproduction in multicellular organism	BP	357	1	0.420352
GO:0002460	adaptive immune response based on somatic recombination of immune receptors built from immunoglobulin superfamily domains	BP	361	1	0.423914
GO:0010948	negative regulation of cell cycle process	BP	361	1	0.423914
GO:0022804	active transmembrane transporter activity	MF	362	1	0.424802
GO:0006066	alcohol metabolic process	BP	364	1	0.426572
GO:0000165	MAPK cascade	BP	958	2	0.4289
GO:0032535	regulation of cellular component size	BP	370	1	0.431853
GO:0001701	in utero embryonic development	BP	373	1	0.434475
[truncated: 21,265 more rows]

## Sheet: RNASeq_PC2_HL-UM
Term_id	Term	Ont	N	DE	P.DE
[truncated: 22,911 more rows]

[truncated: 12 more sheets: RNASeq_PC1_CH-UM, RNASeq_PC2_CH-UM, Boldt_PC1_UM-Healthy, Boldt_PC2_UM-Healthy, Boldt_PC1_UM-CM, Boldt_PC2_UM-CM, Boldt_PC1_UM-SA, Boldt_PC2_UM-SA, Idaghdour_PC1_UM-Healthy, Idaghdour_PC2_UM-Healthy, CHMI_PC1, CHMI_PC2]
