# Supplementary material for: Comparative transcriptomic analysis reveals translationally relevant processes in mouse models of malaria
Source: eLife. 2022 Jan 10;11:e70763. doi: 10.7554/eLife.70763 (PMC8747512; doi:10.7554/eLife.70763)
Supplement: Supplementary file 12. [file elife-70763-supp12.xlsx]

## Sheet: Key
Supplementary File 12 Mouse Differential Expression Analysis
Table Column Name Key
Description: The results of the differential expression analysis (DEA) of each model for the following comparisons: Early-Control, Late-Control and Late-Early. LogFC values are given relative to the more severe phenotype i.e. late for late-early and early for early-control etc.
SYMBOL	MGI gene symbol
logFC	log fold-change: these are given relative to the more severe phenotype. So a positive logFc indocates that the expression of the gene is higher in the more severe group.
logCPM	log counts per million
LR	likelihood ratio
PValue	p-values
FDR	false discovery rate corrected p-values
Tab Name Key
PbNK65	Mouse model: Plasmodium berghei NK65
PbANKA	Mouse model: Plasmodium berghei ANKA
PcAS	Mouse model: Plasmodium chabaudi AS
Py17XL	Mouse model: Plasmoium yoelii 17XL
Py17XNL	Mouse model: Plasmodium yoelii 17XNL
Late	Mice culled at the models late time point
Control	Healthy uninfected mice
Early	Mice culled at the models early time point

## Sheet: PbANKA_Early-Control
SYMBOL	logFC	logCPM	LR	PValue	FDR
Mbl2	-49.8931	3.46007	136.82	1.32005e-31	1.24386e-27
Apoa5	-46.9915	3.49144	135.711	2.30771e-31	1.24386e-27
Cyp2c68	-55.9602	3.49333	121.078	3.67437e-28	1.32032e-24
Nat8f2	-44.8327	3.04482	108.558	2.02815e-25	5.46587e-22
Hnf4a	-37.8427	2.26596	70.5706	4.44076e-17	9.57428e-14
Cfi	-37.7661	2.2881	64.4257	1.00241e-15	1.80099e-12
Cyp2c29	-42.4545	2.80555	62.9628	2.10647e-15	3.24397e-12
Slco1b2	-36.2282	1.6279	50.8237	1.01044e-12	1.36157e-09
Otc	-39.7635	2.34779	49.4583	2.02633e-12	2.42709e-09
Cyp2a5	-29.3147	2.05658	40.6984	1.77633e-10	1.91489e-07
Ifit3b	7.41852	6.53	34.9838	3.32452e-09	3.25803e-06
Pzp	-32.818	5.04909	30.1069	4.08881e-08	3.67312e-05
Alb	-45.1338	10.2259	28.7387	8.283e-08	6.86852e-05
Serpina3f	6.59366	5.97168	24.1971	8.69628e-07	0.000669614
Oas1a	4.20962	7.18257	23.6115	1.17878e-06	0.00084715
Phf11b	3.79317	7.38656	20.6199	5.60096e-06	0.00377365
Ndrg2	-7.69643	4.63851	19.9077	8.12702e-06	0.0049556
Gpd1	-14.5817	2.43347	19.8733	8.27466e-06	0.0049556
Cep55	9.05323	3.27747	19.7028	9.04678e-06	0.00513286
Oas1g	5.69249	5.12028	19.4987	1.0067e-05	0.00542611
Phf11a	6.90127	5.33059	19.1378	1.21615e-05	0.0062429
Nek2	8.64283	3.39565	18.9851	1.31742e-05	0.00645534
Tgtp1	4.10485	7.31153	18.1954	1.99361e-05	0.00895462
Eif2ak2	3.45896	5.68043	18.252	1.93525e-05	0.00895462
Redrum	-10.6004	4.74543	17.711	2.57138e-05	0.0110878
Gbp10	9.30645	3.56698	17.4404	2.96451e-05	0.0122913
Cps1	-24.0267	3.24716	17.1262	3.49771e-05	0.0125684
Rgn	-26.2875	3.05396	17.1827	3.39506e-05	0.0125684
Ttr	-34.5222	6.55702	17.2306	3.31058e-05	0.0125684
Ifi204	3.27274	8.05804	17.3046	3.18414e-05	0.0125684
Gbp6	3.58813	5.47325	17.0398	3.66044e-05	0.0127289
Vangl1	-8.53014	4.86061	16.9078	3.92396e-05	0.0132188
Ly6c2	3.75736	9.31325	16.4731	4.93445e-05	0.0161192
Gbp5	6.46475	5.71316	16.2971	5.41481e-05	0.0171681
Orm1	-26.228	4.59324	15.8009	7.0369e-05	0.0216736
Ifit3	5.4461	8.41969	15.5965	7.83995e-05	0.0228418
Ddah1	-19.3064	1.09905	15.6205	7.74106e-05	0.0228418
Spon1	8.55035	2.58279	15.5307	8.11757e-05	0.0230283
Pgrmc2	-4.1304	3.72868	15.367	8.8519e-05	0.0244676
Hpx	-36.0419	6.55187	15.2039	9.65019e-05	0.0247688
Mill2	10.9917	1.59957	15.2943	9.19959e-05	0.0247688
Gm12185	7.17137	4.52388	15.2139	9.59947e-05	0.0247688
Slc6a13	-11.4627	2.53207	15.1454	9.95392e-05	0.0249543
mt.Nd2	-4.64622	6.52763	14.9578	0.000109942	0.0264628
Scoc	-5.3511	5.36017	14.9488	0.000110466	0.0264628
Cxcl9	9.04362	3.73284	14.85	0.000116411	0.0272806
Smtnl1	-10.5439	2.39277	14.7748	0.000121145	0.027786
Abat	-15.6524	1.79022	14.715	0.000125045	0.028083
AI847159	10.4099	1.17857	14.6311	0.000130739	0.0287626
Uxt	-3.50671	4.78344	14.5496	0.000136519	0.0294336
Capn10	6.11792	2.37918	14.4923	0.000140733	0.0297471
Igkv12.89	11.7589	0.779909	14.4493	0.000143982	0.0298487
I830127L07Rik	3.52315	6.58402	14.1385	0.000169828	0.0322405
Gm5431	5.13527	4.54752	14.132	0.000170422	0.0322405
F9	-18.3189	1.80528	14.1314	0.000170474	0.0322405
Mbip	-3.94143	3.48394	14.2115	0.000163372	0.0322405
Gm12250	3.39624	6.90785	14.2481	0.000160222	0.0322405
Aldob	-19.8911	5.99269	14.0443	0.000178556	0.0331869
Gstt1	-9.02622	5.00308	13.9951	0.000183288	0.0334888
Apoa2	-28.1123	6.69735	13.8794	0.000194928	0.0344973
Gcdh	-4.90986	4.52681	13.8767	0.000195207	0.0344973
Ces1c	-30.2899	5.44096	13.6938	0.000215168	0.0374115
1600014C10Rik	2.51806	6.72047	13.6087	0.00022514	0.0380628
Zbp1	3.87612	8.3301	13.583	0.000228243	0.0380628
Ifit2	3.70469	7.23719	13.5726	0.000229507	0.0380628
Car1	-9.45017	3.81247	13.3478	0.000258722	0.0410151
Sftpa1	-21.7236	3.2417	13.365	0.000256363	0.0410151
Slfn1	3.0124	7.15179	13.3662	0.000256202	0.0410151
Col18a1	-15.4857	1.89291	13.0645	0.000300941	0.0470165
Gbp2	4.67602	10.3345	12.9219	0.000324754	0.0486228
Pfkp	3.15543	7.04133	12.9529	0.000319424	0.0486228
Bnip3	-5.14423	3.81398	12.9286	0.000323599	0.0486228
mt.Nd4	-4.11122	8.83486	12.8325	0.000340652	0.0503045
Ifi47	2.83543	8.65465	12.7977	0.000347042	0.0505555
Mttp	-18.4683	1.41426	12.5755	0.000390833	0.0553416
Smim1	-8.30857	2.66007	12.5185	0.00040295	0.0553416
Aldh1a7	-12.7265	2.5112	12.5064	0.000405564	0.0553416
Fads1	-6.57709	3.84242	12.5951	0.000386757	0.0553416
Serpina1b	-27.2273	6.47219	12.5301	0.000400451	0.0553416
Cyp2f2	-24.2126	1.78334	12.4702	0.000413497	0.0557187
Ang	-12.0521	2.79982	12.4012	0.000429069	0.0559055
Klhl21	-3.77663	3.83446	12.3952	0.000430441	0.0559055
Shcbp1	8.53856	3.1082	12.4394	0.000420376	0.0559055
Cenpw	7.31503	2.0578	12.3514	0.000440645	0.0565495
Usp18	3.18166	7.25146	12.2543	0.000464185	0.058185
Gm45705	8.25614	1.82332	12.2662	0.000461226	0.058185
Akr1c6	-19.3973	3.78382	12.2128	0.000474632	0.0588107
H2.T24	2.39182	6.77776	12.1726	0.000484979	0.0594099
Ifi27l2a	4.51657	9.1481	12.0646	0.000513876	0.0615509
Bst2	3.42403	6.4733	12.0671	0.000513191	0.0615509
Upp1	7.86682	5.76842	12.0049	0.000530614	0.0628574
Slamf8	4.48535	4.3483	11.9758	0.000538945	0.0631503
Nampt	2.42446	7.00099	11.8545	0.000575217	0.0666757
Gc	-27.387	6.69065	11.7818	0.000598142	0.0685954
Serpina1c	-25.4056	6.31119	11.6861	0.000629681	0.0707293
Pccb	-4.59629	3.5825	11.6852	0.00062999	0.0707293
Alyref2	6.83971	1.66991	11.6516	0.000641485	0.0707293
Hspa2	8.46507	0.897176	11.6335	0.000647755	0.0707293
Kremen2	10.1828	1.32602	11.6283	0.000649555	0.0707293
Cmpk2	2.76819	7.02659	11.6087	0.000656456	0.0707659
Slc22a4	-8.27972	3.50739	11.5233	0.000687278	0.073355
Irgm2	5.01652	5.17581	11.4672	0.000708346	0.0741356
Mgll	-4.89891	4.39977	11.481	0.000703127	0.0741356
Fgg	-29.3022	5.45342	11.4416	0.000718173	0.0744414
Bak1	3.64837	5.16564	11.3587	0.000750948	0.07637
Gab3	-5.04258	3.25847	11.3604	0.000750257	0.07637
Ifit1bl1	2.67306	7.64309	11.2973	0.000776207	0.0782011
Hpgd	-8.4177	3.58998	11.2142	0.000811755	0.0802819
Rasa4	3.6053	3.8774	11.2185	0.000809875	0.0802819
Oasl1	5.68195	5.15702	11.1877	0.000823395	0.0806927
Gm6548	2.90687	5.02798	11.1039	0.000861457	0.0836622
Acod1	5.4031	6.37685	11.0443	0.000889589	0.0856229
Serpinf1	-21.0755	2.57508	11.01	0.000906223	0.0864521
Ces2g	-9.08355	2.61523	10.9785	0.000921774	0.086804
Slfn9	4.53491	4.13193	10.9575	0.000932258	0.086804
Gbp3	2.88513	7.08111	10.9539	0.000934069	0.086804
Bend6	10.8339	0.846958	10.8952	0.000964132	0.088832
Itih2	-19.6724	2.67202	10.8186	0.00100484	0.091307
Snapin	-2.72066	5.01468	10.8054	0.00101204	0.091307
Cdkn1b	-2.90389	6.31809	10.7974	0.0010164	0.091307
Serpina1a	-22.4384	5.68433	10.7708	0.00103115	0.0918662
Tap1	2.64192	7.48037	10.7515	0.00104197	0.0919699
Nuf2	5.3264	3.86267	10.7384	0.00104938	0.0919699
Slfn5	3.05416	7.54139	10.72	0.00105981	0.0921354
Camk1d	-2.87463	4.67374	10.5978	0.00113219	0.0925804
Clec4a1	-7.44169	2.66617	10.673	0.00108708	0.0925804
Tmem56	-16.6166	1.84219	10.6245	0.00111597	0.0925804
Lyrm9	-4.06448	4.00812	10.5992	0.00113137	0.0925804
Tfec	4.57188	3.02513	10.5832	0.00114122	0.0925804
Melk	10.1483	2.88916	10.6554	0.00109749	0.0925804
Parpbp	8.10206	2.14053	10.6464	0.00110287	0.0925804
Il27	7.13001	1.83297	10.6504	0.00110045	0.0925804
Cdk13	-3.30148	4.42533	10.5815	0.00114223	0.0925804
Cops7b	5.4393	2.24691	10.5671	0.00115116	0.0926081
Slc2a6	3.41391	5.54263	10.5516	0.00116086	0.0926969
Dhx34	5.10704	2.30612	10.4276	0.00124145	0.0953592
Dscc1	7.90467	1.84366	10.4389	0.00123391	0.0953592
Gstm1	-5.9117	4.7342	10.4527	0.00122472	0.0953592
4932441J04Rik	13.9003	0.229018	10.419	0.00124728	0.0953592
Irgm1	2.55962	8.25618	10.4596	0.00122016	0.0953592
Gon4l	2.94204	3.97858	10.4783	0.00120782	0.0953592
Snrnp48	-3.00255	4.56106	10.3903	0.00126676	0.095494
Ackr1	-7.2535	3.73779	10.3963	0.00126268	0.095494
Crot	-2.23465	5.8057	10.2987	0.00133123	0.0996574
Psmb9	2.80825	6.86455	10.2668	0.00135448	0.100698
Rnf14	-3.52217	5.70366	10.2459	0.00136991	0.100742
Nat8f1	-7.13801	2.10792	10.2158	0.00139245	0.100742
Ifih1	2.68873	6.26589	10.2263	0.00138455	0.100742
Spdl1	8.81744	2.3648	10.2251	0.00138541	0.100742
Srf	3.5398	3.74756	10.0935	0.00148797	0.105528
Igtp	2.33845	8.9983	10.1067	0.0014773	0.105528
Adrb2	-2.58392	5.10284	10.0954	0.00148638	0.105528
Igsf8	6.04303	2.34281	10.0645	0.00151155	0.1065
mt.Nd5	-3.8129	6.30244	9.97744	0.0015847	0.110929
Serpina3n	-16.0553	1.98688	9.96429	0.00159605	0.111003
Ncapg	4.70422	4.27799	9.92206	0.0016331	0.112851
Selplg	2.5022	7.02105	9.84863	0.00169958	0.116697
Gstp3	-5.67993	4.02257	9.79116	0.00175352	0.118672
Psrc1	6.58157	2.54009	9.80468	0.00174068	0.118672
Gsta4	-12.288	1.86219	9.78296	0.00176136	0.118672
Ttc12	11.3736	0.678816	9.67536	0.00186756	0.124351
Serpina3k	-27.6151	7.45872	9.67421	0.00186873	0.124351
Znrf3	-8.05316	1.79244	9.65728	0.00188603	0.124732
Spag1	8.24076	1.54029	9.62846	0.00191585	0.125458
Lmnb1	4.39889	4.68975	9.62423	0.00192027	0.125458
Vtn	-26.9203	4.64542	9.6117	0.00193341	0.125555
Gsta3	-19.9793	4.22426	9.54293	0.00200721	0.129567
Irf1	2.81972	8.33598	9.35963	0.00221817	0.142332
Galnt9	5.84306	1.49299	9.30274	0.00228811	0.145093
Oas2	4.43582	4.86528	9.30572	0.0022844	0.145093
Ndufc1	-3.55374	4.4106	9.28314	0.00231272	0.145796
Ptpn1	2.36851	5.89782	9.25695	0.00234603	0.146331
mt.Nd1	-3.19826	9.19783	9.25514	0.00234836	0.146331
Gm6545	6.02913	2.62155	9.23905	0.00236907	0.146774
Ighv5.16	7.64442	1.33575	9.22647	0.00238541	0.146941
Adam15	4.45457	3.61722	9.21255	0.00240361	0.147221
mt.Cytb	-3.48122	9.73915	9.18634	0.00243828	0.148501
Chic1	-6.43787	1.51555	9.1696	0.00246069	0.149024
Tspoap1	9.43593	1.22218	9.11671	0.00253285	0.150697
1700096K18Rik	-6.91182	1.70583	9.09848	0.00255822	0.150697
Klhl18	3.37417	3.07721	9.1125	0.00253868	0.150697
Ndufs5	-3.21422	4.17891	9.09973	0.00255647	0.150697
Pkp3	3.28598	5.05827	9.13065	0.00251362	0.150697
Gm5960	9.88469	3.11089	9.02869	0.00265775	0.154331
Tlcd2	-9.15071	1.83423	9.00563	0.00269149	0.154331
H2.T.ps	4.62675	2.66467	9.0323	0.0026525	0.154331
Sh3tc2	-10.2884	1.67338	9.0095	0.00268579	0.154331
Fen1	2.98193	4.74333	9.01761	0.00267391	0.154331
Ifi206	2.52291	6.38948	8.9932	0.00270986	0.154562
Parp10	2.76727	5.903	8.96473	0.00275242	0.155346
Plxna4os1	7.29312	1.3677	8.97044	0.00274383	0.155346
Sp140	2.19055	7.54665	8.91792	0.00282386	0.158548
Mcm5	4.443	5.85324	8.88052	0.0028823	0.160991
Tnfaip3	2.97821	4.8199	8.82899	0.00296483	0.163994
Acox1	-3.77283	5.3065	8.82796	0.0029665	0.163994
Gbp7	2.78749	7.2091	8.79037	0.00302825	0.164601
Apoa1	-21.0232	5.37136	8.78418	0.00303854	0.164601
Sapcd2	10.6474	1.25711	8.79963	0.00301291	0.164601
Mlkl	3.90832	3.91739	8.80729	0.00300029	0.164601
Carf	7.7532	1.84729	8.75746	0.00308337	0.166194
Fam214a	-2.72776	4.44425	8.69905	0.00318376	0.170481
Tubb3	6.82741	2.86242	8.69289	0.00319455	0.170481
Serpina3g	2.933	8.0042	8.67696	0.00322258	0.17113
N4bp1	2.27991	4.93176	8.63388	0.00329969	0.174366
Pif1	7.51616	2.05336	8.62083	0.00332341	0.174763
Eef1akmt1	2.63604	4.07427	8.5947	0.00337142	0.176427
Ms4a6d	2.87476	6.20997	8.58357	0.00339211	0.176652
Cd55	-2.73879	7.05485	8.54155	0.0034713	0.179907
Gfi1b	6.86257	1.43631	8.53046	0.00349251	0.18014
Cpsf6	-1.78577	5.44694	8.49086	0.00356935	0.182923
Mup3	-19.9707	6.11817	8.46807	0.00361434	0.182923
Coro1c	2.407	5.07533	8.47774	0.00359519	0.182923
Ccrl2	4.59151	4.45161	8.47015	0.00361021	0.182923
Dennd1c	5.29621	2.71389	8.45723	0.00363595	0.183156
Gss	-4.50708	5.49904	8.43084	0.00368911	0.183379
Nlrc5	2.17127	7.2981	8.41614	0.00371905	0.183379
Gm18853	5.48506	3.53943	8.41303	0.00372542	0.183379
Pnpt1	2.53621	5.10586	8.44092	0.00366871	0.183379
Upf2	-2.24334	5.11107	8.41444	0.00372252	0.183379
Upb1	-7.73936	2.32195	8.398	0.00375635	0.184061
Gm15675	-2.72675	5.94465	8.37564	0.00380284	0.185496
Ephx2	-17.491	3.47843	8.33594	0.00388684	0.188739
Lcmt1	3.18797	3.95542	8.32664	0.00390679	0.188857
B3gnt5	-2.3836	6.12284	8.29522	0.00397496	0.191295
Spast	-1.96135	5.16242	8.23648	0.00410566	0.195836
Daxx	3.40422	3.37747	8.2403	0.00409703	0.195836
Rnf213	2.41412	8.12513	8.22737	0.00412632	0.195955
Egfr	-19.9671	1.84322	8.20686	0.00417322	0.196451
Itih3	-18.4216	3.62703	8.21405	0.00415673	0.196451
Sc5d	-2.44971	4.88741	8.17948	0.00423668	0.198295
Pbk	8.0533	2.96742	8.17414	0.00424917	0.198295
Plg	-26.1728	3.69436	8.15139	0.00430281	0.199932
Fstl1	-10.4393	1.41327	8.11881	0.00438083	0.200959
Hells	3.92354	3.8599	8.13129	0.00435079	0.200959
Pcif1	2.39002	3.95839	8.12272	0.0043714	0.200959
Stoml1	2.72691	4.58672	8.05881	0.00452829	0.204032
Ifi211	2.90741	5.86627	8.05315	0.00454245	0.204032
Ptges	8.00412	1.89489	8.0553	0.00453708	0.204032
Gm13340	-3.85092	3.29102	8.071	0.00449794	0.204032
Crebbp	-2.50557	4.55412	8.06564	0.00451126	0.204032
Il3ra	7.38745	1.01274	8.04533	0.00456212	0.204065
Noct	-3.30949	3.872	8.03653	0.00458432	0.204211
Atf5	-6.10029	2.88981	8.01466	0.00464001	0.204997
Polr2i	3.6279	3.22204	8.01955	0.0046275	0.204997
Hk3	3.11289	4.91943	8.0062	0.00466175	0.205117
Gins3	3.41354	3.12042	7.98306	0.00472171	0.206911
Slc15a3	3.09846	4.55046	7.95538	0.00479445	0.209248
Pck1	-17.0729	2.93545	7.93246	0.00485558	0.211061
4930599N23Rik	8.98879	1.43687	7.9088	0.0049195	0.212747
Tmx4	-2.49044	4.34191	7.87159	0.00502174	0.212747
Gbp8	2.42249	5.82127	7.85359	0.00507199	0.212747
Prc1	5.73556	4.37931	7.88592	0.00498212	0.212747
H2.DMb1	2.54923	5.05545	7.8789	0.00500149	0.212747
Usf3	-2.88165	4.85065	7.88173	0.00499367	0.212747
Tubgcp2	2.6447	4.22813	7.9002	0.00494293	0.212747
Fabp1	-27.6539	6.28158	7.85574	0.00506597	0.212747
Rrm1	2.41335	5.95083	7.86042	0.00505286	0.212747
Iigp1	3.88014	7.30418	7.8458	0.00509388	0.212837
Sft2d3	5.52134	2.19796	7.82779	0.00514491	0.214139
4933407K13Rik	13.5971	1.13563	7.81362	0.00518539	0.214171
Serpina1d	-27.0339	5.71683	7.8195	0.00516855	0.214171
Glrx	3.60428	5.18387	7.76881	0.00531561	0.215515
E130215H24Rik	6.62504	1.1063	7.77294	0.00530347	0.215515
Ifi35	2.20699	6.97254	7.76279	0.00533334	0.215515
Gbp4	2.49518	7.17934	7.76655	0.00532226	0.215515
Inmt	-19.3492	3.9694	7.76125	0.0053379	0.215515
Gm16104	8.57822	1.37209	7.76411	0.00532946	0.215515
Ces1d	-11.2794	2.38834	7.72459	0.00544737	0.217491
Pstpip1	2.3658	6.41374	7.73256	0.00542339	0.217491
Kif2c	6.56407	3.32563	7.72756	0.00543841	0.217491
Trp53inp2	-5.9167	2.25867	7.69315	0.00554308	0.219685
Fcgr1	3.83269	5.35811	7.69942	0.00552385	0.219685
Akr1e1	-4.29899	2.98242	7.66922	0.00561708	0.220251
Ogfr	2.06135	6.95885	7.6667	0.00562491	0.220251
Rpusd1	8.49224	0.864119	7.66217	0.00563907	0.220251
Fah	-7.8955	3.60496	7.67493	0.00559931	0.220251
Stat2	2.53061	6.08006	7.64706	0.00568648	0.221301
Car3	-15.5409	4.55751	7.61087	0.00580174	0.224974
Hmgcs2	-16.7096	3.81186	7.59353	0.00585783	0.226335
Eml5	-5.18632	2.68448	7.58293	0.00589235	0.226855
Sesn1	-1.76549	6.35986	7.5434	0.00602303	0.230318
Trim30a	2.14222	8.19176	7.5428	0.00602503	0.230318
Lpl	4.6204	5.0547	7.53008	0.00606771	0.23113
Cyp4v3	-3.29624	3.93852	7.50281	0.00616029	0.233831
Hook3	-2.46098	4.89484	7.49473	0.00618799	0.234058
Ube2w	-2.45148	4.3901	7.4667	0.00628508	0.235285
Dmtn	-5.8641	4.33013	7.46646	0.0062859	0.235285
Tmem106b	-2.12116	5.85972	7.47171	0.0062676	0.235285
Ddx58	2.13616	7.04025	7.44323	0.00636755	0.23743
Kif15	4.58437	3.65501	7.43767	0.00638725	0.23743
4833420G17Rik	-1.88033	6.63204	7.39705	0.0065331	0.24185
Timeless	4.11272	3.34058	7.39212	0.00655104	0.24185
Cdc37l1	-2.50719	4.81722	7.38266	0.00658556	0.242295
Ccdc51	4.11962	2.6928	7.36992	0.0066324	0.243188
Znfx1	2.15858	6.46602	7.31134	0.00685207	0.248705
Ncaph	7.961	4.08093	7.31997	0.00681924	0.248705
Eif2a	2.0918	5.57591	7.31703	0.00683041	0.248705
Tmem63b	-5.23017	2.34508	7.26949	0.00701356	0.251148
Tars2	2.33011	4.55378	7.2781	0.00698005	0.251148
Ext1	-2.2152	4.21072	7.25957	0.00705241	0.251148
Zfp945	-2.337	5.00922	7.28235	0.00696353	0.251148
Gm20139	11.5748	1.47089	7.25844	0.00705684	0.251148
Utp14a	1.54891	5.8744	7.24604	0.00710577	0.251148
Ppie	2.57724	4.34945	7.24966	0.00709144	0.251148
Cyp2e1	-17.6409	4.61942	7.24625	0.00710494	0.251148
Nmi	2.11954	6.43279	7.23685	0.0071422	0.251611
Fam110a	9.13989	0.864823	7.20813	0.00725739	0.254009
Virma	2.06069	5.61801	7.2118	0.00724259	0.254009
Rasal1	5.49559	1.3031	7.15545	0.00747365	0.258751
Plod3	2.4345	4.94609	7.15346	0.00748197	0.258751
Cldn12	-10.3482	1.15289	7.1518	0.00748889	0.258751
Hcar2	4.48778	4.50785	7.16809	0.00742119	0.258751
Pgap1	-2.67356	5.31174	7.12056	0.00762048	0.262456
Fn3k	-6.33215	2.84623	7.0769	0.00780838	0.267123
Slfn8	2.36788	7.04656	7.07187	0.00783033	0.267123
Nipa1	-7.97192	4.53292	7.07338	0.00782374	0.267123
Tulp4	-3.74229	3.25223	7.04746	0.00793777	0.268729
Padi2	3.08047	3.33357	7.04421	0.00795219	0.268729
Tarsl2	-5.08293	2.33345	7.0515	0.00791989	0.268729
Trim30d	2.26141	6.20724	7.03339	0.00800037	0.269513
Rnase4	-5.33424	4.52141	7.00062	0.00814813	0.269947
Iqcc	-2.71683	3.61223	6.99901	0.00815549	0.269947
Atp5j	-2.76663	6.58394	7.00624	0.00812262	0.269947
Cdo1	-16.872	4.13848	7.01378	0.00808846	0.269947
Csf1	4.81125	3.05022	7.02218	0.00805061	0.269947
Samhd1	2.1057	9.38906	6.99725	0.00816351	0.269947
H2.T22	2.42459	8.75516	6.98197	0.00823348	0.27101
Lgals3bp	2.36626	5.16854	6.97927	0.00824593	0.27101
mt.Co3	-3.76808	2.94759	6.95393	0.00836351	0.273208
F2	-25.2094	3.89813	6.95707	0.00834886	0.273208
Lcor	-3.98399	3.98925	6.94407	0.00840976	0.273889
2500004C02Rik	-4.74686	2.65293	6.89415	0.00864782	0.278279
Apob	-21.4152	4.71253	6.89842	0.00862718	0.278279
Abcc3	-4.48335	2.49419	6.89662	0.00863587	0.278279
Hmmr	4.97629	3.59285	6.90875	0.00857751	0.278279
Clec2i	-2.30545	5.85974	6.87615	0.00873534	0.280259
Mastl	7.16715	1.92174	6.86754	0.00877754	0.280777
Fgl1	-14.989	2.45243	6.85963	0.00881648	0.281188
Cenpe	8.01798	3.94519	6.84977	0.00886528	0.281911
Gtf3a	1.92128	5.13096	6.81273	0.00905104	0.28417
Smad7	-4.19211	1.89096	6.80408	0.00909499	0.28417
Irf7	2.66328	9.14713	6.82506	0.00898878	0.28417
Ifi44	3.75292	5.49152	6.82497	0.00898921	0.28417
Sp110	1.69984	6.80682	6.79555	0.00913853	0.28417
Nqo1	-5.7262	4.20767	6.80846	0.00907272	0.28417
Adap1	3.24446	4.1463	6.79386	0.00914721	0.28417
Gm28437	-2.76707	5.2537	6.80288	0.0091011	0.28417
Psmb8	2.2916	8.53233	6.75558	0.00934551	0.289496
Sptlc1	2.11331	5.22362	6.74971	0.00937627	0.289617
Larp7	2.17982	5.27617	6.74215	0.00941611	0.290016
Slc16a3	3.1778	5.16309	6.73592	0.00944903	0.290201
Psmb10	2.8594	6.35857	6.71814	0.00954371	0.291448
Dennd2c	-3.94184	3.52354	6.7199	0.00953432	0.291448
Yipf3	4.02047	2.72493	6.70957	0.00958967	0.292024
Akt1	2.22473	5.36522	6.68659	0.00971408	0.294417
Zcchc2	2.43412	4.35415	6.67583	0.00977288	0.294417
Nacad	-11.5219	3.19055	6.67311	0.00978785	0.294417
Gm36551	7.09833	1.65772	6.6776	0.00976322	0.294417
Ifitm3	1.88406	8.69706	6.67003	0.00980478	0.294417
Fhdc1	-5.63294	3.6175	6.6632	0.00984241	0.294725
Cdk5rap1	-3.73828	3.40162	6.65297	0.00989907	0.295601
Gcc2	-2.44806	4.20918	6.6353	0.00999776	0.296137
Tubg1	3.1171	3.64244	6.6356	0.00999606	0.296137
Tnfaip2	2.20585	7.02723	6.635	0.00999941	0.296137
Agmo	-9.4246	2.14578	6.62677	0.0100457	0.296231
Phf11c	2.59503	4.9825	6.61981	0.0100851	0.296231
Siva1	2.92635	3.01246	6.62064	0.0100804	0.296231
Armcx1	6.56577	1.64815	6.58001	0.010313	0.30003
Cit	-4.85513	3.80914	6.56694	0.010389	0.30003
Tmem106a	3.14377	3.86955	6.57694	0.0103309	0.30003
9830144P21Rik	-17.175	1.50182	6.56349	0.0104092	0.30003
Parp9	1.77277	7.54952	6.56611	0.0103939	0.30003
Kif18b	8.82287	1.04507	6.57119	0.0103643	0.30003
St8sia4	-2.16307	6.08034	6.57068	0.0103672	0.30003
Uhrf1	5.45229	3.54249	6.5553	0.0104572	0.30061
Pcx	-6.91393	4.34024	6.54879	0.0104956	0.30091
Insig2	-2.98116	3.60207	6.53743	0.0105628	0.301234
H2.Q7	2.44822	7.78604	6.54112	0.0105409	0.301234
Ghr	-15.2726	1.99144	6.52956	0.0106096	0.301773
Dennd1a	5.46686	1.57409	6.51808	0.0106784	0.302928
Slc38a5	-5.82798	5.101	6.47161	0.0109611	0.305993
Txnrd1	3.00821	3.68733	6.47228	0.010957	0.305993
Prmt5	2.37609	5.07422	6.47891	0.0109162	0.305993
Inpp4b	-1.82728	5.36985	6.47698	0.010928	0.305993
Taok1	-1.70622	5.71872	6.46773	0.0109851	0.305993
Mug1	-21.8156	4.60799	6.49456	0.0108205	0.305993
Gpi1	2.08418	7.10839	6.48696	0.0108669	0.305993
Oaf	-11.5912	1.8344	6.46181	0.0110218	0.306223
Zfand6	-3.07607	8.80251	6.44198	0.0111454	0.308864
Amotl2	6.5586	1.23279	6.42871	0.011229	0.310382
2010111I01Rik	2.48897	4.7854	6.4149	0.0113167	0.31129
B430306N03Rik	2.31776	4.38747	6.4054	0.0113774	0.31129
Fgfrl1	-5.2839	3.40044	6.40565	0.0113758	0.31129
Rbmx2	4.11833	2.4651	6.40652	0.0113702	0.31129
Syne3	4.33249	3.26946	6.39363	0.011453	0.312567
Gys1	5.81611	1.41199	6.37962	0.0115438	0.313457
Wars	2.74342	5.49872	6.38384	0.0115164	0.313457
4930522L14Rik	-4.2718	2.97982	6.37465	0.0115762	0.313547
Ptgir	4.50234	2.71498	6.3478	0.0117527	0.313932
Egln2	2.31446	4.63319	6.34592	0.0117652	0.313932
Rab20	4.49842	3.16525	6.35321	0.0117169	0.313932
Bad	2.9277	3.41101	6.35185	0.0117259	0.313932
Vsig10	-5.09645	1.32268	6.34728	0.0117562	0.313932
Pclaf	4.84309	5.26397	6.34706	0.0117576	0.313932
mt.Co1	-3.08764	14.1113	6.32896	0.0118782	0.316166
Cers6	1.7264	6.13782	6.32132	0.0119295	0.316748
Slc4a2	4.02659	2.334	6.30126	0.0120652	0.318393
Hfe2	-10.9626	2.24766	6.29908	0.01208	0.318393
Ifi205	3.84006	5.6179	6.30164	0.0120626	0.318393
Oip5	-3.27877	3.9657	6.27747	0.0122283	0.321514
Mgat4a	1.88921	5.13718	6.26234	0.0123331	0.323481
Epsti1	1.67985	7.49904	6.24192	0.0124761	0.326439
Pes1	1.99581	6.01646	6.23427	0.0125302	0.326908
Gm6637	6.59254	3.11074	6.23051	0.0125567	0.326908
Rint1	-3.01727	3.39713	6.22652	0.012585	0.326908
Kif3c	3.99958	2.77547	6.20336	0.0127508	0.328859
B130034C11Rik	-10.0597	0.68385	6.18858	0.0128578	0.328859
Tars	1.53816	5.48923	6.1822	0.0129042	0.328859
Pask	8.13906	1.27573	6.19282	0.012827	0.328859
Edc4	2.53098	4.0865	6.20361	0.012749	0.328859
Zfp784	5.52001	1.73937	6.18638	0.0128737	0.328859
Smarcc2	-2.93173	3.18758	6.19586	0.0128049	0.328859
Dmxl2	-4.4147	3.44845	6.19412	0.0128175	0.328859
Gm42547	-6.47116	1.30961	6.17511	0.012956	0.32887
Prf1	3.3578	6.35506	6.17379	0.0129656	0.32887
Amigo1	7.09762	1.55672	6.10503	0.0134798	0.331641
D030056L22Rik	-2.54845	4.41226	6.09762	0.0135364	0.331641
Angptl3	-15.8315	3.10598	6.10302	0.0134951	0.331641
Cchcr1	7.44218	1.80736	6.11392	0.0134121	0.331641
Ppp1r35	4.54088	1.51004	6.10208	0.0135023	0.331641
Nfkbia	1.87868	5.63725	6.14236	0.0131981	0.331641
Kctd10	1.5225	5.98891	6.14338	0.0131905	0.331641
Pdcd7	2.89691	3.56824	6.09891	0.0135265	0.331641
Gm28661	-3.41131	4.27133	6.14752	0.0131596	0.331641
Fgf1	-12.9789	1.45767	6.12906	0.0132978	0.331641
Timm17b	-2.26426	5.02674	6.10161	0.0135059	0.331641
Pdcd1	7.42471	3.189	6.12484	0.0133295	0.331641
Stip1	2.25555	5.03382	6.13251	0.0132719	0.331641
Fbxl3	-1.94047	6.09816	6.13363	0.0132635	0.331641
Map4k5	-3.81733	6.41177	6.12008	0.0133654	0.331641
Pigr	-13.2698	2.89528	6.09222	0.0135778	0.331903
Ifi208	3.12551	6.06423	6.08726	0.013616	0.332082
Hck	1.88113	8.19021	6.07689	0.0136962	0.332957
Sympk	1.92442	4.79858	6.07464	0.0137136	0.332957
AI837181	2.364	4.98047	6.05927	0.0138335	0.334146
Il12rb1	3.96341	3.04752	6.05645	0.0138556	0.334146
Tor3a	2.3332	5.23792	6.06085	0.0138211	0.334146
Gsap	1.96816	6.07609	6.04652	0.0139337	0.33528
Ttll5	6.39674	0.63672	6.02197	0.0141289	0.339218
Fn3krp	-3.33091	3.36927	6.01711	0.0141678	0.339398
Itih4	-20.087	4.27543	5.98655	0.0144154	0.343886
2610005L07Rik	-6.34504	1.59705	5.98221	0.0144509	0.343886
Haus4	2.83003	4.06335	5.98347	0.0144405	0.343886
H2.Q10	-4.16649	6.27807	5.97261	0.0145298	0.345002
Flot2	2.98452	3.68499	5.95978	0.0146358	0.345549
Snx33	-4.35725	2.14289	5.95951	0.0146381	0.345549
Gorasp2	-3.01194	3.63265	5.9582	0.014649	0.345549
Trpm2	2.70792	4.74185	5.94222	0.0147824	0.347935
Zfp146	-2.22307	4.34437	5.93154	0.0148723	0.348528
Il1rn	2.67322	5.46631	5.93468	0.0148457	0.348528
Anp32e	-2.72933	7.0375	5.92341	0.014941	0.34938
Herpud1	-1.73782	5.07645	5.91717	0.014994	0.34986
2010005H15Rik	7.32585	1.60203	5.90845	0.0150684	0.350081
Tagap	1.6565	6.4615	5.9102	0.0150534	0.350081
Plpp1	-5.4347	2.77756	5.89375	0.0151947	0.352255
Atp5g2	2.23593	5.29403	5.87984	0.0153152	0.353529
Rom1	4.4218	3.21231	5.88004	0.0153135	0.353529
Nfib	-9.65018	2.11137	5.87298	0.015375	0.354151
Bckdhb	-4.60177	2.76096	5.85479	0.0155347	0.357066
Gmppb	3.42494	3.89102	5.82976	0.0157573	0.361301
D930016D06Rik	-4.8233	2.74198	5.82656	0.015786	0.361301
Fbxo34	-2.50889	3.75728	5.79774	0.0160468	0.361782
Snw1	1.56094	6.81188	5.79924	0.0160331	0.361782
Tceanc	-4.13901	2.50785	5.80171	0.0160106	0.361782
Ptprcap	1.93203	6.03819	5.8047	0.0159834	0.361782
Capg	2.07555	6.72072	5.7958	0.0160645	0.361782
Galnt4	-3.06709	3.7295	5.80524	0.0159785	0.361782
Thrsp	-16.4987	2.96872	5.79915	0.0160339	0.361782
Sgf29	2.12733	3.58863	5.7946	0.0160755	0.361782
Fanca	3.32244	3.58204	5.78895	0.0161272	0.36208
Qdpr	-2.45486	4.63235	5.78583	0.0161559	0.36208
Hormad2	-7.78327	1.19109	5.75418	0.0164494	0.366374
Dnase1l2	7.28558	1.54055	5.76069	0.0163887	0.366374
Rtp4	2.0804	6.63465	5.75629	0.0164298	0.366374
Lpcat1	-1.92695	4.84459	5.73434	0.0166364	0.367856
Cript	-3.05641	8.50036	5.73263	0.0166525	0.367856
Slc27a2	-8.46849	2.74362	5.73942	0.0165883	0.367856
Slc14a1	-3.49758	4.19449	5.73847	0.0165973	0.367856
Fcgr4	2.38038	8.03634	5.72645	0.0167113	0.3684
Itm2c	1.95294	5.41951	5.7135	0.0168349	0.370369
Glce	-3.60203	3.25532	5.70935	0.0168748	0.37049
Hsh2d	2.28641	4.99425	5.69391	0.0170239	0.372246
Mtr	-2.46576	4.7751	5.69473	0.0170159	0.372246
Sgo1	5.99899	2.48784	5.68727	0.0170884	0.372901
Plekha1	-1.72573	5.00264	5.68121	0.0171475	0.373435
Ckap5	2.09023	5.28229	5.65766	0.0173793	0.37532
AA467197	6.14122	2.05912	5.65761	0.0173798	0.37532
Gm43860	5.75399	1.04259	5.62347	0.0177215	0.37532
Celsr1	5.52339	0.916933	5.62632	0.0176927	0.37532
Ttc23	-8.8569	1.1351	5.63935	0.0175617	0.37532
Ighd	-1.92129	7.02936	5.64629	0.0174924	0.37532
Fmr1	-2.00944	5.11445	5.63575	0.0175979	0.37532
Sycp2	-3.93528	2.28648	5.63785	0.0175767	0.37532
Stra6l	-15.0427	1.37335	5.63055	0.0176501	0.37532
Arl8a	3.58947	2.76893	5.62913	0.0176644	0.37532
6720427I07Rik	-3.58691	3.02653	5.65201	0.0174354	0.37532
Appbp2	-1.72726	5.05208	5.63306	0.0176249	0.37532
Ace	-3.7404	4.52482	5.65978	0.0173583	0.37532
Galk2	2.35367	4.78249	5.62597	0.0176962	0.37532
Slfn4	2.82206	8.98638	5.61754	0.0177815	0.375853
Cxcl10	4.72226	4.79046	5.59074	0.0180556	0.377404
Ccdc25	2.56029	4.8144	5.584	0.0181253	0.377404
Tnfrsf9	5.0078	3.72135	5.59094	0.0180537	0.377404
Cc2d1b	2.5787	4.13217	5.59439	0.0180181	0.377404
Uqcc1	2.00415	4.64784	5.58306	0.018135	0.377404
Renbp	-4.11677	2.63493	5.58455	0.0181196	0.377404
Mex3b	-9.85151	1.05836	5.60304	0.0179294	0.377404
Igf1	-19.1315	3.64658	5.58935	0.01807	0.377404
Tk1	4.36528	3.86788	5.55151	0.0184647	0.382053
Dpy19l1	1.94746	5.21027	5.55356	0.0184431	0.382053
Ndufb9	-2.14608	6.14286	5.55564	0.0184212	0.382053
Ccdc88b	2.7291	5.34829	5.54255	0.0185595	0.382547
Stxbp6	-6.00132	1.68388	5.54524	0.018531	0.382547
Ctsc	1.74373	8.185	5.49589	0.0190612	0.384259
Mat2b	-2.4476	7.90258	5.47555	0.0192843	0.384259
Fermt2	-11.0716	1.43865	5.4983	0.019035	0.384259
Bbs4	4.68204	2.91826	5.4795	0.0192408	0.384259
Brms1	2.22352	4.42952	5.47641	0.0192748	0.384259
Mpnd	2.28067	4.93078	5.49447	0.0190767	0.384259
Zfp950	-2.2103	4.84678	5.53057	0.018687	0.384259
Gm10095	-2.0685	4.48711	5.51348	0.0188705	0.384259
Suox	-2.16521	3.8361	5.50577	0.0189539	0.384259
Ramp3	8.5168	0.852613	5.51749	0.0188272	0.384259
Fdx1	-4.73216	2.70493	5.49066	0.0191183	0.384259
Gm31718	6.05911	1.15194	5.48343	0.0191976	0.384259
Cog7	2.82554	3.30006	5.51022	0.0189057	0.384259
Phldb1	7.54276	0.670818	5.51924	0.0188085	0.384259
Psen1	1.38412	6.05746	5.47826	0.0192545	0.384259
Dstyk	-3.04952	3.80513	5.49279	0.0190951	0.384259
Arpc1b	2.23051	8.50728	5.49164	0.0191076	0.384259
Cdk4	1.94017	5.71863	5.49164	0.0191076	0.384259
Gem	3.3833	3.88489	5.47178	0.019326	0.38438
Cotl1	2.09211	7.2985	5.43093	0.0197832	0.386547
Col1a2	-12.7922	0.782444	5.44322	0.0196444	0.386547
Serpina1e	-22.2592	3.39147	5.43248	0.0197656	0.386547
Pkm	2.15213	8.33804	5.44237	0.019654	0.386547
Katnb1	4.16073	2.53343	5.43389	0.0197496	0.386547
Atg7	2.55075	4.13471	5.4454	0.0196199	0.386547
Parp12	2.00086	5.65034	5.43653	0.0197198	0.386547
A330040F15Rik	6.23536	2.49644	5.44095	0.01967	0.386547
Gtf2a2	-1.79765	5.38134	5.43001	0.0197935	0.386547
Col4a1	-7.72931	1.59399	5.43734	0.0197107	0.386547
Rtca	2.07045	4.36253	5.42265	0.0198771	0.387478
Gm36161	1.98048	5.1158	5.4065	0.0200619	0.387523
Kynu	-2.83396	3.90449	5.40122	0.0201226	0.387523
Osbpl8	-2.1299	6.98284	5.41112	0.0200089	0.387523
Cnp	1.8357	7.13341	5.41044	0.0200167	0.387523
Snx3	-2.46296	7.01476	5.40049	0.0201311	0.387523
Ybey	5.71	1.34587	5.41238	0.0199944	0.387523
Dnaja4	-3.54535	7.12744	5.40143	0.0201203	0.387523
Polr2c	-2.29272	7.19626	5.38894	0.0202648	0.388709
Ddx60	2.51478	5.2411	5.39186	0.0202309	0.388709
Ssh3	3.35289	2.81641	5.3825	0.0203397	0.389453
Tank	-1.65086	6.1404	5.36533	0.0205409	0.389497
Stap1	-2.17343	6.18235	5.35906	0.0206149	0.389497
Naa20	2.68896	5.02413	5.36251	0.0205741	0.389497
Ambp	-19.7296	4.92323	5.37186	0.0204641	0.389497
Gm29216	-3.16816	6.31349	5.37017	0.0204839	0.389497
Atg10	4.97372	2.50911	5.35896	0.020616	0.389497
Tceal9	-3.17728	3.66695	5.35769	0.0206311	0.389497
Reln	-5.44261	3.69098	5.36944	0.0204925	0.389497
Phyh	-2.05326	5.93704	5.35057	0.0207155	0.389725
Npc2	1.75315	8.09549	5.3534	0.0206819	0.389725
Pola2	2.26075	4.50442	5.34741	0.0207531	0.389754
Fam104a	-2.94251	4.43777	5.31753	0.0211119	0.390475
Tmem208	2.20071	4.56778	5.32917	0.0209714	0.390475
Sod2	-2.5812	7.57923	5.3112	0.0211888	0.390475
Zbtb26	-3.87911	2.51596	5.33192	0.0209383	0.390475
Vars	1.85032	5.54404	5.31262	0.0211715	0.390475
Layn	-5.54348	1.78505	5.33419	0.020911	0.390475
Fam234a	2.19696	4.7618	5.32864	0.0209777	0.390475
Tarm1	3.35044	3.38923	5.31981	0.0210843	0.390475
Aicda	8.39226	1.20009	5.32395	0.0210343	0.390475
Ythdf3	-1.72422	6.07307	5.3111	0.02119	0.390475
Tnfrsf1a	2.65503	3.76363	5.3154	0.0211377	0.390475
Tlr1	-1.54593	6.28233	5.30307	0.0212879	0.390613
Crlf2	4.37997	2.42969	5.30642	0.0212469	0.390613
Ly6a	2.51447	8.7326	5.28756	0.0214783	0.390613
Crisp3	-7.58696	1.63959	5.29193	0.0214244	0.390613
5430425K12Rik	-9.71775	0.996605	5.30059	0.0213182	0.390613
Ppp3cb	-2.03036	5.23478	5.2912	0.0214334	0.390613
Etv5	-6.39469	1.77848	5.2887	0.0214643	0.390613
Sox6	-4.6261	5.00923	5.28683	0.0214873	0.390613
Elmod2	-2.73956	4.02658	5.28138	0.0215547	0.391177
Prkrip1	2.61523	3.5682	5.24396	0.0220231	0.393714
Bcas2	-2.20288	6.08507	5.24741	0.0219795	0.393714
Plaur	2.6625	4.19663	5.26218	0.0217937	0.393714
Gm5069	5.26659	2.25659	5.24438	0.0220177	0.393714
Pole3	-2.01182	4.50232	5.24741	0.0219794	0.393714
Fxyd1	-14.3396	1.83278	5.25208	0.0219205	0.393714
Snrpf	2.11331	4.78954	5.2659	0.0217472	0.393714
Nln	2.11389	4.02123	5.25553	0.0218771	0.393714
Dhx58	2.98519	5.6811	5.25351	0.0219025	0.393714
Mzt1	-2.41851	5.43701	5.23451	0.022143	0.394548
Ifi207	1.8816	5.32239	5.23692	0.0221124	0.394548
Tmem241	3.57338	2.48609	5.22747	0.0222329	0.395491
Snx20	1.91092	5.51343	5.22462	0.0222693	0.395491
Dok3	2.46343	4.44499	5.2177	0.022358	0.396008
Gpr171	1.76338	5.92416	5.21663	0.0223719	0.396008
Haspin	3.58552	3.44984	5.21089	0.0224458	0.396013
Col27a1	-8.87925	0.779298	5.20372	0.0225386	0.396013
Anapc5	1.46774	7.6708	5.20239	0.0225558	0.396013
Aldh4a1	-4.01716	2.9951	5.20732	0.022492	0.396013
Pi4k2a	2.28351	4.17063	5.20486	0.0225239	0.396013
Fam60a	-3.70894	3.66917	5.19942	0.0225944	0.396045
Aldh6a1	-3.24617	3.027	5.19181	0.0226936	0.396114
Agpat2	-2.91462	3.7373	5.19066	0.0227086	0.396114
Pkig	-3.61955	3.36508	5.19542	0.0226465	0.396114
Fgb	-19.185	5.23427	5.18587	0.0227713	0.396567
Siglecg	-1.74393	5.62608	5.17543	0.0229085	0.397032
Frmd8os	-7.27318	1.59622	5.17556	0.0229068	0.397032
Enpp2	-13.2785	2.50495	5.17768	0.0228789	0.397032
Dnajc16	-3.20856	2.4547	5.12482	0.023586	0.40023
Acp2	1.81828	5.09537	5.13045	0.0235097	0.40023
Sparc	-13.2903	2.37959	5.15645	0.0231601	0.40023
Tppp3	2.76651	5.59608	5.13546	0.0234419	0.40023
Apoh	-18.2233	4.93	5.11934	0.0236606	0.40023
Cebpb	2.71298	2.95806	5.13785	0.0234096	0.40023
Clec2g	10.1309	1.14007	5.1111	0.0237733	0.40023
Ifi213	2.33051	7.21726	5.11822	0.0236759	0.40023
Eif6	1.93292	5.8234	5.12652	0.023563	0.40023
Arhgap9	1.55556	7.0814	5.10926	0.0237985	0.40023
Chaf1a	4.83796	2.51339	5.14748	0.0232801	0.40023
Ppm1b	-2.2956	6.48651	5.1509	0.0232343	0.40023
Nubp2	2.04739	5.37095	5.12106	0.0236372	0.40023
Rbm43	1.43144	5.95442	5.13891	0.0233953	0.40023
Usp40	-2.55547	3.95666	5.13896	0.0233947	0.40023
Cenpb	2.28348	4.90243	5.15364	0.0231977	0.40023
Igfbp5	-12.4704	1.67748	5.11035	0.0237836	0.40023
Zbtb20	-3.80569	2.87838	5.14151	0.0233603	0.40023
Dcp1b	2.42655	3.30628	5.1138	0.0237363	0.40023
Rpl35a.ps2	-4.71213	1.95054	5.0957	0.0239853	0.402744
Sparcl1	-9.88367	1.91878	5.07503	0.0242728	0.403824
Snx8	1.95413	4.55855	5.07492	0.0242744	0.403824
Retsat	-6.17616	2.80626	5.07724	0.0242419	0.403824
Zfp874b	-1.83208	5.28552	5.08584	0.024122	0.403824
Acot7	2.25893	4.85268	5.0773	0.0242411	0.403824
Tmem26	-5.88243	2.16462	5.08159	0.0241812	0.403824
Lgmn	-2.07687	6.31488	5.06294	0.0244428	0.405562
C2	-9.06077	0.681431	5.05681	0.0245294	0.405562
Casp1	1.671	6.86625	5.05906	0.0244975	0.405562
Gm11274	5.21513	3.40628	5.06131	0.0244657	0.405562
Psme2	1.69693	8.05167	5.05358	0.0245751	0.405696
2011-09-01	1.71113	5.7124	5.04577	0.0246861	0.405799
Wdr83os	-2.71103	3.56607	5.04989	0.0246275	0.405799
Hist1h2bp	-9.63571	1.39001	5.0452	0.0246943	0.405799
Emp3	1.7744	6.54862	5.04093	0.0247551	0.40618
Usb1	1.85219	5.11142	5.03342	0.0248627	0.407325
Cep128	-2.17129	4.90306	5.02936	0.0249211	0.407662
Sec24a	-3.04589	3.44895	5.02253	0.0250196	0.408654
Dnajb9	-2.7451	3.65641	5.01047	0.0251944	0.409647
Fam234b	-5.62294	2.16781	5.01233	0.0251674	0.409647
Nmral1	3.27183	3.64431	5.01373	0.0251471	0.409647
Ighv5.6	4.22201	1.42127	5.00545	0.0252676	0.410218
Zfp608	-2.78636	2.95306	4.99265	0.0254552	0.412643
Fga	-19.9444	4.47649	4.98338	0.0255919	0.413479
Gm10603	-5.99743	2.93494	4.98467	0.0255728	0.413479
Dhx33	-2.54055	3.46274	4.98136	0.0256219	0.413479
Hcls1	1.74227	7.74326	4.97662	0.0256921	0.413992
Gm32633	3.7759	2.57163	4.97004	0.0257901	0.414951
Bambi	5.39557	0.840512	4.95884	0.0259577	0.41548
Homez	-2.97183	2.38046	4.94222	0.0262084	0.41548
Mrgpra2a	5.97282	1.655	4.95905	0.0259545	0.41548
Ncoa4	-3.77571	10.0398	4.95226	0.0260566	0.41548
Tapbp	1.61477	7.34229	4.95461	0.0260212	0.41548
Lgals3	1.8531	7.89041	4.94745	0.0261291	0.41548
Igf2bp3	5.915	1.64449	4.94463	0.0261719	0.41548
4930453N24Rik	-1.46993	6.35355	4.94531	0.0261615	0.41548
Sh3d19	-4.06437	3.94119	4.94346	0.0261896	0.41548
Cd274	1.8402	5.70433	4.95778	0.0259735	0.41548
Ccnf	5.77115	2.25479	4.91669	0.0265984	0.415801
Dpp3	2.02327	5.33594	4.9214	0.0265261	0.415801
Sacm1l	-1.57297	5.69473	4.91752	0.0265857	0.415801
Coq8a	-2.30616	3.78668	4.93582	0.0263056	0.415801
Smarca4	2.28377	5.2311	4.91566	0.0266143	0.415801
Wdyhv1	-2.79142	3.77975	4.92272	0.0265058	0.415801
Gmnn	3.83295	3.79803	4.93399	0.0263334	0.415801
Rora	-4.24018	2.58157	4.92468	0.0264757	0.415801
Lmbrd1	-1.39939	6.20309	4.92803	0.0264244	0.415801
Ccnd2	1.44874	6.16581	4.91725	0.0265898	0.415801
Stil	6.70808	2.09107	4.91282	0.0266581	0.415882
Zmym5	-2.08593	5.51952	4.89811	0.0268861	0.417626
1700030K09Rik	4.45219	2.97101	4.89847	0.0268805	0.417626
Gars	1.71376	6.92273	4.90035	0.0268513	0.417626
Ncapd2	2.76167	4.95357	4.89017	0.02701	0.418946
Cenpq	-3.25113	6.11951	4.88259	0.0271289	0.419005
Gm26917	5.50987	1.5742	4.88615	0.027073	0.419005
Tpk1	-5.87033	1.57985	4.8825	0.0271304	0.419005
C3	-4.09215	7.55131	4.87319	0.0272771	0.420668
Sssca1	5.30436	1.29565	4.85266	0.0276035	0.423487
Gpatch3	2.91954	2.55716	4.85353	0.0275897	0.423487
Ar	-6.243	1.2578	4.84742	0.0276875	0.423487
Aurka	4.42838	2.89284	4.84692	0.0276956	0.423487
Keap1	1.67393	4.72678	4.85776	0.027522	0.423487
Mrpl36	-1.64146	4.68636	4.85002	0.0276458	0.423487
Fbxw17	3.7022	3.34974	4.84111	0.027789	0.424314
B3gnt9	6.21485	0.493222	4.8333	0.0279151	0.425035
Gpt2	-8.42861	1.73436	4.83424	0.0279	0.425035
Slc23a1	-8.06186	3.63678	4.83033	0.0279632	0.425167
Gm26510	3.57974	2.78851	4.8269	0.028019	0.425415
Fam78b	5.71058	1.40557	4.82276	0.0280864	0.425839
Phf12	2.59822	3.19082	4.81449	0.0282214	0.426318
Brpf3	-3.43075	4.09583	4.78053	0.0287832	0.426318
Rhov	7.42991	0.497369	4.78101	0.0287752	0.426318
Dst	-5.38645	0.941446	4.78043	0.0287849	0.426318
Scd1	-2.21932	7.51213	4.81536	0.0282072	0.426318
Oas1c	1.88775	4.54256	4.78428	0.0287207	0.426318
A130071D04Rik	5.55339	1.11963	4.80405	0.0283929	0.426318
Bpifa1	-9.07613	1.14128	4.77907	0.0288076	0.426318
Osbpl3	2.6478	4.48729	4.79367	0.0285645	0.426318
Psat1	2.51139	4.95187	4.79906	0.0284753	0.426318
Jaml	1.87769	6.22936	4.80995	0.0282959	0.426318
Smyd1	-7.33332	0.689428	4.7893	0.0286371	0.426318
Dnajc14	1.38105	5.63936	4.79902	0.028476	0.426318
Aagab	1.43731	6.01499	4.80644	0.0283536	0.426318
Serpinb6b	3.09888	6.61345	4.80612	0.0283589	0.426318
Top2a	3.94301	6.82054	4.80088	0.0284452	0.426318
Pola1	2.31224	4.03078	4.77775	0.0288298	0.426318
Cdc42ep4	2.23787	4.27775	4.7822	0.0287554	0.426318
Arg2	3.40594	4.02043	4.77364	0.0288986	0.42675
Ccdc93	-1.75424	4.74397	4.7684	0.0289868	0.427465
Trap1	1.85533	5.45294	4.76399	0.0290611	0.427976
Anxa2	1.93444	9.09085	4.75804	0.0291618	0.428873
Ptprv	5.03118	1.13179	4.7447	0.0293886	0.429566
Kansl1l	-3.22133	3.77975	4.75208	0.0292629	0.429566
Kif20a	3.99733	4.20999	4.74592	0.0293678	0.429566
Kcnn3	8.00259	0.35561	4.74356	0.0294082	0.429566
Il18bp	2.92031	5.28765	4.7443	0.0293955	0.429566
Tmem29	-2.92235	5.35806	4.73372	0.0295768	0.4297
Utp20	2.3871	4.01487	4.73479	0.0295584	0.4297
Alkbh6	3.99842	2.09621	4.73524	0.0295507	0.4297
Il7r	-1.77634	6.22587	4.73844	0.0294958	0.4297
Knop1	1.97282	4.78566	4.72706	0.0296915	0.430208
Gm32585	7.1562	1.26457	4.72732	0.0296871	0.430208
Pir	-5.81378	3.21383	4.72075	0.0298008	0.431211
Gnb2	2.17764	5.80512	4.71534	0.0298946	0.431989
Cpeb3	-5.94813	2.41812	4.70235	0.0301215	0.433248
Tma16	3.00844	2.57393	4.70153	0.0301359	0.433248
Hmox2	1.54794	6.00013	4.70115	0.0301425	0.433248
Trmo	2.50062	3.43395	4.70586	0.03006	0.433248
Ung	5.15421	1.85119	4.68156	0.030488	0.43763
Larp1b	-2.13216	5.15878	4.67341	0.030633	0.438063
Vill	2.35098	4.0756	4.67178	0.0306621	0.438063
Ndufb11	-2.16903	6.99388	4.67606	0.0305857	0.438063
Lin52	-5.70173	1.59369	4.67074	0.0306806	0.438063
Wasl	-2.47248	3.21576	4.66319	0.0308159	0.43896
Gpnmb	6.00678	0.749295	4.66269	0.0308249	0.43896
Gm35657	7.01012	1.1069	4.65322	0.0309954	0.440225
Leprotl1	1.46277	5.90294	4.65376	0.0309857	0.440225
Tceal8	-4.20057	5.06648	4.63077	0.0314035	0.440324
Uap1l1	2.50057	3.77699	4.63974	0.0312397	0.440324
Csgalnact2	-1.95138	5.06241	4.63106	0.0313981	0.440324
Dip2c	-5.88522	1.46518	4.6363	0.0313025	0.440324
Smg5	1.56532	5.20711	4.6315	0.0313901	0.440324
Mcm3	2.67911	5.64957	4.63481	0.0313296	0.440324
Gm43698	-5.48282	1.78849	4.63212	0.0313788	0.440324
Phgdh	2.55069	5.06089	4.63037	0.0314109	0.440324
Rnf6	-1.40199	5.09269	4.63683	0.0312928	0.440324
Faah	-2.35182	3.74268	4.63739	0.0312825	0.440324
Gm49024	-8.11521	2.23657	4.61929	0.0316144	0.441455
Cenpp	6.75038	2.03236	4.62257	0.0315539	0.441455
Ncdn	3.01714	2.67048	4.61953	0.0316099	0.441455
Bpnt1	-2.3746	3.50719	4.6148	0.0316972	0.442039
Mxra8	-7.41582	2.17957	4.60034	0.0319657	0.444647
Fmo2	-7.92638	1.33882	4.59893	0.0319918	0.444647
Irak1	-1.81793	5.49621	4.59807	0.032008	0.444647
Mdp1	1.48209	5.29895	4.59061	0.0321475	0.446011
Tubb5	1.90835	8.00377	4.58611	0.0322322	0.44661
Rufy2	-2.56985	3.66704	4.57833	0.0323788	0.448066
Snapc3	-2.64677	3.72914	4.57346	0.0324708	0.448764
Rad51ap1	5.73005	2.6349	4.56967	0.0325429	0.449184
Sos2	-2.88818	3.68073	4.56365	0.0326574	0.450188
Ddost	1.71059	6.73228	4.55887	0.0327486	0.450413
Paqr8	5.12681	1.37356	4.55585	0.0328065	0.450413
Hace1	-2.25418	4.53312	4.55406	0.0328408	0.450413
Plin2	1.88435	7.25693	4.55464	0.0328296	0.450413
Il33	-11.525	1.35841	4.5456	0.0330035	0.452068
Cnot4	-3.41975	3.62282	4.53577	0.0331936	0.454095
Ska3	11.3063	1.06306	4.52802	0.0333442	0.455577
Nop9	1.86964	4.71322	4.51945	0.0335116	0.457284
Itgb2l	5.71219	3.87614	4.51215	0.033655	0.458661
Zfp948	-5.19829	1.77378	4.50231	0.033849	0.460723
Ptdss2	-2.61714	4.33665	4.4943	0.034008	0.46172
Snd1	1.63268	5.48742	4.49462	0.0340017	0.46172
Cdc37	1.55462	5.81137	4.48792	0.0341351	0.462516
Zfp687	3.06929	2.415	4.48706	0.0341524	0.462516
Rffl	-2.1196	4.22227	4.47803	0.0343332	0.463799
D3Ertd254e	-5.67409	1.64819	4.47846	0.0343246	0.463799
Tmem39b	4.49011	1.18701	4.4737	0.0344204	0.464395
Tnfrsf18	2.14509	4.43732	4.47053	0.0344842	0.464675
Trem2	-5.29382	2.29181	4.46487	0.0345987	0.465636
Frat1	-2.86047	3.14969	4.45847	0.0347287	0.466085
Mre11a	1.97855	4.56097	4.45693	0.0347598	0.466085
Cfap36	-2.14832	3.86454	4.45684	0.0347618	0.466085
Chchd10	-3.953	4.78161	4.45429	0.0348137	0.466201
Gmds	5.26289	2.30062	4.44814	0.0349393	0.467302
Lypla2	2.13227	4.95548	4.43302	0.03525	0.468348
Prpf39	-1.88325	4.94648	4.43336	0.035243	0.468348
Mccc1	-3.60579	2.52513	4.43569	0.0351951	0.468348
Gas7	2.1839	4.40969	4.43166	0.0352782	0.468348
Zfp943	-1.90461	4.87129	4.4368	0.035172	0.468348
Taf10	1.36195	6.20049	4.43615	0.0351856	0.468348
Rnh1	1.82423	7.06525	4.42345	0.0354483	0.469163
Aif1	2.46952	4.50473	4.42282	0.0354613	0.469163
Sart1	1.70019	5.27112	4.4224	0.0354701	0.469163
Fgfbp3	-6.19425	1.62222	4.41104	0.035707	0.471717
Csrnp1	2.79329	3.57476	4.4071	0.0357897	0.472232
Lactb2	-2.10789	3.82415	4.40061	0.0359261	0.472296
Pld3	-2.30647	4.77962	4.40338	0.0358679	0.472296
Trf	-8.69193	5.09885	4.40227	0.0358911	0.472296
Fam26f	2.5763	4.46535	4.39809	0.0359792	0.472419
H13	1.44026	5.52096	4.39027	0.0361446	0.472862
Brip1	5.47149	2.80489	4.39428	0.0360597	0.472862
Neil3	6.8208	2.54911	4.39113	0.0361264	0.472862
Pik3c2a	-2.05612	4.8116	4.3857	0.0362415	0.473556
Cnn3	-2.49743	5.80296	4.37724	0.0364219	0.473819
Eif3j1	-1.6177	6.20225	4.38061	0.0363499	0.473819
Pi4k2b	-2.25968	5.12118	4.37651	0.0364375	0.473819
Zkscan3	-1.61437	5.39657	4.3818	0.0363247	0.473819
Smpdl3b	2.19012	6.05016	4.36933	0.0365913	0.475246
Clec5a	2.2529	4.7571	4.3611	0.0367686	0.476401
Elp2	1.8281	5.2422	4.36299	0.0367278	0.476401
Tmem221	5.31224	1.92788	4.35598	0.0368793	0.477261
Myh10	-6.36355	2.10718	4.35175	0.0369709	0.477342
B4gat1	-4.55026	1.78804	4.3502	0.0370045	0.477342
Sh3bp2	1.72381	4.87405	4.34957	0.0370183	0.477342
1600002K03Rik	3.47936	2.72454	4.3459	0.0370981	0.477798
Cdk8	-1.89825	4.86313	4.34011	0.0372245	0.478855
B3galnt2	-1.69307	4.84014	4.33207	0.0374008	0.480522
Tlr2	1.73842	5.47163	4.32811	0.0374878	0.480522
Usf1	1.63569	5.79255	4.32954	0.0374564	0.480522
Nupr1	2.28402	4.79538	4.32062	0.0376532	0.480926
Pank2	-1.44726	5.14537	4.32143	0.0376354	0.480926
Hdc	2.65095	7.33433	4.32382	0.0375824	0.480926
Hexa	1.38642	7.27503	4.31144	0.037857	0.482957
Madd	1.67588	5.46586	4.30531	0.0379935	0.48376
Tma7	-1.58045	7.81361	4.30459	0.0380097	0.48376
Prkcsh	1.92019	4.61073	4.30042	0.0381031	0.484376
Plac8	2.04504	10.284	4.29489	0.038227	0.48538
Aaed1	-1.73506	5.02256	4.28359	0.0384821	0.486286
Mical1	1.82206	5.73108	4.28174	0.0385239	0.486286
Mpeg1	1.45602	8.73793	4.28927	0.0383536	0.486286
Hes6	-2.01811	4.29456	4.2849	0.0384525	0.486286
Cnot10	1.7805	4.70505	4.28494	0.0384514	0.486286
Slc4a8	4.40366	1.85284	4.25351	0.0391693	0.486458
Tmem222	1.92316	4.39112	4.25453	0.0391459	0.486458
Pcyt1b	3.55259	3.15446	4.25645	0.0391015	0.486458
Map4k3	-2.80736	3.1646	4.26553	0.0388931	0.486458
Mst1	-7.97625	1.84159	4.25941	0.0390334	0.486458
Plekhj1	2.20029	3.51757	4.26757	0.0388466	0.486458
Kpna1	-1.95821	6.80288	4.25717	0.0390849	0.486458
Hpd	-15.5913	4.90716	4.26483	0.0389092	0.486458
Tor4a	1.35269	5.97129	4.27521	0.0386721	0.486458
Fanci	4.51073	3.03681	4.2661	0.0388801	0.486458
Mvp	2.19688	5.90256	4.2665	0.0388709	0.486458
Pym1	2.0721	4.96965	4.26005	0.0390188	0.486458
Ubald2	1.9563	4.89361	4.27717	0.0386277	0.486458
Rai14	-5.68878	1.85806	4.27386	0.0387029	0.486458
A130014A01Rik	3.51749	2.6559	4.24894	0.0392747	0.486645
A430033K04Rik	7.53218	1.12758	4.24988	0.0392531	0.486645
Stard3	1.73066	4.92264	4.23662	0.0395608	0.489307
Gm14862	-7.93653	2.93123	4.23579	0.0395803	0.489307
Ikbkb	-1.30258	5.97264	4.2271	0.0397833	0.491253
Papss1	1.66198	4.02237	4.21996	0.0399512	0.492762
Nfat5	-1.91813	4.76601	4.21289	0.0401178	0.493603
Tpp1	-1.89881	4.10624	4.21125	0.0401568	0.493603
Atp2b4	-2.74579	5.31855	4.21385	0.0400953	0.493603
Trbv13.2	2.79319	3.2849	4.20125	0.0403942	0.493707
Ssx2ip	-2.40047	3.97095	4.20607	0.0402796	0.493707
Maged1	-4.69875	1.77289	4.20276	0.0403583	0.493707
Trim58	-4.74159	3.34693	4.20538	0.0402959	0.493707
Vbp1	-2.05962	7.37618	4.20328	0.0403458	0.493707
Rragd	-4.39292	3.74546	4.19503	0.0405426	0.49496
Ddx18	2.27692	3.46035	4.18685	0.0407388	0.496231
Sec23ip	1.44672	4.62227	4.18824	0.0407055	0.496231
Abtb2	2.35349	4.3923	4.17284	0.0410768	0.498097
Pld1	-3.48898	2.71521	4.17383	0.0410529	0.498097
Kif18a	-3.49023	3.10294	4.17315	0.0410694	0.498097
Sik1	2.87886	2.98625	4.17295	0.0410743	0.498097
Gm20324	-5.57824	1.13959	4.16739	0.0412092	0.49858
Ttpa	-17.1058	2.97723	4.16856	0.0411809	0.49858
Hdac4	2.14029	4.10471	4.14336	0.0417982	0.499775
2003-03-01	-4.51128	6.92874	4.15189	0.0415881	0.499775
Arid5a	1.7255	5.0335	4.14467	0.0417659	0.499775
Ubap2l	-2.73547	3.40086	4.14083	0.0418607	0.499775
Rilpl1	5.05218	0.793347	4.15775	0.0414443	0.499775
Tapbpl	1.79643	5.34969	4.15447	0.0415247	0.499775
Podxl	-7.92504	1.5969	4.14298	0.0418076	0.499775
Zfp777	2.65101	2.93921	4.14088	0.0418594	0.499775
Tmem87a	1.85294	5.45403	4.14068	0.0418643	0.499775
Coro1b	1.71442	6.82321	4.14585	0.0417367	0.499775
Bcl2a1a	-2.82496	3.72189	4.14464	0.0417665	0.499775
Mlec	1.36998	6.86781	4.15453	0.0415232	0.499775
Acaa1a	1.77952	5.2695	4.13879	0.041911	0.49978
U2af2	1.62244	5.74419	4.13227	0.0420728	0.499819
Prelid3b	1.49635	4.91986	4.12344	0.0422931	0.499819
Wdr24	3.64597	2.55449	4.122	0.0423291	0.499819
Slc16a10	-3.28579	7.27088	4.12357	0.0422896	0.499819
Sppl2a	1.2394	6.99551	4.13286	0.0420583	0.499819
Klhl20	-3.20817	3.01526	4.12732	0.0421961	0.499819
Dctn5	1.4968	5.82045	4.1219	0.0423316	0.499819
Nfil3	2.61068	4.27664	4.12416	0.042275	0.499819
Smim20	-1.76128	4.60009	4.12476	0.0422601	0.499819
Ube2f	-3.11132	7.04506	4.11908	0.0424023	0.500105
Cd302	-3.31716	4.70691	4.10964	0.0426395	0.500352
Amz1	-4.02181	2.66767	4.11176	0.0425859	0.500352
Ivns1abp	-1.5315	6.81578	4.10901	0.0426552	0.500352
Dbnl	1.5761	5.67863	4.1111	0.0426026	0.500352
Tmsb10	1.64441	7.09496	4.11017	0.042626	0.500352
Emp1	2.79661	4.13392	4.09226	0.0430799	0.504236
Gle1	2.15867	4.83421	4.09302	0.0430606	0.504236
Fam76a	-2.64021	3.67026	4.0884	0.0431786	0.504843
Trmt5	2.86396	3.65611	4.08202	0.0433418	0.506202
Rph3al	-5.43322	3.32094	4.07751	0.0434577	0.50625
Rbm19	2.12389	3.89574	4.07638	0.0434868	0.50625
Tctn3	4.6922	1.72768	4.07869	0.0434272	0.50625
Ccar1	-1.38817	5.72278	4.0686	0.0436875	0.506945
Hyi	-2.69287	2.45585	4.07096	0.0436264	0.506945
Spp1	7.81916	2.72305	4.06913	0.0436737	0.506945
Tbc1d1	1.27907	5.59589	4.06661	0.043739	0.506996
Cdca2	4.89072	3.16661	4.04387	0.0443321	0.507616
Slx1b	3.6849	1.79346	4.05398	0.0440674	0.507616
Gm11613	5.15836	1.30698	4.04419	0.0443235	0.507616
Fam69a	-1.74773	5.2869	4.05173	0.044126	0.507616
Mfsd1	1.24527	6.23984	4.0429	0.0443575	0.507616
Sardh	-7.89354	3.42179	4.04498	0.0443029	0.507616
Ddx19b	1.88713	4.41758	4.05948	0.0439241	0.507616
Cdc25c	5.70555	1.81015	4.04978	0.044177	0.507616
Adk	-1.92177	5.62353	4.05258	0.044104	0.507616
Chchd7	-2.30613	3.75912	4.05572	0.044022	0.507616
Ndufa5	-2.21504	4.90665	4.04944	0.044186	0.507616
Fdft1	-2.22239	4.61133	4.04347	0.0443426	0.507616
S100pbp	-2.52862	3.39081	4.0403	0.044426	0.507861
Usp34	-1.40099	6.50842	4.03818	0.0444817	0.507958
Cops3	1.70023	5.62853	4.02522	0.0448248	0.508093
Gatad2a	1.66937	4.35262	4.0243	0.0448493	0.508093
Atp6v0a1	-3.16279	4.29015	4.02175	0.0449171	0.508093
Fgl2	1.5066	7.70106	4.0266	0.0447881	0.508093
Unc119	1.81307	6.10511	4.02151	0.0449235	0.508093
Lipc	-5.49578	2.87002	4.01942	0.0449791	0.508093
Naaa	1.61705	6.10859	4.02444	0.0448454	0.508093
Trim59	-2.39058	7.11756	4.01819	0.045012	0.508093
Atp11a	2.41746	3.96032	4.01934	0.0449812	0.508093
Aldh1a2	7.42324	0.87161	4.02516	0.0448264	0.508093
Ppp4c	1.451	6.67133	4.0209	0.0449396	0.508093
Gm16124	-2.84038	2.66634	4.01428	0.0451164	0.508739
Gbp11	4.43048	2.82624	4.00865	0.0452675	0.508956
Heca	-1.69283	6.34805	4.00834	0.0452758	0.508956
Zfp868	1.62062	4.19285	4.00748	0.0452988	0.508956
Lman2	1.46401	6.37404	4.00653	0.0453244	0.508956
Telo2	3.42929	2.83198	4.00141	0.0454621	0.509794
Hspb8	-10.7846	2.03074	4.00025	0.0454936	0.509794
Tgfbi	1.83261	7.42692	3.99618	0.0456036	0.510495
Ggt1	4.43188	3.33442	3.99066	0.045753	0.510849
Aunip	8.24683	1.29244	3.98977	0.0457774	0.510849
AI987944	-2.67701	3.83151	3.99271	0.0456974	0.510849
Dmap1	2.07313	3.74269	3.98793	0.0458273	0.510877
Abcb10	-2.17123	5.188	3.98104	0.0460151	0.51143
AW549877	-1.70182	5.30966	3.97965	0.0460531	0.51143
Dbi	-2.60984	5.34121	3.97396	0.046209	0.51143
Sftpc	-19.15	5.62176	3.97528	0.0461727	0.51143
Vdac2	1.48878	7.01479	3.98228	0.0459813	0.51143
Spryd3	2.23872	4.61756	3.97662	0.046136	0.51143
Rps6kc1	2.39753	3.31275	3.97557	0.0461648	0.51143
Bcl3	5.0073	0.835973	3.97196	0.0462638	0.511512
Tada3	4.39735	2.08879	3.95927	0.046614	0.512754
Selenok	-2.60586	7.54393	3.96056	0.0465781	0.512754
Ykt6	1.3659	6.09442	3.96003	0.0465928	0.512754
Mcm6	1.63789	6.99211	3.96381	0.0464885	0.512754
Tnfaip8l2	1.68243	6.24188	3.96204	0.0465372	0.512754
Armcx5	-3.74263	3.13183	3.93755	0.0472194	0.513295
Zfp410	2.31905	4.81539	3.93469	0.0472998	0.513295
Mmp14	-6.05818	2.18797	3.93396	0.0473205	0.513295
Bivm	-4.58086	2.35102	3.95021	0.0468656	0.513295
Tmem80	-2.0436	4.08104	3.95276	0.0467947	0.513295
Psma4	1.44336	7.20744	3.93936	0.0471688	0.513295
Slfn2	1.59838	9.36441	3.94808	0.0469249	0.513295
Wdr43	1.35503	5.79352	3.94221	0.047089	0.513295
Prmt2	3.52746	2.25013	3.93362	0.0473298	0.513295
Tomm34	1.49144	4.94922	3.93586	0.047267	0.513295
Sorcs2	3.88984	2.03556	3.93948	0.0471655	0.513295
dh	1.79481	7.41984	3.95486	0.0467362	0.513295
Atp8b4	1.37091	6.19166	3.94135	0.0471129	0.513295
Tspan8	-3.54574	5.29921	3.94283	0.0470715	0.513295
Natd1	4.35761	1.81166	3.91158	0.0479546	0.513457
Gstk1	-3.91698	2.83746	3.9119	0.0479454	0.513457
Armc2	6.69181	0.453791	3.91234	0.0479328	0.513457
3110002H16Rik	-2.01691	7.00822	3.91927	0.0477355	0.513457
Polr1a	1.93873	4.57548	3.91584	0.0478332	0.513457
Clk1	-1.64517	7.61478	3.91469	0.047866	0.513457
Gm6377	-3.84556	2.5112	3.92058	0.0476985	0.513457
Upf3b	-1.77029	4.44282	3.92368	0.0476105	0.513457
Mib2	2.97815	2.72629	3.92906	0.0474584	0.513457
Parva	-9.71852	1.26727	3.90958	0.0480116	0.513457
Hmgcs1	-2.11774	4.87113	3.92606	0.0475432	0.513457
Adtrp	-9.89477	0.887234	3.91024	0.0479928	0.513457
Cdc42ep2	2.50799	4.20813	3.91543	0.0478447	0.513457
Aatk	3.83194	1.15965	3.92709	0.0475142	0.513457
Gm10925	-2.30995	3.98407	3.90497	0.0481435	0.514011
Acadsb	-2.47159	4.88725	3.90444	0.0481587	0.514011
Asph	-2.56891	3.78889	3.901	0.0482575	0.514556
Zscan12	-3.69158	2.04489	3.8959	0.0484042	0.51561
Snrnp35	3.96082	1.97268	3.89322	0.0484815	0.515923
Cwc27	2.3628	3.7305	3.88911	0.0486001	0.516173
Zfp983	-3.53116	2.66766	3.88825	0.048625	0.516173
Mtx3	-3.30965	2.92602	3.88249	0.0487922	0.516173
Sertad3	-2.09551	3.7539	3.88557	0.0487027	0.516173
Fpr2	2.10753	7.03394	3.88538	0.0487082	0.516173
Prickle1	-7.08866	1.31475	3.88288	0.0487809	0.516173
Nup107	2.20218	4.68576	3.87645	0.0489679	0.517017
Tcrg.C4	5.15207	2.24226	3.87794	0.0489245	0.517017
H2.T23	1.6293	8.97144	3.86852	0.0491998	0.518957
Taok3	-2.6506	2.57471	3.85382	0.0496329	0.522638
Hmgn3	3.14567	2.99045	3.85338	0.0496457	0.522638
Fbxo30	-3.21089	6.28251	3.84461	0.0499062	0.523354
Klf3	-1.43761	6.52769	3.83732	0.0501235	0.523354
Gm16793	-4.51044	3.84982	3.8409	0.0500167	0.523354
Iqsec1	-1.79453	4.22097	3.8432	0.049948	0.523354
Mis12	2.11476	4.69469	3.83986	0.0500477	0.523354
Thg1l	2.37766	3.20251	3.84442	0.0499117	0.523354
Zbed4	-1.95176	4.67921	3.8391	0.0500704	0.523354
Kpna4	-1.28424	5.95103	3.83658	0.0501456	0.523354
Myo1f	1.67846	7.15882	3.83317	0.0502478	0.523354
C1galt1	-1.38477	6.18397	3.83399	0.0502232	0.523354
Gch1	-2.06805	4.71599	3.83571	0.0501719	0.523354
H2.Ob	-1.43865	8.13315	3.83114	0.0503088	0.523395
Caml	-1.90843	4.08442	3.8298	0.0503489	0.523395
Zswim8	2.52424	3.19751	3.82646	0.0504493	0.523934
Cyp3a11	-17.4841	3.67343	3.80918	0.0509725	0.52487
Clptm1	1.56598	5.07227	3.8171	0.0507319	0.52487
Tgtp2	1.80083	9.01547	3.81732	0.0507255	0.52487
Casp8	1.62332	7.12394	3.80741	0.0510263	0.52487
Tdpx.ps1	-5.33846	2.42159	3.81159	0.0508991	0.52487
Fcho2	-2.03271	5.26391	3.81212	0.050883	0.52487
Rbck1	1.43499	6.1152	3.82183	0.0505888	0.52487
Pdia4	1.51442	6.57054	3.81525	0.050788	0.52487
Ttc14	-1.62304	5.70189	3.80875	0.0509855	0.52487
AI606181	-3.11098	3.25161	3.80806	0.0510065	0.52487
Gm14005	2.53314	3.47964	3.80407	0.0511281	0.525416
Optn	-2.37242	6.22383	3.79437	0.0514253	0.52757
Med16	3.10994	2.33808	3.79326	0.0514592	0.52757
Snx13	-1.69613	4.59053	3.79244	0.0514846	0.52757
Sirpb1a	-2.14241	4.98549	3.78855	0.0516043	0.528295
Aimp1	1.57154	5.91174	3.78679	0.0516586	0.528348
ist	-1.60479	7.78141	3.77019	0.0521738	0.529008
Ptbp1	1.48071	6.60523	3.75716	0.0525817	0.529008
Stard5	-2.01137	3.87537	3.75332	0.0527027	0.529008
Jak3	3.84058	3.09379	3.74103	0.0530918	0.529008
Zfp963	-5.41918	1.0947	3.76068	0.0524713	0.529008
Ndufa3	-2.19368	7.73767	3.73889	0.0531598	0.529008
Cox6c	-2.4547	8.49082	3.77968	0.0518787	0.529008
k	-3.2574	3.60097	3.76779	0.0522487	0.529008
Tmem229b	1.16956	5.65346	3.75861	0.0525363	0.529008
Pdlim7	2.83298	3.65711	3.76922	0.0522039	0.529008
Ciapin1	2.15585	4.02647	3.78267	0.0517861	0.529008
Ckb	3.16805	3.25325	3.77683	0.0519671	0.529008
Vnn3	2.04043	4.58803	3.78026	0.0518605	0.529008
Tbcc	3.49828	2.68433	3.73777	0.0531952	0.529008
Gm16675	3.34287	2.47638	3.74031	0.0531145	0.529008
Ube2e3	-2.77965	6.86905	3.77112	0.0521447	0.529008
Pml	1.90821	5.33755	3.75124	0.0527684	0.529008
Mitd1	1.62975	5.19266	3.7541	0.052678	0.529008
Engase	3.96442	2.44517	3.75227	0.052736	0.529008
Luc7l3	-1.45333	6.61229	3.74931	0.0528294	0.529008
Rpl7l1	1.40236	6.02095	3.74194	0.0530627	0.529008
Lin28a	5.656	0.805278	3.75641	0.0526054	0.529008
Mrps35	1.70781	4.36139	3.75009	0.0528046	0.529008
Rad1	-2.16462	3.95322	3.74675	0.0529102	0.529008
Msl3l2	5.57756	0.978803	3.74846	0.0528563	0.529008
Uox	-15.8602	4.26394	3.77433	0.0520446	0.529008
Bgn	-10.033	1.02168	3.77039	0.0521673	0.529008
Gm41043	8.9341	1.21471	3.76364	0.0523784	0.529008
Mbtd1	-2.06743	4.5241	3.75794	0.0525571	0.529008
Fbxl4	-3.10216	3.33431	3.74255	0.0530436	0.529008
Fam173b	-2.70034	3.10225	3.73504	0.0532824	0.529386
Nans	1.85352	5.34947	3.72575	0.0535797	0.529567
Tmco4	2.21925	4.5064	3.72645	0.0535571	0.529567
Cd1d1	-1.69237	4.60803	3.72832	0.0534972	0.529567
Aprt	2.14504	5.17022	3.72526	0.0535953	0.529567
Gpr65	1.51663	5.11718	3.73174	0.0533877	0.529567
Stambp	-3.00775	2.6214	3.72639	0.0535589	0.529567
Tnks1bp1	3.15139	2.07183	3.70367	0.0542929	0.530421
Tmem55b	-1.92012	4.39527	3.70463	0.0542616	0.530421
Kbtbd8	-2.84741	2.54252	3.71018	0.0540815	0.530421
Cox7a2	-2.40193	8.64255	3.71822	0.0538218	0.530421
Gne	1.46269	4.08993	3.70344	0.0543005	0.530421
Ttc17	-1.57935	4.22391	3.70279	0.0543214	0.530421
Spaca9	7.24571	1.50734	3.71599	0.0538937	0.530421
Ighg3	4.9857	2.55786	3.71638	0.053881	0.530421
Impdh1	3.05393	2.4558	3.70955	0.0541021	0.530421
Ly6i	2.87447	5.96401	3.70448	0.0542667	0.530421
1500015A07Rik	-4.41342	1.89211	3.70437	0.0542702	0.530421
Pgrmc1	-2.00525	5.53678	3.71622	0.0538863	0.530421
Dhx8	-1.17192	5.54484	3.70954	0.0541023	0.530421
Gyg	1.45571	6.06991	3.69598	0.0545436	0.531147
Epb41l4b	-9.5312	1.09088	3.69889	0.0544486	0.531147
Trbv1	3.58834	2.74752	3.69634	0.0545321	0.531147
Mnt	3.83058	1.58892	3.69199	0.0546743	0.53194
Luzp1	3.48939	2.8154	3.6867	0.0548481	0.53315
Mmel1	5.95136	2.11252	3.68497	0.0549048	0.53322
Ap3s1	-1.9588	6.13254	3.68244	0.0549885	0.533551
Atp5s	-3.33897	2.3881	3.67644	0.0551865	0.533721
Ccdc167	3.10279	3.1432	3.67759	0.0551485	0.533721
Crip1	1.94029	8.39563	3.67453	0.05525	0.533721
Nsmce3	3.3736	2.82787	3.67442	0.0552535	0.533721
Szrd1	1.51964	5.13554	3.67752	0.0551507	0.533721
Pycard	2.12228	6.98303	3.66863	0.0554458	0.5351
Lyve1	-6.33522	2.25271	3.66543	0.0555523	0.535169
Nop58	1.43165	5.82204	3.66586	0.0555379	0.535169
Cd6	2.04646	5.02322	3.66087	0.0557045	0.536156
Adarb1	-4.75943	1.15784	3.64414	0.0562668	0.536949
Ccne2	5.70535	2.35064	3.65083	0.0560412	0.536949
1110034G24Rik	-1.64187	5.19262	3.63507	0.0565743	0.536949
Mccc2	-2.90906	2.76337	3.6527	0.0559784	0.536949
Zfp944	-2.55483	3.85212	3.63638	0.0565296	0.536949
Prnp	-3.27516	5.97875	3.64924	0.0560948	0.536949
Ficd	4.48092	1.62521	3.64122	0.0563657	0.536949
Foxd2os	4.69933	1.41397	3.65132	0.0560247	0.536949
Evl	1.35953	5.30687	3.63513	0.0565721	0.536949
Slx4ip	-2.47852	2.92634	3.63332	0.0566336	0.536949
Atp5j2	-1.73351	7.56633	3.63362	0.0566237	0.536949
Lamtor4	1.7161	5.12713	3.64813	0.0561321	0.536949
Sowaha	-5.28302	4.15092	3.65047	0.0560534	0.536949
2310039H08Rik	-2.99571	2.47765	3.64248	0.0563231	0.536949
Hmbox1	-4.37622	2.10799	3.63715	0.0565037	0.536949
Sugp2	2.04787	4.1839	3.63709	0.0565055	0.536949
Itpkb	1.27242	4.89671	3.644	0.0562714	0.536949
Serpinc1	-15.353	4.0944	3.6285	0.056798	0.537561
Zcchc4	-1.88975	3.62155	3.62896	0.0567822	0.537561
Alox5	1.72472	5.07342	3.6257	0.0568937	0.537995
Col4a3bp	-1.3799	5.47139	3.6143	0.0572849	0.538751
Cln6	4.74541	1.83499	3.61647	0.0572101	0.538751
Apobr	1.5825	5.88589	3.6163	0.0572158	0.538751
Tmem108	-3.0134	2.66209	3.6144	0.0572813	0.538751
mt.Rnr2	-2.93764	11.8806	3.61318	0.0573235	0.538751
Coprs	5.72459	1.04598	3.61534	0.0572489	0.538751
Shkbp1	2.35298	3.18268	3.61326	0.0573208	0.538751
Fundc2	-2.74181	8.93337	3.61167	0.0573754	0.538769
Gm9958	-4.93877	1.47241	3.59806	0.057847	0.539165
Chmp1a	1.50214	6.52274	3.59707	0.0578813	0.539165
Ctdnep1	1.54032	4.29337	3.59222	0.0580506	0.539165
Ninj1	1.95777	5.18496	3.59353	0.058005	0.539165
Slc12a6	-1.1555	6.52533	3.6029	0.057679	0.539165
Malt1	-1.30354	6.5455	3.59864	0.0578269	0.539165
Utp4	1.89504	4.71442	3.59432	0.0579773	0.539165
Ppip5k1	4.10516	2.51663	3.60349	0.0576585	0.539165
Apoc3	-14.7249	3.92841	3.59173	0.0580677	0.539165
Smim7	-1.39503	6.91524	3.59847	0.0578327	0.539165
Aldoc	-4.17068	2.37688	3.59592	0.0579214	0.539165
Parp4	2.89871	3.07849	3.59905	0.0578127	0.539165
Eml2	2.4618	3.01469	3.5942	0.0579814	0.539165
Bphl	-2.61396	3.23443	3.5799	0.0584827	0.53955
Wdr45	-1.88222	3.82766	3.56913	0.0588631	0.53955
Hmgn2	1.60323	6.50691	3.5681	0.0588998	0.53955
Lrrc61	2.40722	3.16484	3.57817	0.0585436	0.53955
Ppm1a	-1.3814	6.86131	3.57175	0.0587703	0.53955
Ppp1cb	-3.09267	11.1338	3.56978	0.0588402	0.53955
Rmi1	-2.18306	3.96459	3.58805	0.0581965	0.53955
Clic1	1.51948	8.40801	3.57072	0.0588069	0.53955
Cxxc1	1.74131	4.63882	3.57781	0.0585564	0.53955
Slc31a2	2.33859	4.98151	3.58213	0.0584042	0.53955
Ankrd13c	-1.70944	5.44038	3.56781	0.05891	0.53955
Ube2n	-1.46479	5.35505	3.579	0.0585142	0.53955
Slc23a2	3.11757	2.50713	3.56937	0.0588546	0.53955
Zzz3	-1.55071	5.36521	3.58187	0.0584133	0.53955
1110032A03Rik	-2.10428	5.66375	3.57959	0.0584935	0.53955
Rcbtb1	-1.41874	5.04517	3.57277	0.0587342	0.53955
Emilin1	3.21231	2.90515	3.56409	0.0590421	0.539842
Fermt3	1.98807	7.45639	3.5641	0.0590419	0.539842
Macf1	-1.32326	7.16289	3.5621	0.059113	0.540032
Nek7	-1.69399	7.08014	3.5602	0.0591805	0.540191
Tinagl1	-4.31687	3.56093	3.54855	0.0595977	0.540339
Pnisr	-1.47533	5.80527	3.55373	0.0594118	0.540339
Scarf1	3.63246	2.54018	3.54862	0.0595951	0.540339
Elk3	1.88629	4.00615	3.55304	0.0594363	0.540339
Camta1	-3.15654	2.11761	3.55587	0.0593352	0.540339
Kmo	-1.65456	5.72632	3.55015	0.05954	0.540339
Spag7	2.40283	4.04642	3.55663	0.0593081	0.540339
Brms1l	-2.85615	3.1537	3.55268	0.0594495	0.540339
Ints6l	-1.71922	5.37487	3.54394	0.0597632	0.541384
Klc1	1.6761	5.08338	3.53586	0.0600553	0.542319
H2.D1	1.86003	11.5845	3.538	0.0599778	0.542319
Mybpc3	4.23862	0.317539	3.53552	0.0600677	0.542319
Themis2	1.3335	6.97036	3.53844	0.059962	0.542319
Rrp7a	1.84625	5.23105	3.53361	0.0601367	0.542488
Osm	4.05181	2.93529	3.51962	0.0606464	0.543144
Prokr1	-3.86459	3.47739	3.51704	0.060741	0.543144
Tnpo1	-1.40365	6.79601	3.51383	0.0608585	0.543144
Samd8	-2.14441	3.59155	3.51413	0.0608474	0.543144
Atf2	-1.6949	5.19267	3.52579	0.060421	0.543144
Plekhm3	-2.45247	3.6201	3.52213	0.0605546	0.543144
Gm44250	-5.07888	2.02498	3.52142	0.0605806	0.543144
Kdm6a	-1.45603	5.91648	3.5149	0.0608194	0.543144
Gtf2f1	1.62383	5.47114	3.52588	0.0604176	0.543144
2500002B13Rik	-4.6504	7.67205	3.52641	0.0603983	0.543144
Selenbp1	-2.58499	5.95267	3.52356	0.0605023	0.543144
Def6	1.55133	5.44988	3.5123	0.0609148	0.543144
Stard10	-2.88528	4.45792	3.51335	0.0608764	0.543144
Stat3	1.27291	5.90802	3.51603	0.0607779	0.543144
Washc4	-1.3175	5.61559	3.51001	0.0609989	0.543445
Rbfa	1.7125	4.516	3.50322	0.0612495	0.544328
Nif3l1	1.7511	4.21843	3.50433	0.0612085	0.544328
Plec	2.03601	4.56245	3.50433	0.0612087	0.544328
Ogn	-9.55189	1.71034	3.50142	0.0613161	0.54434
Ikzf5	-2.0509	4.24421	3.50046	0.0613519	0.54434
Utp3	1.4518	5.16629	3.49694	0.0614823	0.545049
Mapkapk2	1.45415	7.63826	3.47475	0.062312	0.545084
B3galt4	3.2394	2.4463	3.48655	0.0618693	0.545084
Igfbp2	-14.883	2.46166	3.48513	0.0619225	0.545084
Paip2	-2.10149	9.82478	3.4907	0.0617145	0.545084
Gzmb	3.5195	8.87714	3.48271	0.0620132	0.545084
Dapl1	-2.19138	3.64346	3.47437	0.0623263	0.545084
Pde1b	2.72416	3.37109	3.48648	0.0618719	0.545084
Ndufs6	-1.70524	5.30098	3.47388	0.0623449	0.545084
Sfxn5	2.12702	4.361	3.48131	0.0620656	0.545084
Chst3	-1.59975	6.27705	3.47864	0.0621658	0.545084
Gas2l3	4.8646	0.996342	3.49083	0.0617096	0.545084
Apoc1	-16.04	6.07038	3.47745	0.0622104	0.545084
Ap1s1	1.97784	3.96578	3.49215	0.0616606	0.545084
Tab2	-1.68685	6.79722	3.48569	0.0619014	0.545084
Ptpn7	1.68746	5.73803	3.47385	0.0623459	0.545084
Bdp1	-1.81445	4.71512	3.48284	0.0620084	0.545084
Gpr174	-2.12879	4.97289	3.48943	0.0617617	0.545084
D430042O09Rik	3.85036	2.61087	3.46526	0.0626707	0.546489
Pbx3	3.42332	2.30449	3.46041	0.0628549	0.546489
Map3k15	2.14552	3.90197	3.46024	0.0628613	0.546489
Ciz1	2.79602	2.33026	3.46026	0.0628603	0.546489
Ttpal	-1.28099	6.30907	3.46484	0.0626865	0.546489
Prdx5	1.73632	7.98686	3.46123	0.0628235	0.546489
Det1	2.47578	3.31533	3.46023	0.0628615	0.546489
Bap1	1.39443	5.0005	3.456	0.0630226	0.546568
Gm20234	7.78214	0.122782	3.45698	0.0629854	0.546568
Abcd3	-2.70611	4.20662	3.45619	0.0630153	0.546568
Agtrap	1.56195	5.14567	3.44767	0.0633411	0.547568
Hdac9	2.55971	3.62585	3.44888	0.0632948	0.547568
Apc	-2.17653	4.32273	3.44791	0.0633318	0.547568
Cp	-5.89636	4.92607	3.44912	0.0632856	0.547568
Pcmtd2	-1.57041	5.47373	3.44035	0.0636223	0.549558
Chtf18	5.40069	0.9547	3.43774	0.0637228	0.549985
Suco	-1.52419	5.51787	3.43289	0.0639103	0.551163
Anxa8	6.40264	0.816598	3.42098	0.0643729	0.551184
mt.Co2	-3.55101	2.6445	3.42117	0.0643655	0.551184
Rmdn3	1.73177	4.30965	3.42258	0.0643105	0.551184
Tmem110	-2.80953	3.0412	3.42673	0.0641489	0.551184
Hat1	1.40468	5.40542	3.42455	0.0642339	0.551184
Spindoc	5.46667	0.789965	3.43008	0.064019	0.551184
Ccar2	2.25427	4.27881	3.42743	0.0641218	0.551184
Ndufa10	-1.50115	6.32304	3.4261	0.0641736	0.551184
Clcn4	-1.2853	5.74813	3.43144	0.0639664	0.551184
Frg1	-1.50546	6.78297	3.41899	0.0644504	0.551201
Gm28857	-7.23499	1.17507	3.4183	0.0644772	0.551201
Maged2	2.96457	5.37515	3.41415	0.0646397	0.552152
Ccdc6	1.47858	4.45314	3.40217	0.0651106	0.555295
Tmub1	3.17293	2.23537	3.40306	0.0650757	0.555295
Entpd1	1.61606	6.05721	3.39633	0.0653418	0.556826
Ctu2	3.04174	2.81466	3.39363	0.0654487	0.557296
E2f8	7.4099	0.61705	3.36232	0.0667039	0.558488
Ino80d	-1.76853	4.52008	3.38545	0.0657744	0.558488
Ecd	1.42987	5.2078	3.35916	0.066832	0.558488
Baz1b	1.21938	6.09416	3.38374	0.0658426	0.558488
Mterf3	-2.02778	4.58583	3.38649	0.0657328	0.558488
Nup85	1.97273	4.93538	3.37428	0.0662217	0.558488
Gnmt	-11.9182	3.57652	3.3601	0.066794	0.558488
Irf5	1.33785	6.42136	3.37245	0.0662949	0.558488
Mri1	2.00891	3.9246	3.37578	0.0661612	0.558488
Rsph10b	-4.95295	2.75258	3.3661	0.0665513	0.558488
Filip1l	-1.30315	6.6085	3.37181	0.066321	0.558488
Casp6	-1.71225	3.85124	3.37121	0.0663451	0.558488
Ms4a4c	1.82953	7.88843	3.37575	0.0661624	0.558488
Anxa6	1.78114	8.69408	3.37371	0.0662444	0.558488
1700047M11Rik	8.36822	1.72243	3.36705	0.0665129	0.558488
Npm3	1.36831	5.2928	3.37823	0.0660628	0.558488
Ophn1	-3.24558	2.06604	3.3602	0.06679	0.558488
Bank1	-1.5051	7.09623	3.38446	0.0658137	0.558488
Nek1	-3.46813	2.54803	3.36309	0.0666728	0.558488
Rtf2	1.23515	6.79133	3.36853	0.0664529	0.558488
Slc25a46	-1.47934	5.06597	3.36667	0.0665283	0.558488
Dlat	1.69946	4.18857	3.35981	0.0668058	0.558488
Wdr26	-2.54045	10.4955	3.3771	0.0661084	0.558488
Mrpl50	-1.83827	3.87002	3.37081	0.066361	0.558488
Stxbp2	1.47804	5.16176	3.3546	0.0670175	0.558739
Foxk2	-1.54785	4.44609	3.35577	0.0669699	0.558739
Plk3	4.57426	1.94196	3.35524	0.0669916	0.558739
Trbv12.1	3.15438	2.77983	3.35247	0.0671044	0.55903
Tbc1d13	1.62015	4.91641	3.35053	0.0671834	0.559256
Psmd7	1.65712	5.20362	3.34432	0.0674372	0.559538
Casc3	-1.61658	4.27229	3.34822	0.0672779	0.559538
Ctsg	6.41833	0.726442	3.34093	0.0675764	0.559538
Bst1	2.4402	5.92188	3.34655	0.067346	0.559538
Zbtb10	-4.70523	2.41258	3.34132	0.0675605	0.559538
Limk2	2.36777	4.49974	3.34081	0.0675813	0.559538
Prdm2	1.87152	3.81027	3.3383	0.0676844	0.559538
Fbxo21	3.24094	2.7588	3.33944	0.0676375	0.559538
Aldh1l1	-7.64854	4.05265	3.34005	0.0676125	0.559538
Rbmx	-2.08522	4.83048	3.33135	0.0679711	0.56131
Rab1b	1.78098	4.68972	3.33058	0.0680028	0.56131
Lpcat3	-1.43577	5.21913	3.32916	0.0680616	0.561365
Amdhd2	2.46848	3.68904	3.3262	0.0681842	0.561517
Kntc1	3.22596	2.90252	3.32636	0.0681777	0.561517
Ccdc181	3.59475	3.02108	3.3229	0.0683212	0.562216
2510039O18Rik	1.73079	4.88429	3.31811	0.0685204	0.563425
Selenop	-1.87701	8.40528	3.31586	0.0686145	0.563769
Gm37305	-2.8751	2.74304	3.30794	0.0689458	0.564769
Zranb3	3.68744	3.66531	3.30877	0.0689111	0.564769
Cd209a	5.20173	2.60836	3.31122	0.0688084	0.564769
Nedd4l	-3.32596	2.64306	3.30966	0.0688738	0.564769
Rab21	-1.39972	5.79094	3.28108	0.0700826	0.565051
1500009L16Rik	5.6593	2.09168	3.2693	0.0705879	0.565051
G530011O06Rik	4.13653	0.631253	3.25871	0.0710448	0.565051
Ces3a	-19.1996	3.97429	3.29732	0.0693931	0.565051
Csrp2	-4.06622	3.15411	3.27052	0.0705353	0.565051
Prpf38a	1.72175	5.27602	3.27997	0.0701301	0.565051
Mturn	-1.85252	4.12841	3.26974	0.0705687	0.565051
Rxrb	1.62785	4.73809	3.26707	0.0706837	0.565051
Sp100	1.3061	8.01192	3.26456	0.0707921	0.565051
Uqcrq	-2.31508	4.32381	3.25728	0.0711071	0.565051
Gcnt1	-1.7936	5.60805	3.28464	0.0699311	0.565051
Pip5k1b	-3.26533	4.67235	3.29405	0.0695314	0.565051
Acly	1.21151	7.34371	3.26457	0.0707918	0.565051
BC064078	-2.08226	3.73861	3.25735	0.0711038	0.565051
Zfp213	2.31243	2.94538	3.29132	0.0696468	0.565051
Emd	1.47588	4.79221	3.2927	0.0695886	0.565051
Kxd1	1.67788	5.50848	3.25676	0.0711293	0.565051
Alkbh5	-1.47922	5.98685	3.28492	0.069919	0.565051
Lipe	2.23522	3.5245	3.27202	0.070471	0.565051
Casp12	4.93241	1.9058	3.27244	0.0704526	0.565051
Atp10a	2.16403	4.46626	3.2874	0.0698134	0.565051
Art2b	3.06391	3.53072	3.26381	0.0708245	0.565051
Btaf1	-1.40024	5.76268	3.29938	0.069306	0.565051
Tlcd1	-5.24764	1.62057	3.26094	0.0709486	0.565051
Rars	1.34056	5.99099	3.26554	0.0707497	0.565051
Odf2l	4.34327	1.64949	3.2774	0.0702401	0.565051
Prss34	4.20155	2.81914	3.28786	0.0697939	0.565051
Nyx	-7.81495	1.21513	3.30306	0.069151	0.565051
Kdm3a	-1.33791	5.73783	3.29559	0.0694661	0.565051
Serpinb9	2.16941	6.57355	3.29246	0.0695986	0.565051
Gm33424	5.10153	0.762037	3.27396	0.0703876	0.565051
Btd	-2.89029	3.29559	3.27806	0.0702119	0.565051
Cox7c	-1.43124	7.14463	3.25678	0.0711287	0.565051
Zfp341	-4.56061	1.62925	3.27791	0.0702184	0.565051
Afap1l1	-3.57418	3.17535	3.28004	0.0701272	0.565051
Depdc5	1.81025	3.97166	3.27022	0.0705483	0.565051
Txndc12	1.53086	4.08526	3.27358	0.070404	0.565051
Wee1	-3.87624	2.17268	3.26059	0.0709637	0.565051
Fuca2	1.42899	5.38832	3.27646	0.0702803	0.565051
Mcemp1	2.03814	7.52766	3.28174	0.0700547	0.565051
Grhpr	-4.26747	2.28424	3.29303	0.0695744	0.565051
Mocos	2.67805	3.96594	3.23644	0.0720171	0.566505
Kpna2	1.7137	6.41249	3.24096	0.0718186	0.566505
Ypel4	-4.28852	3.48007	3.24724	0.0715438	0.566505
Rab12	-2.57424	3.48227	3.24434	0.0716704	0.566505
Lpin1	-1.78672	4.2399	3.23807	0.0719454	0.566505
Rundc3a	-6.44208	3.96008	3.23599	0.072037	0.566505
Gata3	4.12101	1.54447	3.24462	0.0716585	0.566505
Ppp1r8	1.339	5.14441	3.24902	0.071466	0.566505
Ankib1	-1.20313	5.09726	3.24514	0.0716354	0.566505
Csnk1g2	1.67465	5.72475	3.23573	0.0720481	0.566505
Snx18	1.57751	5.34616	3.24845	0.071491	0.566505
H3f3a.ps1	-2.89433	5.13343	3.24121	0.0718077	0.566505
Plekho2	2.1426	3.25763	3.23987	0.0718665	0.566505
Strbp	-1.73902	5.36872	3.23621	0.0720269	0.566505
Oxsm	2.69443	2.66877	3.23253	0.0721889	0.567198
Cox17	2.9724	2.97387	3.23122	0.0722471	0.567242
Adamts14	3.5313	3.35657	3.22731	0.0724197	0.567771
Hcfc1r1	-2.11492	4.00661	3.22807	0.0723861	0.567771
Ambra1	1.7807	4.28055	3.22153	0.0726758	0.568339
1110059G10Rik	-2.02544	3.84738	3.22221	0.0726456	0.568339
Arl8b	1.38372	5.93805	3.22091	0.0727031	0.568339
Lsm6	-1.39564	5.49452	3.22295	0.0726128	0.568339
Aasdhppt	-1.5104	4.12769	3.21145	0.0731246	0.5695
Mars	1.41183	5.03208	3.21391	0.073015	0.5695
Ddx24	1.20329	6.50231	3.20339	0.0734856	0.5695
Lrig2	-2.33822	3.88395	3.20564	0.0733846	0.5695
Inpp5f	-1.45401	4.7993	3.20478	0.0734235	0.5695
Metrn	3.67127	2.09733	3.2122	0.0730911	0.5695
Neurl1b	4.37575	1.02647	3.20355	0.0734785	0.5695
Gbe1	-1.83221	4.19691	3.21141	0.0731264	0.5695
Hdac5	1.61687	4.32568	3.2089	0.0732386	0.5695
Stard8	3.37363	2.44124	3.20397	0.0734595	0.5695
Avl9	-1.29611	5.15178	3.20796	0.073281	0.5695
Rfc5	2.4495	4.63211	3.21422	0.073001	0.5695
Dgat2	-3.45743	3.29376	3.20131	0.0735794	0.569817
Klhl14	-5.43318	1.46327	3.19852	0.0737047	0.570378
Tyk2	1.42309	5.6699	3.19362	0.0739262	0.571681
Pgk1	1.29172	7.73406	3.18702	0.0742251	0.571942
Aoah	2.63146	3.74564	3.18797	0.0741822	0.571942
Zfp942	-1.78687	4.30557	3.18853	0.0741568	0.571942
Fpgt	-2.25712	3.67912	3.19017	0.0740824	0.571942
Mov10	2.86501	3.21457	3.19042	0.0740711	0.571942
Pigh	2.02849	3.73748	3.18573	0.0742839	0.571986
Stat1	1.41908	7.59001	3.1823	0.0744397	0.572777
Ubac1	-2.6559	8.30858	3.18024	0.0745338	0.573091
Mad2l1bp	1.60627	4.70372	3.17766	0.0746515	0.573588
Tmem128	1.20186	5.45033	3.17521	0.0747635	0.574001
Exo1	5.49551	2.21426	3.173	0.074865	0.574001
Klra10	5.24189	1.0791	3.17345	0.0748444	0.574001
Ypel5	-2.36192	8.83372	3.1573	0.0755883	0.574501
Dcun1d1	-2.44964	7.55997	3.16441	0.0752597	0.574501
Ssh1	-2.47858	3.24026	3.16414	0.0752722	0.574501
Rdh7	-15.3363	4.03018	3.1688	0.0750576	0.574501
Ift52	1.61265	3.84614	3.1558	0.0756577	0.574501
Hemgn	-4.1327	5.87449	3.16732	0.0751255	0.574501
Sh3glb1	-2.80304	11.8393	3.16353	0.0753003	0.574501
Mindy2	-1.22727	5.23837	3.15844	0.0755355	0.574501
Hrh2	2.32661	3.46028	3.15539	0.0756764	0.574501
Kdelc1	5.1841	1.51026	3.162	0.0753709	0.574501
Kif11	3.97945	5.43258	3.16718	0.0751321	0.574501
Neurl4	1.91594	4.36347	3.16311	0.0753195	0.574501
Rnf145	-1.19821	6.35453	3.15816	0.0755481	0.574501
Ddx54	1.89634	4.87011	3.15887	0.0755153	0.574501
Pdia3	1.20812	7.70077	3.14945	0.0759525	0.575803
Prdx1	-1.48475	8.42684	3.14523	0.0761493	0.575803
Cd63	-3.00929	2.96301	3.14709	0.0760623	0.575803
Atxn1l	2.13722	3.83225	3.14871	0.0759869	0.575803
Hipk2	-2.9304	3.44081	3.14755	0.0760411	0.575803
Bhmt	-16.4073	4.99464	3.14482	0.0761684	0.575803
Zscan20	3.06348	2.61736	3.14202	0.0762993	0.57583
Gm10522	-6.06683	1.02759	3.14181	0.076309	0.57583
Kri1	1.40188	5.17839	3.14018	0.0763856	0.57583
Tarbp1	-3.0587	2.61779	3.1412	0.0763377	0.57583
Nxt2	3.00986	2.81317	3.13599	0.076582	0.576907
Tmem14c	1.43838	6.13762	3.13318	0.0767139	0.577073
Tagln2	1.36187	7.80894	3.1321	0.0767646	0.577073
Nhp2	1.88	4.76442	3.13278	0.0767329	0.577073
Kyat3	-5.84201	2.55004	3.13049	0.0768405	0.57724
Dctn3	1.46127	5.08774	3.12868	0.0769261	0.577481
Tmed9	1.40944	5.78878	3.12152	0.0772647	0.57962
Stoml2	-1.45182	5.2348	3.11999	0.0773374	0.579762
Vgll4	1.63529	3.79145	3.11883	0.0773924	0.579771
Ppp1r9b	1.97809	4.12996	3.11568	0.077542	0.580085
Atg14	-2.53814	3.11395	3.11633	0.0775113	0.580085
Selenoo	-1.51702	4.79062	3.11328	0.0776563	0.580538
Taf12	1.43644	4.75228	3.1073	0.0779421	0.58227
Dusp19	5.18801	1.6828	3.1038	0.0781097	0.582714
Vps16	1.26698	5.81747	3.10477	0.0780631	0.582714
Tecr	-2.25714	3.39449	3.10085	0.0782513	0.582964
Me2	1.21251	6.15336	3.10155	0.0782176	0.582964
Pyurf	-3.19187	2.84099	3.09154	0.0787002	0.584969
Gm37387	-4.89937	2.28459	3.09398	0.0785822	0.584969
Rhog	1.28572	5.17816	3.08965	0.0787917	0.584969
Ptma	1.19339	8.52058	3.08998	0.0787758	0.584969
Cyba	1.71172	7.83423	3.09045	0.0787532	0.584969
Lpcat4	-6.02502	1.03423	3.0884	0.0788521	0.585014
Aida	1.07908	6.50275	3.08578	0.0789793	0.585555
Abhd4	-1.99686	6.65314	3.08171	0.0791774	0.585815
Ptges2	2.32709	3.04588	3.08177	0.0791744	0.585815
Psmd14	1.2764	6.55218	3.08364	0.0790836	0.585815
Hfe	-2.11797	5.49489	3.08014	0.0792537	0.585909
Rfxap	2.47156	3.23471	3.07921	0.0792988	0.585909
Usp15	-2.62552	10.6039	3.07155	0.0796736	0.588113
Tmed8	-1.4817	5.23759	3.06755	0.0798699	0.588113
Rgl2	1.92646	4.82965	3.07018	0.0797405	0.588113
Gda	-2.64856	12.3064	3.06785	0.0798551	0.588113
Arl2bp	-1.51185	6.54412	3.06765	0.0798647	0.588113
Cdc20	5.58391	3.57344	3.06579	0.0799561	0.588346
Hsp90ab1	1.37317	7.84283	3.06221	0.0801325	0.589242
Ndufaf6	3.60801	1.75213	3.05515	0.0804817	0.591406
Tomm7	-1.26148	6.07008	3.04573	0.0809498	0.591483
Zfp605	5.14004	2.14867	3.04138	0.0811667	0.591483
Tmem101	2.43663	2.57125	3.04643	0.0809149	0.591483
Met	3.44653	3.15523	3.04061	0.0812055	0.591483
Cmah	-1.30001	6.56875	3.04093	0.0811895	0.591483
Slc25a37	-3.49354	9.27889	3.04979	0.0807477	0.591483
Med13	-1.63942	5.98643	3.04856	0.0808088	0.591483
G0s2	3.30482	2.05146	3.0423	0.0811208	0.591483
Rpl18	1.46506	9.18954	3.05209	0.0806334	0.591483
Sema4a	1.8918	5.02478	3.04488	0.0809919	0.591483
S100a16	-8.19924	1.44994	3.04379	0.0810463	0.591483
Grcc10	-3.69341	1.67706	3.05373	0.0805519	0.591483
Nfyb	-1.39145	4.98914	3.04125	0.0811736	0.591483
H2.K1	1.62652	11.2775	3.0331	0.081582	0.591575
Slc25a45	1.22689	5.89164	3.03129	0.0816729	0.591575
2410089E03Rik	-3.90162	1.41136	3.02447	0.0820173	0.591575
Klhl28	-1.91443	4.12864	3.03459	0.0815072	0.591575
Jdp2	3.95369	2.39873	3.03663	0.0814046	0.591575
Med21	-1.65988	4.88278	3.02428	0.0820265	0.591575
Ranbp6	-1.94922	4.35217	3.03604	0.0814344	0.591575
Tmem242	1.44883	4.51408	3.01318	0.08259	0.591575
Tbc1d31	2.17948	3.31973	3.01731	0.08238	0.591575
Mcm7	1.81717	5.94905	3.03089	0.0816933	0.591575
Opa3	1.66759	4.15169	3.01404	0.0825464	0.591575
Coro1a	1.57113	9.32531	3.02225	0.0821297	0.591575
Ppox	-1.85595	4.88618	3.02028	0.0822294	0.591575
Exoc7	1.70452	4.69799	3.02011	0.0822377	0.591575
Iqgap2	1.43469	5.74555	3.03481	0.0814959	0.591575
Kdm7a	-1.83446	7.32699	3.01591	0.0824511	0.591575
Pkn2	-2.39649	8.25034	3.02789	0.0818444	0.591575
9330160F10Rik	-4.25033	1.73715	3.03021	0.0817273	0.591575
Ggt5	2.79916	3.68837	3.02079	0.0822035	0.591575
Mrpl23	1.67341	4.26337	3.01712	0.0823897	0.591575
Abr	1.80434	4.4337	3.0292	0.0817784	0.591575
4931406C07Rik	-4.23367	2.48226	3.02305	0.0820887	0.591575
Slc25a11	1.12356	6.38315	3.01737	0.0823768	0.591575
Rab30	-2.36201	3.91187	3.02125	0.0821799	0.591575
Tm4sf1	-3.81244	2.26428	3.01532	0.082481	0.591575
Btbd9	1.68516	4.37661	3.0093	0.0827879	0.592599
H2.Q4	1.28052	7.85085	2.99242	0.083655	0.594962
Lacc1	4.75108	0.966714	2.98807	0.0838803	0.594962
Casd1	-1.73428	4.73682	2.993	0.083625	0.594962
Kyat1	-3.60209	2.30677	2.98288	0.0841494	0.594962
Nup37	2.19389	3.42894	2.98942	0.0838104	0.594962
Gpld1	-7.42509	1.31756	2.99266	0.0836427	0.594962
Vrk2	-1.48773	4.89736	2.99749	0.0833937	0.594962
Tbc1d15	-1.33788	5.2181	2.99464	0.0835402	0.594962
Rdh13	2.34156	2.71601	2.98437	0.0840718	0.594962
Dynlt3	-1.60981	6.29146	2.98334	0.0841253	0.594962
Atp1a1	1.21384	7.98405	2.98924	0.0838198	0.594962
Armcx6	3.39267	1.90417	2.98759	0.0839047	0.594962
Zfp318	-1.45776	5.39955	2.99251	0.0836503	0.594962
Pmp22	-4.65869	3.31815	2.98255	0.0841667	0.594962
Slc38a9	-1.40551	4.90454	2.99187	0.0836836	0.594962
Cnpy4	2.22825	3.77075	2.99481	0.0835318	0.594962
Rrm2b	-1.91583	4.4619	2.99936	0.0832975	0.594962
Tmem185b	-1.72311	3.75	2.99331	0.0836092	0.594962
Rassf7	-3.4897	2.01092	2.98641	0.083966	0.594962
Susd1	-1.77551	5.06627	2.97899	0.0843517	0.595231
Frmd4b	1.97763	4.581	2.97863	0.0843705	0.595231
Mpc2	-2.40551	8.39823	2.98008	0.084295	0.595231
Serping1	-8.73897	4.40868	2.97707	0.0844521	0.595418
Ssfa2	2.00908	3.01235	2.97505	0.0845574	0.595469
Ms4a6c	1.46758	7.39089	2.97424	0.0846001	0.595469
Rpl39	-1.62603	10.568	2.97376	0.0846251	0.595469
Prr14l	2.01563	3.76687	2.96942	0.0848523	0.596289
Rnf19b	1.6092	5.68561	2.96956	0.0848448	0.596289
Gm4045	-3.37298	3.05295	2.96435	0.0851187	0.596884
Prelid1	1.45635	7.10876	2.96547	0.0850595	0.596884
Cd2bp2	1.34748	5.94692	2.96547	0.0850595	0.596884
Metap2	-1.86925	8.7208	2.9636	0.0851584	0.596884
Cdca8	2.94169	3.47997	2.95343	0.0856954	0.596951
Fnip1	-1.57148	4.69594	2.95536	0.0855934	0.596951
Pabpc1	-2.41296	12.0553	2.95668	0.0855235	0.596951
Cars	1.98232	4.32934	2.95622	0.0855476	0.596951
Nfya	-2.94417	2.985	2.96171	0.0852577	0.596951
Hc	-14.5496	3.68092	2.95424	0.0856525	0.596951
Fbxo18	1.40286	5.63366	2.95741	0.0854848	0.596951
Hsdl1	1.32474	5.2453	2.95227	0.0857572	0.596951
Ighv1.52	-3.96735	1.17474	2.95941	0.0853789	0.596951
Vps18	3.16989	2.5565	2.95189	0.085777	0.596951
Dlg3	-5.49739	1.45551	2.95201	0.0857706	0.596951
Slc7a5	-3.39988	5.2492	2.94936	0.0859117	0.597414
Fbxo25	1.913	3.64965	2.94855	0.0859544	0.597414
Rps6kb1	-1.28474	5.56716	2.94624	0.0860776	0.597813
Pld4	1.20393	7.1635	2.94539	0.0861227	0.597813
Rbm18	-1.47239	4.94413	2.94413	0.0861898	0.597894
Fnbp1l	-7.2165	0.897097	2.94086	0.0863648	0.598722
Bet1l	-1.34708	4.60672	2.93888	0.0864708	0.598914
Cndp2	1.45305	6.30394	2.93826	0.0865036	0.598914
B230219D22Rik	-1.33506	5.32729	2.93486	0.0866863	0.599121
Ttk	6.38944	2.12021	2.9346	0.0867002	0.599121
Polr1c	1.50904	5.13053	2.93588	0.0866314	0.599121
1700020I14Rik	-2.13331	9.9961	2.93048	0.0869215	0.600265
H2.T10	1.84325	5.14403	2.92826	0.0870413	0.600669
Tmem135	-1.5956	4.03115	2.92566	0.0871816	0.600669
E2f1	4.84815	1.42371	2.92451	0.0872438	0.600669
9230112E08Rik	4.14807	1.9179	2.92423	0.0872587	0.600669
Hmgcr	-1.37469	5.18961	2.92438	0.087251	0.600669
Klhl2	-1.96486	4.44356	2.92104	0.0874318	0.60071
Cdc20b	5.47077	0.715163	2.92252	0.0873515	0.60071
Rab23	3.76885	1.09409	2.92149	0.0874073	0.60071
Gabarapl2	-2.87106	11.5488	2.91129	0.0879614	0.601665
Zc3h6	-3.93008	1.66884	2.91367	0.0878316	0.601665
Rsf1	-1.59298	4.52281	2.912	0.087923	0.601665
B3galt6	3.38324	2.1136	2.91215	0.0879147	0.601665
Rsbn1l	-1.77005	4.86636	2.91288	0.0878751	0.601665
Gt.ROSA.26Sor	-2.18036	3.683	2.91219	0.0879123	0.601665
Plekha5	2.86095	2.81466	2.91262	0.0878891	0.601665
BC055324	4.93722	2.11021	2.90867	0.0881042	0.601793
S100a13	-1.40451	6.81467	2.90608	0.088246	0.601793
Nrp1	-2.5848	3.86697	2.90676	0.0882089	0.601793
Hibadh	-1.58602	5.82109	2.90566	0.088269	0.601793
Ngdn	1.25042	5.63786	2.9038	0.0883709	0.601793
Tom1	2.68101	2.41612	2.90709	0.088191	0.601793
Cct2	1.13191	8.07151	2.90387	0.088367	0.601793
Faap24	4.11763	1.5307	2.9012	0.0885134	0.602383
Man1c1	3.42183	2.45279	2.89949	0.0886075	0.602643
Kmt2e	-1.53569	4.47458	2.89782	0.0886993	0.602887
Usmg5	-1.62406	7.18552	2.89149	0.0890484	0.604033
Cd68	1.48698	5.24851	2.89093	0.0890795	0.604033
Cst7	2.03113	5.14262	2.89359	0.0889325	0.604033
Rabl6	2.42608	3.23938	2.8907	0.0890921	0.604033
Plcb3	-2.18243	2.79934	2.88815	0.0892332	0.604404
Trdc	4.30628	2.41188	2.88769	0.0892589	0.604404
Serp2	4.57435	1.30021	2.88318	0.0895092	0.60449
Syngr2	1.47577	5.56704	2.88404	0.0894611	0.60449
Trit1	-1.72706	3.75441	2.88359	0.0894866	0.60449
Ncl	1.21191	6.88641	2.88326	0.0895049	0.60449
2210406H18Rik	4.62214	2.2249	2.88241	0.0895521	0.60449
Card19	1.89339	4.24804	2.88074	0.0896447	0.604737
Cdipt	1.36129	5.31692	2.87885	0.0897499	0.604991
Crebzf	-1.5646	5.33707	2.87805	0.0897946	0.604991
Ifit1	1.87356	8.90084	2.87543	0.0899411	0.605047
Vim	1.47418	9.2326	2.87489	0.0899713	0.605047
Ccnl1	-1.32297	6.18201	2.87617	0.0898996	0.605047
Bend5	-2.48479	2.94981	2.87363	0.0900413	0.605141
Reps1	2.11016	3.51817	2.87227	0.0901179	0.605278
Cdc42ep3	-1.60965	4.6458	2.86708	0.0904086	0.606852
Hist2h2be	-3.36472	2.78071	2.86416	0.0905729	0.607361
Atp5k	-1.87701	7.51707	2.86373	0.0905971	0.607361
Mob1b	-1.87065	4.44488	2.84632	0.0915836	0.607587
Ost4	-2.00011	8.52978	2.85596	0.0910358	0.607587
Uba7	1.37976	6.89025	2.84605	0.0915985	0.607587
Copa	1.0759	7.44856	2.85008	0.0913693	0.607587
Rlf	-1.03169	5.80531	2.84817	0.0914779	0.607587
Thbs3	-6.04722	1.34873	2.85712	0.0909705	0.607587
Pole2	2.98468	2.82193	2.84911	0.0914244	0.607587
Tspyl1	-1.55558	6.93169	2.848	0.0914876	0.607587
D17H6S53E	2.80543	3.73208	2.84523	0.0916454	0.607587
Thyn1	2.37031	3.7739	2.85263	0.0912245	0.607587
Azin1	-2.3755	9.52737	2.84595	0.0916042	0.607587
Lrrc8b	-1.77354	4.14382	2.84795	0.0914906	0.607587
Ipp	3.73449	2.25711	2.85459	0.0911137	0.607587
Ttf2	3.63978	3.14107	2.8619	0.0907001	0.607587
Plpp2	3.07733	1.83577	2.85997	0.0908094	0.607587
Derl2	-1.3556	4.96903	2.85294	0.0912072	0.607587
Rnf217	-3.94644	1.76556	2.85465	0.0911099	0.607587
Gpr160	3.97876	2.5075	2.84821	0.091476	0.607587
Card11	2.25528	3.785	2.84001	0.0919435	0.608254
Cramp1l	-2.45148	2.79314	2.84143	0.0918625	0.608254
E2f3	-2.93428	2.5839	2.8423	0.0918128	0.608254
Slc9a3r2	5.13889	2.27021	2.83952	0.0919716	0.608254
1700037H04Rik	-2.80086	3.54861	2.83808	0.0920539	0.608424
Rps6ka1	1.29106	6.4073	2.83612	0.0921666	0.608424
Fam53a	1.57309	4.24277	2.8363	0.0921559	0.608424
Zfp691	2.96614	1.89363	2.8344	0.0922653	0.608433
Sdc3	1.98712	5.19574	2.83413	0.0922809	0.608433
Tspan3	2.34988	4.34679	2.82831	0.0926157	0.609522
Gpcpd1	-1.71352	8.29641	2.82928	0.0925599	0.609522
Ralb	1.75717	4.81136	2.82949	0.092548	0.609522
Hyal2	-4.4708	1.35336	2.82348	0.0928945	0.609868
Pigw	4.89347	1.14058	2.82429	0.0928479	0.609868
Kptn	1.80231	3.44212	2.82364	0.0928856	0.609868
Zc3hc1	1.52878	4.36238	2.82451	0.0928354	0.609868
Slc25a15	-2.82106	3.48996	2.82032	0.0930777	0.610699
Id1	-4.04385	1.24459	2.81914	0.0931461	0.610776
Pcsk7	1.83286	5.20826	2.81699	0.093271	0.611223
Mars2	-3.4552	3.58159	2.81465	0.0934071	0.611371
Ralgps2	-1.36557	6.48938	2.8148	0.0933986	0.611371
Gm28151	-3.34114	1.90321	2.79627	0.0944836	0.611467
Cactin	1.92084	3.74963	2.81063	0.0936418	0.611467
A930009A15Rik	4.08946	0.767485	2.80856	0.0937624	0.611467
5730480H06Rik	-2.91446	2.47126	2.80773	0.0938113	0.611467
Ikbkg	-1.37209	6.51747	2.79712	0.0944335	0.611467
Carnmt1	2.27509	3.37496	2.79567	0.094519	0.611467
Mapk9	1.23191	5.29027	2.79635	0.0944793	0.611467
Errfi1	-3.75532	3.08882	2.79553	0.0945273	0.611467
2610021A01Rik	-2.27944	3.13543	2.80709	0.0938482	0.611467
Sec62	-1.52936	7.48375	2.79867	0.0943428	0.611467
Ywhae	2.13067	2.68518	2.79806	0.0943783	0.611467
Dapk2	-2.60535	6.0005	2.80101	0.0942052	0.611467
1810032O08Rik	4.32098	1.5315	2.79541	0.0945349	0.611467
Zc3h18	1.54803	4.0615	2.8109	0.093626	0.611467
Prmt6	-1.85769	3.71654	2.81064	0.0936411	0.611467
Ttc1	1.36762	5.0318	2.79505	0.0945561	0.611467
Fbxo8	-1.35494	4.71699	2.80551	0.0939411	0.611467
Pex11b	2.52213	3.02062	2.79649	0.0944708	0.611467
Zer1	2.24426	3.09002	2.79659	0.0944652	0.611467
Dnajc17	2.12905	2.96796	2.80046	0.0942373	0.611467
Mylk3	-3.3634	5.27277	2.79272	0.0946934	0.611621
Ap1g1	1.16508	5.2267	2.79281	0.0946882	0.611621
Arpp19	-1.04496	5.69081	2.78851	0.0949425	0.612862
1810026B05Rik	-1.27559	5.42511	2.78736	0.0950105	0.612934
Eif5	-2.61336	11.2171	2.78342	0.0952447	0.612978
Rabgap1l	-1.23283	7.15238	2.78463	0.0951724	0.612978
Kiz	-2.24485	3.94766	2.78407	0.0952061	0.612978
Fgfr1op2	-2.18878	9.5297	2.78397	0.0952122	0.612978
Pbdc1	1.21634	4.97451	2.78129	0.0953715	0.613428
Iglc2	-1.39896	6.89217	2.77924	0.0954933	0.613845
Nom1	1.28546	4.6401	2.77154	0.095954	0.615705
Tlr6	1.38993	4.73638	2.77221	0.0959138	0.615705
Ythdc1	-1.59595	4.69229	2.77211	0.0959199	0.615705
Prpf19	1.2867	6.30909	2.76957	0.0960717	0.616093
Klhl36	3.8532	1.86968	2.7686	0.0961305	0.616104
Narf	-1.88236	6.24642	2.76658	0.0962514	0.616117
Dcaf10	-1.58804	5.1916	2.76319	0.0964559	0.616117
Atp6v1a	1.04885	6.13234	2.76586	0.0962951	0.616117
Abca13	5.99232	1.22377	2.76483	0.0963566	0.616117
Tradd	2.25398	3.78938	2.76238	0.0965044	0.616117
Stx18	1.42432	4.02826	2.76386	0.0964152	0.616117
Stat4	1.61135	5.34166	2.76191	0.0965327	0.616117
Med7	-1.88564	3.9606	2.75953	0.0966765	0.61667
Mkks	3.28659	2.37437	2.75128	0.0971763	0.616672
Cul4a	-2.57457	8.28527	2.75046	0.0972263	0.616672
Pik3r6	2.01232	3.91298	2.75177	0.0971467	0.616672
1500011B03Rik	-2.08898	3.882	2.75101	0.0971929	0.616672
Lins1	2.08419	2.84385	2.75671	0.0968475	0.616672
Yaf2	-1.80483	4.72967	2.75456	0.0969773	0.616672
Mrpl34	2.18435	2.88977	2.75009	0.0972488	0.616672
Cfap43	1.4395	4.96606	2.75072	0.0972104	0.616672
Rarres2	-9.38623	4.16308	2.75632	0.096871	0.616672
Fam129b	2.64503	3.63579	2.75346	0.0970441	0.616672
Pum2	-1.1703	7.11939	2.74894	0.0973189	0.616753
Rbbp5	1.71571	4.676	2.74609	0.0974928	0.617493
Crlf3	-1.10625	7.38306	2.74481	0.0975707	0.617623
Dlgap4	1.80048	4.07135	2.74167	0.0977627	0.618112
Blmh	1.28289	5.86431	2.74255	0.0977088	0.618112
Htatip2	-1.9533	6.32762	2.73875	0.0979412	0.618755
Dnajc19	-1.58042	4.36128	2.73633	0.0980897	0.618755
Glmn	-2.31696	3.31343	2.73703	0.0980468	0.618755
Zbtb44	-2.17648	6.83382	2.73626	0.0980939	0.618755
Gpr183	-1.25888	5.75547	2.73454	0.0981995	0.619059
Ep300	-1.72318	4.10432	2.73269	0.0983135	0.619415
Sh3tc1	2.29822	3.55728	2.73163	0.0983791	0.619467
Klhdc10	-1.45484	4.1871	2.72484	0.0987981	0.619571
Jtb	-1.13833	5.12844	2.72826	0.0985864	0.619571
Vnn1	-13.1099	1.43958	2.72601	0.0987254	0.619571
Traf4	2.97512	2.81733	2.72561	0.0987503	0.619571
Parp11	1.49752	5.08795	2.7251	0.0987816	0.619571
Btbd11	-4.24702	2.13934	2.7253	0.0987693	0.619571
Acad10	-4.44162	1.39017	2.72813	0.0985946	0.619571
Cand1	1.12274	5.98647	2.7184	0.0991975	0.620086
Metrnl	1.60825	4.86113	2.7164	0.0993217	0.620086
Ank	-1.80278	5.15725	2.71904	0.0991574	0.620086
Fcgr3	1.36285	8.08658	2.71773	0.0992388	0.620086
Ube2g2	1.6155	4.88763	2.71699	0.0992854	0.620086
Dennd4b	2.36281	3.47333	2.71608	0.0993416	0.620086
Gm43197	-2.99859	3.51114	2.72009	0.0990927	0.620086
Cdk9	1.25294	5.35793	2.71518	0.0993979	0.620086
Ppa1	1.40517	5.20218	2.71926	0.0991437	0.620086
Mef2c	-1.48548	6.36717	2.70731	0.0998894	0.620281
Nprl3	1.53707	5.02091	2.71149	0.0996278	0.620281
Tstd3	-1.63517	4.62036	2.70902	0.0997825	0.620281
Ell2	-2.52068	6.22831	2.71257	0.0995603	0.620281
Cdca3	1.9774	4.91397	2.71251	0.0995644	0.620281
Osbpl7	5.30942	1.28019	2.7092	0.0997713	0.620281
Gm7536	-1.76414	3.67721	2.70797	0.099848	0.620281
Rmnd5a	-2.38965	8.49275	2.70803	0.0998439	0.620281
Stmn1	2.45526	5.58059	2.70528	0.100017	0.620713
Tmem199	2.00799	3.76985	2.70165	0.100245	0.621413
Gstm5	-3.48781	8.02547	2.70255	0.100188	0.621413
Sec23a	-2.09543	6.30015	2.6995	0.10038	0.621455
Nop53	1.1701	7.64693	2.69943	0.100384	0.621455
Ephx1	-1.23074	5.1509	2.69879	0.100424	0.621455
Gdpgp1	2.56319	2.45005	2.69548	0.100633	0.622389
Nmb	3.7866	1.58434	2.68804	0.101104	0.624074
Got2	-1.52948	5.43743	2.69002	0.100978	0.624074
Kcnj8	-4.19145	2.49925	2.68752	0.101137	0.624074
Ctsd	1.45091	7.7344	2.6876	0.101132	0.624074
Cmpk1	1.06027	6.27902	2.68612	0.101226	0.624264
Phf8	-1.81043	5.16865	2.68302	0.101423	0.624435
Fam129a	1.28016	5.54104	2.68305	0.101421	0.624435
Pgam5	1.52479	4.69392	2.68296	0.101427	0.624435
Phf11d	3.28083	4.96227	2.68187	0.101497	0.624506
Mt2	-5.20721	0.193969	2.68002	0.101615	0.624876
Gm8091	4.54685	0.90805	2.6741	0.101993	0.626351
Riox1	1.81724	3.97249	2.67291	0.102069	0.626351
Mysm1	-1.63632	4.57125	2.67263	0.102087	0.626351
Fastkd3	3.18339	2.37871	2.67385	0.102009	0.626351
Lrmp	1.18515	6.80938	2.67145	0.102163	0.626461
Hsf2	-3.02446	2.97758	2.66993	0.102261	0.626703
Trmt6	1.79958	4.39619	2.66666	0.102471	0.626878
1300017J02Rik	-4.57577	6.49266	2.66239	0.102746	0.626878
Helz2	1.9106	5.71535	2.66689	0.102456	0.626878
Clcn3	-1.80528	6.62105	2.66459	0.102604	0.626878
Fdxr	2.33015	3.17293	2.66226	0.102755	0.626878
Nutf2	2.46065	2.93819	2.66433	0.102621	0.626878
Snx7	4.43674	0.894369	2.66273	0.102724	0.626878
Adrm1	2.01741	3.26014	2.6646	0.102603	0.626878
Naa30	-1.54544	4.82526	2.66048	0.10287	0.627225
Med8	1.3454	5.46925	2.65608	0.103154	0.627334
Dcaf12	-2.76327	10.7801	2.65465	0.103247	0.627334
Carm1	-2.46605	2.77139	2.6561	0.103153	0.627334
Sla2	2.30806	3.98874	2.65821	0.103016	0.627334
Fmo1	-10.902	1.76533	2.65336	0.103331	0.627334
St6galnac6	2.4282	2.76998	2.65533	0.103203	0.627334
Pgs1	1.30292	5.52749	2.65303	0.103353	0.627334
Slc39a13	2.44794	2.41429	2.65375	0.103306	0.627334
Otub2	-1.90708	4.40772	2.6507	0.103504	0.627546
5430403G16Rik	-3.44848	2.29168	2.65106	0.103481	0.627546
Pex7	-1.43514	4.26343	2.64852	0.103646	0.627608
Dhdds	2.69271	3.38279	2.64786	0.103689	0.627608
Itpr3	1.30908	4.43993	2.64844	0.103651	0.627608
0610009L18Rik	4.99667	1.23856	2.64261	0.104032	0.629162
Asna1	1.24784	5.89703	2.64126	0.104121	0.629162
Gm10226	-4.83479	1.79384	2.64208	0.104067	0.629162
Fam159b	-3.66461	3.55271	2.63736	0.104377	0.630152
Degs1	-1.04483	6.74165	2.63698	0.104402	0.630152
Parp14	1.22224	7.85205	2.63423	0.104583	0.630889
Trappc6a	1.95359	3.58457	2.63258	0.104691	0.631193
Kif3a	-2.89051	2.77691	2.62944	0.104899	0.632091
Dync1li2	-1.02411	5.35858	2.62844	0.104965	0.632135
Baiap3	2.75794	4.39082	2.6239	0.105266	0.632885
Gm11346	-1.44742	5.26821	2.6245	0.105225	0.632885
Hbs1l	-1.21413	5.44947	2.62503	0.105191	0.632885
Ccdc186	-1.90934	3.98381	2.61977	0.10554	0.633473
Armc7	1.65878	4.4105	2.6201	0.105518	0.633473
Wdr41	1.92954	4.18757	2.6198	0.105537	0.633473
Usp9x	-1.28278	5.79599	2.6171	0.105718	0.634187
Setd6	1.59186	3.44265	2.61567	0.105813	0.634407
Dusp2	1.54069	5.36826	2.61301	0.105991	0.635118
Ocrl	-3.68189	2.22839	2.61092	0.10613	0.635601
Gm12276	3.91324	0.995303	2.60921	0.106245	0.635612
Spin2c	5.3693	0.668465	2.60913	0.10625	0.635612
Gm11427	-1.5341	5.21137	2.60804	0.106323	0.635697
Suv39h2	5.06393	1.25837	2.60593	0.106465	0.636033
Ifi203	1.24453	7.43235	2.60545	0.106497	0.636033
Msto1	2.45857	3.17479	2.60154	0.10676	0.636895
Ffar1	-2.74866	2.58502	2.60242	0.106701	0.636895
Thap2	-3.03734	3.12836	2.59971	0.106883	0.637046
Ankfy1	0.961462	5.9058	2.59942	0.106903	0.637046
Ipcef1	1.32733	6.66821	2.59754	0.107029	0.637446
2600006K01Rik	-4.369	2.40107	2.58176	0.108101	0.637783
Pilrb1	1.13759	5.64348	2.58081	0.108166	0.637783
Riok3	-2.59406	11.6766	2.58834	0.107653	0.637783
Tcta	-1.65231	4.82346	2.58182	0.108097	0.637783
Fas	1.32465	5.3746	2.57331	0.10868	0.637783
Fbxl5	1.19441	7.47235	2.57349	0.108668	0.637783
Baz2b	-1.26409	4.93473	2.57521	0.108549	0.637783
Spa17	-2.96959	2.38173	2.59214	0.107395	0.637783
Psme1	1.12047	8.36856	2.58991	0.107546	0.637783
Tada1	1.68062	4.80685	2.58183	0.108097	0.637783
Sdhaf4	-2.11013	3.32256	2.58541	0.107853	0.637783
Cdh17	3.77617	2.43228	2.59304	0.107334	0.637783
Sh2b1	-2.62486	2.69678	2.572	0.10877	0.637783
Hmgb2	1.75157	7.19965	2.57205	0.108766	0.637783
Nadk2	-2.77803	7.96661	2.57509	0.108558	0.637783
Gm15427	1.76567	3.24329	2.57341	0.108674	0.637783
Fkbp4	1.38375	5.7554	2.57646	0.108464	0.637783
Tnni2	4.2768	1.2293	2.59196	0.107408	0.637783
Gnpda1	1.41526	4.55729	2.58284	0.108028	0.637783
Grn	2.41836	2.85407	2.59096	0.107475	0.637783
2810004N23Rik	2.13038	4.20178	2.58316	0.108006	0.637783
Fasn	-3.27306	3.73845	2.5733	0.108681	0.637783
Cecr2	-3.26133	2.05899	2.59069	0.107494	0.637783
Mrs2	1.56339	4.44466	2.59062	0.107498	0.637783
Icam1	1.41297	5.83334	2.57876	0.108307	0.637783
3830406C13Rik	1.74308	3.69684	2.57154	0.108802	0.637783
Wdr78	-4.57984	2.64105	2.58453	0.107912	0.637783
Slc17a9	2.11344	2.85909	2.57786	0.108368	0.637783
Rap1a	-1.42969	8.03306	2.58138	0.108128	0.637783
Trmt61b	-2.80343	2.25073	2.57034	0.108884	0.637921
Dpagt1	2.62124	2.94801	2.56749	0.10908	0.638722
Zcchc18	1.93134	3.44966	2.5558	0.10989	0.639801
Ear2	-2.64025	6.08764	2.5537	0.110036	0.639801
Cd200r4	2.91638	3.03988	2.55815	0.109727	0.639801
Gm13012	3.11576	1.97201	2.55457	0.109976	0.639801
2810030D12Rik	-3.10246	2.14673	2.56057	0.109559	0.639801
Ube2g1	-1.54086	4.9129	2.55646	0.109844	0.639801
Mogs	1.85661	5.02529	2.55786	0.109747	0.639801
Micu2	1.02508	6.50888	2.5563	0.109855	0.639801
Zbtb11	-1.42507	4.40007	2.56263	0.109416	0.639801
Wrn	-1.34282	4.81901	2.56136	0.109504	0.639801
Thada	1.95513	3.68229	2.56287	0.1094	0.639801
Pemt	-10.3846	2.6114	2.56043	0.109569	0.639801
Lrp1	-2.45526	3.09763	2.55419	0.110002	0.639801
Gm17259	-4.74192	2.00186	2.55215	0.110144	0.639966
Rgs1	2.71156	4.2512	2.55159	0.110183	0.639966
Hars	1.20014	5.64217	2.54949	0.11033	0.64015
Tpgs1	2.62382	1.98869	2.54943	0.110334	0.64015
Bmt2	-1.91491	4.74317	2.54586	0.110583	0.640336
Pdap1	1.08013	5.21553	2.54546	0.110612	0.640336
Kifc1	2.86727	2.19813	2.54388	0.110722	0.640336
Dtx4	2.9291	2.28325	2.54676	0.110521	0.640336
Sema6d	-5.88725	0.803567	2.54451	0.110678	0.640336
Clpp	1.90703	3.03879	2.5442	0.1107	0.640336
Unc93b1	1.33552	6.49188	2.54264	0.11081	0.640497
Gm19951	-2.57298	3.26314	2.54032	0.110972	0.640751
Cdkn2aip	-1.63679	3.97337	2.54055	0.110956	0.640751
Phactr3	5.72776	1.12148	2.53835	0.111111	0.641209
Papd4	-1.31658	5.21245	2.5366	0.111234	0.641574
Ifi209	1.21086	8.77783	2.53529	0.111326	0.641764
Imp4	1.18681	5.25988	2.53301	0.111487	0.641843
Srrm1	1.79051	4.07227	2.53172	0.111578	0.641843
Sp4	-1.682	3.95839	2.53314	0.111478	0.641843
Ap3m1	-1.26337	6.8375	2.53249	0.111524	0.641843
Dnah17	4.40264	1.23243	2.527	0.111913	0.643422
Oma1	1.42846	4.03419	2.52432	0.112103	0.643455
Mat1a	-17.428	4.92606	2.52319	0.112183	0.643455
Bag1	-1.9844	9.84954	2.52272	0.112217	0.643455
Cmtr1	-3.06744	2.2124	2.52493	0.11206	0.643455
Gm10123	1.51823	4.24691	2.52375	0.112144	0.643455
Zdhhc1	-5.30689	0.861806	2.52182	0.112281	0.64348
Pdcd11	1.78149	3.56078	2.52058	0.112369	0.643643
Bin3	1.31613	6.03047	2.51727	0.112605	0.644234
Pdrg1	-1.32389	5.0936	2.51752	0.112588	0.644234
Gm4285	-4.49995	1.88407	2.51663	0.112651	0.644234
Lrrc29	2.72358	2.42392	2.51474	0.112786	0.644338
Aph1b	-2.95317	2.36047	2.51279	0.112926	0.644338
Serpinb1a	-1.26285	6.72337	2.51029	0.113105	0.644338
Galns	1.98321	3.36145	2.51342	0.112881	0.644338
Gcsh	-2.07339	3.80269	2.5097	0.113148	0.644338
Mff	-2.1382	9.75782	2.51087	0.113064	0.644338
Gdi1	-1.27898	5.85724	2.51081	0.113068	0.644338
Nr2c2	-1.16151	5.74976	2.50991	0.113133	0.644338
Serinc3	-1.91709	11.5442	2.49721	0.114048	0.64703
Rab35	1.38131	5.02808	2.49692	0.114069	0.64703
Hsd17b7	-3.44833	2.3219	2.49778	0.114007	0.64703
Zfp235	-2.44017	2.66484	2.50114	0.113764	0.64703
Tkt	1.35422	7.48771	2.49649	0.114101	0.64703
Nsun4	-1.621	3.33249	2.49908	0.113913	0.64703
Zfp825	-2.47589	4.07014	2.49761	0.114019	0.64703
Dennd6a	-1.23904	5.41931	2.49704	0.114061	0.64703
Gde1	-1.2501	4.69662	2.49482	0.114221	0.647033
Slc16a1	-1.74799	6.09305	2.49512	0.114199	0.647033
Il4ra	1.11562	6.655	2.4933	0.114332	0.647321
Zfp438	3.36796	1.49745	2.49112	0.11449	0.647878
Gzmk	6.14194	5.55865	2.48821	0.114702	0.647958
Mrpl28	1.34614	4.24107	2.48655	0.114823	0.647958
Prkar2a	2.52663	3.06524	2.47999	0.115303	0.647958
Gm49284	-3.29269	1.73917	2.48502	0.114935	0.647958
Srprb	1.47728	3.95488	2.48268	0.115106	0.647958
Gmps	1.22477	6.03656	2.4796	0.115332	0.647958
Rb1cc1	-1.21858	6.49337	2.48282	0.115096	0.647958
Ccna2	-1.47698	6.63797	2.47776	0.115466	0.647958
Scyl1	1.34444	5.09127	2.47833	0.115425	0.647958
Ulbp1	-3.59842	2.75814	2.48777	0.114734	0.647958
Tnks	-1.39774	4.42129	2.48292	0.115089	0.647958
Rexo2	-2.69581	8.38959	2.4792	0.115361	0.647958
Camsap1	-2.70583	2.12294	2.48615	0.114852	0.647958
Trem3	1.89351	5.27245	2.48511	0.114928	0.647958
Zcchc6	-1.59873	8.23721	2.48033	0.115278	0.647958
Zbtb37	-1.53381	4.29879	2.48209	0.115149	0.647958
Olfm4	4.98376	2.92933	2.47692	0.115528	0.647968
Rab10	-1.39677	6.72852	2.47504	0.115666	0.648405
Tlr3	3.44144	1.66911	2.47298	0.115818	0.648439
Ubtf	1.17405	6.29049	2.47251	0.115853	0.648439
Slc30a5	-1.1158	5.87866	2.47335	0.115791	0.648439
Slc35f2	3.56088	1.61902	2.46465	0.116433	0.651158
Atg4d	2.02724	3.67718	2.4643	0.116459	0.651158
Gm3724	-3.232	4.32013	2.46316	0.116544	0.651294
Ube4b	-1.62523	4.09964	2.46083	0.116717	0.651387
Gm17066	-2.45864	3.49513	2.46111	0.116697	0.651387
Cdc25b	-1.99576	8.54778	2.46049	0.116742	0.651387
Serpini1	-1.89592	4.11487	2.45918	0.11684	0.651596
Hdgfl2	1.59951	4.26456	2.45803	0.116926	0.651736
1700010I14Rik	-3.62248	1.41843	2.45718	0.116989	0.651751
Utp11	1.47194	4.53818	2.45618	0.117063	0.651831
Pigyl	3.29686	1.21812	2.45457	0.117183	0.652159
Erlec1	-1.60344	5.81618	2.45296	0.117303	0.652465
Anln	3.3039	2.41571	2.45222	0.117359	0.652465
Tmem143	4.0906	1.41848	2.45114	0.11744	0.652578
Gm16580	-3.05952	3.87722	2.44836	0.117648	0.653397
Pot1b	-1.39026	4.73319	2.44559	0.117855	0.65354
Sh3yl1	-4.11225	4.73463	2.44642	0.117793	0.65354
Klhl15	-2.42259	3.04666	2.44606	0.117821	0.65354
Cenph	4.11042	1.88738	2.43869	0.118375	0.655408
Ehmt2	1.24315	5.86641	2.43938	0.118323	0.655408
Fam151b	4.25715	1.99434	2.439	0.118352	0.655408
Rngtt	-1.50823	5.26415	2.43553	0.118613	0.656393
Bmp2k	-1.39195	5.63656	2.43466	0.11868	0.656421
Dhrs7b	-1.95987	3.42348	2.43348	0.118769	0.656578
Map7	2.39703	2.7459	2.42674	0.119281	0.658394
Aldh1a1	-2.47226	11.278	2.42821	0.119169	0.658394
Lrwd1	1.54186	4.55807	2.42735	0.119234	0.658394
Kcnip3	4.44455	1.18774	2.42326	0.119546	0.659382
Zfc3h1	-1.30054	5.40047	2.42279	0.119582	0.659382
Dnmbp	-3.74615	1.58001	2.42089	0.119727	0.659699
Immp2l	-2.53019	1.93998	2.42006	0.119791	0.659699
Tbc1d30	3.35121	1.55465	2.41963	0.119823	0.659699
Tubb6	1.68566	4.2889	2.41883	0.119884	0.6597
Gm13822	4.8194	2.83435	2.418	0.119948	0.659713
Piga	-2.34458	3.62368	2.41159	0.12044	0.660311
Kcnj2	-2.21315	3.52192	2.40891	0.120646	0.660311
Fbxo4	1.73071	4.58227	2.40796	0.12072	0.660311
Kif4	3.3292	3.92818	2.40816	0.120704	0.660311
2009-09-01	1.20717	6.21042	2.413	0.120331	0.660311
Ghitm	-2.37398	11.8019	2.40733	0.120768	0.660311
Ap1g2	1.99478	2.93439	2.41165	0.120435	0.660311
Rfc3	1.71418	3.98809	2.40778	0.120733	0.660311
Stk38l	-2.91591	3.09464	2.41047	0.120527	0.660311
Zfp61	2.53483	2.58908	2.41364	0.120283	0.660311
Dmtf1	-1.33658	4.96326	2.40623	0.120853	0.660311
Slc6a9	-3.87433	2.50213	2.40691	0.120801	0.660311
Ublcp1	-1.12945	6.1545	2.41152	0.120446	0.660311
Hebp1	-3.43837	7.30735	2.39725	0.121549	0.660347
Zfp451	-1.42571	4.42637	2.39496	0.121727	0.660347
Herc6	1.89501	6.26532	2.39875	0.121433	0.660347
Pias1	1.24538	4.64918	2.39578	0.121663	0.660347
AW112010	1.88959	8.74462	2.40359	0.121057	0.660347
Tmf1	-1.44581	5.02767	2.39394	0.121807	0.660347
Arl4a	-1.88334	6.80872	2.40002	0.121334	0.660347
Fgr	1.2265	7.03336	2.39876	0.121432	0.660347
Aqp1	-2.27774	5.75583	2.39308	0.121873	0.660347
Atg4a	-2.91809	9.18453	2.39561	0.121677	0.660347
Rnf20	-1.30852	7.08064	2.39194	0.121962	0.660347
Arhgap11a	2.14218	3.65543	2.39651	0.121607	0.660347
Trim12a	1.16753	7.08867	2.39347	0.121843	0.660347
Trim44	-0.973437	5.44937	2.4035	0.121064	0.660347
Fbxw2	-1.495	7.75249	2.39263	0.121908	0.660347
Tmem161b	-2.00687	3.4099	2.40003	0.121333	0.660347
Gstp1	-1.3888	5.52218	2.39321	0.121864	0.660347
Lpgat1	-1.05462	5.64676	2.39389	0.12181	0.660347
Dusp5	1.7978	4.13126	2.39076	0.122054	0.66035
Acd	4.56778	1.31627	2.39037	0.122085	0.66035
Ahnak2	5.97407	1.69172	2.38923	0.122173	0.660496
Socs3	1.61044	5.19029	2.3872	0.122332	0.661024
Lrrc59	1.14662	5.15319	2.38541	0.122473	0.661451
Fbl	1.24833	4.90119	2.38324	0.122643	0.661933
Ascc1	-3.48526	1.90186	2.38192	0.122746	0.661933
D3Ertd751e	-2.60475	2.78374	2.3821	0.122733	0.661933
[truncated: 8,781 more rows]

## Sheet: PbANKA_Late-Early
SYMBOL	logFC	logCPM	LR	PValue	FDR
Apoa5	30.5776	3.49144	49.9023	1.61599e-12	1.74203e-08
Cyp2a5	19.3998	2.05658	30.6332	3.11717e-08	0.000168015
Cxcl15	17.5217	2.1342	26.7479	2.31806e-07	0.000832956
Eif2ak2	-2.82275	5.68043	23.579	1.19888e-06	0.00323098
Nampt	-2.4121	7.00099	21.372	3.78261e-06	0.0081553
Cmpk2	-2.75023	7.02659	21.0022	4.58765e-06	0.00824248
Slfn5	-3.0441	7.54139	19.0736	1.25776e-05	0.0169568
Tor3a	-3.13399	5.23792	19.0726	1.25839e-05	0.0169568
Ifi204	-2.48865	8.05804	18.8069	1.44643e-05	0.017325
Smyd1	11.5554	0.689428	18.4267	1.7657e-05	0.0190342
Cps1	14.8491	3.24716	18.2059	1.98268e-05	0.0194303
Sftpd	12.8719	1.94496	17.8632	2.37368e-05	0.0213235
Alb	25.912	10.2259	16.5686	4.69217e-05	0.0389089
Ndrg2	5.34299	4.63851	16.0836	6.06077e-05	0.0450254
Gm6548	-2.60867	5.02798	16.0208	6.26513e-05	0.0450254
1600014C10Rik	-1.99143	6.72047	15.5344	8.10161e-05	0.0536399
Ifit2	-2.91648	7.23719	15.4528	8.45898e-05	0.0536399
Lilra6	-2.22325	5.08172	15.1884	9.73004e-05	0.0582722
Steap4	-4.77942	3.29359	15.0736	0.000103399	0.0586651
Slfn8	-2.53366	7.04656	14.7883	0.000120281	0.0648317
Sftpa1	15.0642	3.2417	14.2405	0.000160868	0.0788254
Ldhb	5.2156	3.75589	14.3181	0.000154374	0.0788254
Hck	-2.11957	8.19021	14.0833	0.000174888	0.0819694
Ddx60	-2.94238	5.2411	13.9069	0.000192092	0.0862814
Ifit3b	-3.32554	6.53	13.6032	0.000225803	0.0973663
Klhl18	-3.15359	3.07721	13.2756	0.00026888	0.107353
Gm5150	-2.3091	4.69787	13.3268	0.00026164	0.107353
Atp8b4	-1.82874	6.19166	13.1174	0.000292573	0.112641
Pnpt1	-2.31181	5.10586	12.5233	0.000401903	0.144417
Parp14	-1.97948	7.85205	12.5786	0.00039018	0.144417
Themis2	-1.83056	6.97036	12.4569	0.000416441	0.144814
Cers6	-1.74919	6.13782	12.2626	0.000462118	0.152579
Ddx58	-2.00423	7.04025	12.2427	0.000467078	0.152579
Usp18	-2.29737	7.25146	12.1732	0.000484799	0.15371
Ifi211	-2.67327	5.86627	12.0654	0.000513665	0.156627
Tnfrsf1a	-3.09265	3.76363	12.0316	0.000523057	0.156627
Oas1a	-2.1894	7.18257	11.9503	0.000546381	0.159189
Rnf213	-2.09459	8.12513	11.7398	0.000611763	0.169098
Tagap	-1.71781	6.4615	11.7683	0.000602472	0.169098
Mttp	12.8835	1.41426	11.6209	0.000652153	0.171621
Cd8a	2.93977	6.51888	11.5794	0.000666869	0.171621
Nod2	-9.11003	1.43218	11.5744	0.000668652	0.171621
Znrf3	6.44765	1.79244	11.3946	0.000736563	0.180458
Smtnl1	7.99488	2.39277	11.4133	0.000729207	0.180458
Il1rn	-2.77379	5.46631	11.3313	0.000762127	0.182572
Col18a1	11.4419	1.89291	11.1646	0.000833712	0.191222
Wdfy4	-1.88823	5.86305	11.1769	0.000828237	0.191222
Slc6a13	7.34826	2.53207	11.0601	0.000882037	0.194048
Ifi207	-2.03386	5.32239	11.0685	0.000878055	0.194048
Rel	-1.79264	5.12096	10.8476	0.00098922	0.209094
Prickle1	7.33331	1.31475	10.8795	0.000972323	0.209094
Znfx1	-1.91661	6.46602	10.6285	0.00111356	0.214757
Ifi209	-1.83125	8.77783	10.6796	0.00108323	0.214757
Gsap	-1.91487	6.07609	10.5975	0.00113244	0.214757
Nyx	11.7176	1.21513	10.5924	0.00113554	0.214757
Serpina3n	10.9976	1.98688	10.6155	0.00112146	0.214757
Cd40	-2.19263	4.7693	10.6641	0.00109236	0.214757
5430427O19Rik	-2.00779	4.97653	10.4595	0.0012202	0.219229
Egfr	12.0359	1.84322	10.49	0.00120022	0.219229
Ms4a4c	-2.4183	7.88843	10.4888	0.00120103	0.219229
Orm1	16.0517	4.59324	10.3113	0.00132215	0.219273
Trim30a	-1.8349	8.19176	10.4012	0.00125933	0.219273
Cd8b1	2.46998	7.539	10.3329	0.00130681	0.219273
Ifit3	-3.18097	8.41969	10.3724	0.00127916	0.219273
Cd83	-2.00451	6.48959	10.3534	0.00129234	0.219273
Ifi203	-1.79011	7.43235	10.1533	0.00144043	0.231758
Gm1966	-2.09284	7.15055	10.1716	0.00142619	0.231758
Klra17	-4.50738	3.16356	10.0879	0.00149249	0.236604
Ifi206	-1.91437	6.38948	10.0424	0.00152981	0.238337
Plcg2	-1.55064	7.37232	10.021	0.00154764	0.238337
Gm36161	-1.98344	5.1158	9.98675	0.00157671	0.239393
Ttr	16.9268	6.55702	9.96067	0.0015992	0.239436
Atf3	-2.38766	4.08773	9.88991	0.00166187	0.242094
Ccr9	6.32129	4.81566	9.90172	0.00165124	0.242094
Faah	2.56497	3.74268	9.85075	0.00169763	0.244005
Sh3bp2	-1.87418	4.87405	9.69224	0.00185048	0.262476
H2.T24	-1.58765	6.77776	9.66708	0.00187599	0.262639
Acod1	-3.5189	6.37685	9.61808	0.00192671	0.262911
Mpeg1	-1.61589	8.73793	9.62848	0.00191583	0.262911
Rbm43	-1.43612	5.95442	9.54012	0.00201029	0.270887
Cd28	1.84592	5.46827	9.44902	0.00211262	0.275988
Agmo	8.33321	2.14578	9.43834	0.00212496	0.275988
Ifit1bl1	-1.76393	7.64309	9.44767	0.00211417	0.275988
Irf5	-1.67004	6.42136	9.3408	0.00224108	0.287605
Lyrm9	2.75596	4.00812	9.30381	0.00228677	0.290017
Ighv1.76	-5.37034	0.990057	9.23905	0.00236907	0.296961
I830127L07Rik	-2.10504	6.58402	9.19786	0.00242299	0.300228
Gm8091	-6.46735	0.90805	9.09476	0.00256342	0.303667
Mt2	7.43202	0.193969	9.12859	0.00251645	0.303667
Gm12250	-2.02755	6.90785	9.09796	0.00255895	0.303667
Serpina1b	14.8983	6.47219	9.15293	0.0024832	0.303667
Trim30d	-1.87441	6.20724	9.05817	0.00261523	0.306437
Hpx	19.2481	6.55187	9.0089	0.00268669	0.308629
Tlr2	-1.81001	5.47163	9.00583	0.0026912	0.308629
Vnn3	-2.31923	4.58803	8.97612	0.0027353	0.310385
Fgr	-1.73017	7.03336	8.81119	0.00299388	0.329327
Tma16	-3.07031	2.57393	8.84698	0.00293573	0.329327
Amotl2	-5.69338	1.23279	8.82623	0.00296932	0.329327
Ifi47	-1.69577	8.65465	8.71423	0.00315736	0.329734
Cd200r3	-4.03231	2.27412	8.74225	0.00310921	0.329734
Cd69	-1.46164	6.4643	8.70057	0.00318111	0.329734
Dok3	-2.41023	4.44499	8.70829	0.00316767	0.329734
Trim30c	-4.46684	3.06862	8.74425	0.0031058	0.329734
Daxx	-2.61548	3.37747	8.71267	0.00316006	0.329734
Pml	-2.14956	5.33755	8.67106	0.00323303	0.331925
F9	9.17703	1.80528	8.62595	0.00331408	0.337036
Cd209a	-6.23347	2.60836	8.55175	0.0034519	0.347771
Rab39	-3.75913	2.2299	8.39497	0.00376261	0.3517
Camk4	3.21168	4.40146	8.45054	0.00364934	0.3517
Gpr35	-2.36183	4.18808	8.42288	0.00370529	0.3517
Angptl3	11.8829	3.10598	8.37638	0.00380129	0.3517
Ifih1	-1.75917	6.26589	8.3862	0.00378081	0.3517
Fndc10	10.5812	0.414871	8.35387	0.00384867	0.3517
Ankfy1	-1.2712	5.9058	8.4833	0.0035842	0.3517
Ptpro	-1.78859	5.37581	8.35334	0.00384978	0.3517
Gpr65	-1.70199	5.11718	8.43886	0.00367286	0.3517
Virma	-1.61187	5.61801	8.40863	0.00373445	0.3517
Trim34a	-1.5964	6.99916	8.47457	0.00360145	0.3517
Mcpt8	-7.72915	2.52897	8.29488	0.0039757	0.357163
Tnfaip2	-1.84446	7.02723	8.29482	0.00397584	0.357163
Zc3h6	4.92746	1.66884	8.25299	0.00406849	0.359494
1700096K18Rik	4.84818	1.70583	8.263	0.00404613	0.359494
Zcchc2	-1.98269	4.35415	8.23281	0.00411398	0.360559
Ear1	-8.71577	1.88989	8.21459	0.00415549	0.36126
Rora	4.03955	2.58157	8.18826	0.00421623	0.363608
Trbc2	2.19603	8.2978	8.06257	0.0045189	0.386617
Slc16a12	7.03836	1.58008	7.99668	0.00468631	0.394214
Fcgr1	-2.87488	5.35811	7.98471	0.0047174	0.394214
Prss34	-5.37595	2.81914	8.00527	0.00466414	0.394214
Nfkb1	-1.34075	7.24135	7.96132	0.00477877	0.39627
Serpina1a	10.5703	5.68433	7.85573	0.005066	0.402387
Plcg1	1.74489	5.6298	7.81278	0.00518781	0.402387
Myom1	4.76176	2.1103	7.83877	0.00511375	0.402387
Prdm2	-2.23679	3.81027	7.86826	0.00503102	0.402387
cl1	-3.92418	2.88441	7.86806	0.00503155	0.402387
Parp12	-1.81258	5.65034	7.82074	0.00516501	0.402387
Gsta4	8.07345	1.86219	7.90131	0.0049399	0.402387
Ppp3cb	1.77756	5.23478	7.81255	0.00518847	0.402387
Trbc1	1.94504	7.42603	7.86433	0.00504194	0.402387
Lat	2.16394	6.3931	7.79013	0.00525323	0.403019
4833420G17Rik	1.43579	6.63204	7.7839	0.00527139	0.403019
Sgpl1	-1.33124	6.0748	7.66214	0.00563915	0.405267
Fam111a	-1.54909	7.66954	7.7103	0.00549065	0.405267
Fam26f	-2.46898	4.46535	7.67232	0.00560743	0.405267
Abat	8.57411	1.79022	7.67653	0.00559437	0.405267
Ly86	-1.55057	7.42656	7.73058	0.00542933	0.405267
Irgm1	-1.59513	8.25618	7.674	0.00560222	0.405267
Serpinf1	9.61008	2.57508	7.72715	0.00543964	0.405267
Gbp6	-1.74524	5.47325	7.67581	0.0055966	0.405267
Slc15a3	-2.29549	4.55046	7.69776	0.00552895	0.405267
Gbp5	-2.93898	5.71316	7.64108	0.00570536	0.40731
Serpina1c	12.9634	6.31119	7.60055	0.00583505	0.408454
Nat8f1	4.67715	2.10792	7.61774	0.00577969	0.408454
Sox4	5.67817	2.90478	7.60587	0.00581786	0.408454
Gm4208	7.73437	1.05045	7.54318	0.00602377	0.414305
B230118H07Rik	7.95765	1.70565	7.53016	0.00606746	0.414305
Il33	9.55557	1.35841	7.5287	0.00607237	0.414305
Eci2	1.39409	5.69909	7.56156	0.00596264	0.414305
Pxk	-1.58804	4.92891	7.49834	0.00617558	0.418697
Stat2	-1.8231	6.08006	7.47197	0.0062667	0.422219
Pck1	10.4407	2.93545	7.43797	0.00638617	0.422349
Casp1	-1.49919	6.86625	7.44365	0.00636608	0.422349
Nadk	-1.47598	7.9903	7.44868	0.00634829	0.422349
Pilrb1	-1.42814	5.64348	7.41197	0.00647914	0.425885
Samd9l	-1.81566	8.59685	7.32706	0.00679241	0.439216
Ubd	11.4633	1.14511	7.30499	0.00687633	0.439216
Naaa	-1.60782	6.10859	7.31345	0.00684402	0.439216
Ms4a6c	-1.72746	7.39089	7.32538	0.00679877	0.439216
Pgrmc2	2.13298	3.72868	7.30255	0.00688567	0.439216
Slc18a2	4.15013	3.10365	7.28447	0.00695531	0.441048
Tcf7	2.75624	5.74088	7.18404	0.00735549	0.463697
Slamf8	-2.59011	4.3483	7.17125	0.0074081	0.464298
Apoa2	13.6812	6.69735	7.13381	0.00756437	0.471352
Helz2	-2.23837	5.71535	6.98781	0.00820666	0.493542
Ahr	-2.42585	3.26562	6.96189	0.00832639	0.493542
Sell	-1.49777	9.83958	6.98258	0.00823071	0.493542
Myb	3.81911	4.29936	6.98177	0.00823441	0.493542
H2.DMb1	-1.72294	5.05545	6.98539	0.00821776	0.493542
Cxcr5	-1.50016	6.99362	6.96438	0.00831484	0.493542
Trem3	-2.29945	5.27245	7.00037	0.0081493	0.493542
Igfbp5	9.47347	1.67748	6.96205	0.00832564	0.493542
P4ha1	-1.30378	5.15276	6.95077	0.00837832	0.493542
Dennd2c	3.03412	3.52354	6.96002	0.00833513	0.493542
Ctsc	-1.43754	8.185	6.9313	0.00847	0.496231
Tmem50b	-1.31313	5.46882	6.8826	0.00870386	0.501752
Fgg	12.8189	5.45342	6.88468	0.00869378	0.501752
Irf1	-1.74605	8.33598	6.88669	0.00868397	0.501752
Evl	-1.39357	5.30687	6.85032	0.00886256	0.508183
Tceanc	3.35848	2.50785	6.8154	0.00903752	0.510076
Ly6c2	-1.7698	9.31325	6.81841	0.00902227	0.510076
Arl5c	1.42624	6.2324	6.82003	0.00901413	0.510076
Phf11b	-1.53735	7.38656	6.78579	0.00918866	0.510542
Gm5431	-2.66654	4.54752	6.79168	0.00915836	0.510542
Arg2	-2.97864	4.02043	6.79664	0.00913298	0.510542
Gm45716	3.82875	3.33169	6.77676	0.00923522	0.510542
Ephx2	9.77797	3.47843	6.76282	0.00930765	0.511921
Il6ra	-1.25134	5.67116	6.74313	0.00941092	0.514973
Trbv14	4.14168	2.07886	6.72826	0.00948972	0.515151
Hmgcs2	11.1334	3.81186	6.7245	0.00950975	0.515151
Sp140	-1.35683	7.54665	6.71184	0.00957747	0.516226
Slfn4	-2.24504	8.98638	6.69789	0.0096527	0.517692
Irgm2	-2.68482	5.17581	6.68523	0.00972149	0.5188
Gadd45b	-2.50864	3.90004	6.60168	0.0101882	0.526952
Apoa1	12.0414	5.37136	6.62906	0.0100328	0.526952
Rhbdf2	-2.59033	2.99301	6.59677	0.0102164	0.526952
Ndufc2	1.717	4.45758	6.60375	0.0101764	0.526952
Snapc3	2.29539	3.72914	6.62479	0.0100569	0.526952
Trp53inp1	1.64188	7.22196	6.61715	0.0101001	0.526952
Oasl1	-3.13302	5.15702	6.62574	0.0100515	0.526952
Tlr7	-1.45809	5.86222	6.5807	0.0103091	0.529198
Irf7	-1.95606	9.14713	6.56587	0.0103953	0.529671
Tapbp	-1.38305	7.34229	6.56156	0.0104205	0.529671
Glce	2.74359	3.25532	6.55386	0.0104657	0.529671
Clca3a1	4.22204	3.72507	6.53621	0.01057	0.532093
Tnfaip3	-1.85526	4.8199	6.52912	0.0106123	0.532093
Gc	12.4472	6.69065	6.50674	0.0107466	0.535729
Ramp1	2.70292	3.78609	6.50054	0.0107842	0.535729
Fn3k	4.40198	2.84623	6.45904	0.0110389	0.540906
Gstp3	3.38391	4.02257	6.46691	0.0109901	0.540906
Acvrl1	-2.69121	3.22092	6.46408	0.0110077	0.540906
Snx8	-1.65049	4.55855	6.40871	0.0113562	0.550397
Fmo2	6.73214	1.33882	6.39615	0.0114368	0.550397
Ifi213	-1.8949	7.21726	6.41926	0.0112889	0.550397
Incenp	1.74437	4.77256	6.40116	0.0114046	0.550397
Gem	-2.62876	3.88489	6.37364	0.0115827	0.551557
Ifi208	-2.30337	6.06423	6.36523	0.0116378	0.551557
Med12l	5.56464	1.50906	6.35395	0.011712	0.551557
Pld4	-1.33975	7.1635	6.36205	0.0116587	0.551557
Rnf144a	-1.7045	5.15137	6.35324	0.0117167	0.551557
Apob	12.0712	4.71253	6.33175	0.0118595	0.552559
Hsp90b1	-1.38015	7.31465	6.3383	0.0118158	0.552559
Egln3	4.40772	2.01899	6.3193	0.0119431	0.552559
9930111J21Rik2	-1.70676	5.48043	6.32634	0.0118957	0.552559
Tdrd7	-1.67912	6.20996	6.3069	0.0120269	0.55406
2700081O15Rik	4.99261	1.84919	6.26682	0.012302	0.56002
Lpin1	1.85631	4.2399	6.26536	0.0123121	0.56002
Ms4a1	-1.71856	8.90973	6.27651	0.0122349	0.56002
Rgcc	2.48443	3.39946	6.20555	0.012735	0.564953
Trim30b	-2.3899	6.80184	6.23131	0.0125511	0.564953
Rubcnl	-1.5902	5.2463	6.21552	0.0126635	0.564953
Hcar2	-3.15818	4.50785	6.22702	0.0125815	0.564953
Orc1	5.54092	1.35902	6.20782	0.0127187	0.564953
Cirbp	1.78103	4.76223	6.23785	0.0125048	0.564953
Nlrc4	-2.15292	3.80937	6.1977	0.0127916	0.565138
Smarcc2	2.13028	3.18758	6.18637	0.0128738	0.566447
Mtus2	6.36906	0.999241	6.17195	0.0129792	0.568762
Arid5a	-1.54841	5.0335	6.1392	0.0132217	0.576167
Ncf2	-1.42255	8.10979	6.12079	0.0133601	0.576167
Cox17	-2.97634	2.97387	6.12055	0.0133619	0.576167
Etv5	4.85769	1.77848	6.12816	0.0133045	0.576167
Poglut1	-1.77862	4.57277	6.09909	0.0135252	0.580882
Aldh1a7	7.50162	2.5112	6.06439	0.0137934	0.590052
4930522L14Rik	3.06666	2.97982	6.0472	0.0139284	0.59328
Irf4	-1.43463	5.52905	6.0408	0.013979	0.59328
Gm11274	-4.11111	3.40628	6.02795	0.0140811	0.595271
Mgat4a	-1.36529	5.13718	6.01107	0.0142164	0.59714
Tmem106b	1.40344	5.85972	6.00863	0.0142361	0.59714
Lmbrd2	4.18691	1.99662	5.99222	0.0143691	0.600384
Zbp1	-1.82252	8.3301	5.98355	0.0144399	0.601011
Themis	1.90465	5.41008	5.97481	0.0145117	0.601676
Uxt	1.63035	4.78344	5.9657	0.0145868	0.602473
Tmem110	2.70216	3.0412	5.95847	0.0146468	0.602642
Il1f9	-1.9437	6.10024	5.90037	0.0151377	0.610309
Homez	2.42099	2.38046	5.91117	0.0150452	0.610309
A430035B10Rik	3.29084	2.1738	5.90846	0.0150684	0.610309
Myo1b	6.9462	0.827757	5.8702	0.0153993	0.610309
Gbp3	-1.53556	7.08111	5.87598	0.0153488	0.610309
Ifi205	-2.75701	5.6179	5.87699	0.01534	0.610309
Arfip1	3.42088	1.55394	5.87934	0.0153196	0.610309
Sp110	-1.15575	6.80682	5.8832	0.015286	0.610309
Gm30948	-4.46101	1.89201	5.92186	0.0149542	0.610309
Plekhg3	-3.16407	2.50767	5.91412	0.01502	0.610309
Lrp12	5.13972	0.748544	5.82291	0.0158188	0.611206
Cit	3.31396	3.80914	5.82701	0.0157819	0.611206
Aldoc	3.73345	2.37688	5.85326	0.0155483	0.611206
Arhgef37	-3.18148	3.4487	5.84514	0.0156201	0.611206
Samsn1	-1.29056	6.48966	5.83841	0.01568	0.611206
Zbed4	1.75789	4.67921	5.84967	0.01558	0.611206
Mbtd1	1.86439	4.5241	5.82565	0.0157941	0.611206
Gpr18	-1.72908	4.20932	5.79362	0.0160845	0.617048
Atl2	2.00526	4.54444	5.79835	0.0160412	0.617048
Pik3ap1	-1.78155	4.18603	5.68899	0.0170717	0.619639
Nlrc5	-1.30248	7.2981	5.69671	0.0169967	0.619639
Slfn9	-2.33279	4.13193	5.77009	0.0163012	0.619639
Clec7a	-1.79914	7.39362	5.70722	0.0168953	0.619639
Snapin	1.42575	5.01468	5.71465	0.0168239	0.619639
Cd79a	-1.92851	4.2457	5.69139	0.0170483	0.619639
Satb1	1.94335	5.52957	5.75983	0.0163966	0.619639
Serpina1d	13.088	5.71683	5.71544	0.0168164	0.619639
Msln	5.87132	1.34068	5.73864	0.0165957	0.619639
Slc22a23	4.17735	2.87478	5.72192	0.0167544	0.619639
Tceal9	2.32047	3.66695	5.69702	0.0169937	0.619639
Slfn1	-1.42066	7.15179	5.68979	0.0170639	0.619639
Sptlc1	-1.45894	5.22362	5.75951	0.0163996	0.619639
A530064D06Rik	-1.98014	4.35928	5.69078	0.0170542	0.619639
Ccnd2	-1.16994	6.16581	5.77513	0.0162546	0.619639
Samhd1	-1.38415	9.38906	5.69553	0.0170081	0.619639
Agtr1a	-6.05845	1.8515	5.67101	0.0172475	0.620706
Mccc1	2.98625	2.52513	5.66834	0.0172738	0.620706
Oaf	7.28538	1.8344	5.67204	0.0172374	0.620706
Wdr78	4.89889	2.64105	5.65437	0.0174119	0.62359
Mavs	-1.93001	4.37615	5.64602	0.0174951	0.624493
Selenoo	1.49958	4.79062	5.62432	0.0177129	0.628109
Parp9	-1.21371	7.54952	5.62747	0.0176811	0.628109
Zscan26	-1.41739	4.9165	5.59179	0.0180449	0.630086
Aldh7a1	4.39144	3.51551	5.59879	0.0179729	0.630086
Ly6i	-2.49588	5.96401	5.59923	0.0179684	0.630086
Gpr171	-1.31216	5.92416	5.6117	0.017841	0.630086
Trbv16	2.2562	3.78009	5.59023	0.0180609	0.630086
Cops7b	-2.88273	2.24691	5.56919	0.0182792	0.631672
Sp100	-1.23687	8.01192	5.56224	0.0183519	0.631672
Osgin2	1.7972	3.6906	5.57854	0.0181818	0.631672
Trac	1.72021	6.08781	5.56166	0.018358	0.631672
Nln	-1.62768	4.02123	5.55772	0.0183994	0.631672
Ankrd28	1.51811	5.82132	5.55118	0.0184683	0.632026
Fgl2	-1.32185	7.70106	5.5156	0.0188476	0.638923
Fstl1	6.88704	1.41327	5.51987	0.0188017	0.638923
Redrum	4.31227	4.74543	5.51676	0.0188352	0.638923
Gm14305	4.93698	1.37783	5.487	0.0191584	0.647422
Unc93b1	-1.42718	6.49188	5.47766	0.0192611	0.648857
Rragd	3.37712	3.74546	5.43442	0.0197436	0.655026
Adar	-1.22248	5.89102	5.43468	0.0197407	0.655026
Fcrl1	-1.26718	6.27195	5.42867	0.0198088	0.655026
Gbp4	-1.51117	7.17934	5.43223	0.0197684	0.655026
Tgtp1	-1.58407	7.31153	5.45349	0.0195293	0.655026
Nfkbia	-1.30179	5.63725	5.43894	0.0196926	0.655026
Alcam	-1.36951	4.88583	5.3818	0.0203479	0.6669
Prr5l	-1.54919	4.70188	5.37331	0.0204471	0.6669
Lztfl1	1.59635	4.34386	5.37001	0.0204859	0.6669
Slc16a1	1.87281	6.09305	5.36601	0.0205329	0.6669
Slc16a5	5.32643	2.63186	5.36925	0.0204948	0.6669
Plg	12.0355	3.69436	5.36549	0.020539	0.6669
Sftpc	14.7199	5.62176	5.34453	0.0207874	0.672938
9130221H12Rik	2.59094	3.1512	5.31564	0.0211348	0.675253
Rnf113a1	3.62371	1.42237	5.31381	0.021157	0.675253
Casp6	1.60237	3.85124	5.32332	0.0210419	0.675253
Snx20	-1.43475	5.51343	5.31257	0.0211721	0.675253
Smim20	1.46772	4.60009	5.32106	0.0210693	0.675253
Setdb2	-1.57661	4.4855	5.29543	0.0213815	0.677063
Cyb5a	1.4363	8.24355	5.27724	0.021606	0.677063
A530040E14Rik	-2.24064	4.19185	5.26262	0.0217883	0.677063
Capn3	2.21731	4.82931	5.30152	0.0213068	0.677063
Eml5	3.11118	2.68448	5.26613	0.0217443	0.677063
F2	12.9562	3.89813	5.26266	0.0217877	0.677063
Pdia4	-1.30222	6.57054	5.27055	0.0216891	0.677063
Fgf1	7.97678	1.45767	5.26539	0.0217535	0.677063
Dhx58	-2.12619	5.6811	5.26215	0.0217941	0.677063
Gm7592	-4.38949	1.67036	5.23909	0.0220848	0.682692
Enpp2	9.03167	2.50495	5.23276	0.0221653	0.682692
Klra10	-4.71748	1.0791	5.23449	0.0221433	0.682692
Maf	2.40304	3.67426	5.22754	0.0222319	0.682793
5730409E04Rik	5.85534	0.399992	5.20347	0.0225418	0.68451
Gmcl1	2.12669	3.98721	5.21161	0.0224365	0.68451
Aen	-1.6757	3.80691	5.2099	0.0224587	0.68451
Igf1	11.2463	3.64658	5.2045	0.0225285	0.68451
Cyp2e1	10.7804	4.61942	5.18065	0.0228398	0.69161
Ankle2	-1.0516	5.85956	5.15205	0.023219	0.694987
Gbp10	-3.14901	3.56698	5.14968	0.0232507	0.694987
Gbp2	-2.08287	10.3345	5.14796	0.0232737	0.694987
C2	6.42083	0.681431	5.15151	0.0232262	0.694987
Trim26	-1.15466	6.06789	5.14887	0.0232616	0.694987
Lipe	-2.03272	3.5245	5.13788	0.0234093	0.697105
Tarsl2	3.171	2.33345	5.12394	0.023598	0.700789
Gcdh	2.16697	4.52681	5.11473	0.0237236	0.701553
Ppm1h	1.2966	4.63761	5.11251	0.0237539	0.701553
Slc35e2	2.55694	3.26361	5.10648	0.0238366	0.702072
Trp53inp2	3.59861	2.25867	5.10108	0.023911	0.702344
Ncf1	-1.26464	7.75847	5.07976	0.0242068	0.70251
Gbp7	-1.527	7.2091	5.09035	0.0240593	0.70251
Neb	4.06904	2.1037	5.08208	0.0241743	0.70251
Ddx28	1.91253	4.20713	5.0772	0.0242425	0.70251
Vmn2r26	6.71418	2.13183	5.09007	0.0240633	0.70251
Ccr3	-2.72538	4.46288	5.06569	0.024404	0.703408
Pax5	-1.61053	5.70674	5.06792	0.0243726	0.703408
Zmym1	1.74681	3.8129	5.05802	0.0245123	0.704646
Mndal	-1.17552	8.25413	5.04025	0.024765	0.708437
Thy1	1.6798	6.6864	5.0395	0.0247756	0.708437
Jaml	-1.42591	6.22936	5.03195	0.0248839	0.709219
Galnt9	-3.114	1.49299	5.02843	0.0249345	0.709219
Gm18853	-2.95292	3.53943	5.02166	0.0250322	0.710125
Slfn2	-1.31646	9.36441	5.00072	0.0253368	0.715002
Cpsf6	1.01044	5.44694	5.00211	0.0253164	0.715002
Ptpn6	-1.25571	8.30835	4.97871	0.0256611	0.716273
Smchd1	-1.12993	7.47555	4.97103	0.0257752	0.716273
Gm32633	-2.76344	2.57163	4.98379	0.0255859	0.716273
Sparcl1	6.48839	1.91878	4.97378	0.0257343	0.716273
Syk	-1.16167	7.0377	4.96179	0.0259134	0.716273
Ophn1	2.88773	2.06604	4.97066	0.0257808	0.716273
Gstt1	4.3923	5.00308	4.98785	0.0255259	0.716273
Ltbr	-1.72943	4.06878	4.9626	0.0259012	0.716273
Rere	-1.32025	5.19334	4.95017	0.0260881	0.719258
Mapkapk2	-1.27525	7.63826	4.94459	0.0261724	0.71974
Rbmx	1.87256	4.83048	4.93546	0.026311	0.721375
Pim2	-1.63004	4.05451	4.93188	0.0263656	0.721375
Spata24	3.40692	1.64865	4.90957	0.0267082	0.727057
Trbv31	2.90338	2.58184	4.91238	0.0266649	0.727057
Pkib	-2.22331	4.21183	4.87248	0.0272883	0.729945
Cfd	6.18992	1.98451	4.87711	0.0272151	0.729945
Hfe2	7.29396	2.24766	4.8821	0.0271366	0.729945
S100a4	2.44311	2.81586	4.87978	0.0271731	0.729945
Vps37a	1.53603	5.23831	4.87715	0.0272145	0.729945
Cfap36	1.65197	3.86454	4.87256	0.027287	0.729945
Dntt	7.92393	5.49132	4.89276	0.0269695	0.729945
Hk3	-1.78467	4.91943	4.86163	0.0274603	0.732729
Mt1	4.48627	2.72928	4.84666	0.0276997	0.73432
Crot	1.15259	5.8057	4.83333	0.0279147	0.73432
Klf3	1.18622	6.52769	4.83246	0.0279287	0.73432
Dhrs3	1.59411	5.03481	4.83879	0.0278264	0.73432
Stra6l	8.94816	1.37335	4.842	0.0277746	0.73432
Fabp1	13.3553	6.28158	4.83284	0.0279227	0.73432
Ddx24	-1.08308	6.50231	4.80448	0.0283859	0.734451
Slc7a6	1.66863	3.91102	4.80816	0.0283253	0.734451
Tcp11l1	3.48889	2.47884	4.80968	0.0283004	0.734451
Cybb	-1.22404	6.17278	4.82634	0.028028	0.734451
Aim2	-1.28419	5.53704	4.81019	0.0282919	0.734451
Naip2	-1.23926	6.04774	4.81899	0.0281478	0.734451
Dctn2	1.25957	6.49695	4.8002	0.0284564	0.734451
Csf1	-2.82675	3.05022	4.79885	0.0284787	0.734451
Psmb9	-1.36929	6.86455	4.78805	0.0286578	0.735418
Edem1	1.16223	7.744	4.78715	0.0286728	0.735418
Swap70	-1.28058	6.36175	4.78427	0.0287209	0.735418
Gpr141	-1.60175	6.4558	4.76674	0.0290148	0.741183
Myo1e	-1.5498	4.08795	4.75046	0.0292905	0.7412
Sacm1l	1.12812	5.69473	4.7563	0.0291913	0.7412
Tmem243	-1.26789	5.53767	4.73438	0.0295655	0.7412
Zbtb5	-1.55007	3.80362	4.73778	0.0295072	0.7412
Kif18a	2.63342	3.10294	4.73844	0.0294959	0.7412
Usb1	-1.32624	5.11142	4.75235	0.0292583	0.7412
Slc6a19	3.93889	2.42177	4.73952	0.0294773	0.7412
Ctsl	2.36437	5.53771	4.74733	0.0293439	0.7412
Gstcd	-2.8827	2.408	4.71926	0.0298266	0.743724
Filip1l	-1.15094	6.6085	4.7121	0.0299511	0.743724
Ifi27l2a	-2.02274	9.1481	4.71589	0.029885	0.743724
Ackr1	3.89642	3.73779	4.70865	0.0300111	0.743724
Cd247	1.37831	6.74662	4.72383	0.0297474	0.743724
Tomm7	1.14211	6.07008	4.66754	0.030738	0.748028
S100pbp	2.01373	3.39081	4.67534	0.0305987	0.748028
B130034C11Rik	6.24969	0.68385	4.67589	0.0305889	0.748028
pnpep1	1.27845	5.58724	4.64618	0.0311227	0.748028
Tlcd1	4.33809	1.62057	4.67238	0.0306515	0.748028
Sgk3	-1.15386	6.08511	4.6591	0.0308893	0.748028
M1ap	-3.36947	3.11962	4.66454	0.0307916	0.748028
Rag1	9.29645	5.43481	4.67541	0.0305975	0.748028
Zfp53	1.17851	5.4332	4.69028	0.0303338	0.748028
Gk	-1.50757	4.8868	4.65439	0.0309742	0.748028
Icam1	-1.39544	5.83334	4.65151	0.0310263	0.748028
Stambp	2.47618	2.6214	4.64446	0.0311539	0.748028
C2cd2l	2.85813	2.16785	4.64051	0.0312257	0.748028
Il5ra	-1.75888	4.18102	4.69478	0.0302543	0.748028
Cdkn1b	1.3959	6.31809	4.64246	0.0311903	0.748028
Slc2a6	-1.66028	5.54263	4.62091	0.0315845	0.751084
Phf11c	-1.61415	4.9825	4.61456	0.0317016	0.751084
P4ha2	5.95997	0.547197	4.61484	0.0316964	0.751084
Zufsp	-1.5246	5.45754	4.62553	0.0314996	0.751084
Snx18	-1.39832	5.34616	4.62419	0.0315242	0.751084
Ifitm1	-1.52309	6.16553	4.60936	0.0317979	0.751713
Inmt	8.43038	3.9694	4.58874	0.0321827	0.757629
Bcl2l11	1.26562	4.82125	4.58842	0.0321887	0.757629
Yipf5	-1.71092	4.30162	4.57857	0.0323743	0.760337
Tmed4	1.42416	4.22995	4.57344	0.0324713	0.760959
Gm8995	-1.45167	8.34855	4.56702	0.0325933	0.76216
2310039H08Rik	2.43398	2.47765	4.56011	0.032725	0.763584
Tap1	-1.2353	7.48037	4.5477	0.0329631	0.765823
Ar	3.958	1.2578	4.5507	0.0329052	0.765823
Lin52	4.33672	1.59369	4.53677	0.0331742	0.76907
Ifi35	-1.25023	6.97254	4.5292	0.0333212	0.770821
Dzip1	2.42649	3.36759	4.50688	0.0337588	0.774613
Bmf	2.21724	3.68207	4.50655	0.0337654	0.774613
Rasa4	-1.69488	3.8774	4.50982	0.0337008	0.774613
Cdh23	4.52664	1.52194	4.50618	0.0337725	0.774613
Tulp4	2.18764	3.25223	4.49086	0.0340766	0.779926
Rnase6	-1.10327	7.02225	4.48075	0.0342786	0.781233
Elmod2	1.85413	4.02658	4.48434	0.0342068	0.781233
Ms4a2	-2.78678	2.80803	4.47024	0.0344901	0.781618
Zscan12	2.82217	2.04489	4.46552	0.0345855	0.781618
Vill	-1.70328	4.0756	4.46842	0.034527	0.781618
Upf3b	1.40096	4.44282	4.47272	0.0344401	0.781618
Abr	-1.6362	4.4337	4.45417	0.034816	0.785182
Rab3d	-1.41176	4.27547	4.44119	0.0350818	0.789524
Parp10	-1.41861	5.903	4.4279	0.0353559	0.794035
Tbc1d1	-0.979153	5.59589	4.41515	0.0356211	0.795064
Gsta3	10.4402	4.22426	4.41866	0.035548	0.795064
Qdpr	1.6079	4.63235	4.41506	0.035623	0.795064
Fes	-1.39148	6.28865	4.40731	0.0357853	0.796364
Ifi214	-1.60683	5.57626	4.40522	0.035829	0.796364
Iqcc	1.59292	3.61223	4.39936	0.0359524	0.797463
Rnaseh2b	1.23779	5.27299	4.38827	0.0361871	0.797952
Dag1	-2.16969	2.56548	4.38782	0.0361965	0.797952
Cyp4f18	-1.36511	6.60274	4.3941	0.0360634	0.797952
Spast	1.05931	5.16242	4.37374	0.0364967	0.802927
Slc25a4	1.07773	6.04715	4.36289	0.03673	0.806413
Tpp1	1.45057	4.10624	4.35621	0.0368742	0.807934
Plekho1	-1.18353	5.86116	4.33888	0.0372515	0.814546
Rufy2	1.80926	3.66704	4.31212	0.0378417	0.819254
Fads1	2.82	3.84242	4.32181	0.0376269	0.819254
Cd300lb	-1.22616	5.98724	4.29991	0.0381143	0.819254
Tmem119	5.45378	1.09396	4.31956	0.0376767	0.819254
N4bp1	-1.18021	4.93176	4.30062	0.0380985	0.819254
1700010I14Rik	3.57347	1.41843	4.30642	0.0379688	0.819254
Trim24	1.51862	4.91276	4.30307	0.0380436	0.819254
Hdac7	1.76068	4.27518	4.29829	0.0381508	0.819254
Rai14	4.41244	1.85806	4.30253	0.0380558	0.819254
Cd22	-1.09566	7.13079	4.2946	0.0382337	0.819402
Oosp1	6.29925	0.873152	4.28998	0.0383377	0.820001
Erlec1	1.64017	5.81618	4.28341	0.038486	0.820529
Gm14548	-2.0869	4.5699	4.27544	0.0386669	0.820529
Arhgef4	2.52311	2.49181	4.27836	0.0386007	0.820529
Hspa8	-1.27194	10.0808	4.28032	0.0385562	0.820529
Fbxo34	1.57241	3.75728	4.26731	0.0388525	0.821235
Sult1a1	5.76831	4.31618	4.26826	0.0388306	0.821235
Ncr1	-2.89934	5.45337	4.25804	0.0390649	0.82411
Mns1	2.39329	3.52682	4.25454	0.0391456	0.824199
Ogn	7.37668	1.71034	4.24964	0.0392586	0.824354
Hspa5	-1.07597	8.73156	4.2476	0.0393059	0.824354
Cxcl10	-3.03205	4.79046	4.23661	0.039561	0.824764
Chic1	3.17666	1.51555	4.23396	0.0396229	0.824764
Casp8	-1.23755	7.12394	4.23032	0.039708	0.824764
Pole3	1.34923	4.50232	4.23154	0.0396793	0.824764
Gm20559	-1.40011	7.37639	4.23594	0.0395766	0.824764
Sall2	4.56146	0.934155	4.1915	0.0406271	0.826921
Lat2	-0.982212	6.15074	4.20557	0.0402914	0.826921
Folr2	4.31448	2.45381	4.17212	0.0410943	0.826921
Rufy1	-1.14333	4.55438	4.17616	0.0409964	0.826921
Sc5d	1.33385	4.88741	4.18042	0.0408935	0.826921
Dut	1.41515	5.73566	4.17123	0.0411159	0.826921
Igkv12.89	-4.8865	0.779909	4.22068	0.0399341	0.826921
Polr1a	-1.48547	4.57548	4.20416	0.0403249	0.826921
Cdc37l1	1.37533	4.81722	4.19657	0.0405058	0.826921
Igfbp3	6.06013	1.01521	4.19213	0.0406119	0.826921
Cxcr6	2.0441	5.29313	4.18574	0.0407655	0.826921
Cr2	-2.72914	5.10519	4.19022	0.0406579	0.826921
Ogfr	-1.11836	6.95885	4.19111	0.0406365	0.826921
Hopxos	5.69788	0.73135	4.17859	0.0409377	0.826921
Kmt2e	1.37125	4.47458	4.20559	0.040291	0.826921
Pilra	-1.22643	6.94028	4.17379	0.0410538	0.826921
Gm7972	3.35882	1.91191	4.2167	0.0400279	0.826921
Gpr183	-1.1577	5.75547	4.15953	0.0414008	0.8311
Gm20506	-2.45601	2.68568	4.14648	0.0417212	0.834423
Cd37	-1.37609	4.85796	4.14691	0.0417107	0.834423
Kmo	-1.3245	5.72632	4.13895	0.0419072	0.836592
Crbn	1.12197	5.97081	4.12191	0.0423313	0.839112
Hist2h2be	2.89089	2.78071	4.12889	0.0421571	0.839112
Gp1ba	3.1036	3.45097	4.11587	0.0424828	0.839112
Abca6	7.24359	1.57205	4.12409	0.0422767	0.839112
Rmnd5a	2.2368	8.49275	4.12105	0.0423528	0.839112
Bmpr2	-1.86861	3.75702	4.11516	0.0425005	0.839112
Zfp422	1.74988	3.96519	4.10937	0.0426462	0.840449
Sh2d3c	-2.01496	3.61245	4.10096	0.042859	0.843102
Ptprv	-3.27082	1.13179	4.09768	0.0429421	0.843198
Reep2	4.70695	1.0793	4.08729	0.0432069	0.846278
Fgb	12.1895	5.23427	4.07289	0.0435768	0.846278
Oas1b	-1.60227	3.75295	4.07639	0.0434864	0.846278
Spi1	-1.12667	5.32267	4.07198	0.0436	0.846278
Gbp9	-1.3094	6.89309	4.08028	0.0433864	0.846278
Ero1lb	-1.0816	6.30687	4.07011	0.0436485	0.846278
2810474O19Rik	-0.963576	7.00965	4.07565	0.0435056	0.846278
Ap3s1	1.50463	6.13254	4.05794	0.0439641	0.850868
Zc4h2	3.51433	1.53245	4.05069	0.0441534	0.852148
Atp5j	1.51607	6.58394	4.04935	0.0441884	0.852148
Gm44250	3.81606	2.02498	4.03856	0.0444717	0.85608
Gemin8	5.31916	1.10481	4.02795	0.0447523	0.859947
Gpr34	-2.56593	2.48751	4.02015	0.0449598	0.860892
Gad1.ps	-3.04206	3.10927	4.02009	0.0449612	0.860892
Armcx5	2.82022	3.13183	3.98411	0.0459315	0.862599
Cd63	2.39601	2.96301	3.99446	0.04565	0.862599
Mbip	1.59461	3.48394	4.00803	0.0452841	0.862599
Kif19a	-4.53425	1.09383	3.9788	0.0460764	0.862599
Oas1g	-1.84968	5.12028	4.00949	0.0452449	0.862599
Trmt61b	2.56192	2.25073	3.98684	0.0458569	0.862599
Car3	8.71629	4.55751	3.98006	0.046042	0.862599
Myadm	-1.73887	4.10345	3.98877	0.0458045	0.862599
Trim12a	-1.09326	7.08867	4.00775	0.0452917	0.862599
Ilk	1.41645	7.80376	3.98178	0.045995	0.862599
Elmo2	-1.63444	4.33435	3.97828	0.0460906	0.862599
Lck	1.31475	7.89409	3.99453	0.0456483	0.862599
Tarbp1	2.58561	2.61779	4.00437	0.0453824	0.862599
Fanca	-1.93311	3.58204	3.97309	0.0462328	0.86376
Fahd2a	1.94268	2.63082	3.95759	0.0466604	0.865254
Htatip2	1.73339	6.32762	3.9377	0.0472154	0.865254
Fga	11.1299	4.47649	3.9302	0.0474263	0.865254
Apoh	8.65998	4.93	3.94382	0.0470438	0.865254
Tifa	-1.11254	5.44119	3.91124	0.0479643	0.865254
Gm6545	-2.89089	2.62155	3.94091	0.0471254	0.865254
Serpinc1	10.4741	4.0944	3.91347	0.0479006	0.865254
Tbc1d30	-3.33984	1.55465	3.93404	0.0473182	0.865254
Sppl2a	-0.888586	6.99551	3.95207	0.0468139	0.865254
Layn	3.68428	1.78505	3.90724	0.0480786	0.865254
Sec23ip	-1.04991	4.62227	3.95206	0.0468141	0.865254
Tmem263	1.82187	3.54942	3.90919	0.0480227	0.865254
Chit1	4.32148	0.943723	3.92571	0.0475531	0.865254
Mrpl36	1.09056	4.68636	3.91278	0.0479202	0.865254
lr4a	2.07267	3.88441	3.92172	0.047666	0.865254
Gm21188	-1.47988	5.01259	3.91899	0.0477437	0.865254
Hspb8	6.66888	2.03074	3.93512	0.0472879	0.865254
Ascc3	-1.05201	5.55898	3.91847	0.0477585	0.865254
Numb	-1.59126	4.1327	3.94909	0.0468967	0.865254
5033406O09Rik	2.16171	3.74092	3.91397	0.0478864	0.865254
Timm9	-1.62811	3.38284	3.95931	0.0466128	0.865254
Wee1	3.21453	2.17268	3.92317	0.0476251	0.865254
Gm14295	4.63139	1.10268	3.90033	0.0482767	0.865929
Sertad3	1.57599	3.7539	3.90056	0.04827	0.865929
Snrnp48	1.35671	4.56106	3.89501	0.0484299	0.867233
Ces2g	4.1267	2.61523	3.87662	0.0489631	0.872937
Uqcrq	1.84629	4.32381	3.86344	0.0493492	0.872937
Col27a1	5.90935	0.779298	3.87143	0.0491145	0.872937
A530030E21Rik	-2.48175	3.70372	3.87909	0.048891	0.872937
Cep85	1.60115	4.49274	3.86672	0.0492527	0.872937
Gm38331	9.92928	4.72173	3.85909	0.0494772	0.872937
Serpina3k	12.7921	7.45872	3.87367	0.0490491	0.872937
Noct	1.68056	3.872	3.86011	0.0494471	0.872937
Bnip3	2.06461	3.81398	3.8685	0.0492003	0.872937
Cyp3a11	10.0557	3.67343	3.85001	0.0497456	0.874808
Ier5	-0.94383	6.08629	3.85196	0.049688	0.874808
1810041H14Rik	3.3854	1.45739	3.84478	0.0499011	0.876114
Tpd52	-1.08531	7.33132	3.83854	0.0500872	0.877952
Hdac9	-2.04513	3.62585	3.81354	0.0508398	0.879926
Tnks1bp1	-2.34866	2.07183	3.82805	0.0504017	0.879926
Rsu1	1.49371	6.94775	3.8112	0.0509109	0.879926
Ddit4	1.79774	4.17688	3.82049	0.0506294	0.879926
D430019H16Rik	7.74416	0.574004	3.80497	0.0511006	0.879926
Pitpnm2	4.16764	0.850353	3.7857	0.0516922	0.879926
Pilrb2	-1.27682	5.49135	3.80725	0.0510311	0.879926
Sdhaf1	2.44095	3.66572	3.79197	0.0514991	0.879926
Adipoq	5.90886	1.14489	3.78852	0.0516053	0.879926
Angptl4	4.68484	1.89979	3.8034	0.0511487	0.879926
Nfatc3	0.942298	6.84907	3.80667	0.0510487	0.879926
Gabarapl1	1.45969	6.54827	3.83095	0.0503145	0.879926
Cd3g	1.48906	6.40958	3.78381	0.0517507	0.879926
Gm17066	2.33936	3.49513	3.78979	0.0515662	0.879926
Apobr	-1.19274	5.88589	3.80493	0.0511019	0.879926
Epb41l4b	6.56453	1.09088	3.79464	0.0514171	0.879926
Cramp1l	2.10399	2.79314	3.8093	0.0509687	0.879926
Herpud2	1.38017	4.18307	3.79833	0.0513038	0.879926
Lrrk2	-1.21959	6.41104	3.7901	0.0515565	0.879926
Ccdc28b	1.45578	3.72049	3.77723	0.0519545	0.881999
Il13ra1	-1.35963	5.85176	3.74557	0.0529478	0.882652
Sesn1	0.921672	6.35986	3.76533	0.0523256	0.882652
Baz1b	-0.943081	6.09416	3.75105	0.0527744	0.882652
Gm5069	-3.21985	2.25659	3.73837	0.0531763	0.882652
Naf1	4.61822	1.40406	3.75659	0.0525998	0.882652
4933407K13Rik	-5.31452	1.13563	3.75094	0.0527777	0.882652
Dpy19l1	-1.19522	5.21027	3.75042	0.0527941	0.882652
Sgcb	-2.31336	3.04461	3.7479	0.052874	0.882652
Nmi	-1.13288	6.43279	3.74647	0.0529191	0.882652
2900026A02Rik	-3.71556	1.43721	3.73696	0.0532211	0.882652
Mex3b	5.68735	1.05836	3.74057	0.0531065	0.882652
Sema6d	5.40956	0.803567	3.75332	0.0527027	0.882652
Lst1	-1.22437	6.10539	3.73723	0.0532126	0.882652
Hmgcr	1.13979	5.18961	3.73718	0.0532143	0.882652
Efnb2	5.97661	1.29724	3.7455	0.0529498	0.882652
Ndufc1	1.60942	4.4106	3.73429	0.0533062	0.882704
Rcbtb2	1.21635	5.2654	3.69016	0.0547344	0.883125
Arntl	1.48053	3.75622	3.71439	0.0539452	0.883125
Wfikkn2	3.60651	1.51241	3.67895	0.0551035	0.883125
Usmg5	1.32189	7.18552	3.69029	0.0547301	0.883125
Ppp3r1	0.971915	6.08091	3.70831	0.0541422	0.883125
Zfp931	-2.64036	2.20711	3.67062	0.0553796	0.883125
Lrrc1	2.91013	2.80436	3.67796	0.0551364	0.883125
Sh3bp5	-1.35968	4.93879	3.67406	0.0552654	0.883125
Cars	-1.64812	4.32934	3.71055	0.0540695	0.883125
Rassf3	-1.89114	3.93024	3.71538	0.0539135	0.883125
Gphn	1.97171	3.07565	3.73083	0.053417	0.883125
Gm17344	4.60671	2.69405	3.67525	0.0552258	0.883125
Adgb	5.42687	1.25723	3.68638	0.0548584	0.883125
9930111J21Rik1	-2.49105	2.666	3.70344	0.0543003	0.883125
Gcsam	3.82339	2.68532	3.70349	0.0542988	0.883125
Sft2d3	-2.69304	2.19796	3.7177	0.0538383	0.883125
Hes6	1.37953	4.29456	3.68112	0.0550317	0.883125
Polr1b	-1.07834	4.11594	3.6721	0.0553305	0.883125
Apold1	4.31504	0.959885	3.71012	0.0540837	0.883125
Rundc3b	-1.91339	2.69508	3.69002	0.054739	0.883125
BC035044	-1.49362	4.46448	3.69473	0.0545846	0.883125
Rarres2	6.78041	4.16308	3.70587	0.0542215	0.883125
Rnf145	0.944868	6.35453	3.68481	0.0549101	0.883125
Itpr3	-1.15597	4.43993	3.67318	0.0552947	0.883125
Peli1	-1.04861	5.49366	3.70491	0.0542526	0.883125
Papd4	1.14499	5.21245	3.66508	0.055564	0.884
Mkrn2	1.26295	4.17758	3.65993	0.0557359	0.884
Gtf2h5	1.24203	5.35081	3.65669	0.0558445	0.884
Golph3	1.15486	5.46029	3.66343	0.0556189	0.884
Pdia6	-1.09841	6.22195	3.65884	0.0557726	0.884
Rbpms2	2.43803	3.58996	3.64634	0.0561926	0.885853
Cd3d	1.27731	6.58706	3.64185	0.0563443	0.885853
Gm8369	1.35778	6.4188	3.64454	0.0562534	0.885853
Srd5a3	1.33697	4.48035	3.64102	0.0563725	0.885853
Ndufb10	1.05135	5.75943	3.6506	0.0560489	0.885853
Selenoh	1.32572	4.06925	3.63528	0.056567	0.887617
Plaur	-1.59812	4.19663	3.62965	0.0567587	0.887837
Fdx1	2.83438	2.70493	3.63226	0.0566697	0.887837
D930016D06Rik	2.73019	2.74198	3.62762	0.0568281	0.887837
Gab3	2.13104	3.25847	3.6243	0.0569414	0.888319
Mir703	2.84875	1.77637	3.61988	0.0570932	0.889399
Ptdss2	1.75808	4.33665	3.60994	0.0574352	0.892559
Gabbr1	2.14189	3.39805	3.60918	0.0574616	0.892559
Tlcd2	4.82129	1.83423	3.59707	0.0578815	0.892908
Dennd5b	-1.90649	3.55005	3.58947	0.0581467	0.892908
Il4i1	-2.64288	2.36927	3.58958	0.0581429	0.892908
Mettl16	-1.34177	4.19591	3.59388	0.0579926	0.892908
Bpifa1	4.93228	1.14128	3.59845	0.0578334	0.892908
Kansl1l	2.07439	3.77975	3.60607	0.0575689	0.892908
Igkv14.111	-4.4295	1.23623	3.5924	0.0580443	0.892908
8430429K09Rik	3.50009	1.36753	3.58971	0.0581383	0.892908
Ddx3x	0.965618	7.59761	3.5769	0.0585885	0.894595
Cd27	1.79074	4.70756	3.57869	0.0585252	0.894595
Ptpn1	-1.07888	5.89782	3.58063	0.0584571	0.894595
Igkv1.135	-2.84125	1.99721	3.58383	0.0583443	0.894595
Tmem63b	2.60414	2.34508	3.55524	0.0593578	0.895398
Klhdc10	1.23006	4.1871	3.56145	0.0591362	0.895398
Clec5a	-1.51335	4.7571	3.55598	0.0593312	0.895398
Srp9	0.954228	6.02563	3.56409	0.0590422	0.895398
Eefsec	2.03644	3.4736	3.56472	0.0590198	0.895398
Rchy1	-1.06815	5.4818	3.56135	0.0591395	0.895398
Lbp	3.95842	2.27935	3.56075	0.0591609	0.895398
BE692007	-1.31803	4.20425	3.55438	0.0593887	0.895398
Dlg3	4.26215	1.45551	3.57105	0.0587951	0.895398
Lacc1	-3.99507	0.966714	3.52219	0.0605522	0.897017
Gm4070	-1.82999	6.51822	3.53454	0.0601031	0.897017
Htra1	5.34358	1.11051	3.53357	0.0601383	0.897017
Hnrnph2	-0.789306	6.20702	3.52679	0.0603845	0.897017
Gm3531	2.15216	1.46536	3.52149	0.0605778	0.897017
Gm20324	3.81669	1.13959	3.53342	0.0601435	0.897017
Hsh2d	-1.32384	4.99425	3.54283	0.0598033	0.897017
Retsat	3.48852	2.80626	3.53506	0.0600843	0.897017
1500011B03Rik	1.70231	3.882	3.52977	0.0602763	0.897017
Parva	4.65902	1.26727	3.52956	0.0602838	0.897017
Fam129a	-1.09016	5.54104	3.52456	0.0604658	0.897017
Scrg1	3.73288	2.46522	3.53241	0.0601802	0.897017
Adtrp	7.18147	0.887234	3.54391	0.0597644	0.897017
Bccip	-0.977388	5.15315	3.4586	0.0629234	0.899675
Mier1	1.05005	6.18382	3.49729	0.0614695	0.899675
9830132P13Rik	-4.76069	2.47562	3.49894	0.0614082	0.899675
Ighv5.6	-2.74316	1.42127	3.48927	0.0617678	0.899675
Taok3	1.90017	2.57471	3.4946	0.0615691	0.899675
Ptafr	-1.4124	5.09123	3.50651	0.0611281	0.899675
Rhno1	1.43758	3.86296	3.46593	0.0626452	0.899675
Ccdc51	-2.06096	2.6928	3.45871	0.0629195	0.899675
Zfp944	1.76297	3.85212	3.46851	0.0625476	0.899675
St14	-2.32194	1.32224	3.49678	0.0614882	0.899675
Acaa2	1.48843	5.91458	3.45774	0.0629561	0.899675
Thbs3	4.83516	1.34873	3.47821	0.0621821	0.899675
Emc3	0.867455	6.12308	3.45631	0.0630106	0.899675
Sowahc	-1.91597	3.96375	3.49426	0.0615818	0.899675
B230219D22Rik	1.07146	5.32729	3.46425	0.0627088	0.899675
Ulk1	1.57794	3.9354	3.5001	0.0613652	0.899675
Tarm1	-1.96112	3.38923	3.46593	0.0626451	0.899675
Suox	1.31746	3.8361	3.50091	0.0613351	0.899675
Cenpk	1.68714	3.74848	3.48497	0.0619283	0.899675
Fxyd1	6.21537	1.83278	3.48362	0.0619789	0.899675
Dhcr7	4.07346	1.17571	3.46154	0.0628119	0.899675
Gm13822	-4.2554	2.83435	3.45822	0.0629381	0.899675
Gpt2	4.9616	1.73436	3.48036	0.0621013	0.899675
Gm26510	-2.25485	2.78851	3.4743	0.0623289	0.899675
Uba3	1.05781	5.23992	3.4632	0.0627487	0.899675
Det1	-1.80109	3.31533	3.45753	0.0629641	0.899675
Rassf7	2.78562	2.01092	3.46046	0.0628529	0.899675
Pccb	1.8574	3.5825	3.44765	0.0633418	0.900823
Srpk3	-1.64129	3.85394	3.4515	0.0631944	0.900823
1500015A07Rik	3.16904	1.89211	3.44982	0.0632587	0.900823
Fn3krp	1.87963	3.36927	3.44299	0.0635206	0.902177
Rbm3	1.2224	7.96986	3.43518	0.0638217	0.902385
Gde1	1.06811	4.69662	3.43176	0.0639538	0.902385
Tlr6	-1.16004	4.73638	3.43341	0.0638901	0.902385
Frat1	1.8176	3.14969	3.43221	0.0639363	0.902385
Pum3	-1.10673	5.26888	3.43561	0.0638049	0.902385
Zfyve26	-1.08587	4.59645	3.42506	0.0642137	0.904868
Gorasp2	1.74912	3.63265	3.4175	0.0645086	0.907837
Ctla4	2.48523	4.98765	3.41362	0.0646604	0.907935
Cyp11a1	-2.65027	2.66554	3.41302	0.064684	0.907935
Ddr1	4.18432	0.849942	3.31791	0.0685288	0.909191
Qpct	-2.55621	2.57786	3.36493	0.0665985	0.909191
Arid4a	-1.13613	5.18246	3.35241	0.0671065	0.909191
Stxbp6	3.35387	1.68388	3.352	0.0671233	0.909191
Mfsd9	3.7424	1.41321	3.35897	0.0668399	0.909191
Jun	-1.66979	3.73215	3.34119	0.0675655	0.909191
Acsl3	3.07327	2.64695	3.35049	0.0671849	0.909191
Rwdd2a	3.37577	1.69666	3.3494	0.0672296	0.909191
Pik3r6	-1.63614	3.91298	3.33865	0.06767	0.909191
Rilpl1	-3.34012	0.793347	3.39983	0.0652032	0.909191
Gss	2.10404	5.49904	3.36688	0.0665196	0.909191
Fermt2	5.50653	1.43865	3.3642	0.066628	0.909191
Mxra8	4.05725	2.17957	3.32466	0.0682481	0.909191
Slc19a2	2.28065	2.19118	3.32556	0.0682106	0.909191
Cap2	2.99979	2.13678	3.36844	0.0664568	0.909191
Frmd8os	4.23128	1.59622	3.36687	0.06652	0.909191
Adssl1	-1.22221	4.7144	3.31771	0.0685373	0.909191
Smoc1	7.87541	1.00109	3.32428	0.0682638	0.909191
Uchl3	-1.38323	4.72511	3.33357	0.0678792	0.909191
Cdkn2c	1.68337	4.36993	3.32321	0.0683083	0.909191
Vdac1	1.05983	5.47084	3.34707	0.0673247	0.909191
Parp11	-1.21805	5.08795	3.31382	0.0686998	0.909191
Pias1	-1.09004	4.64918	3.37121	0.066345	0.909191
Hivep1	-2.01628	2.85338	3.31452	0.0686702	0.909191
Slc7a1	-2.2078	2.61899	3.36698	0.0665157	0.909191
Arhgap17	-1.26953	3.9497	3.38871	0.0656444	0.909191
Mlxipl	5.13144	2.26943	3.37893	0.0660348	0.909191
Gtpbp4	-0.914801	5.69111	3.36142	0.0667403	0.909191
Ighv5.16	-3.07122	1.33575	3.38403	0.0658309	0.909191
Zc3h12d	-1.04696	5.02085	3.34575	0.0673789	0.909191
Wdyhv1	1.63369	3.77975	3.32465	0.0682484	0.909191
Mia2	-1.31424	4.15738	3.37941	0.0660158	0.909191
Trnp1	6.16025	0.334571	3.33494	0.0678229	0.909191
Psmb7	1.16309	6.22043	3.32958	0.0680441	0.909191
Blnk	-1.20878	5.4567	3.38425	0.0658221	0.909191
Osbpl8	1.25801	6.98284	3.40732	0.0649078	0.909191
Rsad1	-3.71577	1.42209	3.37026	0.0663834	0.909191
Setbp1	-2.62203	2.21499	3.38207	0.0659093	0.909191
Eed	-1.35038	5.28576	3.3515	0.0671438	0.909191
Rtp4	-1.12519	6.63465	3.31291	0.0687375	0.909191
Cdc42ep2	-1.65435	4.20813	3.35894	0.0668409	0.909191
Ak3	1.05037	5.54809	3.38944	0.0656153	0.909191
Gga2	-1.03933	5.53999	3.34216	0.0675259	0.909191
Cd274	-1.12092	5.70433	3.3146	0.068667	0.909191
Dnaja1	-1.0846	7.04886	3.4044	0.0650227	0.909191
Tbxa2r	3.42835	2.20858	3.35793	0.066882	0.909191
Alg13	2.88821	2.09121	3.32592	0.0681959	0.909191
Cpped1	2.19456	2.85038	3.30501	0.0690691	0.912457
Tmem108	2.08336	2.66209	3.30225	0.0691853	0.912873
Cpsf7	1.2477	5.03995	3.08397	0.0790671	0.913529
Chst10	1.96553	3.62396	3.09716	0.0784288	0.913529
Plk2	-2.16153	2.99413	3.15868	0.0755241	0.913529
Mycbp2	-0.892697	6.05502	3.10957	0.0778334	0.913529
Retreg1	-0.915446	5.65252	3.2493	0.071454	0.913529
Trim21	-0.950475	5.94005	3.11632	0.0775118	0.913529
Mrpl57	1.15973	3.93939	3.10646	0.0779821	0.913529
Gnl3l	1.23476	4.23906	3.09914	0.0783338	0.913529
Nop14	-1.92566	3.00706	3.2546	0.0712233	0.913529
Utp20	-1.4517	4.01487	3.1206	0.0773083	0.913529
Fgd2	-1.01894	5.7656	3.29398	0.0695342	0.913529
Tstd3	1.28549	4.62036	3.18027	0.0745326	0.913529
Psmd7	-1.17742	5.20362	3.17976	0.0745558	0.913529
Ccdc6	-1.04786	4.45314	3.08524	0.0790056	0.913529
Srf	-1.37778	3.74756	3.10327	0.0781353	0.913529
Crispld2	2.89941	4.02902	3.1857	0.0742851	0.913529
Ifit1	-1.43781	8.90084	3.13777	0.0764985	0.913529
Aida	-0.809455	6.50275	3.2483	0.0714976	0.913529
Mpdu1	1.32293	4.87436	3.08522	0.0790067	0.913529
Atr	-0.982325	5.0316	3.1676	0.0751125	0.913529
Fbxl5	-0.99572	7.47235	3.29101	0.06966	0.913529
Maz	1.14804	4.95575	3.11616	0.0775191	0.913529
Akr1e1	2.01713	2.98242	3.17589	0.0747324	0.913529
Gatad2a	-1.10057	4.35262	3.25736	0.0711034	0.913529
Pdha1	0.81121	6.60198	3.13386	0.0766819	0.913529
Asb2	3.55497	0.825364	3.29008	0.0696997	0.913529
Ajuba	5.64495	0.727023	3.25255	0.0713125	0.913529
Tubb2a	1.53479	7.75319	3.1431	0.0762488	0.913529
Ryk	2.50369	2.5918	3.12341	0.0771751	0.913529
Dtnb	-1.39969	3.45553	3.22989	0.0723055	0.913529
Rab12	1.77177	3.48227	3.11315	0.0776624	0.913529
Ccar1	0.894747	5.72278	3.11562	0.0775452	0.913529
Prf1	-1.68503	6.35506	3.16627	0.0751739	0.913529
Wdr92	1.29806	3.95233	3.08529	0.079003	0.913529
Arg1	7.64855	4.79711	3.23391	0.0721282	0.913529
Ambp	10.1591	4.92323	3.10823	0.0778977	0.913529
Ager	-4.80949	2.27216	3.27428	0.0703738	0.913529
Tgtp2	-1.21163	9.01547	3.21275	0.0730667	0.913529
Gpd1	4.3615	2.43347	3.28069	0.0700993	0.913529
Mtf2	0.98084	4.73995	3.20271	0.0735163	0.913529
Lcp1	-0.891421	8.59861	3.09644	0.0784637	0.913529
Gfi1	3.14442	2.54436	3.15007	0.0759236	0.913529
Hormad2	4.39592	1.19109	3.16467	0.0752474	0.913529
Sirpb1c	-1.60118	5.8965	3.28815	0.0697816	0.913529
Cnr2	-0.919213	5.84372	3.14317	0.0762454	0.913529
Casp12	3.99879	1.9058	3.26819	0.0706356	0.913529
Gm39822	4.02776	0.500227	3.08863	0.0788414	0.913529
Miat	3.90708	2.45559	3.2562	0.071154	0.913529
Pank2	0.911702	5.14537	3.09935	0.0783238	0.913529
Sfxn5	-1.49007	4.361	3.18456	0.0743372	0.913529
Ang	4.71088	2.79982	3.10199	0.0781965	0.913529
Iglc1	-1.34902	6.61214	3.10379	0.0781101	0.913529
Chst3	-1.11381	6.27705	3.18883	0.0741431	0.913529
Spef1	3.83187	1.31076	3.23856	0.0719237	0.913529
Phf2	3.20432	1.47791	3.14685	0.0760738	0.913529
Igfbp6	3.68972	0.931867	3.21219	0.0730918	0.913529
Rasgef1b	-1.71929	3.18632	3.18077	0.0745094	0.913529
BC147527	-1.08854	6.10013	3.20479	0.0734229	0.913529
Dbnl	-1.0072	5.67863	3.20476	0.0734241	0.913529
Spaca9	-4.64381	1.50734	3.26532	0.0707594	0.913529
Insig2	1.56777	3.60207	3.23851	0.0719259	0.913529
Fmr1	1.09607	5.11445	3.19994	0.0736408	0.913529
Zwint	1.00941	6.73335	3.22491	0.0725258	0.913529
Ifi30	-0.953825	7.6247	3.11605	0.0775244	0.913529
Fbxo44	3.10744	1.10904	3.25605	0.0711601	0.913529
1810026B05Rik	1.01563	5.42511	3.12408	0.0771433	0.913529
Tars	-0.836336	5.48923	3.26797	0.0706448	0.913529
B4gat1	2.78693	1.78804	3.1235	0.0771711	0.913529
Tshz1	-1.84022	3.19871	3.2189	0.0727927	0.913529
Asb7	1.89077	3.23324	3.21705	0.072875	0.913529
Lyn	-0.954496	7.38641	3.09344	0.0786083	0.913529
Rbmx2	-2.05927	2.4651	3.1038	0.0781096	0.913529
Vsig10	2.70999	1.32268	3.12575	0.0770644	0.913529
Pld3	1.43236	4.77962	3.19701	0.073773	0.913529
Atg3	-0.833331	5.90003	3.08262	0.079133	0.913529
Rbm4	-2.31913	2.3898	3.24148	0.0717958	0.913529
Tifab	-1.31486	4.30755	3.19088	0.0740501	0.913529
Idh2	1.30079	4.79031	3.16555	0.0752071	0.913529
Chst15	-1.60946	4.57679	3.11224	0.0777059	0.913529
Slc43a2	1.3604	3.63809	3.11395	0.0776245	0.913529
Parp4	-1.94053	3.07849	3.19911	0.0736786	0.913529
A430093F15Rik	2.08622	2.83577	3.19387	0.0739148	0.913529
Lpcat4	4.41383	1.03423	3.23785	0.0719552	0.913529
Suv39h1	1.45831	3.65965	3.11046	0.0777908	0.913529
Adam15	-1.95837	3.61722	3.16882	0.0750565	0.913529
Gsta2	3.3782	4.20329	3.09731	0.0784217	0.913529
Phkg2	0.959367	5.0043	3.15927	0.0754971	0.913529
Tec	-0.977951	5.37366	3.18712	0.0742208	0.913529
Znrf1	1.63082	4.66066	3.16062	0.0754345	0.913529
Nfyc	1.03855	4.3773	3.10558	0.0780246	0.913529
Nrp2	3.90729	1.66236	3.29385	0.0695396	0.913529
Plac8	-1.26831	10.284	3.17824	0.0746251	0.913529
A330040F15Rik	-3.26036	2.49644	3.09231	0.0786628	0.913529
Cd5l	3.70692	7.42136	3.14558	0.0761329	0.913529
Dnajb13	3.49279	1.2154	3.27438	0.0703694	0.913529
Trmo	-1.51851	3.43395	3.09695	0.078439	0.913529
Zdhhc1	4.66586	0.861806	3.14974	0.0759388	0.913529
Gtf2i	0.941875	6.26366	3.15916	0.0755022	0.913529
Mlec	-0.877433	6.86781	3.08227	0.0791499	0.913529
Nolc1	-1.055	4.99336	3.11253	0.0776921	0.913529
Cd177	-1.57256	5.29623	3.13767	0.076503	0.913529
Sirpb1b	-1.24609	5.50997	3.08451	0.0790412	0.913529
Ndufs5	1.39999	4.17891	3.16027	0.0754505	0.913529
Stat1	-1.01812	7.59001	3.14937	0.0759565	0.913529
Ccdc125	-1.42009	4.24797	3.18501	0.0743165	0.913529
Kiz	1.68498	3.94766	3.13678	0.076545	0.913529
Pdk3	-1.1	5.9003	3.29802	0.0693634	0.913529
Csf3r	-1.38714	7.16393	3.19316	0.0739469	0.913529
Lilrb4a	-1.33784	5.60015	3.09835	0.0783716	0.913529
Atg14	1.85355	3.11395	3.10611	0.0779989	0.913529
Szrd1	-1.03936	5.13554	3.1188	0.0773937	0.913529
Malsu1	1.59923	3.76966	3.27836	0.0701991	0.913529
Maoa	5.68011	1.08122	3.21119	0.0731363	0.913529
Adcy6	2.1701	3.07183	3.13566	0.0765972	0.913529
Sh3pxd2b	5.57345	1.26203	3.22921	0.0723354	0.913529
Vrk1	-0.966081	5.65101	3.18916	0.074128	0.913529
Nop58	-0.977945	5.82204	3.13684	0.0765421	0.913529
Cd300ld	-1.05472	7.15618	3.078	0.0793581	0.913975
Gria3	4.54369	0.793476	3.0795	0.079285	0.913975
Col1a2	6.5718	0.782444	3.06825	0.0798355	0.918492
Fcmr	-0.989664	7.12177	3.0646	0.0800148	0.919573
Fcer2a	-1.71976	5.42834	3.06265	0.0801112	0.919667
Gm12276	-3.2401	0.995303	3.0558	0.0804495	0.919667
Dennd1a	-2.69143	1.57409	3.05866	0.0803079	0.919667
Slc25a46	1.06678	5.06597	3.05693	0.0803934	0.919667
Ndufa10	1.03781	6.32304	3.05813	0.0803338	0.919667
Acer3	-0.998565	5.311	3.04816	0.0808286	0.922045
Lpcat2	-1.00518	5.73228	3.04871	0.0808011	0.922045
Nudcd1	-1.8185	3.54502	3.04412	0.0810302	0.922518
Gm15710	-1.56018	2.78309	3.0439	0.0810412	0.922518
Pirb	-0.99952	7.83427	3.03213	0.081631	0.923381
Exosc9	0.992086	5.26388	3.03389	0.0815423	0.923381
Igsf6	-1.00437	7.36718	3.03424	0.0815246	0.923381
Mgam	-2.13463	3.02351	3.03581	0.0814459	0.923381
Cmtr2	-1.73704	3.0273	3.03799	0.0813366	0.923381
Vps29	0.883441	5.68831	3.03361	0.0815565	0.923381
Bag6	1.43098	3.99186	3.02522	0.0819793	0.926349
Gm11808	-1.89475	4.74444	3.01559	0.0824676	0.926832
Pi16	-1.40214	4.71714	3.0142	0.082538	0.926832
Tbc1d2b	-0.88855	6.23753	3.01575	0.0824595	0.926832
Trib3	-3.05511	1.02169	3.01987	0.08225	0.926832
Rgl2	-1.37955	4.82965	3.0194	0.0822737	0.926832
Desi1	2.21703	3.53511	3.01658	0.082417	0.926832
Trbv17	2.71337	2.87194	3.00454	0.0830314	0.929518
Knop1	-1.16902	4.78566	2.99561	0.0834903	0.929518
Rnf170	1.23411	3.87416	2.99835	0.0833496	0.929518
Rps6kb1	0.942888	5.56716	3.00241	0.0831406	0.929518
Gm16174	4.3946	0.555873	2.99676	0.0834311	0.929518
Fam60a	2.0738	3.66917	2.99613	0.0834636	0.929518
Card11	-1.69221	3.785	2.99957	0.0832865	0.929518
Nploc4	1.00106	5.46471	3.00738	0.0828861	0.929518
Gm4285	3.3842	1.88407	2.9944	0.0835531	0.929518
Chm	-1.44262	4.28261	2.98173	0.0842092	0.930265
Nod1	-1.15702	5.90444	2.98864	0.0838505	0.930265
Sgpp1	0.965964	5.59648	2.98144	0.0842244	0.930265
Gm45418	3.53412	1.38886	2.98755	0.0839071	0.930265
Prkcd	-0.916767	7.09391	2.98444	0.0840682	0.930265
Cep97	1.41252	4.34594	2.98256	0.084166	0.930265
Il1b	-1.46494	8.17508	2.98831	0.0838674	0.930265
Bend6	-3.88544	0.846958	2.97526	0.0845465	0.93145
Herc6	-1.50803	6.26532	2.97673	0.0844695	0.93145
Ccdc93	1.00909	4.74397	2.97441	0.0845909	0.93145
Ighv1.9	-3.22735	2.14294	2.95828	0.0854387	0.934106
C1ra	5.08906	2.94807	2.96318	0.0851802	0.934106
Dstn	1.953	7.7424	2.96163	0.0852621	0.934106
5430425K12Rik	5.47389	0.996605	2.96046	0.0853238	0.934106
Hmgcs1	1.34211	4.87113	2.96575	0.0850449	0.934106
Nfkbid	-1.29331	4.36743	2.95967	0.0853652	0.934106
Nfyb	1.01817	4.98914	2.96608	0.0850275	0.934106
Gatad1	1.42505	7.05376	2.95091	0.085829	0.935926
Pus7	-2.06904	3.25753	2.94503	0.0861419	0.935926
Gapt	-2.35058	2.476	2.9437	0.0862129	0.935926
Klra1	-1.68376	3.81135	2.9452	0.0861328	0.935926
Gpc3	5.56949	1.34152	2.94407	0.0861935	0.935926
Wdr41	-1.46068	4.18757	2.94791	0.0859888	0.935926
Calr	-0.985665	6.94886	2.95031	0.085861	0.935926
Snhg8	1.49909	2.93702	2.93541	0.0866567	0.936181
S100a13	1.03444	6.81467	2.93909	0.0864595	0.936181
Bag3	2.09683	2.50805	2.93532	0.0866613	0.936181
Ints12	-1.02959	4.85337	2.93885	0.0864725	0.936181
Mlxip	-1.06689	5.13	2.93515	0.0866706	0.936181
Dmpk	5.43414	0.735834	2.93301	0.0867854	0.936483
Ncapg	-1.78901	4.27799	2.92628	0.0871482	0.937582
Irs2	2.73685	2.40072	2.92874	0.0870156	0.937582
Tnks	1.1087	4.42129	2.92657	0.0871326	0.937582
Mnat1	1.77946	3.69367	2.92115	0.0874254	0.937875
Rars2	-1.15723	4.1723	2.92401	0.087271	0.937875
Ripk1	-0.833999	6.3036	2.92095	0.0874364	0.937875
Klf6	-0.982697	7.36322	2.91813	0.0875892	0.938013
Sumf1	-1.25923	4.44605	2.9175	0.0876233	0.938013
Dip2c	3.46451	1.46518	2.91437	0.0877939	0.938907
Zkscan3	0.969283	5.39657	2.90825	0.0881276	0.939527
Ganc	-0.983007	4.48783	2.90761	0.0881622	0.939527
Pde5a	1.67739	5.3051	2.90595	0.088253	0.939527
Mvp	-1.33601	5.90256	2.90887	0.0880937	0.939527
Zeb2	-0.947171	5.97833	2.90532	0.0882876	0.939527
Ranbp9	0.767095	6.06225	2.89825	0.0886757	0.940886
Fam76a	1.64462	3.67026	2.89728	0.0887293	0.940886
Igkv1.117	-2.60744	1.6268	2.89664	0.0887644	0.940886
Myo1f	-1.05721	7.15882	2.90102	0.0885234	0.940886
Chfr	0.748731	5.72585	2.88514	0.0894002	0.946132
Uba7	-1.026	6.89025	2.88451	0.0894349	0.946132
Prpf38a	-1.16014	5.27602	2.8824	0.0895526	0.946448
Dst	2.99993	0.941446	2.87963	0.0897068	0.947149
Tpx2	1.04091	5.27472	2.87486	0.0899726	0.947901
Med14	1.12088	4.51131	2.87529	0.089949	0.947901
Irak3	-0.997112	5.11792	2.87363	0.0900418	0.947901
Pikfyve	-1.05622	5.08753	2.86462	0.0905469	0.948129
Zfp869	-0.982493	5.12997	2.85843	0.0908959	0.948129
Mgmt	2.21263	2.03905	2.86005	0.0908046	0.948129
Tspoap1	-3.34501	1.22218	2.85498	0.0910913	0.948129
Ighv8.12	-3.01585	1.68654	2.85771	0.090937	0.948129
Tmem229b	-0.744621	5.65346	2.85423	0.0911337	0.948129
Stk10	-0.791696	6.73	2.86604	0.0904671	0.948129
Snx33	2.21396	2.14289	2.85972	0.090823	0.948129
Fah	3.33176	3.60496	2.86052	0.0907782	0.948129
Serping1	5.97551	4.40868	2.85294	0.0912068	0.948129
Marco	4.49245	6.66855	2.85601	0.0910329	0.948129
Fbxw9	3.59913	1.28902	2.86584	0.0904782	0.948129
Grhpr	2.96142	2.28424	2.86628	0.0904536	0.948129
Fgd4	-1.15415	4.89271	2.84958	0.0913976	0.948283
Gm18752	-4.06996	1.49164	2.84965	0.091394	0.948283
Renbp	2.16306	2.63493	2.84428	0.0916998	0.949591
Fbxl3	0.983744	6.09816	2.84559	0.0916248	0.949591
Kcnn4	1.09655	4.89096	2.84163	0.0918508	0.950241
A530072M11Rik	-4.43438	1.09844	2.83993	0.0919484	0.950339
Dnajc16	1.83795	2.4547	2.82394	0.092868	0.951611
Zfp821	-1.1839	3.60551	2.83062	0.0924824	0.951611
Ogfrl1	-1.37602	6.81256	2.82706	0.0926878	0.951611
Tspan4	2.43883	2.48908	2.82245	0.0929542	0.951611
Gm15922	-2.0559	2.86216	2.82335	0.0929024	0.951611
BC017643	-0.817194	6.87267	2.8245	0.092836	0.951611
Gvin1	-1.63222	6.96999	2.83035	0.0924984	0.951611
Il4ra	-0.875563	6.655	2.83534	0.0922114	0.951611
Gmppb	-1.72993	3.89102	2.82354	0.092891	0.951611
Cdk9	-0.941843	5.35793	2.8291	0.09257	0.951611
Ppwd1	-1.68158	3.64479	2.76674	0.0962422	0.951967
Cd302	2.04252	4.70691	2.79462	0.0945813	0.951967
Sfi1	-1.3562	3.98481	2.77618	0.0956763	0.951967
1700097N02Rik	2.88806	1.88247	2.78974	0.0948697	0.951967
BC065403	4.54345	1.67728	2.76394	0.0964108	0.951967
Madd	-0.986682	5.46586	2.76126	0.0965719	0.951967
Wbp11	2.36619	2.21574	2.78738	0.0950094	0.951967
Trpm2	-1.3557	4.74185	2.78267	0.0952891	0.951967
Naip5	-1.21985	5.14827	2.76656	0.0962526	0.951967
Samd3	-1.6626	3.83528	2.79671	0.0944582	0.951967
Taf4	2.25311	2.13865	2.80015	0.0942555	0.951967
Ms4a6d	-1.20066	6.20997	2.78855	0.0949401	0.951967
Tgif1	-0.929498	4.97517	2.81731	0.0932524	0.951967
Gbp8	-1.05671	5.82127	2.77593	0.0956908	0.951967
Nudt1	2.08876	3.19094	2.7811	0.0953825	0.951967
Churc1	1.30808	3.54043	2.76569	0.0963049	0.951967
Kptn	-1.36397	3.44212	2.80319	0.0940772	0.951967
Cdk5r1	-3.1061	0.837866	2.7612	0.0965759	0.951967
Vars	-0.974237	5.54404	2.80655	0.0938799	0.951967
Nlrp3	-2.7958	2.17586	2.7767	0.095645	0.951967
Trbv13.1	1.50902	3.20237	2.78434	0.0951897	0.951967
Oas3	-1.34409	7.12369	2.77363	0.0958284	0.951967
Anp32e	1.37053	7.0375	2.79274	0.0946924	0.951967
Arglu1	0.928938	6.51417	2.77187	0.0959342	0.951967
Elp2	-1.06278	5.2422	2.80609	0.0939069	0.951967
Gpr27	-4.11697	0.159328	2.77327	0.0958505	0.951967
Chchd7	1.43103	3.75912	2.76244	0.0965007	0.951967
Atp5j2	1.1149	7.56633	2.79505	0.0945556	0.951967
Dync1li2	0.780509	5.35858	2.78365	0.0952307	0.951967
Dennd4b	-1.66081	3.47333	2.77464	0.0957681	0.951967
Rfxank	-1.22731	4.40463	2.77077	0.0960002	0.951967
Ly6g6f	1.9456	4.34445	2.80187	0.0941541	0.951967
Mre11a	-1.15205	4.56097	2.77099	0.0959868	0.951967
Urm1	1.17768	4.32457	2.76338	0.0964443	0.951967
Serpina3f	-1.56996	5.97168	2.7687	0.0961241	0.951967
Glmn	1.68072	3.31343	2.79282	0.0946876	0.951967
Slc39a8	3.09638	1.73189	2.76064	0.0966096	0.951967
Cbl	1.31036	4.15861	2.81601	0.0933282	0.951967
Cysltr2	2.49846	4.06386	2.81829	0.0931956	0.951967
Kifap3	3.41588	1.89645	2.79666	0.094461	0.951967
Camkk1	3.36102	2.18137	2.7894	0.09489	0.951967
Upk3b	5.03568	2.06656	2.75891	0.0967143	0.952128
Car1	3.37505	3.81247	2.74223	0.097728	0.954936
Ddx18	-1.34983	3.46035	2.74491	0.0975646	0.954936
Lcor	1.85473	3.98925	2.74787	0.0973841	0.954936
Celsr1	-2.91988	0.916933	2.74619	0.0974868	0.954936
Cd72	-0.95214	5.81725	2.74055	0.0978312	0.954936
Art4	2.95839	4.63385	2.73962	0.0978882	0.954936
Atp6v0b	-1.09502	4.68862	2.73822	0.0979739	0.954936
Rab23	-2.74486	1.09409	2.74661	0.0974612	0.954936
Stt3a	-0.771826	6.17607	2.74863	0.097338	0.954936
Nlrp1a	-2.50663	2.85842	2.73929	0.0979083	0.954936
Rap1a	1.09518	8.03306	2.74464	0.097581	0.954936
Slc15a4	-0.830143	5.31025	2.72863	0.0985638	0.955799
Gm27252	5.45586	1.0007	2.72937	0.0985182	0.955799
Utp4	-1.20428	4.71442	2.72975	0.0984946	0.955799
Pfkp	-1.0329	7.04133	2.72813	0.0985945	0.955799
Milr1	-1.09503	4.98811	2.73041	0.0984541	0.955799
Nbas	-1.0498	3.95789	2.73085	0.0984266	0.955799
Tmem106a	-1.45175	3.86955	2.72537	0.0987653	0.956313
Napsa	-0.913696	7.45026	2.72297	0.0989136	0.956313
Gm14862	5.25355	2.93123	2.7234	0.0988873	0.956313
Oasl2	-1.53078	9.58328	2.71907	0.0991558	0.957795
Shc1	-0.829855	5.51231	2.71183	0.0996068	0.957796
Acaa1a	-1.05516	5.2695	2.70909	0.0997778	0.957796
Ppp1r3d	-1.72664	3.83431	2.71002	0.0997197	0.957796
Oip5	1.5726	3.9657	2.71375	0.0994868	0.957796
F11r	1.51736	3.74364	2.71243	0.099569	0.957796
Mrm2	2.55386	1.71582	2.71263	0.0995568	0.957796
Lmnb1	-1.66058	4.68975	2.71352	0.0995011	0.957796
Mpc1	1.08436	4.814	2.70351	0.100127	0.959642
Tnfsf8	-1.91006	3.41833	2.70318	0.100148	0.959642
Nup37	-1.48911	3.42894	2.69592	0.100605	0.959755
Ndufb6	1.16851	5.3194	2.6987	0.10043	0.959755
Hsp90aa1	-1.01572	8.64495	2.69672	0.100555	0.959755
Nr2c2	0.880139	5.74976	2.7008	0.100298	0.959755
Mov10	-1.90765	3.21457	2.69681	0.100549	0.959755
Dhrs1	1.02997	5.03008	2.64727	0.103728	0.959933
Slc24a5	3.20602	1.27671	2.6851	0.101291	0.959933
Cnn3	1.38486	5.80296	2.60838	0.106301	0.959933
Smim15	0.928165	5.63148	2.67123	0.102177	0.959933
Ighv1.18	-2.51876	1.88906	2.64955	0.103579	0.959933
Tspyl4	1.94119	2.92117	2.64199	0.104073	0.959933
Taf1d	0.991084	5.53512	2.64558	0.103838	0.959933
Gm10101	4.12967	1.31378	2.65729	0.103076	0.959933
Ttl	2.71129	1.78809	2.61946	0.10556	0.959933
Pes1	-0.952367	6.01646	2.65826	0.103013	0.959933
Ubqln2	3.93748	1.96679	2.67735	0.101785	0.959933
Igkc	-0.936403	6.66012	2.62628	0.105108	0.959933
Mtm1	-1.2364	3.62011	2.61937	0.105566	0.959933
Mxd1	-1.1476	6.69856	2.67583	0.101882	0.959933
Fam216a	2.03489	2.59081	2.61369	0.105945	0.959933
Cacna1s	2.54635	1.83944	2.68804	0.101104	0.959933
Gm6712	3.27798	1.95159	2.66154	0.102801	0.959933
Neurl1b	3.25099	1.02647	2.69207	0.100849	0.959933
2011-09-01	-0.886826	5.7124	2.62177	0.105407	0.959933
Trbv12.2	2.62476	3.03417	2.62337	0.1053	0.959933
Atp2b1	-0.856717	6.11517	2.60972	0.10621	0.959933
Ppp4r1	-0.86664	5.39452	2.60792	0.106331	0.959933
Rad50	-0.954193	4.68993	2.65043	0.103522	0.959933
Cald1	1.65942	6.09396	2.64778	0.103695	0.959933
Eml4	-0.895082	5.88553	2.65594	0.103164	0.959933
Gm32585	-3.8588	1.26457	2.65736	0.103072	0.959933
Ascc1	2.82026	1.90186	2.67739	0.101782	0.959933
Sh2d2a	1.59344	4.15264	2.6695	0.102288	0.959933
Stx6	1.07237	5.08728	2.61163	0.106083	0.959933
Trem2	2.98118	2.29181	2.62967	0.104884	0.959933
Eif4e3	2.57255	1.81248	2.64283	0.104018	0.959933
Fkbp4	-1.03525	5.7554	2.65063	0.103509	0.959933
Slc37a4	1.41832	3.94632	2.60672	0.106412	0.959933
Rpl6l	1.54265	2.27952	2.65421	0.103276	0.959933
Spsb3	0.988417	5.52624	2.62565	0.10515	0.959933
Kctd10	-0.732767	5.98891	2.62421	0.105245	0.959933
Csf2ra	-1.48165	3.08188	2.6308	0.104809	0.959933
Gpm6a	3.61205	0.827131	2.65136	0.103461	0.959933
Fam129c	-1.27734	4.01615	2.64512	0.103868	0.959933
Il4	-2.80229	1.89135	2.65832	0.10301	0.959933
Rps3a2	-1.4373	2.74618	2.62384	0.105269	0.959933
Anapc10	1.50839	3.58559	2.63681	0.104413	0.959933
Zfp106	-0.881222	6.17277	2.61794	0.105661	0.959933
6720427I07Rik	1.87084	3.02653	2.65277	0.10337	0.959933
Platr17	-2.92239	1.54159	2.65733	0.103074	0.959933
Mrps12	1.69034	2.82056	2.65779	0.103044	0.959933
Rnd3	-2.10157	2.89425	2.69372	0.100745	0.959933
Clec1b	1.8112	8.42619	2.61138	0.106099	0.959933
Hsph1	-1.04095	5.90523	2.64086	0.104147	0.959933
Atp5g3	0.925646	6.06872	2.60764	0.10635	0.959933
Cd74	-1.13652	5.86196	2.6747	0.101955	0.959933
Sbno1	-0.909261	5.55911	2.67617	0.10186	0.959933
Guk1	1.10579	4.32498	2.60761	0.106352	0.959933
Smg8	-1.17363	3.94385	2.62324	0.105309	0.959933
Reep3	-1.02537	4.60004	2.66219	0.102759	0.959933
Gpm6b	-2.56058	2.49545	2.63629	0.104447	0.959933
Spib	-0.973101	6.23329	2.62623	0.105111	0.959933
Atp11c	1.07521	4.78539	2.68815	0.101097	0.959933
Fancg	1.51947	2.91693	2.66129	0.102817	0.959933
Sirt5	3.21785	1.7293	2.6093	0.106239	0.959933
Ipo13	2.71309	1.88159	2.61728	0.105705	0.959933
R3hcc1	2.0064	2.44207	2.63439	0.104572	0.959933
Cdk13	1.21376	4.42533	2.64161	0.104098	0.959933
Kdm5c	-1.09302	4.92808	2.67379	0.102013	0.959933
Iglj3p	-4.95708	1.44058	2.61856	0.10562	0.959933
mt.Cytb	1.40507	9.73915	2.57142	0.10881	0.960259
Tppp3	-1.42776	5.59608	2.60147	0.106765	0.960259
Creb3	-0.887821	5.41151	2.56385	0.109332	0.960259
Ckap2l	2.42951	3.30492	2.57675	0.108444	0.960259
Dtwd1	-2.05542	2.16926	2.56747	0.109082	0.960259
Dgke	1.64787	3.76046	2.59627	0.107116	0.960259
Bckdhb	2.28545	2.76096	2.56659	0.109143	0.960259
Cracr2a	2.09952	2.87986	2.57581	0.108509	0.960259
Gm10076	-2.11492	7.68092	2.57584	0.108506	0.960259
Rdh13	-1.70046	2.71601	2.57263	0.108727	0.960259
Aldob	10.8884	5.99269	2.56833	0.109023	0.960259
Ngp	3.17176	4.87423	2.59256	0.107367	0.960259
Lins1	-1.54586	2.84385	2.57177	0.108786	0.960259
Acoxl	3.15013	1.07991	2.56691	0.109121	0.960259
H2.DMa	-0.905168	6.78049	2.57028	0.108888	0.960259
Nktr	-1.05523	5.29205	2.58595	0.107816	0.960259
Pmp22	3.24144	3.31815	2.56781	0.109059	0.960259
af1	-1.0136	7.49892	2.60061	0.106822	0.960259
Abracl	1.14015	6.31062	2.57195	0.108774	0.960259
Epor	3.46688	1.22501	2.59399	0.10727	0.960259
3110062M04Rik	2.04573	2.4258	2.58818	0.107664	0.960259
Zfp341	2.89346	1.62925	2.5912	0.107459	0.960259
Eif4enif1	0.99336	4.38848	2.56809	0.109039	0.960259
1110008P14Rik	1.23575	3.86545	2.58011	0.108214	0.960259
Arf2	0.813368	5.69395	2.57818	0.108346	0.960259
Hsd17b4	0.820549	5.3529	2.58664	0.107769	0.960259
Zfp652	-1.34591	4.02253	2.5632	0.109377	0.960259
Mrps35	-1.05725	4.36139	2.60179	0.106743	0.960259
Ifnar2	-0.849271	5.80674	2.59866	0.106954	0.960259
Pnrc1	0.817116	5.31991	2.59128	0.107453	0.960259
Svil	-1.02208	5.18742	2.58565	0.107836	0.960259
Ghr	6.14267	1.99144	2.56213	0.109451	0.960259
Babam1	0.890508	4.53283	2.56176	0.109477	0.960259
Pcif1	-0.998035	3.95839	2.5889	0.107615	0.960259
Psmd9	1.77284	3.31644	2.55706	0.109803	0.962079
Clns1a	0.807442	5.47985	2.55363	0.110041	0.962079
Arap3	-1.70419	3.10182	2.55391	0.110021	0.962079
BC043934	2.24196	2.43494	2.55468	0.109968	0.962079
Aars2	2.42626	2.13016	2.5481	0.110427	0.963976
Fbxo5	2.23662	3.44897	2.54796	0.110437	0.963976
Tor1aip1	-0.807365	5.9428	2.54302	0.110783	0.96465
Hexim2	2.02386	1.90633	2.54346	0.110752	0.96465
Map3k15	-1.36928	3.90197	2.54334	0.110761	0.96465
Heatr1	-1.03984	5.0472	2.53753	0.111169	0.966546
Klhl28	1.27714	4.12864	2.53737	0.11118	0.966546
Ifi44	-1.64492	5.49152	2.53285	0.111499	0.968539
Cyb5r1	-1.22094	5.18158	2.52845	0.11181	0.970458
Stoml1	-1.12576	4.58672	2.52369	0.112148	0.970882
Zfp605	-3.16821	2.14867	2.52582	0.111996	0.970882
Ctsg	-5.88957	0.726442	2.52269	0.112219	0.970882
Gm5547	1.6185	3.49893	2.52297	0.112199	0.970882
Dnajc15	1.1229	6.24901	2.52027	0.112392	0.971551
Hsf2	2.13308	2.97758	2.51732	0.112602	0.971551
Igtp	-0.862633	8.9983	2.51655	0.112657	0.971551
Cldn12	4.86033	1.15289	2.51666	0.112649	0.971551
Plod3	-1.05822	4.94609	2.51523	0.112751	0.971588
Gpr137	1.42178	2.92209	2.49542	0.114178	0.972268
Cwc27	-1.40742	3.7305	2.49628	0.114116	0.972268
Cmc2	1.60106	3.05197	2.49788	0.114	0.972268
Mccc2	1.80592	2.76337	2.50234	0.113677	0.972268
Csf1r	-0.997808	7.69972	2.5082	0.113255	0.972268
Cbr2	3.54587	2.32052	2.48721	0.114775	0.972268
mt.Co3	1.63219	2.94759	2.48667	0.114814	0.972268
Scamp3	1.83033	2.30111	2.50281	0.113643	0.972268
Zfp945	1.01052	5.00922	2.49252	0.114388	0.972268
Vangl1	2.3367	4.86061	2.49463	0.114235	0.972268
Gripap1	-0.997022	5.1481	2.49956	0.113878	0.972268
Rbm12b2	-1.53945	3.76885	2.49317	0.114341	0.972268
Pald1	3.17927	1.87133	2.51151	0.113018	0.972268
Ssh2	-0.833901	5.84594	2.49318	0.114341	0.972268
Skil	-1.06989	5.05846	2.48802	0.114716	0.972268
Akr7a5	2.16447	2.62203	2.49485	0.114219	0.972268
Vamp2	2.05101	2.50719	2.49003	0.114569	0.972268
D3Ertd751e	1.89911	2.78374	2.5015	0.113738	0.972268
Afap1l1	2.29502	3.17535	2.49031	0.114549	0.972268
Gpn1	-1.00097	4.46595	2.50093	0.113779	0.972268
Bcl11b	1.33052	4.23221	2.48811	0.114709	0.972268
Tmem127	-0.865183	6.2218	2.49796	0.113994	0.972268
Bet1l	0.917479	4.60672	2.47056	0.115997	0.972903
Atf6	-0.938648	5.71749	2.43151	0.118918	0.972903
Zfp790	-1.49783	3.42792	2.43516	0.118642	0.972903
mt.Nd2	1.43013	6.52763	2.4316	0.118911	0.972903
Ccl25	2.06378	1.93865	2.41999	0.119796	0.972903
B430306N03Rik	-1.04393	4.38747	2.46394	0.116486	0.972903
Sparc	5.49979	2.37959	2.48082	0.115242	0.972903
Slamf1	1.50615	6.49977	2.41787	0.119958	0.972903
Cand1	-0.783096	5.98647	2.4416	0.118155	0.972903
Tbc1d31	-1.47195	3.31973	2.46892	0.116117	0.972903
Serpina3g	-1.12591	8.0042	2.45352	0.117261	0.972903
Klre1	-1.2175	5.23921	2.42567	0.119362	0.972903
Nedd9	-0.802663	6.63904	2.44102	0.118199	0.972903
Map3k19	-2.46071	2.28675	2.42349	0.119528	0.972903
Iars2	0.774772	5.38562	2.44073	0.118221	0.972903
Ptprf	6.95406	1.1611	2.42356	0.119523	0.972903
Bhlhb9	1.93181	2.75863	2.45279	0.117316	0.972903
Dpp8	0.744328	6.18105	2.46491	0.116414	0.972903
Nfe2l2	-0.747768	6.36511	2.4431	0.118043	0.972903
Selplg	-0.898939	7.02105	2.44249	0.118089	0.972903
Sh2b2	-2.4768	2.03981	2.46068	0.116728	0.972903
Itga9	3.85194	1.92386	2.43209	0.118874	0.972903
Wdr43	-0.780498	5.79352	2.48169	0.115178	0.972903
Tbck	-1.0088	3.78883	2.42256	0.119599	0.972903
Rundc3a	4.05445	3.96008	2.43419	0.118715	0.972903
Alyref2	-2.08764	1.66991	2.41688	0.120033	0.972903
Zxdb	2.13157	2.23814	2.46672	0.11628	0.972903
Ptger4	0.977967	4.09777	2.47833	0.115425	0.972903
C4b	2.91297	7.43076	2.44829	0.117653	0.972903
Zfp687	-1.64048	2.415	2.46214	0.11662	0.972903
Camk2b	2.79054	0.748627	2.45309	0.117294	0.972903
Btd	1.83074	3.29559	2.46988	0.116047	0.972903
Wrn	0.940364	4.81901	2.43948	0.118315	0.972903
Cklf	-1.15451	3.9892	2.44176	0.118144	0.972903
Rai1	2.39585	1.98229	2.43344	0.118772	0.972903
Fus	2.88342	1.54378	2.47288	0.115825	0.972903
Coq2	-0.904708	4.77211	2.41767	0.119973	0.972903
Tmcc1	-0.807796	5.46764	2.4248	0.119428	0.972903
Bach2	-1.27096	3.51166	2.45939	0.116824	0.972903
Gm28661	1.53673	4.27133	2.44538	0.117871	0.972903
Tbc1d9	-1.47722	3.28355	2.4286	0.119139	0.972903
Cfap43	-0.996435	4.96606	2.4176	0.119979	0.972903
C5ar2	-2.84003	1.46402	2.42876	0.119127	0.972903
Tgfbr2	-0.732382	7.06959	2.43602	0.118577	0.972903
lr	4.54097	1.49713	2.44033	0.118252	0.972903
Smo	4.03339	1.47783	2.41994	0.119799	0.972903
Cd19	-0.872254	7.667	2.46083	0.116717	0.972903
Actn1	1.37992	5.0018	2.4439	0.117983	0.972903
Thrsp	7.58038	2.96872	2.46441	0.116452	0.972903
Rpl22l1	0.827771	7.16592	2.44622	0.117808	0.972903
Depdc1b	2.73875	2.4527	2.45561	0.117106	0.972903
Hk2	-1.6526	3.46732	2.43373	0.11875	0.972903
Nat8l	2.53098	1.62958	2.43108	0.118951	0.972903
Lysmd4	2.19303	2.28133	2.44886	0.11761	0.972903
Psme2b	-1.25208	4.21906	2.48185	0.115166	0.972903
Agap1	-2.23617	1.22998	2.43496	0.118657	0.972903
Oas2	-1.61992	4.86528	2.42053	0.119754	0.972903
Klhl20	1.83955	3.01526	2.41533	0.120153	0.973136
Prmt2	-1.95393	2.25013	2.40977	0.12058	0.97452
Sycp2	1.93434	2.28648	2.41046	0.120527	0.97452
Sfn	-1.70011	3.01014	2.40958	0.120595	0.97452
Sfr1	0.890099	5.10305	2.38828	0.122248	0.975659
Pex3	1.65001	3.41812	2.38561	0.122457	0.975659
Psmc5	0.896309	6.01795	2.40622	0.120854	0.975659
Prkab1	0.903066	4.88159	2.39452	0.121761	0.975659
Txndc11	0.926187	4.20042	2.39407	0.121796	0.975659
Scoc	1.56267	5.36017	2.38734	0.122321	0.975659
Gmeb1	-1.35438	3.66344	2.38861	0.122222	0.975659
Cdk17	0.970099	5.45352	2.39058	0.122068	0.975659
Mb21d1	-1.87709	2.50545	2.38975	0.122133	0.975659
Aqp9	-1.39105	5.94559	2.39963	0.121364	0.975659
Sdccag8	-1.10609	4.59537	2.38989	0.122122	0.975659
Gnmt	6.29906	3.57652	2.37757	0.123089	0.975659
Tgm2	-1.21388	6.1053	2.38435	0.122556	0.975659
Paqr8	-2.66542	1.37356	2.38071	0.122842	0.975659
Btbd11	2.87816	2.13934	2.37837	0.123026	0.975659
Ica1	3.71754	1.19709	2.38502	0.122504	0.975659
Ip6k3	-2.88334	1.58316	2.39626	0.121626	0.975659
Pf4	1.68648	9.78342	2.40018	0.121321	0.975659
Cmtr1	2.17154	2.2124	2.37942	0.122943	0.975659
Rnf40	-0.810299	5.36773	2.38738	0.122319	0.975659
Nedd4l	2.01778	2.64306	2.38098	0.122821	0.975659
Cblb	1.2577	4.11477	2.38216	0.122727	0.975659
Rint1	1.3672	3.39713	2.38738	0.122318	0.975659
Mfap1b	0.925646	4.85665	2.3987	0.121436	0.975659
Bst2	-1.09847	6.4733	2.38497	0.122507	0.975659
Msrb1	-0.844865	7.14359	2.38444	0.122549	0.975659
Pafah2	2.59373	2.67807	2.37322	0.123432	0.976088
Lrrc29	2.09396	2.42392	2.35909	0.124555	0.976088
Aqr	-0.755543	5.77554	2.3575	0.124682	0.976088
Tuba4a	1.61447	9.41944	2.37228	0.123506	0.976088
Prr11	2.9604	1.44374	2.35895	0.124566	0.976088
Thnsl1	2.45196	2.08112	2.36203	0.124321	0.976088
Kantr	-2.91214	1.61444	2.36064	0.124431	0.976088
Uso1	0.927309	5.33463	2.36879	0.123783	0.976088
Skp1a	0.861838	7.61542	2.36322	0.124225	0.976088
Klhl21	1.22587	3.83446	2.36144	0.124368	0.976088
Fam234b	2.89443	2.16781	2.36515	0.124072	0.976088
Kdsr	1.28597	3.63249	2.35798	0.124644	0.976088
A930002I21Rik	4.34372	1.73455	2.36514	0.124072	0.976088
Cep85l	-2.14732	2.48599	2.36375	0.124184	0.976088
Gstt2	1.37731	3.61469	2.37496	0.123295	0.976088
Tyrobp	-0.976161	9.18418	2.36475	0.124104	0.976088
Cep63	-0.966791	4.56458	2.36136	0.124374	0.976088
Sin3b	0.978357	7.76226	2.35451	0.124921	0.977249
Slc36a3os	3.12202	1.92326	2.35335	0.125014	0.977267
Eri2	1.71878	2.8464	2.35007	0.125278	0.978618
F7	3.2354	2.62113	2.34545	0.125649	0.980098
Ssx2ip	1.37762	3.97095	2.34651	0.125564	0.980098
Hook3	1.00251	4.89484	2.34315	0.125835	0.98041
Dnajc19	1.11257	4.36128	2.3427	0.125871	0.98041
Nphp1	3.48819	0.909508	2.34057	0.126043	0.981043
Kctd18	1.24315	3.81639	2.33603	0.126411	0.982813
Mrpl20	0.956315	6.12608	2.3344	0.126544	0.982813
Slc25a47	6.00499	3.03163	2.33495	0.126499	0.982813
Bri3	-1.61891	2.12175	2.33222	0.126721	0.983482
Rpl14.ps1	-1.31952	2.75517	2.32907	0.126977	0.983613
Ttc7	-0.97669	5.34639	2.32865	0.127012	0.983613
Ing1	0.773814	5.13417	2.33053	0.126858	0.983613
Rbm18	0.948966	4.94413	2.32663	0.127177	0.984185
Socs3	-1.18539	5.19029	2.32358	0.127426	0.985406
Ndufv3	1.0169	5.70515	2.31913	0.127791	0.986812
Adam10	0.93024	6.89469	2.31969	0.127746	0.986812
Lrig2	1.54626	3.88395	2.31788	0.127895	0.986903
Gm16124	1.66082	2.66634	2.31255	0.128334	0.987464
Mst1r	4.4572	1.12448	2.31527	0.128109	0.987464
Cdt1	1.87001	2.45894	2.31437	0.128183	0.987464
Aco1	1.12603	4.78714	2.3136	0.128247	0.987464
Mrpl50	1.1098	3.87002	2.31005	0.12854	0.988343
Pitpnm1	-1.15999	4.40414	2.30706	0.128788	0.988623
Rab44	-1.24062	4.42534	2.30787	0.12872	0.988623
Aldh1a2	-3.60471	0.87161	2.30519	0.128943	0.988623
Clcn7	-1.24427	3.74376	2.30534	0.12893	0.988623
Tmem208	-1.07168	4.56778	2.30389	0.12905	0.988743
Ambra1	-1.12335	4.28055	2.30174	0.129229	0.988772
Gm15675	-1.07114	5.94465	2.30137	0.12926	0.988772
Basp1	-2.01956	2.8369	2.29853	0.129496	0.988772
Sik1	-1.53003	2.98625	2.29917	0.129443	0.988772
Scimp	-1.17939	3.60863	2.29834	0.129513	0.988772
Mturn	1.11804	4.12841	2.28502	0.130628	0.99041
Taf2	1.03968	3.6289	2.29443	0.129838	0.99041
Haus2	1.22396	3.55111	2.28887	0.130305	0.99041
Cnot6	0.878322	6.23081	2.28954	0.130249	0.99041
Kdm3a	0.816119	5.73783	2.28661	0.130495	0.99041
Card6	-1.11228	4.03189	2.28481	0.130646	0.99041
Lypd6b	2.41259	2.39726	2.2892	0.130277	0.99041
Cited2	-1.83221	2.88138	2.28798	0.130379	0.99041
Usf1	-0.875535	5.79255	2.28524	0.13061	0.99041
Mtmr14	0.839191	5.8347	2.28869	0.13032	0.99041
Ube4b	1.14932	4.09964	2.28318	0.130784	0.990757
Dtx4	-1.94534	2.28325	2.28037	0.131021	0.991855
Cyb561a3	-1.09094	4.5504	2.27835	0.131192	0.992452
Lamc1	1.41862	2.80938	2.27366	0.131589	0.99267
Ltb	-0.975493	6.02325	2.27401	0.131559	0.99267
C1galt1	0.804861	6.18397	2.27456	0.131512	0.99267
Crebbp	1.00287	4.55412	2.27481	0.131492	0.99267
Gm15706	2.12476	1.38718	2.25831	0.132899	0.992759
AI314180	-0.726458	5.91741	2.25674	0.133034	0.992759
Gpr146	1.00143	5.15776	2.26011	0.132745	0.992759
Ppat	1.29705	3.83849	2.25653	0.133052	0.992759
4632415L05Rik	2.15487	2.29573	2.25728	0.132988	0.992759
Chchd3	0.689174	6.08811	2.26545	0.132288	0.992759
Sos1	-1.53368	3.36861	2.25864	0.132871	0.992759
Ube2cbp	2.8714	1.24016	2.26843	0.132034	0.992759
Zfp963	3.17012	1.0947	2.27201	0.131729	0.992759
Rpl35a.ps2	2.35837	1.95054	2.27054	0.131854	0.992759
Sh2d1a	1.36171	5.12293	2.26194	0.132588	0.992759
Prkar2b	1.38951	8.14461	2.2669	0.132164	0.992759
Carf	-2.50111	1.84729	2.25738	0.132979	0.992759
Mlkl	-1.41185	3.91739	2.25627	0.133074	0.992759
Mthfd2	-1.70767	7.59945	2.26387	0.132423	0.992759
Klf7	2.82596	1.85095	2.25855	0.132879	0.992759
Smc4	0.987959	7.30902	2.25454	0.133223	0.993186
Art2a.ps	3.79531	0.367343	2.25192	0.133449	0.994182
Gm12185	-1.84608	4.52388	2.25015	0.133602	0.994631
Emp3	-0.866152	6.54862	2.24064	0.134425	0.999813
Atraid	0.945665	4.94435	2.23997	0.134483	0.999813
Braf	-0.637388	4.6879	0.934837	0.333609	1
Mis18bp1	1.83394	2.80042	1.62345	0.202611	1
Mef2c	-0.332915	6.36717	0.250386	0.616803	1
Usp8	-0.00507351	5.93215	9.00607e-05	0.992428	1
Rtel1	0.123198	4.52419	0.0275813	0.868097	1
Tmem120a	-0.103178	3.02305	0.00607084	0.937895	1
Nhlrc2	-0.969848	3.68492	1.47286	0.224895	1
Elf4	0.280177	3.23844	0.0862063	0.769057	1
Fzd5	-0.935894	2.22929	0.509876	0.475193	1
Ppp1r15a	-0.746285	7.64364	0.306619	0.579763	1
Lonp1	0.276736	4.92733	0.132746	0.715601	1
Rps20	0.302713	9.94551	0.315454	0.574353	1
Rffl	-0.345385	4.22227	0.195987	0.657979	1
Narf	0.737779	6.24642	0.768112	0.380802	1
ab2	-0.0976614	5.12648	0.0235901	0.877933	1
Cenpn	-1.39345	2.31918	0.50295	0.478207	1
Itgb3bp	0.409852	2.82164	0.161519	0.687762	1
Zfp335os	2.37117	1.4272	1.83024	0.176099	1
Cpq	1.33152	4.42032	1.482	0.223462	1
Otud5	-0.552828	8.11598	0.494756	0.481814	1
Zscan21	0.635565	3.52915	0.506677	0.476581	1
Baz2a	0.549781	4.4243	0.766747	0.381225	1
Uhrf1	0.271796	3.54249	0.0400192	0.841443	1
2610301B20Rik	1.04313	2.62843	0.485946	0.485741	1
Gm48161	0.0558296	2.5832	0.00105208	0.974124	1
Agtrap	0.552661	5.14567	0.789843	0.374147	1
Fmnl3	-0.515545	2.92778	0.134252	0.714064	1
Swsap1	1.14976	2.46363	1.23908	0.265648	1
Pcgf6	-0.355119	3.32141	0.141945	0.706355	1
Luc7l	0.144845	5.49195	0.0707466	0.790253	1
Cbx1	0.593629	5.07346	0.527723	0.467566	1
Plrg1	0.0290836	5.64458	0.00380827	0.950793	1
Wfdc21	2.04202	5.60471	1.51581	0.218255	1
Lrrc14	0.431199	3.10877	0.140898	0.70739	1
Naa15	0.327249	5.57164	0.279697	0.5969	1
Zfp157	-1.18198	3.76531	1.30845	0.252675	1
Abcd4	1.52865	1.79638	1.05405	0.304575	1
Fbxl19	0.749359	2.98142	0.423428	0.515231	1
Rpe	-0.0966436	5.11578	0.0203404	0.88659	1
Slc35f6	0.981833	3.96901	1.23417	0.266598	1
Efemp1	4.70633	1.65316	1.98346	0.159026	1
Gtf3a	-0.415873	5.13096	0.591243	0.441939	1
Noc3l	0.284228	3.42794	0.0616581	0.803894	1
Tceal8	-0.0783755	5.06648	0.00272966	0.958333	1
Gm7331	0.324746	3.00503	0.062347	0.802824	1
Trib1	0.932426	2.17797	0.394231	0.530084	1
Nat2	-0.232061	4.10281	0.046442	0.829374	1
Zfp952	-0.0364532	4.22555	0.00215996	0.962931	1
Map3k5	-0.810643	5.70972	1.92063	0.165787	1
Dync1i2	0.168241	6.12376	0.130509	0.717905	1
Ttc19	-0.610219	2.26273	0.109583	0.740619	1
Med19	0.164932	4.14051	0.0519892	0.819637	1
Gpsm3	0.645839	2.51453	0.410765	0.521581	1
Stmn1	1.0399	5.58059	1.00847	0.31527	1
Mtmr3	-0.324509	8.62147	0.139415	0.708864	1
Prmt7	-0.228522	3.8582	0.0942861	0.758797	1
Pgap1	-0.304118	5.31174	0.16668	0.683079	1
Ccl9	0.394809	7.52542	0.255724	0.613073	1
Abl1	-0.636753	2.68821	0.285766	0.592947	1
Sord	0.814214	7.04409	0.947701	0.330305	1
Rnf114	-0.421006	9.48393	0.241474	0.623143	1
Crlf3	0.0324849	7.38306	0.00439295	0.947155	1
Spop	-0.313945	7.94198	0.167556	0.682293	1
Slc4a7	-0.739244	4.93225	1.12537	0.288766	1
Taf11	-0.36144	3.64798	0.172373	0.678011	1
Tpgs2	-0.343332	3.8325	0.162162	0.687174	1
Zfp940	1.50096	2.19193	0.984296	0.321141	1
Cd82	-0.44688	7.3566	0.298921	0.58456	1
Eftud2	-0.230102	5.58941	0.175314	0.675432	1
Ric8b	-0.579121	3.74294	0.318725	0.572375	1
Grwd1	-0.885647	3.16766	0.612203	0.43396	1
Urgcp	-0.334315	3.772	0.10033	0.751434	1
Zfyve9	-1.42291	3.79155	1.28294	0.257353	1
Spon1	-1.54335	2.58279	1.01215	0.314387	1
Clic4	-0.0722099	7.23594	0.00981095	0.921098	1
Tnpo2	0.437351	4.71541	0.454128	0.500381	1
Rpl23	0.260825	10.5508	0.201475	0.653533	1
Srbd1	-0.222785	3.70972	0.0721789	0.78819	1
Ugt1a7c	-0.70188	3.78522	0.383033	0.535984	1
Mapk8	0.159971	3.89041	0.0377138	0.846019	1
kr8	-1.61398	2.3968	1.83021	0.176103	1
Cops3	-0.603278	5.62853	1.03066	0.310004	1
Tcf3	0.220814	3.99743	0.0754665	0.783538	1
Rpl7	0.0853477	11.2079	0.0178396	0.893747	1
1110051M20Rik	1.68676	1.25124	0.474272	0.491029	1
Cmc1	0.468991	3.42596	0.25275	0.615146	1
Pdlim5	-0.204096	5.17317	0.14558	0.702796	1
Ppp6r2	-0.435514	3.76772	0.30687	0.579607	1
H2.T23	-0.38536	8.97144	0.411391	0.521264	1
Naa35	0.0216534	4.68075	0.000882291	0.976304	1
Abcb9	1.52654	1.87194	0.585622	0.444117	1
Tyw5	0.221759	2.70149	0.0269477	0.869607	1
Rdh12	0.145393	3.84129	0.0122305	0.91194	1
Notch1	0.873329	2.63907	0.5036	0.477923	1
BC003965	0.420133	3.66081	0.266014	0.606018	1
Serpinb10	-0.2178	5.8572	0.0318457	0.858367	1
Mettl15	0.000577411	2.59037	1.58833e-05	0.99682	1
Nudt17	1.74413	1.32637	0.920783	0.337269	1
Med24	0.164262	4.41011	0.0332801	0.855247	1
Mettl18	1.18583	2.64976	0.734158	0.391539	1
E130307A14Rik	0.381485	2.68994	0.0613371	0.804395	1
Sfmbt2	0.436009	1.39195	0.0485667	0.825576	1
Phospho2	0.0131157	4.83856	0.000394259	0.984158	1
Orai2	-0.000629046	5.81757	1.46574e-06	0.999034	1
Grap	-0.205081	6.58613	0.118155	0.731044	1
Fam104a	0.271023	4.43777	0.0758119	0.783055	1
Brat1	-0.799573	3.71872	0.996993	0.318039	1
Rnpc3	1.01469	4.2649	0.881796	0.34771	1
Polq	-1.28997	2.16841	0.360389	0.54829	1
Calcrl	-0.154045	4.87398	0.0247029	0.87511	1
Pygm	0.471859	1.89495	0.0839363	0.772032	1
Neu1	0.395694	5.12499	0.37208	0.541873	1
Atpif1	-0.0244235	8.91406	0.000614817	0.980218	1
Reep4	-0.103557	3.41916	0.0126786	0.910348	1
Colgalt1	-0.243116	5.90193	0.201842	0.653238	1
Ddx19a	-0.440102	1.45856	0.0423831	0.836891	1
Tmem176a	-1.03503	2.5657	0.384606	0.535148	1
Gna11	0.478724	3.26954	0.260273	0.609933	1
Snapc5	0.550646	4.61537	0.68316	0.408501	1
Dek	0.0310733	7.07362	0.00427225	0.947885	1
Grk5	0.420893	4.80005	0.356544	0.550432	1
Ms4a4b	0.784223	8.04596	1.23265	0.266892	1
Chordc1	-0.598898	6.12083	0.896575	0.343702	1
Hdac4	-1.01063	4.10471	1.67027	0.196222	1
Rec114	-0.803822	9.35962	0.253195	0.614835	1
Tmem159	0.367153	2.05542	0.0754931	0.783501	1
Slc4a1	-1.79872	11.2765	0.771546	0.379739	1
Gm28151	0.657719	1.90321	0.207571	0.648678	1
Smyd4	1.66579	3.35235	1.55869	0.211857	1
Itih2	9.21871	2.67202	8.72898e-07	0.999255	1
Rnf38	-0.00567424	5.27439	5.29902e-05	0.994192	1
Trappc6b	0.517062	5.00809	0.630056	0.427335	1
Iqgap1	-0.416268	7.37435	0.897939	0.343335	1
Gm1821	-0.65305	4.26858	0.340527	0.559525	1
Nudt9	0.0300972	4.58361	0.00158703	0.968223	1
Pnpla2	-0.188308	4.42286	0.0560418	0.812865	1
Ctss	-0.81885	9.87091	1.90876	0.167101	1
Exosc8	0.294329	5.15376	0.176648	0.67427	1
Lactb	0.684235	4.67499	1.14743	0.284088	1
Mob3a	-0.0925062	7.1203	0.0324407	0.857064	1
Kdm4b	-1.2042	2.59066	0.876136	0.349262	1
Sh3gl1	-0.287076	4.85326	0.128307	0.720193	1
Cr1l	-0.273383	6.62084	0.42619	0.513865	1
Timd4	2.3206	4.60838	0.77851	0.377597	1
Srpk2	-0.243287	5.06784	0.208936	0.647602	1
Klf11	1.44155	2.62781	1.16343	0.280755	1
2009-03-01	2.70092	1.23968	1.2412	0.26524	1
Ank1	-1.89447	5.66884	0.83011	0.362241	1
Rnf11	-0.178141	10.3418	0.0183759	0.892171	1
Nup35	-0.567721	3.8991	0.424439	0.51473	1
Gm14403	-1.20715	1.05712	0.0350053	0.851585	1
Gata1	1.18757	4.98916	1.01483	0.313748	1
Pggt1b	-1.15411	3.02343	0.961993	0.326685	1
Il10ra	-0.761948	6.98563	2.03956	0.153254	1
Ltbp1	0.421329	5.75552	0.221468	0.637923	1
Glod4	0.0580729	5.30444	0.00854232	0.926361	1
Ubxn11	-0.913703	2.20166	0.409352	0.522298	1
2010111I01Rik	0.0328065	4.7854	0.00217387	0.962812	1
Mat2a	-0.500915	6.39645	1.07146	0.300616	1
Becn1	-0.280335	10.1783	0.072177	0.788193	1
Rpusd4	-0.979596	3.91827	1.46467	0.226189	1
Wars2	-0.0777912	3.36501	0.00711576	0.932774	1
Gm28053	2.38741	1.14139	0.768366	0.380723	1
Fkbp8	0.331352	7.59489	0.203343	0.652036	1
Zfp592	0.0642826	4.63161	0.00972145	0.921458	1
Ncor1	0.244189	6.47137	0.229929	0.631576	1
Efhd2	0.365589	4.89579	0.23663	0.626651	1
Dnmbp	1.81689	1.58001	1.07032	0.300874	1
Zfp275	0.41829	3.5846	0.246833	0.619314	1
Srrm2	0.202915	4.15006	0.0721927	0.788171	1
Gimap1	-0.143528	5.79836	0.0787782	0.77896	1
Rps11	0.187444	9.91918	0.122279	0.726575	1
Gtf2h1	0.174375	5.37613	0.105373	0.745475	1
Acss1	0.186592	5.85153	0.130246	0.718177	1
Aasdhppt	0.540592	4.12769	0.714924	0.397814	1
Golim4	-0.585466	3.0309	0.284141	0.594	1
Tnfrsf21	-0.71469	4.02857	1.02324	0.311751	1
Adamts14	-1.30707	3.35657	0.942569	0.331618	1
Ubac1	-0.686162	8.30858	0.375279	0.540141	1
Taf9b	0.501166	3.60234	0.313765	0.575379	1
Cdipt	-0.34492	5.31692	0.341539	0.558942	1
Zfp593	0.82195	2.63834	0.501138	0.479	1
Hnf4a	22.5895	2.26596	-4.76391e-08	1	1
H2.Q4	-0.237719	7.85085	0.202871	0.652414	1
Calu	0.0620739	6.49035	0.0189383	0.890543	1
po6	-0.464141	2.66039	0.198457	0.655969	1
Slc25a33	1.58355	2.30025	0.779348	0.377341	1
Gtpbp8	0.342109	3.48967	0.14012	0.708161	1
Phf12	-0.60874	3.19082	0.568472	0.450867	1
Ddias	-1.02441	1.33631	0.177964	0.673128	1
Chtf8	-0.496243	6.46847	0.728587	0.393342	1
Pom121	-0.998465	2.61689	0.942496	0.331637	1
Mapre2	0.691877	5.79328	0.846804	0.357458	1
Trbv13.2	1.15671	3.2849	1.35101	0.245102	1
Kbtbd7	1.10314	3.54562	1.25658	0.2623	1
Commd8	0.307039	5.70577	0.317397	0.573176	1
Gcnt2	-0.461756	5.69382	0.379276	0.537991	1
Mrps26	-0.131014	4.27984	0.0154593	0.90105	1
Dhx35	0.405303	2.85263	0.0868745	0.768189	1
Zadh2	0.990945	2.54277	0.529777	0.466701	1
Gm3604	-1.75366	1.08776	0.716075	0.397435	1
Klf13	0.382313	5.54451	0.38264	0.536194	1
Plcd3	-0.0155882	0.464911	0.000575383	0.980863	1
Tank	-0.0867267	6.1404	0.0273693	0.8686	1
Cotl1	-0.56664	7.2985	0.751002	0.386159	1
Iqce	1.44907	2.53714	1.40808	0.235376	1
Gm47992	-0.698307	1.47591	0.138865	0.709412	1
Ldlrap1	-0.523778	4.416	0.655601	0.418117	1
6330418K02Rik	-0.195018	1.75928	0.0125002	0.910978	1
Mkks	-1.60807	2.37437	1.36774	0.2422	1
H2.Q10	0.606376	6.27807	0.239359	0.624669	1
Smu1	-0.0397766	6.86068	0.0073129	0.931852	1
Usp15	-0.379164	10.6039	0.110797	0.739239	1
Cul4a	-0.106746	8.28527	0.00842408	0.926871	1
Ccdc88b	-0.542263	5.34829	0.419552	0.517161	1
Ttc9c	-0.38166	5.25828	0.45841	0.498368	1
Gbp11	-2.39391	2.82624	2.00263	0.157027	1
Pwp2	-1.0174	4.21238	2.05336	0.15187	1
Alpk1	-1.17415	3.11171	1.69905	0.192412	1
Cdk16	0.591962	4.19158	0.763656	0.382187	1
Smad3	0.53249	3.80572	0.441523	0.506388	1
Rgs10	0.680077	8.08125	0.777876	0.377791	1
Slc9a9	0.29616	3.7462	0.084083	0.771839	1
Aamp	0.0594337	5.58043	0.0111661	0.915844	1
Ypel5	0.338154	8.83372	0.113043	0.736705	1
Tspan2	-0.313578	5.51594	0.0821816	0.774362	1
Etv3	-0.375993	4.75987	0.428916	0.512522	1
Crtam	-0.423329	2.99899	0.104292	0.746739	1
Tmem29	1.07846	5.35806	1.23839	0.265782	1
Ndufv2	0.626864	6.33048	1.54407	0.214014	1
Fbxo30	-0.0614165	6.28251	0.00269583	0.958591	1
Atp2a2	-0.0618065	3.71905	0.00377742	0.950992	1
Ccdc88c	0.209309	5.70455	0.130468	0.717947	1
Maml3	-0.358301	1.2472	0.0510007	0.821331	1
Tpt1.ps5	1.503	2.54772	0.68108	0.409215	1
Sec61a1	-0.107547	6.51587	0.0388529	0.84374	1
Ufc1	0.231726	6.19213	0.179596	0.671721	1
Hspa1a	-1.27178	0.952703	0.31156	0.576724	1
Aak1	0.124311	5.44554	0.0524163	0.818911	1
C530008M17Rik	1.23767	3.59148	0.83421	0.361058	1
Prom1	-2.39172	0.532616	0.435705	0.509203	1
Glrx2	1.24523	4.99526	1.80501	0.179108	1
Armcx1	-1.04327	1.64815	0.355639	0.550938	1
Sash3	0.408291	7.60013	0.72035	0.396029	1
Ckap5	-0.83466	5.28229	1.70048	0.192225	1
Zfp101	0.527658	4.09061	0.458165	0.498483	1
Tmem268	-0.352389	4.87795	0.28814	0.591415	1
Gatd1	0.4849	3.06299	0.173847	0.676715	1
2700038G22Rik	0.497604	1.48377	0.0660003	0.797252	1
Ptprj	-0.285209	6.80514	0.223357	0.636494	1
2810002D19Rik	-0.213653	2.00775	0.0236587	0.877757	1
Rilpl2	0.592364	5.1202	0.268095	0.604613	1
Snhg17	1.59363	3.09165	1.78113	0.18201	1
Retreg3	0.00807537	7.07404	0.000226543	0.987991	1
2003-03-01	-0.302105	6.92874	0.028427	0.866109	1
Slc2a3	0.781997	7.60312	0.766883	0.381183	1
Mospd2	0.835589	4.39685	0.952709	0.329031	1
Zfp961	-0.322811	3.99519	0.202041	0.653079	1
Ippk	1.90663	3.05077	1.76005	0.184619	1
Ccpg1os	-0.525646	1.95602	0.127102	0.721456	1
Zfp207	0.274337	7.19297	0.350384	0.553896	1
Prkci	-0.469847	3.00067	0.16418	0.685337	1
Gm5960	-1.85664	3.11089	0.374413	0.540608	1
Zfp933	0.0646489	2.8	0.002278	0.961933	1
Emc10	0.851282	2.39407	0.602278	0.43771	1
Ctsw	-0.176103	5.31996	0.0454594	0.831162	1
Ercc3	0.510982	4.52488	0.673372	0.411878	1
Cep83	1.02849	4.70243	1.9271	0.165076	1
Vps41	-0.277038	5.85744	0.375597	0.539969	1
Mbnl2	0.518987	6.55328	0.591559	0.441817	1
Rpl38.ps2	-0.694413	5.64634	0.855719	0.354939	1
krx	-0.0675406	2.02185	0.00227389	0.961967	1
Rnh1	-0.311262	7.06525	0.249966	0.617099	1
Rer1	-0.115364	6.78973	0.0589229	0.808206	1
Zfp809	0.727466	3.89343	0.487834	0.484895	1
Wipf1	0.041074	6.67075	0.00656434	0.935426	1
Fkbp2	0.108003	3.31221	0.00830869	0.927372	1
Gpr83	0.686723	1.76024	0.200117	0.654626	1
Mir142hg	0.492353	4.33002	0.256535	0.612511	1
Peli2	1.59586	0.935562	0.575053	0.448258	1
Nrf1	0.281153	5.16125	0.214778	0.643048	1
Ube2t	0.389376	2.00704	0.0632501	0.801431	1
Med4	-0.0844504	4.38275	0.0166464	0.897341	1
Osm	-0.347174	2.93529	0.0477556	0.827016	1
Usp42	-0.425622	3.24249	0.187015	0.665413	1
Ido1	0.414799	0.323576	0.165275	0.684345	1
Dnmt3a	0.945726	4.36234	1.70614	0.191487	1
Supt16	-0.277683	6.48172	0.293685	0.587869	1
Usp24	-0.619088	5.29154	1.44822	0.228813	1
Txn1	0.247918	7.46474	0.249634	0.617333	1
Uap1l1	-0.238464	3.77699	0.0813018	0.775541	1
4930599N23Rik	-2.3541	1.43687	0.543525	0.460975	1
D230025D16Rik	1.13698	3.97125	2.18313	0.139531	1
Sgms1	-0.0404558	5.53837	0.00398187	0.949685	1
Socs2	1.63396	1.88695	0.718078	0.396775	1
Gm9958	1.2319	1.47241	0.465962	0.494851	1
Pus10	0.522103	4.17599	0.329415	0.566004	1
Riok1	0.056943	5.19646	0.00765163	0.930295	1
Nfia	1.37415	1.04209	0.313269	0.575681	1
Slc38a5	-0.330604	5.101	0.0349938	0.851609	1
Klf10	-0.0771274	4.2999	0.0137303	0.90672	1
Dcun1d3	0.890638	2.80255	0.730421	0.392747	1
Ints6	-0.413981	4.75277	0.552979	0.457103	1
Nme7	-0.110622	3.33491	0.00874767	0.925483	1
Inppl1	-1.01861	2.55645	0.528078	0.467416	1
Fam219b	0.368613	3.22661	0.0989043	0.753149	1
Vgll4	-0.282207	3.79145	0.172636	0.67778	1
Zswim4	0.746893	2.81387	0.43066	0.511665	1
Ptch1	-0.82835	2.85156	0.565972	0.451864	1
Git2	1.15201	3.31749	2.03357	0.153858	1
Banf1	0.465073	4.5019	0.43745	0.508356	1
2500004C02Rik	1.9832	2.65293	2.1083	0.146502	1
Tubb6	-0.904794	4.2889	1.24392	0.264716	1
Cenps	-0.271699	1.94236	0.0396039	0.842257	1
Mmp25	-0.80796	1.37818	0.0654331	0.798106	1
Ankrd40	-0.550572	4.69618	0.884276	0.347033	1
Nudt21	0.300738	5.5825	0.270216	0.603187	1
Znf41.ps	-0.45947	2.51648	0.0989502	0.753093	1
Ccl8	2.6781	0.611705	1.60576	0.205089	1
Sumo1	0.388888	7.17346	0.683341	0.408439	1
Loxl3	0.503783	1.40735	0.102672	0.748646	1
Rfc1	-0.527504	5.49231	1.03403	0.309214	1
Vta1	0.156695	5.32936	0.089366	0.764985	1
Gm37305	0.45129	2.74304	0.155614	0.693227	1
Taco1	-0.140243	2.68727	0.0169593	0.896386	1
Lipg	0.582223	2.91177	0.225106	0.635177	1
Phactr2	0.487973	2.60227	0.146737	0.701674	1
Dynll2	0.744067	2.56223	0.363068	0.546807	1
Smim13	1.52335	3.28767	1.81047	0.178452	1
Gm15050	-0.0753992	2.30127	0.0010692	0.973915	1
Trip10	-1.24674	1.98873	0.933241	0.334022	1
Ppp3cc	-0.415149	5.82645	0.588377	0.443047	1
Paf1	0.245669	5.24884	0.186198	0.6661	1
Fbxw4	0.199288	3.55432	0.058515	0.808859	1
Plod1	1.21114	3.68402	1.66546	0.196868	1
Mast4	-0.186376	1.56043	0.00826302	0.927571	1
Btrc	0.519773	1.83109	0.0868681	0.768197	1
Tmem170	-1.70749	2.1196	1.23021	0.267367	1
Dcaf13	0.575245	4.88373	0.782215	0.376465	1
Zc3h12a	-1.81983	1.12354	0.937853	0.332831	1
Igkv10.96	-0.983264	1.76179	0.270079	0.603278	1
Zfp511	0.509507	3.58107	0.321875	0.570483	1
Col4a3bp	0.41226	5.47139	0.57902	0.446697	1
Slc24a3	0.669321	2.93118	0.264999	0.606706	1
Prrc1	0.103233	2.47053	0.00603572	0.938075	1
Tbcel	0.961351	5.78071	0.751962	0.385856	1
Ptgs1	0.587347	6.03	0.504237	0.477644	1
Cenpa	0.724405	4.77172	0.893675	0.344483	1
Mtcp1	0.690897	1.90936	0.244391	0.621053	1
Cenpf	1.14783	3.4829	0.789499	0.374252	1
Abhd11	0.570562	3.97604	0.512237	0.474172	1
Tardbp	0.0514343	6.90518	0.0105649	0.918133	1
Trappc10	0.370218	4.68791	0.383983	0.535479	1
Cox18	-0.154931	2.50728	0.0111664	0.915843	1
Rhoh	0.00757057	6.45886	0.000176271	0.989407	1
Eps8	0.170804	2.33617	0.0144743	0.904238	1
Ilf3	-0.866684	4.47459	1.6599	0.197617	1
Klc1	-0.256857	5.08338	0.150764	0.697806	1
Fcgr2b	-0.496427	6.26567	0.595872	0.440157	1
5830468F06Rik	1.08858	2.33207	0.716631	0.397251	1
Magohb	-1.65722	3.54556	1.8466	0.174179	1
Slc16a6	-0.348837	5.49002	0.181091	0.670438	1
Rasal1	-1.95285	1.3031	1.74893	0.186011	1
Ppp1r7	0.903687	4.82654	2.07681	0.149552	1
Rin3	-0.703542	5.03524	1.57797	0.209054	1
Ccnf	0.947792	2.25479	0.383325	0.535829	1
Chil1	-0.714814	5.56366	0.37344	0.541135	1
Spo11	1.87823	2.52191	0.644023	0.422258	1
Ulk3	-1.9236	1.45088	0.921124	0.33718	1
Slc30a9	0.170879	7.16039	0.0341295	0.853432	1
Nubp1	-0.292398	5.56774	0.266088	0.605968	1
Asf1a	0.912759	4.55044	1.41316	0.234532	1
Mbtps1	0.357814	5.71563	0.468056	0.493883	1
Tubd1	-0.462308	2.4663	0.0768102	0.781668	1
Dkc1	-0.180494	6.35493	0.121411	0.727509	1
Ttc39b	0.244233	5.18529	0.157171	0.691775	1
Mtch2	-0.105076	6.18923	0.0437106	0.834393	1
Irf2	-0.540473	2.17156	0.148058	0.700398	1
Ednrb	1.21911	4.7636	0.297995	0.585142	1
Zfp975	2.39495	1.25276	0.662479	0.415686	1
Rab21	0.0968837	5.79094	0.0285396	0.865847	1
Atxn7l1	0.0148604	3.84014	0.000158924	0.989942	1
Hexdc	1.27272	1.8872	0.679286	0.409833	1
Lypla2	-0.33892	4.95548	0.20972	0.646987	1
Eif2d	0.452764	4.78674	0.395418	0.529465	1
Mars	-0.624272	5.03208	1.1628	0.280885	1
Slc29a1	1.08209	4.00915	1.144	0.284808	1
Tet3	-0.257102	4.26063	0.0916183	0.76213	1
Cpm	0.28096	4.38352	0.123665	0.725093	1
Brca1	0.227293	2.97839	0.0214218	0.883636	1
po4	0.223032	4.25828	0.105769	0.745013	1
Rfc2	-0.551013	5.85391	0.978911	0.322468	1
Ptcd2	-0.163896	5.39818	0.0949402	0.757988	1
1700011B04Rik	-3.35835	0.660193	1.8525	0.173492	1
Shq1	-1.47316	2.46376	0.766575	0.381279	1
Tubb1	1.32536	8.4576	0.855194	0.355087	1
Suds3	-0.32575	7.88373	0.14664	0.701767	1
Zfp773	0.615151	2.74764	0.413377	0.520261	1
Prokr1	2.30364	3.47739	2.09267	0.148007	1
Hyal2	0.865326	1.35336	0.211661	0.645469	1
Cd101	-0.624739	4.13948	0.351982	0.552993	1
Myzap	3.10878	0.99771	1.13167	0.287418	1
Zdhhc13	-0.571455	4.5289	0.473031	0.491596	1
Fbxo46	0.786827	1.70535	0.375737	0.539893	1
Rrp1	0.345636	6.15687	0.289105	0.590795	1
Gm31597	2.33393	1.37259	1.33434	0.248034	1
Lgmn	0.478179	6.31488	0.497946	0.480404	1
Kdm2b	0.996644	3.21626	1.2625	0.261179	1
Acp2	0.0726927	5.09537	0.0158636	0.899771	1
Tinf2	-0.311645	5.05862	0.131903	0.716467	1
Pop1	0.317292	2.71955	0.0839353	0.772034	1
Tfam	0.0790716	5.59403	0.0168597	0.896689	1
Heatr3	0.420226	4.25384	0.41008	0.521929	1
Mettl27	-1.03289	4.80542	0.721519	0.395646	1
Dcaf7	-0.165899	6.03965	0.138203	0.710074	1
Snx29	-0.792061	1.95119	0.435231	0.509433	1
Atrn	0.514122	4.09263	0.401022	0.526562	1
Tbc1d9b	-0.592512	3.29342	0.362612	0.547059	1
Ezh1	0.00793644	5.52579	0.000204489	0.988591	1
Ube2e1	0.120278	4.47435	0.0296179	0.86336	1
Pomgnt1	0.443949	3.70161	0.210527	0.646354	1
Rnf41	-0.93671	3.91777	1.12522	0.288798	1
Sri	0.404261	7.05998	0.828623	0.362671	1
Cdca2	-0.439275	3.16661	0.088899	0.765582	1
Mybl2	-1.14398	1.08316	0.242723	0.622246	1
Orc4	0.27907	5.5761	0.238563	0.625246	1
Susd1	0.536533	5.06627	0.528389	0.467285	1
C1qb	1.92714	4.91268	1.04541	0.306567	1
Imp4	-0.29544	5.25988	0.295064	0.586993	1
Ubr3	-0.00217314	5.57733	1.10652e-05	0.997346	1
C920009B18Rik	-1.00717	3.23744	0.755475	0.384748	1
Mrpl47	0.0704771	3.73824	0.00735076	0.931676	1
U2af1	-0.079855	5.23841	0.0104683	0.918507	1
Map2k2	-0.719485	7.08217	0.519065	0.471241	1
Ep400	-0.291163	5.15331	0.257185	0.612061	1
4932438A13Rik	0.58727	4.63183	0.500929	0.479092	1
Fam49a	-0.693266	6.71458	1.6116	0.204267	1
Mlf2	-0.0752231	5.42969	0.0177169	0.894111	1
Apool	0.278067	4.19282	0.150067	0.698472	1
Mrpl41	0.41377	4.11407	0.39352	0.530455	1
H2.K1	-0.261286	11.2775	0.148173	0.700288	1
Ubtd1	-0.361138	3.01967	0.141304	0.706988	1
Mocos	-0.551503	3.96594	0.278778	0.597504	1
Dennd4c	0.436249	4.55241	0.271181	0.60254	1
Mettl5	0.0359705	2.04567	0.000753017	0.978108	1
Nub1	0.00618932	5.89348	0.000189621	0.989013	1
Zfp97	-0.974896	3.03545	0.465987	0.494839	1
Pdhx	0.280219	2.91819	0.0640562	0.800196	1
Rapgef1	0.144867	4.49729	0.0324533	0.857036	1
Tmem14c	0.461109	6.13762	0.616562	0.432328	1
Zbtb34	0.521688	1.29611	0.0771642	0.781178	1
Siah2	-0.646387	3.41884	0.381059	0.537037	1
Frs2	-0.744919	2.7875	0.395486	0.52943	1
Zfp992	1.38441	2.21168	0.87136	0.350579	1
Cptp	0.391619	2.9463	0.110985	0.739026	1
Slc9a6	-0.883287	3.86578	1.21528	0.270289	1
Apoo	1.92786	2.49989	1.15335	0.28285	1
Slc9a8	-0.192391	4.94408	0.08175	0.77494	1
Fggy	1.23289	1.82758	0.382771	0.536124	1
Arhgap18	0.859249	6.53434	0.758945	0.383659	1
F8a	-0.296715	2.35575	0.0771698	0.78117	1
Pcp4l1	-0.673502	2.50532	0.225997	0.634508	1
Dock10	-0.534267	7.20062	1.0292	0.310347	1
Slc4a8	-1.65447	1.85284	1.27834	0.258208	1
Yipf4	0.158494	8.91534	0.0142404	0.905011	1
Washc4	0.0948466	5.61559	0.0332956	0.855213	1
Ly96	-1.80506	2.81603	1.99874	0.15743	1
Gadd45g	-1.47646	2.52398	1.32482	0.249728	1
Strn4	0.0525889	4.01978	0.00474545	0.945079	1
Actb	-0.486322	11.1232	0.673983	0.411666	1
Uspl1	-0.0310247	5.41901	0.00173936	0.966733	1
Reep5	-0.581345	4.90758	0.776995	0.378062	1
Selenoi	-0.733401	3.41385	0.519758	0.470945	1
Lin54	-0.616342	3.30254	0.304495	0.581078	1
Cnrip1	0.352206	1.28011	0.0235669	0.877992	1
Zbtb25	-0.0175152	3.45104	0.000555571	0.981195	1
Tmem250.ps	-0.269516	3.66179	0.109947	0.740205	1
Uqcrfs1	0.23462	6.35859	0.293835	0.587773	1
Ncln	0.302941	2.05157	0.058178	0.809399	1
Lrp6	-0.102552	3.87722	0.0171343	0.895856	1
Tinagl1	-2.03028	3.56093	1.52369	0.217062	1
Gmpr2	0.572385	4.06529	0.383764	0.535596	1
D030028A08Rik	-1.34868	1.64297	0.657848	0.417321	1
Mmp19	0.127089	5.06376	0.0123955	0.911351	1
Elavl1	-0.709096	5.06054	1.8944	0.168706	1
Nxt2	-0.896588	2.81317	0.574573	0.448447	1
Piga	1.12405	3.62368	1.088	0.296914	1
Nprl3	-0.0976352	5.02091	0.0201589	0.887094	1
Cxcr3	1.33065	4.74167	0.986742	0.32054	1
Ptk2b	-0.576864	5.57427	1.14625	0.284336	1
Nfkb2	-1.02013	4.78167	1.96162	0.16134	1
Cox6b2	-0.459444	6.06753	0.0383596	0.844723	1
Azi2	-0.195013	6.33257	0.218751	0.639993	1
Suclg1	0.196846	5.536	0.152161	0.696479	1
Gm42715	0.649091	1.15795	0.0604823	0.805735	1
Plcxd2	0.958506	3.2548	0.308556	0.578567	1
Scp2	0.214973	7.33543	0.201461	0.653545	1
Mcam	0.0355093	2.81015	0.000185162	0.989143	1
Smarce1	0.482009	6.29856	1.10432	0.293321	1
Fam168b	-0.18808	6.70569	0.139899	0.708382	1
Srm	1.01654	3.10518	0.624021	0.429557	1
Ube2j2	0.422806	5.51	0.770371	0.380102	1
Tube1	1.29184	1.94348	0.360339	0.548318	1
1500009L16Rik	1.9601	2.09168	0.846102	0.357657	1
Dlgap4	-0.76437	4.07135	0.93883	0.332579	1
BC003331	0.217871	4.76122	0.120019	0.729014	1
Krtcap3	-0.0166947	1.61104	0.000146582	0.99034	1
Treml1	1.34158	5.88242	1.46129	0.226725	1
B4galt7	0.682293	4.09366	1.18905	0.275522	1
Zfp36l1	-0.385657	6.07286	0.268467	0.604362	1
Zfp473	-1.93769	0.761321	0.277899	0.598082	1
Aimp2	-0.861333	3.62374	0.900686	0.342598	1
Itgb1	-0.00937493	8.9362	0.000253338	0.987301	1
Ing5	-0.299495	3.74079	0.103678	0.74746	1
Thoc7	0.692107	5.43087	1.29167	0.255741	1
Rpf2	-1.00082	4.37511	1.47665	0.224299	1
Esco1	-0.0409184	5.48928	0.00417438	0.948485	1
Oat	-0.0895183	6.13719	0.0373067	0.846842	1
Atp5a1	0.0873947	9.26051	0.0307703	0.860754	1
Actl6a	-0.345392	5.64229	0.317585	0.573062	1
Rpl23a	0.0586519	10.2908	0.010236	0.919413	1
Smim4	0.750143	5.07744	0.460555	0.497365	1
Gtf3c5	0.690502	3.09739	0.529832	0.466677	1
Lrpprc	0.264427	5.37697	0.205757	0.650114	1
Eloa	-0.372799	6.75641	0.23137	0.63051	1
Cd81	0.263839	6.19062	0.174516	0.676129	1
2410015M20Rik	0.767891	6.05725	1.34665	0.245865	1
Tgds	0.213437	3.39864	0.0644471	0.7996	1
Tmem222	-0.429768	4.39112	0.39106	0.531743	1
Clnk	1.12536	1.21145	0.258614	0.611074	1
Gapvd1	0.121786	7.1214	0.0319824	0.858066	1
Bbs7	1.24833	1.75052	0.438528	0.507834	1
A630023P12Rik	0.583359	3.11812	0.257619	0.611761	1
Rasgrp3	-0.0701277	4.6215	0.00575666	0.93952	1
Pop5	0.386789	4.74836	0.482279	0.487392	1
Trmt6	-0.893554	4.39619	1.32374	0.249922	1
Slc7a6os	-0.0166188	3.7448	0.000303406	0.986103	1
Med28	0.0483072	6.12925	0.0079647	0.928887	1
Nedd4	0.237081	5.41504	0.107411	0.743112	1
4930503L19Rik	-0.0259357	3.10934	0.000568635	0.980975	1
Nipsnap2	1.06956	5.0044	2.13471	0.143998	1
Pgam1	1.08976	2.29027	0.478902	0.48892	1
Ing2	0.722345	4.65181	0.596891	0.439767	1
Kcnj2	-0.40791	3.52192	0.143784	0.704547	1
4930438A08Rik	-0.768018	0.493519	0.0720826	0.788328	1
B3galt4	-1.19583	2.4463	0.892638	0.344763	1
Cops9	0.0898266	5.1014	0.0301753	0.862093	1
Pigu	-0.913825	3.82268	1.20321	0.272681	1
Bcas3os1	-1.02962	1.90863	0.203403	0.651988	1
[truncated: 8,781 more rows]

## Sheet: PbNK65_Early-Control
SYMBOL	logFC	logCPM	LR	PValue	FDR
Nat8f2	-34.987	3.04482	97.5462	5.26136e-23	5.67175e-19
Mbl2	-31.6984	3.46007	74.0938	7.44924e-18	4.01514e-14
Apoa5	-27.5663	3.49144	66.1135	4.25691e-16	1.52965e-12
Cyp2c68	-46.6636	3.49333	50.1441	1.42857e-12	3.84998e-09
Hnf4a	-27.8682	2.26596	44.2423	2.90143e-11	6.25549e-08
Ifit3b	6.30201	6.53	31.1222	2.42288e-08	4.35312e-05
Nek2	9.17059	3.39565	28.5653	9.05904e-08	0.000128519
Cfi	-28.103	2.2881	28.4656	9.53759e-08	0.000128519
Cyp2a5	-23.4299	2.05658	27.8711	1.29671e-07	0.000144258
Cep55	9.16039	3.27747	27.8102	1.3382e-07	0.000144258
Serpina3f	6.29376	5.97168	27.1452	1.88731e-07	0.000184956
Slco1b2	-26.9426	1.6279	23.7436	1.1006e-06	0.00098871
Oas1g	5.44171	5.12028	22.5678	2.02855e-06	0.00168213
Oas1a	3.60771	7.18257	22.3266	2.3e-06	0.001771
Pzp	-23.1673	5.04909	21.8661	2.92354e-06	0.00210105
Spon1	8.84165	2.58279	21.087	4.38903e-06	0.00295711
Phf11b	3.27785	7.38656	19.6725	9.19139e-06	0.00521491
Nuf2	6.05878	3.86267	19.8572	8.34475e-06	0.00521491
AI847159	10.916	1.17857	19.721	8.9609e-06	0.00521491
Upp1	8.75706	5.76842	18.7713	1.47366e-05	0.00794302
Cenpw	7.83124	2.0578	17.4549	2.94203e-05	0.0144902
Shcbp1	8.68447	3.1082	17.4451	2.95719e-05	0.0144902
Alb	-28.253	10.2259	17.2933	3.20316e-05	0.0150131
Tgtp1	3.53725	7.31153	16.8467	4.05236e-05	0.0182018
Phf11a	5.89658	5.33059	16.6837	4.4158e-05	0.0183086
Zbp1	3.78899	8.3301	16.7086	4.3583e-05	0.0183086
Ly6c2	3.39017	9.31325	16.2858	5.44695e-05	0.0217475
Mill2	9.34903	1.59957	15.987	6.37801e-05	0.0245553
Lpl	5.87872	5.0547	15.8225	6.95692e-05	0.0258605
Gbp2	4.67477	10.3345	15.3442	8.95973e-05	0.0321953
St8sia4	-2.92689	6.08034	15.2628	9.35415e-05	0.0325283
Parpbp	8.34457	2.14053	15.051	0.000104644	0.035252
Sapcd2	10.9687	1.25711	14.6612	0.000128668	0.0420316
Cxcl9	8.0967	3.73284	14.533	0.000137727	0.0436676
Rgn	-17.8034	3.05396	14.2909	0.000156622	0.0482397
Casd1	-3.2269	4.73682	14.0344	0.000179501	0.0537507
Gm45705	8.25958	1.82332	13.9241	0.000190346	0.0539981
Cd55	-3.11098	7.05485	13.949	0.000187838	0.0539981
Ube2w	-2.90633	4.3901	13.6013	0.000226035	0.0566664
Cps1	-18.1559	3.24716	13.7227	0.000211873	0.0566664
Igkv12.89	10.5256	0.779909	13.6829	0.000216422	0.0566664
Fam214a	-2.8831	4.44425	13.6246	0.000223241	0.0566664
Ccnl1	-2.54772	6.18201	13.7714	0.000206458	0.0566664
Irf7	3.38124	9.14713	13.4387	0.000246481	0.0590459
Psrc1	6.71422	2.54009	13.4648	0.000243083	0.0590459
Gm12185	5.79795	4.52388	13.1813	0.000282751	0.066262
Prc1	5.99096	4.37931	13.0924	0.000296495	0.0680046
Dscc1	7.64936	1.84366	13.0066	0.000310394	0.0682868
Mlkl	4.02073	3.91739	13.0222	0.000307816	0.0682868
Ifi204	2.50218	8.05804	12.8914	0.000330095	0.0711685
Mbip	-3.16425	3.48394	12.8398	0.00033933	0.071725
Zfp146	-2.75751	4.34437	12.7848	0.000349443	0.0718108
B3gnt5	-2.52354	6.12284	12.7656	0.000353059	0.0718108
Camk1d	-2.80815	4.67374	12.5407	0.000398174	0.0753038
Slc2a6	3.32229	5.54263	12.6184	0.000381968	0.0753038
Gm15675	-2.94931	5.94465	12.5498	0.000396256	0.0753038
Kmo	-2.77954	5.72632	12.5696	0.000392073	0.0753038
Fam110a	10.4963	0.864823	12.4676	0.000414064	0.0759863
Lgals3bp	2.82652	5.16854	12.4595	0.000415881	0.0759863
Igtp	2.36493	8.9983	12.2666	0.000461126	0.0814909
Gbp6	2.70271	5.47325	12.2874	0.000456015	0.0814909
Bak1	3.30567	5.16564	12.2062	0.000476301	0.082815
Snrnp48	-2.83524	4.56106	12.1387	0.000493863	0.083185
Tubb3	7.5325	2.86242	12.1429	0.000492745	0.083185
Fam78b	8.13829	1.40557	12.1054	0.000502751	0.0833793
Mex3b	-12.8273	1.05836	11.9399	0.000549439	0.0872267
Pdcd1	8.67576	3.189	11.9693	0.000540854	0.0872267
Ifitm3	2.31274	8.69706	11.9373	0.000550224	0.0872267
Slamf8	3.97168	4.3483	11.7779	0.000599396	0.0936447
Hpgd	-7.50804	3.58998	11.7462	0.000609681	0.0938064
Cdkn1b	-2.63244	6.31809	11.7215	0.000617834	0.0938064
Inpp4b	-2.16663	5.36985	11.6721	0.000634428	0.094988
Cmah	-2.21862	6.56875	11.6262	0.000650284	0.0960282
Gpd1	-9.51741	2.43347	11.5767	0.000667848	0.0963781
Bst2	2.91934	6.4733	11.5692	0.000670534	0.0963781
Ccrl2	4.97179	4.45161	11.5336	0.00068351	0.0969505
6720427I07Rik	-4.3019	3.02653	11.509	0.000692595	0.0969634
I830127L07Rik	2.895	6.58402	11.4796	0.000703656	0.0972489
Kif15	5.02162	3.65501	11.4285	0.000723259	0.0978941
Kif18b	8.99464	1.04507	11.4202	0.000726487	0.0978941
Csgalnact2	-2.6695	5.06241	11.3885	0.000738999	0.0983508
Slc12a6	-1.83191	6.52533	11.3323	0.000761707	0.0988626
Ifit3	4.02022	8.41969	11.3178	0.000767673	0.0988626
Kremen2	9.48198	1.32602	11.2894	0.000779529	0.0988626
Mastl	7.70074	1.92174	11.3001	0.000775009	0.0988626
Ranbp6	-3.21081	4.35217	11.2231	0.000807836	0.101261
Cdc37l1	-2.68745	4.81722	11.0784	0.000873402	0.106256
Ccnb1	4.23526	4.54405	11.0495	0.000887111	0.106256
Ifi27l2a	3.73109	9.1481	11.0598	0.000882196	0.106256
Pfkp	2.51827	7.04133	11.0907	0.000867596	0.106256
2010005H15Rik	9.51798	1.60203	10.9616	0.000930182	0.107821
Ms4a6d	2.91189	6.20997	10.9633	0.000929341	0.107821
Polr2i	3.73031	3.22204	10.9899	0.00091611	0.107821
Gm5960	9.67715	3.11089	10.9341	0.000944101	0.10827
Zfp608	-3.5088	2.95306	10.8632	0.000980959	0.111313
Aicda	10.9311	1.20009	10.8325	0.000997319	0.111991
Acod1	4.78485	6.37685	10.7434	0.00104651	0.116303
Hells	3.61952	3.8599	10.7223	0.00105851	0.116436
F9	-13.3497	1.80528	10.6886	0.001078	0.117383
Adrb2	-2.306	5.10284	10.6291	0.00111321	0.118815
Rlf	-1.74789	5.80531	10.6367	0.00110863	0.118815
Gab3	-4.03338	3.25847	10.5056	0.00119013	0.12578
mt.Nd2	-3.71367	6.52763	10.395	0.00126354	0.126657
Nfat5	-2.73462	4.76601	10.4394	0.00123359	0.126657
Kif2c	6.15146	3.32563	10.3702	0.00128066	0.126657
Il18bp	3.89745	5.28765	10.4073	0.00125519	0.126657
Klhl21	-2.95086	3.83446	10.4278	0.00124135	0.126657
Capn10	4.70424	2.37918	10.454	0.00122383	0.126657
Avl9	-2.06343	5.15178	10.3804	0.00127361	0.126657
Crisp3	-9.02928	1.63959	10.2822	0.00134319	0.131632
Ptges	8.10668	1.89489	10.2533	0.00136437	0.132503
Pgap1	-2.83319	5.31174	10.1702	0.00142726	0.134964
Usp18	2.58873	7.25146	10.1803	0.00141951	0.134964
Gtf2a2	-2.14824	5.38134	10.1751	0.00142348	0.134964
Nans	2.63722	5.34947	10.0458	0.00152696	0.136039
Cenpp	8.36333	2.03236	10.0929	0.00148838	0.136039
Glrx	3.6191	5.18387	10.0531	0.00152091	0.136039
Lcmt1	3.13859	3.95542	10.1184	0.00146795	0.136039
Gcdh	-3.62038	4.52681	10.1253	0.00146251	0.136039
Ap1s1	2.86938	3.96578	10.0762	0.00150195	0.136039
Coro1c	2.31068	5.07533	10.0572	0.00151756	0.136039
Rnh1	2.38988	7.06525	9.66455	0.00187858	0.136832
H2.T22	2.52997	8.75516	9.73327	0.00180963	0.136832
Sesn1	-1.76452	6.35986	9.7509	0.00179235	0.136832
Scoc	-3.96083	5.36017	9.86704	0.00168266	0.136832
Serpina3g	2.81629	8.0042	9.9155	0.00163892	0.136832
Gys1	6.23457	1.41199	9.81047	0.00173521	0.136832
Sp140	2.02705	7.54665	9.72156	0.00182119	0.136832
Psmb9	2.38998	6.86455	9.83611	0.00171119	0.136832
Zfp950	-2.54308	4.84678	9.94903	0.00160934	0.136832
Snapin	-2.28484	5.01468	9.92298	0.00163228	0.136832
Svip	-5.08205	2.53535	9.78845	0.00175611	0.136832
Filip1l	-1.95166	6.6085	9.77778	0.00176633	0.136832
Igf2bp3	8.02361	1.64449	9.84261	0.00170515	0.136832
Sycp2	-4.34444	2.28648	9.67626	0.00186664	0.136832
Tubgcp2	2.51688	4.22813	9.76698	0.00177674	0.136832
Clec2i	-2.3509	5.85974	9.8082	0.00173736	0.136832
Pask	8.05383	1.27573	9.96845	0.00159246	0.136832
Gfi1b	7.0149	1.43631	9.9004	0.00165243	0.136832
Tmem26	-7.02373	2.16462	9.71495	0.00182775	0.136832
Padi2	3.2901	3.33357	9.86156	0.00168768	0.136832
Taok1	-1.87213	5.71872	9.98971	0.00157417	0.136832
Gm12250	2.54719	6.90785	9.80517	0.00174022	0.136832
Gon4l	2.54509	3.97858	9.68975	0.00185299	0.136832
Slfn1	2.28478	7.15179	9.97367	0.00158794	0.136832
Pclaf	4.86792	5.26397	9.67708	0.00186581	0.136832
Stip1	2.42609	5.03382	9.67952	0.00186333	0.136832
Oas2	4.54832	4.86528	9.95194	0.0016068	0.136832
Edrf1	-2.25101	4.65236	9.62149	0.00192314	0.139137
Spdl1	7.15878	2.3648	9.59724	0.0019487	0.139612
Mtx3	-4.79961	2.92602	9.59074	0.00195561	0.139612
Crip1	2.7553	8.39563	9.56955	0.00197831	0.140304
Clec2g	12.1251	1.14007	9.54481	0.00200515	0.141087
Trpm7	-2.15281	5.79804	9.53534	0.00201553	0.141087
Ifi47	2.15522	8.65465	9.47804	0.00207946	0.143717
Ndrg2	-4.99051	4.63851	9.47624	0.0020815	0.143717
Lemd3	-2.96013	3.87571	9.46605	0.0020931	0.143717
Cdc25c	7.42315	1.81015	9.41621	0.00215076	0.145128
Ifitm10	9.96847	0.360131	9.41341	0.00215404	0.145128
Rasa4	3.01878	3.8774	9.427	0.00213814	0.145128
Ccnf	7.03994	2.25479	9.3857	0.00218685	0.146424
Uhrf1	5.48196	3.54249	9.29548	0.0022972	0.147475
Aif1	3.20177	4.50473	9.34188	0.00223976	0.147475
Gm5431	3.75818	4.54752	9.27974	0.00231702	0.147475
Capg	2.29763	6.72072	9.31765	0.00226957	0.147475
Ogfr	2.00883	6.95885	9.21892	0.00239526	0.147475
Pnisr	-2.0877	5.80527	9.22862	0.00238261	0.147475
Iigp1	4.15278	7.30418	9.17846	0.00244879	0.147475
Pstpip1	2.25007	6.41374	9.24021	0.00236757	0.147475
Kcnn3	12.4251	0.35561	9.20811	0.00240946	0.147475
Engase	5.1712	2.44517	9.24138	0.00236607	0.147475
Gm31718	7.02067	1.15194	9.33773	0.00224484	0.147475
Jmjd1c	-2.12035	5.70001	9.18297	0.00244277	0.147475
Upf2	-2.04649	5.11107	9.22434	0.00238819	0.147475
Atp5g2	2.38247	5.29403	9.3447	0.00223631	0.147475
Atrx	-2.12639	5.67159	9.1861	0.00243861	0.147475
Pbk	7.37525	2.96742	9.20249	0.00241686	0.147475
Cdk5rap1	-3.81402	3.40162	9.2594	0.0023429	0.147475
Pkp3	2.88568	5.05827	9.23221	0.00237795	0.147475
Pdap1	1.85111	5.21553	9.13133	0.00251269	0.148829
1700096K18Rik	-5.79446	1.70583	9.1488	0.00248881	0.148829
Ifi35	2.18685	6.97254	9.14119	0.00249919	0.148829
Akr1c6	-13.3971	3.78382	9.0912	0.00256843	0.148858
Zfp445	-1.8169	5.8283	9.11373	0.00253698	0.148858
Fmr1	-2.20886	5.11445	9.10903	0.00254351	0.148858
Kansl1l	-3.97838	3.77975	9.09839	0.00255834	0.148858
Wasl	-3.16337	3.21576	9.05438	0.00262066	0.149987
Mrgpra2a	6.9235	1.655	9.049	0.00262839	0.149987
Hspa2	6.30628	0.897176	9.04813	0.00262964	0.149987
Ppie	2.51168	4.34945	9.03839	0.00264368	0.149994
Kntc1	4.68101	2.90252	8.95813	0.00276238	0.15271
Tap1	2.12283	7.48037	8.9649	0.00275216	0.15271
Fen1	2.50281	4.74333	8.99579	0.00270602	0.15271
Erbin	-2.08499	6.63469	8.967	0.00274899	0.15271
Plk3	6.82589	1.94196	8.98108	0.00272789	0.15271
AA467197	6.69351	2.05912	8.93445	0.00279841	0.153131
Gars	2.02489	6.92273	8.94351	0.00278458	0.153131
Myh10	-8.47073	2.10718	8.89712	0.00285621	0.155505
Usf3	-2.6047	4.85065	8.86653	0.00290447	0.155772
Nmral1	3.91519	3.64431	8.86776	0.0029025	0.155772
Cdk13	-2.57296	4.42533	8.88028	0.00288268	0.155772
Zfp318	-2.26906	5.39955	8.84429	0.00294007	0.156901
Mmp13	-9.67503	2.05896	8.78243	0.00304146	0.161512
Plin2	2.31584	7.25693	8.74387	0.00310644	0.164154
Rapgef4	-3.22879	3.4585	8.67503	0.00322599	0.164452
H2.T.ps	4.00605	2.66467	8.67597	0.00322432	0.164452
Gpnmb	7.83968	0.749295	8.70491	0.00317353	0.164452
Stil	6.97069	2.09107	8.73061	0.00312912	0.164452
Aldh6a1	-3.89498	3.027	8.67548	0.00322521	0.164452
Plxna4os1	7.05748	1.3677	8.69051	0.00319872	0.164452
Zfp62	-2.12451	5.4607	8.71925	0.00314868	0.164452
Rom1	4.91696	3.21231	8.67045	0.00323412	0.164452
Fbxw17	4.23272	3.34974	8.64723	0.00327559	0.165779
Dennd1c	4.73779	2.71389	8.63748	0.00329317	0.16589
Gbp10	5.73919	3.56698	8.62706	0.00331206	0.166065
Cops7b	4.41625	2.24691	8.59692	0.00336732	0.166125
Rad51ap1	6.83466	2.6349	8.57559	0.003407	0.166125
Sc5d	-2.26637	4.88741	8.56052	0.00343531	0.166125
Gas2l3	6.73572	0.996342	8.54361	0.00346737	0.166125
Cpsf6	-1.58796	5.44694	8.59319	0.00337422	0.166125
Serpina3n	-13.7672	1.98688	8.54801	0.003459	0.166125
Ttc14	-2.13563	5.70189	8.56146	0.00343354	0.166125
Rrm1	2.16919	5.95083	8.54462	0.00346545	0.166125
Psmb10	2.8171	6.35857	8.56875	0.00341982	0.166125
Ces1c	-20.9343	5.44096	8.55503	0.00344569	0.166125
Fcor	8.81709	0.455691	8.5112	0.00352967	0.168362
Adap1	3.08522	4.1463	8.50101	0.00354949	0.168561
Ttr	-20.5632	6.55702	8.48992	0.00357119	0.168848
Anxa2	2.25031	9.09085	8.47789	0.00359489	0.169227
Gm4841	5.51152	4.11787	8.43087	0.00368903	0.171978
Psme2	1.98651	8.05167	8.42488	0.0037012	0.171978
Ubald2	2.5328	4.89361	8.42947	0.00369189	0.171978
Gc	-19.4175	6.69065	8.41116	0.00372924	0.172537
D030056L22Rik	-2.47336	4.41226	8.39341	0.00376584	0.173414
Psmb8	2.24648	8.53233	8.37869	0.00379645	0.173414
Oasl1	4.48303	5.15702	8.38108	0.00379148	0.173414
Chaf1a	5.0063	2.51339	8.35889	0.00383806	0.174575
Prpf39	-2.24372	4.94648	8.32588	0.00390841	0.175553
Melk	7.27247	2.88916	8.33872	0.0038809	0.175553
Gm36551	7.26417	1.65772	8.32914	0.0039014	0.175553
Lgals3	2.14996	7.89041	8.2659	0.00403967	0.180332
Gm28437	-2.82024	5.2537	8.26203	0.00404827	0.180332
Kcnj2	-3.3081	3.52192	8.22689	0.00412743	0.181589
Zbtb26	-4.15641	2.51596	8.21967	0.00414388	0.181589
Serpinb6b	3.47589	6.61345	8.24001	0.00409769	0.181589
Fbxl3	-1.95912	6.09816	8.23001	0.00412033	0.181589
Gt.ROSA.26Sor	-3.35283	3.683	8.20289	0.00418238	0.182535
Clec4a1	-5.42066	2.66617	8.16501	0.00427063	0.185634
mt.Nd1	-2.78357	9.19783	8.1309	0.00435172	0.1884
Gtf3a	1.81709	5.13096	8.12081	0.004376	0.188693
B230219D22Rik	-1.91525	5.32729	8.10239	0.00442068	0.18986
Uqcc1	2.24321	4.64784	8.07926	0.00447748	0.191537
Gm6545	5.11302	2.62155	8.0705	0.00449917	0.191704
Ivns1abp	-1.86045	6.81578	8.04706	0.00455776	0.193436
Bend6	8.0364	0.846958	8.03469	0.004589	0.193678
Serpina1a	-17.813	5.68433	8.03058	0.00459941	0.193678
mt.Cytb	-3.04894	9.73915	8.0162	0.00463606	0.194204
Pum2	-1.74101	7.11939	8.01157	0.00464794	0.194204
Tmem242	2.10074	4.51408	7.99419	0.00469277	0.19457
Snrpf	2.32188	4.78954	8.00109	0.00467491	0.19457
Ino80d	-2.42367	4.52008	7.96602	0.00476636	0.194626
Sp4	-2.67878	3.95839	7.96699	0.00476382	0.194626
Eif2a	1.94929	5.57591	7.97903	0.00473222	0.194626
Mcm5	3.39652	5.85324	7.97428	0.00474466	0.194626
Cd1d1	-2.23994	4.60803	7.94553	0.00482063	0.194944
Slc27a2	-8.78814	2.74362	7.94431	0.00482387	0.194944
Spp1	8.94909	2.72305	7.94262	0.00482838	0.194944
Ralgps2	-1.95321	6.48938	7.91664	0.00489821	0.196293
Ptpn1	1.92891	5.89782	7.92255	0.00488223	0.196293
Siglecg	-1.89705	5.62608	7.89296	0.00496276	0.198143
Fcgr4	2.56464	8.03634	7.88058	0.00499686	0.198768
Tnfrsf18	2.49271	4.43732	7.85986	0.00505444	0.200319
Sgo1	5.89944	2.48784	7.8468	0.00509106	0.200518
Lpgat1	-1.69784	5.64676	7.84482	0.00509665	0.200518
Il7r	-2.01953	6.22587	7.83743	0.00511754	0.200608
Rnf14	-2.65831	5.70366	7.81752	0.0051742	0.200664
Gbp5	3.93799	5.71316	7.80675	0.00520515	0.200664
Cul5	-1.79318	4.73125	7.82956	0.00513985	0.200664
Tmsb10	2.0267	7.09496	7.80436	0.00521204	0.200664
Snx13	-2.08923	4.59053	7.81155	0.00519132	0.200664
Pycard	2.62448	6.98303	7.78681	0.0052629	0.201901
Ncaph	6.93702	4.08093	7.77294	0.00530345	0.202735
Cenph	5.60473	1.88738	7.75221	0.00536467	0.203631
Fpgt	-2.94788	3.67912	7.75508	0.00535617	0.203631
Pck1	-14.8425	2.93545	7.74252	0.00539354	0.203773
Gmnn	4.17432	3.79803	7.73828	0.00540621	0.203773
Armc7	2.59939	4.4105	7.72356	0.00545047	0.204014
Mtf2	-1.82265	4.73995	7.72574	0.0054439	0.204014
Selplg	1.91242	7.02105	7.71062	0.00548968	0.204771
Natd1	5.31953	1.81166	7.70182	0.00551652	0.205062
Itih2	-11.3182	2.67202	7.66631	0.00562615	0.206996
4932441J04Rik	11.5004	0.229018	7.67188	0.0056088	0.206996
Mcm6	1.93805	6.99211	7.67479	0.00559976	0.206996
H2.Q7	2.30781	7.78604	7.64156	0.00570386	0.207769
Lin7c	-1.45985	5.48392	7.64121	0.00570497	0.207769
Cyp39a1	-7.2086	1.68155	7.6431	0.00569899	0.207769
Zbtb11	-2.12902	4.40007	7.62978	0.00574122	0.208385
Armc2	8.11548	0.453791	7.60676	0.005815	0.210355
Esm1	7.63628	1.60829	7.58342	0.00589075	0.212382
Stap1	-2.21097	6.18235	7.57014	0.0059343	0.212531
Lmnb1	3.22593	4.68975	7.57379	0.00592233	0.212531
Yipf1	1.89867	5.42005	7.5456	0.00601568	0.21262
Med16	3.85502	2.33808	7.55604	0.00598092	0.21262
Hk3	2.59396	4.91943	7.54734	0.00600987	0.21262
C1galt1	-1.74062	6.18397	7.55722	0.00597702	0.21262
Ung	5.5257	1.85119	7.51742	0.00611051	0.215266
Ifi44	3.5438	5.49152	7.50629	0.0061484	0.215895
Arid4b	-2.47722	5.05354	7.48907	0.00620746	0.217261
Ang	-9.63638	2.79982	7.44479	0.00636202	0.22195
Zfp961	-2.35632	3.99519	7.43148	0.00640926	0.222877
Dmtf1	-2.03595	4.96326	7.41852	0.00645561	0.223767
Kif3c	3.92348	2.77547	7.39648	0.00653516	0.225677
Tmem101	3.49339	2.57125	7.38303	0.00658423	0.225677
Casp12	6.30366	1.9058	7.38815	0.00656549	0.225677
Zfp942	-2.36713	4.30557	7.38023	0.00659447	0.225677
Rhoq	-2.07405	5.51135	7.34836	0.00671239	0.228986
Wars	2.62361	5.49872	7.33669	0.00675613	0.229751
Gbp3	2.068	7.08111	7.3306	0.00677904	0.229805
mt.Nd5	-3.21479	6.30244	7.31744	0.00682887	0.230769
Tmem14c	1.95077	6.13762	7.28473	0.00695431	0.232107
1500009L16Rik	7.15008	2.09168	7.23791	0.007138	0.232107
Tlr1	-1.55447	6.28233	7.29123	0.00692921	0.232107
Emp1	3.3439	4.13392	7.24585	0.00710652	0.232107
Crlf2	4.56612	2.42969	7.2905	0.00693202	0.232107
Tk1	4.08963	3.86788	7.25157	0.00708392	0.232107
Syne3	4.04773	3.26946	7.27215	0.0070032	0.232107
Cenpe	6.59076	3.94519	7.25957	0.0070524	0.232107
Smad7	-3.66111	1.89096	7.23068	0.00716679	0.232107
Ice2	-2.49953	3.95593	7.22452	0.00719143	0.232107
Hdac5	2.16985	4.32568	7.25	0.0070901	0.232107
Siva1	2.67488	3.01246	7.22733	0.00718018	0.232107
Trim44	-1.51078	5.44937	7.25832	0.00705734	0.232107
Hmmr	4.29442	3.59285	7.28363	0.00695857	0.232107
Gm41043	11.1884	1.21471	7.22633	0.00718418	0.232107
Usp34	-1.61379	6.50842	7.19243	0.00732117	0.235589
Gpr183	-1.81343	5.75547	7.17433	0.00739542	0.236566
Phldb1	7.70795	0.670818	7.17787	0.00738084	0.236566
Ddost	1.85757	6.73228	7.16847	0.00741958	0.236636
Malt1	-1.60046	6.5455	7.15222	0.00748711	0.237729
Ighg3	6.67089	2.55786	7.14963	0.00749795	0.237729
Gm43197	-4.19814	3.51114	7.13751	0.00754879	0.238639
Acp2	1.88304	5.09537	7.1072	0.00767751	0.241293
Esyt2	-1.53179	6.49378	7.10919	0.00766898	0.241293
Bambi	5.52234	0.840512	7.07963	0.00779653	0.241748
2610021A01Rik	-3.25283	3.13543	7.07749	0.00780582	0.241748
Vim	2.06824	9.2326	7.07274	0.00782653	0.241748
Cep126	-6.81533	1.82309	7.08688	0.00776503	0.241748
Il12rb1	3.65874	3.04752	7.08906	0.00775558	0.241748
Gabpb2	-1.62052	6.19545	7.09347	0.00773655	0.241748
Clk1	-1.95172	7.61478	7.067	0.00785166	0.241831
Upb1	-5.79319	2.32195	7.05439	0.00790713	0.242435
Aunip	8.16867	1.29244	7.05233	0.00791624	0.242435
Tgfbr1	-2.70893	4.51325	7.03137	0.0080094	0.244593
Bnip3	-3.13879	3.81398	7.0195	0.00806268	0.244884
Acox1	-3.0724	5.3065	7.01913	0.00806436	0.244884
Hpx	-22.6808	6.55187	6.9879	0.00820626	0.247797
Sccpdh	4.81072	2.25399	6.98963	0.00819832	0.247797
Rhov	8.31331	0.497369	6.97541	0.00826371	0.248142
Scd1	-2.46466	7.51213	6.97759	0.00825366	0.248142
B3gnt9	6.85807	0.493222	6.95939	0.00833803	0.249151
Prf1	2.9515	6.35506	6.95821	0.00834355	0.249151
Nlrc5	1.77115	7.2981	6.94922	0.00838557	0.249388
Fam234a	2.24235	4.7618	6.94663	0.00839775	0.249388
ist	-1.93895	7.78141	6.88783	0.00867844	0.251561
Pcmtd2	-1.98082	5.47373	6.88983	0.00866874	0.251561
G2e3	-2.41747	3.83422	6.89195	0.00865846	0.251561
Btaf1	-1.74419	5.76268	6.90974	0.00857277	0.251561
Acot7	2.24156	4.85268	6.92579	0.00849614	0.251561
Psat1	2.5618	4.95187	6.90034	0.00861794	0.251561
Irgm1	1.84676	8.25618	6.90546	0.00859329	0.251561
Gins3	2.8504	3.12042	6.90339	0.00860325	0.251561
2610008E11Rik	-2.6033	3.44105	6.88252	0.00870429	0.251561
Top2a	3.95734	6.82054	6.88719	0.00868157	0.251561
Irgm2	3.53475	5.17581	6.84205	0.00890364	0.256634
Npm3	1.68971	5.2928	6.8367	0.00893035	0.256718
Dnajc17	3.02247	2.96796	6.83107	0.00895856	0.256844
Phip	-1.92111	6.36114	6.82557	0.00898618	0.256952
Trib3	5.02087	1.02169	6.81124	0.00905858	0.257656
Ptpn7	2.01876	5.73803	6.81415	0.00904382	0.257656
mt.Nd4	-3.01124	8.83486	6.80183	0.00910644	0.258094
Hdc	2.92724	7.33433	6.79881	0.00912186	0.258094
Dhx34	3.59332	2.30612	6.7869	0.00918293	0.259141
Rrm2b	-2.45609	4.4619	6.76878	0.0092766	0.261101
Fam83d	5.92369	0.617735	6.75305	0.00935875	0.262727
Kif4	4.70977	3.92818	6.73965	0.00942933	0.264021
Rasal1	4.3813	1.3031	6.68407	0.00972784	0.266483
Gzmb	4.14367	8.87714	6.68189	0.00973973	0.266483
Pkm	2.07168	8.33804	6.68203	0.00973897	0.266483
Dopey1	-2.42653	4.74335	6.68455	0.00972523	0.266483
Tmem106a	2.94459	3.86955	6.68394	0.00972851	0.266483
Pik3c2a	-2.22972	4.8116	6.69684	0.00965842	0.266483
Vtn	-18.8326	4.64542	6.71025	0.00958601	0.266483
Tmem185b	-2.24793	3.75	6.69914	0.00964596	0.266483
Gm16104	7.36964	1.37209	6.71072	0.00958348	0.266483
Tmem161b	-2.86825	3.4099	6.65149	0.00990732	0.270382
Lipg	5.06525	2.91177	6.64423	0.00994777	0.2708
Plekha1	-1.67321	5.00264	6.63817	0.00998164	0.271038
Psmb5	2.15472	5.15167	6.63065	0.0100239	0.271501
Neurl1b	7.01018	1.02647	6.6232	0.0100659	0.271955
Nupr1	2.50537	4.79538	6.59392	0.0102327	0.2744
Galnt9	4.71587	1.49299	6.60159	0.0101888	0.2744
Klrg1	3.4395	5.79948	6.5941	0.0102317	0.2744
Gm33424	6.2953	0.762037	6.58372	0.0102915	0.275293
Cdk8	-2.07001	4.86313	6.57232	0.0103577	0.276113
Anxa8	6.95819	0.816598	6.55465	0.0104611	0.276113
Nat8f1	-4.82621	2.10792	6.56688	0.0103894	0.276113
Ramp3	7.56521	0.852613	6.55534	0.010457	0.276113
Dctn3	1.88194	5.08774	6.55212	0.0104759	0.276113
Cdk4	1.80577	5.71863	6.55398	0.010465	0.276113
Cdca8	3.75569	3.47997	6.51779	0.0106801	0.278135
Chmp1a	1.81348	6.52274	6.52507	0.0106365	0.278135
Gm6548	1.94502	5.02798	6.51499	0.0106969	0.278135
Snrnp35	4.53145	1.97268	6.52557	0.0106334	0.278135
Macf1	-1.59438	7.16289	6.50896	0.0107332	0.278135
Gmds	5.50907	2.30062	6.50921	0.0107317	0.278135
Edem3	-2.26562	4.49654	6.52841	0.0106165	0.278135
Tmem63b	-3.96713	2.34508	6.49713	0.0108049	0.278651
Rock1	-1.5553	6.39936	6.49916	0.0107925	0.278651
Tank	-1.56932	6.1404	6.4857	0.0108746	0.279781
H2.Ob	-1.67028	8.13315	6.4767	0.0109298	0.279865
Sik1	3.22294	2.98625	6.47986	0.0109103	0.279865
Pif1	5.53308	2.05336	6.46471	0.0110038	0.281053
Eml5	-3.83806	2.68448	6.46074	0.0110283	0.281053
Def6	1.85155	5.44988	6.45351	0.0110734	0.281535
Cnn3	-2.59236	5.80296	6.44145	0.0111488	0.281995
Kif20a	3.81693	4.20999	6.44503	0.0111263	0.281995
Zfp518a	-2.10679	4.38622	6.43808	0.0111699	0.281995
Gm37305	-3.28162	2.74304	6.42106	0.0112775	0.282726
Mzt1	-2.47408	5.43701	6.42423	0.0112574	0.282726
Abca1	-2.31139	4.5722	6.42105	0.0112776	0.282726
Pdia3	1.51602	7.70077	6.39675	0.011433	0.284636
Tubb5	1.89675	8.00377	6.3968	0.0114327	0.284636
Sars	1.58253	6.87821	6.40435	0.0113841	0.284636
Lin28a	6.81855	0.805278	6.38048	0.0115382	0.286595
Luc7l3	-1.66976	6.61229	6.3678	0.0116209	0.287985
Hormad2	-6.27785	1.19109	6.35277	0.0117198	0.288447
Ncapg	3.1291	4.27799	6.35505	0.0117048	0.288447
Serpinf1	-13.1253	2.57508	6.35413	0.0117108	0.288447
Slc30a5	-1.53655	5.87866	6.3237	0.0119135	0.29056
Alyref2	4.19036	1.66991	6.32409	0.0119109	0.29056
Sdc3	2.78164	5.19574	6.33425	0.0118428	0.29056
Sgf29	1.94703	3.58863	6.33039	0.0118686	0.29056
Rrp7a	2.10091	5.23105	6.31382	0.01198	0.290964
Tppp3	2.9672	5.59608	6.31323	0.0119841	0.290964
Adam15	3.26948	3.61722	6.30539	0.0120372	0.291597
Zbtb6	-2.2945	3.89583	6.30066	0.0120693	0.29172
Gbp7	2.13217	7.2091	6.29073	0.0121371	0.292283
1600014C10Rik	1.52058	6.72047	6.28536	0.0121739	0.292283
Mmel1	8.51025	2.11252	6.28699	0.0121628	0.292283
Rbck1	1.6144	6.1152	6.26447	0.0123183	0.295091
Ncapd2	2.61674	4.95357	6.24745	0.0124373	0.296687
Zzz3	-1.77818	5.36521	6.23535	0.0125225	0.296687
Il27	4.85725	1.83297	6.24484	0.0124556	0.296687
Nfil3	2.95933	4.27664	6.23586	0.0125189	0.296687
Fam129b	3.63594	3.63579	6.2411	0.0124819	0.296687
Cdk1	4.49328	4.69297	6.23038	0.0125577	0.296867
Gm6377	-4.59401	2.5112	6.21598	0.0126603	0.298638
Stoml1	2.15725	4.58672	6.21014	0.012702	0.298969
Gm28151	-4.29574	1.90321	6.17892	0.0129281	0.301074
Akt1	1.84325	5.36522	6.1848	0.0128852	0.301074
Bst1	2.92183	5.92188	6.17851	0.0129311	0.301074
Osbpl3	2.53386	4.48729	6.18076	0.0129147	0.301074
Mdm4	-1.75675	6.45693	6.18629	0.0128744	0.301074
Nudt17	5.62969	1.32637	6.14333	0.0131909	0.301412
Tubg1	2.57807	3.64244	6.15239	0.0131234	0.301412
Fam122b	-5.33355	2.1293	6.14978	0.0131429	0.301412
E130215H24Rik	5.2635	1.1063	6.15368	0.0131139	0.301412
Vangl1	-4.40895	4.86061	6.13966	0.0132183	0.301412
Chst3	-1.81714	6.27705	6.16424	0.0130358	0.301412
Fam199x	-4.47946	2.12067	6.1322	0.0132742	0.301412
Lman2	1.58977	6.37404	6.14652	0.0131671	0.301412
Mysm1	-2.15365	4.57125	6.1404	0.0132127	0.301412
Cst7	2.6642	5.14262	6.14162	0.0132036	0.301412
Tec	-1.60209	5.37366	6.13127	0.0132811	0.301412
Fam208b	-2.18304	5.28984	6.13679	0.0132398	0.301412
Psme1	1.56934	8.36856	6.1217	0.0133533	0.301778
Chic1	-4.40716	1.51555	6.12412	0.013335	0.301778
Pcmtd1	-1.92343	6.28447	6.10164	0.0135056	0.302562
Mfsd12	3.76105	2.58741	6.10795	0.0134575	0.302562
Iqcc	-2.11299	3.61223	6.10114	0.0135095	0.302562
Fads1	-4.32115	3.84242	6.10252	0.0134989	0.302562
Cnp	1.6885	7.13341	6.09868	0.0135283	0.302562
Slc16a3	2.71366	5.16309	6.08767	0.0136128	0.3027
1810026B05Rik	-1.64268	5.42511	6.08691	0.0136187	0.3027
Frat2	-3.96963	2.55007	6.08767	0.0136129	0.3027
Phyh	-2.00839	5.93704	6.08313	0.0136479	0.302724
Znrf3	-5.45578	1.79244	6.07002	0.0137496	0.304176
Arpc1b	2.00928	8.50728	6.06743	0.0137697	0.304176
Aprt	2.3494	5.17022	6.05416	0.0138736	0.305844
Lactb2	-2.31364	3.82415	6.04446	0.01395	0.306166
D930016D06Rik	-4.04162	2.74198	6.0415	0.0139734	0.306166
Lmbrd1	-1.38064	6.20309	6.04642	0.0139346	0.306166
Slc4a2	3.51781	2.334	6.0334	0.0140377	0.30695
Hsp90ab1	1.6801	7.84283	6.02725	0.0140867	0.307398
Orm1	-16.5642	4.59324	6.01192	0.0142096	0.309427
Spag1	5.87513	1.54029	6.00693	0.0142498	0.309427
Ext1	-1.78012	4.21072	6.00367	0.0142762	0.309427
Cd6	2.20335	5.02322	5.99786	0.0143232	0.309427
Dohh	4.23759	1.70363	6.00029	0.0143035	0.309427
2010111I01Rik	2.09223	4.7854	5.96794	0.0145682	0.311229
Fcer2a	-2.98314	5.42834	5.938	0.0148178	0.311229
Snw1	1.38999	6.81188	5.97211	0.0145339	0.311229
Prkrip1	2.54251	3.5682	5.92362	0.0149393	0.311229
Emp3	1.71029	6.54862	5.92572	0.0149214	0.311229
Pes1	1.70493	6.01646	5.9233	0.014942	0.311229
Parp10	2.00294	5.903	5.95286	0.0146934	0.311229
Rsf1	-2.02784	4.52281	5.94234	0.0147814	0.311229
Ccdc25	2.3398	4.8144	5.96003	0.0146338	0.311229
Fgg	-18.8573	5.45342	5.94014	0.0147999	0.311229
Ptbp2	-3.06757	3.87186	5.93832	0.0148151	0.311229
Ighv5.16	5.68988	1.33575	5.93331	0.0148573	0.311229
Prmt5	1.94061	5.07422	5.97444	0.0145147	0.311229
Fcrls	6.24845	2.48895	5.92114	0.0149603	0.311229
Snx7	5.72209	0.894369	5.95789	0.0146515	0.311229
Psen1	1.32087	6.05746	5.91834	0.014984	0.311229
Ifit1bl1	1.69388	7.64309	5.92696	0.0149109	0.311229
1110032A03Rik	-2.51351	5.66375	5.95602	0.0146671	0.311229
Txlng	-2.49902	3.4575	5.93596	0.014835	0.311229
Ybey	5.11845	1.34587	5.92275	0.0149466	0.311229
Tpx2	1.80412	5.27472	5.88331	0.015285	0.313646
po4	-1.88583	4.25828	5.88436	0.015276	0.313646
Smim4	3.7126	5.07744	5.88125	0.0153029	0.313646
Nfib	-11.0047	2.11137	5.87858	0.0153262	0.313646
Egln2	1.97368	4.63319	5.87444	0.0153622	0.313646
Ythdf3	-1.62854	6.07307	5.89587	0.0151764	0.313646
Rab1b	2.04022	4.68972	5.89497	0.0151841	0.313646
Capn7	-1.62867	5.72001	5.88299	0.0152878	0.313646
Cdca5	6.46384	2.58813	5.87719	0.0153383	0.313646
Hook3	-1.88462	4.89484	5.85409	0.0155409	0.315475
Atf2	-1.91479	5.19267	5.85092	0.0155689	0.315475
Pcf11	-1.52711	5.84036	5.85236	0.0155562	0.315475
Igsf8	4.18127	2.34281	5.85753	0.0155106	0.315475
Bcar3	-3.64588	2.62222	5.83974	0.0156681	0.316561
Aatk	4.2862	1.15965	5.83827	0.0156812	0.316561
Clybl	-4.09118	2.51529	5.81944	0.01585	0.319371
Ly75	-1.95576	3.99861	5.73764	0.0166051	0.32051
Tspoap1	5.78078	1.22218	5.76983	0.0163036	0.32051
Tgtp2	2.01019	9.01547	5.74577	0.0165284	0.32051
Heca	-1.7993	6.34805	5.78948	0.0161224	0.32051
Aph1b	-4.00588	2.36047	5.742	0.0165639	0.32051
AW112010	2.59494	8.74462	5.76643	0.0163352	0.32051
Aimp1	1.70819	5.91174	5.76811	0.0163196	0.32051
Blmh	1.57756	5.86431	5.76191	0.0163773	0.32051
4930522L14Rik	-3.16956	2.97982	5.80222	0.016006	0.32051
Siah1a	-2.43635	4.15184	5.77624	0.0162443	0.32051
Trmt61b	-3.70823	2.25073	5.75786	0.016415	0.32051
Fam234b	-5.46781	2.16781	5.75074	0.0164817	0.32051
Tfec	2.89983	3.02513	5.7769	0.0162381	0.32051
Aagab	1.42626	6.01499	5.7816	0.0161948	0.32051
Gmppb	2.9565	3.89102	5.8093	0.0159417	0.32051
Usb1	1.7214	5.11142	5.76404	0.0163575	0.32051
G0s2	4.11855	2.05146	5.76083	0.0163874	0.32051
Ptpn12	-2.03478	5.90338	5.77978	0.0162116	0.32051
Timeless	3.16887	3.34058	5.79519	0.01607	0.32051
Gm12258	-3.75907	3.49437	5.76076	0.0163879	0.32051
Gpi1	1.69284	7.10839	5.77049	0.0162975	0.32051
Slc15a3	2.37083	4.55046	5.74241	0.0165601	0.32051
Efnb2	9.3632	1.29724	5.74281	0.0165562	0.32051
Brms1l	-2.89932	3.1537	5.73605	0.0166201	0.32051
Eef1akmt1	1.96029	4.07427	5.72019	0.016771	0.320605
Haspin	3.19742	3.44984	5.72745	0.0167017	0.320605
2011-09-01	1.58095	5.7124	5.71678	0.0168035	0.320605
Lamtor4	1.95123	5.12713	5.72554	0.0167199	0.320605
1700030K09Rik	3.96404	2.97101	5.73161	0.0166622	0.320605
Dstyk	-2.56745	3.80513	5.71786	0.0167932	0.320605
Prelid3b	1.59107	4.91986	5.71008	0.0168678	0.321262
B3galnt2	-1.67918	4.84014	5.69972	0.0169676	0.321511
Pccb	-2.74328	3.5825	5.69944	0.0169703	0.321511
Wdr78	-5.13557	2.64105	5.70229	0.0169428	0.321511
Pikfyve	-1.76968	5.08753	5.69129	0.0170493	0.322441
9930111J21Rik2	-1.85388	5.48043	5.68149	0.0171448	0.323679
Samhd1	1.68078	9.38906	5.67629	0.0171957	0.324073
Crlf3	-1.39302	7.38306	5.66743	0.0172827	0.325145
Myof	2.57266	4.7602	5.65563	0.0173995	0.326139
Taok3	-2.71023	2.57471	5.63148	0.0176407	0.326139
Ly6a	2.23689	8.7326	5.6347	0.0176083	0.326139
Coq8a	-2.18685	3.78668	5.62873	0.0176684	0.326139
Cyp2f2	-16.2099	1.78334	5.63548	0.0176005	0.326139
Clic1	1.65442	8.40801	5.65733	0.0173825	0.326139
Spindoc	7.18187	0.789965	5.63924	0.0175628	0.326139
Gm13340	-2.89824	3.29102	5.64923	0.017463	0.326139
Yipf3	3.2889	2.72493	5.63969	0.0175583	0.326139
Otud4	-1.57992	5.47206	5.64691	0.0174862	0.326139
Prdx5	1.96687	7.98686	5.64513	0.0175039	0.326139
Itgb2l	5.49136	3.87614	5.62238	0.0177325	0.326216
Epsti1	1.40148	7.49904	5.62233	0.0177331	0.326216
Anxa4	1.88601	5.1687	5.59494	0.0180124	0.330791
Smarca4	2.06978	5.2311	5.5877	0.0180871	0.330844
Pgk1	1.51692	7.73406	5.58573	0.0181074	0.330844
Ctsd	1.83457	7.7344	5.58946	0.0180688	0.330844
Haus4	2.30861	4.06335	5.58269	0.0181388	0.330857
Podnl1	5.88653	2.66322	5.57854	0.0181818	0.331082
Ndufs8	1.62877	5.58291	5.56189	0.0183556	0.332391
Ifih1	1.80295	6.26589	5.56311	0.0183428	0.332391
Gm18853	3.94093	3.53943	5.56622	0.0183103	0.332391
Emilin1	3.31203	2.90515	5.55984	0.0183771	0.332391
Anp32e	-2.34784	7.0375	5.55225	0.0184569	0.333276
Il3ra	5.70253	1.01274	5.54661	0.0185165	0.333792
Ptprcap	1.64002	6.03819	5.53953	0.0185915	0.334028
Rtp4	1.83739	6.63465	5.54073	0.0185788	0.334028
Klhl20	-3.11363	3.01526	5.53187	0.0186731	0.334935
Gtf2f1	1.74478	5.47114	5.52396	0.0187578	0.335895
Trmt5	2.98148	3.65611	5.51443	0.0188602	0.33717
Psma4	1.50034	7.20744	5.50341	0.0189794	0.338458
Zfp944	-2.67295	3.85212	5.50197	0.0189951	0.338458
Cotl1	1.81612	7.2985	5.49603	0.0190597	0.339048
Gm9958	-4.68409	1.47241	5.48715	0.0191568	0.340214
Mdp1	1.41913	5.29895	5.48317	0.0192004	0.340429
Sympk	1.61123	4.79858	5.47187	0.0193249	0.342073
Hist1h4c	-4.69421	3.50438	5.46517	0.0193992	0.342825
Serp2	5.13451	1.30021	5.42162	0.0198889	0.343044
Rfx5	-2.11128	4.22755	5.45932	0.0194642	0.343044
Larp7	1.6834	5.27617	5.42383	0.0198637	0.343044
Rp2	-1.80753	5.98169	5.42252	0.0198786	0.343044
Cldn12	-8.06951	1.15289	5.45091	0.0195581	0.343044
Brip1	5.07152	2.80489	5.43044	0.0197887	0.343044
Rictor	-1.86482	4.88982	5.44176	0.0196608	0.343044
Mthfd2l	-5.01279	2.32479	5.44245	0.0196531	0.343044
Phgdh	2.34712	5.06089	5.45298	0.019535	0.343044
Tmem56	-10.586	1.84219	5.42556	0.0198441	0.343044
Gm6637	5.21106	3.11074	5.42326	0.0198702	0.343044
Bdp1	-2.02339	4.71512	5.42198	0.0198848	0.343044
Rex1bd	3.06571	3.06585	5.43203	0.0197706	0.343044
Smpdl3b	2.23701	6.05016	5.43985	0.0196823	0.343044
Zfp948	-4.3085	1.77378	5.43418	0.0197463	0.343044
Ccnt2	-1.47596	5.43309	5.40653	0.0200616	0.34521
Itm2c	1.69629	5.41951	5.40505	0.0200785	0.34521
krx	-4.49837	2.02185	5.3912	0.0202386	0.345756
Amdhd2	2.73553	3.68904	5.39371	0.0202094	0.345756
Utp3	1.57665	5.16629	5.39808	0.0201589	0.345756
Ttc12	7.78308	0.678816	5.39499	0.0201947	0.345756
Tet3	-2.46278	4.26063	5.37335	0.0204467	0.345892
Stxbp6	-5.10719	1.68388	5.37234	0.0204586	0.345892
Opa3	1.9303	4.15169	5.37126	0.0204711	0.345892
H2.DMb1	1.89409	5.05545	5.37875	0.0203834	0.345892
Ube2d1	-4.73487	1.17217	5.37144	0.020469	0.345892
Ppfia1	-2.75142	3.05936	5.3845	0.0203164	0.345892
Fam208a	-1.51109	5.55951	5.38408	0.0203213	0.345892
Cln6	4.98956	1.83499	5.36509	0.0205437	0.346575
Arl8a	3.20338	2.76893	5.36156	0.0205854	0.346735
Atrn	-2.17119	4.09263	5.32562	0.0210141	0.347566
Slfn9	2.73438	4.13193	5.32939	0.0209688	0.347566
Bbs4	4.13133	2.91826	5.34064	0.0208339	0.347566
Lysmd3	-2.26357	4.15805	5.3247	0.0210252	0.347566
Plec	2.15304	4.56245	5.34435	0.0207895	0.347566
Adpgk	-1.5369	5.0162	5.33689	0.0208787	0.347566
Itih3	-10.4038	3.62703	5.32233	0.0210539	0.347566
Hyi	-2.68538	2.45585	5.33049	0.0209555	0.347566
Edc4	2.12777	4.0865	5.34238	0.020813	0.347566
Chtf18	5.34084	0.9547	5.32464	0.0210259	0.347566
Nsd1	-1.31315	6.06553	5.34071	0.020833	0.347566
Irf1	1.86156	8.33598	5.33682	0.0208796	0.347566
Mlec	1.36675	6.86781	5.34868	0.0207379	0.347566
Gm39822	5.96952	0.500227	5.31789	0.0211075	0.347919
Stmn1	2.91019	5.58059	5.31188	0.0211805	0.348058
Lck	1.82749	7.89409	5.31296	0.0211674	0.348058
Parp12	1.80435	5.65034	5.30539	0.0212595	0.348528
Dus2	2.68429	3.60927	5.30422	0.0212738	0.348528
Osbpl7	6.13632	1.28019	5.29533	0.0213827	0.349781
Tubb6	2.33807	4.2889	5.27861	0.021589	0.349842
Col4a3bp	-1.46046	5.47139	5.28923	0.0214578	0.349842
Sfswap	-1.75181	4.15466	5.28133	0.0215553	0.349842
Fanca	2.71925	3.58204	5.27662	0.0216136	0.349842
Taf10	1.27943	6.20049	5.28162	0.0215517	0.349842
Gpr174	-2.21869	4.97289	5.2809	0.0215606	0.349842
Galk2	1.99238	4.78249	5.27854	0.0215898	0.349842
Trbv13.2	2.69416	3.2849	5.26639	0.021741	0.35024
Retreg1	-1.3607	5.65252	5.24032	0.0220692	0.35024
Kbtbd8	-2.7772	2.54252	5.25588	0.0218727	0.35024
Pi4k2b	-2.34851	5.12118	5.24303	0.0220348	0.35024
Zfp945	-1.78691	5.00922	5.25925	0.0218305	0.35024
D17H6S53E	3.13826	3.73208	5.2427	0.022039	0.35024
Zbtb1	-1.69272	4.78567	5.23844	0.0220931	0.35024
Cchcr1	5.87718	1.80736	5.2483	0.0219682	0.35024
Nmi	1.60366	6.43279	5.27059	0.0216887	0.35024
Hmox2	1.44712	6.00013	5.2479	0.0219733	0.35024
Trim23	-2.42396	4.00337	5.25042	0.0219414	0.35024
Noct	-2.31195	3.872	5.25187	0.0219233	0.35024
Fam20a	8.2032	1.62516	5.25501	0.0218837	0.35024
Cenpb	2.01262	4.90243	5.24783	0.0219742	0.35024
Serpina1d	-18.9695	5.71683	5.22923	0.0222104	0.351583
Amigo1	6.16056	1.55672	5.22272	0.0222936	0.352383
Shmt2	2.16822	4.08022	5.20808	0.0224821	0.352627
Tmx4	-1.75161	4.34191	5.20124	0.0225707	0.352627
Gbp8	1.732	5.82127	5.20563	0.0225138	0.352627
Pvrig	6.59639	0.939014	5.21036	0.0224527	0.352627
Zfp715	-1.80871	4.96863	5.21125	0.0224412	0.352627
Dennd6a	-1.56646	5.41931	5.21158	0.0224369	0.352627
Zfp397	-2.00862	4.61931	5.21659	0.0223723	0.352627
Fbxl4	-3.04497	3.33431	5.20217	0.0225587	0.352627
Rbm39	-1.47476	8.28518	5.18999	0.0227173	0.354404
Pole2	3.40208	2.82193	5.18449	0.0227894	0.354518
Tnfrsf9	3.8677	3.72135	5.1819	0.0228233	0.354518
Hcar2	3.31797	4.50785	5.18372	0.0227995	0.354518
Fcgr1	2.75185	5.35811	5.16795	0.0230073	0.355449
Rad17	-1.38088	4.77955	5.16952	0.0229866	0.355449
Snd1	1.56025	5.48742	5.16736	0.0230152	0.355449
Maged2	3.14146	5.37515	5.17372	0.022931	0.355449
Serpina1b	-15.0029	6.47219	5.16055	0.0231055	0.356334
B130034C11Rik	-6.39258	0.68385	5.1553	0.0231756	0.356904
Mydgf	1.81114	4.82959	5.14822	0.0232703	0.356959
Npc2	1.53501	8.09549	5.14833	0.0232688	0.356959
Tnni2	5.03126	1.2293	5.14749	0.02328	0.356959
Fgfr1	7.38952	1.35343	5.14513	0.0233116	0.356959
Clspn	6.14186	2.26835	5.11053	0.0237811	0.357546
Kpna2	1.76954	6.41249	5.11106	0.0237738	0.357546
Npepl1	1.53627	4.73697	5.1274	0.023551	0.357546
Layn	-4.78596	1.78505	5.11213	0.0237592	0.357546
Eif6	1.71279	5.8234	5.11082	0.0237771	0.357546
Gbe1	-1.96855	4.19691	5.12796	0.0235434	0.357546
Tmem106b	-1.54613	5.85972	5.12461	0.0235888	0.357546
Atg7	2.18614	4.13471	5.13449	0.023455	0.357546
Chit1	5.72608	0.943723	5.11054	0.023781	0.357546
Nubp2	1.80481	5.37095	5.13929	0.0233902	0.357546
Slc9a3r2	6.03473	2.27021	5.11087	0.0237765	0.357546
Zfp131	-1.69021	4.90392	5.12303	0.0236104	0.357546
Ddah1	-13.7927	1.09905	5.13197	0.0234891	0.357546
Poc1a	4.28719	2.42151	5.10321	0.0238816	0.35776
Kbtbd2	-1.65084	5.08993	5.10556	0.0238492	0.35776
Cmpk2	1.66132	7.02659	5.10225	0.0238949	0.35776
5830468F06Rik	3.92076	2.33207	5.08878	0.0240811	0.358668
Mocos	3.08162	3.96594	5.08896	0.0240786	0.358668
Ighd	-1.65568	7.02936	5.08371	0.0241516	0.358668
Cog7	2.37065	3.30006	5.09363	0.0240138	0.358668
Ikbkb	-1.26043	5.97264	5.08483	0.0241361	0.358668
Cdo1	-11.5261	4.13848	5.08345	0.0241552	0.358668
Stra6l	-12.9252	1.37335	5.07894	0.0242182	0.359109
4930599N23Rik	5.94563	1.43687	5.06037	0.024479	0.359737
Frmd4b	2.24372	4.581	5.03563	0.0248311	0.359737
Olfm4	6.10789	2.92933	5.0421	0.0247385	0.359737
Gm43860	4.86788	1.04259	5.04389	0.0247129	0.359737
Dusp5	2.30493	4.13126	5.01964	0.0250614	0.359737
Ppp4r3b	-1.29746	6.89936	5.02431	0.0249939	0.359737
Med8	1.63242	5.46925	5.02294	0.0250136	0.359737
Plod3	1.89333	4.94609	5.06631	0.0243953	0.359737
H13	1.3699	5.52096	5.042	0.0247399	0.359737
Car5b	5.00598	3.32864	5.03911	0.0247812	0.359737
Insig2	-2.27925	3.60207	5.05397	0.0245696	0.359737
Cryba4	7.11488	0.751059	5.05722	0.0245236	0.359737
Cd2ap	-1.62657	5.96012	5.01983	0.0250587	0.359737
Katnb1	3.24852	2.53343	5.02961	0.0249175	0.359737
Foxm1	5.64523	0.962905	5.06699	0.0243857	0.359737
Ticrr	6.08676	0.648849	5.0342	0.0248515	0.359737
Nbeal1	-2.74468	3.01621	5.0325	0.024876	0.359737
Oasl2	2.75704	9.58328	5.02404	0.0249977	0.359737
E2f1	5.25975	1.42371	5.03106	0.0248966	0.359737
Kpna4	-1.33984	5.95103	5.0551	0.0245536	0.359737
Bpnt1	-2.03766	3.50719	5.04934	0.0246353	0.359737
Plac8	1.97032	10.284	5.0666	0.0243911	0.359737
Gzma	2.46758	9.50551	5.06088	0.0244718	0.359737
Dhx8	-1.18264	5.54484	5.07111	0.0243278	0.359737
Gm14085	-2.60997	3.9639	5.00389	0.0252904	0.36254
Bcl3	4.65222	0.835973	5.00019	0.0253446	0.362835
Clk4	-1.4462	5.7802	4.99339	0.0254444	0.36378
Crebrf	-1.37819	6.24436	4.98207	0.0256114	0.365683
5430425K12Rik	-7.13659	0.996605	4.97808	0.0256704	0.366041
Rdh10	-3.07393	2.48736	4.95956	0.0259468	0.366108
Dok2	2.08464	5.56683	4.97066	0.0257809	0.366108
Zfp983	-3.3285	2.66766	4.96343	0.0258888	0.366108
Arhgap17	-1.79224	3.9497	4.95991	0.0259416	0.366108
Fndc10	8.40697	0.414871	4.9667	0.0258399	0.366108
Cdc20b	6.82667	0.715163	4.96864	0.0258109	0.366108
Trbv1	3.82926	2.74752	4.96087	0.0259271	0.366108
Ier5	-1.24981	6.08629	4.97358	0.0257373	0.366108
Suv39h2	5.7225	1.25837	4.95446	0.0260235	0.366441
Lcn2	3.52455	6.40398	4.9507	0.0260802	0.366441
Gm20234	7.21519	0.122782	4.94896	0.0261064	0.366441
Gga2	-1.49504	5.53999	4.95276	0.0260491	0.366441
Spag5	4.42883	3.50664	4.93921	0.0262541	0.368035
Ccdc88b	2.25566	5.34829	4.92961	0.0264003	0.368703
Klhl28	-2.01464	4.12864	4.9338	0.0263363	0.368703
Tnfrsf13b	-1.56732	5.57741	4.92934	0.0264043	0.368703
Kyat1	-3.58369	2.30677	4.92518	0.0264681	0.369115
Ints6	-1.39788	4.75277	4.91037	0.0266959	0.371812
Metrn	3.79063	2.09733	4.88913	0.0270263	0.37496
Gimap8	-1.32886	7.30897	4.8907	0.0270017	0.37496
Gm10925	-2.45097	3.98407	4.89045	0.0270056	0.37496
Kcnip3	5.28679	1.18774	4.86533	0.0274015	0.377434
Crot	-1.38171	5.8057	4.87307	0.0272789	0.377434
Kdm3a	-1.43249	5.73783	4.8645	0.0274148	0.377434
Eea1	-2.10795	4.08332	4.86708	0.0273738	0.377434
Adrm1	2.3755	3.26014	4.87501	0.0272483	0.377434
Mcemp1	2.09124	7.52766	4.87091	0.0273132	0.377434
Psmd13	1.33458	6.38773	4.85748	0.0275266	0.37766
Ascc2	1.78828	4.8161	4.8528	0.0276014	0.37766
Phc3	-1.79863	4.89051	4.85312	0.0275961	0.37766
Arhgap9	1.32621	7.0814	4.85535	0.0275605	0.37766
Gm47572	-5.25431	1.0589	4.85248	0.0276064	0.37766
Tarm1	2.85693	3.38923	4.83543	0.0278808	0.380931
Prr11	5.44189	1.44374	4.82667	0.0280227	0.382386
Flot2	2.30836	3.68499	4.80987	0.0282972	0.384671
Ttpal	-1.29075	6.30907	4.81235	0.0282564	0.384671
N4bp1	1.51121	4.93176	4.81191	0.0282638	0.384671
Pcyt1b	3.47218	3.15446	4.80711	0.0283425	0.384801
Gm37387	-5.03155	2.28459	4.80046	0.0284522	0.385794
Ckap2	3.05043	3.29815	4.79722	0.0285058	0.385794
Eif2ak4	-1.89843	3.88724	4.79618	0.028523	0.385794
Lrrk1	1.82823	4.45428	4.77657	0.0288496	0.389722
Rhog	1.41466	5.17816	4.77008	0.0289584	0.390703
Trem1	2.28984	6.10671	4.76712	0.0290083	0.390886
Rapgef6	-1.22252	6.84488	4.7649	0.0290457	0.390902
Mcm3	2.23838	5.64957	4.75768	0.0291678	0.392056
Pbld1	-9.84263	1.44221	4.75541	0.0292063	0.392084
Dnajc16	-2.56083	2.4547	4.73666	0.0295263	0.392593
Gcc2	-1.73732	4.20918	4.74113	0.0294498	0.392593
Angptl3	-11.1634	3.10598	4.73601	0.0295375	0.392593
Sbf2	-3.11859	2.30427	4.75093	0.0292825	0.392593
Uba7	1.63103	6.89025	4.73766	0.0295092	0.392593
Mpnd	1.86534	4.93078	4.7438	0.029404	0.392593
H2.T24	1.305	6.77776	4.73189	0.0296084	0.392593
Cecr2	-3.84391	2.05899	4.74649	0.0293581	0.392593
Pkig	-3.31694	3.36508	4.74601	0.0293663	0.392593
Ehmt1	-1.58058	4.41886	4.73222	0.0296026	0.392593
Serpina1e	-17.9822	3.39147	4.72894	0.0296591	0.392783
Coro1b	1.5946	6.82321	4.72657	0.0297	0.392842
Ifi30	1.43105	7.6247	4.72115	0.0297938	0.3936
Chm	-2.08902	4.28261	4.71861	0.0298379	0.3937
Arl8b	1.53478	5.93805	4.70503	0.0300745	0.396189
Snx3	-2.1838	7.01476	4.69935	0.030174	0.396189
Appbp2	-1.35717	5.05208	4.70002	0.0301623	0.396189
Prtn3	5.3079	2.04895	4.69834	0.0301918	0.396189
Ythdc1	-1.89582	4.69229	4.69728	0.0302103	0.396189
Hcls1	1.46917	7.74326	4.69435	0.030262	0.396385
Agtrap	1.58445	5.14567	4.67406	0.0306214	0.396938
Gm42547	-4.79599	1.30961	4.67732	0.0305634	0.396938
Ighv5.6	3.81292	1.42127	4.66958	0.0307014	0.396938
Med21	-1.80034	4.88278	4.68383	0.0304478	0.396938
mt.Co3	-2.76495	2.94759	4.68659	0.030399	0.396938
Tpk1	-4.40848	1.57985	4.67191	0.0306599	0.396938
Trap1	1.58085	5.45294	4.66914	0.0307093	0.396938
Zfp758	-2.38583	4.25892	4.68208	0.0304788	0.396938
Slc25a11	1.22898	6.38315	4.68509	0.0304254	0.396938
Crebzf	-1.76609	5.33707	4.67042	0.0306864	0.396938
Clcn4	-1.31728	5.74813	4.67545	0.0305967	0.396938
B3galt6	4.2157	2.1136	4.66558	0.030773	0.397152
Asna1	1.45362	5.89703	4.66276	0.0308236	0.397152
Ppp1r35	3.42461	1.51004	4.66205	0.0308363	0.397152
Ppp4c	1.35639	6.67133	4.65798	0.0309095	0.397618
Ap2a2	1.17997	5.84717	4.65523	0.0309591	0.397781
Gbp11	4.47636	2.82624	4.64237	0.0311918	0.398871
Psmb6	1.41258	6.5248	4.64325	0.031176	0.398871
Slc31a2	2.35883	4.98151	4.64422	0.0311582	0.398871
Msr1	2.88092	6.16179	4.64779	0.0310936	0.398871
Ecd	1.46237	5.2078	4.63833	0.0312654	0.399048
Ccdc167	3.36817	3.1432	4.62494	0.0315104	0.399048
Slc52a3	4.94857	0.823367	4.62339	0.0315388	0.399048
Naa30	-1.75114	4.82526	4.62422	0.0315237	0.399048
Mtch1	1.77349	4.75256	4.62804	0.0314535	0.399048
Stk3	-2.45734	5.49929	4.62849	0.0314452	0.399048
Ephx1	-1.47732	5.1509	4.63616	0.0313049	0.399048
Cnot10	1.65951	4.70505	4.62362	0.0315346	0.399048
Grk3	-2.39764	5.23836	4.63084	0.0314021	0.399048
Gm11585	4.20114	1.33399	4.61614	0.0316724	0.399725
Otub1	1.7538	4.44946	4.61445	0.0317036	0.399725
Plg	-17.6185	3.69436	4.61556	0.0316831	0.399725
C1qb	5.13624	4.91268	4.60383	0.0319006	0.39987
E2f8	7.30074	0.61705	4.60551	0.0318694	0.39987
Tmem181b.ps	-3.76958	2.01015	4.61011	0.0317839	0.39987
H2.D1	1.84851	11.5845	4.60482	0.0318821	0.39987
Pnpla7	-1.6446	4.20058	4.60686	0.0318442	0.39987
Mif	2.26635	4.32354	4.60179	0.0319385	0.399881
Ifi206	1.59549	6.38948	4.59909	0.0319889	0.400047
Inpp5f	-1.47616	4.7993	4.58976	0.0321634	0.401299
Tbc1d8	-2.45571	4.37831	4.59035	0.0321524	0.401299
H2.T23	1.55566	8.97144	4.56132	0.0327019	0.401634
Osm	4.35284	2.93529	4.57358	0.0324687	0.401634
Dpp3	1.67784	5.33594	4.56079	0.0327119	0.401634
Crybg1	1.34515	6.16707	4.56994	0.0325377	0.401634
Araf	-1.41677	4.71231	4.56362	0.0326579	0.401634
Snx8	1.68411	4.55855	4.57557	0.032431	0.401634
Pank2	-1.34059	5.14537	4.56646	0.0326039	0.401634
Kif11	4.08067	5.43258	4.58275	0.0322954	0.401634
Dnase1l2	6.06975	1.54055	4.58045	0.0323387	0.401634
Tmed9	1.49654	5.78878	4.567	0.0325935	0.401634
Dpagt1	3.08495	2.94801	4.57021	0.0325326	0.401634
Zfp784	4.43375	1.73937	4.5616	0.0326966	0.401634
Gsta3	-10.8291	4.22426	4.56978	0.0325407	0.401634
Ubp1	-1.38504	6.4914	4.56694	0.0325948	0.401634
Prss34	4.35312	2.81914	4.55311	0.032859	0.40298
Thap2	-3.68271	3.12836	4.54792	0.0329588	0.403389
Slc25a19	1.80923	4.41505	4.54749	0.0329671	0.403389
Nudc	1.59297	5.30173	4.54303	0.0330531	0.403982
Rab20	3.26492	3.16525	4.53986	0.0331143	0.404272
Epm2aip1	-2.34603	4.27975	4.52078	0.0334855	0.405809
Samd8	-2.12388	3.59155	4.52608	0.0333821	0.405809
Cndp2	1.68488	6.30394	4.52524	0.0333984	0.405809
Aurka	3.55548	2.89284	4.51827	0.0335347	0.405809
Osbpl8	-1.75308	6.98284	4.51834	0.0335334	0.405809
Eml2	2.4354	3.01469	4.52017	0.0334976	0.405809
Rsrp1	-1.49506	8.06207	4.51793	0.0335413	0.405809
Ivd	-1.9139	4.47976	4.52111	0.0334791	0.405809
Uap1l1	2.09453	3.77699	4.51102	0.0336772	0.406923
Metrnl	1.86686	4.86113	4.50941	0.0337089	0.406923
A930009A15Rik	6.01602	0.767485	4.50499	0.0337962	0.40752
G530011O06Rik	4.2541	0.631253	4.50083	0.0338785	0.408056
Gpatch3	2.37587	2.55716	4.48413	0.034211	0.411142
BC043934	-3.3697	2.43494	4.48427	0.0342081	0.411142
1600002K03Rik	3.07386	2.72454	4.47907	0.0343123	0.411443
Tbx21	2.49399	4.7084	4.48047	0.0342842	0.411443
Psmb3	1.56485	6.97976	4.4766	0.034362	0.41158
H2.Q10	-3.23658	6.27807	4.47027	0.0344896	0.412651
Suco	-1.5316	5.51787	4.46004	0.0346966	0.414667
Cenpq	-2.78104	6.11951	4.45487	0.0348019	0.415141
Spaca9	6.09047	1.50734	4.45431	0.0348133	0.415141
Park7	1.3573	6.15224	4.44272	0.0350503	0.417505
Gm28661	-2.72895	4.27133	4.43443	0.0352211	0.419076
4930455G09Rik	5.09968	2.05497	4.43159	0.0352796	0.41931
Elof1	1.71608	4.75565	4.4288	0.0353373	0.419534
Strn3	-1.72412	4.4259	4.42351	0.0354471	0.420374
Apoa2	-15.3433	6.69735	4.42083	0.0355028	0.420572
Ttll5	4.38119	0.63672	4.41855	0.0355503	0.420672
Abat	-7.68542	1.79022	4.41641	0.0355948	0.420737
Mad2l1bp	1.69544	4.70372	4.41408	0.0356434	0.42085
A130071D04Rik	5.06417	1.11963	4.41151	0.0356973	0.421025
Kbtbd7	-2.47609	3.54562	4.40855	0.0357592	0.421294
Anxa6	1.75087	8.69408	4.401	0.035918	0.422703
Dmxl2	-3.0018	3.44845	4.39576	0.0360284	0.42354
Cnr2	-1.28425	5.84372	4.393	0.0360868	0.423764
Prpf4b	-1.36983	6.4069	4.38583	0.0362388	0.424285
Gas7	1.94545	4.40969	4.38807	0.0361913	0.424285
Bank1	-1.48313	7.09623	4.38534	0.0362492	0.424285
Rasgrp3	-2.29518	4.6215	4.38036	0.0363554	0.424606
Bad	2.14905	3.41101	4.38189	0.0363227	0.424606
Cdca2	4.24048	3.16661	4.35738	0.0368489	0.42624
Washc4	-1.27901	5.61559	4.36734	0.0366341	0.42624
Ctsc	1.3635	8.185	4.36239	0.0367407	0.42624
Tagln2	1.43449	7.80894	4.35598	0.0368792	0.42624
Cxxc5	-2.47003	3.55517	4.36726	0.0366358	0.42624
Aldh1a7	-7.68516	2.5112	4.35745	0.0368474	0.42624
4933407K13Rik	7.5827	1.13563	4.3573	0.0368508	0.42624
Itgae	-2.91645	2.95681	4.36592	0.0366647	0.42624
Stxbp2	1.45855	5.16176	4.35545	0.0368907	0.42624
Myo1f	1.54038	7.15882	4.36656	0.0366509	0.42624
Anxa9	5.17735	1.00249	4.34575	0.0371013	0.428214
Parp3	1.61222	4.17583	4.34285	0.0371647	0.428488
Dhx58	2.30102	5.6811	4.33766	0.0372781	0.429335
Gstm1	-3.78118	4.7342	4.33561	0.0373231	0.429395
Pilrb1	1.3191	5.64348	4.3279	0.0374925	0.430425
Hace1	-1.8569	4.53312	4.32832	0.0374833	0.430425
Mst1	-7.15538	1.84159	4.32289	0.037603	0.43089
Flot1	1.38034	5.45592	4.3211	0.0376425	0.43089
Trim59	-2.23539	7.11756	4.32063	0.0376529	0.43089
Atp11a	2.11615	3.96032	4.31804	0.0377103	0.431089
2810403A07Rik	-1.51657	5.51675	4.3137	0.0378068	0.431277
Me2	1.26059	6.15336	4.31541	0.0377687	0.431277
Map3k8	-1.83804	4.48801	4.30407	0.0380213	0.433266
Ube2g1	-1.73323	4.9129	4.29801	0.0381569	0.433894
Ifi211	1.85842	5.86627	4.2981	0.0381549	0.433894
Utp14a	1.07465	5.8744	4.29592	0.0382038	0.43397
Zfyve16	-1.84846	3.88296	4.29362	0.0382557	0.434102
Rps6ka3	-1.10323	6.05476	4.29053	0.0383253	0.434434
Lacc1	4.9039	0.966714	4.28659	0.0384141	0.434983
Arid4a	-1.52779	5.18246	4.27363	0.0387082	0.435059
Pik3r6	2.2449	3.91298	4.27593	0.0386557	0.435059
Mcm7	1.80091	5.94905	4.27671	0.038638	0.435059
Lsm4	1.38754	5.09874	4.274	0.0386997	0.435059
Lcorl	-2.78024	2.88677	4.27207	0.0387437	0.435059
Enoph1	2.26423	3.11815	4.28207	0.0385164	0.435059
dh	1.63058	7.41984	4.27212	0.0387426	0.435059
Urb1	-2.41901	3.07804	4.2808	0.0385452	0.435059
Fbxw7	-1.23444	4.79924	4.26746	0.0388489	0.435786
Pigr	-9.15545	2.89528	4.25604	0.0391111	0.435852
Las1l	-1.43419	4.23477	4.24962	0.039259	0.435852
Rnase4	-4.02663	4.52141	4.26497	0.038906	0.435852
Abca13	5.44126	1.22377	4.25122	0.0392223	0.435852
Nhp2	1.90499	4.76442	4.25915	0.0390395	0.435852
Ckb	2.9525	3.25325	4.24981	0.0392548	0.435852
Rbm48	-2.25371	3.4022	4.25414	0.0391547	0.435852
Fcho2	-1.92864	5.26391	4.25404	0.0391571	0.435852
Ace	-2.74225	4.52482	4.25552	0.0391229	0.435852
Ccdc163	4.38103	2.55435	4.25326	0.0391751	0.435852
Mllt10	-1.71525	4.08123	4.23931	0.0394983	0.43658
Prelid1	1.51032	7.10876	4.23754	0.0395395	0.43658
4833420G17Rik	-1.28881	6.63204	4.23288	0.039648	0.43658
Sec24a	-2.40549	3.44895	4.23625	0.0395694	0.43658
Mylip	-1.39096	6.1386	4.23231	0.0396615	0.43658
Tmem143	4.67927	1.41848	4.23109	0.03969	0.43658
pc	-1.46762	4.71541	4.23612	0.0395726	0.43658
Tnfaip3	1.81091	4.8199	4.22939	0.0397296	0.43658
Mvp	1.94674	5.90256	4.2398	0.0394868	0.43658
P2ry10	-1.24619	6.63975	4.24267	0.0394201	0.43658
Psmc3	1.20114	7.13429	4.22437	0.0398474	0.436956
Hat1	1.34522	5.40542	4.22359	0.0398657	0.436956
Rrnad1	-2.2643	2.79053	4.22275	0.0398854	0.436956
Exo1	5.46514	2.21426	4.21048	0.0401751	0.439237
Megf9	-2.11393	3.70388	4.21189	0.0401417	0.439237
Mri1	2.09196	3.9246	4.20768	0.0402412	0.439514
Orai3	1.56188	5.07151	4.19635	0.040511	0.440808
Serpinb9	2.09494	6.57355	4.19615	0.0405158	0.440808
Plpp2	3.22611	1.83577	4.19584	0.0405233	0.440808
Rnaseh2a	1.8	4.51155	4.19697	0.0404962	0.440808
Fbxo11	-1.62098	4.84627	4.18948	0.0406755	0.442018
Ces1d	-7.49529	2.38834	4.18743	0.0407248	0.442109
Nr2c2ap	2.37897	3.15383	4.1799	0.0409061	0.44363
Serpina1c	-13.9447	6.31119	4.17768	0.0409597	0.443765
Kxd1	1.7144	5.50848	4.17271	0.0410799	0.44462
Anxa5	1.14614	6.82083	4.16925	0.0411641	0.444882
Unc119	1.61211	6.10511	4.16662	0.041228	0.444882
Pcif1	1.5761	3.95839	4.16749	0.0412067	0.444882
Ckap2l	3.68905	3.30492	4.1554	0.041502	0.446402
Bend5	-2.51848	2.94981	4.14733	0.0417001	0.446402
Mfsd1	1.12538	6.23984	4.14784	0.0416876	0.446402
Nup214	2.25365	3.53723	4.15198	0.0415858	0.446402
Bcl2a1a	-2.46749	3.72189	4.15082	0.0416144	0.446402
Ccnd2	1.2016	6.16581	4.1559	0.0414898	0.446402
Pola1	1.92327	4.03078	4.1485	0.0416715	0.446402
Dpp7	2.19734	3.37392	4.15525	0.0415057	0.446402
Pign	-1.44701	4.38483	4.14422	0.0417769	0.446528
Ripk3	1.76129	4.74196	4.1435	0.0417947	0.446528
Sart1	1.45764	5.27112	4.13692	0.0419573	0.447379
Gle1	1.91289	4.83421	4.1379	0.0419331	0.447379
Ykt6	1.23051	6.09442	4.12848	0.0421672	0.44793
Tmem135	-1.67646	4.03115	4.13272	0.0420617	0.44793
Stard3	1.54294	4.92264	4.12899	0.0421546	0.44793
Mrpl19	1.41645	4.60812	4.12816	0.0421752	0.44793
Igkv10.96	-4.77539	1.76179	4.10945	0.0426441	0.448955
Prpf19	1.33247	6.30909	4.11617	0.0424752	0.448955
Cdkn2aip	-1.79204	3.97337	4.10771	0.0426882	0.448955
Thyn1	2.59061	3.7739	4.12004	0.0423782	0.448955
Tbcc	3.16904	2.68433	4.11634	0.0424709	0.448955
Zfp943	-1.59771	4.87129	4.11993	0.0423809	0.448955
Anapc5	1.1538	7.6708	4.10914	0.0426522	0.448955
Nfs1	1.41667	4.95376	4.11394	0.0425313	0.448955
Gpt2	-6.65972	1.73436	4.11186	0.0425834	0.448955
Galnt4	-2.31514	3.7295	4.11484	0.0425086	0.448955
Kctd10	1.10754	5.98891	4.10074	0.0428645	0.449057
Ttc30b	-4.01274	2.08176	4.10165	0.0428413	0.449057
Vdac2	1.3042	7.01479	4.10211	0.0428298	0.449057
Lrrk2	-1.46911	6.41104	4.10135	0.0428489	0.449057
Cd14	2.93894	5.01687	4.09336	0.043052	0.449602
Zfp280c	-2.49136	3.40206	4.09439	0.0430258	0.449602
Ptges2	2.36953	3.04588	4.094	0.0430356	0.449602
Dbnl	1.37241	5.67863	4.09049	0.0431251	0.449602
Cpped1	3.22815	2.85038	4.09117	0.0431078	0.449602
Entpd1	1.51856	6.05721	4.08844	0.0431774	0.449712
Tars2	1.52369	4.55378	4.07756	0.0434564	0.449981
Zfp763	-3.26479	2.36952	4.0846	0.0432756	0.449981
Prkd3	-1.21922	6.38668	4.08158	0.0433531	0.449981
0610009L18Rik	5.12756	1.23856	4.07442	0.0435371	0.449981
Cdc37	1.2965	5.81137	4.07484	0.0435263	0.449981
Polr1d	1.26022	6.17178	4.07607	0.0434948	0.449981
Art2a.ps	5.64322	0.367343	4.08127	0.043361	0.449981
Hnrnph1	-1.34545	6.33542	4.07515	0.0435184	0.449981
Susd1	-1.72817	5.06627	4.07136	0.0436162	0.450366
Gm14005	2.28402	3.47964	4.06966	0.0436601	0.450388
Fgl1	-8.79145	2.45243	4.06489	0.0437835	0.450715
Hps1	2.26736	3.92083	4.06335	0.0438234	0.450715
4632404H12Rik	-2.83454	2.07235	4.06088	0.0438876	0.450715
Senp6	-1.29833	6.2198	4.06037	0.0439009	0.450715
Ppp4r2	-1.41722	5.59545	4.06632	0.0437464	0.450715
Babam1	1.37756	4.53283	4.05872	0.0439437	0.450726
Gyg	1.35214	6.06991	4.05411	0.044064	0.451531
Ssr4	1.55635	6.49778	4.03907	0.0444582	0.452559
AW549877	-1.52868	5.30966	4.04047	0.0444214	0.452559
Chst11	3.51962	3.06333	4.04299	0.0443553	0.452559
Cdca3	2.14555	4.91397	4.04207	0.0443793	0.452559
Hibadh	-1.68218	5.82109	4.04603	0.0442755	0.452559
Ssh2	-1.25223	5.84594	4.04791	0.0442261	0.452559
Fpr2	1.8274	7.03394	4.03923	0.0444542	0.452559
Kctd12	-1.59888	5.7417	4.03552	0.0445519	0.453084
Ubox5	3.34661	1.95706	4.02937	0.0447146	0.453662
Kif24	4.98116	1.18299	4.0292	0.0447191	0.453662
Cyba	1.71996	7.83423	4.0286	0.0447349	0.453662
Slc4a8	3.75048	1.85284	4.01437	0.0451141	0.453666
Tada3	3.91626	2.08879	4.01945	0.0449784	0.453666
Mrpl10	1.22058	5.09762	4.01516	0.0450931	0.453666
Phf11c	1.81389	4.9825	4.01808	0.045015	0.453666
Snrpd1	1.4952	5.19628	4.02144	0.0449255	0.453666
Tmco4	1.90124	4.5064	4.02533	0.0448218	0.453666
Fam72a	5.22559	0.918414	4.01606	0.0450688	0.453666
Trim16	4.82046	1.89741	4.02408	0.0448552	0.453666
Pgrmc2	-1.85532	3.72868	4.02047	0.0449512	0.453666
Saysd1	3.59528	2.76663	4.01129	0.0451966	0.454072
Ctnnbl1	1.51539	5.13442	4.0058	0.0453439	0.455128
Ttc17	-1.38027	4.22391	4.00223	0.0454401	0.455245
Spin2c	5.37667	0.668465	4.00248	0.0454332	0.455245
Hdac4	1.93128	4.10471	3.99511	0.0456325	0.455865
Prokr1	-3.78906	3.47739	3.99369	0.0456711	0.455865
Mttp	-9.57713	1.41426	3.99587	0.0456119	0.455865
Ctu2	2.99324	2.81466	3.99518	0.0456306	0.455865
Tnfaip8l2	1.47127	6.24188	3.9905	0.0457574	0.456304
Thy1	1.79258	6.6864	3.98782	0.0458304	0.456609
Ahnak2	8.14208	1.69172	3.97991	0.0460459	0.458333
Ccser2	-1.43397	4.87881	3.97327	0.046228	0.459721
Frmd6	3.14684	2.45633	3.96855	0.0463576	0.459738
Creb1	-1.24379	6.06449	3.96872	0.046353	0.459738
G6pdx	1.16913	6.69172	3.9691	0.0463425	0.459738
Washc1	1.85034	3.81033	3.95959	0.0466049	0.461766
Ormdl1	-1.49225	4.63742	3.95774	0.0466562	0.461849
Ccdc186	-2.08852	3.98381	3.95432	0.0467512	0.461941
Spast	-1.17689	5.16242	3.95514	0.0467285	0.461941
Fgfbp3	-5.85557	1.62222	3.94162	0.0471055	0.465016
Mtrf1	3.63533	2.13932	3.93637	0.0472526	0.465873
Arid3a	1.44317	4.72811	3.93459	0.0473026	0.465873
Ankrd10	-1.25761	5.41008	3.9339	0.047322	0.465873
Gzmk	6.45311	5.55865	3.92666	0.0475261	0.466604
Frat1	-2.20223	3.14969	3.92829	0.0474802	0.466604
Aldh4a1	-3.25729	2.9951	3.92709	0.0475142	0.466604
Cyb561a3	-1.67912	4.5504	3.92476	0.0475801	0.466709
Kti12	2.63271	3.03538	3.91638	0.0478179	0.467765
Hexa	1.19392	7.27503	3.91778	0.0477778	0.467765
Stat1	1.41626	7.59001	3.9177	0.0477801	0.467765
Nampt	1.22296	7.00099	3.90905	0.0480268	0.469382
Cct2	1.13901	8.07151	3.90593	0.0481161	0.469829
Crebbp	-1.57459	4.55412	3.90085	0.0482616	0.470398
Ublcp1	-1.30053	6.1545	3.901	0.0482574	0.470398
Mapk8	-1.98409	3.89041	3.89068	0.0485547	0.4716
Mycbp2	-1.21087	6.05502	3.89496	0.0484313	0.4716
Pdlim2	2.26339	3.58378	3.88748	0.0486474	0.4716
Naa20	1.9615	5.02413	3.89221	0.0485105	0.4716
Rsbn1l	-1.8177	4.86636	3.88811	0.048629	0.4716
Usf1	1.35307	5.79255	3.88959	0.0485862	0.4716
1700097N02Rik	3.98596	1.88247	3.88036	0.0488541	0.472014
Egfr	-10.1809	1.84322	3.87847	0.0489091	0.472014
Ccdc93	-1.33262	4.74397	3.88396	0.0487495	0.472014
Rhbdd1	-1.92082	3.93558	3.87981	0.04887	0.472014
Fbxo18	1.40129	5.63366	3.88063	0.0488462	0.472014
Cactin	1.94757	3.74963	3.87381	0.0490451	0.472534
Gpld1	-7.7188	1.31756	3.86703	0.0492436	0.472534
Fnip1	-1.62249	4.69594	3.87315	0.0490643	0.472534
Tapbpl	1.50177	5.34969	3.8672	0.0492387	0.472534
Snx20	1.44757	5.51343	3.86832	0.0492058	0.472534
Tanc1	-2.49125	2.64456	3.87114	0.0491232	0.472534
Sf3b1	-1.18983	8.87457	3.86355	0.0493459	0.472534
Gsta4	-7.07298	1.86219	3.86316	0.0493574	0.472534
Eif2ak2	1.38979	5.68043	3.86347	0.0493482	0.472534
Vars	1.38133	5.54404	3.86097	0.0494219	0.472731
Trib1	3.74629	2.17797	3.85046	0.0497324	0.473908
Jdp2	3.73361	2.39873	3.84281	0.0499597	0.473908
Tuba1b	1.6415	7.60811	3.84829	0.0497967	0.473908
Baz2b	-1.39968	4.93473	3.8405	0.0500285	0.473908
Agap3	2.36124	3.21918	3.85184	0.0496914	0.473908
Tmem123	-1.29383	7.7753	3.84886	0.0497797	0.473908
Zfp958	-2.23604	3.73768	3.8526	0.0496689	0.473908
Ifi205	2.63777	5.6179	3.84478	0.049901	0.473908
Gm11346	-1.48804	5.26821	3.84275	0.0499616	0.473908
Nr2c2	-1.26456	5.74976	3.84424	0.0499172	0.473908
Tgfbi	1.59996	7.42692	3.84102	0.050013	0.473908
Bcat1	4.61183	0.444745	3.83678	0.0501398	0.474129
Cd200	-1.82959	3.62851	3.83738	0.0501218	0.474129
Cdc34	1.54921	5.63411	3.82587	0.0504672	0.475973
Gata3	4.26754	1.54447	3.82709	0.0504303	0.475973
Ndufs2	1.26839	6.86871	3.82851	0.0503876	0.475973
Nelfcd	1.58761	4.08546	3.82223	0.050577	0.476591
Aurkb	2.88091	3.6944	3.81879	0.0506808	0.476735
Ubr1	-1.72617	4.83104	3.8195	0.0506595	0.476735
Mef2c	-1.51621	6.36717	3.79568	0.0513849	0.480118
Ggt1	3.6234	3.33442	3.80333	0.0511506	0.480118
Cyp27a1	-2.37173	4.51584	3.79792	0.0513162	0.480118
mt.Co1	-2.35246	14.1113	3.79592	0.0513775	0.480118
Tbcb	1.79043	4.66174	3.7953	0.0513966	0.480118
Ftx	-2.45147	3.0412	3.79816	0.051309	0.480118
Jaml	1.45933	6.22936	3.79695	0.051346	0.480118
Rasa1	-1.35541	5.58216	3.80233	0.0511815	0.480118
Tmem108	-2.7148	2.66209	3.79371	0.0514455	0.480158
Ube2e1	-1.65514	4.47435	3.78808	0.0516187	0.480376
B3galt4	3.07821	2.4463	3.78716	0.0516471	0.480376
Cuedc2	1.96263	4.40927	3.78862	0.0516021	0.480376
Ppp4r3a	-1.19661	6.04533	3.79097	0.0515298	0.480376
B430306N03Rik	1.59913	4.38747	3.77837	0.0519194	0.482492
Tmem57	-1.80451	3.80178	3.77576	0.0520002	0.482827
Stx18	1.48454	4.02826	3.76642	0.0522913	0.483949
Psmd14	1.24925	6.55218	3.76713	0.0522694	0.483949
Sft2d3	3.53753	2.19796	3.76613	0.0523006	0.483949
Fam53a	1.5363	4.24277	3.76897	0.0522117	0.483949
Ifng	3.95545	2.78974	3.75634	0.0526078	0.485957
Casp1	1.26775	6.86625	3.75714	0.0525825	0.485957
Rxrb	1.55442	4.73809	3.74232	0.0530506	0.486227
Cd2bp2	1.33594	5.94692	3.74876	0.0528466	0.486227
Adipoq	4.85003	1.14489	3.74692	0.0529048	0.486227
Clec4d	1.55212	7.41817	3.74494	0.0529677	0.486227
Sssca1	4.03113	1.29565	3.74319	0.053023	0.486227
Serpinb1a	-1.34772	6.72337	3.74108	0.0530902	0.486227
Pdlim7	2.52206	3.65711	3.73857	0.05317	0.486227
Psmb4	1.26538	7.5145	3.73702	0.0532192	0.486227
Eif3c	1.22663	7.88713	3.74441	0.0529843	0.486227
D930028M14Rik	4.82825	0.6426	3.73893	0.0531585	0.486227
Nln	1.57553	4.02123	3.73689	0.0532233	0.486227
Plekho2	2.12421	3.25763	3.74827	0.0528621	0.486227
Shoc2	-1.29244	5.16223	3.74227	0.0530522	0.486227
Ldha	1.4086	7.15195	3.72802	0.0535069	0.48625
Paxbp1	-1.49256	5.27691	3.72373	0.0536444	0.48625
Dmap1	1.78549	3.74269	3.72933	0.0534648	0.48625
Mcub	2.0031	4.49385	3.72131	0.0537221	0.48625
Kpna1	-1.66545	6.80288	3.73076	0.0534192	0.48625
Tm2d3	2.14642	3.56441	3.72485	0.0536083	0.48625
Mtr	-1.74495	4.7751	3.72697	0.0535405	0.48625
Anapc1	-1.42266	5.4557	3.72169	0.05371	0.48625
Grcc10	-3.31969	1.67706	3.73091	0.0534144	0.48625
Dusp2	1.66406	5.36826	3.72235	0.0536887	0.48625
Car6	6.20506	2.10028	3.72204	0.0536988	0.48625
Lrrc8b	-1.751	4.14382	3.71785	0.0538335	0.486799
Stat2	1.55154	6.08006	3.71663	0.053873	0.486799
Lcor	-2.4988	3.98925	3.71407	0.0539557	0.487138
1700011B04Rik	5.15739	0.660193	3.70751	0.0541682	0.487471
Trpm2	1.87463	4.74185	3.71019	0.0540813	0.487471
Gbp4	1.50442	7.17934	3.70786	0.0541567	0.487471
Rad1	-1.81785	3.95322	3.70595	0.0542188	0.487471
Arl4d	2.44114	2.236	3.70647	0.054202	0.487471
Noc4l	2.97314	2.21325	3.70302	0.0543141	0.487922
Gclc	-1.60728	4.70641	3.69992	0.054415	0.488421
App	1.63171	6.40666	3.69514	0.0545713	0.489417
Amz1	-2.9061	2.66767	3.69338	0.0546289	0.489526
Dynlt3	-1.63486	6.29146	3.69067	0.0547176	0.489914
Sdhb	1.15705	6.60706	3.68919	0.0547663	0.489943
Dedd	2.75238	2.34867	3.68243	0.0549886	0.491307
Ska1	2.58498	2.46367	3.6799	0.0550721	0.491307
Tmed8	-1.36647	5.23759	3.67902	0.0551011	0.491307
Clec2d	-1.5751	7.31221	3.67995	0.0550706	0.491307
Tmem245	-1.67679	4.39512	3.67392	0.0552701	0.491582
Cebpb	2.06372	2.95806	3.67351	0.0552836	0.491582
Pde3b	-1.08603	5.48145	3.67141	0.0553535	0.491582
Zcchc11	-1.35183	5.2741	3.66984	0.0554056	0.491582
Cep85l	-3.14822	2.48599	3.67185	0.0553388	0.491582
Zbtb37	-1.64699	4.29879	3.6701	0.0553967	0.491582
Rffl	-1.7245	4.22227	3.65788	0.0558046	0.49199
Ctdnep1	1.3993	4.29337	3.65887	0.0557714	0.49199
Rgs3	1.75439	4.51968	3.65943	0.0557528	0.49199
Galm	-2.92192	2.62661	3.65496	0.0559023	0.49199
Map3k19	-3.7318	2.28675	3.6623	0.0556569	0.49199
Bax	1.58186	4.49262	3.65683	0.0558399	0.49199
Zfp963	-5.04672	1.0947	3.66287	0.0556377	0.49199
Aldoa.1	1.42376	8.06901	3.65144	0.0560207	0.49199
Dusp1	2.88085	4.82218	3.65409	0.0559316	0.49199
Satb1	-1.81739	5.52957	3.65072	0.0560449	0.49199
Zfand5	-1.29825	6.69589	3.65201	0.0560016	0.49199
Fbxo8	-1.42818	4.71699	3.66458	0.0555806	0.49199
Msl3l2	4.17203	0.978803	3.66057	0.0557147	0.49199
Bckdhb	-3.37929	2.76096	3.64795	0.0561382	0.492409
Cdc42ep4	1.71735	4.27775	3.64328	0.0562961	0.493391
Med11	1.93524	4.11776	3.63342	0.0566302	0.495917
Miat	6.19769	2.45559	3.62946	0.0567652	0.496696
Clta	1.00283	7.21485	3.62617	0.0568774	0.497274
Naip1	8.65926	2.4652	3.6228	0.0569928	0.497879
Oas3	1.98941	7.12369	3.61665	0.0572041	0.49932
Cfl1	1.19425	8.57581	3.61285	0.0573347	0.500055
Amotl2	4.31723	1.23279	3.60944	0.0574524	0.500677
Rfc5	2.11527	4.63211	3.60601	0.0575711	0.501306
Vps13b	-1.27167	5.34876	3.60091	0.057748	0.501631
Scn1b	5.11964	1.93239	3.60315	0.0576702	0.501631
Glce	-2.3065	3.25532	3.60091	0.0577479	0.501631
Ipo5	1.32849	5.84114	3.59377	0.0579965	0.502252
C1qc	4.28575	6.28204	3.5935	0.0580059	0.502252
Adal	-1.81755	3.67882	3.59668	0.057895	0.502252
Far1	-1.2312	6.62892	3.59376	0.0579968	0.502252
Eno1	1.36166	7.51876	3.59028	0.0581185	0.502823
Tspo	1.80348	7.57839	3.58508	0.0583006	0.503994
Rbmx	-1.8121	4.83048	3.58194	0.0584108	0.504294
Fam76b	-1.43804	5.1836	3.58143	0.0584289	0.504294
Cbx7	-1.73	3.57529	3.57743	0.0585697	0.505033
Rpl18	1.40179	9.18954	3.57634	0.0586082	0.505033
Csrp2	-3.45971	3.15411	3.57246	0.0587454	0.505407
Nsd2	1.75453	4.95154	3.57318	0.0587197	0.505407
H2.K1	1.53575	11.2775	3.56752	0.0589203	0.50592
Ppp1r8	1.21358	5.14441	3.56853	0.0588844	0.50592
Mfsd14b	-1.2459	5.89437	3.56591	0.0589775	0.50592
Vmn2r26	6.87978	2.13183	3.56548	0.0589927	0.50592
Zfp451	-1.49959	4.42637	3.56268	0.0590922	0.505968
Akap8	-1.08356	6.52817	3.56294	0.059083	0.505968
Dusp14	3.98578	2.25351	3.55232	0.0594621	0.506931
Bcas2	-1.57912	6.08507	3.55299	0.0594384	0.506931
Glipr2	1.6061	7.4966	3.55164	0.0594868	0.506931
Hrh2	2.16311	3.46028	3.55694	0.0592971	0.506931
Zfp839	-3.46457	2.21521	3.55267	0.0594497	0.506931
Slc39a8	4.28527	1.73189	3.55427	0.0593923	0.506931
Psmc5	1.37829	6.01795	3.54823	0.0596091	0.507171
Egln3	4.30628	2.01899	3.54927	0.0595716	0.507171
Slc25a46	-1.34305	5.06597	3.54533	0.0597134	0.507658
Rab21	-1.31102	5.79094	3.54226	0.059824	0.508075
Daxx	1.9565	3.37747	3.54135	0.0598567	0.508075
Ercc6	-1.73854	3.86999	3.53021	0.0602601	0.509542
Ppp2r3d	4.15257	1.08504	3.53294	0.0601611	0.509542
Aoah	2.58879	3.74564	3.53005	0.0602659	0.509542
Ints6l	-1.50447	5.37487	3.5334	0.0601445	0.509542
Nfyb	-1.30658	4.98914	3.53131	0.06022	0.509542
Kdm6a	-1.28018	5.91648	3.52511	0.0604459	0.510663
Gm17259	-6.06424	2.00186	3.5218	0.0605665	0.511277
F730311O21Rik	-2.36644	2.53246	3.52052	0.0606134	0.511277
2500004C02Rik	-3.14386	2.65293	3.50827	0.0610633	0.511868
H2.T10	1.80886	5.14403	3.51338	0.0608751	0.511868
Ppib	1.22941	8.20515	3.51169	0.0609373	0.511868
Wdr83os	-2.00249	3.56607	3.5161	0.0607754	0.511868
Lrif1	-1.85018	4.56265	3.51245	0.0609092	0.511868
iap	-1.39887	6.20972	3.5099	0.061003	0.511868
Atl2	-1.83213	4.54444	3.51267	0.0609011	0.511868
1810034E14Rik	3.28673	1.81573	3.50899	0.0610367	0.511868
Hes6	-1.54832	4.29456	3.50589	0.0611509	0.512204
BC003331	-1.43846	4.76122	3.49428	0.0615813	0.51461
Snap23	-1.72654	7.86258	3.49511	0.0615503	0.51461
Myo1d	3.65761	2.8747	3.496	0.0615174	0.51461
Unc119b	1.73134	4.97631	3.49116	0.0616973	0.514813
Aldh1a2	6.6525	0.87161	3.49106	0.0617012	0.514813
Chd2	-1.26591	5.66054	3.48899	0.0617782	0.515057
Lig1	2.14943	3.88029	3.47776	0.0621988	0.515944
Eif4h	1.20358	7.37573	3.47955	0.0621316	0.515944
2610005L07Rik	-3.88202	1.59705	3.48298	0.0620031	0.515944
6330403K07Rik	4.8429	0.921163	3.47865	0.0621654	0.515944
Brwd3	-2.55865	3.24175	3.47651	0.062246	0.515944
Ppp1ca	1.25647	8.92841	3.47594	0.0622675	0.515944
Setd5	-1.18255	5.26722	3.47768	0.062202	0.515944
Cdc42ep2	2.11127	4.20813	3.47998	0.0621157	0.515944
Rora	-3.07786	2.58157	3.47383	0.0623467	0.516204
Ngp	4.67674	4.87423	3.47183	0.0624222	0.516237
4930453N24Rik	-1.07119	6.35355	3.47119	0.0624465	0.516237
Atr	-1.21258	5.0316	3.46804	0.0625656	0.516825
Thoc5	1.53703	4.56043	3.46349	0.0627379	0.517817
Bub1b	2.88142	4.4217	3.46107	0.0628297	0.517817
Serpinh1	7.60879	1.58409	3.46111	0.062828	0.517817
Vgll4	1.50163	3.79145	3.45817	0.0629399	0.517999
2310011J03Rik	1.53076	4.31399	3.45796	0.0629479	0.517999
Cdk2ap1	1.3681	4.21305	3.45203	0.0631742	0.519464
Tbc1d9b	2.14347	3.29342	3.44931	0.0632783	0.519668
Zfp213	2.07913	2.94538	3.4476	0.0633436	0.519668
Selenop	-1.75326	8.40528	3.4483	0.0633169	0.519668
Gnb2	1.59389	5.80512	3.44533	0.0634308	0.519988
Lgals9	1.3366	7.71878	3.443	0.0635204	0.520327
Med13	-1.51671	5.98643	3.4366	0.0637666	0.521947
Zfp638	-1.26463	6.23362	3.4329	0.0639098	0.522722
Pik3c2b	-3.17121	2.51208	3.42847	0.0640814	0.523332
Wsb1	-1.31078	5.8577	3.42879	0.0640691	0.523332
Mis18bp1	3.14689	2.80042	3.42688	0.064143	0.523438
Caml	-1.57394	4.08442	3.42437	0.0642407	0.523839
Ubtf	1.17155	6.29049	3.42289	0.0642984	0.523913
Tmprss13	4.54296	1.93188	3.41222	0.0647154	0.524536
Sdf4	1.09373	7.99743	3.41454	0.0646244	0.524536
Smim14	-1.39386	6.38944	3.41633	0.0645542	0.524536
Alkbh6	2.90895	2.09621	3.41543	0.0645895	0.524536
Ormdl2	1.50795	4.75492	3.41585	0.0645731	0.524536
Stat3	1.12682	5.90802	3.41239	0.0647086	0.524536
Tnfrsf1a	1.90647	3.76363	3.41352	0.0646645	0.524536
Tmem60	-1.75328	3.61149	3.41081	0.0647706	0.524588
Slc22a15	-2.86814	2.60878	3.40689	0.0649248	0.525048
Rtf2	1.09264	6.79133	3.40776	0.0648906	0.525048
Icos	1.85666	5.4722	3.40523	0.0649901	0.525182
F2	-15.2538	3.89813	3.40235	0.0651036	0.52555
Cdk19	-1.20108	5.76382	3.39914	0.0652306	0.52555
Riox1	1.73576	3.97249	3.40106	0.0651547	0.52555
Zfp800	-1.8949	4.23648	3.40013	0.0651914	0.52555
Limk1	2.54816	1.99486	3.39529	0.065383	0.526044
Fam60a	-2.43802	3.66917	3.39512	0.0653895	0.526044
Adgre1	2.21014	7.62768	3.38837	0.0656579	0.527692
Kyat3	-5.91645	2.55004	3.38751	0.0656923	0.527692
Lap3	1.91205	4.42038	3.38516	0.0657857	0.527863
Shkbp1	1.99623	3.18268	3.38452	0.0658115	0.527863
Epc2	-1.48243	4.97747	3.38228	0.0659008	0.527993
Fuca2	1.27484	5.38832	3.38166	0.0659257	0.527993
Asph	-2.20761	3.78889	3.37991	0.0659956	0.528161
Prim1	1.8486	4.37389	3.37754	0.0660906	0.528529
Sh3tc2	-5.13388	1.67338	3.37433	0.0662196	0.528776
Vbp1	-1.666	7.37618	3.37475	0.0662025	0.528776
Slc25a5	1.23336	8.22846	3.37145	0.0663353	0.528916
Epha2	6.42572	1.62292	3.37152	0.0663325	0.528916
Lypla2	1.64046	4.95548	3.35456	0.0670191	0.529096
Dock10	-1.12465	7.20062	3.35748	0.0669004	0.529096
Gcnt1	-1.56211	5.60805	3.35875	0.0668488	0.529096
Casp4	1.24009	6.36157	3.36091	0.0667613	0.529096
B9d2	2.50367	2.71518	3.36431	0.0666234	0.529096
Brms1	1.50894	4.42952	3.35273	0.0670937	0.529096
Srprb	1.48918	3.95488	3.36266	0.0666903	0.529096
Syngr2	1.43492	5.56704	3.34911	0.0672413	0.529096
Nfya	-2.49072	2.985	3.34938	0.0672303	0.529096
Rb1cc1	-1.27101	6.49337	3.36174	0.0667273	0.529096
Cc2d1b	1.70486	4.13217	3.35275	0.0670928	0.529096
Dhx33	-1.7443	3.46274	3.36581	0.0665629	0.529096
Hfe	-2.10464	5.49489	3.35069	0.0671769	0.529096
Dync2h1	-3.82081	1.88219	3.35993	0.066801	0.529096
Skil	-1.45448	5.05846	3.35185	0.0671296	0.529096
Ttc1	1.294	5.0318	3.35537	0.0669862	0.529096
Pomp	1.05494	6.90013	3.35283	0.0670894	0.529096
Pcsk7	1.71727	5.20826	3.36193	0.0667198	0.529096
Txn1	1.1443	7.46474	3.33887	0.0676612	0.52927
Cmklr1	3.43242	1.65851	3.34281	0.0674993	0.52927
Tmem221	3.94775	1.92788	3.34319	0.0674838	0.52927
Rps6ka1	1.2272	6.4073	3.33352	0.0678813	0.52927
Commd7	1.30917	5.05882	3.33793	0.0676997	0.52927
2001-03-01	-1.20538	6.48254	3.33397	0.0678628	0.52927
Fryl	-1.13739	6.0364	3.33918	0.0676483	0.52927
Ggt5	2.58626	3.68837	3.33816	0.0676903	0.52927
S100a6	1.89293	8.88882	3.33774	0.0677074	0.52927
Rala	-1.42274	5.04319	3.34167	0.067546	0.52927
Usp40	-1.81197	3.95666	3.3419	0.0675365	0.52927
Ndufs5	-1.70828	4.17891	3.33621	0.0677707	0.52927
5430437J10Rik	-4.41033	1.54153	3.33303	0.0679017	0.52927
Zfp420	-2.40467	2.87305	3.32814	0.068104	0.530463
Dennd1a	3.39352	1.57409	3.32555	0.0682112	0.530915
Cacna1s	3.32171	1.83944	3.32368	0.068289	0.531136
Pgd	1.06074	5.9625	3.32047	0.0684223	0.531418
Neil3	4.84366	2.54911	3.32043	0.0684237	0.531418
Klhl14	-4.41752	1.46327	3.31733	0.0685529	0.532038
Cops3	1.31949	5.62853	3.30124	0.0692276	0.532045
Adamts14	3.08147	3.35657	3.30718	0.0689779	0.532045
Mapkapk2	1.25542	7.63826	3.3018	0.069204	0.532045
Zcchc18	1.83713	3.44966	3.31021	0.0688509	0.532045
Arf5	2.53039	6.30551	3.30083	0.0692448	0.532045
Mrpl28	1.36865	4.24107	3.3147	0.068663	0.532045
Dgat2	-3.20997	3.29376	3.30664	0.0690005	0.532045
Ash1l	-1.55535	3.94243	3.30169	0.0692088	0.532045
Slc38a9	-1.34935	4.90454	3.30088	0.069243	0.532045
Sgsh	3.0159	2.51329	3.30193	0.0691985	0.532045
Ankib1	-1.0797	5.09726	3.30862	0.0689172	0.532045
Naaa	1.30926	6.10859	3.31144	0.0687992	0.532045
Eif4a1	1.24346	8.60284	3.3059	0.0690317	0.532045
Oxa1l	1.36898	5.15252	3.31555	0.0686276	0.532045
Trbv19	2.08758	3.6648	3.29636	0.0694335	0.532612
Zmym2	-1.17392	5.75472	3.29556	0.0694675	0.532612
Inmt	-10.8717	3.9694	3.2944	0.0695163	0.532612
Tmem68	-1.90196	4.26969	3.29725	0.0693958	0.532612
Acly	1.06521	7.34371	3.28884	0.0697523	0.533284
AI837181	1.54307	4.98047	3.28963	0.0697186	0.533284
Ppm1b	-1.65688	6.48651	3.2901	0.0696986	0.533284
Cenpn	4.05406	2.31918	3.28375	0.0699687	0.533893
Zmym5	-1.47183	5.51952	3.28076	0.0700965	0.533893
Lrrc29	3.08396	2.42392	3.28301	0.0700004	0.533893
Rab12	-2.27037	3.48227	3.28342	0.0699831	0.533893
Clec5a	1.67932	4.7571	3.27995	0.070131	0.533893
Rcn3	2.5453	2.38799	3.27884	0.0701787	0.533893
Gnpda2	-1.62288	4.33029	3.2793	0.0701587	0.533893
Maged1	-3.56996	1.77289	3.27375	0.0703966	0.535173
Kdm7a	-1.73354	7.32699	3.26785	0.07065	0.536721
Ric8b	-2.2614	3.74294	3.25407	0.0712464	0.537194
Mterf3	-1.73156	4.58583	3.2464	0.0715803	0.537194
Polr1a	1.58411	4.57548	3.25276	0.0713034	0.537194
Rad52	-1.98094	3.06234	3.25337	0.071277	0.537194
Cfp	2.41261	7.36109	3.24595	0.0716	0.537194
Pml	1.58763	5.33755	3.24699	0.0715549	0.537194
Zdhhc2	4.94525	2.01711	3.24915	0.0714604	0.537194
Ulbp1	-3.13178	2.75814	3.24981	0.0714317	0.537194
Tchp	2.4063	2.83876	3.26389	0.0708211	0.537194
Ywhag	1.10244	5.54577	3.25222	0.0713268	0.537194
Yipf6	-2.16588	3.94915	3.2446	0.071659	0.537194
Dlat	1.51262	4.18857	3.24736	0.0715385	0.537194
Ctsz	1.30887	6.77238	3.25159	0.0713541	0.537194
Nmb	3.86064	1.58434	3.24848	0.0714898	0.537194
Timp2	2.19543	5.10079	3.25747	0.0710987	0.537194
Kiz	-2.09161	3.94766	3.26227	0.0708911	0.537194
Batf	1.8602	4.64952	3.25157	0.0713551	0.537194
Zbtb20	-2.81091	2.87838	3.26183	0.0709099	0.537194
Ghr	-9.49201	1.99144	3.24515	0.0716352	0.537194
Wars2	-2.01223	3.36501	3.21035	0.073174	0.537707
Gem	2.13648	3.88489	3.21073	0.0731566	0.537707
Klc1	1.36066	5.08338	3.22926	0.0723336	0.537707
Ubr3	-1.52208	5.57733	3.21443	0.0729916	0.537707
Klhl36	3.36496	1.86968	3.23308	0.072165	0.537707
Itpr1	-1.15604	5.78274	3.22971	0.0723135	0.537707
Lrig2	-2.00639	3.88395	3.23189	0.0722174	0.537707
Hltf	-1.25341	5.71561	3.21593	0.0729249	0.537707
Lpcat1	-1.24654	4.84459	3.23423	0.072114	0.537707
Smim1	-3.39369	2.66007	3.21212	0.0730945	0.537707
Apc	-1.72356	4.32273	3.21765	0.0728482	0.537707
Nop53	1.14035	7.64693	3.22781	0.0723977	0.537707
Epb41l2	-1.04057	4.8273	3.23364	0.0721401	0.537707
Gm4951	4.35262	4.10337	3.22	0.0727438	0.537707
4930426D05Rik	-3.44694	2.14139	3.21963	0.0727599	0.537707
Galns	1.94063	3.36145	3.2172	0.0728683	0.537707
Zfp874b	-1.30403	5.28552	3.21296	0.073057	0.537707
Snapc1	-1.66524	3.63327	3.21134	0.0731295	0.537707
Tpst2	1.48427	5.17169	3.23939	0.0718876	0.537707
Mst1r	6.99415	1.12448	3.21714	0.072871	0.537707
Ska3	7.94301	1.06306	3.21936	0.0727722	0.537707
D3Ertd254e	-3.93926	1.64819	3.21128	0.0731323	0.537707
Trbv12.1	2.72467	2.77983	3.2181	0.0728279	0.537707
Smarcd2	1.15228	6.26605	3.23558	0.0720547	0.537707
Elp2	1.32929	5.2422	3.2129	0.0730599	0.537707
Scrg1	4.49697	2.46522	3.21432	0.0729967	0.537707
Klhl18	1.83651	3.07721	3.22409	0.0725623	0.537707
Rpl7l1	1.1337	6.02095	3.24081	0.071825	0.537707
Dpt	4.57937	1.75073	3.22389	0.0725708	0.537707
Tulp4	-2.07407	3.25223	3.20647	0.0733475	0.538324
Pola2	1.47781	4.50442	3.20624	0.0733579	0.538324
Zfp773	-2.03793	2.74764	3.19358	0.0739278	0.53863
Trmt6	1.71895	4.39619	3.18219	0.0744451	0.53863
Cct5	1.1422	8.21459	3.18371	0.0743757	0.53863
Atic	0.999395	5.69131	3.18935	0.0741194	0.53863
Gpr34	-2.6776	2.48751	3.18682	0.0742344	0.53863
Dexi	2.9742	1.66747	3.20235	0.0735324	0.53863
Tmem80	-1.56976	4.08104	3.1956	0.0738369	0.53863
Mnt	3.26205	1.58892	3.18673	0.0742384	0.53863
Rps6ka4	2.16754	3.74966	3.18812	0.0741753	0.53863
Ciapin1	1.67576	4.02647	3.1821	0.0744488	0.53863
Cyp4v3	-2.09805	3.93852	3.19028	0.0740775	0.53863
Golga1	-1.59871	4.21241	3.18475	0.0743285	0.53863
Telo2	2.72959	2.83198	3.1835	0.0743851	0.53863
Slx4ip	-2.08957	2.92634	3.19424	0.0738981	0.53863
Snx33	-2.72245	2.14289	3.19212	0.0739941	0.53863
mt.Rnr2	-2.76829	11.8806	3.19295	0.0739567	0.53863
Bin3	1.2876	6.03047	3.18728	0.0742132	0.53863
3110043O21Rik	-1.89992	3.35166	3.19066	0.0740599	0.53863
Smarcc2	-1.74562	3.18758	3.18865	0.0741514	0.53863
Exd2	-2.03507	3.77683	3.20039	0.0736209	0.53863
Tnfaip2	1.37119	7.02723	3.19599	0.0738192	0.53863
Vsir	1.33196	7.92215	3.17981	0.0745534	0.539025
Esco1	-1.29685	5.48928	3.16896	0.0750504	0.539139
Zfp410	1.83465	4.81539	3.17016	0.0749952	0.539139
Cdk17	-1.31546	5.45352	3.16863	0.0750655	0.539139
Sardh	-6.17974	3.42179	3.17424	0.0748081	0.539139
Ccdc51	2.26774	2.6928	3.16839	0.0750762	0.539139
F630028O10Rik	-1.90161	5.45941	3.16834	0.0750788	0.539139
Ect2	3.20042	2.47645	3.16637	0.0751693	0.539139
Trafd1	1.50789	7.40823	3.16713	0.0751345	0.539139
Sigirr	1.32932	4.55769	3.1764	0.074709	0.539139
Fam172a	-1.21083	4.83775	3.17602	0.0747268	0.539139
Eif4ebp2	1.41761	3.98946	3.17271	0.0748779	0.539139
Ocrl	-3.37643	2.22839	3.16797	0.0750958	0.539139
Gm26917	3.7744	1.5742	3.1636	0.0752971	0.539338
Gas8	4.66423	1.53237	3.16387	0.0752845	0.539338
Ttf2	3.18054	3.14107	3.16129	0.0754038	0.539743
Hist2h2be	-2.82757	2.78071	3.15927	0.0754969	0.540051
D430019H16Rik	5.56084	0.574004	3.15452	0.075717	0.540908
Ap1ar	-1.3031	4.47538	3.15499	0.0756952	0.540908
Il1rn	1.71967	5.46631	3.15341	0.0757686	0.540918
Gm16124	-2.34012	2.66634	3.152	0.0758342	0.541028
Ranbp2	-1.21658	6.93206	3.15085	0.0758873	0.541049
Ifit2	1.56435	7.23719	3.14819	0.0760112	0.541574
Mterf2	-2.44357	2.95162	3.1464	0.0760947	0.54181
0610030E20Rik	-1.76237	3.93301	3.14223	0.0762895	0.542481
Poc5	-1.84903	3.77725	3.14247	0.0762781	0.542481
Hsp90aa1	1.31476	8.64495	3.14074	0.0763591	0.542618
4932438A13Rik	-1.80637	4.63183	3.12778	0.0769683	0.54407
Gpatch4	2.53685	2.8014	3.12976	0.076875	0.54407
Ssx2ip	-1.98481	3.97095	3.12854	0.0769324	0.54407
Ints11	1.62113	5.18156	3.12734	0.0769894	0.54407
Iglc2	-1.30734	6.89217	3.13036	0.0768468	0.54407
Ccr5	1.89252	4.69662	3.12674	0.0770176	0.54407
Icam2	1.78008	6.30213	3.13304	0.0767205	0.54407
Etv5	-3.90258	1.77848	3.13062	0.0768343	0.54407
Mtss1	-1.45233	5.01753	3.12747	0.076983	0.54407
Bmp2k	-1.41611	5.63656	3.12564	0.0770698	0.544081
Prkcq	1.17031	7.50432	3.1234	0.0771755	0.544383
Ube2g2	1.48192	4.88763	3.12153	0.0772641	0.544383
Nhlrc3	-1.60988	4.05549	3.12162	0.0772601	0.544383
Prkcsh	1.45568	4.61073	3.11884	0.0773917	0.544904
Scn4a	-3.96833	1.54378	3.11785	0.0774391	0.544904
Phb	1.04735	5.62553	3.11623	0.077516	0.545019
Gm4285	-4.09632	1.88407	3.11538	0.0775565	0.545019
H2.Q4	1.14122	7.85085	3.09192	0.0786817	0.545208
Banf1	1.5333	4.5019	3.09733	0.0784207	0.545208
Mtch2	1.08632	6.18923	3.11012	0.0778071	0.545208
Prpf38a	1.46503	5.27602	3.10411	0.0780948	0.545208
Tcta	-1.6104	4.82346	3.104	0.0781003	0.545208
Larp1	1.43753	4.90601	3.09446	0.0785594	0.545208
Plekhb2	1.51359	5.1455	3.10095	0.0782466	0.545208
Zbtb10	-3.64044	2.41258	3.09058	0.0787467	0.545208
Lppos	3.3227	1.25211	3.11003	0.0778115	0.545208
Birc5	2.71494	4.29902	3.0978	0.0783981	0.545208
Gm43698	-3.61877	1.78849	3.09369	0.0785965	0.545208
Rufy2	-1.81265	3.66704	3.09612	0.0784793	0.545208
Ptprv	3.65463	1.13179	3.09762	0.078407	0.545208
Fcrl1	-1.13504	6.27195	3.09619	0.0784758	0.545208
Gripap1	1.30979	5.1481	3.09943	0.0783199	0.545208
Ctso	-1.20909	5.92459	3.09393	0.0785848	0.545208
Tgm2	1.73011	6.1053	3.11177	0.0777286	0.545208
Prpf38b	-1.45203	5.36028	3.09063	0.0787441	0.545208
Mrpl4	1.75885	3.93268	3.09626	0.0784723	0.545208
Gm36981	5.43459	0.976483	3.10766	0.0779249	0.545208
Slc35f2	3.35469	1.61902	3.10688	0.0779624	0.545208
Rev1	-1.78279	3.66923	3.1108	0.0777746	0.545208
Zfp664	-1.38044	4.96281	3.09724	0.0784253	0.545208
Cxcr3	3.02873	4.74167	3.0887	0.0788376	0.545488
Sdcbp2	3.37357	3.82872	3.08673	0.0789333	0.545799
Rabgap1l	-1.15398	7.15238	3.08445	0.0790439	0.546214
Adgrg5	2.92996	2.81625	3.08323	0.0791032	0.546273
Hsh2d	1.43821	4.99425	3.0789	0.079314	0.547028
Garnl3	6.22062	2.974	3.07952	0.079284	0.547028
Ncaph2	1.18452	6.41757	3.07388	0.0795595	0.54767
Aldh3b1	1.45132	5.08786	3.07573	0.0794688	0.54767
Arhgap19	2.96908	2.96494	3.07488	0.0795104	0.54767
Syne1	-1.63509	4.31808	3.06044	0.0802199	0.551689
Gm5970	4.6075	0.552571	3.05944	0.0802693	0.551689
Kif22	2.86022	4.03717	3.05888	0.0802968	0.551689
Slfn4	1.77164	8.98638	3.05673	0.0804035	0.55207
Uhrf1bp1l	-1.26664	5.33417	3.05314	0.0805811	0.552614
Ppm1m	1.56493	5.12929	3.05203	0.0806365	0.552614
Clip1	-1.07001	5.67189	3.05295	0.0805906	0.552614
Ccnb2	1.77525	5.9966	3.04802	0.0808359	0.553277
Pym1	1.51467	4.96965	3.04838	0.0808175	0.553277
Ddx5	-1.15492	9.77791	3.04509	0.0809818	0.553923
Tmem208	1.53161	4.56778	3.04192	0.0811397	0.554301
Mat2b	-1.63157	7.90258	3.04196	0.081138	0.554301
Zfp644	-1.62895	4.46254	3.0404	0.0812161	0.554471
Plscr1	1.73969	4.52298	3.03701	0.0813857	0.555277
Slpi	1.95473	7.01403	3.03595	0.081439	0.555289
Hspa8	1.3208	10.0808	3.0334	0.0815671	0.555811
Ovgp1	-3.32131	2.2589	3.0303	0.0817228	0.556137
Mcm10	3.4235	2.90756	3.03057	0.0817092	0.556137
Capn2	1.26031	7.11096	3.02937	0.0817696	0.556137
BC004004	1.01941	6.14568	3.0281	0.0818337	0.556222
Treml4	-1.95354	5.59945	3.02702	0.0818885	0.556243
Spa17	-2.98666	2.38173	3.02083	0.0822015	0.556912
Plekhj1	1.63312	3.51757	3.01996	0.0822453	0.556912
Slfn2	1.23472	9.36441	3.02043	0.0822216	0.556912
Csrnp1	2.06197	3.57476	3.02319	0.0820819	0.556912
Cep68	-1.67477	3.88395	3.02172	0.0821564	0.556912
Isg15	2.85536	10.7965	3.01635	0.0824288	0.557573
Amer1	-3.01637	2.17277	3.01601	0.0824463	0.557573
Zfp101	-1.62949	4.09061	2.99964	0.0832829	0.558387
Alox5	1.34499	5.07342	3.00504	0.083006	0.558387
Llgl1	1.98289	3.41073	2.99993	0.083268	0.558387
Ly6g	2.37806	4.90873	3.0038	0.0830692	0.558387
Ten1	2.09755	3.9482	3.0026	0.0831309	0.558387
Ankra2	-1.61472	4.08111	3.00638	0.0829376	0.558387
Foxd2os	3.60644	1.41397	3.01025	0.0827395	0.558387
Tars	0.946418	5.48923	3.00797	0.0828562	0.558387
Kidins220	-1.02303	5.85532	3.00468	0.0830246	0.558387
Ccdc66	-1.76338	3.6278	3.00351	0.0830843	0.558387
Pld4	1.12167	7.1635	3.00993	0.0827557	0.558387
Fabp1	-15.9153	6.28158	2.99966	0.0832818	0.558387
Rps6kc1	1.82429	3.31275	3.00758	0.0828757	0.558387
Fxyd5	1.13266	7.77131	2.99947	0.0832919	0.558387
Zfp850	-2.60611	3.07371	2.99814	0.08336	0.558496
Cxcl2	5.20925	0.477313	2.99458	0.0835438	0.558686
Fuca1	1.06475	6.26525	2.99527	0.0835082	0.558686
Cdc6	2.73681	3.25506	2.99575	0.0834831	0.558686
Pex11a	7.04404	0.873466	2.99009	0.0837756	0.558746
Ccar1	-1.04972	5.72278	2.99056	0.0837511	0.558746
Gpx3	4.25063	2.44154	2.99223	0.0836647	0.558746
Scarf1	3.06989	2.54018	2.99284	0.0836334	0.558746
Strbp	-1.47242	5.36872	2.98939	0.0838119	0.558746
2510039O18Rik	1.44133	4.88429	2.98707	0.0839321	0.558982
Slc46a3	-1.70896	3.85676	2.98633	0.0839705	0.558982
Use1	1.11198	6.59764	2.9857	0.0840028	0.558982
Gm4129	-4.34145	2.80741	2.98408	0.084087	0.559196
Fam102b	-1.79312	4.53554	2.97877	0.0843634	0.559283
Tomm34	1.13119	4.94922	2.97841	0.084382	0.559283
Dnajc19	-1.49111	4.36128	2.97879	0.0843623	0.559283
Arhgef11	-3.19204	1.78429	2.97886	0.0843589	0.559283
Zfp60	-2.60224	3.70388	2.97785	0.0844112	0.559283
Zfp36	-1.72805	4.16377	2.97796	0.0844057	0.559283
Tspan3	2.2464	4.34679	2.9763	0.0844922	0.559476
Ranbp1	1.28626	5.567	2.97421	0.0846016	0.559512
AI987944	-1.90735	3.83151	2.97457	0.0845829	0.559512
1700025G04Rik	1.74435	4.25916	2.9732	0.0846545	0.559519
Cers6	1.03859	6.13782	2.97019	0.0848118	0.560055
Fah	-4.48665	3.60496	2.96966	0.0848395	0.560055
Fcgr3	1.23378	8.08658	2.96856	0.0848973	0.560093
Prcc	2.32204	2.5094	2.96604	0.0850298	0.560625
Srpk2	-1.05449	5.06784	2.96391	0.085142	0.561021
Zfp524	3.52338	1.24345	2.95943	0.0853782	0.562234
Nup62	1.94241	3.83963	2.95548	0.0855867	0.562675
Mrgprb1	8.36216	0.564721	2.9552	0.0856018	0.562675
Ube3a	-1.46152	5.62058	2.95566	0.0855772	0.562675
Plaur	1.72406	4.19663	2.95124	0.0858116	0.562682
Rfxap	2.16429	3.23471	2.95206	0.0857681	0.562682
Hmbox1	-3.76944	2.10799	2.95293	0.085722	0.562682
Tmem39b	3.2015	1.18701	2.95182	0.0857808	0.562682
Armcx1	3.6125	1.64815	2.94822	0.0859722	0.562937
Gm38414	-5.14121	1.4587	2.94869	0.085947	0.562937
Ltv1	-1.3881	4.43954	2.94588	0.0860969	0.562937
Malat1	-1.33388	6.27138	2.9456	0.0861117	0.562937
Usp53	-2.37952	2.8349	2.94695	0.0860399	0.562937
Agpat4	1.25269	4.14442	2.94264	0.0862695	0.562945
Zfp729a	-1.54378	4.29158	2.94314	0.0862427	0.562945
Akr1a1	1.10336	7.83185	2.94273	0.0862647	0.562945
Mpv17l2	2.97839	1.55621	2.93778	0.0865297	0.562986
Smg5	1.0904	5.20711	2.93667	0.0865891	0.562986
Srsf11	-1.03154	6.65513	2.93813	0.086511	0.562986
Gm37716	3.92075	1.47555	2.93751	0.0865442	0.562986
Fermt3	1.58169	7.45639	2.93687	0.0865786	0.562986
Ndufc1	-1.68388	4.4106	2.93725	0.0865579	0.562986
2410089E03Rik	-3.10864	1.41136	2.93065	0.0869123	0.564746
Ptgfrn	-3.35263	1.92622	2.92921	0.0869901	0.564909
Redrum	-3.27853	4.74543	2.92727	0.0870946	0.564909
Cnot7	-1.41187	5.34811	2.92755	0.0870793	0.564909
Fcrla	-1.33852	6.42335	2.92488	0.0872237	0.565067
Gatsl3	4.027	1.6837	2.92512	0.0872107	0.565067
Cxcl10	3.25415	4.79046	2.92313	0.0873181	0.565203
Ubr2	-1.21551	4.65934	2.92255	0.0873495	0.565203
Swt1	-1.8396	6.45931	2.9213	0.0874173	0.565302
Etv6	1.19801	4.70982	2.91797	0.0875981	0.565497
Mon2	-1.05397	4.7096	2.91791	0.0876013	0.565497
Arpc4	1.21557	6.30508	2.91785	0.0876048	0.565497
Zbtb32	3.08336	3.24163	2.90999	0.0880326	0.566039
Bcat2	1.86386	3.80313	2.90622	0.0882386	0.566039
Pde1b	2.17263	3.37109	2.90588	0.0882572	0.566039
Tnrc6b	-1.47304	5.48267	2.91422	0.0878018	0.566039
Mgat1	1.12804	4.98132	2.90631	0.0882338	0.566039
Hyls1	-1.54226	3.61757	2.91097	0.0879792	0.566039
Sp3	-1.25442	6.33677	2.91039	0.0880105	0.566039
Kynu	-1.70021	3.90449	2.90379	0.0883713	0.566039
Cul9	3.61212	1.54542	2.90396	0.088362	0.566039
Sh3bp2	1.26109	4.87405	2.90548	0.0882791	0.566039
Tsc22d3	1.2405	8.30332	2.90515	0.0882969	0.566039
Ostc	1.06812	6.23285	2.91104	0.0879749	0.566039
Vps18	2.69556	2.5565	2.90572	0.088266	0.566039
Micu2	0.976885	6.50888	2.89677	0.0887573	0.566156
Cnpy4	1.85223	3.77075	2.90163	0.0884901	0.566156
Ralb	1.53033	4.81136	2.89864	0.0886541	0.566156
Hmgb1.ps8	-3.9845	1.43042	2.90119	0.0885143	0.566156
Tle3	1.13594	4.80667	2.8973	0.0887279	0.566156
Lrpap1	1.17256	5.36739	2.89818	0.0886799	0.566156
Zc3h13	-1.38296	4.1823	2.90018	0.0885699	0.566156
Lat	1.55932	6.3931	2.89334	0.0889462	0.566407
Zfp12	-1.51689	4.05872	2.88984	0.0891396	0.566407
Mars2	-2.91361	3.58159	2.88861	0.089208	0.566407
Ptbp1	1.1118	6.60523	2.88845	0.089217	0.566407
Me1	-6.12609	1.38266	2.89102	0.0890745	0.566407
Sgo2a	4.12407	2.49523	2.8891	0.0891807	0.566407
Mrpl39	1.57079	4.469	2.89348	0.0889385	0.566407
Calr	1.21485	6.94886	2.89016	0.089122	0.566407
Bbs7	-3.8441	1.75052	2.88294	0.0895227	0.56649
Ddx10	2.05916	4.06847	2.87978	0.089698	0.56649
Mob1b	-1.75806	4.44488	2.88036	0.0896662	0.56649
Atp6v1a	0.951536	6.13234	2.88261	0.0895405	0.56649
Rmi1	-1.68773	3.96459	2.8797	0.0897029	0.56649
Hmgn3	2.55197	2.99045	2.88594	0.0893557	0.56649
Gm19684	3.9356	1.57336	2.88132	0.0896124	0.56649
Taf4b	-1.89324	3.26433	2.88457	0.0894321	0.56649
Cep41	-3.00407	1.76057	2.88704	0.0892947	0.56649
Tctn3	3.16888	1.72768	2.87716	0.0898445	0.567052
Asb13	-1.28863	4.77046	2.87613	0.0899016	0.567059
Gm26532	2.37778	3.37385	2.87525	0.0899509	0.567059
Sh3d19	-2.9487	3.94119	2.87358	0.0900444	0.567245
Zc3hc1	1.36754	4.36238	2.87284	0.0900857	0.567245
Ebf1	-1.64194	3.99088	2.86733	0.0903947	0.567864
Itih4	-10.3623	4.27543	2.86925	0.0902869	0.567864
1700047M11Rik	6.10863	1.72243	2.86811	0.0903508	0.567864
Trpm4	3.11686	1.79722	2.86825	0.0903431	0.567864
Rab7b	2.68304	3.44828	2.85944	0.0908389	0.568148
Afmid	3.59097	1.46946	2.86142	0.0907272	0.568148
Myo1e	-1.40711	4.08795	2.8543	0.0911299	0.568148
Ppic	-2.97564	2.36907	2.85468	0.0911084	0.568148
Rsph10b	-3.89137	2.75258	2.86224	0.0906814	0.568148
Nacc2	1.88971	3.90549	2.85425	0.0911329	0.568148
Zranb3	2.83293	3.66531	2.85649	0.0910056	0.568148
Arid1a	-1.50844	3.90879	2.85927	0.090849	0.568148
Setx	-0.983756	6.16426	2.85461	0.0911123	0.568148
Kri1	1.18342	5.17839	2.85498	0.0910914	0.568148
A430033K04Rik	5.07161	1.12758	2.86319	0.0906275	0.568148
Coq9	-1.58994	4.09952	2.85346	0.0911777	0.568148
Nsa2	0.977413	7.13916	2.85702	0.090976	0.568148
Pfn1	1.12113	8.22074	2.85371	0.0911632	0.568148
Nedd4	-1.40375	5.41504	2.84715	0.0915359	0.569064
Chmp6	2.13242	4.44179	2.84778	0.0915001	0.569064
Arih1	-1.09948	6.83465	2.84857	0.0914555	0.569064
Tigd2	-1.37832	4.56738	2.84881	0.0914414	0.569064
Gemin8	5.87675	1.10481	2.84488	0.0916653	0.569212
F830016B08Rik	4.32095	1.97771	2.84533	0.0916399	0.569212
Dlgap4	1.65793	4.07135	2.84226	0.091815	0.56929
Nucb2	1.61537	4.65313	2.84281	0.0917835	0.56929
Zfp691	2.4967	1.89363	2.84116	0.0918779	0.56929
Apbb1	3.45468	1.33589	2.84022	0.0919317	0.56929
Rbm5	-0.996505	7.13214	2.84004	0.091942	0.56929
A630072M18Rik	-1.9113	2.72904	2.8368	0.0921274	0.570111
Tkt	1.24544	7.48771	2.83219	0.0923921	0.571421
Strn	-1.28178	4.72415	2.82883	0.0925856	0.571716
1700023H06Rik	-4.08313	3.44679	2.82884	0.0925853	0.571716
Gpr160	3.31812	2.5075	2.8286	0.0925989	0.571716
Dcun1d2	-1.41373	4.02664	2.82749	0.0926631	0.571785
AI504432	-1.4716	5.35591	2.82563	0.0927705	0.571793
Ube2n	-1.13394	5.35505	2.82619	0.092738	0.571793
rcc4	-1.78426	3.48055	2.82339	0.0929002	0.572265
Ccdc82	-1.17539	5.36001	2.82095	0.0930414	0.572763
Nek7	-1.33921	7.08014	2.82016	0.0930873	0.572763
Rock2	-1.36418	5.4032	2.80497	0.0939725	0.572885
Hck	1.1381	8.19021	2.81047	0.0936508	0.572885
2700081O15Rik	4.33524	1.84919	2.808	0.0937954	0.572885
Map4k3	-2.11073	3.1646	2.80929	0.09372	0.572885
Gstk1	-3.13684	2.83746	2.80393	0.0940339	0.572885
Srr	-2.20098	2.86369	2.80825	0.0937804	0.572885
Dda1	1.68958	3.75982	2.80901	0.0937363	0.572885
Terf2ip	1.36791	4.5417	2.8147	0.0934045	0.572885
Slc17a5	-1.9934	2.9483	2.81645	0.0933028	0.572885
Mtg1	2.89909	2.7791	2.8062	0.0939004	0.572885
Maf	2.21617	3.67426	2.80342	0.0940637	0.572885
Prpf6	0.918841	5.72447	2.81224	0.0935477	0.572885
Ngdn	1.06894	5.63786	2.81881	0.0931657	0.572885
Hsdl1	1.14796	5.2453	2.80644	0.0938864	0.572885
Usp35	-5.0723	1.46934	2.81601	0.0933281	0.572885
Cd5l	4.60576	7.42136	2.80557	0.0939375	0.572885
Pnpla8	-1.6396	7.08719	2.81341	0.0934796	0.572885
Gtf3c2	-1.66844	4.02149	2.80832	0.0937767	0.572885
Zcchc4	-1.46312	3.62155	2.8008	0.0942175	0.573498
Tlr3	3.3704	1.66911	2.79881	0.0943341	0.573855
Ccar2	1.78744	4.27881	2.79799	0.0943827	0.573855
Kmt2a	-1.6105	4.88321	2.79543	0.0945333	0.574447
Gm28935	4.11624	1.53322	2.79191	0.0947411	0.575385
Ptgr1	2.23275	3.21976	2.79098	0.094796	0.575395
Fignl1	2.11714	3.65523	2.78842	0.0949481	0.575684
Polr1c	1.25599	5.13053	2.78837	0.0949505	0.575684
Imp4	1.0741	5.25988	2.75905	0.0967056	0.57596
Arfgef1	-0.950938	6.29155	2.75948	0.0966794	0.57596
Wac	-1.04066	5.88283	2.7638	0.0964192	0.57596
Haus7	2.3239	2.79558	2.76162	0.0965504	0.57596
Pgls	1.49868	4.80808	2.78053	0.0954163	0.57596
Ninj1	1.5199	5.18496	2.76643	0.0962607	0.57596
Tnpo1	-1.08774	6.79601	2.76221	0.0965147	0.57596
Spata24	2.88853	1.64865	2.75907	0.0967047	0.57596
Celsr1	3.63612	0.916933	2.7619	0.0965336	0.57596
Cdh17	3.44034	2.43228	2.78387	0.0952178	0.57596
Mvb12a	1.61751	4.05652	2.76221	0.0965147	0.57596
Raly	1.52093	8.60471	2.78134	0.0953684	0.57596
Ccdc28b	1.51195	3.72049	2.77017	0.096036	0.57596
Tradd	1.88628	3.78938	2.77371	0.0958237	0.57596
Sh2d2a	2.03428	4.15264	2.78605	0.0950882	0.57596
Phf2	3.84015	1.47791	2.76782	0.0961771	0.57596
Foxj2	1.67387	3.54679	2.77918	0.0954973	0.57596
Faap20	1.23528	4.25579	2.77598	0.0956881	0.57596
Rpusd1	4.83609	0.864119	2.77666	0.0956477	0.57596
Zfp930	-1.70736	3.8159	2.76053	0.0966162	0.57596
Atg10	3.34841	2.50911	2.7819	0.0953349	0.57596
Dnajb1	1.06234	5.97819	2.76779	0.0961786	0.57596
Gm38832	6.05592	1.74019	2.77515	0.095738	0.57596
Psmc2	1.1017	6.13346	2.76691	0.0962321	0.57596
Nipsnap1	-1.83454	4.00795	2.76732	0.0962071	0.57596
Asb6	2.52282	2.79281	2.76575	0.0963015	0.57596
St6galnac6	2.40701	2.76998	2.75926	0.096693	0.57596
Zer1	1.9698	3.09002	2.77839	0.0955442	0.57596
Ufsp2	1.27669	5.01159	2.76546	0.0963192	0.57596
Slc6a19	-3.32846	2.42177	2.77078	0.0959996	0.57596
Nkg7	2.18839	6.39067	2.77481	0.095758	0.57596
Alg13	3.56406	2.09121	2.78133	0.0953687	0.57596
Trim30a	1.13614	8.19176	2.75698	0.0968307	0.576386
Ddx58	1.12721	7.04025	2.75604	0.096888	0.576409
Fam69a	-1.19897	5.2869	2.74574	0.0975142	0.577228
Asprv1	2.01019	5.8234	2.74335	0.0976595	0.577228
Mical1	1.25376	5.73108	2.74563	0.0975206	0.577228
Cd4	1.60135	5.57397	2.74511	0.0975524	0.577228
Osbp	-0.943256	5.08811	2.74073	0.09782	0.577228
Cd68	1.31115	5.24851	2.75276	0.0970867	0.577228
Sec23b	0.95174	5.47429	2.74944	0.0972887	0.577228
Oas1c	1.26178	4.54256	2.75133	0.0971736	0.577228
Pot1b	-1.31414	4.73319	2.74059	0.0978289	0.577228
Apoa1	-8.53442	5.37136	2.74094	0.0978075	0.577228
Prkaca	-2.72484	2.29218	2.75105	0.0971904	0.577228
Baiap3	2.33063	4.39082	2.74228	0.0977251	0.577228
kr6	-3.1025	2.12941	2.74231	0.0977235	0.577228
Herc4	-1.10922	6.91506	2.74533	0.0975389	0.577228
Pdk3	1.25646	5.9003	2.74899	0.0973157	0.577228
Prrc2a	1.83887	2.8728	2.73922	0.0979128	0.577407
Dapl1	-1.78734	3.64346	2.73695	0.098052	0.577596
A330040F15Rik	4.25703	2.49644	2.73775	0.0980027	0.577596
Dicer1	-0.970188	5.36687	2.73296	0.098297	0.578723
Hpd	-9.19998	4.90716	2.72915	0.0985319	0.578841
Zfp777	2.04652	2.93921	2.73137	0.0983949	0.578841
Gm15427	1.64823	3.24329	2.72959	0.0985047	0.578841
Psd3	-3.46537	2.26195	2.72925	0.0985253	0.578841
Ccng2	-1.11392	6.06461	2.72696	0.0986672	0.579138
Elf1	-0.952317	6.59991	2.72659	0.0986898	0.579138
Yap1	-2.43541	3.80016	2.725	0.0987883	0.5794
Ap4e1	-2.11982	2.98733	2.72397	0.0988518	0.579457
Cib3	-3.49845	2.62771	2.71909	0.0991543	0.580741
Atf7	-2.30175	2.34298	2.71871	0.0991784	0.580741
Spic	-2.23481	3.66873	2.71736	0.0992619	0.580914
Maz	1.29178	4.95575	2.71586	0.0993554	0.581145
Cox14	1.60114	4.31331	2.71497	0.0994109	0.581155
Snx17	1.14876	5.80123	2.71216	0.0995863	0.581865
S100pbp	-1.68377	3.39081	2.70764	0.0998687	0.58198
Ubap2l	-1.80875	3.40086	2.70084	0.100295	0.58198
Nxn	2.09181	3.37853	2.70623	0.0999571	0.58198
C030034I22Rik	-3.21557	2.01237	2.70781	0.099858	0.58198
Ttpa	-13.7529	2.97723	2.70592	0.0999761	0.58198
Lrrc56	5.17669	0.920718	2.70403	0.100095	0.58198
Gm20139	5.83156	1.47089	2.7084	0.0998211	0.58198
Tor4a	0.934238	5.97129	2.70114	0.100277	0.58198
Swap70	-1.13661	6.36175	2.70352	0.100127	0.58198
S100a8	1.51977	11.4703	2.70269	0.100179	0.58198
Mybpc3	2.45591	0.317539	2.70106	0.100281	0.58198
Cdc73	-1.41794	4.32798	2.70995	0.0997244	0.58198
Dr1	-1.22385	5.04425	2.70064	0.100308	0.58198
Kif14	5.02997	1.07002	2.69696	0.10054	0.582499
Ankrd49	1.8221	4.23408	2.69579	0.100613	0.582499
Gm20707	-3.08624	2.31253	2.69583	0.100611	0.582499
Gdi1	-1.17658	5.85724	2.69795	0.100477	0.582499
Klra1	1.9565	3.81135	2.69398	0.100728	0.582538
Afap1l1	-2.76079	3.17535	2.69428	0.100709	0.582538
Coro1a	1.27292	9.32531	2.6923	0.100834	0.582617
Mib1	-1.13576	4.84421	2.69161	0.100878	0.582617
Akt1s1	-2.35747	2.5344	2.68949	0.101012	0.582617
Camsap1	-2.4022	2.12294	2.68969	0.100999	0.582617
Dennd2c	-2.09252	3.52354	2.68982	0.100991	0.582617
Itgad	5.09951	2.11596	2.68611	0.101227	0.583542
Zfp182	-2.29156	4.09505	2.68506	0.101294	0.583616
BC055324	3.68558	2.11021	2.68132	0.101532	0.584051
Rpa2	1.30023	5.53717	2.68249	0.101457	0.584051
Stx16	-0.978627	5.81045	2.68183	0.101499	0.584051
Trabd	1.49412	5.00154	2.6778	0.101756	0.584483
Qars	1.23775	6.54059	2.67911	0.101672	0.584483
Gm37691	-2.15914	3.07222	2.67759	0.101769	0.584483
Ccdc43	-1.35176	4.12272	2.67493	0.10194	0.585149
Zfas1	1.43602	5.99435	2.67239	0.102103	0.585149
Rabl6	1.94982	3.23938	2.67335	0.102041	0.585149
Mov10	2.3772	3.21457	2.67313	0.102055	0.585149
Dgkz	1.283	5.78331	2.67043	0.102229	0.585213
Keap1	1.0816	4.72678	2.66968	0.102277	0.585213
Zfp974	-2.9597	1.98347	2.67029	0.102237	0.585213
Bub1	6.65406	3.54018	2.66755	0.102414	0.585686
Zfp873	-2.20165	2.94412	2.6654	0.102552	0.586168
Dnmbp	-3.22468	1.58001	2.65894	0.102969	0.587306
Dtymk	1.35409	4.72144	2.66123	0.102821	0.587306
Rfc3	1.54259	3.98809	2.65956	0.102929	0.587306
Pwwp2a	-1.73763	2.85575	2.66034	0.102879	0.587306
Mat2a	-0.930876	6.39645	2.65184	0.10343	0.587449
Cd22	-1.0333	7.13079	2.65446	0.10326	0.587449
Nup37	1.75227	3.42894	2.65372	0.103308	0.587449
Tmem184c	-1.43198	4.13879	2.65321	0.103341	0.587449
Samd4	-3.30502	2.82896	2.65278	0.103369	0.587449
G3bp2	-1.18084	7.76452	2.65667	0.103116	0.587449
Ints2	-1.4706	3.47005	2.65211	0.103412	0.587449
Pex11b	2.19665	3.02062	2.65342	0.103328	0.587449
Ly6i	2.22458	5.96401	2.64993	0.103554	0.587845
Nsun4	-1.50457	3.33249	2.648	0.10368	0.587939
2310075C17Rik	-4.27592	1.6004	2.64838	0.103655	0.587939
Zfp85	-2.36698	2.96538	2.6459	0.103818	0.588409
Dck	-1.2357	4.83545	2.64399	0.103943	0.588498
Fanci	2.93083	3.03681	2.64408	0.103937	0.588498
Dnajb9	-1.68827	3.65641	2.64001	0.104203	0.588909
2810004N23Rik	1.77473	4.20178	2.63954	0.104234	0.588909
Vipas39	1.07912	5.43887	2.64043	0.104175	0.588909
Nedd4l	-2.6198	2.64306	2.64147	0.104107	0.588909
Stard10	-2.3693	4.45792	2.6383	0.104315	0.589062
Anapc15	1.23629	3.97036	2.63611	0.104459	0.589372
Marcksl1	1.67139	4.99338	2.6358	0.10448	0.589372
Qk	-1.05404	5.94528	2.62611	0.105119	0.590959
Dhx57	-1.04362	4.71294	2.62517	0.105181	0.590959
Crispld2	2.98794	4.02902	2.62535	0.105169	0.590959
Tceanc	-2.33026	2.50785	2.62398	0.10526	0.590959
Gm32633	2.39979	2.57163	2.62376	0.105275	0.590959
Pitpna	0.953937	7.06028	2.63053	0.104827	0.590959
Gm11427	-1.43814	5.21137	2.62253	0.105356	0.590959
Fance	2.49293	1.97085	2.62829	0.104975	0.590959
Kdm1b	-1.67403	3.96588	2.62299	0.105326	0.590959
Stk38l	-2.42884	3.09464	2.62242	0.105364	0.590959
Bspry	3.57649	1.98536	2.62705	0.105057	0.590959
D330041H03Rik	-2.69005	1.58272	2.62129	0.105439	0.591071
Efhd2	1.51133	4.89579	2.61804	0.105655	0.591373
Meaf6	-1.76233	2.72701	2.61522	0.105843	0.591373
Fn3k	-3.30804	2.84623	2.61745	0.105694	0.591373
Fnbp1l	-5.95503	0.897097	2.6144	0.105897	0.591373
1110038B12Rik	2.0745	2.7425	2.61389	0.105931	0.591373
Lrp4	5.12849	0.792056	2.61627	0.105773	0.591373
Bbc3	3.10099	1.2368	2.61443	0.105895	0.591373
Cyfip1	1.15492	6.0238	2.61551	0.105823	0.591373
Slc22a4	-3.32083	3.50739	2.61289	0.105999	0.591441
Btbd9	1.39213	4.37661	2.61055	0.106155	0.592009
Actb	1.16589	11.1232	2.60659	0.10642	0.592673
Gpd2	-1.28418	4.48473	2.60631	0.106439	0.592673
Galk1	2.50804	2.64196	2.60719	0.10638	0.592673
Zmym1	-1.46752	3.8129	2.60123	0.106781	0.593042
Arid5a	1.20383	5.0335	2.60195	0.106732	0.593042
Ptgir	2.62199	2.71498	2.60165	0.106753	0.593042
Ficd	3.25152	1.62521	2.60429	0.106575	0.593042
Ttk	5.08778	2.12021	2.60162	0.106754	0.593042
Trim33	-1.04189	5.40353	2.59945	0.106901	0.593098
Csf1	2.58638	3.05022	2.59949	0.106898	0.593098
Gm11613	3.40454	1.30698	2.59769	0.10702	0.593452
A430005L14Rik	1.60777	3.59652	2.58303	0.108015	0.593868
Phf3	-0.948421	6.26542	2.58159	0.108113	0.593868
Itgam	1.47669	6.30036	2.57991	0.108228	0.593868
Gm49284	-2.73956	1.73917	2.58563	0.107837	0.593868
Oma1	1.23047	4.03419	2.58824	0.10766	0.593868
Pbx3	3.02701	2.30449	2.58027	0.108203	0.593868
Fhdc1	-2.8473	3.6175	2.58595	0.107816	0.593868
Serpinb6a	1.3644	7.16219	2.58597	0.107814	0.593868
Aff4	-1.14675	5.58738	2.59212	0.107397	0.593868
Nxpe4	-1.73452	5.04483	2.59016	0.10753	0.593868
Hmgb2	1.46004	7.19965	2.58272	0.108036	0.593868
Gsap	1.11944	6.07609	2.59336	0.107312	0.593868
Rars	1.02838	5.99099	2.57884	0.108301	0.593868
Snapc3	-1.65291	3.72914	2.58109	0.108147	0.593868
Mup3	-9.60141	6.11817	2.57991	0.108228	0.593868
Ccdc86	2.66408	3.03881	2.59568	0.107156	0.593868
Aig1	1.85157	3.29425	2.58736	0.10772	0.593868
Mob4	-0.929922	5.47273	2.57876	0.108307	0.593868
Rpn2	0.906347	7.28061	2.58008	0.108216	0.593868
Trim26	0.990243	6.06789	2.59248	0.107372	0.593868
Kcnab2	1.28988	6.08681	2.57913	0.108281	0.593868
4930523C07Rik	-0.857081	6.31088	2.58901	0.107607	0.593868
Eftud2	1.0356	5.58941	2.57423	0.108617	0.594049
Asf1a	-1.54265	4.55044	2.56948	0.108943	0.594049
Zfp113	-2.08418	2.72056	2.57447	0.1086	0.594049
Arrdc3	-1.1541	6.0791	2.57257	0.108731	0.594049
Fes	1.2526	6.28865	2.56969	0.108929	0.594049
Tmem156	-2.02908	4.19841	2.57185	0.10878	0.594049
Cit	-2.42456	3.80914	2.56945	0.108946	0.594049
Mxd3	3.48127	2.20684	2.57039	0.108881	0.594049
Sfxn5	1.54865	4.361	2.57048	0.108875	0.594049
Akt3	-1.22014	5.79587	2.57455	0.108595	0.594049
Ppa1	1.2482	5.20218	2.57248	0.108737	0.594049
Ntpcr	3.49253	2.05949	2.56188	0.109468	0.5942
Asnsd1	-1.34045	3.63218	2.5673	0.109094	0.5942
Akr1e1	-2.10648	2.98242	2.56409	0.109315	0.5942
Tmf1	-1.28696	5.02767	2.56749	0.109081	0.5942
Brcc3	1.10665	5.77874	2.56186	0.10947	0.5942
Fdx1	-2.5696	2.70493	2.56291	0.109397	0.5942
Tyk2	1.09331	5.6699	2.56375	0.109339	0.5942
Zfc3h1	-1.16645	5.40047	2.56233	0.109437	0.5942
5430403G16Rik	-2.92684	2.29168	2.56219	0.109447	0.5942
6030458C11Rik	-1.40724	4.44572	2.5605	0.109564	0.594413
Itch	-0.898265	6.46524	2.55955	0.10963	0.594472
Wdr24	2.44932	2.55449	2.55756	0.109768	0.59492
Rnf213	1.19144	8.12513	2.55478	0.109961	0.59507
Mlf2	1.08303	5.42969	2.55616	0.109865	0.59507
Gstz1	-3.1973	4.20282	2.5549	0.109953	0.59507
Iglc3	-1.53178	6.5004	2.55274	0.110103	0.595541
Gigyf1	-2.30134	1.97643	2.54857	0.110394	0.595621
Hexim2	2.4671	1.90633	2.55134	0.110201	0.595621
Kat2b	-1.16076	5.80748	2.54972	0.110314	0.595621
Mfsd7a	3.54085	2.82416	2.54893	0.110369	0.595621
Tarsl2	-2.55177	2.33345	2.54922	0.110349	0.595621
Zfp324	-2.16984	2.40117	2.54376	0.110731	0.596122
[truncated: 8,781 more rows]

## Sheet: PbNK65_Late-Early
SYMBOL	logFC	logCPM	LR	PValue	FDR
Nat8f2	51.5374	3.04482	108.942	1.67101e-25	1.80134e-21
Mbl2	48.2457	3.46007	102.606	4.08843e-24	2.20366e-20
Apoa5	43.7353	3.49144	96.4254	9.2669e-23	3.32991e-19
Cyp2c68	53.6987	3.49333	91.3488	1.20456e-21	3.24629e-18
Hnf4a	39.4838	2.26596	57.3922	3.57018e-14	7.6973e-11
Cfi	39.3132	2.2881	48.8006	2.83352e-12	5.09089e-09
Slco1b2	37.3622	1.6279	41.5292	1.16126e-10	1.78835e-07
Cyp2a5	33.559	2.05658	34.1789	5.0272e-09	6.77415e-06
Pzp	35.4345	5.04909	24.1894	8.7311e-07	0.00104579
Rgn	29.0011	3.05396	18.8694	1.39978e-05	0.0150897
Alb	43.0234	10.2259	17.5468	2.80327e-05	0.0253524
Cps1	29.342	3.24716	17.534	2.82215e-05	0.0253524
Cit	8.13309	3.80914	16.3221	5.34375e-05	0.044312
Cxcl15	16.8283	2.1342	15.8604	6.81911e-05	0.0525071
Ndufs5	5.17121	4.17891	15.232	9.50794e-05	0.0683304
Serpina3n	24.1956	1.98688	14.9716	0.000109144	0.0735358
Gstt1	13.2905	5.00308	14.5549	0.000136134	0.0863248
Tpx2	3.6675	5.27472	14.1907	0.000165184	0.0898882
Kif18a	6.86921	3.10294	14.3242	0.000153876	0.0898882
Mgll	6.35269	4.39977	14.081	0.000175107	0.0898882
Ddah1	22.3654	1.09905	14.1287	0.000170721	0.0898882
Plxna4os1	-10.3459	1.3677	13.5352	0.000234133	0.114725
Gm11274	-10.6475	3.40628	13.4103	0.000250251	0.117292
Sftpd	22.0029	1.94496	13.2492	0.000272691	0.122484
Lipg	13.165	2.91177	13.0653	0.000300821	0.126231
Scoc	6.06894	5.36017	12.9721	0.000316163	0.126231
Rora	7.78422	2.58157	13.0142	0.00030913	0.126231
Gc	34.3588	6.69065	12.7331	0.00035925	0.138311
Plpp1	9.90449	2.77756	12.5692	0.000392151	0.145772
Mbip	4.55737	3.48394	12.4319	0.000422071	0.151664
Hpx	34.3042	6.55187	12.3578	0.000439145	0.152709
Pck1	27.4791	2.93545	12.277	0.000458567	0.15448
Smim1	8.78131	2.66007	12.1671	0.000486399	0.15889
Slc22a4	10.7824	3.50739	11.9776	0.000538434	0.170715
Akr1c6	25.3816	3.78382	11.7311	0.000614657	0.184056
Aida	-2.43048	6.50275	11.7493	0.000608677	0.184056
Eif2a	-3.00841	5.57591	11.6764	0.000632982	0.18442
Elk3	-3.97251	4.00615	11.5796	0.00066679	0.189158
Lyrm9	4.69272	4.00812	11.4836	0.000702128	0.194075
Podxl	14.5746	1.5969	11.2972	0.000776248	0.20707
Cyp2f2	25.3541	1.78334	11.2703	0.000787558	0.20707
Ltf	6.77618	6.68887	10.9355	0.000943374	0.218658
Cd209a	-11.5858	2.60836	10.9394	0.000941406	0.218658
Uxt	3.29307	4.78344	10.9161	0.000953333	0.218658
Galnt9	-7.95172	1.49299	11.0864	0.000869616	0.218658
Atp2b4	5.33584	5.31855	11.0133	0.000904595	0.218658
1810037I17Rik	2.58107	5.80968	11.0421	0.000890643	0.218658
Itih2	22.7291	2.67202	10.6764	0.00108511	0.220778
Gpd1	13.6549	2.43347	10.7123	0.00106423	0.220778
Ttr	32.1968	6.55702	10.811	0.001009	0.220778
Atp5j2	3.45299	7.56633	10.6336	0.00111052	0.220778
Klhl21	3.88793	3.83446	10.7989	0.0010156	0.220778
Ndufa5	3.82431	4.90665	10.6073	0.00112642	0.220778
1110008P14Rik	4.11555	3.86545	10.6683	0.00108987	0.220778
Cdk5rap1	6.60216	3.40162	10.6998	0.00107148	0.220778
Tmem56	18.228	1.84219	10.533	0.0011726	0.223087
Serpinf1	21.7999	2.57508	10.522	0.00117959	0.223087
Cdk6	4.90669	4.11069	10.4896	0.00120047	0.223123
Gss	6.73387	5.49904	10.4052	0.00125662	0.227153
Ces1c	31.9799	5.44096	10.3939	0.0012643	0.227153
Hcfc1r1	5.02946	4.00661	10.3619	0.00128643	0.227339
Mgat4a	-2.79756	5.13718	10.1635	0.00143249	0.249068
Hax1	3.40684	6.03035	10.1127	0.00147252	0.249834
Pigh	-4.05827	3.73748	10.0707	0.00150642	0.249834
Borcs7	4.84702	3.6134	10.0851	0.00149475	0.249834
Wfikkn2	10.6892	1.51241	10.0387	0.00153285	0.250365
Gcdh	4.96082	4.52681	9.84403	0.00170384	0.274139
Spc24	5.35329	4.01692	9.80464	0.00174072	0.275955
Pole3	3.1656	4.50232	9.73157	0.00181129	0.280441
Gab3	5.43153	3.25847	9.7217	0.00182105	0.280441
Fam234b	9.55752	2.16781	9.67977	0.00186308	0.282873
Myh10	9.37187	2.10718	9.61713	0.0019277	0.28862
Serpina1a	27.7146	5.68433	9.44893	0.00211272	0.292398
Cdk8	3.57563	4.86313	9.42038	0.00214587	0.292398
Amigo1	-9.65158	1.55672	9.38317	0.00218987	0.292398
Mxra8	10.3551	2.17957	9.41547	0.00215163	0.292398
Adk	3.49612	5.62353	9.35507	0.0022237	0.292398
Maged1	8.24807	1.77289	9.5242	0.0020278	0.292398
Pkig	5.89019	3.36508	9.4391	0.00212408	0.292398
Clybl	7.01359	2.51529	9.35467	0.00222418	0.292398
Rint1	4.59908	3.39713	9.42695	0.00213819	0.292398
Pgrmc2	4.09841	3.72868	9.4025	0.0021669	0.292398
Fbxo34	3.63258	3.75728	9.21846	0.00239587	0.296868
Slfn9	-4.54538	4.13193	9.27499	0.00232304	0.296868
Fads1	7.81614	3.84242	9.28369	0.00231203	0.296868
Zfp26	-3.0787	4.46761	9.22299	0.00238995	0.296868
Slc16a1	3.84996	6.09305	9.2505	0.00235432	0.296868
Rai14	11.1545	1.85806	9.18823	0.00243576	0.298381
Fmo2	14.3686	1.33882	9.08402	0.00257853	0.305261
4932441J04Rik	-14.3635	0.229018	9.0652	0.0026052	0.305261
Sft2d3	-6.76323	2.19796	9.08697	0.00257437	0.305261
Il4	-7.77859	1.89135	9.07411	0.00259253	0.305261
Ndufs6	3.42105	5.30098	8.96944	0.00274533	0.318222
Atp5k	4.01576	7.51707	8.86025	0.00291448	0.334235
Bbs4	-6.63053	2.91826	8.76239	0.00307506	0.345304
Rnaseh2b	2.78066	5.27299	8.78093	0.00304396	0.345304
Bcas2	3.2087	6.08507	8.54702	0.00346088	0.351984
Abcb10	3.63441	5.188	8.56566	0.00342564	0.351984
Sftpa1	21.6403	3.2417	8.61801	0.00332855	0.351984
Timm10	3.75429	3.28767	8.52983	0.00349372	0.351984
A130071D04Rik	-8.70913	1.11963	8.55298	0.00344958	0.351984
Uqcr10	3.67978	6.45722	8.53574	0.00348239	0.351984
Mis12	-3.6698	4.69469	8.56216	0.00343223	0.351984
Camk2b	9.27353	0.748627	8.70206	0.00317851	0.351984
Usp46	4.35905	4.18573	8.62006	0.0033248	0.351984
Dlat	-3.12908	4.18857	8.58657	0.00338652	0.351984
Dhx8	2.08699	5.54484	8.62698	0.00331221	0.351984
Redrum	8.63057	4.74543	8.45433	0.00364175	0.361822
Prss34	-7.14259	2.81914	8.44599	0.0036585	0.361822
Mccc1	5.96995	2.52513	8.38054	0.0037926	0.365864
Wdr83os	4.35854	3.56607	8.40435	0.00374324	0.365864
Polr2c	3.56168	7.19626	8.37643	0.00380118	0.365864
Sh3tc2	11.7116	1.67338	8.35062	0.00385555	0.367813
Inmt	22.1557	3.9694	8.31224	0.00393789	0.372372
Egfr	18.3615	1.84322	8.27201	0.0040261	0.373807
Agmo	12.0626	2.14578	8.17463	0.00424804	0.373807
Atp5e	3.32983	7.9863	8.26253	0.00404717	0.373807
Miat	10.495	2.45559	8.13485	0.00434226	0.373807
Alyref2	-5.95468	1.66991	8.12364	0.00436917	0.373807
Incenp	3.04915	4.77256	8.19141	0.00420891	0.373807
Gm11427	3.65627	5.21137	8.14574	0.00431625	0.373807
2008-09-01	6.1241	3.04981	8.22829	0.00412423	0.373807
Carf	-7.70408	1.84729	8.22303	0.0041362	0.373807
Atp5j	3.35374	6.58394	8.25025	0.00407463	0.373807
Tulp3	10.8482	1.0297	8.16286	0.00427569	0.373807
Lsm6	2.57518	5.49452	8.13579	0.00433999	0.373807
Ndufb11	3.24476	6.99388	8.07093	0.0044981	0.37833
Ccna2	2.87138	6.63797	8.0592	0.00452733	0.37833
Ccnb1	5.31566	4.54405	8.08051	0.00447438	0.37833
Gstp1	3.28105	5.52218	8.03165	0.0045967	0.381173
Orm1	27.8266	4.59324	7.87119	0.00502286	0.384017
Ubap2l	4.35092	3.40086	7.92305	0.00488089	0.384017
Rab39	-6.25131	2.2299	7.97738	0.00473654	0.384017
Usmg5	3.08959	7.18552	7.95003	0.00480864	0.384017
F9	11.8523	1.80528	7.88568	0.00498278	0.384017
Clec4a1	8.63588	2.66617	7.87317	0.00501736	0.384017
Sparcl1	13.7251	1.91878	7.91279	0.00490866	0.384017
Trmt5	-4.72395	3.65611	7.89245	0.00496416	0.384017
Rbm14	3.90625	3.76252	7.92782	0.00486804	0.384017
Fgf1	13.562	1.45767	7.9679	0.00476142	0.384017
Tctn3	-6.5138	1.72768	7.87661	0.00500782	0.384017
Vtn	30.3859	4.64542	7.80265	0.00521696	0.396048
4933407K13Rik	-12.1769	1.13563	7.72525	0.00544537	0.408255
Fam109b	6.80142	2.1267	7.72256	0.0054535	0.408255
Rab21	2.60026	5.79094	7.66862	0.00561893	0.409765
Cox8a	2.93082	7.89799	7.63025	0.00573974	0.409765
Gt.ROSA.26Sor	4.4191	3.683	7.65374	0.00566548	0.409765
Dyrk3	9.16106	4.93192	7.65226	0.00567013	0.409765
Ndufc1	3.49249	4.4106	7.66093	0.00564295	0.409765
Tmem258	2.04985	6.39202	7.64066	0.00570671	0.409765
Gle1	-3.46655	4.83421	7.7024	0.00551475	0.409765
Sod2	3.71044	7.57923	7.54481	0.00601833	0.412318
Spg7	3.05409	5.38048	7.58245	0.00589391	0.412318
Dennd1a	-6.63717	1.57409	7.53546	0.00604964	0.412318
Rit1	2.40577	6.30668	7.52503	0.00608476	0.412318
Vangl1	6.12802	4.86061	7.52908	0.00607108	0.412318
Rundc3a	11.1755	3.96008	7.5147	0.00611975	0.412318
Itih3	21.1372	3.62703	7.55407	0.00598746	0.412318
Fxyd1	18.373	1.83278	7.59041	0.00586795	0.412318
Rasa4	-3.52491	3.8774	7.52222	0.00609425	0.412318
Zbtb26	5.70725	2.51596	7.48842	0.0062097	0.412568
1700096K18Rik	6.95233	1.70583	7.48016	0.00623827	0.412568
Serpina1d	29.8864	5.71683	7.48065	0.00623656	0.412568
Phf12	-3.55369	3.19082	7.43131	0.00640987	0.413668
Ighv5.4	-6.48733	1.86649	7.40307	0.00651126	0.413668
Zfp963	10.432	1.0947	7.39969	0.00652352	0.413668
Ncald	8.68044	2.70302	7.43261	0.00640525	0.413668
Gpm6a	11.2942	0.827131	7.44166	0.00637312	0.413668
Serpina1b	27.3179	6.47219	7.40321	0.00651075	0.413668
Rps6kc1	-3.72457	3.31275	7.42192	0.0064434	0.413668
Gm4285	9.64305	1.88407	7.37025	0.00663116	0.418034
Nedd8	2.30421	6.88569	7.35623	0.00668309	0.418858
Fam174a	-3.32791	4.69821	7.33416	0.00676562	0.42158
Cbx4	-4.08088	3.50489	7.29863	0.0069007	0.427526
Angptl3	21.7671	3.10598	7.26367	0.00703633	0.427613
Aip	3.91736	6.36706	7.23965	0.00713108	0.427613
Fgg	28.5607	5.45342	7.25312	0.00707779	0.427613
Ndufb9	2.78557	6.14286	7.26775	0.00702037	0.427613
Noct	3.59658	3.872	7.24917	0.00709337	0.427613
BC035044	-3.2861	4.46448	7.23738	0.00714011	0.427613
Hook3	2.64085	4.89484	7.21715	0.00722102	0.427706
Rnf14	3.29213	5.70366	7.218	0.00721763	0.427706
Lpcat3	2.53374	5.21913	7.19965	0.0072918	0.428375
Ephx2	19.1076	3.47843	7.19473	0.00731178	0.428375
Nfib	17.4577	2.11137	7.18441	0.00735399	0.428519
Col18a1	14.6778	1.89291	7.17065	0.0074106	0.429496
Ptch1	-4.51419	2.85156	7.13079	0.00757715	0.433796
Cdkn3	7.74728	2.50556	7.14281	0.00752651	0.433796
H2.DMb1	-2.81195	5.05545	7.12409	0.00760552	0.433796
1110034G24Rik	2.75843	5.19262	7.09359	0.00773599	0.436109
Ndufa3	3.74929	7.73767	7.10155	0.00770175	0.436109
Ces1d	10.5445	2.38834	7.08632	0.00776744	0.436109
Zfp868	-2.5472	4.19285	7.0711	0.00783371	0.437551
Brpf3	4.94524	4.09583	7.05272	0.00791449	0.438385
Ypel4	9.33205	3.48007	7.04922	0.00792996	0.438385
Ndrg2	6.11705	4.63851	6.93581	0.00844866	0.457535
Id1	7.78306	1.24459	6.89933	0.00862282	0.457535
Agpat5	-3.15093	4.4119	6.90223	0.00860881	0.457535
Gstp3	6.19529	4.02257	6.86933	0.00876875	0.457535
Il33	15.6851	1.35841	6.87302	0.00875065	0.457535
cl1	-5.39653	2.88441	6.90705	0.00858566	0.457535
1700030K09Rik	-5.44123	2.97101	6.86624	0.00878394	0.457535
Trim37	2.87438	5.15879	6.86588	0.00878568	0.457535
Gm13340	4.02782	3.29102	6.91176	0.00856307	0.457535
Stoml2	2.62445	5.2348	6.91295	0.00855737	0.457535
Slc31a1	2.50308	4.8768	6.88668	0.00868404	0.457535
Mdh2	2.32949	6.55808	6.93853	0.00843586	0.457535
Prr14l	-3.63805	3.76687	6.8438	0.00889493	0.460997
Ccl8	10.4981	0.611705	6.74777	0.00938649	0.47715
Cetn3	-2.93499	4.87548	6.7421	0.00941636	0.47715
Ddx10	-4.18797	4.06847	6.73991	0.00942792	0.47715
S100a13	2.43668	6.81467	6.76217	0.00931103	0.47715
Crip2	5.64992	2.69482	6.74591	0.00939627	0.47715
Sparc	15.9771	2.37959	6.68107	0.00974419	0.477465
Layn	7.49875	1.78505	6.68332	0.0097319	0.477465
A130014A01Rik	-4.79072	2.6559	6.7116	0.00957876	0.477465
Smyd1	10.3224	0.689428	6.69319	0.00967817	0.477465
Ube2s	2.6506	7.02519	6.69138	0.00968804	0.477465
Mlec	-2.0575	6.86781	6.7161	0.00955466	0.477465
Hmgcr	2.47466	5.18961	6.7209	0.00952894	0.477465
Pcbd2	3.67268	3.36034	6.60198	0.0101865	0.496882
Ndufa11	3.33847	5.68735	6.57699	0.0103306	0.501638
Ces2g	7.01606	2.61523	6.47951	0.0109125	0.50441
Mst1	14.2894	1.84159	6.50192	0.0107758	0.50441
Dennd1c	-5.13503	2.71389	6.5166	0.0106872	0.50441
Srr	4.35226	2.86369	6.44706	0.0111136	0.50441
Mpdu1	3.42906	4.87436	6.44178	0.0111467	0.50441
Serpina1c	27.2915	6.31119	6.42857	0.0112299	0.50441
Zfp605	-7.87062	2.14867	6.45191	0.0110833	0.50441
Lactb2	3.19447	3.82415	6.48398	0.0108851	0.50441
Fignl1	5.23962	3.65523	6.45107	0.0110886	0.50441
Gstm1	6.96909	4.7342	6.47644	0.0109314	0.50441
Asph	3.79628	3.78889	6.50793	0.0107395	0.50441
Apoa2	28.7829	6.69735	6.47568	0.0109361	0.50441
Vsig10	6.42771	1.32268	6.43094	0.0112149	0.50441
Ppie	-2.6416	4.34945	6.5166	0.0106872	0.50441
Dtx4	-5.44962	2.28325	6.54178	0.010537	0.50441
Slfn1	-2.37704	7.15179	6.55135	0.0104805	0.50441
S100a16	12.3871	1.44994	6.44371	0.0111346	0.50441
Pim1	2.68784	7.70238	6.51725	0.0106833	0.50441
Rars2	-2.63977	4.1723	6.41953	0.0112872	0.504881
Prps1	2.40989	5.60016	6.40148	0.0114025	0.507932
Klhl25	2.85083	5.25727	6.38446	0.0115124	0.510714
Rdh10	4.77496	2.48736	6.25366	0.0123937	0.511104
Trim30d	-2.46569	6.20724	6.29447	0.0121115	0.511104
Fermt2	14.3188	1.43865	6.30122	0.0120655	0.511104
Gbp5	-4.20915	5.71316	6.34581	0.0117659	0.511104
Pqbp1	2.17573	6.20073	6.19785	0.0127905	0.511104
Plekha3	-2.80203	4.37487	6.28466	0.0121787	0.511104
Thbs3	9.47652	1.34873	6.22394	0.0126035	0.511104
Ccdc25	-2.84948	4.8144	6.18982	0.0128487	0.511104
Bpifa1	13.6635	1.14128	6.27951	0.0122142	0.511104
C3	6.33989	7.55131	6.21862	0.0126413	0.511104
Brk1	1.89458	7.83346	6.34597	0.0117648	0.511104
Cldn12	13.443	1.15289	6.27395	0.0122525	0.511104
Hipk2	4.63757	3.44081	6.25794	0.0123638	0.511104
Ifit3	-3.78853	8.41969	6.30514	0.0120389	0.511104
Akip1	4.4772	3.18169	6.19318	0.0128244	0.511104
Zfp607a	-4.52355	2.76241	6.36735	0.0116239	0.511104
Trmt61b	5.00656	2.25073	6.35578	0.0117	0.511104
Gm4841	6.25195	4.11787	6.26288	0.0123294	0.511104
Abat	13.8907	1.79022	6.26719	0.0122994	0.511104
Cks1b	4.69898	3.76642	6.2825	0.0121936	0.511104
Pld3	3.35139	4.77962	6.21524	0.0126655	0.511104
Kcnk6	4.40418	3.3964	6.27677	0.0122331	0.511104
Cystm1	14.1958	1.51946	6.33613	0.0118303	0.511104
Tfec	-3.84552	3.02513	6.26345	0.0123254	0.511104
Tm4sf1	6.41215	2.26428	6.20485	0.0127401	0.511104
Ghr	17.6724	1.99144	6.21885	0.0126397	0.511104
6030458C11Rik	2.9211	4.44572	6.24038	0.0124869	0.511104
Rnaseh2c	4.5274	3.66153	6.23291	0.0125398	0.511104
Fbxo30	5.28108	6.28251	6.1568	0.0130908	0.512325
Snrnp48	2.61893	4.56106	6.17036	0.0129908	0.512325
Gm4045	6.01586	3.05295	6.11945	0.0133702	0.512325
Cmc2	4.36873	3.05197	6.14643	0.0131677	0.512325
Tspoap1	-7.10766	1.22218	6.12706	0.0133128	0.512325
Rnase4	7.45176	4.52141	6.15074	0.0131357	0.512325
Mtor	2.82144	4.31543	6.16261	0.0130479	0.512325
Smim7	2.09615	6.91524	6.13465	0.0132558	0.512325
Ifit2	-2.88088	7.23719	6.12432	0.0133334	0.512325
Nqo1	5.63156	4.20767	6.11523	0.0134022	0.512325
Gm30948	-7.7244	1.89201	6.15572	0.0130988	0.512325
Mup3	22.4526	6.11817	6.08389	0.013642	0.519649
Zfp317	-2.60353	4.66591	6.05579	0.0138607	0.523775
Gm12185	-4.89302	4.52388	6.05713	0.0138503	0.523775
Foxj2	-3.25376	3.54679	6.0513	0.0138961	0.523775
Tma7	2.25563	7.81361	6.0348	0.0140266	0.525333
Arl2bp	2.43042	6.54412	6.03375	0.0140349	0.525333
Tmem9	4.09145	3.35028	6.01236	0.014206	0.529899
Fgfrl1	5.80076	3.40044	5.98915	0.0143941	0.530834
Mrps21	2.52289	6.31564	5.98969	0.0143897	0.530834
Stk26	-2.41207	5.64069	5.97924	0.0144753	0.530834
Psrc1	-4.88685	2.54009	5.9951	0.0143456	0.530834
Timm17b	2.6819	5.02674	5.97899	0.0144773	0.530834
Uqcrq	3.78585	4.32381	5.94388	0.0147685	0.538014
Mtr	2.82386	4.7751	5.94335	0.0147729	0.538014
Kti12	-3.98455	3.03538	5.92342	0.0149409	0.538672
Plscr1	3.4415	4.52298	5.93205	0.0148679	0.538672
Fah	10.2246	3.60496	5.925	0.0149275	0.538672
Oaf	12.6099	1.8344	5.91338	0.0150263	0.539946
Rarres2	18.7212	4.16308	5.88586	0.015263	0.546627
Tomm7	2.00923	6.07008	5.87894	0.015323	0.546961
H2.DMb2	-1.81137	6.78706	5.87076	0.0153944	0.547697
3830406C13Rik	-2.98981	3.69684	5.85797	0.0155066	0.549874
Pde1b	-4.2409	3.37109	5.84411	0.0156293	0.552407
Anapc13	3.9504	5.65164	5.8355	0.0157059	0.5533
Tmem63b	5.5283	2.34508	5.82171	0.0158295	0.553757
Ighv5.6	-5.27864	1.42127	5.80063	0.0160205	0.553757
Galnt3	7.0333	1.22389	5.7805	0.0162049	0.553757
Ar	6.2883	1.2578	5.81439	0.0158956	0.553757
Irak1	2.31938	5.49621	5.79842	0.0160406	0.553757
Dnajb9	3.77283	3.65641	5.78539	0.0161599	0.553757
Hmgcs2	18.6704	3.81186	5.78047	0.0162052	0.553757
C1rl	5.78505	2.23933	5.81837	0.0158596	0.553757
Rbmx2	-4.25366	2.4651	5.7775	0.0162326	0.553757
Fbxo42	3.29665	3.71858	5.79796	0.0160447	0.553757
Dmtn	6.01898	4.33013	5.64338	0.0175214	0.553939
Pxmp4	3.39701	4.42166	5.70898	0.0168783	0.553939
Tacc3	4.90564	2.66161	5.74778	0.0165095	0.553939
Tsg101	2.78703	6.4497	5.6672	0.017285	0.553939
B3galt6	-5.51917	2.1136	5.69981	0.0169668	0.553939
Zfp777	-3.6082	2.93921	5.66337	0.0173228	0.553939
A930015D03Rik	5.73589	2.27293	5.65274	0.0174281	0.553939
Cgrrf1	3.6218	4.30059	5.72297	0.0167444	0.553939
Gm35657	-8.9084	1.1069	5.73855	0.0165965	0.553939
Ang	10.6807	2.79982	5.64521	0.0175031	0.553939
Tpk1	8.93124	1.57985	5.64641	0.0174912	0.553939
Lrrc8b	2.80537	4.14382	5.66253	0.0173311	0.553939
Klhl2	3.40755	4.44356	5.67814	0.0171775	0.553939
Hes6	2.82409	4.29456	5.70961	0.0168723	0.553939
Gvin1	3.48038	6.96999	5.65656	0.0173902	0.553939
Snrpf	-2.38676	4.78954	5.64551	0.0175001	0.553939
C2	11.5053	0.681431	5.70727	0.0168948	0.553939
Cog7	-3.23281	3.30006	5.71786	0.0167932	0.553939
Tgs1	-3.11765	4.40643	5.67406	0.0172176	0.553939
Cebpzos	3.30572	3.41323	5.72545	0.0167208	0.553939
Gm45705	-6.60518	1.82332	5.67408	0.0172174	0.553939
Mgp	13.4299	3.35198	5.72778	0.0166986	0.553939
Virma	-2.02592	5.61801	5.68654	0.0170956	0.553939
Mmgt2	-3.39878	3.68267	5.64326	0.0175226	0.553939
Igfbp5	12.9662	1.67748	5.70383	0.0169279	0.553939
Gm4208	8.97138	1.05045	5.63321	0.0176233	0.555496
Trp53inp2	5.77739	2.25867	5.6066	0.017893	0.55909
Crispld2	6.504	4.02902	5.61611	0.0177961	0.55909
Stra6l	17.4313	1.37335	5.60885	0.01787	0.55909
4632432E15Rik	8.38568	1.67698	5.59778	0.0179832	0.560286
Mgam	5.16665	3.02351	5.5923	0.0180396	0.560423
Dnajc16	4.02933	2.4547	5.56916	0.0182795	0.56301
Sec13	2.01261	6.85977	5.57273	0.0182423	0.56301
Spindoc	-8.32579	0.789965	5.57236	0.0182462	0.56301
Snx3	3.10744	7.01476	5.55185	0.0184611	0.566983
Car1	6.89556	3.81247	5.53968	0.0185899	0.569317
Mthfd1l	2.46617	4.50945	5.52339	0.0187639	0.571219
Timp3	9.37032	1.65974	5.51408	0.018864	0.571219
Iqsec1	2.55014	4.22097	5.51679	0.0188347	0.571219
Sp110	-1.77701	6.80682	5.51854	0.018816	0.571219
2410089E03Rik	6.38677	1.41136	5.50421	0.0189707	0.571241
Pltp	7.0292	3.22781	5.50438	0.0189689	0.571241
Ddx28	3.05595	4.20713	5.4902	0.0191233	0.572637
Rarb	-10.546	1.43761	5.49389	0.019083	0.572637
Ndufa7	2.54645	5.43286	5.47878	0.0192486	0.574793
Fasn	6.21142	3.73845	5.47117	0.0193327	0.575708
Ifi213	-2.80269	7.21726	5.46365	0.0194161	0.576599
Psmd9	4.61266	3.31644	5.43839	0.0196988	0.581789
Stk3	3.63635	5.49929	5.44141	0.0196648	0.581789
Uqcc1	-2.28774	4.64784	5.41891	0.0199197	0.586707
Kcnn3	-12.1985	0.35561	5.41346	0.0199821	0.586939
Gm32633	-4.47202	2.57163	5.38684	0.0202892	0.59273
Dedd	-4.03655	2.34867	5.39087	0.0202424	0.59273
Armc2	-8.17925	0.453791	5.37884	0.0203825	0.593846
Mtmr3	3.17754	8.62147	5.22111	0.0223144	0.595163
Mtch2	-1.79817	6.18923	5.19877	0.0226029	0.595163
Ogn	12.5393	1.71034	5.2449	0.0220111	0.595163
Tnip3	4.81096	2.54062	5.23378	0.0221523	0.595163
Fam83d	5.66262	0.617735	5.36514	0.0205431	0.595163
Mrpl20	2.20951	6.12608	5.28331	0.0215308	0.595163
Knop1	-2.40208	4.78566	5.33187	0.020939	0.595163
Cox7a2	3.38805	8.64255	5.31011	0.021202	0.595163
Rsl1	-3.64719	3.55907	5.33489	0.0209027	0.595163
Larp7	-2.17188	5.27617	5.26443	0.0217656	0.595163
Tecr	3.74443	3.39449	5.19611	0.0226376	0.595163
Gm6377	5.31994	2.5112	5.23733	0.0221072	0.595163
Zcchc2	-2.56826	4.35415	5.22753	0.0222321	0.595163
Angptl4	9.27791	1.89979	5.34121	0.020827	0.595163
Adrb2	2.18311	5.10284	5.23847	0.0220927	0.595163
Uchl3	-2.67392	4.72511	5.28006	0.021571	0.595163
Sppl2a	-1.63048	6.99551	5.25332	0.0219049	0.595163
St3gal2	3.73719	4.71766	5.35871	0.020619	0.595163
Fgl1	19.4389	2.45243	5.24449	0.0220164	0.595163
Map1lc3a	5.71246	2.8465	5.32933	0.0209695	0.595163
Fndc10	-10.4284	0.414871	5.28643	0.0214922	0.595163
Gpr89	2.97576	3.69942	5.30112	0.0213117	0.595163
Dapk2	4.96586	6.0005	5.31954	0.0210876	0.595163
Arg2	-4.02962	4.02043	5.26537	0.0217539	0.595163
Gm10095	2.28967	4.48711	5.23775	0.0221018	0.595163
Cox4i1	2.47066	8.15861	5.21116	0.0224424	0.595163
Cfap97	-2.18251	4.37104	5.30703	0.0212395	0.595163
Slx4ip	3.31109	2.92634	5.19634	0.0226345	0.595163
Tceanc2	2.27403	5.01123	5.20847	0.022477	0.595163
Cops6	2.52389	5.11014	5.25052	0.0219402	0.595163
5430425K12Rik	12.7721	0.996605	5.18776	0.0227465	0.595163
Arl8a	-4.04961	2.76893	5.19684	0.022628	0.595163
Enox2	-2.63088	3.99188	5.20773	0.0224867	0.595163
Dync1li2	1.69064	5.35858	5.19301	0.0226778	0.595163
H2afj	3.72737	4.58434	5.32569	0.0210133	0.595163
5031434O11Rik	-5.01018	1.5514	5.28394	0.021523	0.595163
Lpcat4	9.51461	1.03423	5.19085	0.0227061	0.595163
Rrm2	2.83291	5.35505	5.36888	0.0204992	0.595163
Sptlc1	-2.17172	5.22362	5.32232	0.021054	0.595163
Clcf1	-4.02898	3.06647	5.21099	0.0224446	0.595163
Rps28	1.94279	8.30882	5.24082	0.0220629	0.595163
Pet100	3.16942	7.2248	5.26974	0.0216992	0.595163
Nxt2	-4.12082	2.81317	5.18007	0.0228475	0.596357
Tet3	3.06429	4.26063	5.16622	0.0230302	0.59675
Mrps14	1.99447	5.49056	5.17377	0.0229304	0.59675
Aph1b	4.95746	2.36047	5.16218	0.0230839	0.59675
Hint1	2.16986	7.16052	5.16833	0.0230023	0.59675
Kdm6a	2.02069	5.91648	5.15683	0.0231551	0.597133
Odf2l	-5.81674	1.64949	5.15275	0.0232095	0.597133
Tmem134	2.35078	7.01693	5.14448	0.0233204	0.598557
Abhd11	3.01358	3.97604	5.10972	0.0237922	0.601995
Dcaf10	2.77658	5.1916	5.08165	0.0241803	0.601995
Pigr	15.0905	2.89528	5.09101	0.0240502	0.601995
Cbr2	8.3734	2.32052	5.08208	0.0241744	0.601995
Errfi1	6.11953	3.08882	5.09313	0.0240208	0.601995
Hpd	22.3275	4.90716	5.08467	0.0241383	0.601995
Gfi1	6.80807	2.54436	5.12688	0.0235581	0.601995
mt.Nd4	3.28759	8.83486	5.10488	0.0238586	0.601995
Nuf2	4.33513	3.86267	5.10907	0.023801	0.601995
Zfand6	3.23915	8.80251	5.12533	0.0235791	0.601995
Gon4l	-2.31632	3.97858	5.10483	0.0238594	0.601995
Slc6a13	8.02403	2.53207	5.11516	0.0237176	0.601995
Mki67	2.70163	7.99082	5.09985	0.0239279	0.601995
Plod1	3.41966	3.68402	5.07308	0.0243002	0.602226
Fbxo18	-2.07734	5.63366	5.06917	0.024355	0.602226
Gm41043	-9.67712	1.21471	5.06902	0.0243572	0.602226
Dgat2	6.41073	3.29376	5.06282	0.0244444	0.603
Fmo1	16.0037	1.76533	5.05589	0.0245423	0.604033
Nat8f1	5.53712	2.10792	5.03357	0.0248606	0.610472
Nars2	-3.61859	2.66731	5.02143	0.0250355	0.611979
Edf1	2.76254	6.06497	5.02406	0.0249975	0.611979
Fbxl14	-1.98803	4.80775	5.01322	0.0251545	0.613496
Snrnp35	-4.91127	1.97268	5.00407	0.0252878	0.615357
Nacad	9.58949	3.19055	4.99243	0.0254585	0.618114
Adck2	5.81763	1.58657	4.98399	0.0255829	0.618349
Bloc1s6	-2.09448	4.45488	4.98585	0.0255554	0.618349
C2cd2l	4.76589	2.16785	4.97798	0.0256719	0.619112
Mt1	7.8365	2.72928	4.97386	0.0257332	0.619206
Zfp473	7.48148	0.761321	4.92101	0.0265321	0.622131
Pigq	2.87467	6.49	4.92661	0.0264462	0.622131
Dram1	2.92261	4.81622	4.93789	0.0262742	0.622131
Kif3c	-4.0394	2.77547	4.94864	0.0261112	0.622131
Sec24a	3.21019	3.44895	4.90872	0.0267215	0.622131
Fgb	27.6114	5.23427	4.90134	0.0268359	0.622131
Sgpl1	-1.67897	6.0748	4.90267	0.0268151	0.622131
Hspa1b	6.65328	1.95674	4.90734	0.0267428	0.622131
Gusb	1.99371	6.03588	4.91256	0.0266621	0.622131
Pcx	8.74508	4.34024	4.91795	0.026579	0.622131
Cox7c	2.1003	7.14463	4.92727	0.0264361	0.622131
Ighv8.8	4.83413	2.16758	4.96125	0.0259215	0.622131
Gm26510	-4.40029	2.78851	4.95588	0.0260021	0.622131
Smarcc2	2.96917	3.18758	4.94072	0.0262311	0.622131
Slc14a1	3.45025	4.19449	4.90438	0.0267887	0.622131
Col4a1	9.41301	1.59399	4.94607	0.02615	0.622131
Peli1	-1.91401	5.49366	4.9368	0.0262906	0.622131
Gm13509	3.71589	2.1807	4.89277	0.0269694	0.622666
Gm28437	2.70498	5.2537	4.89244	0.0269745	0.622666
Ikbkg	2.15714	6.51747	4.8792	0.0271822	0.623456
Dnase1l2	-6.99047	1.54055	4.88537	0.0270852	0.623456
Ptpn9	4.02366	2.8834	4.87934	0.02718	0.623456
Dscc1	-5.22146	1.84366	4.86553	0.0273984	0.625752
Arid3a	-2.09914	4.72811	4.86851	0.0273511	0.625752
Lig1	3.43007	3.88029	4.85387	0.0275842	0.627663
Ddx58	-1.94491	7.04025	4.83487	0.0278897	0.627663
Limk2	-3.31712	4.49974	4.84181	0.0277777	0.627663
Trio	-4.3248	1.89835	4.84528	0.0277219	0.627663
Epb41l4b	11.6555	1.09088	4.8355	0.0278795	0.627663
Med12l	8.28626	1.50906	4.84615	0.0277079	0.627663
Crebbp	2.38376	4.55412	4.84357	0.0277495	0.627663
Ndufa13	2.61015	7.14297	4.81585	0.0281991	0.633306
Prkx	-2.26388	4.78472	4.80256	0.0284174	0.636882
Elp2	-2.14201	5.2422	4.79829	0.0284879	0.637137
Glrx2	3.17631	4.99526	4.78999	0.0286256	0.63889
Pqlc1	2.19877	4.97303	4.78568	0.0286974	0.639168
Ndufb7	3.32079	5.25168	4.77671	0.0288473	0.639318
9430015G10Rik	-3.78469	3.44855	4.77463	0.028882	0.639318
Acin1	2.2042	6.4872	4.77866	0.0288146	0.639318
Ddx19b	-2.31986	4.41758	4.77019	0.0289566	0.639657
2010107E04Rik	2.76094	7.76048	4.7428	0.0294212	0.647265
Glce	3.55335	3.25532	4.74604	0.0293657	0.647265
Tinagl1	4.79199	3.56093	4.72647	0.0297017	0.652107
Syne3	-4.01816	3.26946	4.71888	0.0298331	0.652335
C330027C09Rik	4.65416	3.19641	4.72111	0.0297944	0.652335
Slc7a11	-5.48975	3.07156	4.7113	0.0299649	0.65257
Trbv12.1	-4.16774	2.77983	4.7115	0.0299614	0.65257
Gabpa	-2.25467	5.26963	4.70327	0.0301052	0.654303
Calm3	2.32541	7.87879	4.6954	0.0302434	0.655983
Car3	14.9061	4.55751	4.67757	0.0305589	0.661495
Ubr3	2.40968	5.57733	4.67306	0.0306393	0.661906
Ptdss2	3.1198	4.33665	4.65791	0.0309108	0.662462
Ubxn1	1.9858	6.54899	4.6581	0.0309073	0.662462
Dnajc19	2.68087	4.36128	4.66397	0.0308019	0.662462
Zfp53	1.80413	5.4332	4.66028	0.0308681	0.662462
Slc35f5	3.42228	2.93025	4.64782	0.0310929	0.662909
Ngp	7.26091	4.87423	4.64316	0.0311776	0.662909
Gapt	-5.09762	2.476	4.65263	0.031006	0.662909
Gm28661	3.37736	4.27133	4.6449	0.031146	0.662909
Lcmt1	-2.57984	3.95542	4.63216	0.031378	0.664105
Gm36161	-2.0573	5.1158	4.61732	0.0316506	0.664105
D17H6S53E	-3.87168	3.73208	4.61385	0.0317147	0.664105
Tnfaip3	-2.43161	4.8199	4.60832	0.0318172	0.664105
Rnasel	2.8519	7.7656	4.62482	0.0315126	0.664105
Hspb8	12.5102	2.03074	4.60697	0.0318422	0.664105
Nipsnap1	3.43853	4.00795	4.60656	0.0318499	0.664105
Vat1	6.24672	1.97501	4.61057	0.0317755	0.664105
Socs5	-3.86432	3.3829	4.6097	0.0317916	0.664105
Zfp287	-3.80972	2.64761	4.63186	0.0313836	0.664105
Cmc1	3.29919	3.42596	4.56031	0.0327211	0.66626
Fga	26.7188	4.47649	4.55871	0.0327518	0.66626
Setd6	-2.35091	3.44265	4.58817	0.0321933	0.66626
mt.Co3	3.33958	2.94759	4.56	0.032727	0.66626
C530050E15Rik	-6.24275	2.49235	4.552	0.0328804	0.66626
Manea	-2.20311	4.19569	4.5811	0.0323264	0.66626
Iqcc	2.54833	3.61223	4.55222	0.0328761	0.66626
Cep128	2.46493	4.90306	4.55734	0.0327779	0.66626
Copg2	-1.7786	5.7601	4.58408	0.0322703	0.66626
Ccnb2	2.60468	5.9966	4.56071	0.0327134	0.66626
Aspm	5.71939	2.93748	4.56973	0.0325416	0.66626
Stambp	4.21446	2.6214	4.59343	0.0320948	0.66626
Zbtb20	4.20194	2.87838	4.5747	0.0324474	0.66626
Rnf128	6.88923	2.38337	4.58381	0.0322753	0.66626
Zfp948	7.25748	1.77378	4.58483	0.0322562	0.66626
Zfp869	-2.00731	5.12997	4.52117	0.033478	0.667084
3110002H16Rik	2.44357	7.00822	4.53342	0.0332391	0.667084
Mfsd1	-1.53337	6.23984	4.52181	0.0334655	0.667084
Msl2	-1.86699	5.54445	4.54224	0.0330683	0.667084
Abcc3	4.85989	2.49419	4.52747	0.0333549	0.667084
Fbxw2	2.45835	7.75249	4.53672	0.0331751	0.667084
Arpp19	1.59617	5.69081	4.52584	0.0333867	0.667084
Cnot10	-2.06749	4.70505	4.53404	0.033227	0.667084
Fabp5	2.43357	5.06316	4.53092	0.0332877	0.667084
Psme4	2.24958	7.47576	4.5179	0.033542	0.667126
Itih4	19.131	4.27543	4.51412	0.0336161	0.66737
Abhd5	2.39675	5.72413	4.50839	0.033729	0.668381
1110025M09Rik	-5.00766	1.96963	4.50421	0.0338114	0.668784
2410015M20Rik	2.36069	6.05725	4.49081	0.0340774	0.669008
Gm49024	8.20018	2.23657	4.44869	0.0349281	0.669008
Dtymk	-2.30856	4.72144	4.45427	0.0348142	0.669008
Gpr137b	-2.78886	3.66005	4.48287	0.0342362	0.669008
Gm5069	-7.10981	2.25659	4.47672	0.0343597	0.669008
Msra	2.37739	4.98152	4.47208	0.034453	0.669008
Gm11696	-4.67193	1.78963	4.44811	0.0349399	0.669008
Tuba4a	3.56569	9.41944	4.45655	0.0347676	0.669008
Slfn8	-2.16382	7.04656	4.48937	0.0341063	0.669008
Cox6b1	2.49544	7.85418	4.47935	0.0343067	0.669008
Slc25a40	-4.34617	2.75496	4.45189	0.0348627	0.669008
Hectd1	1.65426	7.16659	4.48735	0.0341465	0.669008
Triqk	-5.86755	1.99082	4.48598	0.034174	0.669008
Chchd2	1.94435	7.46091	4.47846	0.0343246	0.669008
Parp3	-2.06989	4.17583	4.45998	0.034698	0.669008
Melk	-6.09067	2.88916	4.45657	0.0347672	0.669008
Mug1	23.0967	4.60799	4.45107	0.0348794	0.669008
Fdft1	3.42944	4.61133	4.47353	0.0344238	0.669008
Rhoj	-3.80124	4.53587	4.442	0.0350652	0.670217
Apoa1	21.8929	5.37136	4.43502	0.0352087	0.670719
Fdx1	4.41969	2.70493	4.43468	0.0352159	0.670719
5430437J10Rik	8.09197	1.54153	4.42741	0.0353662	0.672395
Phf11b	-1.94139	7.38656	4.42389	0.0354392	0.672596
Tmem230	-3.08722	4.10694	4.40624	0.0358077	0.675795
2610005L07Rik	7.41252	1.59705	4.41206	0.0356856	0.675795
1500011B03Rik	2.97418	3.882	4.40382	0.0358585	0.675795
Padi2	-2.58794	3.33357	4.40785	0.035774	0.675795
Serping1	14.9961	4.40868	4.39835	0.0359737	0.676783
C1galt1c1	-2.77295	4.32554	4.38491	0.0362585	0.680953
Cep135	-3.18704	3.51899	4.35697	0.0368578	0.682444
Serpina1e	19.6492	3.39147	4.34883	0.0370343	0.682444
Zscan20	-4.32489	2.61736	4.36452	0.0366949	0.682444
Pdk1	-1.91225	5.85252	4.36162	0.0367574	0.682444
Ifi208	-2.94178	6.06423	4.35465	0.036908	0.682444
Msln	8.62446	1.34068	4.36165	0.0367566	0.682444
Ogdh	1.83169	6.46697	4.35299	0.036944	0.682444
Chmp2a	1.69349	7.3227	4.35264	0.0369516	0.682444
Ier3	5.34964	2.17895	4.35639	0.0368705	0.682444
Plg	24.0112	3.69436	4.35157	0.0369749	0.682444
Kiz	2.98813	3.94766	4.35019	0.0370049	0.682444
Gm17259	8.03965	2.00186	4.32696	0.0375132	0.69009
Ms4a4c	-2.41993	7.88843	4.31764	0.0377191	0.692695
C1ra	9.96831	2.94807	4.30519	0.0379964	0.695417
Pam	3.716	3.11822	4.30667	0.0379631	0.695417
Nudt1	5.65315	3.19094	4.29027	0.0383311	0.695639
Evl	-1.84172	5.30687	4.29199	0.0382924	0.695639
Atg10	-4.81238	2.50911	4.29769	0.0381643	0.695639
Sik1	-3.51626	2.98625	4.2931	0.0382673	0.695639
Atg2a	3.27564	3.58951	4.29827	0.0381511	0.695639
Serpinc1	22.8705	4.0944	4.27926	0.0385802	0.697875
Atp5b	2.63261	11.2319	4.2791	0.0385838	0.697875
Tbl3	2.53581	3.80128	4.27559	0.0386636	0.697998
Fabp1	27.0287	6.28158	4.2731	0.0387201	0.697998
Ube3b	1.88333	5.16928	4.2647	0.0389121	0.69912
Tle4	-1.99819	4.50339	4.26673	0.0388657	0.69912
A130010J15Rik	-3.2968	2.55386	4.24403	0.0393886	0.70055
Tgm1	7.42717	1.26228	4.24556	0.0393531	0.70055
Vcp	1.91291	8.49	4.24861	0.0392825	0.70055
Cdca3	2.81751	4.91397	4.24258	0.0394223	0.70055
Aldh1a7	12.2064	2.5112	4.25162	0.039213	0.70055
Zfp691	-3.93303	1.89363	4.24629	0.0393362	0.70055
Faah	2.69691	3.74268	4.24153	0.0394465	0.70055
Acbd3	-1.95897	4.87525	4.2365	0.0395636	0.701473
Pyurf	4.44293	2.84099	4.21625	0.0400385	0.705464
Ttpa	16.3039	2.97723	4.21857	0.0399838	0.705464
Kansl1l	3.53771	3.77975	4.21575	0.0400504	0.705464
Selenbp1	3.80175	5.95267	4.21971	0.039957	0.705464
Apob	23.0461	4.71253	4.2081	0.0402314	0.707495
Ficd	-5.41807	1.62521	4.19969	0.0404313	0.709852
Cops3	-1.83211	5.62853	4.19276	0.040597	0.710448
Cdk13	2.35623	4.42533	4.19432	0.0405597	0.710448
Bgn	10.1938	1.02168	4.18708	0.0407332	0.711676
Lgmn	2.27753	6.31488	4.13291	0.0420571	0.713977
Snx6	-1.78823	6.08046	4.14648	0.0417211	0.713977
Tmc4	-5.21571	1.79455	4.13792	0.0419327	0.713977
Poc5	2.77782	3.77725	4.14219	0.041827	0.713977
Folr2	6.88534	2.45381	4.16323	0.0413106	0.713977
Prkacb	-1.41876	6.40281	4.14443	0.0417718	0.713977
Prdx1	1.87265	8.42684	4.14029	0.0418739	0.713977
Ttc12	-7.91674	0.678816	4.16259	0.0413261	0.713977
Nploc4	1.83038	5.46471	4.1617	0.041348	0.713977
Hmox2	-1.63703	6.00013	4.1555	0.0414994	0.713977
Nxt1	3.14791	4.02361	4.14463	0.0417669	0.713977
Orc1	7.28369	1.35902	4.17482	0.0410289	0.713977
Tigd5	-8.38223	0.433869	4.16978	0.0411512	0.713977
Ndufb8	2.46869	5.22328	4.1347	0.0420124	0.713977
Rpl28	2.24819	9.11597	4.17189	0.0410999	0.713977
Zfp595	-3.02069	3.65163	4.14111	0.0418537	0.713977
Gm8730	2.49473	3.96727	4.14669	0.0417159	0.713977
Cep63	-1.99108	4.56458	4.13594	0.0419818	0.713977
Rexo2	3.97361	8.38959	4.1267	0.0422115	0.715472
Mkks	-4.65542	2.37437	4.10657	0.042717	0.716959
Mttp	14.9158	1.41426	4.09942	0.0428979	0.716959
Nhsl2	3.9086	3.44218	4.11093	0.042607	0.716959
Ankrd37	4.61053	2.62751	4.11569	0.0424873	0.716959
Rph3al	6.60919	3.32094	4.11226	0.0425734	0.716959
Taf4b	2.94881	3.26433	4.10636	0.0427222	0.716959
Fcho2	2.39976	5.26391	4.10439	0.0427721	0.716959
Trmo	-2.72897	3.43395	4.10158	0.0428432	0.716959
Mrpl27	3.12492	4.33072	4.11368	0.0425377	0.716959
Tmem243	-1.81419	5.53767	4.09287	0.0430645	0.717705
Gm20139	-11.0495	1.47089	4.09243	0.0430756	0.717705
Sc5d	2.17908	4.88741	4.07834	0.0434362	0.718019
Snx8	-2.16045	4.55855	4.07808	0.0434429	0.718019
Lpin2	2.34241	7.17949	4.07869	0.0434273	0.718019
Cfdp1	-1.82476	5.59771	4.08472	0.0432727	0.718019
Mnt	-4.54494	1.58892	4.07093	0.0436273	0.718019
Etfb	6.07072	1.68207	4.07304	0.0435728	0.718019
Fbxl20	2.23414	4.60139	4.07375	0.0435544	0.718019
Gata3	-5.55138	1.54447	4.07926	0.0434127	0.718019
Eif2d	2.32333	4.78674	4.03079	0.0446771	0.718622
Ecd	-1.77113	5.2078	4.02626	0.0447972	0.718622
Dbi	3.16466	5.34121	4.03804	0.0444855	0.718622
Lyve1	9.35654	2.25271	4.03412	0.0445888	0.718622
Gm29216	3.28663	6.31349	4.04083	0.0444119	0.718622
Crat	3.99942	6.697	4.02919	0.0447194	0.718622
Socs6	-2.29506	3.71914	4.055	0.0440408	0.718622
Gm32585	-8.44896	1.26457	4.02891	0.0447268	0.718622
Naa38	2.67684	4.03959	4.05602	0.044014	0.718622
Trappc2l	1.84873	5.80688	4.02988	0.0447011	0.718622
Paqr4	6.35356	2.92214	4.03437	0.0445824	0.718622
Cyp39a1	5.82118	1.68155	4.05675	0.043995	0.718622
Sowaha	8.27122	4.15092	4.02733	0.0447688	0.718622
Mrps35	-2.04944	4.36139	4.02709	0.0447752	0.718622
Ndufa2	2.05885	6.18442	4.06652	0.0437413	0.718622
Acox1	3.37378	5.3065	4.034	0.044592	0.718622
Swt1	2.84754	6.45931	4.03376	0.0445984	0.718622
Cox7b	2.71266	8.95332	4.02238	0.0449003	0.718956
Vps29	1.58066	5.68831	4.02046	0.0449514	0.718956
Gm17491	-3.00283	3.24384	4.01689	0.0450467	0.719412
Ibtk	2.18982	7.29102	4.00828	0.0452773	0.71991
Mpzl3	-3.53806	3.50079	4.00825	0.0452782	0.71991
Enpp2	11.5902	2.50495	4.01027	0.045224	0.71991
Fmo5	6.01448	2.83395	4.00128	0.0454658	0.721614
Sec14l1	2.628	4.43455	3.9993	0.0455192	0.721614
Btd	4.18499	3.29559	3.99159	0.0457278	0.723094
Maob	15.6147	1.66703	3.9909	0.0457468	0.723094
Zfp790	-3.0019	3.42792	3.98434	0.045925	0.723861
Prkar1a	-1.50017	6.77901	3.98417	0.0459296	0.723861
Zbtb32	5.15191	3.24163	3.97581	0.0461584	0.723997
Arrdc2	2.57746	3.39815	3.97406	0.0462062	0.723997
Prpf40a	-1.60914	5.69677	3.96953	0.0463306	0.723997
Gpr27	7.77014	0.159328	3.96812	0.0463696	0.723997
Il12rb1	3.98337	3.04752	3.97314	0.0462314	0.723997
Gsta4	8.90177	1.86219	3.97439	0.0461972	0.723997
Pex10	4.76759	1.40766	3.96671	0.0464083	0.723997
Phf14	-1.85074	5.2332	3.96106	0.0465645	0.725383
Zfp952	-2.47338	4.22555	3.93881	0.0471841	0.725669
Txn1	1.55567	7.46474	3.94006	0.0471492	0.725669
Gad1	-5.60376	3.6796	3.93551	0.0472767	0.725669
Gprasp1	-2.83201	4.2168	3.92669	0.0475253	0.725669
2810013P06Rik	-2.49197	4.43518	3.94615	0.0469787	0.725669
Hif1an	-2.04331	4.60896	3.93416	0.0473148	0.725669
Polr3b	-1.79442	5.10899	3.92774	0.0474957	0.725669
Desi1	4.57052	3.53511	3.93147	0.0473904	0.725669
Fancd2	3.24382	3.54652	3.9409	0.0471255	0.725669
Gm14295	6.29879	1.10268	3.93141	0.0473923	0.725669
Rbm43	-1.42906	5.95442	3.93688	0.0472383	0.725669
Spata2l	7.32393	1.32592	3.92722	0.0475104	0.725669
Trir	1.83959	7.15489	3.94756	0.0469395	0.725669
Cdc6	4.68541	3.25506	3.9335	0.0473332	0.725669
5430427O19Rik	-1.93699	4.97653	3.92194	0.04766	0.726697
Rps29	2.69719	9.59232	3.91419	0.0478802	0.729023
Ckap2	4.01512	3.29815	3.91175	0.0479498	0.729053
Med28	1.7034	6.12925	3.89887	0.0483186	0.732584
Tlcd2	8.57844	1.83423	3.89765	0.0483538	0.732584
Lag3	5.04307	3.0931	3.89637	0.0483906	0.732584
Thoc5	-2.05746	4.56043	3.89418	0.0484538	0.732584
Narf	2.73691	6.24642	3.88023	0.0488578	0.73457
Fn3k	6.73972	2.84623	3.88071	0.048844	0.73457
Olfml2b	7.68698	1.04905	3.88143	0.0488229	0.73457
Romo1	3.24781	3.49663	3.88484	0.048724	0.73457
Cln6	-5.4208	1.83499	3.87176	0.0491051	0.734669
4930453N24Rik	1.49688	6.35355	3.87183	0.0491031	0.734669
Ubl5	2.21984	8.38767	3.87067	0.0491369	0.734669
Bard1	6.32455	1.19597	3.87543	0.0489978	0.734669
Lrp12	6.2235	0.748544	3.86626	0.0492662	0.735582
Pi4k2b	2.59116	5.12118	3.8606	0.0494325	0.736026
2310039H08Rik	3.38838	2.47765	3.86276	0.0493689	0.736026
Orai2	-1.70385	5.81757	3.82315	0.050549	0.738086
Gm4070	2.90782	6.51822	3.83432	0.0502132	0.738086
Zscan26	-1.8499	4.9165	3.82846	0.0503893	0.738086
Tmem250.ps	-2.4615	3.66179	3.81287	0.0508602	0.738086
Ighv1.39	-6.86187	1.02279	3.80371	0.0511392	0.738086
Alox5	-1.99051	5.07342	3.83168	0.0502924	0.738086
Carnmt1	-3.16805	3.37496	3.81127	0.050909	0.738086
Polr3g	-3.64041	3.02672	3.80469	0.0511091	0.738086
Cox6c	3.05795	8.49082	3.81386	0.0508303	0.738086
Pif1	-4.91245	2.05336	3.81987	0.0506481	0.738086
Pogz	-3.54736	3.19849	3.83348	0.0502384	0.738086
Ighv5.16	-5.20555	1.33575	3.8345	0.050208	0.738086
Cep170	-2.14783	5.11836	3.84957	0.0497586	0.738086
Mtrr	-2.35505	3.47196	3.84303	0.0499533	0.738086
Znhit6	2.96449	3.51541	3.80851	0.0509927	0.738086
Zfp61	-3.93434	2.58908	3.80806	0.0510064	0.738086
Capn10	-3.46547	2.37918	3.81082	0.0509225	0.738086
Serpina3k	26.1305	7.45872	3.84138	0.0500023	0.738086
Ccar2	-2.72078	4.27881	3.82659	0.0504455	0.738086
Csf3r	-2.43219	7.16393	3.83851	0.0500879	0.738086
Prkaa2	-8.07814	1.07328	3.82987	0.0503469	0.738086
Sox6	4.69896	5.00923	3.8035	0.0511457	0.738086
Selenoh	2.04851	4.06925	3.82265	0.0505642	0.738086
Ssh1	3.3857	3.24026	3.80038	0.051241	0.738474
Gemin8	-7.8183	1.10481	3.73775	0.0531961	0.74012
Rpl38.ps2	2.79586	5.64634	3.77244	0.0521035	0.74012
E2f8	-7.73447	0.61705	3.7538	0.0526877	0.74012
Wdr89	3.20457	2.41419	3.78882	0.051596	0.74012
Nif3l1	-2.10025	4.21843	3.73734	0.053209	0.74012
Gpld1	9.55629	1.31756	3.75525	0.052642	0.74012
Zbtb18	-3.06725	4.33267	3.78488	0.0517177	0.74012
Trpm2	-2.45524	4.74185	3.75965	0.0525036	0.74012
0610009L18Rik	-6.18608	1.23856	3.74048	0.0531091	0.74012
Srprb	-2.10216	3.95488	3.77765	0.0519415	0.74012
Slfn5	-2.14345	7.54139	3.76207	0.0524277	0.74012
Prrc2c	-1.7163	5.52647	3.75735	0.0525759	0.74012
Acoxl	6.08444	1.07991	3.76143	0.0524478	0.74012
Il10	6.44141	2.2097	3.74091	0.0530955	0.74012
Slc4a1ap	-2.0154	4.52174	3.76692	0.0522758	0.74012
Fryl	1.52932	6.0364	3.74186	0.0530655	0.74012
Gm10180	6.66869	2.39258	3.77087	0.0521524	0.74012
Tma16	-3.05692	2.57393	3.79161	0.0515101	0.74012
Bag1	3.03972	9.84954	3.74253	0.053044	0.74012
Hc	23.2086	3.68092	3.74399	0.0529977	0.74012
Sfxn2	-2.47805	3.86455	3.74265	0.0530403	0.74012
Col3a1	11.0082	3.14181	3.77046	0.0521653	0.74012
Znrd1as	-8.1231	1.40817	3.77392	0.0520575	0.74012
Bag6	2.46352	3.99186	3.77431	0.0520454	0.74012
Tspan8	4.36933	5.29921	3.7571	0.0525838	0.74012
Tmem87b	-2.5402	4.31459	3.79134	0.0515182	0.74012
Tbc1d10b	2.22838	4.47932	3.76717	0.0522679	0.74012
Aurkb	4.53155	3.6944	3.72559	0.0535846	0.741653
Mmp14	6.8973	2.18797	3.72101	0.053732	0.741653
Dst	5.5134	0.941446	3.72464	0.0536153	0.741653
Thrsp	14.5391	2.96872	3.72154	0.0537149	0.741653
Atp5l	3.09713	8.94277	3.72104	0.0537308	0.741653
Cyp2e1	18.9319	4.61942	3.72143	0.0537184	0.741653
Pygm	5.64221	1.89495	3.71587	0.0538974	0.742228
Slc15a4	-1.52107	5.31025	3.66872	0.0554426	0.742228
2500004C02Rik	4.11462	2.65293	3.67444	0.0552527	0.742228
Gem	-3.05486	3.88489	3.64758	0.0561509	0.742228
Trmt6	-2.28494	4.39619	3.62661	0.0568627	0.742228
Igfbp2	19.8211	2.46166	3.66946	0.055418	0.742228
Chchd10	4.69132	4.78161	3.66877	0.0554411	0.742228
Mmp13	11.994	2.05896	3.68823	0.0547976	0.742228
Eme1	7.45969	1.76446	3.64483	0.0562436	0.742228
Gm4610	-4.20649	1.8364	3.64866	0.0561144	0.742228
Zfp993	-8.29237	0.869496	3.64228	0.0563296	0.742228
Champ1	-2.91119	3.26251	3.62432	0.0569408	0.742228
Snap47	3.01892	3.37808	3.64826	0.056128	0.742228
Zfp84	-2.07065	3.89252	3.63889	0.0564445	0.742228
Gm5431	-3.13639	4.54752	3.65409	0.0559316	0.742228
Ubxn2b	-3.17694	3.44902	3.68887	0.0547768	0.742228
Clca3a1	5.41839	3.72507	3.63618	0.0565365	0.742228
Nup43	-4.17209	3.27875	3.66181	0.055673	0.742228
Slc23a1	11.2808	3.63678	3.64343	0.0562909	0.742228
Fnbp1l	9.64289	0.897097	3.66617	0.0555275	0.742228
Fbxo4	-2.42788	4.58227	3.62789	0.0568188	0.742228
Fam76a	2.73883	3.67026	3.62579	0.0568907	0.742228
Abraxas1	-3.8203	2.90327	3.66829	0.0554569	0.742228
Ada	4.13017	3.05679	3.63143	0.0566979	0.742228
Fam98b	6.33488	1.75254	3.70447	0.0542671	0.742228
Ascc1	5.07518	1.90186	3.70569	0.0542273	0.742228
Efr3a	-1.52852	6.06973	3.63308	0.0566419	0.742228
Ggps1	1.83191	6.3866	3.68442	0.0549231	0.742228
Rrp8	-3.52568	3.33873	3.67185	0.0553387	0.742228
Nid1	-5.59582	2.7691	3.62696	0.0568506	0.742228
Apoc3	18.5228	3.92841	3.65089	0.0560392	0.742228
Tmem87a	-1.98554	5.45403	3.71292	0.053993	0.742228
Rpl35	2.12353	9.28953	3.70672	0.0541937	0.742228
Agpat2	3.05441	3.7373	3.62552	0.0568997	0.742228
Pmp22	6.90456	3.31815	3.7011	0.0543767	0.742228
Ulbp1	5.67171	2.75814	3.709	0.05412	0.742228
Katna1	1.6904	6.84287	3.67611	0.0551975	0.742228
Wls	-1.99718	4.6049	3.63745	0.0564933	0.742228
Ipcef1	-1.80937	6.66821	3.67086	0.0553717	0.742228
Ankrd13c	1.93653	5.44038	3.64211	0.0563356	0.742228
Gsta3	17.7796	4.22426	3.65675	0.0558425	0.742228
Simc1	-4.16455	2.56943	3.69102	0.0547063	0.742228
Phactr3	-6.67176	1.12148	3.66089	0.0557038	0.742228
Dock8	-1.49302	6.09658	3.64021	0.0564	0.742228
Akap13	1.86299	5.41639	3.67537	0.0552219	0.742228
Igf1	18.4133	3.64658	3.65145	0.0560203	0.742228
lr	9.29945	1.49713	3.6201	0.0570854	0.743214
Asb2	6.71817	0.825364	3.61047	0.0574167	0.743217
Ryk	4.52392	2.5918	3.61363	0.0573078	0.743217
Chil5	5.23617	2.36634	3.61082	0.0574048	0.743217
Piwil2	8.80708	1.05055	3.61008	0.0574304	0.743217
po1	-1.56795	6.51353	3.61017	0.0574272	0.743217
2009-03-01	6.49066	1.23968	3.60341	0.0576611	0.743586
Cttnbp2nl	7.93994	1.10745	3.60327	0.0576659	0.743586
Tchp	-3.20673	2.83876	3.60722	0.0575293	0.743586
Atp6v0d1	1.94639	6.68371	3.59601	0.0579184	0.745541
Sftpc	21.5683	5.62176	3.59494	0.0579558	0.745541
Zcchc17	1.83336	5.77024	3.59056	0.0581085	0.746615
Fahd1	5.15219	3.6721	3.58693	0.0582356	0.747254
Trem2	5.02685	2.29181	3.58519	0.0582969	0.747254
Ppp2r5b	5.35481	5.26837	3.57429	0.0586807	0.75128
Aldob	21.974	5.99269	3.5675	0.058921	0.752569
Zfp341	6.5219	1.62925	3.56913	0.0588632	0.752569
Aldh7a1	5.21623	3.51551	3.56226	0.0591072	0.753416
Ighv12.3	-6.30524	1.76789	3.56015	0.0591825	0.753416
Itpkb	-1.45449	4.89671	3.55974	0.059197	0.753416
Zfp934	-3.87982	2.45482	3.55276	0.0594464	0.755699
Entpd1	-1.87871	6.05721	3.54761	0.0596312	0.757154
Frmd6	-3.75944	2.45633	3.5359	0.0600538	0.758344
Ndufa4	1.83588	7.87835	3.53664	0.0600271	0.758344
F2	22.5283	3.89813	3.53527	0.0600766	0.758344
Bicd1	6.51818	0.846905	3.53708	0.060011	0.758344
Ifi204	-1.68917	8.05804	3.53986	0.0599104	0.758344
Invs	-2.84627	3.13999	3.52986	0.060273	0.759819
Gpd1l	-1.48537	5.99395	3.52574	0.0604228	0.759819
Pmf1	5.37323	1.98949	3.5243	0.0604754	0.759819
Atf5	4.76457	2.88981	3.52781	0.0603473	0.759819
Sap18	1.43446	5.37048	3.52012	0.0606279	0.760848
Zfand5	1.68068	6.69589	3.51763	0.0607191	0.761107
Prpf38a	-2.00602	5.27602	3.51184	0.0609318	0.761931
Mib2	-3.2109	2.72629	3.51159	0.0609411	0.761931
Pld1	3.6137	2.71521	3.51007	0.0609968	0.761931
Tmem81	-3.31577	2.93402	3.50666	0.0611225	0.762617
Cript	2.9479	8.50036	3.50135	0.0613187	0.76418
Gata1	3.73745	4.98916	3.49528	0.0615439	0.766101
Rmdn2	6.89112	1.16404	3.42529	0.0642049	0.768688
Cenpq	3.22083	6.11951	3.42694	0.0641407	0.768688
Adarb1	6.22465	1.15784	3.42237	0.0643188	0.768688
Gm15708	-5.79629	0.889538	3.45383	0.0631054	0.768688
Kyat1	4.47146	2.30677	3.47839	0.0621753	0.768688
Akr1e1	3.6135	2.98242	3.47686	0.0622328	0.768688
Eif3j1	1.70205	6.20225	3.47106	0.0624514	0.768688
Uqcr11	3.64828	6.23966	3.45863	0.0629225	0.768688
Armc7	-2.13242	4.4105	3.44929	0.0632789	0.768688
Sympk	-1.7446	4.79858	3.44558	0.063421	0.768688
Slc19a2	3.40037	2.19118	3.43392	0.0638703	0.768688
Lhpp	-4.6121	2.24979	3.43648	0.0637713	0.768688
Vrk3	1.49506	5.62055	3.46458	0.0626963	0.768688
Fstl1	7.40259	1.41327	3.45735	0.062971	0.768688
Kif4	4.37843	3.92818	3.43754	0.0637306	0.768688
Akap10	-1.89004	4.28836	3.4587	0.0629199	0.768688
Fhdc1	4.23956	3.6175	3.4293	0.0640491	0.768688
Ehd1	2.43515	6.24055	3.48154	0.0620571	0.768688
Timm29	-2.87911	3.75426	3.47199	0.0624162	0.768688
Hpgd	4.64919	3.58998	3.43193	0.0639474	0.768688
C1d	-1.58496	5.23501	3.44266	0.0635335	0.768688
Golph3	1.70616	5.46029	3.4756	0.0622801	0.768688
Suox	2.04901	3.8361	3.4272	0.0641307	0.768688
Snrnp25	3.44011	6.2978	3.47229	0.0624047	0.768688
Crtc2	3.87472	2.2718	3.46177	0.062803	0.768688
Pnpt1	-1.92716	5.10586	3.44692	0.0633699	0.768688
Cnp	-1.67317	7.13341	3.42499	0.0642166	0.768688
Slc25a47	15.2354	3.03163	3.4265	0.0641578	0.768688
Sh3d19	3.94126	3.94119	3.47228	0.0624054	0.768688
Bptf	-2.20312	4.94115	3.44687	0.0633715	0.768688
Hexb	-1.54744	7.06435	3.44396	0.0634836	0.768688
Depdc1b	5.58465	2.4527	3.42374	0.0642652	0.768688
Cp	9.76455	4.92607	3.44459	0.0634592	0.768688
Vbp1	2.2209	7.37618	3.43706	0.0637489	0.768688
Eif2ak4	2.13486	3.88724	3.42374	0.0642651	0.768688
Acvrl1	3.05668	3.22092	3.45304	0.0631354	0.768688
Itga9	7.17202	1.92386	3.41567	0.0645801	0.770956
Cd82	2.53785	7.3566	3.39839	0.0652602	0.772437
Tmem159	4.54733	2.05542	3.37867	0.0660455	0.772437
Hspa1a	7.33984	0.952703	3.40767	0.064894	0.772437
Ccp110	4.26246	2.72406	3.38227	0.065901	0.772437
Sin3b	1.88503	7.76226	3.40032	0.0651836	0.772437
Isoc1	-1.9271	4.92746	3.38564	0.0657667	0.772437
Zfp410	-2.51303	4.81539	3.37825	0.066062	0.772437
Selenot	2.27245	8.22079	3.37406	0.0662302	0.772437
Smad7	3.33565	1.89096	3.4009	0.065161	0.772437
Npepl1	-1.65395	4.73697	3.38685	0.0657182	0.772437
Ppox	2.29939	4.88618	3.38472	0.0658032	0.772437
Gm10925	2.54893	3.98407	3.37572	0.0661637	0.772437
Fbxo6	2.34699	4.52541	3.39698	0.0653157	0.772437
Ska3	-9.57108	1.06306	3.39007	0.0655903	0.772437
Aqp1	3.2703	5.75583	3.37501	0.0661923	0.772437
2008-03-01	3.44304	7.78335	3.39963	0.0652109	0.772437
Ctr9	-1.85223	4.93618	3.38683	0.0657193	0.772437
Gpam	5.61881	1.82806	3.37281	0.0662806	0.772437
0610012G03Rik	3.1245	3.71174	3.38883	0.0656396	0.772437
Wee1	4.64253	2.17268	3.38441	0.0658158	0.772437
St6galnac4	2.46991	4.09662	3.37614	0.0661469	0.772437
Smim20	1.86212	4.60009	3.39052	0.0655724	0.772437
Gigyf1	3.63288	1.97643	3.36602	0.0665544	0.773955
C1s1	8.46841	2.86852	3.36769	0.0664869	0.773955
Rnf115	2.42227	8.2631	3.35826	0.0668686	0.775152
Casp1	-1.57535	6.86625	3.35638	0.0669449	0.775152
Ccs	2.73612	5.56314	3.3573	0.0669076	0.775152
Ncl	-1.45524	6.88641	3.3592	0.0668306	0.775152
Chmp3	1.54679	7.10563	3.35176	0.0671332	0.775282
Lpl	-3.08931	5.0547	3.35228	0.0671122	0.775282
Tubgcp2	-1.92667	4.22813	3.35081	0.0671719	0.775282
Hexa	-1.40608	7.27503	3.34895	0.0672477	0.775326
Tank	1.50059	6.1404	3.32237	0.0683432	0.77578
Fggy	6.61796	1.82758	3.32176	0.0683686	0.77578
Upf3a	1.89094	4.70105	3.34371	0.0674624	0.77578
Madd	-1.69601	5.46586	3.28654	0.0698499	0.77578
Flad1	2.47198	4.48572	3.28589	0.0698775	0.77578
Serinc3	2.64	11.5442	3.322	0.0683587	0.77578
Tmem199	-2.41132	3.76985	3.34058	0.067591	0.77578
Rps2	1.88807	10.3033	3.31784	0.0685317	0.77578
Frmd8os	6.4253	1.59622	3.30498	0.0690702	0.77578
Terf2ip	-1.91478	4.5417	3.34616	0.0673618	0.77578
Wnk1	1.92617	7.69116	3.33151	0.0679644	0.77578
Jpt1	2.19265	8.17238	3.2997	0.0692927	0.77578
Ppip5k1	-4.08923	2.51663	3.29006	0.0697003	0.77578
Zfp830	-2.94721	3.6506	3.2847	0.0699285	0.77578
Gm10250	3.17535	2.27783	3.29631	0.0694357	0.77578
Erbb3	3.21038	2.50942	3.326	0.0681927	0.77578
Gtf2h5	1.90386	5.35081	3.2859	0.0698773	0.77578
Ikzf5	2.28433	4.24421	3.33264	0.0679176	0.77578
Txnrd3	4.67384	1.91049	3.28443	0.0699399	0.77578
Timm17a	1.62639	5.01846	3.2842	0.0699498	0.77578
Osbpl7	-6.77943	1.28019	3.34102	0.0675726	0.77578
Ppfibp1	3.75493	2.92926	3.28752	0.0698086	0.77578
Slc22a23	5.47478	2.87478	3.29737	0.0693907	0.77578
Metap2	2.33412	8.7208	3.31028	0.068848	0.77578
Mbtps2	-3.34144	3.04989	3.33665	0.0677524	0.77578
Atp5g1	1.83492	5.68761	3.30484	0.0690763	0.77578
Plk4	2.84306	3.75347	3.30852	0.0689216	0.77578
Trf	10.9201	5.09885	3.30936	0.0688865	0.77578
Ivd	2.2579	4.47976	3.30432	0.0690978	0.77578
Arhgap28	-5.52505	1.59241	3.32866	0.0680824	0.77578
Cdk1	4.80493	4.69297	3.30167	0.0692095	0.77578
Mphosph10	-1.78737	4.86031	3.2847	0.0699285	0.77578
Etv5	5.63018	1.77848	3.30095	0.06924	0.77578
Ndufa10	1.73334	6.32304	3.33609	0.0677755	0.77578
Jade1	-3.52028	3.37572	3.33309	0.0678994	0.77578
Heatr5a	-2.01561	4.08725	3.29345	0.0695567	0.77578
Map4k5	3.55099	6.41177	3.28895	0.0697477	0.77578
Tceal8	4.06948	5.06648	3.28027	0.0701174	0.77665
1700037H04Rik	3.45065	3.54861	3.2773	0.0702443	0.77665
Pemt	13.1103	2.6114	3.27888	0.070177	0.77665
Eif5a	1.537	8.07096	3.27166	0.0704864	0.778528
Dynll1	2.16967	8.35497	3.26593	0.0707328	0.779652
Med12	2.56377	4.36636	3.26691	0.0706905	0.779652
Mis18bp1	4.36511	2.80042	3.23154	0.0722327	0.781327
Hyal2	6.21279	1.35336	3.23626	0.0720248	0.781327
Slc39a9	-2.14801	4.02584	3.22292	0.0726141	0.781327
Cd200r3	-3.76461	2.27412	3.25369	0.071263	0.781327
Psma2	1.34119	7.75206	3.24447	0.0716649	0.781327
Ttc23	8.63216	1.1351	3.25399	0.0712496	0.781327
Fn3krp	2.61886	3.36927	3.22327	0.0725985	0.781327
Ap2s1	2.23366	4.78468	3.24732	0.0715403	0.781327
Rps15a.ps7	2.84335	1.99935	3.21833	0.0728179	0.781327
Swi5	1.36194	6.78772	3.21935	0.0727724	0.781327
Gcn1l1	2.73484	3.83719	3.22187	0.0726604	0.781327
Mst1r	-7.97589	1.12448	3.21643	0.0729026	0.781327
Dhx33	2.49479	3.46274	3.24887	0.0714726	0.781327
Mical3	3.42274	3.6183	3.25204	0.0713348	0.781327
Osbpl1a	4.41038	3.23126	3.24251	0.0717507	0.781327
Ankrd49	-2.28448	4.23408	3.23175	0.0722233	0.781327
Tdpx.ps1	5.28507	2.42159	3.22174	0.0726664	0.781327
Svbp	2.00995	5.34358	3.24614	0.071592	0.781327
4833413G10Rik	-4.04906	2.56685	3.22815	0.0723824	0.781327
Fzr1	3.29187	6.20843	3.24166	0.0717878	0.781327
Igkv3.12	-4.5888	1.35164	3.24406	0.071683	0.781327
Ptpa	2.31968	5.95921	3.22965	0.0723162	0.781327
Farp1	8.12437	1.0488	3.21617	0.0729142	0.781327
Gpr171	-1.59621	5.92416	3.23373	0.0721361	0.781327
A430033K04Rik	-6.58772	1.12758	3.21934	0.072773	0.781327
Coq9	2.38643	4.09952	3.22425	0.072555	0.781327
Slc30a7	-1.63487	5.03648	3.23981	0.071869	0.781327
Ccrl2	3.60761	4.45161	3.24409	0.0716813	0.781327
Osbpl8	1.92756	6.98284	3.2142	0.0730017	0.781488
Slc38a5	4.96888	5.101	3.20844	0.0732591	0.782468
Rel	-1.5451	5.12096	3.20925	0.0732229	0.782468
F11r	2.70365	3.74364	3.20728	0.0733111	0.782468
Dpm3	3.98821	2.61783	3.20365	0.073474	0.783432
Arhgef11	4.78246	1.78429	3.20181	0.0735569	0.783541
Eml5	3.47838	2.68448	3.20002	0.0736372	0.783622
BC003331	1.7623	4.76122	3.19091	0.0740486	0.784664
Extl2	-3.02854	2.40115	3.16332	0.07531	0.784664
Coasy	2.65877	3.53437	3.14944	0.075953	0.784664
Acbd6	-2.32826	3.51507	3.14251	0.0762762	0.784664
Ninj1	-2.4119	5.18496	3.15624	0.0756374	0.784664
Vrk2	1.85582	4.89736	3.13152	0.0767923	0.784664
Naf1	6.64726	1.40406	3.13886	0.076447	0.784664
Mob2	1.75421	6.09037	3.1363	0.0765672	0.784664
Ttc33	2.17724	6.45253	3.13514	0.0766217	0.784664
Lpin1	2.08383	4.2399	3.14193	0.0763033	0.784664
Slc16a10	3.68547	7.27088	3.17944	0.0745705	0.784664
Irgm2	-2.6818	5.17581	3.16919	0.0750398	0.784664
Rps21	1.75843	8.84386	3.13252	0.0767452	0.784664
1600014C10Rik	-1.38988	6.72047	3.14283	0.0762614	0.784664
Armc1	-1.36402	5.32511	3.18931	0.0741214	0.784664
Ndfip2	1.79884	4.92548	3.15332	0.0757726	0.784664
Zfp760	-2.82294	3.20656	3.15783	0.0755637	0.784664
Arl2	4.61208	2.05369	3.14272	0.0762663	0.784664
mt.Co1	2.71981	14.1113	3.13338	0.0767046	0.784664
Eral1	-2.86097	3.40418	3.18923	0.0741249	0.784664
Dnmt3b	3.57304	1.89315	3.16925	0.075037	0.784664
Ifrd2	3.40964	5.89308	3.16803	0.075093	0.784664
Zranb3	-4.06497	3.66531	3.14593	0.0761164	0.784664
Txndc9	1.30792	6.52266	3.13437	0.0766578	0.784664
H2.T24	-1.41332	6.77776	3.14779	0.0760297	0.784664
Oas3	2.37623	7.12369	3.17679	0.0746913	0.784664
Mzt1	2.38021	5.43701	3.14595	0.0761158	0.784664
1810055G02Rik	7.30414	1.26573	3.19289	0.0739591	0.784664
Csnk2a1	-1.22387	6.27278	3.17753	0.0746577	0.784664
Upk3b	8.0674	2.06656	3.16317	0.0753167	0.784664
Urod	3.99685	8.7663	3.15291	0.0757917	0.784664
Tlr7	-1.63568	5.86222	3.17873	0.0746027	0.784664
Got1	2.37128	4.44337	3.14504	0.0761581	0.784664
Pde12	-1.89404	4.44844	3.13507	0.076625	0.784664
Hras	2.46703	4.334	3.13921	0.0764309	0.784664
Slc7a2	8.60647	2.21465	3.1681	0.0750896	0.784664
AW554918	-5.33382	1.45949	3.16094	0.0754198	0.784664
Ifit1bl2	2.89777	4.34606	3.14425	0.0761949	0.784664
Fastkd5	3.87218	2.65837	3.14819	0.0760111	0.784664
Arrb1	2.36591	7.74482	3.15126	0.0758682	0.784664
Gch1	2.42827	4.71599	3.16535	0.0752165	0.784664
Dok4	4.94245	1.2703	3.14714	0.0760603	0.784664
Ppp1r9b	-2.37166	4.12996	3.12901	0.0769106	0.785129
Gpcpd1	2.12668	8.29641	3.12	0.0773368	0.78576
Nsmce3	-3.23725	2.82787	3.12427	0.0771344	0.78576
Tmbim4	1.66484	5.65364	3.12606	0.0770499	0.78576
Dennd2c	3.19626	3.52354	3.1216	0.0772609	0.78576
Kansl1	-2.85257	2.72236	3.12104	0.0772873	0.78576
po6	3.17396	2.66039	3.11615	0.0775199	0.785921
Prom1	8.57304	0.532616	3.07558	0.0794762	0.785921
Actl6a	-1.66678	5.64229	3.07226	0.0796385	0.785921
2600006K01Rik	6.07523	2.40107	3.10831	0.0778937	0.785921
Cops7b	-3.3583	2.24691	3.05911	0.0802854	0.785921
Nom1	-1.52275	4.6401	3.03608	0.0814325	0.785921
Cand1	-1.34704	5.98647	3.06494	0.0799981	0.785921
Add1	2.01594	4.78215	3.00716	0.0828973	0.785921
Mtrf1	-4.19626	2.13932	3.05615	0.0804322	0.785921
1810014B01Rik	-4.19515	1.82752	3.00596	0.082959	0.785921
Pes1	-1.57211	6.01646	3.05273	0.0806014	0.785921
Zc3h4	-1.54793	4.0949	3.011	0.0827014	0.785921
4833420G17Rik	1.41855	6.63204	3.04628	0.0809221	0.785921
Hmg20a	-1.87069	4.69065	3.05817	0.0803319	0.785921
Rdh7	21.0083	4.03018	3.01355	0.0825711	0.785921
Rpl27	1.41548	8.4984	3.03214	0.0816305	0.785921
Ankrd26	-4.06761	2.08448	3.05583	0.0804478	0.785921
Med8	-1.62972	5.46925	3.06475	0.0800075	0.785921
Kpna1	1.9753	6.80288	3.01952	0.0822679	0.785921
Ranbp10	3.8974	8.71195	3.00707	0.0829018	0.785921
Angel2	-1.33746	5.66274	3.00905	0.0828008	0.785921
Nr1h3	4.90464	4.3033	3.03196	0.0816393	0.785921
Txnrd1	-2.4642	3.68733	3.05495	0.0804913	0.785921
po7	4.0607	9.81582	3.00925	0.0827906	0.785921
Mrpl52	3.24296	3.45136	3.02457	0.082012	0.785921
Ldlrad3	-3.75959	3.3394	3.03165	0.0816551	0.785921
Ubl4a	1.87063	5.33388	3.10565	0.0780211	0.785921
Endod1	1.86523	5.2493	3.05639	0.0804201	0.785921
Pdlim7	-3.24148	3.65711	3.04636	0.0809182	0.785921
Rest	-2.09154	4.43714	3.04541	0.0809656	0.785921
Plpp5	4.195	2.69166	3.01352	0.082573	0.785921
Igfbp7	6.19921	2.7491	3.06268	0.0801094	0.785921
Tet1	-5.61894	1.76099	3.09333	0.0786136	0.785921
Ifi209	-1.51947	8.77783	3.01675	0.0824085	0.785921
Fgfbp3	9.21132	1.62222	3.09398	0.0785823	0.785921
Cope	2.08174	5.96817	3.01731	0.0823803	0.785921
Atxn1l	-2.30138	3.83225	3.0684	0.0798282	0.785921
Acadsb	2.39142	4.88725	3.10991	0.0778171	0.785921
Pitpnb	4.29777	2.59087	3.05737	0.0803717	0.785921
Neurl4	-2.10451	4.36347	3.03503	0.081485	0.785921
Cacna1e	-2.16901	4.18459	3.06697	0.0798984	0.785921
pc	1.64921	4.71541	3.00528	0.0829936	0.785921
Ube2e3	2.97888	6.86905	3.10018	0.0782835	0.785921
Otub2	2.42256	4.40772	3.11775	0.0774437	0.785921
Lta	-4.42063	1.62557	3.09995	0.0782946	0.785921
Kcnj5	-4.68357	2.01593	3.0918	0.0786876	0.785921
Tmed7	-1.41946	6.22478	3.00439	0.0830393	0.785921
Snx33	3.48001	2.14289	3.0827	0.0791291	0.785921
Uqcrc2	1.57868	8.21665	3.00471	0.0830228	0.785921
Ccdc77	2.03583	4.3451	3.05702	0.0803892	0.785921
Gm15501	2.77839	2.00539	3.03771	0.0813507	0.785921
Gpt2	9.52269	1.73436	3.09748	0.0784137	0.785921
Rabif	2.15349	4.53419	3.04221	0.0811253	0.785921
Adap1	-2.52802	4.1463	3.07852	0.0793325	0.785921
Rbm47	4.43901	1.48121	3.01553	0.0824704	0.785921
Pknox1	-1.50059	5.13524	3.0606	0.0802119	0.785921
Bhmt	22.719	4.99464	3.05325	0.0805756	0.785921
Gm19261	-5.90869	1.70695	3.11189	0.0777228	0.785921
AI847159	-5.92892	1.17857	3.08167	0.0791792	0.785921
Guk1	1.93171	4.32498	3.05212	0.0806319	0.785921
Rpl34.ps1	2.60829	2.19474	3.11299	0.0776702	0.785921
Hmbox1	4.93716	2.10799	3.08942	0.0788029	0.785921
Trbv1	-3.74483	2.74752	3.10557	0.0780251	0.785921
Aars	1.76059	5.97958	3.01138	0.082682	0.785921
Eif2ak2	-1.60663	5.68043	3.05937	0.080273	0.785921
Gm5150	-1.58938	4.69787	3.09213	0.0786716	0.785921
Slc6a19	5.40695	2.42177	3.0951	0.0785283	0.785921
Prcp	-1.56779	5.69712	3.03911	0.0812805	0.785921
Vps16	-1.47795	5.81747	3.09658	0.0784569	0.785921
Ubr2	1.63191	4.65934	3.03	0.0817378	0.785921
H2.Eb2	-3.1078	4.18098	3.10032	0.078277	0.785921
Dcp1b	-2.14671	3.30628	3.07432	0.079538	0.785921
Atp5f1	1.43134	8.13978	3.02109	0.0821882	0.785921
Ccdc163	-4.31535	2.55435	3.06575	0.0799581	0.785921
Armcx2	-3.43093	2.72937	3.02552	0.0819641	0.785921
Patj	-3.43725	3.40169	3.01559	0.0824674	0.785921
Snx13	1.8546	4.59053	3.00632	0.0829403	0.785921
Sh3pxd2b	7.58381	1.26203	3.03329	0.0815723	0.785921
Snhg8	2.46462	2.93702	3.0022	0.0831514	0.786291
Acp2	-1.5555	5.09537	2.99333	0.0836083	0.78856
Gstk1	4.68693	2.83746	2.98109	0.0842426	0.78856
Ifi206	-1.61413	6.38948	2.98896	0.0838342	0.78856
Dglucy	-2.81683	3.1973	2.98535	0.0840212	0.78856
Oas1b	2.34826	3.75295	2.97917	0.0843423	0.78856
Cdk5r1	-5.23904	0.837866	2.98296	0.0841453	0.78856
Trnt1	-1.65194	5.26707	2.98464	0.0840577	0.78856
Znhit2	4.71483	2.00255	2.99035	0.0837621	0.78856
Neil3	-5.60832	2.54911	2.98602	0.0839863	0.78856
Usp20	3.12522	2.32814	2.98994	0.0837832	0.78856
Tarsl2	3.66042	2.33345	2.99421	0.0835627	0.78856
Mllt3	2.64403	7.69226	2.97944	0.0843284	0.78856
Fbxo25	-2.28583	3.64965	2.98679	0.0839462	0.78856
Prokr1	4.54806	3.47739	2.97763	0.0844231	0.788631
Brix1	-2.12009	4.36979	2.96797	0.0849283	0.791943
Mpeg1	-1.4345	8.73793	2.96665	0.0849979	0.791943
Tpsb2	6.52081	2.02914	2.96711	0.0849734	0.791943
Uhrf1bp1l	1.72904	5.33417	2.96304	0.0851875	0.793024
Rpl29	2.22987	8.39451	2.96025	0.0853345	0.793706
Tpgs2	-2.199	3.8325	2.93313	0.0867788	0.793933
Apoh	14.7216	4.93	2.93694	0.0865748	0.793933
Bend5	2.93054	2.94981	2.92894	0.0870045	0.793933
Dcaf6	3.73146	7.48412	2.92917	0.0869924	0.793933
Tgif1	-1.48263	4.97517	2.93282	0.0867956	0.793933
Cdc37l1	1.85491	4.81722	2.95138	0.0858043	0.793933
Cenpe	-4.83951	3.94519	2.94669	0.0860536	0.793933
Gid4	-1.85775	4.02975	2.93903	0.0864626	0.793933
Cycs	1.42743	6.34778	2.95655	0.0855304	0.793933
Zfp945	1.78736	5.00922	2.92619	0.0871529	0.793933
Mt2	7.0076	0.193969	2.92541	0.0871951	0.793933
Nars	2.0786	8.20042	2.93528	0.0866635	0.793933
Bag3	3.18013	2.50805	2.93174	0.0868536	0.793933
Sfxn5	-2.18644	4.361	2.94774	0.0859977	0.793933
Atg12	1.96123	6.94628	2.94169	0.0863206	0.793933
Oip5	2.77234	3.9657	2.92981	0.0869578	0.793933
Ampd3	-3.89362	2.77202	2.93101	0.0868933	0.793933
Mex3b	7.7424	1.05836	2.94968	0.0858946	0.793933
Coprs	-5.84735	1.04598	2.94235	0.086285	0.793933
Nsl1	3.60375	2.38244	2.93548	0.0866531	0.793933
Slc44a1	-2.25634	6.59843	2.92843	0.0870319	0.793933
Dcun1d2	2.20119	4.02664	2.94402	0.0861959	0.793933
Il5ra	-2.19789	4.18102	2.92571	0.0871791	0.793933
Rassf7	3.72021	2.01092	2.92532	0.0872001	0.793933
2210406H18Rik	-4.78642	2.2249	2.95068	0.0858415	0.793933
Cct7	1.74905	8.35848	2.92135	0.0874145	0.794437
Rnf217	6.28778	1.76556	2.91986	0.0874954	0.794437
Ssr1	-1.39891	5.7509	2.92201	0.0873789	0.794437
Zfp626	-3.00379	3.99044	2.91885	0.0875502	0.794437
Atp7a	6.64898	1.70827	2.91589	0.0877111	0.794559
Spns2	-6.06062	1.21895	2.91664	0.0876701	0.794559
Rab9	-2.15223	3.93708	2.91197	0.0879245	0.79527
Prpf18	1.76826	6.98006	2.91174	0.087937	0.79527
Vars	-1.67449	5.54404	2.90478	0.0883174	0.796705
Phf11a	-2.69343	5.33059	2.90608	0.0882461	0.796705
Naip2	-1.52724	6.04774	2.90549	0.0882786	0.796705
Gm12276	-5.25064	0.995303	2.89752	0.0887159	0.796965
Mfap3l	-3.86498	5.23579	2.89863	0.0886549	0.796965
Spcs3	-1.20239	6.40892	2.89933	0.0886163	0.796965
Iqgap2	-1.61015	5.74555	2.9027	0.0884311	0.796965
Fmnl1	-2.45841	3.03063	2.89917	0.088625	0.796965
Ino80d	1.9271	4.52008	2.89315	0.0889568	0.797366
Arih2	1.66392	6.73172	2.89089	0.0890817	0.797366
Snrnp27	1.78453	5.91044	2.89045	0.0891061	0.797366
Rpl21	1.68433	10.7949	2.88478	0.08942	0.797366
Rpa2	1.84421	5.53717	2.88467	0.0894264	0.797366
Dock5	1.95534	4.04339	2.89287	0.0889722	0.797366
Ramp3	-5.86587	0.852613	2.88723	0.0892841	0.797366
Lrrc32	5.79041	0.931401	2.88663	0.0893175	0.797366
Rnf216	-2.96037	3.04212	2.88924	0.0891729	0.797366
Camk1d	1.70132	4.67374	2.86227	0.0906792	0.797721
Rab5b	-1.45103	4.77059	2.86778	0.0903697	0.797721
Slc37a1	3.19624	2.62325	2.875	0.0899651	0.797721
Fgd3	-1.92153	5.77701	2.87567	0.0899275	0.797721
Pank2	1.40001	5.14537	2.86432	0.0905641	0.797721
Sms	-1.67248	5.19302	2.88078	0.0896426	0.797721
Nipa1	5.11003	4.53292	2.86781	0.0903677	0.797721
Ssbp1	-1.75554	4.32367	2.87367	0.0900394	0.797721
Kyat3	6.78062	2.55004	2.86904	0.090299	0.797721
Galnt10	2.04229	5.17384	2.87955	0.0897112	0.797721
Mns1	2.96199	3.52682	2.8714	0.0901665	0.797721
Trim13	5.93113	1.72631	2.86174	0.0907094	0.797721
Hmox1	2.97993	4.88702	2.87275	0.0900909	0.797721
Rps6ka5	-2.97939	3.30364	2.86311	0.0906322	0.797721
E2f2	3.21527	9.37355	2.86943	0.0902769	0.797721
Atp6v1e1	1.4084	7.19445	2.86148	0.0907242	0.797721
Grcc10	3.80489	1.67706	2.86308	0.090634	0.797721
Aig1	-2.64215	3.29425	2.85488	0.0910972	0.800349
Ncr1	-3.45597	5.45337	2.84318	0.0917622	0.800466
Ido1	7.19526	0.323576	2.83248	0.0923758	0.800466
1110002L01Rik	-2.40047	3.43155	2.83225	0.0923887	0.800466
Cdca8	3.69502	3.47997	2.83313	0.0923382	0.800466
Ndufv3	1.78118	5.70515	2.82995	0.0925214	0.800466
Tnpo1	1.44856	6.79601	2.83798	0.0920599	0.800466
Trim30a	-1.48447	8.19176	2.8423	0.0918127	0.800466
Elp5	1.61683	5.61607	2.83752	0.0920861	0.800466
G430095P16Rik	3.53802	2.073	2.84377	0.0917288	0.800466
Slc17a5	2.9604	2.9483	2.83926	0.0919863	0.800466
Dctpp1	2.08556	4.12903	2.83842	0.0920348	0.800466
Gm15922	3.95304	2.86216	2.83682	0.0921263	0.800466
Zfp141	-2.56326	3.85588	2.83097	0.0924622	0.800466
Anp32e	2.20804	7.0375	2.83295	0.0923487	0.800466
Usf3	1.96734	4.85065	2.84554	0.0916279	0.800466
Fam173b	2.93116	3.10225	2.85049	0.091346	0.800466
Phf8	2.22456	5.16865	2.83656	0.0921413	0.800466
Stat2	-1.77175	6.08006	2.83701	0.0921155	0.800466
Traip	2.06376	4.09509	2.83031	0.0925007	0.800466
Cnep1r1	-2.17741	4.15526	2.82385	0.0928733	0.801581
Oxct1	-1.62022	5.85474	2.82599	0.0927498	0.801581
Gm16124	2.75519	2.66634	2.825	0.0928067	0.801581
Sp140	-1.38055	7.54665	2.82228	0.0929641	0.801722
Mogs	-2.26309	5.02529	2.81811	0.0932062	0.801886
Srp19	-2.47054	4.185	2.8188	0.0931663	0.801886
Ccdc138	5.06093	1.60452	2.81856	0.09318	0.801886
Ap3s1	1.9407	6.13254	2.81548	0.0933589	0.802278
Trmt12	-2.17109	3.04134	2.81476	0.0934007	0.802278
Casp8	-1.55041	7.12394	2.81304	0.0935009	0.8025
Rpl37	1.67251	9.29172	2.81028	0.0936622	0.803245
mt.Nd2	2.44717	6.52763	2.8083	0.0937777	0.803359
Dgke	-2.66228	3.76046	2.80623	0.0938991	0.803359
Ctsb	2.29102	8.58481	2.80694	0.0938571	0.803359
6530402F18Rik	2.71345	3.42768	2.80186	0.0941548	0.804908
Arhgef6	-1.39659	5.97975	2.79727	0.0944251	0.80594
Tbc1d13	-1.69871	4.91641	2.79839	0.0943589	0.80594
Bccip	-1.37291	5.15315	2.77148	0.0959576	0.806086
Rasal1	-4.11402	1.3031	2.78947	0.0948855	0.806086
Slc29a1	2.99974	4.00915	2.77586	0.0956951	0.806086
Csrp2	4.07253	3.15411	2.77542	0.0957215	0.806086
Trmt10c	-2.34947	4.24097	2.78409	0.0952047	0.806086
Tmem221	-4.3215	1.92788	2.79197	0.0947376	0.806086
Trappc2	-2.54845	4.27974	2.77097	0.0959881	0.806086
Parp2	-1.61874	5.13595	2.77567	0.0957067	0.806086
Gm6545	-4.21065	2.62155	2.77916	0.0954981	0.806086
Ptgir	-3.47112	2.71498	2.783	0.0952693	0.806086
Gm10603	4.93211	2.93494	2.77056	0.0960125	0.806086
Mtg1	-3.51738	2.7791	2.77345	0.0958396	0.806086
Snapin	1.5662	5.01468	2.78024	0.0954336	0.806086
Pla2g12a	2.87126	5.942	2.78271	0.095287	0.806086
Dctn5	-1.40573	5.82045	2.78579	0.0951035	0.806086
Ahsa1	1.72869	7.96669	2.77638	0.0956639	0.806086
Trp53	3.61267	1.68563	2.79023	0.0948406	0.806086
Chd1l	-1.58095	4.51765	2.78146	0.0953613	0.806086
Oasl1	-3.16376	5.15702	2.79481	0.0945701	0.806086
Bpnt1	2.13554	3.50719	2.79207	0.0947317	0.806086
Itfg1	-1.23654	6.0543	2.7752	0.0957347	0.806086
Gbp6	-1.64763	5.47325	2.76923	0.0960922	0.806128
Asf1b	2.46429	3.75658	2.76662	0.0962495	0.806819
Rnf4	-1.12525	6.43547	2.76438	0.0963841	0.80732
Stoml1	-1.92937	4.58672	2.75486	0.0969593	0.808555
Ddx18	-2.11235	3.46035	2.75662	0.0968524	0.808555
Slc25a26	3.93649	1.59789	2.7597	0.0966664	0.808555
Gm12918	2.98423	2.30141	2.75802	0.0967677	0.808555
Gak	1.30124	5.062	2.75449	0.0969816	0.808555
Tomm34	-1.42003	4.94922	2.75828	0.0967524	0.808555
Kcmf1	1.49057	6.05274	2.73747	0.0980198	0.813243
Atp6v0a1	3.44982	4.29015	2.74254	0.0977094	0.813243
Ahi1	2.75597	2.90055	2.73431	0.098214	0.813243
Ehd3	1.48248	4.54283	2.7415	0.0977729	0.813243
Foxd2os	-4.577	1.41397	2.73416	0.0982229	0.813243
Adtrp	9.84923	0.887234	2.73466	0.0981922	0.813243
Thumpd3	-1.36288	5.38787	2.73687	0.0980569	0.813243
Taf8	1.8448	3.95051	2.73554	0.0981381	0.813243
Srp14	1.3813	7.18977	2.74299	0.0976818	0.813243
Mapre2	2.07593	5.79328	2.70311	0.100152	0.813302
Atrn	2.01357	4.09263	2.69405	0.100724	0.813302
Abhd4	2.50278	6.65314	2.70497	0.100036	0.813302
Elob	3.22362	8.87484	2.69343	0.100763	0.813302
Sqstm1	2.12871	9.03145	2.70955	0.0997488	0.813302
Map4k3	2.82388	3.1646	2.7301	0.0984732	0.813302
Parvg	-2.27904	3.83236	2.67736	0.101784	0.813302
Trak2	3.12	8.23053	2.7253	0.0987694	0.813302
Srf	-1.96324	3.74756	2.67929	0.101661	0.813302
Cers6	-1.27693	6.13782	2.67716	0.101797	0.813302
Hipk1	2.28023	8.19277	2.68974	0.100996	0.813302
Dmap1	-1.90208	3.74269	2.69161	0.100878	0.813302
Ndufb6	1.89417	5.3194	2.70969	0.0997402	0.813302
Cd4	-2.11202	5.57397	2.70489	0.100041	0.813302
Zdhhc24	-2.74678	2.88096	2.68232	0.101468	0.813302
A230059L01Rik	-4.75987	2.5954	2.69023	0.100965	0.813302
Ambp	20.2605	4.92323	2.68927	0.101026	0.813302
Ints3	-2.15424	3.50906	2.70275	0.100175	0.813302
Rpl35a.ps2	3.68132	1.95054	2.69071	0.100935	0.813302
Gm10419	-4.88136	2.22586	2.68728	0.101153	0.813302
Trbv19	-2.56246	3.6648	2.70052	0.100316	0.813302
Pex19	1.49043	5.73222	2.6926	0.100815	0.813302
mt.Nd5	2.54877	6.30244	2.69319	0.100778	0.813302
Arl4a	2.48852	6.80872	2.68339	0.1014	0.813302
Sirt2	1.53505	4.87806	2.71548	0.0993788	0.813302
Brcc3	-1.47032	5.77874	2.7034	0.100135	0.813302
Stx8	-1.61744	5.10827	2.71886	0.0991688	0.813302
Zbtb41	-2.9075	3.62306	2.68791	0.101112	0.813302
Gripap1	-1.6515	5.1481	2.70417	0.100086	0.813302
Samd4	4.3038	2.82896	2.67513	0.101927	0.813302
Med31	3.19323	2.14294	2.69147	0.100886	0.813302
Tgtp1	-1.74124	7.31153	2.73022	0.0984655	0.813302
Mbd4	-2.30333	3.61027	2.67605	0.101868	0.813302
Mllt6	-1.53876	5.51943	2.71696	0.0992873	0.813302
BE692007	-1.81063	4.20425	2.68671	0.101189	0.813302
Sgsh	-3.56409	2.51329	2.67537	0.101912	0.813302
E130308A19Rik	4.31681	1.92284	2.72744	0.0986371	0.813302
Hsdl1	-1.47542	5.2453	2.72737	0.0986415	0.813302
Ccr3	-3.13477	4.46288	2.6812	0.101539	0.813302
Tceal9	2.47438	3.66695	2.68022	0.101602	0.813302
Gm45222	4.27044	2.50629	2.6861	0.101227	0.813302
Tnfaip8	-1.18162	6.4605	2.68355	0.101389	0.813302
Eri2	3.20407	2.8464	2.67902	0.101678	0.813302
Reln	4.2467	3.69098	2.67943	0.101652	0.813302
Acp1	2.48871	7.45767	2.70552	0.100001	0.813302
Mrps24	1.47632	4.73024	2.72222	0.0989603	0.813302
Cdo1	14.2539	4.13848	2.70412	0.100089	0.813302
Gorasp1	-3.46954	1.86161	2.70225	0.100207	0.813302
H2afv	1.39975	4.84004	2.69201	0.100852	0.813302
Smtnl1	4.83857	2.39277	2.67324	0.102048	0.813668
Sh3tc1	-2.65567	3.55728	2.66981	0.102268	0.814686
Fmr1	1.53619	5.11445	2.6689	0.102327	0.814686
Vps13b	1.43166	5.34876	2.66538	0.102553	0.815884
Mthfd2	3.05989	7.59945	2.66349	0.102676	0.816255
Gm11613	-4.60543	1.30698	2.65626	0.103143	0.816499
Atf2	1.64157	5.19267	2.65395	0.103293	0.816499
Fmnl2	7.43445	1.97833	2.65187	0.103428	0.816499
Mitd1	-1.54786	5.19266	2.65042	0.103523	0.816499
Dusp19	-5.56548	1.6828	2.65016	0.103539	0.816499
Tmcc2	4.98757	8.76608	2.65993	0.102906	0.816499
Ttc1	-1.50493	5.0318	2.65872	0.102984	0.816499
Dhx9	-2.21863	3.70116	2.65601	0.103159	0.816499
Uqcrb	1.62794	6.93946	2.65065	0.103507	0.816499
Sdc1	5.33119	2.38572	2.65156	0.103449	0.816499
Trim3	4.46032	1.6087	2.65737	0.103071	0.816499
Acss1	-1.3386	5.85153	2.6469	0.103752	0.816571
Retsat	5.2358	2.80626	2.64075	0.104155	0.816571
Eif2ak1	2.60688	6.38187	2.64435	0.103919	0.816571
Mia2	-1.81346	4.15738	2.64169	0.104093	0.816571
Asb7	2.64016	3.23324	2.64399	0.103942	0.816571
9530026F06Rik	-6.6972	2.09537	2.64201	0.104072	0.816571
Gm10033	-4.41481	2.47744	2.6425	0.104039	0.816571
Pcdh7	5.78421	1.75016	2.64165	0.104095	0.816571
Cox6a1	2.65204	8.58373	2.63764	0.104358	0.817574
Col1a2	11.0332	0.782444	2.63157	0.104758	0.817992
Tlr3	-4.16685	1.66911	2.62761	0.10502	0.817992
Hal	7.04714	3.42332	2.62587	0.105135	0.817992
Haus7	-2.7968	2.79558	2.62959	0.104889	0.817992
Llgl1	-2.44591	3.41073	2.6327	0.104684	0.817992
Blmh	-1.36854	5.86431	2.63443	0.10457	0.817992
Ticam2	-3.63801	1.69427	2.62838	0.104969	0.817992
Ythdf2	-1.44597	5.32383	2.62533	0.10517	0.817992
Rbpj	-2.1592	3.82712	2.63022	0.104847	0.817992
Ube2q2	-1.76431	4.41949	2.63424	0.104582	0.817992
Srgap3	-5.17127	1.44781	2.62044	0.105495	0.819927
Dhrs1	1.70386	5.03008	2.61052	0.106157	0.820474
2610021A01Rik	2.64877	3.13543	2.60862	0.106284	0.820474
Ciapin1	-2.0254	4.02647	2.61417	0.105913	0.820474
Btaf1	1.41377	5.76268	2.60712	0.106385	0.820474
Cops2	2.06853	7.40041	2.60685	0.106403	0.820474
Gm5970	3.96811	0.552571	2.60855	0.106289	0.820474
Gfi1b	-5.2466	1.43631	2.61116	0.106114	0.820474
Rps26	1.83073	7.73476	2.61563	0.105815	0.820474
Eed	-1.88051	5.28576	2.61445	0.105894	0.820474
Rasgrp4	-3.70214	2.79176	2.61039	0.106165	0.820474
2310034O05Rik	-5.92345	1.01757	2.60772	0.106345	0.820474
Ift122	5.05489	0.894448	2.58815	0.107666	0.820797
Znrf3	4.21253	1.79244	2.58343	0.107987	0.820797
Zfp113	2.85574	2.72056	2.59047	0.107508	0.820797
Rnmt	1.65373	5.61247	2.602	0.106729	0.820797
Ankrd36	7.70607	4.33937	2.58425	0.107931	0.820797
C130026I21Rik	-2.83594	3.65745	2.59058	0.107501	0.820797
AI506816	1.87311	4.20193	2.58996	0.107543	0.820797
Ctbp2	5.39928	1.80439	2.59936	0.106907	0.820797
Mtmr10	-2.64981	3.62293	2.59003	0.107538	0.820797
Platr25	-2.52175	3.42163	2.58386	0.107958	0.820797
Mut	-1.97506	4.00853	2.6028	0.106675	0.820797
Atp5h	2.05198	9.49796	2.59635	0.10711	0.820797
Hibadh	1.76414	5.82109	2.58286	0.108026	0.820797
Gbe1	1.92919	4.19691	2.59017	0.107529	0.820797
Rplp2	2.66871	8.01704	2.59769	0.107019	0.820797
Pfkp	-1.57118	7.04133	2.58261	0.108044	0.820797
2001-09-01	1.92881	6.15486	2.60297	0.106664	0.820797
Khdc1a	5.71858	1.11105	2.58546	0.107849	0.820797
Uox	22.3835	4.26394	2.58716	0.107733	0.820797
Slc15a3	-2.13184	4.55046	2.58937	0.107583	0.820797
Fam151b	-4.65749	1.99434	2.5954	0.107174	0.820797
Rev3l	-2.20085	4.94605	2.57935	0.108266	0.821611
Smcr8	-1.34521	4.98684	2.57815	0.108348	0.821611
Tor1aip2	1.46613	6.35581	2.57769	0.108379	0.821611
Syvn1	3.40135	2.26447	2.57608	0.10849	0.821872
Klhl18	-2.18042	3.07721	2.57428	0.108614	0.821984
Rpp25l	2.7046	3.01814	2.57364	0.108657	0.821984
Psenen	1.50858	6.20627	2.57083	0.108851	0.822868
Fmnl3	-3.42476	2.92778	2.56036	0.109574	0.82362
Cdk16	1.77487	4.19158	2.54583	0.110586	0.82362
Atp5s	3.98457	2.3881	2.55485	0.109956	0.82362
Mmd	-3.11158	7.96763	2.5561	0.109869	0.82362
Cyp3a11	20.9801	3.67343	2.55077	0.11024	0.82362
Sp100	-1.31427	8.01192	2.54579	0.110589	0.82362
Gabpb1	-2.26675	3.6718	2.55206	0.110151	0.82362
Rnf2	-1.5753	5.31652	2.56178	0.109475	0.82362
Dennd5b	-2.44182	3.55005	2.5423	0.110833	0.82362
Mgat4b	4.49784	2.85616	2.55474	0.109964	0.82362
Anapc4	-1.19693	5.25628	2.56526	0.109235	0.82362
Rmi1	2.01458	3.96459	2.55638	0.10985	0.82362
Gale	3.41234	2.95983	2.55514	0.109936	0.82362
Dpy19l1	-1.5847	5.21027	2.55216	0.110144	0.82362
Trim30b	-2.36343	6.80184	2.56093	0.109534	0.82362
Tubb4b	1.51892	7.94325	2.5454	0.110616	0.82362
Lrrn3	-4.21535	5.6459	2.55651	0.109841	0.82362
Rsad1	-5.31066	1.42209	2.54357	0.110744	0.82362
Ptpro	-1.58135	5.37581	2.54192	0.11086	0.82362
Mettl3	-1.42659	4.7506	2.5445	0.110679	0.82362
Ighv5.17	-4.7429	1.99562	2.56297	0.109393	0.82362
Bcl2a1a	2.53867	3.72189	2.54326	0.110766	0.82362
Fgfr1op2	2.62009	9.5297	2.55523	0.10993	0.82362
Gm4129	5.98794	2.80741	2.54471	0.110664	0.82362
Pcif1	-1.59097	3.95839	2.54632	0.110551	0.82362
Mrpl36	1.37863	4.68636	2.53973	0.111014	0.824193
Snhg6	2.13255	3.86579	2.52858	0.111801	0.824577
Bak1	-2.04476	5.16564	2.52646	0.111951	0.824577
Ech1	1.60185	6.46469	2.52589	0.111991	0.824577
Vnn1	16.5091	1.43958	2.5344	0.11139	0.824577
Spint1	5.98392	0.78129	2.52667	0.111937	0.824577
Hmbs	3.24342	8.81491	2.529	0.111771	0.824577
Fanci	-3.57541	3.03681	2.52493	0.11206	0.824577
Ralb	-1.9687	4.81136	2.52953	0.111733	0.824577
Jrkl	-4.54378	2.95783	2.53655	0.111238	0.824577
Vamp1	-2.69613	3.97972	2.53603	0.111274	0.824577
Ostc	-1.29673	6.23285	2.52685	0.111924	0.824577
Itpr3	-1.51791	4.43993	2.52552	0.112018	0.824577
Dnaja4	3.07391	7.12744	2.52795	0.111845	0.824577
Mlh3	-3.34621	2.61717	2.5223	0.112247	0.824907
Sec23a	2.43769	6.30015	2.52	0.112411	0.824907
Rnf168	1.77546	4.54603	2.52014	0.112401	0.824907
Ncaph	-4.31775	4.08093	2.5209	0.112346	0.824907
Txndc12	-1.52812	4.08526	2.51864	0.112508	0.825057
Smim26	3.86187	2.24548	2.51421	0.112824	0.82569
Tmco3	1.87084	3.23337	2.51528	0.112748	0.82569
Itpr2	-1.55619	6.07815	2.51459	0.112797	0.82569
Tmed5	-1.24219	5.83599	2.50987	0.113135	0.827406
Ost4	2.38014	8.52978	2.50773	0.113289	0.827608
Apex2	3.12696	1.83019	2.50735	0.113316	0.827608
Prdx3	1.69024	7.18218	2.50519	0.113471	0.82762
Snx22	6.69666	3.97905	2.50571	0.113434	0.82762
Rad54l	6.3062	2.16863	2.50365	0.113583	0.827871
Rpl34	1.46765	9.54212	2.50068	0.113797	0.828872
Ap5z1	3.54032	2.39946	2.49898	0.11392	0.829211
Ccdc51	-2.69445	2.6928	2.495	0.114208	0.829628
Nsf	-1.25029	5.52034	2.49504	0.114206	0.829628
Akt1s1	3.38165	2.5344	2.49688	0.114072	0.829628
Lamc1	2.28605	2.80938	2.47547	0.115635	0.829862
Tex9	-3.58453	2.79476	2.48066	0.115254	0.829862
Il9r	-3.00467	3.14636	2.47667	0.115547	0.829862
Kif3a	2.96787	2.77691	2.47167	0.115914	0.829862
Glo1	3.23689	8.53442	2.46961	0.116067	0.829862
Eef1akmt2	2.28944	3.43655	2.4764	0.115567	0.829862
Saa3	5.66229	8.72015	2.48681	0.114804	0.829862
Acss2	1.59964	5.45353	2.47649	0.11556	0.829862
Pbdc1	1.36401	4.97451	2.48113	0.115219	0.829862
Gpn2	3.65574	2.72913	2.48425	0.114991	0.829862
Vcam1	7.07126	1.67515	2.46932	0.116088	0.829862
Stag1	-1.39261	5.81375	2.48265	0.115108	0.829862
H3f3a.ps2	2.65894	3.21145	2.48359	0.115039	0.829862
Ttc30b	4.44002	2.08176	2.4762	0.115581	0.829862
Elac1	-2.7381	3.41143	2.47378	0.115759	0.829862
Uggt1	-1.26181	5.50524	2.47194	0.115895	0.829862
Ap5s1	2.16279	3.18175	2.48493	0.114942	0.829862
Tmem185b	2.03591	3.75	2.47105	0.115961	0.829862
Gins3	-2.17917	3.12042	2.48924	0.114627	0.829862
Polr2l	3.8079	2.19684	2.48586	0.114873	0.829862
Glul	2.39705	9.34884	2.48174	0.115175	0.829862
Rpl39	1.74794	10.568	2.48345	0.115049	0.829862
Cstf2t	-1.70798	5.01775	2.49098	0.114501	0.829862
Pdlim4	-3.80838	1.74656	2.47203	0.115888	0.829862
Lcor	2.6024	3.98925	2.46463	0.116435	0.830141
Plekhb2	-1.81352	5.1455	2.4677	0.116208	0.830141
Il3ra	-5.32442	1.01274	2.46494	0.116412	0.830141
Gm49331	4.66941	1.72428	2.46664	0.116286	0.830141
Kdm7a	1.99287	7.32699	2.46219	0.116616	0.830183
Ighg2c	6.4395	5.60249	2.46061	0.116733	0.830183
Cldn10	4.48517	2.0676	2.4604	0.116749	0.830183
Usp32	2.72623	7.81772	2.4626	0.116586	0.830183
Dhdds	-3.05952	3.38279	2.4591	0.116846	0.830323
Cul4a	2.97085	8.28527	2.45492	0.117157	0.83096
Gfpt1	1.89748	4.14366	2.45588	0.117085	0.83096
Chmp4b	1.69743	8.71198	2.45376	0.117244	0.83096
Cnot4	2.61808	3.62282	2.45376	0.117243	0.83096
Fads2	4.32325	2.82782	2.45244	0.117342	0.831108
Tgfbr3	3.52895	2.20094	2.44872	0.117621	0.832004
Rrp15	-2.39774	3.61213	2.44869	0.117623	0.832004
Tmem86b	3.19636	3.08436	2.44742	0.117718	0.832132
Zfp119a	3.31843	2.53245	2.44492	0.117906	0.832912
Mat2b	1.82621	7.90258	2.43755	0.118461	0.835521
mt.Co2	3.22106	2.6445	2.43834	0.118401	0.835521
Fbxl17	2.04556	4.12389	2.43489	0.118663	0.835521
Ypel3	2.91276	7.84715	2.43521	0.118638	0.835521
Esf1	-2.4385	3.85473	2.43631	0.118554	0.835521
4930455G09Rik	-4.37112	2.05497	2.43384	0.118742	0.835533
Oma1	-1.58064	4.03419	2.43176	0.118899	0.836094
Dld	-1.20535	5.45145	2.43011	0.119025	0.836433
Tmem183a	1.54274	6.56241	2.42697	0.119263	0.837372
Csnk1d	1.22219	6.55309	2.42631	0.119314	0.837372
Pccb	2.50253	3.5825	2.42351	0.119527	0.838133
Timeless	-2.6574	3.34058	2.42284	0.119578	0.838133
1600002K03Rik	-3.014	2.72454	2.42023	0.119777	0.838507
Tmem39b	-3.6179	1.18701	2.42011	0.119787	0.838507
Syce2	5.3167	2.29819	2.4165	0.120063	0.838739
Eif3k	1.76663	8.90787	2.4151	0.12017	0.838739
Tspyl1	1.71546	6.93169	2.41847	0.119912	0.838739
Pitrm1	2.69347	7.01596	2.4146	0.120209	0.838739
Alkbh6	-3.52014	2.09621	2.41542	0.120146	0.838739
Cobll1	-3.60232	2.21694	2.41315	0.12032	0.838923
Tubgcp5	-2.18896	3.68458	2.41223	0.120391	0.838923
Lmna	2.89283	4.75953	2.40843	0.120683	0.840418
Gtf3a	-1.32693	5.13096	2.39155	0.121993	0.840752
Mettl5	3.17126	2.04567	2.38933	0.122166	0.840752
Tmem181b.ps	3.66726	2.01015	2.38078	0.122836	0.840752
Slx1b	-3.25658	1.79346	2.38386	0.122594	0.840752
Atr	-1.35874	5.0316	2.38917	0.122179	0.840752
Cstb	1.3945	5.1138	2.38774	0.12229	0.840752
Sell	-1.36766	9.83958	2.38361	0.122614	0.840752
Zfp983	2.91312	2.66766	2.38145	0.122784	0.840752
Ackr3	7.82319	1.39197	2.39838	0.121461	0.840752
Capns1	1.41954	7.59651	2.37828	0.123033	0.840752
Hdgf	1.61478	5.4351	2.4054	0.120917	0.840752
Mbp	-1.20864	6.13368	2.39373	0.121823	0.840752
k	2.93608	3.60097	2.37582	0.123227	0.840752
Wdr43	-1.16906	5.79352	2.37793	0.12306	0.840752
Sec62	1.69337	7.48375	2.38403	0.122581	0.840752
Atp6v1f	1.76079	5.40421	2.39356	0.121836	0.840752
Trafd1	1.77711	7.40823	2.37662	0.123164	0.840752
Egln2	-1.69452	4.63319	2.39075	0.122055	0.840752
Rab11a	1.75848	6.5215	2.37956	0.122933	0.840752
Cchcr1	-4.63021	1.80736	2.38629	0.122404	0.840752
Anxa3	3.3008	4.76578	2.37664	0.123162	0.840752
Apoc1	17.5509	6.07038	2.39595	0.12165	0.840752
Tmtc3	-4.76252	1.19019	2.39312	0.12187	0.840752
Lynx1	-2.1376	4.11589	2.39822	0.121473	0.840752
Jaml	-1.59009	6.22936	2.39568	0.121671	0.840752
Cisd1	3.04134	3.78246	2.40534	0.120922	0.840752
Kif15	3.09361	3.65501	2.3792	0.122961	0.840752
Ranbp1	-1.5296	5.567	2.38259	0.122694	0.840752
Arhgap12	-2.0577	4.49046	2.38708	0.122342	0.840752
Gm16580	3.86943	3.87722	2.38622	0.122409	0.840752
Abcd3	2.32161	4.20662	2.38461	0.122536	0.840752
Cdkn1b	1.61438	6.31809	2.39038	0.122084	0.840752
Fam126a	2.83165	7.7071	2.36531	0.124059	0.843215
Bin1	-1.54953	7.13435	2.3677	0.123869	0.843215
Atg3	-1.13518	5.90003	2.36981	0.123702	0.843215
Rab3il1	4.97844	5.60504	2.36435	0.124136	0.843215
Hmgcs1	1.92542	4.87113	2.36629	0.123981	0.843215
Slamf8	-2.38985	4.3483	2.36688	0.123934	0.843215
Ass1	3.44297	5.4775	2.3667	0.123949	0.843215
Cd59a	3.3481	6.40475	2.36003	0.12448	0.843793
Alad	2.28846	4.96335	2.36051	0.124442	0.843793
Btf3l4	-1.52044	3.79329	2.35935	0.124534	0.843793
Slc7a5	3.46768	5.2492	2.36013	0.124472	0.843793
Sbds	1.18216	5.52668	2.35676	0.124741	0.844134
Hacd4	-2.05453	7.5203	2.35698	0.124724	0.844134
1700047M11Rik	-6.51824	1.72243	2.35564	0.124831	0.844212
A930005H10Rik	2.18257	3.56516	2.35437	0.124932	0.844368
Stn1	-2.26148	3.98803	2.35223	0.125104	0.845002
Syne2	-1.9076	3.17936	2.3489	0.125372	0.845433
Cluh	2.54428	3.52539	2.3485	0.125403	0.845433
Me1	8.57107	1.38266	2.34979	0.1253	0.845433
D030056L22Rik	1.78101	4.41226	2.34748	0.125486	0.84546
Iba57	2.92253	2.45577	2.3441	0.125758	0.84571
Slfn2	-1.43261	9.36441	2.34475	0.125705	0.84571
Ccdc167	-3.01004	3.1432	2.34475	0.125706	0.84571
Derl2	1.54616	4.96903	2.34264	0.125876	0.845977
Camp	4.12121	4.94976	2.34033	0.126063	0.846549
Gm10257	4.02279	2.21891	2.33964	0.126119	0.846549
Zfp692	-2.58703	2.92055	2.33822	0.126233	0.846793
Rdh11	1.25034	4.98224	2.3362	0.126397	0.846905
Mob3c	-1.84292	4.40312	2.33608	0.126407	0.846905
Uqcrh	2.11423	10.1381	2.33168	0.126765	0.848773
Pde7a	-1.39507	6.01374	2.32603	0.127226	0.850953
Ormdl1	1.49882	4.63742	2.32576	0.127248	0.850953
Wfdc21	4.14299	5.60471	2.29931	0.129432	0.852981
Ubac1	2.90446	8.30858	2.31233	0.128351	0.852981
Klc1	-1.57512	5.08338	2.29938	0.129426	0.852981
Gm20506	-3.12975	2.68568	2.31565	0.128077	0.852981
Man2a2	-1.30244	4.86418	2.29753	0.12958	0.852981
Mrps30	-1.64534	4.84002	2.30468	0.128984	0.852981
Sgo1	4.6351	2.48784	2.31602	0.128047	0.852981
Ttc30a1	7.21856	1.6999	2.2964	0.129674	0.852981
Smchd1	-1.21135	7.47555	2.30123	0.129272	0.852981
Papss1	-1.38437	4.02237	2.29976	0.129394	0.852981
Mrm1	-1.62658	4.1619	2.30346	0.129087	0.852981
Map1s	3.53765	1.97833	2.29809	0.129534	0.852981
1600020E01Rik	2.14653	7.09094	2.30085	0.129303	0.852981
Sp4	1.96488	3.95839	2.31834	0.127856	0.852981
Rasgrf2	3.38869	2.08902	2.30221	0.12919	0.852981
Orc2	-1.91939	4.64471	2.29498	0.129793	0.852981
Rpl18a	1.68252	9.99453	2.29729	0.1296	0.852981
Leprot	-1.69455	4.94991	2.29722	0.129606	0.852981
Ofd1	-2.12261	3.67804	2.30002	0.129373	0.852981
Slc7a7	2.92017	3.13257	2.30343	0.129089	0.852981
Pir	4.12317	3.21383	2.31433	0.128186	0.852981
Blnk	-1.62794	5.4567	2.29948	0.129417	0.852981
Gm7536	1.96616	3.67721	2.31333	0.128269	0.852981
Timm13	2.89482	4.28585	2.30132	0.129264	0.852981
Nbas	-1.47467	3.95789	2.30091	0.129298	0.852981
Mdc1	-1.8253	3.98528	2.29586	0.129719	0.852981
Gas6	5.39887	1.62872	2.31551	0.128089	0.852981
Bsdc1	3.31174	8.74751	2.29434	0.129846	0.852981
Ppp2r2d	-1.89319	4.74954	2.30809	0.128703	0.852981
Uspl1	-1.72741	5.41901	2.28943	0.130258	0.853601
Tlnrd1	-3.14495	2.21123	2.28899	0.130295	0.853601
Cox17	-2.72085	2.97387	2.28849	0.130337	0.853601
Trim26	-1.221	6.06789	2.29033	0.130183	0.853601
Cd36	2.60719	8.65381	2.2908	0.130143	0.853601
Man1b1	-1.26689	4.99892	2.28565	0.130576	0.854648
Efemp1	7.38681	1.65316	2.27147	0.131775	0.85528
Clec7a	-1.7412	7.39362	2.27614	0.131379	0.85528
Atp6v1a	-1.13476	6.13234	2.26785	0.132083	0.85528
Tmem234	1.28567	7.41635	2.27827	0.131199	0.85528
Med23	-2.02763	3.89962	2.26822	0.132052	0.85528
Rsph10b	4.59276	2.75258	2.28188	0.130893	0.85528
Aimp1	-1.37135	5.91174	2.27567	0.131418	0.85528
Atad3a	1.637	4.14609	2.27205	0.131726	0.85528
Ercc4	-1.93045	3.40759	2.28303	0.130796	0.85528
Bud31	1.2629	6.83384	2.27016	0.131887	0.85528
Sorcs2	-3.34452	2.03556	2.26875	0.132006	0.85528
Entpd5	-1.62704	5.06684	2.27248	0.131689	0.85528
Vdac2	-1.23625	7.01479	2.26765	0.1321	0.85528
Rhag	5.26027	4.32193	2.26941	0.13195	0.85528
Bnip1	-2.36127	3.97157	2.27996	0.131055	0.85528
Zeb1	2.06662	4.42844	2.28037	0.131021	0.85528
1700017B05Rik	3.00707	2.74485	2.274	0.13156	0.85528
Hinfp	-1.8669	4.26342	2.27668	0.131333	0.85528
Rpe	-1.57004	5.11578	2.1491	0.142654	0.855572
Adamts14	-3.03192	3.35657	2.13527	0.143946	0.855572
Tmem29	2.12117	5.35806	2.231	0.135266	0.855572
Psmc5	1.3314	6.01795	2.23281	0.135108	0.855572
Maml3	-4.46692	1.2472	2.22066	0.136175	0.855572
Igkv10.96	4.64781	1.76179	2.2556	0.133132	0.855572
Pkib	-2.32642	4.21183	2.13405	0.14406	0.855572
Uqcrfs1	1.01987	6.35859	2.18911	0.13899	0.855572
Fam168b	-1.18353	6.70569	2.25951	0.132796	0.855572
Gapvd1	1.58157	7.1214	2.21421	0.136745	0.855572
Bbs7	5.81749	1.75052	2.15662	0.141957	0.855572
G530011O06Rik	4.41684	0.631253	2.24261	0.134254	0.855572
Nek4	4.41374	2.27882	2.15727	0.141897	0.855572
Mutyh	-3.69839	1.928	2.21705	0.136493	0.855572
Hck	-1.3554	8.19021	2.22928	0.135417	0.855572
Psma5	1.30352	7.37505	2.22288	0.135979	0.855572
Zfp764	-1.97499	3.43287	2.18758	0.139128	0.855572
Prpf3	-2.45937	3.36241	2.24198	0.134309	0.855572
BC028528	-1.64241	4.69731	2.14655	0.142891	0.855572
Nup37	-2.05418	3.42894	2.1945	0.138504	0.855572
Bcat2	-2.21	3.80313	2.25658	0.133048	0.855572
Edrf1	1.4031	4.65236	2.1791	0.139897	0.855572
Serp2	-3.92645	1.30021	2.18721	0.139161	0.855572
Sprtn	-1.37918	4.6571	2.17998	0.139817	0.855572
Dip2c	4.66126	1.46518	2.18361	0.139487	0.855572
Ergic3	1.39209	5.0932	2.16758	0.140948	0.855572
Rhov	-5.36376	0.497369	2.14871	0.14269	0.855572
Med21	1.60069	4.88278	2.13334	0.144126	0.855572
Il1rl1	4.15542	2.33414	2.14898	0.142664	0.855572
Mccc2	2.61478	2.76337	2.15705	0.141917	0.855572
Katnbl1	-3.25864	2.49876	2.18573	0.139295	0.855572
Tsen54	2.22274	2.90763	2.14589	0.142952	0.855572
Yipf1	-1.30383	5.42005	2.13501	0.14397	0.855572
Tifa	-1.28299	5.44119	2.2078	0.137315	0.855572
Fgd6	-2.29887	2.79086	2.1801	0.139805	0.855572
Rnf113a2	2.43393	3.44606	2.16228	0.141435	0.855572
Mir22hg	-3.03879	3.20959	2.1746	0.140306	0.855572
Cebpz	-1.28468	6.06172	2.22779	0.135548	0.855572
Ankle2	-1.04697	5.85956	2.17602	0.140176	0.855572
Nifk	-1.48827	5.20081	2.15409	0.142191	0.855572
Plcb3	2.28156	2.79934	2.16903	0.140815	0.855572
D17Wsu92e	1.79401	7.76121	2.15332	0.142262	0.855572
Zbtb2	-2.12644	3.51436	2.17497	0.140272	0.855572
Ooep	-5.28207	1.71964	2.19842	0.138153	0.855572
Hsdl2	1.93298	4.92426	2.24249	0.134264	0.855572
Nek7	1.5445	7.08014	2.19849	0.138146	0.855572
Gbp10	-3.30707	3.56698	2.23276	0.135112	0.855572
Clptm1l	-1.13151	6.5821	2.2014	0.137886	0.855572
Pbld1	9.8445	1.44221	2.21244	0.136902	0.855572
Mks1	-3.55664	1.62965	2.22356	0.13592	0.855572
Mthfd1	1.9714	4.61119	2.14172	0.143341	0.855572
Ndufb2	2.39514	2.43368	2.22996	0.135358	0.855572
Gm45548	-3.38238	1.52745	2.16712	0.14099	0.855572
Ccnk	-3.58281	2.00639	2.21333	0.136823	0.855572
Shmt1	3.98171	3.16008	2.15297	0.142294	0.855572
Slc43a3	1.98981	4.42315	2.16354	0.141319	0.855572
Uqcrc1	1.28839	6.69897	2.14889	0.142673	0.855572
2310022B05Rik	3.06839	2.68151	2.14252	0.143266	0.855572
Ccdc91	2.04967	3.2537	2.16762	0.140944	0.855572
Clec2g	-6.09515	1.14007	2.17938	0.139871	0.855572
Hgsnat	-1.48856	5.9557	2.15698	0.141923	0.855572
Nfrkb	-1.59601	4.29419	2.26554	0.13228	0.855572
Gm37387	4.336	2.28459	2.26132	0.132641	0.855572
Pef1	1.6127	5.0735	2.18731	0.139153	0.855572
4833407H14Rik	-1.79144	3.9084	2.25126	0.133506	0.855572
Fam214b	2.90534	7.92964	2.18887	0.139011	0.855572
Tespa1	-2.60493	4.28294	2.18565	0.139302	0.855572
H13	-1.21313	5.52096	2.18597	0.139273	0.855572
Ywhae	-2.45483	2.68518	2.20375	0.137675	0.855572
Spef1	4.98111	1.31076	2.23355	0.135043	0.855572
Tnip1	2.61634	2.26811	2.22025	0.136211	0.855572
Gm12254	2.5775	1.9221	2.15646	0.141972	0.855572
Tmem143	-4.16096	1.41848	2.23236	0.135147	0.855572
Npc1	-1.39839	4.83559	2.15073	0.142502	0.855572
Tlcd1	5.44284	1.62057	2.17495	0.140274	0.855572
Zfp365	-6.52008	0.557219	2.21759	0.136446	0.855572
Smarca4	-1.73167	5.2311	2.15419	0.142182	0.855572
Nek2	3.09849	3.39565	2.24808	0.13378	0.855572
Smap2	1.18055	6.42979	2.1678	0.140928	0.855572
Trap1	-1.42008	5.45294	2.19525	0.138437	0.855572
Rfesd	2.49618	5.5974	2.23948	0.134527	0.855572
Psmd10	1.57412	5.5203	2.19449	0.138505	0.855572
Telo2	-2.69674	2.83198	2.17622	0.140158	0.855572
Stx12	1.43657	4.8506	2.16881	0.140835	0.855572
Pik3c2a	1.72078	4.8116	2.23869	0.134595	0.855572
Lipc	5.74031	2.87002	2.17289	0.140462	0.855572
Zfp689	-4.82135	1.54123	2.15464	0.14214	0.855572
Tnni2	-3.9175	1.2293	2.24788	0.133798	0.855572
Cenpk	2.15683	3.74848	2.23607	0.134824	0.855572
Lgals8	-1.31878	6.02212	2.26511	0.132317	0.855572
Ppfia1	2.60054	3.05936	2.1974	0.138244	0.855572
Eaf1	1.61985	4.9874	2.19778	0.13821	0.855572
Cenpt	3.9161	2.24586	2.1405	0.143455	0.855572
Dpysl2	-1.8768	4.50824	2.21906	0.136316	0.855572
Magt1	-1.30031	5.96558	2.17134	0.140603	0.855572
AI839979	2.70666	3.02061	2.18433	0.139421	0.855572
Rpp30	-2.54265	3.34326	2.14595	0.142947	0.855572
Plekhf1	5.39352	1.26299	2.15959	0.141682	0.855572
Fam169b	-1.44683	4.8453	2.14182	0.143332	0.855572
Ube2f	2.72957	7.04506	2.22475	0.135815	0.855572
Ip6k3	4.19991	1.58316	2.1371	0.143773	0.855572
Zfp94	3.81739	1.96349	2.25116	0.133514	0.855572
Wdr41	-1.94406	4.18757	2.1955	0.138414	0.855572
Tmub2	1.52159	3.8991	2.20335	0.137711	0.855572
Ccdc71l	2.67094	6.9654	2.1825	0.139587	0.855572
Thada	-2.0876	3.68229	2.14255	0.143264	0.855572
Pdcd7	-1.91687	3.56824	2.15219	0.142367	0.855572
Amfr	1.11986	7.0432	2.16932	0.140788	0.855572
Abcg2	3.53369	5.50781	2.20374	0.137677	0.855572
Fars2	1.72389	5.14415	2.2363	0.134803	0.855572
Slc2a8	4.25934	1.24501	2.14306	0.143216	0.855572
Gm48832	-7.39965	2.25957	2.23591	0.134837	0.855572
Strip2	7.54449	0.593279	2.18532	0.139332	0.855572
Upf2	1.34464	5.11107	2.20143	0.137883	0.855572
Rala	1.55094	5.04319	2.25483	0.133198	0.855572
Ddx39	1.25856	6.18242	2.22686	0.135629	0.855572
Dmxl2	2.82953	3.44845	2.20474	0.137587	0.855572
Rpl7l1	-1.18577	6.02095	2.14816	0.142741	0.855572
Tnpo3	-1.29929	5.61832	2.26419	0.132395	0.855572
Gm14005	-2.1988	3.47964	2.21997	0.136236	0.855572
Gstt2	2.18513	3.61469	2.24131	0.134367	0.855572
Rabep1	-1.24325	5.21242	2.15428	0.142173	0.855572
Rgs19	-1.14453	6.17729	2.13991	0.143511	0.855572
Sec61b	1.3085	5.99162	2.19561	0.138404	0.855572
Klhdc1	-1.9532	3.01399	2.13985	0.143516	0.855572
Ccnd2	-1.14382	6.16581	2.21983	0.136248	0.855572
Camsap1	2.8987	2.12294	2.21134	0.137	0.855572
Wdr26	2.64521	10.4955	2.2145	0.136719	0.855572
Ufsp2	-1.37893	5.01159	2.13356	0.144106	0.855572
Dvl1	2.08778	4.1506	2.25218	0.133426	0.855572
Ppp1r2	-1.41444	5.53352	2.18701	0.139179	0.855572
Klra5	6.49711	0.905637	2.14545	0.142993	0.855572
Mrpl50	1.65208	3.87002	2.234	0.135004	0.855572
Hdac10	-2.90941	3.33269	2.25388	0.13328	0.855572
Rpl37rt	1.95813	3.19701	2.14762	0.142791	0.855572
Hace1	1.7026	4.53312	2.13655	0.143825	0.855572
Tor3a	-1.67863	5.23792	2.19852	0.138144	0.855572
Asns	4.72309	5.23355	2.22412	0.13587	0.855572
Fundc1	-1.48915	4.64692	2.22789	0.135539	0.855572
Klhl42	-1.54948	4.4449	2.22215	0.136044	0.855572
Mrpl39	-1.75094	4.469	2.15652	0.141966	0.855572
Zc3hc1	-1.56059	4.36238	2.14722	0.142828	0.855572
Mrps7	1.93581	4.79052	2.20108	0.137914	0.855572
Mcpt4	6.5326	2.55936	2.1333	0.14413	0.855572
Igsf8	-3.31052	2.34281	2.20836	0.137265	0.855572
Ctsl	2.68586	5.53771	2.1663	0.141065	0.855572
Fbxw8	2.05471	3.31	2.17627	0.140153	0.855572
Ppil1	1.52195	5.14212	2.17691	0.140095	0.855572
Dusp3	-1.36494	5.67218	2.17819	0.139979	0.855572
Ccdc34	-3.97753	2.12243	2.14576	0.142964	0.855572
Grhpr	4.69508	2.28424	2.13717	0.143767	0.855572
Gatad2a	-1.39349	4.35262	2.13174	0.144277	0.855975
Prorsd1	-2.06652	3.96972	2.13062	0.144382	0.856126
Rps9	1.57828	10.4472	2.1284	0.144592	0.856899
Ighv1.64	-3.05519	2.17805	2.12751	0.144676	0.856925
Kcnj8	3.78486	2.49925	2.12586	0.144831	0.857375
Terf1	-2.57461	3.19793	2.12335	0.145069	0.85795
Gm15133	-4.0665	2.48569	2.12231	0.145167	0.85795
Apip	2.2177	3.9128	2.12256	0.145144	0.85795
Anp32a	-1.09085	7.26917	2.11663	0.145707	0.858633
Chmp5	1.18135	6.43013	2.11523	0.14584	0.858633
Tmem216	4.13277	1.51543	2.11524	0.145839	0.858633
Ift20	2.11257	6.72044	2.11572	0.145794	0.858633
Fktn	-3.21531	1.82253	2.11778	0.145597	0.858633
Stk38l	3.12591	3.09464	2.11661	0.145709	0.858633
Rpl41	2.71313	11.2923	2.11631	0.145737	0.858633
Baz2a	-1.41445	4.4243	2.09638	0.147648	0.858963
Chordc1	-1.42589	6.12083	2.01165	0.156096	0.858963
Nup35	1.89408	3.8991	2.03413	0.153802	0.858963
2003-03-01	4.36497	6.92874	2.04409	0.152798	0.858963
Tbcel	2.65551	5.78071	2.04461	0.152746	0.858963
Ulk3	-4.34818	1.45088	2.00763	0.15651	0.858963
Ifi47	-1.27975	8.65465	2.02935	0.154286	0.858963
Nudt5	1.64695	4.983	2.03036	0.154184	0.858963
Pdia3	-1.09215	7.70077	2.08228	0.149017	0.858963
Cep295	-1.73299	4.56571	2.04857	0.152349	0.858963
Txk	-1.57879	5.19246	2.11013	0.146327	0.858963
Slc7a6	1.72587	3.91102	2.04881	0.152325	0.858963
A430005L14Rik	-1.85002	3.59652	2.02557	0.154671	0.858963
Hmgn2	-1.3911	6.50691	2.04714	0.152492	0.858963
Rpl37a	1.42347	10.1587	2.02262	0.154972	0.858963
Cask	-2.42269	3.56637	2.09115	0.148155	0.858963
Tmem120b	4.48835	1.28882	2.06836	0.150383	0.858963
Cln8	2.0689	5.57391	2.09012	0.148255	0.858963
Mill2	-4.63817	1.59957	2.09065	0.148203	0.858963
Nup188	-2.75279	3.38142	2.04085	0.153124	0.858963
Acp6	2.17335	3.42119	2.0362	0.153593	0.858963
Asb1	3.06467	9.17828	2.01453	0.155799	0.858963
Casc3	1.43122	4.27229	2.09108	0.148161	0.858963
Zfp74	-3.06636	2.72067	2.04133	0.153076	0.858963
Dcun1d1	2.34856	7.55997	2.04591	0.152615	0.858963
Camk4	2.6344	4.40146	2.03451	0.153764	0.858963
Wasl	2.06455	3.21576	2.10348	0.146964	0.858963
Dap3	-1.53727	5.3901	2.0269	0.154535	0.858963
Gm43682	-5.33673	0.916566	2.05135	0.152071	0.858963
Htt	1.45789	4.96653	2.10665	0.14666	0.858963
Ddost	-1.33216	6.73228	2.06088	0.151123	0.858963
BC064078	2.06626	3.73861	2.02484	0.154745	0.858963
Rbm26	-1.73543	4.14399	2.03521	0.153693	0.858963
Rab12	2.14854	3.48227	2.05572	0.151636	0.858963
Gpr180	2.44499	3.52532	2.10499	0.14682	0.858963
Rpl10	1.47474	10.957	2.10951	0.146386	0.858963
Mapk9	-1.19462	5.29027	2.07656	0.149577	0.858963
Polr1a	-1.59513	4.57548	2.05823	0.151386	0.858963
Hemgn	4.56783	5.87449	2.08807	0.148453	0.858963
Zfp932	-2.3038	3.87924	2.09681	0.147607	0.858963
Pnn	-1.64348	4.26267	2.04685	0.152522	0.858963
Mri1	-1.84863	3.9246	2.08377	0.148872	0.858963
Trbv12.2	-3.53173	3.03417	2.01295	0.155961	0.858963
Sdhaf4	2.06744	3.32256	2.07005	0.150216	0.858963
Phyh	1.57276	5.93704	2.04623	0.152584	0.858963
Rpap2	1.44849	4.70208	2.03401	0.153814	0.858963
Nfat5	1.66661	4.76601	2.06075	0.151136	0.858963
Tmem43	-1.40775	6.16753	2.06715	0.150502	0.858963
Hormad2	5.41126	1.19109	2.01936	0.155305	0.858963
Dnajc18	-2.16456	3.54575	2.07135	0.150088	0.858963
Ythdf1	-1.22252	4.70174	2.02737	0.154488	0.858963
Rchy1	-1.24646	5.4818	2.00496	0.156786	0.858963
Mrgpra2b	4.98293	3.36492	2.00668	0.156608	0.858963
Kif9	-2.47978	2.49769	2.07035	0.150187	0.858963
Nomo1	-1.8236	5.68077	2.11099	0.146245	0.858963
Ndst2	-1.82024	4.34223	2.11364	0.145992	0.858963
Serpini1	1.95487	4.11487	2.11009	0.146331	0.858963
Glb1l	-2.87261	2.43216	2.07337	0.14989	0.858963
Mpc2	2.47426	8.39823	2.01724	0.155521	0.858963
Klra14.ps	-3.48965	3.17136	2.01199	0.156061	0.858963
Cpsf2	-1.0586	6.11508	2.10391	0.146923	0.858963
Lins1	-2.08436	2.84385	2.01672	0.155574	0.858963
Igfbp6	4.42121	0.931867	2.06996	0.150226	0.858963
Esco2	2.80052	5.7825	2.05036	0.152171	0.858963
Ranbp2	1.30917	6.93206	2.04204	0.153004	0.858963
Pcyt2	2.4822	3.75008	2.03152	0.154066	0.858963
Spaca9	-6.09674	1.50734	2.1129	0.146063	0.858963
Slc8b1	1.93634	4.08056	2.04191	0.153017	0.858963
Trbv29	-3.15401	2.87924	2.04303	0.152905	0.858963
Arfgap3	1.769	4.68332	2.09823	0.147469	0.858963
Gm17435	-4.24284	1.24739	2.07725	0.149509	0.858963
Prnp	3.10986	5.97875	2.09662	0.147625	0.858963
Ganc	-1.28606	4.48783	2.01919	0.155322	0.858963
Il2ra	4.76372	2.22246	2.07299	0.149927	0.858963
0.61	3.83047	2.05951	2.00527	0.156753	0.858963
Atg4a	3.61479	9.18453	2.07411	0.149818	0.858963
Prr13	1.69793	5.01529	2.05326	0.151881	0.858963
B4gat1	3.49801	1.78804	2.05289	0.151918	0.858963
Ndufc2	1.55727	4.45758	2.10387	0.146927	0.858963
Nfkbia	-1.26319	5.63725	2.01105	0.156157	0.858963
2810004N23Rik	-2.07811	4.20178	2.06374	0.15084	0.858963
Rps15	1.50684	8.92512	2.01014	0.156251	0.858963
Susd3	1.85949	4.50334	2.07974	0.149266	0.858963
Apbb1	-3.84875	1.33589	2.06632	0.150585	0.858963
Rbm48	2.07016	3.4022	2.09355	0.147922	0.858963
Rnf103	-2.31778	4.01966	2.08187	0.149057	0.858963
Pld4	-1.24037	7.1635	2.03248	0.153969	0.858963
Ndufaf6	-3.51872	1.75213	2.04706	0.152501	0.858963
Psmc3ip	4.73544	1.1289	2.01086	0.156177	0.858963
Tab2	1.45572	6.79722	2.05197	0.152009	0.858963
Lig4	-4.42216	1.7898	2.1081	0.146521	0.858963
Aicda	-7.6125	1.20009	2.05124	0.152082	0.858963
Rnf144a	-1.47719	5.15137	2.03379	0.153837	0.858963
Gpx4.ps2	2.14509	5.15037	2.06801	0.150418	0.858963
4931406C07Rik	3.85815	2.48226	2.06025	0.151185	0.858963
Vwa5a	1.5483	6.8275	2.09434	0.147846	0.858963
Mrps17	-1.11305	5.17345	2.00996	0.156269	0.858963
Gng5	1.71529	7.10523	2.07126	0.150098	0.858963
Knl1	2.82728	3.01901	2.0047	0.156813	0.858963
Klra3	-2.95378	3.87601	2.09226	0.148047	0.858963
Fbxl12	-2.63503	3.66859	2.00723	0.156551	0.858963
Mink1	-2.78025	2.46137	2.09486	0.147795	0.858963
Bhlhe41	-4.09192	1.72416	2.10152	0.147153	0.858963
Btbd9	-1.71832	4.37661	2.01261	0.155996	0.858963
Khk	3.49972	3.92639	2.02117	0.155119	0.858963
Mre11a	-1.514	4.56097	2.04013	0.153197	0.858963
Itsn2	-1.03608	6.98665	2.07726	0.149508	0.858963
Gapdh	1.41707	8.39692	2.0228	0.154953	0.858963
Spata1	-2.82573	2.12939	2.01413	0.155841	0.858963
Stxbp2	-1.36929	5.16176	2.03968	0.153242	0.858963
Ppm1b	1.74533	6.48651	2.091	0.148169	0.858963
Ttk	-5.1772	2.12021	2.05148	0.152058	0.858963
Atl3	-1.59081	5.44648	2.06142	0.15107	0.858963
D3Ertd751e	2.82337	2.78374	2.00808	0.156463	0.858963
9230112E08Rik	-3.55364	1.9179	2.02614	0.154613	0.858963
Kri1	-1.32136	5.17839	2.02277	0.154957	0.858963
Rbbp5	-1.70166	4.676	2.03845	0.153366	0.858963
Zfp788	-2.05539	3.61967	2.05671	0.151537	0.858963
Ppp3cb	1.39023	5.23478	2.10638	0.146686	0.858963
2006-09-01	-1.14667	6.99636	2.07398	0.14983	0.858963
Orc5	-2.71886	4.05635	2.03556	0.153657	0.858963
Sirpb1b	-1.59806	5.50997	2.03825	0.153386	0.858963
Ldhb	2.97227	3.75589	2.03944	0.153266	0.858963
Dennd4a	1.55932	7.42632	2.0661	0.150606	0.858963
Tax1bp1	2.34058	10.4441	2.05976	0.151234	0.858963
Ubl7	1.95101	4.85173	2.04712	0.152495	0.858963
Gm6863	2.00547	2.29006	2.00803	0.156468	0.858963
Praf2	-3.07222	2.54698	2.00474	0.156808	0.858963
Faim	1.8665	3.83231	2.06834	0.150385	0.858963
Cflar	-1.09146	6.34201	2.0124	0.156019	0.858963
Tnfrsf11a	-6.02811	0.926647	2.02931	0.154291	0.858963
Cdkn1a	4.11223	2.14312	2.04752	0.152454	0.858963
Riox2	-1.43495	4.75621	2.01551	0.155698	0.858963
Mlxip	-1.34236	5.13	2.04659	0.152548	0.858963
Stat4	-1.5969	5.34166	2.02632	0.154595	0.858963
Brms1l	2.2689	3.1537	2.05242	0.151964	0.858963
Mrpl17	2.12081	4.2384	2.01136	0.156125	0.858963
Zswim4	2.67439	2.81387	1.99776	0.157532	0.860482
Klhl36	-3.58711	1.86968	1.97683	0.159725	0.860482
Zfp143	-1.71927	4.64006	1.98073	0.159314	0.860482
Oscp1	-5.24722	1.19869	1.97457	0.159963	0.860482
Snw1	-1.05733	6.81188	1.98325	0.159049	0.860482
Cep76	2.77542	5.86721	1.98991	0.15835	0.860482
Snrpd2	1.15939	5.42027	1.99577	0.157739	0.860482
Anxa8	-4.62567	0.816598	1.99272	0.158057	0.860482
Plaur	-1.84194	4.19663	1.97636	0.159774	0.860482
Lilra6	-1.24214	5.08172	1.98362	0.15901	0.860482
Cdkl1	3.02292	4.52644	1.98827	0.158522	0.860482
Smarca2	-1.45339	4.35459	1.975	0.159918	0.860482
Bckdhb	3.37566	2.76096	1.98997	0.158344	0.860482
Ifi203	-1.26573	7.43235	1.98755	0.158598	0.860482
Fcgr1	-2.25401	5.35811	1.99225	0.158106	0.860482
Rpl38	1.51169	9.65261	1.99459	0.157862	0.860482
Il16	-1.15557	7.99752	2.00044	0.157253	0.860482
Slc25a4	1.1387	6.04715	1.98463	0.158904	0.860482
Hdlbp	0.997768	6.84249	1.98272	0.159104	0.860482
Pot1b	-1.56794	4.73319	1.99661	0.157652	0.860482
Tor4a	-1.05367	5.97129	1.97781	0.159621	0.860482
Vamp8	1.33191	6.85497	1.99362	0.157962	0.860482
Ifitm2	1.59816	4.27114	1.9782	0.15958	0.860482
Gm5905	2.01353	3.07071	1.97671	0.159737	0.860482
Gda	2.70202	12.3064	1.97462	0.159958	0.860482
Zw10	-1.2784	4.98467	1.99425	0.157897	0.860482
2310033P09Rik	-2.43933	2.40558	1.97961	0.159431	0.860482
Vezt	-2.4322	3.22751	1.98455	0.158912	0.860482
Pbrm1	1.86186	6.93004	1.99709	0.157601	0.860482
Lipt1	-4.17095	1.36476	1.99003	0.158338	0.860482
Polr2a	3.04717	2.17281	2.00111	0.157184	0.860482
[truncated: 8,781 more rows]

## Sheet: PcAS_Early-Control
SYMBOL	logFC	logCPM	LR	PValue	FDR
Serpina3f	5.33402	5.97168	36.5389	1.49648e-09	1.6132e-05
Cxcl9	9.0195	3.73284	28.4306	9.71159e-08	0.000523455
Oas1g	4.13332	5.12028	25.774	3.83833e-07	0.00103443
Ifit3b	4.18163	6.53	26.1693	3.12749e-07	0.00103443
Ccrl2	5.32942	4.45161	25.2407	5.06022e-07	0.00109098
Gbp2	3.91694	10.3345	21.4477	3.63603e-06	0.00653274
Spon1	6.89751	2.58279	20.603	5.65083e-06	0.00870228
Cep55	6.12762	3.27747	19.639	9.35393e-06	0.0126044
Tubb3	7.16345	2.86242	18.9878	1.31558e-05	0.0157578
Zfp942	-2.58018	4.30557	18.5181	1.68298e-05	0.0181425
Hspa2	7.38965	0.897176	18.1927	1.99642e-05	0.0195649
Myo1d	6.23054	2.8747	17.8527	2.38676e-05	0.0214411
Nek2	5.58146	3.39565	17.1375	3.47688e-05	0.0288314
Igtp	1.95936	8.9983	16.3954	5.14101e-05	0.0369467
Gm4841	5.64205	4.11787	16.4858	4.90165e-05	0.0369467
Gys1	6.54518	1.41199	15.8775	6.75761e-05	0.0428512
Phf11a	4.30467	5.33059	15.9501	6.5035e-05	0.0428512
AI847159	6.67032	1.17857	15.521	8.15952e-05	0.0462945
Shcbp1	6.43571	3.1082	15.5264	8.13619e-05	0.0462945
Gm12185	4.69649	4.52388	15.3888	8.75037e-05	0.0471645
Iigp1	3.93545	7.30418	14.8873	0.000114127	0.0555256
Upp1	5.64803	5.76842	14.8169	0.000118468	0.0555256
Zbp1	2.52379	8.3301	14.8354	0.000117313	0.0555256
Gbp6	2.1106	5.47325	14.6575	0.000128918	0.0579057
Irf7	2.49212	9.14713	14.468	0.000142563	0.0607289
Med16	3.73392	2.33808	14.417	0.00014647	0.0607289
Spag1	6.23152	1.54029	14.1057	0.000172823	0.0642425
[truncated: 10,753 more rows]

## Sheet: PcAS_Late-Early
SYMBOL	logFC	logCPM	LR	PValue	FDR
[truncated: 10,780 more rows]

[truncated: 4 more sheets: Py17XL_Early-Control, Py17XL_Late-Early, PyNL_Early-Control, PyNL_Late-Early]
