# Supplementary material for: Comparative transcriptomic analysis reveals translationally relevant processes in mouse models of malaria
Source: eLife. 2022 Jan 10;11:e70763. doi: 10.7554/eLife.70763 (PMC8747512; doi:10.7554/eLife.70763)
Supplement: Supplementary file 14. [file elife-70763-supp14.xlsx]

## Sheet: Key
Supplementary File 14 Lee et al 2018 Differential Expression Analysis
Table Column Names Key
Description: The results of the differential expression Analysis of the Lee et al., 2018 human RNASeq dataset. logFC values are given relative to the more severe phenotype.
Gene	Gene symbol
Pvalue	p-values
FDR	false discovery rate corrected p-values
logFC	log fold-change
Tab Names Key
CM	Cerebral Malaria
UM	Uncomplicated Malaria
HL	Hyperlactatemia
CH	Cerebral Malaria + Hyperlactatemia

## Sheet: HL-UM
Gene	Pvalue	Adjusted_Pvalue	logFC
MMP8	3.4e-09	4.16e-05	4.22722
UGCG	7.01e-08	0.000429744	1.1639
CYSTM1	1.66e-07	0.000673114	1.32944
STOM	2.2e-07	0.000673114	0.967246
RPS27	7.24e-07	0.00177399	1.0709
OLFM4	9.51e-07	0.00184975	3.88008
TCN1	1.06e-06	0.00184975	1.80754
LTF	1.55e-06	0.00237091	2.51914
S100A8	2.18e-06	0.00296176	1.54176
PDE4D	3.01e-06	0.0036821	0.704232
ARL4A	3.74e-06	0.00416219	1.28636
COL17A1	5.89e-06	0.00575543	2.09066
HP	6.11e-06	0.00575543	2.24595
IL1R2	7.8e-06	0.00676966	1.64615
CX3CR1	8.29e-06	0.00676966	-0.982747
ANXA1	9.84e-06	0.0072597	0.772275
CRISP3	1.04e-05	0.0072597	2.44629
MMP9	1.07e-05	0.0072597	1.92733
FOLR3	1.13e-05	0.00730739	2.32693
FCAR	1.37e-05	0.0080145	1.03201
LCN2	1.37e-05	0.0080145	2.78236
TFDP1	1.66e-05	0.00924233	0.831549
FAM47E-STBD1	1.82e-05	0.00967818	0.964853
RAB6A	1.92e-05	0.00980448	0.496732
PGM2L1	2.02e-05	0.00990846	0.82312
S100A12	2.3e-05	0.0108183	1.72119
ADAM9	3.06e-05	0.0131457	0.687791
RP11-321E2.5	3.08e-05	0.0131457	-2.28196
CD63	3.11e-05	0.0131457	0.804342
RP11-543P15.1	3.25e-05	0.013279	1.20362
SYNE2	4.14e-05	0.0163627	-0.639896
MCEMP1	4.49e-05	0.0168314	1.26617
ANXA3	4.53e-05	0.0168314	1.11078
LRRC75A-AS1	5.17e-05	0.0186467	0.894769
METTL9	6.46e-05	0.0226144	0.754131
CKS2	7.4e-05	0.0251769	1.128
MAP1LC3B	8.13e-05	0.0261212	0.485829
ENTPD7	8.14e-05	0.0261212	0.998088
RAB13	8.31e-05	0.0261212	1.04359
CHIT1	9.16e-05	0.0274298	1.12042
CDKN1C	9.18e-05	0.0274298	-1.87055
PFKFB2	9.41e-05	0.0274545	1.03014
AZI2	0.000100178	0.0277578	0.501711
AREG	0.000102891	0.0277578	1.64248
CA2	0.000102918	0.0277578	1.56768
PLIN2	0.000104208	0.0277578	0.989935
SH3PXD2A	0.0001112	0.0284629	-0.707333
FAM105A	0.000111501	0.0284629	0.510255
MYOM2	0.000114605	0.0286583	-1.6093
ITGA9	0.000127468	0.0312373	1.10516
CYP19A1	0.000130375	0.0313232	0.923436
ENPP4	0.000145822	0.0341623	0.87972
ARG1	0.000147768	0.0341623	1.76684
MIR155HG	0.000155972	0.0349287	0.989833
HIST1H4C	0.000156784	0.0349287	1.02664
NEDD4	0.000160919	0.0352097	0.679694
AC074289.1	0.000166621	0.0355069	-0.772116
SAR1B	0.000168073	0.0355069	0.40815
LDHA	0.000177684	0.036901	0.770958
GCLM	0.000188365	0.0384673	0.61395
GYG1	0.000192159	0.0385988	0.678607
ATP11B	0.000201621	0.0397654	0.469459
FBXO30	0.000204772	0.0397654	0.395611
TFRC	0.000208745	0.0397654	0.688405
CKAP4	0.000210948	0.0397654	0.797871
ARL6IP1	0.000224473	0.0416738	0.532175
RPSAP58	0.000235138	0.0427866	1.24138
KIZ	0.000237451	0.0427866	-0.419046
PPP1CB	0.000245208	0.043544	0.496833
ASPH	0.000261149	0.0456174	0.754127
TPT1	0.00026433	0.0456174	0.751101
ZNF37BP	0.000275559	0.0468949	-0.357465
CD81	0.000297119	0.049506	0.615072
SAMD3	0.000298984	0.049506	-0.601839
BCL2A1	0.000313042	0.0511426	1.02347
AL161784.1	0.000324903	0.0517811	1.08844
COL6A2	0.000325401	0.0517811	1.41203
GADD45A	0.000337381	0.052999	1.07618
EMP1	0.000352352	0.0546502	1.33323
RPS13	0.000359142	0.0550071	0.494587
CEACAM8	0.000370343	0.0560223	1.98431
CAPG	0.000407171	0.0608423	0.647718
RGL4	0.000422409	0.0623588	1.32641
PGK1	0.00043054	0.0628025	0.511707
ZDHHC20	0.000440376	0.0634815	0.554152
QSOX1	0.000449192	0.0639995	0.665095
SPP1	0.000459092	0.0641661	2.2305
TGFBR3	0.000464353	0.0641661	-0.685063
MFF	0.000467418	0.0641661	0.348081
SLC2A3	0.000471309	0.0641661	0.687409
KIR3DL2	0.00049455	0.0665903	1.39859
SREK1IP1	0.000508934	0.0673576	0.32758
SOCS4	0.000511243	0.0673576	0.373987
CCL20	0.000526404	0.0686173	2.34427
NCEH1	0.000569232	0.073419	0.57996
VNN3	0.000581915	0.0734557	-0.892667
NFATC2	0.000584407	0.0734557	-0.544583
RPL10	0.000587502	0.0734557	0.464607
LINC00869	0.000613345	0.0755485	-0.69166
HIST1H3B	0.000616571	0.0755485	0.901784
CST7	0.00063943	0.0771358	0.956493
AKAP5	0.000642116	0.0771358	1.09921
DCK	0.000662577	0.0775199	0.461521
RPS14	0.000664512	0.0775199	0.666355
KIAA1257	0.000669032	0.0775199	-0.947434
ITGA7	0.00067062	0.0775199	0.916344
PTPN22	0.000717515	0.0821656	0.38288
BCL2L15	0.000754144	0.0855605	1.20637
AC093495.4	0.000770129	0.0865724	-0.825256
SDC4	0.000790435	0.0876471	1.20234
BCAT1	0.000793995	0.0876471	0.701041
NUP50-AS1	0.000806729	0.0882576	-0.687314
DACH1	0.000822086	0.0888072	0.732629
S100A9	0.000826248	0.0888072	0.807343
BOD1L1	0.000848708	0.0890886	-0.338656
RETN	0.00085044	0.0890886	1.78249
TNFRSF25	0.000850678	0.0890886	-0.605998
EPHA4	0.000875616	0.0897561	-0.622449
PCOLCE2	0.000886015	0.0897561	1.72753
GAS2L3	0.000892767	0.0897561	0.600978
SEC62	0.000892809	0.0897561	0.667829
FNBP1L	0.00089638	0.0897561	0.687005
DNAJB4	0.000902504	0.0897561	0.832245
SLPI	0.00090833	0.0897561	1.55328
DHCR7	0.000927241	0.0908919	1.11538
SFXN1	0.000951511	0.0925307	0.558631
NAP1L5	0.000963766	0.0927304	0.726115
ZNF33B	0.000968701	0.0927304	-0.346444
STAT6	0.000982774	0.0933483	-0.323419
FTL	0.00100206	0.0944478	0.542943
GAPDH	0.00103532	0.0961847	0.55947
RPLP1	0.00103619	0.0961847	0.553954
RHEB	0.0010547	0.096852	0.385738
ART4	0.00106298	0.096852	1.47192
ELANE	0.00106709	0.096852	2.63641
HK3	0.00108437	0.0976972	0.546946
TXN	0.00111082	0.0984723	0.655901
RPS11	0.00111144	0.0984723	0.529046
PLEKHO1	0.00111855	0.0984723	-0.487218
CD24	0.00112512	0.0984723	1.4308
DEFA4	0.00116168	0.100456	2.46896
VCAM1	0.00116817	0.100456	1.8701
NUDT4	0.00117238	0.100456	0.657811
RP11-448G15.3	0.00118808	0.101094	-0.502936
CARD9	0.00119643	0.101103	-0.629955
RPL31	0.00127492	0.106346	0.956085
RPL39	0.00127584	0.106346	0.884926
CSGALNACT2	0.00135205	0.111807	0.396996
FRY	0.00135961	0.111807	-0.7629
CLIC2	0.00138389	0.113046	1.06184
LRRN1	0.00139524	0.113218	0.91984
ATP8B4	0.00140537	0.113289	0.70003
TMEM56	0.00145151	0.116131	1.22982
RP11-996F15.2	0.00145957	0.116131	-0.752358
ABCA13	0.00152184	0.120304	1.1854
E2F2	0.00154241	0.121148	0.742067
GJB6	0.00157174	0.122524	2.32884
SLC51A	0.00157993	0.122524	1.02575
CTSG	0.00161554	0.123968	2.65496
CD163	0.00162219	0.123968	1.12558
MSMO1	0.00163004	0.123968	0.564272
CDKN2D	0.00163901	0.123968	0.566584
NOP10	0.00168539	0.125581	0.621341
OLR1	0.00169016	0.125581	1.71086
RPS5	0.00169108	0.125581	0.540912
BTN3A3	0.00170944	0.126179	-0.679294
EVC2	0.00174573	0.127351	-0.595936
ATP6AP1L	0.0017461	0.127351	-0.672314
RPS17	0.00180537	0.130895	0.910791
SAMSN1	0.00182266	0.130899	0.770803
C14orf159	0.00183876	0.130899	-0.751667
P2RY1	0.00184015	0.130899	0.718406
TRANK1	0.00184817	0.130899	-0.892895
CLEC5A	0.00188157	0.132292	0.878716
SLC25A53	0.00190168	0.132292	-0.380341
RPL24	0.00190223	0.132292	0.591154
SAV1	0.00191102	0.132292	0.388328
TRAJ31	0.00194977	0.134216	-0.722549
SPINT1	0.00196379	0.134426	-1.11244
DDIT4	0.00198474	0.134986	0.75486
ITGB3BP	0.00199629	0.134986	0.509823
KL	0.00201138	0.134986	0.855748
BPI	0.00202064	0.134986	1.23166
CCL3	0.00202705	0.134986	1.38755
METTL7B	0.00205629	0.136193	1.43892
ACTR10	0.00209263	0.136964	0.358955
SPTSSA	0.0020956	0.136964	0.526465
CCNA1	0.00211229	0.136964	1.71469
EXOSC4	0.00212337	0.136964	0.859647
RPS18	0.00212383	0.136964	0.669753
RGS1	0.0021358	0.137016	0.873713
OSM	0.00217895	0.139056	0.817777
BATF2	0.0022032	0.139874	-1.01503
CXCL8	0.00227784	0.143304	1.81698
CLCN7	0.0022806	0.143304	-0.62457
CALCRL	0.00230501	0.144018	0.74165
CTTNBP2NL	0.00235738	0.144018	0.681702
RPL29	0.00236072	0.144018	0.456177
FSD1L	0.00236221	0.144018	0.546409
FAM65C	0.00236272	0.144018	1.20026
DCUN1D1	0.00236632	0.144018	0.531119
RPLP0	0.00238984	0.144018	0.494726
OLAH	0.00239745	0.144018	1.29122
ST6GALNAC3	0.00240716	0.144018	0.634648
RPS6KA5	0.0024209	0.144018	-0.608786
SLC19A1	0.00242126	0.144018	-0.571962
RPS21	0.00247873	0.146724	0.878209
RPL13	0.00251551	0.147582	0.373936
PCBP1-AS1	0.00251732	0.147582	-0.682916
SLC2A1	0.00255449	0.148041	0.793768
RPL23	0.00255458	0.148041	0.848941
GALT	0.00257279	0.148041	-0.387378
IVD	0.00257346	0.148041	-0.464993
CEP63	0.00261244	0.149581	-0.483642
CTD-2215E18.1	0.00262824	0.149785	0.85968
KIFC3	0.00264639	0.150122	0.689015
HIST1H2AI	0.00266932	0.150585	0.652199
YOD1	0.00267914	0.150585	0.96222
CEBPE	0.00269699	0.150609	1.18963
DEFA3	0.00270416	0.150609	2.32725
TAF9	0.00273923	0.151353	0.421217
ATL2	0.00274222	0.151353	0.29128
IL10RA	0.00276163	0.151471	-0.345718
MRPL45	0.00277014	0.151471	0.449816
DUSP2	0.00278144	0.151471	0.758248
HIST1H2BM	0.00285555	0.152944	0.776917
TRAJ23	0.00286714	0.152944	-0.611057
IL10	0.00287021	0.152944	1.26017
MRPL42	0.00287299	0.152944	0.30236
RPS12	0.00287994	0.152944	0.561519
RAP2A	0.00288338	0.152944	0.423852
RHAG	0.00292902	0.154403	1.41287
CSNK1G3	0.00294628	0.154403	0.424163
TRBV28	0.00294868	0.154403	-0.692001
OAT	0.00296415	0.154552	0.554809
CCDC88C	0.00299544	0.15492	-0.35966
ZFR	0.00300413	0.15492	0.209408
CD6	0.00300913	0.15492	-0.5467
RP11-730K11.1	0.00303672	0.155686	-0.765226
CTSD	0.00307512	0.156324	0.592352
AGFG1	0.00309553	0.156324	0.416684
MT1F	0.00309918	0.156324	1.25217
RPL41P1	0.00310021	0.156324	1.01961
IMPDH2	0.00317711	0.159546	0.450607
MORC2	0.00321604	0.15959	-0.284904
CCM2	0.00322233	0.15959	-0.361056
KLHL23	0.00323936	0.15959	0.691708
BEST1	0.00325193	0.15959	-0.431838
ACAD10	0.00325833	0.15959	-0.357432
PTGER2	0.00326466	0.15959	0.498556
SERPINB1	0.00326917	0.15959	0.672272
HIST1H4F	0.00329168	0.160051	0.747136
COMMD6	0.00332731	0.161144	0.931949
TBC1D22A	0.00334142	0.161191	-0.304187
SNHG6	0.00337123	0.161991	0.622469
LAMTOR3	0.00339262	0.162382	0.348228
MPO	0.003437	0.163866	2.03695
GPR84	0.00347004	0.164667	1.12861
NSUN7	0.00348068	0.164667	0.768728
RNASE2	0.00351351	0.16535	0.988147
MAFG	0.0035417	0.16535	0.685286
RP1-39G22.7	0.00354677	0.16535	0.576958
RP11-256L6.3	0.00354909	0.16535	-1.15959
PKM	0.00364463	0.169158	0.556459
SLC25A24	0.00367492	0.169505	0.432602
CCNG1	0.00368818	0.169505	0.305375
SLFN12L	0.0036936	0.169505	-0.441602
CTSB	0.00372102	0.170126	0.561038
SNX3	0.00378542	0.172426	0.493058
RP11-61F12.1	0.00384589	0.174532	-1.11705
RP11-640L9.2	0.00389618	0.175534	-0.990383
GPR56	0.00390315	0.175534	-0.877033
YWHAH	0.00391482	0.175534	0.548341
HSPA4L	0.00392526	0.175534	1.33024
TMCC2	0.00394602	0.17582	1.25605
TMCC1	0.00396882	0.175835	-0.377897
LRRC58	0.00397506	0.175835	0.247043
MME	0.00400001	0.176303	-1.3879
RPL35A	0.0040155	0.176322	0.732594
UBN1	0.00402922	0.176322	-0.529339
RPL35	0.00405767	0.176935	0.645715
SPRYD7	0.0041511	0.17953	0.410576
RWDD1	0.00415176	0.17953	0.37484
METRNL	0.00416116	0.17953	0.62079
FCGR2C	0.00419694	0.179809	-1.11726
EPHB1	0.00420266	0.179809	-1.03055
RPS15	0.004218	0.179809	0.495746
ARMC2	0.00422631	0.179809	-0.432865
CECR1	0.00427714	0.181342	-0.632465
AURKA	0.00441365	0.186438	0.575654
ATP5L	0.00442777	0.186438	0.468223
RP4-673D20.6	0.00449881	0.18824	-0.652892
RPL30	0.00451286	0.18824	0.568813
ZDHHC18	0.00451664	0.18824	-0.390592
SLC1A3	0.00455062	0.189013	1.09587
RP11-81H14.1	0.00463323	0.191794	-0.720602
GNAQ	0.00474868	0.195458	0.324202
ACTRT3	0.00477665	0.195458	1.60047
IDI1	0.00479035	0.195458	0.798866
HDGFRP3	0.00479302	0.195458	0.532634
PGD	0.00480151	0.195458	0.46391
RPS2P5	0.00481947	0.195534	0.446617
RPL27	0.0048353	0.195534	0.885524
PLEKHG3	0.00488216	0.195658	-0.643931
GABARAPL2	0.00489232	0.195658	0.656105
CTC-231O11.1	0.00489734	0.195658	-0.709882
ZFAND2A	0.00490523	0.195658	0.731633
RPLP2	0.00491819	0.195658	0.504288
KLF6	0.00496639	0.196302	0.310955
FBXO34	0.00496643	0.196302	0.306112
SLC2A3P2	0.0050384	0.198507	-1.09667
PLBD1	0.00522108	0.204261	0.572765
RP11-686D22.10	0.00523049	0.204261	-0.523283
C15orf48	0.00523447	0.204261	1.70746
ARL8B	0.00526596	0.204838	0.304971
ELP3	0.00533605	0.205981	-0.270089
ANKRD44	0.00535298	0.205981	-0.375337
KIAA1407	0.00536145	0.205981	-0.414922
MRPL15	0.0053626	0.205981	0.587457
NCF1	0.0053927	0.20649	-0.572436
RP11-84G21.1	0.00544508	0.207194	0.45978
TP53I3	0.00548373	0.207194	0.657713
PPP6C	0.00548972	0.207194	0.236082
LRG1	0.00549551	0.207194	0.562771
IVNS1ABP	0.00549564	0.207194	0.408973
RP11-362F19.1	0.00553537	0.208052	-1.07651
CD177	0.00558807	0.208769	1.67764
AC011816.1	0.00558851	0.208769	-0.85804
RHOA	0.0056877	0.209605	0.31417
USP12	0.00569654	0.209605	0.797278
KRAS	0.0056991	0.209605	0.359544
CCR3	0.00570411	0.209605	-1.14324
MZT2B	0.00572104	0.209605	0.540485
SPTA1	0.00572708	0.209605	1.37889
LAMB3	0.00574504	0.209605	1.07545
DEPDC1	0.00574775	0.209605	0.630242
TMA7	0.00577132	0.209607	0.859723
THBS1	0.00578496	0.209607	1.02853
SPN	0.00579914	0.209607	-0.455637
ARL8A	0.00584561	0.210665	0.348111
GPSM2	0.00593397	0.212909	0.526928
GK-IT1	0.00594261	0.212909	-1.04857
RPS27A	0.00598889	0.213941	0.645339
RPS8	0.00602533	0.214618	0.501207
GAS5	0.00605159	0.214686	0.471034
CA1	0.0060623	0.214686	1.95089
PCED1B-AS1	0.00609611	0.215261	-0.344157
CXCR2P1	0.00614283	0.216288	-1.10485
PRC1	0.00618627	0.216708	0.563011
ZNF33A	0.00619496	0.216708	-0.390713
SCN3A	0.00622055	0.216708	0.808637
CCL4	0.00625365	0.216708	1.13732
SGOL2	0.00626134	0.216708	0.554178
LINC00152	0.006306	0.216708	-0.580384
REM2	0.00630858	0.216708	-0.925101
HNRNPA1P70	0.00631064	0.216708	-0.913986
BNIP3	0.00632535	0.216708	0.500313
RPL18	0.00634279	0.216708	0.40334
CA12	0.00634931	0.216708	1.49416
HIST1H4L	0.00641547	0.217658	0.748931
KPNA4	0.00642138	0.217658	0.255018
ST13	0.00644266	0.217658	0.46123
RPL34	0.0064482	0.217658	1.04431
ARFIP1	0.00647819	0.217854	-0.380668
ZCCHC6	0.00648958	0.217854	-0.422509
TMEM57	0.00653703	0.218191	0.371393
TCTEX1D1	0.00655271	0.218191	0.956446
OPLAH	0.00656389	0.218191	0.84849
KBTBD6	0.0065725	0.218191	0.58235
ZBTB10	0.00658866	0.218191	0.346524
VBP1	0.00663156	0.21868	0.443569
FAM20B	0.00663912	0.21868	0.431782
KIF18A	0.00668372	0.218882	0.425221
MVB12B	0.00668404	0.218882	0.682763
SLC25A51	0.00673964	0.218882	0.390823
RP11-142E9.1	0.00674944	0.218882	-0.526544
RP11-245J9.4	0.00675167	0.218882	-0.653278
S100Z	0.0068091	0.218882	-0.842038
LMNA	0.00680982	0.218882	0.764996
ZNF639	0.00681176	0.218882	0.273614
DPEP2	0.00681419	0.218882	-0.753332
TMEM154	0.00682435	0.218882	-0.381649
MAD2L2	0.00684173	0.218882	0.481097
MAN2B2	0.00688599	0.219724	-0.343126
S100P	0.00691101	0.21995	1.47153
SDF2	0.0069473	0.220532	0.348061
SGMS2	0.00698062	0.221017	0.602868
RP11-635N19.2	0.00700274	0.221146	-0.412067
NLRC5	0.00717336	0.225539	-0.468425
ATXN2L	0.00717867	0.225539	-0.552395
CCNYL1	0.00720879	0.225638	0.318037
DNAJC19	0.00721864	0.225638	0.339072
CRLS1	0.00724022	0.225736	0.297521
INPP4A	0.00727278	0.225826	-0.396477
AK3	0.00728351	0.225826	0.285907
CDKN3	0.00729839	0.225826	0.742225
PLA2G7	0.00733377	0.226349	1.09256
GIMAP5	0.00739181	0.227226	-0.316525
GCA	0.00740205	0.227226	0.521088
COX7C	0.00741782	0.227226	0.706031
CTB-61M7.2	0.00743638	0.227227	0.900078
RPS20	0.00749765	0.228529	0.534664
CORO1B	0.00754134	0.228638	-0.396843
RP11-426C22.5	0.00754568	0.228638	-0.662382
SLC16A1	0.0075572	0.228638	0.4965
LAIR1	0.00758787	0.229	0.489424
CA4	0.00762005	0.229295	0.755204
ITGAD	0.00763505	0.229295	1.40402
DISC1-IT1	0.0076702	0.229787	-1.00301
GSKIP	0.00770678	0.230195	0.390358
RP11-640L9.1	0.00772138	0.230195	-0.885428
SLIRP	0.00776815	0.230378	0.680561
FAM84B	0.00778281	0.230378	0.375469
PAFAH2	0.00778394	0.230378	-0.366239
C22orf34	0.00782446	0.23102	-0.631803
DEPDC1B	0.00793654	0.232248	0.595221
FGFBP2	0.00793899	0.232248	-0.554591
RP5-1014D13.2	0.00795163	0.232248	-0.372432
HIST1H1B	0.00795385	0.232248	0.665896
VSTM1	0.00796669	0.232248	0.905333
CTB-193M12.4	0.00800056	0.232248	-0.602322
CD5	0.00800408	0.232248	-0.48436
POLR2H	0.0080177	0.232248	0.402514
HSPH1	0.00813893	0.233597	1.30687
MS4A7	0.00816486	0.233597	-0.566287
ASPRV1	0.00818763	0.233597	-1.09293
TRAF3IP3	0.00819445	0.233597	-0.364132
BARD1	0.00820635	0.233597	0.348527
CXCR2	0.00824024	0.233597	-0.62508
RPL18A	0.00824255	0.233597	0.484287
ATP5C1	0.0082555	0.233597	0.398493
UROD	0.00825724	0.233597	0.532265
LUCAT1	0.0082591	0.233597	-0.768161
MS4A3	0.0082929	0.233597	1.59382
RPL27A	0.00830558	0.233597	0.448113
IFNAR2	0.00832527	0.233597	-0.365974
TRIM66	0.00833118	0.233597	-0.569785
PFKFB3	0.00842032	0.233748	0.625387
USP10	0.00842338	0.233748	-0.5522
CASP4	0.0084255	0.233748	-0.388685
ATF4	0.00847094	0.233748	0.371928
LEPR	0.00849495	0.233748	0.613445
PFDN5	0.00849598	0.233748	0.638264
TMEM216	0.00849697	0.233748	0.428415
RPL18AP3	0.00854406	0.233748	0.549431
PNP	0.008553	0.233748	0.703169
RPL38	0.00855761	0.233748	0.361602
LNX2	0.00856206	0.233748	0.42996
ALPK1	0.00857991	0.233748	-0.478159
SMIM20	0.00858455	0.233748	0.559785
GTF2A2	0.00866567	0.235239	0.377341
KIF27	0.0086777	0.235239	-0.667784
RFESD	0.00879823	0.237569	0.622365
FOXN2	0.00880246	0.237569	0.2855
TNFRSF10D	0.00884854	0.238288	0.661278
HIST1H4H	0.00887976	0.238605	0.617519
TJP2	0.0089176	0.239097	-0.614391
RPL36	0.00895117	0.23911	0.477193
GZF1	0.00896394	0.23911	0.355703
TIMM23B	0.00897664	0.23911	-0.401595
GNAI3	0.00902053	0.239151	0.258057
FLT1	0.0090449	0.239151	0.797623
HIST1H2AE	0.00905478	0.239151	0.579447
MYO1F	0.0090737	0.239151	-0.332493
IL18BP	0.00909015	0.239151	-0.831156
SLC37A2	0.00916482	0.239151	-0.484519
NLRC4	0.00917674	0.239151	0.31836
SPRY2	0.00917883	0.239151	1.03837
GBP2	0.00919303	0.239151	-0.391521
RHOB	0.00919331	0.239151	0.752359
OSBPL3	0.0091962	0.239151	-0.331455
CTC-479C5.12	0.00922651	0.239151	-0.506715
HIST1H2BO	0.00924669	0.239151	0.574332
RP5-906C1.1	0.00927975	0.239151	-0.669803
GMFB	0.00931408	0.239151	0.342845
XXbac-BPG283O16.9	0.00932852	0.239151	-0.439075
BCL9L	0.00934392	0.239151	-0.779393
HIST1H4E	0.00934707	0.239151	0.6503
HAUS2	0.00934901	0.239151	0.325116
CD40LG	0.00938302	0.239521	-0.508809
CLASRP	0.00942764	0.24016	-0.464659
CCT2	0.00946983	0.240505	0.452544
RP11-77A13.1	0.00948044	0.240505	2.23486
VPS26A	0.00950576	0.240585	0.279163
ZFAT	0.00952288	0.240585	-0.274098
PIEZO1	0.00958819	0.241044	-0.507412
RPS7	0.00959497	0.241044	0.579824
HMGB2	0.00960006	0.241044	0.629015
TPI1	0.00962347	0.241138	0.519496
ARNTL	0.00968984	0.242305	-0.291773
DR1	0.00973339	0.242899	0.24508
HMGN2	0.00984424	0.245166	0.387887
TWSG1	0.00986486	0.245181	0.497885
RBL2	0.0100405	0.248665	-0.267683
CDADC1	0.0100551	0.248665	0.432867
PPAP2B	0.0100659	0.248665	0.91126
HMGB1	0.0101659	0.250335	0.4327
TRAPPC9	0.0101924	0.250335	-0.42882
RP11-182N22.9	0.0101948	0.250335	-0.519568
TMEM70	0.0102249	0.250439	0.474377
MMGT1	0.01024	0.250439	0.300772
CD55	0.0102982	0.251039	0.460945
CXCR4	0.0103265	0.251039	0.583262
POLR2K	0.0103293	0.251039	0.590991
TIMM8B	0.0103464	0.251039	0.603368
CISD2	0.0103932	0.251675	0.711738
C9orf40	0.0104686	0.252667	0.644172
RP11-555K12.2	0.0104754	0.252667	-0.702599
H2AFZ	0.0105139	0.253098	0.443731
TMEM218	0.0105359	0.25313	-0.258711
HINT1	0.0105825	0.253552	0.611653
HOMER1	0.0105948	0.253552	0.412329
NDUFAF2	0.0106171	0.253589	0.657859
UBQLN1	0.0106863	0.254496	0.24234
PKP2	0.0107093	0.254496	0.666722
HSPA1B	0.0107184	0.254496	1.3958
NEDD9	0.0107622	0.254496	-0.528587
C3orf58	0.0107686	0.254496	0.315324
PATL2	0.010781	0.254496	-0.493363
CETN3	0.0108011	0.254496	0.584254
CAP1	0.0108212	0.254496	0.264528
CTD-3088G3.8	0.0108953	0.255084	-0.798153
RPL32	0.0108993	0.255084	0.340617
TLE1	0.0109194	0.255084	0.497517
SYPL1	0.0109511	0.255084	0.279982
CCDC88B	0.0109633	0.255084	-0.332163
MAN1B1	0.0109995	0.255084	-0.373492
RPLP0P6	0.0110078	0.255084	0.49231
DYRK3	0.0110128	0.255084	0.896469
LLGL2	0.0110456	0.255261	-0.398788
GBE1	0.0110621	0.255261	0.39054
HMGB3	0.0111263	0.256092	0.784549
MYH3	0.0111399	0.256092	-0.447417
DISC1	0.0111939	0.256755	-0.571175
RPL15	0.0112304	0.256755	0.428784
HSPE1	0.0112323	0.256755	1.03133
C7orf73	0.0112723	0.256755	0.482311
TSPO	0.0112735	0.256755	0.451192
ARHGAP25	0.0113346	0.257333	-0.325868
SLC39A8	0.0113652	0.257333	0.905692
SIPA1L1	0.0113764	0.257333	-0.453445
ASS1P1	0.0114061	0.257333	-0.751646
SDCBP2-AS1	0.0114916	0.257333	-0.419802
CEP70	0.0114969	0.257333	0.418195
RP5-940J5.9	0.0115395	0.257333	0.819379
ITGAL	0.0115495	0.257333	-0.395944
KIAA1324	0.0115767	0.257333	-1.12356
FOXO3	0.0115897	0.257333	0.841901
ADAMTSL4-AS1	0.0116221	0.257333	-0.65338
BTN3A1	0.0116222	0.257333	-0.590324
RPS29	0.0116236	0.257333	0.507297
FEM1C	0.011659	0.257333	0.32292
B3GNT5	0.0116643	0.257333	0.54359
TDRD9	0.011677	0.257333	0.713607
HSBP1	0.0116777	0.257333	0.518535
DHRS9	0.0116783	0.257333	0.500957
PDK4	0.0117299	0.257333	0.691944
NAGK	0.0117314	0.257333	-0.341739
RHCE	0.0117431	0.257333	1.33938
IFT57	0.0117609	0.257333	0.438508
HPGD	0.0117849	0.257398	0.843321
ZRSR2	0.0118236	0.257785	-0.453296
SPTBN1	0.0119283	0.258982	-0.342568
MOCS2	0.011929	0.258982	0.344175
KCNE1	0.0119819	0.258982	0.608552
ITFG2	0.0119939	0.258982	-0.279882
VPS35	0.0120172	0.258982	0.291855
C14orf2	0.0120716	0.258982	0.567452
CREM	0.0121279	0.258982	0.545531
CD69	0.0121554	0.258982	0.645602
ENTPD1-AS1	0.0121637	0.258982	-0.292049
AP3S1	0.0122368	0.258982	0.311627
DCLRE1B	0.0122564	0.258982	0.46704
SNRPG	0.0122593	0.258982	0.653782
HIST3H2A	0.0122907	0.258982	0.534033
UBL5	0.012304	0.258982	0.626744
PLSCR4	0.0123144	0.258982	1.00529
C9orf91	0.0123444	0.258982	-0.618349
NCOR2	0.0123559	0.258982	-0.459892
PA2G4P4	0.0123997	0.258982	-0.510697
GPR155	0.0124073	0.258982	-0.370177
PREX1	0.0124338	0.258982	-0.307565
SP140	0.0124383	0.258982	-0.459389
LIN9	0.012462	0.258982	0.409246
C8orf59	0.0124676	0.258982	0.420827
UBE2F	0.0124681	0.258982	0.394344
ARL6IP6	0.0124793	0.258982	0.284886
MRPL1	0.0125471	0.258982	0.475639
RTEL1P1	0.0125572	0.258982	-0.802507
LINC00649	0.0125669	0.258982	-0.521702
TFDP2	0.0126042	0.258982	0.463233
RPL22L1	0.0126088	0.258982	0.804775
P4HA2	0.012623	0.258982	0.850762
ANKRD32	0.0126291	0.258982	0.28225
RPL9	0.0126673	0.258982	0.754102
PTTG2	0.0126765	0.258982	-0.739652
HIST1H4J	0.0126866	0.258982	0.680135
TXNL1	0.0126976	0.258982	0.274568
MAP3K7CL	0.0127009	0.258982	-0.656166
EIF1	0.0127149	0.258982	0.367861
HSD11B1	0.0127468	0.258982	1.56178
DNAH1	0.0127594	0.258982	-0.376297
SURF4	0.0127675	0.258982	0.396439
ZNF609	0.0127688	0.258982	-0.377301
CLEC7A	0.0128085	0.258982	-0.761817
NBPF8P	0.0128107	0.258982	-0.413434
RNF11	0.0128297	0.258982	0.745405
NAA50	0.0128718	0.259405	0.246431
MYCL	0.0129025	0.259597	-0.84979
PAIP1	0.0129682	0.260491	0.330439
RPS2	0.0130322	0.261016	0.375687
UGP2	0.013037	0.261016	0.330522
PLCG1	0.0130851	0.261282	-0.351365
ZNF654	0.0130929	0.261282	0.314543
PIK3R6	0.013124	0.261426	-0.647851
DDAH2	0.0131428	0.261426	0.466589
HIST2H3D	0.0131876	0.261892	0.62548
DBI	0.013287	0.263154	0.586625
LCP2	0.0133161	0.263154	-0.397556
STAC3	0.0133315	0.263154	-0.516784
AC005082.12	0.0133412	0.263154	0.916846
KCTD9	0.0133908	0.263154	0.273378
STRAP	0.0134147	0.263154	0.288548
UBL4A	0.0134164	0.263154	0.397471
GLTP	0.0134856	0.263154	0.297431
TCF20	0.013486	0.263154	-0.280552
RPL13A	0.0135177	0.263154	0.338243
RNF217	0.013519	0.263154	0.472436
AC006042.8	0.0135268	0.263154	-0.518023
SNX29	0.0135466	0.263154	-0.318606
SNHG8	0.0135645	0.263154	0.50157
ESR1	0.0135733	0.263154	-0.546486
RPL13AP5	0.0136054	0.26336	0.466207
ATP6V1C1	0.0136453	0.263632	0.360771
C11orf58	0.0136673	0.263632	0.323717
BTN2A2	0.013684	0.263632	-0.451905
PPP3CB-AS1	0.0137227	0.263962	-0.379698
B3GNT2	0.0137522	0.264109	0.335521
SDC2	0.0137734	0.264109	1.1068
SELT	0.013876	0.265372	0.382662
RP11-295D4.3	0.0138826	0.265372	-0.675847
ATG16L2	0.0139287	0.265481	-0.569848
STK4	0.0139316	0.265481	-0.232653
HPRT1	0.0139676	0.265753	0.370027
DCUN1D4	0.0140715	0.266559	0.269792
RPTOR	0.0140843	0.266559	-0.421118
NDUFB1	0.0140957	0.266559	0.715939
RP5-1115A15.1	0.014097	0.266559	-0.778558
C2orf69	0.0141723	0.266764	0.274911
TNFRSF10A	0.0141737	0.266764	0.386508
BEND4	0.0141787	0.266764	0.689222
PDSS1	0.0142325	0.266764	0.564562
C6orf62	0.0142345	0.266764	0.225509
MAPK13	0.0142703	0.266764	-0.56768
CROT	0.0142727	0.266764	-0.298153
RAB6B	0.014282	0.266764	1.15398
ACER3	0.0144501	0.269273	0.329637
HIGD1A	0.0145125	0.269273	0.522086
XPC	0.0145131	0.269273	-0.302001
RPGRIP1	0.0145133	0.269273	-0.883764
SHKBP1	0.0145262	0.269273	-0.377479
GLRX2	0.0145539	0.26938	0.471586
CXCL5	0.0146201	0.269798	-1.08416
COPS2	0.0146206	0.269798	0.367216
ALCAM	0.0146895	0.269898	0.419426
PLIN3	0.014731	0.269898	0.345437
H2AFX	0.0147312	0.269898	0.668306
UGDH	0.014734	0.269898	0.41301
RP11-466H18.1	0.0147361	0.269898	0.902392
RAB32	0.0147638	0.270002	0.376455
TIAM1	0.0148049	0.27035	-0.417146
RP11-452H21.1	0.0148499	0.270466	1.01746
PPARG	0.0148685	0.270466	0.842652
LRR1	0.0148775	0.270466	0.36519
LINC00877	0.0149579	0.271169	-0.678989
C11orf73	0.0149969	0.271169	0.337409
CMB9-22P13.1	0.0150253	0.271169	0.633943
CITED2	0.0150624	0.271169	0.378456
SERPINH1	0.0150632	0.271169	1.41497
RPS6	0.0150648	0.271169	0.524316
ABCA2	0.0150938	0.271169	-0.578935
MTDH	0.0151223	0.271169	0.307501
WDR25	0.0151245	0.271169	-0.378148
RPS23	0.0151463	0.271169	0.542146
MT1E	0.0151596	0.271169	0.906542
PSMB5	0.015267	0.272691	0.461515
FABP5	0.0153027	0.272877	0.666124
RP11-54A4.2	0.0153219	0.272877	-0.890716
AMICA1	0.0153596	0.273002	-0.454706
ACN9	0.0153901	0.273002	0.428677
RPS24	0.0154344	0.273002	0.63505
FGFR1OP2	0.015487	0.273002	0.343034
FAM102B	0.0154992	0.273002	0.266841
NDC1	0.0155001	0.273002	0.256498
BTBD3	0.0155115	0.273002	0.325661
ATL1	0.0155133	0.273002	0.428563
FEM1B	0.0155295	0.273002	0.201951
CCRL2	0.0155664	0.27326	0.783932
RNF14	0.0156231	0.273863	0.587344
CDK2	0.0156534	0.274001	0.35891
GAB2	0.0157	0.27405	-0.504756
RN7SKP80	0.0157188	0.27405	-2.13562
TMEM242	0.0157233	0.27405	0.272282
AQP1	0.0157902	0.274626	1.12784
CD164	0.0158012	0.274626	0.262177
HIST1H4B	0.0159195	0.275345	0.636518
RRAGA	0.0159223	0.275345	0.359567
CTSL	0.0159426	0.275345	0.816684
LINC01001	0.0159618	0.275345	-0.878757
HHEX	0.0159772	0.275345	0.409563
EEF1E1	0.0159773	0.275345	0.434013
APOL2	0.0160066	0.275461	-0.541178
RPL19	0.0160678	0.275756	0.358973
HGF	0.0160687	0.275756	0.75788
SMIM19	0.0161024	0.275947	0.432288
SLCO4C1	0.0161676	0.276423	0.495944
USP14	0.0162411	0.276423	0.272915
TBL1XR1	0.0162628	0.276423	0.263704
G0S2	0.0162775	0.276423	1.18057
IFNGR1	0.0163207	0.276423	0.37308
DAK	0.0163537	0.276423	-0.440041
SCYL2	0.0163622	0.276423	0.211606
IDI2-AS1	0.0163707	0.276423	0.787157
RP4-814D15.2	0.0164005	0.276423	-0.474176
FKBP3	0.0164244	0.276423	0.356206
CHEK2	0.0164397	0.276423	0.294668
SECTM1	0.0164731	0.276423	-0.560174
RAB10	0.016495	0.276423	0.253759
PRUNE2	0.0164958	0.276423	1.20873
SLC45A4	0.0165201	0.276423	-0.456529
ZNF66	0.0165221	0.276423	-0.428384
SIKE1	0.0165225	0.276423	0.205436
SGTB	0.0165647	0.276423	0.41159
ZNF22	0.0165692	0.276423	0.355352
SKA3	0.0165813	0.276423	0.533285
SLC7A11	0.0166656	0.277451	0.703948
CDC27	0.0167168	0.277663	0.245224
COX7A2L	0.0167423	0.277663	0.34239
NENF	0.0167464	0.277663	0.428912
MYBPC3	0.0168691	0.27932	-0.492092
LAPTM4B	0.0169203	0.279775	0.838111
IL13RA1	0.0169424	0.279775	-0.417577
GSTCD	0.016965	0.279775	0.28649
PCMT1	0.0170577	0.280862	0.365066
ITGAV	0.0170768	0.280862	0.275924
CTB-31N19.3	0.0171234	0.281251	0.511312
RORA	0.0171958	0.282062	-0.329402
ZNF850	0.0172744	0.282655	0.424719
CYP2R1	0.0172781	0.282655	0.325154
SLC36A4	0.0173477	0.283416	0.436276
UTRN	0.0173985	0.283758	-0.492954
RP11-174G6.5	0.017415	0.283758	-0.429308
AC253572.1	0.0175273	0.285209	-0.988717
BTN3A2	0.0175682	0.285494	-0.480824
RANBP6	0.0177268	0.287691	0.30437
PQLC1	0.0177874	0.288292	0.496228
CEACAM6	0.0179492	0.290518	1.20333
HAVCR2	0.0180123	0.290518	0.510672
AATBC	0.0180143	0.290518	-0.942291
RALA	0.0180196	0.290518	0.264508
TRAJ33	0.0181057	0.291407	-0.680117
ELMO1	0.0181223	0.291407	-0.304731
DENND2C	0.0181477	0.291433	0.716366
CLEC4D	0.0181843	0.29164	0.687349
TUBB4B	0.0183162	0.29337	0.433381
TIMM44	0.018352	0.293423	0.42361
GID8	0.0183729	0.293423	0.341607
RP11-449P15.2	0.0184289	0.293423	-0.680399
RPL10A	0.0184677	0.293423	0.368189
CEP164	0.0184792	0.293423	-0.347991
TRDV3	0.0184799	0.293423	1.09632
NIPA2	0.018492	0.293423	0.239938
RN7SK	0.0185614	0.293423	0.626041
BEND2	0.0185675	0.293423	-0.913327
GTDC1	0.0185989	0.293423	0.304607
RPS25	0.0185999	0.293423	0.480728
PI3	0.0186069	0.293423	2.04801
CGRRF1	0.0186599	0.293593	0.286811
DYNC1I2	0.0186657	0.293593	0.207743
HIST1H2BL	0.0187157	0.293593	0.63241
DCTN4	0.0187267	0.293593	0.197346
HIVEP3	0.0187374	0.293593	-0.562607
RP11-290D2.6	0.018782	0.29373	0.788417
FBXO31	0.0188357	0.29373	-0.397172
PSMB8-AS1	0.0188362	0.29373	-0.271628
RN7SKP97	0.0188421	0.29373	0.681901
RCSD1	0.0188723	0.293827	-0.271204
RPS3AP6	0.0191213	0.297067	0.652592
TXNDC9	0.0191289	0.297067	0.331432
HMBS	0.0191603	0.297178	0.762708
SVIP	0.0191863	0.297206	0.47514
RP3-465N24.5	0.0192343	0.297525	-0.73288
KBTBD7	0.0192555	0.297525	0.437203
CPNE3	0.0193314	0.297736	0.349144
ZBED2	0.0193588	0.297736	0.834955
TNIK	0.0193635	0.297736	-0.352612
CRISP2	0.0193811	0.297736	1.16264
UBE3A	0.0193906	0.297736	0.187427
ERAP2	0.0194184	0.297742	-0.720489
RP11-504I13.2	0.0194396	0.297742	-0.862685
CSF1R	0.0195811	0.299432	-0.588766
HIST1H4I	0.0195988	0.299432	0.589525
NOD2	0.0196988	0.299758	-0.621393
SLC30A6	0.0197051	0.299758	0.175897
CDK1	0.0197163	0.299758	0.558149
SETD3	0.0197349	0.299758	0.275009
LILRA1	0.0197451	0.299758	-0.615381
DOCK5	0.0198041	0.299758	-0.471955
EHD4	0.0198626	0.299758	0.419251
AK4	0.0199072	0.299758	0.749141
CYB561	0.0199366	0.299758	-0.591066
AP1G2	0.0199391	0.299758	-0.303103
BIN3	0.0199631	0.299758	-0.249425
TXN2	0.01998	0.299758	0.479358
NRAS	0.0200029	0.299758	0.288147
PCNP	0.0200617	0.299758	0.215769
CMTM4	0.0201363	0.299758	0.411096
CD163L1	0.020152	0.299758	0.737987
VNN1	0.0202103	0.299758	0.673343
SP140L	0.0202105	0.299758	-0.371297
ELF2	0.0202114	0.299758	-0.250004
MINPP1	0.0202194	0.299758	0.487402
S1PR1	0.0202284	0.299758	0.351304
RAD1	0.0202331	0.299758	0.239096
RANBP9	0.0202394	0.299758	0.302342
ENO1	0.0202486	0.299758	0.441282
LMF2	0.0202533	0.299758	-0.40091
RBP7	0.0202563	0.299758	-0.791969
IGHG2	0.0203599	0.300571	1.2054
LINC01278	0.0203602	0.300571	-0.487077
MYL6	0.0204699	0.301534	0.499582
SFT2D1	0.0204747	0.301534	0.224394
LPAR2	0.0205243	0.301903	-0.589783
RPL12	0.0206058	0.302737	0.370357
JOSD1	0.0206934	0.30366	0.387335
UBAC1	0.0207541	0.304187	0.460248
RP11-327F22.6	0.020797	0.304225	-0.721927
HLA-C	0.0208413	0.304225	-0.492412
MCOLN2	0.0208691	0.304225	-0.417003
GPR114	0.0209312	0.304225	-0.517064
RERE	0.0209315	0.304225	-0.477976
ANLN	0.020934	0.304225	0.596091
ZNF687	0.0209828	0.304225	-0.389699
UBE2H	0.0210156	0.304225	0.508565
GPR97	0.0210165	0.304225	0.424445
MLLT6	0.0210231	0.304225	-0.429118
RUNX2	0.0210346	0.304225	-0.428345
ITPKB-IT1	0.0210547	0.304225	-0.617563
RP11-326C3.11	0.0211893	0.305644	0.634241
MPPE1	0.021203	0.305644	-0.320807
KANK2	0.0212277	0.305644	1.13085
TRIM13	0.0212632	0.305796	0.241543
ARF1	0.0213267	0.306232	0.274354
PAQR3	0.0213773	0.306232	0.277042
LSP1	0.0213934	0.306232	-0.355133
MT1G	0.0213949	0.306232	1.47008
MAP2K6	0.0214185	0.306232	0.443777
RNF7	0.0214441	0.30624	0.28616
KLHL2	0.021504	0.306415	0.226125
DOCK2	0.0215294	0.306415	-0.250239
TMED2	0.0215464	0.306415	0.407221
NEK2	0.0215612	0.306415	0.538772
SP100	0.0215884	0.306415	-0.301884
HPSE	0.0216063	0.306415	0.720615
UQCR11	0.0217026	0.307424	0.467155
NUF2	0.021761	0.307896	0.519448
PDCD10	0.0218059	0.307966	0.399351
POR	0.0218179	0.307966	0.327012
DLGAP1-AS2	0.0218414	0.307966	-0.475904
UPF1	0.0218982	0.308412	-0.29071
LINC00671	0.0220015	0.309073	0.918923
CPM	0.0220666	0.309073	0.534277
LINC01138	0.022131	0.309073	-0.519779
STAG3L5P	0.0221826	0.309073	-0.420882
HIST1H2BF	0.0221864	0.309073	0.452577
TRGC2	0.0221902	0.309073	0.587988
DPY19L3	0.0222	0.309073	0.393055
SLC38A2	0.0222187	0.309073	0.286218
COPS4	0.0222942	0.309073	0.361035
LDB1	0.022305	0.309073	-0.265168
MAP2K1	0.0223072	0.309073	0.274118
TDRD12	0.0223669	0.309073	1.23463
SETD4	0.0223749	0.309073	-0.325965
MIR222HG	0.0223881	0.309073	0.617065
CHMP1A	0.0224059	0.309073	0.311431
ATP6AP2	0.0224135	0.309073	0.315048
RPL3	0.022431	0.309073	0.368126
MYEOV2	0.0224376	0.309073	0.545837
LIN7A	0.0224437	0.309073	0.407023
MRPL13	0.02248	0.309073	0.440774
PAG1	0.0224906	0.309073	0.292659
SRI	0.0225	0.309073	0.323724
CCDC126	0.022688	0.310653	0.387092
MRPL50	0.0226979	0.310653	0.289065
TRAJ10	0.0227015	0.310653	-0.484044
XPO7	0.0227165	0.310653	0.484318
SSBP3	0.022744	0.310682	-0.439958
STYK1	0.0227965	0.310871	0.721284
CTD-2353F22.1	0.0228086	0.310871	-0.376972
SEPW1	0.0228641	0.31111	0.533765
EEF1B2	0.0228928	0.31111	0.643794
RP5-1039K5.19	0.0229023	0.31111	-0.43266
OTUD1	0.022935	0.311211	0.422099
ALDH8A1	0.0230277	0.31141	-0.568451
FAM188A	0.0230473	0.31141	0.315654
ABCG1	0.0230608	0.31141	-0.750134
TSPAN2	0.0230655	0.31141	0.658441
RRN3P2	0.0230768	0.31141	-0.344959
PRMT9	0.0231082	0.311455	0.219979
AKAP12	0.0231538	0.311455	-0.892815
COA1	0.0231564	0.311455	-0.335132
ALDOA	0.0232648	0.31257	0.322427
RP11-391L3.3	0.0233281	0.313077	-0.725005
SLC25A40	0.0233716	0.31326	0.523386
PHYKPL	0.0234044	0.31326	-0.348205
PPA2	0.0234654	0.31326	0.363451
DPH7	0.0234777	0.31326	-0.252354
TIPIN	0.0235148	0.31326	0.455475
NUSAP1	0.0235164	0.31326	0.483692
AC011747.4	0.0235207	0.31326	-0.682236
POLM	0.0236213	0.313964	-0.355944
CRYZ	0.0236248	0.313964	0.507336
NOL4L	0.0237022	0.314651	-0.454663
MAGT1	0.0237618	0.315071	0.350896
LRRC4	0.0237853	0.315071	-0.467303
RP1-29C18.8	0.0238243	0.315247	-0.676103
ARL2BP	0.0238784	0.315602	0.26148
TMEM140	0.0239026	0.315602	-0.393775
UBE2A	0.0239965	0.316443	0.308093
GLO1	0.024018	0.316443	0.29269
PHLDA1	0.0240586	0.316638	0.636493
CBFA2T3	0.0241676	0.316724	-0.727847
PSMD6-AS2	0.0241718	0.316724	-0.507267
RBX1	0.0241833	0.316724	0.470818
NDNL2	0.0241989	0.316724	0.319858
MPEG1	0.0242134	0.316724	-0.486498
ZNF350	0.0242202	0.316724	-0.260229
RP11-57K17.1	0.0243211	0.317318	-0.443904
STAT2	0.0243626	0.317318	-0.545499
AIDA	0.0244082	0.317318	0.407232
CHCHD2	0.0244091	0.317318	0.407736
ZC3H4	0.0244235	0.317318	-0.332429
MED30	0.0244425	0.317318	0.337413
TSPAN3	0.024447	0.317318	0.30525
XRCC6BP1	0.0245004	0.317512	0.39926
TRAF7	0.0245305	0.317512	0.332108
RPL7A	0.0245504	0.317512	0.348547
ATPIF1	0.0245726	0.317512	0.458095
STAM	0.0246143	0.317512	0.230933
SPON2	0.0246174	0.317512	-0.466408
TCF3	0.0246582	0.317705	0.471662
TAL1	0.0247711	0.318824	0.802752
RP13-270P17.1	0.0248523	0.318931	0.415006
PSMD12	0.024882	0.318931	0.250046
LSM5	0.0249264	0.318931	0.518798
GPR183	0.0249431	0.318931	0.351594
GID4	0.0249543	0.318931	0.660993
C15orf39	0.0249599	0.318931	-0.681823
EEPD1	0.0249869	0.318931	-0.522443
SLC16A3	0.0249893	0.318931	0.279242
TDG	0.0250161	0.318931	0.260448
AC130469.1	0.0250397	0.318931	-0.458938
LRRC40	0.0251717	0.319996	0.279615
DESI2	0.0251756	0.319996	0.20341
TOMM7	0.0252665	0.320429	0.601074
GAR1	0.0253089	0.320429	-0.386355
STRN3	0.0253723	0.320429	0.230264
C1orf122	0.0253809	0.320429	0.4994
SLCO4A1	0.0253916	0.320429	0.842717
RFX3-AS1	0.0254037	0.320429	-0.532326
POGK	0.0254116	0.320429	0.197008
ZNF137P	0.0254263	0.320429	-0.396022
HIST1H1C	0.025445	0.320429	0.410981
CD38	0.0255805	0.321371	-0.400479
TNIP3	0.0255982	0.321371	1.24182
TRAJ12	0.0256221	0.321371	-0.422635
MAP4K5	0.0256247	0.321371	0.344668
MIATNB	0.0258148	0.323178	-0.427501
CCNB1	0.0258251	0.323178	0.51029
MRPL47	0.0258479	0.323178	0.432098
ACP5	0.026064	0.325547	0.696335
ITSN1	0.0261996	0.326027	0.538031
CD83	0.0262153	0.326027	0.740046
HAUS1	0.0262283	0.326027	0.392684
PHF6	0.0262565	0.326027	0.23966
FBXO9	0.0262666	0.326027	0.307115
ESD	0.0262841	0.326027	0.241459
CCDC146	0.0262887	0.326027	-0.499971
TSPAN13	0.026337	0.326296	0.417829
CCDC51	0.0263654	0.326319	0.413466
CACYBP	0.0264458	0.326984	0.664698
HIST1H3J	0.0267057	0.329863	0.584942
RP11-151A6.4	0.0268531	0.331351	-0.455726
APOBEC3A	0.0269606	0.332342	-0.297517
RP11-181E10.3	0.0270139	0.332575	-0.590127
RP11-353N4.6	0.0270338	0.332575	-0.619831
HSDL1	0.0270987	0.332653	0.275696
RP11-196G18.22	0.0271299	0.332653	-0.385848
SLC25A14	0.0271682	0.332653	-0.295265
NPRL2	0.0271903	0.332653	-0.290627
GNPDA1	0.0271971	0.332653	0.41719
IGLL5	0.0272267	0.332653	-0.753879
CTD-2547L24.3	0.0272655	0.332653	-0.640324
COPB1	0.0272934	0.332653	0.207219
RP11-120K19.3	0.0273053	0.332653	-0.589213
AC147651.4	0.0273116	0.332653	0.744144
BSDC1	0.0274027	0.333431	0.229617
SMCHD1	0.027511	0.333928	-0.416514
GRK6	0.027514	0.333928	0.264212
ORC2	0.0275572	0.333928	-0.248705
CCNE2	0.0275796	0.333928	0.458732
H19	0.0275798	0.333928	1.19085
DCUN1D5	0.0276927	0.334964	0.366385
PCED1A	0.0278306	0.335938	-0.417187
ITM2B	0.0278434	0.335938	-0.354291
ADAMDEC1	0.0278555	0.335938	0.751988
AHI1	0.0279599	0.336866	0.311956
NDUFA5	0.0279905	0.336903	0.438275
TCP11L2	0.0280313	0.337063	0.47106
RPS3A	0.0281939	0.338686	0.572403
TFR2	0.028261	0.338914	1.07273
HIVEP2	0.0282813	0.338914	-0.373494
DRAM1	0.0283134	0.338914	0.427702
HIST1H2AG	0.028351	0.338914	0.475453
RN7SL239P	0.0283512	0.338914	-0.523111
USMG5	0.0284103	0.33929	0.561307
TNRC6C-AS1	0.0284456	0.33938	-0.436797
MX2	0.0284935	0.339621	-0.535386
SERP1	0.0285633	0.340104	0.332175
CAMK2G	0.028601	0.340104	-0.435889
C6orf48	0.0286569	0.340104	0.350189
ZNF235	0.0286821	0.340104	-0.241733
ATP9A	0.0287032	0.340104	0.749514
RP11-597D13.9	0.028711	0.340104	-0.695602
NDUFA6	0.0287283	0.340104	0.480906
MTG2	0.028774	0.340125	-0.300997
SLAMF1	0.0287856	0.340125	-0.360592
RPL37A	0.0289377	0.341593	0.34292
ERO1L	0.0290087	0.342102	0.275054
MYCBP2	0.0290656	0.342271	-0.355795
HSP90AA1	0.029083	0.342271	0.9609
PFDN4	0.0291068	0.342271	0.707671
TMC8	0.0292438	0.343227	-0.443298
WDR86-AS1	0.0292702	0.343227	-0.785017
SPECC1L	0.0292819	0.343227	0.372445
ECT2	0.0293002	0.343227	0.324246
PHACTR1	0.0293626	0.343402	0.807977
CACNB4	0.0293712	0.343402	-0.535878
SDHAF1	0.0294515	0.344012	0.373692
PRKCZ	0.0295513	0.344298	-0.379431
HIST1H2AB	0.0295893	0.344298	0.589221
TMEM14C	0.0296031	0.344298	0.499979
DIP2B	0.0296218	0.344298	-0.247559
LINC01128	0.0296281	0.344298	0.284309
ZNF652	0.0296668	0.344298	-0.451269
THAP1	0.0296726	0.344298	0.26033
RP1-5O6.6	0.0298719	0.346108	-0.589174
RPL3P4	0.0299308	0.346108	1.00252
CPOX	0.0299763	0.346108	0.305429
HIST1H2AJ	0.0300518	0.346108	0.606617
NLRP1	0.0300555	0.346108	-0.534064
NUCB2	0.0300692	0.346108	0.34837
RP11-299A16.1	0.0300712	0.346108	0.5942
ZNF257	0.0300748	0.346108	0.643016
RP11-358B23.7	0.0300828	0.346108	-0.326347
SEMA4D	0.0301623	0.346164	-0.506228
LRMP	0.0302006	0.346164	-0.291723
TSG101	0.0302332	0.346164	0.210206
CAD	0.0302909	0.346164	-0.346851
BCL2L2	0.0303047	0.346164	0.260171
TBC1D1	0.0303051	0.346164	-0.261692
ITPKC	0.0303257	0.346164	0.384058
HIST2H2AB	0.0303638	0.346164	0.461102
TMCO3	0.0304097	0.346164	0.383679
TCEB1	0.0304235	0.346164	0.336214
PBX2	0.0304303	0.346164	-0.297419
SEPSECS-AS1	0.0304504	0.346164	-0.621586
RP11-44F14.2	0.0304675	0.346164	-1.03448
NEDD4L	0.0305034	0.346164	0.512561
COX7A2	0.0305115	0.346164	0.471057
MACC1	0.0305647	0.346447	0.413205
GOLGB1	0.0306214	0.34649	-0.237694
PLEKHB2	0.0306652	0.34649	0.216829
FAU	0.0306953	0.34649	0.43474
SRGN	0.0307465	0.34649	0.31227
ZNF18	0.0307675	0.34649	-0.29318
TTK	0.0308417	0.34649	0.499079
RP13-104F24.2	0.0308682	0.34649	-0.521897
HSD17B12	0.030869	0.34649	0.372681
SAMD4A	0.0308706	0.34649	-0.788663
RP11-43D4.3	0.0309593	0.34649	-0.748976
ZCCHC2	0.0309691	0.34649	-0.471612
ZMYM5	0.0309744	0.34649	0.239732
SEMA4C	0.030989	0.34649	-0.485933
GZMH	0.0310523	0.34649	-0.356423
PSMB9	0.0310589	0.34649	-0.349908
AHSP	0.0310642	0.34649	1.19877
EEF1D	0.0310724	0.34649	0.292985
ABI3	0.0310775	0.34649	-0.492941
SUMO2	0.031138	0.346849	0.356867
ANKRD44-IT1	0.0312564	0.347665	-0.68166
IL1RAP	0.0312772	0.347665	0.498272
CD300LB	0.0312964	0.347665	-0.557434
KIF13A	0.0314554	0.348869	-0.347376
MIR17HG	0.0314617	0.348869	0.307826
CMPK1	0.0315054	0.349037	0.222568
BMX	0.0316833	0.350416	0.547896
CYP1B1	0.0317484	0.350416	0.593768
SNN	0.031765	0.350416	-0.396801
TCF3P1	0.0317883	0.350416	-0.858008
ZNF213-AS1	0.0318265	0.350416	-0.346586
HMMR	0.0318363	0.350416	0.647587
SRP9	0.0318477	0.350416	0.372864
SNRPF	0.0318586	0.350416	0.382191
TNFRSF13B	0.0319294	0.350565	-0.413073
PADI4	0.0319463	0.350565	0.651935
TUBB6	0.0319855	0.350565	0.559648
TNIP2	0.0319905	0.350565	0.318139
RP11-483E17.1	0.0320152	0.350565	-0.75366
AAED1	0.0320498	0.35063	0.450181
AF131215.9	0.0320964	0.350827	-0.403363
SNRPE	0.0322109	0.351765	0.556381
LINC01059	0.0322816	0.351842	-1.03107
XRCC4	0.0322956	0.351842	0.420717
COX5A	0.0323174	0.351842	0.370845
PYHIN1	0.0323424	0.351842	-0.376927
P3H1	0.0323615	0.351842	-0.29202
PSPH	0.0324876	0.352612	0.435394
NMT2	0.0325099	0.352612	-0.304267
TMED8	0.0325187	0.352612	0.259454
CASP8	0.0325531	0.352673	-0.244059
HIST3H2BB	0.0326094	0.352971	0.569468
FAM46C	0.0326899	0.35353	0.878086
TRAJ22	0.032731	0.353662	-0.402863
HCG18	0.032851	0.354034	-0.314438
RPL4	0.0328832	0.354034	0.271986
PBX1	0.0328873	0.354034	0.663228
TAF7	0.03292	0.354034	0.289667
ARMCX6	0.0329627	0.354034	0.36678
ARHGAP5	0.0329677	0.354034	0.327502
NAA20	0.0330113	0.354034	0.293915
ADA	0.0330356	0.354034	-0.413822
RNF214	0.0330387	0.354034	-0.383355
TRDV1	0.0330841	0.354034	1.03985
CMC1	0.0330907	0.354034	0.382533
MTERF4	0.0331121	0.354034	-0.209322
UQCR10	0.0332222	0.354665	0.43744
CLEC1A	0.033229	0.354665	-0.794405
CDAN1	0.0333544	0.35485	-0.374424
SCARNA2	0.0334299	0.35485	0.538957
BCAP29	0.0335046	0.35485	0.25427
GZMB	0.0335111	0.35485	0.565528
CENPE	0.0335176	0.35485	0.479502
CYP4V2	0.0335191	0.35485	-0.344694
CENPW	0.0335484	0.35485	0.573521
TGM2	0.033569	0.35485	0.694085
CBWD5	0.0335717	0.35485	0.331604
TFB2M	0.0335857	0.35485	0.30474
CAMSAP2	0.0335931	0.35485	0.407864
RP11-95D17.1	0.0336054	0.35485	-0.38669
KATNA1	0.0336228	0.35485	0.229389
TMC6	0.0336735	0.355079	-0.256839
JUN	0.0337365	0.355128	0.614451
SRRM2	0.0337939	0.355128	-0.547543
CCL3L3	0.0338046	0.355128	1.13036
NECAB1	0.0338121	0.355128	1.15185
LATS2	0.0339008	0.355128	0.326345
LZTFL1	0.0339153	0.355128	0.290464
MS4A4A	0.0339317	0.355128	0.610441
AGPAT6	0.0339584	0.355128	0.349532
RP11-582J16.5	0.0339617	0.355128	-0.365654
AC116366.5	0.0339919	0.355128	-0.486184
SMYD4	0.033997	0.355128	-0.218376
RP11-196G18.3	0.0340517	0.355396	-0.562007
AC004381.6	0.0340969	0.355491	0.44581
INHBA	0.0341188	0.355491	0.988179
TMED5	0.0341821	0.355713	0.240887
CTC-490G23.4	0.0341981	0.355713	1.36838
AC067945.3	0.0342724	0.356183	-0.80571
POLR2J3	0.0343797	0.356641	-0.486362
RP11-775J23.2	0.0343915	0.356641	-0.66848
DHX57	0.0344038	0.356641	-0.236557
ZNF304	0.0345568	0.357925	-0.320245
FNBP4	0.0346228	0.358305	-0.217892
DMC1	0.0346849	0.358645	0.588821
CTD-2521M24.9	0.034745	0.358938	-0.456897
IFT20	0.0347857	0.358938	0.465263
DYNC2H1	0.0348011	0.358938	0.375749
EML3	0.0348576	0.359007	-0.347459
SNHG7	0.0348664	0.359007	0.367101
LINC01268	0.0349274	0.359333	0.919056
SFI1	0.0350293	0.360067	-0.321684
PLEKHF1	0.0350761	0.360067	-0.393344
OSTC	0.035087	0.360067	0.411844
RP11-423H2.1	0.0351495	0.360157	-0.516912
HLA-E	0.0351545	0.360157	-0.263203
XKR3	0.0352199	0.360526	-0.929086
EPSTI1	0.0353114	0.361161	-0.560813
CTD-3222D19.8	0.0354154	0.361852	-0.271476
JAZF1	0.035453	0.361852	0.620955
CMSS1	0.0354675	0.361852	0.309885
ERCC6	0.0355455	0.362183	-0.227433
TIMM10	0.0355591	0.362183	-0.76479
FAM132B	0.0357256	0.363493	2.038
SF3B6	0.0357901	0.363493	0.462616
C5orf56	0.0357958	0.363493	-0.60852
RPS19BP1	0.0358737	0.363493	0.348778
SCRN1	0.0358978	0.363493	-0.281388
USP19	0.0359848	0.363493	-0.267311
RNF213	0.036	0.363493	-0.569251
ZMPSTE24	0.0360212	0.363493	0.224572
SCARF1	0.0360286	0.363493	-0.603478
FAM129B	0.0360507	0.363493	0.447358
GBA	0.0360642	0.363493	0.440849
ZNFX1	0.0360664	0.363493	-0.307225
TRIM39	0.0361027	0.363493	-0.245323
ARRDC4	0.0361097	0.363493	0.644105
AGTPBP1	0.0361468	0.363493	0.277184
UBE2K	0.0361624	0.363493	0.186349
TNRC18	0.0362114	0.363687	-0.451353
RPL41	0.0363148	0.363789	0.46046
MGAT2	0.0363281	0.363789	0.342126
RP11-1094M14.7	0.0363344	0.363789	-0.581536
PDPR	0.0363563	0.363789	-0.561002
DDX49	0.0364123	0.363789	0.311932
GCNT1	0.0364434	0.363789	0.305494
PTGES3	0.0364541	0.363789	0.402297
TGFBI	0.036459	0.363789	-0.629269
NAPSB	0.0365043	0.363905	-0.363736
ZDHHC3	0.0365362	0.363905	0.276851
RP11-124N14.3	0.0365691	0.363905	0.617734
ITPR3	0.0366125	0.363905	-0.316767
KIAA0101	0.0366453	0.363905	0.551441
SLC2A5	0.0366488	0.363905	0.719377
CCDC127	0.0367042	0.364159	0.280058
TYMP	0.0367941	0.36453	-0.356363
WWOX	0.036801	0.36453	-0.322035
ALG10B	0.0368484	0.364605	0.247426
NDUFB9	0.0368682	0.364605	0.405275
FLOT1	0.0369524	0.36471	0.359812
ULK4	0.0369758	0.36471	-0.305738
JMJD6	0.0369783	0.36471	0.36025
GPX4	0.037041	0.36471	0.52855
CDK4	0.0370668	0.36471	0.399422
STAT1	0.0370735	0.36471	-0.389557
B4GALT5	0.0371036	0.36471	0.329798
MBD6	0.0371169	0.36471	-0.575328
GLMN	0.0372707	0.365763	0.211901
NQO2	0.0373271	0.365763	0.391577
NRIP1	0.0373371	0.365763	0.22154
CCDC149	0.0373434	0.365763	-0.598365
ZNF770	0.0374401	0.366416	0.255912
RPS9	0.0375567	0.36671	0.417963
ATF1	0.0375576	0.36671	0.227996
DCTPP1	0.0375672	0.36671	0.422352
IRF1	0.0376163	0.36671	-0.292585
SBDS	0.0376197	0.36671	0.344546
TECPR2	0.0376991	0.367191	-0.314529
SEL1L3	0.0377489	0.367384	0.297562
TUBA1B	0.0378174	0.367636	0.354639
CTSS	0.0378348	0.367636	-0.314948
AMY2B	0.0379214	0.368186	-0.354264
LAMTOR5	0.0380127	0.36878	0.363356
FANCA	0.0380433	0.368785	-0.38482
SH2D3C	0.0381913	0.369731	-0.308807
SLC9A6	0.0382022	0.369731	0.238422
HIST1H2AL	0.0382351	0.369731	0.529508
AIP	0.0382615	0.369731	0.452854
DECR1	0.0385	0.371373	-0.220921
SOD1	0.0385055	0.371373	0.421352
RNU1-1	0.0385224	0.371373	0.90217
ZC3H3	0.038638	0.372195	-0.611488
RAD51-AS1	0.0386916	0.372418	-0.239246
NCOA4	0.038778	0.372675	0.733136
DDA1	0.0387924	0.372675	0.33493
IFFO1	0.0388374	0.372675	-0.400857
RP4-620F22.2	0.0388692	0.372675	-0.907359
JUND	0.0388704	0.372675	0.546464
AMPD2	0.0390272	0.37343	-0.397143
SIMC1	0.039032	0.37343	-0.363121
NFAM1	0.0390652	0.37343	-0.43222
SUMO1	0.039071	0.37343	0.280082
ERV3-1	0.0391527	0.373639	-0.537097
RPL8	0.0391706	0.373639	0.323172
RP11-553P9.1	0.0391844	0.373639	-2.48188
IGF2R	0.0392448	0.37383	-0.433415
TNFAIP2	0.0392654	0.37383	-0.454575
TVP23C	0.0394364	0.374798	-0.456446
RN7SL683P	0.0395219	0.374798	-0.959337
SP110	0.0395513	0.374798	-0.445208
OLA1	0.0395628	0.374798	0.225077
PBXIP1	0.0395849	0.374798	-0.35813
KBTBD8	0.0396314	0.374798	0.324216
TRMT10A	0.0396359	0.374798	0.371585
AMOTL1	0.0396846	0.374798	0.759457
C5orf15	0.0397222	0.374798	0.295803
ATP10A	0.0397372	0.374798	-0.341227
PPP2R5C	0.0397599	0.374798	-0.182672
HYAL2	0.039775	0.374798	0.494808
PTX3	0.0398264	0.374798	0.921823
AZIN1	0.0398701	0.374798	0.302652
LINC01410	0.0399047	0.374798	0.739392
RP11-473M20.9	0.0399505	0.374798	-0.670718
PANK3	0.0399531	0.374798	0.233143
CLIC1	0.0399567	0.374798	0.34436
GYS1	0.0399986	0.374798	0.394596
COX17	0.0400053	0.374798	0.340845
HDC	0.0400095	0.374798	-1.08342
NR1D2	0.0400806	0.375178	-0.329064
CEBPB	0.0401224	0.375282	0.317459
CAPZA1	0.0401711	0.375448	0.266487
COMT	0.0402188	0.375448	0.270907
ITGB1BP1	0.0402477	0.375448	0.242199
TSPAN33	0.0402627	0.375448	0.444463
CCT4	0.0403571	0.375805	0.406843
PSMB6	0.0403623	0.375805	0.414525
RPGR	0.0405548	0.37656	-0.373613
MPZL2	0.0405625	0.37656	-0.570128
C6orf120	0.0405819	0.37656	0.241911
ANKRD9	0.0406105	0.37656	0.903108
LILRA6	0.0406516	0.37656	0.434475
SYTL3	0.0406564	0.37656	0.325965
TRAK2	0.0407246	0.37656	0.573495
EXOG	0.0407501	0.37656	-0.298943
ST3GAL5	0.0407567	0.37656	-0.296364
RPL13AP25	0.0408072	0.37656	-1.97434
EP400NL	0.0408121	0.37656	-0.341445
ALOX12-AS1	0.0408357	0.37656	-0.403755
CTD-2233K9.1	0.0408756	0.37656	-0.544357
BLOC1S2	0.0408829	0.37656	0.357179
KIAA1143	0.0409044	0.37656	0.229811
TNFSF10	0.0409774	0.376949	-0.557825
RP11-50I19.2	0.0410121	0.376985	-0.487833
RBM25	0.0410999	0.377509	-0.213853
PLOD2	0.0412404	0.378516	0.750638
GADD45GIP1	0.0413586	0.379316	0.463647
IAH1	0.0414	0.379349	0.314825
LRRIQ3	0.0414334	0.379349	0.647767
FAM174A	0.0414763	0.379349	-0.337144
RPL5	0.0416302	0.379349	0.385079
GIT2	0.0416519	0.379349	-0.305817
KCTD20	0.0416677	0.379349	0.237911
MARCO	0.0416762	0.379349	0.687489
ATP2C2	0.0416771	0.379349	1.20901
ATP6V0E1	0.0417244	0.379349	0.240557
KMT2D	0.0417306	0.379349	-0.458652
HAT1	0.0417393	0.379349	0.374023
CEBPG	0.0417401	0.379349	0.238542
TM2D2	0.0417647	0.379349	0.268447
RPS27L	0.0418642	0.379971	0.539106
ARSG	0.0419128	0.380074	-0.421226
SLC44A1	0.041945	0.380074	0.29433
TGIF1	0.0419685	0.380074	0.344771
ATP6V0B	0.0420263	0.38016	0.261572
U1	0.042068	0.38016	0.585988
RRAGC	0.0420711	0.38016	0.26929
FCGR3A	0.0421408	0.380223	-0.620433
NAIP	0.0421609	0.380223	0.608212
HSP90AB1	0.0421711	0.380223	0.598166
NECAP1	0.042238	0.380545	-0.244288
CHST15	0.0423278	0.381023	-0.345207
TNFRSF10B	0.0423668	0.381023	-0.227155
TPRG1L	0.0423842	0.381023	0.328185
CCPG1	0.0424399	0.381243	0.318468
RAB11FIP1	0.0425437	0.38185	-0.324914
MPC2	0.0425697	0.38185	0.308757
KLF9	0.0426172	0.381962	0.316095
UPF3B	0.0426616	0.381962	-0.279452
ABR	0.0426758	0.381962	-0.357949
EXOC5	0.0427562	0.382403	0.175767
IPO5	0.0429053	0.383368	0.193604
ZNF43	0.0429415	0.383368	0.249636
TMEM126A	0.042958	0.383368	0.400695
MED7	0.0430464	0.383816	0.297327
GNPDA2	0.0430708	0.383816	0.2005
RPS28	0.043223	0.384892	0.476461
JADE3	0.0432892	0.385201	0.34996
RNF31	0.0433675	0.385619	-0.29906
GPN1	0.0434558	0.386123	0.244572
PTTG1	0.043524	0.386449	0.482745
VASH1	0.0435724	0.386599	-0.585207
ZNF487	0.0436802	0.387275	-0.310393
LPCAT4	0.0437273	0.387412	-0.375254
CHCHD1	0.0437907	0.387693	0.390519
TESPA1	0.0438432	0.387878	-0.346055
ZCCHC10	0.0438776	0.387902	0.335336
UBA7	0.0439661	0.388384	-0.411007
PTPN18	0.0439955	0.388384	-0.310602
KIF14	0.0441764	0.3897	0.395977
CCSER1	0.0442573	0.389965	0.410272
TBCA	0.0442701	0.389965	0.454605
TRGV4	0.0444163	0.390972	1.08515
NDUFA4	0.0445016	0.391441	0.408778
CNEP1R1	0.0445711	0.39174	0.19436
RNU1-2	0.0446117	0.39174	0.728728
ERG	0.0446315	0.39174	0.750323
THAP2	0.0446705	0.391803	0.306199
CDK5RAP3	0.044884	0.392472	-0.231424
RPS3	0.0449185	0.392472	0.324434
DENND3	0.0449292	0.392472	-0.325193
OR51R1P	0.0449644	0.392472	-0.750322
UPP1	0.0449648	0.392472	0.293189
RP11-439L18.1	0.0449947	0.392472	-0.505696
PSMA7	0.0450339	0.392472	0.310888
SERPING1	0.045051	0.392472	-0.952532
C14orf166	0.0450776	0.392472	0.200271
TRPS1	0.0450886	0.392472	0.348938
CTA-113A6.1	0.0450992	0.392472	-0.57291
H2AFV	0.0451651	0.392504	0.231249
XKR8	0.045167	0.392504	-0.451893
PRDX3	0.0452319	0.392558	0.277181
UNC13B	0.0452373	0.392558	0.599193
HERC3	0.0453074	0.392889	-0.354629
MRPS18C	0.0453481	0.392963	0.362516
EMB	0.0454289	0.393386	0.377325
ZNF333	0.0455191	0.393633	-0.279526
ZNF282	0.0455948	0.393633	0.273359
MRPL22	0.0456508	0.393633	0.329148
SNRNP27	0.045669	0.393633	0.35852
PWP2	0.0456979	0.393633	-0.503756
TTC33	0.0457002	0.393633	0.26583
TRGV10	0.045705	0.393633	-0.523909
GNA15	0.0457161	0.393633	0.472932
TP53BP1	0.0457676	0.393633	-0.262901
HSH2D	0.0457788	0.393633	-0.471635
CTNNB1	0.0458177	0.393665	0.180099
TCEAL3	0.0458467	0.393665	0.569668
RBL1	0.0459504	0.394279	0.242848
LSM7	0.0460162	0.394507	0.342164
CAT	0.0460727	0.394507	0.342104
PRIM1	0.0461154	0.394507	0.303017
PDZD8	0.046132	0.394507	0.322229
COA4	0.046138	0.394507	0.307744
TMED1	0.046371	0.396136	0.419882
RP11-26J3.3	0.0464255	0.396136	-0.362571
CCDC134	0.0464835	0.396136	0.434081
BST1	0.0465571	0.396136	0.305589
GPD2	0.0465691	0.396136	0.272101
MMRN1	0.0465968	0.396136	0.937201
ZNF880	0.0466076	0.396136	-0.342239
RARA-AS1	0.0466145	0.396136	0.382588
GTF3A	0.0466194	0.396136	0.268398
LINC01013	0.0466602	0.396169	-0.447394
ME1	0.046688	0.396169	0.55344
UBXN2A	0.046731	0.396259	0.300186
TMED7	0.0467874	0.396277	0.262386
NCAPH	0.0468241	0.396277	0.367997
MYO5A	0.0468301	0.396277	-0.321714
CD33	0.0469302	0.396522	-0.534356
TBPL1	0.046972	0.396522	0.274631
RP11-81H14.2	0.0469778	0.396522	-0.36441
TRIM21	0.0469885	0.396522	-0.267782
FAM60A	0.0470612	0.396549	0.186126
SLA	0.0470683	0.396549	0.268627
RP11-568N6.1	0.0470888	0.396549	0.516037
VDAC1	0.0472475	0.397575	0.300829
HAL	0.0472755	0.397575	-0.672669
IFRD2	0.0474004	0.398352	0.574855
DEGS1	0.0475822	0.399606	0.245669
LSM3	0.0476465	0.399858	0.512442
PDZK1IP1	0.0476776	0.399858	-0.853145
GRAMD1B	0.0477635	0.400305	-0.887714
ADD2	0.0478534	0.400695	0.397209
GMNN	0.047965	0.400695	0.384338
PLCB2	0.0479889	0.400695	-0.476824
CLIC4	0.0479941	0.400695	0.393043
PTTG1IP	0.0480018	0.400695	0.244652
PHF13	0.0480062	0.400695	0.324187
GAS8	0.0480617	0.400885	-0.561824
FAM89A	0.0482775	0.402336	0.50031
HIST2H2AC	0.0483013	0.402336	0.294616
SEC61G	0.0483604	0.402373	0.528535
NFIA	0.0483741	0.402373	0.53004
PRKD2	0.0484063	0.402373	-0.347686
FBXO39	0.0484493	0.402373	-1.01456
LGALS1	0.0484788	0.402373	0.513993
EHD1	0.0485196	0.402373	-0.242479
RPL3P7	0.0485922	0.402373	2.32181
RP11-396C23.4	0.0486234	0.402373	-0.416658
RP11-159G9.5	0.048634	0.402373	0.221644
STON1	0.0486587	0.402373	0.494622
TTYH2	0.0486773	0.402373	-0.598496
NKTR	0.0486998	0.402373	-0.24091
NUP43	0.0487965	0.402837	0.201695
RP11-43F13.1	0.0488364	0.402837	-0.407917
KIF3C	0.0488546	0.402837	0.452788
RSL24D1	0.048905	0.402981	0.438052
PSMD14	0.0489634	0.403136	0.315162
ZNF846	0.0490217	0.403136	-0.302588
GZMK	0.0490225	0.403136	0.405591
MND1	0.0491204	0.403671	0.678057
RBM23	0.0491612	0.403734	-0.269098
VTI1A	0.0492444	0.404147	-0.18423
ZSWIM8	0.0493105	0.404419	-0.296263
RP11-705C15.3	0.0493479	0.404455	-0.376449
C1orf74	0.0494789	0.405258	0.325016
KRT8P46	0.0495273	0.405382	-0.456294
KIF11	0.0495764	0.405513	0.458346
SLC1A5	0.0496433	0.405612	0.591348
RPS14P4	0.0496825	0.405612	-0.591396
WDR47	0.0496877	0.405612	0.208651
CREG1	0.0497433	0.405646	0.332129
FAM160B2	0.0497736	0.405646	-0.420473
GLCCI1	0.0497912	0.405646	-0.340358
HIST1H2BE	0.0498889	0.406172	0.455869
CIR1	0.0500387	0.406919	-0.284467
HIST1H1E	0.050047	0.406919	0.443141
CCNA2	0.0502999	0.40825	0.485497
TPRKBP2	0.0503089	0.40825	-0.314927
CETN2	0.0503477	0.40825	0.419339
MTR	0.0503903	0.40825	-0.193104
ARRDC1	0.0504817	0.40825	-0.303661
DOCK8	0.0504946	0.40825	-0.359301
BBS12	0.050496	0.40825	0.305623
MMADHC	0.0504997	0.40825	0.263669
VTA1	0.0505205	0.40825	0.205453
UBE2T	0.050544	0.40825	0.467884
KIF15	0.0505875	0.408332	0.408309
ZNF200	0.0507435	0.409015	-0.356774
ATP5SL	0.0507597	0.409015	0.344831
SLC41A2	0.0507722	0.409015	0.438274
CCNI	0.0508822	0.409632	0.4186
HSPA7	0.0509476	0.409889	-0.858531
ZNF542P	0.05102	0.410202	-0.308161
KLHL28	0.0511083	0.410643	0.168053
MTATP6P1	0.0511539	0.410715	-1.40136
AP2S1	0.0511844	0.410715	0.369855
UQCRFS1	0.0513162	0.411504	0.251418
HIST1H3I	0.0513748	0.411704	0.441882
MANBA	0.0514411	0.411966	-0.292327
CDK10	0.0514873	0.412067	-0.274403
CENPA	0.0515734	0.412264	0.512177
KIAA1586	0.0515793	0.412264	0.40285
XRCC1	0.0516556	0.41244	-0.36647
TAGAP	0.0516686	0.41244	-0.314193
RPS19	0.0517799	0.412874	0.312193
TPST2	0.0518041	0.412874	0.249704
GFM2	0.0518517	0.412874	0.195946
ABCA7	0.0518684	0.412874	-0.461551
EVL	0.0519195	0.412874	-0.304756
C5orf30	0.0519251	0.412874	0.368296
MRPS33	0.0522182	0.41358	0.370235
CHST12	0.0522268	0.41358	-0.296133
ETNK1	0.0522521	0.41358	0.214653
KLHL15	0.0523009	0.41358	0.283893
GYPE	0.0523117	0.41358	0.935799
TCP1	0.0523246	0.41358	0.409538
CPQ	0.05234	0.41358	-0.327663
ABCB10	0.05234	0.41358	0.362185
ADAMTS3	0.0523763	0.41358	0.906617
LINC00852	0.0523873	0.41358	-0.636796
C1orf52	0.052425	0.41358	0.197797
OPN3	0.0524807	0.41358	0.257013
ITPR2	0.0524818	0.41358	-0.232765
SPHK1	0.0524865	0.41358	0.614904
RP11-53B2.2	0.0525973	0.41413	-0.494668
KIAA0319L	0.0526481	0.41413	-0.423394
CCT6P3	0.0526577	0.41413	-0.478493
PDE4B	0.0527606	0.414673	-0.316444
RPSA	0.0528061	0.414765	0.441783
ATG14	0.0529076	0.414856	0.290002
ACSL6	0.0529284	0.414856	0.588031
MAN1A2	0.0529327	0.414856	0.289535
EPB41L2	0.0529531	0.414856	0.295689
EIF3H	0.0529987	0.414947	0.189655
INPP5D	0.0531163	0.415526	-0.362316
ADAR	0.0531595	0.415526	-0.318347
VPS54	0.0531966	0.415526	0.187435
TNPO1	0.0532378	0.415526	0.177319
PICK1	0.0532443	0.415526	0.371497
CDCA7L	0.0533198	0.415526	0.289524
PIK3R5	0.053321	0.415526	-0.332661
PEF1	0.0533727	0.415526	0.306017
NEB	0.0534099	0.415526	-0.496488
CDK6	0.0534117	0.415526	0.27396
P4HA1	0.0535183	0.415804	0.462407
SECISBP2	0.0535537	0.415804	-0.217127
ARHGAP27	0.0535612	0.415804	-0.277925
PPCDC	0.0535831	0.415804	-0.320757
ZNF124	0.0536471	0.41586	0.329103
AKAP13	0.053688	0.41586	-0.377019
ARHGEF12	0.0536922	0.41586	0.610327
RPL7	0.0539124	0.417302	0.560327
HK1	0.0540371	0.418003	0.513023
MELK	0.0541013	0.418078	0.37788
SOCS3	0.054115	0.418078	0.664482
UBTD2	0.0541858	0.418361	0.286725
NUP188	0.0542331	0.418462	-0.265146
CAMP	0.0544311	0.419575	0.736637
VEGFA	0.0544458	0.419575	0.508718
NHS	0.054509	0.419798	-0.749022
DENND1C	0.054641	0.420333	-0.41336
ABCC13	0.0546471	0.420333	0.918094
RBM4	0.054703	0.420499	-0.265396
TRAJ26	0.0547956	0.420947	-0.470256
TMEM68	0.0548946	0.421057	0.199972
RPL37	0.0548947	0.421057	0.374512
RP3-476K8.3	0.0549131	0.421057	-0.474809
PRRG4	0.0549731	0.421254	-0.623541
SEMA7A	0.0550459	0.421548	0.346194
HIST1H2AD	0.055098	0.421594	0.390848
MZT1	0.0551225	0.421594	0.385385
RPAP3	0.0551551	0.421594	-0.241224
MAOA	0.055234	0.421934	1.1101
PSMA3-AS1	0.0553208	0.422182	-0.196979
IRF9	0.0553353	0.422182	-0.319886
POLR3D	0.0554035	0.422292	-0.228991
C3orf62	0.0554366	0.422292	-0.356426
TAS2R4	0.0554531	0.422292	-0.597503
PVT1	0.0555976	0.42304	-0.366432
SLC46A2	0.0556204	0.42304	-0.579305
COPE	0.0558505	0.424526	0.343896
TMCO1	0.0560272	0.425605	0.355881
NDFIP2	0.0561373	0.42591	0.460714
C1orf162	0.0561705	0.42591	0.346452
RUFY3	0.0562225	0.42591	-0.199402
ACADSB	0.0562226	0.42591	-0.309605
GPX1	0.0562412	0.42591	0.923094
SH2B1	0.0562999	0.426091	-0.377251
NSUN3	0.0564155	0.426703	0.27166
GRPEL1	0.05658	0.427425	0.295586
FCHO1	0.0566041	0.427425	-0.301964
GMDS	0.0566456	0.427425	-0.270458
RP11-104L21.3	0.0566505	0.427425	-0.737348
IFNG	0.0567438	0.427635	0.56598
PIK3CA	0.0568079	0.427635	0.162406
LYSMD3	0.0569003	0.427635	0.246633
AP2B1	0.0569036	0.427635	0.245387
LINC00954	0.0569285	0.427635	-0.549272
GPX7	0.0569333	0.427635	0.471067
THOC5	0.0569379	0.427635	-0.216277
XPO6	0.0569575	0.427635	-0.32043
UCK2	0.0571688	0.428959	0.280868
POU2F2	0.0572327	0.429001	-0.407204
TMEM252	0.0572931	0.429001	-0.694889
ACRBP	0.0572934	0.429001	-0.47218
LINC00402	0.0573615	0.429001	-0.538083
NDUFC1	0.0573669	0.429001	0.275253
HIST1H2BB	0.0573845	0.429001	0.522828
LMTK2	0.0574685	0.429066	-0.346134
PTRHD1	0.0574747	0.429066	0.401951
ANKRD20A11P	0.0574982	0.429066	-0.698577
CROCC	0.057654	0.429221	-0.385724
PACS1	0.057662	0.429221	-0.386828
DSP	0.0577396	0.429221	-1.10744
FBXO45	0.0577425	0.429221	0.235395
COX7B	0.0577582	0.429221	0.416389
AE000661.37	0.0577727	0.429221	-0.713291
ZAP70	0.0577799	0.429221	-0.184831
ACSL1	0.0577993	0.429221	0.386064
NTNG2	0.0578728	0.429492	-0.419166
VPS26B	0.057944	0.429492	-0.219723
DDX58	0.0579472	0.429492	-0.481608
VGLL4	0.0579966	0.429492	0.244371
FAM169A	0.0580614	0.429492	0.313903
DOCK10	0.058112	0.429492	-0.248218
THAP11	0.0581133	0.429492	0.321933
RAB23	0.0581187	0.429492	0.4109
MDN1	0.0581512	0.429492	-0.273883
SCN8A	0.0583648	0.430121	0.767337
PTS	0.058382	0.430121	0.212217
MGAT4B	0.0584006	0.430121	0.237092
MGST2	0.058434	0.430121	0.341653
CENPH	0.0585132	0.430121	0.432244
ANPEP	0.0585731	0.430121	-0.717507
ZNF548	0.0585791	0.430121	-0.264175
FAM220A	0.058609	0.430121	0.244452
CEACAM1	0.0586127	0.430121	0.601041
YLPM1	0.0586326	0.430121	-0.299743
CD200R1	0.0586979	0.430121	0.364595
RAB39A	0.0586996	0.430121	0.343942
LINC00299	0.0587012	0.430121	-0.486852
SCD	0.0587551	0.430121	0.540088
ANKRD13A	0.0588011	0.430121	-0.259598
USP45	0.0588097	0.430121	0.216143
PGAM1	0.0588457	0.430121	0.322508
SLC30A1	0.0588931	0.430121	0.369239
TEFM	0.0589034	0.430121	0.236264
SCPEP1	0.0590436	0.430666	0.304633
CATSPER2	0.0590483	0.430666	-0.485335
TOB1	0.0591383	0.43102	0.279758
YEATS4	0.0591672	0.43102	0.396813
ILF2	0.0592411	0.431255	0.282016
MICA	0.0592699	0.431255	-0.297269
GYPA	0.0593729	0.431644	0.922202
XAF1	0.0593943	0.431644	-0.55596
IL10RB-AS1	0.059429	0.431644	0.308802
KCNN4	0.0595586	0.432329	0.428687
GTF2F2	0.0597966	0.433537	0.26425
SMPDL3A	0.0598122	0.433537	0.603466
NHSL2	0.0598362	0.433537	-0.512609
RNF139	0.059867	0.433537	0.285221
KIR2DS4	0.059902	0.433537	1.10197
DNASE1L1	0.0600072	0.433545	0.301815
BNIP2	0.0600442	0.433545	0.192903
KIAA0556	0.0600648	0.433545	-0.329581
MLYCD	0.0600794	0.433545	-0.393113
LINC01184	0.0601096	0.433545	-0.234354
GPR171	0.0601153	0.433545	0.371898
AKNA	0.0601708	0.43369	-0.385445
PAPD5	0.0602222	0.433732	0.176017
GABPB1	0.0602719	0.433732	0.179613
RASGEF1B	0.0602828	0.433732	0.343191
CDK8	0.0603397	0.433886	0.281858
CTSH	0.060383	0.433943	0.408269
PECR	0.0604376	0.434081	0.327871
LINC00989	0.0605402	0.434563	-0.637147
MRPL3	0.0606251	0.43468	0.324078
MAP9	0.0606541	0.43468	0.282138
AL023806.1	0.0606629	0.43468	0.320437
ATP6V1E2	0.0607099	0.434695	-0.31306
RP1-228H13.2	0.0607564	0.434695	-0.814663
ELL	0.0607855	0.434695	-0.283075
RP11-321E2.4	0.0608164	0.434695	-0.677245
CHD2	0.0608451	0.434695	-0.213328
POMP	0.0609028	0.434695	0.334995
GIMAP4	0.0609602	0.434695	-0.484821
KPNB1	0.0610021	0.434695	-0.237955
RP13-516M14.1	0.0610146	0.434695	-0.332451
MICALL1	0.0610198	0.434695	-0.528479
LRRC41	0.0611397	0.435297	0.194534
APOBEC3D	0.061208	0.43553	-0.474971
UMODL1-AS1	0.0612523	0.435592	-1.87816
RPL6	0.0614097	0.435944	0.290839
DGCR12	0.061418	0.435944	-0.497689
CORO1C	0.0614209	0.435944	0.277784
TPM4	0.0614514	0.435944	0.359172
CLHC1	0.0614974	0.435944	-0.384238
PPFIBP2	0.0615153	0.435944	-0.334776
FAM72B	0.0616011	0.4363	0.477436
SORL1	0.0617227	0.436582	-0.365741
MYO9B	0.0617245	0.436582	-0.233045
ARV1	0.0617485	0.436582	0.224984
NLRP12	0.0617854	0.436582	0.370645
RP4-737E23.6	0.0618191	0.436582	-0.583312
AC004069.2	0.0618632	0.436642	-0.492134
GVINP1	0.0620411	0.437537	-0.342081
ANKRD28	0.0620615	0.437537	0.317837
NDUFAF4	0.0621478	0.437894	0.32959
GOLGA5P1	0.0622311	0.438019	-0.519575
RP11-902B17.1	0.0622371	0.438019	-0.333772
RP11-73O6.3	0.062289	0.438133	-0.547895
HIF1A	0.0624103	0.438348	0.340254
AIM2	0.0624448	0.438348	-0.471871
PHF5A	0.0624914	0.438348	0.331213
PLEKHA8P1	0.0624921	0.438348	-0.288885
ATXN7	0.0624985	0.438348	-0.373609
MOSPD1	0.0626212	0.438717	0.477706
NFXL1	0.0626228	0.438717	-0.519956
TMEM50B	0.0627328	0.438933	0.261281
LPAR5	0.0627492	0.438933	-0.392012
IFIT3	0.062761	0.438933	-0.841935
RALGAPA1P	0.0628866	0.43956	0.406911
VPS39	0.0630565	0.440341	-0.256194
AKIP1	0.0630712	0.440341	0.418589
RP11-727A23.5	0.0631061	0.440341	-0.26497
SOCS6	0.0631522	0.440412	0.255926
UHMK1	0.063235	0.440533	0.184668
LAMTOR1	0.0632415	0.440533	0.225562
FAM8A1	0.0632905	0.440624	-0.305826
NDUFAF3	0.0634313	0.441103	0.307924
DGKQ	0.063474	0.441103	-0.362795
NEURL4	0.0635056	0.441103	-0.24456
UMAD1	0.0635685	0.441103	-0.207966
NDRG1	0.0635809	0.441103	0.23172
IRF2	0.0636002	0.441103	-0.294837
KIAA1715	0.0636451	0.441103	0.250748
DDT	0.0636473	0.441103	0.474491
CMAS	0.0637731	0.441445	0.33972
SUV39H2	0.0637743	0.441445	0.314577
COPZ1	0.0638252	0.441445	0.260023
IGKV2-29	0.0638407	0.441445	1.60243
DAPK2	0.0638784	0.441456	-0.497262
STAMBP	0.0639878	0.441649	-0.196197
ST20-AS1	0.0640051	0.441649	0.397361
SMIM15	0.0640144	0.441649	0.273177
JRKL	0.0640954	0.441656	0.25244
GCLC	0.0641144	0.441656	0.479548
ARHGEF1	0.0642582	0.441656	-0.235819
ADCY10	0.0642813	0.441656	-0.443677
RPL21	0.0642891	0.441656	0.518299
BAZ2A	0.0642908	0.441656	-0.417735
RUVBL2	0.0642947	0.441656	0.331475
MGST3	0.0643517	0.441656	0.27129
PDGFC	0.0644362	0.441656	0.574418
CCDC170	0.0644969	0.441656	-0.847076
ERI2	0.0645168	0.441656	0.257392
EGLN1	0.0645229	0.441656	-0.245559
PRKRIRP7	0.0645383	0.441656	-0.457721
C9orf89	0.0646303	0.441656	0.404752
H2AFJ	0.0646936	0.441656	0.310229
SCARNA13	0.0647387	0.441656	0.326244
RN7SL288P	0.0647622	0.441656	-0.586532
SERPINI1	0.0648148	0.441656	0.366923
CAMLG	0.0648321	0.441656	0.230343
TECPR1	0.0649168	0.441656	-0.224643
RNF166	0.0649299	0.441656	-0.362586
PDCD7	0.0649383	0.441656	0.215051
NHP2	0.0649541	0.441656	0.304519
PHF12	0.0649589	0.441656	-0.3524
RB1	0.0649606	0.441656	0.171252
CRACR2A	0.0649813	0.441656	-0.280867
EDRF1	0.0649886	0.441656	-0.159467
MYL12A	0.0650884	0.441936	0.222419
JARID2	0.0651064	0.441936	-0.2612
RP11-348N5.9	0.0651591	0.441936	-0.48131
NUB1	0.0651811	0.441936	-0.325727
TPX2	0.0652102	0.441936	0.400502
C22orf29	0.0652983	0.441944	-0.341016
CASS4	0.0653104	0.441944	-0.447723
UBE2D2	0.0653389	0.441944	0.201437
CD46	0.0654246	0.441944	-0.295751
TIMP1	0.0654467	0.441944	0.542903
UBA6	0.0654894	0.441944	0.1934
RPL21P44	0.0654994	0.441944	-0.488996
HSPD1	0.065532	0.441944	0.610085
RP11-815J21.2	0.065536	0.441944	-0.491531
LIN7C	0.0657069	0.442822	0.217488
CD80	0.0657385	0.442822	0.436331
PLP2	0.0658093	0.443056	0.471379
NUDCD2	0.0658868	0.443334	0.268821
TWISTNB	0.0659869	0.443764	0.246576
NUDT21	0.0661679	0.444678	0.183455
BACH1-IT2	0.0662065	0.444678	-0.417208
CAMK1	0.0662317	0.444678	-0.443202
UBE2L6	0.0663239	0.445053	-0.433331
S1PR4	0.0664094	0.445054	0.38321
CHI3L2	0.0664622	0.445054	0.412571
RP4-647J21.1	0.0664774	0.445054	-0.484965
ZNF70	0.0665082	0.445054	-0.366116
DNAJC25	0.0665966	0.445054	0.294629
PCNXL3	0.0666035	0.445054	-0.306826
C9orf3	0.0667308	0.445054	-0.231692
TIMMDC1	0.0667915	0.445054	0.243909
VSIG4	0.0668115	0.445054	0.987997
LTB	0.0668399	0.445054	-0.305178
ACOT13	0.0668441	0.445054	0.291166
PRKCB	0.066855	0.445054	-0.226241
PPP1R2	0.0668569	0.445054	0.190629
LINC01270	0.0668635	0.445054	-0.679118
MRPS16	0.0668689	0.445054	0.236385
RABAC1	0.0669788	0.445543	0.384075
FAM210A	0.067066	0.445615	0.214019
PASK	0.0671051	0.445615	-0.262244
UQCRB	0.0671287	0.445615	0.648849
MAFK	0.0671701	0.445615	0.272458
HMGCR	0.0671714	0.445615	0.233885
ERCC5	0.067234	0.445789	-0.185299
PAIP2	0.0673601	0.446383	0.21663
SCO2	0.0674084	0.446462	-0.383629
ZC3H12C	0.0677026	0.447819	0.569376
ETV7	0.0677102	0.447819	-0.841331
PAFAH1B2	0.0677228	0.447819	0.170859
TSN	0.067793	0.447826	0.231776
CLTB	0.0677971	0.447826	0.378784
GPN3	0.068096	0.448249	0.374226
DNAJB1	0.0681015	0.448249	0.800969
SLC2A9	0.0681071	0.448249	-0.43655
PSMA1	0.0681285	0.448249	0.199834
NAT10	0.0681292	0.448249	-0.199615
S100A10	0.0681489	0.448249	0.294674
PVR	0.0681706	0.448249	0.319912
CEP250	0.0681897	0.448249	-0.183589
HNRNPC	0.0681903	0.448249	0.212501
ZNF550	0.0683227	0.448652	-0.210374
BZRAP1	0.0683397	0.448652	-0.416101
LINC01506	0.0683937	0.448652	-0.434339
AF131215.3	0.0683982	0.448652	-0.691969
HEXDC	0.0684783	0.448938	-0.410642
GIMAP8	0.0685364	0.448961	-0.431418
RP5-1180E21.5	0.0686068	0.448961	-0.249291
LOXL3	0.0686321	0.448961	-0.294521
INO80E	0.0686558	0.448961	-0.227223
RAB11FIP4	0.068665	0.448961	-0.303607
MGST1	0.0687303	0.449148	0.406301
RP11-10J21.4	0.0688396	0.449623	-0.546841
TRAPPC6B	0.0689447	0.450069	0.163675
RIOK3	0.0690101	0.450174	0.610385
ALKBH5	0.0690343	0.450174	0.203177
EFCAB2	0.0690967	0.45023	-0.667886
SNRK	0.0691322	0.45023	-0.195637
EIF5	0.0692381	0.45023	0.183045
ZNF335	0.0692412	0.45023	-0.267092
GBP5	0.0692658	0.45023	-0.620364
RP11-6I2.3	0.0692766	0.45023	-0.666559
SH3GLB2	0.0693597	0.45023	0.399714
ZNF783	0.0693718	0.45023	-0.271312
MIOS	0.0694074	0.45023	0.214374
ITGB7	0.0694104	0.45023	-0.39424
IL4I1	0.069579	0.451085	0.743582
PPIA	0.0697913	0.452222	0.278904
SLC27A2	0.0700967	0.453713	0.503301
SZT2	0.0701051	0.453713	-0.293879
C11orf71	0.0701325	0.453713	0.290488
PARP8	0.0702085	0.45391	-0.267148
ZZEF1	0.0702369	0.45391	-0.265267
TCL1A	0.0703444	0.45396	0.341024
RP11-44F14.1	0.0703692	0.45396	-0.456888
PAK1	0.0703838	0.45396	-0.32483
AC017035.2	0.0703929	0.45396	-0.507761
KRR1	0.0705017	0.454422	0.195324
MRPL20	0.0706663	0.454929	0.347806
FAM63B	0.0706885	0.454929	0.230472
RP11-996F15.6	0.0706916	0.454929	-0.379112
ATL3	0.0708714	0.455847	0.242439
PELO	0.0709468	0.456092	0.272867
RWDD4	0.0710718	0.456462	0.219597
MAML3	0.0710789	0.456462	-0.487879
PLA2G4C	0.0712029	0.456824	-0.403784
SCIMP	0.0712109	0.456824	-0.324218
IL6R	0.0712758	0.456824	-0.261973
SRF	0.0713211	0.456824	0.222955
KDM4A	0.0713217	0.456824	-0.198268
FEM1A	0.0714273	0.45725	0.30574
PLEKHA2	0.0714869	0.45725	0.177605
ITLN1	0.0715221	0.45725	1.40524
FGD3	0.0715436	0.45725	-0.323973
SERPINB10	0.0715967	0.45725	1.03092
MRPL33	0.0716143	0.45725	0.310077
NCAPG	0.0716565	0.45725	0.398666
SPIN4	0.0716867	0.45725	0.353712
RHBDF2	0.0718129	0.457817	-0.329602
RP11-384K6.6	0.071952	0.458151	-0.344822
NEU1	0.071957	0.458151	0.288529
MBOAT1	0.0720215	0.458151	-0.258697
C1orf132	0.0720739	0.458151	-0.462713
FAM96B	0.0720965	0.458151	0.375724
VAPA	0.0721188	0.458151	0.183055
PSMC6	0.0721271	0.458151	0.336458
TTC22	0.0721968	0.458356	-0.424607
IGKV1-6	0.0723134	0.458859	1.03206
MYO10	0.0723976	0.45906	0.386053
RP11-10J21.2	0.07242	0.45906	-0.609777
CTD-3022L24.1	0.0725876	0.459419	-0.504612
NDUFS6	0.0726597	0.459419	0.325423
RP11-415F23.4	0.0726956	0.459419	-0.441037
RAB4A	0.0727578	0.459419	0.200212
IRF8	0.0728012	0.459419	0.218374
RHD	0.0728141	0.459419	0.939307
ZRANB3	0.0728233	0.459419	0.238134
CD200	0.0728292	0.459419	0.373237
ARAP1	0.0728464	0.459419	-0.255567
TXNDC5	0.0728517	0.459419	-0.691548
ANKRD36	0.0728938	0.459449	-0.248252
AHSA1	0.0729683	0.459469	0.569692
C18orf32	0.0729933	0.459469	-0.414435
CD86	0.0730467	0.459469	-0.382639
ZNF611	0.073047	0.459469	-0.215607
REEP3	0.0730893	0.459499	0.176706
ARHGEF6	0.0732004	0.459895	-0.223432
LINC01359	0.0732273	0.459895	-0.621326
SNX16	0.0734246	0.460898	0.246685
MRPL49	0.0734993	0.46113	0.227549
RFC4	0.073547	0.461193	0.268957
RP11-159D12.2	0.0736112	0.461359	-0.331573
CGGBP1	0.0739952	0.462979	0.198908
RP11-631N16.2	0.0740791	0.462979	-0.297937
C1GALT1C1	0.0741266	0.462979	0.304093
NDUFS7	0.0741514	0.462979	0.369575
TRAV13-1	0.0741992	0.462979	-0.478638
ORC6	0.0742039	0.462979	0.429294
LINC01480	0.0742147	0.462979	0.531929
CLEC6A	0.0742174	0.462979	0.598997
RP11-134L10.1	0.0742383	0.462979	-0.429797
PHF21A	0.0742474	0.462979	-0.323164
CEP55	0.0744153	0.463185	0.517814
HECW2	0.0744165	0.463185	-0.467681
IRF2BP2	0.0744684	0.463185	0.22491
RNASE3	0.0745065	0.463185	1.14199
F2RL1	0.0745692	0.463185	-0.743182
RPS2P44	0.0746222	0.463185	-0.317474
MT-ND5	0.0746377	0.463185	-1.20247
LYRM4	0.0746399	0.463185	0.273101
MICALCL	0.074655	0.463185	0.75723
AC008074.5	0.0746796	0.463185	-0.914402
CARHSP1	0.074722	0.463185	0.36334
MRPL23	0.074734	0.463185	0.385155
DARS2	0.0747895	0.463294	0.213923
HLCS	0.0748372	0.463356	-0.272078
ATP5E	0.0749692	0.46387	0.384653
COMMD5	0.0750388	0.46387	0.223199
MZF1	0.0751115	0.46387	-0.280273
FIBP	0.0751292	0.46387	0.302774
TAP2	0.0751899	0.46387	-0.411933
MAPK6	0.0752149	0.46387	0.268094
ZNF276	0.0752156	0.46387	-0.224204
IGLV3-19	0.0752233	0.46387	0.861917
OAS3	0.0752706	0.463929	-0.724784
RP11-51F16.1	0.0754304	0.464544	-0.274706
RNF167	0.0754462	0.464544	-0.362349
SQLE	0.0756025	0.465272	0.484179
POGZ	0.0756975	0.465612	-0.272025
FKBP2	0.0758165	0.465612	0.463017
LINC-PINT	0.0758305	0.465612	-0.260115
KMT2C	0.0758593	0.465612	-0.309832
NANS	0.0758881	0.465612	0.363971
DUSP1	0.0759053	0.465612	0.288673
MIR6723	0.0759237	0.465612	-3.05195
GALM	0.07599	0.465782	-0.515078
[truncated: 10,254 more rows]

## Sheet: CM-UM
Gene	Pvalue	Adjusted_Pvalue	logFC
DEFA3	1.3e-05	0.159146	3.66499
ARL6IP6	5.69e-05	0.180788	0.522342
IGKV2-24	5.73e-05	0.180788	2.52312
ITGA9	7.83e-05	0.180788	1.29355
FAM47E-STBD1	8.33e-05	0.180788	1.00236
ERI2	8.85e-05	0.180788	0.635212
LINC00671	0.000118947	0.207804	1.61373
RGS1	0.000135675	0.207804	1.25507
BPI	0.000166243	0.22633	1.67834
LRRN1	0.000273315	0.334893	1.1331
SLC2A5	0.000435547	0.448644	1.34969
ZNF568	0.00043938	0.448644	-0.454742
SLC44A1	0.000488106	0.460058	0.578897
PID1	0.000682022	0.478034	-1.65428
SLPI	0.00073963	0.478034	1.7647
ELANE	0.000749478	0.478034	3.05346
PHGDH	0.000775891	0.478034	1.15402
LINC01013	0.000824731	0.478034	-0.922513
CEACAM6	0.000860449	0.478034	1.87827
AKAP5	0.000870644	0.478034	1.19969
HSD17B12	0.00088264	0.478034	0.647045
SLC7A11	0.000896588	0.478034	1.05968
APOBEC3B	0.000897313	0.478034	1.52034
ANKRD34B	0.00101087	0.51609	1.52051
CRYBG3	0.00118736	0.548465	-0.522414
HIST1H3B	0.00120777	0.548465	0.972936
COL17A1	0.00120856	0.548465	1.6118
LINC00989	0.00128896	0.564057	-1.37601
CHIT1	0.00135568	0.5728	1.05561
ATP8B4	0.00150314	0.613931	0.785408
PCOLCE2	0.00157891	0.624076	1.76556
DEFA4	0.00169523	0.64087	2.57699
CCDC136	0.00178937	0.64087	-0.891632
MS4A3	0.00179603	0.64087	2.01267
KBTBD6	0.00183061	0.64087	0.749152
CEBPE	0.00200922	0.667272	1.37922
SIKE1	0.00201494	0.667272	0.307485
PECR	0.00209628	0.67594	0.600939
TRAJ33	0.00246695	0.749272	-1.04785
GSTM3	0.0025088	0.749272	-0.911193
ITGAD	0.00254487	0.749272	1.87511
ZFYVE9	0.0025683	0.749272	-0.589665
RP11-121A8.1	0.0027828	0.788473	-1.15589
ZNF585B	0.00286435	0.788473	-0.611916
MPO	0.0029052	0.788473	2.15859
DHFR	0.0031616	0.788473	0.615481
IGLV1-44	0.00316875	0.788473	1.73465
HIST1H3J	0.00321433	0.788473	0.885657
IGLV7-46	0.00322637	0.788473	1.73803
ERG	0.00327661	0.788473	1.18323
ENGASE	0.00328182	0.788473	-0.984783
IL1R2	0.00341563	0.803363	1.12854
RP11-426C22.5	0.00352139	0.803363	-0.883481
C5orf30	0.00360242	0.803363	0.617261
ZNF443	0.00363905	0.803363	0.939285
SPRY2	0.00376919	0.803363	1.29173
DACH1	0.00380735	0.803363	0.704601
ZNF609	0.00384265	0.803363	-0.527221
AK3	0.00400428	0.803363	0.35504
CDK6	0.00411921	0.803363	0.463285
GPR155	0.00421754	0.803363	-0.498468
MIR4697HG	0.00428275	0.803363	-0.987903
NEDD4	0.0043385	0.803363	0.600188
ARHGAP32	0.00434004	0.803363	-0.601911
EXOG	0.00437649	0.803363	-0.501177
MYB	0.00445977	0.803363	0.726538
FAM60A	0.00447606	0.803363	0.308578
ANLN	0.00463463	0.803363	0.823444
PLEKHA8P1	0.00465713	0.803363	-0.521956
ABCA13	0.00468287	0.803363	1.15978
NAP1L5	0.00468507	0.803363	0.721773
MANEA	0.0048133	0.803363	0.658671
TSEN2	0.00493693	0.803363	-0.464131
RPS19	0.00501443	0.803363	0.523811
MIR6723	0.00503425	0.803363	-6.28408
SSBP3	0.00507921	0.803363	-0.648064
PYCR1	0.00508122	0.803363	1.14856
GZMK	0.00514744	0.803363	0.655789
LEF1-AS1	0.00522133	0.803363	-0.786669
TRGV4	0.00527246	0.803363	1.68972
ASS1P1	0.00531073	0.803363	-1.00341
MORC2	0.00541499	0.809144	-0.320702
RP11-18B3.2	0.00556502	0.816833	0.889793
AMOTL1	0.00559977	0.816833	1.13282
TCAF1	0.00572306	0.819148	-0.697727
DIRC3	0.00587454	0.819148	-1.03929
RPS5	0.00588897	0.819148	0.549305
PSAT1	0.00590956	0.819148	0.83872
C4orf46	0.00604918	0.819148	0.620691
NBPF8P	0.00607046	0.819148	-0.540305
PARD3	0.00620825	0.819148	-0.712798
IGHA2	0.00626065	0.819148	1.46522
MMP9	0.00630356	0.819148	1.23723
OLAH	0.006311	0.819148	1.3097
ASNS	0.00635102	0.819148	0.522845
TRAJ23	0.00646419	0.82506	-0.664011
B3GNT8	0.0065979	0.825125	0.676457
RP11-785H5.1	0.00661924	0.825125	0.401307
RBM6	0.00673107	0.825125	-0.382042
SPIN3	0.00692426	0.825125	-0.605565
INHBA	0.00698909	0.825125	1.40943
CTSC	0.00708013	0.825125	0.51027
CD24	0.00716254	0.825125	1.25729
ANAPC11	0.00728056	0.825125	0.634432
VCAM1	0.00728172	0.825125	1.78293
GLO1	0.00728373	0.825125	0.402778
TGFBI	0.0073474	0.825125	-0.983407
FBXO30	0.00736866	0.825125	0.33673
TMEM38B	0.00740016	0.825125	0.604606
MMP8	0.00748692	0.825125	1.88587
MASTL	0.0075426	0.825125	0.469719
MTDH	0.00763719	0.825125	0.388183
KBTBD7	0.00765012	0.825125	0.55768
STXBP5-AS1	0.00777682	0.825125	-0.552004
PCNXL2	0.00779907	0.825125	-0.465823
AC009299.3	0.00781151	0.825125	0.686057
ZNF667	0.00798029	0.83066	-0.735999
CEACAM8	0.00802511	0.83066	1.67277
KIR3DL2	0.00807166	0.83066	1.19514
HIST1H2BC	0.00813509	0.83066	0.488654
ZNF788	0.00829214	0.839699	0.661634
MRPL45	0.00838092	0.841733	0.4585
ZNF331	0.00857536	0.849489	-0.402467
SLC30A6	0.00859681	0.849489	0.228694
ZBTB49	0.00879119	0.850677	-0.317493
HDAC8	0.00881728	0.850677	-0.279892
RP11-35G9.5	0.00889763	0.850677	-0.555363
GPR55	0.00893808	0.850677	0.834265
CEBPA	0.00901305	0.850677	0.729045
CATSPER2	0.00902538	0.850677	-0.806663
HIST1H2BM	0.00916444	0.85719	0.774021
TRAJ14	0.00937173	0.858576	-0.84159
CXCR4	0.00937862	0.858576	0.65563
RPL36A	0.00938947	0.858576	-0.433623
BCL2L15	0.00949748	0.86202	1.05844
OIP5	0.0096296	0.865165	0.757379
ZAP70	0.00967336	0.865165	-0.301016
TMEM216	0.00979404	0.868043	0.489013
CMTM4	0.00984722	0.868043	0.515862
HIST1H2BL	0.0100522	0.8737	0.799757
ARL8A	0.0101253	0.8737	0.371363
SLC1A4	0.0101637	0.8737	0.58253
MRPS26	0.0101966	0.8737	0.578369
SLCO4C1	0.0104189	0.886544	0.589651
OLFM4	0.0105799	0.894037	2.01573
TRDV1	0.010698	0.894393	1.36849
FAM76B	0.0107301	0.894393	0.332148
RPL10	0.0110308	0.906287	0.398431
FAM72B	0.0110581	0.906287	0.741758
FAM220A	0.0111323	0.906287	0.383027
VSTM1	0.0112342	0.906287	0.967525
CNEP1R1	0.0113034	0.906287	0.282613
TUBG1	0.0113166	0.906287	0.571857
CDC20	0.011483	0.913647	0.833705
ARHGAP11A	0.0115934	0.916477	0.516931
CCNG1	0.0117271	0.920079	0.3067
ZFYVE28	0.0117891	0.920079	-0.512478
LLGL2	0.011952	0.926886	-0.4905
HIST1H3D	0.0120676	0.928269	0.515758
LINC00528	0.0122736	0.928269	0.534562
UTS2	0.0124051	0.928269	-2.68627
PAPSS1	0.012485	0.928269	0.743613
SACS	0.0124985	0.928269	0.326859
SNX14	0.0125555	0.928269	0.261497
SPCS1	0.0127075	0.928269	0.419874
MTMR1	0.0127692	0.928269	-0.357816
NEB	0.0128587	0.928269	-0.77529
LARGE	0.0129967	0.928269	-0.692177
HMGN1	0.013046	0.928269	0.362317
RP11-307E17.8	0.013101	0.928269	-0.965807
POLR2M	0.0131201	0.928269	0.306567
DEPDC1B	0.013188	0.928269	0.641016
LINC00299	0.0133603	0.928269	-0.777314
HIST1H3F	0.0134409	0.928269	0.730632
OBSCN	0.0134969	0.928269	-0.65274
ENTPD1-AS1	0.013597	0.928269	-0.339946
BRCA2	0.0137251	0.928269	0.581327
RP5-1112D6.4	0.013735	0.928269	-0.687819
AZI2	0.0137736	0.928269	0.376335
APOA1BP	0.0138037	0.928269	0.550257
LPAL2	0.0138081	0.928269	-0.850873
CTTN	0.0138332	0.928269	-0.979049
TRGV10	0.0139479	0.928269	-0.767891
BNIP3	0.0140107	0.928269	0.510018
CHD3	0.0140687	0.928269	-0.4334
HIST1H1B	0.0142887	0.928269	0.696464
CD63	0.0144217	0.928269	0.545434
CCNE2	0.0145549	0.928269	0.582903
SAPCD2	0.0145594	0.928269	0.794331
CTBP1-AS2	0.0145731	0.928269	-0.540035
CD5	0.0146238	0.928269	-0.53548
RECK	0.0146691	0.928269	-0.356855
ATAD1	0.0146705	0.928269	0.286673
CDCA7L	0.0148449	0.928269	0.419555
TIMM23B	0.0148807	0.928269	-0.446044
IGLV3-27	0.0149894	0.928269	2.08377
HMGCR	0.0149933	0.928269	0.360471
C20orf194	0.0150002	0.928269	-0.519745
CCDC51	0.0151451	0.928529	0.523429
SLC41A1	0.0152388	0.928529	-0.586243
IL1RL1	0.0152926	0.928529	0.730041
RP11-543P15.1	0.0153075	0.928529	0.820415
CX3CR1	0.0153988	0.929466	-0.61204
CCL3L3	0.01552	0.930731	1.39104
FAM153A	0.0155717	0.930731	-1.21002
BHLHE41	0.0157774	0.938451	0.510062
KLHL9	0.0160968	0.952821	0.282773
SLC4A8	0.0162284	0.955996	-0.534086
LINC01059	0.0164672	0.957499	-1.38075
TMEM18	0.0165149	0.957499	0.369051
CPNE2	0.0165962	0.957499	0.630205
LTF	0.0166692	0.957499	1.40801
MTND1P23	0.016672	0.957499	-3.22773
FAAH2	0.0167228	0.957499	-0.560319
SNX24	0.0168136	0.957712	-0.485424
GGH	0.0169463	0.957712	0.879344
CDK4	0.0170028	0.957712	0.530869
MTMR11	0.0170512	0.957712	-0.412973
ZNF782	0.0171718	0.957712	-0.46618
ZNF70	0.0171955	0.957712	-0.577278
RIPK1	0.0173328	0.959431	-0.390514
PLEC	0.017383	0.959431	-0.531823
AP003041.1	0.0176491	0.969752	1.06251
PREX1	0.0177497	0.970925	-0.347673
ZNF573	0.0180608	0.979504	-0.475827
CCL3	0.0180664	0.979504	1.11884
RP11-347C18.3	0.0183088	0.984531	0.749322
SAR1B	0.0184416	0.984531	0.300767
AC133644.2	0.0188201	0.984531	0.827939
TCFL5	0.0188689	0.984531	0.409302
PPP1R15A	0.0189356	0.984531	0.447491
SPPL2A	0.0189816	0.984531	0.258979
PIWIL4	0.019081	0.984531	0.606798
RP11-785H5.2	0.0192342	0.984531	-0.600226
DOCK9	0.019276	0.984531	-0.325779
MYOM1	0.0192916	0.984531	-0.952727
HDC	0.0193741	0.984531	-1.48411
C15orf41	0.0193918	0.984531	-0.392519
TWSG1	0.0195857	0.984531	0.5096
RP11-43F13.1	0.0196137	0.984531	-0.578216
CFH	0.0196625	0.984531	1.21508
ECHDC2	0.0199575	0.984531	-0.420343
RP11-22B23.1	0.0200334	0.984531	-0.779866
IGKV1-5	0.0200637	0.984531	1.11831
RHOB	0.0201378	0.984531	0.737394
SPRYD3	0.0203675	0.984531	0.512839
HIST1H2BO	0.0203803	0.984531	0.589073
FUT4	0.0204841	0.984531	0.405723
CTDSP1	0.0205157	0.984531	0.413335
RPL3P7	0.0205173	0.984531	2.69871
IGLV3-10	0.0206042	0.984531	1.65924
HIST2H3A	0.0207365	0.984531	0.944495
CDC16	0.0207693	0.984531	-0.393761
N4BP2	0.020795	0.984531	0.277699
MRC1	0.0208078	0.984531	0.98761
SULT1A1	0.0208884	0.984531	-0.777075
RPL3P4	0.0208965	0.984531	1.17882
KLRF1	0.0209506	0.984531	-0.843782
RAD51AP1	0.0210391	0.984531	0.55175
TRIQK	0.02108	0.984531	0.386437
SCIN	0.0211449	0.984531	-1.39357
RPL29	0.0212735	0.984531	0.402224
PTK2	0.0212739	0.984531	-0.416464
NDUFA3	0.0212857	0.984531	0.600231
IRF4	0.0212948	0.984531	0.570562
TMCC1	0.0213731	0.984531	-0.352324
TRAM1	0.0215656	0.985448	0.40992
LINC00936	0.0216173	0.985448	0.435182
FANCC	0.0216534	0.985448	-0.417002
RAB40C	0.021839	0.985448	0.488224
QSOX1	0.0220647	0.985448	0.497277
C5orf15	0.0220761	0.985448	0.388387
DEPDC1	0.0221966	0.985448	0.598657
AVEN	0.0222165	0.985448	0.44105
ZNF71	0.0222244	0.985448	-0.474542
RP11-379F4.4	0.0222353	0.985448	-0.734225
CST7	0.0223186	0.985448	0.726435
CLTCL1	0.0224307	0.985448	0.591913
RP11-298I3.1	0.0224501	0.985448	-0.878791
AL023806.1	0.0225376	0.985448	0.451068
HDX	0.0226128	0.985448	-0.51877
CTD-3099C6.9	0.0227228	0.985448	-0.520325
PRLR	0.0227603	0.985448	-0.901042
TIMM50	0.0229061	0.987814	0.391612
CTD-2233K9.1	0.023004	0.987814	-0.729852
CTD-3092A11.1	0.0231359	0.987814	-1.13258
WDR11-AS1	0.0231374	0.987814	-0.864673
PRC1	0.0232501	0.989177	0.536643
CXCR6	0.0233637	0.989924	0.608692
FUT7	0.0234609	0.989924	0.419944
NDC1	0.023517	0.989924	0.27884
PKIG	0.0235908	0.989924	-0.508682
HMGB3	0.0237879	0.994062	0.778349
RP4-568C11.4	0.0238843	0.994062	1.07906
RASA3	0.0240447	0.994062	-0.322452
snoU2_19	0.0242197	0.994062	0.903373
UBE2G1	0.0242929	0.994062	0.352888
TRAJ38	0.0244359	0.994062	-0.70509
KLHL28	0.0245987	0.994062	0.22521
TMEM107	0.0247253	0.994062	0.465049
PLCG1	0.0247623	0.994062	-0.37773
RNF217	0.0247713	0.994062	0.507878
RP11-26J3.3	0.0248346	0.994062	-0.488433
ALG10	0.024862	0.994062	0.26001
KB-1674E1.1	0.0251148	0.994062	-0.734144
RPTOR	0.0251308	0.994062	-0.456124
AC004381.6	0.0252281	0.994062	0.543868
IGHV4-61	0.025265	0.994062	1.49966
CCL4L1	0.025285	0.994062	1.05902
RPL39L	0.0254506	0.994062	0.522926
MTMR12	0.0255251	0.994062	-0.273065
TNIK	0.0256398	0.994062	-0.399894
LINC01278	0.0256411	0.994062	-0.563376
AGA	0.0257819	0.994062	0.456105
RP11-597D13.9	0.0260337	0.994062	-0.847429
EIF3L	0.0260759	0.994062	0.264881
GRAP2	0.0260924	0.994062	-0.433645
RPL39	0.026116	0.994062	0.698164
TMED10	0.0262084	0.994062	0.326591
TCTEX1D1	0.0262765	0.994062	0.849461
TANGO6	0.0262878	0.994062	-0.26723
HSPA13	0.0263553	0.994062	0.54257
PALLD	0.0264334	0.994062	-0.647378
TGDS	0.0266371	0.994062	0.308336
ZNF221	0.0266452	0.994062	-0.540684
HLA-H	0.0267707	0.994062	-1.14138
IGLV3-25	0.0268933	0.994062	1.36098
CAV2	0.0269072	0.994062	-1.08888
FOS	0.0269118	0.994062	0.519286
SDC1	0.0269432	0.994062	1.37421
GSTCD	0.027173	0.994062	0.307563
ALDH1L2	0.0272685	0.994062	0.908551
RP4-647J21.1	0.0273675	0.994062	-0.698547
HLA-C	0.0274711	0.994062	-0.568283
RNASE2	0.0277818	0.994062	0.813758
GNG11	0.0278636	0.994062	-0.82155
OTUD7B	0.0279461	0.994062	-0.32147
ADCY10	0.0279485	0.994062	-0.630783
TTK	0.0279957	0.994062	0.583143
ALG2	0.0280761	0.994062	0.300388
TRUB1	0.0283589	0.994062	0.258554
CITED2	0.0285196	0.994062	0.398838
CD93	0.028539	0.994062	0.491583
MED31	0.0286494	0.994062	0.323995
PIGL	0.0286613	0.994062	-0.43258
UPF3A	0.0287955	0.994062	-0.33681
CTSG	0.0288044	0.994062	1.96638
CDK1	0.0288479	0.994062	0.5935
IGLV2-14	0.0289562	0.994062	1.15726
ZNF292	0.0289988	0.994062	0.317396
GLRX2	0.0291044	0.994062	0.490927
FAM69A	0.0291103	0.994062	0.438485
SF3B5	0.0293403	0.994062	0.443765
TNPO1	0.0295147	0.994062	0.230346
MS4A2	0.0295413	0.994062	-1.50284
RHEB	0.029684	0.994062	0.297857
SH3RF3	0.0296939	0.994062	-0.680216
ITM2C	0.0298301	0.994062	0.888751
CREB3L4	0.0299874	0.994062	0.429694
RAVER2	0.0300998	0.994062	0.484137
WWC2	0.0301923	0.994062	-0.476809
TOMM22	0.0302043	0.994062	0.396827
MTERF4	0.0302208	0.994062	-0.251347
RP11-403H13.1	0.0302324	0.994062	-0.741404
MBD4	0.0303109	0.994062	0.286971
DYNLL2	0.0303969	0.994062	-0.326431
SEC24A	0.0304293	0.994062	0.36856
DPY19L3	0.0307549	0.994062	0.421794
UGCG	0.0311439	0.994062	0.528258
NUP37	0.0311612	0.994062	0.36688
OSM	0.0313132	0.994062	0.637974
AMD1	0.0313584	0.994062	0.255447
IL10	0.0314012	0.994062	0.996983
PDGFRB	0.0315537	0.994062	-0.89225
MGAT2	0.0315572	0.994062	0.401894
ANKRD18A	0.0316345	0.994062	0.767907
CPNE3	0.0316509	0.994062	0.366121
TDRKH	0.0316632	0.994062	-0.388695
UCK2	0.031943	0.994062	0.367424
TCN1	0.0319826	0.994062	0.863315
CCDC141	0.0321986	0.994062	-0.666937
SLC38A2	0.0323217	0.994062	0.309139
RETN	0.0324925	0.994062	1.2515
RP11-436I9.3	0.0326384	0.994062	-1.12824
BLM	0.0326464	0.994062	0.342738
RPS13	0.0326519	0.994062	0.345404
REEP3	0.032664	0.994062	0.245349
PLP2	0.0327118	0.994062	0.622643
RP11-382J24.2	0.0329501	0.994062	-0.7149
COX6CP17	0.0329639	0.994062	-0.848889
RPL13	0.0330173	0.994062	0.309506
HIST1H2AI	0.0330332	0.994062	0.53484
B3GNT2	0.0332027	0.994062	0.331086
ADD2	0.0334467	0.994062	-0.515923
PPP2R5C	0.0334652	0.994062	-0.222629
MAD1L1	0.0337716	0.994062	-0.281945
RP11-631N16.4	0.0338512	0.994062	0.401786
CENPA	0.0341142	0.994062	0.629106
RP11-556K13.1	0.0341359	0.994062	0.892231
GEMIN8	0.0342828	0.994062	-0.363164
UBE2E2	0.0344539	0.994062	-0.44698
TSHZ2	0.0346158	0.994062	-0.568741
TXNDC9	0.03473	0.994062	0.348728
IL21	0.03477	0.994062	0.852048
LYPLAL1	0.0348029	0.994062	0.338761
SSR1	0.034819	0.994062	0.284333
PTPN22	0.0348593	0.994062	0.277318
IMP3	0.0350639	0.994062	0.42766
CTSD	0.035089	0.994062	0.493034
AMY2B	0.03521	0.994062	-0.431129
TXNDC11	0.0352476	0.994062	0.478247
PARPG1	0.0354062	0.994062	-0.319279
RP11-142C4.6	0.0355078	0.994062	-0.732764
RP11-367G6.3	0.0356125	0.994062	-0.797946
KIAA1257	0.03568	0.994062	-0.676935
SLC35F5	0.0358385	0.994062	0.204962
RPS8	0.0358435	0.994062	0.443272
RP11-35G9.3	0.0358726	0.994062	-0.511129
CTD-2371O3.3	0.0359526	0.994062	0.500171
CLDN12	0.0359629	0.994062	0.560472
PNPO	0.0359656	0.994062	0.410811
UPB1	0.0359734	0.994062	1.01998
BEND2	0.036032	0.994062	-0.94768
WDR11	0.0361286	0.994062	-0.296731
SPCS3	0.0361707	0.994062	0.285064
HIST1H4H	0.036197	0.994062	0.582021
TRIM39	0.0362925	0.994062	-0.287802
ANTXRLP1	0.0363263	0.994062	-0.687171
ZNF211	0.0363527	0.994062	-0.249519
SRGN	0.0364909	0.994062	0.351346
PLEKHJ1	0.0364919	0.994062	0.345183
POLE3	0.0365145	0.994062	0.355687
RTN4	0.0366159	0.994062	0.330794
FADS2	0.0366377	0.994062	0.858241
XKR6	0.0370403	0.994062	-0.664386
STARD9	0.0370777	0.994062	-0.522752
IGHG1	0.0370881	0.994062	1.24218
PDIK1L	0.0370916	0.994062	0.32664
CDC42BPB	0.0371868	0.994062	-0.435887
FBXW4	0.0372972	0.994062	-0.353521
HMGN2	0.0373092	0.994062	0.362933
OXA1L	0.0373687	0.994062	0.252817
RACGAP1	0.0373755	0.994062	0.370254
PIGU	0.0375101	0.994062	0.270116
IFRD1	0.0375734	0.994062	0.291169
C1orf186	0.0376446	0.994062	0.573784
KIAA1324	0.0377156	0.994062	-1.12299
IL11RA	0.037764	0.994062	-0.537359
TRABD2A	0.0379115	0.994062	-0.44178
CA4	0.037933	0.994062	0.643132
PASK	0.0380592	0.994062	-0.354814
GAS6	0.0381981	0.994062	0.570958
RP11-65L3.4	0.0381986	0.994062	-0.471699
MANBAL	0.0382039	0.994062	-0.423465
EPHA1-AS1	0.0385347	0.994062	-0.932873
GRAMD3	0.0385362	0.994062	-0.439438
FIGNL1	0.0386666	0.994062	0.269295
MT-TP	0.0387168	0.994062	-0.641619
SKAP1	0.0387754	0.994062	-0.444898
CBWD7	0.0388464	0.994062	-0.535184
MPZ	0.0388469	0.994062	0.540039
PTCH1	0.0388907	0.994062	-0.59446
LINC01550	0.03907	0.994062	-0.424825
RRN3P1	0.0394382	0.994062	-0.363402
C2orf47	0.039761	0.994062	0.343151
FN3KRP	0.0398477	0.994062	0.430939
TGFBR3	0.0398821	0.994062	-0.473428
RPS3	0.0401411	0.994062	0.388113
AGPAT4	0.0402361	0.994062	-0.420969
RPL27A	0.0402423	0.994062	0.409335
HIST1H4A	0.0403042	0.994062	0.71592
TMX1	0.0403278	0.994062	0.371345
ZNF528	0.0403281	0.994062	-0.535373
SAMD12	0.04037	0.994062	0.775503
KIAA2013	0.0404146	0.994062	0.392191
GPT2	0.0404407	0.994062	0.576799
PAN2	0.040451	0.994062	-0.330873
LRRC58	0.0404677	0.994062	0.203345
ERGIC3	0.0405207	0.994062	0.320561
SAMD3	0.040726	0.994062	-0.402285
ELP3	0.0407429	0.994062	-0.234506
IL10RA	0.0408118	0.994062	-0.282417
FOXN2	0.0408144	0.994062	0.260385
NDUFS8	0.0408146	0.994062	0.479694
DTD2	0.0410061	0.994062	0.307143
TBC1D8	0.0412169	0.994062	-0.450231
DNAJC3-AS1	0.0412183	0.994062	0.486558
CKAP2L	0.0412796	0.994062	0.577803
TRAJ10	0.0413564	0.994062	-0.510364
DONSON	0.0414916	0.994062	0.3262
NME4	0.0415519	0.994062	-0.709668
PKP2	0.0416212	0.994062	0.613184
MAF	0.0417684	0.994062	0.449254
XRCC2	0.0417716	0.994062	0.469075
HIST1H3A	0.0418282	0.994062	0.629778
CD40LG	0.0418446	0.994062	-0.462528
PTAR1	0.0418784	0.994062	0.269623
TTF2	0.0419175	0.994062	-0.425998
CCDC88B	0.041988	0.994062	-0.312913
STT3A	0.0422867	0.994062	0.450714
KCNE1	0.0422964	0.994062	0.556477
SNX29	0.0423436	0.994062	-0.307896
UFM1	0.0424074	0.994062	0.326236
SLC2A9	0.0425982	0.994062	-0.582344
PLEKHA1	0.0426119	0.994062	-0.423454
NUDCD1	0.0426767	0.994062	0.378574
ZSWIM3	0.0428604	0.994062	0.354244
VEGFA	0.0429204	0.994062	0.597441
ADAMTS17	0.0429315	0.994062	0.760399
HPS6	0.0431307	0.994062	0.437572
KIF2C	0.0433534	0.994062	0.558053
TCF19	0.0433559	0.994062	0.563839
SKP2	0.043405	0.994062	0.290693
FBXO5	0.0437545	0.994062	0.3985
GPNMB	0.0439441	0.994062	0.906552
ITGAM	0.0440829	0.994062	0.37278
RP11-799D4.4	0.044311	0.994062	-0.46977
KIF20A	0.0443396	0.994062	0.640841
LIN9	0.0444005	0.994062	0.383868
VAT1	0.0444914	0.994062	0.572127
LINC00869	0.0445356	0.994062	-0.486669
NUMA1	0.0447305	0.994062	-0.25374
MRPL49	0.0449775	0.994062	0.299218
ARL6IP1	0.0450913	0.994062	0.338434
ZNF154	0.0452001	0.994062	-0.362156
RP11-420A23.1	0.0455677	0.994062	-0.515264
LRRC70	0.0456329	0.994062	0.728357
MCFD2	0.045677	0.994062	0.234141
ECT2	0.0456992	0.994062	0.344645
RP11-104L21.3	0.0457488	0.994062	-0.918829
CEACAM4	0.0457505	0.994062	0.518674
THAP9	0.0457609	0.994062	0.29162
SOCS5	0.0458465	0.994062	0.287557
GOLT1B	0.0458743	0.994062	0.334762
SGOL2	0.0458928	0.994062	0.475225
RP11-1094M14.5	0.045999	0.994062	-0.683227
ZEB2	0.0460918	0.994062	-0.278276
NHP2	0.046161	0.994062	0.38045
DSTN	0.0462286	0.994062	0.334433
YWHAH	0.0462544	0.994062	0.430201
PDRG1	0.0463776	0.994062	0.442695
PPARD	0.0463779	0.994062	-0.49047
GRAMD1B	0.0464758	0.994062	-1.07122
BCO2	0.0467088	0.994062	-0.586097
TMED4	0.0469184	0.994062	0.258805
CADM1	0.0469989	0.994062	0.7194
DTL	0.0470093	0.994062	0.422586
DNAH6	0.0471171	0.994062	-0.501154
HIST1H4L	0.0471507	0.994062	0.618428
CD300E	0.0472493	0.994062	-0.524732
HAUS2	0.0472655	0.994062	0.286251
CTD-3022L24.1	0.0474188	0.994062	-0.67934
GEMIN7	0.0475015	0.994062	0.356646
RP5-857K21.6	0.0475032	0.994062	-2.43871
VAV2	0.0477965	0.994062	-0.38196
PEBP1	0.0478884	0.994062	0.416559
CAV1	0.0479549	0.994062	0.869316
RP11-335I12.2	0.0479596	0.994062	0.674256
NSUN5P2	0.0480353	0.994062	-0.539623
AC079922.3	0.0481376	0.994062	-0.535621
THEMIS	0.0481882	0.994062	-0.349594
INADL	0.0483458	0.994062	-0.347895
RPLP0	0.0483899	0.994062	0.37012
RORA	0.0483927	0.994062	-0.322201
BUB1B	0.0483956	0.994062	0.561793
KIAA1715	0.0484025	0.994062	0.307343
SLC41A2	0.0484133	0.994062	0.502308
STMN1	0.0484973	0.994062	0.530648
TRABD	0.0485182	0.994062	0.42028
SWI5	0.0486174	0.994062	0.416333
MAN1C1	0.0488138	0.994062	-0.412811
LINC00152	0.0489642	0.994062	0.471221
CAPN10-AS1	0.0492303	0.994062	0.291139
ZNF717	0.049444	0.994062	-0.360632
CTD-2506J14.1	0.0495859	0.994062	-0.490886
CKAP4	0.0497435	0.994062	0.482075
ARMC1	0.0498191	0.994062	0.22906
KIAA1524	0.0498446	0.994062	0.39571
FGFBP2	0.0499577	0.994062	-0.492036
TRMT10A	0.0500102	0.994062	0.417405
PKM	0.0500684	0.994062	0.435635
COX7A2	0.0501432	0.994062	0.496448
TEX2	0.0502132	0.994062	0.364289
THBD	0.0502981	0.994062	0.530924
GNAZ	0.0504577	0.994062	-0.724615
AC009506.1	0.0505871	0.994062	0.468734
LBR	0.0506343	0.994062	0.286883
HIST1H4F	0.050771	0.994062	0.584227
PCSK5	0.0508641	0.994062	-0.503509
CTNS	0.0510342	0.994062	0.341839
AP000783.1	0.0510358	0.994062	-1.11308
NUF2	0.051173	0.994062	0.510855
IGKV3-20	0.0514963	0.994062	0.955929
TBC1D22A	0.0515763	0.994062	-0.237821
IRF2BP2	0.0517576	0.994062	0.285333
ARHGEF10L	0.0518284	0.994062	-0.572023
LRP1	0.0518328	0.994062	-0.643424
KLHL3	0.0519166	0.994062	-0.521507
CCL4	0.0519353	0.994062	0.859887
TTLL7	0.0520167	0.994062	-0.544102
NCK2	0.0520195	0.994062	-0.317474
RSAD1	0.0521348	0.994062	-0.297399
CALCOCO2	0.0522666	0.994062	-0.417473
CLMN	0.052423	0.994062	-0.407801
TMEM68	0.0530073	0.994062	0.234205
MIR155HG	0.0530425	0.994062	0.589229
RP11-102M11.1	0.0531604	0.994062	-0.487122
TPM3P7	0.053175	0.994062	-0.703786
S1PR5	0.0531908	0.994062	-0.615698
HIST1H2AD	0.0533035	0.994062	0.450022
UBE2T	0.0533603	0.994062	0.533775
GPR89A	0.0534294	0.994062	-0.347947
AKR1B1	0.0536096	0.994062	0.385347
COPRS	0.0536396	0.994062	0.449845
OPN3	0.0536826	0.994062	0.295264
MRPL9	0.0536896	0.994062	0.33116
GRK5	0.0536983	0.994062	-0.316651
IGLC2	0.053866	0.994062	0.914058
PTPRM	0.0538825	0.994062	-0.569068
GATC	0.0541691	0.994062	0.22717
AC093673.5	0.0542151	0.994062	0.382607
ATP11B	0.0542286	0.994062	0.280023
LRRC25	0.054415	0.994062	0.486607
MAGI2-AS3	0.0544464	0.994062	-0.822444
RP11-426D19.1	0.0545811	0.994062	-0.604492
BCR	0.0546526	0.994062	-0.306471
ZNF860	0.0546843	0.994062	-0.490063
NGLY1	0.0547759	0.994062	0.159985
PANK2	0.0548156	0.994062	-0.23163
DMWD	0.0548232	0.994062	0.553658
ZBTB38	0.0550037	0.994062	0.251018
ZMPSTE24	0.0550128	0.994062	0.239289
ELL2	0.0550806	0.994062	0.453565
VTA1	0.0551849	0.994062	0.237158
CSF1	0.0552637	0.994062	0.602764
TCF7	0.0552919	0.994062	-0.578788
HERC2	0.0553586	0.994062	-0.361471
KPNA2	0.055442	0.994062	0.378151
PACSIN2	0.0556017	0.994062	-0.301862
FAM63B	0.0556343	0.994062	0.277638
ZNFX1	0.0556368	0.994062	-0.334672
SRPRB	0.0556413	0.994062	0.433536
TCTN1	0.0557322	0.994062	-0.862972
LSM7	0.055747	0.994062	0.379705
PNPLA1	0.0557889	0.994062	0.504957
PGPEP1	0.0559132	0.994062	0.422137
GNG5	0.0559861	0.994062	0.323979
CXCL5	0.0559875	0.994062	-1.03677
FBXO21	0.0559969	0.994062	-0.249049
SCARNA2	0.0561619	0.994062	0.553642
STAT6	0.0565489	0.994062	-0.220489
WDR83OS	0.0565685	0.994062	0.626553
ZNF12	0.0565914	0.994062	0.228838
PDE5A	0.0566294	0.994062	-0.678949
PPP3R1	0.0566769	0.994062	-0.515967
PDZD8	0.056687	0.994062	0.349717
AC137934.1	0.0567557	0.994062	-1.80498
IGHA1	0.0567613	0.994062	1.16265
GSTP1	0.0567778	0.994062	0.342938
GPR171	0.0569952	0.994062	0.438
ZNF770	0.057112	0.994062	0.271993
TAF4	0.0571638	0.994062	-0.55073
SPON2	0.0571804	0.994062	-0.482639
POLR3G	0.0571896	0.994062	0.424545
S1PR4	0.0572278	0.994062	0.449962
GPR82	0.0574055	0.994062	0.58075
CNR1	0.0574735	0.994062	0.673682
PHC1	0.0575311	0.994062	-0.424641
ZNF354B	0.0575358	0.994062	-0.310223
PCSK7	0.0576764	0.994062	-0.242716
C11orf71	0.0576894	0.994062	0.360544
GLDN	0.0577401	0.994062	1.1578
ING2	0.0577744	0.994062	0.399728
NAA50	0.0578046	0.994062	0.218114
RP11-415F23.4	0.0579259	0.994062	-0.550896
SMARCB1	0.0580314	0.994062	0.390376
SCD	0.0581365	0.994062	0.604477
LINC00402	0.0582258	0.994062	-0.636447
ORAI1	0.0583617	0.994062	0.524875
LIPT1	0.058377	0.994062	-0.369923
TMEM258	0.0584784	0.994062	0.520674
SCML4	0.0586013	0.994062	-0.382912
ZNF540	0.0586575	0.994062	-0.39698
TKT	0.0587599	0.994062	0.371238
ZBTB41	0.0587969	0.994062	0.266735
RPS14	0.0588885	0.994062	0.436131
ZNF350	0.0588934	0.994062	-0.259267
STEAP4	0.058938	0.994062	0.442511
SLC37A3	0.0589867	0.994062	0.358488
SERPINB1	0.0589994	0.994062	0.491783
RP11-216N14.7	0.0591346	0.994062	-0.555428
ASPH	0.0591632	0.994062	0.44213
BRWD3	0.0592816	0.994062	-0.315424
FAM132B	0.0593452	0.994062	2.22826
PSMB2	0.0594057	0.994062	0.327253
RNU11	0.059441	0.994062	0.950065
CCNA2	0.0594952	0.994062	0.533835
TOR3A	0.0595096	0.994062	0.370127
CD177	0.0595546	0.994062	1.16831
IGLV3-19	0.0596841	0.994062	1.0007
CDCA8	0.0597984	0.994062	0.540384
ZNF880	0.059888	0.994062	-0.3808
FAM122C	0.0599088	0.994062	-0.376954
AMPD3	0.0599106	0.994062	0.417527
KCNN3	0.0600643	0.994062	0.713879
NFATC2	0.0600904	0.994062	-0.347244
RGS10	0.0601336	0.994062	-0.493995
ZNF236	0.0602391	0.994062	-0.198999
RP11-996F15.2	0.0602451	0.994062	-0.507407
GPR56	0.060423	0.994062	-0.680379
KCTD3	0.0604569	0.994062	0.312548
SMC2	0.0604646	0.994062	0.359607
NXT2	0.0605079	0.994062	0.406186
NR1D2	0.0605419	0.994062	-0.356894
PAXIP1-AS2	0.0607578	0.994062	-0.304096
SLC30A5	0.0607844	0.994062	0.262793
LINC00662	0.0607884	0.994062	0.322831
KIAA1324L	0.0607965	0.994062	-0.569139
RPS27	0.0608764	0.994062	0.478749
MAP3K4	0.0608914	0.994062	-0.24227
XPOT	0.0609701	0.994062	0.240905
ERLEC1	0.0610135	0.994062	0.430295
RP11-4O1.2	0.0610172	0.994062	-0.401717
CHMP4BP1	0.0611579	0.994062	-0.564333
LINC01504	0.0612927	0.994062	-0.525153
TMEM170B	0.0613518	0.994062	0.367301
FLNA	0.0614872	0.994062	-0.399137
GABARAPL1	0.061512	0.994062	0.400705
EEF1A1P13	0.0615747	0.994062	0.6604
CEP128	0.0615759	0.994062	0.444023
LDB1	0.0616387	0.994062	-0.257347
C20orf197	0.0617239	0.994062	-0.706552
RPL28	0.0618079	0.994062	0.515104
PRRC1	0.0618762	0.994062	0.284173
ADORA3	0.0619894	0.994062	0.697437
IGKV1D-13	0.0621567	0.994062	1.84599
MZT1	0.0622	0.994062	0.426216
OAT	0.0622493	0.994062	0.399844
TRAJ31	0.0622749	0.994062	-0.509519
LYRM4	0.062364	0.994062	0.3314
KIAA0101	0.0624989	0.994062	0.561037
SLC16A3	0.0626053	0.994062	0.266743
HIST1H2AE	0.062674	0.994062	0.473843
MAD2L1	0.0628274	0.994062	0.482683
DGCR14	0.0629457	0.994062	-0.252075
FRRS1	0.0630717	0.994062	0.507031
RP1-193H18.2	0.0631195	0.994062	0.460314
RP3-453I5.2	0.0631239	0.994062	-0.660371
TOR1AIP1	0.0634665	0.994062	0.203078
EME1	0.063538	0.994062	0.50964
IPO9	0.0636364	0.994062	-0.307427
PRSS23	0.0636614	0.994062	-0.667966
PSMD14	0.0636731	0.994062	0.342755
ATP6AP2	0.0637011	0.994062	0.299256
BCAT1	0.0637465	0.994062	0.437988
CENPJ	0.0639004	0.994062	0.286353
COPE	0.0639488	0.994062	0.383923
OLR1	0.0642295	0.994062	1.09509
DNAH12	0.0643282	0.994062	-0.706137
RP11-568N6.1	0.0643732	0.994062	0.551558
FRY	0.064451	0.994062	-0.508538
ADARB1	0.0644609	0.994062	-0.409588
UNG	0.0644654	0.994062	0.352822
BNC2	0.0644821	0.994062	-0.934862
ARMC2	0.0645091	0.994062	-0.331316
RGS12	0.0645898	0.994062	-0.552858
DUT	0.0646408	0.994062	0.356358
BARD1	0.0647939	0.994062	0.284011
ADRBK2	0.064844	0.994062	-0.289329
DUSP2	0.0649595	0.994062	0.536768
MED22	0.0649894	0.994062	0.299254
RAB11FIP3	0.0650544	0.994062	-0.359781
TOP2A	0.0652929	0.994062	0.492237
HIST1H3G	0.0652954	0.994062	0.546046
SDF2	0.0653076	0.994062	0.278738
ERCC6L	0.0653287	0.994062	0.418213
PLEKHO1	0.0654027	0.994062	-0.33089
MAGT1	0.065412	0.994062	0.328678
FEM1B	0.0654871	0.994062	0.180669
CA5B	0.0656982	0.994062	-0.37121
PA2G4P4	0.065836	0.994062	-0.44444
TIPIN	0.0660276	0.994062	0.423243
SH3BP1	0.0660577	0.994062	0.410527
SMNDC1	0.0661565	0.994062	0.2362
SLC46A2	0.0661789	0.994062	-0.669065
RP1-152L7.5	0.0661846	0.994062	0.731415
NABP2	0.0662231	0.994062	0.424371
GK-IT1	0.0663255	0.994062	-0.780666
AC009120.3	0.0663867	0.994062	-0.535419
ACP6	0.0666322	0.994062	0.517967
LAG3	0.066652	0.994062	0.938741
ARF5	0.0666785	0.994062	0.340224
CAND1	0.0667083	0.994062	0.193234
DHODH	0.0667263	0.994062	-0.356377
MAGED1	0.066941	0.994062	0.530583
OSCAR	0.066963	0.994062	0.370025
TEX30	0.067004	0.994062	0.401304
TIAM2	0.0670167	0.994062	-0.360367
MTR	0.0670508	0.994062	-0.212073
SLC2A14	0.0670679	0.994062	1.34503
TTN	0.0670988	0.994062	-0.546211
C1GALT1C1	0.0671737	0.994062	0.372777
NBPF14	0.0671834	0.994062	-0.526835
MIR222HG	0.0671939	0.994062	0.5544
RP11-712B9.2	0.0672396	0.994062	-0.682009
RUFY2	0.0673407	0.994062	-0.215738
KIF23	0.0674332	0.994062	0.446004
PHPT1	0.0674397	0.994062	0.485081
CCDC102A	0.0674656	0.994062	-0.459154
PPT1	0.067521	0.994062	-0.380794
PRKRA	0.0675394	0.994062	0.199298
CEP95	0.0677584	0.994062	-0.2037
VPS45	0.067792	0.994062	-0.203348
ATP6V0B	0.0678489	0.994062	0.275026
PGM3	0.0679401	0.994062	0.297825
CAT	0.0679461	0.994062	0.363774
IGJ	0.0679556	0.994062	0.968172
ELMOD2	0.0680013	0.994062	0.292613
IBA57	0.0680142	0.994062	-0.385074
MAML2	0.0680622	0.994062	-0.453462
PHLDB2	0.0681968	0.994062	-0.476522
BRI3	0.0683141	0.994062	0.257462
ISOC1	0.06839	0.994062	0.300012
PEX14	0.0684795	0.994062	-0.361711
SPC24	0.0685335	0.994062	0.639841
UNK	0.0686345	0.994062	-0.351905
IGFBP7	0.0687005	0.994062	0.409912
SREBF1	0.0688099	0.994062	0.359575
LEF1	0.0689905	0.994062	-0.369297
MRPL32	0.069155	0.994062	0.342046
GDF7	0.0691883	0.994062	-0.749606
RPLP1	0.0692509	0.994062	0.358326
RAB13	0.0693763	0.994062	0.574435
ST3GAL5	0.0694985	0.994062	-0.315676
INSIG2	0.0697889	0.994062	0.269698
ASPRV1	0.0698245	0.994062	-0.87833
RPAP3	0.0698775	0.994062	-0.27153
RPS6KA4	0.0699002	0.994062	-0.37594
CDKN2B-AS1	0.0699675	0.994062	-0.616916
TRAV13-1	0.0700562	0.994062	-0.579188
ZKSCAN1	0.0700691	0.994062	-0.189169
RP11-213G2.1	0.070162	0.994062	-0.490139
RP11-640L9.2	0.0703733	0.994062	-0.738208
VPS37A	0.0703937	0.994062	0.176419
CCDC144A	0.0705483	0.994062	-2.05752
ORMDL2	0.0707165	0.994062	0.263247
MAOA	0.0709114	0.994062	-1.3682
ZSCAN25	0.0710652	0.994062	-0.225164
MANEA-AS1	0.071079	0.994062	0.336722
LAMP2	0.071118	0.994062	0.219082
S100Z	0.0711414	0.994062	-0.682934
SASH1	0.0711847	0.994062	-0.642198
IGKV3-11	0.0714336	0.994062	0.698825
EVC2	0.0714372	0.994062	-0.402547
RPL4	0.071662	0.994062	0.267804
TMEM59	0.071675	0.994062	0.291379
MRPS27	0.0717213	0.994062	0.199693
SUMO1P1	0.0719576	0.994062	0.474981
RP11-115C21.2	0.0720721	0.994062	0.471035
RP11-43D4.3	0.0721644	0.994062	-0.733308
MTX3	0.0724466	0.994062	0.226132
CD46P1	0.0726138	0.994062	-0.529481
RNF130	0.0726584	0.994062	0.367607
GJB6	0.0726674	0.994062	1.30098
NFE2L3	0.0727262	0.994062	0.414968
ARHGAP35	0.0728202	0.994062	-0.270321
EMC7	0.0730372	0.994062	0.329236
PLCB1	0.0730489	0.994062	-0.365726
ZNF502	0.0734829	0.994062	-0.409887
GK5	0.0735094	0.994062	-0.435945
CNST	0.0738421	0.994062	-0.228091
RP11-428G5.5	0.0741181	0.994062	-0.720846
C5orf24	0.0742172	0.994062	0.205044
CHI3L1	0.0745057	0.994062	1.03515
TNRC6A	0.0746459	0.994062	-0.234685
DIS3L2	0.0746745	0.994062	-0.309979
HIST1H2BE	0.0747046	0.994062	0.477131
SETD8	0.0748337	0.994062	0.262727
MAN2C1	0.074868	0.994062	-0.361892
C9orf69	0.0748739	0.994062	0.263717
TRIP13	0.0749951	0.994062	0.538748
TNFSF4	0.07503	0.994062	-0.632913
ASPM	0.0751445	0.994062	0.407265
P2RX1	0.0752464	0.994062	0.571787
SP100	0.0752516	0.994062	-0.277111
SSNA1	0.0752926	0.994062	0.45902
ACTR10	0.0753161	0.994062	0.243227
AGMAT	0.0753374	0.994062	0.33038
RN7SKP71	0.0753579	0.994062	1.13172
SEPHS1	0.0754764	0.994062	0.308801
TMEM140	0.0755073	0.994062	-0.366967
SMUG1	0.0755159	0.994062	0.274912
PARM1	0.0755219	0.994062	0.631824
TRIT1	0.0755945	0.994062	-0.243505
CITF22-49E9.3	0.0756509	0.994062	0.341891
NDUFB5	0.0756903	0.994062	0.273762
GUCY1A3	0.075731	0.994062	-0.582852
RNASEH2A	0.0757968	0.994062	0.421277
WASH3P	0.0758976	0.994062	-0.442646
ERLIN2	0.0759773	0.994062	0.317974
ZRANB2	0.0759992	0.994062	0.246451
KLHL23	0.0762614	0.994062	0.484811
ASCC3	0.0762946	0.994062	0.288386
RP11-727A23.4	0.0763404	0.994062	0.327776
CXCR2P1	0.0766	0.994062	-0.877204
NAPSB	0.0766264	0.994062	-0.367697
CNIH1	0.0770946	0.994062	0.227363
TRMT112	0.0770972	0.994062	0.359294
HVCN1	0.0771473	0.994062	-0.389893
RUFY1	0.0772063	0.994062	-0.353429
APOBEC3A	0.0772722	0.994062	-0.284445
COA4	0.0774101	0.994062	0.319491
TPD52	0.0775978	0.994062	0.319211
GAS2L3	0.0776397	0.994062	0.368219
KBTBD11	0.0776766	0.994062	0.442198
F13A1	0.0782404	0.994062	-0.609926
RP11-353N4.6	0.078678	0.994062	-0.594372
MIR17HG	0.0787137	0.994062	0.289233
STX8	0.0787245	0.994062	0.249212
ITGB2	0.0787286	0.994062	-0.3253
DRICH1	0.0788412	0.994062	-0.586154
AC017035.2	0.0788501	0.994062	-0.57781
TSN	0.0788619	0.994062	0.260595
FCRL6	0.078876	0.994062	-0.662423
FZD6	0.0790364	0.994062	0.510176
KIF11	0.0791006	0.994062	0.472585
ALG10B	0.0791795	0.994062	0.243491
CMTM6	0.0791946	0.994062	0.200727
RPS11	0.0792153	0.994062	0.334317
TMEM180	0.0792572	0.994062	0.560539
BTBD3	0.0794051	0.994062	0.272158
ENKUR	0.0794906	0.994062	-0.885332
PYCR2	0.0795738	0.994062	0.328705
SEL1L	0.0795753	0.994062	0.218047
CTB-61M7.2	0.0795787	0.994062	0.647544
LOXL2	0.0797082	0.994062	-0.477063
ERP44	0.0798177	0.994062	0.211309
RP5-1115A15.1	0.0799044	0.994062	-0.640072
PLEKHG7	0.0802005	0.994062	-0.483354
TMEM204	0.0802859	0.994062	-0.51036
SATB1-AS1	0.0803439	0.994062	-0.339314
MFF	0.0803833	0.994062	0.2029
CSF1R	0.0803896	0.994062	-0.527899
RP11-1277A3.2	0.080471	0.994062	-0.447894
TRAM2	0.0804723	0.994062	0.479003
AC011816.1	0.0804914	0.994062	-0.635993
HP	0.0805144	0.994062	0.962081
ABRACL	0.0805655	0.994062	0.280822
UBE2A	0.0806883	0.994062	0.280068
ZCWPW1	0.0807429	0.994062	-0.346297
SMC4	0.0807713	0.994062	0.277297
GFI1	0.0807946	0.994062	0.394378
UQCRFS1	0.0808113	0.994062	0.259395
LILRA6	0.0808687	0.994062	0.432871
LSM8	0.0809059	0.994062	0.258756
APOL2	0.080919	0.994062	-0.473931
HMGN2P5	0.0809821	0.994062	0.408902
TCL6	0.0810777	0.994062	-0.628889
METTL7B	0.0811556	0.994062	0.902659
TMEM39A	0.0812971	0.994062	0.218763
ALG8	0.0815325	0.994062	0.229196
LMAN1	0.0816259	0.994062	0.422682
ARPC4	0.0817948	0.994062	0.276533
TRAV21	0.0819073	0.994062	-0.598286
CD69	0.08203	0.994062	0.543306
ARNTL2	0.0820757	0.994062	0.517264
HIST1H2AB	0.0820763	0.994062	0.535377
C9orf89	0.0822047	0.994062	0.437152
RP4-714D9.5	0.0822391	0.994062	-0.617082
RPS15AP10	0.0824495	0.994062	-0.488996
TAF15	0.0825521	0.994062	-0.279795
STT3B	0.0826294	0.994062	0.233154
IPO5	0.0826427	0.994062	0.193058
STK39	0.0826573	0.994062	-0.274985
ST14	0.0827665	0.994062	0.557012
TOX4	0.0828673	0.994062	-0.213039
C19orf38	0.0829482	0.994062	0.294679
HERC1	0.0831359	0.994062	-0.283892
NT5C3B	0.0831669	0.994062	0.481015
EHMT2	0.0833649	0.994062	-0.314145
C12orf29	0.0835062	0.994062	0.270953
TRIM38	0.0835169	0.994062	-0.273873
NSUN5P1	0.083556	0.994062	-0.420509
DBN1	0.0837134	0.994062	0.443424
NIPA2	0.0837824	0.994062	0.204713
CASC5	0.0839734	0.994062	0.401149
PCNT	0.0839754	0.994062	-0.265518
SUV39H2	0.0840035	0.994062	0.337707
TRBV28	0.0844856	0.994062	-0.469761
RP11-888D10.4	0.0844948	0.994062	0.329234
AL118506.2	0.0845086	0.994062	-0.813598
CYC1	0.0846073	0.994062	0.348263
LTB4R	0.0846683	0.994062	0.421193
CCNA1	0.0848014	0.994062	1.09023
AL662800.1	0.0848723	0.994062	0.347092
GNB5	0.0849131	0.994062	-0.267461
MRPS18A	0.0849182	0.994062	0.350577
HMMR	0.0849975	0.994062	0.604072
RP11-697N18.4	0.0854155	0.994062	-0.546524
DIABLO	0.0855092	0.994062	-0.255775
FKBP9	0.0855096	0.994062	0.492489
ENC1	0.0856836	0.994062	-0.58722
NDUFB4	0.085733	0.994062	0.317821
RPS18	0.0858092	0.994062	0.433773
PPIH	0.0858727	0.994062	0.322518
PIM2	0.0859079	0.994062	0.36389
PAX5	0.0860885	0.994062	-0.397411
RPL23AP82	0.0862802	0.994062	-0.337618
ATF4	0.0864957	0.994062	0.284499
RP11-147L13.8	0.0866468	0.994062	-0.513003
ARHGEF28	0.0870526	0.994062	-0.871045
FCER1A	0.0870645	0.994062	-1.36383
CDCA2	0.087245	0.994062	0.490361
MPG	0.0872545	0.994062	0.350659
ZNF689	0.0875279	0.994062	-0.271733
UBE2S	0.0876117	0.994062	0.452095
NBPF26	0.0877576	0.994062	-0.790212
AAR2	0.0878429	0.994062	0.287588
ZNRD1	0.0878445	0.994062	0.346941
RP11-327F22.6	0.0878495	0.994062	-0.623887
DNAH7	0.0880079	0.994062	-0.588912
PIBF1	0.0880425	0.994062	0.236189
CDK11B	0.088155	0.994062	-0.25937
MRPL19	0.0885455	0.994062	0.202109
RNPEPL1	0.088591	0.994062	0.386645
SIGLEC7	0.0887174	0.994062	0.358502
SHMT1	0.0888071	0.994062	0.37828
MEX3C	0.0890268	0.994062	0.179597
RP11-6I2.3	0.0890599	0.994062	-0.722396
ZGRF1	0.0890663	0.994062	0.235964
TIMM44	0.0891673	0.994062	0.356965
COPB1	0.0891778	0.994062	0.18737
RP4-756H11.5	0.0892128	0.994062	-0.404152
RPL18	0.0892865	0.994062	0.294355
PHRF1	0.0893217	0.994062	-0.269996
RPS2	0.0893332	0.994062	0.300328
TMED2	0.0894225	0.994062	0.343202
HGF	0.0895071	0.994062	0.631447
CLIP4	0.0895166	0.994062	-0.274021
CEACAM3	0.0895851	0.994062	0.370204
RPN1	0.0896778	0.994062	0.366666
SGMS2	0.0897172	0.994062	0.41781
ALS2CR12	0.0897879	0.994062	-0.701084
NIN	0.089803	0.994062	-0.206107
RP11-640L9.1	0.090058	0.994062	-0.666986
AC147651.4	0.090105	0.994062	0.651054
GAPDH	0.0901304	0.994062	0.327637
CRTC3	0.0901763	0.994062	-0.339275
DENND5A	0.0903775	0.994062	-0.240628
NT5E	0.0906983	0.994062	0.658175
RGS6	0.0910489	0.994062	-0.655472
ANKRD20A5P	0.0910548	0.994062	-0.535982
RRN3P2	0.0910926	0.994062	-0.300738
RNU6ATAC24P	0.0911171	0.994062	-0.456771
AGPAT4-IT1	0.0912432	0.994062	-0.533512
AC109826.1	0.0912655	0.994062	-0.432119
NOB1	0.0913043	0.994062	0.318596
TRIB1	0.0913316	0.994062	0.387205
PEX11B	0.0915153	0.994062	0.252337
ING1	0.0915784	0.994062	-0.19318
SUCNR1	0.0919426	0.994062	0.498302
ARHGDIA	0.0919735	0.994062	0.340973
POLR2J3	0.0919921	0.994062	0.432029
ZNF416	0.0919926	0.994062	-0.293316
CASD1	0.0920416	0.994062	0.217323
BUB1	0.0920595	0.994062	0.457677
WDR81	0.0921782	0.994062	-0.283762
TTC16	0.0923386	0.994062	-0.656132
RNF40	0.0923833	0.994062	-0.213105
RPS6	0.0924655	0.994062	0.418835
RER1	0.0928642	0.994062	0.181178
SLC2A3P2	0.0929355	0.994062	-0.761642
FLNB	0.093103	0.994062	-0.363389
SIRPA	0.0931044	0.994062	0.318612
AP5M1	0.0932684	0.994062	0.212744
VASH1	0.0933005	0.994062	-0.572218
SNRK	0.093398	0.994062	-0.21325
HTT	0.0934316	0.994062	-0.296015
SEC14L4	0.0935563	0.994062	-1.29441
BCL9L	0.0939389	0.994062	-0.595875
PF4V1	0.0940761	0.994062	-0.856052
ECI2	0.0943456	0.994062	0.272549
RNF139-AS1	0.0943966	0.994062	0.363611
IER3	0.094409	0.994062	0.508544
ERMP1	0.0944402	0.994062	0.261663
TSPO	0.0945371	0.994062	0.348218
CH17-118O6.2	0.0946319	0.994062	-0.529105
ASAP2	0.0947612	0.994062	-0.545402
AFF3	0.0947899	0.994062	-0.425986
CHD8	0.0948101	0.994062	-0.22334
CTNND1	0.0948166	0.994062	-0.393233
NSUN7	0.0948279	0.994062	0.497314
AP3S1	0.094848	0.994062	0.239528
SPEF2	0.0948922	0.994062	-0.433223
SRD5A1	0.0948955	0.994062	-0.353692
IGLV3-21	0.0949161	0.994062	0.972827
SIMC1	0.0949545	0.994062	-0.346286
DALRD3	0.0949638	0.994062	0.371141
CCNB1	0.0950584	0.994062	0.442645
TBP	0.0952568	0.994062	-0.263155
SLC35B2	0.0953386	0.994062	0.333304
BIN3	0.0954615	0.994062	-0.209794
TRDC	0.0954627	0.994062	0.551278
CUL9	0.0955901	0.994062	-0.29825
C14orf166	0.0956263	0.994062	0.194092
HIST1H2BF	0.0956503	0.994062	0.3786
G6PD	0.0957352	0.994062	0.313543
RPL10A	0.0957814	0.994062	0.29947
POLG2	0.095837	0.994062	-0.23831
CD300C	0.095856	0.994062	-0.440557
NAT10	0.0959905	0.994062	-0.215166
SNHG7	0.0959963	0.994062	0.33593
MRPS16	0.0960807	0.994062	0.250039
DNM2	0.0962465	0.994062	0.178226
PPM1D	0.0962582	0.994062	0.235788
VNN1	0.0962645	0.994062	0.5355
ARG1	0.0963019	0.994062	0.808449
MRPL15	0.0964606	0.994062	0.405867
BTG3	0.0966737	0.994062	0.293541
UBE2J1	0.0967074	0.994062	0.335773
UQCR10	0.0967732	0.994062	0.401625
MDN1	0.0967911	0.994062	-0.281288
NCAPG	0.0969274	0.994062	0.424954
MTSS1	0.0970192	0.994062	-0.433223
PPP1R15B	0.0971414	0.994062	0.151773
CCDC112	0.0972279	0.994062	0.380023
FGFR1OP	0.097365	0.994062	-0.27662
EIF2AK3	0.0973808	0.994062	0.273756
ZNF16	0.097389	0.994062	-0.298273
SMAD7	0.097416	0.994062	0.449101
FOLR3	0.0975175	0.994062	0.974078
TRAPPC3L	0.0979259	0.994062	-0.737645
MRI1	0.0981362	0.994062	0.299304
NET1	0.0982028	0.994062	0.460795
EIF3M	0.0982325	0.994062	0.190208
RP11-85G21.3	0.0982432	0.994062	-1.17465
MZB1	0.0982475	0.994062	0.824401
AGAP4	0.0982586	0.994062	-0.48616
HIST1H2BH	0.0983348	0.994062	0.452126
ZNF235	0.0984499	0.994062	-0.215052
PREB	0.0985156	0.994062	0.262939
HIST1H2BI	0.0985534	0.994062	0.50531
DDOST	0.0986607	0.994062	0.343393
USP32	0.0986908	0.994062	-0.195457
RP11-798M19.3	0.098734	0.994062	0.475239
TMEM14C	0.0988183	0.994062	0.448645
AC012358.8	0.098935	0.994062	-0.493564
HIST1H4C	0.0989357	0.994062	0.513459
AC007556.3	0.0989698	0.994062	0.44463
HIRA	0.0990183	0.994062	-0.368003
NUSAP1	0.0991243	0.994062	0.408091
CCDC59	0.0991257	0.994062	0.302341
HYAL2	0.099224	0.994062	0.461552
MYLK	0.0995114	0.994062	-0.596166
UQCRHL	0.0998839	0.994062	0.52689
MSRB3	0.0999771	0.994062	0.42915
TMBIM6	0.100008	0.994062	0.175214
CIPC	0.100035	0.994062	0.294722
PTX3	0.100057	0.994062	0.782787
RHNO1	0.100077	0.994062	0.327341
ZNF852	0.100342	0.994062	-0.279519
SDHAF1	0.100361	0.994062	0.3391
OSTC	0.100408	0.994062	0.36729
NUPL1	0.100446	0.994062	0.172244
TTC7A	0.100449	0.994062	-0.240446
FAM103A1	0.100467	0.994062	0.281029
C8orf44	0.100518	0.994062	-0.364416
FAM35A	0.100537	0.994062	0.20727
RPSAP58	0.100594	0.994062	0.660302
ANKRD28	0.100608	0.994062	0.317574
TM7SF3	0.100702	0.994062	0.207036
POLR2E	0.100707	0.994062	0.338712
TTC12	0.100789	0.994062	-0.328096
AC093642.5	0.100822	0.994062	-0.44016
TTC31	0.100941	0.994062	-0.287344
RP11-441O15.3	0.101051	0.994062	-0.431901
CD27	0.101075	0.994062	0.507422
SP140	0.101106	0.994062	-0.363026
ZNF367	0.10116	0.994062	0.322027
DSE	0.10118	0.994062	0.28969
SSR2	0.101355	0.994062	0.30351
CAPZA1	0.101361	0.994062	0.250433
NBPF9	0.101363	0.994062	-0.397524
TRAJ18	0.101393	0.994062	-0.460504
CDC42	0.101473	0.994062	0.268239
ATP6AP1L	0.101668	0.994062	-0.400449
TIGD6	0.101731	0.994062	0.355923
MED30	0.101839	0.994062	0.282964
RP11-117N2.2	0.101857	0.994062	-0.630681
GYS1	0.101913	0.994062	0.364882
KIAA0141	0.101946	0.994062	-0.295181
TP53INP1	0.102037	0.994062	0.299131
MRPL20	0.102058	0.994062	0.366881
CBY1	0.102118	0.994062	0.303218
MYH3	0.102164	0.994062	-0.342901
MMP24-AS1	0.102256	0.994062	-0.316698
RP11-547D13.1	0.102262	0.994062	0.400165
SLC25A38	0.102305	0.994062	-0.331784
IPO5P1	0.102368	0.994062	-0.393846
AC018442.1	0.102525	0.994062	-0.398184
SGSM3	0.102527	0.994062	-0.243159
ZMYM1	0.102535	0.994062	0.207798
MAP2K6	0.102551	0.994062	0.361736
CENPU	0.102686	0.994062	0.447994
RPS29	0.102719	0.994062	0.383684
FYN	0.102754	0.994062	-0.222052
COL4A3	0.102769	0.994062	-0.471677
TAS2R64P	0.102828	0.994062	0.694083
FSTL1	0.103115	0.994062	-0.710277
LANCL3	0.103131	0.994062	-0.612988
ADAMTS3	0.103197	0.994062	0.84986
RP3-467L1.6	0.103223	0.994062	0.374576
CATSPERB	0.103288	0.994062	-0.473104
ZNF382	0.103358	0.994062	-0.261624
TMEM263	0.103383	0.994062	0.270844
SGOL1	0.103403	0.994062	0.28702
HMG20A	0.103468	0.994062	-0.165073
HIST1H3I	0.103529	0.994062	0.423965
METTL23	0.103611	0.994062	0.290445
CEP112	0.103657	0.994062	-0.364161
RAB11FIP2	0.103663	0.994062	0.233572
RPE	0.103762	0.994062	0.190557
PSMB4	0.103805	0.994062	0.289787
TRGC2	0.103997	0.994062	0.483989
AKAP12	0.104054	0.994062	-0.749189
HSP90B1	0.104091	0.994062	0.509382
ALDH1A1	0.104104	0.994062	-0.891608
LCMT1	0.104113	0.994062	0.278192
CLCC1	0.104124	0.994062	0.226693
PLK4	0.104302	0.994062	0.370318
LINC00211	0.104339	0.994062	0.47465
PPAP2B	0.104479	0.994062	0.653725
TRANK1	0.104496	0.994062	-0.552885
IGHV3-15	0.104557	0.994062	1.07087
WIPI1	0.104592	0.994062	0.328827
ILF3	0.104715	0.994062	-0.187642
UBE2C	0.104799	0.994062	0.499573
RP11-415F23.3	0.104873	0.994062	-0.497252
RN7SKP110	0.10497	0.994062	-0.583344
AC006978.6	0.105112	0.994062	-0.338287
LUC7L	0.105114	0.994062	-0.270663
SLC35A3	0.105165	0.994062	0.178689
RRM2	0.105184	0.994062	0.47338
PIGK	0.105531	0.994062	0.314559
WDR36	0.105563	0.994062	0.187409
CXCR2	0.105946	0.994062	-0.450128
TMEM206	0.106049	0.994062	-0.218256
TTLL5	0.106073	0.994062	-0.402007
HEG1	0.106369	0.994062	-0.410237
CTD-3252C9.4	0.106534	0.994062	0.365123
LZTFL1	0.106547	0.994062	0.256559
HIGD2A	0.106566	0.994062	0.395373
BBS4	0.106624	0.994062	-0.270181
DNAJB2	0.10672	0.994062	-0.532496
RPL37A	0.106814	0.994062	0.293888
ANKS3	0.106836	0.994062	-0.408274
AASDHPPT	0.107022	0.994062	0.187624
FAM96B	0.107174	0.994062	0.397394
ELAC2	0.10751	0.994062	-0.209404
TSEN34	0.107579	0.994062	-0.269491
PKIA	0.107604	0.994062	-0.315659
DOPEY2	0.107685	0.994062	0.341105
PPIA	0.107741	0.994062	0.289045
AUTS2	0.107758	0.994062	-0.379811
CTC1	0.107867	0.994062	-0.335592
EFHC2	0.107875	0.994062	-0.580951
RP11-701H24.4	0.107904	0.994062	0.536144
TRMT1	0.107934	0.994062	-0.292234
LINC00342	0.108008	0.994062	-0.402694
UAP1	0.108037	0.994062	0.436015
ANKRD10-IT1	0.108062	0.994062	0.254488
PTP4A3	0.108241	0.994062	0.647443
IGHG3	0.108243	0.994062	0.844767
FUS	0.108247	0.994062	-0.393826
ZC3H18	0.10832	0.994062	-0.299299
AK2	0.108327	0.994062	0.22573
CHMP1A	0.108368	0.994062	0.25584
MRPL27	0.108386	0.994062	0.300591
RP11-28F1.2	0.108765	0.994062	0.49538
ZNF280D	0.108782	0.994062	0.229904
C6orf211	0.108794	0.994062	0.266371
ATP2A2	0.108795	0.994062	-0.281803
CTD-2026D20.3	0.108984	0.994062	-0.405317
RGPD8	0.109042	0.994062	-0.610352
SKA1	0.109063	0.994062	0.499613
ATG5	0.109271	0.994062	0.230734
HIST2H2AA4	0.10939	0.994062	0.56324
TRMT10B	0.109405	0.994062	-0.280711
ZNF26	0.109425	0.994062	-0.217119
SLC25A46	0.109653	0.994062	0.229277
SMPDL3A	0.109823	0.994062	0.572415
RP11-1280N14.3	0.109869	0.994062	0.714311
PSMA1	0.109871	0.994062	0.206583
GMPPA	0.109957	0.994062	-0.397496
TBC1D31	0.10998	0.994062	-0.300305
MRPL17	0.110027	0.994062	0.324291
HERC2P9	0.110038	0.994062	-0.492945
SNX22	0.110149	0.994062	-0.369192
SLC22A5	0.110182	0.994062	-0.43936
RARA-AS1	0.110318	0.994062	0.34608
HERPUD1	0.110525	0.994062	0.258324
SDPR	0.110568	0.994062	-0.653512
XX-FW83563B9.5	0.110684	0.994062	0.444701
KRR1	0.110728	0.994062	0.202006
HAX1	0.110829	0.994062	0.308604
RPL36	0.111106	0.994062	0.339705
LRRC42	0.111129	0.994062	0.28416
CHPF	0.111552	0.994062	0.670411
POLQ	0.111651	0.994062	0.345449
LMBRD2	0.11185	0.994062	0.22329
UTP11L	0.111912	0.994062	0.235005
CHCHD2	0.112006	0.994062	0.334957
TMPRSS9	0.112029	0.994062	-1.07727
CCRL2	0.112131	0.994062	0.595528
STAG3L5P	0.112312	0.994062	-0.3405
ALOX5AP	0.112527	0.994062	0.397679
PAX8-AS1	0.112752	0.994062	-0.902568
AKR1A1	0.112843	0.994062	0.241381
USP13	0.112895	0.994062	-0.257864
IGHV3-23	0.112958	0.994062	0.818206
DUSP1	0.113015	0.994062	0.298098
CEP164	0.113072	0.994062	-0.277556
TRPM6	0.113088	0.994062	0.308073
SCAMP1	0.113326	0.994062	0.190583
ST8SIA1	0.113485	0.994062	-0.531524
METTL9	0.113588	0.994062	0.350345
CDKN2AIP	0.113646	0.994062	0.178031
COPS8	0.113764	0.994062	0.202717
CLN6	0.113783	0.994062	0.311422
PPP1R12A	0.113816	0.994062	0.16232
PRAM1	0.113842	0.994062	0.504607
NUP93	0.113871	0.994062	-0.195553
RP11-299A16.1	0.113993	0.994062	0.486612
ZNF775	0.114132	0.994062	-0.29589
CARM1	0.114213	0.994062	-0.503833
CTBP1	0.114243	0.994062	-0.177905
TRIM13	0.114325	0.994062	0.192411
TWISTNB	0.114369	0.994062	0.246153
FBL	0.114432	0.994062	0.301643
UBE3A	0.114507	0.994062	0.147693
RP11-181E10.3	0.114584	0.994062	0.465176
C7orf26	0.114618	0.994062	0.243582
ZNF273	0.114648	0.994062	0.249711
ME1	0.114724	0.994062	-0.5521
WEE1	0.114757	0.994062	0.266704
TMEM5	0.11476	0.994062	0.236591
AC093616.4	0.114826	0.994062	0.476021
LINC00649	0.114898	0.994062	-0.386958
CTC-459F4.1	0.115012	0.994062	0.420521
HIST1H2BB	0.11506	0.994062	0.495845
IKBIP	0.1151	0.994062	0.376026
DAB2	0.115114	0.994062	-0.370664
RP11-53B2.2	0.115143	0.994062	-0.467343
RPL15	0.115206	0.994062	0.311883
SGK1	0.115234	0.994062	0.495102
WARS2	0.115236	0.994062	0.24574
ZNF561	0.115429	0.994062	-0.173396
PURB	0.115517	0.994062	0.148808
RP11-499P20.2	0.115683	0.994062	-0.362173
EIF5	0.116277	0.994062	0.184653
LRG1	0.116286	0.994062	0.367088
PWAR6	0.116367	0.994062	-0.431878
CXorf57	0.116402	0.994062	-0.40398
DSC2	0.116528	0.994062	0.787883
THAP2	0.11653	0.994062	0.282377
RPL24	0.116596	0.994062	0.350385
ICA1L	0.11661	0.994062	-0.369065
CD164	0.116719	0.994062	0.201563
CCDC57	0.116856	0.994062	-0.348374
SMIM12	0.116955	0.994062	0.180084
TUBA4A	0.117015	0.994062	0.34129
RP11-747H7.3	0.117184	0.994062	-0.555258
COQ5	0.117241	0.994062	0.320103
IFT172	0.117336	0.994062	-0.263381
CCDC28B	0.11751	0.994062	-0.452827
FAM160B2	0.117555	0.994062	-0.394859
TM9SF2	0.117589	0.994062	0.243817
SURF4	0.117601	0.994062	0.286896
XBP1	0.117642	0.994062	0.480816
HIST1H2AG	0.117696	0.994062	0.393908
GYG1	0.117838	0.994062	0.326455
LAPTM4B	0.117851	0.994062	0.628336
BBIP1	0.118073	0.994062	-0.202962
MLLT3	0.118089	0.994062	-0.212147
SCAMP2	0.118114	0.994062	0.380986
MTHFD2	0.118158	0.994062	0.319406
MZT2B	0.118327	0.994062	0.353918
EEF1A1	0.118466	0.994062	0.244084
MIR600HG	0.118528	0.994062	-0.324186
ACSS3	0.118719	0.994062	0.41177
SLC39A14	0.118888	0.994062	0.40948
FASTK	0.118896	0.994062	0.265354
VBP1	0.118951	0.994062	0.297064
CDKN1C	0.119041	0.994062	-0.802299
EGF	0.119049	0.994062	-0.585227
BRD3	0.11915	0.994062	-0.319332
RP11-730K11.1	0.119176	0.994062	-0.468431
HLA-DRA	0.119471	0.994062	0.494029
HIST1H3C	0.119503	0.994062	0.542722
AHCY	0.119524	0.994062	0.297936
BCAP29	0.119634	0.994062	0.215497
YEATS2	0.119641	0.994062	0.324769
CXorf40B	0.119817	0.994062	0.286783
ZNF626	0.119826	0.994062	0.340802
VDAC1	0.119964	0.994062	0.270015
REM2	0.119973	0.994062	-0.617271
PHF6	0.12002	0.994062	0.196348
SPATA5L1	0.12008	0.994062	0.240833
C1orf52	0.120286	0.994062	0.185791
EXOC5	0.120681	0.994062	0.156848
ABHD12	0.120724	0.994062	-0.32172
TRIM5	0.120732	0.994062	-0.304398
MRPL3	0.120834	0.994062	0.311258
IFIT1	0.120845	0.994062	-1.34502
LCN2	0.120952	0.994062	1.06379
PMAIP1	0.120956	0.994062	0.383653
HIATL1	0.120969	0.994062	0.253096
CDCA5	0.121147	0.994062	0.452207
SSR4	0.121187	0.994062	0.420329
PAPD5	0.121259	0.994062	0.169868
SEC11A	0.121292	0.994062	0.220237
RWDD4	0.121371	0.994062	0.219323
KIF5C	0.121454	0.994062	-0.331003
PTTG1	0.121494	0.994062	0.431511
TMEM55A	0.121666	0.994062	0.31022
RAB4B	0.121792	0.994062	0.432919
C9orf139	0.121969	0.994062	0.418961
TNRC6C	0.122136	0.994062	-0.346374
SOAT1	0.122167	0.994062	-0.193342
ORC1	0.122183	0.994062	0.409276
EBAG9	0.122195	0.994062	0.262347
GHITM	0.122335	0.994062	0.268897
RP11-299J3.8	0.122337	0.994062	0.221022
TNF	0.122526	0.994062	0.628481
TAF9	0.122579	0.994062	0.255532
LINC00680	0.12258	0.994062	-0.28565
SNHG6	0.122631	0.994062	0.379285
AFG3L1P	0.122668	0.994062	-0.202211
PBX2	0.122734	0.994062	-0.249195
SLC14A1	0.122867	0.994062	-1.01197
TAF1	0.122873	0.994062	-0.213469
PANK3	0.123456	0.994062	0.200697
SFXN4	0.12349	0.994062	0.340965
U91328.19	0.123529	0.994062	-0.529619
IFNGR1	0.123542	0.994062	0.279216
NINJ1	0.123557	0.994062	0.399613
ZFP30	0.123723	0.994062	-0.299449
PLA2G12A	0.124043	0.994062	-0.283245
ZNF654	0.124332	0.994062	0.230885
SNRPG	0.124381	0.994062	0.468575
AC079630.2	0.124403	0.994062	-0.760423
DCAF15	0.124779	0.994062	-0.42378
BTG2	0.12487	0.994062	0.398489
DNAH11	0.124881	0.994062	-0.687659
ANXA3	0.124921	0.994062	0.463382
STOM	0.12493	0.994062	0.332101
MADD	0.124979	0.994062	-0.271831
MDH1	0.125076	0.994062	0.183699
PRADC1	0.125281	0.994062	0.418393
ZNF445	0.125321	0.994062	-0.291925
SIGLEC5	0.125325	0.994062	0.384437
PRKAG2	0.125431	0.994062	-0.289309
RPL30	0.125434	0.994062	0.361025
C10orf32	0.125441	0.994062	0.3307
SP140L	0.125444	0.994062	-0.293615
SCYL2	0.125473	0.994062	0.158942
LRRC37A	0.125504	0.994062	-0.854109
MIF	0.125597	0.994062	0.475759
IL21-AS1	0.12563	0.994062	0.613208
SLC22A16	0.125688	0.994062	0.5801
USP1	0.125693	0.994062	0.29582
SLC1A5	0.125788	0.994062	0.541178
FHIT	0.126008	0.994062	-0.402857
PZP	0.126121	0.994062	-0.843441
KAT6A	0.126135	0.994062	-0.209704
CCDC77	0.126461	0.994062	-0.303597
SLC25A14	0.126618	0.994062	0.231795
TSPYL1	0.12663	0.994062	-0.203165
SERINC5	0.12666	0.994062	-0.323546
FAM120C	0.12689	0.994062	-0.274494
IGHV3-33	0.127017	0.994062	0.809301
C19orf48	0.127062	0.994062	0.359806
BMI1	0.127089	0.994062	0.230475
FGD6	0.127134	0.994062	-0.326465
HSPA4L	0.127577	0.994062	0.77979
GALNT14	0.127639	0.994062	0.592648
HIVEP3	0.127726	0.994062	-0.42505
HIST2H2AB	0.127734	0.994062	0.369329
MYCBP	0.127739	0.994062	0.268605
ELP4	0.12793	0.994062	0.195033
FAM101B	0.128006	0.994062	0.588396
CD58	0.128134	0.994062	0.212601
PDK2	0.12816	0.994062	-0.674639
HIBADH	0.128163	0.994062	0.239324
AIG1	0.128258	0.994062	0.272557
MMADHC	0.128381	0.994062	0.240391
CCDC92	0.12849	0.994062	-0.345926
ZNF792	0.128555	0.994062	-0.252177
TSG101	0.128557	0.994062	0.172806
ERC1	0.1286	0.994062	-0.211086
TCEANC	0.128622	0.994062	-0.295162
JAKMIP2	0.128663	0.994062	-0.545269
PPP2R5B	0.128683	0.994062	-0.457874
NUGGC	0.128683	0.994062	0.484712
CHD4	0.128753	0.994062	-0.25061
ZRSR2	0.128764	0.994062	-0.3256
PPAT	0.128872	0.994062	0.248777
TWF1	0.129051	0.994062	0.28182
MLLT4	0.129063	0.994062	0.371921
RBMS2	0.12907	0.994062	-0.542379
RP5-1085F17.3	0.129121	0.994062	0.312687
BET1L	0.129243	0.994062	-0.424805
CCNB2	0.129253	0.994062	0.405157
GBA	0.129307	0.994062	0.373358
NCOR2	0.129405	0.994062	-0.324605
ANKIB1	0.129573	0.994062	0.139026
TESPA1	0.129646	0.994062	-0.305024
SLC25A5	0.129681	0.994062	0.278098
ABCD3	0.129701	0.994062	0.159054
DERL2	0.129705	0.994062	0.1775
PIGW	0.129857	0.994062	0.268634
VIMP	0.129936	0.994062	0.34549
YIPF2	0.130008	0.994062	0.339604
SDHD	0.130112	0.994062	0.237634
ANXA6	0.130213	0.994062	-0.309795
IL32	0.130346	0.994062	0.440218
UBE2N	0.130372	0.994062	0.160481
KIAA1407	0.130428	0.994062	-0.26396
HFE	0.130431	0.994062	-0.422195
RANBP6	0.130477	0.994062	0.228831
ATP2B4	0.130529	0.994062	-0.335255
PRDM4	0.13056	0.994062	-0.161254
XPC	0.130561	0.994062	-0.220507
RPS15A	0.130597	0.994062	0.396601
NDUFA4	0.130646	0.994062	0.360364
HIST2H2AC	0.130663	0.994062	0.258703
PGM2	0.130763	0.994062	0.220007
PDZD11	0.130947	0.994062	0.26362
CCDC88C	0.130993	0.994062	-0.214297
HDAC6	0.131243	0.994062	-0.235456
YIF1A	0.131274	0.994062	0.339058
MAK16	0.131275	0.994062	0.271017
PPARG	0.131305	0.994062	0.583164
CD22	0.131378	0.994062	-0.295949
SIRT2	0.131437	0.994062	0.315583
PRKCI	0.131504	0.994062	0.19631
AP000347.2	0.131511	0.994062	-0.447058
RP11-44N11.1	0.131517	0.994062	-0.513647
SDHAP3	0.131534	0.994062	-0.275082
RP11-88E10.5	0.131597	0.994062	0.295463
RP11-73O6.3	0.131651	0.994062	-0.535977
AC010761.8	0.131667	0.994062	0.560402
TMEM254	0.131709	0.994062	0.290745
EP400NL	0.131754	0.994062	-0.294937
ALG9	0.131796	0.994062	-0.322842
GCSAM	0.131935	0.994062	0.382346
SERP1	0.131978	0.994062	0.265181
COX5A	0.132068	0.994062	0.307582
HINT1	0.132166	0.994062	0.424165
ATP5S	0.132237	0.994062	-0.325186
RP13-270P17.3	0.132325	0.994062	-0.518972
PCNA	0.132513	0.994062	0.326644
RP11-872J21.5	0.132675	0.994062	0.3491
AKAP7	0.132828	0.994062	-0.439327
MMS22L	0.132839	0.994062	0.205065
BCL11B	0.132869	0.994062	-0.254445
SH3TC2	0.133363	0.994062	-0.530525
AIM2	0.133439	0.994062	-0.459657
EIF3H	0.133634	0.994062	0.172516
USP30	0.133636	0.994062	-0.267706
TMEM184C	0.133709	0.994062	0.195408
LINC01184	0.133801	0.994062	-0.217972
STYX	0.13395	0.994062	0.154876
SPECC1	0.133978	0.994062	-0.693674
EIF3E	0.134006	0.994062	0.228823
RDH14	0.134073	0.994062	0.340005
ECH1	0.13414	0.994062	0.278229
BCAP31	0.134266	0.994062	0.237865
SIGMAR1	0.134287	0.994062	-0.270048
MAX	0.134322	0.994062	-0.177922
ACOX3	0.134328	0.994062	0.206557
LINC00630	0.134374	0.994062	-0.30634
CTC-479C5.12	0.134454	0.994062	-0.342438
DNMBP	0.134534	0.994062	-0.350505
TIGD7	0.134572	0.994062	0.304223
SEMA7A	0.134632	0.994062	0.31959
DRAXIN	0.134719	0.994062	0.384352
IGKV1-27	0.13473	0.994062	0.831267
BMP8B	0.134736	0.994062	0.479413
CD226	0.134967	0.994062	-0.27048
RP11-884K10.7	0.135047	0.994062	-0.276806
PAPD7	0.135047	0.994062	-0.246924
S100A9	0.135088	0.994062	0.407573
DESI2	0.13513	0.994062	0.157886
PI3	0.135268	0.994062	1.45445
FAM200B	0.135336	0.994062	0.206693
WWOX	0.135346	0.994062	-0.270981
PGK1	0.135387	0.994062	0.253959
DUSP6	0.135423	0.994062	0.246297
PRDX3	0.135442	0.994062	0.24413
TAF1A	0.135484	0.994062	-0.240005
TTC39C	0.135517	0.994062	-0.323396
STAC3	0.135558	0.994062	-0.372633
RNASEH2C	0.135691	0.994062	0.355481
TRAJ12	0.135737	0.994062	-0.33062
VAMP1	0.135786	0.994062	0.298941
CKS1B	0.135867	0.994062	0.401157
EDEM2	0.135888	0.994062	0.232063
GZMA	0.136008	0.994062	0.306633
AGPAT9	0.136083	0.994062	0.374386
RABGGTB	0.13617	0.994062	0.174689
IGLV1-47	0.136178	0.994062	0.912423
PAICS	0.136298	0.994062	0.273906
P4HB	0.136333	0.994062	0.309151
SLC4A2	0.136475	0.994062	-0.305255
PIGN	0.136629	0.994062	0.159785
AZIN1	0.136754	0.994062	0.250474
RP6-159A1.4	0.136926	0.994062	0.404253
PGLS	0.13694	0.994062	0.260486
EMG1	0.137196	0.994062	-0.242093
CDK5RAP1	0.137204	0.994062	-0.171088
HDDC2	0.13722	0.994062	-0.219168
HSDL1	0.137253	0.994062	0.21826
FAM98C	0.137273	0.994062	0.314831
FAM206A	0.137339	0.994062	0.221532
VSIG10	0.137438	0.994062	0.588949
LTN1	0.137516	0.994062	0.163238
SHCBP1	0.137602	0.994062	0.475203
PFKL	0.137678	0.994062	-0.218112
UBXN10	0.138083	0.994062	-0.5558
IGHV3-64	0.138257	0.994062	0.832322
C16orf54	0.138293	0.994062	0.298677
CAMKMT	0.138298	0.994062	-0.313839
DLAT	0.13833	0.994062	0.179946
MFSD10	0.138489	0.994062	0.339716
RCAN3	0.138503	0.994062	-0.319827
CRISP3	0.138532	0.994062	0.880891
SNX20	0.138683	0.994062	-0.27388
LEMD3	0.138776	0.994062	0.168143
ABI2	0.138804	0.994062	-0.285363
SEL1L3	0.138878	0.994062	0.245034
ALDH8A1	0.138903	0.994062	-0.426399
RPLP2	0.138975	0.994062	0.305667
RYR3	0.139084	0.994062	-0.823331
PTPMT1	0.139102	0.994062	0.308264
ASTE1	0.139122	0.994062	0.192193
GINS4	0.139332	0.994062	0.41638
ZNF611	0.139381	0.994062	-0.210789
MYO1G	0.13939	0.994062	-0.208166
KIAA0355	0.139503	0.994062	-0.299038
SEC61A1	0.139707	0.994062	0.273549
A2M-AS1	0.139739	0.994062	-0.587873
ABCG1	0.13985	0.994062	-0.569185
ZNF608	0.139854	0.994062	0.461322
BIRC5	0.14002	0.994062	0.462601
IGLV7-43	0.140113	0.994062	1.01126
FPGT	0.140162	0.994062	0.291896
CAP1	0.140208	0.994062	0.177772
SLC25A44	0.140334	0.994062	-0.238893
COMMD3	0.140378	0.994062	0.376537
DHX38	0.140576	0.994062	-0.219547
LIG3	0.140714	0.994062	-0.177921
GBE1	0.140797	0.994062	0.259248
MRPL22	0.14102	0.994062	0.285673
UFL1	0.141032	0.994062	0.220448
WDR4	0.141068	0.994062	-0.348834
TMED7	0.141536	0.994062	0.227019
MYCL	0.141547	0.994062	-0.6102
HIST1H2AJ	0.14168	0.994062	0.473309
ABCB8	0.141788	0.994062	-0.296016
NUP50-AS1	0.141826	0.994062	-0.350578
MRPS2	0.141845	0.994062	0.36889
MRPS35	0.141891	0.994062	0.214731
XRRA1	0.141917	0.994062	-0.372153
MRS2	0.141994	0.994062	-0.189178
AC012363.4	0.142303	0.994062	-0.798753
IKZF2	0.142675	0.994062	0.387799
YLPM1	0.142716	0.994062	-0.272244
PLEKHO2	0.142836	0.994062	0.248271
NEU1	0.142865	0.994062	0.274035
SH2D1B	0.142998	0.994062	-0.505004
YRDC	0.143004	0.994062	0.286331
RASGRF2	0.143021	0.994062	-0.27606
SLC25A40	0.143079	0.994062	0.37825
AATF	0.143102	0.994062	-0.212394
ANKRD36	0.143317	0.994062	-0.238903
TBC1D5	0.14347	0.994062	-0.196608
USP11	0.143487	0.994062	0.268156
RP11-164H13.1	0.143538	0.994062	-0.463829
AK5	0.143654	0.994062	-0.468629
TBC1D10A	0.143815	0.994062	-0.490882
HDGFRP3	0.144346	0.994062	0.316607
GPATCH2	0.144442	0.994062	0.189621
GMFB	0.14454	0.994062	0.220704
MGST1	0.144817	0.994062	0.373439
NOL4L	0.144935	0.994062	-0.345551
MCM5	0.145087	0.994062	0.217573
TBCA	0.145136	0.994062	0.391166
ABCC3	0.14514	0.994062	-0.571877
WBSCR22	0.145294	0.994062	0.339122
RPN2	0.145347	0.994062	0.302748
CXXC5	0.145691	0.994062	0.254717
WDR86-AS1	0.145794	0.994062	-0.605337
RPS19BP1	0.1458	0.994062	0.281768
DIP2C	0.145951	0.994062	-0.385377
TFAM	0.146097	0.994062	0.227068
TOMM70A	0.146108	0.994062	0.2099
ALMS1	0.146158	0.994062	-0.19073
MAP4K4	0.146177	0.994062	-0.278322
DNM3	0.146392	0.994062	-0.431328
ATP10A	0.146397	0.994062	-0.285571
RP11-159G9.5	0.146425	0.994062	0.191156
POLI	0.146426	0.994062	0.206843
FHL1	0.146519	0.994062	-0.430782
CRHR1-IT1	0.146545	0.994062	-0.300605
GINS2	0.146586	0.994062	0.426884
RPL13A	0.146602	0.994062	0.233448
RP11-876N24.5	0.146738	0.994062	-0.296134
MBIP	0.146767	0.994062	0.247552
ITGA7	0.146808	0.994062	0.448785
ERO1L	0.146876	0.994062	0.209207
SSR3	0.14711	0.994062	0.300627
IMMP2L	0.147145	0.994062	-0.33729
PDHX	0.147245	0.994062	0.157237
ZNF548	0.147275	0.994062	-0.236317
OIP5-AS1	0.147348	0.994062	0.148209
PIGA	0.147356	0.994062	0.203343
TRMT44	0.147841	0.994062	-0.228438
BID	0.147969	0.994062	0.243213
MTBP	0.147995	0.994062	0.187694
MICAL3	0.14814	0.994062	-0.332539
RP11-673C5.1	0.148414	0.994062	0.578523
IFNG	0.148416	0.994062	0.49019
LRSAM1	0.148496	0.994062	-0.230258
FAM3C	0.148517	0.994062	0.199648
ZBTB2	0.148582	0.994062	0.166897
ATP2C2	0.148614	0.994062	0.904078
RGS19	0.148632	0.994062	0.184354
CDK2	0.148688	0.994062	0.249422
ST3GAL3	0.148732	0.994062	-0.400636
KANSL2	0.148872	0.994062	0.166527
ZNF559	0.148899	0.994062	-0.231297
MSMO1	0.148948	0.994062	0.298082
DACT1	0.149063	0.994062	0.541433
WDR27	0.149227	0.994062	-0.315533
TICRR	0.149258	0.994062	0.402609
HCLS1	0.149294	0.994062	-0.235991
MROH1	0.149493	0.994062	-0.370241
MICU2	0.149511	0.994062	0.237114
DRAM1	0.149513	0.994062	0.330353
IGHG2	0.149631	0.994062	0.840919
RP11-396K3.1	0.149645	0.994062	-0.426585
PI4KA	0.149821	0.994062	-0.29827
Mar-01	0.149859	0.994062	0.4913
LRIF1	0.14996	0.994062	0.271687
CDHR3	0.15008	0.994062	-0.416684
ANKHD1	0.150129	0.994062	-0.312531
ATP6AP1	0.150416	0.994062	0.254839
FAM89A	0.150496	0.994062	0.420158
ATF7IP2	0.150769	0.994062	-0.212235
DISC1-IT1	0.150875	0.994062	-0.618281
ACO2	0.150883	0.994062	0.226218
RP11-436I9.6	0.151037	0.994062	-0.580554
C1orf198	0.151039	0.994062	-0.483724
RALGAPA1P	0.151072	0.994062	0.369681
VAV1	0.151278	0.994062	-0.219463
GNB2L1	0.151339	0.994062	0.20202
TXK	0.151464	0.994062	-0.309745
DROSHA	0.151669	0.994062	-0.231353
SDC4	0.151685	0.994062	0.579527
CFAP54	0.151725	0.994062	0.442448
B3GALNT1	0.151753	0.994062	0.488075
DTHD1	0.151791	0.994062	0.377292
ZNF473	0.152076	0.994062	0.239404
OPLAH	0.152232	0.994062	0.509625
THUMPD3-AS1	0.15233	0.994062	0.174072
RBM12B	0.152349	0.994062	0.206435
JKAMP	0.152416	0.994062	0.212075
WDR20	0.152437	0.994062	-0.132467
OPTN	0.152447	0.994062	-0.447403
KHNYN	0.152461	0.994062	-0.156843
HIST1H1E	0.152516	0.994062	0.368176
POLR3D	0.152564	0.994062	0.195475
HMGCL	0.152578	0.994062	0.237125
YES1P1	0.152595	0.994062	-0.465265
IGKV2D-29	0.15267	0.994062	1.22457
SHMT2	0.152733	0.994062	0.292349
ATP8A1	0.152743	0.994062	0.230527
CTD-2227E11.1	0.152819	0.994062	0.638975
ZNF845	0.152863	0.994062	0.314516
LINC00339	0.152864	0.994062	0.298145
FAM102A	0.152975	0.994062	-0.337574
FAM72A	0.152987	0.994062	0.357741
PKI55	0.153106	0.994062	0.236361
OTUD1	0.153149	0.994062	0.309671
RNF103	0.15327	0.994062	0.178542
STK16	0.153428	0.994062	0.220401
TSEN15	0.153492	0.994062	0.226615
IFNAR2	0.153529	0.994062	-0.230895
ABCE1	0.153724	0.994062	0.242858
LINC01588	0.153729	0.994062	-0.344954
NUDT16L1	0.153781	0.994062	0.397262
RPGRIP1	0.153789	0.994062	-0.621423
LINC00888	0.153818	0.994062	0.37432
TCF20	0.153852	0.994062	-0.18806
PRR11	0.153852	0.994062	0.384817
CEP19	0.153866	0.994062	-0.38019
SNORA31	0.153947	0.994062	-0.373635
RP11-326I11.3	0.153986	0.994062	0.233466
IGHV3-30	0.153996	0.994062	1.05958
ZNF487	0.154036	0.994062	-0.256638
KIF18A	0.154218	0.994062	0.262922
RBM14	0.154243	0.994062	-0.340075
GDF11	0.154285	0.994062	-0.343604
ZCCHC2	0.15431	0.994062	-0.375131
RP11-84G21.1	0.154331	0.994062	0.2755
KLRK1	0.15435	0.994062	-0.515214
INVS	0.154376	0.994062	-0.206452
PSMC3IP	0.154377	0.994062	0.32928
MRVI1-AS1	0.15441	0.994062	0.507116
NF2	0.154511	0.994062	-0.215655
VPS39	0.154587	0.994062	-0.231955
CCM2	0.154605	0.994062	-0.203755
PHB2	0.154799	0.994062	0.269285
FAM83D	0.154987	0.994062	0.349164
NAAA	0.155017	0.994062	-0.268135
CENPE	0.155199	0.994062	0.37464
CHRM3-AS2	0.155424	0.994062	-0.371925
MMD	0.155533	0.994062	-0.467771
DNHD1	0.155589	0.994062	-0.375495
TMCO1	0.155734	0.994062	0.310247
DHX57	0.155771	0.994062	-0.187385
AEN	0.155779	0.994062	0.250476
ZNF227	0.155791	0.994062	-0.183178
ITPR3	0.155899	0.994062	-0.254218
KIAA1107	0.155949	0.994062	0.296377
PGBD4	0.155966	0.994062	0.293853
HIST1H4D	0.156053	0.994062	0.370535
KIF22	0.156142	0.994062	0.289537
CLCN4	0.156262	0.994062	-0.487222
IMPA1	0.156413	0.994062	0.188493
ZBED5	0.156492	0.994062	0.190446
BLOC1S4	0.156756	0.994062	0.336864
OSBPL1A	0.15688	0.994062	0.365596
THAP1	0.156885	0.994062	0.198654
ULK2	0.156992	0.994062	-0.287204
MRAS	0.157208	0.994062	-0.448221
NECAB1	0.157377	0.994062	0.789195
HECW2	0.157449	0.994062	-0.445239
UNC13B	0.157539	0.994062	0.475139
EGLN3	0.157556	0.994062	-0.359832
KRAS	0.157712	0.994062	0.209386
RP11-58E21.3	0.157776	0.994062	-0.406613
RNMT	0.157833	0.994062	0.190095
M6PR	0.157867	0.994062	0.224461
SIK2	0.157869	0.994062	-0.271703
ETNK1	0.158127	0.994062	0.184114
RN7SL834P	0.158133	0.994062	-0.367617
UBAP2L	0.158135	0.994062	-0.249819
MCM7	0.158407	0.994062	0.250163
CKS2	0.158411	0.994062	0.465403
EEF2KMT	0.158444	0.994062	0.349286
FGFRL1	0.158484	0.994062	-0.433323
RHOA	0.15857	0.994062	0.185673
RNF139	0.158706	0.994062	0.247453
TRMT12	0.158916	0.994062	0.216653
LRRC45	0.158961	0.994062	-0.254515
THYN1	0.159022	0.994062	0.199725
LAMA2	0.159149	0.994062	-0.746465
NUB1	0.159218	0.994062	-0.299272
IPP	0.159247	0.994062	0.18996
NAA20	0.159338	0.994062	0.226964
RPS27A	0.159357	0.994062	0.385132
ZNF485	0.159397	0.994062	-0.302995
MAP3K7CL	0.159452	0.994062	-0.44771
CYSTM1	0.159491	0.994062	0.410865
TIMM13	0.159721	0.994062	0.335592
TXNL1	0.159837	0.994062	0.18217
SLC9A9	0.159912	0.994062	-0.221393
PLA2G4C	0.159946	0.994062	-0.380869
PDGFA	0.160114	0.994062	-0.524325
STK24	0.160252	0.994062	-0.197353
PSMG3	0.160281	0.994062	0.374943
MYBL1	0.16033	0.994062	-0.392915
RP11-620J15.3	0.160529	0.994062	0.399505
ACRBP	0.160653	0.994062	-0.408531
SSB	0.160669	0.994062	0.45975
ZNF24	0.160759	0.994062	0.166772
SLC24A1	0.160764	0.994062	-0.358364
NUTM2B-AS1	0.160769	0.994062	-0.508994
METTL16	0.160872	0.994062	-0.265996
ZDHHC3	0.160921	0.994062	0.216758
ADAM20	0.161025	0.994062	-0.43524
TOMM5	0.161151	0.994062	-0.260926
RP11-326C3.11	0.161382	0.994062	0.435701
RP11-230F18.5	0.161397	0.994062	0.345426
TTLL12	0.161398	0.994062	0.291434
PSMD8	0.161472	0.994062	0.246957
CSRP2BP	0.161611	0.994062	-0.215478
TMEM205	0.16169	0.994062	0.345053
DYNLL1	0.16169	0.994062	0.360922
EGR3	0.161729	0.994062	0.723404
FH	0.161836	0.994062	0.232288
BTRC	0.161846	0.994062	-0.244835
SMPD2	0.161861	0.994062	0.285354
AC020951.1	0.162001	0.994062	-0.296877
SUN2	0.162028	0.994062	-0.22469
HMGXB3	0.162129	0.994062	-0.178307
SIGLEC9	0.162279	0.994062	0.308948
LINC00926	0.162318	0.994062	-0.485142
HPRT1	0.162396	0.994062	0.245713
RP11-156E6.1	0.162803	0.994062	0.167622
KIAA1143	0.162846	0.994062	0.181848
TPX2	0.162904	0.994062	0.353207
NEU3	0.162992	0.994062	-0.250597
APBB3	0.163019	0.994062	0.418616
UBAP2	0.163023	0.994062	-0.298924
MYOM2	0.163064	0.994062	-0.661484
VPS33B	0.163111	0.994062	-0.239268
UBXN4	0.163128	0.994062	0.137239
CCAR1	0.163137	0.994062	0.129106
GNL1	0.163219	0.994062	-0.238844
ESCO2	0.163301	0.994062	0.36196
ADAM23	0.163312	0.994062	-0.536168
CORO2A	0.163374	0.994062	0.429655
AKAP13	0.163561	0.994062	-0.322626
OXR1	0.163868	0.994062	0.196336
PPP2R2B	0.164109	0.994062	-0.440698
BMP2K	0.164174	0.994062	-0.249305
ZNF737	0.164468	0.994062	0.226994
RPL14	0.164564	0.994062	0.220069
IGHV2-70	0.164593	0.994062	0.75355
PHLDA1	0.16475	0.994062	0.435554
POT1	0.164778	0.994062	0.210396
GABRR2	0.164779	0.994062	-0.403117
HUS1	0.164892	0.994062	-0.180159
PDE3A	0.165024	0.994062	-0.562623
C18orf21	0.165029	0.994062	0.2428
CD200	0.165067	0.994062	-0.356927
CLEC6A	0.165067	0.994062	0.537566
DNAJC10	0.165313	0.994062	0.172672
RP13-104F24.2	0.165342	0.994062	-0.390408
PCNP	0.165564	0.994062	0.150777
ANKRD44	0.165607	0.994062	-0.219842
SETD6	0.165763	0.994062	-0.220876
ZDHHC17	0.165767	0.994062	0.175713
CD36	0.165914	0.994062	-0.287168
ZFHX3	0.165964	0.994062	-0.38314
OCIAD1	0.16597	0.994062	0.152758
HEMGN	0.166097	0.994062	-0.971992
NAT1	0.166155	0.994062	0.218104
MAN1B1	0.16623	0.994062	-0.238346
CSPP1	0.166264	0.994062	-0.16897
RP11-104N10.2	0.166298	0.994062	-0.4386
PEX13	0.166344	0.994062	0.128358
ZNF444	0.166456	0.994062	-0.312923
EML3	0.16646	0.994062	-0.267551
LUZP1	0.16651	0.994062	-0.206728
CFAP44	0.166511	0.994062	-0.223348
KCNJ15	0.166541	0.994062	-0.386334
ATP6V1F	0.166551	0.994062	0.357459
C11orf1	0.166565	0.994062	0.296208
EDEM3	0.16668	0.994062	0.177685
PHF7	0.166924	0.994062	-0.308622
PSMA2	0.166928	0.994062	0.327485
CTC-559E9.6	0.166959	0.994062	-0.312768
TUBA1B	0.166989	0.994062	0.271352
ELOVL7	0.167199	0.994062	-0.48276
TFB2M	0.16741	0.994062	0.230323
SCPEP1	0.167473	0.994062	0.261373
MRPL55	0.167483	0.994062	0.266964
PTPN23	0.167521	0.994062	0.297927
NPTN	0.167574	0.994062	0.196742
ALDH3A2	0.167661	0.994062	0.20989
NGFRAP1	0.167802	0.994062	-0.446561
NDUFV3	0.167807	0.994062	0.156149
TRAF3IP2-AS1	0.16781	0.994062	-0.311641
UIMC1	0.167835	0.994062	-0.191664
BTBD11	0.167869	0.994062	-0.361599
TRAPPC9	0.168007	0.994062	-0.270552
RPL7A	0.168073	0.994062	0.249747
TRIM44	0.168253	0.994062	-0.166887
DOCK10	0.16835	0.994062	-0.212745
UQCC1	0.168468	0.994062	-0.19685
NUDT21	0.1685	0.994062	0.161744
LINC00954	0.168625	0.994062	-0.469304
C5orf63	0.168682	0.994062	-0.281878
MAP4	0.16874	0.994062	-0.265395
PTPN13	0.168998	0.994062	-0.378464
ACVR2A	0.16913	0.994062	-0.301374
IGKC	0.169256	0.994062	0.787255
NRAS	0.169392	0.994062	0.198311
C17orf62	0.16942	0.994062	0.224922
RHOBTB1	0.169606	0.994062	-0.470574
RBM23	0.169621	0.994062	-0.223686
C5AR1	0.1697	0.994062	0.456967
TMEM261	0.169893	0.994062	0.221209
NIPSNAP3A	0.170075	0.994062	0.307498
KYNU	0.170102	0.994062	-0.26171
[truncated: 10,254 more rows]

## Sheet: CH-UM
Gene	Pvalue	Adjusted_Pvalue	logFC
MMP8	1.25e-10	1.53e-06	4.03425
UBE2A	1.36e-09	6.58e-06	0.742452
LRRN1	1.63e-09	6.58e-06	1.56093
CYSTM1	2.41e-09	6.58e-06	1.37252
HSPA4L	2.69e-09	6.58e-06	2.47617
HSPA1B	4.43e-09	6.9e-06	2.9096
OLFM4	5.11e-09	6.9e-06	4.00589
RP11-452H21.1	5.53e-09	6.9e-06	2.25465
DCUN1D4	5.56e-09	6.9e-06	0.5768
STRAP	5.63e-09	6.9e-06	0.616877
HSPH1	1.12e-08	1.25e-05	2.56622
HSPE1	1.6e-08	1.63e-05	2.05243
STOM	2.67e-08	2.35e-05	0.929388
LGALS1	2.69e-08	2.35e-05	1.33002
MIR155HG	2.99e-08	2.44e-05	1.32211
BEND4	4.76e-08	3.57e-05	1.34984
MCEMP1	4.96e-08	3.57e-05	1.57043
MYOM2	6.62e-08	4.5e-05	-1.90784
P4HA1	6.99e-08	4.51e-05	1.15902
ACAD10	8.92e-08	5.47e-05	-0.601553
OLAH	1.26e-07	7.36e-05	2.06405
EMP1	1.38e-07	7.67e-05	1.81399
TRANK1	1.69e-07	8.98e-05	-1.3538
TAF7	1.76e-07	8.98e-05	0.649809
KRAS	3.14e-07	0.000154114	0.593413
HLA-F	3.45e-07	0.000162531	-0.698196
IL1R2	3.99e-07	0.000176083	1.64338
CLEC5A	4.08e-07	0.000176083	1.33815
RHOB	4.17e-07	0.000176083	1.29353
CD63	4.64e-07	0.000189325	0.907287
DNAJB1	4.91e-07	0.000194105	1.94582
BAG3	5.39e-07	0.000206303	2.22397
VEGFA	5.94e-07	0.000220461	1.18153
RAB13	7.13e-07	0.000257025	1.22409
ICAM3	7.35e-07	0.000257332	-0.573256
ITGB3BP	7.7e-07	0.000258111	0.745007
S100A8	7.79e-07	0.000258111	1.47422
MSMO1	8.75e-07	0.000282205	0.813441
YWHAH	9.69e-07	0.000297023	0.834744
SPP1	9.7e-07	0.000297023	2.89469
CKS2	1.08e-06	0.000321457	1.30322
HDC	1.29e-06	0.000368883	-2.41621
snoU2_19	1.29e-06	0.000368883	1.53658
AZI2	1.39e-06	0.000387281	0.576198
DNAH1	1.52e-06	0.000406411	-0.655275
CPQ	1.53e-06	0.000406411	-0.737082
SNRNP27	1.59e-06	0.000414522	0.776616
FAM188A	1.65e-06	0.000416501	0.598291
ARL8B	1.71e-06	0.000416501	0.470125
FRY	1.72e-06	0.000416501	-1.01227
CARD9	1.73e-06	0.000416501	-0.86567
CCNYL1	2.03e-06	0.000475883	0.514634
TMED5	2.06e-06	0.000475883	0.488084
CDK5RAP3	2.19e-06	0.00049741	-0.499108
FSD1L	2.24e-06	0.000497919	0.777118
PDE4B	2.34e-06	0.000497919	-0.691255
BTN3A1	2.35e-06	0.000497919	-0.99848
USP45	2.37e-06	0.000497919	0.488037
HINT1	2.4e-06	0.000497919	1.03778
PAG1	2.46e-06	0.000503203	0.536424
FAM47E-STBD1	2.56e-06	0.000513915	0.977565
CHORDC1	2.76e-06	0.000545229	1.3103
DNAJB4	2.95e-06	0.000574719	1.08077
CSGALNACT2	3.11e-06	0.000596089	0.523138
DNAJA4	3.31e-06	0.000623307	1.46852
ZBTB1	3.66e-06	0.000679084	0.518245
ADAM9	3.88e-06	0.000703056	0.701136
PLIN2	3.9e-06	0.000703056	1.07279
ANKRD44	4e-06	0.000710828	-0.556864
PNLDC1	4.21e-06	0.000730277	2.23374
PARD6G-AS1	4.26e-06	0.000730277	1.37543
RPL39	4.29e-06	0.000730277	1.15191
RETN	4.97e-06	0.000834023	2.24951
STAC3	5.45e-06	0.000895606	-0.893001
UBA7	5.48e-06	0.000895606	-0.85419
METTL9	5.99e-06	0.000942767	0.76909
CCDC146	6.01e-06	0.000942767	-0.92967
FTH1	6.07e-06	0.000942767	0.740328
LCN2	6.08e-06	0.000942767	2.48482
CX3CR1	6.3e-06	0.000965213	-0.877309
PSMB8-AS1	6.55e-06	0.000987404	-0.478676
EFCAB7	6.61e-06	0.000987404	0.740303
LAPTM4B	7.1e-06	0.0010479	1.37906
PTGES3	7.78e-06	0.0011354	0.776841
GCLM	8.27e-06	0.00119227	0.665944
CACYBP	8.37e-06	0.00119253	1.20929
ITGA7	8.88e-06	0.0012382	1.1298
SYTL1	8.89e-06	0.0012382	-0.549676
C2orf69	9.03e-06	0.00124289	0.452116
SNRPG	9.34e-06	0.00126399	1.07379
CETN3	9.39e-06	0.00126399	0.956667
TNFRSF10C	9.61e-06	0.00128017	-0.658504
MRPS6	9.8e-06	0.00129054	1.17904
HSPD1	1.02e-05	0.00132319	1.33873
HLA-E	1.03e-05	0.00132319	-0.501158
CLEC7A	1.06e-05	0.00135395	-1.22395
PCOLCE2	1.07e-05	0.00135395	2.23829
LDHA	1.09e-05	0.00135599	0.816579
BCL2A1	1.11e-05	0.00135599	1.14116
CTSL	1.11e-05	0.00135599	1.38301
UBE2D2	1.13e-05	0.00135599	0.435182
TGFBR3	1.13e-05	0.00135599	-0.764732
NUP93	1.17e-05	0.0013934	-0.422033
SLC5A3	1.19e-05	0.00140245	1.19406
AKAP5	1.21e-05	0.00140675	1.28376
NEDD4	1.28e-05	0.00147739	0.708884
HPRT1	1.3e-05	0.00147942	0.593856
SERPINH1	1.3e-05	0.00147942	2.21212
CTD-2006K23.1	1.36e-05	0.00152687	-1.74228
C14orf159	1.42e-05	0.00158291	-0.940052
MAFG	1.47e-05	0.00162167	0.907889
MARCO	1.49e-05	0.00162167	1.35237
SLPI	1.5e-05	0.00162167	1.87551
LINC01480	1.51e-05	0.00162167	1.18304
AMICA1	1.54e-05	0.00163363	-0.732596
SLC30A1	1.55e-05	0.00163363	0.77045
CCRL2	1.64e-05	0.00170831	1.2525
ARHGEF1	1.65e-05	0.00170831	-0.500609
BPI	1.71e-05	0.00176373	1.54988
OLR1	1.89e-05	0.00193166	2.04941
TXNL1	1.99e-05	0.00200496	0.427885
ZDHHC20	2.01e-05	0.00200496	0.608653
NNT-AS1	2.03e-05	0.00200496	0.459376
AMY2B	2.04e-05	0.00200496	-0.662606
TMEM68	2.05e-05	0.00200496	0.40366
ALMS1P	2.12e-05	0.00204561	-2.53884
XPC	2.13e-05	0.00204561	-0.478487
HSP90AA1	2.14e-05	0.00204561	1.70173
BCAT1	2.17e-05	0.00205558	0.807916
HPCAL4	2.19e-05	0.00205558	0.973078
BNIP3	2.2e-05	0.00205558	0.711948
S100A9	2.23e-05	0.00207382	0.943493
FES	2.32e-05	0.00212114	-0.57614
PREX1	2.33e-05	0.00212114	-0.468284
ARHGEF3	2.34e-05	0.00212114	-0.677682
RHEB	2.42e-05	0.00218242	0.454244
WDR25	2.5e-05	0.0022328	-0.619464
RP11-640L9.1	2.54e-05	0.00225174	-1.26992
EID3	2.56e-05	0.00225716	0.641786
CTB-31N19.3	2.6e-05	0.00227074	0.806139
SRBD1	2.61e-05	0.00227074	-0.48845
AC074289.1	2.7e-05	0.00232657	-0.77358
FABP5	2.74e-05	0.00233589	1.06902
ASPH	2.76e-05	0.00233589	0.794475
PTPN22	2.76e-05	0.00233589	0.429403
IPO11	2.85e-05	0.00239073	0.475543
PPAP2B	2.88e-05	0.00239849	1.36266
MAN1B1	3.04e-05	0.00251911	-0.564202
CEACAM8	3.12e-05	0.00255663	2.07188
PCBD1	3.15e-05	0.00255663	0.851392
DEPDC1	3.15e-05	0.00255663	0.879772
MYCL	3.25e-05	0.00261961	-1.33276
HSPE1P18	3.31e-05	0.00265212	-0.834592
TAF9	3.45e-05	0.0027459	0.532811
UQCRHL	3.49e-05	0.00275832	1.03478
FGL2	3.54e-05	0.00276477	-1.19719
LMNA	3.54e-05	0.00276477	1.08173
LINC01059	3.59e-05	0.00278675	-1.72388
P4HA2	3.62e-05	0.00278675	1.29928
MPEG1	3.65e-05	0.00279444	-0.809478
CCDC88B	3.72e-05	0.00283385	-0.484491
SCD	3.75e-05	0.00283883	1.05165
ABCA13	3.83e-05	0.00287727	1.36066
STAT5A	3.86e-05	0.002885	-0.584411
AP003041.1	3.94e-05	0.00292576	1.51807
HSPA1A	3.97e-05	0.00292576	1.75831
COL17A1	3.99e-05	0.00292576	1.67756
IRAK3	4.26e-05	0.00309855	0.644244
RGS1	4.29e-05	0.00309855	1.026
IL10	4.32e-05	0.00309855	1.59928
FAM3C	4.32e-05	0.00309855	0.440979
TPI1	4.4e-05	0.0031236	0.738996
CD177	4.41e-05	0.0031236	2.23081
CDK6	4.45e-05	0.00313355	0.525509
S100A12	4.56e-05	0.00318937	1.51823
ZFAND2A	4.58e-05	0.00318937	0.967687
SUGT1	4.67e-05	0.00323157	0.494216
MYH3	4.89e-05	0.00334748	-0.643353
UGCG	4.89e-05	0.00334748	0.79151
FLT1	5.01e-05	0.00339773	1.11743
RAPGEF6	5.02e-05	0.00339773	0.46245
SNRK	5.05e-05	0.00339915	-0.394503
KIAA1257	5.12e-05	0.00342679	-1.04296
HLA-DRB1	5.23e-05	0.00348071	-0.842881
CEBPE	5.29e-05	0.00350437	1.46262
METTL7B	5.35e-05	0.00352599	1.86697
BTN3A3	5.57e-05	0.00364557	-0.770758
KIAA1324	5.59e-05	0.00364557	-1.67629
UPF1	5.65e-05	0.0036617	-0.46422
HMHA1	5.71e-05	0.00368213	-0.384895
SGTB	6.12e-05	0.00392614	0.621093
CARS2	6.27e-05	0.00399879	-0.379876
USP19	6.31e-05	0.0040041	-0.46448
ABCG1	6.34e-05	0.00400693	-1.16452
TMC6	6.44e-05	0.00404549	-0.443936
CCL3	6.55e-05	0.00409429	1.51145
RBM23	6.65e-05	0.00409429	-0.489779
SGCB	6.67e-05	0.00409429	0.613043
SLC7A11	6.68e-05	0.00409429	1.08344
ABCA7	6.68e-05	0.00409429	-0.866559
MME	6.78e-05	0.00411812	-1.79084
CKAP4	6.79e-05	0.00411812	0.779198
PDGFC	7.12e-05	0.0043001	1.10274
PDE4D	7.23e-05	0.00433503	0.533436
ILKAP	7.25e-05	0.00433503	0.431531
LTF	7.41e-05	0.0043894	1.88519
CMB9-22P13.1	7.42e-05	0.0043894	0.934529
MOCS2	7.54e-05	0.00444247	0.498795
PTPN12	7.78e-05	0.00452467	0.515339
PHACTR1	7.78e-05	0.00452467	1.31659
EMP3	7.85e-05	0.00452467	0.621763
ARG1	7.86e-05	0.00452467	1.64687
KCNE1	7.87e-05	0.00452467	0.847198
PLCG1	8.21e-05	0.00470107	-0.493795
CSTB	8.3e-05	0.00473018	0.859801
RCHY1	8.39e-05	0.00476055	0.379752
MAN2C1	8.51e-05	0.00479118	-0.613163
CECR1	8.65e-05	0.00479118	-0.776399
E2F5	8.67e-05	0.00479118	0.486132
TKTL1	8.67e-05	0.00479118	1.03359
RP11-640L9.2	8.71e-05	0.00479118	-1.1983
TSPYL4	8.71e-05	0.00479118	0.609115
RPS3AP6	8.73e-05	0.00479118	1.0083
IL10RA	8.78e-05	0.00479118	-0.40287
CCDC149	8.83e-05	0.00479118	-1.00504
HDGFRP3	8.89e-05	0.00479118	0.672218
SNRNP48	8.91e-05	0.00479118	0.364628
THAP2	8.92e-05	0.00479118	0.551911
TPST2	9.05e-05	0.00484369	0.44972
TRAPPC9	9.11e-05	0.00485261	-0.578095
MRPL1	9.25e-05	0.00490689	0.691591
KBTBD6	9.44e-05	0.00498658	0.761842
ARHGAP25	9.58e-05	0.005039	-0.453099
MMACHC	9.66e-05	0.00505875	0.621583
PHLDA1	9.83e-05	0.00512435	0.951879
STAT1	0.000100907	0.00522686	-0.657777
LIMS1	0.000101099	0.00522686	0.532476
SOD1	0.000101776	0.00523976	0.736061
GAK	0.00010341	0.00530158	-0.36979
JUN	0.000104994	0.00536036	1.03659
ZNFX1	0.000105934	0.0053607	-0.511488
RPL41P1	0.00010659	0.0053607	1.23254
RPS6KA5	0.000106632	0.0053607	-0.691078
DDAH2	0.000107601	0.0053607	0.668539
DACH1	0.000107712	0.0053607	0.758413
PRKRA	0.000107994	0.0053607	0.327595
ST3GAL4	0.00010848	0.0053607	-0.553718
CD80	0.0001085	0.0053607	0.815465
ST13	0.000109368	0.00538187	0.583221
CD24	0.000112369	0.00550744	1.48855
TRIM59	0.000116998	0.0057104	0.40032
HSBP1	0.000117442	0.0057104	0.728311
LINC00662	0.000119763	0.00578422	0.525923
SPRY2	0.000119905	0.00578422	1.37682
LIN9	0.000120707	0.0058001	0.575296
SKIL	0.00012414	0.00592427	0.494803
HEXDC	0.000124258	0.00592427	-0.802475
FCER1G	0.000125333	0.00595232	0.783033
SLCO4C1	0.000125919	0.00595707	0.709599
TGIF1	0.000127988	0.0060132	0.582044
UTRN	0.000128323	0.0060132	-0.70216
DHX35	0.000128577	0.0060132	-0.389448
KLF6	0.000129549	0.00603559	0.378988
ZNF18	0.000130961	0.00607826	-0.475204
HAUS2	0.000135325	0.00625712	0.435785
RPS27L	0.000136069	0.00626789	0.946956
RP11-425L10.1	0.000138919	0.00637517	0.886682
SGOL2	0.000142077	0.00647436	0.715272
FTL	0.000142137	0.00647436	0.570316
SFXN1	0.000143016	0.00649026	0.578298
DOCK2	0.00014424	0.00651579	-0.369803
P2RY1	0.000144642	0.00651579	0.800002
RPL31	0.000145486	0.0065158	1.05076
ZNF136	0.000145837	0.0065158	-0.427662
MT1G	0.000146237	0.0065158	2.18357
SETD3	0.000147142	0.00653237	0.405265
DEFA3	0.000148225	0.00655669	2.71729
ZNF260	0.000149365	0.00658333	0.396151
IGLV4-3	0.000150596	0.0066138	2.91103
MX2	0.000154846	0.00677618	-0.832723
RPL17P50	0.000156716	0.00682257	1.08576
DHX8	0.00015747	0.00682257	-0.373442
ANAPC5	0.000157577	0.00682257	-0.259145
UBC	0.000158595	0.0068425	0.537305
PPA2	0.000167025	0.00718089	0.545687
MAN2B2	0.000168105	0.00720208	-0.43658
EPHB1	0.000171943	0.0073159	-1.22511
GKAP1	0.000171956	0.0073159	0.719733
BTBD3	0.00017305	0.00732423	0.464023
PSME1	0.000173843	0.00732423	-0.513427
PANK3	0.000173945	0.00732423	0.383723
GTDC1	0.000177848	0.00746293	0.432769
GPR155	0.000181495	0.00755146	-0.494654
RPS19	0.000181717	0.00755146	0.552599
RP11-521I2.3	0.000181807	0.00755146	0.652434
KIF13A	0.000186976	0.00773991	-0.549107
SUCLA2	0.000188587	0.00778031	0.405211
NBR1	0.000190108	0.00781675	-0.297439
STRN3	0.000196354	0.00803566	0.345149
TPT1	0.000196743	0.00803566	0.712258
TBCA	0.000200209	0.00815004	0.767275
ARHGAP27	0.000202859	0.00823055	-0.485403
SYNE2	0.000205081	0.0082697	-0.508244
LIPA	0.000205972	0.0082697	-0.505274
MPZL2	0.00020618	0.0082697	-0.957139
CTD-2521M24.9	0.00020667	0.0082697	-0.74179
MCCC1	0.000207486	0.0082697	-0.367378
TAF1	0.000207873	0.0082697	-0.388505
LINC01184	0.000217694	0.00861726	-0.424655
CAMK2G	0.000218387	0.00861726	-0.666235
CHN2	0.000219006	0.00861726	-0.70212
HS3ST3B1	0.000219647	0.00861726	0.731462
PTGER2	0.000220126	0.00861726	0.558887
RBM43	0.000220925	0.008621	-1.00947
GFM2	0.000223364	0.00868852	0.338791
H19	0.000224489	0.00870464	1.85351
RP11-256L6.2	0.00023034	0.00889357	-1.00196
POLR2K	0.000231478	0.00889357	0.789004
SAPCD2	0.000231539	0.00889357	0.968071
TGFBI	0.000234497	0.00896004	-1.01129
RAB23	0.000234732	0.00896004	0.718556
CTBP1	0.000236333	0.00899314	-0.322311
PKM	0.000239764	0.00908005	0.634086
GIMAP8	0.000240578	0.00908005	-0.791875
RPGRIP1	0.00024084	0.00908005	-1.23916
GRAMD1B	0.000244175	0.00917752	-1.47573
VWA5A	0.000245749	0.00920846	0.687752
RP11-473M20.9	0.000247877	0.00925988	-1.08928
TUBB6	0.000248987	0.00927219	0.886834
SEC22B	0.00024972	0.00927219	0.359167
TAP2	0.000251176	0.00929808	-0.767897
FBXO30	0.000253142	0.00931995	0.357009
KIFC3	0.000254849	0.00931995	0.760566
LRRC70	0.000256035	0.00931995	1.05538
RP11-799D4.4	0.000256144	0.00931995	-0.659807
TSPYL2	0.000256796	0.00931995	0.737241
SPATA13	0.00025691	0.00931995	-0.437064
DARS-AS1	0.000257092	0.00931995	0.694621
RPS3A	0.000259593	0.00938289	0.870184
RPL9	0.00026145	0.00942218	1.01857
RPLP1	0.00026251	0.00943267	0.564746
PARVG	0.000263554	0.00943632	-0.420426
AK3	0.000264152	0.00943632	0.354197
CYP19A1	0.000267404	0.00949746	0.815021
PDZK1IP1	0.000267414	0.00949746	-1.43469
RAB11FIP4	0.000268628	0.00951301	-0.550535
ZAP70	0.000270925	0.00954607	-0.317376
AC011747.4	0.00027112	0.00954607	-0.990037
CEACAM6	0.000272119	0.00954668	1.65858
SLC25A40	0.000272695	0.00954668	0.74042
TRIM39	0.000275276	0.00960955	-0.394014
MINPP1	0.000276383	0.00962081	0.696443
RP11-1E4.1	0.000278873	0.009655	-0.499094
SP140	0.000278941	0.009655	-0.605917
TCN1	0.000280268	0.00966799	1.19878
CA4	0.000280895	0.00966799	0.948336
RIPK1	0.000282787	0.00967317	-0.45151
TRMT112	0.000283008	0.00967317	0.579512
PSMB5	0.000283414	0.00967317	0.639862
MRPL45	0.000284571	0.00968568	0.504359
ZCWPW1	0.000289677	0.00983216	-0.561961
RP11-290D2.6	0.000291754	0.00987529	1.1185
ANXA3	0.000293784	0.00991664	0.886852
FANCA	0.000295683	0.00995332	-0.611983
PCSK7	0.000297454	0.00996922	-0.347674
RP11-256L6.3	0.000297783	0.00996922	-1.27341
CSNK1G3	0.000298818	0.0099766	0.476763
HLA-B	0.0003005	0.0100041	-0.490421
GBA	0.000301273	0.0100041	0.690306
DOPEY2	0.000304401	0.0100806	0.587674
AC147651.4	0.000307479	0.0101176	1.08495
TIMP1	0.0003088	0.0101176	0.964424
MYL6	0.000309352	0.0101176	0.707683
PLEKHO1	0.000309543	0.0101176	-0.485062
ADAMTS3	0.000309647	0.0101176	1.49243
CASS4	0.000311478	0.0101179	-0.791247
ATP8B4	0.000312888	0.0101179	0.707674
HMOX1	0.000312916	0.0101179	1.31154
ATP9A	0.00031296	0.0101179	1.08259
SLC41A2	0.000314044	0.0101263	0.744325
CTSD	0.000315777	0.0101554	0.661742
RAD51-AS1	0.000317636	0.0101831	-0.392112
CTSS	0.000318299	0.0101831	-0.498063
RP11-10J5.1	0.000324045	0.0103399	-1.87459
CCT4	0.000326564	0.0103794	0.65298
FBXO21	0.000326975	0.0103794	-0.363629
SDCBP2-AS1	0.000332543	0.0105288	-0.547817
PI3	0.000334996	0.0105545	2.73187
PFDN4	0.000335076	0.0105545	1.08156
SNX16	0.00033854	0.0106218	0.452122
TTK	0.000338946	0.0106218	0.765692
IER5	0.000339945	0.0106259	0.787487
Sep-09	0.000340935	0.0106297	-0.395694
RP11-785H5.1	0.000343611	0.0106814	0.418144
LINC01268	0.000344529	0.0106814	1.39988
GADD45A	0.000345209	0.0106814	0.987484
RCSD1	0.000347332	0.01072	-0.37021
RORA	0.000351604	0.0108246	-0.44018
CDK1	0.000355494	0.0109058	0.788604
USMG5	0.000356597	0.0109058	0.84769
GIMAP4	0.000356911	0.0109058	-0.843292
BCL2L15	0.000368204	0.0112175	1.14745
STAT6	0.000369424	0.0112175	-0.312976
RP11-384K6.6	0.000369859	0.0112175	-0.646911
ARG2	0.00037118	0.0112222	1.08894
RPL24	0.000371846	0.0112222	0.625732
HLA-DPA1	0.000373199	0.0112354	-0.618012
ARNTL	0.000376373	0.0112842	-0.359908
NDUFA4	0.000377325	0.0112842	0.66738
RPS14	0.000377583	0.0112842	0.639258
SPINT1	0.000382198	0.0113669	-1.15757
DRAM1	0.000382206	0.0113669	0.630996
USP14	0.000387876	0.0115052	0.364265
NAA16	0.000388733	0.0115052	0.625313
FCAR	0.000393855	0.0116287	0.749389
UVSSA	0.000398456	0.0117363	-0.467707
PHF6	0.000411715	0.0120977	0.347922
CCDC127	0.00041354	0.0121223	0.431185
GYS1	0.000417674	0.0122142	0.611945
MT1F	0.00041907	0.0122222	1.31936
MBOAT1	0.000419942	0.0122222	-0.464659
IGLV7-46	0.000422965	0.012281	1.66723
TCIRG1	0.00042543	0.0123234	-0.394746
IL1R1	0.000426667	0.0123301	0.706338
RASGEF1B	0.000430409	0.0123682	0.569904
HGF	0.000430729	0.0123682	1.02793
TDRD9	0.000431517	0.0123682	0.906947
ALDH1A1	0.000432208	0.0123682	-1.39187
WEE1	0.000433032	0.0123682	0.462117
DAPK2	0.000434903	0.0123927	-0.853178
RPL39L	0.000437906	0.0124087	0.621761
INSIG1	0.000438395	0.0124087	0.59785
RAB10	0.000438749	0.0124087	0.3362
RTN4	0.000442337	0.0124087	0.423852
AIM2	0.000442957	0.0124087	-0.811504
TRIM21	0.00044306	0.0124087	-0.426972
GLO1	0.000443277	0.0124087	0.419266
SNX14	0.000444038	0.0124087	0.28755
RPS15A	0.00044458	0.0124087	0.724199
DGKE	0.000446844	0.0124436	0.536069
SLC4A8	0.000453513	0.0126007	-0.594208
GABBR1	0.000454617	0.0126028	0.808401
TPRKBP2	0.00045958	0.0126425	-0.511658
ANKFY1	0.000459997	0.0126425	-0.562986
FKBP4	0.00046023	0.0126425	1.22114
RP11-1149M10.2	0.000460446	0.0126425	0.796053
APOL2	0.000461208	0.0126425	-0.711689
TRIM66	0.000462616	0.0126527	-0.667581
IL13RA1	0.000464431	0.0126741	-0.550351
RPL35	0.000466184	0.0126937	0.729959
OTUD1	0.000470164	0.0127736	0.591148
TYMP	0.000472326	0.012804	-0.544757
ELOVL5	0.000473547	0.0128088	-0.383646
KIF18A	0.000488598	0.0131625	0.498307
C1orf52	0.000489483	0.0131625	0.325838
THEMIS2	0.000490335	0.0131625	-0.343869
RPL29	0.000490921	0.0131625	0.478471
YWHAE	0.000492471	0.0131752	0.418569
ARL8A	0.000496728	0.0132602	0.403644
TBC1D1	0.000499145	0.0132944	-0.379794
KIAA1715	0.000500183	0.0132944	0.430387
CPVL	0.000503717	0.0133594	-0.579684
LINC00671	0.000506245	0.0133974	1.25549
PCNP	0.000513795	0.0135679	0.294214
RP11-511B23.2	0.00051503	0.0135713	0.768238
SGOL1	0.000516978	0.0135792	0.47326
TLK1	0.000517544	0.0135792	0.347056
NOP10	0.00052152	0.0136542	0.637753
AK5	0.000522763	0.0136576	-0.885185
SDC4	0.000525896	0.0136742	1.1363
CENPK	0.000527451	0.0136742	0.675653
FKBP3	0.000528325	0.0136742	0.472783
RDX	0.000528796	0.0136742	0.335253
NSMCE2	0.000528978	0.0136742	0.448901
FAM35A	0.000531018	0.013698	0.344407
GJB6	0.000535308	0.0137797	2.36279
SMAD5	0.00054187	0.0139194	0.375917
PEA15	0.000544605	0.0139603	0.485495
CDK5RAP2	0.000548058	0.0140195	-0.42018
PPM1N	0.000555125	0.0141707	0.880318
ARFGAP2	0.000561279	0.0142505	-0.324523
CD83	0.000561367	0.0142505	1.03487
ACYP1	0.000562288	0.0142505	0.460195
LRRC58	0.000563349	0.0142505	0.268977
RNU7-13P	0.000564064	0.0142505	-0.914041
CCL20	0.000567917	0.0143183	2.00058
RP11-466H18.1	0.000579363	0.0145769	1.19626
PPP3CB-AS1	0.000583631	0.0146328	-0.483649
ATP5J2	0.000583974	0.0146328	0.587363
ZNF292	0.000587984	0.0147032	0.385788
DUSP16	0.000593578	0.0147996	0.627209
PSMB9	0.000594255	0.0147996	-0.50512
ATP5C1	0.000604166	0.0150159	0.469368
HBS1L	0.00060736	0.0150647	0.329149
SREK1IP1	0.000618086	0.015279	0.296538
OLA1	0.00061849	0.015279	0.340574
DNAJB6	0.000622672	0.0153513	0.67782
ZKSCAN4	0.000636501	0.0156607	-0.422593
CNIH1	0.000639875	0.0157122	0.348125
ACTRT3	0.000642486	0.0157448	1.76145
BRI3	0.000644224	0.0157559	0.37519
LSM7	0.00065392	0.0159611	0.535453
MYO9B	0.000657578	0.0160185	-0.382367
PELI1	0.000661525	0.0160383	-0.397093
TYK2	0.000661808	0.0160383	-0.3126
CTB-61M7.2	0.000662872	0.0160383	1.0019
C9orf156	0.000663627	0.0160383	-0.310308
METTL5	0.000671301	0.0161918	0.470781
CXCR4	0.00067272	0.0161942	0.699643
COX7A2	0.000682544	0.0163722	0.689282
PHKG2	0.000682785	0.0163722	-0.504232
RPS5	0.000691585	0.0165508	0.546103
SECISBP2	0.000693087	0.0165544	-0.340352
PPP1R12A	0.000695403	0.0165774	0.270475
DCLRE1B	0.000701383	0.0166875	0.574302
SEPW1	0.000705561	0.0167543	0.732481
AHI1	0.00071064	0.0168423	0.4404
SLC2A9	0.000715264	0.0168889	-0.740258
INHBA	0.000715364	0.0168889	1.41396
DEDD2	0.000717034	0.0168958	0.50867
SGMS2	0.000726076	0.017076	0.681787
FAM132B	0.000735066	0.0172543	2.96354
KPNB1	0.000741307	0.0173676	-0.384912
ZNF740	0.000745491	0.0174323	-0.514529
PCSK5	0.000750264	0.0174835	-0.667778
GPR56	0.000750534	0.0174835	-0.896501
DAAM1	0.000759379	0.0176486	0.426643
STRIP1	0.000760504	0.0176486	-0.403467
RPS6	0.000762792	0.0176682	0.671615
NUSAP1	0.000764758	0.0176743	0.647593
FNIP2	0.000765941	0.0176743	0.552246
SLC8A1	0.000770072	0.0177119	-0.538381
MTG2	0.000770574	0.0177119	-0.421324
APOBEC3A	0.000771906	0.0177119	-0.407856
RP11-355N15.1	0.000777566	0.0178084	1.06606
PPP6R2	0.000781588	0.0178671	-0.300576
LARP1B	0.000785513	0.0179235	0.443706
ARMC2	0.000792177	0.0180419	-0.458652
AGFG1	0.000805011	0.0183002	0.425656
RRAGD	0.000807094	0.0183136	0.516388
MCOLN2	0.000810152	0.018349	-0.534743
CCNA1	0.000818666	0.0185076	1.79362
DAPP1	0.000823468	0.0185819	-0.607195
LILRA6	0.000833517	0.0187583	0.640794
COX18	0.000834347	0.0187583	-0.395977
ATP5E	0.000836372	0.0187693	0.643242
CROCC	0.00084158	0.0188517	-0.624878
MEGF6	0.000850384	0.0190022	-1.0598
STK19	0.000851833	0.0190022	-0.413174
ZBTB10	0.000852951	0.0190022	0.388326
COX6A1	0.000863354	0.0191915	0.622137
ATAD1	0.00086458	0.0191915	0.308037
PIGG	0.000870158	0.0192717	-0.360435
PLCB1	0.000871338	0.0192717	-0.526466
RBL2	0.00088113	0.0194531	-0.312514
LARP4	0.000887473	0.0195579	0.34204
MYO1F	0.000901964	0.0198416	-0.379849
RGMB	0.000908192	0.0198929	0.478338
ANO10	0.000909124	0.0198929	0.485258
PHRF1	0.000909798	0.0198929	-0.408674
CD163	0.00091079	0.0198929	1.08324
PAK1	0.000913742	0.0199218	-0.540276
RPS27A	0.000936562	0.0203831	0.721869
FAM105A	0.000938773	0.020395	0.395155
NKG7	0.000940823	0.0203977	0.79693
RPS24	0.000942227	0.0203977	0.805831
PDCD5	0.000951615	0.0205594	0.538457
PECR	0.000954104	0.0205594	0.521964
TXN	0.000955416	0.0205594	0.622106
LRRC45	0.000956408	0.0205594	-0.452079
FEM1B	0.000961248	0.0206273	0.252665
CA12	0.000969577	0.0207696	1.6334
IFIT2	0.000972611	0.0207983	-1.29018
RPL13	0.000975499	0.0208237	0.373034
NUB1	0.000977998	0.0208407	-0.524626
HLA-C	0.000982215	0.0208942	-0.631027
ADAM17	0.00099465	0.0211221	0.336945
DIP2B	0.00100254	0.0212114	-0.334106
LONRF3	0.00100411	0.0212114	0.585656
MAP3K7CL	0.00100457	0.0212114	-0.765451
TTLL1	0.00100578	0.0212114	-0.584487
ANKRD37	0.00100971	0.0212432	0.646948
PAWR	0.00101076	0.0212432	0.519031
PPID	0.00101405	0.021276	0.695934
HIRA	0.00103074	0.0215746	-0.57401
CCPG1	0.0010318	0.0215746	0.473345
RPL34	0.00103699	0.021646	1.18671
SECTM1	0.00104949	0.0218697	-0.689183
MYO1G	0.00105464	0.0219397	-0.357457
RP5-1115A15.1	0.00106371	0.0220908	-0.919096
DOCK8	0.00107081	0.0222007	-0.53632
ITGA9	0.00108134	0.0223257	0.863968
ARMCX3	0.00108163	0.0223257	0.386659
RP4-706A16.3	0.00108492	0.0223257	0.925392
MMP25-AS1	0.00108691	0.0223257	-0.677387
FBXO45	0.00108914	0.0223257	0.370731
MAP2K6	0.00109013	0.0223257	0.571595
SUV39H2	0.0010907	0.0223257	0.504475
SQLE	0.00109141	0.0223257	0.80356
KPNA4	0.00109613	0.0223467	0.273633
CH17-118O6.2	0.00109622	0.0223467	-0.765729
RANBP9	0.00109941	0.0223467	0.383785
C15orf48	0.00109974	0.0223467	1.87148
ATG16L2	0.00110299	0.0223756	-0.67335
UQCRH	0.00113078	0.0228322	0.717713
RPS17	0.0011308	0.0228322	0.897733
BTN3A2	0.00113108	0.0228322	-0.593603
PPP2CB	0.00114681	0.0230967	0.328048
DUSP2	0.00114796	0.0230967	0.750839
SPDYA	0.00115168	0.0231099	0.544136
PLP2	0.00115238	0.0231099	0.749999
RPSAP58	0.00115532	0.0231309	1.00249
PRLR	0.00116164	0.0232196	-0.96972
LAMTOR3	0.00116453	0.0232394	0.352116
EFCAB13	0.00116747	0.0232431	0.579746
RN7SKP71	0.00116851	0.0232431	1.63396
MFF	0.00117077	0.0232503	0.295498
TCAF1	0.00120903	0.0239428	-0.61657
ITGB1BP1	0.00120972	0.0239428	0.347898
GIMAP6	0.0012115	0.0239428	-0.509398
RP11-1277A3.2	0.00121649	0.0240026	-0.627312
FBP1	0.00121948	0.0240055	-0.715502
SLC39A8	0.00122055	0.0240055	1.02312
CDKN3	0.00122798	0.0241129	0.837659
CDK2	0.00123255	0.0241638	0.433926
AKAP13	0.00123759	0.0242239	-0.563703
NAPSB	0.00124282	0.0242695	-0.521681
EHD1	0.00124388	0.0242695	-0.357146
MOB4	0.00124737	0.024299	0.558646
UBE3A	0.00125189	0.0243432	0.23613
HIST1H3B	0.00125362	0.0243432	0.79443
HSD17B12	0.0012568	0.0243664	0.511047
POLM	0.00126478	0.0244726	-0.47163
PID1	0.00126627	0.0244726	-1.1113
BBS2	0.0012688	0.0244829	-0.471941
KLF10	0.00127739	0.0246098	0.587707
PRDX1	0.00128149	0.02465	0.564442
HIST1H4L	0.00128439	0.024667	0.837838
PPARG	0.00130386	0.0250018	1.02121
ZC3H12C	0.00130613	0.0250063	0.910814
ANAPC2	0.00130905	0.025015	-0.490117
HERC6	0.00131067	0.025015	-0.725538
EIF5	0.00131894	0.0251018	0.292514
NDFIP2	0.00131932	0.0251018	0.716653
NMI	0.00132523	0.0251753	-0.414142
RN7SK	0.00132975	0.0252016	0.77773
IFT57	0.00133123	0.0252016	0.510124
ERAP2	0.00133364	0.0252016	-0.903318
HAL	0.00133525	0.0252016	-0.990249
CD1D	0.00133805	0.0252016	-0.712682
GTF3A	0.00133896	0.0252016	0.393883
SCO2	0.00135016	0.0253735	-0.620866
XRCC2	0.00137809	0.0258586	0.583762
KIF20B	0.00138639	0.0259627	0.577906
GYG1	0.00138787	0.0259627	0.522429
TECPR1	0.00139183	0.0259971	-0.357689
SBDS	0.00139599	0.0260351	0.48646
RALA	0.00141527	0.0263547	0.329347
KLF7	0.00142692	0.0265312	0.577267
CD200R1	0.00143024	0.0265526	0.541527
HELZ2	0.00145973	0.0270591	-0.627881
TNFRSF25	0.00146398	0.027097	-0.523183
RPL30	0.00147301	0.027223	0.588362
KAT8	0.00147716	0.0272584	-0.312101
ASPRV1	0.00147978	0.0272658	-1.15193
Sep-04	0.00148787	0.0273737	-1.69046
ATP11B	0.00149257	0.0273889	0.363076
CRISP3	0.00149317	0.0273889	1.53338
DHCR7	0.001496	0.0273999	0.976377
MPPE1	0.00153057	0.0279911	-0.400568
TOMM40L	0.00154531	0.0282186	0.605747
PTPLB	0.00154765	0.0282194	0.404631
PFKFB2	0.00155768	0.0283193	0.751858
HLA-DMB	0.00156	0.0283193	-0.714108
VPS39	0.00156101	0.0283193	-0.388923
ZDHHC3	0.00156241	0.0283193	0.373839
RP11-890B15.3	0.00156469	0.0283193	-0.500061
C5orf24	0.00157295	0.0284267	0.284983
TNFSF14	0.00157903	0.0284582	0.552312
JOSD1	0.00158332	0.0284582	0.47333
DOCK10	0.00159508	0.0284582	-0.367332
MZT2A	0.00159568	0.0284582	0.555826
CROT	0.00159892	0.0284582	-0.352952
OSCAR	0.00159962	0.0284582	0.500157
TMEM126A	0.00160128	0.0284582	0.578011
LAIR1	0.00160203	0.0284582	0.523062
TMEM170B	0.0016029	0.0284582	0.481304
BAG2	0.00160323	0.0284582	0.470145
SMPDL3A	0.00160594	0.0284582	0.903962
HLA-H	0.00160822	0.0284582	-1.11045
PFKM	0.00160981	0.0284582	0.378291
DESI2	0.0016105	0.0284582	0.261376
CLEC1B	0.00161289	0.0284582	0.776292
AEBP2	0.00161351	0.0284582	0.283681
ANKRD13A	0.00161417	0.0284582	-0.389597
RFX5	0.00162256	0.0285649	-0.469895
RP4-620F22.2	0.00162709	0.0285698	-1.27005
AK4	0.00162926	0.0285698	0.91719
CBX7	0.00163065	0.0285698	-0.445867
BBS7	0.00163216	0.0285698	0.27853
GPR84	0.00164228	0.0287059	1.04761
CMTR1	0.00165128	0.0288221	-0.622721
IRF2BP2	0.00166021	0.0289368	0.355476
PKP2	0.00166424	0.0289659	0.752373
SOWAHC	0.0016788	0.0291305	0.689252
CD160	0.00167891	0.0291305	-0.965039
SPON2	0.00168395	0.0291305	-0.575747
CMTM5	0.00168422	0.0291305	1.1586
N4BP2	0.00168559	0.0291305	0.296208
REM2	0.00169477	0.0292478	-0.963558
RPS18	0.00170652	0.0294092	0.634403
ZCCHC10	0.00171922	0.0295691	0.479742
RPS13	0.00172062	0.0295691	0.402834
CD33	0.00172394	0.0295847	-0.756794
OPN3	0.0017277	0.0295998	0.375974
DCUN1D5	0.00172965	0.0295998	0.479982
TRIM56	0.0017331	0.0296175	-0.418299
CRYZ	0.00173827	0.0296643	0.649501
BIN3	0.00175216	0.0298599	-0.304553
MORF4L2	0.00176809	0.0300894	0.51455
NLRP1	0.00177652	0.0301911	-0.672707
CCT2	0.00178525	0.0302974	0.50657
AP3S1	0.00178866	0.0303132	0.353924
CD300LD	0.00179136	0.0303171	-1.49669
RPL38	0.00179935	0.0304103	0.389159
CSF1	0.00180456	0.0304259	0.760995
SUZ12	0.00180525	0.0304259	0.311551
SQSTM1	0.00182034	0.0306155	0.498582
RGL4	0.00182311	0.0306155	1.0467
FAM72B	0.00182398	0.0306155	0.704839
AC011816.1	0.00182921	0.0306407	-0.86232
RP11-298I3.1	0.00183049	0.0306407	-0.905048
CD58	0.00184234	0.0307559	0.334543
C17orf67	0.00184239	0.0307559	0.849531
C4BPA	0.00185184	0.0308715	-1.60991
RP11-597D13.9	0.00185657	0.0309083	-0.875667
BHLHE41	0.00186287	0.0309411	0.522158
RALGAPA1P	0.00186359	0.0309411	0.629723
RP11-321E2.4	0.00187383	0.0310274	-1.03693
CEP250	0.00187385	0.0310274	-0.283562
RASGEF1A	0.00188199	0.0311201	0.61321
DYNC1I2	0.00189238	0.0312498	0.252207
ZNF788	0.00189963	0.0312964	0.628213
NUTF2	0.00190031	0.0312964	0.461244
NKRF	0.00190506	0.0313324	0.448238
GAS2L3	0.00192917	0.0316865	0.51753
GNA15	0.00193686	0.0317702	0.652272
RP11-335I12.2	0.00194828	0.0318774	0.858973
ATP6V1E2	0.00195052	0.0318774	-0.480168
ARL3	0.00195244	0.0318774	0.637205
CLCN4	0.0019538	0.0318774	-0.829605
FAM96B	0.00196932	0.0320771	0.600646
GSTO1	0.00197233	0.0320771	0.648049
CHML	0.00198105	0.0320771	0.429298
CRYBG3	0.00198107	0.0320771	-0.38196
PTPLAD1	0.00198155	0.0320771	0.297772
SLCO4A1	0.00198175	0.0320771	1.0701
TTC12	0.00198465	0.0320777	-0.47974
RNF31	0.00198805	0.0320777	-0.415501
NEDD1	0.00198964	0.0320777	0.338471
TSPAN13	0.00200937	0.0323465	0.528466
RP11-230F18.5	0.00201159	0.0323465	0.606321
KIR3DL2	0.00201472	0.0323544	1.07901
CEP70	0.00202022	0.0323881	0.474185
ATP2C1	0.00202452	0.0323881	0.340767
WDR73	0.00202475	0.0323881	-0.321983
RP11-872J21.5	0.00203261	0.0324714	0.548438
APOL3	0.00203855	0.032524	-0.76764
MRC2	0.00205808	0.0327928	-1.29276
TMEM144	0.00206967	0.0329346	-0.923477
FMO5	0.00208517	0.0331382	-0.639244
RPL23	0.00209814	0.0333012	0.802726
ANKRD12	0.002102	0.0333193	0.392885
EIF3J	0.00211512	0.0334839	0.390764
FCER1A	0.00212232	0.0335545	-1.98257
AMPD2	0.00212813	0.0335713	-0.542646
KIAA0100	0.00213043	0.0335713	-0.29894
RP11-423P10.2	0.0021316	0.0335713	0.468477
SMC4	0.00214277	0.0336825	0.383803
CORO1B	0.0021543	0.0336825	-0.41584
TNFRSF14	0.00215482	0.0336825	-0.387584
PI4K2A	0.00215618	0.0336825	0.623854
PPIL4	0.00215719	0.0336825	0.321093
ZNF609	0.00215789	0.0336825	-0.410401
GOLGA2P5	0.0021579	0.0336825	-0.799222
NAB2	0.00217123	0.0337953	0.706429
TWSG1	0.00217391	0.0337953	0.537005
RPL41	0.00217513	0.0337953	0.61631
ZNF706	0.00218089	0.0337953	0.412574
RNF213	0.00218149	0.0337953	-0.731536
STX10	0.00218168	0.0337953	-0.455905
ARFIP1	0.00219316	0.0339074	-0.391668
RCBTB2	0.00219572	0.0339074	-0.547166
NUDT4	0.00219721	0.0339074	0.558294
MMP9	0.00220025	0.0339115	1.21422
HOMER1	0.00220339	0.0339173	0.450991
MPO	0.0022094	0.0339671	1.90002
ZCCHC9	0.0022174	0.0340474	0.388083
RRAGC	0.0022234	0.0340969	0.36813
RP6-159A1.4	0.00223756	0.0342711	0.641212
TRIM38	0.00226049	0.034579	-0.363736
KIAA1407	0.00226553	0.0345838	-0.412404
AMOTL1	0.00226703	0.0345838	1.01894
SAMSN1	0.00226927	0.0345838	0.680645
RP11-730K11.1	0.00227421	0.034616	-0.716084
JRKL	0.0022785	0.0346383	0.386274
STAMBP	0.00228138	0.0346392	-0.292665
TUBGCP6	0.00228817	0.0346992	-0.382851
IL12RB1	0.00229355	0.0347378	-0.504754
PRKACB	0.0022987	0.0347728	0.292735
RRM2B	0.00230641	0.0348465	-0.32257
TMA7	0.00231409	0.0348799	0.904327
NHS	0.00231432	0.0348799	-1.08532
UBN1	0.00232125	0.0349414	-0.494555
HAUS4	0.00232831	0.0350046	-0.551314
C7orf73	0.00234608	0.0352287	0.514916
CENPA	0.0023526	0.0352832	0.72729
FOLR3	0.00239683	0.0359027	1.51763
CA2	0.00240715	0.0359725	1.12677
LPAL2	0.00240736	0.0359725	-0.78053
DHTKD1	0.0024211	0.0361337	-0.336406
BCL9L	0.0024501	0.036522	-0.803497
RGCC	0.00246297	0.0366692	0.66058
ZBTB21	0.0025033	0.0372244	0.314062
FAM102B	0.002512	0.0373085	0.301497
MCM9	0.00251959	0.0373759	-0.285276
MS4A3	0.00253581	0.0375688	1.57483
VPS41	0.00253872	0.0375688	-0.309196
IRF1	0.00254386	0.0375987	-0.381959
TBC1D22A	0.00254688	0.0375987	-0.279287
LY75	0.00255576	0.0376844	-0.398849
ZNF770	0.00256121	0.0377193	0.336141
AL161784.1	0.00256947	0.0377912	0.840206
KCTD6	0.00257506	0.0377912	0.342408
SOAT1	0.00257534	0.0377912	-0.291853
Sep-11	0.00258242	0.0378497	0.313677
MRPL3	0.00258636	0.0378622	0.479678
IFIT3	0.00259755	0.0379807	-1.23796
EEF1E1	0.00260545	0.0380169	0.506566
APOL1	0.00260864	0.0380169	-0.812018
RBM6	0.00261202	0.0380169	-0.318745
CTD-2165H16.3	0.00261452	0.0380169	0.735562
RP11-18B3.2	0.00261554	0.0380169	0.766189
C18orf54	0.0026215	0.0380583	0.414239
ZBED6	0.00263091	0.0381497	0.466209
RPL27A	0.00263628	0.0381825	0.468628
DSTN	0.00264716	0.0382948	0.402279
SLC1A4	0.00268854	0.0387551	0.554093
SDC2	0.00268986	0.0387551	1.2641
PCBP1-AS1	0.00269663	0.0387551	-0.588972
C6orf48	0.00270339	0.0387551	0.436504
SGMS1-AS1	0.00270388	0.0387551	-0.604847
UPB1	0.0027042	0.0387551	1.11679
VPS26A	0.00271035	0.0387551	0.290572
MEX3C	0.00271231	0.0387551	0.247627
PATL2	0.00271246	0.0387551	-0.514602
ZBP1	0.00271347	0.0387551	-0.671402
SAMD4A	0.00271652	0.0387551	-0.962742
CSNK1G2P1	0.00271694	0.0387551	-0.638704
GPR171	0.0027261	0.0388406	0.53326
ALPK1	0.00274556	0.0390319	-0.481173
SMIM3	0.0027459	0.0390319	0.565599
LINC01138	0.00275681	0.0391415	-0.59905
CST7	0.00278372	0.0394512	0.765848
ADAR	0.00278505	0.0394512	-0.438708
C19orf66	0.00279057	0.0394837	-0.439575
PARP8	0.00280922	0.0397017	-0.395051
MANBA	0.00281627	0.039713	-0.403065
KATNBL1	0.00281758	0.039713	0.385054
RP11-51F16.1	0.00281974	0.039713	-0.429752
ANKRD18A	0.00283938	0.0398926	0.849357
EXOC3	0.00284178	0.0398926	-0.411854
GALT	0.00284227	0.0398926	-0.348963
SP140L	0.00285666	0.0400488	-0.425726
CTSB	0.00288851	0.040449	0.518378
RSL24D1	0.00290439	0.0406249	0.60998
HSP90AB1	0.00290902	0.0406434	0.793305
TMCO3	0.0029244	0.0407719	0.476272
S100A10	0.00292677	0.0407719	0.43845
MIR17HG	0.00292821	0.0407719	0.391286
TRAPPC6B	0.00294043	0.0408956	0.243783
ENTPD1-AS1	0.00295063	0.0409805	-0.318502
ZNF276	0.00295322	0.0409805	-0.335193
MRPL18	0.00295792	0.0409993	0.693294
GBP5	0.00296979	0.0411173	-0.921363
DPM1	0.00297461	0.0411377	0.39515
TRIM13	0.00299255	0.041339	0.282102
C5	0.00300009	0.0413965	-0.678421
CTC-490G23.4	0.00302015	0.0416264	1.80757
TMX4	0.00303546	0.0417805	-0.495624
RP11-421E14.2	0.00303814	0.0417805	0.409998
PGK1	0.00304672	0.0418083	0.395322
ACTR10	0.00304699	0.0418083	0.316359
CRISPLD2	0.00305252	0.0418373	-0.869581
PLEKHG3	0.00305695	0.0418422	-0.592184
RP11-629N8.4	0.00305971	0.0418422	-0.695965
HDAC2	0.00306785	0.0418728	0.266771
LINC00998	0.00307257	0.0418728	0.567026
VSTM1	0.00307673	0.0418728	0.968771
GALNT6	0.00307914	0.0418728	-0.44706
TRAFD1	0.00308087	0.0418728	-0.487229
HSPA4	0.00308245	0.0418728	0.582186
RPAP2	0.00310836	0.0421779	0.267748
BAG4	0.00311744	0.0422104	0.387674
HSBP1L1	0.00311938	0.0422104	0.799784
ATP13A3	0.00312108	0.0422104	0.490237
MAP4K3	0.00313397	0.042338	0.319768
SCN8A	0.00313936	0.0423641	1.07759
TCP1	0.00315704	0.0424918	0.567282
EML3	0.00315891	0.0424918	-0.442488
CD163L1	0.0031611	0.0424918	0.856565
ARRDC4	0.00316807	0.0424918	0.773969
MED31	0.00316858	0.0424918	0.340544
TAPBPL	0.00317232	0.0424918	-0.506828
RPL10A	0.0031731	0.0424918	0.4235
ITGAL	0.00318594	0.0425838	-0.412039
LTA4H	0.00318692	0.0425838	-0.589556
PPP1R15A	0.00320611	0.0427935	0.447358
MYCBP2	0.00321339	0.0428426	-0.425414
ITM2B	0.00321678	0.0428426	-0.427726
VPS45	0.00322033	0.0428434	-0.253337
TBC1D2	0.00322692	0.0428844	0.610205
PRR5L	0.00324499	0.0430778	-0.901108
CLIC4	0.00325347	0.0431437	0.523897
COMMD3	0.00326866	0.0432983	0.59121
EIF2B5	0.00327829	0.0433246	-0.294353
RP1-193H18.2	0.00328013	0.0433246	0.578856
BCAP29	0.00328125	0.0433246	0.32176
EAF2	0.00328695	0.0433531	0.362647
HIST1H3J	0.00329786	0.0434399	0.720688
COX7B	0.00330062	0.0434399	0.601769
TMEM38B	0.00331229	0.0435467	0.517726
COPS2	0.0033197	0.0435973	0.404359
PSMB10	0.00332928	0.0436515	-0.541911
ZNF33A	0.00333096	0.0436515	-0.378873
PTBP2	0.00333945	0.0436515	0.38777
DBI	0.00334154	0.0436515	0.653594
SNX25	0.00334245	0.0436515	0.294268
UBFD1	0.00334554	0.0436515	0.312862
EME1	0.00334876	0.0436515	0.631805
HAVCR2	0.00336495	0.0438159	0.587566
FAM60A	0.00337262	0.0438692	0.250016
CHFR	0.00338171	0.0439408	-0.243077
GBP6	0.00338585	0.0439479	-1.41662
ANKRD55	0.00338947	0.0439484	0.614618
WDR83OS	0.00339469	0.0439695	0.756342
RN7SKP203	0.00340415	0.0440319	1.36584
LRRC75A-AS1	0.00340766	0.0440319	0.595482
EVL	0.0034123	0.0440319	-0.403348
DHX57	0.00341389	0.0440319	-0.298807
ANXA1	0.00344327	0.0443642	0.467335
PIK3CD	0.0034478	0.044376	-0.346505
H6PD	0.00346253	0.0445073	-0.551895
FBXL14	0.0034675	0.0445073	0.771118
KCNQ1	0.0034693	0.0445073	-0.666369
TCTEX1D1	0.00347253	0.0445073	0.901246
MMRN1	0.00347881	0.0445411	1.14257
RAB3IP	0.00348827	0.0446156	0.350868
TRMT12	0.00349529	0.0446588	0.358365
KPNA2	0.00350133	0.0446893	0.451798
TLR7	0.00350504	0.0446901	-0.541631
TNIP3	0.00353228	0.0449487	1.43559
LINC00989	0.00353265	0.0449487	-0.894219
IRAK4	0.00355883	0.0452349	-0.252503
DDIT4	0.00357076	0.0453394	0.645535
AHSA1	0.00358017	0.0453649	0.835368
TEC	0.00358017	0.0453649	0.541196
RP11-426C22.5	0.00360214	0.045596	-0.658304
ZNF587B	0.0036076	0.045618	-0.366811
VCAM1	0.00361469	0.0456479	1.52106
GTF3C3	0.00361741	0.0456479	0.292649
MOV10	0.00362388	0.0456826	-0.71394
CENPE	0.00362956	0.0457072	0.614522
ARHGAP11A	0.00364054	0.0457984	0.477852
CSPP1	0.00364801	0.0458452	0.267573
KCNJ2	0.00365455	0.0458656	-0.622193
TNFSF10	0.00365712	0.0458656	-0.715488
DNAJA1	0.00368204	0.0461147	0.695587
PNMA1	0.00368451	0.0461147	0.425558
PSMD14	0.00368892	0.0461187	0.431416
PIWIL4	0.00369302	0.0461187	0.588456
RASSF5	0.00369849	0.0461187	-0.270787
CCDC93	0.00370355	0.0461187	0.39384
LIN7A	0.00370655	0.0461187	0.473152
MMAA	0.00370998	0.0461187	-0.324515
KCTD9	0.00371117	0.0461187	0.289634
CD46	0.00373133	0.0462746	-0.424365
PFKL	0.00373441	0.0462746	-0.332447
UBE2K	0.00373505	0.0462746	0.233068
ZNF710	0.00374883	0.0463545	-0.445946
CTC-575D19.1	0.00374907	0.0463545	1.23784
COA1	0.00375745	0.0464054	-0.385387
CD101	0.00376333	0.0464054	-0.777421
ING2	0.00377358	0.0464054	0.480621
C9orf3	0.00377362	0.0464054	-0.334058
VBP1	0.00377377	0.0464054	0.438085
BBS4	0.0037759	0.0464054	-0.371685
ARSD	0.00378773	0.0465041	-0.532609
NAPG	0.00381793	0.046828	0.299154
RNF114	0.0038272	0.0468801	-0.389485
ST3GAL5	0.00382984	0.0468801	-0.376552
SUB1	0.00383726	0.0469241	0.586757
SPG11	0.00384814	0.0470102	-0.310547
MZF1	0.00388114	0.0473662	-0.416231
RP11-705C15.3	0.00389248	0.0474131	-0.48269
MLYCD	0.00389272	0.0474131	-0.537021
COMMD6	0.00390282	0.0474473	0.871784
NDUFAF2	0.00390708	0.0474473	0.701091
EFCAB2	0.00390715	0.0474473	-0.958291
BMI1	0.00392787	0.0476517	0.344315
UNC93B1	0.00395837	0.0479742	-0.556317
AP000783.1	0.0039763	0.0481438	-1.20413
FAM175B	0.00398658	0.0481989	0.341816
CENPQ	0.00398871	0.0481989	0.554527
NUF2	0.00401405	0.0484573	0.607591
MX1	0.00402987	0.0486004	-1.05168
RPS25	0.00403389	0.048601	0.543016
ITGB2	0.00404037	0.0486287	-0.400941
DPEP2	0.00404413	0.0486287	-0.713861
PARPBP	0.00405091	0.0486423	0.448382
KPNA3	0.00405319	0.0486423	0.269734
LDLRAD3	0.00407002	0.0487304	0.870744
ZSCAN16	0.00407381	0.0487304	-0.448253
ELAC2	0.00407417	0.0487304	-0.287258
RP11-815J21.2	0.00407671	0.0487304	-0.701877
UBE2N	0.00408042	0.0487304	0.238497
POLD3	0.00408875	0.0487574	-0.345718
SUSD3	0.00409331	0.0487574	0.61762
CLCN7	0.00409462	0.0487574	-0.525262
TK2	0.00411804	0.0489887	-0.421078
HERC3	0.00415412	0.0493697	-0.447007
HP	0.00415813	0.0493697	1.35871
RP11-403I13.8	0.00416614	0.0494169	-0.594961
STIP1	0.00418064	0.0495409	0.849494
CHD8	0.00423148	0.0500684	-0.28948
RPS7	0.00423333	0.0500684	0.591127
PAPD5	0.0042374	0.0500684	0.243544
CCDC84	0.00424302	0.0500865	-0.346742
POLR3G	0.0042539	0.0501665	0.51039
STAT2	0.00426012	0.0501724	-0.618069
UBE2G1	0.00426258	0.0501724	0.355556
FXR1	0.0042709	0.050222	0.503941
HIP1	0.00430229	0.0505207	0.529061
RB1	0.00430454	0.0505207	0.23956
POLR2H	0.0043124	0.0505644	0.399099
CHEK2	0.00432603	0.050597	0.318244
ZNF485	0.00432649	0.050597	-0.494695
GLIPR1	0.00432756	0.050597	-0.530222
C1orf122	0.00433646	0.0506526	0.588032
FAM222B	0.00435106	0.0507748	-0.680645
MAP3K5	0.00436136	0.0508465	-0.312206
STARD4	0.00438323	0.0510529	0.400493
MBNL2	0.00439418	0.0511319	0.502919
FMO4	0.00440551	0.0511787	-0.471399
MTHFD2L	0.00440656	0.0511787	0.310489
ANLN	0.00441795	0.0512142	0.676625
FYCO1	0.00441797	0.0512142	-0.377544
SOCS5	0.00443262	0.0513354	0.325544
IL21	0.00444516	0.0514321	0.928149
RP11-430C7.5	0.00445083	0.0514491	-0.837126
DIS3L2	0.00445838	0.0514878	-0.379616
ELL	0.00447412	0.0516209	-0.389396
TMEM263	0.00448188	0.0516618	0.375414
PLD1	0.00449559	0.0517711	0.497603
FCHSD1	0.00452876	0.0520841	-0.444224
HIBCH	0.00453127	0.0520841	0.484848
ERMARD	0.00454116	0.0521488	-0.280948
RAB11FIP1	0.00457258	0.0524605	-0.409635
EXOC7	0.00458206	0.0525201	-0.257171
F2R	0.00461507	0.052849	0.467923
RP11-151A6.4	0.00462727	0.0529346	-0.540788
GADD45GIP1	0.0046322	0.0529346	0.599405
CCR3	0.00463551	0.0529346	-1.06211
IFNG	0.00464046	0.0529418	0.769282
DHX58	0.00468013	0.0533112	-0.966659
CNEP1R1	0.00468153	0.0533112	0.251698
C16orf87	0.00468766	0.0533314	0.393807
MS4A2	0.0047116	0.053547	-1.4264
CEACAM1	0.00471535	0.053547	0.785184
PKNOX1	0.00473222	0.0536888	0.430911
RPS6KA1	0.00475708	0.0538899	-0.290634
DISC1	0.00476047	0.0538899	-0.552411
MGLL	0.00476314	0.0538899	0.621271
TCTA	0.00477478	0.0539436	0.401047
LINC01215	0.00477998	0.0539436	-0.36298
LYPLAL1	0.0047811	0.0539436	0.354545
GINS1	0.00481347	0.0542589	0.572042
CXCR2	0.00484908	0.0546101	-0.582432
GAA	0.00487567	0.0548591	-0.634922
GPR137B	0.00488525	0.0549055	0.633962
SNRPD2	0.00488875	0.0549055	0.648635
BTG3	0.0049034	0.0549766	0.385485
CEP63	0.00491147	0.0549766	-0.410359
LDLR	0.00491297	0.0549766	0.585684
SH2B1	0.00491303	0.0549766	-0.515474
DDX58	0.00492294	0.0550216	-0.644629
OMG	0.00492604	0.0550216	0.516368
PQLC3	0.00493559	0.0550781	-0.336962
HSPA1L	0.00494983	0.0551868	0.52909
TTC39C	0.00500238	0.0556992	-0.455011
CDCA7L	0.00500736	0.0556992	0.381131
ZCCHC6	0.00501223	0.0556992	-0.389576
SNRNP200	0.00501398	0.0556992	-0.323415
LAMP3	0.00502299	0.0557488	-1.33794
PASK	0.00507266	0.0562492	-0.363925
CEP164	0.00507752	0.0562521	-0.375016
ANKRD28	0.00510435	0.0564983	0.433647
DNAJC11	0.00511597	0.0565758	-0.313204
TRGV10	0.0051333	0.0567163	-0.659127
GAS5	0.00514077	0.0567476	0.442362
SLC27A3	0.00517913	0.0571196	-0.603546
WDR44	0.00518421	0.0571242	0.304835
IFI16	0.00520194	0.057268	-0.402401
ARHGEF6	0.00524742	0.0576986	-0.315812
PLCB2	0.00525046	0.0576986	-0.6006
DHX38	0.00527975	0.0579156	-0.321474
NDUFA6	0.0052854	0.0579156	0.571784
RPS27	0.00529431	0.0579156	0.557754
LMAN2L	0.00529455	0.0579156	0.426475
RUFY4	0.00529686	0.0579156	-1.54242
ULK4	0.00530236	0.0579156	-0.367867
VPS37A	0.00530558	0.0579156	0.212084
POLK	0.00531194	0.0579156	0.277946
IL1B	0.00531275	0.0579156	-0.576801
TSC2	0.00532292	0.0579748	-0.427313
AE000661.37	0.00534021	0.0580715	-0.942656
MSRB3	0.00534324	0.0580715	0.578585
ERO1L	0.00534601	0.0580715	0.317749
CEBPG	0.00537898	0.0583779	0.301757
IFI35	0.00541745	0.0587434	-0.663429
XKR8	0.00542646	0.0587891	-0.576006
ISY1	0.00546977	0.0592059	0.346149
MTDH	0.0054806	0.0592708	0.322958
EZR	0.00549324	0.0593059	0.445396
BRD3	0.00549384	0.0593059	-0.432996
IGF2R	0.00549837	0.0593059	-0.510867
CDK10	0.0055105	0.0593845	-0.363077
KLHL2	0.00551741	0.0594067	0.248224
RWDD1	0.00553066	0.0594971	0.3347
CSRP2BP	0.00556403	0.0598036	-0.333914
ELANE	0.00556967	0.0598117	2.12301
PDCD4	0.00558043	0.0598748	-0.255397
PEAK1	0.00559883	0.0599735	0.409214
SLC35A5	0.00559942	0.0599735	-0.324195
MRPL50	0.00560961	0.0600302	0.323417
CTC-534A2.2	0.00562625	0.06011	0.419148
ECI2	0.0056278	0.06011	0.355873
RP1-29C18.8	0.00563291	0.06011	-0.712423
MIEF1	0.00563669	0.06011	0.382587
PANK2	0.00567431	0.0604585	-0.253926
IGLV1-44	0.00568322	0.0605008	1.38197
RNF40	0.00572488	0.0608425	-0.270061
TMCC1	0.00572525	0.0608425	-0.323428
MYO15B	0.00574391	0.060988	-0.475999
TOMM22	0.0057535	0.0610369	0.399273
CCL4	0.00576778	0.0611354	0.99086
CPNE8	0.00579213	0.0613405	0.381616
JUND	0.00579826	0.0613524	0.638007
FCGRT	0.00581634	0.0614906	-0.442888
MAPK6	0.00582174	0.0614947	0.381429
ATXN7	0.00585399	0.061782	-0.487911
PAFAH1B2	0.0058733	0.0619325	0.231733
RPL26	0.00589136	0.0620695	0.709465
DPY19L3	0.00592213	0.0623401	0.426954
UBE2F	0.00592864	0.062355	0.393834
TLR6	0.0059391	0.0623835	-0.485738
CCNL2	0.00594152	0.0623835	-0.295272
PRPF39	0.0059579	0.0625018	0.245901
SORBS1	0.00596521	0.062525	0.633237
OAS3	0.00597401	0.0625638	-0.999866
IGLV1-40	0.00598288	0.0625646	1.38136
ALDH1A2	0.0059843	0.0625646	0.519408
TEX10	0.00600378	0.0626336	0.222832
GLS	0.00601081	0.0626336	0.328959
IGKV3D-20	0.00601164	0.0626336	1.62569
HIST1H2BL	0.00601363	0.0626336	0.689945
NDUFAB1	0.00601675	0.0626336	0.501176
PCBP1	0.00602157	0.0626336	0.326405
SLC39A1	0.0060336	0.0627055	0.462323
ZNF586	0.00609459	0.0632698	-0.241896
RARRES3	0.00609823	0.0632698	-0.86503
MIR222HG	0.0061093	0.063331	0.661205
H3F3AP6	0.00616143	0.0637742	-1.31734
LDB1	0.00616246	0.0637742	-0.28732
NUDC	0.00621494	0.064263	0.559278
LSP1	0.00624691	0.0644968	-0.379622
ADIPOR2	0.00625406	0.0644968	0.276235
TTC26	0.00625845	0.0644968	-0.592167
PRKRIR	0.00625861	0.0644968	0.276845
RSAD2	0.00627742	0.0645898	-1.53252
ARMCX6	0.00627818	0.0645898	0.437065
SVIP	0.00631975	0.0649631	0.502988
SCAND2P	0.00632876	0.0650011	-0.327982
DEPDC1B	0.00635105	0.0651754	0.562762
CD74	0.00642706	0.0659002	-0.699637
MT2A	0.00644416	0.0660204	0.932844
BPNT1	0.0064742	0.0662145	0.353736
RP11-902B17.1	0.00647987	0.0662145	-0.445705
ITPR3	0.00648053	0.0662145	-0.367905
KBTBD8	0.00648473	0.0662145	0.395119
AC010761.8	0.00649614	0.0662553	0.802371
CAMTA1	0.00649954	0.0662553	0.328891
EEF1B2	0.00651132	0.0663202	0.723684
SIPA1L1	0.00652303	0.0663843	-0.425339
DBF4	0.0065352	0.06641	0.342836
UQCR10	0.00653639	0.06641	0.518967
ACER3	0.00654951	0.0664249	0.324274
IL10RB-AS1	0.00655357	0.0664249	0.413821
PHB	0.00655473	0.0664249	0.398683
CRY1	0.00655954	0.0664249	0.265098
UBR2	0.00657317	0.0665079	-0.342564
TOMM7	0.00658983	0.0666064	0.69074
RP11-299A16.1	0.00659377	0.0666064	0.685117
COPS4	0.00661254	0.0667168	0.396924
FNIP1	0.0066156	0.0667168	0.291679
MDM2	0.00662768	0.0667627	0.250429
LRSAM1	0.00663559	0.0667627	-0.341428
KDM4A	0.00663888	0.0667627	-0.269784
PSMD10	0.00664194	0.0667627	0.399801
PPP2R5C	0.00667107	0.0669389	-0.216892
GZMK	0.00667184	0.0669389	0.499027
PARP14	0.00667586	0.0669389	-0.610128
TMEM43	0.00668895	0.0670153	-0.239267
KAT7	0.00671398	0.0671763	-0.275814
FUT4	0.00671696	0.0671763	0.371273
DEPDC5	0.00672147	0.0671763	-0.240477
F2RL1	0.00673626	0.0672693	-1.00094
RPS29	0.00674675	0.0673192	0.50248
ZSCAN25	0.00675235	0.0673202	-0.260619
AC079325.6	0.00679397	0.0676801	-0.945583
INPP5F	0.00682855	0.0679251	0.284538
PHF1	0.00682965	0.0679251	0.434239
NECAB1	0.00687915	0.0683619	1.23638
ADAMTSL4-AS1	0.0069238	0.0687499	-0.608156
ATL2	0.00693256	0.0687811	0.240572
RBM4	0.00694243	0.0688157	-0.339676
SERBP1	0.00694875	0.0688157	0.2367
SMIM12	0.00695319	0.0688157	0.240581
EIF5B	0.00695851	0.0688157	0.232205
FGD2	0.00697676	0.0689405	-0.384808
PRC1	0.00699187	0.0690295	0.50913
CEP112	0.00699703	0.0690295	0.446051
GNPDA1	0.00701731	0.0691738	0.465586
TCEAL3	0.00702996	0.0692429	0.706839
FAM83D	0.0070453	0.0693376	0.51237
TIMD4	0.00705117	0.0693376	0.983157
CLDN12	0.00706172	0.0693376	0.589028
LRRK2	0.00706222	0.0693376	-0.475381
INPP4A	0.00706923	0.0693509	-0.35219
MS4A4A	0.00707515	0.0693535	0.715039
LINC00847	0.00709822	0.069524	0.454421
CCDC7	0.0071188	0.0696635	0.259216
EPHA4	0.00712383	0.0696635	-0.451186
ARFGAP3	0.00713765	0.0697429	0.423332
MIA3	0.0071815	0.0700671	-0.334461
SEC24A	0.00718226	0.0700671	0.359715
GPR180	0.00720149	0.0701987	0.311324
MRGBP	0.00721442	0.0702134	0.472384
CPEB4	0.00721964	0.0702134	0.320975
TMEM256	0.00722289	0.0702134	0.890599
RP11-701H24.4	0.00723524	0.0702134	0.72592
ZNF217	0.00724142	0.0702134	-0.278704
KCNN4	0.00724851	0.0702134	0.569755
MIR6723	0.0072513	0.0702134	-3.46482
GIGYF1	0.00725437	0.0702134	-0.418793
RHOC	0.00725809	0.0702134	0.538647
PHYKPL	0.0072603	0.0702134	-0.36286
CADM1	0.00727581	0.070308	0.8281
DSCC1	0.00728265	0.0703186	0.588583
NUP35	0.00729322	0.0703652	0.272653
MAN1A2	0.00731021	0.0704736	0.369735
MUM1	0.00732822	0.0705749	0.65933
SUSD1	0.00733224	0.0705749	-0.249797
TMTC4	0.00734483	0.0706407	-0.432162
KRT23	0.00736683	0.0707783	-0.877504
ATP5S	0.00737069	0.0707783	-0.444148
RAB6B	0.00738902	0.0708988	1.16014
CDYL2	0.00740209	0.0709525	0.351342
TAGAP	0.00741304	0.0709525	-0.387965
MAD1L1	0.00741765	0.0709525	-0.272052
BLOC1S5	0.00741778	0.0709525	0.264094
SLC38A2	0.0074581	0.0712462	0.303116
DPH3	0.00746012	0.0712462	0.296345
NEURL4	0.0075021	0.0715225	-0.327314
ST8SIA4	0.00750552	0.0715225	-0.245509
VPS4B	0.00750656	0.0715225	-0.234746
TOP3B	0.00751824	0.0715781	-0.301778
BMPR1A	0.0075332	0.071651	0.3371
HIST1H4F	0.0075376	0.071651	0.641322
SP110	0.00755766	0.0717861	-0.504938
C14orf166	0.00758825	0.0720207	0.2445
VNN1	0.00760656	0.0721272	0.701458
UBALD2	0.00761124	0.0721272	0.409203
ERCC5	0.00762279	0.0721809	-0.248817
SLIRP	0.00763188	0.0722112	0.645887
SETD8	0.00766076	0.07236	0.311283
CTTNBP2NL	0.0076726	0.07236	0.557265
CTD-2215E18.1	0.00767884	0.07236	0.669791
BOD1L1	0.00768171	0.07236	-0.242925
ALPL	0.00768178	0.07236	0.773778
CYTH4	0.00768461	0.07236	-0.312357
CTD-3088G3.8	0.00768895	0.07236	-0.726565
TCEB1	0.00770182	0.0723932	0.381378
IL31RA	0.00770817	0.0723932	-1.06098
CYB561	0.00772	0.0723932	-0.614771
TBCC	0.00772042	0.0723932	-0.304339
EXOSC4	0.00772202	0.0723932	0.675024
STAT3	0.0077349	0.0724585	-0.331315
RSRC2	0.00774624	0.0725093	0.274246
MPZL3	0.00779675	0.0729088	-0.383214
C2orf68	0.00780082	0.0729088	-0.302947
NAP1L5	0.00782252	0.0730559	0.543165
MFSD12	0.00783587	0.0731248	-0.360896
SURF4	0.00784195	0.0731258	0.385875
POLR2L	0.0078489	0.0731351	0.674267
ATP5L	0.00787034	0.0732791	0.403558
CSNK1G2	0.00788558	0.0733286	-0.298763
SOCS4	0.00788763	0.0733286	0.264612
PARP10	0.00790091	0.0733964	-0.480696
FOXN2	0.00793259	0.0736349	0.263855
IGLC3	0.00794627	0.073706	1.18189
B3GALT4	0.00795323	0.0737147	-0.300104
NOXRED1	0.00797694	0.073837	-0.48631
RP11-326C3.13	0.00797847	0.073837	0.774353
JMJD6	0.00798737	0.0738636	0.412034
CXCL5	0.00800834	0.073961	-1.04026
HLA-DPB1	0.00800997	0.073961	-0.459575
SETX	0.00803652	0.0741502	-0.336485
ALDH8A1	0.00806876	0.0743917	0.56259
SP100	0.00810721	0.07469	-0.308072
FADS2	0.00815221	0.0750481	0.856603
PAICS	0.00817087	0.0751634	0.387054
MED15	0.00821279	0.0754924	-0.496873
GIMAP1	0.00822861	0.0755324	-0.288197
KIAA0556	0.00822947	0.0755324	-0.412296
GSTK1	0.00828231	0.0759604	-0.456194
SPC25	0.00828907	0.0759655	0.681913
TSPO	0.00830352	0.0760412	0.430665
ODF3B	0.00832244	0.0761575	-0.674927
THUMPD2	0.00833451	0.076211	0.249575
ORC6	0.0083786	0.0765151	0.580277
PTPRE	0.00838331	0.0765151	-0.270434
MGAT1	0.0083865	0.0765151	0.374136
VPS11	0.00840201	0.0765996	-0.210192
WBP4	0.00843002	0.0767978	0.371889
LINC01420	0.00848526	0.0772436	0.573493
RTEL1P1	0.00852338	0.0774483	-0.7206
CALCOCO1	0.00852644	0.0774483	-0.358754
C3	0.00853448	0.0774483	0.933251
PSMA7	0.00853482	0.0774483	0.377903
LRRC42	0.00853935	0.0774483	0.368976
ELMO1	0.00856315	0.0776067	-0.302946
DIAPH2	0.00857803	0.0776841	0.308936
FANCL	0.00859783	0.0777908	0.290243
HMMR	0.00860676	0.0777908	0.748641
CEBPA	0.00860885	0.0777908	0.590754
NT5DC2	0.0086243	0.0778539	0.773427
GRIPAP1	0.00863224	0.0778539	-0.3158
RRAS	0.00863806	0.0778539	0.561344
GBP2	0.00864537	0.0778539	-0.353023
GGH	0.00864761	0.0778539	0.832271
SCIMP	0.00866137	0.0779206	-0.427964
CCDC34	0.00867829	0.0779971	0.536783
TIAM1	0.00868261	0.0779971	-0.402456
CASP4	0.00869076	0.0780131	-0.345565
CTD-2371O3.3	0.00870324	0.078015	0.50612
VDAC2	0.00870371	0.078015	0.252661
KIZ	0.00871898	0.07809	-0.270665
SMCHD1	0.00872482	0.07809	-0.446649
NDC1	0.00875048	0.0782064	0.253425
ENTPD7	0.00875562	0.0782064	0.598328
KBTBD7	0.00875697	0.0782064	0.453223
VPS26B	0.00880222	0.0785532	-0.272577
NDUFB4	0.00882361	0.0785704	0.382742
GABARAPL2	0.00882563	0.0785704	0.546233
GBF1	0.00882689	0.0785704	-0.335678
UBE2Q2	0.00882979	0.0785704	0.265799
RAB32	0.0088822	0.0787705	0.363538
UBE2V2	0.00888242	0.0787705	0.286576
GAS8	0.00888297	0.0787705	-0.668687
PACS1	0.00888316	0.0787705	-0.463179
CCDC159	0.00888442	0.0787705	-0.384086
RP5-906C1.1	0.00889908	0.0788434	-0.58806
PLK4	0.00891374	0.0788633	0.474856
MRPL22	0.00891419	0.0788633	0.395889
SLC25A24	0.00896784	0.0792806	0.358767
PHB2	0.00899165	0.0793588	0.385467
OSBPL5	0.00899676	0.0793588	-0.525838
HIVEP2	0.00900087	0.0793588	-0.391471
CTD-2547L24.3	0.00900769	0.0793588	-0.676128
C1RL	0.00900906	0.0793588	-0.389442
GSTZ1	0.00902041	0.0794017	-0.420689
TNFAIP8L2	0.00903457	0.0794692	-0.337858
CD52	0.00908457	0.0798517	0.684301
BST1	0.00912574	0.0801201	0.366108
ASAH1	0.00913329	0.0801201	0.376745
TMEM216	0.00913473	0.0801201	0.395591
G0S2	0.00915564	0.0801963	1.17845
LINC01504	0.0091565	0.0801963	-0.577692
NAA38	0.00916885	0.0802471	0.518682
TMEM229B	0.00918083	0.080261	-0.633416
AC058791.1	0.00918354	0.080261	-0.532827
TOR4A	0.0092013	0.0803032	0.419687
IGLV3-19	0.00920579	0.0803032	1.20269
MIATNB	0.00920803	0.0803032	-0.437308
ST7L	0.00923074	0.0804031	0.246743
RP11-159D12.2	0.00923261	0.0804031	-0.427194
PHF5A	0.00925234	0.0805177	0.42837
ANKRD32	0.00928032	0.0807039	0.270591
RPS21	0.00932158	0.0810052	0.716961
FCRL6	0.00934158	0.0811215	-0.713582
COX7A2L	0.00935797	0.0812062	0.338573
ANXA2	0.009386	0.0813919	0.30518
ECHDC2	0.0094271	0.08161	-0.351515
GFPT1	0.00942724	0.08161	0.325568
MLLT6	0.00943114	0.08161	-0.422201
DNASE1L1	0.00944082	0.0816361	0.379698
VPS54	0.00949486	0.0820257	0.227636
PRKD2	0.00949926	0.0820257	-0.410908
ADO	0.00953306	0.0822596	0.272976
SCRN1	0.00954881	0.0823102	-0.314272
SNX19	0.00955237	0.0823102	-0.235267
IVNS1ABP	0.00961526	0.0827939	0.342101
TTC33	0.00962378	0.0828091	0.31516
SRSF6	0.00964385	0.0829236	0.243714
OR51R1P	0.00968912	0.0832283	-0.860518
ARSG	0.00969698	0.0832283	-0.486695
CD44	0.00969966	0.0832283	0.366274
HLA-DRA	0.00974012	0.0834706	-0.590497
CTSH	0.00974404	0.0834706	0.504035
ZC3H3	0.00974834	0.0834706	-0.666697
COL18A1	0.00977684	0.0836028	-0.534707
RN7SL834P	0.00978243	0.0836028	-0.500509
NUDT16	0.00978926	0.0836028	-0.443953
BET1L	0.00979108	0.0836028	-0.543204
NUP50-AS1	0.00982892	0.0838675	-0.466693
C12orf29	0.00986666	0.084131	0.317321
RP11-802E16.3	0.00988455	0.0841628	-0.545187
RP11-658F2.8	0.00988618	0.0841628	-0.520093
HSH2D	0.0098966	0.0841628	-0.556845
HIST2H3A	0.00989803	0.0841628	0.809428
PLXDC2	0.00990474	0.0841628	-0.457161
LRRC25	0.00991329	0.0841771	0.535288
IKBKE	0.00993462	0.084273	-0.293054
PDLIM1	0.00994095	0.084273	0.497274
CDK4	0.00994522	0.084273	0.457323
LIG3	0.00996603	0.0843858	-0.241229
BARD1	0.00997231	0.0843858	0.308351
ETV3	0.00998774	0.0844581	-0.185239
GPSM2	0.0100013	0.0845142	0.449095
MAGT1	0.0100198	0.0846125	0.367358
SF3B6	0.0100367	0.0846453	0.525454
SPG7	0.0100375	0.0846453	-0.261005
CHEK1	0.0100644	0.0847751	0.441165
PRKCZ	0.0100667	0.0847751	-0.414336
TBC1D2B	0.0100836	0.0848586	-0.391475
STRBP	0.0100964	0.0849079	0.239846
RFWD3	0.0101037	0.0849109	-0.22556
RAB30	0.010113	0.0849312	0.401606
NPM1	0.0101307	0.0850218	0.428386
ABRACL	0.0101502	0.0851272	0.329059
HACL1	0.010164	0.0851842	-0.277105
HFE	0.0101905	0.0853464	-0.544309
FRMD3	0.0102199	0.0853464	-0.860158
ZNF641	0.0102279	0.0853464	-0.404209
SAMD8	0.0102419	0.0853464	0.205848
C5orf56	0.0102459	0.0853464	-0.647049
LRRC57	0.0102463	0.0853464	0.288245
ALKBH3	0.0102547	0.0853464	-0.293538
ZNF639	0.0102564	0.0853464	0.237708
RP11-44F14.1	0.0102568	0.0853464	-0.603434
RPS8	0.010263	0.0853464	0.43871
SEMA3C	0.0102654	0.0853464	-0.565872
RNF4	0.0102686	0.0853464	-0.216235
XRCC4	0.0102739	0.0853464	0.468985
TSHZ1	0.0103127	0.0855863	0.389647
IKBKB	0.0103167	0.0855863	-0.356582
PDLIM5	0.0103579	0.0858696	0.342694
KL	0.0103654	0.085874	0.659664
WDR1	0.010376	0.0859037	-0.242342
FOXK2	0.0103859	0.085927	0.227214
SCFD2	0.0104193	0.086128	-0.282962
LAMB3	0.0104309	0.086128	0.924793
LMTK2	0.0104312	0.086128	-0.412477
SBDSP1	0.0104601	0.0862036	0.33431
HCLS1	0.0104639	0.0862036	-0.318352
HIST1H4C	0.010468	0.0862036	0.663686
ZBTB26	0.0104685	0.0862036	0.271174
MMP24-AS1	0.0104885	0.0863104	-0.388891
GBE1	0.0105171	0.0864402	0.35656
CCNB1	0.0105184	0.0864402	0.543052
SLC2A5	0.0105299	0.0864761	0.798738
ZMYM5	0.010567	0.0867229	0.260476
APP	0.0105853	0.0868153	0.39587
DMC1	0.0105976	0.0868574	0.638824
CC2D1B	0.0106069	0.0868762	-0.291075
SNX9	0.0106168	0.0868989	0.391862
GAPDH	0.0106317	0.0868999	0.395065
AP5Z1	0.0106329	0.0868999	-0.394938
PHF20L1	0.0106382	0.0868999	0.253311
TIMM50	0.0106489	0.0869296	0.342913
COQ5	0.0106702	0.0869379	0.41182
ATP13A1	0.0106725	0.0869379	-0.365407
CMSS1	0.0106734	0.0869379	0.344255
RERE	0.0106787	0.0869379	-0.459807
MAPKBP1	0.0106854	0.0869379	-0.449817
AGAP3	0.0107394	0.087319	0.519321
HLCS	0.0107487	0.0873364	-0.351742
DOPEY1	0.0107776	0.0874969	-0.234584
UBTD2	0.0107942	0.0874969	0.344077
CDKL1	0.0108008	0.0874969	-0.496211
SLC39A6	0.0108127	0.0874969	0.317937
VPS52	0.0108205	0.0874969	-0.252434
NDEL1	0.0108211	0.0874969	-0.302582
PBXIP1	0.0108233	0.0874969	-0.403252
S100B	0.0108255	0.0874969	-1.24205
GMFB	0.0108405	0.0875604	0.308466
CD9	0.0108542	0.0876131	0.643872
TLR4	0.0108752	0.0876846	-0.307118
RP11-230F18.6	0.0108774	0.0876846	0.717199
IGLV2-14	0.0108863	0.087699	1.11387
ALMS1-IT1	0.0109139	0.087863	0.391997
RPL35A	0.010981	0.0883233	0.602107
SKA1	0.0109874	0.0883233	0.634499
SLC50A1	0.0109927	0.0883233	0.366779
SCARF1	0.011	0.0883242	-0.660904
RMI2	0.0110268	0.0884424	-0.854296
CREG1	0.0110291	0.0884424	0.383035
ZFP1	0.0110898	0.0888501	0.379486
HLA-A	0.0110945	0.0888501	-0.518571
AKNA	0.0111192	0.0889896	-0.459303
KLHL28	0.0111693	0.0893322	0.199992
SRSF5	0.0111868	0.0893655	-0.281529
ADORA2B	0.011188	0.0893655	0.634812
NSUN7	0.0112081	0.0894679	0.594206
ACADSB	0.011239	0.0896557	-0.371602
RPLP2	0.011281	0.0899325	0.414391
ACAP2-IT1	0.0112937	0.0899749	0.473135
KLF9	0.011321	0.0901338	0.359788
FAU	0.0113474	0.0902128	0.471674
CXCL8	0.0113503	0.0902128	1.28653
PA2G4	0.011353	0.0902128	0.471031
TSPAN33	0.0113836	0.0903761	0.487776
LOXL2	0.0113883	0.0903761	-0.526496
GIT2	0.011402	0.0903761	-0.335861
ZNF829	0.0114077	0.0903761	0.329876
RMND5B	0.0114104	0.0903761	-0.292442
ELP3	0.0114415	0.0905639	-0.221491
RP11-171I2.2	0.0114541	0.0906049	-0.484388
ARRDC3	0.011473	0.0906955	-0.519394
ATF4	0.0114818	0.0907067	0.329093
CMAHP	0.0114958	0.0907497	-0.529673
TNF	0.011502	0.0907497	0.815963
KIF27	0.0115141	0.0907561	-0.581903
CRACR2A	0.0115182	0.0907561	-0.341722
MYB	0.0115251	0.0907561	0.514249
INO80E	0.0115359	0.0907835	-0.288917
CTD-2353F22.1	0.0115539	0.0908664	-0.395849
ASS1P1	0.0115984	0.0911576	-0.653098
DEFA4	0.0116069	0.0911615	1.72215
UNK	0.0116137	0.0911615	-0.370777
IKZF4	0.011656	0.0914343	-0.92766
COTL1	0.0116799	0.0915361	-0.310454
DLEU1	0.0116839	0.0915361	-0.494589
MEAF6	0.0117173	0.0915826	0.264409
ITPR2	0.0117187	0.0915826	-0.269557
NDUFA5	0.0117209	0.0915826	0.467729
ZBTB37	0.0117318	0.0915826	-0.249234
MCM10	0.0117379	0.0915826	0.517984
SNX3	0.0117446	0.0915826	0.386923
B3GNT8	0.0117553	0.0915826	0.513015
TBXAS1	0.011756	0.0915826	-0.296197
CXorf21	0.0117571	0.0915826	-0.446745
FAM120B	0.0117704	0.0916281	-0.288662
HOOK3	0.0117983	0.0917873	0.255827
EFHD2	0.0118241	0.0918614	-0.311969
ZNRD1	0.0118326	0.0918614	0.396516
ATG5	0.0118344	0.0918614	0.286354
FAM129A	0.0118379	0.0918614	-0.336374
STMN1	0.0118526	0.0919174	0.54277
CCNG1	0.0118814	0.0920826	0.240305
C14orf1	0.0118954	0.0921327	0.481212
MELK	0.0119179	0.0922231	0.448074
ARL6IP1	0.0119221	0.0922231	0.33424
RP11-483E17.1	0.0119299	0.0922252	-0.77916
ZRANB2	0.0119612	0.092409	0.267847
CALCOCO2	0.0120039	0.0926806	-0.398003
PAN2	0.012016	0.0927153	-0.306802
FAM72A	0.0120863	0.0931991	0.483946
PNPLA1	0.012126	0.0934266	0.530304
RP5-857K21.6	0.0121377	0.0934266	-2.12411
EXOC6B	0.0121387	0.0934266	0.277954
CPA3	0.0121617	0.0935448	-1.0045
TUBG1	0.0122027	0.0937924	0.443713
RDH13	0.0122142	0.0937924	-0.408509
GCSAM	0.0122173	0.0937924	0.488636
PANK4	0.0122255	0.0937924	-0.297304
SLC37A2	0.0122321	0.0937924	-0.43107
RP11-734K2.4	0.0122482	0.0938566	-0.371694
ARL4A	0.0122572	0.0938586	0.648834
SCYL3	0.0122667	0.0938586	-0.411173
LRMP	0.0122786	0.0938586	-0.306084
DNAJB12	0.0122791	0.0938586	-0.285626
PELO	0.0123236	0.0941401	0.350587
ST6GALNAC3	0.0123758	0.0944799	0.472682
HIST1H3I	0.0123911	0.0945378	0.523919
ZBTB49	0.0124047	0.0945743	-0.233717
INSIG2	0.0124113	0.0945743	0.288722
ALKBH8	0.0124223	0.0945995	-0.298357
HVCN1	0.0124352	0.0946388	-0.411039
BEND2	0.0124639	0.0947553	-0.841807
POLR2M	0.012466	0.0947553	0.244063
RP11-44K6.2	0.0124861	0.0948497	-1.23214
OARD1	0.0125261	0.0950773	-0.272051
RBCK1	0.0125321	0.0950773	-0.414331
RAB6A	0.0125508	0.0950773	0.265353
ANXA5	0.0125545	0.0950773	0.345886
ZNF654	0.0125549	0.0950773	0.290487
ZNF350	0.0125927	0.0952596	-0.263726
RBP7	0.0125945	0.0952596	-0.776307
NUP133	0.0126199	0.0953928	-0.200996
SKIV2L	0.0126855	0.0958295	-0.30323
JARID2	0.0127079	0.0959399	-0.317844
PRRC1	0.0127628	0.0962951	0.297402
ARRDC5	0.0127932	0.096465	-0.54783
ALOX5AP	0.0128139	0.0965222	0.493797
CMPK2	0.0128166	0.0965222	-1.01629
KIAA1586	0.0128289	0.0965338	0.482101
MRPS21	0.0128348	0.0965338	0.384582
CTC-479C5.12	0.0128418	0.0965338	-0.432356
ADPGK	0.0128835	0.0967885	-0.226983
RNF144A	0.0128944	0.0968105	-0.518712
AFF1	0.0129619	0.0972575	-0.482743
TMEM106C	0.0129933	0.0974341	0.389144
MATK	0.0130419	0.0977385	-0.448143
C9orf91	0.0130545	0.0977729	-0.540012
PDE7B	0.013087	0.0979566	0.51179
STAG3L5P	0.0131222	0.09816	-0.412383
PPP4R2	0.0132521	0.0989262	0.354001
BUB1B	0.0132529	0.0989262	0.568035
RNU1-100P	0.0132563	0.0989262	-0.633259
CCDC88C	0.0132593	0.0989262	-0.26608
SLA2	0.0132734	0.0989262	0.490247
AGO4	0.0132811	0.0989262	-0.274969
RPP30	0.0132952	0.0989262	0.250614
PDCD10	0.0133098	0.0989262	0.394188
SLC2A3	0.0133145	0.0989262	0.436737
ERG	0.0133197	0.0989262	0.814117
CA8	0.0133204	0.0989262	0.563759
AP001257.1	0.0133215	0.0989262	0.899497
ASPHD2	0.0133484	0.0989331	-0.528154
ARFRP1	0.0133519	0.0989331	-0.317211
RP11-705C15.2	0.0133563	0.0989331	-0.395577
AATBC	0.0133595	0.0989331	-0.848149
SLC46A2	0.013369	0.0989331	-0.696123
XAF1	0.0133709	0.0989331	-0.65718
GANC	0.013401	0.0990473	-0.344201
CDC37L1	0.0134025	0.0990473	0.272291
C4orf46	0.0134434	0.0992406	0.451398
TIMM8B	0.0134525	0.0992406	0.546365
ST6GALNAC2	0.0134529	0.0992406	-0.513187
FZD3	0.0135057	0.0995703	0.658285
LTB	0.013522	0.0996303	-0.375296
ORMDL2	0.013549	0.0997693	0.285478
C11orf57	0.0135667	0.0998243	0.275362
PIBF1	0.0135728	0.0998243	0.266676
UPP1	0.0135988	0.0999558	0.3201
PYCARD	0.0136258	0.100094	-0.381796
KMT2B	0.0136419	0.100118	-0.566084
VAV1	0.0136454	0.100118	-0.288933
MIER3	0.0136696	0.100236	0.272663
DTHD1	0.0136829	0.100245	0.505579
RCC1	0.0136872	0.100245	0.396066
CCL2	0.0136978	0.100262	1.72646
GRIN3A	0.0137111	0.100268	-1.19011
PSMG3	0.013726	0.100268	0.53047
RP11-580I16.2	0.0137286	0.100268	-0.548262
TMPRSS9	0.0137313	0.100268	-1.23088
AP1G2	0.0137489	0.100336	-0.287731
TOM1L2	0.0137851	0.100541	-0.394368
NAA50	0.0138084	0.100637	0.221837
ZDBF2	0.0138275	0.100637	0.371752
ATP6V0E1	0.0138309	0.100637	0.266687
ARMCX2	0.0138355	0.100637	0.474115
LINC00402	0.0138393	0.100637	-0.606534
KLRB1	0.0139131	0.101113	-0.501884
AGPAT2	0.0139526	0.101296	0.453847
ABCA1	0.0139547	0.101296	-0.608006
ZSCAN26	0.0140072	0.101616	-0.295871
C9orf89	0.0140184	0.101637	0.489277
CENPW	0.0140452	0.101772	0.612603
DGKZ	0.0140628	0.101839	-0.442852
CDKN2AIPNL	0.0141286	0.102255	0.382409
NUP160	0.0141646	0.102455	-0.246505
METTL21A	0.0141905	0.102582	0.536951
TPD52	0.014208	0.102639	0.351277
RPL8	0.0142199	0.102639	0.351666
CD82	0.0142236	0.102639	0.517378
FLJ46284	0.0142448	0.10267	0.568828
RNF103	0.0142499	0.10267	0.242194
EPSTI1	0.014253	0.10267	-0.583279
AMPD3	0.014277	0.102764	0.423733
MAP9	0.0142828	0.102764	0.335408
TYW5	0.0142922	0.102772	0.246027
RPTOR	0.0143038	0.102794	-0.379641
LSM5	0.0143144	0.102811	0.528944
CAMSAP2	0.0143328	0.102882	0.434361
GCC1	0.0143448	0.102908	-0.287339
BTBD9	0.0143588	0.102931	-0.289253
AC002117.1	0.0143783	0.102931	-0.354054
GNB5	0.0143791	0.102931	0.285947
SHARPIN	0.0143816	0.102931	-0.527482
MYO7A	0.0143921	0.102946	0.740274
PLA2G6	0.0144042	0.102959	-0.40396
LIMK1	0.0144108	0.102959	-0.464258
STAM	0.0144305	0.10304	0.227766
SELL	0.0144502	0.103093	-0.324032
SETDB1	0.0144624	0.103093	-0.335651
MND1	0.0144631	0.103093	0.78092
ERCC6L	0.0144863	0.103198	0.438724
MAD2L2	0.0145151	0.103343	0.394674
IDH2	0.0145312	0.103361	-0.354268
PFDN5	0.0145366	0.103361	0.547031
SEMA7A	0.0145429	0.103361	0.39675
CTSO	0.0145651	0.103391	-0.730099
SNX4	0.0145661	0.103391	0.412634
FANCE	0.0145791	0.103391	0.457273
LRRC4	0.0145809	0.103391	-0.46415
RAN	0.0146009	0.103473	0.37693
TRIM5	0.0146358	0.103616	-0.361009
RALB	0.014638	0.103616	-0.288705
RASSF1	0.0146551	0.103619	-0.303167
ARHGAP26	0.0146626	0.103619	-0.359422
CHP1	0.0146915	0.103619	0.381061
BTD	0.0146928	0.103619	-0.322529
MYO5A	0.0147005	0.103619	-0.35307
DR1	0.0147044	0.103619	0.209772
RPL7	0.0147058	0.103619	0.654646
MDN1	0.014706	0.103619	-0.311245
ORM1	0.0147323	0.103744	1.22861
MPLKIP	0.0147696	0.103893	0.213862
EI24	0.0147703	0.103893	0.282285
SERP1	0.0147857	0.103941	0.340111
TAGLN	0.0148382	0.104251	-0.921792
VAT1	0.0148858	0.104467	0.549862
DNTTIP2	0.0148861	0.104467	0.439473
PCYT1B	0.0149028	0.104525	1.00528
TPM1	0.0150046	0.105178	0.617137
ACP6	0.0150221	0.105241	0.526201
ANXA2R	0.015036	0.105278	-0.453157
PDSS1	0.0150505	0.105319	0.510181
GOLGA2	0.0151254	0.105783	-0.326562
ADAMDEC1	0.0152084	0.106303	0.760502
AL023806.1	0.0152453	0.106477	0.386753
ABCF3	0.0152507	0.106477	-0.241496
TMEM194A	0.0152793	0.106537	0.246119
KIAA1524	0.0152793	0.106537	0.390221
CD3D	0.0152854	0.106537	0.379973
PLAGL1	0.0153569	0.106974	-0.544517
TOLLIP	0.015371	0.107012	0.29083
DFFA	0.0154336	0.107387	0.275678
SLC36A4	0.015458	0.107419	0.403068
FAM63B	0.0154611	0.107419	0.280955
ZNF652	0.0154655	0.107419	-0.446051
ELL2	0.0154732	0.107419	0.455115
RP1-111C20.4	0.0154974	0.107486	-0.543398
SMG1P1	0.0155005	0.107486	-0.489861
DPY19L1	0.0155218	0.107572	0.290996
POLQ	0.0155488	0.107699	0.415232
AKT3	0.0156292	0.108195	0.285646
ING3	0.0156547	0.10831	-0.214298
TNFAIP2	0.0157159	0.108608	-0.467849
EPM2AIP1	0.0157169	0.108608	0.280676
KIF15	0.0157244	0.108608	0.458892
WWP2	0.0157442	0.108637	-0.288121
E2F2	0.0157463	0.108637	0.514184
SIGLEC10	0.0157712	0.108748	0.529642
TSGA10	0.0157895	0.108813	0.365488
PPP2R5A	0.0158121	0.108907	0.300993
TCN2	0.0158603	0.109178	-0.699472
UGDH	0.0158711	0.109191	0.379554
ANKRD44-IT1	0.0158843	0.10922	-0.645301
PEX14	0.0159759	0.109775	-0.366397
DECR1	0.0159829	0.109775	-0.231188
STARD3NL	0.0160284	0.110026	0.331876
OSBPL2	0.0160376	0.110027	-0.250365
HCP5	0.0160465	0.110027	-0.323097
PDS5A	0.0160844	0.110225	0.1908
COPRS	0.0161625	0.110665	0.439569
UTS2	0.0161676	0.110665	1.91646
KDELR2	0.0161758	0.110665	0.302594
COG1	0.0161984	0.11075	-0.224557
PRMT7	0.0162109	0.11075	-0.237166
DOLPP1	0.0162152	0.11075	0.454706
AP1S1	0.0162317	0.1108	0.445476
LIG4	0.0162541	0.110872	0.356524
ANKS1A	0.0162603	0.110872	-0.280584
ANKRD50	0.0162796	0.110942	0.308031
NAA15	0.0162924	0.110968	0.227977
RP11-357P18.2	0.0163647	0.111383	0.488825
MTHFD2	0.0163716	0.111383	0.386132
ASPM	0.0164065	0.111509	0.440289
GIMAP5	0.0164222	0.111509	-0.252715
MCU	0.0164259	0.111509	0.347837
NAA30	0.0164265	0.111509	0.220959
PFDN6	0.0164981	0.111933	0.470451
RPLP0	0.0165283	0.112076	0.363628
ACOT13	0.016554	0.112188	0.350197
CEBPZOS	0.016572	0.112248	0.281048
DET1	0.016619	0.112474	-0.402458
CKAP2L	0.0166237	0.112474	0.539731
GSN	0.016638	0.112509	-0.350099
PMEPA1	0.0166822	0.112745	0.484458
CASC5	0.0167227	0.112908	0.445781
EPB41L3	0.0167248	0.112908	-0.342306
PPT1	0.0167476	0.11299	-0.377934
NUCB2	0.0167553	0.11299	0.356489
CTNS	0.0168331	0.113452	0.325868
GALNT1	0.0168441	0.113464	0.325012
SSX2IP	0.0168611	0.113516	0.320188
ZZEF1	0.0168767	0.113558	-0.308372
PPP1R16B	0.0168873	0.113568	0.263003
SLC19A1	0.0169183	0.113705	-0.403162
FGFR1OP	0.0169263	0.113705	-0.306039
ECT2	0.0169642	0.113897	0.325369
ATF6B	0.0169892	0.113979	-0.37493
SNX29	0.016995	0.113979	-0.273837
RANBP6	0.0170166	0.114061	0.285063
EYA3	0.0170503	0.114192	0.243578
EMB	0.01706	0.114192	0.411036
CTD-2561J22.2	0.017064	0.114192	0.551869
CBX3	0.0170874	0.114231	0.348106
C8orf59	0.0170885	0.114231	0.374951
PHYH	0.0171346	0.114435	0.388626
UBE2C	0.0171377	0.114435	0.580341
HOPX	0.01717	0.114588	0.573455
HIBADH	0.0172008	0.114731	0.29538
HEMK1	0.017235	0.114897	-0.348796
PRKCQ	0.0172681	0.11505	-0.259436
ZNF83	0.0172854	0.11505	0.335309
BAHD1	0.0172861	0.11505	-0.277377
SPTSSA	0.017319	0.115206	0.376754
DNAH7	0.0173483	0.115287	-0.635099
RAD51D	0.01735	0.115287	-0.266789
ATP6V1F	0.0173948	0.115522	0.495972
TAF8	0.0174143	0.115524	-0.263621
HIST1H2BM	0.0174181	0.115524	0.578171
PDZD11	0.0174234	0.115524	0.322185
C11orf73	0.0174509	0.115644	0.304224
RALY	0.0174643	0.115656	-0.383118
AKR1B1	0.0174716	0.115656	0.373188
PRUNE2	0.0175038	0.115807	1.12577
LMF2	0.0175262	0.11581	-0.373511
MRPL39	0.0175297	0.11581	0.387165
DDX60	0.0175353	0.11581	-0.733119
DTL	0.0175496	0.11581	0.400007
HPGD	0.0175516	0.11581	0.750707
SH3RF1	0.0175894	0.115997	0.593726
LYSMD3	0.0176194	0.116133	0.283566
USP25	0.0176336	0.116148	-0.340239
OAS1	0.0176639	0.116148	-0.908834
NQO2	0.0176674	0.116148	0.403136
AMZ2P1	0.0176713	0.116148	-0.487329
BLNK	0.0176789	0.116148	0.311425
REEP3	0.0176794	0.116148	0.213412
LINC01588	0.0176911	0.116148	-0.438103
MAFB	0.0176976	0.116148	0.430396
RP5-1112D6.8	0.0177084	0.116149	-0.515196
ANAPC10	0.0177166	0.116149	0.297117
EIF3B	0.0178534	0.116968	-0.355886
IRF3	0.0178664	0.116968	-0.278679
PTPN7	0.0178703	0.116968	0.390419
FAM177A1	0.0179107	0.117148	0.318697
KHDRBS1	0.0179169	0.117148	0.2389
EEPD1	0.0179744	0.117462	-0.497602
MAN2B1	0.018	0.117566	-0.363883
DDX5	0.0180294	0.117695	-0.223448
ILF2	0.0180587	0.117824	0.325296
SMPD2	0.018086	0.117939	0.38589
OPLAH	0.0181089	0.117946	0.686297
MR1	0.0181116	0.117946	-0.371753
STK4	0.0181239	0.117946	-0.200323
RP11-353N4.6	0.0181255	0.117946	-0.596309
VPS9D1	0.0181402	0.117979	-0.406107
SUN2	0.0181615	0.118054	-0.289452
PTPN6	0.0181747	0.118078	-0.329767
GAB3	0.0182308	0.118379	-0.32821
IFIT1	0.0182407	0.118381	-1.54979
PDGFRB	0.0182633	0.118416	-0.701685
FAM26F	0.0182654	0.118416	-1.16069
RARS	0.018337	0.118817	0.284181
DAK	0.0183587	0.118841	-0.393616
C8orf88	0.01836	0.118841	0.690424
RP5-1085F17.3	0.0183765	0.118885	0.382553
FADS1	0.0183927	0.118927	0.56132
MGST1	0.0184239	0.119065	0.489933
LINC00667	0.018512	0.119572	-0.290201
ITPK1	0.018528	0.119612	-0.432595
ZNF548	0.0185593	0.119727	-0.295623
LRRN3	0.0185654	0.119727	-0.562063
RP13-452N2.1	0.0186363	0.120121	0.731169
NSDHL	0.0187185	0.120588	0.435895
CTC-429P9.3	0.018794	0.12101	-0.400129
SMCO4	0.018821	0.121121	-0.708028
ZNF862	0.0188534	0.121266	-0.368407
DDX50P1	0.0188665	0.121286	0.365875
CLIP2	0.018907	0.121407	0.405397
RP11-296O14.3	0.0189078	0.121407	-0.441945
RP11-213G2.3	0.018915	0.121407	0.356837
PGAM5	0.0189522	0.121556	0.372964
PSMC3IP	0.0189582	0.121556	0.429294
GMNN	0.0189839	0.121575	0.417423
LIN7C	0.0189885	0.121575	0.253433
M6PR	0.0189908	0.121575	0.28963
ZNF607	0.0190181	0.121658	0.36233
TSC22D2	0.0190237	0.121658	0.330556
DENND2C	0.0190436	0.121679	0.635383
JMY	0.0190468	0.121679	0.299485
SIAH1	0.0190767	0.121806	0.240183
PHLPP1	0.0191078	0.121942	0.490307
POP1	0.0191264	0.121997	0.253733
HSD11B1	0.0191446	0.122014	1.40081
MRPS22	0.019149	0.122014	0.268341
ENKUR	0.019176	0.122086	-0.857457
RP11-426D19.1	0.0191803	0.122086	-0.560004
SAR1B	0.0191967	0.122127	0.234424
HNRNPC	0.0192463	0.122379	0.247667
SIKE1	0.0192774	0.122513	0.183972
AURKA	0.0192901	0.122531	0.437205
EXOC5	0.0193039	0.122555	0.186003
SPRYD7	0.0193584	0.122837	0.315212
ACVRL1	0.0193943	0.123001	0.716546
FAM111A	0.0194304	0.123133	-0.445884
MYLIP	0.0194351	0.123133	-0.372914
SMIM20	0.0194595	0.123223	0.465937
KCTD9P1	0.0194744	0.123254	-0.881279
CSRNP1	0.0195106	0.123374	-0.334687
IGLV6-57	0.0195147	0.123374	1.26489
KLRF1	0.0195287	0.123374	-0.632969
NSD1	0.0195336	0.123374	-0.233207
GTPBP1	0.0195905	0.123669	-0.299519
TAS2R4	0.0196656	0.123963	-0.638314
MAEA	0.0196719	0.123963	-0.219637
EMC9	0.0196734	0.123963	0.494171
NMT2	0.0196774	0.123963	-0.302757
CHST11	0.0197106	0.124108	-0.28339
NRAS	0.0197616	0.124365	0.266283
RNASE2	0.0197986	0.124534	0.720945
PGM2L1	0.0198575	0.124841	0.410247
ENY2	0.0198806	0.124921	0.380274
SART1	0.0199053	0.125013	-0.337268
GPKOW	0.0199758	0.125391	-0.286334
APOL6	0.0199976	0.125464	-0.468343
XRCC6BP1	0.0200697	0.125851	0.377284
LSM3	0.0200987	0.125859	0.564448
NLRC5	0.020099	0.125859	-0.35533
CCL3L3	0.0201017	0.125859	1.13354
TPX2	0.0201212	0.125917	0.461429
ITPKB-IT1	0.0201416	0.12598	-0.553151
IFT20	0.0201638	0.126055	0.466099
SPTBN1	0.020189	0.126148	-0.282728
BCAS2	0.0202206	0.126281	0.276073
RASSF4	0.0202427	0.126355	-0.306656
DNAH6	0.0202643	0.126425	-0.45914
R3HCC1L	0.0202923	0.126493	-0.220608
PITPNA	0.0202997	0.126493	-0.368839
HSPA14	0.0203116	0.126493	0.1698
HEATR1	0.0203164	0.126493	-0.22531
RPL11	0.0203553	0.126667	0.505918
HSD17B11	0.0203651	0.126667	-0.382668
UNC13B	0.0203856	0.12673	0.632515
LINC01232	0.0205807	0.127792	-0.64757
KB-1460A1.5	0.0206038	0.127792	0.535253
RBM5	0.0206051	0.127792	-0.190093
MTR	0.0206073	0.127792	-0.204495
DPY30	0.0206085	0.127792	0.385275
TAF15	0.020627	0.127842	-0.281321
TRAPPC5	0.0206831	0.128124	0.463789
RPL12	0.0207441	0.12842	0.337269
TBC1D13	0.0207517	0.12842	-0.358504
OR7E38P	0.0208043	0.12868	0.538418
ZNF839	0.0208455	0.128802	-0.284445
DOCK5	0.0208458	0.128802	-0.413686
ARHGAP5	0.0208574	0.128802	0.329979
IFT172	0.0208661	0.128802	-0.296315
NBPF11	0.0209167	0.12905	-0.319226
LINC00862	0.0209417	0.129139	0.646128
MRVI1-AS1	0.0209667	0.129193	0.663039
RP11-159D12.8	0.0209715	0.129193	0.413604
CUTA	0.0210206	0.12943	0.431191
MFHAS1	0.0210535	0.129567	0.494288
MRPL13	0.0211137	0.129873	0.411945
ARHGEF9	0.0211804	0.130217	-0.333735
ISG20	0.0211955	0.130245	-0.357118
C11orf58	0.0212219	0.130342	0.276695
RPS16	0.0212923	0.130643	0.598044
LGR4	0.0212923	0.130643	0.609762
CTC-459F4.1	0.0213158	0.130678	0.485481
ZNF251	0.0213192	0.130678	-0.279033
[truncated: 10,254 more rows]
