# Supplementary material for: Comparative transcriptomic analysis reveals translationally relevant processes in mouse models of malaria
Source: eLife. 2022 Jan 10;11:e70763. doi: 10.7554/eLife.70763 (PMC8747512; doi:10.7554/eLife.70763)
Supplement: Supplementary file 15. [file elife-70763-supp15.xlsx]

## Sheet: Key
Supplementary File 15 Lee et al 2018 Differential Expression Analysis without adjustment
Table Column Names Key
Description: The results of the differential expression Analysis of the Lee et al., 2018 human RNASeq dataset. logFC values are given relative to the more severe phenotype. The statistically significantly differentially expressed genes before FDR correction are given only.
Gene	Gene symbol
Pvalue	p-values
FDR	false discovery rate corrected p-values
logFC	log fold-change
Tab Names Key
CM	Cerebral Malaria
UM	Uncomplicated Malaria
HL	Hyperlactatemia
CH	Cerebral Malaria + Hyperlactatemia

## Sheet: HL-UM
Gene	logFC	logCPM	LR	PValue	FDR
OLFM4	4.45939	7.97506	43.9925	3.29629e-11	4.03894e-07
MMP8	3.35547	9.77778	26.1691	3.12792e-07	0.00191632
FAM47E-STBD1	0.970146	3.36744	21.8806	2.90155e-06	0.0118509
CA12	2.26234	1.87985	18.3916	1.7985e-05	0.0493169
ART4	1.8271	1.12473	17.7073	2.57642e-05	0.0493169
LCN2	2.42263	4.05126	17.3989	3.03009e-05	0.0493169
TFDP1	1.0051	6.23501	17.1935	3.37583e-05	0.0493169
LTF	2.22009	5.48612	17.0702	3.6023e-05	0.0493169
CA2	1.53955	4.12436	17.0596	3.62239e-05	0.0493169
SAR1B	0.441484	6.11012	16.2428	5.57198e-05	0.0682735
RP11-77A13.1	2.91664	1.01261	15.7704	7.15117e-05	0.0796576
PGM2L1	0.868618	4.98022	15.5136	8.19122e-05	0.0836392
SPP1	2.33181	1.61298	15.306	9.14256e-05	0.0861721

## Sheet: CM-UM
Gene	logFC	logCPM	LR	PValue	FDR
DEFA3	4.17927	4.87655	27.0423	1.99052e-07	0.00243898
DEFA4	3.64646	3.74423	21.9082	2.86015e-06	0.0134909
ZNF443	1.43024	3.1451	21.6319	3.30309e-06	0.0134909
MS4A3	2.81183	4.66944	20.6483	5.51874e-06	0.0169053
ELANE	3.67516	1.66259	19.705	9.03625e-06	0.0221442
CEACAM6	2.51655	2.55412	19.0584	1.26779e-05	0.0258903
LINC00671	1.94063	2.21394	18.0657	2.13407e-05	0.0373554
CTSG	3.26957	3.75687	16.9719	3.79364e-05	0.0581044
SLC44A1	0.766258	6.55022	16.342	5.288e-05	0.0719932

## Sheet: CH-UM
Gene	logFC	logCPM	LR	PValue	FDR
OLFM4	4.68361	7.97506	52.7457	3.79656e-13	4.65193e-09
HSPE1	1.93383	2.58956	35.1119	3.11295e-09	1.90715e-05
MMP8	3.59307	9.77778	33.7844	6.15721e-09	2.51481e-05
BEND4	1.37885	4.35643	30.3074	3.6872e-08	0.000112948
RP11-452H21.1	2.25253	2.07033	29.8066	4.77371e-08	0.000116984
UBE2A	0.648208	5.05077	29.387	5.92725e-08	0.000121044
SPP1	2.96527	1.61298	28.9262	7.51879e-08	0.000131611
SLC7A11	1.275	3.39547	28.3979	9.87723e-08	0.000150699
IGLV4-3	3.66925	2.43432	28.0803	1.16382e-07	0.000150699
FAM47E-STBD1	0.984353	3.36744	27.9735	1.2299e-07	0.000150699
MME	-2.27496	7.45772	25.344	4.79639e-07	0.000534274
BAG3	2.12788	2.41393	24.847	6.20643e-07	0.000590754
LINC01480	1.44435	2.73611	24.7298	6.5957e-07	0.000590754
SYTL1	-0.600891	4.56699	24.6853	6.74982e-07	0.000590754
KIAA1324	-2.14048	3.56268	24.2726	8.36183e-07	0.000641256
FRY	-1.23457	7.26395	24.2699	8.37354e-07	0.000641256
IL10	1.90974	4.0184	24.035	9.46027e-07	0.000681863
PCOLCE2	2.05815	1.4228	23.5991	1.18643e-06	0.000703712
HDC	-2.4358	0.869298	23.5554	1.21367e-06	0.000703712
SERPINH1	2.14486	2.02043	23.5465	1.21931e-06	0.000703712
HSPA1B	2.77464	6.17659	23.3723	1.33488e-06	0.000703712
HSPH1	2.28539	8.90151	23.3091	1.37944e-06	0.000703712
FGL2	-1.34267	9.90934	23.3045	1.38274e-06	0.000703712
IGKV3D-20	2.26728	1.51585	23.236	1.43292e-06	0.000703712
STRAP	0.525354	4.81924	23.2321	1.43579e-06	0.000703712
YWHAH	0.779788	4.24479	22.8019	1.79587e-06	0.00082199
MIR155HG	1.39644	2.31231	22.7187	1.87533e-06	0.00082199
MYCL	-1.74391	1.49108	22.6617	1.9318e-06	0.00082199
EID3	0.654869	3.286	22.639	1.95477e-06	0.00082199
SLC41A2	0.906915	2.4636	22.583	2.01254e-06	0.00082199
MRPS6	1.15543	4.17303	22.4877	2.11489e-06	0.000835926
DNAJB1	1.98298	7.02579	22.2003	2.45641e-06	0.000940577
CLEC7A	-1.35256	7.75323	21.6101	3.3408e-06	0.00122646
CEACAM8	2.31488	4.6702	21.5333	3.47733e-06	0.00122646
EMP1	1.7257	3.69312	21.5008	3.53689e-06	0.00122646
FSD1L	0.713695	4.79189	21.4619	3.6093e-06	0.00122646
HSPD1	1.31527	7.67629	21.4125	3.70349e-06	0.00122646
CCNA1	2.27886	1.6428	21.1519	4.24281e-06	0.00136808
CA12	2.20645	1.87985	20.8348	5.00649e-06	0.00157294
CASS4	-1.01099	3.02334	20.5007	5.96091e-06	0.00182598
SCD	1.33719	4.40803	20.3338	6.50411e-06	0.00194378
PARD6G-AS1	1.343	1.66675	20.2403	6.82999e-06	0.00199257
MSMO1	0.739909	5.09136	20.1642	7.10699e-06	0.00199829
SLC5A3	1.12825	7.76285	20.1458	7.17577e-06	0.00199829
LCN2	2.37301	4.05126	19.7363	8.88953e-06	0.00237001
P4HA1	0.940413	7.23013	19.7346	8.89743e-06	0.00237001
CKS2	1.31916	4.38918	19.6244	9.42593e-06	0.00245736
DARS-AS1	0.902997	2.76575	19.5196	9.95749e-06	0.00249846
ILKAP	0.460958	4.51932	19.5131	9.99138e-06	0.00249846
HLA-F	-0.669728	7.11402	19.4201	1.04899e-05	0.00257066
MMACHC	0.693183	1.74367	19.2102	1.17088e-05	0.00281309
RETN	1.89812	4.81277	19.0818	1.25235e-05	0.00295097
AK5	-1.20377	2.16222	18.9233	1.36083e-05	0.00314608
TSPYL2	0.833804	3.82259	18.8717	1.39813e-05	0.00317247
IGLV7-43	2.45468	2.30324	18.7215	1.51265e-05	0.0033699
IGLV7-46	1.71141	1.96871	18.5878	1.62252e-05	0.00355014
DNAJB4	1.12273	5.11872	18.5105	1.68974e-05	0.00363234
STAC3	-0.865676	2.30356	18.3493	1.83891e-05	0.00388485
SNRNP27	0.770114	4.62798	18.3141	1.87313e-05	0.00389008
CAMK2G	-0.756165	4.86559	18.2063	1.98219e-05	0.00404796
PSMB8-AS1	-0.497029	5.69366	18.1328	2.06019e-05	0.00407251
VEGFA	1.15274	3.26273	18.1243	2.06944e-05	0.00407251
RPGRIP1	-1.37143	1.461	18.1019	2.09392e-05	0.00407251
PHLDA1	1.15298	2.97749	17.9913	2.21923e-05	0.00419264
FCER1A	-2.67897	1.07314	17.9871	2.22412e-05	0.00419264
SLC1A4	0.952258	3.95863	17.8956	2.3336e-05	0.00433237
ANKRD44	-0.578131	9.18582	17.8385	2.40473e-05	0.00439778
TRANK1	-1.30777	8.49573	17.6808	2.61256e-05	0.00470761
HSPA4L	2.02449	3.28084	17.6343	2.67722e-05	0.00475419
LARP1B	0.576587	5.26587	17.5907	2.73927e-05	0.00479489
ACAD10	-0.489692	3.53666	17.5317	2.82554e-05	0.00481369
PNLDC1	2.13429	1.89156	17.5297	2.82858e-05	0.00481369
KRAS	0.510524	7.64401	17.4832	2.89853e-05	0.00486517
INHBA	1.7067	1.9449	17.3037	3.18565e-05	0.00527484
PEG10	1.46008	1.40938	17.1804	3.39928e-05	0.0054962
TXNL1	0.389746	6.04678	17.1749	3.40905e-05	0.0054962
BTN3A1	-0.868776	7.64244	17.127	3.49615e-05	0.00556342
CPQ	-0.903941	6.44805	17.0613	3.61923e-05	0.00568544
PLCB1	-0.645564	3.5588	16.9717	3.79402e-05	0.00588458
TGFBI	-1.4934	3.96219	16.8993	3.94153e-05	0.00603694
ARMCX3	0.445058	5.88183	16.7629	4.23531e-05	0.00640683
RAB11FIP4	-0.572508	6.04278	16.7144	4.34492e-05	0.00645904
EPHB1	-1.28599	4.02399	16.7012	4.37525e-05	0.00645904
TMX4	-0.6766	7.33083	16.6304	4.54177e-05	0.00662504
GLIPR1	-0.873138	7.48359	16.6004	4.61404e-05	0.00665127
CHORDC1	1.20688	8.10904	16.5499	4.73864e-05	0.00675146
DEFA3	2.75033	4.87655	16.4854	4.90266e-05	0.0068661
ELL2	0.810835	6.40946	16.4744	4.93117e-05	0.0068661
RPS6KA5	-0.780861	5.90028	16.2026	5.69161e-05	0.00783588
AC147651.4	1.08421	2.33107	16.0698	6.10495e-05	0.00831155
FABP5	1.06579	4.46118	16.0119	6.2947e-05	0.00847571
CEACAM6	1.88567	2.55412	15.9757	6.41608e-05	0.00854524
BPI	1.61703	4.41647	15.8959	6.69225e-05	0.00878362
HMHA1	-0.421901	6.76824	15.8817	6.74283e-05	0.00878362
ARL8B	0.451945	7.07733	15.8629	6.81012e-05	0.00878362
YWHAE	0.442242	5.2107	15.7108	7.38027e-05	0.00941715
DUSP16	0.71695	4.75777	15.6729	7.52946e-05	0.00941715
IGHV1-18	1.76018	2.9726	15.6723	7.53188e-05	0.00941715
PID1	-1.84604	1.48615	15.6326	7.69151e-05	0.0095196
OLR1	2.00573	3.03364	15.5699	7.95091e-05	0.00965023
ANKRD28	0.629669	7.34475	15.5657	7.96852e-05	0.00965023
VWA5A	0.732721	4.2985	15.5441	8.0603e-05	0.00965023
MEGF6	-1.31508	1.40978	15.532	8.11209e-05	0.00965023
CTD-2006K23.1	-1.59709	1.36118	15.4781	8.3467e-05	0.00974556
ZNF788	0.765646	3.03708	15.4625	8.41597e-05	0.00974556
LAPTM4B	1.15174	2.09862	15.4591	8.43082e-05	0.00974556
SGCB	0.654681	2.69848	15.4362	8.53399e-05	0.00977261
DAPK2	-1.06183	4.80464	15.4048	8.67672e-05	0.00977931
ASPH	0.79962	7.8023	15.3999	8.69946e-05	0.00977931
CCDC146	-0.860779	4.69442	15.3743	8.81775e-05	0.00982217
CEBPE	1.35845	2.03044	15.3046	9.14933e-05	0.0099644
SAPCD2	1.2218	1.64414	15.3032	9.15595e-05	0.0099644
PCSK5	-0.76878	3.25787	15.2963	9.1894e-05	0.0099644
PDGFC	1.1254	3.16284	15.2362	9.48663e-05	0.010047
IPO11	0.45936	4.76824	15.2215	9.56101e-05	0.010047
ARHGEF1	-0.490871	5.65498	15.2203	9.5671e-05	0.010047
SNRPG	0.960358	4.74121	15.2151	9.59354e-05	0.010047
IGLV3-19	1.68599	4.28583	15.1832	9.75658e-05	0.0101311
HS3ST3B1	0.792019	4.78413	15.1487	9.93673e-05	0.0102315
CADM1	1.44589	4.18454	15.1019	0.000101862	0.0102625
HPRT1	0.596512	3.84007	15.1014	0.000101889	0.0102625
P4HA2	1.20471	1.85766	15.096	0.000102182	0.0102625
SEC24A	0.514391	6.13892	15.0514	0.000104621	0.0103858
AMICA1	-0.899846	9.6712	15.0427	0.000105104	0.0103858
ABCG1	-1.11978	3.98312	14.9539	0.000110168	0.0107991
IL10RA	-0.389731	6.54769	14.8919	0.000113849	0.0110713
CD24	1.44578	6.24265	14.7354	0.000123701	0.0119347
BCL2L15	1.2543	2.15932	14.7063	0.000125623	0.0119729
RASGEF1B	0.574294	5.79555	14.6999	0.000126051	0.0119729
LDHA	0.716202	8.92607	14.6729	0.000127871	0.012016
SUGT1	0.443712	6.52397	14.6634	0.000128516	0.012016
CBX7	-0.535836	3.28122	14.5835	0.000134084	0.012016
RCBTB2	-0.66185	5.94523	14.5736	0.000134793	0.012016
ADAMTS3	1.59039	1.05433	14.5656	0.000135363	0.012016
DCUN1D4	0.468075	5.41278	14.5614	0.000135667	0.012016
CCL3	1.49089	3.52712	14.5449	0.00013686	0.012016
ABCA7	-0.849862	4.6229	14.5424	0.000137041	0.012016
KCNQ1	-0.895855	2.01006	14.5406	0.000137173	0.012016
IGKV1-27	1.75963	2.40307	14.5397	0.00013724	0.012016
RBP7	-1.6409	2.40023	14.5389	0.000137293	0.012016
LTF	1.8653	5.48612	14.4437	0.000144412	0.0124874
OLAH	1.64569	4.08747	14.4383	0.00014483	0.0124874
MAN2B2	-0.44734	4.76685	14.4265	0.000145735	0.0124874
FAM132B	2.9777	0.72124	14.3802	0.000149368	0.0127098
ABCA13	1.37831	5.88515	14.3623	0.000150794	0.0127426
SDC2	1.52665	1.35627	14.2463	0.000160375	0.0134594
DEPDC1	1.01215	4.11251	14.2262	0.000162097	0.0135114
PDZK1IP1	-1.63419	2.12299	14.1838	0.000165793	0.0137261
CACYBP	1.05991	7.55541	14.1618	0.000167737	0.0137939
ANKRD37	0.701141	2.00728	14.1441	0.000169326	0.0138316
CTC-490G23.4	1.89516	2.07357	14.1298	0.000170622	0.0138453
TMEM68	0.371626	4.4106	14.0478	0.000178224	0.0142757
CD177	1.82703	9.12984	14.0323	0.000179701	0.0142757
RP11-256L6.2	-0.989404	2.59798	14.028	0.000180107	0.0142757
RBL2	-0.376734	8.76002	14.023	0.000180587	0.0142757
HLA-DRB1	-0.829646	6.43075	14.0105	0.000181794	0.0142789
MYOM2	-1.61884	3.81188	13.9867	0.000184109	0.0143687
LARP4	0.386759	6.54804	13.961	0.000186645	0.0144744
ACTRT3	1.68752	0.0564014	13.9346	0.000189279	0.0145864
MPZL2	-1.13334	3.40458	13.8791	0.000194951	0.0149296
JUN	0.972801	5.20684	13.864	0.000196525	0.0149567
ICAM3	-0.712037	7.07972	13.8114	0.000202101	0.0152861
GFPT1	0.499964	6.07756	13.7178	0.000212428	0.0159686
C9orf156	-0.349031	5.64844	13.6906	0.000215534	0.0160727
CTSS	-0.73066	11.1144	13.6705	0.000217849	0.0160727
SDC4	1.11506	1.62966	13.6617	0.000218875	0.0160727
PHKG2	-0.528611	2.50193	13.6601	0.00021906	0.0160727
HIBCH	0.617113	5.79593	13.6466	0.000220645	0.0160927
C14orf159	-0.891277	6.8065	13.5658	0.000230344	0.0167006
LTB	-0.645377	5.91098	13.4923	0.000239546	0.0172656
MAN2C1	-0.549465	3.15614	13.4595	0.000243774	0.0174676
CDK5RAP3	-0.390069	5.37572	13.4462	0.000245506	0.0174894
KLF10	0.648234	3.59708	13.4351	0.000246958	0.0174912
PPAP2B	1.18745	1.38542	13.3969	0.000252045	0.0177489
GFM2	0.338845	5.91674	13.3095	0.000264062	0.0184888
TBCA	0.724368	4.26119	13.2839	0.000267697	0.0185029
FMO5	-0.783428	2.81604	13.2779	0.000268547	0.0185029
GGH	1.15411	4.89476	13.2762	0.000268792	0.0185029
UBA7	-0.68307	5.28444	13.2183	0.000277226	0.0189415
ZNF136	-0.396362	4.70062	13.2114	0.000278256	0.0189415
TMEM38B	0.613694	4.40252	13.1768	0.000283439	0.0191704
TGIF1	0.54426	3.85026	13.1596	0.000286053	0.0191704
CDK6	0.697913	6.96326	13.1579	0.000286312	0.0191704
RASGEF1A	0.715579	3.19676	13.0923	0.000296512	0.0197455
DHCR7	1.04936	2.15766	13.0533	0.000302756	0.0200523
FLT1	0.963938	4.90706	12.9771	0.000315316	0.0207367
AMOTL1	1.12017	1.97825	12.9703	0.000316475	0.0207367
RPL17P50	0.985013	1.63539	12.9479	0.000320287	0.0208748
GABBR1	0.882985	4.2028	12.8913	0.000330114	0.0214015
IGHV1-24	1.71234	2.78451	12.8784	0.000332396	0.021436
TKTL1	1.23453	2.14466	12.8597	0.00033573	0.0215377
EFCAB7	0.601003	3.90164	12.8316	0.000340811	0.0217498
MPO	2.09821	4.4262	12.8076	0.000345215	0.0219167
PLIN2	0.955333	6.48567	12.7771	0.000350893	0.0221478
BNIP3	0.622133	3.63421	12.7687	0.000352471	0.0221478
DAAM1	0.436007	4.74154	12.7449	0.000356986	0.0222144
GAA	-0.8061	2.71739	12.744	0.000357157	0.0222144
AMY2B	-0.624842	4.4733	12.7082	0.000364056	0.0225292
NT5DC2	0.940364	2.0125	12.6785	0.000369882	0.0227747
CD1D	-0.792966	4.35948	12.6495	0.00037567	0.0230154
HSD11B1	1.73546	2.14065	12.6073	0.000384237	0.023355
PSMC3IP	0.66635	2.53775	12.5776	0.000390404	0.023355
NHS	-1.29312	1.71409	12.5775	0.000390427	0.023355
ZNF18	-0.43092	4.06891	12.5764	0.000390642	0.023355
NNT-AS1	0.49852	3.09601	12.5667	0.00039269	0.023355
MPEG1	-0.965768	7.11097	12.5641	0.000393222	0.023355
CD46	-0.629326	9.47824	12.5578	0.000394556	0.023355
CRISPLD2	-1.10164	6.89734	12.5425	0.000397808	0.0234043
CTSL	1.32756	7.92303	12.5359	0.000399208	0.0234043
SQLE	0.841877	5.43633	12.5108	0.000404609	0.023608
IGLV3-25	1.81552	4.11514	12.4963	0.000407763	0.0236278
ATP2C1	0.376927	7.05998	12.4858	0.000410054	0.0236278
ATP8B4	0.697076	6.86417	12.4827	0.000410734	0.0236278
ELANE	2.46412	1.66259	12.471	0.000413312	0.0236374
DNAJA4	1.31769	6.76445	12.4645	0.00041476	0.0236374
PLEKHG3	-0.685072	4.51408	12.4412	0.000419962	0.0237932
TPST2	0.432002	6.11892	12.432	0.000422045	0.0237932
SOD1	0.617934	6.88601	12.4234	0.000423979	0.0237932
TMED5	0.369695	7.82034	12.4178	0.00042526	0.0237932
IGHV3-21	1.68415	1.47718	12.3747	0.000435202	0.0242388
HINT1	0.854406	5.97892	12.3612	0.000438342	0.0243032
PANK3	0.367722	7.58886	12.3512	0.000440698	0.0243237
DNAH1	-0.533628	4.78682	12.2505	0.000465136	0.0255138
ZFAND2A	0.859129	3.93628	12.2434	0.000466903	0.0255138
UNC13B	0.880423	1.71668	12.2345	0.000469152	0.0255138
ERAP2	-0.904372	8.32512	12.2287	0.000470589	0.0255138
ARHGAP42	0.78853	3.51885	12.1677	0.000486244	0.02615
CA2	1.17656	4.12436	12.1617	0.000487815	0.02615
DPEP2	-0.843082	4.05734	12.1582	0.000488725	0.02615
RGS1	1.30804	4.81597	12.1494	0.000491025	0.0261588
HDGFRP3	0.592123	4.49069	12.1347	0.000494932	0.0262528
CD83	0.999444	5.4	12.1058	0.000502659	0.0264436
SCN8A	1.16929	1.93356	12.1051	0.000502844	0.0264436
PPA2	0.485723	6.05005	12.0925	0.000506262	0.0265095
UQCRHL	0.888219	3.96359	12.0434	0.000519766	0.0271008
C2orf69	0.385568	4.78531	12.0316	0.00052306	0.027157
STX10	-0.564059	4.81937	12.0156	0.000527582	0.0272762
RRM2B	-0.51816	6.75378	11.9513	0.000546099	0.0280379
CLDN12	0.705839	1.85038	11.9486	0.000546892	0.0280379
HSP90AA1	1.42302	11.0307	11.9379	0.000550045	0.0280821
HIST1H4L	1.01551	5.96945	11.9261	0.000553528	0.0281337
MS4A3	1.75375	4.66944	11.919	0.000555649	0.0281337
IGLV1-40	1.44586	3.06411	11.9043	0.000560049	0.0282151
ARHGAP25	-0.47415	8.19311	11.8979	0.00056196	0.0282151
CDK1	1.02579	4.58144	11.8886	0.000564794	0.0282151
MAP3K7CL	-0.896427	5.06554	11.8831	0.000566467	0.0282151
KIAA1257	-1.05797	1.55853	11.8558	0.000574824	0.0285154
SNRK	-0.479502	8.22066	11.8417	0.000579177	0.0286156
MRPL1	0.735609	4.14795	11.7716	0.000601406	0.0295731
RP11-51F16.1	-0.550155	3.27645	11.7655	0.000603384	0.0295731
MRC2	-1.70201	2.65746	11.7557	0.000606582	0.0296114
AHI1	0.568526	4.85371	11.7358	0.000613087	0.0298009
CETN3	0.814881	3.88027	11.729	0.000615329	0.0298009
ZCWPW1	-0.519088	2.76256	11.7215	0.000617817	0.0298036
PLEKHO1	-0.612907	5.58453	11.6797	0.000631859	0.0302955
ITGB3BP	0.648077	4.60653	11.6765	0.00063296	0.0302955
RP11-640L9.2	-1.14862	3.46417	11.6511	0.000641651	0.0303912
BTN3A3	-0.623038	6.57214	11.6503	0.000641939	0.0303912
RDX	0.419939	5.64073	11.6489	0.0006424	0.0303912
ARFIP1	-0.497657	6.19136	11.591	0.000662702	0.0311814
RAB13	0.879563	2.90962	11.5748	0.00066853	0.0311814
RP11-44F14.1	-1.08155	4.13704	11.5637	0.00067253	0.0311814
SNORD3B-1	1.2882	1.13586	11.5604	0.00067373	0.0311814
FCGRT	-0.746794	4.60262	11.5578	0.000674655	0.0311814
MAN1C1	-0.610993	2.0592	11.5523	0.000676637	0.0311814
COL17A1	1.47522	2.8201	11.5465	0.000678771	0.0311814
TUBB6	0.91409	3.84358	11.5446	0.00067946	0.0311814
AKAP5	1.32385	4.77948	11.502	0.00069522	0.031709
LPL	-2.31832	2.28346	11.4995	0.000696132	0.031709
IRF4	0.903539	6.01821	11.4602	0.000711023	0.0322673
LRRN3	-1.14341	2.79759	11.4362	0.00072027	0.0325447
MPPE1	-0.419788	5.96633	11.4306	0.000722449	0.0325447
HPCAL4	0.810741	1.38604	11.4083	0.000731176	0.0328172
FAM72A	0.774627	1.88601	11.3829	0.000741249	0.0331479
HSPE1P18	-0.885546	3.90264	11.2927	0.000778115	0.0345166
CDKN3	0.854613	3.88713	11.2841	0.000781757	0.0345166
TRMT112	0.537965	5.88133	11.2827	0.000782341	0.0345166
TLK1	0.33766	7.34167	11.2768	0.000784828	0.0345166
NUSAP1	0.642574	6.09723	11.2741	0.00078594	0.0345166
LMNA	0.935998	3.46958	11.2633	0.000790563	0.0345956
RGS2	-1.22822	8.72224	11.2387	0.000801086	0.0347385
CA8	0.749811	2.34777	11.2368	0.000801918	0.0347385
LAMTOR4	-0.445836	5.25846	11.2349	0.00080273	0.0347385
SH3RF1	0.787502	2.57332	11.2293	0.000805169	0.0347385
CSPP1	0.350314	5.12797	11.2195	0.000809437	0.0348001
ANLN	0.855815	4.70553	11.209	0.00081401	0.0348743
CLCN4	-0.870397	2.99532	11.1905	0.000822193	0.0350784
THAP2	0.518773	4.60343	11.1853	0.000824499	0.0350784
SGOL1	0.655273	2.53162	11.1559	0.000837654	0.0353467
LINC01504	-0.897249	1.953	11.1539	0.000838535	0.0353467
FAM72B	0.987239	1.51913	11.1519	0.000839459	0.0353467
IGHV3-53	1.78619	2.43605	11.1392	0.000845221	0.0353795
SPINT1	-1.19969	1.2376	11.1312	0.000848872	0.0353795
BMP8B	0.86662	2.05335	11.1312	0.000848899	0.0353795
LDLR	0.740343	3.87805	11.1229	0.000852706	0.0354176
PSME1	-0.488873	7.43477	11.1066	0.000860206	0.0356085
NSMCE2	0.419732	4.3055	11.0738	0.000875552	0.0360378
KIF13A	-0.705743	6.76598	11.0719	0.00087646	0.0360378
RAB23	0.591731	2.79964	11.0605	0.000881857	0.0361385
C1orf52	0.304537	4.47099	11.0429	0.000890268	0.0363615
CD302	-0.862779	5.05291	11.0071	0.000907652	0.0369484
JOSD1	0.477334	5.46243	10.9989	0.000911682	0.0369895
TIMD4	1.50952	2.42352	10.9866	0.000917743	0.037005
METTL7B	1.50903	3.21301	10.9858	0.000918102	0.037005
F2RL1	-1.29594	4.18437	10.9723	0.000924852	0.0370604
PAK1	-0.7103	6.99564	10.9669	0.000927544	0.0370604
EME1	0.905277	2.16401	10.9649	0.000928552	0.0370604
PTPN22	0.417233	6.7721	10.9588	0.000931588	0.0370609
POLM	-0.445711	2.11958	10.9419	0.000940147	0.0372803
LINC00989	-1.2579	2.73797	10.9031	0.000960035	0.0379462
TMEM39A	0.343059	5.8807	10.8847	0.000969619	0.0381767
SPRY2	1.31387	1.30253	10.88	0.0009721	0.0381767
RP11-256L6.3	-1.4669	2.9238	10.8461	0.000990059	0.0387578
RP11-640L9.1	-1.15569	2.06131	10.8219	0.00100306	0.0391417
CHN2	-0.737167	3.7483	10.8157	0.0010064	0.0391475
IGLV1-44	1.56186	2.84456	10.8092	0.00100996	0.0391614
PTGES3	0.610842	7.32862	10.7837	0.00102398	0.039536
HSBP1L1	0.863524	1.64829	10.7765	0.00102798	0.039536
PCBD1	0.778127	2.11003	10.7741	0.0010293	0.039536
S100B	-1.53556	3.00846	10.7506	0.00104244	0.0397997
ZKSCAN4	-0.41899	3.47419	10.7502	0.00104266	0.0397997
TTK	0.939423	4.13027	10.7268	0.00105594	0.0400467
PYCR1	1.1394	1.92382	10.7225	0.00105839	0.0400467
IGHV2-70	1.51404	1.32629	10.7216	0.00105894	0.0400467
LRRN1	1.10864	3.94479	10.6912	0.00107646	0.0405843
CARD9	-0.915042	2.81467	10.6798	0.00108315	0.040711
USP14	0.3967	5.68861	10.6589	0.00109544	0.0409273
NDFIP2	0.903341	3.35504	10.6586	0.00109558	0.0409273
CXCL5	-1.37343	3.22576	10.6524	0.00109927	0.0409404
TAGLN	-1.25992	2.37724	10.6373	0.0011083	0.0411515
HSD17B11	-0.679401	7.10232	10.606	0.00112722	0.0417276
HIST1H3J	1.04438	3.42206	10.5555	0.00115844	0.0427542
MTHFD1L	0.570051	3.45081	10.5445	0.00116537	0.0428805
UBFD1	0.368495	4.95271	10.5244	0.00117811	0.0432197
PKP2	0.841795	1.66239	10.5071	0.00118919	0.0433408
GINS1	0.779729	2.35713	10.5041	0.00119108	0.0433408
NEDD4	0.732601	5.9525	10.5027	0.00119202	0.0433408
ALMS1P	-2.48753	3.34906	10.4891	0.00120079	0.0435303
ITGA9	0.807107	3.00105	10.4634	0.00121766	0.0440116
ARG2	0.916325	1.93578	10.4574	0.00122157	0.0440234
MBOAT1	-0.62119	5.14698	10.4399	0.00123324	0.0443135
USP45	0.406561	4.55489	10.427	0.00124187	0.0444929
ZNF217	-0.412603	7.8349	10.4163	0.00124906	0.0446201
AC074289.1	-0.873163	3.2779	10.4068	0.00125553	0.0447209
DOCK2	-0.377743	9.23903	10.3988	0.001261	0.0447431
BHLHE41	0.69269	1.64899	10.3952	0.00126346	0.0447431
SEL1L3	0.499442	7.38797	10.3772	0.00127581	0.044748
AMPD2	-0.728213	4.1508	10.3719	0.00127945	0.044748
KAT8	-0.314285	4.80969	10.3662	0.00128343	0.044748
PARVG	-0.445485	6.20858	10.3648	0.00128442	0.044748
STOM	0.783632	9.45766	10.3641	0.00128491	0.044748
TNFSF8	-0.480974	4.69121	10.3576	0.00128941	0.044748
IGLV9-49	1.94571	1.89791	10.3575	0.00128946	0.044748
BEND2	-1.21721	2.55443	10.3528	0.00129281	0.044748
CFAP54	0.989608	3.32245	10.329	0.00130958	0.0452007
LINC00847	0.505667	4.04255	10.3142	0.00132011	0.0454361
IGLC3	1.33354	5.53896	10.3073	0.00132507	0.0454791
DEFA4	2.08493	3.74423	10.2872	0.00133954	0.0458476
RP11-473M20.9	-0.943275	2.87921	10.2615	0.00135833	0.046361
FBP1	-1.02613	2.88467	10.2492	0.00136745	0.0465425
LGALS2	-2.21822	1.95368	10.2412	0.00137338	0.0466149
CCDC170	-1.26541	1.89569	10.2329	0.00137955	0.0466446
SEPT9	-0.468284	5.30963	10.2244	0.00138594	0.0466446
KPNA2	0.686104	3.59276	10.2205	0.0013889	0.0466446
PSMB5	0.54134	4.67984	10.2151	0.00139298	0.0466446
CD80	0.713007	1.75957	10.2137	0.00139401	0.0466446
CCNYL1	0.403657	4.53033	10.2095	0.00139722	0.0466446
NAPSB	-0.776038	4.18733	10.2046	0.0014009	0.0466446
HOMER1	0.557637	2.74247	10.1511	0.00144217	0.0478263
ALDH1A1	-1.20868	4.28863	10.1485	0.0014442	0.0478263
ST8SIA4	-0.400726	8.26816	10.1427	0.00144875	0.0478399
MAFG	0.787981	3.42049	10.138	0.00145242	0.0478399
LDB1	-0.331015	4.53138	10.1094	0.00147513	0.0484578
CENPA	0.950844	1.85693	10.0951	0.00148667	0.0487064
IGLV2-23	1.44243	1.29012	10.0883	0.00149217	0.0487538
TOMM40L	0.584265	4.10804	10.0834	0.00149608	0.0487538
EAF2	0.371164	5.15289	10.0695	0.00150747	0.0488199
SLC39A14	0.752826	3.13609	10.0678	0.00150883	0.0488199
CRLF3	-0.364188	7.65675	10.061	0.00151443	0.0488199
ABAT	-0.711037	3.53704	10.0592	0.00151589	0.0488199
LINC01059	-1.79026	2.07275	10.0566	0.00151803	0.0488199
NKG7	0.878619	3.99473	10.0462	0.00152663	0.048968
IGLV6-57	1.52074	3.79483	10.0358	0.00153526	0.0491111
TSPYL4	0.557105	3.54963	10.0312	0.00153911	0.0491111
SUV39H2	0.669246	3.56702	9.99135	0.00157277	0.0499671
ZNF706	0.462212	5.83934	9.98981	0.00157409	0.0499671
IL21	1.33849	1.91594	9.96892	0.00159204	0.0504065
NDUFAF2	0.72456	2.73067	9.95845	0.00160113	0.0505635
SFXN1	0.588262	5.90791	9.93635	0.00162046	0.0510425
WEE1	0.597292	4.75382	9.93047	0.00162565	0.0510746
PDE4D	0.639277	6.78033	9.92002	0.0016349	0.051234
SLC2A9	-0.778093	2.01102	9.89323	0.00165888	0.0517686
ZC3H12C	0.837332	2.86419	9.89153	0.00166041	0.0517686
ARHGAP4	-0.396136	4.96144	9.8699	0.00168004	0.0521219
TAF7	0.490099	7.18162	9.86849	0.00168133	0.0521219
GYS1	0.537905	2.85018	9.86377	0.00168565	0.0521219
snoU2_19	1.08236	1.88095	9.86028	0.00168886	0.0521219
IL1R2	1.27428	8.88903	9.85575	0.00169302	0.0521219
NKRF	0.471045	3.95664	9.84764	0.0017005	0.0521812
KIR3DL2	1.49332	0.55513	9.84294	0.00170485	0.0521812
UBE2G1	0.391931	5.89173	9.83831	0.00170915	0.0521812
CNPY3	-0.375881	4.70443	9.83527	0.00171198	0.0521812
ATP13A3	0.510974	8.15197	9.82974	0.00171713	0.0522083
RPS27L	0.791861	5.86271	9.81807	0.00172805	0.0522903
CCDC88B	-0.529301	5.88605	9.81546	0.00173051	0.0522903
TNFAIP8L2	-0.510824	5.10235	9.81148	0.00173426	0.0522903
ARNTL	-0.436571	5.9736	9.80869	0.00173689	0.0522903
XPC	-0.365047	6.07925	9.79402	0.0017508	0.0525797
MS4A2	-1.54835	1.26708	9.77013	0.0017737	0.0531078
ALDH1L2	1.13365	2.94235	9.76666	0.00177705	0.0531078
CD101	-0.805664	3.09201	9.75141	0.00179185	0.0534198
GRAMD1B	-1.5683	5.13485	9.74403	0.00179906	0.0534802
CD163	1.1594	8.1362	9.73821	0.00180477	0.0534802
PLCB2	-0.678241	5.40104	9.73597	0.00180697	0.0534802
CRYZ	0.646558	4.64041	9.72862	0.00181421	0.053565
MOCS2	0.440689	3.85106	9.72076	0.00182198	0.0536652
KCTD9	0.338619	5.59549	9.68784	0.00185491	0.0545041
OTUD1	0.519697	5.11713	9.67464	0.00186829	0.0547658
KDELR2	0.379212	5.31074	9.66362	0.00187953	0.054963
OGFRL1	-0.652111	8.00554	9.65927	0.00188399	0.054963
TEC	0.539509	4.22931	9.59635	0.00194964	0.05642
KIF18A	0.560949	4.25988	9.59171	0.00195457	0.05642
COX6A1	0.536735	2.82788	9.59124	0.00195508	0.05642
RP11-325F22.2	0.72369	3.98007	9.59036	0.00195601	0.05642
SKA1	0.984824	2.98398	9.58948	0.00195695	0.05642
MLEC	0.426172	6.34928	9.57645	0.00197089	0.0566885
ZBTB21	0.320195	5.49166	9.55485	0.00199422	0.0572253
HLA-H	-1.06164	3.88114	9.54604	0.00200382	0.0573605
STAT6	-0.381077	7.19616	9.54194	0.0020083	0.0573605
GKAP1	0.556923	3.35007	9.53387	0.00201715	0.0574523
FAM175B	0.341783	3.92127	9.52418	0.00202782	0.0574523
SNX9	0.452846	4.99372	9.52418	0.00202782	0.0574523
SUZ12	0.29453	6.09522	9.51803	0.00203463	0.0574523
TNFRSF10C	-1.00101	7.70417	9.51774	0.00203495	0.0574523
TBCC	-0.339557	5.13207	9.50624	0.00204774	0.0576804
GIMAP4	-0.695646	9.0463	9.4904	0.0020655	0.0580472
IGLV2-14	1.29668	2.64195	9.47724	0.00208037	0.0581099
C17orf67	0.822975	2.74821	9.47656	0.00208114	0.0581099
CENPW	0.897244	2.48899	9.47503	0.00208288	0.0581099
HLA-DPA1	-0.626847	6.90615	9.47166	0.0020867	0.0581099
ARHGEF6	-0.353784	7.81864	9.45988	0.00210014	0.0583516
GAS6	0.652963	3.12739	9.43818	0.00212515	0.0588286
TECPR1	-0.364163	4.29326	9.43325	0.00213087	0.0588286
AC011816.1	-1.01723	2.62021	9.4258	0.00213954	0.0588286
FAM188A	0.446806	6.38503	9.42479	0.00214072	0.0588286
AK4	0.980957	2.41307	9.42428	0.00214132	0.0588286
RPL39	0.822949	6.94452	9.41666	0.00215023	0.0589414
PRC1	0.750666	4.33617	9.40506	0.00216387	0.0591567
RWDD1	0.396844	4.79803	9.3958	0.00217483	0.0591567
TWSG1	0.492453	3.52657	9.39384	0.00217716	0.0591567
MMRN1	1.08867	5.14646	9.39031	0.00218135	0.0591567
RBM43	-0.845221	3.88369	9.38957	0.00218223	0.0591567
PRLR	-0.956984	1.35513	9.37787	0.0021962	0.0594041
SHCBP1	0.911266	4.77803	9.36753	0.00220863	0.0596086
CKAP2L	0.82574	3.80843	9.35542	0.00222327	0.0598451
CMB9-22P13.1	0.785527	1.74151	9.3498	0.00223009	0.0598451
PHGDH	0.992302	3.18492	9.3482	0.00223204	0.0598451
HLA-B	-0.493026	10.5413	9.34226	0.00223929	0.0599084
PHF6	0.372375	6.22728	9.33631	0.00224658	0.0599605
LGALS1	0.882664	7.77132	9.33268	0.00225103	0.0599605
CTD-2521M24.9	-0.737681	2.23727	9.31747	0.00226979	0.0602725
SLC44A1	0.438986	6.55022	9.31522	0.00227258	0.0602725
HEXDC	-0.641474	2.5035	9.30891	0.00228042	0.0603497
MTDH	0.397454	8.02423	9.29659	0.00229581	0.0606262
ITGA7	0.896098	2.73132	9.28752	0.00230721	0.0607698
HLA-E	-0.569374	11.1977	9.28091	0.00231555	0.0607698
RP11-521I2.3	0.590514	2.7675	9.27806	0.00231915	0.0607698
RP11-705C15.3	-0.492622	5.04841	9.27653	0.00232109	0.0607698
TLE1	0.580064	3.18037	9.26784	0.00233212	0.0609228
MANBA	-0.440024	6.93662	9.26411	0.00233687	0.0609228
CH17-118O6.2	-0.836461	3.12216	9.25813	0.00234453	0.0609925
KCNN3	0.944654	2.4276	9.24732	0.0023584	0.0610074
SUB1	0.601211	7.90725	9.24346	0.00236338	0.0610074
COX7A2	0.552723	5.66699	9.24335	0.00236352	0.0610074
CPA3	-1.30165	1.15323	9.2422	0.00236501	0.0610074
HIST1H3B	1.03708	6.11391	9.23611	0.00237289	0.0610117
SLC3A2	0.583486	5.58519	9.23437	0.00237514	0.0610117
PARPBP	0.594639	4.29546	9.22804	0.00238337	0.061095
SEC11C	0.985679	6.50252	9.21723	0.00239748	0.0613284
STAT5A	-0.520351	6.47219	9.2131	0.00240289	0.0613387
RPL39L	0.751754	1.33161	9.20228	0.00241714	0.0615741
AZI2	0.444804	6.29259	9.19132	0.00243165	0.0617466
NBR1	-0.349315	7.97788	9.18593	0.00243882	0.0617466
MMP25-AS1	-0.733479	1.99154	9.18203	0.00244403	0.0617466
SPATS2	0.62268	3.37879	9.18201	0.00244406	0.0617466
RCSD1	-0.351468	7.76068	9.15697	0.00247773	0.0624683
HAVCR2	0.774101	6.63645	9.14141	0.00249888	0.0627701
TYK2	-0.34301	5.67325	9.14063	0.00249994	0.0627701
ZNF33A	-0.461011	7.69364	9.12339	0.00252361	0.0632348
NECAB1	1.2514	1.57873	9.11552	0.0025345	0.0633324
ORC6	0.814332	2.82771	9.11311	0.00253784	0.0633324
CLEC4A	-0.761193	5.43919	9.10477	0.00254943	0.0634057
SLC2A5	0.929643	3.12454	9.10297	0.00255194	0.0634057
MORF4L2	0.491292	6.29528	9.09985	0.00255631	0.0634057
SOAT1	-0.296984	6.72301	9.08652	0.00257501	0.0637406
SNX14	0.257352	6.84003	9.076	0.00258985	0.0639788
RP11-730K11.1	-0.796993	2.64561	9.0636	0.00260749	0.0642848
HMGCS1	0.556014	6.48001	9.05917	0.00261381	0.0643113
IGKV3-11	0.904046	4.17847	9.04499	0.00263415	0.0645935
EEPD1	-0.64135	2.88131	9.04045	0.00264071	0.0645935
ARSD	-0.585694	3.3609	9.03952	0.00264205	0.0645935
CRY1	0.336812	4.05101	9.03654	0.00264637	0.0645935
CARS2	-0.489972	6.48325	9.00242	0.00269623	0.0656796
LRRC4	-0.77055	5.54979	8.99001	0.0027146	0.0659961
CRYL1	-0.712152	2.29705	8.98071	0.00272844	0.0661072
RP11-290D2.6	0.841333	3.36376	8.97969	0.00272996	0.0661072
LY75	-0.370997	4.81679	8.95346	0.00276945	0.0667113
MX2	-0.889822	7.1741	8.95257	0.0027708	0.0667113
RALA	0.318185	4.21354	8.95227	0.00277124	0.0667113
RP11-734K2.4	-0.466938	4.34501	8.93621	0.00279573	0.0671688
IGHV3-23	1.27471	4.89794	8.92504	0.00281287	0.0674483
AP003068.23	-0.750686	2.18324	8.89764	0.0028554	0.0683344
HLA-C	-0.766356	10.3461	8.88153	0.0028807	0.0688054
PYCARD	-0.507689	5.16718	8.85717	0.0029194	0.0694907
FANCL	0.331078	4.45908	8.85634	0.00292073	0.0694907
MFF	0.26042	6.29618	8.8501	0.00293072	0.0695933
LIN52	0.389636	3.76341	8.8412	0.00294506	0.0697984
C3orf52	0.803051	1.5568	8.83338	0.0029577	0.0699628
MAPK6	0.442021	6.34054	8.82659	0.00296872	0.0700881
TTC12	-0.553074	3.79367	8.80981	0.00299616	0.0704007
AP003041.1	1.03749	1.45854	8.80897	0.00299753	0.0704007
EFCAB13	0.556385	4.48662	8.80699	0.00300078	0.0704007
MASTL	0.400371	4.83566	8.80447	0.00300494	0.0704007
SRBD1	-0.410025	6.46944	8.77462	0.00305451	0.0713708
SMAD5	0.366516	5.39121	8.76781	0.00306593	0.0713708
ARHGEF3	-0.498283	6.49647	8.76348	0.00307322	0.0713708
SPC25	0.860392	2.19613	8.76271	0.00307452	0.0713708
MDM2	0.296368	8.24198	8.7587	0.00308128	0.0713708
UTRN	-0.561938	9.94286	8.75869	0.0030813	0.0713708
TCTN3	0.432646	2.60456	8.73708	0.00311804	0.0720855
PAWR	0.553225	4.00222	8.7295	0.00313102	0.0722429
MT2A	0.924235	5.73628	8.72623	0.00313664	0.0722429
LRRC42	0.492598	2.66392	8.7227	0.00314272	0.0722473
RP11-355N15.1	0.944015	1.36441	8.71678	0.00315295	0.0722654
XRCC2	0.786512	3.36307	8.71541	0.00315531	0.0722654
CEP19	-0.778957	5.11148	8.71174	0.00316167	0.072276
ZNF641	-0.556613	6.12818	8.70057	0.00318111	0.0725851
ACYP1	0.496143	3.05602	8.69171	0.0031966	0.0727155
IGHA1	1.27963	7.5359	8.68988	0.00319982	0.0727155
RHOB	0.849623	5.90979	8.68312	0.00321171	0.0727155
NLRP1	-0.644149	5.53988	8.68048	0.00321636	0.0727155
CORO1B	-0.493837	3.47054	8.67365	0.00322844	0.0727155
CPVL	-0.745826	6.10973	8.67156	0.00323215	0.0727155
PFKM	0.388002	3.21075	8.67154	0.00323219	0.0727155
CCDC7	0.283653	5.23173	8.67034	0.00323431	0.0727155
ZBTB1	0.418067	7.21746	8.65773	0.00325677	0.0730865
ZNF710	-0.578451	2.8686	8.65351	0.00326431	0.0731218
RP11-44F14.8	-1.22093	1.64835	8.64502	0.00327957	0.0733295
CEP112	0.518126	2.35249	8.63472	0.00329816	0.0735803
HMGB3	0.862131	4.04245	8.63216	0.0033028	0.0735803
C4BPA	-1.62414	3.53623	8.62585	0.00331427	0.0736753
LINC00324	-0.44884	3.56763	8.6232	0.00331909	0.0736753
CLEC1B	0.680117	4.06183	8.60888	0.00334528	0.0741163
COX7B	0.532845	4.73613	8.60391	0.00335442	0.0741163
LIMD2	-0.370115	6.15941	8.59907	0.00336335	0.0741163
TRIM39	-0.388318	4.05114	8.59591	0.00336918	0.0741163
MIEF1	0.437733	3.85254	8.59425	0.00337226	0.0741163
HCLS1	-0.448969	9.48874	8.59264	0.00337525	0.0741163
RP11-1E4.1	-0.396764	2.27443	8.5867	0.00338628	0.0741372
HSP90B1	0.735944	9.16291	8.58561	0.0033883	0.0741372
HSD17B12	0.417208	5.42457	8.55688	0.0034422	0.0750738
NUDC	0.591702	5.33111	8.55626	0.00344336	0.0750738
HAL	-1.01681	5.82019	8.54375	0.0034671	0.0754572
CCM2	-0.365211	5.83101	8.51152	0.00352905	0.0765521
ARRDC4	0.763694	3.90254	8.51108	0.00352991	0.0765521
CCT4	0.559491	7.15276	8.49604	0.00355921	0.0770512
POLR3G	0.632844	2.5156	8.48256	0.00358568	0.0774873
FBXL14	0.733279	3.34733	8.4778	0.00359507	0.077499
RP11-799D4.4	-0.591423	2.61129	8.47461	0.00360138	0.077499
USMG5	0.653633	4.95618	8.47051	0.00360951	0.077499
TPI1	0.551075	7.24451	8.46949	0.00361152	0.077499
DNAJB9	0.57761	5.89811	8.45238	0.00364567	0.0780951
B3GALT4	-0.335236	3.35229	8.44647	0.00365752	0.0782123
CROCC	-0.536594	2.28938	8.43276	0.00368521	0.078434
ARSG	-0.497685	3.44205	8.43242	0.00368589	0.078434
PDCD5	0.537302	4.63784	8.42911	0.0036926	0.078434
SLC7A1	0.521447	4.01749	8.42783	0.00369521	0.078434
LINC00402	-0.878717	3.32187	8.42552	0.00369991	0.078434
ZSCAN16	-0.438496	3.40437	8.42085	0.00370942	0.078434
ARRDC5	-0.609862	1.84358	8.41672	0.00371785	0.078434
ITM2B	-0.608146	9.72329	8.41611	0.0037191	0.078434
TMC6	-0.377973	4.81993	8.4001	0.00375201	0.078992
ARHGAP11A	0.704381	4.98646	8.39064	0.00377157	0.0791385
SETD8	0.336496	4.15261	8.39049	0.00377188	0.0791385
IGLV3-21	1.39504	3.57221	8.38184	0.00378989	0.079254
ENKUR	-1.1595	1.71771	8.38094	0.00379176	0.079254
ADIPOR2	0.286554	5.76518	8.37853	0.00379679	0.079254
PFDN4	0.849682	3.53576	8.36958	0.00381554	0.0795099
LRMP	-0.459721	7.66007	8.34888	0.00385925	0.0802842
RP11-18B3.2	0.683653	2.31396	8.344	0.00386962	0.0803635
RHEB	0.342722	5.14881	8.33244	0.00389434	0.0806507
CECR1	-0.676802	5.62401	8.33138	0.00389661	0.0806507
RAB11FIP1	-0.569482	7.69365	8.31942	0.00392235	0.0810465
TTLL1	-0.57396	1.72778	8.31218	0.00393801	0.0811249
MRPL22	0.452789	3.76305	8.31154	0.00393939	0.0811249
RAB30	0.618531	5.3356	8.29786	0.00396919	0.0816015
TDRD9	0.730681	4.36661	8.29114	0.00398389	0.0816643
SHARPIN	-0.734354	2.83047	8.29038	0.00398558	0.0816643
KBTBD6	0.579526	4.71082	8.28652	0.00399405	0.0817013
RP11-10J5.1	-1.93054	2.66769	8.26825	0.00403444	0.0823901
POLQ	0.714407	5.11717	8.24627	0.00408359	0.083135
MGLL	0.591652	2.33924	8.24294	0.00409109	0.083135
HLA-DMB	-0.705313	5.69838	8.24146	0.00409442	0.083135
RP1-151F17.2	0.66923	2.04166	8.23985	0.00409806	0.083135
RSRP1	-0.361211	7.79682	8.2275	0.00412603	0.0834286
UBE2D2	0.295736	5.62377	8.22745	0.00412615	0.0834286
CHRM3-AS2	-0.83011	3.57622	8.20985	0.00416636	0.0841009
KIAA1715	0.342315	6.49747	8.20508	0.00417733	0.0841009
COL18A1	-0.711348	2.97672	8.20392	0.00417999	0.0841009
SUN2	-0.393237	6.43634	8.19322	0.00420471	0.0844596
DDAH2	0.545599	5.16263	8.16989	0.00425914	0.0852825
SULF2	-1.03856	4.96484	8.16758	0.00426459	0.0852825
GLS	0.393796	8.54701	8.16233	0.00427695	0.0852825
CCDC149	-0.965967	3.03009	8.16182	0.00427814	0.0852825
NUF2	0.820381	4.01864	8.16083	0.00428048	0.0852825
RALGAPA1P	0.51716	2.91587	8.15037	0.00430524	0.0856365
CDKL1	-0.667369	4.38872	8.14494	0.00431815	0.0857541
RAD51-AS1	-0.349182	2.95143	8.14085	0.0043279	0.0858086
ARID5B	0.400231	7.67207	8.13729	0.00433639	0.0858382
FBXO30	0.310611	6.72885	8.1322	0.00434859	0.0859408
VPS54	0.259231	6.54666	8.12842	0.00435768	0.0859818
IGLC2	1.19094	7.13446	8.12298	0.00437076	0.0861011
VGLL4	0.314746	4.29432	8.11437	0.00439158	0.0863724
EMR3	-1.03136	4.88497	8.0985	0.0044302	0.086918
RCC1	0.495961	4.42398	8.09714	0.00443351	0.086918
ZNF260	0.349746	4.54346	8.09387	0.00444153	0.0869362
LIMS1	0.404541	7.90146	8.08213	0.00447038	0.0873613
SURF4	0.442223	6.28032	8.07415	0.00449012	0.0876074
USP19	-0.396172	5.24066	8.05283	0.00454326	0.0885034
CCRL2	1.09887	6.07322	8.03387	0.00459106	0.0892924
CCDC6	0.396519	5.13627	8.02756	0.00460707	0.0893131
FOXK2	0.263813	4.34686	8.02749	0.00460727	0.0893131
STAT1	-0.590025	9.97528	8.02332	0.00461789	0.0893131
UBE2C	0.87279	3.21249	8.02199	0.00462128	0.0893131
MIAT	0.564485	7.8711	8.01315	0.00464388	0.0896086
MCM10	0.812983	4.049	8.00689	0.00465997	0.0897777
UGDH	0.416431	4.38941	7.99759	0.00468398	0.0900986
ZNF815P	-0.456194	2.41023	7.98413	0.00471892	0.0906284
LINC01268	1.24153	2.0966	7.96638	0.00476541	0.0913781
TRAM2	0.685042	4.36166	7.96176	0.00477759	0.0914101
HIST1H2BL	0.941095	4.20824	7.96009	0.004782	0.0914101
DNAJB6	0.618467	6.83687	7.95513	0.00479513	0.0914192
HIRA	-0.452784	3.13614	7.95371	0.0047989	0.0914192
DENND2C	0.750652	2.38658	7.95146	0.00480486	0.0914192
RP11-1277A3.2	-0.534926	2.80082	7.94568	0.00482024	0.0915696
LY86	-0.592193	3.72849	7.922	0.00488372	0.0925655
PPARG	0.95851	2.70697	7.9205	0.00488778	0.0925655
MBNL2	0.484254	6.17503	7.90763	0.00492267	0.0930825
MT1F	1.01582	1.51934	7.90149	0.0049394	0.093255
CTC-444N24.11	0.42985	4.46226	7.89864	0.00494721	0.0932587
PHACTR1	1.20543	5.86084	7.89555	0.00495566	0.0932745
RBM23	-0.529288	7.32847	7.88467	0.00498557	0.0936936
PDLIM2	-0.581257	2.1281	7.87915	0.0050008	0.0937069
DEF8	-0.540126	5.16337	7.87887	0.00500158	0.0937069
TRAPPC9	-0.448924	4.88877	7.87208	0.00502038	0.0939156
ARG1	1.12768	7.54875	7.8679	0.005032	0.0939896
CTBP1	-0.276231	5.91291	7.86101	0.00505123	0.094205
LINC01138	-0.638928	4.46923	7.85637	0.00506418	0.0943021
DGKE	0.486832	5.18679	7.85365	0.00507183	0.0943021
EIF5	0.256303	7.6664	7.84873	0.00508564	0.0944157
RP4-620F22.2	-1.29032	2.02786	7.84059	0.00510858	0.094646
MT-CYB	1.59033	6.82755	7.83738	0.00511768	0.094646
TNFSF10	-0.778218	9.11787	7.83613	0.00512122	0.094646
FAM96B	0.557314	3.58558	7.82679	0.00514773	0.0949751
METTL5	0.45255	4.18096	7.82441	0.00515453	0.0949751
CCL2	1.71331	1.21811	7.81832	0.00517194	0.0949887
MTFR1	0.414201	3.20222	7.81513	0.00518106	0.0949887
POLR2K	0.645081	4.47684	7.81434	0.00518334	0.0949887
NHSL2	-0.779291	5.01516	7.81331	0.00518628	0.0949887
KIZ	-0.294951	4.81844	7.8078	0.00520212	0.0951366
GPR155	-0.437579	5.92879	7.79984	0.00522507	0.095414
ALDH8A1	0.579966	1.5724	7.78869	0.00525744	0.0957845
RP11-384K6.6	-0.550912	1.83236	7.78747	0.00526099	0.0957845
PSMB10	-0.475889	4.68854	7.76741	0.00531973	0.0967102
DUSP4	1.05247	0.620159	7.75985	0.00534203	0.0969717
TSPAN13	0.488572	4.01092	7.74573	0.00538396	0.0975488
SMC4	0.526417	7.5815	7.74379	0.00538974	0.0975488
UQCRH	0.63641	6.26072	7.72575	0.00544386	0.0983094
RP11-213G2.3	0.424546	3.60251	7.72256	0.00545349	0.0983094
SAR1B	0.270107	6.11012	7.72179	0.00545584	0.0983094
RNF144A	-0.594199	4.07842	7.71635	0.00547229	0.098361
C16orf87	0.455421	4.59975	7.71145	0.00548716	0.098361
RP11-321E2.4	-1.2486	1.80146	7.70856	0.00549596	0.098361
FKBP4	1.05334	6.21546	7.70533	0.0055058	0.098361
CD300LD	-1.48449	1.70841	7.70303	0.00551283	0.098361
IL1B	-0.920136	6.80884	7.70267	0.00551394	0.098361
INSIG2	0.342665	5.88429	7.70235	0.00551489	0.098361
TYMP	-0.59725	6.90787	7.69912	0.00552477	0.098394
TAP2	-0.680758	6.52093	7.69456	0.00553875	0.0984996
ARFGAP2	-0.274652	5.25988	7.69171	0.00554752	0.0985126
MET	0.880187	1.44726	7.68502	0.00556811	0.0985305
MYH3	-0.465755	2.96217	7.68339	0.00557315	0.0985305
PPT1	-0.495536	7.03266	7.68211	0.00557709	0.0985305
CEP55	0.873997	4.80251	7.68095	0.00558069	0.0985305
VPS41	-0.272512	7.46363	7.66831	0.0056199	0.09908
MND1	0.986114	1.969	7.6642	0.00563272	0.0991634
SLAMF7	0.623276	7.91116	7.65843	0.00565077	0.0993385
HBS1L	0.302511	6.97573	7.64511	0.00569265	0.0996756
COTL1	-0.468799	7.02407	7.64408	0.00569589	0.0996756
RP11-50I19.2	-0.657891	2.84875	7.6432	0.00569868	0.0996756
KRT23	-1.11937	6.95961	7.64199	0.00570249	0.0996756
EPHA4	-0.539866	4.15857	7.63545	0.00572322	0.0998955
RALGDS	0.498893	3.86684	7.63168	0.00573519	0.0999621
