# Supplementary material for: Comparative transcriptomic analysis reveals translationally relevant processes in mouse models of malaria
Source: eLife. 2022 Jan 10;11:e70763. doi: 10.7554/eLife.70763 (PMC8747512; doi:10.7554/eLife.70763)
Supplement: Supplementary file 16. [file elife-70763-supp16.xlsx]

## Sheet: Key
Supplementary File 16 The results of the microarray mouse PcAS differential expression analysis
Table Column Names Key
Description: The results of the differential expression Analysis of the microarray PcAS (P. chabaudi AS) dataset comparing early (Day 4) to late (Day 8). The logFC values are given relative to the late timepoint samples.
Gene	Gene Symbols
logFC	log fold change
Pvalue	p-value
FDR	false discovery rate corrected p-value
Tab Names Key
Late-early	The results of the differential expression analysis comparing the late vs. the early timepoints of PcAS infected mice

## Sheet: Late-Early
Gene	logFC	PValue	FDR
Gm239	0.315683	2.09045e-12	6.45302e-08
Ank3	-0.119613	5.7281e-12	8.84103e-08
A230057G18Rik	1.00879	1.62346e-08	0.000159144
Rnf112	0.419144	2.09576e-08	0.000159144
4931403M11Rik	0.528675	2.57773e-08	0.000159144
Shroom3	0.234457	6.86666e-08	0.000353278
Olfr665	0.677895	1.2908e-07	0.000569223
AI451557	-1.42883	3.0523e-07	0.00117777
A630049E09Rik	0.636762	1.75121e-06	0.00600645
Zfp496	-0.598092	3.13114e-06	0.00966551
Lst1	-0.870369	4.16835e-06	0.0116975
Ankrd7	0.400492	5.72361e-06	0.0147235
Smtnl1	1.72303	6.64484e-06	0.0149087
Olfr66	0.414917	6.76155e-06	0.0149087
1700082G03Rik	0.597888	8.00893e-06	0.0161814
Ard1a	-0.329765	8.38714e-06	0.0161814
Fcgr4	-0.919355	9.16073e-06	0.0166343
Cxcl10	-0.372307	1.34043e-05	0.0229876
P2ry5	-0.820131	1.43712e-05	0.0233487
Stat1	-0.881059	1.70713e-05	0.0263487
Ldb1	-0.443513	1.85599e-05	0.0272822
Slamf8	-1.98773	1.97169e-05	0.0276655
Trim30	-1.22156	2.24907e-05	0.0301855
LOC638301	-0.812097	3.04056e-05	0.0343419
Nup205	-0.890654	3.04236e-05	0.0343419
Mast3	-0.355548	3.04744e-05	0.0343419
Ifi47	-1.414	3.1027e-05	0.0343419
LOC640014	0.560019	3.11501e-05	0.0343419
Psmb9	-1.15219	3.25247e-05	0.0346209
H2-D4	0.490546	3.5088e-05	0.0361044
Ly6e	-0.543291	5.25035e-05	0.0522816
Ubap2	-0.438091	6.12211e-05	0.0590573
LOC667370	-1.5997	7.92565e-05	0.0741384
Olfr1437	0.525679	8.74853e-05	0.079429
2310051N18Rik	-0.733563	9.29016e-05	0.0819366
Fbxl14	-0.190525	9.74592e-05	0.0835686
Psmb10	-1.12922	0.000105671	0.0881609
scl0004052.1_76	2.25291	0.000109981	0.0881942
Actc1	-0.573531	0.000111425	0.0881942
Nod1	-0.891489	0.000121853	0.0940373
1520401A03Rik	0.506814	0.000125906	0.0947952
Cstf2	-0.653677	0.000131384	0.096564
Tap2	-0.995957	0.000134919	0.0968562
Muc1	-0.318636	0.000149083	0.104592
Ptprr	0.151521	0.000162147	0.111229
Rps6kb2	0.872112	0.000166918	0.112013
Ifi205	-0.574272	0.000195146	0.128169
2410015N17Rik	-0.937138	0.000215514	0.138598
Irf1	-1.17251	0.000234788	0.144989
Snrpb	-1.03552	0.000234846	0.144989
Rnf213	-1.34671	0.000242815	0.14697
Asb13	-0.559524	0.00024879	0.14769
Fcgr1	-1.26557	0.000254343	0.148138
Srpk1	-0.547909	0.000259611	0.148406
9330155C01Rik	1.78139	0.000282963	0.158814
Dgkd	-0.390288	0.000309962	0.170861
Sulf2	-0.863447	0.00032957	0.176042
Mtap4	0.214974	0.000335955	0.176042
LOC100044582	1.33301	0.000337557	0.176042
Slc12a2	-0.372728	0.000344495	0.176042
9630027A13Rik	2.18982	0.000352107	0.176042
Clspn	-0.505743	0.000353578	0.176042
Wars	-0.816924	0.000391751	0.191952
Crebl1	-0.697909	0.000405966	0.195809
Stac2	0.724727	0.000420434	0.199667
scl0002368.1_75	0.568741	0.000431676	0.2019
LOC100044376	-0.698834	0.000439247	0.202375
Vps36	-0.616327	0.000460822	0.207105
Gbp5	-0.534849	0.000463782	0.207105
Cacna1a	0.381312	0.000473502	0.207105
Mitd1	-0.728692	0.000480768	0.207105
Olfr593	0.55332	0.000483059	0.207105
LOC383196	0.500107	0.000504487	0.213329
Ifit3	-1.24356	0.000512617	0.213837
Zfp264	0.488488	0.00053238	0.216753
Morf4l1	0.220927	0.000542997	0.216753
Fen1	-1.16746	0.00054462	0.216753
LOC100045343	-0.586932	0.000547692	0.216753
Llgl2	-0.681788	0.000562099	0.219639
Ipo9	-0.469556	0.000585393	0.223982
Ace	-0.817947	0.000587728	0.223982
Rfc2	-0.589202	0.000631453	0.236805
Tipin	-0.295578	0.000636716	0.236805
Gadd45g	-1.05855	0.000662262	0.240121
Plcg2	-0.793272	0.000668669	0.240121
Hspd1	-1.19768	0.00066897	0.240121
Cd274	-1.15023	0.000710098	0.251954
Dyrk3	2.17302	0.000719754	0.252478
Cyp27a1	-1.17736	0.000738179	0.256032
LOC100042777	-0.876967	0.000756423	0.259445
Lsm14b	-0.194672	0.000787088	0.266318
Tmbim6	-0.554988	0.000793716	0.266318
Tapbpl	-0.368941	0.000804914	0.266556
Phf17	-0.404867	0.000815136	0.266556
LOC100045999	-0.89235	0.000822276	0.266556
Ildr1	0.394567	0.000828968	0.266556
Noc4l	-0.768065	0.000876948	0.277146
2610003J06Rik	-0.545812	0.000879856	0.277146
Rock1	0.525591	0.00089518	0.278999
A430107D22Rik	-0.193106	0.000905036	0.278999
Rapgef4	0.536025	0.000912954	0.278999
Ppa1	-1.37083	0.000921894	0.278999
LOC100048376	1.08005	0.00095067	0.284915
Atp2a2	-1.15381	0.000975572	0.289567
Sbf1	-0.332593	0.00101831	0.299375
Cct3	-0.519829	0.0010319	0.299565
2810410M20Rik	-0.38927	0.0010417	0.299565
Mrpl40	-0.534871	0.00104807	0.299565
Mpeg1	-0.54157	0.00108066	0.301771
A130092J06Rik	-0.358174	0.00108378	0.301771
E030024L06Rik	1.4952	0.00108512	0.301771
Kcna10	0.26375	0.00116842	0.322035
LOC676704	-0.327727	0.00119726	0.327035
EG623818	1.77907	0.00121607	0.327035
Mmp14	0.359212	0.00121834	0.327035
Mcm4	-0.34273	0.00125319	0.332379
Fdxr	-0.364832	0.00125979	0.332379
LOC100044430	-1.06336	0.00127476	0.333313
Xcl1	-3.18905	0.00128492	0.333313
Bcl6	-0.581538	0.00132934	0.341961
Med19	0.534679	0.00137298	0.349189
Sdcbp2	0.66222	0.00138006	0.349189
Dhx30	-0.330403	0.00142549	0.357751
Olfr270	0.587102	0.00144198	0.357756
LOC547150	0.441431	0.00144868	0.357756
Cma1	-1.19727	0.00146224	0.358236
Mad2l1	-0.54956	0.00148966	0.362081
Plac8	-1.01135	0.0015347	0.369751
1190002H23Rik	-1.00556	0.00154517	0.369751
Sf3b3	-0.726551	0.00158009	0.375197
Lmo4	-0.525717	0.0016012	0.375696
Rin3	-0.769788	0.00160653	0.375696
Prkcd	-0.699055	0.00166057	0.381311
Trmt2a	-0.332148	0.00166462	0.381311
Iigp2	-1.48777	0.0016676	0.381311
Calm3	-0.359008	0.00172977	0.39262
LOC381739	0.714248	0.00175746	0.395992
Trex1	-0.658782	0.00178141	0.39848
Fam102a	-0.42414	0.00181971	0.401839
LOC380955	2.28191	0.00182246	0.401839
Snai3	-0.907056	0.00187125	0.40967
Eef1g	-0.281162	0.00190565	0.411496
Kpna6	1.22759	0.00191098	0.411496
Glce	0.11222	0.00191958	0.411496
Tens1	-1.27806	0.0020195	0.429932
Ly6c1	-0.974122	0.00204393	0.432152
Prdx3	1.23871	0.00210411	0.441849
4631405J19Rik	0.927599	0.00214988	0.44841
Prpf31	1.91992	0.00221918	0.458926
D12Wsu95e	-0.984241	0.00223003	0.458926
Ppih	-0.237903	0.00226957	0.463969
LOC623121	-0.780528	0.00231083	0.465667
Psmb8	-0.660954	0.00231368	0.465667
A430084P05Rik	-0.941781	0.00233597	0.465667
Obfc2a	-0.703811	0.00233821	0.465667
C430014K11Rik	-0.414717	0.00237645	0.46792
Zfp691	0.670582	0.00239247	0.46792
Grik2	0.38596	0.002395	0.46792
Tnfrsf25	-0.578344	0.00245581	0.47381
Clec4a3	-0.386813	0.00245585	0.47381
Rangap1	-0.363609	0.00247652	0.473938
Hsp105	-1.79385	0.00248722	0.473938
2010004M13Rik	-1.35931	0.00251431	0.476162
Itpr3	-0.743843	0.00256714	0.480308
Rhag	2.53078	0.00257457	0.480308
Tbcel	1.17435	0.00259488	0.480308
Atg4c	0.365487	0.00262208	0.480308
Cxcl9	-1.1664	0.00262824	0.480308
Dcakd	-1.17044	0.00262956	0.480308
Txnl4	-0.593298	0.00267234	0.482534
Wfdc6a	0.638693	0.00268906	0.482534
2410004N11Rik	0.976871	0.00269833	0.482534
Sbk	-0.342417	0.00271815	0.482534
A630076G18Rik	0.820007	0.00275694	0.482534
Btaf1	-0.812432	0.00278281	0.482534
Ddx54	-0.182663	0.0027915	0.482534
LOC100047712	-0.993154	0.00279358	0.482534
scl0001259.1_60	0.581822	0.00281119	0.482534
Timm50	-1.06197	0.00281224	0.482534
Zfand6	0.585478	0.00282304	0.482534
Plp1	-2.03321	0.00283767	0.482534
Myd88	-0.998283	0.00284496	0.482534
Zmym2	-0.331964	0.00290613	0.490215
Irf3	-0.438581	0.00293667	0.492674
Gad1	-0.651952	0.00296915	0.495431
Pop5	-0.463758	0.00299083	0.496364
Irf8	-1.58591	0.00302699	0.49968
LOC666904	-1.08775	0.003066	0.501392
Samhd1	-0.882018	0.00306985	0.501392
Sh3bp2	-0.592696	0.00311426	0.504499
Erh	-0.858946	0.00312155	0.504499
Hat1	-0.979257	0.00316681	0.509147
BC062185	-0.518104	0.00323341	0.515608
Bat1a	-0.680663	0.00326956	0.515608
Plagl2	-0.565761	0.00327893	0.515608
Zfp259	-0.384078	0.00328242	0.515608
Chaf1a	-1.41527	0.00329051	0.515608
9030612M13Rik	0.284698	0.00332592	0.518524
Usp42	-0.217568	0.00338069	0.524414
0610030E20Rik	-0.316306	0.00349653	0.535903
Polrmt	-0.7876	0.00351759	0.535903
Sin3b	-0.216326	0.0035524	0.535903
9530007E02Rik	0.359898	0.00356585	0.535903
Gchfr	-1.57409	0.00357982	0.535903
Skiv2l2	-0.627922	0.00359577	0.535903
Stip1	-1.29491	0.00362134	0.535903
Tmem129	-0.308786	0.00362593	0.535903
4631414F19Rik	0.876084	0.00365515	0.535903
Hnrnpab	-0.905229	0.0036552	0.535903
Hist1h4k	-1.62287	0.00365587	0.535903
EG546143	0.741643	0.00366308	0.535903
scl0003955.1_3	0.811048	0.00373633	0.544042
Chtf18	-1.21553	0.00376967	0.546118
Fahd1	0.866776	0.00380131	0.546118
Zap70	-0.675146	0.00380366	0.546118
Bud13	-1.20453	0.00384095	0.548918
Npm3	-0.767912	0.0038782	0.551688
Slc35a4	-0.813463	0.00391688	0.554634
Nol6	-0.31035	0.00395499	0.557473
Uspl1	-0.371123	0.00401752	0.563305
Uck2	-0.792352	0.00403286	0.563305
Srpk3	-0.490674	0.00406978	0.565901
Fignl1	-1.61622	0.00410706	0.568524
Rnf114	1.27185	0.00416248	0.573624
Oas2	-1.38878	0.00420172	0.576458
Cap1	-1.06007	0.00424064	0.576808
Timm8a1	-0.953169	0.00424165	0.576808
LOC100047611	1.09722	0.00427116	0.577843
Enpp4	-1.42023	0.0042867	0.577843
Hmgn2	-0.819571	0.00436567	0.582006
TRBV13-1_M15618_T_cell_receptor_beta_variable_13-1_213	-1.00648	0.00437098	0.582006
Wnk1	0.514893	0.00437414	0.582006
A630084D02Rik	1.03427	0.00444699	0.587919
Unc84b	-0.433322	0.00445667	0.587919
Gng11	-1.57991	0.00459608	0.603729
Psmb3	-0.320267	0.00466884	0.610688
A230046K03Rik	-0.505064	0.00475225	0.618975
Trib2	-0.355783	0.00480614	0.621031
Cdt1	-0.976696	0.00480827	0.621031
Rogdi	-0.575338	0.00486788	0.626111
E330011I20Rik	0.864969	0.00489167	0.626561
Lag3	1.16152	0.00502097	0.635685
C130067A03Rik	0.701258	0.00502361	0.635685
D930028F11Rik	-1.5062	0.00503619	0.635685
Cdca7	-1.47049	0.00506212	0.635685
LOC677008	-1.00123	0.00508175	0.635685
Neu2	1.00189	0.00510883	0.635685
Hist1h4m	-1.12695	0.00511089	0.635685
Eif2ak2	-0.996923	0.00512765	0.635685
Bzw2	-0.672928	0.00517599	0.636897
Stat3	-0.538228	0.00517869	0.636897
Slc16a10	1.54235	0.00521287	0.638556
Fastkd5	-0.443721	0.00523964	0.639298
Klhdc2	-0.336176	0.00530864	0.64257
Ifit2	-1.43367	0.0053106	0.64257
Rrp12	-0.919339	0.00532891	0.64257
Brd2	-0.21013	0.00539399	0.647078
Pold1	-0.834798	0.00540821	0.647078
Abcf2	-0.578618	0.00542929	0.647091
Dhx15	-0.779735	0.0056332	0.668813
Phb2	-0.581962	0.00566255	0.669721
Hmgn1	-0.0978728	0.00569657	0.671173
Tns3	-1.4207	0.00574076	0.673808
Med30	-0.495845	0.00580663	0.677328
A330102K04Rik	2.05859	0.00581464	0.677328
Rpl18	-0.0927986	0.00591153	0.686026
Cct7	0.33388	0.00595572	0.688566
Cd2	0.313027	0.0060469	0.696499
Creld2	-1.14389	0.00612485	0.702855
4933412E12Rik	-1.06885	0.00620092	0.708329
Ercc3	-0.576953	0.00621845	0.708329
Mars2	0.394898	0.00626194	0.710661
Slc25a28	-0.59101	0.00639319	0.718725
Rps13	-0.3137	0.00641152	0.718725
Pou6f1	-0.762549	0.00642066	0.718725
Nek8	0.365671	0.00644662	0.718725
9830169E20Rik	-0.436727	0.00644941	0.718725
Rela	-0.4445	0.00648372	0.719178
Rai3	0.912269	0.00653708	0.719178
Zcchc8	-0.228907	0.00654307	0.719178
Ptbp1	-0.484894	0.00656506	0.719178
Maml2	-0.677763	0.00656996	0.719178
9430065L19Rik	-0.809071	0.00666079	0.724768
Prkd2	-0.21582	0.00671155	0.724768
4933428A15Rik	-1.49348	0.00672583	0.724768
Ramp1	-0.781089	0.00673282	0.724768
Ranbp1	-0.579808	0.00673842	0.724768
Med18	-0.259396	0.00679708	0.728538
D10Wsu52e	-0.487803	0.00687446	0.732884
Serpinb6b	-0.873752	0.00689506	0.732884
Igfbp4	-0.842845	0.00693757	0.732884
Patl1	-0.372605	0.00697718	0.732884
A330042I21Rik	0.773936	0.00698389	0.732884
Il2rb	-1.49413	0.00700119	0.732884
E2f6	-0.460868	0.00701414	0.732884
Snrpf	-0.589283	0.00702963	0.732884
Zfp187	-0.188995	0.0070513	0.732884
Klhl25	0.807424	0.00714998	0.740646
Smpdl3b	-1.39088	0.00720685	0.744041
Rbm5	-0.266023	0.00734462	0.755737
1600016N20Rik	0.47431	0.0074587	0.764925
Cyp2d22	0.202429	0.00748386	0.764964
Clec4a1	-0.60464	0.00753352	0.767499
Zfp207	0.423959	0.00759917	0.77164
LOC100040961	0.466154	0.00764353	0.772313
Ssbp2	0.660516	0.00768873	0.772313
LOC668706	-0.496702	0.0076911	0.772313
Jmjd6	-0.580761	0.00770587	0.772313
D15Mit260	-0.215204	0.00775821	0.772792
LOC638034	-0.780504	0.00777346	0.772792
Zfand3	-1.15097	0.00778575	0.772792
Clecsf9	1.44219	0.00789903	0.780294
Hspa8	-0.844131	0.00791189	0.780294
Tk2	-0.567836	0.00795696	0.781931
B930010D08Rik	0.516528	0.00797914	0.781931
1110014O20Rik	0.382099	0.00801605	0.783062
Ccdc117	-0.470948	0.00807092	0.785934
Prosapip1	0.273215	0.00813725	0.789901
Coq2	-1.09096	0.00823457	0.796843
E230022H04Rik	0.359462	0.0084157	0.810539
Banf1	-0.583523	0.00842862	0.810539
Uhrf1	-0.695258	0.00850599	0.815439
Dom3z	-0.478034	0.00853967	0.816133
1200013B08Rik	-0.287549	0.00857376	0.816862
Brpf1	-0.466415	0.00883096	0.838778
Polr1e	-0.604549	0.00896222	0.848634
Kcnab2	-0.683231	0.00901609	0.851125
Upp1	0.601966	0.00908834	0.852128
Ktelc1	-0.802567	0.00912672	0.852128
Psmc3ip	-1.14999	0.00913569	0.852128
Mrpl23	-0.400167	0.00919154	0.852128
Aof1	-0.12893	0.0091951	0.852128
Smad2	-0.582805	0.00922638	0.852128
9430043O10Rik	0.989936	0.00925759	0.852128
LOC677180	0.68645	0.00932246	0.852128
D19Bwg1357e	-0.837591	0.00933604	0.852128
Lrrn3	-1.2954	0.00934749	0.852128
Churc1	0.392666	0.0093736	0.852128
Cdc14a	0.136451	0.0093879	0.852128
Tcof1	-0.467502	0.00939534	0.852128
Thoc4	-0.714609	0.00944228	0.852128
Ddx11	-0.90215	0.00949973	0.852128
Ssrp1	-0.978198	0.0095209	0.852128
Cd81	-1.01505	0.00952101	0.852128
Zbtb45	-0.722313	0.00953113	0.852128
Mcl1	-0.644203	0.00955121	0.852128
Gpld1	-0.207377	0.00964627	0.858129
LOC100047788	1.97056	0.0097073	0.859684
Gemin4	-0.394584	0.00971946	0.859684
Heca	0.629493	0.00978083	0.862642
Gal3st4	0.886778	0.00982905	0.864424
EG665378	-0.507867	0.00988911	0.867235
LOC100038897	-0.659749	0.00996289	0.871135
5033413D16Rik	-0.876199	0.00999002	0.871135
Cxx1c	-1.85916	0.0100522	0.872598
1190008K20Rik	1.2222	0.0100633	0.872598
Daxx	-0.906001	0.0101172	0.874813
Acadvl	-0.596001	0.010172	0.875032
Asl	0.505684	0.0101867	0.875032
Mcm6	-0.750145	0.0102225	0.875032
Sytl4	-1.64029	0.0102331	0.875032
Mcm10	-0.669699	0.0103678	0.883535
Gltscr2	-0.564651	0.0103898	0.883535
Ebi2	-0.875827	0.010434	0.884856
1500003O03Rik	1.56418	0.0105066	0.887535
E230029C05Rik	-1.21325	0.0105273	0.887535
Ngfrap1	-0.580723	0.0105519	0.887535
LOC233529	1.14871	0.0105822	0.887666
Spire1	0.357859	0.010724	0.895195
4632408O18Rik	0.734242	0.0107299	0.895195
Rbm42	-0.435864	0.0107701	0.896121
2400010C15Rik	-0.86502	0.0108959	0.902319
Mcm2	-1.51172	0.0109163	0.902319
Rrm1	-0.836043	0.0109612	0.902319
Flot2	-0.376765	0.0109615	0.902319
Csk	-0.272521	0.011063	0.906553
Il12rb1	-0.733196	0.0110814	0.906553
Myo1f	-0.597853	0.0111246	0.906553
Sssca1	-0.566549	0.0111746	0.906553
Gtf2f2	-0.630581	0.0111805	0.906553
Ppid	-0.766961	0.0111891	0.906553
Snrpd3	-0.66777	0.0112345	0.90785
Ncf4	1.14931	0.011426	0.914508
Sec23a	1.15631	0.0115102	0.914508
Ogfr	-0.504662	0.0115758	0.914508
Rnu6	0.815502	0.0115976	0.914508
BC006779	-0.514167	0.0116584	0.914508
Hspa9	-0.788421	0.0117387	0.914508
Wipf2	-0.451241	0.0118233	0.914508
IGHV1S123_AF025448_Ig_heavy_variable_1S123_197	0.693923	0.0118545	0.914508
Pgam5	-0.498934	0.0118825	0.914508
Parp14	-0.452343	0.0120516	0.914508
Fhod1	-0.453081	0.0120649	0.914508
Ece1	-0.424833	0.01211	0.914508
3230401L03Rik	0.269706	0.0121374	0.914508
Oasl1	-0.759945	0.0123162	0.914508
Mll3	-0.0920834	0.0123376	0.914508
LOC640972	-1.10445	0.012363	0.914508
Sema4d	0.912219	0.0124081	0.914508
Ryr1	0.535958	0.0124102	0.914508
LOC100048221	-0.51235	0.0124282	0.914508
Kntc1	-1.17582	0.0125166	0.914508
Sfrs15	-0.226377	0.0125318	0.914508
Pdgfa	-1.36586	0.0126157	0.914508
Gpr45	0.586905	0.0127674	0.914508
Phf3	-0.193973	0.0128348	0.914508
9630007E23Rik	-0.172831	0.0128388	0.914508
Exosc10	-0.184762	0.0129485	0.914508
Myo6	-0.690012	0.0129545	0.914508
4930544G11Rik	0.871226	0.0129887	0.914508
Ube2v1	0.906853	0.0130146	0.914508
Ccdc65	0.345986	0.0130292	0.914508
Aldh18a1	-0.623583	0.0130344	0.914508
Serpina3g	-0.868084	0.0130409	0.914508
LOC100048105	-0.367666	0.0130929	0.914508
A130038H09Rik	1.24483	0.0133024	0.914508
Eif3s4	-0.490267	0.0133178	0.914508
Tmem55b	-0.608297	0.0133327	0.914508
Rex3	0.463613	0.0133765	0.914508
Gng5	0.223766	0.0133771	0.914508
5033424B07Rik	0.307226	0.0133792	0.914508
Olfr706	-0.321574	0.0133808	0.914508
Zswim3	0.403869	0.0133918	0.914508
Aire	0.193137	0.0133959	0.914508
Diras2	-1.04285	0.0134076	0.914508
BC038925	0.241634	0.0134201	0.914508
6720458E07Rik	0.382084	0.0134233	0.914508
Atp13a1	-0.711552	0.0134283	0.914508
Ablim2	0.161403	0.0134392	0.914508
Olfr267	0.158904	0.0134702	0.914508
A930025A13Rik	0.291785	0.0134964	0.914508
Brip1	-0.412166	0.0134996	0.914508
A430088A22Rik	0.37525	0.0135094	0.914508
Vps37b	-0.778387	0.0135355	0.914508
Usmg5	-0.264802	0.0135602	0.914508
E330037N20Rik	0.578352	0.0135768	0.914508
6330403K07Rik	0.345019	0.0136358	0.914508
Coro2b	0.126208	0.0136435	0.914508
Olfr242	0.14682	0.0136499	0.914508
Chrna10	0.105068	0.0136653	0.914508
Csf3	0.260791	0.0136815	0.914508
Amt	0.35776	0.0136978	0.914508
Hcfc1	-0.872389	0.0137087	0.914508
Smyd1	-0.357923	0.0137591	0.914508
Fyttd1	0.274404	0.0137879	0.914508
D430044G18Rik	0.236248	0.0137978	0.914508
Rspo3	0.311791	0.013804	0.914508
Abcc2	0.187837	0.0138245	0.914508
Ankrd1	0.137123	0.0138259	0.914508
Gbp10	0.409812	0.0138482	0.914508
EG434171	0.349058	0.0138857	0.914508
Sqstm1	0.888778	0.0138987	0.914508
Mlx	-0.181304	0.0139073	0.914508
Mrps12	-0.620716	0.0139201	0.914508
Dscr6	0.347526	0.0139564	0.914508
scl0003949.1_31	0.507923	0.013989	0.914508
1200016D23Rik	0.319864	0.0139941	0.914508
Scml2	-0.0562114	0.0140072	0.914508
Zfp74	0.247396	0.0140234	0.914508
Pigq	0.97027	0.0140778	0.914508
4930527E20Rik	0.296366	0.0140922	0.914508
Arhgap30	-0.430068	0.0141211	0.914508
Otop3	0.186948	0.0141345	0.914508
Rtdr1	0.315327	0.0141539	0.914508
A830080H07Rik	-0.570937	0.0141602	0.914508
Gm1337	-0.44088	0.0141635	0.914508
Dock3	0.167693	0.0141641	0.914508
D630043K02Rik	0.36785	0.0141867	0.914508
C030026E19Rik	-0.618522	0.0141978	0.914508
Nme1	-0.76707	0.0142072	0.914508
Prkd3	-0.307084	0.0142172	0.914508
4931440F15Rik	0.0925662	0.014219	0.914508
Zc3h7a	-0.590465	0.0142238	0.914508
Klrb1b	-0.231105	0.0142378	0.914508
6820402O18Rik	0.473088	0.0142427	0.914508
Elp2	-0.792074	0.0142446	0.914508
Sox6	0.101639	0.0142707	0.914508
Ptpn6	-0.446411	0.0142904	0.914508
Zfp313	1.42963	0.0143351	0.914508
Slc44a5	0.325252	0.0144102	0.914508
Myh10	0.142884	0.0144411	0.914508
Wdr75	-0.431694	0.0144671	0.914508
Olfr1443	0.150786	0.0144814	0.914508
Nup210	-0.543752	0.0144857	0.914508
LOC333749	0.318671	0.0145352	0.914508
Npr1	0.389528	0.0145513	0.914508
Morc3	-0.294092	0.0145553	0.914508
1110012O05Rik	-1.17137	0.0145849	0.914508
Sf3b5	-0.31525	0.0146074	0.914508
Ibsp	0.0829313	0.014656	0.914508
Ankrd22	0.33006	0.0146623	0.914508
LOC100045677	-1.12646	0.014722	0.914508
1810062O14Rik	0.606182	0.0147421	0.914508
Rfesd	0.748025	0.0147543	0.914508
4921513O20Rik	0.393736	0.0148007	0.914508
C820004B04Rik	0.338177	0.0148016	0.914508
4732483F24Rik	0.334115	0.0148267	0.914508
Csde1	0.472441	0.0148313	0.914508
4930471M23Rik	0.41274	0.0148725	0.914508
Hoxb9	-0.586974	0.0148769	0.914508
Zmat1	0.815473	0.0149106	0.914508
LOC385642	0.248929	0.0149284	0.914508
Gnao1	0.434852	0.0149611	0.914508
Cobl	0.142131	0.0149772	0.914508
Pold3	-0.84119	0.0149868	0.914508
Nkx1-2	0.164346	0.0149905	0.914508
Olfr720	0.488831	0.0150536	0.916178
D230012E17Rik	0.113498	0.0151311	0.916178
6530413F01Rik	0.585314	0.0152139	0.916178
Eef2	0.321523	0.0152437	0.916178
Eif3g	-0.456311	0.0152524	0.916178
Ccdc92	-1.50838	0.0152831	0.916178
Stat2	-1.21443	0.015324	0.916178
E130309D14Rik	0.428893	0.0153277	0.916178
3830430K15Rik	-0.274231	0.0153305	0.916178
1010001D01Rik	0.570084	0.015363	0.916178
Neu4	0.118416	0.015377	0.916178
1700069L16Rik	0.41542	0.0153904	0.916178
Parp6	-0.556801	0.0154052	0.916178
Sfrs2	-0.408409	0.0154334	0.916178
A130087I02Rik	-1.00507	0.0155354	0.920465
Gja5	0.0616093	0.0155997	0.921476
LOC383632	0.605554	0.0156122	0.921476
A430080F05Rik	0.37231	0.0158088	0.922589
F830116E18Rik	0.863132	0.0158515	0.922589
G430055L02Rik	0.37235	0.0158542	0.922589
Rbm8a	0.457801	0.0158556	0.922589
Nup85	-0.749498	0.015946	0.922589
Suz12	0.23504	0.0159816	0.922589
Rdh20	-0.0871094	0.0160214	0.922589
Snrpg	-0.286583	0.0161096	0.922589
Tdrd7	-0.479403	0.0161789	0.922589
Stt3b	-0.738921	0.0162333	0.922589
Ccnd3	-0.679886	0.0162829	0.922589
Sfrs6	-0.39114	0.0163075	0.922589
Faim	-0.646605	0.0163119	0.922589
LOC667388	0.521364	0.01636	0.922589
Mink1	0.304709	0.0163604	0.922589
Ddit4	-0.899221	0.0163625	0.922589
Dmrt2	0.421644	0.0163744	0.922589
Bmper	0.351912	0.01643	0.922589
Arhgap24	0.682878	0.016456	0.922589
Ubqln3	0.210522	0.0164784	0.922589
4930565A21Rik	0.0845647	0.0164849	0.922589
Zfp811	0.380527	0.0164997	0.922589
Paip2b	-0.169504	0.0165346	0.922589
C530044D11Rik	0.907073	0.0165649	0.922589
Rab37	0.235514	0.0165782	0.922589
4933409N07Rik	0.468294	0.0166019	0.922589
C030002B11Rik	-0.281734	0.0166914	0.922589
scl0002824.1_16	0.367731	0.016746	0.922589
LOC385172	0.230194	0.0167722	0.922589
Ctps	-0.637578	0.0167786	0.922589
Mrpl52	-1.43328	0.016792	0.922589
AU021092	-0.217523	0.0168608	0.922589
D030022C03Rik	0.482683	0.0168815	0.922589
2510010F15Rik	1.48624	0.0168875	0.922589
Nip7	-0.113264	0.016897	0.922589
LOC329076	-0.386855	0.0169262	0.922589
Csgalnact2	0.476875	0.0169766	0.922589
6720458F09Rik	-0.739866	0.0170021	0.922589
Mmd	-0.688642	0.0170292	0.922589
Irgb10	-1.24861	0.0170857	0.922589
Jagn1	-0.533792	0.0171087	0.922589
Dnmt1	-0.616938	0.0171273	0.922589
Cxcr6	-0.721015	0.0171344	0.922589
Olfr450	-0.291516	0.017141	0.922589
LOC381730	0.471171	0.0171901	0.922589
Xpo7	1.21767	0.0172038	0.922589
Flt1	-0.72813	0.0172058	0.922589
Slfn1	-0.998157	0.0172079	0.922589
BC004012	-0.589879	0.0172178	0.922589
LOC386321	0.400073	0.0172242	0.922589
Syvn1	-0.411399	0.0172327	0.922589
2700092H06Rik	-0.509785	0.0172378	0.922589
Cd59a	1.16514	0.0172404	0.922589
E330016A19Rik	-0.627077	0.0172449	0.922589
Tigd2	-0.51948	0.0173385	0.923525
Fhad1	0.240989	0.0173424	0.923525
Ergic1	-1.16802	0.0173522	0.923525
Cnnm3	-0.116001	0.0175916	0.933167
Gpr34	-0.147751	0.0176162	0.933167
Ttc13	-0.551632	0.017624	0.933167
Mrto4	-0.91188	0.0177359	0.934276
scl0015365.1_6	-1.39775	0.017781	0.934276
2310061F22Rik	-0.558956	0.0177884	0.934276
Gpr171	-0.642457	0.017799	0.934276
Rnase6	-1.14913	0.0178386	0.934276
Llgl1	-0.516604	0.0178473	0.934276
2610528O22Rik	-0.123151	0.0178568	0.934276
LOC385236	0.368331	0.0180382	0.940718
Mllt3	0.786213	0.0180409	0.940718
LOC100042199	-0.450862	0.0181093	0.941622
1810049O03Rik	0.232846	0.0181684	0.941622
Fads1	-0.797805	0.0182647	0.941622
Mrps34	-0.672183	0.0182875	0.941622
4930486L24Rik	-1.44544	0.0182889	0.941622
D930036B08Rik	0.22432	0.0183051	0.941622
Nnat	0.0591987	0.0183163	0.941622
Dlm1-pending	1.15395	0.018324	0.941622
6430407D20Rik	0.581217	0.0183579	0.941622
Taf15	0.17696	0.0183913	0.941622
Prss34	0.971245	0.0184396	0.941622
Dusp16	-0.278803	0.0184449	0.941622
Hpa	0.231157	0.0184601	0.941622
Rps16	-0.299171	0.0184853	0.941622
Dpm1	-0.125303	0.0185467	0.942219
Edg2	0.380678	0.0185664	0.942219
Lsm4	-0.474407	0.0185886	0.942219
Smo	0.17784	0.0186524	0.943906
St6galnac4	-0.280903	0.0187592	0.946362
Mbnl	0.42243	0.0187623	0.946362
AU021838	-0.654725	0.0188745	0.950469
LOC380878	0.453235	0.0189223	0.951323
Abr	-0.181821	0.0190319	0.953794
Sdhb	-0.535635	0.0190332	0.953794
100041294	0.639818	0.0191729	0.957919
Blm	-0.467028	0.0191776	0.957919
LOC624083	-0.708491	0.0193148	0.960589
Ubl3	-0.608389	0.0193327	0.960589
Gpd2	-0.215555	0.0193742	0.960589
Fastkd2	0.113932	0.0193794	0.960589
Dmap1	-0.764	0.0193867	0.960589
Nol5	-0.427782	0.0196096	0.967867
Gle1	-0.508453	0.0196236	0.967867
Rmnd1	-0.735379	0.0196276	0.967867
2310003P10Rik	0.533108	0.0197237	0.968369
Arhgap17	-0.251962	0.0197419	0.968369
Hap1	0.065952	0.019752	0.968369
Ucp2	0.181922	0.0197633	0.968369
Tnrc6c	-0.381506	0.0198432	0.970745
2010312A17Rik	0.625749	0.0199146	0.971977
Irgm1	-0.660327	0.0199314	0.971977
Batf2	-0.544166	0.0200181	0.97347
Mib2	-0.644381	0.0201079	0.97347
B230312A22Rik	1.2642	0.0201902	0.97347
Gsdmdc1	-0.867805	0.0201981	0.97347
Ints1	-0.802641	0.0202014	0.97347
Tshz1	-0.389437	0.0202538	0.97347
Dap	-1.16156	0.0202717	0.97347
Lsm6	-0.42552	0.0202889	0.97347
Cyld	-0.337147	0.0203128	0.97347
Snrpd1	-0.833336	0.0203252	0.97347
Map3k7ip3	0.361669	0.0203307	0.97347
LOC234187	0.273712	0.0204098	0.97347
Copa	-0.250936	0.0204356	0.97347
Kcnc3	0.381532	0.0204659	0.97347
Smyd5	-0.263889	0.0205052	0.97347
4732488M06Rik	0.765946	0.0205475	0.97347
Urod	1.5814	0.0205763	0.97347
D030049N18Rik	0.514285	0.0205918	0.97347
Tap1	-0.791311	0.0205999	0.97347
Tspan2	-1.36957	0.0206671	0.97347
Tulp4	-0.976858	0.0206936	0.97347
3200001K10Rik	0.749169	0.0207001	0.97347
LOC100041835	-0.743025	0.0207027	0.97347
Adrbk2	-0.736283	0.0207188	0.97347
A430034D21Rik	1.27909	0.02082	0.975905
Zdhhc4	-0.804563	0.0208681	0.975905
Rbm31y	0.235837	0.0208956	0.975905
Ripk1	-0.915466	0.0209078	0.975905
4732442E24Rik	-0.54427	0.0209287	0.975905
2010107H07Rik	1.05246	0.0210382	0.977852
1110038F14Rik	-0.519451	0.0210402	0.977852
Zfp639	-0.39586	0.0210655	0.977852
LOC100047634	0.792225	0.0211063	0.977965
A630077B13Rik	-2.03227	0.0211313	0.977965
D130054A02Rik	0.226951	0.0212326	0.979032
Arhgef18	-0.342599	0.0212405	0.979032
A430093F15Rik	1.09726	0.0212838	0.979032
AA517853	-0.392945	0.0212847	0.979032
Itgb5	-1.15079	0.021313	0.979032
Acot10	-0.219709	0.0213449	0.979041
Tmem44	0.221662	0.021452	0.980198
Vamp1	0.257594	0.0214694	0.980198
Usp39	-0.534771	0.0214787	0.980198
Cacna2d3	1.11334	0.0215457	0.980198
LOC100046578	1.05882	0.0215553	0.980198
Rad23a	1.14123	0.0215606	0.980198
Phactr4	-0.745681	0.0215959	0.980357
Mospd1	0.834385	0.0217374	0.98483
Tbx3	0.279009	0.0217875	0.98483
EG667378	0.201328	0.0217901	0.98483
Nr1h3	0.639131	0.0218812	0.986807
Hbq1	-1.40732	0.0218978	0.986807
2610002M06Rik	1.30279	0.0220248	0.991082
Pomp	-0.761705	0.0221222	0.994018
Pols	-0.717655	0.022203	0.996199
Gmds	-0.686472	0.0222651	0.997239
Tmed9	-0.345799	0.0223139	0.997239
Chrna6	0.105752	0.0224116	0.997239
Dnajb1	-0.847606	0.022438	0.997239
IGKV8-31_AJ235957_Ig_kappa_variable_8-31_3	0.407453	0.0224787	0.997239
A930019L04Rik	0.487532	0.0224868	0.997239
Rtp1	0.0991514	0.0224878	0.997239
Gpaa1	-0.929892	0.0225545	0.997239
Gstt2	0.668623	0.0225572	0.997239
Mthfd1	-0.442786	0.0225778	0.997239
Cnnm1	0.0758208	0.0225815	0.997239
Vars2	-0.440881	0.0226338	0.998119
LOC100047651	0.780672	0.02293	1
Slc35c1	-0.381358	0.0229581	1
Atxn1	0.906796	0.0229602	1
Dus1l	-0.297934	0.0230986	1
Alas1	-0.27226	0.0231114	1
Wwtr1	0.207142	0.0231459	1
Zfp103	0.260119	0.0231509	1
C730026J16	0.509562	0.0231838	1
Slc12a3	-0.178684	0.0231853	1
Olfr724	1.02933	0.023237	1
Supt4h1	0.480527	0.0232426	1
2310024N18Rik	-0.970293	0.0232803	1
Nfkb1	-0.590713	0.0234217	1
Ermap	0.406006	0.0234422	1
Exosc8	-0.718883	0.0234869	1
Eif3s10	-0.286361	0.0235217	1
Hist2h2ac	-0.7126	0.0236412	1
2410146L05Rik	-1.02298	0.0237498	1
Tmcc2	1.40414	0.0237542	1
Ctla2b	-1.30981	0.0237809	1
Sephs2	0.665023	0.0238782	1
Nfkbib	1.23277	0.0238965	1
Prpf4b	0.227196	0.0239881	1
2700094K13Rik	-0.533977	0.0241532	1
Pcgf5	-0.585449	0.0241667	1
Zfp92	0.421549	0.0241724	1
Tec	-0.906251	0.0242482	1
Chst8	0.538827	0.0243269	1
Slc6a18	0.80507	0.0243361	1
LOC665506	-0.334358	0.0243797	1
E230013M07Rik	0.195968	0.0244375	1
Ccdc77	-1.03023	0.0244874	1
4932417H02Rik	-0.120457	0.0246095	1
Atp1b1	-0.840196	0.0246806	1
Nrgn	-1.37267	0.0247344	1
Ccdc85b	-0.273376	0.0247398	1
LOC382436	0.229583	0.0247508	1
Katnb1	-0.198864	0.0248042	1
Litaf	-0.496226	0.0248344	1
Rtn4ip1	-1.17499	0.0248704	1
LOC632667	-0.905997	0.0249539	1
AI480653	0.668226	0.0249663	1
LOC625360	-0.795673	0.0249977	1
AI481316	-0.63041	0.0250068	1
Iqca	0.516204	0.0250891	1
Pdss1	-0.422156	0.0251565	1
Siat9	1.31603	0.0251923	1
Txndc17	-0.177174	0.0252634	1
Chmp2b	0.270662	0.025288	1
Nup160	-0.747869	0.0252983	1
Ptpn14	0.393679	0.0253891	1
Cenpq	0.832367	0.0254422	1
Hk3	-0.376469	0.0254562	1
D16Ertd472e	-0.516021	0.0254712	1
Lemd2	-0.533456	0.0255227	1
Carhsp1	1.08518	0.0255401	1
LOC100039120	-0.260411	0.0255803	1
Ctnnb1	-0.473002	0.0258183	1
Raver2	0.422227	0.0258292	1
LOC382321	0.269307	0.0258433	1
Klrk1	-0.777366	0.025869	1
Zcchc18	-0.217204	0.0258855	1
Rpl3	-0.321986	0.0258866	1
Als2cr4	0.332294	0.0258954	1
Pih1d1	-0.5339	0.025911	1
Mki67ip	-0.724626	0.0260484	1
Rhox1	0.171167	0.0260744	1
Cyp2c54	0.226694	0.0261413	1
Sec14l3	0.239297	0.0261473	1
Rgl3	0.109646	0.0263429	1
Osbp	-0.347684	0.026374	1
Chd6	0.223756	0.0264539	1
Hsf1	-0.392087	0.026455	1
Morc2a	-0.883142	0.0264582	1
LOC208462	0.704051	0.0265373	1
OX2R, GPCR	0.546794	0.0265405	1
Igtp	-0.882007	0.0265612	1
Dtymk	-0.622695	0.0265688	1
Klre1	-1.56686	0.0266136	1
Agpat6	-0.303773	0.026687	1
Polr3b	-0.86038	0.0267129	1
Furin	-0.352211	0.0268015	1
Slc39a4	-0.469927	0.0268029	1
D230004N01Rik	-0.799018	0.026806	1
LOC386254	0.475835	0.0268211	1
Smg7	-0.265863	0.0268307	1
Ormdl3	-0.987535	0.0268415	1
Sec11a	-0.500678	0.0268923	1
Mcm7	-0.725858	0.02695	1
Copb2	-0.305005	0.0269968	1
Rdh5	0.138346	0.0270456	1
LOC384656	0.197756	0.0270599	1
Nmral1	-1.01901	0.0270686	1
Ets2	-0.85364	0.0270699	1
Dpy30	-0.627308	0.0270761	1
0610007P14Rik	-0.607688	0.0270965	1
Parp3	-1.0437	0.0272076	1
Atp6v1e1	0.604023	0.0272536	1
Rdbp	-0.712885	0.0272574	1
Ank	-0.751216	0.0272752	1
LOC100046232	-1.09005	0.0272818	1
Eno3	-1.18285	0.0272991	1
6330505N24Rik	1.20911	0.0273963	1
Rnf40	-0.364181	0.0273995	1
Sh3bgrl2	-1.15035	0.0274077	1
6030458C11Rik	-0.211715	0.0275347	1
Casp1	-0.505528	0.0275665	1
Ddx25	0.651738	0.027593	1
Car12	-0.248805	0.0277186	1
Zfyve19	0.261169	0.0277835	1
C130066B05Rik	0.349916	0.0280659	1
Septin 9	-0.6687	0.0281618	1
Smap2	0.23317	0.0282038	1
4631434O19Rik	0.403551	0.0282345	1
Gcs1	-0.658973	0.0282838	1
Sorcs1	0.103511	0.0283059	1
Hist1h4j	-0.761689	0.0283315	1
Metrn	-1.02556	0.0283857	1
Nat11	-0.467024	0.0284429	1
Ddx24	-0.126023	0.0284842	1
Poldip2	-0.639181	0.028486	1
Mgst3	1.78149	0.0284955	1
Sell	-0.691076	0.0285009	1
4931403I22Rik	0.55633	0.0285039	1
Slu7	0.409346	0.0285184	1
Gramd1b	-0.68941	0.0285593	1
Fbxl17	-0.246141	0.0285653	1
Wdr20a	-0.642406	0.0286486	1
Klk7	0.211079	0.0287459	1
2810458H16Rik	0.119406	0.0287706	1
Bccip	-0.127326	0.0287727	1
Trim23	0.383298	0.02886	1
Narf	0.731017	0.0288866	1
Myd116	1.11093	0.0291108	1
Iars	-0.258142	0.0291796	1
Cyc1	-0.674142	0.0293663	1
Emg1	-0.518116	0.0293749	1
Gins2	-0.612684	0.0293928	1
Mll1	-0.473405	0.0294082	1
scl0001464.1_61	0.578123	0.0294234	1
E130012A19Rik	-0.981922	0.0294994	1
Cldn17	0.213781	0.029535	1
LOC619973	-1.15093	0.0295669	1
Rai16	-0.268441	0.0296003	1
Cdx4	0.283826	0.0297217	1
Tpr	-0.0861062	0.0297825	1
Tcrb-V8.2	-0.406908	0.0297888	1
LOC382102	-0.376305	0.0298397	1
Hsf4	0.292163	0.0298412	1
Gtpbp4	-0.495214	0.0298638	1
A730020L20Rik	0.213937	0.0299617	1
LOC384384	0.793954	0.0299675	1
Ube2h	0.692102	0.0300106	1
Cox10	-0.69024	0.0301478	1
Dach1	0.132724	0.0303437	1
E130001F20Rik	0.659425	0.0303539	1
5330420J21Rik	-0.300886	0.0305108	1
Ela1	-0.457759	0.0305254	1
E430039I23Rik	-0.65752	0.0305373	1
Mtf2	0.44382	0.0307132	1
Mks1	0.614172	0.030894	1
Bcl2l1	1.13989	0.0309002	1
Gpr65	-0.667616	0.0309143	1
D630002J18Rik	0.898208	0.0309872	1
LOC100040885	0.153527	0.0311083	1
Abhd10	0.625955	0.0311541	1
Fnbp4	0.248501	0.0311747	1
Ptprn	0.0691114	0.0312191	1
Epha7	0.0639689	0.0312659	1
Tmem109	-0.668087	0.0313421	1
LOC385681	0.539156	0.0314021	1
Pstpip1	-0.498999	0.0314151	1
Uncx4.1	0.415357	0.031436	1
Cxxc1	-0.247325	0.0314457	1
Cherp	-0.489502	0.0314738	1
Edf1	-0.439841	0.0315932	1
LOC100048803	-0.542588	0.0316797	1
Ccdc99	-0.703182	0.0317278	1
LOC209281	0.822349	0.0318837	1
Chmp6	-0.702994	0.0319048	1
Nup43	-0.703787	0.0320107	1
Prpf3	-0.249393	0.0320801	1
LOC100047368	0.829458	0.0321481	1
9430008C03Rik	-0.387644	0.0322136	1
Tpst1	-0.691973	0.0322453	1
C330002I19Rik	-0.218397	0.032279	1
Gbp3	-1.02918	0.0322915	1
scl0002617.1_582	-1.22733	0.0323142	1
Orc6l	-0.904246	0.0323264	1
LOC675933	-0.264462	0.0323303	1
Nab2	1.36655	0.0323741	1
Mest	-0.57461	0.0324083	1
Wwp2	0.32537	0.0325838	1
Klra33	-0.655814	0.0326478	1
LOC634015	-0.362588	0.0327067	1
Hist1h2be	-0.785472	0.0328478	1
Eif2b3	-0.463816	0.0328558	1
Il12a	0.577488	0.0329103	1
Fkbp14	0.419517	0.0329147	1
Gypc	0.796527	0.0329215	1
Adam24	0.33392	0.0329429	1
LOC331239	0.292924	0.0329491	1
Galnt1	0.874974	0.0329659	1
Cugbp1	0.571436	0.0330039	1
Siva1	-1.06061	0.0330309	1
Golga7	0.696331	0.0330677	1
Tlr7	-0.840668	0.033103	1
LOC640196	-2.01786	0.0332023	1
Olfr538	1.04503	0.0332044	1
Atp5l	0.761553	0.0332217	1
Frmpd4	0.317022	0.0333223	1
Herpud1	-0.449862	0.0333718	1
Mrpl47	-0.334854	0.0333978	1
Olfr376	0.339416	0.0334333	1
H2-Ke6	-0.519374	0.0335381	1
Gtpbp3	-0.448819	0.0335406	1
Lcor	0.918066	0.0336605	1
Fkbp11	0.829158	0.0337004	1
Ccdc130	-0.407556	0.0337043	1
B230380D07Rik	0.229829	0.0337733	1
Map3k7ip2	0.509578	0.0337969	1
Ppp1r10	-0.555861	0.0338004	1
Il18r1	-0.321237	0.0338041	1
Slc12a9	-0.295711	0.0338141	1
Dhx58	-1.0429	0.0338435	1
Aim1	-0.758449	0.0338503	1
Dap3	-0.125891	0.0338699	1
Polr2l	-0.425251	0.0339067	1
Uba1	0.353534	0.0341214	1
Rnf135	0.228925	0.0342058	1
Ppp1r2	-0.369295	0.0343566	1
Impdh2	-0.361808	0.0344213	1
Prei4	0.662674	0.0344513	1
Phf2	-0.462623	0.0344661	1
Nedd9	-0.347207	0.0344763	1
Klhl26	-0.331803	0.0345712	1
Eif4e3	-0.645597	0.0346567	1
Xlr4a	-0.351327	0.0347417	1
Saps1	-0.779916	0.0347602	1
Cwf19l2	-0.39355	0.0349242	1
Ikzf5	0.492972	0.0350936	1
Itgal	-0.648633	0.0351078	1
Trim29	0.354941	0.0351239	1
Tmem185b	-0.340401	0.03531	1
Ctps2	-0.124641	0.0353217	1
Cep152	-0.609842	0.0353254	1
Aldh1a2	0.232973	0.0353471	1
Phf7	0.503981	0.0353583	1
Zfp617	0.163372	0.0353773	1
Rnpepl1	-0.594758	0.0354573	1
Txnl4b	-0.493733	0.0356159	1
Raet1c	0.359018	0.0356338	1
Paqr7	0.534329	0.0356403	1
Sema4b	-0.681379	0.0356425	1
1810055E12Rik	-0.510372	0.0356432	1
Atad3a	-0.513724	0.0356887	1
Zfp276	-0.53755	0.0357738	1
Upb1	0.892102	0.0357791	1
Psmc4	-0.472639	0.035895	1
EG628040	0.327591	0.0359142	1
AA881470	-0.113364	0.0359537	1
Slc25a16	0.182717	0.0361297	1
Add2	0.579787	0.0361464	1
B230312I18Rik	-0.566415	0.0361699	1
LOC625123	0.358084	0.0362168	1
MJ-6000-172_3824	0.523782	0.0362919	1
D12Ertd647e	1.02757	0.0363302	1
Extl3	-0.280127	0.0365795	1
Klra16	-0.714634	0.0366801	1
Rsl1d1	-0.569376	0.0367542	1
Nqo1	0.864531	0.0367993	1
Sfxn1	-0.630705	0.036811	1
Txnrd2	1.17391	0.0369088	1
Tmem192	-0.606063	0.0369926	1
LOC225134	-0.523612	0.0371012	1
LOC638935	-0.932087	0.0371246	1
Havcr2	-0.876866	0.0371638	1
Zfp12	-0.64506	0.0371896	1
1700023F06Rik	0.27431	0.0371986	1
Icosl	0.175112	0.0372565	1
Mrpl50	-0.768084	0.0373057	1
Krtap5-4	0.313854	0.0373888	1
B930011P16Rik	0.45926	0.0374198	1
LOC100044215	0.439653	0.0374658	1
Kremen2	0.70361	0.037586	1
E130306P09Rik	0.509145	0.037695	1
Rabgap1	-0.101224	0.0377338	1
Noc2l	-0.655764	0.0377627	1
Arg1	1.04036	0.0378041	1
Ptpro	-0.506208	0.0378892	1
Gm609	0.437832	0.0379103	1
Atp6v0d1	0.721444	0.0379583	1
Dnase2a	0.646593	0.0379956	1
LOC381249	0.35452	0.0380207	1
Mettl9	-0.422604	0.0380678	1
1700028D13Rik	0.524324	0.03814	1
3000004C01Rik	-0.274985	0.038206	1
Dbr1	-0.508796	0.0382337	1
4930564D15Rik	-0.495946	0.0384112	1
Olfr361	-1.44645	0.0385564	1
D11Bwg0517e	0.106534	0.0385682	1
Gss	0.524276	0.0385912	1
2510049I19Rik	0.534045	0.0386766	1
Rap2ip	1.15512	0.0386919	1
D430043P15Rik	1.44543	0.0386935	1
D130072O21Rik	-0.635189	0.0387373	1
Cdan1	-0.407729	0.0388367	1
4921505C17Rik	-0.157782	0.0388406	1
LOC100042270	0.329666	0.0389422	1
2310004N11Rik	-0.354052	0.0390886	1
Nudc	-0.366474	0.0390942	1
AW540478	-0.721248	0.0392821	1
Ddx6	0.488979	0.039313	1
1200015F23Rik	-0.3876	0.0393957	1
Limk1	-1.01397	0.0394427	1
Spryd4	-0.17928	0.0395329	1
5133401N09Rik	-0.945079	0.0396123	1
Tmem50b	-0.346504	0.0396229	1
2610024G14Rik	-0.538138	0.0396552	1
Zfp263	-0.627188	0.0396655	1
Mycbp2	-0.513127	0.039709	1
Abca3	-0.409205	0.039715	1
Clec2d	-0.697932	0.0398466	1
Slc38a1	0.387263	0.0398824	1
LOC383657	0.235223	0.0399101	1
C130085D15Rik	-0.685552	0.0399206	1
Spnr	0.180346	0.0399679	1
LOC100041230	-0.808782	0.040025	1
Msh6	-0.671013	0.0400429	1
Cdk2ap2	-0.611361	0.0400691	1
Klra3	-1.20424	0.0401126	1
Fkbp4	-0.868467	0.0402003	1
B230369L08Rik	-0.238122	0.0402283	1
9630015E22Rik	0.541839	0.0403793	1
Gyg	-0.632326	0.0403923	1
Sirt3	-0.805419	0.0404487	1
Acaa2	0.534072	0.0404654	1
Ifna6	0.191977	0.0405717	1
Xpa	0.135435	0.0405969	1
Znfx1	-0.318091	0.0406132	1
Tnrc6b	0.434239	0.0407697	1
Sesn2	0.129085	0.0409207	1
Phc2	-0.743812	0.0409427	1
Adar	-0.335911	0.0409546	1
Oasl2	1.36882	0.0409869	1
Eif2ak1	0.982433	0.0410349	1
Pigf	-0.693018	0.0410671	1
Eif5a	-0.36807	0.0410974	1
Prkx	-0.399673	0.0411648	1
Deb1	-0.531189	0.0412001	1
2600001B17Rik	-0.904709	0.0412909	1
Clec5a	0.148246	0.0413032	1
Gemin6	-0.561738	0.0413441	1
Btbd11	-0.351229	0.0413862	1
Fut8	0.349727	0.0413907	1
Fli1	0.695314	0.0415175	1
LOC100043555	-0.125485	0.0415287	1
Tcf7l2	-0.135402	0.0415413	1
LOC100048299	-0.630894	0.0415632	1
Dbp	-1.24174	0.0415927	1
AI256775	0.954906	0.0416294	1
L3mbtl2	-0.568958	0.0416425	1
Slc14a1	0.849425	0.0416488	1
D930033H10Rik	0.531685	0.0417531	1
LOC100040462	-0.115457	0.0417785	1
AI661311	0.510183	0.0417944	1
D17Wsu92e	0.725676	0.041801	1
Hrmt1l2	-0.641184	0.041847	1
LOC384972	0.593322	0.0419068	1
Slc9a1	-0.652377	0.0419398	1
Tcerg1	-0.219743	0.04195	1
2010001H16Rik	0.788461	0.0419523	1
LOC634955	0.755031	0.0420267	1
Zdhhc7	-0.632443	0.0421388	1
Supt5h	-0.289592	0.0421529	1
Rab6	0.392233	0.0422494	1
Aif1	-0.551358	0.0423443	1
Cse1l	-0.809102	0.0423688	1
Sltm	-0.258513	0.042372	1
E130016E03Rik	-0.495913	0.0425385	1
A930005H10Rik	-0.73576	0.0425473	1
Pacs2	-0.877884	0.0425936	1
LOC100045877	-0.325298	0.0426413	1
Tbxa2r	0.501109	0.0429027	1
Klf16	-0.334232	0.0431499	1
1110068E08Rik	-0.61007	0.0431974	1
Rag1ap1	-0.55546	0.0432403	1
Gnaz	-1.12963	0.0432494	1
Slc35a3	0.147603	0.043445	1
Arhgap25	-0.0836595	0.0434763	1
Caprin1	-0.513378	0.0434963	1
Zbtb17	-0.806262	0.0435016	1
Prf1	-1.19967	0.0435309	1
Zfp131	-0.406332	0.0437027	1
Camta1	0.22843	0.0437385	1
3110057O12Rik	0.347723	0.0438005	1
LOC384387	0.248198	0.0438492	1
Iqwd1	1.21724	0.0440434	1
Rab40c	-0.235492	0.0440494	1
LOC232974	0.95357	0.044077	1
Cep350	0.126482	0.0441356	1
Ffar2	-0.727723	0.0441374	1
LOC100042405	-0.554959	0.0441396	1
Glo1	1.01622	0.044151	1
Slc25a10	-1.08428	0.0441769	1
3300001G02Rik	0.428125	0.0441968	1
Tbc1d23	0.669379	0.0442295	1
Zeb1	-0.580066	0.0444547	1
5430417L22Rik	-1.01808	0.0444792	1
Sfrs4	-0.335947	0.044519	1
LOC382608	0.512756	0.0445579	1
Men1	-0.334351	0.0445714	1
Eftud2	-0.457895	0.0446565	1
Mcart1	1.22384	0.0447129	1
Itgae	-0.198555	0.0447179	1
Hrb	-0.563592	0.0447307	1
Tacr1	0.89943	0.0447429	1
Cand1	-0.350764	0.0447453	1
Prkar1a	-0.339244	0.0447885	1
EG546623	0.692134	0.0449068	1
1200015P04Rik	0.531654	0.0449425	1
5730406F04Rik	0.461868	0.0450143	1
Itk	-0.217701	0.045243	1
Ski	-0.349714	0.0453154	1
Phf11	-0.887267	0.0453302	1
E030020A01Rik	-0.686183	0.0454795	1
Pdk3	-0.459087	0.0455818	1
Cyp11b2	0.438079	0.0457137	1
Smad3	-0.747549	0.0457165	1
4632413C10Rik	-0.378616	0.0458401	1
LOC216443	-0.694759	0.0458546	1
Auh	0.239242	0.0459232	1
Pnpo	1.49003	0.0459348	1
Stfa2	0.430064	0.0460383	1
Dscr1	-0.516978	0.0460481	1
Prss3	0.276818	0.0460881	1
Ifi27	-0.976429	0.0461152	1
LOC639001	0.337994	0.0461279	1
Sfrs7	-0.67915	0.046197	1
A430023D23Rik	0.271949	0.0462975	1
Gm459	0.668578	0.0463345	1
A430110M15Rik	0.197769	0.0463423	1
Plcz1	0.376918	0.04646	1
Npm3-ps1	-0.575071	0.0464705	1
Ugcg	-0.344382	0.0464964	1
Ep400	-0.280672	0.0465053	1
Gna-rs1	-0.597517	0.0466299	1
E030049G20Rik	0.181484	0.0467269	1
Kif1b	-0.151092	0.0467492	1
1700023B02Rik	0.824975	0.046757	1
Lat	-0.280969	0.0468263	1
Rfx2	-0.755799	0.0468974	1
St3gal5	1.14901	0.0469243	1
Ard1	-0.390733	0.0471346	1
D430034D15Rik	0.547194	0.0471502	1
Hsp90b1	-0.697609	0.0471815	1
Igh-VJ558	-1.50767	0.0472287	1
Cpm	0.222532	0.0472708	1
Mrps7	-0.554359	0.0474596	1
Pprc1	-0.621373	0.0477	1
1200014J11Rik	-0.609829	0.0478283	1
Thap7	-0.53187	0.0478752	1
Mepe	-0.281656	0.0479648	1
2810407C02Rik	0.640543	0.0479666	1
Nola2	-0.36298	0.0481269	1
Fam125a	-0.707888	0.0483865	1
Gtf3c5	-0.284141	0.0483888	1
Fam162a	-0.836387	0.0483931	1
Sf3a3	-0.4339	0.0484682	1
Nme7	-0.282548	0.0485036	1
C330023M02Rik	-0.47209	0.0485144	1
Unc13c	0.0898371	0.0485445	1
Lrp10	-0.343386	0.0488319	1
Itgb2l	0.146717	0.0490269	1
Sod1	0.286318	0.0490551	1
Septin 6	0.141886	0.0490715	1
Ctcf	-0.371123	0.049097	1
Fyn	-0.156795	0.0491818	1
Pkib	-0.217836	0.0492667	1
Lass2	-0.517615	0.049271	1
LOC240921	-0.599186	0.0497535	1
Gtf3c2	-0.411684	0.0497645	1
Fhl1	-0.696691	0.0497852	1
Ceacam2	-0.487432	0.0499277	1
Psmb1	1.11	0.0499341	1
5830420C15Rik	0.567774	0.0501578	1
scl0001416.1_21	1.01328	0.0501741	1
Alg3	-0.580805	0.0502697	1
Slc15a3	-0.913623	0.0503238	1
Smg6	-0.446751	0.0503495	1
Tfip11	-0.342257	0.0503778	1
Trafd1	0.66144	0.0503952	1
Ccdc56	-0.40727	0.0505673	1
Cstf1	-0.368991	0.0507697	1
Asb1	0.585328	0.0509127	1
0610025P10Rik	0.465152	0.0509455	1
Hist1h4a	-0.726553	0.0510257	1
A630097K09Rik	-0.518288	0.0511392	1
Atf4	-0.618505	0.0512535	1
Axud1	-0.365893	0.0513219	1
4930532M18Rik	0.781868	0.0513947	1
3000003G13Rik	-0.628277	0.051426	1
2310011G17Rik	-0.310878	0.0516274	1
2810405J04Rik	-0.663444	0.0516637	1
Hars	0.3349	0.0518318	1
Pcmtd1	0.64777	0.0519767	1
Cep170	-0.377516	0.0520485	1
Ndrg1	-1.09581	0.0521032	1
Lgmn	1.13985	0.0521278	1
Dusp23	-1.07402	0.0522812	1
LOC630253	0.756976	0.0522984	1
Ttc33	0.778127	0.0523036	1
Thoc2	0.163862	0.0524725	1
Lrrk1	-0.604254	0.0525245	1
LOC669660	0.433741	0.0525602	1
Tmem199	-0.533193	0.0525659	1
LOC100044172	-0.5752	0.0526123	1
6430706D22Rik	-0.680782	0.0526662	1
Xist	-0.425173	0.0527174	1
Pspc1	0.947925	0.0529334	1
Preb	-0.454702	0.0529811	1
D130047A11Rik	0.522754	0.0531023	1
Orc5l	-0.4506	0.0532236	1
Mrpl28	-0.710939	0.0534747	1
Klk8	-0.440404	0.0536096	1
5830431I15Rik	-0.43781	0.0537916	1
3110013H01Rik	-0.70291	0.0538578	1
Laptm4a	0.448324	0.0538958	1
2410001C21Rik	-0.403687	0.0540458	1
Pfkfb2	0.146387	0.0541151	1
Slc43a1	1.36907	0.0541764	1
Zfp574	-0.667146	0.0542552	1
Olfr166	0.307113	0.0543017	1
Set	-0.373463	0.0543502	1
Eraf	1.47875	0.0544125	1
Heatr1	-0.370799	0.0544241	1
Tubg1	-0.858423	0.0546461	1
Zfp809	0.379544	0.0546794	1
Rhoj	-0.842456	0.0546861	1
Hist1h4i	-0.696551	0.0548114	1
C130021K03Rik	0.211772	0.054921	1
Atn1	0.657035	0.0549919	1
LOC100038882	1.29606	0.0550108	1
A130049L09Rik	0.61053	0.055027	1
Birc2	-0.652512	0.0551152	1
Igk-V33	-0.494154	0.055295	1
LOC100038898	-0.538926	0.0553436	1
Mx2	-0.709382	0.0553818	1
Snx11	-0.478893	0.0554207	1
Coq6	-0.290272	0.0558402	1
Tarsl2	0.355832	0.055975	1
Casp8	-0.326618	0.0560459	1
Zmym3	-0.230321	0.0562404	1
Arpc2	-0.821988	0.0562443	1
Trpv6	0.355236	0.0563517	1
Epc1	-0.182887	0.0563827	1
Gngt2	-0.42158	0.0563998	1
Pygb	-0.768177	0.0564584	1
Rap1gap	0.329215	0.0565081	1
LOC100047016	0.284382	0.0566088	1
Eif2c3	0.192378	0.05663	1
Kctd14	0.700365	0.0567393	1
H13	-0.182159	0.0568026	1
Nuak2	-0.692421	0.0568286	1
Phpt1	-0.601616	0.0570063	1
Nol12	-0.404886	0.0570886	1
Cib3	-0.950457	0.057116	1
Pxmp4	0.909788	0.0572624	1
Zcrb1	-0.382037	0.0572836	1
D630048P19Rik	0.445772	0.0573274	1
Pknox2	0.125357	0.0573578	1
Lgals9	0.609103	0.0574344	1
Rexo2	0.489498	0.0574344	1
Mrps26	-0.456008	0.057444	1
Qrich1	0.421402	0.0575228	1
Psmc2	-0.224339	0.0576466	1
Park7	-0.433298	0.057737	1
Btbd12	-0.597743	0.0578393	1
Nedd4l	-0.413333	0.0579895	1
Lu	0.370701	0.0583751	1
Cdkn2c	0.843653	0.0585325	1
Htatip2	0.543925	0.0586035	1
A430042F24Rik	0.468902	0.0586354	1
Il23a	0.170328	0.058768	1
LOC208166	1.29328	0.0590146	1
F730045P10Rik	-0.754875	0.0590282	1
Wdr89	-0.294798	0.0590918	1
Slc19a1	-0.304039	0.0592217	1
EG633692	0.52997	0.0592369	1
Rasa4	-0.153826	0.0592866	1
Icam1	-0.731703	0.0593497	1
2010100O12Rik	0.271662	0.0593685	1
Psmg3	-0.903104	0.0594156	1
LOC100047863	-0.639288	0.0594731	1
Cox6b2	0.794776	0.0594951	1
Tcrg-V4	-1.16482	0.0596128	1
Cops8	-0.417739	0.0598947	1
LOC100044776	-0.401509	0.0599112	1
Slc7a11	0.0613602	0.0599312	1
Zbed4	0.357678	0.0599366	1
Itpk1	-0.426473	0.0599479	1
Rabgef1	-0.777139	0.0599602	1
Trim58	0.151118	0.060097	1
Tmem128	-0.335525	0.0601509	1
Hist1h3f	-0.158653	0.06016	1
Kctd6	-0.280293	0.0601648	1
Pank1	0.2956	0.0603898	1
Prpf8	-0.43673	0.0605591	1
LOC100048461	-0.679675	0.060606	1
Styx	0.0851762	0.0607538	1
Tpcn1	0.551293	0.0607618	1
Gpc1	-1.41867	0.0610652	1
1500001L15Rik	-0.386079	0.0610915	1
Lhx3	-0.0609508	0.0611239	1
2510003D18Rik	0.942288	0.061129	1
Ltb4r1	0.765287	0.0613287	1
D430029G22Rik	0.952529	0.0613792	1
D330027H18Rik	0.787626	0.0613811	1
Gtf3c3	0.295315	0.0614166	1
1500001M20Rik	-0.582561	0.0615943	1
Ints7	-0.747745	0.0616991	1
LOC100046120	-0.787068	0.0617614	1
Dis3l	-0.805924	0.0617638	1
Htr4	0.335889	0.0617965	1
Ppp2r2d	-0.598558	0.0619393	1
Atp5a1	-0.79745	0.0620924	1
2900010M23Rik	-0.636354	0.0623645	1
4930404F20Rik	-0.201761	0.0623824	1
Ttll4	-0.0818136	0.062667	1
Clecsf12	-0.627119	0.0626918	1
4921518A06Rik	-0.177721	0.0627073	1
LOC100048645	-0.601894	0.0627225	1
Ccs	0.734355	0.0628216	1
6330405H19	-1.0701	0.0629281	1
LOC100047827	-0.569613	0.0629598	1
1110007A13Rik	-0.266185	0.0629887	1
Slc46a3	-0.737181	0.0631365	1
Ppp1r1b	0.274424	0.0632575	1
Fut10	0.124284	0.063262	1
Cd109	-0.108676	0.0632995	1
Sap130	-0.770965	0.0633155	1
Rab21	0.403563	0.0633226	1
2510006D16Rik	0.44905	0.0633446	1
Metap2	0.720518	0.0633695	1
Bcap29	-0.489765	0.063396	1
Dnajc27	0.303891	0.0634793	1
4631422C13Rik	-0.177921	0.0634909	1
Atp6v1g1	0.636841	0.0635221	1
3010002L02Rik	0.724724	0.0636791	1
2010003J03Rik	-0.460325	0.0637097	1
Prmt3	-0.544571	0.0639319	1
Tmem209	-0.261576	0.0639339	1
LOC224161	0.454617	0.0641214	1
Tsc22d1	-0.442077	0.0641797	1
LOC100046211	-0.473947	0.0642818	1
Klra20	-0.56857	0.0643192	1
Hist1h2bn	-0.686749	0.0644257	1
Drg2	-0.584297	0.0644608	1
N4bp2	0.316643	0.0648702	1
2310004I03Rik	-0.319844	0.0648855	1
Adcy4	-0.348122	0.0650812	1
Adk	0.536501	0.0651625	1
Triobp	-0.276345	0.0651729	1
Nrap	0.281513	0.0653022	1
Pa2g4	-0.384089	0.0654901	1
Zbtb16	0.517305	0.0655927	1
Fubp1	-0.556014	0.0656171	1
Htr2a	0.212851	0.0656432	1
Car14	0.189621	0.0656973	1
LOC100038894	-1.10915	0.0657107	1
EG633570	0.756218	0.0658502	1
Ahnak2	0.83699	0.0659306	1
Top1	0.926634	0.0659733	1
Fiz1	-0.693052	0.066119	1
Plekhm2	-0.478655	0.0661198	1
scl0004025.1_69	-0.483669	0.066168	1
Hist1h2bk	-0.694185	0.0662656	1
E2f2	1.05467	0.0665891	1
BC027246	0.812101	0.0666611	1
2810432D09Rik	-0.538231	0.0666658	1
Klra2	-0.373619	0.0667521	1
Psmd10	0.480006	0.0667907	1
Ccdc79	0.411526	0.0667933	1
Fes	-0.405966	0.0668019	1
Ncoa5	-0.433802	0.0668062	1
Mrgprg	1.13426	0.06689	1
Eif2b4	-0.360606	0.0669542	1
Mpp1	0.534131	0.0669632	1
Gfer	-0.452696	0.0671503	1
TRBV8_AE000663_T_cell_receptor_beta_variable_8_270	-0.738553	0.0672003	1
Rplp0	-0.241999	0.067227	1
Tcf19	-0.789057	0.0672962	1
1700025G04Rik	-1.40984	0.0673171	1
LOC667034	0.846426	0.0675613	1
Cdc45l	-0.370122	0.0675802	1
Yrdc	-0.47792	0.0675889	1
Wiz	0.0993872	0.0676407	1
A930029B02Rik	0.289275	0.0677389	1
Wasf1	0.37659	0.0679279	1
2510012J08Rik	-0.619392	0.0680843	1
Ly6a	-0.583949	0.0681071	1
Fcho1	-0.140428	0.0681566	1
1700052O22Rik	-0.429747	0.0683772	1
Gtl2	0.272973	0.0683993	1
scl0002315.1_12	0.889374	0.0684408	1
Zfand2a	-0.567855	0.0684528	1
Aspscr1	-0.314144	0.0684742	1
Eif6	-0.605305	0.06855	1
Oas1d	0.658731	0.0686404	1
Sirt7	-0.416452	0.0686904	1
Mrpl9	0.621621	0.0687067	1
Esm1	0.296184	0.0688671	1
Stub1	-0.716523	0.0689687	1
5730589K01Rik	-0.318552	0.0690914	1
Scd1	-0.442059	0.0691902	1
Abcg1	0.694229	0.0692365	1
Apoc2	0.552166	0.0693363	1
Pias4	0.369433	0.0695427	1
Hist1h2bj	-0.668868	0.0696575	1
Brp44	0.3854	0.0698347	1
Man1a	0.667834	0.0698603	1
Cant1	-0.291886	0.0699841	1
Ranbp10	1.08876	0.0700142	1
Zfp667	0.188963	0.0700368	1
Ube2f	0.954566	0.0700988	1
Dvl1	-0.334617	0.0702111	1
Hist1h2bh	-0.588685	0.0702571	1
Cd19	-0.417779	0.0703287	1
scl000408.1_6	0.752692	0.0703343	1
Ndufs4	-0.568158	0.0703577	1
H2-Q5	-0.194794	0.0703872	1
Lcn8	-1.00827	0.0705854	1
Blcap	-0.44523	0.070611	1
Yeats2	-0.178714	0.0707122	1
Hdgfrp2	-0.451148	0.0708826	1
Ctsw	-0.95168	0.0711829	1
Sae1	-0.350644	0.0713015	1
Txndc13	-0.407361	0.0713837	1
Brp16	-0.438236	0.071519	1
Ifi35	-0.785481	0.0715272	1
Rbm13	-0.355857	0.0715629	1
6330509M05Rik	-0.34322	0.0716858	1
Btf3	0.183277	0.071746	1
Mpdz	0.0959515	0.0717588	1
Gpr83	-0.313396	0.0718469	1
3300001P08Rik	-0.283225	0.0718789	1
Plac1l	0.245658	0.071898	1
Myl3	-1.66746	0.0721736	1
Vav2	-0.255018	0.0722152	1
2410166I05Rik	0.197769	0.0722824	1
Bicd2	-0.77119	0.0723339	1
6720487G11Rik	0.174298	0.0726005	1
Gnptg	-0.470284	0.0726634	1
Gstt1	1.05352	0.0728095	1
6720463L11Rik	-0.236823	0.0728794	1
Hrh2	0.201717	0.0729933	1
Itprip	-0.658545	0.0732228	1
BC037034	-0.700919	0.0732786	1
2810455F06Rik	-0.335123	0.0733055	1
Anxa7	0.382994	0.0733353	1
Ccdc101	-0.554906	0.0735042	1
Tufm	-0.553952	0.0735235	1
Add1	0.212551	0.0735479	1
Uchl5	-0.692236	0.0736875	1
Uros	0.472164	0.0738417	1
Cabyr	0.296405	0.0738721	1
LOC100041388	-0.396077	0.0738792	1
LOC100047226	0.521256	0.0739979	1
Immp2l	-1.17301	0.0740792	1
Zranb2	-0.190014	0.0740884	1
Cul4a	0.727139	0.0742503	1
EG433016	1.22209	0.0743337	1
Csnk2a2	-0.547026	0.0744775	1
2010001F03Rik	1.03308	0.0745526	1
LOC100044190	0.426005	0.0746345	1
Tpm1	0.646019	0.0746463	1
1300017J02Rik	1.77572	0.0746536	1
LOC238943	0.645593	0.074665	1
Fars2	0.615529	0.0746732	1
Cyb561d1	-0.246593	0.0748486	1
LOC631302	0.107145	0.0748511	1
Mboat1	-0.293253	0.074855	1
Sdpr	-0.901897	0.0749373	1
Hopx	-0.322376	0.0749712	1
EG627299	0.233361	0.0749902	1
Hoxa13	0.397253	0.0750489	1
2310079P12Rik	-0.611258	0.0751433	1
Nup98	0.173641	0.0752311	1
LOC383293	0.813246	0.0753009	1
Eif4ebp1	-0.920042	0.0754512	1
Oas3	0.780449	0.0754677	1
Tppp3	0.96998	0.0754774	1
Cggbp1	-0.434318	0.0755473	1
scl000554.1_19	0.520249	0.0756882	1
Serpina3f	-1.16728	0.0757239	1
Atp5k	0.353927	0.0759148	1
Fbxo4	-0.36422	0.0760092	1
Rbm38	1.09325	0.0760949	1
D6Wsu176e	-0.313879	0.0762075	1
2310032M22Rik	0.949053	0.0762372	1
Arid5b	0.212697	0.0762605	1
A230050P20Rik	-0.370165	0.0762849	1
B430105G09Rik	0.827057	0.0766406	1
Srm	-0.861732	0.076723	1
Smn1	-0.570424	0.0767395	1
E130118D18Rik	-0.405874	0.0767605	1
Snora65	-0.368793	0.0768089	1
Trim28	-0.454007	0.076832	1
Fubp3	-0.806633	0.0769724	1
F830005D05Rik	-0.725893	0.0771459	1
Pdzrn4	0.0896777	0.0771684	1
Nsun4	-0.591243	0.0772522	1
Mrpl4	-0.645261	0.0775228	1
Rbms2	-0.25982	0.0775588	1
Pip5k1b	0.601432	0.0776177	1
Pak2	0.238342	0.077835	1
D12Ertd553e	-0.582742	0.0779155	1
scl0001032.1_178	0.420818	0.0780128	1
Polr2f	-0.630937	0.0781081	1
Cep63	-0.119929	0.078171	1
Slk	-0.258642	0.0781956	1
Sap30l	-0.585568	0.0783306	1
Spag5	-0.288997	0.0783376	1
Atp2b1	0.83516	0.0783739	1
Pps	0.42981	0.0784261	1
Elmod3	0.371671	0.0784853	1
Vwa5a	0.810881	0.0786422	1
Tnfaip2	-0.63385	0.078702	1
Cmah	0.513441	0.0788321	1
2810030E01Rik	0.349234	0.0788654	1
Trim10	0.965154	0.0788765	1
Lman2l	-0.556791	0.0789845	1
LOC100047155	-0.349021	0.0790965	1
C920004C08Rik	-0.649354	0.0791027	1
Cdkl3	0.555466	0.0791312	1
Nrp1	-0.861996	0.0791576	1
1110007L15Rik	-0.433349	0.0791795	1
LOC218696	-0.420117	0.0792177	1
LOC622404	-0.20702	0.0792691	1
LOC100040244	0.458748	0.0793745	1
Mcoln2	0.623575	0.0793994	1
Rilpl2	0.70551	0.0794005	1
B930006L02Rik	0.684178	0.0794378	1
Chic2	0.470286	0.0795093	1
LOC629763	0.756283	0.0795375	1
4632413K17Rik	0.366041	0.0796047	1
Nars	0.805709	0.0796057	1
6330403M23Rik	-0.564191	0.0796184	1
Helz	-0.443255	0.0796248	1
Pygo2	-0.339807	0.0797538	1
Vmn2r-ps14	0.237597	0.0797737	1
LOC100045404	0.475059	0.0797936	1
Sertad3	0.806665	0.0799051	1
Rgs1	-0.307767	0.0799153	1
Ankrd10	-0.535414	0.0799628	1
Dbil5	0.170269	0.0800304	1
Ogfrl1	-0.272429	0.0800849	1
9430072I10Rik	0.509499	0.0802678	1
Got2	-0.216207	0.0803665	1
Sart1	-0.830643	0.0803667	1
Pola2	-0.525166	0.0806151	1
4930432E11Rik	0.111222	0.0806965	1
Zbtb39	0.447096	0.0807849	1
9626962_211_rc	0.989944	0.0808098	1
Myo7a	0.798423	0.0810622	1
Alas2	-0.359398	0.0810844	1
Ly6g6c	-1.0581	0.0811021	1
Phf5a	-0.295908	0.0811222	1
Sox5	0.259349	0.0813794	1
Ptpn18	-0.745916	0.0814086	1
Mrgpra2	0.957322	0.0814282	1
LOC385843	0.406227	0.0816491	1
Slc25a5	-0.467961	0.0817672	1
5330427M13Rik	0.394986	0.0818036	1
1110001N06Rik	-0.248387	0.0820014	1
Arhgap27	-0.33677	0.0820017	1
Usp24	-0.590425	0.0821677	1
9930024G20Rik	0.546876	0.0822542	1
Apba3	-0.75756	0.0823224	1
LOC381448	-0.336928	0.0825652	1
2210010N04Rik	0.438301	0.0825893	1
5830405N20Rik	-0.749307	0.0825988	1
Atf3	0.416124	0.08269	1
LOC100047490	-0.472761	0.0827385	1
4732469G06Rik	0.435791	0.0827489	1
LOC381776	0.766004	0.0827569	1
Slc13a4	0.511546	0.0827665	1
Ubap1	-0.586207	0.0828039	1
Tkt	-0.081851	0.0828803	1
Trim27	-0.20255	0.0829492	1
Jarid1a	0.116335	0.0830287	1
Ddx19b	0.30738	0.0831621	1
Whsc2	-0.366122	0.0832862	1
LOC382175	0.569085	0.0833316	1
Apob48r	-0.554885	0.0833987	1
Ikbkb	-0.176216	0.0835213	1
Foxm1	0.476034	0.0835866	1
Tmem179b	-0.460734	0.0835892	1
Sirpb1	-0.335782	0.0836294	1
LOC100039227	0.230829	0.0836381	1
Tmem184b	-0.567212	0.0836837	1
2310022K01Rik	-0.433777	0.0838384	1
LOC436541	0.432866	0.0839482	1
LOC235086	0.403455	0.0839779	1
LOC100047316	0.490075	0.0840704	1
Rasgrp4	-0.381431	0.0841451	1
LOC386508	0.689552	0.084227	1
Nup62	-0.544008	0.0843838	1
C230096K16Rik	0.612212	0.0846267	1
Tg	0.771178	0.0846754	1
Ahdc1	-0.451676	0.0846756	1
2210023G05Rik	0.777155	0.084838	1
Icmt	-0.273563	0.0849217	1
1110038D17Rik	0.0978856	0.0850068	1
8430419L09Rik	0.745944	0.0850489	1
Ccdc86	-0.668704	0.0850805	1
LOC623006	-0.53451	0.0851031	1
Omp	0.362329	0.0851143	1
Zfp35	0.423493	0.0851223	1
Sfrs5	0.417997	0.0851738	1
Edc4	-0.793114	0.0856908	1
Faf1	-0.155025	0.0857822	1
Hax1	0.866457	0.0858646	1
Fbxo9	0.945368	0.0859041	1
Ccbp2	0.758295	0.085925	1
Eif4a3	-0.437662	0.0859429	1
Osgep	-0.38289	0.085979	1
Xylt1	0.302657	0.0861269	1
Mrps30	-0.29343	0.0861883	1
Gpr174	0.323993	0.0861955	1
Mrps9	-0.426858	0.0862293	1
Tsc22d2	-0.31989	0.0862335	1
A430107N12Rik	-0.301647	0.0867662	1
Hist1h2af	-0.564444	0.0867819	1
LOC100041864	-0.337009	0.0867951	1
Wdr43	-0.27924	0.0869256	1
Gm960	0.894133	0.0870731	1
Itga5	0.247932	0.0872921	1
Ndufa7	0.461632	0.0874902	1
Hist2h2aa1	-0.590351	0.0876622	1
Txndc5	-0.468313	0.0876894	1
Tmod1	1.49343	0.0877728	1
Ccr6	0.557098	0.087777	1
D430035B07Rik	0.48031	0.0878628	1
LOC100041500	-0.418868	0.0880498	1
LOC665047	0.403093	0.0880526	1
Car5b	-0.190527	0.0880755	1
Pparbp	0.477018	0.0881053	1
Lama4	0.0346375	0.0883147	1
LOC100040573	-0.0781476	0.0884298	1
LOC100048187	-0.295458	0.0885004	1
Dstn	0.634429	0.0885381	1
Camta2	-0.515849	0.0886508	1
Mcm5	-0.767614	0.0887524	1
Rchy1	0.679302	0.088882	1
1110033C18Rik	0.908505	0.0889945	1
Usp10	0.379016	0.0890074	1
Jtv1	-0.524391	0.0891603	1
Klra4	-0.5923	0.0892804	1
Zmynd11	0.393797	0.0893225	1
LOC384104	-0.675467	0.0895333	1
Plk2	0.602555	0.089608	1
Serbp1	-0.364347	0.0896197	1
Trim33	0.223044	0.0896912	1
Il27	-0.391697	0.0897101	1
1810063B05Rik	-0.608295	0.0899308	1
BC031181	-0.47544	0.0899477	1
Fbxw2	0.451739	0.0900086	1
Pmaip1	0.198076	0.0901966	1
Dnclc1	-0.618466	0.0902031	1
LOC100047385	-0.449431	0.0904121	1
1700127G21Rik	0.413419	0.09048	1
Prrc1	-0.542454	0.0905109	1
Acsl1	1.00514	0.0905699	1
LOC100046469	-0.224268	0.0906779	1
Gak	-0.165059	0.0907597	1
Cbr2	1.12272	0.0909377	1
Piga	-0.215755	0.0911844	1
Zeb2	-0.167718	0.0912128	1
2310014B11Rik	1.12944	0.0912811	1
Nup93	-0.69468	0.0912843	1
Taf12	-0.284775	0.0913969	1
Rpl12	-0.188698	0.0915006	1
Prpf38a	-0.271955	0.0915021	1
Rps27a	-0.390918	0.0916316	1
Cep78	0.901639	0.0916543	1
Foxn3	0.378605	0.0918604	1
Psip1	-0.135981	0.0918799	1
2610015J01Rik	0.450945	0.0919077	1
1810063B07Rik	-0.484407	0.0920224	1
D14Ertd668e	-0.525527	0.0921395	1
Lsm10	-0.38296	0.0921989	1
E2f4	-0.551564	0.0922087	1
Pou2f2	-0.579638	0.0923283	1
8430415N23Rik	0.443214	0.0924166	1
Gadd45a	0.956991	0.0926315	1
Pik3cb	-0.939827	0.0926767	1
Zfp281	-0.364129	0.0927069	1
Arl8b	-0.418275	0.0927106	1
Map2k4	-0.396527	0.0927449	1
Mmp1a	0.358391	0.0928743	1
Gtf3c4	0.209162	0.093052	1
Kat2b	0.350252	0.0930527	1
LOC100048076	-0.237259	0.0930542	1
5530400B01Rik	0.608278	0.0931842	1
Pcmt1	-0.589622	0.0933125	1
Cd7	-0.537121	0.0934964	1
Nt5c3	0.991625	0.0935967	1
Panx1	-0.371404	0.0937814	1
D930024N12Rik	0.535473	0.0938487	1
LOC381691	0.315204	0.0939012	1
Ppp4c	-0.51128	0.0940222	1
Ttc3	-0.169841	0.09407	1
Gins4	-0.425295	0.0941362	1
3110001P07Rik	-0.262281	0.0941868	1
Abi3	-0.384697	0.0942079	1
Anln	-0.26286	0.0942354	1
A930024K11Rik	0.445448	0.0943093	1
Nid1	0.67655	0.094321	1
Arhgap1	-0.292394	0.0943664	1
2410129H14Rik	0.256524	0.0944281	1
Fbxw17	-0.80054	0.0944444	1
Pscd1	-0.305466	0.0944953	1
Acot7	-0.715812	0.0945104	1
Ttc17	-0.396996	0.0945208	1
Nudt6	-0.515742	0.0946404	1
Dnttip1	0.437501	0.094758	1
Jund1	0.474681	0.0948339	1
Rusc1	0.264598	0.0948436	1
LOC276837	-0.730718	0.0951285	1
8030474H12Rik	0.478165	0.0951709	1
Riok1	-0.230062	0.0952167	1
Prmt5	-0.44492	0.0952292	1
BC017612	-0.458014	0.0952778	1
Prnp	0.850424	0.0953106	1
Lmf1	-0.671105	0.0953291	1
4932410M19Rik	0.380029	0.0954322	1
Klra7	-0.755095	0.0954475	1
Kctd20	0.575629	0.095526	1
Ankrd35	-0.321705	0.095613	1
LOC676222	0.0976641	0.0956275	1
Ninj2	0.396515	0.0956504	1
2410006H16Rik	0.239941	0.0957359	1
Rft1	0.344339	0.0957644	1
Ap1b1	-0.311294	0.0958321	1
2400010D15Rik	1.02763	0.0958396	1
Ear2	-0.802604	0.0959103	1
Rnf123	1.11265	0.0959353	1
0610010K06Rik	-0.316855	0.096016	1
Eed	-0.580426	0.0960604	1
BC057627	-0.457652	0.0961708	1
LOC621823	-0.526919	0.0961802	1
Nptn	-0.863834	0.0962014	1
Herc1	0.0839149	0.0962399	1
Csf2rb	0.261135	0.096523	1
Nfkbid	-0.451375	0.096594	1
LOC100046792	0.493792	0.0966072	1
Arl4a	0.54501	0.0966317	1
Supt6h	-0.447452	0.096801	1
Ppox	0.634292	0.0970663	1
Snx30	0.552136	0.0971034	1
Socs5	0.210808	0.0971895	1
F830004M19Rik	0.850077	0.0972313	1
Rnps1	-0.289102	0.0974793	1
Asb3	0.389019	0.0975498	1
Rpp21	-0.268879	0.0976536	1
C130065N10Rik	0.471514	0.0976758	1
Ero1lb	0.419196	0.0977306	1
LOC632230	-0.440659	0.0980365	1
Gpr172b	-0.209825	0.0980657	1
Tmem176b	-1.17049	0.0981268	1
Tnfrsf22	0.153801	0.0982518	1
Fndc3b	0.931675	0.0984771	1
2810402K13Rik	0.640193	0.0985176	1
Eif4g1	-0.454275	0.0986951	1
B230205O20Rik	0.614903	0.0988988	1
C87436	-0.412976	0.0990216	1
Evl	-0.517391	0.0991976	1
Arpc1b	-0.300606	0.0993829	1
LOC627317	0.724585	0.0994905	1
9626958_317	-0.555382	0.0995939	1
Slc22a7	0.556389	0.0997454	1
Tgfbrap1	-0.190908	0.0997694	1
C530008M17Rik	-0.790482	0.0997937	1
Ythdf1	-0.55499	0.0998147	1
LOC381774	0.274806	0.0998392	1
Tmem86b	1.16257	0.0998495	1
LOC100044829	-0.510235	0.0998878	1
Rgs10	-0.828084	0.100058	1
Fin14	0.265293	0.10011	1
4933404M02Rik	-1.26954	0.100243	1
EG664849	0.685107	0.100271	1
LOC381255	0.568529	0.100364	1
Uqcrh	0.548253	0.100407	1
Itpr2	-0.210425	0.100429	1
Acyp2	0.344733	0.10043	1
Irf6	0.211578	0.10048	1
LOC100046923	0.716066	0.100717	1
Pbk	-0.916217	0.100732	1
Dcun1d5	-0.495214	0.100769	1
LOC627985	-0.37355	0.100797	1
Nbr1	0.659282	0.100831	1
Pde7a	0.525806	0.100882	1
Fosl2	-0.212415	0.100925	1
Klra13	-0.743764	0.100948	1
Rnf145	0.387585	0.100982	1
Hist1h4f	-0.755721	0.10111	1
Abca14	0.145974	0.101116	1
Wsb1	-0.251385	0.10129	1
Exdl2	-0.459202	0.101306	1
scl0002007.1_97	-0.456499	0.101356	1
Cfd	1.13681	0.101547	1
Arhgef11	-0.502951	0.10155	1
4930522L14Rik	0.446146	0.101553	1
Cnot1	0.197905	0.10158	1
Stk3	0.311171	0.101741	1
C230055K21Rik	0.459698	0.10175	1
LOC100047167	-0.513304	0.101827	1
1810037O03Rik	0.652097	0.101875	1
2010005H15Rik	1.53144	0.101956	1
BC050811	0.208152	0.101972	1
LOC433749	0.094918	0.102106	1
Med23	-0.446212	0.102143	1
2610010G17Rik	0.522322	0.102181	1
Uvrag	-0.311407	0.102184	1
Amdhd1	0.525822	0.102241	1
Zfp236	-0.282431	0.102306	1
Apoe	-1.02009	0.102321	1
LOC669166	0.81411	0.102408	1
Tmem68	-0.494623	0.102424	1
Ywhaq	-1.00786	0.102594	1
Rab18	0.353815	0.102647	1
1110028F11Rik	-0.775458	0.102847	1
Slc44a2	-0.486536	0.102868	1
Pold2	-0.839718	0.103086	1
Fyb	-0.363337	0.103206	1
Mettl1	-0.428313	0.103217	1
Ptcd2	0.259432	0.103371	1
Ung	-0.19706	0.103433	1
Rae1	-0.41624	0.103525	1
Gypa	1.06911	0.103596	1
Minpp1	0.132275	0.103642	1
Bat2	-0.428382	0.103732	1
E430021E22Rik	0.937881	0.103884	1
LOC380801	0.654191	0.103889	1
A930014I12Rik	0.25048	0.103904	1
A730094H17Rik	-0.538858	0.103973	1
Kcne1	0.135262	0.103977	1
Cldn9	0.845307	0.104139	1
Otub2	0.320443	0.104142	1
C230080E09Rik	0.296021	0.104181	1
LOC668978	0.454299	0.104211	1
Tlk1	-0.48452	0.10423	1
Ctsr	0.56669	0.10424	1
LOC268288	-1.12598	0.104253	1
LOC230143	0.393755	0.10434	1
Tceb3	-0.522605	0.104342	1
2610524G07Rik	0.701107	0.1044	1
Hspa5	-0.621695	0.104455	1
Ruvbl2	-0.790012	0.104523	1
F730023C13Rik	0.688409	0.104555	1
Ate1	-0.181523	0.104596	1
Vcp	0.443419	0.104644	1
4833420G17Rik	0.381033	0.104886	1
Cpsf6	0.365981	0.104978	1
IGKV4-71_AJ231218_Ig_kappa_variable_4-71_20	0.452121	0.104984	1
Immt	-0.0975805	0.105123	1
Napsa	-0.414044	0.105229	1
D9Ertd280e	0.676103	0.105294	1
D330004F16Rik	0.549945	0.105318	1
A130015P11Rik	-0.842321	0.105339	1
Cdca3	-0.474232	0.105527	1
Rab35	-0.394399	0.105592	1
A130062D16Rik	-0.376801	0.105658	1
Glt25d1	-0.615068	0.105664	1
EG632248	-0.711046	0.105677	1
Bxdc1	-0.375469	0.10577	1
Med16	0.220558	0.105872	1
A730017D01Rik	0.863826	0.105953	1
Ubac2	-0.316823	0.105983	1
A730062O07Rik	-0.512933	0.106014	1
Ezh2	-0.201353	0.106078	1
Tmem126b	0.55901	0.106125	1
LOC666025	0.357437	0.106157	1
Chchd1	-0.421129	0.106195	1
1110001J03Rik	-0.612452	0.106207	1
Atp6v1a	0.871771	0.106358	1
4632434I11Rik	0.515867	0.106373	1
Klf1	0.649653	0.106435	1
6030448M23Rik	0.577051	0.106523	1
Cenpl	-0.513243	0.106548	1
Arhgdib	-0.164609	0.106557	1
Clns1a	-0.19718	0.106601	1
Zmat5	-0.409646	0.106653	1
Art2b	-0.938414	0.106692	1
Ensa	-0.185101	0.106803	1
LOC386205	0.381588	0.106822	1
Ndufb4	-0.282619	0.106928	1
F630001K14Rik	0.972001	0.107288	1
6330500D04Rik	0.261898	0.107527	1
3110050L10Rik	0.347331	0.107537	1
Gcnt2	-0.116814	0.10762	1
Bcl2	-0.495303	0.107633	1
Ywhab	-0.442256	0.10771	1
Acd	-0.159426	0.107804	1
Cenpm	-0.1463	0.107849	1
Col11a1	0.141266	0.108024	1
EG240327	0.371308	0.108033	1
Cops6	-0.484626	0.108088	1
Tmem43	-0.443792	0.108127	1
0610006I08Rik	-0.393326	0.108234	1
Hnrph1	0.691535	0.108289	1
2010009J12Rik	0.353387	0.108371	1
Chst7	0.755805	0.108412	1
1110002D22Rik	-0.470037	0.108456	1
Trip12	0.359416	0.10863	1
Fgl2	-0.722688	0.108636	1
Mxd4	0.52414	0.108717	1
2810452K22Rik	-0.238516	0.108717	1
Orai1	-0.458559	0.108761	1
Setd7	-0.192987	0.108903	1
LOC100043671	-0.917784	0.108928	1
Marco	0.881262	0.108932	1
LOC100045782	-0.353618	0.108959	1
4930564D02Rik	-0.493919	0.108969	1
Ppp2r5d	-0.326014	0.109037	1
Tcap	-0.500152	0.109049	1
C230071H18Rik	0.512604	0.109124	1
Gpr141	-0.42111	0.10921	1
Cd80	0.338205	0.10925	1
Cacna1s	0.502716	0.109419	1
LOC100047184	-0.419755	0.109499	1
Ide	0.448813	0.109733	1
Zfp288	0.417392	0.109773	1
Jmjd2b	-0.149932	0.109783	1
5830457O10Rik	-0.362233	0.109914	1
Trak2	0.892677	0.109918	1
LOC668631	-0.554686	0.109975	1
scl0002975.1_346	0.518559	0.110104	1
Gpbp1l1	0.576793	0.110104	1
B230120H23Rik	0.142693	0.110124	1
Eif4a1	-0.417066	0.110179	1
LOC100046039	-0.130853	0.110202	1
Emb	-0.192433	0.110413	1
Nubp2	-0.36617	0.11043	1
LOC624662	-0.292083	0.110561	1
Akap8l	-0.507983	0.110635	1
Pcif1	-0.409411	0.110666	1
Gnpda1	0.601977	0.110702	1
E330022B15Rik	0.755475	0.110738	1
Ovol2	0.566986	0.110788	1
6330581N18Rik	0.563811	0.110859	1
Tspan32	0.178375	0.110912	1
Acsl5	-0.174008	0.111034	1
1810022K09Rik	-0.435245	0.111036	1
Psmd13	-0.450382	0.11113	1
Dnajb6	0.614585	0.111131	1
LOC100039786	-0.535356	0.111282	1
B020018G12Rik	-0.488482	0.111352	1
Btbd1	-0.151752	0.11136	1
P2ry6	-1.03705	0.111588	1
Dut	-0.314906	0.111618	1
Tusc1	-0.50193	0.111703	1
Trim11	-0.366755	0.111747	1
Theg	0.285319	0.111818	1
Armcx2	-0.650972	0.111832	1
Klra10	-1.06087	0.111885	1
C130072A16Rik	0.556164	0.111905	1
Slc4a2	-0.485948	0.112103	1
Malt1	-0.230133	0.112131	1
AI850995	-0.604474	0.112154	1
Srpk2	0.312203	0.112194	1
2310003H01Rik	-0.627337	0.112208	1
Cd3e	-0.396072	0.112241	1
D730006F06Rik	0.446727	0.11228	1
Chd8	-0.329752	0.112319	1
1110049F12Rik	0.666924	0.112341	1
Rab8a	-0.455009	0.112382	1
1810046J19Rik	-0.278242	0.112421	1
Mapk8	0.299621	0.11245	1
Fzd5	-0.168289	0.112503	1
Thumpd1	-0.185653	0.112954	1
Twist1	0.381277	0.11302	1
Plekhj1	0.313117	0.113047	1
Ctsc	-0.43622	0.113119	1
Fbxo40	-0.0467305	0.11312	1
Ndufa11	0.569198	0.113363	1
Mtr	0.236801	0.113475	1
Gins1	-0.628095	0.11361	1
LOC236060	0.535222	0.113669	1
Sdhc	-0.143941	0.113755	1
Slc25a11	-0.31094	0.113792	1
Wdr40a	-0.735096	0.113841	1
Clic4	-0.603918	0.113868	1
Hal	0.46416	0.114003	1
Adssl1	-0.43264	0.114087	1
Ibtk	0.268657	0.114222	1
Wdr51b	0.187283	0.114512	1
Nudt14	0.378021	0.114529	1
[truncated: 28,870 more rows]
