# Supplementary material for: Comparative transcriptomic analysis reveals translationally relevant processes in mouse models of malaria
Source: eLife. 2022 Jan 10;11:e70763. doi: 10.7554/eLife.70763 (PMC8747512; doi:10.7554/eLife.70763)
Supplement: Supplementary file 18. [file elife-70763-supp18.xlsx]

## Sheet: Key
Supplementary File 18 RNA-Seq Mouse Raw Counts
Raw count data for the mouse RNA-Seq dataset.

## Sheet: murine_mm
Ensembl Gene ID Version	Control1_AG003	Control2_AG003	Control4_AG004	NK65_M1	NK65_M11	NK65_M12	NK65_M14	NK65_M3	NK65_M5	PbANKA_M1	PbANKA_M10	PbANKA_M2	PbANKA_M5	PbANKA_M6	PbANKA_M9	PcAS_M1	PcAS_M10	PcAS_M4	PcAS_M5	PcAS_M8	PcAS_M9	Py17XL_M10	Py17XL_M2	Py17XL_M4	Py17XL_M5	Py17XL_M7	Py17XL_M9	PyNL_M2	PyNL_M3	PyNL_M4	PyNL_M7	PyNL_M8	PyNL_M9
ENSMUSG00000112020.1	0	0	0	0	0	0	0	0	0	0	0	0	0	0	0	0	0	0	0	0	0	0	0	0	0	0	0	0	0	0	0	0	0
ENSMUSG00000107164.1	0	0	0	0	0	0	0	0	0	0	2	0	0	0	0	0	0	0	0	0	0	0	0	0	0	0	0	0	0	0	0	0	0
ENSMUSG00000100198.1	0	0	0	0	0	0	0	0	0	0	0	0	0	0	0	0	0	0	0	0	0	0	0	0	0	0	0	0	0	0	0	0	0
ENSMUSG00000002413.15	95	490	477	40	64	67	198	70	53	84	106	41	67	17	25	119	149	140	243	89	115	17	119	69	227	49	47	55	32	99	77	66	88
ENSMUSG00000047534.17	14	9	0	1	0	9	212	48	39	22	169	23	10	3	6	39	43	1	28	31	38	1	11	30	46	17	10	26	9	21	21	45	3
ENSMUSG00000059303.6	0	0	0	0	0	0	0	0	0	0	0	0	0	0	0	0	0	0	0	0	0	0	0	0	0	0	0	0	0	0	0	0	0
ENSMUSG00000101416.1	0	0	0	0	0	0	0	0	0	0	0	0	0	0	0	0	0	0	0	0	0	0	0	0	0	0	0	0	0	0	0	0	0
ENSMUSG00000099224.1	0	0	0	0	0	0	0	0	0	0	0	0	0	0	0	0	0	0	0	0	0	0	0	0	0	0	0	0	0	0	0	0	0
ENSMUSG00000034820.3	172	456	818	35	16	30	564	178	140	92	423	89	32	18	54	144	322	94	196	123	100	34	165	178	234	98	103	59	52	119	94	65	30
ENSMUSG00000087282.1	0	0	0	0	0	0	0	0	0	0	0	0	0	0	0	0	0	0	0	0	0	0	0	0	0	0	0	0	0	0	0	0	0
ENSMUSG00000110686.1	1	1	1	1	3	1	13	4	1	2	2	1	0	0	1	0	1	3	4	1	1	1	1	1	3	2	0	0	0	0	6	1	1
ENSMUSG00000092258.2	0	0	0	0	0	0	0	0	0	0	0	0	0	0	0	0	0	0	0	0	0	0	0	0	0	0	0	0	0	0	0	0	0
ENSMUSG00000111904.1	0	0	0	0	0	1	0	0	1	1	0	0	0	0	0	0	0	0	0	0	1	0	0	0	0	0	0	0	0	6	0	0	0
ENSMUSG00000005583.16	579	2262	2492	50	55	182	426	198	179	118	137	139	100	35	66	424	966	794	989	357	379	80	359	216	1243	227	115	184	133	282	232	200	133
ENSMUSG00000088500.1	0	0	0	0	0	0	0	0	0	0	0	0	0	0	0	0	0	0	0	0	0	0	0	0	0	0	0	0	0	0	0	0	0
ENSMUSG00000081534.2	8684	16539	9841	2577	4915	8060	7313	1375	716	172	1455	316	1538	35	82	6489	8545	19405	12232	10409	8170	93	968	268	8681	220	204	5525	2939	4231	10691	10243	9624
ENSMUSG00000097770.1	0	0	0	0	0	0	0	0	0	0	0	0	0	0	0	0	0	0	0	0	0	0	0	0	0	0	0	0	0	0	0	0	0
ENSMUSG00000115269.1	0	0	0	0	0	0	0	0	0	0	0	0	0	0	0	0	0	0	0	0	0	0	0	0	0	0	0	0	0	0	0	0	0
ENSMUSG00000113332.1	0	0	0	0	0	0	0	0	0	0	0	0	0	0	0	0	0	0	0	0	0	0	0	0	0	0	0	0	0	0	0	0	0
ENSMUSG00000086117.1	0	0	0	0	0	0	0	0	0	0	0	0	0	0	0	1	0	0	0	0	0	0	0	0	5	1	0	0	0	0	0	0	0
ENSMUSG00000027363.15	165	740	782	143	116	129	735	235	109	276	233	138	57	46	74	298	352	226	392	271	260	34	375	319	548	221	170	175	106	183	176	206	168
ENSMUSG00000101390.1	0	0	0	0	0	0	0	0	0	0	0	0	0	0	0	0	0	0	0	0	0	0	0	0	0	0	0	0	0	0	0	0	0
ENSMUSG00000038685.18	54	294	307	23	27	57	745	136	73	85	267	82	32	15	46	126	181	130	150	81	61	10	125	122	136	124	48	33	57	58	22	37	18
ENSMUSG00000104545.1	0	0	0	0	0	0	0	0	0	0	0	0	0	0	0	0	0	0	0	0	0	0	0	0	0	0	0	0	0	0	0	0	0
ENSMUSG00000030983.4	193	475	619	38	20	39	802	190	103	153	184	112	92	26	49	164	275	221	337	156	203	27	203	166	352	86	65	53	86	116	49	44	81
ENSMUSG00000051146.2	9	0	0	0	0	0	5	1	0	0	1	0	0	0	0	0	0	0	0	3	0	0	0	0	13	0	1	0	0	0	0	0	0
ENSMUSG00000096605.1	0	0	0	0	0	0	0	0	0	0	0	0	0	0	0	0	0	0	0	0	0	0	0	0	0	0	0	0	0	0	0	0	0
ENSMUSG00000084663.1	0	0	0	0	0	0	0	0	0	0	0	0	0	0	0	0	0	0	0	0	0	0	0	0	0	0	0	0	0	0	0	0	0
ENSMUSG00000039886.8	74	158	7	17	4	0	245	60	47	51	19	31	6	5	14	47	35	15	57	25	20	6	82	31	95	40	21	22	15	1	9	7	7
ENSMUSG00000095387.5	0	0	0	0	0	0	0	0	7	0	0	0	0	0	0	1	0	0	0	0	0	0	0	0	0	0	0	0	0	0	0	0	0
ENSMUSG00000021713.9	13	251	237	8	1	34	239	64	34	36	77	42	21	7	9	42	61	120	75	87	56	22	24	46	76	42	30	42	23	26	16	48	18
ENSMUSG00000052180.15	0	0	0	0	0	0	0	0	0	0	3	0	0	0	1	0	0	0	0	0	0	0	0	0	0	0	0	0	0	0	0	0	0
ENSMUSG00000109128.1	0	0	0	0	0	0	0	0	0	0	0	0	0	0	0	0	0	0	0	0	0	0	0	0	0	0	0	0	0	0	0	0	0
ENSMUSG00000100225.1	0	0	0	0	0	0	0	0	0	0	0	0	0	0	0	0	0	0	0	0	0	0	0	0	0	0	0	0	0	0	0	0	0
ENSMUSG00000025078.8	37	74	121	21	28	69	178	54	21	38	43	27	35	7	11	59	64	59	107	49	33	7	57	57	68	30	26	15	36	24	37	79	31
ENSMUSG00000110713.1	0	0	0	0	0	0	0	0	0	0	0	0	0	0	0	0	0	0	0	0	0	0	0	0	0	0	0	0	0	0	0	0	0
ENSMUSG00000105857.1	0	0	0	0	0	0	0	0	0	0	0	0	0	0	0	0	0	0	0	0	0	0	0	0	0	0	0	0	0	0	0	0	0
ENSMUSG00000035566.7	0	0	0	0	20	0	0	0	4	0	0	0	0	0	0	0	0	0	0	0	0	0	0	15	0	0	0	0	0	0	0	0	0
ENSMUSG00000017000.2	0	0	0	0	0	0	0	0	0	0	0	0	0	0	0	0	0	0	0	0	0	0	0	0	0	0	0	0	0	0	0	0	0
ENSMUSG00000050910.5	1	0	1	0	0	0	3	0	0	1	11	1	0	0	4	0	6	0	0	0	5	0	4	8	1	0	0	0	0	0	0	0	0
ENSMUSG00000047508.9	0	0	0	0	0	0	0	0	0	0	0	0	0	0	0	0	0	0	0	0	0	0	0	0	0	0	0	0	0	0	0	0	0
ENSMUSG00000099734.1	0	0	0	0	0	0	0	0	0	0	0	0	0	0	0	0	0	0	0	0	0	0	0	0	0	0	0	0	0	0	0	0	0
ENSMUSG00000114078.1	0	0	0	0	0	0	0	0	0	0	0	0	0	0	0	0	0	0	0	0	0	0	0	0	0	0	0	0	0	0	0	0	0
ENSMUSG00000087792.1	0	0	0	0	0	0	0	0	0	0	0	0	0	0	0	0	0	0	0	0	0	0	0	0	0	0	0	0	0	0	0	0	0
ENSMUSG00000024842.7	2	0	0	0	2	0	4	4	2	5	2	7	0	0	3	2	0	4	0	3	1	0	5	7	14	0	1	0	3	4	0	0	0
ENSMUSG00000064763.1	0	0	0	0	0	0	0	0	0	0	0	0	0	0	0	0	0	0	0	0	0	0	0	0	0	0	0	0	0	0	0	0	0
ENSMUSG00000061080.11	0	15	0	0	0	0	0	1	0	2	0	0	0	0	0	0	0	0	0	0	0	0	1	0	0	0	0	0	0	0	0	0	0
ENSMUSG00000031103.12	47	227	97	14	3	3	259	55	32	30	65	24	12	6	20	33	38	80	49	48	46	3	44	60	73	23	22	10	21	23	13	30	13
ENSMUSG00000040867.12	0	0	0	0	0	0	0	0	0	0	1	0	0	0	0	0	0	0	0	0	0	0	0	0	0	0	0	0	0	0	0	0	0
ENSMUSG00000103354.1	0	0	0	0	0	0	0	0	0	0	0	0	0	0	0	0	0	0	0	0	0	0	0	0	0	0	0	0	0	0	0	0	0
ENSMUSG00000033063.8	0	0	0	0	0	0	0	0	0	0	0	0	0	0	0	0	0	0	0	0	0	0	0	0	0	0	0	0	0	0	0	0	0
ENSMUSG00000045005.9	0	13	51	2	24	0	43	21	6	13	11	14	5	3	6	30	31	39	26	19	13	6	20	28	34	21	16	7	10	24	12	0	13
ENSMUSG00000115779.1	0	0	0	0	0	0	0	0	0	0	0	0	0	0	0	0	0	0	0	0	0	0	0	0	0	0	0	0	0	0	0	0	0
ENSMUSG00000042425.18	0	0	0	0	0	0	0	0	0	0	0	0	0	0	0	0	0	0	0	0	0	0	0	0	0	0	0	0	0	0	0	0	0
ENSMUSG00000095414.1	0	0	0	0	0	0	0	0	0	0	0	0	0	0	0	0	0	0	0	0	0	0	0	0	0	0	0	0	0	0	0	0	0
ENSMUSG00000113842.1	0	0	0	0	0	0	0	0	0	0	0	0	0	0	0	0	0	0	0	0	0	0	0	0	0	0	0	0	0	0	0	0	0
ENSMUSG00000002032.17	17	0	0	0	0	0	6	0	0	1	0	0	0	0	4	0	0	0	0	0	0	0	2	1	0	0	0	0	0	0	0	0	0
ENSMUSG00000108986.1	0	0	0	0	0	0	0	0	0	0	0	0	0	0	0	0	0	0	0	0	0	0	0	0	0	0	0	0	0	0	0	0	0
ENSMUSG00000083472.1	0	0	0	0	0	0	0	0	0	0	0	0	0	0	0	0	0	0	0	0	0	0	0	0	0	0	0	0	0	0	0	0	0
ENSMUSG00000058622.1	0	0	0	0	0	0	0	0	0	0	0	0	0	0	0	0	0	0	0	0	0	0	0	0	0	0	0	0	0	0	0	0	0
ENSMUSG00000095897.1	0	0	0	0	0	0	0	0	0	0	0	0	0	0	0	0	0	0	0	0	0	0	0	0	0	0	0	0	0	0	0	0	0
ENSMUSG00000034913.10	0	0	0	0	0	0	0	0	0	0	0	0	0	0	0	0	0	0	0	0	0	0	0	0	0	0	0	0	0	0	0	0	0
ENSMUSG00000040435.12	287	622	297	555	668	953	1127	163	98	50	212	68	254	11	25	1559	679	1528	874	1720	1878	48	208	50	966	293	286	879	628	565	1401	1152	1032
ENSMUSG00000093960.1	0	0	0	0	0	0	0	0	0	0	0	0	0	0	0	0	0	0	0	0	0	0	0	0	0	0	0	0	0	0	0	0	0
ENSMUSG00000106000.1	0	0	0	0	0	0	0	0	0	0	0	0	0	0	0	0	0	0	0	0	0	0	0	0	0	0	0	0	0	0	0	0	0
ENSMUSG00000025588.4	0	0	0	0	0	0	0	0	0	0	0	0	0	0	0	0	0	0	0	0	0	0	0	1	0	0	0	0	0	0	0	0	0
ENSMUSG00000111459.1	0	0	0	0	0	0	0	0	0	0	0	0	0	0	0	0	0	0	0	0	0	0	0	0	0	0	0	0	0	0	0	0	0
ENSMUSG00000081089.1	0	0	0	0	0	0	0	0	0	0	0	0	0	0	0	0	0	0	0	0	0	0	0	0	0	0	0	0	0	0	0	0	0
ENSMUSG00000088055.1	0	0	0	0	0	0	0	0	0	0	0	0	0	0	0	0	0	0	0	0	0	0	0	0	0	0	0	0	0	0	0	0	0
ENSMUSG00000106483.1	0	0	0	0	0	0	0	0	0	0	0	0	0	0	0	0	0	0	0	0	0	0	0	0	0	0	0	0	0	0	0	0	0
ENSMUSG00000041168.9	289	295	122	38	15	36	679	177	166	113	259	114	50	18	65	187	165	302	154	104	101	66	259	117	191	120	48	44	81	40	32	45	32
ENSMUSG00000025105.9	0	0	0	0	0	10	3	0	0	0	1	0	0	0	2	1	0	0	0	2	9	0	0	14	0	0	0	0	0	0	0	0	0
ENSMUSG00000098543.1	0	0	0	0	0	0	0	0	0	0	0	0	0	0	0	0	0	0	0	0	0	0	0	0	0	0	0	0	0	0	0	0	0
ENSMUSG00000091577.2	0	0	0	0	0	0	0	0	0	0	0	0	0	0	0	0	0	0	0	0	0	0	0	0	0	0	0	0	0	0	0	0	0
ENSMUSG00000082307.3	0	0	0	0	0	0	0	0	0	0	0	0	0	0	0	0	0	0	0	0	0	0	0	0	0	0	0	0	0	0	0	0	0
ENSMUSG00000087939.1	0	0	0	0	0	0	0	0	0	0	0	0	0	0	0	0	0	0	0	0	0	0	0	0	0	0	0	0	0	0	0	0	0
ENSMUSG00000114105.1	0	0	0	0	0	0	7	0	0	2	0	0	0	0	0	0	0	0	0	0	0	0	0	0	0	0	0	0	0	0	0	0	0
ENSMUSG00000102163.1	0	0	0	0	0	0	0	0	0	0	0	0	0	0	0	0	0	0	0	0	0	0	0	0	0	0	0	0	0	0	0	0	0
ENSMUSG00000028234.6	5307	8544	10204	988	1408	2401	20635	6463	4872	4460	4456	3106	1834	824	1975	6174	5069	4395	6443	5414	5953	849	5017	5171	10136	2664	2385	1758	1793	2322	1766	1533	1384
ENSMUSG00000105318.1	0	0	0	0	0	0	0	0	0	0	0	0	0	0	0	0	0	0	0	0	0	0	0	0	0	0	0	0	0	0	0	0	0
ENSMUSG00000020696.18	78	207	248	21	40	23	159	50	81	48	20	48	35	7	8	75	67	150	140	106	117	3	64	44	159	24	51	23	47	90	109	91	48
ENSMUSG00000114588.1	0	0	0	0	0	0	0	0	0	0	0	0	0	0	0	0	0	0	0	0	0	0	0	0	0	0	0	0	0	0	0	0	0
ENSMUSG00000000056.7	154	442	257	131	266	252	370	59	60	69	264	55	52	15	22	466	262	377	235	581	599	47	120	92	196	123	103	322	269	352	635	494	317
ENSMUSG00000112651.1	0	0	0	0	0	0	0	0	0	0	0	0	0	0	0	0	0	0	0	0	0	0	0	0	0	0	0	0	0	0	0	0	0
ENSMUSG00000019470.12	68	504	117	19	52	51	831	148	92	150	281	126	71	40	69	261	184	116	241	142	84	54	325	149	322	191	71	92	67	65	83	68	56
ENSMUSG00000031756.5	21	28	11	1	0	0	252	71	36	43	90	23	0	2	15	17	5	0	19	27	6	11	11	23	15	24	9	1	2	7	0	3	7
ENSMUSG00000028549.17	41	177	87	5	10	5	136	34	13	24	94	13	13	6	12	26	38	13	59	29	47	10	48	40	110	8	10	2	10	18	3	11	3
ENSMUSG00000115806.1	0	0	0	0	0	0	0	0	0	0	0	0	0	0	0	0	0	0	0	0	0	0	0	0	0	0	0	0	0	0	0	0	0
ENSMUSG00000085436.1	5	9	3	3	17	2	48	4	12	10	35	6	3	1	3	16	12	0	34	7	1	0	12	2	22	21	10	2	0	0	5	8	1
ENSMUSG00000039007.10	182	69	16	29	18	14	188	157	58	193	45	55	67	53	72	150	96	166	54	76	112	17	138	148	348	29	56	30	1	71	32	10	23
ENSMUSG00000031154.15	764	2607	1773	565	871	1650	1564	501	308	275	640	319	326	69	142	1126	1161	1790	1362	1513	1198	114	563	343	1100	447	234	975	517	949	2108	1468	1675
ENSMUSG00000095924.1	0	0	0	0	0	0	0	0	0	0	0	0	0	0	0	0	0	0	0	0	0	0	0	0	0	0	0	0	0	0	0	0	0
ENSMUSG00000083982.1	0	0	0	0	0	0	0	0	0	0	0	0	1	0	0	0	1	0	0	0	0	0	0	0	1	0	0	0	0	0	0	0	0
ENSMUSG00000110268.1	0	0	0	0	0	0	0	0	0	0	0	0	0	0	0	0	0	0	0	0	0	0	0	0	0	0	0	0	0	0	0	0	0
ENSMUSG00000105292.1	0	0	0	0	0	0	0	0	0	0	0	0	0	0	0	0	0	0	0	0	0	0	0	0	0	0	0	0	0	0	0	0	0
ENSMUSG00000073494.5	0	0	0	1	0	0	10	9	5	1	0	6	0	0	1	1	0	0	0	0	0	7	5	17	18	1	0	0	0	0	0	0	1
ENSMUSG00000081116.1	0	0	0	0	0	0	0	0	0	0	0	0	0	0	0	0	0	0	0	0	0	0	0	0	0	0	0	0	0	0	0	0	0
ENSMUSG00000099289.1	0	0	0	0	0	0	0	0	0	0	0	0	0	0	0	0	0	0	0	0	0	2	0	0	0	0	0	0	0	0	0	0	0
ENSMUSG00000106510.1	0	0	0	0	0	0	0	0	0	0	0	0	0	0	0	0	0	0	0	0	0	0	0	0	0	0	0	0	0	0	0	0	0
ENSMUSG00000076140.1	0	0	0	0	0	0	0	0	0	0	0	0	0	0	0	0	0	0	0	0	0	0	0	0	0	0	0	0	0	0	0	0	0
ENSMUSG00000115780.1	0	0	0	0	0	0	0	0	0	0	0	0	0	0	0	0	0	0	0	0	0	0	0	0	0	0	0	0	0	0	0	0	0
ENSMUSG00000111969.1	0	0	0	0	0	0	0	0	0	0	0	0	0	0	0	0	0	0	0	0	0	0	0	0	0	0	0	0	0	0	0	0	0
ENSMUSG00000081599.1	0	0	0	0	0	0	0	0	0	0	0	0	0	0	0	0	0	0	0	0	0	0	0	0	0	0	0	0	0	0	0	0	0
ENSMUSG00000088565.1	0	0	0	0	0	0	0	0	0	0	0	0	0	0	0	0	0	0	0	0	0	0	0	0	0	0	0	0	0	0	0	0	0
ENSMUSG00000065536.2	0	0	0	0	0	0	0	0	0	0	0	0	0	0	0	0	0	0	0	0	0	0	0	0	0	0	0	0	0	0	0	0	0
ENSMUSG00000091604.2	0	0	0	0	0	0	0	0	0	0	0	0	0	0	0	0	0	0	0	0	0	0	0	0	0	0	0	0	0	0	0	0	0
ENSMUSG00000104127.1	0	0	0	0	0	0	0	0	0	0	0	0	0	0	0	0	0	0	0	0	0	0	0	0	0	0	0	0	0	0	0	0	0
ENSMUSG00000055048.7	0	0	0	0	0	0	0	0	0	0	0	0	0	0	0	0	0	0	0	0	0	0	0	0	0	0	0	0	0	0	0	0	0
ENSMUSG00000113397.1	0	0	0	0	0	0	0	0	0	0	0	0	0	0	0	0	0	0	0	0	0	0	0	0	0	0	0	0	0	0	0	0	0
ENSMUSG00000114615.1	0	0	0	0	0	0	0	1	0	0	0	0	0	0	0	0	0	0	0	0	0	0	0	0	0	0	0	0	0	0	0	0	0
ENSMUSG00000109759.1	0	0	0	0	0	0	0	0	0	0	0	0	0	0	0	0	0	0	0	0	0	0	0	0	0	0	0	0	0	0	0	0	0
ENSMUSG00000084245.1	0	0	0	0	0	0	0	0	0	0	0	0	0	0	0	0	0	0	0	0	0	0	0	0	0	0	0	0	0	0	0	0	0
ENSMUSG00000037017.15	34	122	139	9	13	7	253	57	41	47	96	28	17	7	15	66	75	84	87	47	53	21	61	78	89	46	48	6	50	13	19	14	3
ENSMUSG00000102673.1	0	0	0	0	0	0	0	0	0	0	0	0	0	0	0	0	0	0	0	0	0	0	0	0	0	0	0	0	0	0	0	0	0
ENSMUSG00000040054.16	81	253	378	41	17	41	388	90	64	66	245	37	27	7	31	147	149	148	152	96	57	38	113	83	213	79	68	31	27	29	38	40	53
ENSMUSG00000094733.1	0	0	35	0	0	0	24	20	7	0	0	6	0	0	2	6	0	0	0	0	0	0	2	2	7	1	2	0	5	0	0	4	0
ENSMUSG00000035459.17	19	0	0	0	3	18	11	0	1	0	5	1	2	1	1	7	1	33	0	0	1	0	1	3	4	2	2	0	0	0	0	7	0
ENSMUSG00000107256.1	0	0	0	0	0	0	0	0	0	0	0	0	0	0	0	0	0	0	0	0	0	0	0	0	0	0	0	0	0	0	0	0	0
ENSMUSG00000082791.3	0	0	0	0	0	0	0	0	0	0	0	0	0	0	0	0	0	0	0	0	0	0	0	0	0	0	0	0	0	1	0	0	0
ENSMUSG00000001228.14	4	0	15	8	28	20	494	118	83	36	270	58	12	10	23	39	20	55	29	33	44	9	19	51	24	47	14	21	21	35	0	36	14
ENSMUSG00000039058.11	0	0	0	0	0	0	1	0	0	0	0	0	0	0	0	0	5	0	0	0	0	0	0	1	0	0	1	0	0	0	0	0	0
ENSMUSG00000101508.1	0	0	0	0	0	0	0	0	0	0	0	0	0	0	0	0	0	0	0	0	0	0	0	0	0	0	0	0	0	0	0	0	0
ENSMUSG00000099316.1	0	0	0	0	0	0	0	0	0	0	0	0	0	0	0	0	0	0	0	0	0	0	0	0	0	0	0	0	0	0	0	0	0
ENSMUSG00000092230.1	0	0	0	0	0	0	0	0	0	0	0	0	0	0	0	0	0	0	0	0	0	0	0	0	0	0	0	0	0	0	0	0	0
ENSMUSG00000087374.1	0	0	0	0	0	0	0	0	0	0	0	0	0	0	0	0	0	0	0	0	0	0	0	0	0	0	0	0	0	0	0	0	0
ENSMUSG00000110778.1	0	0	0	0	0	0	0	0	0	0	0	0	0	0	0	0	0	0	0	0	0	0	0	0	0	0	0	0	0	0	0	0	0
ENSMUSG00000071138.4	0	0	0	0	0	0	0	0	0	0	0	0	0	0	0	0	0	0	0	0	0	0	0	0	0	0	0	0	0	0	0	0	0
ENSMUSG00000059482.15	31	31	220	15	3	7	135	31	8	22	46	14	8	5	10	23	18	0	70	27	28	0	36	30	78	14	12	21	3	15	25	0	3
ENSMUSG00000097862.1	0	0	0	0	0	0	0	0	0	0	0	0	0	0	0	0	0	0	0	0	0	0	0	0	0	0	0	0	0	0	0	0	0
ENSMUSG00000081626.3	0	0	0	0	0	0	0	0	0	0	0	0	0	0	0	0	0	0	0	0	0	0	0	0	0	0	0	0	0	0	0	0	0
ENSMUSG00000113424.1	13	59	0	0	30	25	13	1	2	2	3	0	6	2	2	0	4	146	36	0	13	6	8	1	54	2	11	9	1	16	17	72	58
ENSMUSG00000029007.8	166	155	215	35	37	48	822	203	136	288	383	116	63	50	96	229	103	197	191	75	156	43	245	165	329	106	88	104	57	92	17	54	40
ENSMUSG00000086209.1	0	0	0	0	0	0	0	0	0	0	0	0	0	0	0	0	0	0	0	0	0	0	0	0	0	1	0	0	0	0	0	0	0
ENSMUSG00000099799.6	0	0	0	0	0	0	0	0	0	0	0	0	0	0	0	0	0	0	0	0	0	0	0	0	0	0	0	0	0	0	0	0	0
ENSMUSG00000101482.1	0	0	0	0	0	0	0	0	0	0	0	0	0	0	0	0	0	0	0	0	0	0	0	0	0	0	0	0	0	0	0	0	0
ENSMUSG00000023008.18	41	29	82	15	0	7	72	55	21	19	105	18	17	5	10	37	105	48	72	52	13	11	37	35	38	26	7	25	27	3	0	17	0
ENSMUSG00000095479.1	0	0	0	0	0	0	0	0	0	0	0	0	0	0	0	0	0	0	0	0	0	0	0	0	0	0	0	0	0	0	0	0	0
ENSMUSG00000102700.1	0	0	0	0	0	0	0	0	0	0	0	0	0	0	0	0	0	0	0	0	0	0	0	0	0	0	0	0	0	0	0	0	0
ENSMUSG00000111970.1	0	0	0	0	0	0	0	0	0	0	0	0	0	0	0	0	0	0	0	0	0	0	0	0	0	0	0	0	0	0	0	0	0
ENSMUSG00000084755.1	0	0	1	0	0	1	0	0	0	0	0	0	1	0	0	0	4	1	0	1	0	0	0	0	0	0	0	0	1	0	0	1	0
ENSMUSG00000106065.1	0	0	0	0	0	0	0	0	0	0	0	0	0	0	0	0	0	0	0	0	0	0	0	0	0	0	0	0	0	0	0	0	0
ENSMUSG00000051238.6	29	30	68	9	8	11	95	21	10	40	30	8	2	3	15	35	26	33	39	12	29	7	32	40	92	27	13	0	3	9	8	1	8
ENSMUSG00000100317.1	0	0	0	0	0	0	0	0	0	0	0	0	0	0	0	0	0	0	0	0	0	0	0	0	0	0	0	0	0	0	0	0	0
ENSMUSG00000025050.7	57	140	259	3	9	16	159	47	55	30	65	33	28	9	10	34	84	85	59	47	33	17	51	37	75	27	36	1	25	7	9	1	13
ENSMUSG00000040514.6	0	0	0	0	0	0	0	0	0	0	0	0	0	0	0	0	0	0	0	0	0	0	0	0	0	0	0	0	0	0	0	0	0
ENSMUSG00000089338.1	0	0	0	0	0	0	0	0	0	0	0	0	0	0	0	0	0	0	0	0	0	0	0	0	0	0	0	0	0	0	0	0	0
ENSMUSG00000087401.1	0	0	0	0	0	0	0	0	0	0	0	0	0	0	0	0	0	0	0	0	0	0	0	0	0	0	0	0	0	0	0	0	0
ENSMUSG00000024188.15	183	746	545	42	122	62	737	247	126	138	414	152	81	38	49	185	340	210	363	168	118	49	301	198	448	145	110	75	82	139	93	82	55
ENSMUSG00000034151.13	0	0	0	0	0	0	0	0	0	0	0	0	0	0	0	0	0	0	0	0	0	0	0	0	0	0	0	0	0	0	0	0	0
ENSMUSG00000105949.1	0	0	0	0	0	0	0	0	0	0	0	0	0	0	0	0	0	0	0	0	0	0	0	0	0	0	0	0	0	0	0	0	0
ENSMUSG00000077396.1	0	0	0	0	0	0	0	0	0	0	0	0	0	0	0	0	0	0	0	0	0	0	0	0	0	0	0	0	0	0	0	0	0
ENSMUSG00000018666.13	171	527	853	4	20	94	634	180	66	81	563	121	24	20	68	117	187	137	300	153	146	41	167	155	249	111	57	61	58	97	96	26	56
ENSMUSG00000099826.1	0	0	0	0	0	0	0	0	0	0	0	0	0	0	0	0	0	0	0	0	0	0	0	0	0	0	0	0	0	0	0	0	0
ENSMUSG00000029556.12	2	0	0	0	0	0	0	0	0	0	4	0	0	0	0	0	0	0	0	0	0	0	0	0	0	0	0	0	0	0	0	0	0
ENSMUSG00000087884.1	0	0	0	0	0	0	0	0	0	0	0	0	0	0	0	0	0	0	0	0	0	0	0	0	0	0	0	0	0	0	0	0	0
ENSMUSG00000064855.1	0	0	0	0	0	0	0	0	0	0	0	0	0	0	0	0	0	0	0	0	0	0	0	0	0	0	0	0	0	0	0	0	0
ENSMUSG00000114050.1	0	0	0	0	0	0	0	0	0	0	0	0	0	0	0	0	0	0	0	0	0	0	0	0	0	0	0	0	0	0	0	0	0
ENSMUSG00000109194.1	0	0	0	0	0	0	0	0	0	0	0	0	0	0	0	0	0	0	0	0	0	0	0	0	0	0	0	0	0	0	0	0	0
ENSMUSG00000027998.11	310	542	455	36	55	68	1209	330	138	195	427	151	101	38	84	282	168	262	287	133	167	81	347	245	624	192	114	116	102	117	107	120	88
ENSMUSG00000103446.1	0	0	0	0	0	0	0	0	0	0	0	0	0	0	0	0	0	0	0	0	0	0	0	0	0	0	0	0	0	0	0	0	0
ENSMUSG00000095506.1	0	0	0	0	0	0	0	0	0	0	0	0	0	0	0	0	0	0	0	0	0	0	0	0	0	0	0	0	0	0	0	0	0
ENSMUSG00000113934.1	0	0	0	0	0	0	0	0	0	0	0	0	0	0	0	0	0	0	0	0	0	0	0	0	0	0	0	0	0	0	0	0	0
ENSMUSG00000083564.1	0	0	0	0	0	0	0	0	0	0	0	0	0	0	0	0	0	0	0	0	0	0	0	0	0	0	0	0	0	0	0	0	0
ENSMUSG00000101992.1	0	0	0	0	0	0	0	0	0	0	0	0	0	0	0	0	0	0	0	0	0	0	0	0	0	0	0	0	0	0	0	0	0
ENSMUSG00000108029.1	0	0	0	0	0	0	0	0	0	0	0	0	0	0	0	0	0	0	0	0	0	0	0	0	0	0	0	0	0	0	0	0	0
ENSMUSG00000095989.1	0	0	0	0	0	0	0	0	0	0	0	0	0	0	0	0	0	0	0	0	0	0	0	0	0	0	0	0	0	0	0	0	0
ENSMUSG00000022838.13	2	27	19	0	0	15	58	29	7	24	10	22	14	3	5	20	28	18	28	12	18	0	8	16	28	6	4	16	0	7	6	4	2
ENSMUSG00000048226.5	0	0	0	0	0	0	0	0	0	0	0	0	0	0	0	0	0	0	0	0	0	0	0	0	0	0	0	0	0	0	0	0	0
ENSMUSG00000051748.2	767	150	79	176	56	61	764	158	198	399	24	355	54	54	136	67	22	32	9	31	58	113	64	20	135	454	748	1	50	31	0	8	11
ENSMUSG00000093003.1	0	0	0	0	0	0	0	0	0	0	0	0	0	0	0	0	0	0	0	0	0	0	0	0	0	0	0	0	0	0	0	0	0
ENSMUSG00000088147.1	0	0	0	0	0	0	0	0	0	0	0	0	0	0	0	0	0	0	0	0	0	0	0	0	0	0	0	0	0	0	0	0	0
ENSMUSG00000081061.1	0	0	0	0	0	0	0	0	0	0	0	0	0	0	0	0	0	0	0	0	0	0	0	0	0	0	0	0	0	0	0	0	0
ENSMUSG00000106575.1	0	0	0	0	0	0	0	0	0	0	0	0	0	0	0	0	0	0	0	0	0	0	0	0	0	0	0	0	0	0	0	0	0
ENSMUSG00000029491.7	0	0	0	0	0	0	3	0	0	0	0	0	0	0	0	0	0	0	0	0	0	0	0	0	0	0	0	0	0	0	0	0	0
ENSMUSG00000043051.17	0	0	0	0	2	0	6	2	0	4	0	4	0	1	0	12	1	0	0	0	0	0	8	5	0	3	1	0	0	0	0	0	0
ENSMUSG00000033728.14	37	39	59	13	3	38	141	50	39	40	92	28	9	7	15	57	18	46	31	36	33	12	61	40	70	30	12	31	21	17	0	23	3
ENSMUSG00000091669.1	0	0	0	0	0	0	0	0	0	0	0	0	0	0	0	0	0	0	0	0	0	0	0	0	0	0	0	0	0	0	0	0	0
ENSMUSG00000098635.1	0	0	0	0	0	0	0	0	0	0	0	0	0	0	0	0	0	0	0	0	0	0	0	0	0	0	0	0	0	0	0	0	0
ENSMUSG00000065481.1	0	0	0	0	0	0	0	0	0	0	0	0	0	0	0	0	0	0	0	0	0	0	0	0	0	0	0	0	0	0	0	0	0
ENSMUSG00000086693.1	0	2	19	0	0	0	4	0	0	0	5	0	5	0	0	0	6	0	1	0	0	0	0	0	0	0	0	0	0	0	0	0	0
ENSMUSG00000063273.11	190	711	954	20	43	58	993	278	163	107	384	146	112	28	84	259	308	185	455	283	177	63	213	230	461	117	151	71	94	151	141	66	46
ENSMUSG00000087911.1	0	0	0	0	0	0	0	0	0	0	0	0	0	0	0	0	0	0	0	0	0	0	0	0	0	0	0	0	0	0	0	0	0
ENSMUSG00000036898.16	132	335	246	5	0	38	94	53	1	46	127	28	29	8	16	57	111	78	117	62	45	11	80	56	227	17	18	19	31	41	14	14	55
ENSMUSG00000102255.1	0	0	0	0	0	0	0	0	0	0	0	0	0	0	0	0	0	0	0	0	0	0	0	0	0	0	0	0	0	0	0	0	0
ENSMUSG00000109221.1	0	0	0	0	0	0	0	0	0	0	0	0	0	0	0	0	0	0	0	0	0	0	0	0	0	0	0	0	0	0	0	0	0
ENSMUSG00000096132.1	0	0	0	0	0	0	0	0	0	0	0	0	0	0	0	0	0	0	0	0	0	0	0	0	0	0	0	0	0	0	0	0	0
ENSMUSG00000021240.6	7	7	10	1	1	0	87	11	20	18	25	9	5	6	10	28	15	0	15	10	12	7	46	26	39	16	7	0	9	3	4	1	3
ENSMUSG00000112743.1	0	0	0	0	0	0	0	0	0	0	0	0	0	0	0	0	0	0	0	0	0	0	0	0	0	0	0	0	0	0	0	0	0
ENSMUSG00000084190.1	0	0	0	0	0	0	0	0	0	0	0	0	0	0	0	0	0	0	0	0	0	0	0	0	0	0	0	0	0	0	0	0	0
ENSMUSG00000073103.2	0	0	0	0	0	0	0	0	0	0	0	0	0	0	0	0	0	0	0	0	0	0	0	0	0	0	0	0	0	0	0	0	0
ENSMUSG00000057751.14	0	0	0	0	0	0	0	3	0	1	0	0	0	0	0	0	0	0	0	0	3	1	0	11	2	0	0	0	0	0	0	0	0
ENSMUSG00000030811.14	20	93	56	11	18	26	88	19	13	12	59	10	17	2	5	55	10	51	36	48	73	0	24	16	75	32	14	11	38	38	35	7	20
ENSMUSG00000031738.14	0	0	0	0	0	0	0	0	0	0	0	0	0	0	0	0	0	0	0	0	0	0	0	0	0	0	0	0	0	0	0	0	0
ENSMUSG00000085528.1	0	0	0	0	0	0	0	0	0	0	0	0	0	0	0	0	0	0	0	0	0	0	0	0	0	0	0	0	0	0	0	0	0
ENSMUSG00000033981.14	0	0	0	0	0	0	0	0	0	0	24	0	0	0	0	0	0	0	0	0	0	0	0	0	0	0	0	0	0	0	0	0	0
ENSMUSG00000026005.15	111	746	510	38	30	24	464	164	69	113	267	112	41	31	53	164	295	291	172	93	142	72	195	130	345	87	69	55	57	183	94	59	72
ENSMUSG00000110240.1	0	0	0	0	0	0	0	0	0	0	0	0	0	0	0	0	0	0	0	0	0	0	0	0	0	0	0	0	0	0	0	0	0
ENSMUSG00000105384.1	0	0	0	0	0	0	0	0	0	0	0	0	0	0	0	0	0	0	0	0	0	0	0	0	0	0	0	0	0	0	0	0	0
ENSMUSG00000081208.1	0	0	1	0	0	0	7	2	0	1	11	0	0	1	0	0	0	0	4	0	0	0	3	0	0	1	0	0	0	0	0	0	0
ENSMUSG00000099261.1	0	0	0	0	0	0	0	0	0	0	0	0	0	0	0	0	0	0	0	0	0	0	0	0	0	0	0	0	0	0	0	0	0
ENSMUSG00000106602.1	0	0	0	0	0	0	0	0	0	0	0	0	0	0	0	0	0	0	0	0	0	0	0	0	0	0	0	0	0	0	0	0	0
ENSMUSG00000076232.1	0	0	0	0	0	0	0	0	0	0	0	0	0	0	0	0	0	0	0	0	0	0	0	0	0	0	0	0	0	0	0	0	0
ENSMUSG00000092295.1	0	0	0	0	0	0	0	0	0	0	0	0	0	0	0	0	0	0	0	0	0	0	0	0	0	0	0	0	0	0	0	0	0
ENSMUSG00000055761.14	0	0	0	0	0	0	0	0	0	0	0	0	0	0	0	0	0	0	0	0	0	0	0	0	0	0	0	0	0	0	0	0	0
ENSMUSG00000018914.5	0	0	0	0	0	0	0	0	0	0	0	0	0	0	0	0	0	0	0	0	0	0	0	0	0	0	0	0	0	0	0	0	0
ENSMUSG00000045581.7	0	0	0	0	0	0	0	0	0	0	0	0	0	0	0	0	0	0	0	0	0	0	0	0	0	0	0	0	0	0	0	0	0
ENSMUSG00000029175.17	83	36	84	22	28	21	278	53	23	95	66	33	9	11	20	99	70	142	65	55	69	23	143	101	109	64	37	41	41	33	51	68	11
ENSMUSG00000065628.1	0	0	0	0	0	0	0	0	0	0	0	0	0	0	0	0	0	0	0	0	0	0	0	0	0	0	0	0	0	0	0	0	0
ENSMUSG00000088657.1	0	0	0	0	0	0	0	0	0	0	0	0	0	0	0	0	0	0	0	0	0	0	0	0	0	0	0	0	0	0	0	0	0
ENSMUSG00000086720.1	0	0	0	0	0	0	0	0	0	0	0	0	0	0	0	0	0	0	0	0	0	0	0	0	0	0	0	0	0	0	0	0	0
ENSMUSG00000104219.1	0	0	0	0	0	0	0	0	0	0	0	0	0	0	0	0	0	0	0	0	0	0	0	0	0	0	0	0	0	0	0	0	0
ENSMUSG00000113489.1	0	0	0	0	0	0	0	0	0	0	0	0	0	0	0	0	0	0	0	0	0	0	0	0	0	0	0	0	0	0	0	0	0
ENSMUSG00000114707.1	2	0	0	0	0	0	0	0	0	3	8	0	0	0	4	0	0	0	0	0	1	0	4	1	0	1	0	0	0	0	0	0	0
ENSMUSG00000084337.1	0	0	0	0	0	0	0	0	0	0	0	0	0	0	0	0	0	0	0	0	0	0	0	0	0	0	0	0	0	0	0	0	0
ENSMUSG00000102765.1	0	0	0	0	0	0	0	0	0	0	0	0	0	0	0	0	0	0	0	0	0	0	0	0	0	0	0	0	0	0	0	0	0
ENSMUSG00000109731.1	0	0	0	0	0	0	0	0	0	0	0	0	0	0	0	0	0	0	0	0	0	0	0	0	0	0	0	0	0	0	0	0	0
ENSMUSG00000042962.5	1	0	0	0	2	1	3	0	0	0	4	1	0	0	0	0	1	0	0	1	4	0	1	1	1	1	0	0	1	0	1	0	0
ENSMUSG00000020899.15	12	139	129	3	10	62	115	36	16	29	98	25	12	7	6	50	49	40	112	43	56	2	39	35	76	24	14	15	17	29	13	42	25
ENSMUSG00000022025.13	2	0	0	0	0	0	0	0	0	3	0	0	0	0	0	3	0	0	0	0	0	0	2	4	0	0	0	0	0	0	0	0	0
ENSMUSG00000044390.4	0	8	0	0	0	0	9	2	0	2	1	2	0	0	0	1	0	0	0	1	10	0	2	0	0	0	1	0	3	0	0	0	1
ENSMUSG00000107348.1	0	0	0	0	0	0	0	0	0	0	0	0	0	0	0	0	0	0	0	0	0	0	0	0	0	0	0	0	0	0	0	0	0
ENSMUSG00000047545.5	0	0	144	3	0	18	0	0	8	0	0	0	0	0	0	1	0	0	14	13	1	0	0	0	0	0	0	0	0	0	0	8	0
ENSMUSG00000105411.1	0	0	0	0	0	0	1	0	0	0	0	0	0	0	0	0	0	0	0	0	0	0	0	0	0	0	0	0	0	0	0	0	0
ENSMUSG00000098070.1	0	0	0	0	0	0	0	0	0	0	0	0	0	0	0	0	0	0	0	0	0	0	0	0	0	0	0	0	0	0	0	0	0
ENSMUSG00000031789.17	1	0	2	0	0	0	0	1	2	1	0	2	0	0	0	2	0	0	0	1	0	0	3	0	0	0	0	0	0	0	0	0	0
ENSMUSG00000099408.1	0	0	0	0	0	0	0	0	0	0	0	0	0	0	0	0	0	0	0	0	0	0	0	0	0	0	0	0	0	0	0	0	0
ENSMUSG00000020467.15	6	0	0	0	11	0	20	23	0	16	4	1	0	2	8	3	12	0	8	5	23	0	2	127	38	1	6	0	0	4	0	30	0
ENSMUSG00000016503.16	117	263	238	37	35	44	1012	247	163	176	233	121	75	36	77	226	140	121	205	109	146	65	260	158	324	129	62	83	86	82	33	52	63
ENSMUSG00000105894.1	0	0	0	0	0	0	0	0	0	0	0	1	0	0	0	0	0	0	0	0	0	0	0	0	0	0	0	0	0	0	0	0	0
ENSMUSG00000080380.1	0	0	0	0	0	0	0	0	0	0	0	0	0	0	0	0	0	0	0	0	0	0	0	0	0	0	0	0	0	0	0	0	0
ENSMUSG00000094825.8	0	0	0	0	0	0	0	0	0	0	0	0	0	0	0	0	0	0	0	0	0	0	0	0	0	0	0	0	0	0	0	0	0
ENSMUSG00000081718.1	0	0	0	0	0	0	1	0	0	0	1	0	0	0	0	0	0	0	0	0	0	0	0	0	0	0	0	0	0	0	0	0	0
ENSMUSG00000087466.3	0	0	0	0	0	0	0	0	0	0	0	0	0	0	0	0	0	0	0	0	0	0	0	0	0	0	0	0	0	0	0	0	0
ENSMUSG00000103028.1	0	0	0	0	0	0	0	0	0	0	0	0	0	0	0	0	0	0	0	0	0	0	0	0	0	0	0	0	0	0	0	0	0
ENSMUSG00000097954.1	0	0	0	0	0	0	0	0	0	0	0	0	0	0	0	0	0	0	0	0	0	0	0	0	0	0	0	0	0	0	0	0	0
ENSMUSG00000024999.7	49	124	136	16	18	0	161	62	23	23	81	39	11	7	18	54	39	4	107	33	54	40	50	46	110	40	24	12	31	38	31	3	20
ENSMUSG00000022013.4	364	488	711	68	46	159	4169	441	279	417	540	183	129	139	340	357	141	168	262	328	295	103	285	343	390	267	289	90	138	188	66	93	82
ENSMUSG00000058297.16	0	4	0	5	0	4	20	1	3	0	0	0	0	1	2	6	5	0	0	5	3	0	0	3	0	0	0	0	0	0	0	0	0
ENSMUSG00000113516.1	0	0	0	0	0	0	0	0	0	0	0	0	0	0	0	0	0	0	0	0	0	0	0	0	0	0	0	0	0	0	0	0	0
ENSMUSG00000051579.10	199	502	279	60	96	381	56	24	7	19	32	11	9	4	3	27	148	234	129	90	73	1	17	25	106	6	7	78	31	127	318	196	285
ENSMUSG00000108540.1	0	0	0	0	0	0	0	0	0	0	0	0	0	0	0	0	0	0	0	0	0	0	0	0	0	0	0	0	0	0	0	0	0
ENSMUSG00000059461.7	55	89	38	10	25	49	67	18	24	0	31	9	14	1	1	18	109	62	122	51	53	1	11	4	118	2	1	15	15	19	20	19	22
ENSMUSG00000092322.8	0	0	0	0	0	0	0	0	0	0	0	0	0	0	0	0	0	0	0	0	0	0	0	0	0	0	0	0	0	0	0	0	0
ENSMUSG00000101574.1	0	0	0	0	0	0	0	0	0	0	0	0	0	0	0	0	0	0	0	0	0	0	0	0	0	0	0	0	0	0	0	0	0
ENSMUSG00000113999.1	0	0	0	0	0	0	0	0	0	0	0	0	0	0	0	0	0	0	0	0	0	0	0	0	0	0	0	0	0	0	0	0	0
ENSMUSG00000074359.2	0	0	0	0	0	0	0	0	0	0	0	0	0	0	0	0	0	0	0	0	0	0	0	0	0	0	0	0	0	0	0	0	0
ENSMUSG00000046354.3	0	0	0	0	0	0	0	0	0	0	0	0	0	0	0	0	0	0	0	0	0	0	0	0	0	0	0	0	0	0	0	0	0
ENSMUSG00000032501.9	3	2	0	1	0	1	112	13	26	27	11	19	5	3	18	9	5	11	22	8	22	11	33	24	28	28	13	8	18	0	30	13	8
ENSMUSG00000111013.1	0	0	47	0	0	0	0	2	0	0	13	0	0	0	0	0	0	0	0	0	0	0	0	0	0	0	0	0	0	0	0	0	0
ENSMUSG00000106157.1	0	0	0	0	0	0	0	1	0	0	5	0	0	0	0	2	0	0	0	0	0	0	3	1	1	1	0	0	0	0	0	0	0
ENSMUSG00000082910.1	0	0	0	0	0	0	0	0	0	0	0	0	0	0	0	0	0	0	0	0	0	0	0	0	0	0	0	0	0	0	0	0	0
ENSMUSG00000022076.10	0	0	0	0	0	0	0	0	0	0	0	0	0	0	0	0	0	0	0	0	0	0	0	0	0	0	0	0	0	0	0	1	0
ENSMUSG00000051147.10	104	367	596	0	1	67	270	70	46	49	137	45	15	6	28	71	91	76	72	60	98	27	92	76	245	28	22	71	19	58	35	2	32
ENSMUSG00000060480.5	0	0	0	0	0	0	0	0	0	0	0	0	0	0	0	0	0	0	0	0	0	0	0	0	0	0	0	0	0	0	0	0	0
ENSMUSG00000079871.4	0	0	0	0	0	0	0	0	0	0	0	0	0	0	0	0	0	0	0	0	0	0	0	0	0	0	0	0	0	0	0	0	0
ENSMUSG00000019039.13	76	294	117	5	25	18	225	66	43	28	91	41	36	7	17	75	49	2	117	57	47	12	114	50	122	47	15	18	40	20	7	10	14
ENSMUSG00000091131.1	0	0	0	0	0	0	0	0	0	0	0	0	0	0	0	0	0	0	0	0	0	0	0	0	0	0	0	0	0	0	0	0	0
ENSMUSG00000084847.7	0	0	0	0	0	0	0	0	0	0	0	0	0	0	0	0	0	0	0	0	0	0	0	0	0	0	0	0	0	0	0	0	0
ENSMUSG00000080527.1	0	0	0	0	0	0	0	0	0	0	0	0	0	0	0	0	0	0	0	0	0	0	0	0	0	0	0	0	0	0	0	0	0
ENSMUSG00000077488.1	0	0	0	0	0	0	0	0	0	0	0	0	0	0	0	0	0	0	0	0	0	0	0	0	0	0	0	0	0	0	0	0	0
ENSMUSG00000105921.1	0	0	0	0	0	0	0	0	0	0	0	0	0	0	0	0	0	0	0	0	0	0	0	0	0	0	0	0	0	0	0	0	0
ENSMUSG00000005232.11	0	0	0	0	0	0	0	0	0	0	0	0	0	0	0	0	0	0	0	0	0	0	0	0	0	0	0	0	0	0	0	0	0
ENSMUSG00000098580.1	0	0	0	0	0	0	0	0	0	0	0	0	0	0	0	0	0	0	0	0	0	0	0	0	0	0	0	0	0	0	0	0	0
ENSMUSG00000099918.1	0	0	0	0	0	0	0	0	0	0	0	0	0	0	0	0	0	0	0	0	0	0	0	0	0	0	0	0	0	0	0	0	0
ENSMUSG00000053390.15	73	288	558	8	0	16	259	59	65	50	156	39	44	11	34	93	146	148	230	98	82	11	102	79	178	40	32	63	24	28	43	51	25
ENSMUSG00000114142.1	0	0	0	0	0	0	0	0	0	0	0	0	0	0	0	0	0	0	0	0	0	0	0	0	0	0	0	0	0	0	0	0	0
ENSMUSG00000075551.4	12	0	0	0	7	0	0	0	0	0	0	0	0	0	0	0	0	0	0	0	0	0	0	0	6	0	0	0	0	0	0	0	0
ENSMUSG00000109286.1	0	0	0	0	0	0	0	0	0	0	0	0	0	0	0	0	0	0	0	0	0	0	0	0	0	0	0	0	0	0	0	0	0
ENSMUSG00000064280.13	0	0	0	0	0	0	6	1	0	2	2	0	0	0	2	1	0	13	0	1	0	0	2	0	7	0	2	0	0	0	2	0	0
ENSMUSG00000071369.11	294	795	664	63	12	52	841	210	90	209	149	203	108	37	97	247	420	228	332	136	205	90	335	288	503	170	176	223	106	171	142	69	119
ENSMUSG00000096197.1	0	0	0	0	0	0	0	0	0	0	0	0	0	0	0	0	0	0	0	0	0	0	0	0	0	0	0	0	0	0	0	0	0
ENSMUSG00000054459.8	0	0	0	0	0	0	0	0	0	0	0	0	0	0	0	0	0	0	0	0	0	0	0	1	0	0	0	0	0	0	0	0	0
ENSMUSG00000101601.1	0	0	0	0	0	0	0	0	0	0	0	0	0	0	0	0	0	0	0	0	0	0	0	0	0	0	0	0	0	0	0	0	0
ENSMUSG00000103538.3	0	0	0	0	0	0	0	0	0	0	0	0	0	0	0	0	0	0	0	0	0	0	0	0	0	0	0	0	0	0	0	0	0
ENSMUSG00000043635.12	0	0	0	0	0	0	3	1	0	0	0	0	0	0	0	2	0	0	0	0	0	0	0	0	0	0	0	0	0	0	0	0	0
ENSMUSG00000038879.8	0	0	0	0	0	0	0	0	0	0	0	0	0	0	0	0	0	0	0	0	0	0	0	6	0	0	0	0	0	0	0	0	0
ENSMUSG00000027012.15	377	640	896	77	46	181	1103	257	162	246	424	194	104	71	102	379	335	400	487	295	392	123	320	283	654	252	190	172	160	278	170	107	151
ENSMUSG00000078680.3	0	0	0	0	0	0	0	0	0	0	0	0	0	0	0	0	0	0	0	0	0	0	0	0	0	0	0	0	0	0	0	0	0
ENSMUSG00000042298.18	9	128	164	4	0	0	45	19	1	11	20	13	0	5	5	18	55	0	39	4	10	11	17	29	57	13	18	1	0	8	10	26	11
ENSMUSG00000088239.1	0	0	0	0	0	0	0	0	0	0	0	0	0	0	0	0	0	0	0	0	0	0	0	0	0	0	0	0	0	0	0	0	0
ENSMUSG00000106667.1	0	0	0	0	0	0	0	0	0	0	0	0	0	0	0	0	0	0	0	0	0	0	0	0	0	0	0	0	0	0	0	0	0
ENSMUSG00000081153.1	0	0	0	0	0	0	2	0	0	0	0	0	0	0	0	0	0	0	0	1	1	0	0	0	0	0	0	0	0	0	0	0	0
ENSMUSG00000104730.1	0	0	0	0	0	0	0	0	0	0	0	0	0	0	0	0	0	0	0	0	0	0	0	0	0	0	0	0	0	0	0	0	0
ENSMUSG00000077515.1	0	0	0	0	0	0	0	0	0	0	0	0	0	0	0	0	0	0	0	0	0	0	0	0	0	0	0	0	0	0	0	0	0
ENSMUSG00000098727.1	0	0	0	0	0	0	0	0	0	0	0	0	0	0	0	0	0	0	0	0	0	0	0	0	0	0	0	0	0	0	0	0	0
ENSMUSG00000048292.3	0	0	0	0	0	0	0	0	0	0	0	0	0	0	0	0	0	0	0	0	0	0	0	0	0	0	0	0	0	0	0	0	0
ENSMUSG00000065573.1	0	0	15	0	0	0	0	0	0	0	0	1	0	0	0	0	0	0	0	0	0	0	0	0	0	0	0	0	0	0	0	0	0
ENSMUSG00000086785.1	0	0	0	0	0	0	0	0	0	0	0	0	0	0	0	0	0	0	0	0	0	0	0	0	0	0	0	0	0	0	0	0	0
ENSMUSG00000102347.1	0	0	0	0	0	0	0	0	0	0	0	0	0	0	0	0	0	0	0	0	0	0	0	0	0	0	0	0	0	0	0	0	0
ENSMUSG00000053268.7	0	0	0	0	0	0	0	0	0	0	0	0	0	0	0	0	0	0	0	0	0	0	0	0	0	0	0	0	0	0	0	0	0
ENSMUSG00000027080.6	161	253	213	16	27	52	262	63	58	26	114	32	39	11	13	86	92	76	103	104	97	28	82	77	145	43	25	7	38	40	70	28	60
ENSMUSG00000109313.1	0	0	0	0	0	0	0	0	0	0	0	0	0	0	0	0	0	0	0	0	0	0	0	0	0	0	0	0	0	0	0	0	0
ENSMUSG00000034786.17	17	22	22	2	2	4	148	41	42	20	75	26	15	6	11	35	23	39	22	27	20	3	39	18	52	26	10	10	14	4	4	8	3
ENSMUSG00000112835.1	0	0	0	0	0	0	0	0	0	0	0	0	0	0	0	0	0	0	0	0	0	0	0	0	0	0	0	0	0	0	0	0	0
ENSMUSG00000109796.1	0	0	0	0	0	0	0	0	0	0	0	0	0	0	0	0	0	0	0	0	0	0	0	0	0	0	0	0	0	0	0	0	0
ENSMUSG00000084282.1	0	0	0	0	0	0	0	0	0	0	0	0	0	0	0	0	0	0	0	0	0	0	0	0	0	0	0	0	0	0	0	0	0
ENSMUSG00000089431.1	0	0	0	0	0	0	0	0	0	0	0	0	0	0	0	0	0	0	0	0	0	0	0	0	0	0	0	0	0	0	0	0	0
ENSMUSG00000028832.11	22	129	74	38	29	43	2238	547	271	195	1572	249	101	52	136	188	43	39	60	174	138	37	144	339	183	170	115	58	113	92	46	45	39
ENSMUSG00000100893.1	0	0	0	0	0	0	0	0	0	0	0	0	0	0	0	0	0	0	0	0	0	0	0	0	0	0	0	0	0	0	0	0	0
ENSMUSG00000034354.17	1041	2742	1525	759	1109	2907	1996	412	194	403	560	422	253	86	151	1790	1723	2457	1623	2809	2456	179	591	367	1224	480	329	1213	857	1085	3097	2916	2076
ENSMUSG00000060098.11	62	114	146	4	16	41	283	88	74	55	109	40	30	10	23	89	22	80	134	43	62	27	75	61	142	79	34	22	32	47	20	6	28
ENSMUSG00000073678.4	152	1600	1345	37	32	111	241	63	25	81	59	31	33	17	27	166	552	113	398	221	303	41	148	223	374	82	144	61	51	105	101	76	65
ENSMUSG00000110332.1	0	0	0	0	0	0	6	0	0	0	1	0	0	0	0	0	0	0	0	0	2	0	0	2	1	0	0	0	0	0	0	0	0
ENSMUSG00000105476.1	0	0	0	0	0	0	0	0	0	0	0	0	0	0	0	0	0	0	0	0	0	0	0	0	0	0	0	0	0	0	0	0	0
ENSMUSG00000057615.5	0	0	0	0	0	0	0	0	0	0	0	0	0	0	0	0	0	0	0	0	0	0	0	0	0	0	0	0	0	0	0	0	0
ENSMUSG00000019122.8	1044	1778	1534	208	103	215	1666	1437	221	2419	476	182	337	182	531	792	718	245	768	591	1088	116	2395	2316	3982	238	368	233	118	615	492	172	299
ENSMUSG00000092387.1	0	0	0	0	0	0	0	0	0	0	0	0	0	0	0	0	0	0	0	0	0	0	0	0	0	0	0	0	0	0	0	0	0
ENSMUSG00000085594.1	0	0	0	0	0	0	0	0	0	0	0	0	0	0	0	0	0	0	0	0	0	0	0	0	0	0	0	0	0	0	0	0	0
ENSMUSG00000064382.1	0	0	0	0	0	0	0	0	0	0	0	0	0	0	0	0	0	0	0	0	0	0	0	0	0	0	0	0	0	0	0	0	0
ENSMUSG00000088749.1	0	0	0	0	0	0	0	0	0	0	0	0	0	0	0	0	0	0	0	0	0	0	0	0	0	0	0	0	0	0	0	0	0
ENSMUSG00000065600.1	0	0	0	0	0	0	0	0	0	0	0	0	0	0	0	0	0	0	0	0	0	0	0	0	0	0	0	0	0	0	0	0	0
ENSMUSG00000086812.1	0	0	0	0	0	0	0	0	0	0	0	0	0	0	0	0	0	0	0	0	0	0	0	0	0	0	0	0	0	0	0	0	0
ENSMUSG00000099353.6	0	0	0	0	0	0	0	0	0	0	0	0	0	0	0	0	0	0	0	0	0	0	0	0	0	0	0	0	0	0	0	0	0
ENSMUSG00000026842.16	2	95	42	9	0	0	110	24	10	23	63	18	13	11	6	47	70	22	35	39	30	7	77	40	58	29	13	15	4	10	13	6	8
ENSMUSG00000095033.1	0	0	0	0	0	0	0	0	0	0	0	0	0	0	0	0	0	0	0	0	0	0	0	0	0	0	0	0	0	0	0	0	0
ENSMUSG00000027227.7	2531	868	1406	185	102	251	1786	623	568	146	268	439	434	167	203	1022	752	1385	1344	317	181	248	727	151	2107	243	383	167	166	343	112	47	107
ENSMUSG00000113461.1	0	0	0	0	0	0	0	0	0	0	0	0	0	0	0	0	0	0	0	0	0	0	0	0	0	0	0	0	0	0	0	0	0
ENSMUSG00000074870.4	0	0	0	0	0	0	0	0	0	0	0	0	0	0	0	0	0	0	0	0	0	0	0	0	0	0	0	0	0	0	0	0	0
ENSMUSG00000006418.17	873	2545	1820	1273	1433	3472	6838	1727	1474	682	1045	1208	1252	268	386	6496	1733	3999	1710	7308	6337	370	1454	864	3563	1287	1032	2408	1092	2361	4756	3588	4181
ENSMUSG00000083091.1	0	0	0	0	0	0	0	0	0	0	0	0	0	0	0	0	0	0	0	0	0	0	0	0	0	0	0	0	0	0	0	0	0
ENSMUSG00000041696.14	0	0	0	0	0	0	18	8	7	2	1	5	0	1	3	2	3	0	11	4	14	0	11	19	0	8	2	0	0	0	6	0	0
ENSMUSG00000102857.1	0	0	0	0	0	0	0	0	0	0	0	0	0	0	0	0	0	0	0	0	0	0	0	0	0	0	0	0	0	0	0	0	0
ENSMUSG00000109823.1	0	0	0	0	0	0	0	0	0	0	0	0	0	0	0	0	0	0	0	0	0	0	0	0	0	0	0	0	0	0	0	0	0
ENSMUSG00000100920.1	0	0	0	0	0	0	0	0	0	0	0	0	0	0	0	0	0	0	0	0	0	0	0	0	0	0	0	0	0	0	0	0	0
ENSMUSG00000094917.1	0	0	0	0	0	0	0	0	0	0	0	0	0	0	0	0	0	0	0	0	0	0	0	0	0	0	0	0	0	0	0	0	0
ENSMUSG00000070550.2	0	0	0	0	0	0	0	0	0	0	0	0	0	0	0	0	0	0	0	0	0	0	0	0	0	0	0	0	0	0	0	0	0
ENSMUSG00000082975.1	0	0	0	0	0	0	0	0	0	0	0	0	0	0	0	0	0	0	0	0	0	0	0	0	0	0	0	0	0	0	0	0	0
ENSMUSG00000111078.1	0	0	0	0	0	0	0	0	0	0	0	0	0	0	0	0	0	0	0	0	0	0	0	0	0	0	0	0	0	0	0	0	0
ENSMUSG00000089941.1	0	0	0	0	0	0	0	0	0	0	0	0	0	0	0	0	0	0	0	0	0	0	0	0	0	0	0	0	0	0	0	0	0
ENSMUSG00000066912.3	0	0	0	0	0	0	0	0	0	0	0	0	0	0	0	0	0	0	0	0	0	0	0	0	0	0	0	0	0	0	0	0	0
ENSMUSG00000105503.1	0	0	0	0	0	0	0	0	0	0	0	0	0	0	0	0	0	0	0	0	0	0	0	0	0	0	0	0	0	0	0	0	0
ENSMUSG00000098162.1	0	0	0	0	0	0	0	0	0	0	0	0	0	0	0	0	0	0	0	0	0	0	0	0	0	0	0	0	0	0	0	0	0
ENSMUSG00000075133.2	0	0	0	0	0	0	0	0	0	0	0	0	0	0	0	0	0	0	0	0	0	0	0	0	0	0	0	0	0	0	0	0	0
ENSMUSG00000092414.1	0	0	0	0	0	0	0	0	0	0	0	0	0	0	0	0	0	0	0	0	0	0	0	0	0	0	0	0	0	0	0	0	0
ENSMUSG00000105986.1	0	0	0	0	0	0	0	0	0	0	1	0	0	1	1	0	0	0	0	0	0	0	0	0	0	0	0	0	0	0	0	0	0
ENSMUSG00000028451.12	0	0	0	0	0	2	0	0	0	0	0	0	0	0	0	0	0	0	2	0	1	0	0	0	0	0	0	0	0	0	0	0	0
ENSMUSG00000017561.16	703	3713	2630	237	229	320	2512	425	240	504	719	404	240	124	234	949	1143	1070	1076	699	604	210	802	500	1303	840	584	358	323	489	545	319	418
ENSMUSG00000103000.1	0	0	0	0	0	0	0	0	0	0	0	0	0	0	0	0	0	0	0	0	0	0	0	0	0	0	0	0	0	0	0	0	0
ENSMUSG00000112270.1	0	0	0	0	0	0	0	0	0	0	0	0	0	0	0	0	0	0	0	0	0	0	0	0	0	0	0	0	0	0	0	0	0
ENSMUSG00000113608.1	0	0	0	0	0	0	0	0	0	0	0	0	0	0	0	0	0	0	0	0	0	0	0	0	0	0	0	0	0	0	0	0	0
ENSMUSG00000057522.15	1220	2493	2314	372	685	1192	1288	439	299	270	571	304	306	67	104	1074	1670	2000	1875	1367	1629	75	593	370	1578	209	144	769	335	814	1931	1284	1040
ENSMUSG00000085055.1	0	0	0	0	0	0	0	0	0	0	0	0	0	0	0	0	0	0	0	0	0	0	0	0	0	0	0	0	0	0	0	0	0
ENSMUSG00000101666.1	0	0	0	0	0	0	0	0	0	0	0	0	0	0	0	0	0	0	0	0	0	0	0	0	0	0	0	0	0	0	0	0	0
ENSMUSG00000015312.9	12	166	27	14	17	29	337	85	101	53	32	131	62	5	19	89	52	48	49	18	44	20	101	41	81	92	36	40	99	16	3	14	29
ENSMUSG00000021733.10	215	818	727	48	17	43	209	61	40	54	99	38	49	11	22	118	400	153	286	129	142	33	68	96	244	78	58	117	30	122	109	91	93
ENSMUSG00000024218.12	39	112	124	8	7	10	289	75	52	66	90	32	33	11	30	71	74	49	32	51	70	13	71	78	131	43	25	22	57	39	1	19	18
ENSMUSG00000088750.1	0	0	0	0	0	0	0	0	0	0	0	0	0	0	0	0	0	0	0	0	0	0	0	0	0	0	0	0	0	0	0	0	0
ENSMUSG00000048949.8	1	12	5	2	9	0	8	3	0	5	7	6	0	2	2	13	0	0	1	3	8	0	7	4	7	0	2	1	1	2	0	0	9
ENSMUSG00000081784.1	0	0	0	0	0	0	0	0	0	0	0	0	0	0	0	0	0	0	0	0	0	0	0	0	0	0	0	0	0	0	0	0	0
ENSMUSG00000095543.2	0	0	0	0	0	0	0	0	0	0	0	0	0	0	0	0	0	0	0	0	0	0	0	0	0	0	0	0	0	0	0	0	0
ENSMUSG00000078262.5	0	0	0	0	0	0	0	0	0	0	0	0	0	0	0	0	0	0	0	0	0	0	0	0	0	0	0	0	0	0	0	0	0
ENSMUSG00000111105.1	0	0	0	0	0	0	0	0	0	0	0	0	0	0	0	0	0	0	0	0	0	0	0	0	0	0	0	0	0	0	0	0	0
ENSMUSG00000106249.1	0	0	0	0	0	0	0	0	0	0	0	0	0	0	0	0	0	0	0	0	0	0	0	0	0	0	0	0	0	0	0	0	0
ENSMUSG00000084939.2	0	0	0	0	0	0	0	0	0	0	0	0	0	0	0	0	0	0	0	0	3	0	0	1	0	0	0	0	0	0	0	0	0
ENSMUSG00000057050.7	0	0	0	0	0	0	0	0	0	0	0	0	0	0	0	0	0	0	0	0	0	0	0	0	0	0	0	0	0	0	0	0	0
ENSMUSG00000086367.1	0	0	0	0	0	0	0	0	0	0	0	0	0	0	0	0	0	0	0	0	0	0	0	0	0	0	0	0	0	0	0	0	0
ENSMUSG00000065155.1	0	0	0	0	0	0	0	0	0	0	0	0	0	0	0	0	0	0	0	0	0	0	0	0	0	0	0	0	0	0	0	0	0
ENSMUSG00000104795.1	1	0	0	0	0	0	2	0	0	0	5	2	0	0	0	4	0	5	0	8	9	0	2	1	0	0	0	0	0	0	0	0	0
ENSMUSG00000091223.2	0	2	0	0	0	0	0	0	0	0	0	0	0	0	0	0	0	0	1	0	0	0	2	0	0	2	0	0	0	0	0	0	0
ENSMUSG00000096855.1	0	0	0	0	0	0	0	0	0	0	0	0	0	0	0	0	0	0	0	0	0	0	0	0	0	0	0	0	0	0	0	0	0
ENSMUSG00000114234.1	0	0	0	0	0	0	0	0	0	0	0	0	0	0	0	0	0	0	0	0	0	0	0	0	0	0	0	0	0	0	0	0	0
ENSMUSG00000109378.1	0	28	0	0	0	0	14	6	2	2	15	2	0	1	1	2	9	2	4	4	0	0	6	5	0	3	3	13	0	0	0	0	6
ENSMUSG00000094352.1	0	0	0	0	0	0	0	0	0	0	0	0	0	0	0	0	0	0	0	0	0	0	0	0	0	0	0	0	0	0	0	0	0
ENSMUSG00000046683.16	0	0	0	0	0	0	0	0	0	0	0	0	0	0	0	0	0	0	0	0	0	0	0	0	0	0	0	0	0	0	0	0	0
ENSMUSG00000112780.1	0	0	0	0	0	0	0	0	0	0	0	0	0	0	0	0	0	0	0	0	0	0	0	0	0	0	0	0	0	0	0	0	0
ENSMUSG00000002489.15	10	4	10	14	0	8	24	13	2	10	18	1	2	2	1	6	18	3	0	10	20	11	26	10	24	8	6	0	0	0	1	7	14
ENSMUSG00000096289.4	0	0	0	0	0	0	0	0	0	0	0	0	0	0	0	0	0	0	0	0	0	0	0	0	0	0	0	0	0	0	0	0	0
ENSMUSG00000083748.1	0	0	0	0	0	0	0	0	0	0	0	0	0	0	0	0	0	0	0	0	0	0	0	0	0	0	0	0	0	0	0	0	0
ENSMUSG00000081811.1	0	0	0	0	0	0	0	0	0	0	0	0	0	0	0	0	0	0	0	0	0	0	0	0	0	0	0	0	0	0	0	0	0
ENSMUSG00000078772.2	0	0	0	0	0	0	0	0	4	0	0	0	0	0	0	0	0	0	0	9	0	0	3	3	2	1	0	0	0	0	12	0	0
ENSMUSG00000024269.11	60	89	295	20	7	32	304	75	57	35	152	57	12	10	8	66	82	44	143	63	49	18	90	76	113	35	14	34	19	47	41	21	32
ENSMUSG00000001014.6	3	0	3	2	6	2	1	0	0	0	0	0	0	0	0	10	0	0	5	10	11	0	2	0	0	1	0	3	2	8	22	8	6
ENSMUSG00000110397.1	0	17	0	0	0	0	0	0	0	0	0	0	0	0	0	0	1	0	8	0	0	0	0	0	0	0	0	0	0	0	0	0	0
ENSMUSG00000036928.14	0	16	0	2	0	12	4	2	0	4	5	0	0	0	1	0	1	1	6	2	4	0	1	3	6	4	1	0	0	0	7	0	0
ENSMUSG00000106759.1	0	0	0	0	0	0	0	0	0	0	0	0	0	0	0	0	0	0	0	0	0	0	0	0	0	0	0	0	0	0	0	0	0
ENSMUSG00000076389.1	0	0	0	0	0	0	0	0	0	0	0	0	0	0	0	0	0	0	0	0	0	0	0	0	0	0	0	0	0	0	0	0	0
ENSMUSG00000081245.2	0	0	0	0	0	0	0	0	0	0	0	0	0	0	0	0	0	0	0	0	0	0	0	0	0	0	0	0	0	0	0	0	0
ENSMUSG00000097481.1	0	0	0	0	0	0	0	0	0	0	0	0	0	0	0	0	0	0	0	0	0	0	0	0	0	0	0	0	0	0	0	0	0
ENSMUSG00000104822.1	0	0	0	0	0	0	0	0	0	0	0	0	0	0	0	0	0	0	0	0	0	0	0	0	0	0	0	0	0	0	0	0	0
ENSMUSG00000077607.1	0	0	0	0	0	0	0	0	0	0	0	0	0	0	0	0	0	0	0	0	0	0	0	0	0	0	0	0	0	0	0	0	0
ENSMUSG00000098819.1	0	0	0	0	0	0	0	0	0	0	0	0	0	0	0	0	0	0	0	0	0	0	0	0	0	0	0	0	0	0	0	0	0
ENSMUSG00000091733.1	0	0	0	0	0	0	0	0	0	0	0	0	0	0	0	0	0	0	0	0	0	0	0	0	0	0	0	0	0	0	0	0	0
ENSMUSG00000113043.1	0	0	0	0	0	0	0	0	0	0	0	0	0	0	0	0	0	0	0	0	0	0	0	0	0	0	0	0	0	0	0	0	0
ENSMUSG00000050855.16	22	74	117	0	0	2	91	30	12	14	53	15	2	1	8	30	40	24	16	11	21	13	26	9	45	10	11	3	9	2	16	0	1
ENSMUSG00000084940.2	0	0	0	0	0	0	0	0	0	0	0	0	0	0	0	0	0	0	0	0	0	0	0	0	0	0	0	0	0	0	0	0	0
ENSMUSG00000050423.11	0	0	0	0	3	0	0	0	0	0	0	0	0	0	0	0	0	0	0	0	0	0	0	0	0	0	0	0	0	0	3	0	0
ENSMUSG00000109405.1	0	0	0	0	0	0	0	0	0	0	0	0	0	0	0	0	0	0	0	0	0	0	0	0	0	0	0	0	0	0	0	0	0
ENSMUSG00000095098.1	3	7	0	0	0	0	3	0	1	4	4	0	2	1	0	5	1	0	0	3	4	0	9	0	6	1	0	0	0	0	5	0	2
ENSMUSG00000016757.10	7	1	21	4	17	0	87	24	24	8	78	9	13	7	10	17	4	43	7	24	22	12	11	19	10	14	5	0	2	0	1	0	1
ENSMUSG00000026080.13	113	155	209	9	8	1	233	32	25	19	109	10	4	6	25	51	67	275	176	59	57	2	32	33	139	37	13	5	20	24	20	43	38
ENSMUSG00000093161.1	0	0	0	0	0	0	0	0	0	0	0	0	0	0	0	0	0	0	0	0	0	0	0	0	0	0	0	0	0	0	0	0	0
ENSMUSG00000037660.5	0	0	0	0	0	0	0	0	0	0	0	0	0	0	0	0	0	0	0	0	0	0	0	0	0	0	0	0	0	0	0	0	0
ENSMUSG00000029205.12	0	0	0	0	0	0	2	0	0	1	302	0	0	0	0	0	0	0	0	0	0	0	0	0	0	1	0	0	6	1	0	0	0
ENSMUSG00000112927.1	0	0	0	0	0	0	0	0	0	0	0	0	0	0	0	0	0	0	0	0	0	0	0	0	0	0	0	0	0	0	0	0	0
ENSMUSG00000109888.1	0	0	0	0	0	0	0	0	0	0	0	0	0	0	0	0	0	0	0	0	0	0	0	0	0	0	0	0	0	0	0	0	0
ENSMUSG00000102439.4	0	0	0	0	0	0	0	0	0	0	0	0	0	0	0	0	0	0	0	0	0	0	0	0	0	0	0	0	0	0	0	0	0
ENSMUSG00000086877.7	1	5	0	0	1	0	13	1	6	2	15	1	1	0	0	2	13	0	4	10	17	0	1	5	8	0	3	0	3	3	4	0	1
ENSMUSG00000100985.1	1	0	42	0	0	0	21	0	5	3	0	2	0	1	2	3	14	0	12	0	1	2	3	2	3	3	1	0	0	0	0	0	0
ENSMUSG00000107951.1	0	1	0	0	0	2	21	3	6	3	1	1	2	1	1	2	6	1	7	4	0	1	2	2	4	2	2	1	0	0	0	1	0
ENSMUSG00000077581.1	0	0	0	0	0	0	0	0	0	0	0	0	0	0	0	0	0	0	0	0	0	0	0	0	0	0	0	0	0	0	0	0	0
ENSMUSG00000096316.7	0	0	0	0	0	0	0	0	0	0	0	0	0	0	0	0	0	0	0	0	0	0	0	0	0	0	0	0	0	0	0	0	0
ENSMUSG00000087020.1	5	18	10	1	1	29	4	1	3	1	0	0	1	0	0	2	18	0	0	5	4	0	3	1	4	4	0	0	0	0	0	4	0
ENSMUSG00000110424.1	10	39	0	0	0	0	17	2	0	0	1	4	0	0	3	0	23	25	58	0	6	0	0	1	1	0	2	12	0	0	2	0	0
ENSMUSG00000105568.1	0	0	0	0	0	0	0	0	0	0	0	0	0	0	0	0	0	0	0	0	0	0	0	0	0	0	0	0	0	0	0	0	0
ENSMUSG00000075198.2	0	0	0	0	0	0	0	0	0	0	0	0	0	0	0	0	0	0	0	0	0	0	0	0	0	0	0	0	0	0	0	0	0
ENSMUSG00000096290.1	0	0	0	0	0	0	0	0	0	0	0	0	0	0	0	0	0	0	0	0	0	0	0	0	0	0	0	0	0	0	0	0	0
ENSMUSG00000097628.1	0	0	0	0	0	0	0	0	0	0	0	0	0	0	0	0	0	0	0	0	0	0	0	0	0	0	0	0	0	0	0	0	0
ENSMUSG00000080054.3	1	0	3	0	2	1	10	4	6	1	3	2	0	0	1	2	1	1	2	4	3	1	2	4	8	1	0	0	0	0	0	0	1
ENSMUSG00000027215.13	351	1012	428	355	640	891	1239	276	216	186	179	185	134	37	80	973	370	745	497	1150	1059	91	308	159	476	311	124	608	455	366	1173	979	1011
ENSMUSG00000085686.1	0	0	0	0	0	0	0	0	0	0	0	0	0	0	0	0	0	0	0	0	0	0	0	0	0	0	0	0	0	0	0	0	0
ENSMUSG00000115007.1	1	0	0	5	24	20	0	1	0	0	6	0	0	0	0	5	14	1	18	25	10	0	7	2	4	1	0	7	6	5	12	3	6
ENSMUSG00000086904.1	0	0	0	0	0	0	0	0	0	0	0	0	0	0	0	0	0	0	0	0	0	0	0	0	0	0	0	0	0	0	0	0	0
ENSMUSG00000031179.14	0	0	0	0	0	0	0	0	0	0	0	0	0	0	0	0	0	0	0	0	0	0	0	0	0	0	0	0	0	0	0	0	0
ENSMUSG00000068082.12	0	0	0	0	0	0	0	0	0	0	0	0	0	0	0	0	0	0	0	0	0	0	0	0	0	0	0	0	0	0	0	0	0
ENSMUSG00000103065.1	0	0	0	0	0	0	0	0	0	0	0	0	0	0	0	0	0	0	0	0	0	0	0	0	0	0	0	0	0	0	0	0	0
ENSMUSG00000014767.16	26	373	575	7	3	68	408	106	52	78	197	70	34	19	40	88	151	165	320	94	72	32	121	97	131	50	44	32	56	44	66	33	36
ENSMUSG00000048411.4	0	0	0	0	0	0	0	0	0	0	0	0	0	0	0	0	0	0	0	0	0	0	0	0	0	0	0	0	0	0	0	0	0
ENSMUSG00000020929.14	107	446	343	47	78	72	1352	342	219	239	330	168	95	43	83	300	187	259	208	198	194	109	313	238	301	226	125	91	121	68	80	67	45
ENSMUSG00000113553.1	0	0	0	0	0	0	0	0	0	0	0	0	0	0	0	0	0	0	0	0	0	0	0	0	0	0	0	0	0	0	0	0	0
ENSMUSG00000108697.1	0	0	0	0	0	0	0	0	0	0	0	0	0	0	0	0	0	0	0	0	0	0	0	0	0	0	0	0	0	0	0	0	0
ENSMUSG00000083183.1	0	0	0	0	0	0	0	0	0	0	0	0	0	0	0	0	0	0	0	0	0	0	0	0	0	0	0	0	0	0	0	0	0
ENSMUSG00000095125.2	0	0	0	0	0	0	0	0	0	0	0	0	0	0	0	0	0	0	0	0	0	0	0	0	0	0	0	0	0	0	0	0	0
ENSMUSG00000106760.1	0	0	0	0	0	0	0	0	0	0	0	0	0	0	0	0	0	0	0	0	0	0	0	0	0	0	0	0	0	0	0	0	0
ENSMUSG00000035620.15	94	193	343	1	2	1	158	41	1	43	152	31	32	6	17	74	152	126	204	53	52	9	77	90	114	31	46	30	19	16	29	10	21
ENSMUSG00000041445.9	20	0	0	0	0	0	6	9	3	1	2	9	0	0	0	3	0	0	0	1	0	0	1	18	10	1	1	0	0	0	0	0	0
ENSMUSG00000102949.1	0	0	0	0	0	0	0	0	0	0	0	0	0	0	0	0	0	0	0	0	0	0	0	0	0	0	0	0	0	0	0	0	0
ENSMUSG00000053801.18	47	84	121	1	0	19	242	75	48	41	73	49	31	5	17	55	55	15	27	43	13	14	42	49	81	44	39	6	13	5	0	8	7
ENSMUSG00000015377.9	18	83	48	3	0	2	29	14	17	10	61	11	19	8	6	31	20	0	30	17	9	3	29	14	32	22	8	13	12	2	22	11	1
ENSMUSG00000109915.1	0	0	0	0	0	0	0	0	0	0	0	0	0	0	0	0	0	0	0	0	0	0	0	0	0	0	0	0	0	0	0	0	0
ENSMUSG00000093671.1	0	0	0	0	0	0	0	0	0	0	0	0	0	0	0	0	0	0	0	0	0	0	0	0	0	0	0	0	0	0	0	0	0
ENSMUSG00000007476.18	1	0	0	3	0	0	24	11	8	5	11	2	0	4	0	2	3	10	20	4	8	0	2	19	19	5	6	1	8	0	0	3	6
ENSMUSG00000106194.1	0	0	0	0	0	0	0	0	0	0	0	0	0	1	0	0	0	0	0	0	0	0	0	0	0	0	0	0	0	0	0	0	0
ENSMUSG00000044574.5	0	0	0	0	0	0	0	0	0	0	0	0	0	0	0	0	0	0	0	0	0	0	0	0	0	0	0	0	0	0	0	0	0
ENSMUSG00000091288.1	0	0	0	0	0	0	0	0	0	0	0	0	0	0	0	0	0	0	0	0	0	0	0	0	0	0	0	0	0	0	0	0	0
ENSMUSG00000082018.2	0	0	0	0	0	0	0	0	0	0	0	0	0	0	0	0	0	0	0	0	0	0	0	0	0	0	0	0	0	0	0	0	0
ENSMUSG00000098254.1	0	0	0	0	0	0	0	0	0	0	0	0	0	0	0	0	0	0	0	0	0	0	0	0	0	0	0	0	0	0	0	0	0
ENSMUSG00000049680.17	58	149	133	5	2	8	281	81	36	73	99	50	38	32	38	92	49	95	44	33	59	15	124	80	65	73	46	9	32	37	0	18	13
ENSMUSG00000032999.10	0	0	0	0	0	0	0	1	0	1	0	0	0	0	0	0	0	0	0	0	0	0	0	1	6	0	0	0	0	0	0	0	0
ENSMUSG00000092506.1	0	0	0	0	0	0	0	0	0	0	0	0	0	0	0	0	0	0	0	0	0	0	0	0	0	0	0	0	0	0	0	0	0
ENSMUSG00000033850.5	0	0	0	0	0	0	0	0	0	0	0	0	0	0	0	0	0	0	0	0	0	0	0	0	0	0	0	0	0	0	0	0	0
ENSMUSG00000034557.14	88	330	134	9	4	10	80	27	0	37	18	1	11	3	5	62	204	7	210	16	25	9	142	124	172	23	18	71	25	22	81	74	58
ENSMUSG00000085713.1	0	0	0	0	0	0	0	0	0	0	0	0	0	0	0	0	0	0	0	0	0	0	0	0	0	0	0	0	0	0	0	0	0
ENSMUSG00000000326.12	584	174	98	52	156	23	400	259	68	424	150	32	31	42	80	231	82	95	59	125	215	16	339	236	452	56	47	33	63	73	48	63	90
ENSMUSG00000054013.6	0	0	0	0	0	0	0	0	0	0	0	0	0	0	0	0	0	0	0	0	0	0	0	0	0	0	0	0	0	0	0	0	0
ENSMUSG00000114299.1	0	0	0	0	0	0	0	0	0	0	0	0	0	0	0	0	0	0	0	0	0	0	0	0	0	0	0	0	0	0	0	0	0
ENSMUSG00000112362.1	0	0	0	0	0	0	0	0	0	0	0	0	0	0	0	0	0	0	0	0	0	0	0	0	0	0	0	0	0	0	0	0	0
ENSMUSG00000053852.11	0	0	0	0	0	13	0	0	0	0	0	0	0	0	0	0	0	0	0	0	0	0	0	0	0	0	0	0	0	0	0	0	0
ENSMUSG00000031640.11	0	0	0	0	0	0	0	0	0	0	0	0	0	0	0	0	0	0	0	0	0	0	0	0	0	0	0	0	0	0	0	0	0
ENSMUSG00000059645.6	0	0	0	0	0	0	0	0	0	0	0	0	0	0	0	0	0	0	0	0	0	0	0	0	0	0	0	0	0	0	0	0	0
ENSMUSG00000108724.1	0	0	0	0	0	0	0	2	0	1	0	0	0	0	0	1	0	0	0	0	0	0	0	1	0	0	3	0	0	0	0	0	0
ENSMUSG00000083210.1	0	0	0	0	0	0	0	0	0	0	0	0	0	0	0	0	0	0	0	0	0	0	0	0	0	0	0	0	0	0	0	0	0
ENSMUSG00000078354.1	0	0	0	0	0	0	0	0	0	0	0	0	0	0	0	0	0	0	0	0	0	0	0	0	0	0	0	0	0	0	0	0	0
ENSMUSG00000101758.1	0	0	0	0	0	0	0	0	0	0	0	0	0	0	0	0	0	0	0	0	0	0	0	0	0	0	0	0	0	0	0	0	0
ENSMUSG00000092480.1	0	0	0	0	0	0	0	0	0	0	0	0	0	0	0	0	0	0	0	0	0	0	0	0	0	0	0	0	0	0	0	0	0
ENSMUSG00000093818.1	0	0	0	0	0	0	0	0	0	0	0	0	0	0	0	0	0	0	0	0	0	0	0	0	0	0	0	0	0	0	0	0	0
ENSMUSG00000088842.1	0	0	0	0	0	0	0	0	0	0	0	0	0	0	0	0	0	0	0	0	0	0	0	0	0	0	0	0	0	0	0	0	0
ENSMUSG00000081876.1	0	0	0	0	0	0	0	0	0	0	0	0	0	0	0	0	0	0	0	0	0	0	0	0	0	0	0	0	0	0	0	0	0
ENSMUSG00000020548.10	0	0	0	0	0	0	0	0	0	0	0	0	0	0	0	0	0	0	0	0	0	0	0	0	0	0	0	0	0	0	0	0	0
ENSMUSG00000038156.16	0	0	0	7	19	2	364	42	14	40	22	11	9	2	4	32	16	23	6	12	3	31	59	110	22	26	29	3	0	7	0	1	0
ENSMUSG00000022106.14	234	267	376	32	46	62	770	149	101	155	912	112	64	44	75	158	343	187	247	100	110	56	234	172	315	86	61	102	43	75	88	48	50
ENSMUSG00000064310.10	0	0	0	0	0	0	0	0	0	0	0	0	0	0	0	0	0	0	0	0	0	0	0	0	0	0	0	0	0	0	0	0	0
ENSMUSG00000106221.1	0	0	0	0	0	0	0	0	0	0	0	0	0	0	0	0	0	0	0	0	0	0	0	0	0	0	0	0	0	0	0	0	0
ENSMUSG00000115491.1	0	0	0	0	0	0	0	0	0	0	0	0	0	0	0	0	0	0	0	0	0	0	0	0	0	0	0	0	0	0	0	0	0
ENSMUSG00000091315.1	2	0	0	0	0	0	0	0	0	0	0	0	0	0	0	0	0	0	0	3	0	0	0	0	0	0	0	0	0	0	0	0	0
ENSMUSG00000097063.3	0	0	0	0	0	0	0	0	0	0	0	0	0	0	0	0	0	0	0	0	0	0	0	0	0	0	0	0	0	0	0	0	0
ENSMUSG00000086459.2	0	0	0	0	0	0	0	0	0	0	0	0	0	0	0	0	0	0	0	0	0	0	0	0	0	0	0	0	0	0	0	0	0
ENSMUSG00000104887.1	0	0	0	0	0	0	0	0	0	0	0	0	0	0	0	0	0	0	0	0	0	0	0	0	0	0	0	0	0	0	0	0	0
ENSMUSG00000102950.1	0	0	0	0	0	0	0	0	0	0	0	0	0	0	0	0	0	0	0	0	0	0	0	0	0	0	0	0	0	0	0	0	0
ENSMUSG00000022791.16	25	132	40	3	4	30	142	54	18	39	122	20	12	12	17	72	59	65	56	34	25	18	60	28	78	42	15	19	32	22	10	3	19
ENSMUSG00000096947.1	0	0	0	0	0	0	0	0	0	0	0	0	0	0	0	0	0	0	0	0	0	0	0	0	0	0	0	0	0	0	0	0	0
ENSMUSG00000111171.1	0	0	0	0	0	1	2	10	0	11	3	0	0	1	1	1	0	0	0	5	8	0	8	7	12	0	0	0	0	0	0	0	0
ENSMUSG00000090097.8	0	0	0	0	0	0	0	0	0	0	0	0	0	0	0	0	0	0	0	0	0	0	0	0	0	0	0	0	0	0	0	0	0
ENSMUSG00000114326.1	0	0	0	2	0	2	0	0	0	0	0	0	0	0	0	1	1	0	0	0	2	0	0	0	0	0	1	0	0	2	0	1	0
ENSMUSG00000102384.1	0	0	0	0	0	0	0	0	0	0	0	0	0	0	0	0	0	0	0	0	0	0	0	0	0	0	0	0	0	0	0	0	0
ENSMUSG00000107533.1	0	0	0	0	0	0	0	0	0	0	0	0	0	0	0	0	0	0	0	0	0	0	0	0	0	0	0	0	0	0	0	0	0
ENSMUSG00000037242.8	1647	2240	2142	123	53	355	1864	641	459	249	516	543	555	196	231	694	1217	1929	1990	261	334	163	1045	526	2980	248	219	290	131	308	285	128	127
ENSMUSG00000089588.1	0	0	0	0	0	0	0	0	0	0	0	0	0	0	0	0	0	0	0	0	0	0	0	0	0	0	0	0	0	0	0	0	0
ENSMUSG00000112872.1	0	0	0	0	0	0	0	0	0	0	0	0	0	0	0	0	0	0	0	0	0	0	0	0	0	0	0	0	0	0	0	0	0
ENSMUSG00000094444.2	0	0	0	0	0	0	0	0	0	0	0	0	0	0	0	0	0	0	0	0	0	0	0	0	0	0	0	0	0	0	0	0	0
ENSMUSG00000081903.1	0	0	0	0	0	0	0	0	0	0	0	0	0	0	0	0	0	0	0	0	0	0	0	0	0	0	0	0	0	0	0	0	0
ENSMUSG00000028654.13	0	0	0	0	25	14	6	4	1	1	1	1	0	0	3	3	0	0	0	0	4	0	11	5	5	1	0	0	0	0	0	5	1
ENSMUSG00000110006.1	0	0	0	0	0	0	0	0	0	0	0	0	0	0	0	0	0	0	0	0	0	0	0	0	0	0	0	0	0	0	0	0	0
ENSMUSG00000105030.1	0	0	0	0	0	0	0	0	0	0	0	0	0	0	0	0	0	0	0	0	0	0	0	0	0	0	0	0	0	0	0	0	0
ENSMUSG00000031691.14	72	423	131	34	15	71	500	115	66	104	310	89	36	24	38	172	121	89	188	116	104	20	174	117	173	110	56	61	59	76	107	26	65
ENSMUSG00000092990.1	0	0	0	0	0	0	0	0	0	0	0	0	0	0	0	0	0	0	0	0	0	0	0	0	0	0	0	0	0	0	0	0	0
ENSMUSG00000071415.6	8348	13001	18131	2107	2398	5806	22681	6755	4154	4825	5010	2986	2421	934	1937	7131	8799	8008	10102	9785	10479	853	5515	6008	14615	2571	2637	3503	2887	4920	5983	4070	3512
ENSMUSG00000099027.1	0	0	0	0	0	0	0	0	0	0	0	0	0	0	0	0	0	0	0	0	0	0	0	0	0	0	0	0	0	0	0	0	0
ENSMUSG00000110489.1	0	0	0	0	0	0	0	0	0	0	0	1	0	0	0	0	0	0	0	0	0	0	0	0	0	0	1	0	0	0	0	0	0
ENSMUSG00000087085.1	0	0	0	0	0	0	0	0	0	0	0	0	0	0	0	0	0	0	0	0	0	0	0	0	0	0	0	0	0	0	0	0	0
ENSMUSG00000042581.14	0	0	0	0	0	0	0	0	0	1	0	0	0	0	1	0	0	0	0	6	0	0	0	0	0	0	0	0	0	0	8	0	0
ENSMUSG00000103696.1	0	0	0	0	0	0	0	0	0	0	0	0	0	0	0	2	0	0	0	0	0	0	0	0	0	0	0	0	0	0	0	0	0
ENSMUSG00000024135.9	73	129	152	2	4	17	241	80	23	30	111	37	24	4	22	84	104	54	74	72	60	27	83	86	131	50	30	39	20	17	30	48	10
ENSMUSG00000104914.1	0	0	0	0	0	0	0	0	0	0	0	0	0	0	0	0	0	0	0	0	0	0	0	0	0	0	0	0	0	0	0	0	0
ENSMUSG00000097573.2	0	0	0	0	0	0	3	2	0	1	1	0	0	0	0	1	0	0	0	0	0	0	4	0	0	0	0	0	0	0	0	0	0
ENSMUSG00000086969.1	0	0	0	0	0	0	0	0	0	0	0	0	0	0	0	0	0	0	0	0	0	0	0	0	0	0	0	0	0	0	0	0	0
ENSMUSG00000113135.1	0	0	0	0	0	0	0	0	0	0	0	0	0	0	0	0	0	0	0	0	0	0	0	0	0	0	0	0	0	0	0	0	0
ENSMUSG00000090124.7	39	291	44	30	0	38	137	28	31	97	12	42	18	8	16	43	119	91	65	16	46	25	153	75	158	49	65	35	9	62	56	9	18
ENSMUSG00000108279.1	0	0	0	0	0	0	0	0	0	0	0	0	0	0	0	0	0	0	0	0	0	0	0	0	0	0	0	0	0	0	0	0	0
ENSMUSG00000021936.14	33	393	159	13	51	21	281	40	31	57	139	41	24	13	28	61	96	89	118	50	42	0	90	67	176	40	21	38	30	22	32	7	43
ENSMUSG00000101193.1	0	0	0	0	0	0	0	0	0	0	0	0	0	0	0	0	0	0	0	0	0	0	0	0	0	0	0	0	0	0	0	0	0
ENSMUSG00000102411.1	0	0	0	0	0	0	0	0	0	0	8	0	0	0	0	0	0	0	0	0	1	6	2	0	0	0	0	0	0	0	0	0	0
ENSMUSG00000037752.4	15	35	9	15	1	20	88	18	9	28	36	16	6	4	4	26	31	38	13	33	11	7	26	24	19	25	6	29	21	17	0	4	10
ENSMUSG00000019373.11	221	436	978	71	19	129	1218	273	133	248	486	200	74	37	88	234	260	227	360	204	168	91	244	261	467	104	74	147	85	154	68	49	62
ENSMUSG00000111681.1	0	0	0	0	0	0	0	0	0	0	0	0	0	0	0	0	0	0	0	0	0	0	0	0	0	0	0	0	0	0	0	0	0
ENSMUSG00000020167.14	15	242	83	6	27	29	277	60	44	77	141	39	25	8	36	202	85	94	123	81	60	22	118	68	153	73	17	18	29	29	47	28	29
ENSMUSG00000082649.1	0	0	0	0	0	0	0	0	0	0	0	0	0	0	0	0	0	0	0	0	0	0	0	0	0	0	0	0	0	0	0	0	0
ENSMUSG00000089615.1	0	0	0	0	0	0	0	0	0	0	0	0	0	0	0	0	0	0	0	0	0	0	0	0	0	0	0	0	0	0	0	0	0
ENSMUSG00000043716.13	13203	27095	31858	3257	6656	10924	28317	10245	6146	5852	9357	4801	3415	936	2724	7564	13322	16734	14377	12683	10797	1581	9535	8111	23965	2970	3239	5726	4497	6481	9927	7370	5933
ENSMUSG00000077673.1	0	0	0	0	0	0	0	0	0	0	0	0	0	0	0	0	0	0	0	0	0	0	0	0	0	0	0	0	0	0	0	0	0
ENSMUSG00000032826.17	17	30	0	0	0	0	0	0	0	0	0	2	0	0	1	0	0	0	0	0	0	0	0	6	0	0	2	0	0	0	0	0	0
ENSMUSG00000100028.1	0	0	0	0	0	0	0	0	0	0	0	0	0	0	0	0	0	0	0	0	0	0	0	0	0	0	0	0	0	0	0	0	0
ENSMUSG00000040591.18	7	0	55	10	0	2	39	7	15	10	22	4	0	3	3	8	0	29	10	7	8	3	2	18	12	2	4	0	2	0	0	10	0
ENSMUSG00000087112.1	0	0	0	0	0	0	0	0	0	0	0	0	0	0	0	0	0	0	0	0	0	0	0	0	0	0	0	0	0	0	0	0	0
ENSMUSG00000110516.1	0	0	0	0	0	0	0	0	0	0	0	0	0	0	0	0	0	0	0	0	0	0	0	0	1	0	0	0	0	0	0	0	0
ENSMUSG00000103723.1	0	0	0	0	0	0	0	0	0	0	0	0	0	0	0	0	0	0	0	0	0	0	0	0	0	0	0	0	0	0	0	0	0
ENSMUSG00000064566.1	0	0	0	0	0	0	0	0	0	0	0	0	0	0	0	0	0	0	0	0	0	0	0	0	0	0	0	0	0	0	0	0	0
ENSMUSG00000090634.1	0	0	0	0	0	0	0	0	0	0	0	0	0	0	0	0	0	0	0	0	0	0	0	0	0	0	0	0	0	0	0	0	0
ENSMUSG00000076508.3	0	0	22	0	2	0	1	9	1	2	3	1	3	0	0	4	12	0	63	12	8	1	4	9	7	4	3	0	0	1	1	1	1
ENSMUSG00000075170.4	0	0	0	0	0	0	0	0	0	0	0	0	0	0	0	0	0	0	0	0	0	0	0	0	0	0	0	0	0	0	0	0	0
ENSMUSG00000052616.10	1	4	14	0	0	0	6	0	0	0	1	1	0	0	0	1	0	1	0	6	0	0	0	0	12	1	0	0	0	4	0	0	11
ENSMUSG00000038015.6	0	0	0	0	0	0	0	0	0	0	0	0	0	0	0	0	0	0	0	0	0	0	0	0	0	0	0	0	0	0	0	0	0
ENSMUSG00000038498.3	0	0	0	0	0	0	0	0	0	0	0	0	0	0	0	0	0	0	0	0	0	0	0	0	0	0	0	0	0	0	0	0	0
ENSMUSG00000019789.9	0	0	0	0	0	0	0	0	0	0	0	0	0	0	0	0	0	0	0	0	1	0	0	0	0	0	0	0	5	0	0	0	0
ENSMUSG00000108306.1	0	0	0	0	0	0	0	0	0	0	0	0	0	0	0	0	0	0	0	0	0	0	1	0	0	0	0	0	0	0	0	0	0
ENSMUSG00000039163.10	88	154	11	16	3	19	330	76	59	68	58	35	10	13	27	28	48	78	38	38	73	3	47	63	126	24	19	26	20	20	5	13	12
ENSMUSG00000101220.1	0	0	0	0	0	0	0	0	0	0	0	0	0	0	0	0	0	0	0	0	0	0	0	0	0	0	0	0	0	0	0	0	0
ENSMUSG00000028273.15	128	340	156	61	65	40	394	134	66	170	149	78	89	30	52	135	254	188	293	130	237	42	169	180	334	104	107	111	110	116	125	77	70
ENSMUSG00000110490.1	0	0	0	0	0	0	0	0	0	0	0	0	0	0	0	0	0	0	0	0	0	0	0	0	0	0	0	0	0	0	0	0	0
ENSMUSG00000095217.1	3	10	2	0	1	0	8	2	1	0	4	3	13	0	0	6	6	12	16	3	0	0	6	1	18	0	0	0	0	0	1	0	0
ENSMUSG00000113645.1	0	0	0	0	0	0	0	0	0	0	0	0	0	0	0	0	0	0	0	0	0	0	0	0	0	0	0	0	0	0	0	0	0
ENSMUSG00000083275.1	0	0	0	0	0	0	0	0	0	0	0	0	0	0	0	0	0	0	0	0	0	0	0	0	0	0	0	0	0	0	0	0	0
ENSMUSG00000048503.7	0	0	0	0	0	0	0	0	0	0	1	0	0	0	0	0	0	0	0	0	0	0	0	2	3	0	0	0	0	0	0	0	0
ENSMUSG00000063506.14	3	0	0	0	0	0	10	3	1	2	13	0	2	0	0	1	0	55	0	0	2	0	12	10	2	0	0	0	0	1	0	0	0
ENSMUSG00000036561.8	18	211	29	8	26	49	180	31	21	52	127	35	13	16	27	67	44	66	166	50	63	41	76	46	91	39	19	43	33	37	18	17	43
ENSMUSG00000077700.1	0	0	0	0	0	0	0	0	0	0	0	0	0	0	0	0	0	0	0	0	0	0	0	0	0	0	0	0	0	0	0	0	0
ENSMUSG00000093763.1	0	0	0	0	0	0	0	0	0	0	0	0	0	0	0	0	0	0	0	0	0	0	0	0	0	0	0	0	0	0	0	0	0
ENSMUSG00000115073.1	0	0	0	0	0	0	0	0	0	0	0	0	0	0	0	0	0	0	0	0	0	0	0	0	0	0	0	0	0	0	0	0	0
ENSMUSG00000046000.5	0	0	0	0	0	0	0	0	0	0	0	0	0	0	0	0	0	0	0	0	0	0	0	0	0	1	0	0	0	0	0	0	0
ENSMUSG00000104469.1	0	0	0	0	0	0	0	0	0	0	0	0	0	0	0	0	0	0	0	0	0	0	0	0	0	0	0	0	0	0	0	0	0
ENSMUSG00000067212.8	909	2769	1511	711	737	784	9646	3522	2540	2538	1591	2784	1468	600	1076	4173	2091	2318	1847	1686	2021	601	3687	2101	3903	2684	1238	1100	843	845	1015	751	921
ENSMUSG00000098346.1	0	0	0	0	0	0	0	0	0	0	0	0	0	0	0	0	0	0	0	0	0	0	0	0	0	0	0	0	0	0	0	0	0
ENSMUSG00000021555.15	112	399	392	45	37	26	539	128	75	77	209	90	25	16	33	101	97	336	159	76	98	43	141	129	188	93	56	99	25	49	68	32	21
ENSMUSG00000114957.1	0	0	0	0	0	0	0	0	0	0	0	0	0	0	0	0	0	0	0	0	0	0	0	0	0	0	0	0	0	0	0	0	0
ENSMUSG00000049249.2	0	0	0	0	0	0	0	0	0	0	0	0	0	0	0	0	0	0	0	0	0	0	0	0	0	0	0	0	0	0	0	0	0
ENSMUSG00000029408.13	18	0	6	7	3	7	173	17	11	13	27	9	0	3	4	21	6	0	30	12	5	11	1	4	26	22	4	2	29	2	6	8	7
ENSMUSG00000048495.16	5	99	129	3	0	0	166	40	23	28	35	25	17	6	12	33	59	13	27	33	20	6	19	31	50	7	16	3	9	14	51	12	5
ENSMUSG00000109981.1	0	0	0	0	0	0	0	0	0	0	0	0	0	0	0	0	0	0	0	0	0	0	0	0	0	0	0	0	0	0	0	0	0
ENSMUSG00000021123.12	7	126	136	36	5	4	537	96	61	109	28	73	19	20	44	51	76	45	74	33	47	19	92	68	99	81	98	0	17	42	13	1	5
ENSMUSG00000085805.1	0	0	0	0	0	0	0	0	0	0	0	0	0	0	0	0	0	0	0	0	0	0	0	0	0	0	0	0	0	0	0	0	0
ENSMUSG00000026923.15	32	0	37	6	8	17	100	36	44	15	59	25	21	5	11	27	4	46	20	23	26	9	25	18	41	30	24	21	12	18	0	4	1
ENSMUSG00000041777.11	420	618	618	159	203	445	291	71	68	56	143	41	71	10	14	254	365	583	448	691	545	32	95	53	470	18	37	334	167	285	1027	597	540
ENSMUSG00000094026.1	0	0	0	0	0	0	0	0	0	0	0	0	0	0	0	0	0	0	0	0	0	0	0	0	0	0	0	0	0	0	0	0	0
ENSMUSG00000037813.13	0	0	1	0	0	0	0	0	0	0	0	0	0	0	0	0	0	0	0	0	0	0	0	0	0	0	0	0	0	0	0	0	0
ENSMUSG00000026100.6	0	0	0	0	0	0	0	0	0	0	0	0	0	0	0	0	0	0	0	0	0	0	0	0	0	0	0	0	0	0	0	0	0
ENSMUSG00000112454.1	0	0	0	0	0	0	0	0	0	0	0	0	0	0	0	0	0	0	0	0	0	0	0	0	0	0	0	0	0	0	0	0	0
ENSMUSG00000107598.1	0	0	0	0	0	0	0	0	0	0	0	0	0	0	0	0	0	0	0	0	0	0	0	0	0	0	0	0	0	0	0	0	0
ENSMUSG00000082084.1	0	0	0	0	0	0	0	0	0	0	0	0	0	0	0	0	0	0	0	0	0	0	0	0	0	0	0	0	0	0	0	0	0
ENSMUSG00000089050.1	0	0	0	0	0	0	0	0	0	0	0	0	0	0	0	0	0	0	0	0	0	0	0	0	0	0	0	0	0	0	0	0	0
ENSMUSG00000108816.1	0	0	0	0	0	0	0	0	0	0	0	0	0	0	0	0	0	0	0	0	0	0	0	0	0	0	0	0	0	0	0	0	0
ENSMUSG00000081968.1	0	0	0	0	0	0	0	0	0	0	0	0	0	0	0	0	0	0	0	0	0	0	0	0	0	0	0	0	0	0	0	0	0
ENSMUSG00000115100.1	0	0	0	0	0	0	0	1	0	0	2	0	0	0	0	0	0	0	0	0	0	0	0	1	0	0	0	0	0	0	0	0	0
ENSMUSG00000105095.1	9	4	25	0	0	11	11	4	3	0	7	4	0	1	1	5	0	0	0	2	0	3	2	2	9	1	2	0	0	0	0	0	1
ENSMUSG00000067722.3	40	215	174	11	6	31	236	65	74	38	125	30	38	9	20	84	81	38	80	55	63	12	94	65	102	29	21	5	29	38	24	14	10
ENSMUSG00000097155.1	0	0	0	0	0	0	0	0	0	0	0	0	0	0	0	0	0	0	0	0	0	0	0	0	0	0	0	0	0	0	0	0	0
ENSMUSG00000092572.7	331	777	1055	29	10	148	268	408	42	502	92	32	76	44	122	212	614	617	460	218	320	13	798	429	1499	22	53	98	29	196	58	106	94
ENSMUSG00000060756.5	0	0	0	0	0	0	0	0	0	0	0	0	0	0	0	0	0	0	0	0	0	0	0	0	0	0	0	0	0	0	0	0	0
ENSMUSG00000057234.9	45	36	60	16	10	6	61	8	3	15	24	5	7	1	3	12	46	43	51	20	22	4	10	5	35	1	5	25	8	7	45	34	45
ENSMUSG00000091407.1	0	0	0	0	0	0	0	0	0	0	0	0	0	0	0	0	0	0	0	0	0	0	0	0	0	0	0	0	0	0	0	0	0
ENSMUSG00000018569.12	0	0	0	0	0	0	0	0	0	0	1	0	0	0	0	0	0	0	0	0	0	0	0	3	0	0	0	0	0	0	0	0	0
ENSMUSG00000104979.1	0	0	0	0	0	0	0	0	0	0	0	0	0	0	0	0	0	0	0	0	0	0	0	0	0	0	0	0	0	0	0	0	0
ENSMUSG00000086431.1	0	0	0	0	0	0	0	0	0	0	0	0	0	0	0	0	0	0	0	0	0	0	0	0	0	0	0	0	0	0	0	0	0
ENSMUSG00000037334.2	0	0	0	0	0	0	0	0	0	0	0	0	0	0	0	0	0	0	0	0	0	0	0	0	0	0	0	0	0	0	0	0	0
ENSMUSG00000111263.1	0	0	0	0	0	0	0	0	0	0	0	0	0	0	0	0	0	0	0	0	0	0	0	0	0	0	0	0	0	0	0	0	0
ENSMUSG00000084048.1	0	0	0	0	0	0	0	0	0	0	0	0	0	0	0	0	0	0	0	0	0	0	0	0	0	0	0	0	0	0	0	0	0
ENSMUSG00000082111.1	0	0	0	0	0	0	0	0	0	0	0	0	0	0	0	0	0	0	0	0	0	0	0	0	0	0	0	0	0	0	0	0	0
ENSMUSG00000028100.11	3	0	0	4	0	5	9	19	15	45	19	4	1	2	6	21	0	2	3	13	12	2	15	8	22	2	7	4	2	9	0	0	5
ENSMUSG00000100659.1	0	0	0	0	0	0	0	0	0	0	0	0	0	0	0	0	0	0	0	0	0	0	0	0	0	0	0	0	0	0	0	0	0
ENSMUSG00000017210.14	37	171	136	33	65	159	418	40	52	65	143	44	16	14	28	168	42	47	118	119	140	32	107	48	88	70	21	55	20	53	26	83	57
ENSMUSG00000107625.1	0	0	0	0	0	0	0	0	0	0	0	0	0	0	0	0	0	0	0	0	0	0	0	0	0	0	0	0	0	0	0	0	0
ENSMUSG00000063885.5	0	0	0	0	0	0	0	0	0	0	0	0	0	0	0	0	0	0	0	0	0	0	0	0	0	0	0	0	0	0	0	0	0
ENSMUSG00000082594.1	0	0	0	0	0	0	0	0	0	0	0	0	0	0	0	0	0	0	0	0	0	0	0	0	0	0	0	0	0	0	0	0	0
ENSMUSG00000089560.1	0	0	0	0	0	0	0	0	0	0	0	0	0	0	0	0	0	0	0	0	0	0	0	0	0	0	0	0	0	0	0	0	0
ENSMUSG00000047822.8	20	0	0	2	0	0	0	0	0	0	0	0	0	0	0	0	0	0	0	0	0	0	3	2	5	0	0	1	0	0	0	0	0
ENSMUSG00000056043.5	0	0	0	0	0	0	1	0	0	0	0	0	0	2	0	1	0	0	0	0	0	0	0	0	0	0	0	0	0	0	0	0	0
ENSMUSG00000105122.1	0	0	0	0	0	0	0	0	0	0	0	0	0	0	0	0	0	0	0	0	0	0	0	0	0	0	0	0	0	0	0	0	0
ENSMUSG00000114392.1	0	0	0	0	0	0	0	0	0	0	0	0	0	0	0	0	0	0	0	0	0	0	0	0	0	0	0	0	0	0	0	0	0
ENSMUSG00000078956.3	8	0	0	0	0	0	0	0	0	1	0	0	0	0	0	4	0	0	0	0	1	0	0	0	22	0	0	0	0	2	0	0	0
ENSMUSG00000032064.17	14	0	0	0	0	0	5	4	2	2	0	2	0	1	4	2	0	17	0	5	1	0	4	10	9	0	1	0	0	4	0	0	0
ENSMUSG00000099119.1	0	0	0	0	0	0	0	0	0	0	0	0	0	0	0	0	0	0	0	0	0	0	0	0	0	0	0	0	0	0	0	0	0
ENSMUSG00000090216.1	0	0	0	0	0	0	4	0	0	0	0	0	0	0	0	0	0	0	0	0	0	0	0	0	0	0	0	0	0	0	0	0	0
ENSMUSG00000115610.1	0	0	0	0	0	0	0	0	0	0	0	0	0	0	0	0	0	0	0	0	0	0	0	0	0	0	0	0	0	0	0	0	0
ENSMUSG00000085240.1	0	0	0	0	0	0	0	0	0	0	0	0	0	0	0	0	0	0	0	0	0	0	0	0	0	0	0	0	0	0	0	0	0
ENSMUSG00000041396.13	58	107	287	9	0	4	140	32	6	21	27	7	6	4	12	37	66	20	55	12	27	0	34	25	88	4	6	15	13	1	7	12	0
ENSMUSG00000103788.1	0	28	0	0	0	34	0	0	0	0	0	0	0	0	0	1	0	0	0	7	0	0	0	0	0	0	0	0	0	0	20	22	0
ENSMUSG00000027469.16	65	63	25	30	63	179	1216	257	100	105	497	130	41	35	68	150	177	249	166	221	184	27	49	136	164	86	49	86	90	81	163	195	89
ENSMUSG00000029859.6	0	0	0	0	0	0	1	2	0	0	0	0	0	0	1	0	0	0	0	0	0	0	0	1	2	0	0	0	0	0	0	0	0
ENSMUSG00000097665.1	0	0	0	0	0	0	0	0	0	0	0	0	0	0	0	0	0	0	0	0	0	0	0	0	0	0	0	0	0	0	0	0	0
ENSMUSG00000090699.1	0	0	0	0	0	0	0	0	0	0	0	0	0	0	0	0	0	0	0	0	0	0	0	0	0	0	0	0	0	0	0	0	0
ENSMUSG00000026110.15	118	558	670	19	25	28	429	202	122	144	301	129	106	23	38	152	278	191	270	176	188	77	156	133	365	120	56	77	96	83	28	52	53
ENSMUSG00000113227.1	0	0	0	0	0	0	0	0	0	0	0	0	0	0	0	0	0	0	0	0	0	0	0	0	0	0	0	0	0	0	0	0	0
ENSMUSG00000087177.7	29	79	252	0	7	0	67	23	26	16	69	19	11	3	10	19	22	52	54	19	8	13	30	31	62	19	19	0	15	9	2	27	0
ENSMUSG00000108251.1	0	0	0	0	0	0	0	0	0	0	0	0	0	0	0	0	0	0	0	0	0	0	0	0	0	0	0	0	0	0	0	0	0
ENSMUSG00000024552.15	0	22	0	0	0	0	1	2	0	0	0	1	1	0	0	0	0	0	0	0	0	0	3	0	6	0	0	0	0	0	0	0	0
ENSMUSG00000093345.2	0	0	0	0	0	0	0	0	0	0	0	0	0	0	0	0	0	0	0	0	0	0	0	0	0	0	0	0	0	0	0	0	0
ENSMUSG00000062694.7	0	0	0	0	0	0	0	0	0	0	0	0	0	0	0	0	0	0	0	0	0	0	0	2	0	0	1	0	0	0	0	0	0
ENSMUSG00000027356.8	10	0	0	0	0	0	0	0	0	0	2	0	0	0	0	0	0	0	0	0	0	0	0	0	0	0	0	0	0	0	0	0	0
ENSMUSG00000089707.1	0	0	0	0	0	0	0	0	0	0	0	0	0	0	0	0	0	0	0	0	0	0	0	0	0	0	0	0	0	0	0	0	0
ENSMUSG00000101285.6	0	0	0	0	0	0	0	0	0	0	0	0	0	0	0	0	0	0	0	0	0	0	0	0	0	0	0	0	0	0	0	0	0
ENSMUSG00000082621.1	0	0	0	0	0	0	0	0	0	0	0	0	0	0	0	0	0	0	0	0	0	0	0	0	0	0	0	0	0	0	0	0	0
ENSMUSG00000050296.14	0	0	0	0	0	0	0	0	0	0	0	0	0	0	0	0	0	0	0	0	0	0	0	0	0	0	0	0	0	0	0	0	0
ENSMUSG00000070799.4	0	0	0	0	0	0	0	0	0	0	0	0	0	0	0	0	0	0	0	0	0	0	0	0	0	0	0	0	0	0	0	0	0
ENSMUSG00000022562.14	11	19	0	6	5	6	21	6	11	5	13	6	3	2	2	13	23	0	1	10	7	0	6	15	31	9	2	0	2	0	0	0	1
ENSMUSG00000087204.1	0	0	0	0	0	0	0	0	0	0	0	0	0	0	0	0	0	0	0	0	0	0	0	0	0	0	0	0	0	0	0	0	0
ENSMUSG00000031209.14	0	0	0	0	0	0	0	0	0	3	2	0	0	0	0	1	0	0	0	0	0	0	0	8	3	0	0	0	0	0	0	0	0
ENSMUSG00000103815.1	0	0	0	0	0	0	0	0	0	0	0	0	0	0	0	0	0	0	0	0	0	0	0	0	0	0	0	0	0	0	0	0	0
ENSMUSG00000061186.15	8	4	1	0	0	27	39	11	20	11	22	14	0	2	4	6	7	8	33	3	3	6	12	4	22	5	5	0	5	6	0	3	2
ENSMUSG00000096474.2	3	3	1	0	2	2	5	0	0	2	3	2	3	0	0	7	6	15	4	2	4	2	1	2	8	3	0	0	0	1	0	1	2
ENSMUSG00000064658.1	0	0	0	0	0	0	0	0	0	0	0	0	0	0	0	0	0	0	0	0	0	0	0	0	0	0	0	0	0	0	0	0	0
ENSMUSG00000112036.1	0	0	0	0	0	0	0	0	0	0	0	0	0	0	0	0	0	0	0	0	0	0	0	0	0	0	0	0	0	0	0	0	0
ENSMUSG00000085750.1	0	2	0	0	0	0	3	0	0	0	1	1	0	0	1	2	0	0	0	0	0	0	0	0	0	0	0	0	0	0	0	0	0
ENSMUSG00000027088.10	106	662	322	21	36	20	512	131	141	95	205	83	63	10	54	127	184	174	157	146	108	23	191	147	351	72	72	44	46	104	43	72	49
ENSMUSG00000107060.1	0	0	0	0	0	0	0	0	0	0	0	0	0	0	0	0	0	0	0	0	0	0	0	0	0	0	0	0	0	0	0	0	0
ENSMUSG00000039747.11	316	828	895	74	9	73	822	197	184	236	458	136	117	41	90	323	259	491	447	164	314	75	446	237	604	196	107	179	127	115	135	78	84
ENSMUSG00000100094.1	46	0	0	0	0	0	0	0	0	0	0	0	0	0	0	0	0	0	0	0	0	0	0	0	7	0	0	0	0	0	0	0	0
ENSMUSG00000090726.4	0	0	0	0	0	0	0	0	0	0	0	0	0	0	0	0	0	0	0	0	0	0	0	0	0	0	0	0	0	0	0	0	0
ENSMUSG00000004837.2	400	1169	1074	68	42	181	2475	487	420	417	693	342	180	113	202	874	432	475	593	337	385	145	672	494	838	478	189	178	260	159	82	111	154
ENSMUSG00000015441.4	0	0	0	0	0	0	0	0	0	0	0	1	0	0	0	0	0	0	0	0	0	0	0	0	0	0	0	0	0	0	0	0	0
ENSMUSG00000101312.1	0	0	0	0	0	0	0	0	0	0	0	0	0	0	0	0	0	0	0	0	0	0	0	0	0	0	0	0	0	0	0	0	0
ENSMUSG00000095309.1	0	0	0	0	0	0	0	0	0	0	0	0	0	0	0	0	0	0	0	0	0	0	0	0	0	0	0	0	0	0	0	0	0
ENSMUSG00000110582.1	0	0	0	0	0	0	0	0	0	0	0	0	0	0	0	0	0	0	0	0	0	0	0	0	0	0	0	0	0	0	0	0	0
ENSMUSG00000083367.1	1	0	8	1	1	0	12	6	0	2	2	1	0	2	2	0	2	1	1	8	0	0	1	0	2	2	1	0	0	4	0	0	0
ENSMUSG00000041629.7	175	195	130	60	91	61	137	30	24	19	34	18	16	4	8	120	68	235	87	87	133	12	61	39	151	18	22	68	31	56	124	114	116
ENSMUSG00000111800.1	0	0	0	0	0	0	0	0	0	0	0	0	0	0	0	0	0	0	0	0	0	0	0	0	0	0	0	0	0	0	0	0	0
ENSMUSG00000106944.1	0	0	0	0	0	0	0	0	0	0	0	0	0	0	0	0	0	0	0	0	0	0	0	0	0	0	0	0	0	0	0	0	0
ENSMUSG00000030905.5	0	0	0	0	0	0	0	0	0	0	0	0	0	0	2	1	2	0	0	0	1	0	0	5	4	0	0	0	0	0	0	0	0
ENSMUSG00000000148.17	26	221	80	7	13	17	258	65	41	54	106	46	10	6	13	106	55	91	121	51	54	26	157	62	114	74	32	40	16	27	14	12	23
ENSMUSG00000088999.1	0	0	0	0	0	0	0	0	0	0	0	0	0	0	0	0	0	0	0	0	0	0	0	0	0	0	0	0	0	0	0	0	0
ENSMUSG00000115165.1	0	0	0	0	0	0	0	0	0	0	0	0	0	0	0	0	0	0	0	0	0	0	0	0	0	0	0	0	0	0	0	0	0
ENSMUSG00000086013.1	20	23	101	0	4	0	37	11	14	3	16	6	0	1	4	12	2	13	27	3	2	0	25	9	14	2	2	2	1	8	9	3	4
ENSMUSG00000104441.1	0	0	0	0	0	0	0	0	0	0	0	0	0	0	0	0	0	0	0	0	0	0	0	0	0	0	0	0	0	0	0	0	0
ENSMUSG00000098438.1	0	0	0	0	0	0	0	0	0	0	0	0	0	0	0	0	0	0	0	0	0	0	0	0	0	0	0	0	0	0	0	0	0
ENSMUSG00000086496.1	0	0	0	0	0	0	0	0	0	0	0	0	0	0	0	0	0	0	0	0	0	0	0	0	0	0	0	0	0	0	0	0	0
ENSMUSG00000003526.11	226	32	14	3	19	0	45	19	4	24	139	6	23	5	7	33	1	18	4	13	19	3	11	19	16	10	8	0	2	3	0	1	5
ENSMUSG00000109024.1	0	0	0	0	0	0	0	0	0	0	0	0	0	0	0	0	0	0	0	0	0	0	0	0	0	0	0	0	0	0	0	0	0
ENSMUSG00000096984.1	0	0	0	0	0	0	0	0	0	0	0	0	0	0	0	0	0	0	0	0	0	0	0	0	0	0	0	0	0	0	0	0	0
ENSMUSG00000100121.1	0	0	0	0	0	0	2	0	0	0	0	0	0	0	0	0	0	0	1	0	0	0	0	1	0	0	0	0	0	0	0	0	3
ENSMUSG00000073955.2	0	0	0	0	0	0	0	0	0	0	0	0	0	0	0	0	0	0	0	0	0	0	0	0	0	0	0	0	0	0	0	0	0
ENSMUSG00000112546.1	0	0	0	0	0	0	4	0	2	0	0	0	0	1	0	1	0	0	0	0	0	1	1	0	1	0	0	0	0	0	0	0	0
ENSMUSG00000082176.1	0	0	0	0	0	0	0	0	0	0	0	0	0	0	0	0	0	0	0	0	0	0	0	0	0	0	0	0	0	0	0	0	0
ENSMUSG00000094118.2	0	0	0	0	0	0	0	0	0	0	0	0	0	0	0	0	0	0	0	0	0	0	0	0	0	0	0	0	0	0	0	0	0
ENSMUSG00000027981.14	9	364	211	44	85	27	204	35	32	53	106	33	0	12	23	76	101	135	169	96	66	29	41	37	177	27	14	35	27	52	140	42	77
ENSMUSG00000107570.1	0	0	0	0	0	0	0	0	0	0	0	0	0	0	0	0	0	0	0	0	0	0	0	0	0	0	0	0	0	0	0	0	0
ENSMUSG00000058491.8	0	0	0	0	0	0	0	0	0	0	0	0	0	0	0	0	0	0	0	0	0	0	0	0	0	0	0	0	0	0	0	0	0
ENSMUSG00000102058.6	0	0	0	0	0	0	0	0	0	0	0	0	0	0	0	0	0	0	0	0	0	0	0	0	0	0	0	0	0	0	0	0	0
ENSMUSG00000044393.15	71	0	0	0	12	0	0	0	0	0	0	1	0	0	1	0	0	0	0	0	0	0	0	0	5	0	0	0	0	0	0	2	0
ENSMUSG00000092664.1	0	0	0	0	0	0	0	0	0	0	0	0	0	0	0	0	0	0	0	0	0	0	0	0	0	0	0	0	0	0	0	0	0
ENSMUSG00000029321.1	0	0	0	0	0	0	0	1	0	21	1	0	0	1	1	1	0	0	0	0	0	0	1	9	2	0	0	0	0	0	0	0	0
ENSMUSG00000099630.1	0	0	0	0	0	0	0	0	0	0	0	0	0	0	0	0	0	0	0	0	0	0	0	0	0	0	0	0	0	0	0	0	0
ENSMUSG00000022181.16	6	0	0	0	4	0	0	1	0	0	0	0	0	0	0	0	0	0	0	0	0	0	0	6	0	0	0	0	0	0	0	0	0
ENSMUSG00000108908.4	0	0	0	0	0	0	0	0	0	0	0	0	0	0	0	0	0	0	0	0	0	0	0	0	0	0	0	0	0	0	0	0	0
ENSMUSG00000081940.1	0	0	0	0	0	0	0	0	0	0	0	0	0	0	0	0	0	0	0	0	0	0	0	0	0	0	0	0	0	0	0	0	0
ENSMUSG00000038591.3	0	0	0	0	0	0	0	0	0	0	0	0	0	0	0	0	0	0	0	0	0	0	0	0	0	0	0	0	0	0	0	0	0
ENSMUSG00000071452.4	0	0	0	0	0	0	0	0	0	0	0	0	0	0	0	0	0	0	0	0	0	0	0	0	0	0	0	0	0	0	0	0	0
ENSMUSG00000105187.1	0	0	0	0	0	0	0	0	0	0	0	0	0	0	0	0	0	0	0	0	0	0	0	0	0	0	0	0	0	0	0	0	0
ENSMUSG00000055872.1	0	0	0	0	0	0	0	0	0	0	0	0	0	0	0	0	0	0	0	0	0	0	0	0	0	0	0	0	0	0	0	0	0
ENSMUSG00000103250.1	0	0	0	0	0	0	0	0	0	0	0	0	0	0	0	0	0	0	0	0	0	0	0	0	0	0	0	0	0	0	0	0	0
ENSMUSG00000115675.1	0	0	0	0	0	0	0	0	0	0	0	0	0	0	0	0	0	0	0	0	0	0	0	0	0	0	0	0	0	0	0	0	0
ENSMUSG00000097247.2	0	0	0	0	0	0	0	0	0	0	0	0	0	0	0	0	0	0	0	0	0	0	0	0	0	0	0	0	0	0	0	0	0
ENSMUSG00000086523.1	0	0	0	0	0	0	0	0	0	0	0	0	0	0	0	0	0	0	0	0	0	0	0	0	0	0	0	0	0	0	0	0	0
ENSMUSG00000065952.13	0	0	0	0	2	0	0	0	0	0	0	0	0	0	0	0	0	0	0	0	0	0	0	0	0	0	0	0	0	0	0	0	0
ENSMUSG00000111355.1	0	0	0	0	0	0	0	0	0	0	0	0	0	0	0	0	0	0	0	0	0	0	0	0	0	0	0	0	0	0	0	0	0
ENSMUSG00000021758.14	0	0	0	0	0	0	5	3	0	3	6	0	0	0	0	1	12	0	24	2	3	0	0	3	3	0	0	9	0	3	14	9	0
ENSMUSG00000082203.1	0	0	0	0	0	0	0	0	0	0	0	0	0	0	0	0	0	0	0	0	0	0	0	0	0	0	0	0	0	0	0	0	0
ENSMUSG00000034206.15	12	14	87	0	0	15	153	54	3	18	70	19	0	0	12	31	7	33	18	17	11	0	6	31	10	12	3	2	4	21	2	19	3
ENSMUSG00000095793.7	0	0	0	0	0	0	0	0	0	0	0	0	0	0	0	0	0	0	0	0	0	0	0	0	0	0	0	0	0	0	0	0	0
ENSMUSG00000093290.1	0	0	0	0	0	0	0	0	0	0	0	0	0	0	0	0	0	0	0	0	0	0	0	0	0	0	0	0	0	0	0	0	0
ENSMUSG00000059588.13	211	345	531	18	47	167	103	42	25	34	124	31	66	17	21	90	225	148	171	117	180	75	60	142	351	35	32	27	39	74	227	96	54
ENSMUSG00000032648.14	7	44	0	7	6	41	108	4	10	12	20	8	5	5	8	22	15	0	28	6	8	4	15	13	22	8	8	11	0	6	0	10	3
ENSMUSG00000020831.18	0	0	1	0	0	0	0	0	0	1	0	1	0	0	0	3	0	0	9	0	0	0	3	0	1	0	0	0	0	0	0	0	0
ENSMUSG00000082686.1	0	0	0	0	0	0	0	0	0	0	0	0	0	0	0	0	0	0	0	0	0	0	0	0	0	0	0	0	0	0	0	0	0
ENSMUSG00000034891.13	0	0	0	0	0	0	0	0	0	0	0	0	0	0	0	0	0	0	0	0	0	0	0	0	0	0	0	0	0	0	0	0	0
ENSMUSG00000025484.9	112	262	216	40	46	30	478	105	96	125	89	55	13	18	43	164	98	120	126	89	85	38	133	142	278	103	69	72	67	55	52	51	26
ENSMUSG00000089652.1	0	0	0	0	0	0	0	0	0	0	0	0	0	0	0	0	0	0	0	0	0	0	0	0	3	0	0	0	0	0	0	0	0
ENSMUSG00000007038.5	162	421	148	34	42	33	591	99	76	220	218	89	40	32	83	268	247	199	257	108	130	51	369	157	288	201	104	117	68	66	66	20	73
ENSMUSG00000054428.12	2125	3013	2452	966	2809	3445	2253	749	599	287	721	359	646	122	157	1280	1787	2716	2346	2245	2194	97	824	293	2642	215	268	1194	868	1726	3448	2807	2250
ENSMUSG00000033589.4	47	74	61	17	1	17	389	93	47	58	118	37	22	9	20	57	21	24	23	35	45	6	82	69	55	41	24	21	23	20	11	17	26
ENSMUSG00000105214.1	0	0	0	0	0	0	0	0	0	0	0	0	0	0	0	0	0	0	0	0	0	0	0	0	0	0	0	0	0	0	0	0	0
ENSMUSG00000114484.1	0	0	0	0	0	0	0	0	0	0	0	0	0	0	0	0	0	0	0	0	0	0	0	0	0	0	0	0	0	0	0	0	0
ENSMUSG00000079164.8	2	19	0	0	2	0	1	7	12	3	1	8	0	1	0	3	0	0	0	0	0	3	11	6	17	5	3	0	0	4	0	0	1
ENSMUSG00000094628.7	0	0	0	0	0	0	0	0	0	0	0	0	0	0	0	0	0	0	0	0	0	0	0	0	0	0	0	0	0	0	0	0	0
ENSMUSG00000087269.1	3	0	31	0	0	2	20	14	0	7	5	5	19	1	1	5	6	6	0	7	3	0	23	4	5	3	7	0	0	0	0	0	0
ENSMUSG00000115702.1	0	0	0	0	0	0	0	0	0	0	0	0	0	0	0	0	0	0	0	0	1	0	0	0	0	0	0	0	0	2	0	0	0
ENSMUSG00000090308.2	0	0	0	0	0	0	0	0	0	0	0	0	0	0	0	0	0	0	0	0	0	0	0	0	0	0	0	0	0	0	0	0	0
ENSMUSG00000103760.1	0	0	0	0	0	0	0	0	0	0	0	0	0	0	0	0	0	0	0	0	0	0	0	0	0	0	0	0	0	0	0	0	0
ENSMUSG00000097757.1	4	0	0	0	0	0	3	0	0	1	9	0	0	1	0	0	0	0	0	0	0	0	0	0	0	0	0	0	4	0	16	0	0
ENSMUSG00000067561.12	0	0	0	0	0	0	0	0	0	0	0	0	0	0	0	0	0	0	0	0	0	0	0	0	0	0	0	0	0	0	0	0	0
ENSMUSG00000095820.1	0	0	0	0	0	0	0	0	0	0	0	0	0	0	0	0	0	0	0	0	0	0	0	0	0	0	0	0	0	0	0	0	0
ENSMUSG00000034807.9	172	1057	940	32	113	73	845	238	102	373	199	92	74	58	105	337	340	283	378	235	291	55	457	397	571	231	130	181	134	181	140	120	141
ENSMUSG00000040621.14	12	0	93	9	0	0	42	6	2	5	33	0	0	1	3	11	8	0	2	21	3	0	8	2	33	7	5	0	0	0	0	0	3
ENSMUSG00000113319.1	0	0	0	0	0	0	0	0	0	0	0	0	0	0	0	0	0	0	0	0	0	0	0	0	0	0	0	0	0	0	0	0	0
ENSMUSG00000101377.1	0	0	0	0	0	0	0	0	0	0	0	0	0	0	0	0	0	0	0	0	0	0	0	0	0	0	0	0	0	0	0	0	0
ENSMUSG00000108343.1	0	0	0	0	0	0	0	0	0	0	0	0	0	0	0	0	0	0	0	0	0	0	0	0	0	0	0	0	0	0	0	0	0
ENSMUSG00000015023.7	0	37	87	0	0	0	78	10	10	17	27	8	0	3	3	15	5	0	7	12	20	8	15	20	10	9	8	0	2	3	0	0	1
ENSMUSG00000046723.4	0	0	0	0	0	0	0	0	0	0	0	0	0	0	0	0	0	0	0	0	0	0	0	0	0	0	0	0	0	0	0	0	0
ENSMUSG00000023367.14	94	72	25	2	8	0	25	71	15	50	30	9	25	9	8	23	27	49	1	9	47	0	30	83	62	9	3	1	7	8	0	1	4
ENSMUSG00000093437.1	0	0	0	0	0	0	0	0	0	0	0	0	0	0	0	0	0	0	0	0	0	0	0	0	0	1	0	0	0	0	0	0	0
ENSMUSG00000034781.5	33	32	23	3	34	10	209	48	32	38	82	22	26	5	17	77	43	83	70	35	46	9	113	68	56	31	17	11	17	4	29	4	17
ENSMUSG00000111865.1	0	0	0	0	0	0	0	0	0	0	0	0	0	0	0	0	0	0	0	0	0	0	0	0	0	0	0	0	0	0	0	0	0
ENSMUSG00000088461.1	0	0	0	0	0	0	0	0	0	0	0	0	0	0	0	0	0	0	0	0	0	0	0	0	0	0	0	0	0	0	0	0	0
ENSMUSG00000081495.1	0	0	0	0	0	0	0	0	0	0	0	0	0	0	0	0	0	0	0	0	0	0	0	0	0	0	0	0	0	0	0	0	0
ENSMUSG00000060843.11	0	0	0	0	0	0	0	1	0	0	0	0	0	0	0	0	0	0	0	0	1	0	0	0	0	0	0	0	0	0	0	0	0
ENSMUSG00000082713.1	0	0	0	0	0	0	0	0	0	0	0	0	0	0	0	0	0	0	0	0	0	0	0	0	0	0	0	0	0	0	0	0	0
ENSMUSG00000077857.1	0	0	0	0	0	0	0	0	0	0	0	0	0	0	0	0	0	0	0	0	0	0	0	0	0	0	0	0	0	0	0	0	0
ENSMUSG00000104023.1	0	0	0	0	0	0	0	0	0	0	0	0	0	0	0	0	0	0	0	0	0	0	0	0	0	0	0	0	0	0	0	0	0
ENSMUSG00000086078.1	0	0	0	0	0	0	0	0	0	0	0	0	0	0	0	0	0	0	0	0	0	0	5	0	0	0	0	0	0	0	0	0	0
ENSMUSG00000091983.3	0	0	0	0	0	0	0	0	0	0	0	0	0	0	0	0	0	0	0	0	0	0	0	0	0	0	0	0	0	0	0	0	0
ENSMUSG00000114511.1	0	0	0	0	0	0	0	0	0	0	0	0	0	0	0	0	0	0	0	0	0	0	0	0	0	0	0	0	0	0	0	0	0
ENSMUSG00000032398.7	198	291	251	45	21	52	567	151	109	152	198	77	15	19	42	91	109	117	126	77	64	14	162	108	286	77	66	68	47	52	27	36	46
ENSMUSG00000103907.1	0	0	0	0	0	0	0	0	0	0	0	0	0	0	0	0	0	0	0	0	0	0	0	0	0	0	0	0	0	0	0	0	0
ENSMUSG00000021377.15	604	1963	1928	111	87	117	2596	698	452	428	1102	431	284	128	254	570	978	510	997	618	604	156	695	593	1244	367	313	286	319	435	353	280	317
ENSMUSG00000053490.8	0	0	0	0	0	0	0	0	0	0	0	0	0	0	0	0	0	0	0	0	0	0	0	0	0	0	0	0	0	0	0	0	0
ENSMUSG00000114994.1	0	0	0	0	0	0	0	0	0	0	0	0	0	0	0	0	0	0	0	0	0	0	0	0	0	0	0	0	0	0	0	0	0
ENSMUSG00000096566.2	0	0	0	0	0	0	0	0	0	0	0	0	0	0	0	0	0	0	0	0	0	0	0	0	0	0	0	0	0	0	0	0	0
ENSMUSG00000058073.4	0	0	0	0	0	0	1	0	0	0	0	0	0	0	0	0	0	0	0	0	0	0	0	0	0	0	0	0	0	0	0	0	0
ENSMUSG00000090818.1	1	0	0	0	0	0	18	0	0	1	15	1	2	0	1	2	7	0	3	1	2	5	0	0	2	0	1	0	0	0	2	0	1
ENSMUSG00000112128.1	0	0	0	0	0	0	0	0	0	0	0	0	0	0	0	0	0	0	0	0	0	0	0	0	0	0	0	0	0	0	0	0	0
ENSMUSG00000109089.1	4	0	0	0	4	0	0	0	0	0	0	0	0	0	0	0	0	0	6	0	0	0	0	2	0	0	0	0	0	0	0	0	0
ENSMUSG00000107152.1	0	0	0	0	0	0	0	0	0	0	55	0	0	0	0	0	0	0	0	0	0	0	0	0	0	0	0	0	0	0	0	0	0
ENSMUSG00000100186.1	0	0	0	0	0	0	0	0	0	0	0	0	0	0	0	0	0	0	0	0	0	0	0	0	0	0	0	0	0	0	0	0	0
ENSMUSG00000101404.1	0	0	0	0	0	0	0	0	0	0	0	0	0	0	0	0	0	0	0	0	0	0	0	0	0	0	0	0	0	0	0	0	0
ENSMUSG00000110674.1	0	0	0	0	0	0	0	0	0	0	0	0	0	0	0	0	0	0	0	0	0	0	0	0	0	0	0	0	0	0	0	0	0
ENSMUSG00000066178.2	0	0	0	0	0	0	2	0	0	0	2	0	0	0	0	0	0	0	0	0	0	0	1	1	0	0	0	0	0	0	0	0	0
ENSMUSG00000003228.8	241	318	266	20	31	24	279	157	84	148	51	68	27	33	35	146	203	159	272	96	125	22	240	119	487	54	47	62	70	53	118	36	67
ENSMUSG00000087270.2	0	0	0	0	1	0	0	0	0	0	1	0	0	0	0	0	0	0	0	1	1	0	0	0	1	1	0	1	0	2	0	4	1
ENSMUSG00000085842.7	0	0	0	0	0	0	0	0	0	0	0	0	0	0	0	0	0	0	0	0	0	0	0	0	0	0	0	0	0	0	0	0	0
ENSMUSG00000094063.4	0	0	0	0	0	0	0	0	0	0	0	0	0	0	0	0	0	0	0	0	0	0	0	0	0	0	0	0	0	0	0	0	0
ENSMUSG00000081522.1	0	0	0	0	0	0	0	0	0	0	0	0	0	0	0	0	0	0	0	0	0	0	0	0	0	0	0	0	0	0	0	0	0
ENSMUSG00000056290.15	1227	2108	4338	233	204	642	10259	1488	707	1202	630	788	385	507	812	1571	1032	783	1436	1473	971	234	754	805	1656	579	593	692	771	728	667	501	423
ENSMUSG00000001774.8	126	954	1308	51	95	127	902	460	283	104	546	216	182	23	50	309	447	471	606	416	398	61	277	214	521	178	141	145	94	237	275	180	163
ENSMUSG00000093947.1	0	0	0	0	0	0	0	0	0	0	0	0	0	0	0	0	0	0	0	0	0	0	0	0	0	0	0	0	0	0	0	0	0
ENSMUSG00000115257.1	0	0	0	0	0	0	0	0	0	0	0	0	0	0	0	0	0	0	0	0	0	0	0	0	0	0	0	0	0	0	0	0	0
ENSMUSG00000088971.1	0	0	0	0	0	0	0	0	0	0	0	0	0	0	0	0	0	0	0	0	0	0	0	0	0	0	0	0	0	0	0	0	0
ENSMUSG00000026313.16	50	135	86	39	2	14	394	62	89	57	68	77	70	17	40	59	48	168	173	41	32	26	112	48	115	86	71	41	16	33	29	20	44
ENSMUSG00000074269.10	7116	8549	6598	628	1845	2312	3178	1613	848	17	1397	369	1519	12	38	2078	6968	7454	7855	4920	4125	15	280	28	3844	25	14	2045	1240	2776	3865	3194	2542
ENSMUSG00000067879.3	0	0	0	0	0	0	0	0	0	0	0	0	0	0	0	0	0	0	0	0	1	0	0	0	0	0	0	0	0	0	0	0	0
ENSMUSG00000086105.1	0	0	0	0	0	0	0	0	0	0	0	0	0	0	0	0	0	0	0	0	0	0	0	0	0	0	0	0	0	0	0	0	0
ENSMUSG00000099695.6	0	0	0	0	0	0	0	0	0	0	0	0	0	0	0	0	0	0	0	0	0	0	0	0	0	0	0	0	0	0	0	0	0
ENSMUSG00000030917.13	22	38	4	4	1	26	80	30	16	20	3	5	25	3	13	17	10	0	1	29	19	0	32	33	33	5	9	6	4	4	5	8	4
ENSMUSG00000104533.1	0	0	0	0	0	0	0	0	0	0	0	0	0	0	0	0	0	0	0	0	0	0	0	0	0	0	0	0	0	0	0	0	0
ENSMUSG00000006574.15	3174	7114	3547	6314	13049	19364	1830	544	329	16	651	142	1003	6	18	11653	6340	14517	6525	21143	19091	231	279	49	3588	489	499	9306	5696	8068	20848	18265	16470
ENSMUSG00000086588.1	0	0	0	0	0	0	0	0	0	0	0	0	0	0	0	0	0	0	0	0	0	0	0	0	0	0	0	0	0	0	0	0	0
ENSMUSG00000084651.1	0	0	0	0	0	0	0	0	0	0	0	0	0	0	0	0	0	0	0	0	0	0	0	0	0	0	0	0	0	0	0	0	0
ENSMUSG00000021701.8	31	77	7	11	19	22	100	27	29	29	7	19	39	2	9	23	14	8	20	9	56	22	40	58	93	43	19	12	14	22	1	35	18
ENSMUSG00000109116.1	0	0	0	0	0	0	0	0	0	0	0	0	0	0	0	0	0	0	0	0	0	0	0	0	0	0	0	0	0	0	0	0	0
ENSMUSG00000100213.1	36	186	121	0	0	0	14	9	4	3	21	8	4	1	2	14	21	0	7	20	3	0	36	9	24	6	4	12	12	9	15	1	11
ENSMUSG00000112638.1	0	0	0	0	0	0	0	0	0	0	0	0	0	0	0	0	0	0	0	0	0	0	0	0	0	0	0	0	0	0	0	0	0
ENSMUSG00000089234.1	0	0	0	0	0	0	0	0	0	0	0	0	0	0	0	0	0	0	0	0	0	0	0	0	0	0	0	0	0	0	0	0	0
ENSMUSG00000082268.1	0	0	0	0	0	0	0	0	0	0	0	0	0	0	0	0	0	0	0	0	0	0	0	0	0	0	0	0	0	0	0	0	0
ENSMUSG00000025066.9	214	359	356	75	63	80	703	136	90	131	193	68	54	28	72	115	180	207	241	119	137	15	165	150	215	71	59	85	33	114	208	67	66
ENSMUSG00000077292.1	0	0	0	0	0	0	0	0	0	0	0	0	0	0	0	0	0	0	0	0	0	0	0	0	0	0	0	0	0	0	0	0	0
ENSMUSG00000100696.1	0	0	0	0	0	0	0	0	0	0	0	0	0	0	0	0	0	0	0	0	0	0	0	0	0	0	0	0	0	0	0	0	0
ENSMUSG00000110701.1	0	0	0	0	0	0	0	0	0	0	0	0	0	0	0	0	0	0	0	0	0	0	0	0	0	0	0	0	0	0	0	0	0
ENSMUSG00000107662.2	0	0	0	0	0	0	0	0	0	0	0	0	0	0	0	0	0	0	0	0	0	0	0	0	0	0	0	0	0	0	0	0	0
ENSMUSG00000028195.4	0	0	0	0	0	0	7	0	0	3	1	0	0	0	2	0	0	0	0	0	0	0	0	11	1	0	0	0	0	0	0	0	0
ENSMUSG00000064751.1	0	0	0	0	0	0	0	0	0	0	0	0	0	0	0	0	0	0	0	0	0	0	0	0	0	0	0	0	0	0	0	0	0
ENSMUSG00000087780.1	0	0	0	0	0	0	0	0	0	0	0	0	0	0	0	0	0	0	0	0	0	0	0	0	0	0	0	0	0	0	0	0	0
ENSMUSG00000078510.3	0	0	0	0	0	0	0	0	0	0	0	0	0	0	0	0	0	0	0	0	0	0	0	0	0	0	0	0	0	0	0	0	0
ENSMUSG00000099722.3	0	0	0	0	0	0	0	0	0	0	0	0	0	0	0	0	0	0	0	0	0	0	0	0	0	0	0	0	0	0	0	0	0
ENSMUSG00000015474.16	5	3	0	3	0	8	13	8	4	5	33	1	0	2	2	4	8	0	23	0	5	0	9	10	12	4	2	0	0	0	0	1	0
ENSMUSG00000066688.4	0	0	0	0	0	0	0	0	0	0	0	0	0	0	0	0	0	0	0	0	0	0	0	0	0	0	0	0	0	0	0	0	0
ENSMUSG00000105279.1	0	0	0	0	0	0	0	0	0	0	0	0	0	0	0	0	0	0	0	0	0	0	0	0	0	0	0	0	0	0	0	0	0
ENSMUSG00000018809.2	21	121	138	27	0	5	240	44	25	43	33	27	5	30	25	74	50	43	15	30	21	15	75	42	165	45	38	7	30	18	6	25	7
ENSMUSG00000076127.1	0	0	0	0	0	0	0	0	0	0	0	0	0	0	0	0	0	0	0	0	0	0	0	0	0	0	0	0	0	0	0	0	0
ENSMUSG00000115767.1	0	0	64	0	0	0	7	4	0	4	2	2	0	1	2	2	0	0	4	0	0	1	4	1	5	0	1	0	6	0	0	0	0
ENSMUSG00000053877.12	1	1	2	0	0	0	3	0	0	0	2	0	0	0	0	0	0	0	4	1	6	0	0	2	0	0	1	0	0	1	0	0	0
ENSMUSG00000085397.1	0	0	0	0	0	0	0	0	0	0	0	0	0	0	0	0	0	0	0	0	0	0	0	0	0	0	0	0	0	0	0	0	0
ENSMUSG00000113830.1	0	0	0	0	0	0	0	0	0	0	0	0	0	0	0	0	0	0	0	0	0	0	0	0	0	0	0	0	0	0	0	0	0
ENSMUSG00000083460.1	0	0	0	0	0	0	0	0	0	0	0	0	0	0	0	0	0	0	0	0	0	0	0	0	0	0	0	0	0	0	0	0	0
ENSMUSG00000095885.1	0	0	0	0	0	0	0	0	0	0	0	0	0	0	0	0	0	0	0	0	0	0	0	0	0	0	0	0	0	0	0	0	0
ENSMUSG00000097339.5	0	0	0	0	0	0	11	0	0	0	0	0	0	0	0	0	0	0	0	0	3	0	0	1	0	0	0	0	0	0	0	0	0
ENSMUSG00000037254.18	701	0	0	0	46	0	0	0	7	0	0	0	0	0	0	0	0	0	0	4	0	0	0	2	60	0	0	0	0	0	0	2	0
ENSMUSG00000035696.15	202	583	804	29	50	140	539	74	45	77	320	105	69	25	45	127	267	450	451	172	118	59	201	111	552	86	75	15	64	119	91	45	106
ENSMUSG00000039901.9	3	28	11	0	0	4	44	11	8	9	13	6	0	0	2	17	15	0	0	0	22	0	12	12	7	6	3	0	1	8	0	0	1
ENSMUSG00000020993.9	164	389	540	31	43	117	476	129	80	108	177	98	46	22	47	100	187	279	169	165	185	8	133	135	242	48	65	115	44	89	139	92	50
ENSMUSG00000088043.1	0	0	0	0	0	0	0	0	0	0	0	0	0	0	0	0	0	0	0	0	0	0	0	0	0	0	0	0	0	0	0	0	0
ENSMUSG00000030536.10	616	2214	1888	228	185	325	2586	765	569	556	675	546	357	98	215	810	992	1121	1217	597	694	267	1051	799	1604	631	508	411	446	436	456	298	210
ENSMUSG00000111447.1	37	1	0	0	0	0	6	1	0	0	2	2	0	2	1	5	6	0	1	0	2	0	7	1	42	0	2	0	0	0	0	0	0
ENSMUSG00000106471.1	0	0	0	0	0	0	0	0	0	0	0	0	0	0	0	0	0	0	0	0	0	0	0	0	0	0	0	0	0	0	0	0	0
ENSMUSG00000107809.1	0	0	0	0	0	0	0	0	0	0	0	0	0	0	0	0	0	0	0	0	0	0	0	0	0	0	0	0	0	0	0	0	0
ENSMUSG00000077439.1	0	0	0	0	0	0	0	0	0	0	0	0	0	0	0	0	0	0	0	0	0	0	0	0	0	0	0	0	0	0	0	0	0
ENSMUSG00000100723.1	0	0	0	0	0	0	0	0	0	0	0	0	0	0	0	0	0	0	0	0	0	0	0	0	0	0	0	0	0	0	0	0	0
ENSMUSG00000065497.1	0	0	0	0	0	0	0	0	0	0	0	0	0	0	0	0	0	0	0	0	0	0	0	0	0	0	0	0	0	0	0	0	0
ENSMUSG00000098531.1	0	0	0	0	0	0	0	0	0	0	0	0	0	0	0	0	0	0	0	0	0	0	0	0	0	0	0	0	0	0	0	0	0
ENSMUSG00000093382.1	0	0	0	0	0	0	0	0	0	0	0	0	0	0	0	0	0	0	0	0	0	0	0	0	0	0	0	0	0	0	0	0	0
ENSMUSG00000028222.2	0	0	0	0	0	0	0	0	0	0	0	0	0	0	0	0	0	0	0	0	0	0	0	0	0	0	0	0	0	0	0	0	0
ENSMUSG00000089744.1	0	0	0	0	0	0	8	1	0	0	1	1	2	2	1	3	0	0	0	2	0	0	0	0	0	0	0	0	0	1	0	0	0
ENSMUSG00000082778.1	1	0	0	0	0	0	1	0	1	0	0	0	0	0	1	0	0	1	0	0	1	0	1	2	0	0	1	0	0	0	0	0	0
ENSMUSG00000104088.1	0	0	0	0	0	0	1	0	0	1	2	0	0	1	0	1	0	0	0	0	0	0	5	2	0	0	4	0	0	0	0	0	0
ENSMUSG00000080841.1	0	0	0	0	0	0	0	0	0	0	0	0	0	0	0	0	0	0	0	0	0	0	0	0	0	0	0	0	0	0	0	0	0
ENSMUSG00000021256.5	0	0	0	0	0	0	0	0	0	0	0	0	0	0	0	0	0	0	0	0	0	0	0	0	0	0	0	0	0	0	0	0	0
ENSMUSG00000105306.1	0	0	0	0	0	0	0	0	0	0	0	0	0	0	0	0	0	0	0	0	0	0	0	0	0	0	0	0	0	0	0	0	0
ENSMUSG00000114576.1	0	7	0	0	0	12	2	1	0	10	1	0	4	1	0	3	0	0	24	0	6	0	11	1	24	0	1	0	0	2	0	0	0
ENSMUSG00000044285.8	83	182	82	24	50	56	170	52	24	5	32	14	29	2	4	93	102	230	119	132	131	3	18	6	165	9	3	96	39	36	148	148	86
ENSMUSG00000085424.1	0	0	0	0	0	0	0	0	0	0	0	0	0	0	0	0	0	0	0	0	0	0	0	0	0	0	0	0	0	0	0	0	0
ENSMUSG00000029310.13	145	176	147	21	69	136	445	102	50	93	106	51	17	14	36	109	81	59	140	150	129	28	135	88	99	58	21	63	27	45	62	126	65
ENSMUSG00000103852.1	0	0	0	0	0	0	0	0	0	0	0	0	0	0	0	0	0	0	0	0	0	0	0	0	0	0	0	0	0	0	0	0	0
ENSMUSG00000073482.2	0	0	0	0	2	0	0	1	0	0	0	0	0	0	0	0	0	0	0	0	0	0	6	0	0	0	0	0	0	0	3	0	0
ENSMUSG00000095912.1	0	0	0	0	0	0	0	0	0	0	0	0	0	0	0	0	0	0	0	0	0	0	0	0	0	0	0	0	0	0	0	0	0
ENSMUSG00000025509.15	44	159	77	53	45	103	316	50	55	66	46	28	45	17	29	110	78	153	119	136	126	10	79	37	112	45	26	87	22	58	80	125	51
ENSMUSG00000038642.10	3188	8838	8695	1196	756	1681	11172	6138	2949	6940	2086	2252	2428	750	1774	5121	5745	6742	5169	3198	4418	745	8040	7507	11677	2398	1795	2474	1321	2622	2273	1554	2127
ENSMUSG00000112073.1	0	0	0	0	0	0	0	0	0	0	0	0	0	0	0	0	0	0	0	0	0	0	0	0	0	0	0	0	0	0	0	0	0
ENSMUSG00000083970.1	0	0	0	0	0	0	0	0	0	0	0	0	0	0	0	0	0	0	0	0	0	0	0	0	0	0	0	0	0	0	0	0	0
ENSMUSG00000062878.3	0	0	0	0	0	0	0	0	0	0	0	0	0	0	0	0	0	0	0	0	0	0	0	0	0	0	0	0	0	0	0	0	0
ENSMUSG00000015093.15	0	0	0	0	0	0	0	0	0	1	0	0	0	0	0	0	0	0	0	4	0	0	0	13	1	0	0	0	0	0	0	0	0
ENSMUSG00000027752.15	174	431	401	27	14	46	1338	264	207	158	275	125	39	39	82	172	123	129	169	155	137	32	144	188	369	169	80	93	54	103	40	71	30
ENSMUSG00000101469.1	0	0	0	0	0	0	0	0	0	0	0	0	0	0	0	0	0	0	0	0	0	0	0	0	0	0	0	0	0	0	0	0	0
ENSMUSG00000108435.1	6	0	0	0	0	0	5	0	0	1	1	4	0	0	1	0	6	0	0	2	0	0	5	0	11	1	1	1	1	3	0	0	1
ENSMUSG00000094694.6	6	33	1	0	0	41	16	19	15	16	6	13	7	1	2	20	16	142	35	11	7	6	10	8	15	19	8	6	0	15	0	17	8
ENSMUSG00000049532.11	2	26	11	6	0	0	17	2	0	5	73	2	0	4	5	4	0	0	7	5	0	0	1	10	9	4	7	3	0	4	10	0	1
ENSMUSG00000092191.1	0	0	0	0	0	0	0	0	0	0	0	0	0	0	0	0	0	0	0	0	0	0	0	0	0	0	0	0	0	0	0	0	0
ENSMUSG00000093529.1	0	0	0	0	0	0	0	0	0	0	0	0	0	0	0	0	0	0	0	0	0	0	0	0	0	0	0	0	0	0	0	0	0
ENSMUSG00000111957.1	0	0	0	0	0	0	0	0	0	0	0	0	0	0	0	0	0	0	0	0	0	0	0	0	0	0	0	0	0	0	0	0	0
ENSMUSG00000088553.1	0	0	0	0	0	0	0	0	0	0	0	0	0	0	0	0	0	0	0	0	0	0	0	0	0	0	0	0	0	0	0	0	0
ENSMUSG00000065524.1	0	0	0	0	0	0	0	0	0	0	0	0	0	0	0	0	0	0	0	0	0	0	0	0	0	0	0	0	0	0	0	0	0
ENSMUSG00000081587.1	0	0	0	0	0	0	0	0	0	0	0	0	0	0	0	0	0	0	0	0	0	0	0	0	0	0	0	0	0	0	0	0	0
ENSMUSG00000106981.1	0	0	1	0	0	0	13	1	6	3	7	5	0	2	0	1	4	1	17	0	0	0	2	4	1	1	0	6	0	0	0	0	0
ENSMUSG00000104115.1	0	0	0	0	0	0	0	0	0	0	0	0	0	0	0	0	0	0	0	0	0	0	0	0	0	0	0	0	0	0	0	0	0
ENSMUSG00000044312.4	0	0	0	0	0	0	0	0	0	0	0	0	0	0	0	0	0	0	0	0	0	0	0	0	0	0	0	0	0	0	0	0	0
ENSMUSG00000005338.13	0	21	0	0	0	0	8	0	0	2	2	0	0	1	0	2	7	6	9	3	0	0	1	3	0	0	0	0	0	1	2	2	0
ENSMUSG00000114603.1	0	0	0	0	0	0	0	0	0	0	0	0	0	1	0	0	0	0	0	0	0	0	0	0	0	0	0	0	0	0	0	0	0
ENSMUSG00000104598.1	0	0	0	0	0	0	0	0	0	0	0	0	0	0	0	0	0	0	0	0	0	0	0	0	0	0	0	0	0	0	0	0	0
ENSMUSG00000102661.1	0	0	0	0	0	0	0	0	0	0	0	0	0	0	0	0	0	0	0	0	0	0	0	0	0	0	0	0	0	0	0	0	0
ENSMUSG00000063021.3	0	0	0	0	0	0	0	1	0	0	1	0	0	0	0	0	0	0	0	0	0	0	0	0	0	0	0	0	0	0	0	0	0
ENSMUSG00000032370.8	266	259	208	42	3	18	474	96	89	96	97	43	29	22	33	155	122	134	216	115	142	18	147	124	274	66	45	51	60	101	106	74	55
ENSMUSG00000039456.9	235	1309	1412	104	66	104	1131	333	110	365	391	379	246	67	124	489	674	890	581	300	370	113	420	383	792	311	247	262	151	229	267	78	174
ENSMUSG00000096658.2	0	0	0	0	0	0	0	0	0	0	0	0	0	0	0	0	0	0	0	0	0	0	0	0	0	0	0	0	0	0	0	0	0
ENSMUSG00000003348.10	628	1425	1048	153	63	263	3232	805	682	487	727	485	380	153	280	980	670	1038	1152	516	329	193	1059	606	1489	568	328	289	328	218	240	189	172
ENSMUSG00000085934.1	0	0	0	0	0	0	0	0	0	0	0	0	0	0	0	0	0	0	0	0	0	0	0	0	0	0	0	0	0	0	0	0	0
ENSMUSG00000094721.3	0	0	0	0	0	0	0	0	0	0	0	0	0	0	0	0	0	0	0	0	0	0	0	0	0	0	0	0	0	0	0	0	0
ENSMUSG00000112100.1	0	0	0	0	0	0	0	0	0	0	0	0	0	0	0	0	0	0	0	0	0	0	0	0	0	0	0	0	0	0	0	0	0
ENSMUSG00000107244.1	0	0	0	0	0	0	0	0	0	0	0	0	0	0	0	0	0	0	0	0	0	0	0	0	0	0	0	0	0	0	0	0	0
ENSMUSG00000047441.4	0	0	0	0	0	0	0	0	0	0	0	0	0	0	0	0	0	0	0	0	0	0	0	0	0	0	0	0	0	0	0	0	0
ENSMUSG00000100278.1	0	0	0	0	0	0	0	0	0	0	0	0	0	0	0	0	0	0	0	0	0	0	0	0	0	0	0	0	0	0	0	0	0
ENSMUSG00000062905.2	0	0	0	0	0	0	0	0	0	0	0	0	0	0	0	0	0	0	0	0	0	0	0	0	0	0	0	0	0	0	0	0	0
ENSMUSG00000052417.6	0	0	0	0	0	0	0	0	0	0	0	0	0	0	0	0	0	0	0	0	0	0	0	0	0	0	0	0	0	0	0	0	0
ENSMUSG00000099304.1	0	0	0	0	0	0	0	0	0	0	0	0	0	0	0	0	0	0	0	0	0	0	0	0	0	0	0	0	0	0	0	0	0
ENSMUSG00000094155.1	0	0	0	0	0	0	0	0	0	0	0	0	0	0	0	0	0	0	0	0	0	0	0	0	0	0	0	0	0	0	0	0	0
ENSMUSG00000089299.1	0	0	0	0	0	0	0	0	0	0	0	0	0	0	0	0	0	0	0	0	0	0	0	0	0	0	0	0	0	0	0	0	0
ENSMUSG00000110766.1	0	0	0	0	0	0	0	0	0	0	1	0	0	0	0	0	0	0	0	0	0	0	0	0	0	0	0	0	0	0	0	0	0
ENSMUSG00000080396.1	0	0	0	0	0	0	0	0	0	0	0	0	0	0	0	0	0	0	0	0	0	0	0	0	0	0	0	0	0	0	0	0	0
ENSMUSG00000024201.12	6	107	11	1	10	26	78	17	9	21	51	12	34	4	10	48	42	0	34	19	28	10	30	25	70	42	9	14	9	13	6	0	8
ENSMUSG00000067764.11	0	0	0	0	0	0	0	0	0	0	0	0	0	0	0	0	0	0	0	0	0	0	0	0	0	0	0	0	0	0	0	0	0
ENSMUSG00000029361.18	0	0	0	0	0	0	0	0	0	0	0	0	0	0	0	0	0	0	0	0	0	0	0	0	0	0	0	0	0	0	0	0	0
ENSMUSG00000105790.1	0	0	0	0	0	0	0	0	0	0	0	0	0	0	0	0	0	0	0	0	0	0	0	0	0	0	0	0	0	0	0	0	0
ENSMUSG00000027371.10	49	36	32	12	6	7	162	14	11	48	41	13	10	12	22	28	43	13	28	14	29	5	31	37	34	20	9	10	18	12	18	6	1
ENSMUSG00000003200.9	45	405	75	34	13	25	762	165	138	139	279	131	64	21	64	273	105	196	165	122	115	32	264	112	218	176	64	71	68	47	40	6	37
ENSMUSG00000081614.1	0	0	0	0	0	0	1	0	0	0	0	0	0	0	0	0	0	0	3	0	1	0	0	1	0	0	0	0	0	0	0	0	0
ENSMUSG00000099787.2	0	0	0	0	0	0	0	0	0	0	0	0	0	0	0	0	0	0	0	0	0	0	0	0	0	0	0	0	0	0	0	0	0
ENSMUSG00000050963.7	0	0	0	0	0	0	0	0	0	0	0	0	0	0	0	0	0	0	0	0	0	0	0	0	0	0	0	0	0	0	0	0	0
ENSMUSG00000016481.15	573	1641	1249	143	96	150	1529	526	313	401	409	291	235	85	172	455	515	583	685	380	469	123	492	456	985	291	283	198	181	276	244	144	193
ENSMUSG00000097850.2	0	0	0	0	0	0	0	0	0	0	6	0	0	0	0	0	0	0	0	0	0	0	0	0	0	0	0	0	0	0	0	0	0
ENSMUSG00000115349.1	0	0	0	0	0	0	0	0	0	0	0	0	0	0	0	0	0	0	0	0	0	0	0	0	0	0	0	0	0	0	0	0	0
ENSMUSG00000087362.7	0	0	0	0	0	0	0	0	0	0	1	0	0	0	0	0	0	0	0	0	0	0	0	0	0	0	0	0	0	0	0	0	0
ENSMUSG00000055546.6	80	48	0	17	27	48	5	419	34	398	139	24	63	42	69	160	51	0	22	73	501	0	190	185	320	2	16	0	3	105	12	11	42
ENSMUSG00000049583.15	0	0	0	0	0	0	0	0	0	0	0	0	0	0	0	0	0	0	0	0	0	0	0	0	0	0	0	0	0	0	0	0	0
ENSMUSG00000076758.6	0	0	0	0	0	0	5	0	0	1	5	0	0	0	0	1	3	0	0	0	0	0	0	0	0	0	0	0	0	0	0	0	3
ENSMUSG00000062604.11	124	766	618	42	41	40	517	124	82	126	229	114	47	19	50	161	220	229	401	124	174	26	229	121	394	88	80	81	71	84	38	53	48
ENSMUSG00000104625.1	0	0	0	0	0	0	0	0	0	0	0	0	0	0	0	0	0	0	0	0	0	0	0	0	0	0	0	0	0	0	0	0	0
ENSMUSG00000095467.1	0	0	0	0	0	0	0	0	0	0	0	0	0	0	0	0	0	0	0	0	0	0	0	0	0	0	0	0	0	0	0	0	0
ENSMUSG00000113895.1	0	0	0	0	0	0	0	0	0	0	0	0	0	0	0	0	0	0	0	0	0	0	0	0	0	0	0	0	0	0	0	0	0
ENSMUSG00000033533.14	956	0	0	0	9	0	0	0	0	0	0	0	0	0	0	0	0	0	0	0	0	0	0	1	16	0	0	0	0	0	0	0	0
ENSMUSG00000084743.1	0	0	0	0	0	0	0	0	0	0	0	0	0	0	0	0	0	0	0	0	0	0	0	0	0	0	0	0	0	0	0	0	0
ENSMUSG00000020653.12	30	58	71	16	22	1	130	11	17	30	19	12	0	7	6	40	11	27	33	22	60	1	44	38	60	17	14	13	2	14	13	9	15
ENSMUSG00000025158.7	4	0	0	0	11	0	11	1	5	7	17	5	4	0	1	3	0	0	5	1	0	0	1	5	7	3	4	1	0	0	0	1	0
ENSMUSG00000100305.1	0	0	0	0	0	0	0	0	0	0	0	0	0	0	0	0	0	0	0	0	0	0	0	0	0	0	0	0	0	0	0	0	0
ENSMUSG00000024922.1	0	0	0	0	0	0	0	0	0	0	0	0	0	0	0	0	0	0	0	0	0	0	2	0	0	0	0	0	0	0	0	0	0
ENSMUSG00000040502.5	25	0	2	0	0	4	53	8	2	4	6	6	0	0	2	13	7	53	0	6	5	0	9	14	6	8	9	0	14	22	3	0	0
ENSMUSG00000089326.1	0	0	0	0	0	0	0	0	0	0	0	0	0	0	0	0	0	0	0	0	0	0	0	0	0	0	0	0	0	0	0	0	0
ENSMUSG00000107754.1	0	0	0	0	0	0	0	0	0	0	0	0	0	0	0	0	0	0	0	0	0	0	0	0	0	0	0	0	0	0	0	0	0
ENSMUSG00000077384.1	0	0	0	0	0	0	0	0	0	0	0	0	0	0	0	0	0	0	0	0	0	0	0	0	0	0	0	0	0	0	0	0	0
ENSMUSG00000100788.1	0	0	0	0	0	0	0	0	0	0	0	0	0	0	0	0	0	0	0	0	0	0	0	0	0	0	0	0	0	0	0	0	0
ENSMUSG00000098596.1	0	0	0	0	0	0	0	0	0	0	0	0	0	0	0	0	0	0	0	0	0	0	0	0	0	0	0	0	0	0	0	0	0
ENSMUSG00000092848.1	0	0	0	0	0	0	0	0	0	0	0	0	0	0	0	0	0	0	0	0	0	0	0	0	0	0	0	0	0	0	0	0	0
ENSMUSG00000028287.4	0	0	0	0	0	0	0	0	0	0	0	0	0	0	0	0	0	0	0	0	0	0	0	0	0	0	0	0	0	0	0	0	0
ENSMUSG00000064843.1	0	0	0	0	0	0	0	0	0	0	0	0	0	0	0	0	0	0	0	0	0	0	0	0	0	0	0	0	0	0	0	0	0
ENSMUSG00000087872.1	0	0	0	0	0	0	0	0	0	0	0	0	0	0	0	0	0	0	0	0	0	0	0	0	0	0	0	0	0	0	0	0	0
ENSMUSG00000109182.1	0	0	0	0	0	0	0	0	0	0	0	0	0	0	0	0	0	0	0	0	0	0	0	0	0	0	0	0	0	0	0	0	0
ENSMUSG00000040875.12	0	0	0	0	0	0	0	0	0	1	0	0	0	0	0	0	0	0	0	0	0	0	2	0	0	0	0	0	0	0	0	0	0
ENSMUSG00000031543.18	116	126	50	154	257	447	51	11	11	0	17	10	34	0	0	236	198	191	202	410	403	7	7	4	110	12	17	197	107	140	446	306	290
ENSMUSG00000103434.1	0	0	0	0	0	0	0	0	0	0	0	0	0	0	0	0	0	0	0	0	0	0	0	0	0	0	0	0	0	0	0	0	0
ENSMUSG00000099814.6	0	0	0	0	0	0	0	0	0	0	0	0	0	0	0	0	0	0	0	0	0	0	0	0	0	0	0	0	0	0	0	0	0
ENSMUSG00000113922.1	0	0	0	0	0	0	0	0	0	0	0	0	0	0	0	0	0	0	0	0	0	0	0	0	0	0	0	0	0	0	0	0	0
ENSMUSG00000031111.16	0	0	0	0	0	0	0	0	0	0	0	0	0	0	0	0	0	0	0	0	0	0	0	0	0	0	0	0	0	0	0	0	0
ENSMUSG00000101980.1	0	0	0	0	0	0	0	0	0	0	0	0	0	0	0	0	0	0	0	0	0	0	0	0	0	0	0	0	0	0	0	0	0
ENSMUSG00000043631.8	0	0	0	2	0	0	0	2	0	0	0	0	0	2	0	0	0	0	0	0	8	0	0	13	1	1	3	0	0	0	0	0	0
ENSMUSG00000048728.15	0	0	0	0	0	0	2	0	0	0	0	0	0	0	0	0	0	0	0	0	0	0	0	1	0	0	0	0	0	0	0	0	0
ENSMUSG00000095977.1	0	0	0	0	0	0	0	0	0	0	0	0	0	0	0	0	0	0	0	0	0	0	0	0	0	0	0	0	0	0	0	0	0
ENSMUSG00000085006.7	0	0	0	0	0	0	0	0	0	0	0	0	0	0	0	0	0	0	0	0	0	0	0	0	0	0	0	0	0	0	0	0	0
ENSMUSG00000108017.1	0	0	0	0	0	0	0	0	0	0	0	0	0	0	0	0	0	0	0	0	0	0	0	0	0	0	0	0	0	0	0	0	0
ENSMUSG00000111539.1	0	0	0	0	0	0	0	0	0	0	0	0	0	0	0	0	0	0	0	0	0	0	0	0	0	0	0	0	0	0	0	0	4
ENSMUSG00000081169.1	3	0	0	0	0	0	1	2	3	1	6	2	0	0	0	0	0	0	0	0	0	0	2	9	2	0	0	0	0	0	0	0	0
ENSMUSG00000088135.1	0	0	0	0	0	0	0	0	0	0	0	0	0	0	0	0	0	0	0	0	0	0	0	0	0	0	0	0	0	0	0	0	0
ENSMUSG00000085489.7	0	0	0	0	0	0	0	0	0	0	0	0	0	0	0	0	0	0	0	0	0	0	0	0	0	0	0	0	0	0	0	0	0
ENSMUSG00000106563.1	0	0	0	0	0	0	0	0	0	0	0	0	0	0	0	0	0	0	0	0	0	0	0	0	0	0	0	0	0	0	0	0	0
ENSMUSG00000041248.9	0	35	44	0	0	0	2	3	0	2	3	2	0	0	0	7	29	18	55	9	3	5	1	6	6	3	1	4	2	0	19	0	2
ENSMUSG00000033152.13	0	0	0	0	0	0	0	0	0	0	28	0	0	0	0	0	0	0	0	0	0	0	0	3	4	0	0	0	0	0	0	0	0
ENSMUSG00000100815.1	0	0	0	0	0	0	0	0	0	0	0	0	0	0	0	0	0	0	0	0	0	0	0	0	0	0	0	0	0	0	0	0	0
ENSMUSG00000065589.1	0	0	0	0	0	0	0	0	0	0	0	0	0	0	0	0	0	0	0	0	0	0	0	0	0	0	0	0	0	0	0	0	0
ENSMUSG00000098623.1	0	0	0	0	0	0	0	0	0	0	0	0	0	0	0	0	0	0	0	0	0	0	0	0	0	0	0	0	0	0	0	0	0
ENSMUSG00000028557.10	10132	14925	14204	1396	2677	8829	2703	652	555	144	882	395	1011	210	183	4509	7753	14373	9472	9552	8005	214	1051	253	6814	227	336	4219	1610	4572	11695	7817	7664
ENSMUSG00000091657.1	0	0	0	0	0	0	0	0	0	0	0	0	0	0	0	0	0	0	0	0	0	0	0	0	0	0	0	0	0	0	0	0	0
ENSMUSG00000077411.1	0	0	0	0	0	0	0	0	0	0	0	0	0	0	0	0	0	0	0	0	0	0	0	0	0	0	0	0	0	0	0	0	0
ENSMUSG00000086681.1	0	0	0	0	0	0	0	0	0	0	0	0	0	0	0	0	0	0	0	0	0	0	0	0	0	0	0	0	0	0	0	0	0
ENSMUSG00000051736.8	0	18	0	0	13	0	19	0	1	5	11	0	0	1	0	1	0	0	1	5	2	0	0	7	1	0	1	0	0	0	0	5	0
ENSMUSG00000021348.3	0	0	0	0	0	0	0	0	0	0	0	0	0	0	0	0	0	0	0	0	0	0	0	0	0	0	0	0	0	0	0	0	0
ENSMUSG00000044377.3	12	0	2	0	0	0	1	1	0	1	4	0	0	0	0	1	0	1	7	0	1	0	0	0	0	0	1	0	0	0	0	0	0
ENSMUSG00000066807.2	0	0	0	0	0	0	0	0	0	0	0	0	0	0	0	0	0	0	0	0	0	0	0	0	0	0	0	0	0	0	0	0	0
ENSMUSG00000028314.6	0	0	0	0	0	0	0	0	0	0	0	0	0	0	0	0	0	0	0	0	0	0	0	0	0	0	0	0	0	0	0	0	0
ENSMUSG00000114668.1	0	0	0	0	0	0	0	0	0	0	0	0	0	0	0	0	0	0	0	0	0	0	0	0	0	0	0	0	0	0	0	0	0
ENSMUSG00000080933.4	0	0	0	0	0	0	0	0	0	0	0	0	0	0	0	0	0	0	0	0	0	0	0	0	0	0	0	0	0	0	0	0	0
ENSMUSG00000084298.1	0	0	0	0	0	0	0	0	0	0	0	0	0	0	0	0	0	0	0	0	0	0	0	0	0	0	0	0	0	0	0	0	0
ENSMUSG00000096120.1	0	0	0	0	0	0	0	0	0	0	0	0	0	0	0	0	0	0	0	0	0	0	0	0	0	0	0	0	0	0	0	0	0
ENSMUSG00000026999.14	181	170	138	4	5	51	306	71	20	31	141	42	31	2	15	78	83	132	162	69	52	8	74	77	129	54	43	19	29	48	8	28	38
ENSMUSG00000109692.1	0	0	0	0	0	0	0	0	0	0	0	0	0	0	0	0	0	0	0	0	0	0	0	0	0	0	0	0	0	0	0	0	0
ENSMUSG00000085516.1	0	0	0	0	0	0	0	0	0	0	0	0	0	0	0	0	0	0	0	0	0	0	0	0	0	0	0	0	0	0	0	0	0
ENSMUSG00000103944.1	0	0	0	0	0	0	0	0	0	0	0	0	0	0	0	0	0	0	0	0	0	0	0	0	0	0	0	0	0	0	0	0	0
ENSMUSG00000094786.1	46	0	61	1	0	0	9	2	1	5	4	0	13	0	0	3	6	0	0	0	13	0	1	15	0	1	2	6	0	8	0	26	0
ENSMUSG00000031162.14	121	206	62	46	40	203	338	69	40	35	30	85	65	55	60	163	146	214	217	179	136	3	120	10	392	37	33	100	52	62	131	189	130
ENSMUSG00000028125.14	0	0	0	0	6	0	1	0	0	2	0	0	0	1	0	1	0	0	0	0	4	0	2	1	8	0	0	0	0	0	0	0	0
ENSMUSG00000024477.3	2	92	111	9	11	38	107	33	9	27	48	27	38	9	13	41	24	19	34	48	30	9	39	36	56	25	26	0	22	45	9	10	10
ENSMUSG00000073574.3	0	0	0	0	0	0	0	0	0	0	0	0	0	0	0	0	0	0	0	0	0	0	0	0	0	0	0	0	0	0	0	0	0
ENSMUSG00000112165.1	0	0	0	0	0	0	0	0	0	0	0	0	0	0	0	0	0	0	0	0	0	0	0	0	0	0	0	0	0	0	0	0	0
ENSMUSG00000105372.1	0	0	0	0	0	0	0	0	0	0	0	0	0	0	0	0	0	0	0	0	0	0	0	0	0	0	0	0	0	0	0	0	0
ENSMUSG00000032089.16	383	1512	908	221	90	166	1993	605	298	459	272	325	236	112	223	961	822	763	885	380	416	250	964	787	922	644	353	308	273	353	244	320	319
ENSMUSG00000099369.1	0	0	0	0	0	0	0	0	0	0	0	0	0	0	0	0	0	0	0	0	0	0	0	0	0	0	0	0	0	0	0	0	0
ENSMUSG00000108527.1	0	0	0	0	0	0	0	0	0	0	0	0	0	0	0	0	0	0	0	0	0	0	0	0	0	0	0	0	0	0	0	0	0
ENSMUSG00000078157.1	0	0	0	2	0	0	0	0	0	0	0	0	0	0	0	0	0	0	2	0	0	0	0	0	0	0	0	0	0	0	0	0	0
ENSMUSG00000026567.16	0	0	0	0	0	0	0	0	0	0	0	0	0	0	0	0	0	0	0	0	0	0	0	0	0	1	0	0	0	0	0	0	0
ENSMUSG00000092283.1	0	0	0	0	0	0	2	0	0	0	0	0	0	0	0	0	0	0	0	0	0	0	0	0	0	0	0	0	0	0	0	0	0
ENSMUSG00000001870.15	678	331	429	15	17	111	512	231	178	383	139	129	128	95	94	302	248	685	662	170	291	70	388	181	895	59	83	42	50	249	83	42	60
ENSMUSG00000081679.1	4	0	0	0	0	0	0	0	0	0	0	0	0	0	0	0	0	0	0	0	0	0	0	0	0	0	0	0	0	0	0	0	0
ENSMUSG00000065616.3	0	0	0	0	0	0	0	0	0	0	0	0	0	0	0	0	0	0	0	0	0	0	0	0	0	0	0	0	0	0	0	0	0
ENSMUSG00000104207.1	0	0	0	0	0	0	0	0	0	0	0	0	0	0	0	0	0	0	0	0	0	0	0	0	0	0	0	0	0	0	0	0	0
ENSMUSG00000113477.1	0	0	0	0	0	0	0	0	0	0	0	0	0	0	0	0	0	0	0	0	0	0	0	0	0	0	0	0	0	0	0	0	0
ENSMUSG00000109839.1	0	0	0	0	0	0	0	0	0	0	0	0	0	0	0	0	0	0	0	0	0	0	0	0	0	0	0	0	0	0	0	0	0
ENSMUSG00000102753.1	0	0	0	0	0	0	0	0	0	0	0	0	0	0	0	0	0	0	0	0	0	0	0	0	0	0	0	0	0	0	0	0	0
ENSMUSG00000084325.2	0	0	0	0	0	0	0	0	0	0	0	0	0	0	0	0	0	0	0	0	0	0	0	0	0	0	0	0	0	0	0	0	0
ENSMUSG00000073601.2	0	0	0	0	0	0	0	0	0	0	0	0	0	0	0	0	0	0	0	0	0	0	0	0	0	0	0	0	0	0	0	0	0
ENSMUSG00000094813.2	0	0	0	0	0	0	0	0	0	0	0	0	0	0	0	0	0	0	0	0	0	0	0	0	0	0	0	0	0	0	0	0	0
ENSMUSG00000028176.11	0	0	0	0	0	0	0	0	0	0	0	0	0	0	0	0	0	0	0	0	0	0	0	0	0	0	0	0	0	0	0	0	0
ENSMUSG00000017286.15	127	403	337	35	13	93	944	196	147	204	242	144	40	47	56	191	282	177	252	122	151	57	235	225	394	138	109	73	55	143	123	86	74
ENSMUSG00000082871.2	0	0	0	0	0	0	0	0	0	0	0	0	0	0	0	0	0	0	0	0	0	0	0	0	0	0	0	0	0	0	0	0	0
ENSMUSG00000107336.1	0	0	0	0	0	0	0	0	0	0	0	0	0	0	0	0	0	0	0	0	0	0	0	0	0	0	0	0	0	0	0	0	0
ENSMUSG00000030739.18	10	0	0	0	0	0	0	0	0	0	0	0	0	0	0	0	0	0	0	10	2	0	0	32	0	0	2	0	0	0	0	0	0
ENSMUSG00000043872.14	69	151	222	12	35	55	183	30	19	28	138	29	13	9	18	69	111	58	139	85	68	16	43	32	168	33	40	15	16	40	43	41	14
ENSMUSG00000068745.6	0	0	0	0	0	0	0	0	0	0	2	0	0	0	0	0	0	0	0	0	0	0	0	0	0	0	0	0	0	0	0	0	0
ENSMUSG00000087454.1	0	0	0	0	0	0	0	0	0	0	0	0	0	0	0	0	0	0	0	0	0	0	0	0	0	0	0	0	0	0	0	0	0
ENSMUSG00000110858.1	0	0	0	0	0	0	0	0	0	0	0	0	0	0	0	0	0	0	0	0	0	0	0	0	0	0	0	0	0	0	0	0	0
ENSMUSG00000092310.2	0	0	0	0	0	0	0	0	0	0	0	0	0	0	0	0	0	0	0	0	0	0	0	0	0	0	0	0	0	0	0	0	0
ENSMUSG00000024987.5	0	0	0	2	3	0	0	2	0	17	0	0	0	2	0	1	0	0	0	0	8	0	0	1	1	1	1	0	0	1	7	0	0
ENSMUSG00000105882.1	0	0	0	0	0	0	0	0	0	0	0	0	0	0	0	0	0	0	0	0	0	0	0	0	0	0	0	0	0	0	0	0	0
ENSMUSG00000099879.1	0	0	0	0	0	0	0	0	0	0	0	0	0	0	0	0	0	0	0	0	0	0	0	0	0	0	0	0	0	0	0	0	0
ENSMUSG00000066242.3	0	0	0	0	0	0	0	0	0	0	0	0	0	0	0	0	0	0	0	0	0	0	0	0	0	0	0	0	0	0	0	0	0
ENSMUSG00000081706.1	0	0	0	0	0	0	0	0	0	0	0	0	0	0	0	0	0	0	0	0	0	0	0	0	1	0	0	0	0	0	0	0	0
ENSMUSG00000012126.16	11	96	9	3	0	23	94	11	25	11	37	16	6	3	6	24	23	5	53	25	16	6	51	8	38	28	5	9	5	3	3	1	9
ENSMUSG00000103016.1	0	0	0	0	0	0	0	0	0	0	0	0	0	0	0	0	0	0	0	0	0	0	0	0	0	2	0	0	0	0	0	0	1
ENSMUSG00000097942.1	0	0	0	0	0	0	0	0	0	0	0	0	0	0	0	0	0	0	0	0	0	0	0	0	0	0	0	0	0	0	0	0	0
ENSMUSG00000115321.1	0	0	0	0	0	0	0	0	0	0	0	0	0	0	0	0	0	0	0	0	0	0	0	0	0	0	0	0	0	0	0	0	0
ENSMUSG00000101562.1	0	0	0	0	0	0	0	0	0	0	0	0	0	0	0	0	0	0	0	0	0	0	0	0	0	0	0	0	0	0	0	0	0
ENSMUSG00000104717.1	0	0	0	0	0	0	0	0	0	0	0	0	0	0	0	0	0	0	0	0	0	0	0	0	0	0	0	0	0	0	0	0	0
ENSMUSG00000113987.1	0	0	0	0	0	0	0	0	0	0	0	0	0	0	0	0	0	0	0	0	0	0	0	0	0	0	0	0	0	0	0	0	0
ENSMUSG00000010136.14	0	16	5	0	0	0	4	8	0	0	8	1	0	0	1	1	6	0	11	7	8	0	11	13	9	0	0	0	0	0	0	0	0
ENSMUSG00000021458.17	27	132	244	52	37	22	1194	119	92	139	253	101	53	39	88	161	77	138	127	75	72	49	174	144	117	120	80	76	58	47	37	17	34
ENSMUSG00000103499.5	0	0	0	0	0	0	0	0	0	0	0	0	0	0	0	0	0	0	0	0	0	0	0	0	0	0	0	0	0	0	0	0	0
ENSMUSG00000084835.1	0	5	0	0	0	0	0	0	0	0	0	0	0	0	0	0	0	0	0	0	0	0	0	0	0	0	0	0	0	0	0	0	0
ENSMUSG00000111001.1	0	0	0	0	0	0	0	0	0	0	0	0	0	0	0	0	0	0	0	0	0	0	0	0	0	0	0	0	0	0	0	0	0
ENSMUSG00000106145.1	0	0	0	0	0	0	0	0	0	0	0	0	0	0	0	0	0	0	0	0	0	0	0	0	0	0	0	0	0	0	0	0	0
ENSMUSG00000093056.2	0	0	0	0	0	0	0	0	0	0	0	0	0	0	0	0	0	0	0	0	0	0	0	0	0	0	0	0	0	0	0	0	0
ENSMUSG00000104691.1	0	0	0	0	0	0	0	0	0	0	0	0	0	0	0	0	0	0	0	0	0	0	0	0	3	0	0	0	0	0	0	0	0
ENSMUSG00000004038.9	7	0	0	0	0	0	0	0	0	0	0	0	0	0	0	0	0	0	0	0	0	0	0	0	0	0	0	0	0	0	0	0	0
ENSMUSG00000080515.1	0	0	0	0	0	0	0	0	0	0	0	0	0	0	0	0	0	0	0	0	0	0	0	0	0	0	0	0	0	0	0	0	0
ENSMUSG00000077476.1	0	0	0	0	0	0	0	0	0	0	0	0	0	0	0	0	0	0	0	0	0	0	0	0	0	0	0	0	0	0	0	0	0
ENSMUSG00000089418.2	0	0	0	0	0	0	0	0	0	0	0	0	0	0	0	0	0	0	0	0	0	0	0	0	0	0	0	0	0	0	0	0	0
ENSMUSG00000098688.1	0	0	0	0	0	0	0	0	0	0	0	0	0	0	0	0	0	0	0	0	0	0	0	0	0	0	0	0	0	0	0	0	0
ENSMUSG00000053907.10	275	1745	1395	71	108	75	1063	458	231	285	628	278	180	53	123	401	516	574	800	343	376	101	427	471	706	333	254	187	207	161	148	166	109
ENSMUSG00000035086.13	5890	12428	8777	1927	2865	8048	5168	1132	663	412	1213	683	946	219	308	4120	7756	10626	8484	7287	6728	200	1483	545	6959	501	383	3458	1690	3897	9026	7778	6431
ENSMUSG00000029564.12	0	0	0	0	0	0	0	0	0	0	0	0	0	0	0	0	0	0	0	0	0	0	0	0	0	0	0	0	0	0	0	0	0
ENSMUSG00000087964.1	0	0	0	0	0	0	0	0	0	0	0	0	0	0	0	0	0	0	0	0	0	0	0	0	0	0	0	0	0	0	0	0	0
ENSMUSG00000099906.2	0	0	0	0	0	0	0	0	0	0	0	0	0	0	0	0	0	0	0	0	0	0	0	0	0	0	0	0	0	0	0	0	0
ENSMUSG00000080998.1	0	0	0	0	0	0	1	0	0	0	0	0	0	0	0	0	0	0	0	0	0	0	0	0	0	0	0	0	0	0	0	0	0
ENSMUSG00000114130.1	0	0	0	0	0	0	0	0	0	0	0	0	0	0	0	0	0	0	0	0	0	0	0	0	0	0	0	0	0	0	0	0	0
ENSMUSG00000109274.1	0	0	0	0	0	0	2	0	1	1	5	2	5	0	0	0	0	0	0	2	2	0	0	4	0	0	1	1	0	0	0	0	0
ENSMUSG00000096185.1	0	0	0	0	0	0	0	0	0	0	0	0	0	0	0	0	0	0	0	0	0	0	0	0	0	0	0	0	0	0	0	0	0
ENSMUSG00000103526.1	0	0	0	0	0	0	0	0	0	0	0	0	0	0	0	0	0	0	0	0	0	0	0	0	0	0	0	0	0	0	0	0	0
ENSMUSG00000112796.1	2	19	0	0	0	0	9	0	0	2	0	0	0	0	0	1	0	0	0	3	2	0	0	0	0	1	0	0	0	0	0	0	0
ENSMUSG00000083644.1	0	0	0	0	0	0	0	0	0	0	0	0	0	0	0	0	0	0	0	0	0	0	0	0	0	0	0	0	0	0	0	0	0
ENSMUSG00000108109.1	0	0	0	0	0	0	0	0	0	0	0	0	0	0	0	0	0	0	0	0	0	0	0	0	0	0	0	0	0	0	0	0	0
ENSMUSG00000062432.4	0	0	0	0	0	0	0	0	0	0	0	0	0	0	0	0	0	0	0	0	0	0	0	0	0	0	0	0	0	0	0	0	0
ENSMUSG00000069518.5	0	0	0	0	0	0	0	0	0	0	0	0	0	0	0	0	0	0	0	0	0	0	0	0	0	0	0	0	0	0	0	0	0
ENSMUSG00000110293.1	0	0	0	0	0	0	0	0	0	0	0	0	0	0	0	0	0	0	0	0	0	0	0	0	0	0	0	0	0	0	0	0	0
ENSMUSG00000088227.1	0	0	0	0	0	0	0	0	0	0	0	0	0	0	0	0	0	0	0	0	0	0	0	0	0	0	0	0	0	0	0	0	0
ENSMUSG00000019809.16	89	174	144	3	4	49	122	30	19	47	61	17	7	13	26	39	82	53	28	24	72	24	50	32	66	22	39	15	9	11	74	0	29
ENSMUSG00000111511.1	0	0	0	0	0	0	0	0	0	0	0	0	0	0	0	0	0	0	0	0	0	0	0	0	0	0	0	0	0	0	0	0	0
ENSMUSG00000106655.1	0	0	0	0	0	0	0	0	0	0	0	0	0	0	0	0	0	0	0	0	0	0	0	0	0	0	0	0	0	0	0	0	0
ENSMUSG00000081141.1	0	0	0	0	0	0	0	0	0	0	0	0	0	0	0	0	0	0	0	0	0	0	0	0	0	0	0	0	0	0	0	0	0
ENSMUSG00000050490.7	0	0	0	0	0	2	8	5	1	1	1	4	0	0	0	5	1	2	3	9	2	1	0	1	5	3	0	0	2	0	1	3	1
ENSMUSG00000077503.1	0	0	0	0	0	0	0	0	0	0	0	0	0	0	0	0	0	0	0	0	0	0	0	0	0	0	0	0	0	0	0	0	0
ENSMUSG00000044626.12	0	0	0	0	0	0	0	1	0	0	5	0	0	0	0	0	0	0	0	4	7	3	0	18	0	0	0	0	0	0	0	0	0
ENSMUSG00000100907.1	0	0	0	0	0	0	0	0	0	0	0	0	0	0	0	0	0	0	0	0	0	0	0	0	0	0	0	0	0	0	0	0	0
ENSMUSG00000086773.1	0	0	0	0	0	0	9	8	10	10	0	2	0	1	1	1	1	11	0	1	0	0	0	5	15	0	1	0	2	5	0	0	2
ENSMUSG00000032044.4	38	233	84	11	9	21	364	81	48	79	87	60	38	12	36	93	69	26	110	36	77	13	132	103	122	64	45	60	51	29	3	14	20
ENSMUSG00000060049.5	0	0	0	0	0	0	0	0	0	0	0	0	0	0	0	0	0	0	0	0	0	0	0	0	0	0	0	0	0	0	0	0	0
ENSMUSG00000065561.2	0	0	0	0	0	0	0	0	0	0	0	0	0	0	0	0	0	0	0	0	0	0	0	0	0	0	0	0	0	0	0	0	0
ENSMUSG00000004233.14	46	176	85	5	65	5	138	30	31	22	65	33	24	4	13	53	56	29	76	32	42	17	48	54	56	31	18	12	33	27	21	10	16
ENSMUSG00000109301.1	0	0	0	0	0	0	0	0	0	0	0	0	0	0	0	0	0	0	0	0	0	0	0	0	0	0	0	0	0	0	0	0	0
ENSMUSG00000098715.6	27	7	64	8	0	0	35	4	0	8	10	1	0	5	9	11	1	0	12	12	2	0	4	4	1	5	0	0	0	20	10	0	3
ENSMUSG00000091749.7	0	0	0	0	0	0	0	0	0	0	0	0	0	0	0	0	0	0	0	0	0	0	0	0	0	0	0	0	0	0	0	0	0
ENSMUSG00000096212.1	0	0	0	0	0	0	0	0	0	0	0	0	0	0	0	0	0	0	0	0	0	0	0	0	0	0	0	0	0	0	0	0	0
ENSMUSG00000044469.7	3	0	10	2	0	0	38	7	3	7	31	1	2	2	2	6	7	10	0	1	11	0	5	2	10	9	4	3	0	0	0	3	3
ENSMUSG00000112823.1	0	0	0	0	0	0	1	0	0	0	1	0	0	0	0	1	0	0	0	3	0	0	1	1	1	1	0	0	0	0	0	0	0
ENSMUSG00000054957.5	0	0	0	0	0	0	0	0	0	0	0	0	0	0	0	0	0	0	0	0	0	0	0	0	0	0	0	0	0	0	0	0	0
ENSMUSG00000109784.1	0	0	0	0	0	0	0	0	0	0	2	0	0	0	0	0	0	0	0	0	0	0	0	0	0	0	0	0	0	0	0	0	0
ENSMUSG00000084270.1	0	0	0	0	0	0	0	0	0	0	0	0	0	0	0	0	0	0	0	0	0	0	0	0	0	0	0	0	0	0	0	0	0
ENSMUSG00000102335.5	0	0	0	0	0	0	0	0	0	0	0	0	0	0	0	0	0	0	0	0	0	0	0	0	0	0	0	0	0	0	0	0	0
ENSMUSG00000085608.1	0	0	0	0	0	0	0	0	0	0	0	0	0	0	0	0	0	0	0	0	0	0	0	0	0	0	0	0	0	0	0	0	0
ENSMUSG00000100881.1	0	0	0	0	0	0	0	0	0	0	0	0	0	0	0	0	0	0	0	0	0	0	0	0	0	0	0	0	0	0	0	0	0
ENSMUSG00000094878.2	0	0	0	0	0	0	0	0	0	0	0	0	0	0	0	0	0	0	0	0	0	0	0	0	0	0	0	0	0	0	0	0	0
ENSMUSG00000110320.1	0	0	0	0	0	0	0	0	0	0	0	0	0	0	0	0	0	0	0	0	0	0	0	0	0	0	0	0	0	0	0	0	0
ENSMUSG00000105464.1	0	0	0	0	0	0	0	0	0	0	0	0	0	0	0	0	0	0	0	0	0	0	0	0	0	0	0	0	0	0	0	0	0
ENSMUSG00000099341.1	0	0	0	0	0	0	0	0	0	0	0	0	0	0	0	0	0	0	0	0	0	0	0	0	0	0	0	0	0	0	0	0	0
ENSMUSG00000076312.1	0	0	0	0	0	0	0	0	0	0	0	0	0	0	0	0	0	0	0	0	0	0	0	0	0	0	0	0	0	0	0	0	0
ENSMUSG00000092375.1	0	0	0	0	0	0	0	0	0	0	1	0	0	0	0	0	0	0	0	0	0	0	0	0	0	0	0	0	0	0	0	0	0
ENSMUSG00000064370.1	34513	10503	15910	391	851	1396	4932	2586	1453	859	7687	1406	1293	269	672	1209	7070	5332	7373	3216	3576	128	2794	3463	12262	286	396	1266	1208	1883	2389	1987	1297
ENSMUSG00000065708.1	0	0	0	0	0	0	0	0	0	0	0	0	0	0	0	0	0	0	0	0	0	0	0	0	0	0	0	0	0	0	0	0	0
ENSMUSG00000088737.1	0	0	0	0	0	0	0	0	0	0	0	0	0	0	0	0	0	0	0	0	0	0	0	0	0	0	0	0	0	0	0	0	0
ENSMUSG00000078249.5	0	0	0	0	0	0	0	0	0	0	0	0	0	0	0	0	0	0	0	0	0	0	0	0	1	0	0	0	0	0	0	0	0
ENSMUSG00000086800.1	0	0	0	0	0	0	0	0	0	0	0	0	0	0	0	0	0	0	0	0	0	0	0	0	0	0	0	0	0	0	0	0	0
ENSMUSG00000113569.1	0	0	0	0	0	0	0	0	0	0	0	0	0	0	0	0	0	0	0	0	0	0	0	0	0	0	0	0	0	0	0	0	0
ENSMUSG00000095021.1	0	0	0	0	0	0	0	0	0	0	0	0	0	0	0	0	0	0	0	0	0	0	0	0	0	0	0	0	0	0	0	0	0
ENSMUSG00000108593.1	0	0	0	0	0	0	2	0	0	0	0	0	0	0	0	0	0	0	0	0	0	0	0	0	0	0	0	0	0	0	0	0	0
ENSMUSG00000084417.1	0	0	0	0	0	0	0	0	0	0	0	0	0	0	0	0	0	0	0	0	0	0	0	0	0	0	0	0	0	0	0	0	0
ENSMUSG00000076795.6	0	0	0	0	0	0	11	0	1	1	1	0	0	9	1	3	0	0	0	3	0	0	2	0	0	1	0	0	0	0	0	0	1
ENSMUSG00000019428.16	462	1007	414	420	587	806	2964	518	531	499	723	412	302	136	291	1643	505	993	730	1052	1213	198	1237	349	1377	512	162	573	558	368	689	593	731
ENSMUSG00000109811.1	0	0	0	0	0	0	0	0	0	0	0	0	0	0	0	0	0	0	0	0	0	0	0	0	0	0	0	0	0	0	0	0	0
ENSMUSG00000058349.2	0	0	0	0	0	0	0	0	0	0	0	0	0	0	0	0	0	0	0	0	0	0	0	0	0	0	0	0	0	0	0	0	0
ENSMUSG00000005621.11	101	447	390	30	17	32	396	72	101	70	208	67	52	18	25	139	143	281	152	106	72	15	138	156	185	104	73	65	53	83	46	23	35
ENSMUSG00000018501.17	393	1197	840	114	143	298	1056	314	253	213	665	258	155	62	103	422	583	548	566	463	395	76	415	275	770	237	172	129	211	259	251	295	277
ENSMUSG00000102845.1	0	0	0	0	0	0	0	0	0	0	0	0	0	0	0	0	0	0	0	0	0	0	0	0	0	0	0	0	0	0	0	0	0
ENSMUSG00000094905.1	0	0	0	0	0	0	0	0	0	0	0	0	0	0	0	0	0	0	0	0	0	0	0	0	0	0	0	0	0	0	0	0	0
ENSMUSG00000111066.1	0	0	0	0	0	0	0	0	0	0	0	0	0	0	0	0	0	0	0	0	0	0	0	0	0	0	0	0	0	0	0	0	0
ENSMUSG00000082963.1	0	0	0	0	0	0	0	0	0	0	0	0	0	0	0	0	0	0	0	0	0	0	0	0	0	0	0	0	0	0	0	0	0
ENSMUSG00000040659.3	35	123	53	58	80	69	765	124	116	170	78	97	52	42	81	188	78	182	78	75	82	20	242	109	103	191	63	104	76	59	84	39	55
ENSMUSG00000106090.1	0	0	0	0	0	0	0	0	0	0	0	0	0	0	0	0	0	0	0	0	0	0	0	0	0	0	0	0	0	0	0	0	0
ENSMUSG00000107428.1	0	0	0	3	0	0	0	0	0	0	0	0	0	0	0	0	0	0	0	0	0	0	3	0	0	0	0	0	0	0	0	0	0
ENSMUSG00000077058.1	0	0	0	0	0	0	0	0	0	0	0	0	0	0	0	0	0	0	0	0	0	0	0	0	0	0	0	0	0	0	0	0	0
ENSMUSG00000027833.16	0	0	0	0	0	0	0	0	0	0	0	0	0	0	0	0	0	0	0	0	0	0	0	0	7	0	0	0	0	0	0	0	0
ENSMUSG00000056895.4	3	4	0	4	28	22	15	4	1	1	19	2	6	0	0	9	9	32	18	14	8	0	2	0	3	1	0	1	2	6	30	11	15
ENSMUSG00000035200.7	0	0	0	0	0	0	1	0	0	0	0	0	0	0	0	0	0	0	0	0	0	0	0	0	0	0	0	0	0	0	0	0	0
ENSMUSG00000091184.1	0	0	0	4	3	13	0	0	0	0	5	0	0	0	0	8	0	0	16	11	5	0	0	0	0	0	0	2	0	3	22	0	12
ENSMUSG00000098150.2	0	0	0	0	0	0	0	0	0	0	0	0	0	0	0	0	0	0	0	0	0	0	0	0	0	0	0	0	0	0	0	0	0
ENSMUSG00000025195.9	11	49	35	3	3	0	24	4	4	8	15	5	1	1	2	16	15	66	26	11	7	3	24	11	36	16	1	0	14	2	7	0	0
ENSMUSG00000092402.1	0	0	4	0	0	0	0	0	0	0	0	0	0	0	0	0	0	0	0	0	0	0	0	0	0	0	0	0	0	0	0	0	0
ENSMUSG00000105974.1	0	0	0	0	0	0	0	0	0	0	0	0	0	0	0	0	0	0	0	0	0	0	0	0	0	0	0	0	0	0	0	0	0
ENSMUSG00000031365.13	57	149	199	4	12	0	139	58	21	33	106	28	8	15	17	59	108	56	142	57	40	16	53	52	90	40	31	42	29	36	18	33	22
ENSMUSG00000114195.1	0	0	0	0	0	0	0	0	0	0	0	0	0	0	0	0	0	0	0	0	0	0	0	0	0	0	0	0	0	0	0	0	0
ENSMUSG00000040697.10	11	169	21	5	16	27	54	9	5	22	28	6	3	6	10	40	28	7	21	11	19	15	25	18	37	19	21	9	10	8	13	16	3
ENSMUSG00000064880.1	0	0	0	0	0	0	0	0	0	0	0	0	0	0	0	0	0	0	0	0	0	0	0	0	0	0	0	0	0	0	0	0	0
ENSMUSG00000076822.2	0	6	0	0	0	0	32	7	3	2	4	1	0	0	2	9	3	0	0	0	4	0	0	2	13	7	2	0	6	0	0	0	0
ENSMUSG00000103108.2	0	0	0	0	0	0	0	0	0	0	0	0	0	0	0	0	0	0	0	0	0	0	0	0	0	0	0	0	0	0	0	0	0
ENSMUSG00000085043.1	0	0	0	0	0	0	0	0	0	0	2	0	0	0	0	0	0	0	3	1	0	0	0	0	0	0	0	0	0	0	0	0	0
ENSMUSG00000039218.16	96	428	150	11	2	21	379	89	69	51	197	47	47	18	28	81	116	74	142	62	89	9	99	96	120	61	48	25	58	20	35	35	31
ENSMUSG00000101654.1	0	0	0	0	0	0	0	0	0	0	0	0	0	0	0	0	0	0	0	0	0	0	0	0	0	0	0	0	0	0	0	0	0
ENSMUSG00000108620.1	0	0	0	0	0	0	0	0	0	0	0	0	0	0	0	0	0	0	0	0	0	0	0	0	0	0	0	0	0	0	0	0	0
ENSMUSG00000090019.5	185	826	617	71	66	133	1463	263	237	207	351	196	93	59	111	371	353	276	411	255	188	46	304	205	377	253	134	153	109	114	46	82	85
ENSMUSG00000095531.1	0	0	0	0	0	0	0	0	0	0	0	0	0	0	0	0	0	0	0	0	0	0	0	0	0	0	0	0	0	0	0	0	0
ENSMUSG00000036733.16	0	0	0	1	0	0	3	0	0	0	1	3	0	0	0	1	0	0	0	0	2	0	2	0	2	0	0	0	0	0	0	0	1
ENSMUSG00000003429.11	4646	9570	11798	1121	1427	2425	20142	6140	4316	3983	4541	2492	1842	737	1782	5785	4072	5698	5063	4459	3801	779	5455	5260	9663	3249	2664	2008	2205	2274	1864	1725	1775
ENSMUSG00000062497.3	0	0	0	0	0	0	0	0	0	0	0	0	0	0	0	0	0	0	0	0	0	0	0	0	0	0	0	0	0	0	0	0	0
ENSMUSG00000074439.4	0	0	0	0	0	0	0	0	0	0	0	0	0	0	0	0	0	0	0	0	0	0	0	0	0	0	0	0	0	0	0	0	0
ENSMUSG00000084927.1	0	0	0	0	0	0	0	0	0	0	0	0	0	0	0	0	0	0	0	0	0	0	0	0	0	0	0	0	0	0	0	0	0
ENSMUSG00000106237.1	0	0	0	0	0	0	0	0	0	0	0	0	0	0	0	0	0	0	0	0	0	0	0	1	0	2	0	0	2	0	0	2	0
ENSMUSG00000005672.12	0	0	2	0	0	0	9	0	5	3	4	1	0	0	1	0	18	0	0	0	9	0	0	11	0	2	0	4	2	4	0	0	0
ENSMUSG00000093148.1	0	0	0	0	0	0	0	0	0	0	0	0	0	0	0	0	0	0	0	0	0	0	0	0	0	0	0	0	0	0	0	0	0
ENSMUSG00000011463.5	0	0	0	0	0	0	0	0	0	0	0	0	0	0	0	0	0	0	0	0	0	0	0	1	0	0	0	0	0	0	0	0	0
ENSMUSG00000006599.13	280	624	747	36	14	108	794	166	122	158	364	130	93	31	79	193	241	259	342	150	175	63	216	203	501	117	107	61	86	66	80	48	50
ENSMUSG00000065143.1	0	0	0	0	0	0	0	0	0	0	0	0	0	0	0	0	0	0	0	0	0	0	0	0	0	0	0	0	0	0	0	0	0
ENSMUSG00000088172.1	0	0	0	0	0	0	0	0	0	0	0	0	0	0	0	0	0	0	0	0	0	0	0	0	0	0	0	0	0	0	0	0	0
ENSMUSG00000104783.1	0	0	0	0	0	0	0	0	0	0	0	0	0	0	0	0	0	0	0	0	0	0	0	0	0	0	0	0	0	0	0	0	0
ENSMUSG00000080607.1	0	0	0	0	0	0	0	0	0	0	0	0	0	0	0	0	0	0	0	0	0	0	0	0	0	0	0	0	0	0	0	0	0
ENSMUSG00000060560.8	0	0	0	0	0	0	0	0	0	0	0	0	0	0	0	0	0	0	0	0	0	0	0	0	0	0	0	0	0	0	0	0	0
ENSMUSG00000098660.1	0	0	0	0	0	0	0	0	0	0	0	0	0	0	0	0	0	0	0	0	0	0	0	0	0	0	0	0	0	0	0	0	0
ENSMUSG00000027452.11	178	1161	1147	78	59	75	592	190	67	156	365	65	87	56	79	384	430	165	437	303	286	77	372	349	501	217	134	103	78	163	199	158	144
ENSMUSG00000114222.1	0	0	0	0	0	0	0	0	0	0	0	0	0	0	0	0	0	0	0	0	0	0	0	0	0	0	0	0	0	0	0	0	0
ENSMUSG00000109366.1	0	9	9	0	0	4	43	7	8	1	1	5	6	6	2	3	18	41	19	1	0	0	24	1	10	1	2	3	0	1	0	0	0
ENSMUSG00000025894.11	134	307	261	20	21	42	175	50	25	53	91	24	20	9	16	66	112	80	73	110	82	17	62	45	126	17	19	52	47	74	88	91	35
ENSMUSG00000102280.1	0	0	0	0	0	0	5	1	0	3	0	0	0	0	0	0	0	0	0	0	0	0	0	0	0	1	0	0	0	0	0	0	0
ENSMUSG00000028351.5	0	0	0	0	0	0	0	0	0	0	0	0	0	0	0	0	0	0	0	0	0	0	0	2	0	0	0	0	0	0	0	0	0
ENSMUSG00000103618.1	0	0	0	0	0	0	0	0	0	0	0	0	0	0	0	0	0	0	0	0	0	0	0	0	0	0	0	0	0	0	0	0	0
ENSMUSG00000112888.1	0	0	0	0	0	0	0	0	0	0	0	0	0	0	0	0	0	0	0	0	0	0	0	0	0	0	0	0	0	0	0	0	0
ENSMUSG00000096277.2	0	0	0	0	0	0	0	0	0	0	0	0	0	0	0	0	0	0	0	0	0	0	0	0	0	0	0	0	0	0	0	0	0
ENSMUSG00000091694.8	5607	12373	7475	34275	51677	131176	12405	1101	896	57	1852	325	1953	38	91	70228	12677	36297	11548	152524	142806	432	545	98	5206	1090	1173	55866	31185	61673	167279	118865	124316
ENSMUSG00000083736.1	0	0	0	0	0	26	0	3	0	0	0	0	0	0	0	0	0	0	0	0	0	0	0	1	1	0	0	0	0	0	0	0	0
ENSMUSG00000062524.4	255	461	587	0	0	15	711	773	284	118	102	321	112	26	77	116	332	333	391	92	117	41	368	577	336	154	58	67	84	32	12	51	25
ENSMUSG00000110385.1	0	0	0	0	0	0	0	0	0	0	0	0	0	0	0	0	0	0	0	0	0	0	0	0	0	0	0	0	0	0	0	0	0
ENSMUSG00000034109.15	32	106	203	13	3	13	107	17	4	30	46	18	10	5	6	27	70	66	108	21	25	11	12	44	85	21	31	15	2	30	24	20	18
ENSMUSG00000023915.4	91	158	115	24	13	19	115	63	18	59	49	28	21	10	11	61	104	76	106	36	58	22	282	136	216	39	39	55	21	17	74	51	65
ENSMUSG00000106747.1	0	0	0	0	0	0	2	0	0	0	0	0	0	0	0	0	0	0	0	0	0	0	0	0	0	0	0	0	0	0	0	0	0
ENSMUSG00000081233.1	0	5	0	0	0	0	1	0	0	1	0	0	0	0	0	0	0	0	0	0	0	0	3	0	0	0	0	0	0	0	0	0	0
ENSMUSG00000076377.1	0	0	0	0	0	0	0	0	0	0	0	0	0	0	0	0	0	0	0	0	0	0	0	0	0	0	0	0	0	0	0	0	0
ENSMUSG00000026389.16	16	0	0	0	4	0	10	3	1	1	4	1	4	0	1	7	0	0	0	0	6	0	5	7	3	0	2	0	0	0	0	0	0
ENSMUSG00000104810.1	0	0	0	0	0	0	0	0	0	0	0	0	0	0	0	0	0	0	0	0	0	0	0	0	0	0	0	0	0	0	0	0	0
ENSMUSG00000037279.13	0	0	0	0	0	0	1	2	0	0	0	0	0	0	0	2	0	0	0	0	0	0	0	1	0	0	0	0	0	0	0	0	0
ENSMUSG00000059901.12	49	16	58	3	0	0	199	113	55	42	19	65	24	11	17	57	16	124	43	24	14	17	91	92	55	79	20	39	23	9	19	1	9
ENSMUSG00000045684.10	0	0	0	0	0	0	0	0	0	0	0	0	0	0	0	0	0	0	0	0	0	0	0	0	0	0	0	0	0	0	0	0	0
ENSMUSG00000065653.1	0	0	0	0	0	0	0	0	0	0	0	0	0	0	0	0	0	0	0	0	0	0	0	0	0	0	0	0	0	0	0	0	0
ENSMUSG00000036352.16	1181	2388	1599	544	1739	2009	762	192	135	84	242	76	141	22	36	1056	1159	2155	1040	2254	1752	39	138	122	316	119	66	1211	732	1172	2328	2718	1729
ENSMUSG00000098807.2	0	0	0	0	0	0	0	0	0	0	0	0	0	0	0	0	0	0	0	0	0	0	0	0	0	0	0	0	0	0	0	0	0
ENSMUSG00000113031.1	0	0	0	0	0	0	0	0	0	0	0	0	0	0	0	0	0	0	0	0	0	0	0	0	0	0	0	0	0	0	0	0	0
ENSMUSG00000047242.14	45	189	78	29	12	32	222	43	32	59	62	39	14	8	31	66	79	136	46	50	52	24	42	55	142	30	20	5	36	29	16	18	8
ENSMUSG00000102427.1	0	0	0	0	0	0	0	0	0	0	0	0	0	0	0	0	0	0	0	0	0	0	0	0	0	0	0	0	0	0	0	0	0
ENSMUSG00000091721.4	39	0	0	0	0	0	0	0	0	0	0	0	0	0	0	0	0	0	0	0	0	0	0	0	0	0	0	0	0	0	0	0	0
ENSMUSG00000095086.1	0	0	0	0	0	0	0	0	0	0	0	0	0	0	0	0	0	0	0	0	0	0	0	0	0	0	0	0	0	0	0	0	0
ENSMUSG00000030682.4	114	342	319	30	67	37	1191	194	125	167	140	124	105	35	91	333	121	143	277	143	201	76	344	192	322	201	114	84	77	88	75	41	68
ENSMUSG00000096304.1	0	0	0	0	0	0	0	0	0	0	0	0	0	0	0	0	0	0	0	0	0	0	0	0	0	0	0	0	0	0	0	0	0
ENSMUSG00000028840.10	33	71	38	3	4	10	158	34	50	60	19	18	6	9	18	38	18	19	23	26	15	8	37	23	34	40	12	2	17	9	4	6	3
ENSMUSG00000112915.1	0	0	0	0	0	0	0	0	0	0	0	0	0	0	0	0	0	0	0	0	0	0	0	0	0	0	0	0	0	0	0	0	0
ENSMUSG00000084362.1	0	0	0	0	0	0	0	0	0	0	0	0	0	0	0	0	0	0	0	0	0	0	0	0	0	0	0	0	0	0	0	0	0
ENSMUSG00000109876.1	0	0	0	0	0	0	0	0	0	0	0	0	0	0	0	2	2	0	0	0	0	0	1	0	0	0	1	0	0	0	0	0	0
ENSMUSG00000045252.11	0	3	5	2	9	2	35	5	2	2	19	8	0	1	3	7	11	44	4	7	3	2	9	6	11	7	1	6	1	2	12	3	0
ENSMUSG00000100973.1	0	0	0	0	0	0	0	0	0	0	0	0	0	0	0	0	0	0	0	0	0	0	0	0	0	0	0	0	0	0	0	0	0
ENSMUSG00000047207.3	0	0	0	0	0	0	0	0	0	0	0	0	0	0	0	0	0	0	0	0	0	0	0	0	0	0	0	0	0	0	0	0	0
ENSMUSG00000017950.16	486	0	0	0	46	0	0	0	0	1	0	0	0	0	0	0	0	0	0	2	0	0	0	1	50	0	0	0	0	0	0	0	0
ENSMUSG00000094850.1	0	0	0	0	0	0	0	0	0	0	0	0	0	0	0	0	0	0	0	0	0	0	0	0	0	0	0	0	0	0	0	0	0
ENSMUSG00000089994.1	0	0	0	0	0	0	0	0	0	0	0	0	0	0	0	0	0	0	0	0	0	0	0	0	0	0	0	0	0	0	0	0	0
ENSMUSG00000035929.11	549	1549	1816	345	188	359	4552	1481	1197	1251	945	1280	602	261	577	1551	1116	1026	1160	739	762	265	1635	1043	1697	1208	772	585	486	431	346	200	278
ENSMUSG00000040121.5	0	0	0	0	0	0	0	0	0	0	0	1	0	0	0	0	4	0	0	0	0	0	0	1	0	0	0	0	0	0	0	0	0
ENSMUSG00000029767.16	426	1285	739	129	83	92	1396	519	268	388	565	209	150	90	197	448	358	616	578	328	463	192	485	695	823	289	297	196	138	226	162	112	156
ENSMUSG00000027071.14	0	0	0	0	0	0	1	0	0	0	0	0	0	0	0	3	0	0	0	3	1	0	0	0	0	0	0	0	0	0	0	0	0
ENSMUSG00000110412.1	0	0	0	0	0	0	0	0	0	0	0	0	0	0	0	0	0	0	0	0	0	0	0	0	0	0	0	0	0	0	0	0	0
ENSMUSG00000105556.1	0	0	1	0	0	0	2	0	0	0	1	1	0	1	0	0	0	0	0	0	0	0	2	0	0	1	2	0	0	1	0	0	0
ENSMUSG00000000131.15	44	141	14	6	16	4	130	33	19	35	33	25	9	6	4	30	40	11	26	30	19	11	24	38	35	27	23	13	6	7	15	0	13
ENSMUSG00000099433.1	0	0	0	0	0	0	0	0	0	0	0	0	0	0	0	0	0	0	0	0	0	0	0	0	0	0	0	0	0	0	0	0	0
ENSMUSG00000092467.1	0	0	0	0	0	0	0	0	0	0	0	0	0	0	0	0	0	0	0	0	0	0	0	0	0	0	0	0	0	0	0	0	0
ENSMUSG00000088829.1	0	0	0	0	0	0	0	0	0	0	0	0	0	0	0	0	0	0	0	0	0	0	0	0	0	0	0	0	0	0	0	0	0
ENSMUSG00000076887.1	0	0	0	0	0	0	0	0	0	0	1	0	0	0	0	0	0	0	0	0	0	0	0	0	0	0	0	0	0	0	0	0	0
ENSMUSG00000103053.1	0	0	0	0	0	0	0	0	0	0	0	0	0	0	0	0	0	0	0	0	0	0	0	0	0	0	0	0	0	0	0	0	0
ENSMUSG00000095113.1	0	0	0	0	0	0	0	0	0	0	0	0	0	0	0	0	0	0	0	0	0	0	0	0	0	0	0	0	0	0	0	0	0
ENSMUSG00000025081.13	0	0	0	0	0	0	0	0	0	0	0	0	0	0	0	0	0	0	0	0	0	0	0	0	0	0	0	0	0	0	0	0	0
ENSMUSG00000017316.13	0	0	0	0	0	0	0	0	0	1	0	0	0	0	0	0	0	0	0	0	0	0	0	2	0	0	0	0	0	0	0	0	0
ENSMUSG00000113541.1	0	0	0	0	0	0	0	0	0	0	0	0	0	0	0	0	0	0	0	0	0	0	0	0	0	0	0	0	0	0	0	0	0
ENSMUSG00000087491.7	0	0	0	0	0	0	0	0	0	0	0	0	0	0	0	0	0	0	0	0	0	0	0	0	0	0	0	0	0	0	0	0	0
ENSMUSG00000108685.1	0	0	0	0	0	0	0	0	0	0	0	0	0	0	0	0	0	0	0	0	0	0	0	0	0	0	0	0	0	0	0	0	0
ENSMUSG00000083171.1	0	0	0	0	0	0	0	0	0	0	0	0	0	0	0	0	0	0	0	0	0	0	0	0	0	0	0	0	0	0	0	0	0
ENSMUSG00000102937.1	0	0	0	0	0	0	0	0	0	0	0	0	0	0	0	0	0	0	0	0	0	0	0	0	0	0	0	0	0	0	0	0	0
ENSMUSG00000109903.1	0	0	0	0	0	0	0	0	0	0	0	0	0	0	0	0	0	0	0	0	0	0	0	0	3	0	0	0	0	0	0	0	0
ENSMUSG00000095596.1	0	0	0	0	0	0	0	0	0	0	0	0	0	0	0	0	0	0	0	0	0	0	0	0	0	0	0	0	0	0	0	0	0
ENSMUSG00000071204.10	72	0	0	0	0	0	0	0	0	0	0	0	0	0	0	0	0	0	0	0	0	0	0	0	6	0	0	0	0	0	0	0	0
ENSMUSG00000060314.13	0	0	0	0	0	0	8	0	0	0	0	0	0	1	0	0	0	0	0	0	0	0	5	0	0	0	0	0	0	0	0	0	0
ENSMUSG00000111158.1	0	0	0	0	0	0	0	0	0	0	0	0	0	0	0	0	0	0	0	0	0	0	0	0	0	0	0	0	0	0	0	0	0
ENSMUSG00000023350.4	0	0	0	0	0	0	0	0	0	0	0	0	0	0	0	0	0	0	0	0	0	0	0	0	0	0	0	0	0	0	0	0	0
ENSMUSG00000106182.1	0	0	0	0	0	0	0	0	0	0	0	0	0	0	0	0	0	0	0	0	0	0	0	0	0	0	0	0	0	0	0	0	0
ENSMUSG00000082006.1	0	0	0	0	0	0	0	0	0	0	0	0	0	0	0	0	0	0	0	0	0	0	0	0	0	0	0	0	0	0	0	0	0
ENSMUSG00000061843.4	0	0	0	0	0	0	0	0	0	0	0	0	0	0	0	0	0	0	0	0	0	0	0	0	0	0	0	0	0	0	0	0	0
ENSMUSG00000098242.1	0	0	0	0	0	0	0	0	0	0	0	0	0	0	0	0	0	0	0	0	0	0	0	0	0	0	0	0	0	0	0	0	0
ENSMUSG00000041912.12	4	2	0	0	0	0	6	2	3	10	74	3	0	1	1	7	0	0	6	2	13	3	3	5	0	1	5	0	0	0	0	0	0
ENSMUSG00000087638.1	0	0	0	0	0	3	0	0	0	0	0	0	0	0	0	0	0	0	0	0	0	0	0	0	0	0	0	0	0	0	0	0	0
ENSMUSG00000042179.5	0	0	0	0	0	0	0	0	0	1	0	0	0	0	0	0	0	0	0	0	0	0	0	0	0	0	0	0	0	0	0	0	0
ENSMUSG00000056987.8	0	0	1	0	0	0	0	0	1	0	0	0	0	0	0	0	0	0	0	0	0	0	0	0	2	0	1	0	0	0	0	0	0
ENSMUSG00000076914.1	0	0	0	0	0	0	0	0	0	0	2	0	0	0	0	0	0	0	0	0	0	0	0	0	0	0	0	0	0	0	0	0	0
ENSMUSG00000114287.1	0	0	0	0	0	0	0	0	0	0	0	0	0	0	0	0	0	0	0	0	0	0	0	0	0	0	0	0	0	0	0	0	0
ENSMUSG00000028982.9	0	88	74	1	10	0	212	17	22	18	6	23	0	2	18	20	22	58	20	13	7	2	27	21	24	19	21	5	5	4	24	6	2
ENSMUSG00000064972.1	0	0	0	0	0	0	0	0	0	0	0	0	0	0	0	0	0	0	0	0	0	0	0	0	0	0	0	0	0	0	0	0	0
ENSMUSG00000112350.1	0	0	0	0	0	0	0	1	0	0	0	0	0	0	0	1	0	0	0	0	0	0	0	0	0	0	0	0	0	0	0	0	0
ENSMUSG00000029386.15	0	0	0	0	10	0	16	4	4	1	6	1	0	0	1	5	0	0	3	2	0	0	2	7	0	2	0	0	0	5	0	0	1
ENSMUSG00000108712.1	0	0	0	0	0	0	0	0	0	0	0	0	0	0	0	0	0	0	0	0	0	0	0	0	0	0	0	0	0	0	0	0	0
ENSMUSG00000101746.1	0	0	0	0	0	0	0	0	0	0	0	0	0	0	0	0	0	0	0	0	0	0	0	0	0	0	0	0	0	0	0	0	0
ENSMUSG00000083681.1	0	0	0	0	0	0	0	0	0	0	0	0	0	0	0	0	0	0	0	0	0	0	0	0	0	0	0	0	0	0	0	0	0
ENSMUSG00000022668.10	66	42	108	25	24	43	140	61	23	67	85	24	15	8	12	50	52	36	68	30	67	7	91	72	118	23	13	4	29	40	17	21	21
ENSMUSG00000037791.15	12	90	222	11	3	8	135	44	24	39	107	34	22	6	24	37	33	34	71	29	36	8	53	46	95	40	19	17	4	14	23	10	27
ENSMUSG00000034584.3	12	0	0	0	0	0	2	0	0	0	1	0	0	0	0	0	0	0	0	0	0	0	0	1	0	0	0	0	0	0	0	0	0
ENSMUSG00000085135.7	0	0	0	0	0	0	9	1	7	1	3	0	4	0	0	1	0	0	3	0	0	0	1	4	0	0	1	0	0	0	0	0	0
ENSMUSG00000106329.1	0	0	0	0	0	0	0	0	0	0	0	0	0	0	0	0	0	0	0	0	0	0	0	0	0	0	0	0	0	0	0	0	0
ENSMUSG00000061702.10	1	23	0	0	0	0	1	1	0	0	3	0	0	1	3	5	0	0	6	0	0	0	1	0	5	0	1	0	0	0	0	0	0
ENSMUSG00000065235.1	0	0	0	0	0	0	0	0	0	0	0	0	0	0	0	0	0	0	0	0	0	0	0	0	0	0	0	0	0	0	0	0	0
ENSMUSG00000081298.1	0	0	0	0	0	0	0	0	0	0	0	0	0	0	0	0	0	0	0	0	0	0	0	0	0	0	0	0	0	0	0	0	0
ENSMUSG00000088264.1	0	0	0	0	0	0	0	0	0	0	0	0	0	0	0	0	0	0	0	0	0	0	0	0	0	0	0	0	0	0	0	0	0
ENSMUSG00000104875.1	0	0	0	0	0	0	0	0	0	0	0	0	0	0	0	0	0	0	0	0	0	0	0	0	0	0	0	0	0	0	0	0	0
ENSMUSG00000050812.18	247	650	655	53	51	60	879	376	286	262	314	218	224	35	91	285	287	276	508	223	256	73	356	335	484	210	152	96	110	184	229	110	114
ENSMUSG00000098752.1	0	0	0	0	0	0	0	0	0	0	0	0	0	0	0	0	0	0	0	0	0	0	0	0	0	0	0	0	0	0	0	0	0
ENSMUSG00000091786.1	0	0	3	0	0	0	0	0	0	0	0	0	0	0	0	0	1	0	0	0	0	0	0	0	0	0	0	0	0	0	0	0	0
ENSMUSG00000113096.1	0	0	0	0	0	0	0	0	0	0	0	0	0	0	0	0	0	0	0	0	0	0	0	0	0	0	0	0	0	0	0	0	0
ENSMUSG00000114314.1	0	0	0	0	0	0	0	0	0	0	0	0	0	0	0	0	0	0	0	0	0	0	0	0	0	0	0	0	0	0	0	0	0
ENSMUSG00000109458.1	0	0	0	0	0	0	0	0	0	0	0	0	0	0	0	0	0	0	0	0	0	0	0	0	0	0	0	0	0	0	0	0	0
ENSMUSG00000030641.10	5	15	14	1	0	0	73	20	9	8	18	8	0	1	3	12	0	0	0	10	38	0	13	16	30	6	0	1	2	10	6	0	16
ENSMUSG00000046691.13	391	1265	983	66	67	151	1772	619	480	295	768	359	152	47	120	679	419	413	635	393	298	161	626	439	582	444	199	155	207	205	120	58	169
ENSMUSG00000102372.1	0	0	0	0	0	0	0	0	0	0	0	0	0	0	0	0	0	0	0	0	0	0	0	0	0	0	0	0	0	0	0	0	0
ENSMUSG00000053293.9	13	101	30	10	0	7	124	42	27	23	46	25	25	3	11	31	24	16	58	27	20	12	43	15	25	26	14	9	6	17	17	3	5
ENSMUSG00000094432.1	0	0	0	0	0	0	0	0	0	0	0	0	0	0	0	0	0	0	0	0	0	0	0	0	0	0	0	0	0	0	0	0	0
ENSMUSG00000089576.1	0	0	0	0	0	0	0	0	0	0	0	0	0	0	0	0	0	0	0	0	0	0	0	0	0	0	0	0	0	0	0	0	0
ENSMUSG00000112860.1	0	0	0	0	0	0	0	0	0	0	0	0	0	0	0	0	0	0	0	0	0	0	0	0	2	2	0	0	0	0	0	0	0
ENSMUSG00000082490.1	0	0	0	0	0	0	0	0	0	0	0	0	0	0	0	0	0	0	0	0	0	0	0	0	0	0	0	0	0	0	0	0	0
ENSMUSG00000083828.1	0	0	0	0	0	0	0	0	0	0	0	0	0	0	0	0	0	0	0	0	0	0	0	0	0	0	0	0	0	0	0	0	0
ENSMUSG00000099015.1	0	0	0	0	0	0	0	0	0	0	0	0	0	0	0	0	0	0	0	0	0	0	0	0	0	0	0	0	0	0	0	0	0
ENSMUSG00000110477.1	0	0	0	0	0	0	0	0	0	0	0	0	0	0	0	0	0	0	0	0	0	0	0	0	0	0	0	0	0	0	0	0	0
ENSMUSG00000024277.14	277	700	200	80	119	239	701	119	74	100	75	56	41	54	63	203	279	548	585	366	348	36	189	104	355	50	49	186	75	251	302	210	204
ENSMUSG00000064044.2	0	0	0	0	0	0	0	0	0	0	0	0	0	0	0	0	0	0	0	0	0	0	0	0	0	0	0	0	0	0	0	0	0
ENSMUSG00000099498.1	0	0	0	0	0	0	0	0	0	0	0	0	0	0	0	0	0	0	0	0	0	0	0	0	0	0	0	0	0	0	0	0	0
ENSMUSG00000106839.1	0	0	0	0	0	0	0	0	0	0	0	0	0	0	0	0	0	0	0	0	0	0	0	0	0	0	0	0	0	0	0	0	0
ENSMUSG00000081325.1	0	0	0	0	0	0	1	0	1	0	2	0	0	0	0	0	0	0	1	0	0	3	1	0	0	0	0	0	0	0	0	0	0
ENSMUSG00000097561.1	0	0	0	0	0	0	0	0	0	0	2	0	0	0	0	0	0	0	0	0	0	0	0	0	0	0	0	0	0	0	0	0	0
ENSMUSG00000104902.1	0	0	0	0	0	0	0	0	0	0	0	0	0	0	0	0	0	0	0	0	0	0	0	0	0	0	0	0	0	0	0	0	0
ENSMUSG00000076469.3	13	40	52	4	0	15	446	55	44	27	289	24	21	6	19	38	37	44	32	25	20	28	43	23	78	39	29	18	26	20	9	6	6
ENSMUSG00000065745.1	0	0	0	0	0	0	0	0	0	0	0	0	0	0	0	0	0	0	0	0	0	0	0	0	0	0	0	0	0	0	0	0	0
ENSMUSG00000086957.1	0	0	0	0	0	0	0	0	0	0	0	0	0	0	0	0	0	0	0	0	0	0	0	0	0	0	0	0	0	0	0	0	0
ENSMUSG00000113123.1	0	0	0	0	0	0	0	0	0	0	0	0	0	0	0	0	0	0	0	0	0	0	0	0	0	0	0	0	0	0	0	0	0
ENSMUSG00000043881.9	54	253	213	17	40	11	118	15	25	25	76	42	25	12	17	28	110	67	24	22	40	12	45	47	205	21	40	16	9	23	55	3	21
ENSMUSG00000092049.8	0	0	0	0	0	0	0	0	0	0	0	0	0	0	0	0	0	0	0	0	0	0	0	0	0	0	0	0	0	0	0	0	0
ENSMUSG00000044499.11	0	0	0	0	0	0	0	0	0	0	0	0	0	0	0	0	0	0	0	0	0	0	0	0	0	0	0	0	0	0	0	0	0
ENSMUSG00000101181.1	0	0	0	0	0	0	0	0	0	0	0	0	0	0	0	0	0	0	0	0	0	0	0	0	0	0	0	0	0	0	0	0	0
ENSMUSG00000091813.4	0	0	0	0	0	0	0	0	0	0	0	0	0	0	0	0	0	0	0	0	0	0	0	0	0	0	0	0	0	0	0	0	0
ENSMUSG00000095178.1	0	0	0	0	0	0	3	0	0	0	0	0	0	0	0	0	0	0	0	0	0	0	0	0	2	0	0	0	0	0	0	0	0
ENSMUSG00000029213.11	357	1049	1024	45	14	89	945	223	130	195	298	134	69	54	77	252	418	245	341	252	214	47	292	249	755	93	88	125	76	138	207	81	107
ENSMUSG00000109968.1	0	0	0	0	0	0	0	0	0	0	0	0	0	0	0	0	0	0	0	0	0	0	0	0	0	0	0	0	0	0	0	0	0
ENSMUSG00000051986.6	0	0	0	0	0	0	0	0	0	0	0	0	0	0	0	0	0	0	0	0	0	0	0	0	0	0	0	0	0	0	0	0	0
ENSMUSG00000084454.1	0	0	0	0	0	0	0	0	0	0	0	0	0	0	0	0	0	0	0	0	0	0	0	0	0	0	0	0	0	0	0	0	0
ENSMUSG00000021360.16	191	676	951	39	47	108	525	168	212	133	62	241	123	38	60	163	339	180	289	40	45	92	440	151	870	215	211	125	152	100	195	166	88
ENSMUSG00000067173.3	0	0	0	0	0	0	0	0	0	0	0	0	0	0	0	0	0	0	0	0	0	0	0	0	0	0	0	0	0	0	0	0	0
ENSMUSG00000077661.1	0	0	0	0	0	0	0	0	0	0	0	0	0	0	0	0	0	0	0	0	0	0	0	0	0	0	0	0	0	0	0	0	0
ENSMUSG00000033177.13	0	4	0	0	0	2	7	1	7	0	0	6	0	0	0	1	0	0	0	0	0	0	0	0	1	1	2	0	0	2	0	0	0
ENSMUSG00000079598.3	0	0	0	0	1	0	56	2	0	2	1	2	0	1	2	7	0	0	2	1	2	2	1	0	1	0	1	0	0	0	0	0	0
ENSMUSG00000037740.8	126	88	77	18	8	34	565	132	50	128	202	60	19	31	51	134	116	39	121	59	74	28	137	100	156	75	46	65	55	18	0	13	40
ENSMUSG00000027655.14	33	115	9	20	0	2	174	17	8	43	42	16	4	8	16	31	15	104	28	17	19	19	53	22	22	30	17	37	16	3	36	2	12
ENSMUSG00000070695.4	0	0	0	0	0	0	0	0	0	0	0	0	0	0	0	0	0	0	0	0	0	0	0	0	0	0	0	0	0	0	0	0	0
ENSMUSG00000067616.11	0	0	0	0	0	0	0	0	0	0	0	0	0	0	0	0	0	0	0	0	0	0	0	0	0	0	0	0	0	0	0	0	0
ENSMUSG00000089037.1	0	0	0	0	0	0	0	0	0	0	0	0	0	0	0	0	0	0	0	0	0	0	0	0	0	0	0	0	0	0	0	0	0
ENSMUSG00000100016.3	0	0	0	0	0	0	0	0	0	0	0	0	0	0	0	0	0	0	0	0	0	0	0	0	0	0	0	0	0	0	0	0	0
ENSMUSG00000087100.1	0	0	0	0	0	0	0	0	0	0	0	0	0	0	0	0	0	0	0	0	0	0	0	0	0	0	0	0	0	0	0	0	0
ENSMUSG00000038545.13	8	53	2	0	0	1	35	10	10	12	47	3	9	2	0	19	0	24	5	6	10	0	16	10	5	5	0	1	1	0	0	0	0
ENSMUSG00000110504.1	0	0	0	0	0	0	0	0	0	0	0	0	0	0	0	0	0	0	0	0	0	0	0	0	0	0	0	0	0	0	0	0	0
ENSMUSG00000105648.1	0	0	0	0	0	0	0	0	0	0	0	0	0	0	0	0	0	0	0	0	0	0	0	0	0	0	0	0	0	0	0	0	0
ENSMUSG00000099525.1	0	0	0	0	0	0	0	0	0	0	0	0	0	0	0	0	0	0	0	0	0	0	0	0	0	0	0	0	0	0	0	0	0
ENSMUSG00000049090.2	35	83	88	10	11	10	102	28	3	26	47	16	1	3	18	33	1	16	28	12	47	4	25	45	30	18	21	12	1	16	4	14	9
ENSMUSG00000092559.1	0	0	0	0	0	0	0	0	0	0	0	0	0	0	0	0	0	0	0	0	0	0	0	0	0	0	0	0	0	0	0	0	0
ENSMUSG00000090622.1	0	0	0	0	0	0	0	7	0	3	1	0	0	0	0	0	0	0	0	0	0	0	1	0	0	0	0	0	0	1	0	0	0
ENSMUSG00000085766.1	0	0	0	0	0	0	0	0	0	0	0	0	0	0	0	0	0	0	0	0	0	0	0	0	0	0	0	0	0	0	0	0	0
ENSMUSG00000064554.1	0	0	0	0	0	0	0	0	0	0	0	0	0	0	0	0	0	0	0	0	0	0	0	0	0	0	0	0	0	0	0	0	0
ENSMUSG00000094942.7	0	25	9	0	0	0	26	17	4	9	19	5	11	4	3	14	1	0	10	33	9	0	5	15	22	1	3	0	2	2	0	0	5
ENSMUSG00000027223.15	0	0	0	6	0	0	2	8	0	0	0	0	0	0	2	0	0	0	0	0	7	0	0	6	0	0	1	0	0	0	0	0	0
ENSMUSG00000052040.10	123	627	669	64	13	109	934	132	148	266	258	116	58	55	114	297	192	343	314	106	137	96	279	169	405	204	122	90	77	66	141	127	81
ENSMUSG00000103145.1	0	0	0	0	0	0	0	0	0	0	0	0	0	0	0	0	0	0	0	0	0	0	0	0	0	0	0	0	0	0	0	0	0
ENSMUSG00000020937.14	6	0	0	3	5	0	10	12	1	20	0	2	0	3	5	2	4	0	4	3	5	1	5	7	11	0	0	0	0	3	0	0	5
ENSMUSG00000096370.8	1	5	0	0	0	0	23	6	0	2	14	3	12	1	1	0	0	0	0	0	0	0	3	4	9	1	1	0	0	0	0	0	0
ENSMUSG00000095205.1	0	0	0	0	0	0	0	0	0	0	1	0	0	0	0	0	0	0	0	0	0	0	0	0	0	0	0	0	0	0	0	0	0
ENSMUSG00000113633.1	0	0	0	0	0	0	0	0	0	0	0	0	0	0	0	0	0	0	0	0	0	0	0	0	5	0	0	0	0	0	0	0	0
ENSMUSG00000064289.15	248	1321	749	106	137	220	613	189	98	213	230	174	72	38	61	266	392	301	336	301	364	58	286	237	681	146	112	253	269	229	446	193	230
ENSMUSG00000025665.16	0	0	0	0	0	0	0	0	0	0	0	0	0	0	0	0	0	0	0	0	0	0	0	0	0	0	0	0	0	0	0	0	0
ENSMUSG00000108777.1	0	0	0	0	0	0	1	0	0	0	0	0	0	0	0	0	0	0	0	0	0	0	0	0	0	0	0	0	0	0	0	0	0
ENSMUSG00000083263.1	0	0	0	0	0	0	0	0	0	0	0	0	0	0	0	0	0	0	0	0	0	0	0	0	0	0	0	0	0	0	0	0	0
ENSMUSG00000031827.13	413	1066	496	199	153	191	4099	924	555	993	588	645	385	153	385	1356	623	489	658	471	573	345	1744	633	1486	871	255	379	392	304	217	239	260
ENSMUSG00000101691.1	0	0	0	0	0	0	0	0	0	0	0	0	0	0	0	0	0	0	0	0	0	0	0	0	0	0	0	0	0	0	0	0	0
ENSMUSG00000046108.3	0	0	0	0	0	0	0	0	0	0	0	0	0	0	0	0	0	0	0	0	0	0	0	0	0	0	0	0	0	0	0	0	0
ENSMUSG00000036555.14	6	60	62	6	5	18	105	27	18	23	61	9	3	4	13	26	43	0	25	34	27	9	33	33	57	8	11	4	35	5	10	9	10
ENSMUSG00000038486.9	0	0	10	8	0	0	8	0	5	2	15	2	0	1	2	3	0	9	1	2	0	0	2	5	5	0	5	4	0	3	0	0	0
ENSMUSG00000093751.1	0	0	0	0	0	0	0	0	0	0	0	0	0	0	0	0	0	0	0	0	0	0	0	0	0	0	0	0	0	0	0	0	0
ENSMUSG00000088895.1	0	0	0	0	0	0	0	0	0	0	0	0	0	0	0	0	0	0	0	0	0	0	0	0	0	0	0	0	0	0	0	0	0
ENSMUSG00000079625.2	14	0	3	0	0	0	1	4	0	0	0	0	0	0	0	3	0	0	0	0	0	0	4	0	4	1	0	0	0	0	0	0	0
ENSMUSG00000106274.1	0	0	0	0	0	0	0	0	0	0	0	0	0	0	0	0	0	0	0	0	0	0	0	0	0	0	0	0	0	0	0	0	0
ENSMUSG00000091368.1	0	0	0	0	0	0	0	0	0	0	0	0	0	0	0	0	0	0	0	0	0	0	0	0	0	0	0	0	0	0	0	0	0
ENSMUSG00000098334.1	0	0	0	0	0	0	0	0	0	0	0	0	0	0	0	0	0	0	0	0	0	0	0	0	0	0	0	0	0	0	0	0	0
ENSMUSG00000087610.1	0	0	0	0	0	0	0	0	0	3	0	0	0	0	0	0	0	0	0	0	0	0	0	0	0	0	2	0	0	0	0	0	0
ENSMUSG00000096880.1	0	0	0	0	0	0	0	0	0	0	0	0	0	0	0	0	0	0	0	0	0	0	0	0	0	0	0	0	0	0	0	0	0
ENSMUSG00000050050.17	0	0	0	0	0	0	1	2	0	0	0	0	0	0	0	0	0	0	11	0	0	0	0	2	2	0	0	0	0	2	0	0	0
ENSMUSG00000114379.1	0	0	0	0	0	0	0	0	0	0	0	0	0	0	0	0	0	0	0	0	0	0	0	0	0	0	0	0	0	0	0	0	0
ENSMUSG00000043897.12	0	0	0	0	0	0	0	0	0	0	0	0	0	0	0	0	0	0	0	0	0	0	0	0	0	0	0	0	0	0	0	0	0
ENSMUSG00000112442.1	0	47	68	0	0	0	72	12	4	11	18	3	2	4	4	15	24	65	14	4	18	0	15	8	18	7	1	4	1	1	3	0	1
ENSMUSG00000082072.1	1	1	2	0	1	0	1	1	1	0	0	1	0	0	0	0	0	26	0	3	13	0	0	1	10	1	1	2	3	1	5	9	5
ENSMUSG00000037295.7	48	255	119	37	13	30	480	96	64	82	62	67	41	28	45	145	69	124	161	82	97	27	160	103	189	79	31	82	48	41	67	28	53
ENSMUSG00000085227.1	10	43	11	9	0	2	64	9	16	20	20	27	5	3	2	11	9	0	41	13	8	0	27	11	60	11	7	0	8	3	4	7	2
ENSMUSG00000108804.1	0	0	0	0	0	0	0	0	0	0	0	0	0	0	0	0	0	0	0	0	0	0	0	0	0	0	0	0	0	0	0	0	0
ENSMUSG00000094497.1	0	0	0	0	1	0	3	0	0	1	1	1	0	0	0	1	0	0	0	0	0	0	1	1	0	1	0	0	0	0	0	0	0
ENSMUSG00000086392.9	7	0	0	0	0	0	0	0	0	0	7	1	0	0	0	0	13	0	10	1	0	0	4	4	13	0	0	0	0	0	0	0	0
ENSMUSG00000052759.7	0	0	0	0	0	0	0	0	0	0	0	0	0	0	0	0	0	0	0	0	0	0	0	0	0	0	0	0	0	0	0	0	0
ENSMUSG00000027274.16	21	27	86	8	0	0	70	16	14	14	17	17	21	3	11	22	11	29	72	24	13	6	11	31	132	15	13	33	3	1	4	0	9
ENSMUSG00000067235.14	5191	587	376	62	193	19	838	341	358	104	86	279	124	16	67	123	164	161	244	54	29	83	488	83	692	299	138	89	132	62	40	27	20
ENSMUSG00000092560.2	0	0	0	0	0	0	10	0	0	0	0	0	0	0	0	0	0	0	0	0	0	0	0	0	0	0	0	0	0	0	3	0	0
ENSMUSG00000110059.1	0	0	0	0	0	0	0	0	0	0	0	0	0	0	0	0	0	0	0	0	0	0	0	0	0	0	0	0	0	0	0	0	0
ENSMUSG00000088922.1	0	0	0	0	0	0	0	0	0	0	0	0	0	0	0	0	0	0	0	0	0	0	0	0	0	0	0	0	0	0	0	0	0
ENSMUSG00000105083.1	0	0	0	0	0	0	0	0	0	0	0	0	0	0	0	0	0	0	0	0	0	0	0	0	0	0	0	0	0	0	0	0	0
ENSMUSG00000101838.6	0	0	0	0	0	0	0	0	0	0	0	0	0	0	0	0	0	0	0	0	0	0	0	0	0	0	3	0	0	0	0	0	0
ENSMUSG00000106301.1	0	0	0	0	0	0	0	0	0	0	0	0	0	0	0	0	0	0	0	0	0	0	0	0	0	0	0	0	0	0	0	0	0
ENSMUSG00000115571.1	0	0	0	0	0	0	0	0	0	0	0	0	0	0	0	0	0	0	0	0	0	0	0	0	0	0	0	0	0	0	0	0	0
ENSMUSG00000028409.11	555	1419	1492	123	70	242	3027	676	454	525	763	333	262	120	236	617	407	586	631	382	393	231	723	610	887	529	421	206	163	154	242	175	174
ENSMUSG00000033004.15	408	1306	975	63	94	67	686	278	176	148	417	230	237	38	63	329	567	620	710	365	338	52	421	359	576	187	105	97	122	156	122	111	84
ENSMUSG00000065327.1	0	0	0	0	0	0	0	0	0	0	0	0	0	0	0	0	0	0	0	0	0	0	0	0	0	0	0	0	0	0	0	0	0
ENSMUSG00000046618.7	0	0	0	0	0	0	1	0	0	0	0	0	0	0	0	0	0	0	0	2	0	0	0	10	0	0	0	0	0	10	0	0	0
ENSMUSG00000062760.10	0	0	0	0	0	0	0	0	0	0	0	0	0	0	0	0	0	0	0	0	0	0	0	2	0	0	0	0	0	0	0	0	0
ENSMUSG00000104967.1	0	0	0	0	0	0	0	0	0	0	0	0	0	0	1	0	0	0	10	0	0	0	0	0	0	0	0	0	0	0	0	0	0
ENSMUSG00000020124.10	6082	12944	11948	1767	4577	7645	3849	914	568	277	1124	391	688	60	159	4639	8023	14816	10160	11953	9636	132	691	482	6693	269	266	6254	2885	6379	15930	11857	10551
ENSMUSG00000031446.14	651	1821	1347	411	1006	1678	568	100	54	81	248	76	86	24	34	1311	1124	2121	1067	2440	2141	52	155	128	558	114	80	1292	872	1473	3341	2674	2032
ENSMUSG00000025380.2	0	26	0	0	0	0	1	1	3	0	0	4	0	1	0	0	0	0	0	0	0	0	2	0	1	1	0	0	0	0	0	0	0
ENSMUSG00000113188.1	1	0	0	0	0	0	1	1	1	0	0	0	0	1	1	1	1	0	4	0	3	0	0	0	6	0	0	1	0	0	0	0	0
ENSMUSG00000114406.1	0	0	0	0	0	0	0	0	0	0	0	0	0	0	0	0	0	0	0	0	0	0	0	0	0	0	0	0	0	0	0	0	0
ENSMUSG00000109430.1	0	0	0	0	0	0	0	0	0	0	0	0	0	0	0	0	0	0	0	0	0	0	0	0	0	0	0	0	0	0	0	0	0
ENSMUSG00000086539.8	0	0	2	0	0	0	0	0	0	0	0	0	0	0	0	0	0	0	0	0	0	0	0	0	0	0	0	0	0	0	0	0	0
ENSMUSG00000102464.2	0	0	0	0	0	0	0	0	0	0	0	0	0	0	0	0	0	0	0	0	0	0	0	0	0	0	0	0	0	0	0	0	0
ENSMUSG00000014602.15	0	0	0	0	0	0	0	2	0	0	1	0	0	0	0	0	0	0	0	0	0	0	0	0	0	0	0	0	0	0	0	0	0
ENSMUSG00000094524.1	0	0	0	0	0	0	0	0	0	0	0	0	0	0	0	0	0	0	0	0	0	0	0	0	0	0	0	0	0	0	0	0	0
ENSMUSG00000112952.1	0	0	0	0	0	0	2	0	0	0	0	1	0	0	0	0	0	0	0	0	0	0	0	1	0	0	0	0	0	0	0	0	0
ENSMUSG00000014776.7	0	0	0	0	0	0	0	0	0	0	0	0	0	0	0	0	0	0	0	0	3	0	0	8	0	0	0	0	0	0	0	0	0
ENSMUSG00000047810.8	31	220	98	45	45	22	1029	194	303	138	384	218	146	27	70	224	153	195	106	53	86	83	428	116	229	239	60	160	189	64	74	53	55
ENSMUSG00000107047.1	0	0	0	0	0	0	0	0	0	0	0	0	0	0	0	0	0	0	0	0	0	0	0	0	0	0	0	0	0	0	0	0	0
ENSMUSG00000105110.1	0	0	0	0	0	0	0	0	0	0	0	0	0	0	0	0	0	0	0	0	0	0	0	0	0	0	0	0	0	0	0	0	0
ENSMUSG00000071660.10	138	499	459	9	39	77	591	201	145	102	260	100	95	27	43	203	247	235	184	157	175	62	204	148	318	77	76	140	98	91	132	84	120
ENSMUSG00000099107.1	0	0	0	0	0	0	0	0	0	0	0	0	0	0	0	0	0	0	0	0	0	0	0	0	0	0	0	0	0	0	0	0	0
ENSMUSG00000110569.1	0	0	0	0	0	0	0	0	0	0	0	0	0	0	0	0	0	0	0	0	0	0	0	0	6	0	0	0	0	0	0	0	0
ENSMUSG00000051236.13	10	8	0	0	8	0	7	4	0	5	7	2	0	0	3	0	19	15	0	12	8	1	1	19	9	0	1	0	0	0	5	0	0
ENSMUSG00000039552.14	0	0	0	0	0	0	0	0	0	0	0	0	0	0	0	0	0	0	0	0	0	0	0	3	0	0	0	0	0	0	0	0	0
ENSMUSG00000081417.1	0	0	0	0	0	0	0	0	0	0	0	0	0	0	0	0	0	0	0	0	0	0	0	0	0	0	0	0	0	0	0	0	0
ENSMUSG00000018907.10	0	0	0	0	0	0	6	3	0	0	9	0	0	0	0	0	0	0	0	0	0	0	0	0	0	0	0	3	0	0	0	0	0
ENSMUSG00000097653.2	0	0	0	0	0	0	0	0	0	0	0	0	0	0	0	0	0	0	0	0	0	0	0	0	0	0	0	0	0	0	0	0	0
ENSMUSG00000105593.4	0	0	0	0	0	0	0	0	0	0	0	0	0	0	0	0	0	0	0	0	0	0	0	0	0	0	0	0	0	0	0	0	0
ENSMUSG00000037994.14	0	0	29	0	0	0	13	1	0	0	0	1	0	0	0	0	0	0	0	0	1	0	0	1	0	3	1	0	0	0	0	0	0
ENSMUSG00000113215.1	0	0	0	0	0	0	0	0	0	0	0	0	0	0	0	0	0	0	0	0	0	0	0	0	0	0	0	0	0	0	0	0	0
ENSMUSG00000087165.7	21	33	1	0	2	0	34	3	0	4	16	2	0	0	4	1	4	0	8	6	3	0	12	7	15	7	1	0	0	5	3	1	0
ENSMUSG00000092021.8	18	18	0	16	0	0	128	83	31	36	63	46	52	2	9	26	33	57	0	18	17	16	47	28	12	41	41	14	1	11	0	0	4
ENSMUSG00000101273.1	0	0	0	0	0	0	0	0	0	0	0	0	0	0	0	0	0	0	0	0	0	0	0	0	0	0	0	0	0	0	0	0	0
ENSMUSG00000091905.3	2	23	14	1	3	6	6	0	1	0	0	0	1	0	0	5	9	14	7	21	8	0	0	1	5	1	1	5	2	12	12	9	12
ENSMUSG00000032834.11	86	230	64	19	15	24	320	114	54	62	96	69	52	17	27	123	116	56	135	46	63	54	136	95	124	93	42	30	45	33	17	55	31
ENSMUSG00000021944.15	0	0	0	0	0	0	0	0	0	0	0	0	0	0	0	0	0	0	0	0	0	0	0	0	0	0	0	0	0	0	0	0	0
ENSMUSG00000113698.1	0	0	0	0	0	0	0	0	0	0	0	0	0	0	0	0	0	0	0	0	0	0	0	0	0	0	0	0	0	0	0	0	0
ENSMUSG00000111761.1	0	0	0	0	0	0	1	1	0	0	0	0	0	0	0	0	0	0	0	0	0	0	0	0	0	0	0	0	0	0	0	0	0
ENSMUSG00000081391.1	0	0	0	0	0	0	0	0	0	0	0	0	0	0	0	0	0	0	0	0	0	0	0	0	0	0	0	0	0	0	0	0	0
ENSMUSG00000028028.11	19	207	99	3	14	14	42	40	7	42	30	16	6	5	7	27	50	33	32	22	25	5	101	60	104	33	13	47	24	35	24	12	31
ENSMUSG00000063900.5	0	0	0	0	0	0	0	0	0	0	0	0	0	0	0	0	0	0	0	0	0	0	0	0	0	0	0	0	0	0	0	0	0
ENSMUSG00000020175.14	0	0	0	0	0	0	2	3	0	0	0	2	6	0	1	8	3	0	0	5	1	2	16	1	15	1	0	0	0	0	0	0	0
ENSMUSG00000042808.8	0	0	0	0	0	0	0	0	0	0	0	0	0	0	0	0	0	0	0	0	0	0	0	5	0	0	0	0	0	0	0	0	0
ENSMUSG00000082729.3	0	0	0	0	0	0	0	0	0	0	0	0	0	0	0	0	0	0	0	0	0	0	0	0	0	1	0	0	0	0	0	1	0
ENSMUSG00000031065.14	81	231	126	24	91	52	272	68	41	48	98	33	33	17	34	106	73	92	66	93	86	23	117	84	143	46	39	29	33	18	25	50	30
ENSMUSG00000030866.8	0	0	0	0	0	0	0	0	0	0	0	0	0	0	0	0	0	0	0	0	0	0	0	0	0	0	0	0	0	0	0	0	0
ENSMUSG00000032402.12	45	100	225	10	29	14	265	89	30	69	87	29	18	12	44	85	53	88	52	41	97	19	80	83	151	61	24	35	52	38	14	1	12
ENSMUSG00000100108.1	0	0	0	0	0	0	0	0	0	0	0	0	0	0	0	0	0	0	0	0	0	0	0	0	0	0	0	0	0	0	0	0	0
ENSMUSG00000051029.8	0	0	0	0	0	0	49	11	0	3	0	3	0	0	6	6	2	0	0	2	0	0	6	2	3	2	0	16	0	0	0	0	8
ENSMUSG00000074196.10	0	0	0	0	0	0	0	0	0	0	0	0	0	0	0	0	0	0	0	0	0	0	0	0	0	0	0	0	0	0	0	0	0
ENSMUSG00000030844.11	3936	3149	4437	226	80	369	3920	1511	1311	596	1127	1035	827	374	461	1123	2020	3318	3166	449	400	258	2187	495	6996	318	408	228	285	530	360	142	190
ENSMUSG00000098399.1	0	0	0	0	0	0	0	0	0	0	0	0	0	0	0	0	0	0	0	0	0	0	0	0	0	0	0	0	0	0	0	0	0
ENSMUSG00000105620.1	0	0	0	0	0	0	0	0	0	0	0	0	0	0	0	0	0	0	0	0	0	0	0	0	0	0	0	0	0	0	0	0	0
ENSMUSG00000001773.14	0	0	0	0	0	0	2	5	0	7	0	0	0	0	2	0	0	0	0	0	2	0	0	8	0	0	0	0	0	0	0	0	0
ENSMUSG00000096462.1	0	0	0	0	0	0	0	0	0	0	0	0	0	0	0	0	0	0	0	0	0	0	0	0	0	0	0	0	0	0	0	0	0
ENSMUSG00000061517.8	0	0	0	0	0	0	0	0	0	0	0	0	0	0	0	0	0	0	0	0	0	0	0	0	0	0	0	0	0	0	0	0	0
ENSMUSG00000114890.1	0	0	0	0	0	0	0	0	0	0	0	0	0	0	0	0	0	0	0	0	0	0	0	0	0	0	0	0	0	0	0	0	0
ENSMUSG00000085858.1	0	0	0	0	0	0	0	0	0	0	0	0	0	0	0	0	0	0	0	0	0	0	0	0	0	0	0	0	0	0	0	0	0
ENSMUSG00000064646.1	0	0	0	0	0	0	0	0	0	0	0	0	0	0	0	0	0	0	0	0	0	0	0	0	0	0	0	0	0	0	0	0	0
ENSMUSG00000100082.1	0	0	0	0	0	0	0	0	0	0	0	0	0	0	0	0	0	0	0	0	0	0	0	0	0	0	0	0	0	0	0	0	0
ENSMUSG00000041734.15	0	0	0	0	0	0	0	0	0	0	0	0	0	0	0	0	0	0	0	0	1	0	0	1	0	0	0	0	0	0	0	0	0
ENSMUSG00000094079.1	0	0	0	0	0	0	0	0	0	0	0	0	0	0	0	0	0	0	0	0	0	0	0	0	0	0	0	0	0	0	0	0	0
ENSMUSG00000020405.4	0	0	0	0	0	0	0	0	0	0	4	0	0	0	0	0	0	0	0	0	0	0	0	0	0	0	0	0	0	0	0	0	0
ENSMUSG00000103237.1	0	0	0	0	0	0	0	0	0	0	0	0	0	0	0	0	0	0	0	0	0	0	0	0	0	0	0	0	0	0	0	0	0
ENSMUSG00000031129.9	106	128	224	5	0	4	199	53	4	54	372	21	30	12	32	73	44	16	54	49	45	27	52	93	78	55	33	18	24	27	12	34	35
ENSMUSG00000052221.8	0	0	0	0	0	0	0	0	0	0	0	0	0	0	0	0	0	0	0	0	0	0	1	0	0	0	0	0	0	0	0	0	0
ENSMUSG00000113725.1	0	0	0	0	0	0	1	0	0	0	0	0	0	0	0	0	0	0	0	0	0	0	0	0	0	0	0	0	0	0	0	0	0
ENSMUSG00000006299.13	119	481	194	46	40	95	1103	222	137	215	244	168	69	57	92	418	175	209	264	117	166	85	373	187	392	280	117	114	159	102	120	90	113
ENSMUSG00000108869.1	0	0	0	0	0	0	0	0	0	0	0	0	0	0	0	0	0	0	0	0	0	0	0	0	0	0	0	0	0	0	0	0	0
ENSMUSG00000083355.1	0	0	0	0	0	0	0	0	0	0	0	0	0	0	0	0	0	0	0	0	0	0	0	0	0	0	0	0	0	0	0	0	0
ENSMUSG00000106932.1	0	0	0	0	0	0	0	0	0	0	0	0	0	0	0	0	0	0	0	0	0	0	0	0	0	0	0	0	0	0	0	0	0
ENSMUSG00000101783.1	0	0	0	0	0	0	0	0	0	0	0	0	0	0	0	0	0	0	0	0	0	0	0	0	0	0	0	0	0	0	0	0	0
ENSMUSG00000099591.1	0	0	0	0	0	0	0	0	0	0	0	0	0	0	0	0	0	0	0	0	0	0	0	0	0	0	0	0	0	0	0	0	0
ENSMUSG00000029848.11	0	0	0	0	0	0	0	0	0	0	3	0	0	0	0	0	0	0	0	0	0	0	0	0	0	0	0	0	0	0	0	0	0
ENSMUSG00000029282.3	0	0	0	0	0	0	0	0	0	0	0	0	0	0	0	0	0	0	0	0	0	0	0	0	0	0	0	0	0	0	0	0	0
ENSMUSG00000101300.6	0	0	0	0	0	0	0	0	0	0	0	0	0	0	0	0	0	0	0	0	0	0	0	0	0	0	0	0	0	0	0	0	0
ENSMUSG00000093843.1	0	0	0	0	0	0	0	0	0	0	0	0	0	0	0	0	0	0	0	0	0	0	0	0	0	0	0	0	0	0	0	0	0
ENSMUSG00000088987.1	0	0	0	0	0	0	0	0	0	0	0	0	0	0	0	0	0	0	0	0	0	0	0	0	0	0	0	0	0	0	0	0	0
ENSMUSG00000034258.4	0	0	0	0	0	0	0	0	0	0	0	0	0	0	0	0	0	0	0	0	0	0	0	5	0	0	0	0	0	0	0	2	0
ENSMUSG00000036641.9	0	0	4	0	0	0	2	1	0	4	13	0	0	0	1	2	0	0	0	0	0	0	1	2	0	0	1	0	2	0	0	0	0
ENSMUSG00000115153.1	0	0	0	0	0	0	0	0	0	0	0	0	0	0	0	0	0	0	0	0	0	0	0	0	0	0	0	0	0	0	0	0	0
ENSMUSG00000106366.1	0	0	0	0	0	0	0	0	0	0	0	0	0	0	0	0	0	0	0	0	0	0	0	0	0	0	0	0	0	0	0	0	0
ENSMUSG00000086001.1	0	0	0	0	0	0	0	0	0	0	0	0	0	0	0	0	0	0	0	0	0	0	0	0	0	0	0	0	0	0	0	0	0
ENSMUSG00000002908.17	0	0	0	0	0	0	5	0	0	0	0	0	0	0	1	2	0	0	0	1	0	0	1	2	0	0	0	0	0	0	0	0	5
ENSMUSG00000098426.1	0	0	0	0	0	0	0	0	0	0	0	0	0	0	0	0	0	0	0	0	0	0	0	0	0	0	0	0	0	0	0	0	0
ENSMUSG00000039770.5	3159	2916	2986	933	1578	3030	2015	614	580	254	577	370	372	72	153	1153	1875	3174	3003	2495	2625	80	748	291	3971	174	209	1435	858	1625	3742	2342	2429
ENSMUSG00000026931.10	0	0	0	0	0	0	0	0	0	0	0	0	0	0	0	0	0	0	0	0	0	0	0	0	0	0	0	0	0	0	0	0	0
ENSMUSG00000086484.1	0	0	0	0	0	0	0	0	0	0	81	0	0	0	0	0	0	0	0	0	0	0	0	0	0	0	0	0	0	1	0	0	0
ENSMUSG00000027858.13	822	1054	783	9	12	14	492	114	102	39	230	144	148	19	29	91	671	1077	904	99	58	30	198	97	885	41	38	114	29	98	76	7	29
ENSMUSG00000102046.1	0	0	0	0	0	0	0	0	0	0	0	0	0	0	0	0	0	0	0	0	0	0	0	0	0	0	0	0	0	0	0	0	0
ENSMUSG00000109012.1	0	0	0	0	0	0	0	0	0	0	0	0	0	0	0	0	0	0	0	0	0	0	0	0	0	0	0	0	0	0	0	0	0
ENSMUSG00000029416.17	164	566	505	22	25	14	335	175	95	113	138	103	68	24	39	278	284	181	367	185	141	69	360	274	375	179	125	180	123	137	81	48	78
ENSMUSG00000003382.18	143	590	442	27	25	32	371	72	37	117	217	70	54	29	31	169	217	204	131	114	138	43	148	111	265	90	44	31	51	78	43	58	60
ENSMUSG00000112534.1	0	0	0	0	0	0	0	0	0	0	0	0	0	0	0	0	0	0	0	0	0	0	0	0	0	0	0	0	0	0	0	0	0
ENSMUSG00000107678.1	0	0	0	0	0	0	0	0	0	0	0	0	0	0	0	0	0	0	0	0	0	0	0	0	0	0	0	0	0	0	0	0	0
ENSMUSG00000082164.1	0	0	0	0	0	0	0	0	0	0	0	0	0	0	0	0	0	0	0	0	0	0	0	0	0	0	0	0	0	0	0	0	0
ENSMUSG00000089130.1	0	0	0	0	0	0	0	0	0	0	0	0	0	0	0	0	0	0	0	0	0	0	0	0	0	0	0	0	0	0	0	0	0
ENSMUSG00000073943.4	0	0	0	0	0	0	0	0	0	0	0	0	0	0	0	0	0	0	0	0	0	0	0	0	0	0	0	0	0	0	0	0	0
ENSMUSG00000100592.1	0	0	0	0	0	0	0	0	0	0	0	0	0	0	0	0	0	0	0	0	0	0	0	0	0	0	0	0	0	0	0	0	0
ENSMUSG00000032021.14	5	38	105	1	9	29	160	48	18	44	10	35	4	11	16	42	38	12	32	36	18	13	32	36	42	22	8	7	18	20	45	55	7
ENSMUSG00000052675.11	16	3	0	1	0	0	56	1	0	12	9	1	0	2	4	0	0	0	0	7	11	0	9	1	25	2	5	0	4	0	0	0	0
ENSMUSG00000094589.1	0	0	0	0	0	0	0	0	0	0	0	0	0	0	0	0	0	0	0	0	0	0	0	0	0	0	0	0	0	0	0	0	0
ENSMUSG00000047875.6	4	4	0	0	0	0	12	6	0	2	1	1	0	1	0	9	7	0	9	4	6	0	1	2	0	2	0	0	0	0	8	16	1
ENSMUSG00000026663.6	116	608	816	72	68	114	789	212	146	242	135	124	194	55	66	231	296	366	274	179	230	82	281	296	357	166	171	157	128	86	173	100	57
ENSMUSG00000101810.1	0	0	0	0	0	0	0	0	0	0	0	0	0	0	0	0	0	0	0	0	0	0	0	0	0	0	0	0	0	0	0	0	0
ENSMUSG00000096972.7	0	0	0	0	0	0	0	0	0	0	0	0	0	0	0	0	0	0	0	0	0	0	0	0	0	0	0	0	0	0	0	0	0
ENSMUSG00000092652.1	0	0	0	0	0	0	0	0	0	0	0	0	0	0	0	0	0	0	0	0	0	0	0	0	0	0	0	0	0	0	0	0	0
ENSMUSG00000041353.12	206	298	482	54	63	362	436	47	63	26	70	22	7	6	13	135	274	547	315	292	251	8	59	61	273	19	16	64	48	175	226	243	193
ENSMUSG00000110031.1	0	0	0	0	0	0	0	0	0	0	0	0	0	0	0	0	0	0	0	0	0	0	0	0	0	0	0	0	0	0	0	0	0
ENSMUSG00000105175.1	0	0	0	0	0	0	0	0	0	0	0	0	0	0	0	0	0	0	0	0	0	0	0	0	1	0	0	0	0	0	0	0	0
ENSMUSG00000097235.1	0	0	0	0	0	0	3	0	0	0	0	0	0	0	1	0	0	0	0	0	0	0	0	0	0	0	0	0	0	0	0	0	0
ENSMUSG00000034768.4	0	0	0	0	0	0	2	0	0	0	0	0	0	0	0	0	0	0	0	0	1	0	0	0	0	0	0	0	0	0	0	0	0
ENSMUSG00000115663.1	0	0	0	0	0	0	0	0	0	0	0	0	0	0	0	0	0	0	0	0	0	0	0	0	0	0	0	0	0	0	0	0	0
ENSMUSG00000046721.11	41	60	69	2	7	9	111	33	34	34	28	17	31	1	10	26	43	38	26	26	25	7	31	49	59	23	13	12	21	17	10	3	14
ENSMUSG00000085293.2	0	0	0	0	0	0	0	0	0	0	0	0	0	0	0	0	0	0	0	0	0	0	0	0	0	0	0	0	0	0	0	0	0
ENSMUSG00000024099.14	463	617	650	83	150	255	2000	435	270	393	535	206	111	78	189	325	246	268	296	453	390	91	392	414	569	195	177	115	118	201	200	239	213
ENSMUSG00000020708.12	190	219	324	126	168	423	1657	337	207	282	386	142	73	58	126	276	122	234	159	272	352	63	362	265	356	234	121	126	126	120	224	125	137
ENSMUSG00000064081.3	0	0	0	0	1	0	0	0	0	0	0	0	0	0	0	0	0	0	0	0	0	0	0	0	0	0	0	0	0	0	0	0	0
ENSMUSG00000047648.13	143	531	194	66	257	427	185	62	31	29	57	38	62	3	16	459	201	588	251	626	640	10	53	36	409	101	174	424	263	263	837	348	447
ENSMUSG00000111343.1	0	0	0	0	0	0	24	0	0	5	2	0	0	0	3	0	0	0	0	0	2	0	0	0	0	0	1	0	0	1	0	0	0
ENSMUSG00000029467.15	50	69	52	29	24	15	277	58	47	41	63	51	33	19	20	81	61	24	120	30	54	5	65	73	97	71	53	51	13	15	5	48	19
ENSMUSG00000041052.8	0	0	0	0	0	0	0	0	1	0	0	0	0	0	0	1	0	0	0	0	0	0	0	0	0	0	0	0	0	0	0	0	0
ENSMUSG00000102556.1	0	0	0	0	0	0	0	0	0	0	0	0	0	0	0	0	0	0	0	0	0	0	0	0	0	0	0	0	0	0	0	0	0
ENSMUSG00000107705.1	0	0	0	0	0	0	0	0	0	0	0	0	0	0	0	0	0	0	0	0	0	0	0	0	0	0	0	0	0	0	0	0	0
ENSMUSG00000093398.1	0	0	0	0	0	0	0	0	0	0	0	0	0	0	0	0	0	0	0	0	0	0	0	0	0	0	0	0	0	0	0	0	0
ENSMUSG00000021182.15	149	968	876	45	49	122	1028	168	118	192	227	134	38	50	95	372	331	336	320	261	217	48	429	214	331	203	104	186	101	106	166	79	131
ENSMUSG00000082674.1	0	0	0	0	0	0	0	0	0	0	0	0	0	0	0	0	0	0	0	1	0	0	0	0	0	0	1	0	0	0	0	0	0
ENSMUSG00000089640.1	0	0	0	0	0	0	4	0	0	0	0	0	0	0	0	0	0	0	0	0	0	0	0	0	0	0	0	0	0	0	0	0	0
ENSMUSG00000107139.1	0	0	0	0	0	0	0	0	0	0	0	0	0	0	0	0	0	0	0	0	0	0	0	0	0	0	0	0	0	0	0	0	0
ENSMUSG00000061143.15	13	6	25	0	0	0	26	8	3	4	16	4	2	2	2	7	10	67	34	5	0	0	21	5	83	1	0	1	1	1	0	3	1
ENSMUSG00000105202.1	0	0	0	0	0	0	0	0	0	0	0	0	0	0	0	0	0	0	0	0	0	0	0	0	0	0	0	0	0	0	0	0	0
ENSMUSG00000114472.1	0	0	0	0	0	0	0	0	0	0	0	0	0	0	0	0	0	0	0	0	0	0	0	0	0	0	0	0	0	0	0	0	0
ENSMUSG00000094616.7	0	0	0	0	0	0	0	0	0	0	0	0	0	0	0	0	0	0	0	0	0	0	0	0	0	0	0	0	0	0	0	0	0
ENSMUSG00000024992.13	19	0	0	0	0	0	0	0	0	0	0	0	0	0	0	0	0	0	0	0	0	0	0	0	0	0	0	0	0	0	0	0	0
ENSMUSG00000085320.1	0	0	0	0	0	0	0	0	0	0	0	0	0	0	0	0	0	0	0	0	0	0	0	0	0	0	0	0	0	0	0	0	0
ENSMUSG00000097745.1	0	0	0	0	0	0	0	0	0	0	0	0	0	0	0	0	0	0	0	0	0	0	0	0	0	0	0	0	0	0	0	0	0
ENSMUSG00000022853.6	151	130	5	11	3	0	57	7	8	19	56	9	0	2	12	20	37	0	27	25	13	7	9	18	36	27	11	1	0	11	0	12	4
ENSMUSG00000090779.1	0	0	0	0	0	0	0	0	0	0	0	0	0	0	0	0	0	0	0	0	0	0	0	0	0	0	0	0	0	0	0	0	0
ENSMUSG00000112089.1	0	0	0	0	0	0	0	0	0	0	0	0	0	0	0	0	0	0	0	0	0	0	0	0	0	0	0	0	0	0	0	0	0
ENSMUSG00000011427.16	16	187	174	11	0	17	133	30	61	28	72	25	31	10	10	43	66	72	100	65	37	18	40	39	103	32	21	30	34	16	6	16	36
ENSMUSG00000059252.5	33	14	31	9	10	78	42	11	4	3	14	6	1	0	7	19	31	101	48	24	20	1	15	2	61	2	1	10	0	19	9	41	15
ENSMUSG00000030082.14	489	1007	458	72	54	180	2468	565	358	517	493	242	151	95	164	665	329	465	356	286	296	214	683	502	692	512	226	204	192	196	158	166	141
ENSMUSG00000113307.1	0	0	0	0	0	0	0	0	0	0	0	0	0	0	0	0	0	0	0	0	0	0	0	0	0	0	0	0	0	0	0	0	0
ENSMUSG00000108331.1	0	0	0	0	0	0	0	0	0	0	0	0	0	0	0	0	0	0	0	0	0	0	0	0	0	0	0	0	0	0	0	0	0
ENSMUSG00000101365.1	0	0	0	0	0	0	1	0	0	1	0	0	0	0	0	0	0	0	0	0	0	0	0	0	2	1	0	0	0	0	0	0	0
ENSMUSG00000111853.1	0	0	0	0	0	0	0	0	0	0	0	0	0	0	0	0	0	0	0	0	0	0	0	0	0	0	0	0	0	0	0	0	0
ENSMUSG00000062963.10	549	844	575	126	104	108	2188	395	241	341	391	177	139	74	165	386	247	378	271	227	261	100	445	381	528	254	220	185	197	134	123	51	164
ENSMUSG00000081483.1	0	0	0	0	0	0	0	0	0	0	0	0	0	0	0	0	0	0	0	0	0	0	0	0	0	0	0	0	0	0	0	0	0
ENSMUSG00000037924.6	0	0	0	0	0	0	0	0	0	0	0	0	0	0	0	0	0	0	0	0	0	0	0	0	0	0	0	0	0	0	0	0	0
ENSMUSG00000058589.14	0	0	0	0	4	0	1	0	0	9	0	0	0	0	1	0	4	0	0	12	9	0	0	1	6	0	2	0	0	9	0	0	0
ENSMUSG00000082701.1	0	0	0	0	0	0	0	0	0	0	0	0	0	0	0	0	0	0	0	0	0	0	0	0	0	0	0	0	0	0	0	0	0
ENSMUSG00000104011.1	0	0	0	0	0	0	0	0	0	0	0	0	0	0	0	0	0	0	0	0	0	0	0	0	0	0	0	0	0	0	0	0	0
ENSMUSG00000098008.1	0	0	0	0	0	0	4	0	0	0	0	0	0	0	0	0	0	0	0	9	0	0	0	1	0	0	0	0	0	0	0	0	0
ENSMUSG00000091971.3	0	3	0	0	1	14	60	6	22	3	0	2	5	1	1	4	0	1	27	2	10	0	7	14	7	7	13	0	7	0	0	1	0
ENSMUSG00000046145.7	0	0	0	0	0	0	0	0	0	0	0	0	0	0	0	0	0	0	0	0	0	0	0	0	0	0	0	0	0	0	0	0	0
ENSMUSG00000057230.13	140	798	631	58	65	112	980	143	93	121	436	116	55	38	74	246	241	380	389	208	150	59	156	185	317	119	126	139	61	68	45	83	72
ENSMUSG00000036377.18	95	76	178	0	13	42	178	45	50	11	36	58	22	12	14	46	73	112	104	20	6	19	84	7	323	20	13	1	18	33	57	46	4
ENSMUSG00000104494.1	0	0	0	0	0	0	0	0	0	0	0	0	0	0	0	0	0	0	0	0	0	0	0	0	0	0	0	0	0	0	0	0	0
ENSMUSG00000029086.15	4	0	0	0	15	0	11	3	2	0	2	6	19	2	0	2	0	0	0	10	4	6	0	6	0	4	6	0	0	0	0	0	0
ENSMUSG00000018196.18	164	113	195	82	76	359	371	77	71	62	119	35	35	14	30	99	117	141	108	196	162	1	69	81	90	43	41	105	24	108	217	124	57
ENSMUSG00000096554.1	0	0	0	0	0	0	0	0	0	0	0	0	0	0	0	0	0	0	0	0	0	0	0	0	0	0	0	0	0	0	0	0	0
ENSMUSG00000114982.1	0	0	0	0	0	0	0	0	0	0	0	0	0	0	0	0	0	0	0	0	0	0	0	0	0	0	0	0	0	0	0	0	0
ENSMUSG00000033460.14	7	8	5	0	0	0	58	13	5	8	51	14	12	9	13	6	0	9	105	3	1	2	36	11	58	2	1	0	0	5	0	0	0
ENSMUSG00000090806.1	0	0	0	0	0	0	0	0	0	0	0	0	0	0	0	0	0	0	0	0	0	0	0	0	0	0	0	0	0	0	0	0	0
ENSMUSG00000064738.1	0	0	0	0	0	0	0	0	0	0	0	0	0	0	0	0	0	0	0	0	0	0	0	0	0	0	0	0	0	0	0	0	0
ENSMUSG00000112116.1	0	0	0	0	0	0	0	0	0	0	0	0	0	0	0	0	0	0	0	0	0	0	0	0	0	0	0	0	0	0	0	0	0
ENSMUSG00000109077.1	0	0	0	0	0	0	0	0	0	0	0	0	0	0	0	0	0	0	0	0	0	0	0	0	0	0	0	0	0	0	0	0	0
ENSMUSG00000085830.1	0	0	0	0	0	0	0	0	0	0	0	0	0	0	0	0	0	0	0	0	0	0	0	0	0	0	0	0	0	0	0	0	0
ENSMUSG00000086066.7	0	0	0	0	0	0	0	0	0	0	0	0	0	0	0	0	0	0	0	0	0	0	0	0	0	0	0	0	0	0	0	0	0
ENSMUSG00000100174.1	0	0	0	0	0	0	0	0	0	0	0	0	0	0	0	0	0	0	0	0	0	0	0	0	0	0	0	0	0	0	0	0	0
ENSMUSG00000044350.14	1	13	0	9	0	0	28	13	1	4	3	3	5	0	1	8	10	0	16	1	7	11	14	8	5	2	1	24	3	2	4	0	0
ENSMUSG00000107140.1	0	0	0	0	0	0	0	0	0	0	0	0	0	0	0	0	0	0	0	0	0	0	0	0	0	0	0	0	0	0	0	0	0
ENSMUSG00000031101.6	656	1742	2036	182	168	324	4230	944	732	709	1674	653	326	182	357	1472	984	1112	1136	807	732	253	1384	914	1600	841	540	444	495	401	414	361	333
ENSMUSG00000112599.1	0	12	4	0	0	0	2	0	0	1	2	0	0	0	0	0	0	0	0	0	0	0	3	0	21	0	0	0	0	0	0	0	0
ENSMUSG00000103329.2	0	0	0	0	0	0	0	0	0	0	0	0	0	0	0	0	0	0	0	0	0	0	0	0	0	0	0	0	0	0	0	0	0
ENSMUSG00000089195.1	0	0	0	0	0	0	0	0	0	0	0	0	0	0	0	0	0	0	0	0	0	0	0	0	0	0	0	0	0	0	0	0	0
ENSMUSG00000059762.4	0	0	0	0	0	0	0	0	0	0	0	0	0	0	0	0	0	0	0	0	0	0	0	0	0	0	0	0	0	0	0	0	0
ENSMUSG00000040549.16	56	515	265	16	33	53	786	233	85	147	509	138	122	34	68	161	213	200	177	186	239	74	118	195	306	135	100	106	49	107	54	127	69
ENSMUSG00000110662.1	0	0	0	0	0	0	0	0	0	0	0	0	0	0	0	0	0	0	0	0	0	0	0	0	0	0	0	0	0	0	0	0	0
ENSMUSG00000113817.1	0	0	0	0	0	0	0	0	0	0	0	0	0	0	0	0	0	0	0	0	0	0	0	0	0	0	0	0	0	0	0	0	0
ENSMUSG00000083447.1	0	0	0	0	0	0	0	0	0	0	0	0	0	0	0	0	0	0	0	0	0	0	0	0	0	0	0	0	0	0	0	0	0
ENSMUSG00000081510.1	0	0	0	0	0	0	0	0	0	0	0	0	0	0	0	0	0	0	0	0	0	0	0	0	0	0	0	0	0	0	0	0	0
ENSMUSG00000055240.16	129	330	517	9	22	24	164	61	41	30	152	44	28	7	21	47	154	159	153	94	77	6	57	59	438	22	17	22	21	23	40	11	40
ENSMUSG00000099683.1	0	0	0	0	0	0	0	0	0	0	0	0	0	0	0	0	0	0	0	0	0	0	0	0	0	0	0	0	0	0	0	0	0
ENSMUSG00000094051.6	0	21	0	0	0	0	0	5	0	2	6	3	0	1	2	2	0	0	0	16	1	1	3	10	0	1	2	0	0	0	0	0	0
ENSMUSG00000093935.1	0	0	0	0	0	0	0	0	0	0	0	0	0	0	0	0	0	0	0	0	0	0	0	0	0	0	0	0	0	0	0	0	0
ENSMUSG00000115245.1	0	0	0	0	0	0	0	0	0	0	0	0	0	0	0	0	0	0	0	0	0	0	0	0	0	0	0	0	0	0	0	0	0
ENSMUSG00000081993.1	0	0	0	0	0	0	0	0	0	0	0	0	0	0	0	0	0	0	0	0	0	0	0	0	0	0	0	0	0	0	0	0	0
ENSMUSG00000045917.17	64	259	259	65	16	30	733	113	110	173	113	111	68	35	75	155	120	127	98	76	51	53	219	164	204	174	135	70	75	59	35	27	46
ENSMUSG00000051007.15	40	79	21	4	15	0	169	41	39	37	68	19	19	9	20	62	61	87	53	30	29	12	75	48	70	35	7	0	4	19	18	6	13
ENSMUSG00000104521.1	0	0	0	0	0	0	0	0	0	0	0	0	0	0	0	0	0	0	0	0	0	0	0	0	0	0	0	0	0	0	0	0	0
ENSMUSG00000113791.1	0	0	0	0	0	0	0	0	0	0	0	0	0	0	0	0	0	0	0	0	0	0	0	0	0	0	0	0	0	0	0	0	0
ENSMUSG00000014856.12	104	138	140	20	36	51	587	157	101	120	166	73	90	32	34	178	70	86	119	88	75	23	155	131	148	105	36	71	55	39	14	16	70
ENSMUSG00000087279.10	0	0	0	0	0	0	0	0	0	0	0	0	0	0	0	0	0	0	0	0	0	0	0	0	0	0	0	0	0	0	0	0	0
ENSMUSG00000098518.1	0	0	0	0	0	0	0	0	0	0	0	0	0	0	0	0	0	0	0	0	0	0	0	0	0	0	0	0	0	0	0	0	0
ENSMUSG00000086576.1	0	0	0	0	0	0	0	0	0	0	0	0	0	0	0	0	0	0	0	0	0	0	0	0	0	0	0	0	0	0	0	0	0
ENSMUSG00000025746.11	17	0	0	0	0	0	9	1	0	6	0	3	7	2	0	2	0	0	0	0	7	0	5	7	20	0	0	0	0	0	0	0	0
ENSMUSG00000097180.5	3	66	2	0	18	0	28	10	9	5	32	11	2	0	2	8	14	2	39	3	28	0	18	7	32	2	3	7	5	0	0	6	4
ENSMUSG00000109104.1	0	0	0	0	0	0	0	0	0	0	0	0	0	0	0	0	0	0	0	0	0	0	0	0	0	0	0	0	0	0	0	0	0
ENSMUSG00000102138.1	0	0	0	0	0	0	0	0	0	0	0	0	0	0	0	0	0	0	0	0	0	0	0	0	0	0	0	0	0	0	0	0	0
ENSMUSG00000100201.1	0	2	0	0	0	0	3	0	1	0	2	0	0	0	0	0	0	0	11	0	0	0	0	1	0	1	0	0	0	0	0	0	0
ENSMUSG00000112626.1	0	0	0	0	0	0	0	0	0	0	0	0	0	0	0	0	0	0	0	0	0	0	0	0	0	0	0	0	0	0	0	0	0
ENSMUSG00000082256.1	0	0	0	0	0	0	0	0	0	0	0	0	0	0	0	0	0	0	0	0	0	0	0	0	0	0	0	0	0	0	0	0	0
ENSMUSG00000089222.1	0	0	0	0	0	0	0	0	0	0	0	0	0	0	0	0	0	0	0	0	0	0	0	0	0	0	0	0	0	0	0	0	0
ENSMUSG00000003534.17	0	7	0	0	14	1	56	5	1	2	4	0	0	3	3	19	0	0	2	2	2	5	10	7	24	14	6	0	2	1	3	3	3
ENSMUSG00000100684.1	0	0	0	0	0	0	0	0	0	0	0	0	0	0	0	0	0	0	0	0	0	0	0	0	0	0	0	0	0	0	0	0	0
ENSMUSG00000107650.1	0	0	0	0	0	0	0	0	0	0	0	0	0	0	0	0	0	0	0	0	0	0	0	0	0	0	0	0	0	0	0	0	0
ENSMUSG00000077280.1	0	0	0	0	0	0	0	0	0	0	0	0	0	0	0	0	0	0	0	0	0	0	0	0	0	0	0	0	0	0	0	0	0
ENSMUSG00000030393.8	10	67	13	0	0	17	11	6	0	3	38	1	0	0	1	11	5	0	10	0	3	0	2	9	11	1	1	7	1	2	0	0	6
ENSMUSG00000068877.12	69	0	0	0	0	0	3	0	0	1	0	0	0	0	0	0	0	0	0	0	0	0	0	0	0	0	0	0	0	0	0	0	0
ENSMUSG00000078618.3	0	0	0	0	0	0	0	0	0	0	1	0	0	0	0	0	0	0	0	0	0	0	0	0	0	0	0	0	0	0	0	0	0
ENSMUSG00000051900.12	0	0	0	0	0	0	0	0	0	0	0	0	0	0	0	0	0	0	0	0	0	0	0	0	0	0	0	0	0	0	0	0	0
ENSMUSG00000025314.16	878	1276	1032	136	109	290	1399	417	345	395	225	286	282	125	167	597	803	1226	1061	269	370	120	818	443	1268	315	252	293	171	234	244	201	245
ENSMUSG00000105267.1	0	0	0	0	0	0	0	0	0	0	0	0	0	0	0	0	0	0	0	0	0	0	0	0	0	0	0	0	0	0	0	0	0
ENSMUSG00000103330.1	0	0	0	0	0	0	0	0	0	0	0	0	0	0	0	0	0	0	0	0	0	0	0	0	0	0	0	0	0	0	0	0	0
ENSMUSG00000022435.5	0	0	0	0	0	0	0	0	0	0	0	0	0	0	0	0	0	0	0	0	0	0	0	0	0	0	0	0	0	0	0	0	0
ENSMUSG00000045464.5	20	90	36	0	0	0	60	13	18	12	42	21	10	0	3	20	25	43	34	4	21	0	17	13	59	10	4	3	1	2	19	7	8
ENSMUSG00000071532.6	5	4	11	1	1	1	33	8	3	4	3	4	3	1	1	6	11	4	14	7	23	1	1	3	3	2	2	2	1	2	1	3	1
ENSMUSG00000115755.1	0	0	0	0	0	0	0	0	0	0	0	0	0	0	0	0	0	0	0	0	0	0	0	0	0	0	0	0	0	0	0	0	0
ENSMUSG00000029401.8	79	189	137	35	40	30	1337	229	253	289	106	112	25	51	96	203	56	6	85	137	172	57	218	150	203	265	98	71	85	40	45	49	68
ENSMUSG00000086603.1	0	0	0	0	0	0	4	0	0	0	0	0	0	0	0	0	0	0	0	0	0	0	0	0	7	0	4	0	0	0	0	0	0
ENSMUSG00000074607.11	0	0	0	0	0	0	1	0	0	0	0	0	0	0	0	0	0	0	0	0	0	0	0	0	0	0	0	0	0	0	0	0	0
ENSMUSG00000095873.1	0	0	0	0	0	0	0	0	0	0	0	0	0	0	0	0	0	0	0	0	0	0	0	0	0	0	0	0	0	0	0	0	0
ENSMUSG00000097327.7	1	5	5	0	1	0	18	6	17	3	11	3	2	2	2	11	3	12	4	3	12	0	11	5	15	7	1	0	8	4	0	0	5
ENSMUSG00000085385.7	40	109	135	11	0	23	124	70	42	30	94	28	3	11	18	30	57	18	85	46	36	0	28	41	80	35	21	20	10	20	13	4	2
ENSMUSG00000111435.1	0	0	0	0	0	0	0	0	0	0	0	0	0	0	0	0	0	0	0	0	0	0	0	0	0	0	0	0	0	0	0	0	0
ENSMUSG00000108396.1	0	0	0	0	0	0	0	0	0	0	3	0	0	0	0	0	0	0	0	0	0	0	0	0	0	0	0	0	0	0	0	0	0
ENSMUSG00000017802.14	541	1172	1202	202	278	484	1321	355	297	230	448	197	192	49	114	785	711	603	726	674	696	197	559	362	929	380	275	362	274	392	852	493	611
ENSMUSG00000003585.13	368	0	0	1	7	1	6	0	3	2	0	2	0	0	0	4	0	0	0	4	2	0	0	5	20	3	1	0	5	0	0	12	1
ENSMUSG00000100711.1	0	0	0	0	0	0	0	0	0	0	18	0	0	0	0	0	0	0	0	0	0	0	0	0	0	0	0	0	0	0	0	0	0
ENSMUSG00000079244.3	0	0	0	0	0	0	0	0	0	0	0	0	0	0	0	0	0	0	0	0	0	0	0	0	0	0	0	0	0	0	0	0	0
ENSMUSG00000094708.1	0	0	0	0	0	0	0	0	0	0	0	0	0	0	0	1	0	0	0	0	0	0	0	0	0	0	0	0	0	0	0	0	0
ENSMUSG00000032656.14	470	1505	757	91	431	612	157	24	6	8	48	16	42	6	2	476	488	1003	460	721	609	8	15	5	340	32	57	735	370	469	1256	847	955
ENSMUSG00000082766.1	10	18	6	1	5	11	2	0	0	0	0	0	0	0	1	3	2	0	0	13	4	0	0	0	0	0	0	0	0	4	7	1	3
ENSMUSG00000003153.10	1500	2504	1862	288	100	319	3475	765	718	375	388	810	483	401	423	1167	1344	1955	2148	370	141	367	1269	209	3275	691	746	268	227	484	180	136	145
ENSMUSG00000104076.1	0	0	0	0	0	0	0	0	0	0	0	0	0	0	0	0	0	0	0	0	0	0	0	0	0	0	0	0	0	0	0	0	0
ENSMUSG00000114564.1	0	0	0	0	0	0	0	0	0	0	0	0	0	0	0	0	0	0	0	0	0	0	0	0	0	0	0	0	0	0	0	0	0
ENSMUSG00000089732.5	0	0	0	0	0	0	0	0	0	0	0	0	0	0	0	0	0	0	0	0	0	0	0	0	0	0	0	0	0	0	0	0	0
ENSMUSG00000033669.7	26	126	175	14	0	3	252	44	23	32	113	39	19	6	18	59	93	32	108	40	35	7	56	41	74	42	23	19	22	19	18	17	18
ENSMUSG00000103840.1	0	0	0	0	0	0	0	0	0	0	0	0	0	0	0	0	0	0	0	0	0	0	0	0	0	0	0	0	0	0	0	0	0
ENSMUSG00000097837.1	0	0	0	0	0	0	0	0	0	0	0	0	0	0	0	0	0	0	0	0	0	0	0	0	0	0	0	0	0	0	0	0	0
ENSMUSG00000085895.1	0	0	0	0	0	0	0	0	0	0	0	0	0	0	0	0	0	0	0	0	0	0	0	0	0	0	0	0	0	0	0	0	0
ENSMUSG00000112061.1	0	0	0	0	0	0	0	0	0	0	0	0	0	0	0	0	0	0	0	0	0	0	0	0	0	0	0	0	0	0	0	0	0
ENSMUSG00000095900.2	0	0	0	0	0	0	0	0	0	0	0	0	0	0	0	0	0	0	0	0	0	0	0	0	0	0	0	0	0	0	0	0	0
ENSMUSG00000038132.6	0	0	0	0	0	0	0	0	0	0	10	1	0	0	0	0	0	0	0	0	0	0	0	0	0	0	0	0	0	0	0	0	0
ENSMUSG00000083029.1	0	0	0	0	0	0	0	0	0	0	0	0	0	0	0	0	0	0	0	0	0	0	0	0	0	0	0	0	0	0	0	0	0
ENSMUSG00000085412.7	0	0	0	0	0	0	1	0	0	0	0	0	0	0	0	0	0	0	3	0	0	0	0	0	0	0	0	0	0	0	0	0	0
ENSMUSG00000108423.1	0	0	0	0	0	0	0	0	0	0	0	0	0	0	0	0	0	0	0	0	0	0	0	0	0	0	0	0	0	0	0	0	0
ENSMUSG00000101457.1	0	0	0	0	0	0	0	0	0	0	0	0	0	0	0	0	0	0	0	0	0	0	0	0	0	0	0	0	0	0	0	0	0
ENSMUSG00000057890.5	0	0	0	0	0	0	0	0	0	0	0	0	0	0	0	0	0	0	0	0	0	0	0	0	0	0	0	0	0	0	0	0	0
ENSMUSG00000048620.6	0	0	0	0	0	0	0	0	0	0	0	0	0	0	0	0	0	0	0	0	0	0	0	0	0	0	0	0	0	0	0	0	0
ENSMUSG00000111945.1	0	0	0	0	0	0	0	0	0	0	0	0	0	0	0	0	0	0	0	0	0	0	0	0	0	0	0	0	0	0	0	0	0
ENSMUSG00000088541.1	0	0	0	0	0	0	0	0	0	0	0	0	0	0	0	0	0	0	0	0	0	0	0	0	0	0	0	0	0	0	0	0	0
ENSMUSG00000081575.1	0	0	0	0	0	0	0	0	0	0	0	0	0	0	0	0	1	0	0	0	0	0	0	0	0	0	0	0	0	0	0	0	0
ENSMUSG00000061778.10	51	196	411	15	19	11	250	65	10	103	83	37	1	14	29	88	192	58	68	48	125	17	136	107	242	48	46	70	56	96	139	99	67
ENSMUSG00000052446.17	74	444	357	8	35	19	222	64	15	47	124	38	32	17	27	76	146	108	218	85	77	1	61	83	189	21	24	32	19	20	11	18	26
ENSMUSG00000021385.10	96	57	119	6	0	4	236	49	40	50	43	23	0	9	17	47	30	16	59	39	15	8	45	48	77	30	35	1	28	10	18	14	5
ENSMUSG00000104103.1	0	0	0	0	0	0	1	0	0	0	0	0	0	0	0	0	0	0	0	0	0	0	0	0	1	0	0	0	0	0	0	0	0
ENSMUSG00000115190.1	0	0	0	0	0	0	0	0	0	0	0	0	0	0	0	0	0	0	0	0	0	0	0	0	0	0	0	0	0	0	0	0	0
ENSMUSG00000091014.2	0	0	0	0	0	0	0	0	0	0	0	0	0	0	0	0	0	0	0	0	0	0	0	0	0	0	0	0	0	0	0	0	0
ENSMUSG00000086158.2	19	46	63	4	0	6	44	7	39	8	17	6	17	2	2	12	7	0	38	22	7	1	34	8	24	10	6	21	7	7	13	6	3
ENSMUSG00000104586.1	0	0	0	0	0	0	0	0	0	0	0	0	0	0	0	0	0	0	0	0	0	0	0	0	0	0	0	0	0	0	0	0	0
ENSMUSG00000034295.9	0	0	0	0	0	0	2	0	0	0	0	0	0	0	0	0	0	0	0	0	1	0	0	0	0	0	6	0	0	0	0	0	0
ENSMUSG00000017421.18	385	1924	1592	208	197	347	2607	716	363	527	933	428	177	123	235	791	778	677	958	740	627	155	681	593	1376	437	416	439	346	541	449	229	346
ENSMUSG00000112208.1	0	0	0	0	0	0	0	0	0	0	0	0	0	0	0	0	0	0	0	0	0	0	0	0	0	0	0	0	0	0	0	0	0
ENSMUSG00000109169.1	0	0	0	0	0	0	0	0	0	0	0	0	0	0	0	0	0	0	0	0	0	0	0	0	0	0	0	0	0	0	0	0	0
ENSMUSG00000085922.1	0	0	0	0	0	0	0	0	0	0	0	0	0	0	0	0	0	0	0	0	0	0	0	0	0	0	0	0	0	0	0	0	0
ENSMUSG00000107232.1	0	0	0	0	0	0	0	0	0	0	0	0	0	0	0	0	0	0	0	0	0	0	0	0	0	0	0	0	0	0	0	0	0
ENSMUSG00000100266.2	0	0	0	0	0	0	0	0	0	0	0	0	0	0	0	0	0	0	0	0	0	0	0	0	0	0	0	0	0	0	0	0	0
ENSMUSG00000089287.1	0	0	0	0	0	0	0	0	0	0	0	0	0	0	0	0	0	0	0	0	0	0	0	0	0	0	0	0	0	0	0	0	0
ENSMUSG00000037643.14	22	213	64	1	0	0	66	33	23	25	77	15	22	9	4	40	53	5	52	39	48	8	50	50	75	23	10	14	15	52	32	13	19
ENSMUSG00000068075.2	0	0	0	0	0	0	0	0	0	0	0	0	0	0	0	0	0	0	0	0	0	0	0	0	0	0	0	0	0	0	0	0	0
ENSMUSG00000110754.1	0	0	0	0	0	0	0	0	0	0	0	0	0	0	0	0	0	0	0	0	0	0	0	0	0	0	0	0	0	0	0	0	0
ENSMUSG00000083539.1	1	0	3	2	0	0	6	1	1	1	1	1	0	1	0	1	4	0	1	1	1	2	1	3	0	0	1	1	3	1	0	1	0
ENSMUSG00000073980.5	0	0	0	0	0	0	0	0	0	0	0	0	0	0	0	0	0	0	0	0	0	0	0	0	0	0	0	0	0	0	0	0	0
ENSMUSG00000081602.1	0	0	0	0	0	0	0	0	0	0	0	0	0	0	0	0	0	0	0	0	0	0	0	0	0	0	0	0	0	0	0	0	0
ENSMUSG00000099775.1	4	0	0	0	1	0	492	196	82	96	74	101	91	1	3	16	22	0	20	5	0	7	47	36	54	9	11	0	0	6	2	0	0
ENSMUSG00000059854.8	0	0	0	0	0	0	0	0	0	1	0	0	0	0	0	0	0	0	0	0	0	0	0	0	2	0	0	0	0	0	0	0	0
ENSMUSG00000024883.7	0	0	0	5	0	0	7	1	1	0	11	0	0	1	0	4	0	0	5	0	4	0	1	14	4	0	1	0	5	0	0	0	0
ENSMUSG00000037211.12	6	0	25	1	0	0	13	0	0	3	2	2	0	0	0	4	4	0	0	0	3	0	6	7	27	0	2	0	0	0	2	0	0
ENSMUSG00000115337.1	0	0	0	0	0	0	0	0	0	0	0	0	0	0	2	0	0	0	0	0	0	0	0	0	0	0	0	0	0	0	0	0	0
ENSMUSG00000059423.13	61	147	107	2	0	0	98	55	8	16	42	25	9	5	7	17	113	16	54	28	8	0	50	39	75	9	21	20	13	24	23	3	13
ENSMUSG00000103395.1	0	0	0	0	0	0	0	0	0	0	0	0	0	0	0	0	0	0	0	0	0	0	0	0	0	0	0	0	0	0	0	0	0
ENSMUSG00000032988.3	0	0	0	0	0	0	0	0	0	0	0	0	0	0	0	0	0	0	0	0	0	0	0	0	0	0	0	0	0	0	0	0	0
ENSMUSG00000008140.17	5	19	34	15	11	16	113	22	13	18	58	17	3	5	10	46	10	10	14	19	12	8	40	19	28	35	11	15	10	3	9	4	10
ENSMUSG00000097272.1	0	0	0	0	0	0	0	0	0	0	0	0	0	0	0	0	0	0	0	0	0	0	0	0	0	0	0	0	0	0	0	0	0
ENSMUSG00000104613.1	0	0	0	0	0	0	0	0	0	0	0	0	0	0	0	0	0	0	0	0	0	0	0	0	0	0	0	0	0	0	0	0	0
ENSMUSG00000113883.1	0	0	0	0	0	0	0	0	0	0	3	0	0	0	0	0	0	0	2	0	0	0	0	1	0	0	0	0	0	0	0	0	0
ENSMUSG00000086668.1	0	0	0	0	0	0	0	0	0	0	0	0	0	0	0	0	0	0	0	0	0	0	0	0	0	0	0	0	0	0	0	0	0
ENSMUSG00000035653.16	0	0	0	0	0	0	0	0	0	0	0	0	0	0	0	0	0	0	0	0	0	0	0	0	0	0	0	0	0	0	0	0	0
ENSMUSG00000084731.1	0	0	0	0	0	0	0	0	0	0	0	0	0	0	0	0	0	0	0	0	0	0	0	0	0	0	0	0	0	0	0	0	0
ENSMUSG00000074243.4	0	0	0	0	0	0	1	0	0	0	0	0	0	0	0	0	0	1	0	0	0	0	1	0	0	0	0	0	0	0	0	0	0
ENSMUSG00000041815.13	59	166	131	18	44	74	607	163	125	71	174	82	37	22	37	150	71	130	130	95	72	73	172	107	197	129	76	58	59	57	16	12	38
ENSMUSG00000039954.8	0	0	0	0	0	0	0	0	0	0	0	0	0	0	0	0	0	0	0	0	0	0	0	1	0	0	0	0	0	0	0	0	0
ENSMUSG00000111380.1	0	0	0	0	0	0	2	0	1	0	0	0	0	0	0	0	0	0	0	0	0	0	0	0	2	1	0	0	0	0	0	0	0
ENSMUSG00000112718.1	0	0	0	0	0	0	0	0	0	0	0	0	0	0	0	0	0	0	0	0	0	0	0	0	0	0	0	0	0	0	0	0	0
ENSMUSG00000068323.12	0	0	0	0	0	0	1	0	0	0	0	0	0	0	0	0	0	0	0	0	2	0	0	0	0	0	0	0	0	0	0	0	0
ENSMUSG00000082348.1	0	0	0	0	0	0	0	0	0	0	0	0	0	0	0	0	0	0	0	0	0	0	0	0	0	0	0	0	0	0	0	0	0
ENSMUSG00000089314.1	0	0	0	0	0	0	0	0	0	0	0	0	0	0	0	0	0	0	0	0	0	0	0	0	0	0	0	0	0	0	0	0	0
ENSMUSG00000100776.1	0	0	0	0	0	0	0	0	0	0	0	0	0	0	0	0	0	0	0	0	0	0	0	0	0	0	0	0	0	0	0	0	0
ENSMUSG00000024910.4	57	288	347	28	14	65	1330	380	189	160	190	166	72	58	129	297	123	208	239	200	96	66	202	223	129	251	108	79	150	55	36	24	22
ENSMUSG00000107742.1	0	9	3	1	0	0	7	1	1	2	3	2	0	0	2	1	0	0	0	10	4	0	0	3	24	1	0	0	0	0	0	0	6
ENSMUSG00000089797.1	0	0	0	0	0	0	0	0	0	1	0	0	0	0	0	0	0	0	0	0	0	0	0	0	0	0	0	0	0	0	0	0	0
ENSMUSG00000099802.1	0	0	0	0	0	0	0	0	0	0	0	0	0	0	0	0	0	0	0	0	0	0	0	0	0	0	0	0	0	0	0	0	0
ENSMUSG00000080894.1	0	0	0	0	0	0	0	0	0	0	0	0	0	0	0	0	0	0	0	0	0	0	0	0	0	0	0	0	0	0	0	0	0
ENSMUSG00000087860.1	0	0	0	0	0	0	0	0	0	0	0	0	0	0	0	0	0	0	0	0	0	0	0	0	0	0	0	0	0	0	0	0	0
ENSMUSG00000105359.1	0	1	0	0	0	0	1	0	0	1	1	0	0	1	0	0	3	3	0	0	1	0	0	1	0	0	1	1	1	1	0	4	1
ENSMUSG00000103422.1	0	0	0	0	0	0	0	0	0	0	0	0	0	0	0	0	0	0	0	0	0	0	0	0	0	0	0	0	0	0	0	0	0
ENSMUSG00000096081.1	0	0	0	0	0	0	0	0	0	0	0	0	0	0	0	0	0	0	0	0	0	0	0	0	0	0	0	0	0	0	0	0	0
ENSMUSG00000097419.1	0	0	0	0	0	0	0	0	0	0	0	0	0	0	0	0	0	0	0	0	0	0	0	0	0	0	0	0	0	0	0	0	0
ENSMUSG00000115847.1	0	0	0	0	0	0	0	0	0	0	0	0	0	0	0	0	0	0	0	0	0	0	0	0	0	0	0	0	0	0	0	0	0
ENSMUSG00000090333.1	0	0	0	0	0	0	0	0	0	0	0	0	0	0	0	0	0	0	0	0	0	0	0	0	0	0	0	0	0	0	0	0	0
ENSMUSG00000113910.1	0	0	0	0	0	0	0	0	0	0	0	0	0	0	0	0	0	0	0	0	0	0	0	0	0	0	0	0	0	0	0	0	0
ENSMUSG00000101039.1	0	0	0	0	0	0	0	0	0	0	0	0	0	0	0	0	0	0	0	0	0	0	0	0	0	0	0	0	0	0	0	0	0
ENSMUSG00000095965.1	0	0	0	0	0	0	0	0	0	0	0	0	0	0	0	0	0	0	0	0	0	0	0	0	0	0	0	0	0	0	0	0	0
ENSMUSG00000108005.1	0	0	0	0	0	0	0	0	0	0	0	0	0	0	0	0	0	0	0	0	0	0	0	0	0	0	0	0	0	0	0	0	0
ENSMUSG00000085477.7	0	0	0	0	0	0	0	0	0	0	0	0	0	0	0	0	0	0	0	0	0	0	0	0	0	0	0	0	0	0	0	0	0
ENSMUSG00000033029.12	0	0	0	0	0	4	4	1	0	1	2	0	0	0	0	4	0	0	0	4	5	0	0	0	0	0	0	0	0	3	0	0	1
ENSMUSG00000024382.13	53	211	378	27	26	58	541	90	64	88	152	77	19	29	60	140	118	96	151	107	79	29	144	98	107	83	67	33	49	42	38	61	51
ENSMUSG00000108488.1	0	0	0	0	0	0	0	0	0	0	0	0	0	0	0	0	0	0	0	0	0	0	0	0	0	0	0	0	0	0	0	0	0
ENSMUSG00000020024.7	83	355	451	7	72	91	479	102	57	124	265	63	17	16	26	110	206	63	157	134	82	20	177	121	291	54	50	64	28	42	147	41	37
ENSMUSG00000106551.1	0	0	0	0	0	0	0	0	0	0	0	0	0	0	0	0	0	0	0	0	0	0	0	0	0	0	0	0	0	0	0	0	0
ENSMUSG00000041236.8	183	857	901	46	62	109	1060	220	118	226	377	126	106	52	69	285	405	411	378	285	318	48	320	288	606	160	130	144	124	181	147	116	161
ENSMUSG00000074753.5	0	0	0	0	0	0	0	0	0	0	0	0	0	0	0	0	0	0	0	0	0	0	0	0	0	0	0	0	0	0	0	0	0
ENSMUSG00000022139.17	895	1267	1713	110	99	269	696	365	276	335	471	164	219	94	126	313	714	647	935	288	383	30	494	322	1537	119	153	169	87	320	318	159	264
ENSMUSG00000100803.1	0	0	0	0	0	0	0	0	0	0	0	0	0	0	0	0	0	0	0	0	0	0	0	0	0	0	0	0	0	0	0	0	0
ENSMUSG00000082858.1	0	0	0	0	0	0	0	0	0	0	0	0	0	0	0	0	0	0	0	0	0	0	0	0	0	0	0	0	0	0	0	0	0
ENSMUSG00000104168.1	0	0	0	0	0	0	10	4	0	1	1	1	5	1	0	1	3	0	0	0	3	0	1	0	0	0	0	0	0	0	0	0	0
ENSMUSG00000098045.1	0	0	0	0	0	0	0	0	0	0	0	0	0	0	0	0	0	0	0	0	0	0	0	0	0	0	0	0	0	0	0	0	0
ENSMUSG00000091079.1	0	0	0	0	0	0	0	0	0	0	0	0	0	0	0	0	0	0	0	0	0	0	0	0	0	0	0	0	0	0	0	0	0
ENSMUSG00000114656.1	0	0	0	0	0	0	3	0	0	2	3	0	0	0	0	1	12	0	0	0	0	6	0	1	2	0	0	0	0	0	0	0	0
ENSMUSG00000080921.4	100	575	45	94	143	152	805	232	119	156	113	117	153	47	70	396	135	352	265	206	276	26	253	161	399	151	42	131	88	70	275	137	156
ENSMUSG00000025949.16	206	1180	415	19	19	65	317	113	23	102	170	56	86	23	37	172	313	105	409	158	129	44	149	136	250	96	81	61	62	117	108	74	110
ENSMUSG00000109680.1	0	0	0	0	0	0	0	0	0	0	0	0	0	0	0	0	0	0	0	0	1	0	0	0	0	0	0	0	0	0	0	0	0
ENSMUSG00000085504.1	0	0	0	0	0	0	0	0	0	0	0	0	0	0	0	0	0	0	0	0	0	0	0	0	0	0	0	0	0	0	0	0	0
ENSMUSG00000103932.1	0	0	0	0	0	0	0	0	0	0	0	0	0	0	0	0	0	0	0	0	0	0	0	1	0	0	0	0	0	0	0	0	0
ENSMUSG00000096591.1	0	0	0	0	0	0	0	0	0	0	0	0	0	0	0	0	0	0	0	0	0	0	0	0	0	0	0	0	0	0	0	0	0
ENSMUSG00000031258.4	39	97	102	1	0	11	15	9	1	2	49	14	3	1	1	16	78	23	57	16	23	0	9	12	41	6	9	5	3	2	0	0	7
ENSMUSG00000112153.1	0	0	0	0	0	0	0	0	0	0	0	0	0	0	0	0	0	0	0	0	0	0	0	0	0	0	0	0	0	0	0	0	0
ENSMUSG00000085987.2	0	0	0	0	0	0	0	0	0	0	0	0	0	0	0	0	0	0	0	0	0	0	0	0	0	0	0	0	0	0	0	0	0
ENSMUSG00000050334.12	0	0	0	0	0	0	0	0	0	0	0	0	0	0	0	0	0	0	0	0	0	0	0	0	0	0	0	0	0	0	0	0	0
ENSMUSG00000108515.1	0	0	0	0	0	0	0	0	0	0	0	0	0	0	0	0	0	0	0	0	0	0	0	0	0	0	0	0	0	0	0	0	0
ENSMUSG00000083001.1	0	0	0	0	0	0	0	0	0	0	0	0	0	0	0	0	0	0	0	0	0	0	0	0	0	0	0	0	0	0	0	0	0
ENSMUSG00000101549.1	0	0	0	0	0	0	0	0	0	0	0	0	0	0	0	0	0	0	0	0	0	0	0	0	0	0	0	0	0	0	0	0	0
ENSMUSG00000092271.1	0	0	0	0	0	0	0	0	0	0	0	0	0	0	0	0	0	0	0	0	0	0	0	0	0	0	0	0	0	0	0	0	0
ENSMUSG00000038650.15	287	653	589	317	158	367	4343	799	478	932	294	390	221	130	301	962	358	524	388	443	553	224	1140	602	918	753	321	360	246	294	237	140	242
ENSMUSG00000029048.3	614	1222	1535	68	100	171	2421	617	310	482	614	366	172	114	229	577	610	607	619	438	373	187	599	619	1098	421	341	335	196	272	188	181	201
ENSMUSG00000088633.1	0	0	0	0	0	0	0	0	0	0	0	0	0	0	0	0	0	0	0	0	0	0	0	0	0	0	0	0	0	0	0	0	0
ENSMUSG00000081667.1	0	0	0	0	0	0	0	0	0	0	0	0	0	0	0	0	0	0	0	0	0	0	0	0	0	0	0	0	0	0	0	0	0
ENSMUSG00000097929.9	0	0	0	0	0	0	0	0	0	0	0	0	0	0	0	0	0	0	0	0	0	0	0	0	0	0	0	0	0	0	0	0	0
ENSMUSG00000057982.8	105	63	410	2	17	0	271	94	52	44	108	37	21	14	27	69	113	115	91	45	50	14	71	85	84	55	64	10	26	36	43	10	41
ENSMUSG00000115282.1	0	0	0	0	0	0	0	0	0	0	0	0	0	0	0	0	0	0	0	0	0	0	0	0	0	0	0	0	0	0	0	0	0
ENSMUSG00000055116.8	43	253	215	13	23	34	172	32	14	60	267	23	10	8	19	73	109	29	56	81	66	23	41	47	76	33	24	27	17	33	43	35	17
ENSMUSG00000071179.8	0	0	0	0	0	0	0	0	0	0	0	0	0	0	0	0	0	0	0	0	0	0	0	0	0	0	0	0	0	0	0	0	0
ENSMUSG00000075284.10	702	985	1985	101	56	219	1769	531	493	263	487	305	275	77	180	418	592	852	812	493	401	71	533	432	1204	260	271	174	204	236	210	139	210
ENSMUSG00000070943.3	0	0	0	0	0	0	0	0	0	0	0	0	0	0	0	0	0	0	0	0	0	0	0	0	0	0	0	0	0	0	0	0	0
ENSMUSG00000104678.1	0	0	0	0	0	0	0	0	0	0	0	0	0	0	0	0	0	0	0	0	0	0	0	0	0	0	0	0	0	0	0	0	0
ENSMUSG00000056629.15	75	36	30	10	41	1	247	95	52	38	81	49	19	7	22	46	15	16	31	28	27	5	88	68	65	49	12	36	13	22	5	3	13
ENSMUSG00000086130.1	0	0	0	0	0	0	6	0	2	0	0	0	0	0	0	1	0	0	18	0	0	0	0	0	0	0	0	0	0	0	0	0	0
ENSMUSG00000102741.1	0	0	0	0	0	0	0	0	0	0	0	0	0	0	0	0	0	0	0	0	0	0	0	0	0	0	0	0	0	0	0	0	0
ENSMUSG00000051279.2	0	0	0	0	0	0	0	0	0	0	0	0	0	0	0	0	0	0	0	0	0	0	0	0	0	0	0	0	0	0	0	0	0
ENSMUSG00000031932.14	7	37	18	2	0	4	64	17	7	6	30	8	9	3	11	11	10	0	13	18	7	1	15	22	58	14	32	1	15	2	0	0	4
ENSMUSG00000096738.1	0	0	0	0	0	0	0	0	0	0	0	0	0	0	0	0	0	0	0	0	0	0	0	0	0	0	0	0	0	0	0	0	0
ENSMUSG00000025091.3	0	0	0	0	0	0	0	0	0	0	0	0	0	0	0	0	0	0	0	0	0	0	0	0	0	0	0	0	0	0	0	0	0
ENSMUSG00000084796.1	13	213	35	13	24	17	368	85	86	62	558	63	45	8	22	146	138	76	145	51	66	11	197	79	127	89	33	63	54	28	33	39	42
ENSMUSG00000021846.9	27	0	0	0	3	0	42	5	0	24	11	3	2	1	10	4	5	0	4	1	2	6	13	13	14	1	5	0	0	0	7	0	4
ENSMUSG00000100358.1	0	0	0	0	0	0	0	0	0	0	0	0	0	0	0	0	0	0	0	0	0	0	0	0	0	0	0	0	0	0	0	0	0
ENSMUSG00000058440.14	163	383	236	58	42	217	608	152	122	110	285	79	53	31	54	157	188	153	275	179	191	60	175	94	265	121	58	100	49	85	60	84	42
ENSMUSG00000094235.1	0	0	0	0	0	0	0	0	0	0	0	0	0	0	0	0	0	0	0	0	0	0	0	0	0	0	0	0	0	0	0	0	0
ENSMUSG00000037033.9	0	0	0	0	0	0	0	0	0	0	0	0	0	0	0	0	0	0	0	0	0	0	0	0	0	0	0	0	0	0	0	0	0
ENSMUSG00000110846.1	0	0	0	0	0	0	0	0	0	0	0	0	0	0	0	0	0	0	0	0	0	0	0	0	0	0	0	0	0	0	0	0	0
ENSMUSG00000087442.1	0	0	0	0	0	0	0	0	0	0	0	0	0	0	0	0	0	0	0	0	0	0	0	0	0	0	0	0	0	0	0	0	0
ENSMUSG00000035699.7	0	0	0	0	0	0	0	0	0	0	0	0	0	0	0	0	0	0	0	0	0	0	0	0	0	0	0	0	0	0	0	0	0
ENSMUSG00000026429.9	10	13	67	2	8	3	152	30	22	14	86	24	1	6	11	20	4	7	18	10	10	8	17	23	9	7	10	2	0	1	0	0	2
ENSMUSG00000105870.1	0	0	0	0	0	0	0	0	0	0	0	0	0	0	0	0	0	0	0	0	0	0	1	0	0	0	0	0	0	0	0	0	0
ENSMUSG00000078655.1	0	0	0	0	0	0	0	0	0	0	0	0	0	0	0	0	0	0	0	0	0	0	0	0	0	0	0	0	0	0	0	0	0
ENSMUSG00000099867.1	0	0	0	0	0	0	0	0	0	0	0	0	0	0	0	0	0	0	0	0	0	0	0	0	0	0	0	0	0	0	0	0	0
ENSMUSG00000092781.1	0	0	0	0	0	0	0	0	0	0	0	0	0	0	0	0	0	0	0	0	0	0	0	0	0	0	0	0	0	0	0	0	0
ENSMUSG00000114091.1	0	0	0	0	0	0	0	0	0	0	0	0	0	0	0	0	0	0	0	0	0	0	0	0	0	0	0	0	0	0	0	0	0
ENSMUSG00000022109.6	113	439	245	11	26	21	461	112	62	107	145	48	56	28	33	113	152	88	137	82	69	10	104	96	199	99	60	59	32	34	36	21	28
ENSMUSG00000115429.1	0	0	0	0	0	0	0	0	0	0	0	0	0	0	0	0	0	0	0	0	0	0	0	0	0	0	0	0	0	0	0	0	0
ENSMUSG00000103487.1	0	0	0	0	0	0	0	0	0	0	0	0	0	0	0	0	0	0	0	0	0	0	0	0	0	0	0	0	0	0	0	0	0
ENSMUSG00000097364.1	0	0	0	0	0	0	0	0	0	0	0	0	0	0	0	0	0	0	0	0	0	0	0	0	0	0	0	0	0	0	0	0	0
ENSMUSG00000104705.1	0	0	0	0	0	0	0	0	0	0	0	0	0	0	0	0	0	0	0	0	0	0	0	0	0	0	0	0	0	0	0	0	0
ENSMUSG00000036026.15	48	109	17	5	16	11	62	10	10	15	60	17	0	2	3	33	12	1	16	8	15	3	49	23	35	23	6	18	21	6	13	11	5
ENSMUSG00000113975.1	0	0	0	0	0	0	12	0	0	1	0	0	0	0	0	0	0	0	0	0	0	0	0	0	0	0	0	0	0	0	0	0	0
ENSMUSG00000084823.2	0	0	0	0	0	0	0	0	0	0	0	0	0	0	0	0	0	0	0	0	0	0	0	0	0	0	0	0	0	0	0	0	0
ENSMUSG00000058755.3	10	2	3	22	0	14	149	30	24	28	23	77	20	11	21	38	50	22	19	6	25	3	37	11	43	77	42	36	3	1	7	7	23
ENSMUSG00000063611.4	0	1	0	0	0	0	1	1	0	5	3	0	0	0	0	1	0	0	0	0	1	0	1	3	0	0	0	0	0	0	0	0	0
ENSMUSG00000051306.7	66	263	112	0	1	24	113	36	20	22	81	28	29	8	11	50	47	63	51	45	30	9	53	30	51	43	23	41	25	11	24	1	20
ENSMUSG00000093044.1	0	0	0	0	0	0	0	0	0	0	1	0	0	0	0	1	0	0	0	0	0	0	0	0	0	0	0	0	0	0	0	0	0
ENSMUSG00000088188.1	0	0	0	0	0	0	0	0	0	0	0	0	0	0	0	0	0	0	0	0	0	0	0	0	0	0	0	0	0	0	0	0	0
ENSMUSG00000111472.1	0	0	0	0	0	0	0	0	0	0	0	0	0	0	0	0	0	0	0	0	0	0	0	0	0	0	0	0	0	0	0	0	0
ENSMUSG00000031551.12	6	0	0	0	0	0	36	3	21	5	1	12	0	1	0	4	0	0	0	6	1	0	1	8	0	10	3	0	0	0	0	0	0
ENSMUSG00000020661.15	89	201	235	48	19	56	313	77	66	35	301	50	53	13	35	134	143	109	125	74	50	20	139	73	130	91	46	20	63	32	42	35	28
ENSMUSG00000089406.1	0	0	0	0	0	0	0	0	0	0	0	0	0	0	0	0	0	0	0	0	0	0	0	0	0	0	0	0	0	0	0	0	0
ENSMUSG00000100868.1	0	0	0	0	0	0	0	0	0	0	0	0	0	0	0	0	0	0	0	0	0	0	0	0	0	0	0	0	0	0	0	0	0
ENSMUSG00000098676.1	0	0	0	0	0	0	0	0	0	0	0	0	0	0	0	0	0	0	0	0	0	0	0	0	0	0	0	0	0	0	0	0	0
ENSMUSG00000107834.1	0	0	0	0	0	0	0	0	0	0	0	0	0	0	0	0	0	0	0	0	0	0	0	0	0	0	0	0	0	0	0	0	0
ENSMUSG00000082320.1	0	0	0	0	0	0	0	0	0	0	0	0	0	0	0	0	0	0	0	0	0	0	0	0	0	0	0	0	0	0	0	0	0
ENSMUSG00000077464.1	0	0	0	0	0	0	0	0	0	0	0	0	0	0	0	0	0	0	0	0	0	0	0	0	0	0	0	0	0	0	0	0	0
ENSMUSG00000035726.8	270	1127	1098	69	116	205	2334	549	350	249	806	284	153	64	137	412	388	647	646	392	321	193	432	437	587	325	192	190	169	318	155	124	112
ENSMUSG00000092928.1	0	0	0	0	0	0	0	0	0	0	0	0	0	0	0	0	0	0	0	0	0	0	0	0	0	0	0	0	0	0	0	0	0
ENSMUSG00000028514.15	232	742	854	23	27	50	503	188	85	97	312	132	88	26	41	201	274	164	360	191	192	61	178	206	244	139	93	99	57	70	123	67	79
ENSMUSG00000070498.3	0	0	0	0	0	0	2	0	0	0	0	0	0	0	0	0	3	0	0	4	0	0	6	0	2	0	0	0	0	0	0	0	0
ENSMUSG00000064923.1	0	0	0	0	0	0	0	0	0	0	0	0	0	0	0	0	0	0	0	0	0	0	0	0	0	0	0	0	0	0	0	0	0
ENSMUSG00000080986.1	0	0	0	0	0	0	0	0	0	0	0	0	0	0	0	0	0	0	0	0	0	0	0	0	0	0	0	0	0	0	0	0	0
ENSMUSG00000089889.2	27	11	12	0	1	0	34	1	0	4	12	1	0	1	6	9	33	0	0	2	7	0	2	3	1	3	4	5	1	2	0	6	1
ENSMUSG00000028367.5	648	718	766	284	284	741	4393	1462	1131	777	898	924	496	108	334	638	433	542	414	485	703	71	787	625	1229	491	373	387	398	455	703	358	348
ENSMUSG00000026956.15	28	67	74	5	4	29	367	65	52	104	66	39	21	16	36	109	59	78	68	53	40	35	131	85	105	69	26	13	27	21	17	32	19
ENSMUSG00000071716.4	57	123	71	4	1	26	201	38	19	8	34	39	27	8	23	47	68	34	32	27	25	6	56	31	42	47	16	0	11	10	0	0	11
ENSMUSG00000103514.1	0	0	0	0	0	0	0	0	0	0	0	0	0	0	0	0	0	0	0	0	0	0	0	0	0	0	0	0	0	0	0	0	0
ENSMUSG00000022619.5	0	0	0	0	0	0	0	0	0	0	0	0	0	0	0	0	0	0	0	0	0	0	0	0	0	0	0	0	0	0	0	0	0
ENSMUSG00000096173.2	1	0	1	0	2	5	3	0	3	0	0	0	1	0	1	0	0	3	0	0	2	0	1	1	1	2	0	2	0	0	0	0	2
ENSMUSG00000085569.1	27	0	51	0	0	0	0	0	0	0	0	0	0	0	0	0	0	0	0	0	0	0	0	0	1	0	0	0	0	0	0	0	0
ENSMUSG00000083632.1	0	0	0	0	0	0	0	0	0	0	0	0	0	0	0	0	0	0	0	0	0	0	0	0	0	0	0	0	0	0	0	0	0
ENSMUSG00000052981.6	0	0	0	0	0	0	0	2	0	0	1	0	0	0	0	0	0	0	0	0	0	0	2	5	0	0	0	0	0	0	0	0	0
ENSMUSG00000040883.16	451	16	1	0	34	3	52	19	19	34	7	9	8	3	10	24	3	9	3	8	17	5	45	33	46	13	4	16	1	8	2	0	0
ENSMUSG00000073144.4	0	0	0	0	0	0	50	9	7	2	7	12	38	0	0	3	0	0	21	11	21	0	6	0	18	2	1	1	7	0	33	23	3
ENSMUSG00000103997.1	0	0	0	0	0	0	0	0	0	0	0	0	0	0	0	0	0	0	0	0	0	0	0	0	0	0	0	0	0	0	0	0	0
ENSMUSG00000075111.11	0	0	0	0	0	0	0	0	0	0	0	0	0	0	0	0	0	0	0	0	0	0	0	0	0	0	0	0	0	0	0	0	0
ENSMUSG00000031889.9	76	167	113	33	29	12	293	36	28	83	98	31	15	15	41	110	129	49	101	81	40	24	62	65	107	65	51	39	16	35	26	57	22
ENSMUSG00000037846.18	9	0	0	8	9	0	2	0	0	0	20	2	0	0	3	1	0	0	0	1	5	0	0	12	0	1	1	0	0	1	0	0	0
ENSMUSG00000059626.13	0	0	0	0	0	0	0	0	0	0	0	0	0	0	0	0	0	0	0	0	0	0	0	0	0	0	0	0	0	0	0	0	0
ENSMUSG00000095008.1	0	0	0	0	0	0	0	0	0	0	0	0	0	0	0	0	0	0	0	0	0	0	0	0	0	0	0	0	0	0	0	0	0
ENSMUSG00000110281.1	0	0	0	0	0	0	0	0	0	0	0	0	0	0	0	0	0	0	0	0	0	0	0	0	0	0	0	0	0	0	0	0	0
ENSMUSG00000111619.1	0	0	0	0	0	0	0	0	0	0	0	0	0	0	0	0	0	0	0	0	0	0	0	0	0	0	0	0	0	0	0	0	0
ENSMUSG00000083066.1	0	0	0	0	0	0	0	0	0	0	0	0	0	0	0	0	0	0	0	0	0	0	0	0	0	0	0	0	0	0	0	0	0
ENSMUSG00000057564.6	0	0	0	0	0	0	0	0	0	0	0	0	0	0	0	0	0	0	0	0	0	0	0	0	0	0	0	0	0	0	0	0	0
ENSMUSG00000106643.1	0	0	0	0	0	0	0	0	0	0	0	0	0	0	0	0	0	0	0	0	0	0	0	0	0	0	0	0	0	0	0	0	0
ENSMUSG00000040451.17	201	953	576	84	37	102	561	177	69	239	90	127	76	53	90	237	335	214	480	230	225	28	180	130	455	128	140	139	113	135	129	53	99
ENSMUSG00000065669.1	0	0	0	0	0	0	0	0	0	0	1	0	0	1	0	0	5	8	0	0	0	0	1	0	0	0	1	0	0	0	0	0	0
ENSMUSG00000098703.1	0	0	0	0	0	0	0	0	0	0	0	0	0	0	0	0	0	0	0	0	0	0	0	0	0	0	0	0	0	0	0	0	0
ENSMUSG00000022270.16	361	1088	963	24	41	95	687	161	126	108	125	177	132	26	71	221	342	293	505	204	168	107	240	187	730	196	201	119	77	82	79	66	88
ENSMUSG00000020027.18	48	50	141	5	8	0	96	19	11	15	9	7	0	2	8	4	2	0	4	20	16	4	17	34	16	1	8	0	1	12	1	10	0
ENSMUSG00000101011.6	0	0	0	0	0	0	0	0	0	0	0	0	0	0	0	0	0	0	0	0	0	0	0	0	0	0	0	0	0	0	0	0	0
ENSMUSG00000093554.1	0	0	0	0	0	0	0	0	0	0	0	0	0	0	0	0	0	0	0	0	0	0	0	0	0	0	0	0	0	0	0	0	0
ENSMUSG00000086761.1	0	0	0	0	0	0	0	0	0	0	0	0	0	0	0	0	0	0	0	0	0	0	0	0	0	0	0	0	0	0	0	0	0
ENSMUSG00000034087.14	0	0	0	0	0	0	0	0	0	0	0	0	0	0	0	0	0	0	0	0	0	0	0	0	0	0	0	0	0	0	0	0	0
ENSMUSG00000089916.1	0	0	0	0	0	0	0	0	0	0	0	0	0	0	0	0	0	0	0	0	0	0	0	0	0	0	1	0	0	0	0	0	0
ENSMUSG00000055061.5	0	0	0	0	0	0	0	0	0	0	0	0	0	0	0	0	0	0	0	0	0	0	0	0	0	0	0	0	0	0	0	0	0
ENSMUSG00000104140.1	0	0	0	0	0	0	0	0	0	0	0	0	0	0	0	0	0	0	0	0	0	0	0	0	0	0	0	0	0	0	0	0	0
ENSMUSG00000039481.5	0	0	0	0	1	0	0	0	0	0	3	0	0	0	0	0	0	0	0	0	0	0	1	0	0	0	0	0	0	0	0	0	0
ENSMUSG00000054945.3	12	123	84	0	0	4	21	9	5	7	18	11	0	0	2	15	28	30	9	13	7	0	3	9	12	6	4	0	6	5	4	0	0
ENSMUSG00000020090.7	0	0	0	0	0	0	0	0	0	0	0	0	0	0	0	0	0	0	0	0	0	0	0	0	0	0	0	0	0	0	0	0	0
ENSMUSG00000020280.12	106	348	285	18	9	16	384	80	60	76	142	70	8	13	47	65	54	19	114	93	88	15	69	80	229	41	50	83	40	45	16	49	34
ENSMUSG00000114748.1	0	0	0	0	0	0	0	0	0	0	0	0	0	0	0	0	0	0	0	0	0	0	0	0	0	0	0	0	0	0	0	0	0
ENSMUSG00000084378.1	0	0	0	0	0	0	0	0	0	0	0	0	0	0	0	0	0	0	0	0	0	0	0	0	0	0	0	0	0	0	0	0	0
ENSMUSG00000026940.3	0	0	0	0	0	0	0	0	0	0	0	0	0	0	0	0	0	0	0	0	0	0	0	0	0	0	0	0	0	0	0	0	0
ENSMUSG00000096200.1	0	0	0	0	0	0	0	0	0	0	0	0	0	0	0	0	0	0	0	0	0	0	0	0	0	0	0	0	0	0	0	0	0
ENSMUSG00000098137.3	0	0	0	0	0	0	0	0	0	0	0	0	0	0	0	0	0	0	0	0	0	0	0	0	0	0	0	0	0	0	0	0	0
ENSMUSG00000109772.1	0	0	0	0	0	0	0	0	0	0	0	0	0	0	0	0	0	0	0	0	0	0	0	0	0	0	0	0	0	0	0	0	0
ENSMUSG00000000216.8	0	0	0	0	0	0	0	0	0	0	0	0	0	0	0	0	0	0	0	0	0	0	2	15	0	0	0	0	0	0	0	0	0
ENSMUSG00000044457.8	0	0	0	0	0	0	0	0	0	0	0	0	0	0	0	0	0	0	0	0	0	0	0	0	0	0	0	0	0	0	0	0	0
ENSMUSG00000021428.9	174	444	510	13	9	51	878	203	113	109	282	86	53	27	62	163	222	169	316	169	196	90	167	160	316	125	95	58	76	129	97	103	49
ENSMUSG00000028565.18	17	0	15	0	0	0	18	7	1	13	24	5	0	0	3	2	5	0	3	15	17	0	6	36	12	3	9	4	1	15	0	0	0
ENSMUSG00000063166.4	0	0	0	0	0	0	0	0	0	0	0	0	0	0	0	0	0	0	0	0	0	0	0	1	0	0	0	0	0	0	0	0	0
ENSMUSG00000094866.1	0	0	0	0	0	0	0	0	0	0	0	0	0	0	0	0	0	0	0	0	0	0	0	0	0	0	0	0	0	0	0	0	0
ENSMUSG00000089890.1	0	0	0	0	0	0	0	0	0	0	7	0	0	0	0	0	0	0	0	0	0	0	0	0	0	0	0	0	0	0	0	0	0
ENSMUSG00000031170.14	111	185	159	106	260	346	52	16	4	1	10	3	7	0	0	109	124	216	118	263	201	1	6	12	43	2	13	47	51	61	230	223	168
ENSMUSG00000047586.3	0	0	0	0	0	0	0	0	0	0	0	0	0	0	0	0	0	0	0	0	0	0	0	0	0	0	0	0	0	0	0	0	0
ENSMUSG00000112245.1	0	0	0	0	0	0	0	0	0	0	0	0	0	0	0	0	0	0	0	0	0	0	0	0	0	0	0	0	0	0	0	0	0
ENSMUSG00000107389.1	0	0	0	0	0	0	1	0	0	0	0	0	0	0	0	0	0	0	0	0	0	0	0	0	0	0	0	0	0	0	0	0	0
ENSMUSG00000037465.10	67	171	237	15	28	39	264	123	36	109	75	34	46	18	55	86	79	109	111	78	66	12	135	126	278	52	51	53	19	18	71	49	65
ENSMUSG00000050625.4	0	0	0	0	0	0	0	0	0	0	0	0	0	0	0	0	0	0	0	0	0	0	0	0	0	0	0	0	0	0	0	0	0
ENSMUSG00000048787.13	44	87	83	4	2	4	125	25	21	34	39	25	1	6	16	32	44	43	73	30	20	11	25	29	73	30	26	6	23	12	11	13	7
ENSMUSG00000009093.7	0	0	0	0	0	0	0	0	0	0	0	2	0	0	0	0	0	0	0	0	0	0	0	1	0	0	0	0	0	0	0	0	0
ENSMUSG00000035161.7	94	548	475	22	32	65	445	124	53	93	146	81	19	14	25	133	199	211	262	147	144	32	119	117	125	90	89	70	67	67	49	53	36
ENSMUSG00000028133.17	28	0	106	0	0	0	8	1	0	5	18	1	0	0	1	3	15	11	0	20	4	1	8	5	2	2	2	4	0	10	7	0	2
ENSMUSG00000099449.1	0	0	0	0	0	0	0	0	0	0	0	0	0	0	0	0	0	0	0	0	0	0	0	0	0	0	0	0	0	0	0	0	0
ENSMUSG00000026575.15	41	108	42	8	6	4	309	51	28	60	88	40	3	12	23	54	25	72	60	41	46	7	48	49	103	58	32	30	9	12	1	32	25
ENSMUSG00000076300.1	0	0	0	0	0	0	0	0	0	0	0	0	0	0	0	0	0	0	0	0	0	0	0	0	0	0	0	0	0	0	0	0	0
ENSMUSG00000092363.1	0	0	0	0	0	0	0	0	0	0	0	0	0	0	0	0	0	0	0	0	0	0	0	0	0	0	0	0	0	0	0	0	0
ENSMUSG00000032737.13	14	122	28	3	0	1	91	16	17	32	14	12	17	7	7	41	17	1	35	28	21	6	93	59	49	25	9	5	13	15	24	0	19
ENSMUSG00000108607.2	0	0	0	0	0	0	8	0	0	0	1	0	0	0	1	0	0	0	0	0	0	0	0	0	0	0	0	0	0	5	0	0	0
ENSMUSG00000110791.1	3	0	0	0	0	0	10	7	0	4	3	3	0	1	0	5	9	0	3	3	5	5	8	1	5	1	1	1	0	7	4	0	0
ENSMUSG00000021415.13	0	0	0	0	0	0	0	0	0	0	0	0	0	0	0	0	0	0	0	0	0	0	0	0	0	0	0	0	0	0	0	0	0
ENSMUSG00000097995.1	0	0	0	0	0	0	0	0	0	0	0	0	0	0	0	0	0	0	0	0	0	0	0	0	0	0	0	0	0	0	0	0	0
ENSMUSG00000115374.1	0	0	0	0	0	0	0	0	0	0	0	0	0	0	0	0	0	0	0	0	0	0	0	0	0	0	0	0	0	0	0	0	0
ENSMUSG00000003234.15	237	572	456	38	3	57	931	250	146	188	292	136	76	35	58	270	202	206	247	154	165	84	315	222	391	160	109	131	78	69	83	67	86
ENSMUSG00000108581.1	0	0	0	0	0	0	0	0	0	0	0	0	0	0	0	0	0	0	0	0	0	0	0	0	0	0	0	0	0	0	0	0	0
ENSMUSG00000032305.15	28	225	67	7	3	19	207	51	20	29	80	37	5	3	21	51	63	26	115	19	44	1	87	70	125	36	24	2	9	38	17	5	19
ENSMUSG00000095492.1	0	0	0	0	0	0	0	0	0	0	0	0	0	0	0	0	0	0	0	0	0	0	0	0	0	0	0	0	0	0	0	0	0
ENSMUSG00000039628.8	0	0	0	0	0	0	0	0	0	0	1	0	4	0	0	0	0	0	0	0	0	0	0	0	0	0	0	0	0	0	0	0	0
ENSMUSG00000102833.1	0	0	0	0	0	0	1	0	0	0	1	0	0	0	0	0	0	0	0	0	0	0	0	1	0	0	0	0	1	0	0	0	0
ENSMUSG00000084405.2	0	0	0	0	0	0	0	0	0	0	0	0	0	0	0	0	0	0	0	0	0	0	0	0	0	0	0	0	0	0	0	0	0
ENSMUSG00000051251.3	0	0	0	0	0	0	0	0	0	0	0	0	0	0	0	0	0	0	0	0	0	0	0	0	0	0	0	0	0	0	0	0	0
ENSMUSG00000082951.1	0	0	0	0	0	0	0	0	0	0	0	0	0	0	1	0	0	0	0	0	0	0	0	0	0	0	0	0	0	0	0	0	0
ENSMUSG00000111054.1	0	0	0	0	0	0	0	0	0	0	0	0	0	0	0	0	0	0	0	0	0	0	0	0	0	0	0	0	0	0	0	0	0
ENSMUSG00000028184.12	1	38	15	0	0	0	4	4	0	1	1	1	0	0	1	12	13	9	1	3	9	3	0	18	1	0	1	8	4	4	0	0	2
ENSMUSG00000107416.1	0	0	0	0	0	0	0	0	0	0	0	0	0	0	0	0	0	0	0	0	0	0	0	0	0	0	0	0	0	0	0	0	0
ENSMUSG00000100330.1	0	0	0	0	0	0	0	0	0	0	0	0	0	0	0	0	0	0	0	0	0	0	0	0	0	0	0	0	0	0	0	0	0
ENSMUSG00000091172.1	0	0	0	0	0	0	0	0	0	0	0	0	0	0	0	1	0	0	0	0	0	0	0	0	0	0	0	0	0	0	0	0	0
ENSMUSG00000094327.1	0	0	0	0	0	0	0	0	0	0	0	0	0	0	0	0	0	0	0	0	0	0	0	0	0	0	0	0	0	0	0	0	0
ENSMUSG00000056883.5	0	0	0	0	0	0	0	0	0	0	0	0	0	0	0	0	0	0	0	0	0	0	0	0	0	0	0	0	0	0	0	0	0
ENSMUSG00000110938.1	0	0	0	0	0	0	0	0	0	0	0	0	0	0	0	0	0	0	0	0	0	0	0	0	0	0	0	0	0	0	0	0	0
ENSMUSG00000107899.1	0	0	0	0	0	0	0	0	0	0	4	0	0	0	0	0	0	0	0	0	0	0	0	0	2	0	0	0	0	0	0	0	2
ENSMUSG00000030315.15	30	156	65	13	3	9	247	67	48	57	103	41	39	10	31	109	76	74	81	79	58	26	86	55	140	73	39	37	14	49	28	15	21
ENSMUSG00000035671.6	20	50	9	20	11	38	117	21	6	18	47	12	8	5	12	51	11	5	28	27	26	14	40	19	16	26	6	27	30	10	46	9	18
ENSMUSG00000087534.1	0	0	0	0	0	0	0	0	0	0	0	0	0	0	0	0	0	0	0	0	0	0	0	0	0	0	0	0	0	0	0	0	0
ENSMUSG00000105962.1	0	0	0	0	0	0	1	0	0	0	0	0	0	0	0	0	0	0	0	0	0	0	0	0	0	0	0	0	0	0	0	0	0
ENSMUSG00000099959.1	0	0	0	0	0	0	0	0	0	0	0	0	0	0	0	0	0	0	0	0	0	0	0	0	0	0	0	0	0	0	0	0	0
ENSMUSG00000054770.16	114	140	181	23	69	9	239	43	26	58	127	27	26	9	26	64	80	24	80	24	57	8	69	44	87	35	20	19	40	28	65	22	31
ENSMUSG00000114183.1	0	0	0	0	0	0	0	0	0	0	0	0	0	0	0	0	0	0	0	0	0	0	0	0	0	0	0	0	0	0	0	0	0
ENSMUSG00000021466.12	46	79	472	7	2	9	83	25	17	14	73	12	13	4	7	28	55	50	84	46	22	8	28	34	58	12	10	0	0	10	0	2	7
ENSMUSG00000090007.1	0	0	0	0	0	0	0	0	0	0	0	0	0	0	0	0	0	0	0	0	0	0	0	0	0	0	0	0	0	0	0	0	0
ENSMUSG00000115401.1	0	0	0	0	0	0	0	0	0	0	0	0	0	0	0	0	0	0	0	0	0	0	0	0	0	0	0	0	0	0	0	0	0
ENSMUSG00000103579.1	0	0	0	0	0	0	0	0	0	0	0	0	0	0	0	0	0	0	0	0	0	0	0	0	0	0	0	0	0	0	0	0	0
ENSMUSG00000027713.6	0	0	27	0	1	0	3	1	0	1	0	1	0	0	3	0	0	0	0	1	1	0	5	2	4	0	0	0	0	0	0	0	0
ENSMUSG00000095639.1	0	0	0	0	0	0	0	0	0	0	0	0	0	0	0	0	0	0	0	0	0	0	0	0	0	0	0	0	0	0	0	0	0
ENSMUSG00000032356.12	0	0	18	0	0	0	0	0	0	0	0	0	0	0	0	0	0	0	0	0	0	0	0	0	0	0	0	0	0	0	0	0	8
ENSMUSG00000083697.1	0	0	0	0	0	0	0	0	0	0	0	0	0	0	0	0	0	0	0	0	0	0	0	0	0	0	0	0	0	0	0	0	0
ENSMUSG00000041890.17	65	58	115	14	9	21	168	30	35	27	99	23	9	3	13	62	36	110	53	40	24	23	60	43	110	42	26	21	11	29	21	20	9
ENSMUSG00000113018.1	0	0	0	0	0	0	0	0	0	0	0	0	0	0	0	0	0	0	0	0	0	0	0	0	0	0	0	0	0	0	0	0	0
ENSMUSG00000084915.2	3	6	7	0	0	0	8	0	1	0	8	1	5	1	2	1	2	0	6	19	3	0	1	4	3	1	0	10	3	8	7	3	0
ENSMUSG00000108042.1	0	0	0	0	0	0	0	0	0	0	0	0	0	0	0	0	0	0	0	0	0	0	0	0	0	0	0	0	0	0	0	0	0
ENSMUSG00000101076.2	0	0	0	0	0	0	0	0	0	0	0	0	0	0	0	0	0	0	0	0	0	0	0	0	0	0	0	0	0	0	0	0	0
ENSMUSG00000002664.2	0	0	0	0	0	0	0	0	0	0	0	0	0	0	0	0	0	0	0	0	0	0	0	0	0	0	0	0	0	0	0	0	0
ENSMUSG00000070107.1	0	0	0	0	0	0	0	0	0	0	0	0	0	0	0	0	0	0	0	0	0	0	0	0	0	0	0	0	0	0	0	0	0
ENSMUSG00000111564.1	0	0	0	0	0	0	0	0	0	0	0	0	0	0	0	0	0	0	0	0	0	0	0	0	0	0	0	0	0	0	0	0	0
ENSMUSG00000030366.10	0	0	0	0	0	0	0	0	0	0	0	0	0	0	0	0	0	0	0	0	0	0	0	0	0	0	0	0	0	0	0	0	0
ENSMUSG00000088160.1	0	0	0	0	0	0	0	0	0	0	0	0	0	0	0	0	0	0	0	0	0	0	0	0	0	0	0	0	0	0	0	0	0
ENSMUSG00000056910.4	0	0	0	0	0	0	0	0	0	0	0	0	0	0	0	0	0	0	0	0	0	0	0	0	0	0	0	0	0	0	0	0	0
ENSMUSG00000081194.1	0	0	0	0	0	0	0	0	0	0	0	0	0	0	0	0	0	0	0	0	0	0	0	0	0	0	0	0	0	0	0	0	0
ENSMUSG00000104771.1	0	0	0	0	0	0	0	0	0	0	0	0	0	0	0	0	0	0	0	0	0	0	0	0	0	0	0	0	0	0	0	0	0
ENSMUSG00000098768.1	0	0	0	0	0	0	0	0	0	0	0	0	0	0	0	0	0	0	0	0	0	0	0	0	0	0	0	0	0	0	0	0	0
ENSMUSG00000044039.4	0	0	0	0	0	0	0	0	0	0	0	0	0	0	0	0	0	0	0	0	0	0	0	0	0	0	0	0	0	0	0	0	0
ENSMUSG00000107926.1	0	0	0	0	0	0	0	0	0	0	0	0	0	0	0	0	0	0	0	0	0	0	0	0	0	0	0	0	0	0	0	0	0
ENSMUSG00000049551.2	0	0	0	0	0	0	0	0	0	0	0	0	0	0	0	1	0	0	0	0	0	0	2	0	0	2	0	0	0	0	0	0	0
ENSMUSG00000039063.5	31	0	0	0	0	0	5	2	4	3	3	0	4	0	1	1	0	0	0	0	7	2	1	3	20	4	1	0	0	1	0	0	0
ENSMUSG00000091682.2	0	0	0	0	0	0	1	0	0	0	5	1	0	0	0	0	0	0	0	0	0	0	0	0	0	0	0	0	0	0	0	22	0
ENSMUSG00000114210.1	0	0	0	0	0	0	0	0	0	0	0	0	0	0	0	0	0	0	0	0	0	0	0	0	0	0	0	0	0	0	0	0	0
ENSMUSG00000024844.14	76	118	136	9	34	55	760	196	147	99	218	77	40	18	48	140	71	145	80	67	64	12	150	152	137	84	40	50	20	31	77	30	46
ENSMUSG00000109354.2	0	0	0	0	0	0	0	0	0	0	0	0	0	0	0	0	0	0	0	0	0	0	0	0	0	0	0	0	0	0	0	0	0
ENSMUSG00000103606.1	0	0	0	0	0	0	0	0	0	0	0	0	0	0	0	0	0	0	0	0	0	0	0	0	0	0	0	0	0	0	0	0	0
ENSMUSG00000070327.14	476	1747	1727	158	229	220	3966	2858	1842	681	1486	2510	1856	111	199	1166	1781	2009	2007	705	764	243	2058	1638	2311	1545	944	390	242	471	433	353	328
ENSMUSG00000114693.1	0	0	0	0	0	0	0	0	0	0	0	0	0	0	0	0	0	0	0	0	0	0	0	0	0	0	0	0	0	0	0	0	0
ENSMUSG00000096265.2	0	0	0	0	0	0	0	0	0	0	0	0	0	0	0	0	0	0	0	0	0	0	0	0	0	0	0	0	0	0	0	0	0
ENSMUSG00000102388.5	0	0	0	0	0	0	0	0	0	0	0	0	0	0	0	0	0	0	0	0	0	0	0	0	0	0	0	0	0	0	0	0	0
ENSMUSG00000073236.4	68	42	58	10	13	21	59	7	10	7	19	8	6	1	3	13	83	49	55	32	29	0	31	17	67	13	8	18	29	6	53	0	4
ENSMUSG00000052146.15	1248	2539	2023	460	641	972	4705	1361	868	1130	1259	758	468	248	489	1862	1492	1405	1659	1527	1782	233	1760	1195	2680	850	479	538	659	723	754	615	565
ENSMUSG00000049109.15	114	659	748	32	29	31	1177	79	74	122	1946	75	78	49	75	176	155	107	264	147	166	42	118	86	332	70	57	75	58	88	102	59	75
ENSMUSG00000047168.6	0	0	0	0	0	0	0	0	0	0	0	0	0	0	0	0	0	0	0	0	0	0	0	0	0	0	0	0	0	0	0	0	0
ENSMUSG00000101103.1	0	0	0	0	0	0	0	0	0	0	0	0	0	0	0	0	0	0	0	0	0	0	0	0	0	0	0	0	0	0	0	0	0
ENSMUSG00000110373.1	0	0	0	0	0	0	0	0	0	0	0	0	0	0	0	0	0	0	0	0	0	0	0	0	0	0	0	0	0	0	0	0	0
ENSMUSG00000046932.2	0	0	0	0	0	0	0	0	0	0	0	0	0	0	0	0	0	0	0	0	0	0	0	0	0	0	0	0	0	0	0	0	0
ENSMUSG00000088307.1	0	0	0	0	0	0	0	0	0	0	0	0	0	0	0	0	0	0	0	0	0	0	0	0	0	0	0	0	0	0	0	0	0
ENSMUSG00000099394.1	0	0	0	0	0	0	0	0	0	0	0	0	0	0	0	0	0	0	0	0	0	0	0	0	0	0	0	0	0	0	0	0	0
ENSMUSG00000106735.1	0	0	0	0	0	0	0	0	0	0	0	0	0	0	0	0	0	0	0	0	0	0	0	0	0	0	0	0	0	0	0	0	0
ENSMUSG00000001473.6	74	118	38	30	26	21	352	134	34	134	62	21	51	7	29	174	81	49	81	100	161	16	195	178	184	57	29	84	11	51	33	57	45
ENSMUSG00000073705.10	7	55	2	0	6	16	128	37	19	10	44	18	10	6	5	15	14	12	7	2	15	3	14	11	44	11	3	2	7	12	0	5	3
ENSMUSG00000013415.9	0	0	0	0	0	0	0	0	0	0	0	0	0	0	0	0	0	0	0	0	0	0	0	2	0	0	0	0	0	0	0	0	0
ENSMUSG00000019817.18	0	0	0	0	0	0	0	0	0	0	0	0	3	0	0	0	0	0	0	0	0	0	0	1	0	0	0	0	0	0	0	0	0
ENSMUSG00000070617.2	0	0	0	0	0	0	0	0	0	0	0	0	0	0	0	0	0	0	0	0	0	0	0	0	0	0	0	0	0	0	0	0	0
ENSMUSG00000023903.7	5	0	0	13	0	34	21	5	20	12	9	22	5	0	1	4	2	0	4	0	1	0	20	4	0	19	25	0	0	0	0	0	3
ENSMUSG00000081221.4	0	0	0	0	0	0	2	0	0	1	0	0	0	0	0	0	0	0	0	0	0	0	0	0	0	0	0	1	0	0	0	0	0
ENSMUSG00000020864.13	75	311	89	33	28	65	496	106	60	107	233	55	56	18	38	146	103	194	295	173	126	54	122	112	198	73	51	34	54	80	41	40	64
ENSMUSG00000104232.1	0	0	0	0	0	0	0	0	0	0	0	0	0	0	0	0	0	0	0	0	0	0	0	0	0	0	0	0	0	0	0	0	0
ENSMUSG00000031754.10	138	340	616	60	110	57	1186	324	210	212	277	161	77	49	117	187	238	116	251	140	185	53	181	247	346	183	202	122	78	126	65	101	76
ENSMUSG00000114720.1	0	0	0	0	0	0	0	0	0	0	0	0	0	0	0	0	0	0	0	0	0	0	0	0	0	0	0	0	0	0	0	0	0
ENSMUSG00000095074.4	0	0	0	0	0	0	0	0	0	0	0	0	0	0	0	0	0	0	0	0	0	0	0	0	0	0	0	0	0	0	0	0	0
ENSMUSG00000109864.1	0	30	0	0	0	0	0	0	0	0	0	1	0	0	0	0	0	0	0	2	0	0	0	0	0	0	0	0	0	0	0	0	0
ENSMUSG00000084350.1	32	90	63	17	0	21	69	15	0	23	25	12	23	4	16	37	3	23	60	11	29	4	39	18	101	10	9	0	5	11	18	1	17
ENSMUSG00000021400.7	74	228	54	21	24	51	401	67	52	60	112	54	18	26	41	127	152	79	133	62	54	27	109	81	115	93	44	35	6	30	45	48	28
ENSMUSG00000009185.2	0	0	0	0	0	26	12	13	3	1	3	3	0	0	3	3	3	0	1	9	31	0	2	13	7	0	0	0	3	0	0	0	0
ENSMUSG00000100961.1	0	0	0	0	0	0	0	0	0	0	0	0	0	0	0	0	0	0	0	0	0	0	0	0	0	0	0	0	0	0	0	0	0
ENSMUSG00000079494.2	0	0	0	0	0	0	0	0	0	0	0	0	0	0	0	0	0	0	0	0	0	0	0	0	0	0	0	0	0	0	0	0	0
ENSMUSG00000094958.1	0	0	0	0	0	0	0	0	0	0	0	0	0	0	0	0	0	0	0	0	0	0	0	0	0	0	0	0	0	0	0	0	0
ENSMUSG00000047678.1	0	0	0	0	0	0	0	2	0	0	0	0	0	0	0	0	0	0	0	0	1	0	0	0	0	0	0	1	0	0	0	0	0
ENSMUSG00000026021.15	736	1489	1663	165	163	456	2483	655	500	425	734	335	242	101	194	633	781	926	789	685	905	119	555	585	1672	262	307	286	242	377	596	480	413
ENSMUSG00000112337.1	0	0	0	0	0	0	0	0	0	0	0	0	0	0	0	0	0	0	0	0	0	0	0	0	0	0	0	0	0	0	0	0	0
ENSMUSG00000000693.10	1	28	23	0	3	0	63	6	10	7	2	6	8	7	6	12	16	3	5	4	10	0	30	21	48	10	3	2	4	7	4	2	4
ENSMUSG00000110400.1	0	0	0	0	0	0	0	0	0	0	0	0	0	0	0	0	0	0	0	0	0	0	0	0	0	0	0	0	0	0	0	0	0
ENSMUSG00000105544.1	0	0	0	0	0	0	0	0	0	0	0	0	0	0	0	0	0	0	0	0	0	0	0	0	0	0	0	0	0	0	0	0	0
ENSMUSG00000092455.1	0	0	0	0	0	0	0	0	0	0	0	0	0	0	0	0	0	0	0	0	0	0	0	0	0	0	0	0	0	0	0	0	0
ENSMUSG00000029191.16	270	856	566	31	6	66	786	213	121	116	398	134	97	38	53	275	251	330	293	177	192	60	238	227	346	142	78	163	114	131	99	66	118
ENSMUSG00000099421.1	0	0	0	0	0	0	0	0	0	0	0	0	0	0	0	0	0	0	0	0	0	0	0	0	0	0	0	0	0	0	0	0	0
ENSMUSG00000064450.1	0	0	0	0	0	0	0	0	0	0	0	0	0	0	0	0	0	0	0	0	0	0	0	0	0	0	0	0	0	0	0	0	0
ENSMUSG00000089982.7	0	0	0	0	0	0	0	0	0	0	0	0	0	0	0	0	0	0	0	0	0	0	0	0	0	0	0	0	0	0	0	0	0
ENSMUSG00000048939.13	0	0	0	0	0	0	0	0	0	0	0	0	0	0	0	0	0	0	0	0	0	0	0	0	0	0	0	0	0	0	0	0	0
ENSMUSG00000088817.1	0	0	0	0	0	0	0	0	0	0	0	0	0	0	0	0	0	0	0	0	0	0	0	0	0	0	0	0	0	0	0	0	0
ENSMUSG00000076875.1	0	0	0	0	0	0	0	0	0	0	4	1	0	0	0	0	0	0	0	0	0	0	0	0	0	0	0	0	0	0	0	0	0
ENSMUSG00000019868.16	162	377	389	56	38	83	1000	234	137	159	250	151	98	37	95	207	186	95	197	134	187	28	250	166	283	167	97	143	83	94	98	98	52
ENSMUSG00000029112.5	0	0	0	0	0	0	0	0	0	0	0	0	0	0	0	0	0	0	0	0	0	0	0	0	0	0	0	0	0	0	0	0	0
ENSMUSG00000103041.1	32	162	168	1	18	13	81	28	12	28	39	21	3	4	7	20	19	81	51	17	19	0	29	32	33	11	21	19	7	10	13	25	5
ENSMUSG00000001983.7	46	90	69	6	1	21	103	29	14	20	29	12	27	2	3	38	25	38	44	34	14	2	29	17	57	12	15	7	6	18	65	7	6
ENSMUSG00000097038.1	0	0	0	0	0	0	0	0	0	0	0	0	0	0	0	0	0	0	0	0	0	0	0	0	0	0	0	0	0	0	0	0	0
ENSMUSG00000115466.1	0	0	0	0	0	0	0	0	0	0	0	0	0	0	0	0	0	0	0	0	0	0	0	0	0	0	0	0	0	0	0	0	0
ENSMUSG00000053846.4	0	0	0	12	0	0	222	18	15	69	5	70	6	7	16	3	1	0	0	0	0	13	0	17	0	108	231	0	0	0	0	0	0
ENSMUSG00000108673.1	0	0	0	0	0	0	0	0	0	0	0	0	0	0	0	0	0	0	0	0	0	0	0	0	0	0	0	0	0	0	0	0	0
ENSMUSG00000062866.16	20	107	84	12	11	18	64	13	16	16	19	18	17	5	14	29	59	32	2	9	26	2	32	44	47	9	15	10	1	30	8	17	6
ENSMUSG00000095101.2	0	0	0	0	0	0	0	0	0	0	0	0	0	0	0	0	0	0	0	0	0	0	0	0	0	0	0	0	0	0	0	0	0
ENSMUSG00000095584.1	0	0	0	0	0	0	0	0	0	0	0	0	0	0	0	0	0	0	0	0	0	0	0	0	0	0	0	0	0	0	0	0	0
ENSMUSG00000102925.1	0	0	0	0	0	0	0	0	0	0	0	0	0	0	0	0	0	0	0	0	0	0	0	0	0	0	0	0	0	0	0	0	0
ENSMUSG00000079521.2	0	0	0	0	0	0	0	0	0	0	0	0	0	0	0	0	0	0	0	0	0	0	0	0	0	0	0	0	0	0	0	0	0
ENSMUSG00000056912.12	0	0	0	0	0	0	0	0	0	0	0	0	0	0	0	0	0	0	0	0	0	0	0	0	0	0	0	0	0	0	0	0	0
ENSMUSG00000111146.1	0	0	0	0	0	0	0	0	0	0	0	0	0	0	0	0	0	0	0	0	0	0	0	0	0	0	0	0	0	0	0	0	0
ENSMUSG00000106170.1	0	0	0	0	0	0	0	0	0	0	0	0	0	0	0	0	0	0	0	0	0	0	0	0	0	0	0	0	0	0	0	0	0
ENSMUSG00000107508.1	0	0	0	0	0	0	0	0	0	0	0	0	0	0	0	0	0	0	0	0	0	0	0	0	0	0	0	0	0	0	0	0	0
ENSMUSG00000046487.6	0	0	0	0	0	0	0	0	0	0	0	0	0	0	0	0	0	0	0	0	0	0	1	0	0	0	0	0	0	0	0	0	0
ENSMUSG00000000901.16	2	25	0	0	0	0	4	2	0	0	13	4	0	1	0	3	10	0	0	0	0	0	2	11	0	2	1	0	4	4	0	0	0
ENSMUSG00000000792.2	0	0	0	0	0	0	0	0	0	0	2	0	0	0	0	0	0	0	0	0	0	0	0	0	0	0	1	0	0	0	0	0	0
ENSMUSG00000100422.1	0	0	0	0	0	0	0	0	0	0	0	0	0	0	0	0	0	0	0	0	0	0	0	0	0	0	0	0	0	0	0	0	0
ENSMUSG00000065196.1	0	0	0	0	0	0	0	0	0	0	0	0	0	0	0	0	0	0	0	0	0	0	0	0	0	0	0	0	0	0	0	0	0
ENSMUSG00000077138.2	0	0	0	0	0	0	0	0	0	0	0	0	0	0	0	0	0	0	0	0	0	0	0	0	0	0	0	0	0	0	0	0	0
ENSMUSG00000071766.12	0	0	0	0	0	0	0	0	0	0	0	0	0	0	0	0	0	0	11	0	0	0	0	0	0	0	0	0	0	0	0	0	0
ENSMUSG00000020483.14	82	18	75	1	1	8	133	51	23	16	39	17	14	3	16	26	37	23	57	9	24	0	26	58	49	14	15	14	12	3	7	5	2
ENSMUSG00000091264.3	80	76	137	18	13	1	167	40	45	31	148	12	9	10	13	28	34	55	102	38	45	7	60	43	134	19	20	6	6	24	3	28	26
ENSMUSG00000087626.1	82	98	135	0	0	0	83	10	15	4	20	24	19	0	4	3	59	18	135	0	2	0	32	2	156	2	0	0	1	5	9	0	0
ENSMUSG00000110910.1	0	0	9	0	0	0	4	1	0	0	0	1	0	0	0	0	0	0	0	0	0	0	0	0	0	2	0	0	0	0	0	0	0
ENSMUSG00000080540.2	0	0	0	0	0	0	0	0	0	0	0	0	0	0	0	0	0	0	0	0	0	0	0	0	0	0	0	0	0	0	0	0	0
ENSMUSG00000076902.1	0	20	0	0	0	0	0	0	0	0	0	0	0	0	0	0	0	0	0	0	0	0	0	0	0	0	0	0	0	0	0	0	0
ENSMUSG00000114275.1	0	0	0	0	0	0	0	0	0	0	0	0	0	0	0	0	0	0	0	0	0	0	0	0	0	0	0	0	0	0	0	0	0
ENSMUSG00000064960.1	0	0	0	0	0	0	0	0	0	0	0	0	0	0	0	0	0	0	0	0	0	0	0	0	0	0	0	0	0	0	0	0	0
ENSMUSG00000098230.7	0	0	0	0	0	0	0	0	0	0	0	0	0	0	0	0	0	0	0	0	0	0	0	0	0	0	0	0	0	0	0	0	0
ENSMUSG00000101734.1	0	0	0	0	0	0	0	0	0	0	0	0	0	0	0	0	0	0	0	0	0	0	0	0	0	0	0	0	0	0	0	0	0
ENSMUSG00000085123.2	0	0	0	0	0	0	0	0	0	0	0	0	0	0	0	0	0	0	0	0	0	0	0	0	0	0	0	0	0	0	0	0	0
ENSMUSG00000108700.1	0	0	0	0	0	0	0	0	0	0	2	0	0	0	0	0	0	0	0	0	1	0	0	0	0	1	0	0	0	0	0	0	0
ENSMUSG00000031443.7	122	0	3	7	11	2	45	51	0	132	13	3	6	12	24	37	8	0	13	6	43	2	53	68	74	7	12	2	1	5	4	0	2
ENSMUSG00000019487.11	11	33	17	4	7	4	75	19	9	12	11	19	14	4	11	21	8	2	13	18	23	9	23	28	13	21	8	1	7	20	0	4	6
ENSMUSG00000053153.14	0	0	0	0	0	0	0	0	0	0	2	0	0	0	0	0	0	0	0	0	0	0	0	0	0	0	0	0	0	0	0	0	0
ENSMUSG00000083789.1	0	0	0	0	0	0	0	0	0	0	0	0	0	0	0	0	0	0	0	0	0	0	0	0	0	0	0	0	0	0	0	0	0
ENSMUSG00000064043.13	1	0	18	1	6	13	58	6	2	2	17	1	1	2	3	5	5	13	11	2	0	1	16	8	3	1	2	15	0	0	0	0	0
ENSMUSG00000106317.1	8	11	10	3	1	8	24	5	4	6	4	1	0	0	3	4	12	0	28	12	14	0	9	11	18	1	0	0	1	11	2	5	7
ENSMUSG00000022092.11	216	904	795	54	63	83	1376	269	161	246	162	180	112	65	139	361	316	241	439	271	264	109	162	212	374	210	147	149	136	159	99	43	107
ENSMUSG00000024084.7	61	40	150	2	26	4	56	26	14	11	7	7	27	3	5	15	10	52	17	10	9	4	41	32	22	19	6	30	5	26	0	16	18
ENSMUSG00000003437.14	170	499	291	24	29	52	853	158	173	140	320	116	74	38	48	191	212	210	312	112	161	58	236	184	282	148	117	92	130	101	99	27	67
ENSMUSG00000093228.1	0	0	0	0	0	0	0	0	0	0	0	0	0	0	0	0	0	0	0	0	0	0	0	0	0	0	0	0	0	0	0	0	0
ENSMUSG00000111656.1	0	0	5	0	0	0	20	2	12	0	4	2	16	0	0	2	0	0	3	4	1	0	2	1	3	4	0	0	1	0	1	0	0
ENSMUSG00000088252.1	0	0	0	0	0	0	0	0	0	0	0	0	0	0	0	0	0	0	0	0	0	0	0	0	0	0	0	0	0	0	0	0	0
ENSMUSG00000065223.1	0	0	0	0	0	0	0	0	0	0	0	0	0	0	0	0	0	0	0	0	0	0	0	0	0	0	0	0	0	0	0	0	0
ENSMUSG00000081286.1	0	0	0	0	0	0	0	0	0	0	0	0	0	0	0	0	0	0	0	0	0	0	0	0	0	0	0	0	0	0	0	0	0
ENSMUSG00000040913.10	32	44	138	15	12	14	187	47	31	41	71	30	27	13	19	70	27	132	39	55	43	4	159	71	168	51	18	23	39	25	22	13	19
ENSMUSG00000046997.5	5	0	0	0	0	0	3	0	0	1	0	0	0	0	0	0	0	0	0	0	0	0	0	0	2	0	0	0	0	0	0	0	0
ENSMUSG00000104863.1	0	0	0	0	0	0	0	0	0	0	0	0	0	0	0	0	0	0	0	0	0	0	0	0	0	0	0	0	0	0	0	0	0
ENSMUSG00000077648.1	0	0	0	0	0	0	0	0	0	0	0	0	0	0	0	0	0	0	0	0	0	0	0	0	0	0	0	0	0	0	0	0	0
ENSMUSG00000019055.15	60	108	25	14	38	50	179	85	50	119	67	35	12	14	34	56	8	62	55	26	77	7	112	91	103	35	30	20	19	6	20	31	10
ENSMUSG00000098740.1	0	0	0	0	0	0	0	0	0	0	0	0	0	0	0	0	0	0	0	0	0	0	0	0	0	0	0	0	0	0	0	0	0
ENSMUSG00000034751.16	22	101	141	0	0	0	21	12	0	2	22	2	4	3	1	17	34	0	8	9	0	9	2	6	29	4	5	4	4	4	0	10	0
ENSMUSG00000113084.1	0	0	0	0	0	0	0	0	0	0	0	0	0	0	0	0	0	0	0	0	0	0	0	0	0	0	0	0	0	0	0	0	0
ENSMUSG00000056531.11	0	61	0	4	0	0	53	3	0	7	30	2	0	0	0	3	0	0	3	1	5	0	4	4	7	0	1	0	0	4	0	0	0
ENSMUSG00000025217.15	0	44	19	13	0	0	34	8	7	12	18	9	0	2	4	17	8	54	52	18	22	3	17	5	54	7	4	14	3	5	19	2	3
ENSMUSG00000114302.1	0	0	0	0	0	0	0	0	0	0	0	0	0	0	0	0	0	0	0	0	0	0	0	0	0	0	0	0	0	0	0	0	0
ENSMUSG00000109446.1	0	0	0	0	0	0	0	0	0	0	0	0	0	0	0	0	0	0	0	0	0	0	0	0	0	0	0	0	0	0	0	0	0
ENSMUSG00000054619.6	123	145	171	33	69	32	310	23	11	59	52	23	16	11	39	134	106	104	135	183	183	1	115	133	144	60	38	130	83	108	137	116	113
ENSMUSG00000102360.1	0	0	0	0	0	0	0	0	0	0	0	0	0	0	0	0	0	0	0	0	0	0	0	0	0	0	0	0	0	0	0	0	0
ENSMUSG00000031953.2	2	117	1	3	0	4	43	12	1	9	38	11	16	0	7	23	89	22	52	30	23	4	11	13	35	8	9	0	7	15	7	0	14
ENSMUSG00000096357.1	0	0	0	0	0	0	0	0	0	0	0	0	0	0	0	0	0	0	0	0	0	0	0	0	0	0	0	0	0	0	0	0	0
ENSMUSG00000022300.10	168	423	344	7	32	57	831	162	118	128	187	78	43	28	60	121	179	132	213	122	133	41	175	134	259	90	101	75	61	57	83	13	40
ENSMUSG00000112968.1	0	0	0	0	0	0	0	0	0	0	0	0	0	0	0	0	0	0	0	0	0	0	0	0	0	0	0	0	0	0	0	0	0
ENSMUSG00000042677.7	4	12	25	0	1	6	28	15	12	4	9	4	17	0	4	7	0	9	0	6	1	0	6	5	9	4	6	8	17	0	0	1	9
ENSMUSG00000107992.1	0	0	0	0	0	0	0	0	0	0	0	0	0	0	0	0	0	0	0	0	0	0	0	0	0	0	0	0	0	0	0	0	0
ENSMUSG00000094420.2	57	51	29	0	7	6	20	6	3	15	2	6	7	1	3	12	38	0	26	0	23	0	14	15	5	4	14	11	4	18	0	11	6
ENSMUSG00000025470.11	97	161	187	13	4	19	231	57	38	34	113	38	2	15	14	58	55	24	138	53	62	17	62	63	91	47	22	19	17	20	30	13	31
ENSMUSG00000078840.1	0	0	0	0	0	0	0	0	0	0	0	0	0	0	0	0	0	0	0	0	0	0	0	0	0	0	0	0	0	0	0	0	0
ENSMUSG00000083816.3	6	0	0	0	0	0	6	1	0	2	3	0	1	2	2	2	0	30	14	0	4	0	0	0	7	1	0	0	1	0	0	0	0
ENSMUSG00000099003.1	0	0	0	0	0	0	0	0	0	0	0	0	0	0	0	0	0	0	0	0	0	0	0	0	0	0	0	0	0	0	0	0	0
ENSMUSG00000110465.1	0	0	0	0	0	0	0	0	0	0	0	0	0	0	0	0	0	0	0	0	0	0	0	0	0	0	0	0	0	0	0	0	0
ENSMUSG00000087061.1	0	0	0	0	0	0	0	0	0	0	0	0	0	0	0	0	0	0	0	0	0	0	0	0	0	0	0	0	0	0	0	0	0
ENSMUSG00000106827.1	0	0	0	0	0	0	0	0	0	0	0	0	0	0	0	0	0	0	0	0	0	0	0	0	0	0	0	0	0	0	0	0	0
ENSMUSG00000081313.1	0	0	0	0	0	0	0	0	0	0	0	0	0	0	0	0	0	0	0	0	0	0	0	0	0	0	0	0	0	0	0	0	0
ENSMUSG00000076457.1	0	0	0	0	0	0	0	0	0	0	0	0	0	0	0	0	0	0	0	0	0	0	0	0	0	0	0	0	0	0	0	0	0
ENSMUSG00000021669.15	295	840	746	42	72	60	656	191	86	131	313	107	56	33	55	169	381	321	268	136	147	37	190	201	453	94	123	116	94	186	123	71	113
ENSMUSG00000060703.12	231	117	55	63	70	20	103	49	25	237	39	14	6	26	51	100	101	89	81	36	155	24	177	164	125	51	62	151	88	194	58	21	112
ENSMUSG00000063873.10	99	83	51	25	0	23	93	24	41	8	9	14	11	4	13	45	56	45	97	21	6	5	39	13	215	10	15	13	14	29	5	0	10
ENSMUSG00000099486.3	0	0	0	0	0	0	0	0	0	0	0	0	0	0	0	0	0	0	0	0	0	0	0	0	0	0	0	0	0	0	0	0	0
ENSMUSG00000024594.8	7	119	18	3	16	0	72	24	11	25	20	11	0	2	6	29	23	58	30	16	28	11	23	27	64	18	6	18	16	15	16	21	6
ENSMUSG00000115048.1	0	0	0	0	0	0	0	0	0	0	0	0	0	0	0	0	0	0	0	0	0	0	0	0	0	0	0	0	0	0	0	0	0
ENSMUSG00000086945.1	0	0	0	0	0	0	0	0	0	0	0	0	0	0	0	0	0	0	0	0	0	0	0	0	0	0	0	0	0	0	0	0	0
ENSMUSG00000037287.15	146	271	271	74	184	406	174	42	58	32	113	14	38	4	14	329	266	487	204	551	560	13	32	30	284	49	42	154	140	249	401	251	238
ENSMUSG00000047250.13	832	589	250	76	29	117	563	540	161	384	117	125	200	111	140	405	260	604	564	189	313	81	540	333	1352	84	149	63	86	141	77	78	31
ENSMUSG00000065733.1	0	0	0	0	0	0	0	0	0	0	0	0	0	0	0	0	0	0	0	0	0	0	0	0	0	0	0	0	0	0	0	0	0
ENSMUSG00000113111.1	0	0	0	0	0	0	0	0	0	0	0	0	0	0	0	0	0	0	0	0	0	0	0	0	0	0	0	0	0	0	0	0	0
ENSMUSG00000102507.1	0	0	0	0	0	0	0	0	0	0	0	0	0	0	0	0	0	0	0	0	0	0	0	0	0	0	0	0	0	0	0	0	0
ENSMUSG00000113594.1	0	0	0	0	0	0	0	0	0	0	0	0	0	0	0	0	0	0	0	0	0	0	0	0	0	0	0	0	0	0	0	0	0
ENSMUSG00000029177.9	115	214	190	15	5	50	1197	193	98	152	190	80	25	35	80	152	109	79	140	106	108	27	81	137	153	102	74	65	72	85	97	30	53
ENSMUSG00000031200.16	26	33	16	4	0	0	46	6	8	9	57	7	15	1	3	21	82	12	26	8	19	0	4	18	6	9	6	1	2	3	29	6	8
ENSMUSG00000109956.1	0	0	0	1	0	0	0	3	0	0	0	2	0	0	1	2	0	0	0	1	3	0	0	0	4	1	0	0	0	0	0	0	0
ENSMUSG00000084442.1	0	0	0	0	0	0	0	0	0	0	0	0	0	0	0	0	0	0	0	0	0	0	0	0	0	0	0	0	0	0	0	0	0
ENSMUSG00000026605.14	25	18	14	24	8	2	403	122	41	54	297	44	11	7	15	35	15	0	46	45	58	5	11	88	47	25	26	28	15	11	41	30	25
ENSMUSG00000100004.1	0	0	0	0	0	0	0	0	0	0	0	0	0	0	0	0	0	0	0	0	0	0	0	0	0	0	0	0	0	0	0	0	0
ENSMUSG00000040532.14	123	148	63	1	38	63	401	90	48	72	114	48	41	9	29	83	45	59	63	59	66	17	146	58	133	63	48	14	46	26	23	20	12
ENSMUSG00000094930.2	0	0	0	0	0	4	6	5	0	1	0	0	0	0	0	3	5	0	0	0	1	0	4	1	4	0	3	0	2	5	0	0	1
ENSMUSG00000089025.1	0	0	0	0	0	0	0	0	0	0	0	0	0	0	0	0	0	0	0	0	0	0	0	0	0	0	0	0	0	0	0	0	0
ENSMUSG00000082059.1	0	0	0	0	0	0	0	0	0	0	0	0	0	0	0	0	0	0	0	0	0	0	0	0	0	0	0	0	0	0	0	0	0
ENSMUSG00000105636.1	0	0	0	0	0	0	0	0	0	0	0	0	0	0	0	0	0	0	0	0	0	0	0	0	0	1	0	0	0	0	0	0	0
ENSMUSG00000041459.15	647	2159	1937	110	143	269	2008	646	359	335	1449	355	224	81	155	493	697	709	995	385	418	149	608	658	954	379	283	370	238	289	220	162	162
ENSMUSG00000098295.1	0	0	0	0	0	0	0	0	0	0	0	0	0	0	0	0	0	0	0	0	0	0	0	0	0	0	0	0	0	0	0	0	0
ENSMUSG00000000374.8	46	375	345	33	35	79	450	88	84	123	156	37	30	35	49	114	184	178	179	150	90	23	132	84	158	69	63	88	50	55	47	48	59
ENSMUSG00000092547.1	0	0	0	0	0	0	0	0	0	0	0	0	0	0	0	0	0	0	0	0	0	0	0	0	0	0	0	0	0	0	0	0	0
ENSMUSG00000054054.3	0	0	0	0	0	0	0	0	0	0	0	0	0	0	0	0	0	0	0	0	0	0	0	0	0	0	0	0	0	0	0	0	0
ENSMUSG00000099513.1	0	0	0	0	0	0	0	0	0	0	0	0	0	0	0	0	0	0	0	0	0	0	0	0	0	0	0	0	0	0	0	0	0
ENSMUSG00000064542.1	0	0	0	0	0	0	0	0	0	0	0	0	0	0	0	0	0	0	0	0	0	0	0	0	0	0	0	0	0	0	0	0	0
ENSMUSG00000087571.1	0	0	0	0	0	0	0	0	0	0	0	0	0	0	0	0	0	0	0	0	0	0	0	0	0	0	0	0	0	0	0	0	0
ENSMUSG00000088909.1	0	0	0	0	0	0	0	0	0	0	0	0	0	0	0	0	0	0	0	0	0	0	0	0	0	0	0	0	0	0	0	0	0
ENSMUSG00000090610.3	1	0	0	0	1	0	5	0	1	0	3	0	3	0	0	1	0	0	0	0	0	1	2	3	1	0	1	0	1	0	2	0	0
ENSMUSG00000103133.1	0	0	0	0	0	0	0	0	0	0	1	0	0	0	0	0	0	0	0	0	0	0	0	0	0	0	0	0	0	0	0	0	0
ENSMUSG00000063239.16	0	0	0	0	0	0	0	0	0	0	0	0	0	0	0	0	0	0	0	0	0	0	0	0	0	0	0	0	0	0	0	0	0
ENSMUSG00000074129.13	70	76	202	15	5	28	634	106	114	41	125	52	24	17	34	73	55	54	89	69	44	39	91	91	167	82	50	32	33	35	40	19	15
ENSMUSG00000035505.14	15	73	135	6	8	5	121	29	13	13	31	21	6	9	9	29	55	1	6	25	17	12	25	23	19	24	19	35	1	10	0	11	3
ENSMUSG00000029204.7	426	1466	1119	91	35	161	1648	359	306	223	1233	295	288	51	115	615	572	465	636	449	309	165	357	242	697	366	217	186	138	232	152	122	100
ENSMUSG00000085188.1	0	0	0	0	0	0	0	0	0	0	0	0	0	0	0	0	0	0	0	1	0	0	0	0	0	0	0	0	0	0	0	0	0
ENSMUSG00000113621.1	0	0	0	0	0	0	0	0	0	0	2	0	0	0	0	0	0	0	0	0	0	0	0	0	0	0	0	0	0	0	0	0	0
ENSMUSG00000108765.1	0	0	0	0	0	0	0	0	0	0	0	0	0	0	0	0	0	0	0	0	0	0	0	0	0	0	0	0	0	0	0	0	0
ENSMUSG00000083251.1	0	0	0	0	0	0	0	0	0	0	0	0	0	0	0	0	0	0	0	0	0	0	0	0	0	0	0	0	0	0	0	0	0
ENSMUSG00000101799.1	0	0	0	0	0	0	0	0	0	0	0	0	0	0	1	0	0	0	0	0	0	0	0	0	0	0	0	0	0	0	0	0	0
[truncated: 51,380 more rows]
