# Supplementary material for: Comparative transcriptomic analysis reveals translationally relevant processes in mouse models of malaria
Source: eLife. 2022 Jan 10;11:e70763. doi: 10.7554/eLife.70763 (PMC8747512; doi:10.7554/eLife.70763)
Supplement: Supplementary file 22. [file elife-70763-supp22.xlsx]

## Sheet: Key
Supplementary File 22 Reference Immune Cell Type Expression Profile for Human Microarray datasets
Description: Reference cell type gene expression profiles for immune cell types derived from GSE28490, used as the reference expression det for CellCODE for the analysis of the Boldt et al., 2019 and Idaghdour et al 2012 datasets.
Gene	Human Gene ID
Monocytes	Expression profile in monocytes
B	Expression profile in B cells
CD4T	Expression profile in CD4+T cells
CD8T	Expression profile in CD8 + T cells
Neutrophils	Expression profile in neutrophils

## Sheet: Signatures
Gene	Monocytes	B	CD4T	CD8T	Neutrophils
DDR1 /// MIR4640	4.56998	6.03128	4.99166	5.00199	5.11262
HSPA6	7.92461	5.73928	5.65258	4.0659	9.91759
PAX8	6.2388	5.97432	5.91791	5.8376	6.89684
MIR5193 /// UBA7	7.23627	7.77287	7.55265	7.43051	6.35319
THRA	4.67689	4.63713	5.02995	5.37586	4.74501
CCL5	5.63609	4.98284	9.20033	11.9494	4.15846
SCARB1	5.11717	4.76676	4.40081	4.22524	4.56708
MAPK1	6.98756	6.2546	6.18835	6.33519	7.48309
PXK	6.21419	7.29589	5.09362	5.10472	5.93727
SLC46A1	4.72572	4.31189	4.27472	4.22653	4.94633
SLC39A5	5.27773	5.23964	5.19203	5.11602	5.92993
ATP6V1E2	5.19282	5.50661	5.54462	5.49494	4.58894
PIGX	5.47361	4.35578	5.09509	5.22065	6.97568
SLC39A13	5.33187	5.61348	5.95669	6.04556	5.23785
TTC39C	5.27421	5.52736	7.03833	6.83087	4.02983
NEXN	5.23945	4.6633	4.1319	3.68687	4.11128
C15orf40	5.46178	6.81881	6.79537	6.94731	3.6062
RAX2	5.60502	5.53523	5.48744	5.44896	6.09449
MFAP3	4.94658	4.70635	4.95287	5.08469	5.5587
GIMAP1	7.51876	3.43588	8.13374	8.20858	3.56198
CCDC65	3.00361	2.97277	4.70324	5.27404	3.18138
RBBP6	6.33104	7.1128	6.9092	7.01061	6.22453
TRIOBP	6.52848	5.74331	5.6736	5.65738	6.39139
CATSPER1	6.31667	4.81247	4.97887	4.68017	5.36697
PDE7A	4.69565	7.24223	7.25198	7.31195	4.95301
CNOT7	6.10847	6.54871	6.54567	6.77166	4.8185
CRYZL1	5.843	6.11579	6.36825	6.23593	3.45331
PRSS33	4.39962	4.19818	4.29343	4.40722	5.27026
TIRAP	5.15287	4.81562	4.75517	4.84421	5.05263
LEAP2	4.70707	5.07311	5.12483	5.3099	4.40462
C4orf33	5.12229	3.84158	3.83156	3.92954	4.01939
TVP23C	4.87424	4.764	4.8092	4.77726	5.26253
FAM71A	4.77008	4.69921	4.63981	4.48101	5.15932
GAPT	6.85022	7.70801	4.85104	2.43092	5.67336
FLJ30901 /// SCUBE1	4.78269	4.54492	4.52525	4.54185	5.29715
TSSK3	5.49774	5.34011	5.35619	5.14098	6.08502
CLEC12A	9.7379	3.18847	6.38117	4.27526	5.84952
ODF4	4.42628	4.44596	4.50352	4.50277	5.04131
CLEC4F	4.93097	4.13786	4.27516	3.9927	4.73666
DEFB106A /// DEFB106B	5.57952	5.24858	5.10263	4.97776	6.7874
NEDD1	5.08518	5.73758	5.7776	6.1761	4.84445
TTLL10	4.33142	4.43888	4.18444	4.0451	4.93858
ETV3	4.67791	4.24996	4.62782	4.5618	5.14866
TM2D3	6.93085	6.20634	6.42101	6.53549	7.33249
MFSD6L	4.67601	4.53614	4.43964	4.38276	5.09256
CDH23 /// LOC100653137	4.84108	3.96187	4.28187	3.92478	4.78921
DSCR10	4.76284	4.69474	4.61402	4.42281	5.33763
ACAP2	7.83378	7.12663	7.00387	6.92014	8.19243
GAMT	5.34268	5.48272	5.60917	5.58543	5.88586
LACTB	6.90152	4.94215	5.11162	4.58887	5.46966
LACE1	3.9259	3.78792	3.9929	3.56151	5.04594
SLAMF6	4.50771	7.03329	5.93878	6.64504	4.88624
GPBAR1	7.04398	4.69218	5.65146	4.4407	5.17171
BRSK1	4.5553	4.49141	4.27783	4.23614	5.09551
CD300LG	4.92046	4.89806	4.75305	4.61148	5.615
SLC34A3	5.84373	5.7537	5.77356	5.61901	6.71383
ART5	4.55225	4.20854	4.2145	3.99248	5.12094
C21orf67	5.08594	5.13594	5.01694	4.98681	5.67518
CLDN19	5.0785	5.11813	4.99345	4.90257	5.55411
VTI1A	5.05588	4.89076	4.94449	5.08332	4.94826
TAGAP	6.19647	7.45428	7.21317	6.73363	7.88108
BSND	4.54235	4.32967	4.41533	4.23014	5.11283
CLEC4C	2.84665	3.01136	3.96491	2.67334	3.3451
NLRC4	7.57323	3.46084	4.41921	3.52732	5.45365
PRSS36	4.86327	4.68455	4.53781	4.47121	5.29461
RAI1	5.55647	5.38691	5.36586	5.45134	4.93771
AF131215.4	3.51327	4.63447	4.24239	4.53774	3.61902
RTP3	4.44228	4.31769	4.29767	4.15457	5.065
IL12RB1	5.11237	4.74345	5.44068	5.48877	5.10563
GAS2L2	4.83424	4.83709	4.78314	4.64507	5.32959
FAM223A /// FAM223B	4.55887	4.86096	4.97749	5.20298	4.9716
JAK1	7.63587	8.57919	8.5242	8.5704	8.47958
CDC42SE2	6.77357	7.6018	8.04888	8.45901	7.82723
ACACB	4.63249	4.99309	5.48365	5.47499	4.66129
STX6	6.95087	6.04995	6.20558	6.16593	6.3659
SPRR4	5.78264	5.63615	5.71105	5.54152	6.37825
HSH2D	5.11047	5.85882	4.39067	4.1972	6.31415
TRNT1	4.48496	4.88063	4.95529	5.3182	3.33847
HERPUD2	6.67257	6.83218	7.17807	7.63417	6.84804
ARSG	5.15896	3.54968	4.7271	5.00699	5.315
ATAD3A /// ATAD3B	4.65909	5.05723	5.2053	5.21482	4.45229
PHC3	6.35135	7.62582	7.43242	7.61391	5.13675
IL11RA	5.12922	5.39716	6.81564	6.51166	5.01312
TNFRSF10A	5.67055	7.04157	7.1923	6.83688	3.77427
HPS4	4.64113	5.53461	5.29089	5.42926	4.61475
UHMK1	6.32129	6.59243	6.53675	6.68832	4.75554
TXNDC2	4.44222	4.38731	4.44603	4.276	5.05962
ERC1	5.18507	5.07034	4.99581	5.10731	4.6742
FLCN	5.10911	4.91577	4.88812	5.01864	5.08982
SH2D3C	5.93522	5.84908	5.47383	5.21018	6.33749
SLC9A7	3.41261	4.90499	3.2663	3.1254	3.63145
IGSF3	4.49236	4.39322	4.29118	4.21409	5.30145
DIP2A	5.27958	5.20267	5.80908	6.31187	4.91964
USP28	4.22891	6.13187	4.06766	5.04108	3.32993
CASKIN1	4.23999	4.42416	4.27804	4.3857	4.80543
CARD16	9.77193	6.62635	7.86387	7.12078	9.86259
CEP170 /// CEP170P1	6.7736	6.55241	6.08795	5.9995	6.35645
DTD1	5.54284	5.41499	5.5066	5.54501	5.84682
CASC4	5.08857	5.43117	5.36827	5.24891	5.75673
KLHDC1	3.95706	5.19405	5.29772	5.61884	3.44755
KCNH8	2.57327	6.19791	2.51632	2.32584	2.73888
KLC3	5.04924	4.98512	4.93933	4.82679	5.65452
C9orf66	4.20375	3.98307	3.48007	3.43042	4.9741
SLC16A11	5.05327	5.4077	4.98157	4.9797	5.71918
CAMKK1	5.19268	4.99378	4.92684	4.78096	5.94689
CLEC4D	6.97858	3.41448	4.35202	3.84266	6.97939
HELB	4.26185	4.00094	5.14318	4.96022	4.32947
SEC62	7.48942	9.20634	8.0541	8.11632	6.6008
SOCS4	4.63998	4.76248	4.82656	4.8131	4.62986
TLR4	6.80546	2.9281	3.74539	2.57296	7.36997
ABHD11	5.6102	5.39495	5.29662	5.03718	6.47607
SIGLEC10	6.3258	6.18643	4.85107	3.27364	7.06814
	5.00927	5.08035	5.08205	5.01234	4.86872
B3GNT6	4.63549	4.74106	4.60794	4.61747	4.83927
DENND1B	4.46179	4.32934	4.90573	4.71989	4.52752
ZNF619	4.56106	4.53895	4.39134	4.15517	5.29256
CLDN15	5.48866	5.97858	5.94986	6.04603	5.55405
RUSC1-AS1	5.12785	5.41249	5.28081	5.38476	4.28059
CACNG6	5.39064	5.27846	5.19513	4.94576	6.13389
LMNTD1	4.26849	4.1558	4.10584	3.86389	5.02469
CIRBP-AS1	4.96957	4.90222	4.90875	4.75082	5.53385
ASMTL-AS1	5.52617	5.35366	5.24277	4.99451	6.04284
NKX6-3	5.21075	5.36777	5.00701	4.93043	5.61901
EXOC3L2	5.62929	5.52617	5.38362	5.3565	6.09208
TNFRSF13C	4.95982	6.21702	4.84377	4.55981	5.74059
CAMK2N2	4.65457	4.66049	4.55624	4.64087	4.93106
SIGLEC11	4.73089	4.0728	4.21862	4.05362	4.65437
ATRIP /// TREX1	6.70384	6.54941	6.20746	6.03325	6.12584
LOC149373	4.18635	4.20147	4.17174	3.94301	4.93126
PANX2	4.59082	4.6356	4.50885	4.44231	5.97074
C5orf17	4.14311	3.85382	4.47728	4.20043	5.53094
LINC00208	4.41027	4.34613	4.20409	4.185	4.92562
CNPY3	7.49504	6.76551	6.47227	6.23128	7.23951
SCAMP1	5.90175	5.27967	5.58703	5.59157	5.04355
IL27	4.71256	4.56565	4.38973	4.16004	4.9998
RECQL4	5.02643	4.84109	4.90427	4.84349	5.31787
GPR113	4.21212	4.22587	4.13534	4.02163	5.37502
TMC2	4.36146	4.25401	4.17268	4.07354	5.06763
KLHL4	4.07535	3.66327	3.82254	3.65672	4.97408
ASB10	5.521	5.49807	5.25593	5.25992	6.0137
HTR3C	4.29428	4.11542	4.03537	3.94276	4.96356
PIP4K2B	5.27523	5.40121	5.31633	5.38686	5.17609
SLFN5	3.38128	3.04118	5.05367	5.62982	3.02406
WFDC12	4.97335	4.74654	4.75017	4.52378	5.73945
C18orf12	4.07544	4.12236	3.94929	3.77621	4.84579
BCL2L11	6.09159	5.81607	5.85316	5.62952	6.16337
TIGD1	4.05566	4.85215	5.6354	5.67092	3.61776
ALKBH5	6.53608	6.83368	6.54355	6.72431	6.26649
CCDC69	8.05059	7.43557	7.43212	7.81986	6.30716
NFX1	4.64877	5.85674	5.28576	5.53534	4.10595
C5orf24	5.93278	5.94022	5.90659	6.1303	4.2992
NKD1	4.36196	4.38388	4.27598	4.20147	4.92823
STK38	6.50943	5.71534	6.98502	6.92281	5.42606
GATA4	5.133	5.01606	4.98002	4.9149	5.82776
TC2N	3.32908	3.65043	6.76537	6.97173	4.36594
C9orf72	6.89044	4.84872	5.42486	4.72068	6.98596
KCTD18	5.67243	5.84985	5.7122	5.77988	5.25843
SNX13	5.65181	5.51594	5.25529	5.47884	6.23457
ATP6V0D2	4.33854	4.25762	4.27307	3.85706	5.25016
CEP19	4.0455	3.9255	4.30525	4.61392	7.28249
PROSER3	5.23045	5.46843	5.53705	5.55842	5.44378
SYNRG	5.40314	6.49852	6.50632	7.01459	4.96364
GRIK5	4.84638	4.81403	4.73458	4.65214	5.37793
LRRN4	4.2992	4.18628	4.10163	3.98187	4.92542
JPH2	4.61167	4.62573	4.4975	4.35075	5.31696
SH2D1B	4.89397	3.94544	5.18998	4.43374	4.90757
SSTR3	4.92557	4.83768	4.7806	4.6906	5.50215
DDX31	4.84481	5.15491	4.94341	4.98757	5.80735
FCRL3	4.47419	9.17127	5.3925	6.1155	3.71598
C20orf166-AS1	4.54329	4.25646	4.28048	4.09736	5.00572
ZNF512	6.13127	7.34105	7.04167	7.47328	5.33131
FAM117B	5.87546	6.84035	5.98084	6.2888	4.47841
OXER1	6.01388	5.81392	5.70952	5.56924	6.71907
BRWD1	4.59162	4.85368	5.25198	5.69696	4.39548
HIPK4	4.78595	4.5952	4.57531	4.41421	5.02908
FAM124A	4.93501	4.81783	4.6391	4.57764	5.62068
POMK	4.95143	4.84394	4.9065	4.46554	5.94195
BRWD3	6.49701	5.97586	6.13034	6.18723	6.1733
ASB16	4.76047	4.58812	4.45737	4.32145	5.2793
UTS2R	5.52066	5.27081	5.31424	5.15235	5.52153
USH1G	5.28132	4.95506	4.9945	4.92613	5.70215
SYN1	4.84606	4.64088	4.63598	4.58725	5.56126
SLC36A1	5.60878	4.95339	4.85164	4.69459	5.96622
SNRNP48	5.75868	6.08852	6.09533	6.06413	5.59385
BTNL9	3.88165	5.19466	3.76072	3.54604	4.48002
ZNF555	4.22375	4.04757	4.01939	4.05944	3.61721
SGK494	5.25313	5.14723	5.34919	5.19353	4.10479
GPR128	3.70965	3.55523	3.48624	3.29783	5.27319
CSF3R	9.08448	4.12398	6.18854	4.37724	11.4837
C16orf46	4.11381	4.29793	4.11914	4.05009	4.93689
LSM14B	4.6183	4.93694	4.44503	5.10522	4.77588
SDE2	5.42172	5.35699	5.36711	5.56297	6.67076
ARID2	5.5917	5.34132	6.04971	6.02273	4.51586
FBXL18	5.27132	5.21931	5.14402	5.01279	5.8308
ANKRD23 /// ANKRD39	4.75649	4.61305	4.57026	4.45095	5.35364
FAM129C	4.44421	8.20281	4.77753	3.89804	4.51592
PARP15	2.8662	5.55766	3.98322	4.63945	2.9358
ATM	5.33728	5.92003	6.45748	6.56086	4.7143
CD200R1	4.33192	4.23395	5.02334	4.99152	4.65964
CCDC13	5.34416	5.19278	5.09885	5.06633	5.49661
CRHR1-IT1 /// MGC57346	5.13645	5.33661	5.32262	5.26554	5.76127
C5orf64	2.99928	2.9493	2.95394	2.86935	3.32745
C11orf72	4.89398	4.78026	4.84676	4.60787	5.43047
C1orf127	5.01653	4.87458	4.74293	4.62497	5.37452
VSTM4	4.2882	4.05885	4.02962	3.91485	4.71806
FLJ40288	4.60473	4.49976	4.37152	4.34667	5.28397
CHDC2	4.0224	3.90347	3.93472	3.82414	5.08223
TDH	4.55435	4.71815	4.70308	4.58138	5.13482
SERPINA9	5.02398	5.00596	4.72667	4.66564	5.77324
FBXL21	4.16663	4.14294	4.07789	3.89657	5.20216
GPR6	4.3186	4.15222	4.02463	4.08643	4.91137
RQCD1	5.49893	5.71363	5.74574	5.94901	4.70386
NLRP9	3.91628	3.68891	3.71783	3.54875	4.72575
TAF5	5.25029	5.09456	5.05723	5.24781	4.07326
RANGAP1	5.38245	5.11768	5.45359	5.30796	5.13688
CCDC125	4.08724	4.00324	4.05147	4.16073	5.59938
MACROD2	3.42754	6.2042	3.33501	2.98825	4.09531
CYGB	4.94717	4.80196	4.78569	4.69743	5.53226
THRSP	4.48525	4.44271	4.26007	4.18422	5.03388
FBXL19-AS1	4.76139	4.52195	4.46384	4.54624	4.97891
INSL3	5.9142	5.99139	5.98753	6.02683	6.25952
MUCL1	4.33717	4.01118	3.79279	3.8559	5.2149
ATL2	5.26093	5.66515	5.47899	5.6788	5.22032
PPARGC1B	5.18728	4.47351	4.37974	4.45176	4.09931
XKR6	4.17778	4.72587	4.47253	4.29756	5.2392
C9orf163	4.83184	4.82662	4.77486	4.47864	5.32268
CDYL2	4.92661	4.67124	4.80169	4.51123	6.02771
VWA3A	4.53923	4.43542	4.43123	4.29899	5.16629
NPB	4.98588	4.70573	4.68626	4.75416	5.12145
TIPRL	6.2399	6.02433	6.59386	6.6505	5.98409
PRF1	5.30958	4.93493	7.14709	9.54983	5.35027
SP1	4.95243	4.1788	4.05612	3.86221	4.76183
C18orf25	4.56216	4.52224	4.76389	4.708	5.50965
METTL6	4.60183	4.78914	4.79279	5.13338	4.16007
CBR4	5.60334	6.15408	5.65841	5.92107	4.87627
PIK3C2A	5.4049	5.56943	5.32629	5.6287	4.23982
NLRX1	5.88623	4.96887	5.25116	5.33714	6.02496
DUSP18	5.72681	5.52633	5.42016	5.38802	5.8194
ZNF791	5.79567	7.07359	6.26475	6.84996	4.7301
LINC00525	3.68834	3.90954	3.61898	3.24777	4.31974
RHEBL1	4.18229	4.42333	4.31093	4.556	5.00152
FAM195A	6.36169	5.72993	5.85901	5.90974	5.10075
KCTD7 /// RABGEF1	5.07906	6.02898	5.59274	5.81069	4.95739
ZNF548	4.8127	5.87571	5.5626	5.95714	5.01205
GPR97	3.79504	3.68101	3.84461	3.96562	7.79239
B4GALNT3	5.19174	5.18173	5.05036	4.90531	5.52149
LRRC43	5.93253	5.78262	5.73118	5.69376	6.58744
METTL21A	4.71842	5.33336	4.63819	5.07833	3.19118
NXNL1	5.11297	5.03395	5.11343	4.97477	5.51175
LINC00638	4.4507	4.67172	4.381	4.38162	4.91854
RASGEF1B	4.6932	4.62144	4.16054	3.80261	5.1007
SPATA32	4.78656	4.66746	4.61451	4.4964	5.5542
PRR35	4.84059	4.87695	4.72987	4.74769	5.41968
CCDC149	5.10451	3.88032	3.87748	3.73461	4.61295
P2RY10	3.46445	8.4177	6.28728	6.50096	5.67228
IGSF22	4.95732	5.58895	5.53627	5.49749	5.58387
CSNK1G2-AS1	4.55513	4.46146	4.37835	4.3326	5.29618
NATD1	5.44709	4.61381	4.76591	4.78388	6.4417
ZNF99	3.1943	2.91985	2.97037	2.6745	4.62938
CCDC108	3.42783	3.63874	2.99761	2.87798	4.18194
FGD2	7.15878	7.46265	5.55478	4.5621	5.31024
FAM178A	5.2562	5.39583	5.37967	5.49347	4.65907
PIKFYVE	5.81348	6.54739	5.73506	5.81559	5.66164
C9orf62	4.18077	4.05512	4.09612	3.99236	4.54762
ELMOD2	5.3268	5.05004	5.14699	5.47767	5.9791
NS3BP	4.89002	4.72256	4.60725	4.63392	5.19941
EXOSC6	5.32161	5.77874	5.93552	5.9932	4.54336
IQSEC3	4.33362	4.20856	4.11118	4.06068	5.20057
ZDHHC19	4.88556	5.25472	4.87445	4.79196	5.31852
ALG14	4.60351	4.80938	4.49781	4.78179	3.14421
PPP1R21	6.19178	6.30542	6.20933	6.28841	5.85682
B3GALT6	6.30982	6.45369	6.22756	6.44148	5.27485
SNX21	4.79613	4.30454	4.35305	4.29952	5.06623
RHOB	6.25647	5.30854	5.40874	4.63714	6.96359
GATS	4.38722	5.22465	4.63077	5.01199	5.33062
DPCD	5.28813	4.43087	4.55408	4.48074	4.70897
DTYMK	4.99721	5.27113	5.22621	5.39126	4.50289
MAPKAPK5-AS1	6.15847	5.73279	6.9197	7.05564	3.46233
BRICD5	5.25263	5.22002	5.40266	5.32527	5.40351
NBR2	4.46865	5.03266	4.57315	4.65643	4.12991
MED25 /// MIR6800	7.11058	7.38686	6.43779	6.30756	9.32497
ASPHD1	4.6728	4.72252	4.53549	4.43282	5.34544
DMRTC1 /// DMRTC1B	4.51278	5.18472	4.8655	4.85138	5.14858
LLGL2	4.65893	5.01762	5.34007	5.72376	5.15001
NDST1	5.54776	4.67005	4.6519	4.33064	5.80523
CHD2	5.6009	6.6368	6.62983	6.61202	5.86555
USB1	6.42175	5.63895	5.84068	6.08388	7.17191
ZNF12	5.93125	6.7699	6.70701	6.89432	4.58771
ZBTB24	4.94026	5.38394	5.22689	5.3158	3.66546
LARP1B	5.14022	4.97722	5.17176	5.125	5.48922
C14orf159	6.77364	6.36384	6.35166	6.30887	7.56108
SMPDL3B	4.78998	4.57947	4.35925	4.36201	5.3204
CNOT1	6.00705	6.25944	6.05745	6.23433	5.941
ASH1L-AS1	5.95756	6.07431	6.35384	6.35353	6.46597
SETMAR	3.89613	3.75632	3.62066	3.6207	5.02585
C12orf66	3.76541	4.62189	4.55274	4.76543	3.36868
SLFNL1	4.95522	4.89483	4.7867	4.55558	5.47441
TMEM53	4.59806	4.63673	4.50565	4.40508	4.71496
DNAJA3	6.62481	7.37157	7.35709	7.42687	5.53141
NOL9	5.9092	6.36035	6.59619	6.60331	5.15272
DDX51	4.86173	5.76167	5.54656	5.99809	4.21461
TUBGCP3	5.76132	5.29591	5.14618	5.17549	4.96784
SBDS /// SBDSP1	6.13665	7.02738	7.92927	8.02737	4.71637
SNAPC5	6.52035	6.5564	6.92661	7.15484	5.50429
RBM33	5.53753	5.62746	5.70258	5.71961	5.88112
MIR31HG	3.98158	3.98154	3.89109	3.78533	4.76977
TMEM185A	4.89025	5.05213	5.09718	5.38377	4.56457
ULK2	5.33653	3.65716	4.75848	4.80532	3.82317
SLC4A8	4.43628	4.08777	4.01431	3.93672	5.15527
SSH2	5.54312	4.57742	4.79729	4.4559	8.07387
C5orf58	3.9951	3.97933	3.96981	4.05649	4.82252
PARP11	4.65035	5.62901	5.91314	5.92168	3.61958
CCDC60	4.7658	4.83349	4.68078	4.60596	5.13052
MSRB3	4.36237	4.19069	4.28362	4.50702	5.06791
ADIG	4.36623	4.39305	4.19963	4.20331	5.16626
CCSER2	4.66754	4.84941	5.94762	6.59248	4.62323
CLDND1	6.2729	5.98602	7.22151	7.67417	5.08651
OGDH	6.15902	5.59178	5.8139	5.78081	5.85548
PHF21A	6.10361	5.87431	5.49557	5.4491	6.54625
GDAP2	5.85513	5.36563	5.20013	5.26774	5.51102
ZNF446	5.42043	5.53931	5.49585	5.51151	6.00378
GOLGA7	7.37404	6.54656	7.69317	7.60811	8.03081
SH3KBP1	8.56054	7.62637	8.66762	8.59203	8.48381
MBLAC1	4.80297	4.82123	4.79162	4.87912	4.95416
ZMYM3	4.9942	5.15943	5.07132	5.16311	4.61942
CD300LB	6.207	4.58588	4.81393	4.4232	5.88961
FAM126B	5.84417	5.54614	5.93576	6.19301	7.20305
TRIM73 /// TRIM74	4.33565	4.71551	5.21338	5.12091	4.76445
LOC554206	3.71793	3.7479	3.91817	3.49096	4.70643
C11orf53	4.98649	4.95488	4.9507	5.05795	5.2151
TRMT44	4.96047	4.89181	4.73682	4.78767	5.23625
SH3YL1	4.87407	5.90421	6.40433	6.36996	5.03443
CABP4	5.13764	5.31553	5.23483	5.0907	5.57081
MEI1	5.65969	6.30842	6.68342	6.82282	5.71561
KCNS2	4.64431	4.4621	4.45413	4.24952	5.62064
ARHGEF10	4.33207	4.7002	4.79686	4.44677	4.90637
BC027448	4.04066	3.97203	3.89101	3.76804	4.91742
MGC45922	4.49406	4.62066	4.43445	4.39446	4.95293
LOC101929497	3.88332	3.89582	3.71099	3.52686	4.78428
CREBRF	6.69706	7.14553	7.32871	7.34347	8.23766
SDCCAG8	4.99274	4.59765	4.60558	4.51675	3.8361
ZADH2	5.86706	5.59904	5.97561	5.94398	4.89753
ITGAL	8.92853	6.68687	8.84091	9.25132	7.94552
COCH	3.97968	5.78519	3.89186	4.01668	3.93205
ZNF638 /// ZNF638-IT1	6.11004	6.3292	6.52384	6.52404	5.20504
STAG3L2 /// STAG3L3 /// TRIM73	6.10912	7.07491	7.75209	7.97702	4.62604
HP1BP3	7.63183	7.96456	8.03457	8.16258	7.10902
CERS3	4.0727	4.09042	4.0631	4.0177	5.04142
GPSM1	4.98271	4.93996	5.08401	4.97929	5.49118
FRYL	5.78118	6.23542	6.25415	6.44128	5.54652
HAVCR2	5.97898	4.16248	4.81726	4.73307	4.33269
TRIM4	6.45201	6.64568	6.74385	6.88506	4.1761
SVOPL	3.86168	3.72658	3.88719	3.91367	4.93119
ITPKB	5.11433	5.75024	6.94535	6.8382	5.00583
RNF170	4.76684	5.00989	4.79079	4.77824	3.96992
PGLS	7.50742	6.71506	6.72868	6.52834	6.38623
DNAJA4	5.24797	5.14495	5.53887	5.52215	5.50202
CYTH4	6.26986	5.68281	5.84406	5.96445	7.35892
HELQ	4.7399	5.57619	5.25967	5.34219	4.32771
STAP1	3.52144	8.62662	4.72083	3.26946	3.50005
AQP12A /// AQP12B	6.03506	5.8798	5.8969	5.71808	6.6193
GIN1	4.41381	5.10524	5.24541	5.44105	3.92088
GNB5	4.43412	6.31169	5.49795	5.58386	4.42526
DENND4A	5.20893	6.11011	5.08712	5.59396	4.07251
SIAE	4.73578	4.50731	4.65953	4.33659	4.96479
FCHSD2	5.77869	6.73646	5.15581	4.92952	5.53631
PPP2R5C	6.89198	7.14568	7.96161	8.2575	7.03143
PTPLA	4.62858	4.42981	4.49258	4.31766	5.1342
TP73	4.41605	4.21072	4.22109	4.20187	4.72673
PADI2	4.41832	4.04325	4.15665	4.11433	5.37362
AZIN2	4.25178	4.28793	4.60002	4.66173	4.84703
UEVLD	4.80791	4.07333	4.01548	4.13773	4.20581
CLEC7A	9.00573	2.88035	5.99652	2.75242	10.2705
WBSCR16	5.20963	5.44055	5.33499	5.37251	4.47301
CTNNB1	5.23651	5.18181	5.25584	5.26684	4.6624
SNX29P1 /// SNX29P2	3.05227	6.44739	2.65548	2.60536	2.64033
OSGIN2	4.78409	4.23806	4.22033	4.4213	5.81218
APH1A	6.23197	6.52913	6.11703	6.42111	6.42746
ATF3	4.58343	4.14228	4.31869	4.00258	4.76915
FBXO7	6.6174	6.68843	6.75113	6.87567	4.89495
FIP1L1	5.08934	5.50855	5.52841	6.01199	4.79846
NLGN2	5.56827	5.37699	5.34209	5.32252	6.04497
DMWD	5.21851	5.51109	5.22935	5.20479	5.84642
SMIM11	4.83623	5.27911	5.29354	5.52805	4.75167
ZNF146	5.77621	6.52119	6.38463	6.56804	3.76079
WAPAL	7.01687	6.78672	6.98669	7.20308	6.69968
BEST1	5.75344	4.72425	4.66761	4.49302	6.86797
JPX	6.17608	6.72184	7.03715	6.98364	5.25913
MIER3	4.14143	4.84761	4.60123	4.91963	3.43598
LINS	4.31164	4.69065	6.35719	6.37606	3.99509
DNAJB9	4.45616	5.13279	5.28846	5.30636	5.29171
CRTAP	7.29285	5.15797	5.74692	5.30098	4.57951
KRBOX4 /// ZNF674	3.53927	4.29429	4.0727	4.48438	2.93983
C16orf13	6.27736	6.03637	6.35648	6.35889	5.30312
ZBTB44	5.72583	6.58511	6.32985	6.77687	5.31717
ANKRD13C	4.67236	5.16897	5.12763	5.54753	3.53438
PHF20L1	5.89604	5.39568	5.56111	5.7411	6.4183
MOXD1	3.88199	4.4525	3.74296	3.56536	4.7031
C19orf47	4.9007	4.76649	4.73853	4.66499	5.41751
ZNF808	4.73137	4.86324	4.80633	4.81268	4.65971
EPB41	6.13208	7.11152	7.50454	7.54499	6.95432
SAR1B	5.88335	5.08935	5.53305	5.68562	4.48255
TMEM37	5.37399	5.20145	5.10752	4.94219	6.16506
ATF6B	5.52423	5.85667	5.66758	5.82159	5.63095
TSC22D4	6.16679	5.85922	6.06201	6.33314	6.91143
OSCAR	7.51107	3.36016	4.49494	3.57408	6.06907
PIK3AP1	7.82019	7.95104	5.92457	5.14189	7.24088
GHITM	8.71249	8.07732	8.35772	8.41154	8.36892
GSTCD	4.35107	4.34924	4.43937	4.15633	5.18348
TTC12	4.444	4.93163	4.8149	4.71786	4.85081
DPYD	7.13219	4.32498	5.61871	5.29273	5.97851
RHOF	5.14172	6.01385	6.37129	6.76831	5.36291
SLC25A48	4.18892	4.20333	4.03459	4.05279	4.6494
MBP	6.71423	6.27568	6.83739	6.9537	7.8938
YIF1B	5.03363	4.47351	4.5818	4.61615	4.82501
SETD6	4.83109	5.54997	5.99743	6.28475	3.6609
GPR62	4.7184	4.61626	4.48283	4.38186	5.37921
SPPL3	6.27283	6.36343	6.26613	6.29597	5.84103
KCTD17	5.09475	4.95624	4.91966	4.94597	5.39367
CELF2	7.54638	7.62533	7.96207	7.98886	8.2345
APBB1IP	6.72804	6.45374	6.7217	6.76684	7.36865
CYB5R3	6.83222	6.67908	6.30852	6.25044	5.87685
ZNF70	4.45531	4.38436	4.22176	4.29134	4.9863
RHOBTB2	4.6291	5.91366	4.39358	4.31388	4.77175
ARHGAP27	5.82073	4.89108	4.9094	4.64175	6.49352
SYMPK	5.61486	5.55473	5.51005	5.49219	4.98922
CEP120	4.38351	6.04771	5.50336	5.92772	3.41501
KIAA0226	5.96243	6.42298	5.89974	5.93937	5.35422
SERPINB8	5.09083	4.01656	4.01676	3.78181	4.51552
BCL6B	4.56131	4.4947	4.37468	4.36413	5.00777
ASCC1	5.45761	6.1434	5.63233	5.99501	4.82151
TET3	6.3552	5.31715	5.33589	5.21335	5.92668
RNF32	4.50363	4.43347	4.39532	4.07371	5.58496
RP3-412A9.16	4.44252	4.00532	4.11144	3.86694	5.16325
CNST	4.7767	6.1423	6.41595	6.313	4.57363
LOC100130950	4.4448	4.52733	4.20198	3.94768	4.9883
GGA1	6.72424	6.77793	6.60449	6.80532	6.11094
SRRM2	7.61714	8.12848	7.77948	7.92973	7.2828
SRGN	10.5463	5.88094	9.27988	9.06612	11.9443
HNRNPDL	8.4697	9.26502	9.24413	9.32522	6.25075
TACC1	6.51028	5.80971	5.96824	6.10036	6.16752
PACSIN2	6.69984	5.96316	6.08004	5.6162	7.90208
TAF2	6.23013	6.34215	6.30541	6.4752	5.38221
MCTP1	6.1438	3.2319	3.99589	3.27144	4.78876
IPP	3.44685	4.67679	4.6371	4.93989	3.89598
SEPT2	6.24947	6.07462	6.09216	6.22336	4.96862
CLCNKB	4.50429	4.543	4.38625	4.41127	5.17642
MAD2L1	3.45845	3.88728	5.06464	5.72058	3.83348
KLHL30-AS1	4.91236	4.93739	4.78577	4.71991	5.59113
CASS4	3.72499	3.34475	4.11802	4.46541	6.30276
SNED1	4.68695	4.61467	4.5655	4.61923	4.93167
FBXO8	4.68531	5.20521	5.28087	5.55713	4.42384
UBE2O	5.67013	6.34036	5.84094	5.82574	5.82898
ASTN2	4.09891	4.19458	3.7311	3.80569	5.33418
ITGA11	4.7937	4.81424	4.58826	4.52361	5.27031
PHTF2	5.37189	6.40257	5.94567	5.43416	4.47657
ADCY7	7.07116	6.09013	6.60348	6.56653	5.99452
MCTP2	4.05828	5.48419	4.13192	4.70803	6.60409
RASSF5	7.10575	7.07637	7.66676	7.84929	8.11628
B3GNT5	5.84008	4.04516	4.59776	4.18749	7.8246
SLC12A1	4.28518	4.22677	4.0612	3.95916	4.94331
ELMO2	5.01542	4.50771	5.02104	5.11672	4.97652
PTPN7	4.49857	4.64067	5.21987	5.47012	4.89843
DOK5	4.47063	4.42224	4.29578	4.1345	5.23601
TMEM135	4.39626	4.07234	4.35117	4.54595	4.92842
S100Z	7.20194	3.65639	4.57977	3.32351	4.40782
ABCD3	6.03022	5.63648	6.03919	6.33107	4.49249
DKFZP434K028	4.80251	4.83637	4.61223	4.58143	5.07833
TIA1	6.63866	7.40046	6.99303	7.24418	4.74295
MS4A3	3.0199	3.03859	5.18072	5.99111	3.66496
FCER1G	10.9019	3.72821	8.60783	5.60942	9.53986
FRMD8	4.81085	4.63714	4.67199	4.6278	5.76636
ABCC11	4.10702	3.90914	3.72301	3.72535	4.87085
C7orf63	4.66821	4.55546	4.62348	4.22527	6.06347
EXOC3L1	5.10539	4.71982	4.65095	4.70786	5.38053
ACAT1	5.23212	5.10783	5.44415	5.21961	4.55645
NLRP12	7.61892	4.41754	5.22826	4.37569	7.42637
C21orf90	4.46556	4.46128	4.27089	4.23697	5.14302
ZNF641	6.07474	5.38211	5.58681	5.79188	6.5152
ACY3	4.72388	4.61651	4.52135	4.45262	5.10073
PTGS2	4.42188	2.70298	3.95172	2.64355	9.81193
WDR66	3.37626	3.35374	3.30345	3.1787	3.55629
IL16	5.69935	6.44584	6.26198	6.3661	6.2069
ARHGAP20	4.12751	4.15803	3.78924	3.60437	4.9204
SCARF1	5.21201	4.49881	4.55639	4.33282	5.83669
LINC00612	3.24946	3.12552	3.38822	2.98832	4.98875
NAGA	7.9507	4.7924	5.98875	4.91033	4.76027
SYT9	4.21791	4.1069	4.02594	4.00427	4.86681
CCNG2	5.99572	7.00571	5.42457	5.31737	7.20152
LPGAT1	7.03694	6.5433	5.80804	5.72712	7.18086
IKZF2	3.83367	4.68725	5.13707	5.49608	4.94013
KCNH5	3.94966	3.5674	3.77688	3.64783	5.97268
ARHGAP25	6.40697	7.0082	6.61729	6.85458	8.47216
ZNF843	5.04261	4.96519	4.88338	4.6619	5.65413
RPL13AP17	4.75439	4.78007	4.84207	4.67731	5.42726
STAT5B	6.38888	6.09455	7.06009	6.6908	7.65941
STPG2	3.78068	3.77696	3.63075	3.62275	4.81784
MIER1	5.24733	4.93973	5.28535	5.39775	6.21101
SLC11A1	6.96597	3.84535	4.55434	3.60897	6.74557
CD96	2.808	3.55615	5.75417	6.6773	3.24962
GPR125	2.97381	2.95505	3.30027	3.32831	3.86262
PAXBP1	6.06992	6.13375	6.29752	6.53688	4.04875
PER3	4.29659	4.04989	4.37362	4.39136	4.29258
ARL17A /// ARL17B	4.16568	4.27225	4.04959	4.0627	4.84223
QKI	7.28204	5.28853	5.55442	4.95735	6.64637
KIF26B	4.43207	4.41676	4.33846	4.28826	4.90328
PGPEP1	5.34335	5.08969	5.18703	5.36737	5.15162
NAMPT	7.40192	4.19831	6.41759	4.41941	12.1835
IGHV7-81 /// IGHV7-81	3.58151	3.76386	3.62863	3.2999	5.12495
ST3GAL3	5.58985	5.62624	5.65061	5.57603	6.12146
ZNF277	6.00475	5.54218	5.96261	6.13185	3.87046
C1orf43	8.87089	7.86759	8.20389	8.01469	7.59325
PTH2	5.26884	5.13795	5.12633	5.20577	5.61834
C8orf59	6.58106	6.96037	7.06872	7.3225	4.13234
RAPGEF6	5.93264	7.20952	8.42075	8.37627	6.34326
COL25A1	3.42554	3.49469	3.09595	2.86057	4.22452
ZAK	5.76312	4.24251	4.20051	3.6584	4.03901
GRID1	4.58213	4.55558	4.58349	4.52007	4.79703
CKAP5	5.56596	5.60884	5.61838	5.92166	4.36876
ARMC8	5.11405	5.16735	5.29205	5.50454	4.83493
FBF1	4.9258	5.22296	5.11105	5.25988	5.47094
ECE2	4.5881	4.63194	4.52527	4.44009	4.89662
PAK6	3.93045	3.82075	3.81765	4.2209	4.63541
ZNF26	4.81678	5.51429	5.15335	5.59477	3.85446
ADAM9	5.04542	3.55756	3.89057	3.47448	4.67358
SLC30A5	5.52279	5.41765	5.48314	5.85944	3.79932
MEGF10	4.19318	3.84664	3.79869	3.51063	4.91456
TFAP2E	4.82999	4.74077	5.01226	4.97618	5.16094
ITGB2	9.8965	7.1016	8.43651	8.17881	9.55384
PPHLN1	6.04752	6.70601	6.69194	6.87993	5.01858
ETS1	4.37247	6.97657	8.02422	8.06891	4.34112
PIGQ	5.10166	4.89879	4.83449	4.71498	5.67558
DNAJC11	5.23025	5.18479	5.23334	5.09778	5.2011
LINC00663	3.68973	4.79178	4.9884	5.50933	3.89034
BAGE	5.18608	5.02169	5.09405	4.22756	6.1999
CAMTA1	6.14328	5.87728	6.04602	5.99927	4.64658
DBF4B	4.93681	4.85778	4.6415	4.57331	5.53059
FAM159A	3.5949	5.55526	5.30407	5.3303	4.06089
ADAMTS4	4.24203	4.23551	4.09199	4.10171	4.80678
SNX25	3.25516	6.17921	4.32609	4.81358	3.41607
DUSP16	4.73151	4.61959	6.22573	6.03301	5.86395
DUOXA1	4.59638	4.58549	4.39447	4.40562	5.18692
FGD3	6.4584	6.50662	6.96975	7.13921	7.83834
BAGE2 /// BAGE4	4.73304	4.61883	4.75696	4.86981	5.76166
CCNL1	7.78289	7.90492	8.46812	8.37812	8.17921
ASAH1	9.61162	7.32274	7.63088	6.73218	9.56803
OTUD5	5.8942	6.4365	6.29627	6.35213	6.60134
SYNCRIP	6.9361	6.58162	6.84847	7.05145	4.92638
TRAPPC10	6.0835	6.4977	6.55675	6.5465	5.85714
GPR114	4.1745	4.89003	4.33438	4.75707	4.51219
NAA16	5.68983	5.48529	6.79404	7.64466	3.9134
RALGPS1	4.50174	5.56257	4.69894	4.8577	4.51516
SLC39A6	5.82543	5.99004	5.87105	6.0821	5.26649
MCOLN2	4.439	5.85951	5.41398	5.67983	4.85869
CELF1	6.73213	6.66279	6.61588	6.57639	6.42349
CLASP2	5.17311	5.06311	5.04357	5.11632	3.71608
PPM1F	7.39376	6.06511	6.465	6.13943	7.83588
TTLL3	4.76227	4.67232	4.64424	4.52129	5.06966
IREB2	5.00827	4.7875	5.03382	5.08449	3.76368
C17orf82	4.8952	4.79395	4.78951	4.68748	5.51872
PRR5L	4.11013	3.63558	4.56162	5.76892	4.29358
PDZD3	4.67726	4.65729	4.51542	4.49823	5.44179
C19orf66	6.55472	6.92511	7.11405	7.42883	6.23785
CWC27	6.7885	6.72795	6.98513	7.25743	4.02363
IFNLR1	4.44276	5.64143	4.56671	4.78355	4.83748
SLC2A4RG	4.64661	4.73703	6.44872	6.71295	4.28264
PIAS2	5.28901	5.32502	5.29103	5.43739	6.48194
FYCO1	5.40151	5.14649	5.3247	5.668	4.64774
SEPT6	5.91772	8.02831	8.33426	8.42376	4.42318
SDS	4.01618	4.00733	3.95056	3.81745	5.10165
POFUT2	5.33422	5.50835	5.58281	5.63611	5.917
NDUFA10	6.12108	6.06928	6.02106	6.07694	5.64748
SLC22A7	4.6299	4.55115	4.45603	4.37543	5.00488
ZCCHC7	5.47299	8.13651	6.44291	6.60549	4.86124
TAPBP	5.26414	6.03415	5.37313	5.63502	5.85859
KDELR1	7.18864	6.07794	6.31187	6.21382	5.09399
PTPRM	3.68884	3.56477	4.8666	5.34517	3.86506
GATA1	4.45081	4.37518	4.30908	4.28825	4.85371
MBNL1	8.18804	8.47758	8.8813	8.85614	7.44072
ZAP70	4.15514	4.25612	8.3324	8.7713	3.94942
SUGT1P1	4.8165	4.45249	4.72509	4.54277	5.58277
SAE1	6.51098	6.5408	7.41759	7.45068	4.76461
PTGIR	6.16779	5.38957	5.59445	5.22437	5.78857
NARR /// RAB34	7.20947	5.1339	5.55429	4.89611	4.11042
PIK3IP1	5.53615	6.658	7.92762	7.90863	5.0468
LILRA5	7.46832	3.64802	5.34587	3.44816	6.60828
SAMSN1	6.43466	4.69705	6.09842	5.71327	6.39861
GAFA2	4.59828	4.50946	4.51877	4.26949	5.23395
RTN4IP1	4.24533	5.09869	4.41535	4.65549	3.3856
OTUB2	4.36423	4.22841	4.01896	4.0368	5.41992
KLRC4-KLRK1 /// KLRK1	4.75413	5.95883	6.14498	11.0076	4.60452
KCNIP3	4.649	4.6674	4.48386	4.4701	5.28546
CLRN1	4.38932	4.02575	4.01392	3.94755	4.95138
KLK4	5.13118	4.9477	4.91183	4.7631	5.88556
CMTM3	8.06779	4.98044	7.4241	7.42936	7.03662
HRH3	4.89999	4.99304	4.91529	4.90158	5.34697
BAP1	5.81276	5.56802	5.67701	5.72587	5.9391
AGTRAP	7.82902	5.08834	6.15288	5.92618	7.3912
LYZ	13.0094	5.59326	10.7989	8.91296	10.7968
GEMIN7	6.38297	6.60245	5.68285	5.80133	5.40625
ATN1	4.93995	4.96918	5.12322	4.91768	5.48111
RBM15	5.5614	6.37068	5.85535	6.05293	5.0995
TIMM10	6.79061	6.85416	6.79851	6.92181	4.99748
CD79A	5.30063	10.0668	5.24758	5.07548	4.86304
PQLC2	4.57169	4.16114	3.87982	3.78709	3.62368
IRAK1	4.5644	4.43641	4.0432	4.07214	4.5177
LINC00520	4.35288	4.05284	4.04854	3.7586	4.85127
PHF23	6.12784	5.8886	5.68531	5.9134	6.63474
TMEM192 /// ZNF320	6.48096	6.7514	6.10246	6.40644	4.23817
CCDC116	4.33468	4.40927	4.2816	4.16479	4.97485
ZFP82	3.45048	4.92921	4.22882	4.63227	3.53069
ARPC5	9.0221	7.88699	8.48652	8.40681	9.9092
C11orf57	5.67421	5.66247	5.58558	5.73967	4.44734
ARHGDIB	10.4053	10.2613	10.3427	10.5734	11.1928
RHOA	9.70036	9.01917	9.03796	8.86177	10.0317
L3MBTL2	5.66126	5.92228	6.0218	6.09874	5.48111
PACS2	5.93285	5.38419	5.84544	5.61206	5.53987
ESYT2	5.60165	4.69562	6.49477	6.9127	3.86523
LRRC41	5.56984	5.39511	5.3757	5.44531	4.47332
KLF6	8.36681	7.52289	8.36849	7.82902	8.80857
IRGQ	5.81299	5.5781	5.55976	5.58298	5.42788
POLR2B	8.74713	9.00778	8.93964	9.18557	7.96811
MSANTD3	3.97222	5.16485	5.24911	5.71014	4.04048
CYTH2	5.48349	5.09014	5.58404	5.48985	5.71958
HNRNPM	6.64556	6.64074	6.89949	6.70216	5.89591
LOC284454 /// MIR23A /// MIR24-2	7.25829	5.11892	5.87662	5.45502	7.65287
SEPW1	7.98593	7.07751	8.60985	8.59081	5.05712
THUMPD3-AS1	5.41605	6.27412	6.02166	6.07327	5.12653
PDHA1	6.58654	6.53937	6.61872	6.8803	4.43089
TTC28-AS1	4.99098	5.35204	5.61197	5.75615	5.28343
GLIDR	5.01428	6.41804	4.93438	5.1757	4.84135
RPS24	4.34566	4.99004	5.0124	5.56409	3.5679
LZTS2	5.02133	5.53526	5.40547	5.37833	5.09585
SPIN3	4.58115	5.20886	6.04845	5.7173	3.64784
PDSS2	5.41439	5.63356	5.49771	5.79103	3.5248
PSMD5-AS1	4.84481	5.93264	6.41111	6.32007	3.80832
DNM2	5.91316	5.45115	5.61389	5.66303	5.93282
ADAM15	6.07142	5.32824	5.39924	5.21469	5.82477
TCAIM	5.64841	4.96044	5.28509	5.42484	4.69456
GON4L	5.88624	6.39552	6.52717	6.63824	5.44289
RPUSD3	5.21952	5.20514	5.25222	5.25842	5.48055
CBX3	6.13351	6.3648	6.93174	6.92778	4.98976
CASC10	5.30559	5.19865	5.10859	5.12478	5.45881
KIAA2013	5.79249	5.54935	5.24271	5.38349	5.81825
VIM	9.63044	7.83333	9.01995	8.50652	8.50699
FAM120A	5.02472	4.93917	4.7466	5.00683	5.0687
CD55	9.25298	8.74712	8.34417	8.37775	10.16
LOC101928717 /// SLC19A1	5.14103	4.40889	4.65999	4.51147	6.63556
HINT1	8.78188	9.77891	9.99241	9.98634	5.9411
B3GNT7	3.28481	4.39992	3.4998	3.47605	3.62053
FBXO28	6.03648	6.40477	6.04118	6.27708	5.69292
MYL12A	4.04928	4.78878	5.31133	5.50096	3.76605
LOC100130417	4.39939	4.21913	4.12861	4.07206	4.96199
ASB16-AS1	4.66142	5.34611	5.2881	5.3384	4.59202
C22orf42	4.15885	3.97723	4.03873	3.66593	5.60828
EIF4A2 /// MIR1248 /// SNORA4 /// SNORA63 /// SNORA81 /// SNORD2	4.53712	5.64813	5.67081	5.81783	2.97069
ATP5H	7.33034	6.91545	7.46626	7.45617	6.58383
BTBD7	6.45577	6.43336	6.23705	6.37061	5.1239
LOC284939 /// MAPK8IP2	5.86822	5.68804	5.69727	5.46802	6.44649
CSNK1A1	5.77853	5.36397	5.72667	5.72617	4.87029
MESP2	5.09861	5.03339	4.88637	4.7187	5.73215
NBEAL2	6.34926	5.02744	5.87139	5.7552	6.90637
SMTN	5.09117	4.92523	4.8485	4.68507	5.6003
MTMR11	7.21183	3.28959	4.84581	3.24537	3.76953
ZNF207	6.1186	6.20735	6.34454	6.44987	4.76162
TTN-AS1	4.34781	4.83718	5.0823	5.04089	4.72913
LINC00599 /// MIR124-1	4.73084	4.72617	4.61676	4.41523	5.56253
MAGEE1	3.93619	5.06235	5.06632	5.57907	4.44407
RTN4	9.65538	8.04525	8.77253	8.6743	9.03261
BICD1	4.1518	5.24866	4.53438	4.6195	4.50171
DNAJC7	7.09503	6.85152	6.83115	7.01957	5.51182
SPEN	6.94485	7.24916	6.83049	6.92447	6.81572
ZNF451	6.25619	6.78132	6.78426	6.86519	4.38284
RPP30	5.48092	5.68431	5.68466	5.83547	4.65308
KDM6B	6.80155	5.89542	6.28124	6.03014	8.45698
LINC00528	5.5957	5.20581	5.55062	5.83396	7.47804
RPAIN	5.83647	7.17374	6.48452	6.56389	3.57892
TNPO1	6.72743	6.71252	6.96285	6.94376	6.27903
NAP1L1	4.94351	5.17063	5.21482	5.21721	4.19792
RAB11B-AS1	4.49239	3.93907	4.2343	4.31548	3.05941
RASGRF2	3.97635	3.83628	5.73401	6.11566	4.44867
LOC642533	4.48894	4.45454	4.39539	4.62114	4.94157
ARVCF	5.4865	5.49089	5.28253	5.25598	5.96793
ITFG1	6.46871	5.33773	5.62617	5.53375	5.08869
TAF8	5.17243	5.10972	5.06733	5.26746	5.23291
LINC00847	5.4435	5.4426	5.48348	5.67779	4.46651
ANKRD36BP2	5.05979	5.3998	5.66701	5.01643	6.05114
EMC1	5.58965	5.50479	5.52667	5.64201	4.93315
LOC155060 /// ZNF783	4.6119	4.70176	4.84881	4.66383	4.80789
VCPIP1	5.034	4.98714	5.11378	5.36319	5.50022
KIF6	4.2102	3.94262	3.79742	3.80812	4.79538
LOC100310756	5.61096	5.35988	5.1444	5.32836	4.99309
PAPD4	6.50133	6.52859	6.40958	6.4422	5.15816
FGFR1OP2	5.86097	5.77524	6.10666	6.27993	5.43032
PPA2	6.48341	6.42217	6.68434	7.0083	4.52858
POM121L12	5.36257	5.19486	5.07267	4.99624	5.92178
TRIM44	6.20971	6.50696	6.30682	6.27919	4.28601
STOML1	4.70536	4.8297	4.65397	4.71529	4.99554
LOC101928747 /// RBMX /// SNORD61	6.02448	7.32439	6.99858	7.43685	3.74733
MAPK12	4.78175	4.73226	4.57963	4.58021	5.28606
COTL1	8.00034	4.83797	5.98525	4.70131	6.47942
RGL3	4.19286	4.24342	3.98616	4.08779	4.8297
YPEL2	6.79624	6.11218	6.44178	6.33648	5.19267
LINC01138	3.5043	3.70647	3.50522	3.29114	4.71671
C2orf72	4.84323	4.75733	4.6244	4.58988	5.44192
LOC101929734	3.95234	4.98612	4.76607	5.25665	4.54961
SCML4	3.3861	4.93111	7.04166	7.50676	4.19748
FLJ38379	2.97604	5.82683	4.18563	4.08043	4.73249
KDM4C	5.12852	6.15425	5.59666	5.73992	3.91995
LINC01210	6.42937	6.43809	6.15919	6.05109	7.10565
LINC00868	4.49877	4.41401	4.21792	4.249	4.85717
FAM229A	5.05119	5.26217	5.51156	5.3423	5.05809
NAP1L4	5.80666	6.01326	6.9562	7.18442	4.84929
PVR	5.2035	4.53876	4.61167	4.46653	5.14251
SLC8A1	5.57717	2.90847	3.54663	2.71459	4.66076
SPATA13	6.58255	4.60046	8.20407	8.54354	6.65996
EHD4	6.0039	5.26173	5.71076	5.4112	5.36331
LOC100996455	3.9002	3.26232	3.36765	3.08096	3.44508
RBM6	6.23993	6.86069	6.44832	6.49612	5.03819
RPPH1	6.44568	5.69281	6.18254	5.50876	6.56364
LOC283887	4.41638	4.45213	4.29702	4.26386	4.93818
C20orf203	4.54205	4.53982	4.29574	4.2779	5.16833
PRCD	4.19161	4.87862	3.95736	4.38224	4.58418
EML4	5.61108	6.89056	6.94139	6.82429	5.73023
ZNF654	4.99744	5.48482	5.51704	5.68368	4.77864
LOC153577	5.57013	3.95249	4.48451	4.47941	4.06249
AC012531.25	4.02984	3.9058	3.85633	3.80332	4.85389
LINC00856	4.23355	4.25621	4.15496	3.97202	4.96544
LOC286149 /// MIR3150A /// MIR3150B	4.28571	4.3651	3.96189	3.7183	4.98382
CNTFR-AS1	4.18228	4.12759	4.00055	3.89907	4.81686
RNF144A-AS1	4.74282	4.60405	4.31196	4.24918	5.57451
DLEU2	5.80085	6.10305	4.26274	4.03805	4.23125
LOC100289090 /// RP11-23P13.6	3.95058	4.67795	5.10729	5.29477	4.24988
LOC286087	2.21812	2.21386	2.24489	2.31705	2.44064
TCTN1	4.64597	5.95139	4.6877	4.69811	5.49958
MEX3C	4.56767	5.36178	5.24437	5.34523	4.58585
NPHP3-AS1	3.98197	3.96767	3.82682	3.79002	4.85992
APCDD1L-AS1	5.35418	5.2375	5.20458	5.07851	5.91521
ALMS1-IT1	4.41988	4.10403	4.28719	4.12413	5.0383
KCNK10	3.49687	3.4246	3.52737	3.12018	4.56646
PAPOLG	5.32935	5.72433	5.63043	5.84007	5.35871
CDC42-IT1	5.48446	5.34192	5.63168	5.38874	5.48036
LOC100506834	3.21151	2.89947	2.77929	2.74484	4.67895
SERPINB6	7.31618	5.84906	6.37551	6.68337	4.48431
KCP	4.61139	4.52774	4.38781	4.39202	4.81356
OR2H1	4.58671	4.20591	4.22873	4.07654	5.60252
CHD1L	6.27975	7.14884	6.355	6.53408	4.77104
LOC100271832	4.28766	4.26792	4.15651	4.13068	4.77651
ESPNL	5.46017	5.57589	5.29124	5.15103	6.28227
LOC340107	4.95733	5.02519	4.97396	4.86353	5.75555
YEATS2	5.63052	5.43423	5.45467	5.47092	4.96044
BTBD19	3.48024	2.77064	3.2742	3.20925	4.58737
HOTAIRM1	6.99755	5.05044	5.83754	5.68879	8.18804
UBE2G2	7.08686	7.2306	7.57447	7.68788	4.50977
HGSNAT	5.54977	5.28981	5.0343	4.97857	4.93862
AK096592 /// YLPM1	5.37815	6.19424	6.37258	6.43356	4.20905
LUC7L	6.82034	7.4637	7.39744	7.47947	4.85022
NUB1	5.10147	5.47977	5.39243	5.64445	5.01165
TTBK2	5.26008	5.12662	5.40222	5.6294	3.6505
RBM25	7.70877	7.83616	8.03828	8.12313	7.47568
KIF5C	4.13035	4.77984	5.37541	5.47983	4.56866
HAR1A	3.43656	3.62093	4.71529	5.04719	3.65488
HECTD1	6.13935	6.34372	6.23895	6.19536	4.96068
ZSCAN30	4.54528	5.48263	5.05464	5.1443	5.01079
LOC283588	4.7126	5.17867	5.13129	4.9648	5.59922
APOL6	6.617	5.48795	6.73915	7.19704	6.35393
ZNF575	4.89607	5.08949	5.372	5.58663	4.84943
AX747140 /// TMEM198B	4.66702	4.73186	4.55549	4.55377	5.23479
FAM188B /// INMT /// INMT-FAM188B	4.20627	3.98003	3.87183	3.84873	4.87748
KLHL18	6.43722	5.53183	5.58864	5.28036	5.84325
PDCD4	4.26424	5.04886	4.69434	5.25603	5.50405
HCG11	4.56233	4.36017	4.06274	4.22067	3.01
NEK8	5.39919	6.34962	5.39283	5.40993	5.36967
TPCN1	6.04929	5.73474	5.57961	5.35553	5.19337
DNASE1	4.90767	5.52548	5.43151	5.66716	4.73343
LOC283177	4.80506	4.68988	4.71278	4.56975	5.64388
EIF1B-AS1	4.33168	4.26365	4.22753	4.05748	5.24947
TPR	6.10637	6.53551	6.96772	6.89603	6.34541
EHBP1L1	7.36957	5.81464	6.31062	5.8863	6.70313
KIDINS220	6.94229	6.24392	6.56907	6.63488	6.56808
BCL10	5.59488	6.19813	5.37181	5.35856	6.71936
LINC01016	4.89118	4.98796	4.84096	4.80219	5.41857
LINC00969	4.6656	5.16821	5.5179	5.51285	3.09756
NT5C	5.20612	6.21838	5.17393	5.48345	4.90134
BC027619 /// RP11-236J17.3	4.07258	4.02322	3.79927	3.74727	4.80203
MCPH1	4.41194	5.41293	4.89408	5.27176	4.13386
G3BP1	4.93976	5.37194	5.73903	5.80146	4.3824
LRPPRC	6.06489	6.62578	6.45305	6.71921	3.54363
PHIP	6.13627	6.15851	6.11083	6.13289	6.09664
MYCBP2	8.40786	9.31363	8.72654	8.84484	6.48597
ABCC9	3.8178	3.80469	3.71151	3.56249	4.67038
LOC100506639 /// ZNF131	5.62768	6.38288	6.621	6.80373	4.57588
RTTN	5.0728	5.52081	5.34801	5.32277	5.90145
DLGAP4	5.19755	5.61434	5.06036	5.06085	5.25572
LOC284009 /// METTL16	5.15456	5.65968	5.74109	5.76856	4.87637
SLC25A43	4.89405	4.87558	3.74258	3.97423	2.26844
ACSL4	5.23574	3.81788	4.02407	3.98131	4.42921
MOSPD1	4.69435	4.6185	4.88453	5.07354	4.11291
LINC00282	2.98829	2.9668	5.19153	5.55312	4.53855
PFN4	4.32061	4.11604	4.10785	3.89376	4.79456
STIM1	5.17312	5.38449	5.39147	5.66399	5.06069
PPP1R27	5.05615	5.09222	4.92305	4.7777	5.76665
LOC100240728	3.84072	4.06468	3.77415	3.41134	4.31167
AX746823	5.05782	4.15156	5.18787	4.62102	3.57893
HECTD4	5.32766	6.19937	5.40842	5.57483	4.74684
WNK2	4.85967	4.82823	4.71615	4.60861	5.53664
LOC100507403	4.76706	4.451	4.55163	4.36488	5.32711
FAM201A	3.73592	3.53805	3.28481	3.28851	4.70366
RNF165	3.08313	3.03139	3.10724	3.25839	3.73178
PPP1R12B	4.89462	4.7358	4.88553	5.00188	6.24482
MATN1-AS1	3.16926	5.10141	4.43772	4.9376	3.07123
BIN3	6.08898	5.99946	6.03138	6.07934	6.82956
ATP6V1H	5.85239	5.8943	5.90293	5.99719	5.1635
LINC01310	4.78351	4.79099	4.61544	4.53194	5.31638
PARD6G-AS1	4.39716	4.30584	4.36011	4.14216	4.97409
GINS2	4.99834	4.94846	4.96351	4.78376	5.58165
KIAA1257 /// LOC100132731	4.55074	4.45319	4.3584	4.25969	5.45406
TTLL4	5.4351	4.73533	4.68045	4.68296	5.7017
KIF9-AS1	4.75422	4.72443	4.54578	4.42713	5.13147
ARHGAP19	5.62228	5.61519	5.43621	5.47651	5.98859
POM121L8P	4.01603	4.15424	4.16224	3.80762	4.90284
GALE	5.05354	4.61205	4.67088	4.69961	4.94894
LINC00642	4.67036	4.61728	4.45936	4.50127	4.88822
AK8	4.70814	4.84452	4.48451	4.36292	5.3489
RAF1	7.51098	7.18377	7.31165	7.30438	8.87457
ASAP1-IT2	4.78733	3.98637	4.20169	4.0054	4.6945
LOC400620	4.17192	4.06463	3.8977	3.81976	4.64338
CHRM3-AS2	2.70112	2.58053	7.62845	6.91254	2.89609
CEP128	3.42853	3.3917	3.90289	3.81939	3.70539
CHIC1	4.09048	4.1855	4.14288	4.24418	4.76612
NTRK3	4.49616	4.38294	4.27901	4.0811	5.26861
C11orf31	7.16924	7.67061	7.29238	7.49041	4.17404
AFG3L2	7.01981	7.13699	7.07608	7.33503	4.55301
DNAJC9-AS1	4.09693	4.05357	3.97493	3.76924	4.86347
C5orf28	4.86972	6.22194	6.26031	6.37366	3.30559
C9orf117	5.45334	5.50614	5.45392	5.26493	5.90244
CASC17	4.03854	3.79143	3.98059	3.69812	4.85405
BC040577 /// RP11-10K16.1	4.31393	4.19571	4.14827	4.13145	5.16069
BC043355 /// RP11-481J13.1	4.55991	4.3254	4.22272	4.06307	5.33812
CD44	7.98485	6.39534	7.41168	7.21304	5.87774
GSTO1	9.03899	7.0375	7.7662	7.79631	6.77304
SLC16A1	4.63455	4.37123	4.50347	4.57977	4.93426
PTRF	4.62996	4.56801	4.44035	4.31551	5.26463
PHLDB3	3.94918	4.24488	4.79583	5.05323	3.69253
NEMF	7.02266	7.34946	7.25792	7.38644	5.92298
ZKSCAN1	5.76041	6.00296	5.96117	6.23072	4.05727
TXLNG	5.01612	6.12072	6.09853	6.38941	4.43101
EIF4G2	7.99413	7.99552	7.83668	7.78616	7.79317
MTERF4	5.24624	6.25938	6.42773	6.7103	4.58681
RPAP3	5.19519	5.84637	5.35267	5.39678	5.68656
CEP78	4.42879	5.31194	5.50448	6.45162	4.24999
AC004951.6 /// AX747182	7.6699	8.01301	8.2804	8.12929	6.09787
STRAP	5.94137	6.09846	6.8477	6.83873	6.424
ERGIC3	6.01014	5.81717	5.91606	5.76203	4.76349
PRKAB2	5.27388	5.62689	5.54184	5.68294	3.78821
KIAA0895L	4.49724	3.59118	4.18812	3.9334	4.17002
TBC1D16	4.59487	4.594	4.46	4.2897	5.01956
DNAJC3	6.08161	4.47291	5.35157	5.22478	6.24148
UBE2I	5.9342	6.54959	6.24164	6.31442	5.09883
CCDC174	5.25835	5.56747	5.43485	5.65564	5.13934
PRR14L	5.97252	6.02592	5.92056	5.85455	5.59513
USP31	5.02244	4.77782	5.03851	5.26919	5.79245
TAF11	6.70313	6.83098	6.93466	6.99226	4.94866
TNRC6B	7.08862	8.01737	8.1058	8.16772	6.81452
BAIAP2-AS1	6.78913	4.75576	5.48002	5.02533	5.37986
AF289551	4.27877	4.89216	5.25591	5.68664	4.46376
PEX13	4.19448	4.48325	4.43491	4.65226	3.88079
LUZP1	5.91523	5.29941	5.95159	6.16377	4.57809
CLLU1 /// LOC100507616	2.54431	6.59689	2.51481	2.36397	2.61883
LOC101930048 /// LOC101930053 /// VLDLR-AS1	3.99302	3.78608	3.76494	3.58331	4.84648
UBTF	4.74888	5.91361	5.60015	6.14506	4.57791
SLFN13	2.82751	3.37008	3.70353	4.46073	2.82447
SF3B2	6.20913	6.16449	6.12947	6.04531	6.40056
ATF1	5.43176	6.06477	5.84437	6.0962	4.52733
STX16	6.33874	6.11245	6.80532	6.75683	5.87144
ZNF417 /// ZNF587	5.05197	5.6171	5.56979	5.79023	5.52529
SRPK2	5.92653	6.35876	5.94465	6.34314	7.42472
LINC00662	4.55011	5.20419	4.81691	4.82436	4.48342
PIGW	3.8708	4.29427	4.28751	4.77499	2.28201
TSEN54	5.42971	5.69968	6.64738	7.45914	5.39045
LOC100132356	4.72632	5.60504	5.07004	4.93699	5.01038
HOOK3	6.16226	5.00594	5.22863	5.0996	4.41463
ZDHHC18	5.18201	4.89183	5.36771	5.3058	7.59463
SIRT2	5.65244	5.71575	5.52133	5.96245	5.95242
C22orf15	4.58195	4.47916	4.3809	4.41903	5.1082
MPHOSPH9	4.48104	5.04699	5.71698	6.36687	3.09321
ERICH1	6.85396	6.10794	6.24335	6.18113	5.70757
PLEKHG2	4.95369	5.20292	5.09929	5.0058	5.73414
C14orf180	4.23475	4.3101	4.04301	3.96108	4.80748
ORAI2	6.51884	8.15072	5.92617	6.09457	6.71094
LOC101928623 /// LOC401320	6.23895	5.75017	5.88878	5.62314	5.26037
ABCC5	5.09546	5.11801	5.26051	5.22589	5.81739
LRRC27	4.75002	4.60526	4.63795	4.57336	5.68088
ZNF493	5.54967	7.17286	6.86373	7.06419	6.33694
TMED4	6.4101	6.75259	6.99817	7.09232	5.92102
FTX	6.1705	5.20716	6.12993	5.33486	3.81046
LOC101927933 /// LRRC8C	5.77957	4.5358	6.48933	6.47714	4.29235
PAXIP1OS	4.99989	5.62057	5.59256	5.84869	3.78108
LRTM2	4.72143	4.9136	4.62949	4.51696	5.35627
KRBA2	4.24698	4.08005	4.14985	3.95572	4.74959
SLC2A11	4.13361	5.62449	4.82761	5.16646	4.39758
VNN1	6.34161	2.93705	3.96844	3.01176	5.66697
AX748417 /// CAMK1	5.09997	5.70844	5.41555	5.33129	4.77088
HM13	6.18124	4.99318	5.42333	5.28192	5.54169
LOC100131541	4.83556	4.92744	6.58219	6.33571	3.62208
FLJ37786	4.35855	4.25538	3.89833	2.94635	4.59023
TEX22	4.53457	4.57058	4.47062	4.37686	5.14705
UBL4B	4.48954	4.23156	3.95842	4.13566	4.82392
SNORA43	4.70033	4.73947	4.57252	4.4511	5.2626
ZNF621	4.82695	5.19726	5.00587	5.3117	4.0875
SPATA24	6.55818	6.12222	6.26409	5.99082	7.44899
C15orf57	5.12773	6.32516	5.06209	5.02279	4.89304
LOC100507462	3.53897	3.57537	3.45417	3.06958	4.32577
BANK1	5.05675	10.7939	4.74291	3.02707	3.46939
MALAT1	10.5354	10.3215	10.8387	10.6167	10.7413
LOC158960	7.02956	6.45446	6.54791	6.49534	7.41716
LOC441461	5.88634	5.76836	5.86138	5.73606	6.52495
C1orf85	5.8906	3.84824	4.74232	4.71453	3.62891
ZNF260	3.96807	5.76941	5.25495	5.75133	2.74409
ATOH8	5.14414	5.29453	5.12047	5.03587	5.6813
FAM13A-AS1	5.99269	5.27147	6.24431	5.3343	6.65475
VPS9D1-AS1	4.9574	5.0273	4.99105	4.90731	5.41456
MAP4K4	6.24415	6.50171	6.27201	6.01886	6.49229
ZBTB38	5.79359	6.37002	6.73401	7.43695	4.76076
AX748339	4.07543	5.2057	3.99928	3.86702	3.62779
SMCHD1	7.19816	8.20108	7.83779	7.75655	9.75504
FAM120AOS	6.0714	6.18947	6.14992	6.31048	6.1008
ZNF789	4.2913	4.92843	4.92348	4.96357	4.14194
PIK3R6	4.71814	3.73449	3.68292	3.52665	4.38827
NFYC-AS1	4.42136	5.15309	4.72154	5.19323	4.64904
AP2A1	5.85607	5.56573	5.56786	5.55872	6.02183
RP3-525N10.2	5.49361	2.35911	2.91547	2.33433	2.5901
LOC102723918	5.68571	2.75227	3.27494	2.77228	3.28179
TM2D1	5.88345	5.87569	5.95446	6.1614	4.38953
ATAD2B	5.69477	5.52304	5.36081	5.57278	5.00901
ZNF831	2.7711	3.75256	5.03849	5.6757	3.04329
SREBF1	5.35649	4.93796	5.37225	5.68658	5.44115
PLK5	4.62992	4.35795	4.29866	4.21937	5.14555
LINC00907	3.86997	3.68121	3.83817	3.64586	4.87514
DESI2	5.77569	5.86374	5.78508	5.85406	4.94198
CLIP1	5.81317	4.94076	5.41506	5.30498	5.18231
ZNF765	6.17025	6.70183	6.4271	6.53619	6.2
CEP164	6.22312	6.34167	6.49992	6.4173	5.82249
HCG18	5.03144	5.52101	5.49189	5.66034	4.51156
RPL32P3	5.52808	6.03082	5.76133	5.76056	5.0972
THEMIS	3.00296	2.76451	6.24236	7.74814	3.51372
FOXP1	6.28415	8.06789	7.95568	7.8971	5.8478
CCDC163P	4.88442	5.22752	5.26009	5.2692	5.4001
PTPRE	7.25761	4.28374	5.55382	5.08038	7.40872
EFCAB14	6.7267	6.89441	6.68159	6.85172	5.94633
SEPT9	6.94926	6.91733	7.55537	7.59744	5.76263
LINC01018	4.01088	3.96457	3.74086	3.3544	5.10119
SIRPB2	7.58167	3.81733	4.68534	3.62885	6.74393
DHX36	6.28583	6.7791	6.86952	7.02964	4.605
HCG27	5.15804	4.87258	5.21642	5.02289	7.64701
MB21D1	4.9893	3.95931	4.02	3.92197	3.78563
FNIP1	5.93542	5.46272	5.32654	5.20699	7.06583
AL833181	5.93148	8.84505	5.39317	4.04342	4.87592
LOC284600	5.04447	5.19261	4.90358	4.77568	5.41707
FBXO9	6.70803	6.79129	6.83659	7.02342	5.414
C14orf64	3.62663	3.53583	5.39665	5.60697	3.80447
RRP12	5.39354	4.90786	5.10954	4.96477	5.32055
TMEM80	6.09807	6.17984	5.79653	5.88066	4.99486
FAM87A /// FAM87B	4.02463	3.76827	3.65323	3.46786	4.81439
KAT6A	6.4044	7.28358	7.35261	7.30774	7.14431
MPV17L	6.57185	6.35862	6.28573	6.02581	7.47246
ANKRD20A5P /// ANKRD20A5P	5.38239	5.3281	5.24108	5.0786	6.378
KRAS	5.38768	4.83682	5.11926	5.00043	5.87917
LOC100996286	4.92425	4.95789	7.12451	7.08105	5.31244
VHL	5.9245	5.9579	5.63112	5.81236	5.56867
ATXN1	6.23926	4.19035	5.87497	6.18099	6.33616
MAGI1	4.30061	4.27226	4.21026	3.93506	5.24617
PKD1L2	4.2235	4.11153	3.97322	3.9274	4.93625
LOC101928505	3.98611	3.78183	3.66659	3.372	5.94567
MAFG-AS1	4.90836	4.82447	4.79551	4.70054	5.43365
SMIM7	6.28939	5.97618	5.94731	5.99551	4.76714
LYNX1	4.51328	4.13642	4.2011	4.07083	4.89483
PRR14	6.39015	6.60841	6.37421	6.53274	6.69028
ZCCHC10	6.24541	7.10804	6.13804	6.21111	4.59997
C1orf61	4.64366	4.63673	4.42992	4.53641	5.17587
TCP11L2	4.43763	4.82223	4.88876	4.7224	5.10225
C21orf58	4.54492	4.69166	4.56619	4.60455	4.8468
IL21R-AS1	4.59556	4.42051	4.39988	4.29399	4.99755
D21S2088E	4.38385	4.15103	4.08253	3.82079	5.05724
LRCH3	5.29292	6.09946	5.94771	6.06347	4.20972
VPS8	5.54991	5.05302	5.30401	5.18363	6.15059
LRRC25	7.56523	3.74257	4.97071	3.32463	7.30925
BC042590	4.76305	3.80347	4.66385	4.25072	4.53427
ARIH2OS	3.43508	4.5277	4.32583	4.92719	3.52044
ACVR2B	4.69758	4.5613	5.10679	4.70156	5.38628
FBXO18	5.3315	5.62592	5.46011	5.28005	5.29352
RHOQ	5.6001	5.33361	4.06492	3.86822	4.73292
CHDH	4.79583	4.64238	4.52083	4.53026	5.16487
CTD-3222D19.5 /// MED26	4.60775	5.02632	4.60018	4.36114	5.04857
C11orf54	5.22039	5.39541	5.46076	5.39263	5.76049
LOC101927710	5.03769	4.96571	4.95086	4.67298	5.78819
C1orf200	4.56159	4.54356	4.47263	4.32023	5.09602
RP11-83N9.5	4.64613	4.73311	4.59825	4.48563	5.32376
ZNF333	4.65275	4.38945	4.5009	4.30119	5.21476
NDST2	5.85565	5.29877	5.56052	5.50038	5.59448
PHKA2	5.76635	5.61668	5.48723	5.46778	5.60332
INO80C	6.2862	6.23868	6.12288	5.95648	6.72992
ZBTB40	5.4998	6.10668	6.1085	6.18698	5.12107
CHPT1	6.6546	7.68946	5.81507	5.29713	5.43586
ADAMTSL3	4.48418	4.32556	4.17334	4.15191	5.03705
LTB	5.93364	8.02898	8.12336	7.86637	7.7225
LOC101928483	4.77563	4.59765	4.57449	4.50136	5.20139
ALDH1L1-AS2	4.42799	4.41715	4.24101	4.04947	4.93219
LOC646241	4.06578	3.68548	3.79871	3.45939	5.40891
EBF3	4.0582	4.05096	3.8661	3.60408	5.78928
MTDH	7.91558	7.80594	7.83477	7.89666	4.38412
LCN6	4.42682	4.08429	4.15117	4.10222	4.87443
SAMHD1	8.62927	3.60316	8.12986	7.44377	4.52005
TIMM17B	4.40684	4.44261	4.38065	4.31069	5.02905
CBR3-AS1	4.87704	4.70397	4.86741	4.72153	5.4044
LOC728353	4.62262	4.69405	4.62696	4.66427	5.09028
MDFIC	5.35876	5.62036	6.43715	6.11556	3.33929
RUVBL2	5.91734	5.82891	5.82665	5.84446	4.9591
DDX42	6.33605	6.57399	6.5745	6.53651	5.58646
BTG1	7.93285	9.36999	9.01607	9.05956	8.72456
SLC25A34	4.76969	4.78712	4.79224	4.69298	5.10839
SYF2	6.76469	7.03491	6.78559	6.93982	7.02843
SFXN3	6.44446	5.83556	6.60509	6.68026	5.13107
PDXDC1	4.0045	4.39809	4.15669	4.79555	3.15098
VPS37C	7.08827	4.58639	5.28211	4.56706	7.28892
DIAPH1	6.4066	5.72673	6.17794	6.15167	6.27942
LOC100289019	5.11647	5.75198	6.0208	6.13285	4.90123
FHAD1	4.63758	4.53579	4.44845	4.29885	5.26176
C5orf56	5.96617	6.53754	6.53015	6.78606	6.31077
GRIK2	3.7542	3.29385	3.50424	3.32791	6.36337
SLC29A2	4.77935	4.78661	4.6158	4.53851	5.12115
LOC101927990	3.16606	3.10516	3.27667	2.87343	4.79667
LOC101927069	5.32102	2.94269	3.22665	2.69714	3.97213
LOC101929456	4.28278	4.11981	4.06625	3.9636	5.12018
LINC00523	5.18852	5.2296	5.05388	4.93181	5.81144
AHCTF1 /// AHCTF1P1	4.02141	4.00076	4.02097	3.74321	4.76913
GDPD1	4.1128	4.13898	4.20142	4.41033	4.01183
SNAI3	4.73903	4.37737	4.41063	4.56425	4.9191
CTB-92J24.2	3.591	3.78767	3.32645	3.3963	4.74185
WTAP	7.1337	7.33219	7.38855	7.50748	7.14081
LOC221122	4.56184	4.37643	4.30633	4.21671	5.13579
TMEM95	4.34835	4.30975	4.18331	4.18586	4.75783
RP11-68I3.11	4.44082	4.09173	4.06099	3.95329	5.96387
GLCCI1	4.28036	6.25531	6.0568	6.30019	5.47012
C1RL-AS1	4.51227	4.65088	4.43788	4.48233	4.82673
ARHGEF28	4.4744	4.29188	4.223	4.12074	5.34961
ANKH	4.16764	4.78982	5.30376	5.29657	4.69623
KLHL6	6.12584	6.57231	6.95562	6.52097	4.45809
NKPD1	4.53764	4.688	4.65921	4.75166	5.00471
LINGO3	5.79818	5.63441	5.71778	5.5535	6.22242
ARHGEF1	5.27487	5.39872	5.69244	5.67419	4.38199
LOC339166 /// WSCD1	4.17497	3.90132	3.8527	3.56518	4.94503
NR5A2	3.46908	3.21784	3.22485	2.76589	5.20582
LINC00705	4.56586	4.35666	4.15113	4.17383	5.37706
SAMD11	4.88281	4.75136	4.60391	4.61975	5.47128
LCNL1	4.31513	4.26803	4.25068	4.34254	4.64053
LOC101928200	4.86744	4.68833	4.69111	4.55622	5.26847
NFE4	3.46147	3.39173	3.42553	3.31062	7.11139
ZNF677	3.64824	5.13778	4.60739	5.00135	3.4454
PRDX5	8.8132	7.86529	8.0528	8.04337	8.90471
CATIP-AS1	5.3895	4.01942	4.36919	3.99579	5.59958
CALCOCO2	6.26179	5.79685	5.73714	5.59492	6.2385
METTL21EP	3.38722	3.17322	3.30206	3.25443	4.87394
FLJ37201	3.20793	3.1669	3.39545	3.1595	4.84984
WHAMMP2 /// WHAMMP3	4.2316	4.53373	5.79919	6.04504	3.74136
SCPEP1	7.29267	6.40612	5.40631	4.76565	5.57085
LINC01127	5.46973	3.24273	3.49733	3.20434	6.00322
ITGAD	4.17021	4.10041	4.06692	3.94584	4.94483
AKT2	5.54502	6.11026	6.08557	6.17101	5.65309
SFT2D1	7.07855	6.56069	6.36441	6.10189	7.24395
NEDD9	6.05444	6.20204	5.46533	5.5949	7.29557
ELFN2	4.22258	4.18118	4.0705	3.90568	5.02296
SNRPN /// SNURF	5.82031	7.55546	8.01415	8.06167	4.65974
CMTM7	7.30312	6.9611	7.28168	6.97268	6.19203
LINC00996	2.67188	4.07699	3.71221	2.48078	2.72684
HCG22	4.45726	4.39085	4.15519	4.13977	5.26857
C19orf84	4.46648	4.22806	4.1935	4.08899	4.99585
LOC101929684	3.88848	3.65603	3.45614	3.47605	4.5756
SYT15	5.54617	5.41152	5.25321	5.14101	6.06049
KRTAP10-11	4.81351	4.73132	4.63703	4.49437	5.40775
ZNF169	5.19052	5.45131	5.23303	5.45038	5.42516
LOC151657	4.50667	5.28922	5.23581	5.23448	5.00415
BCL2L13	5.56682	5.07505	5.12569	5.14038	5.12085
TNRC6C	3.86174	4.869	5.36261	5.70768	4.46017
LOC101928973	4.45651	4.52433	4.46953	4.56721	4.59865
LOC729506	4.27368	3.97243	4.01772	3.95844	5.1286
NID1	5.52395	3.35921	3.87479	3.30103	3.6782
EYA4	3.60596	3.3992	3.59716	3.11135	5.46495
SLC22A25	6.16822	5.7454	5.81756	5.51007	7.0261
LOC101929488	4.21342	4.47368	4.17784	3.97764	4.94267
ADARB2-AS1	4.95703	4.88097	4.80187	4.59868	5.63786
AMZ1	5.3956	5.40555	5.33964	5.32534	5.97248
FLJ43315 /// LOC101927088 /// LOC101927527 /// LOC101929518 /// LOC442028	3.76717	3.8143	3.46409	3.2686	4.69659
PEX2	4.54173	4.66554	4.38806	4.63514	4.83526
TMEM105	6.12696	6.0905	6.03207	5.92116	6.8044
LOC340340	3.99375	3.87127	3.88563	3.6169	5.74524
LOC100422781	4.46424	4.48357	4.38143	4.31972	5.08249
LOC101930630 /// STRC	4.3346	4.33613	4.36582	4.42516	5.10815
OTX2-AS1	3.75011	3.46194	3.57154	3.10113	4.59065
LOC285181	5.02153	3.53452	3.71799	3.43043	4.64092
LOC440602	4.41469	4.14731	4.10131	3.97215	5.14783
DNASE1L3	3.70811	4.48498	4.2719	3.36174	4.15731
LOC101927166	6.47264	6.42666	6.29016	6.25745	6.7866
LOC692247	4.5249	4.76119	5.16838	4.74142	4.82432
C12orf42	3.57956	6.01953	3.92015	3.96297	3.92695
SOHLH1	4.39542	4.08929	4.16941	4.0859	4.93491
CTB-113P19.1	4.21566	4.02853	4.0913	4.02662	5.01941
LOC283585	3.64621	3.45989	3.49143	3.39763	5.4855
LOC101928435	4.14951	3.86984	3.86413	3.80581	4.88103
ARHGAP15 /// LOC101928361	5.86322	6.69389	6.81972	6.76803	7.23632
MYLK4	4.41598	4.27722	4.22712	4.05079	5.03967
BEND7	4.40697	4.20339	4.00957	3.69433	5.31022
LOC283914	4.21501	4.11028	4.13438	3.93207	5.09448
LOC101927592	4.372	4.13756	4.12093	4.23812	4.97878
OGFRP1	5.38328	5.30364	5.2577	5.09209	6.03179
LOC100506368	4.15012	4.16778	4.0052	4.00941	4.91271
FGD5-AS1	6.59211	6.43847	6.49911	6.46736	6.78976
PRKG1-AS1	3.53084	3.09996	3.44928	3.08165	5.08096
LOC101929284	4.1386	4.17129	3.99317	3.93561	4.95217
RP11-472K22.1	3.82394	3.73943	3.77004	3.65153	4.8041
DNAH6	4.44921	4.38845	4.38143	4.36119	5.02421
LOC101929478	4.33862	4.17419	4.10252	4.06342	4.82233
TAL1	4.89021	4.73629	4.5808	4.60765	5.37898
PSMG3-AS1	4.37411	5.1724	4.83747	5.1266	4.71708
BC037861 /// CTD-2036P10.3	3.64839	3.73329	3.61465	3.50345	4.56772
NUDT17	4.48629	4.58472	4.49505	4.49792	4.7932
LOC100133669	4.16596	4.5001	4.06788	4.1926	4.73232
SIGLEC16	5.14783	3.81556	3.81088	3.70837	4.40377
CEPT1	5.96289	6.71243	5.49461	5.50133	4.35633
SF3B6	4.1028	4.50376	4.50586	5.09646	4.47987
ANKUB1	4.52233	4.41891	4.39722	4.27729	5.22837
SMARCC2	5.86681	6.58416	6.21996	6.60579	5.04573
C1orf167	4.87772	4.83136	4.70843	4.71304	5.32866
LOC286068	4.25159	4.07496	4.11261	4.02113	4.87356
MYOZ3	4.98527	4.90769	4.82666	4.67712	5.61515
CCND3	6.80876	7.28462	7.95638	7.85525	7.20066
JAK2	6.32281	4.67448	4.61714	4.28378	4.27424
LINC00163	4.48128	4.41867	4.34744	4.28158	4.88873
LINC00424	5.06246	5.02427	4.91795	4.7913	5.72865
LINC01359	4.5434	4.45594	4.53194	4.39075	5.53393
PDE5A	3.94594	3.77478	3.67396	3.58909	4.92554
SGSM1	4.46704	4.4594	4.35336	4.28004	5.12043
PLXNA4	3.68887	3.71825	3.92445	3.76776	4.12832
NLRP1	6.32464	6.05688	6.25987	6.21783	7.05031
LOC100507156	4.46684	4.23865	4.22169	4.02072	5.23012
BCORP1	3.58625	3.70452	4.16836	4.52792	4.58415
OR7D2	3.96171	3.99341	3.82207	3.67278	4.40238
LDHAL6CP /// LDHAL6CP	3.49341	3.39729	3.45298	3.32047	4.83726
C15orf54	4.29286	4.03171	4.13352	3.89315	5.0702
CARD11	4.72928	6.19288	6.01798	6.03503	5.07769
PROM2	4.85484	4.83081	4.70685	4.74123	5.3661
B3GALNT2	5.62007	5.22383	5.06423	5.02435	4.37314
SLC8A3	4.53119	4.36745	4.39509	4.38039	5.01428
SSBP1	7.02049	7.43891	7.67592	7.79954	5.02967
LARGE-AS1	4.59983	4.58275	4.51223	4.46159	5.0847
UBE2W	4.69508	4.40544	4.41353	3.76646	5.40393
CNDP2	7.13679	7.15035	6.77758	6.57604	5.49768
LOC101927623	4.27837	4.27171	4.17783	3.98507	5.0674
TMEM108-AS1	4.12964	3.80648	3.79698	3.39185	5.28837
SMPDL3A	3.55409	3.26922	3.77036	3.12739	4.72331
HCN1	4.41214	4.6493	4.51343	4.56074	4.71915
PRTG	3.8207	3.78348	3.81415	3.54719	4.83048
RP1-142L7.9	3.77951	3.5349	3.8867	3.36434	5.89455
C1orf86	5.16037	5.28211	5.03635	5.09588	5.27456
FOXN4	4.83979	4.78331	4.66387	4.786	5.43485
LOC339988	5.14047	4.85204	5.78512	6.41017	5.56105
CTD-2297D10.2	4.35242	4.25458	4.17613	4.03349	5.19596
MDS2	4.03294	5.23451	6.67265	5.88347	4.2672
LOC339807	4.67011	4.50146	4.4628	4.5167	4.92115
LINC01231	5.08357	4.75953	4.8227	4.6455	5.43425
TNRC18	6.27282	5.65972	5.79062	5.52213	6.41076
LRRC16A	3.9595	4.1479	3.78731	3.79775	4.74187
LOC101927210	4.11638	3.95131	3.86421	3.62439	4.84182
LINC01448	3.65841	3.44527	3.41216	3.39644	5.20785
ITGAX	6.4205	4.60687	5.28183	4.25644	7.61537
BC039485 /// LOC284930	4.59417	4.56481	4.46166	4.38099	4.99988
ITGB8	3.76012	3.47253	3.45279	3.07884	4.30869
RP5-1039K5.16	4.65854	4.63064	4.45325	4.36013	5.29468
AP001605.4	4.23239	4.01818	3.96243	3.9162	4.69494
LOC100289061	4.85646	4.6022	4.69397	4.52738	6.86493
LOC284837	8.20182	3.67263	5.33133	3.38791	3.88953
BC039686	4.41087	4.47157	4.54039	4.2928	4.93107
BC039673	4.38258	4.18617	4.2539	3.77149	5.72057
RP11-521D12.1	4.39278	4.20966	4.06925	3.93667	5.12628
SLC38A10	5.65538	5.12879	5.16627	4.99452	5.16885
ERBB3	4.29997	4.23814	4.16847	4.18721	4.75277
NEGR1-IT1	3.89316	3.75809	3.52945	3.30767	4.72519
MAGIX	4.39372	4.45205	4.35241	4.16995	4.8825
SIK3	6.50232	6.63207	5.96518	6.01113	6.11209
USP25	6.41399	6.26026	6.31408	6.48459	6.40865
SLC25A45	4.34398	5.66461	5.90597	6.06044	3.83248
MOB3B	4.60724	6.12572	3.9825	3.69576	4.50763
DDX10	3.80296	3.58577	3.7324	3.35046	4.92541
ANO8	5.03129	4.27768	5.17355	5.25272	4.85867
LOC286359	4.40588	4.23922	4.25734	4.24036	4.83223
TMEM72-AS1	4.31125	4.18593	4.23746	3.97596	4.89457
TMEM67	4.13566	4.16343	4.35073	4.17367	5.24934
PLXND1	6.67101	4.59906	5.37085	5.34714	4.92546
MORN1	4.73377	4.80782	4.74572	4.54762	5.42993
HSD17B4	3.78794	3.56242	3.48386	2.91966	5.20658
AL831948 /// RP1-197B17.3	4.64197	4.40591	4.36811	4.25339	5.37102
LOC100506870 /// LOC283140	5.23656	5.17415	5.12062	4.99427	5.95159
LINC01226	4.45574	4.39647	4.36255	4.23271	5.0504
MCF2L	4.29796	4.62808	4.59763	4.65261	4.8705
PIGG	5.63579	6.02955	6.09327	6.20354	5.52221
LOC283045	5.95557	5.77407	5.63124	5.37774	6.90985
LOC283194	4.59645	5.04407	4.4403	4.31711	5.12342
LOC284395	4.86538	4.57412	4.61714	4.34948	5.45178
LOC338963	4.35774	4.19178	4.16991	3.88104	5.14734
YWHAEP7	4.64417	4.59162	4.47401	4.3149	5.19702
RNF130	6.99015	4.57916	5.17838	4.60892	6.5434
CEP41	4.04911	4.26865	4.6509	5.44075	4.5018
AK9	4.73323	6.20572	5.56338	5.76896	4.43377
LOC100132354	4.10869	4.17814	3.956	3.86062	4.61753
LOC100130456	5.16256	4.98528	4.98638	4.74283	5.78671
RELL2	5.31589	5.70968	5.70614	5.97768	5.54847
KNCN	4.13132	4.09116	4.18175	4.04933	4.94222
YTHDF3	6.51057	5.92906	5.86404	5.99772	6.65396
ATP11B	5.69029	5.91588	6.15934	6.47534	6.07201
FAM71A /// FAM71A /// RP11-338C15.5	4.80961	4.70061	4.67708	4.52299	5.44878
A2M-AS1	3.90816	3.6427	6.38911	7.29749	4.10596
LOC102723927	3.15916	3.65453	3.52528	3.45949	3.48998
DTHD1	2.54477	2.56694	2.47106	3.55569	2.64384
LINC00957	7.35719	7.47905	7.28198	7.08591	7.7903
LINC00700	3.95657	3.82354	4.15841	3.42376	5.44825
LOC729173	4.78948	4.61276	4.50041	4.19745	5.71748
IFT80	3.5759	3.56283	3.8076	3.56482	4.74731
AX747826	4.75437	6.42314	5.1605	5.07002	4.4604
EMID1	4.60124	4.42741	4.28497	4.3052	5.35363
KY	4.7031	4.69058	4.5284	4.51895	4.98286
LOC100133920 /// LOC100996643 /// LOC101928195 /// LOC101929583 /// LOC286297	5.03814	4.89973	4.73058	4.5906	5.86287
LINC00491	5.78835	5.47004	5.2036	5.00834	6.64012
PSAPL1	4.74711	4.66954	4.54588	4.33801	5.29238
ARMCX4	4.3369	4.18952	4.21454	4.2002	4.99649
LOC729732	4.87318	4.74903	4.75811	4.48875	5.61309
KRT72	3.89738	3.9504	5.61694	5.60353	4.25562
MRGPRG-AS1	4.92463	4.74323	4.76352	4.65027	5.65236
KLF13 /// LOC100499221	4.26382	4.32028	4.41688	4.4656	4.76458
ZBED3-AS1	4.08123	4.09082	3.94983	3.9633	5.08145
P4HB	7.80086	6.26058	7.0439	7.08384	5.18926
GSN	5.23422	4.53186	4.64553	4.44554	5.90022
TMC1	3.88537	3.95811	3.98141	3.81606	4.91039
CCDC36	4.57401	4.51809	4.42081	4.33338	5.00066
NUTM1	4.60466	4.55406	4.46023	4.33246	5.29479
EDN1	4.22835	4.22265	4.29804	4.15502	4.70338
FAM98B	6.43549	6.39934	6.82923	7.11802	4.10442
ASB15	4.04435	3.95879	4.00099	3.80689	4.81775
SLC9B2	3.54377	4.7639	4.44122	4.75964	4.09315
RP11-158G18.1	4.23497	5.38542	7.61412	7.69174	4.86234
C14orf183	4.03722	4.10366	3.94257	3.68796	4.72624
KRTAP11-1	3.95801	3.78754	3.69175	3.50491	4.69229
KIAA1211	4.00121	4.04806	3.9237	3.67476	5.0769
LOC101927079 /// LOC727924	5.1316	4.95256	5.05346	4.86794	5.94923
FOXP2	4.31697	4.29422	4.19488	4.12347	4.98947
TNR	4.88363	4.59956	4.575	4.52978	5.58593
KRTAP8-1	4.18799	4.13745	3.89449	3.73217	5.07183
MGST1	8.62968	3.53065	5.55304	4.37447	4.36207
KMT2A	5.94718	7.19225	7.25835	7.36888	4.18196
XAGE-4	4.72675	4.7493	4.62235	4.54707	5.04866
EGFR	4.42974	3.94202	4.10048	3.80377	5.24697
DYNLRB1	7.35647	7.44103	7.52614	7.5063	7.20776
PMP22	4.22172	3.95254	4.12484	3.77938	4.31228
FUT6	4.14726	4.02199	3.92392	3.80104	4.63023
FUS	6.82038	7.40084	7.64829	7.59175	6.49666
ALDH3B1	6.62162	4.79999	5.18241	4.78677	5.80396
TEX26-AS1	4.31302	4.1544	3.99077	4.02174	4.87188
MEDAG	4.43962	4.51215	4.42886	4.21504	4.81874
PAK1	6.72024	4.48088	5.20336	4.79049	6.7227
METTL15	4.22142	4.06021	4.05769	4.05863	5.21605
NADSYN1	6.20751	6.1604	6.0913	6.07524	6.15956
RPS16P5	6.05675	7.79849	6.83381	6.22965	7.34177
TTLL5	4.68262	4.78686	4.71454	4.81053	4.80439
MFN2	5.45765	5.23436	5.08273	5.139	5.82048
MYNN	4.49908	4.93968	4.66926	4.87501	5.41444
TCEA1	4.94054	5.21361	5.13137	4.97619	5.40207
PLD4	4.10805	4.6825	4.25101	3.62878	4.08468
CD6	4.16929	4.26004	6.64169	6.38076	4.4162
RP11-305O6.3	3.04422	2.86063	3.13969	3.0001	3.7566
CUX2	3.20757	3.19594	3.30325	2.99218	3.56062
BC022568 /// CTC-265F19.1	3.9627	5.81955	3.84488	3.71515	4.3424
MACC1	3.59533	4.04779	3.60594	3.4633	5.18718
DNAH1	4.99134	5.14314	5.18774	5.28383	4.93346
FGF22	4.81827	4.74924	4.59509	4.55556	5.46012
LOC440028	4.80475	4.75437	4.68462	4.45322	5.40014
LOC100129722	4.3974	4.6804	4.56954	4.48782	4.76763
NFE2L2	7.93443	6.83026	7.07806	7.0864	8.34997
CSNK2A1 /// NFE2L2	4.79734	5.64869	4.85297	5.52022	3.57825
C20orf181	4.50656	4.62918	4.37772	4.37017	4.89187
CLN6	5.22725	4.47856	4.58906	4.44336	5.16709
PNN	7.41717	8.69714	8.39657	8.4539	6.04863
OR10D3	4.04843	3.84296	3.84521	3.64785	4.85048
OR1J2	4.53325	4.12135	4.09697	4.05602	5.445
ABLIM2	4.43479	4.43355	4.22062	4.20193	5.0321
CD74	8.88849	9.51261	7.5345	6.25416	6.15003
DEFB124	5.29465	5.29652	5.17572	5.10053	5.67428
ARL3	6.02608	5.58799	5.87116	6.04655	6.63521
TRIM69	6.52202	6.35707	6.57929	6.95878	6.87767
NUDT16P1	5.76948	3.99502	4.20402	3.61849	5.27716
TRIM52	5.86667	6.77486	7.06614	7.10614	4.81595
RSPH3	5.85503	5.21564	5.27993	5.04666	6.20405
GALNT1	8.10558	7.38099	7.33941	7.55535	7.41647
ITPRIPL2	6.51169	4.21866	4.74867	4.26048	4.30191
CSAD	4.99376	4.5928	5.23423	4.61298	5.85617
SMEK2	4.30406	4.62808	5.02643	5.25336	4.60972
LINC00354	4.1295	4.23512	4.03006	3.845	5.07441
IDO2	3.2859	3.1566	3.21072	2.98501	3.59018
RP11-540O11.1	5.21411	5.20237	5.1117	5.0375	5.94621
C2orf74 /// KIAA1841	4.96806	5.85552	5.66145	6.15012	3.08803
PLIN5	4.96817	4.78719	4.79016	4.76819	6.2897
YTHDC2	6.38294	6.74112	6.77445	6.91717	4.26588
PAAF1	5.37212	5.52751	5.54826	5.67628	4.20243
CHERP	6.06377	6.18241	6.08787	5.98955	6.46589
FKBP15	6.58394	5.12261	5.26783	4.97071	5.24248
SLC22A23	4.90551	4.62564	4.72923	4.65778	5.51628
RNF207	4.60746	4.27129	4.27955	4.09956	5.15221
C10orf76	5.55961	5.74217	5.25841	5.38847	4.11577
UROS	5.03543	5.17241	5.18704	5.52381	4.18039
CCDC157	6.00927	5.85715	5.84502	5.54269	6.66127
DDX50	5.8454	6.88121	7.1589	7.21064	5.68861
IRAK3	7.34942	3.60806	4.52448	3.14727	5.41624
CCDC90B	5.61293	6.27517	6.0283	6.16948	4.96497
WASIR1 /// WASIR1 /// WASIR2 /// WASIR2	3.22333	5.48609	3.02793	3.06259	3.66953
RP11-102M11.2	4.08106	4.09156	3.85969	3.70007	4.68732
ACBD5	6.7147	5.94695	6.2492	6.53134	4.96396
LOC101928140	2.8274	2.67562	2.7257	5.64288	3.6369
LOC728196	3.95361	4.06491	3.92693	3.68916	4.95084
IQUB	4.15673	4.00218	4.13385	3.56799	5.94836
CX3CR1	6.94916	3.40543	5.88236	6.83355	5.2447
PITPNC1	5.12156	4.42401	6.07449	6.54102	5.13567
C16orf72	5.95355	5.95204	5.88839	6.08591	7.40956
SRGAP2 /// SRGAP2B /// SRGAP2C	5.76096	4.27456	4.45472	4.16523	4.63332
LOC101929889 /// SPN	6.12559	4.52786	6.12527	6.30565	5.35866
C11orf21	6.69187	5.82997	6.29996	6.78868	6.01905
GABPB1-AS1	5.66897	7.66865	7.09527	7.10081	4.53912
PIGT	6.27677	5.95235	6.05704	6.08225	5.82011
VMP1	5.96959	3.92243	4.30707	4.039	5.10124
LOC284379	4.0411	4.05741	3.82192	3.86603	4.70427
FAM201B /// LOC648761	4.97015	5.07911	4.76636	4.85662	5.27905
LMF1	4.40734	4.62179	4.72854	4.77961	4.40292
AP3M2	4.29902	4.77879	6.59057	5.59157	4.4625
MIA3	5.36674	5.92029	5.71543	5.97805	4.99541
TDRD3	4.67925	4.97699	5.21054	5.65152	3.87106
ABCB5	3.91144	3.57149	4.1988	3.70046	5.06995
SMARCA4	6.30555	5.9745	6.43402	6.47613	4.44957
ZNF836	4.36033	5.21248	5.10119	5.43996	4.46371
BC044596	5.63172	5.1918	5.31035	5.15702	5.28051
SETD5	6.31353	7.13132	6.68643	7.00675	6.43703
ZNF589	4.83242	4.79712	5.0209	4.91772	4.2389
LOC728613	4.62434	7.26953	6.57374	7.02488	3.48907
C3orf38	5.82848	5.63968	5.57121	5.60526	3.9077
MGAT4A	4.6621	4.11563	7.16306	7.43195	4.69239
SRCAP	5.0772	5.17863	5.11036	5.16344	5.43701
TRIM13	4.76501	5.7323	5.10144	4.94108	3.45563
PDLIM7	4.72902	3.96214	4.06236	3.90352	5.6632
ZNF93	4.17331	4.48219	4.12376	4.10185	4.72128
FMNL1	6.89754	6.10853	6.24988	6.40271	7.4009
GRIN2C	4.98613	4.96849	4.92409	4.67827	5.62737
LOC100134368	4.67774	4.7061	4.73501	4.39634	5.43216
BC033164	5.13325	5.20955	5.07241	5.04934	5.58192
CROCCP2	5.6997	6.01699	5.80925	5.94603	5.71631
RNF187	5.5012	5.46072	5.41695	5.40904	5.19835
KIAA1731	5.76273	6.3541	6.06977	6.07514	5.68381
RGS20	4.65749	4.64524	4.50865	4.56096	5.10007
LINC00894	4.4944	4.51093	4.87893	5.02722	4.11673
GPBP1L1	6.58994	6.49063	6.53488	6.517	5.73835
FNIP2	6.38744	3.18093	5.56443	5.51621	3.73975
CCP110	5.40453	5.49047	5.23816	5.22192	5.33948
HERPUD1	6.85761	6.83685	6.5223	6.47212	6.55208
TET2	7.46356	5.60637	5.54241	5.40224	7.70258
BC048103 /// CSGALNACT1	3.85531	4.30308	4.59319	3.84815	4.38049
LOC101929280	5.60355	5.44866	5.27503	5.16263	6.11138
CLDN4	4.34603	4.27815	4.12284	4.03785	4.98063
LOC100996342	4.82975	4.5413	4.5948	4.22159	5.02056
PGM2L1	4.17744	4.89357	5.20546	5.26561	4.24459
FRMD5	4.25643	4.15822	4.28241	4.03271	5.12039
TTC3 /// TTC3P1	5.41019	5.96549	6.37415	6.44269	4.20205
LOC101927151	5.3707	5.70719	5.30369	5.38725	5.89228
SNX22	4.72141	7.37199	4.54448	4.36992	5.02118
MDN1	4.66056	5.79764	6.16396	6.40783	3.99789
LOC101927137 /// SCLT1	4.57655	4.25328	4.09168	4.16565	6.12073
LOC100130872	4.72766	4.67113	5.23044	5.87599	5.11964
LOC102724250 /// NBPF1 /// NBPF10 /// NBPF11 /// NBPF12 /// NBPF14 /// NBPF15 /// NBPF26 /// NBPF8 /// NBPF9	5.42585	5.01641	4.67609	4.36167	4.15151
FLVCR2	5.28086	3.88633	4.1007	3.70747	4.37833
GDA	3.6925	3.5811	3.64921	3.47986	4.82844
ZNF248	4.41319	5.30785	5.09557	5.27981	4.52707
TBC1D1	5.91206	6.27872	5.45792	5.61399	6.68987
EREG	4.79026	3.84486	4.07772	3.81	4.36927
LINC01134	5.18044	5.1733	4.99693	4.99233	5.61682
F2R	3.91866	3.82554	4.16566	5.57984	4.20345
DACT2	4.34568	4.22073	4.26468	4.21271	4.83133
MLLT3	3.74211	4.0308	6.36286	6.29778	3.96108
LOC101928620 /// POU2AF1	4.51139	7.67831	4.86904	4.22466	4.52456
CDH22	5.49965	5.45492	5.18404	5.15471	6.19365
LOC101929378	3.80206	3.45793	3.53976	3.4599	5.0105
CSMD2-AS1	4.5051	4.26	4.24478	4.00386	5.20104
AK7	4.14334	4.08586	3.98939	3.85523	4.57711
ZFYVE20	5.40567	5.66408	5.99282	5.88568	5.03557
LOC221946	4.08051	3.99377	3.76926	3.61415	4.73291
OSER1-AS1	4.82432	5.03967	4.83291	4.94622	5.05874
RNF157	4.31296	4.1009	6.02502	6.13775	4.85107
STK4	6.62379	7.08156	7.42498	7.54833	7.40332
METTL20	3.77443	3.80101	3.85193	3.66151	4.44944
ATRNL1	4.07796	3.89597	3.71635	3.87475	5.61103
LOC101928778	4.21813	4.01029	3.93533	3.73909	5.06551
PTPRC	9.75253	9.0413	9.56459	9.6524	10.5312
LOC101929765	4.46824	4.56995	4.3828	4.24379	4.77538
CGNL1 /// LOC101930344 /// LOC101930349	4.51856	4.50441	4.50471	4.2665	5.24206
LSMEM1	4.12154	3.84749	3.9629	3.76431	5.33221
EME2	6.2299	6.23729	6.27547	6.23835	5.63065
MEGF11	5.08054	4.87529	4.82927	4.74777	5.39006
PHF20	6.14156	6.24382	6.2686	6.34928	6.0729
ZNF664	5.06948	4.82559	4.70651	4.50583	6.15436
SLC6A16	5.66088	6.97793	5.67961	5.76246	6.58436
GRK5	5.45953	6.02451	5.81448	5.63117	6.01606
LOC101928525	4.49237	4.26399	4.21879	4.2062	5.00694
BC015774 /// SEPT7P2	4.55627	5.24322	4.90378	5.07042	4.88331
CPXM2	4.49853	4.36263	4.35123	4.30554	4.96874
TBC1D10A	5.24623	5.46958	5.78359	6.16556	4.99065
MIPOL1	3.67478	3.38457	3.56525	3.20706	4.40441
RP11-440I14.2	4.33736	4.22478	4.24925	3.86691	5.32839
CCM2L	4.75933	4.52263	4.48776	4.45308	5.62898
DOCK5	5.98766	3.51863	4.51625	3.68223	7.49755
CCDC169	3.52818	3.06026	3.31215	2.79152	4.82201
LINC01111	4.03037	3.84911	3.84744	3.64203	4.72348
PPP6R2	5.75927	5.96073	6.13998	6.15504	5.08214
TMEM150B	5.02059	4.37594	4.38502	4.30529	4.96393
ZNF527	5.03868	5.22268	5.01089	4.95211	5.72003
SPATA21	5.15968	5.11633	4.95828	4.96381	5.51488
TBL1X	6.24707	5.7939	5.77688	5.61195	6.90249
HCCAT5	4.43018	4.35643	4.2167	4.01072	5.12884
MLX	6.69288	5.85258	6.1416	6.07884	6.45641
DPY19L1	4.61927	4.05024	4.30478	4.2476	4.47714
DDX3Y	6.19065	6.90987	6.91703	7.32131	6.26415
ZNF746	5.43946	5.01197	4.89587	4.91376	6.94122
LOC100506585	5.12845	4.15549	4.27381	3.97677	5.09468
LOC101929076	4.28505	4.21722	4.11424	4.0843	4.82148
STXBP2	6.54377	5.74614	5.89152	5.72194	6.57752
LINC00452	4.48779	4.35172	4.33415	4.14965	5.11918
ABCB4	3.21168	6.68679	3.13353	2.92057	3.31816
ARHGEF10L	6.37833	4.63091	4.94367	4.37087	4.60192
FHL5	3.28003	3.02513	3.06157	2.91755	5.37022
PMPCB	6.55317	6.72582	6.68265	6.69366	6.08979
GAS6	5.43404	4.92672	5.48579	4.85891	5.58266
MMP14	5.65205	5.54031	5.50485	5.28801	6.3399
TRADD	6.73125	7.03669	7.80772	7.34705	7.03508
DTX2P1-UPK3BP1-PMS2P11	6.63921	6.53785	6.48151	6.38493	7.12857
BAD	5.29281	5.04856	5.13725	5.03939	5.21299
PRPF8	7.99333	8.5032	8.50616	8.57405	6.59294
CAPNS1	9.2549	7.37952	8.03646	7.75495	6.44499
EIF3D	9.47994	9.87433	9.81718	9.82406	7.26061
GDI2	10.6975	10.6582	10.1334	9.81628	9.1764
RPL11	11.7797	12.269	12.352	12.3447	8.07024
ARF3	7.33292	6.00836	6.36795	6.22562	7.23138
RPS27A	12.8052	13.2788	13.417	13.3901	10.1995
EIF3F	10.2854	10.5985	10.7793	10.7611	5.63405
NARS	9.80901	8.70544	9.0554	8.96002	6.80263
STARD7	8.84754	8.94796	8.28502	8.45331	4.8732
SLC25A3	10.3925	9.99919	10.3144	10.3434	8.74567
RPS11 /// SNORD35B	13.4031	13.7817	13.4744	13.4893	11.6371
DDX5 /// MIR3064 /// MIR5047	11.37	11.6719	11.7979	11.7857	11.2958
CTDNEP1	7.58132	7.49818	7.20557	7.2777	6.98085
PSMB2	6.20663	5.75202	5.85214	6.17513	5.0731
KHDRBS1	9.40669	9.59047	9.59411	9.66505	8.45021
ATP6V1G2-DDX39B /// DDX39B /// SNORD84	6.82844	6.78781	7.11799	7.11737	4.99791
RTCB	7.54412	7.59112	7.27189	7.31846	4.58681
ERH	9.66106	9.43048	9.63312	9.59034	8.04612
ABCF1	7.00958	6.96214	7.15997	7.1877	5.70609
DAD1	8.7021	8.40244	9.06431	9.11641	8.28966
JTB	9.4714	9.47579	9.54945	9.59688	9.41879
SART1	6.87762	6.68143	6.8647	6.63313	6.14151
ILF2	7.72544	7.71663	7.94115	8.12068	4.52189
SPAG7	8.1396	7.78418	8.06466	8.13818	6.56011
TAF10	9.29197	9.00137	9.05024	9.06848	9.37544
ARF1 /// MIR3620	9.10031	8.10584	8.51197	8.30664	9.32003
SNX3	8.80653	9.54087	8.24261	8.11304	7.95344
CANX	8.42256	7.05892	7.62471	7.68668	5.90806
SART3	6.46803	7.16519	6.89696	7.13008	5.65744
CNPPD1	6.63681	7.02926	6.51558	6.39888	6.52783
SMNDC1	7.80953	7.38953	7.52221	7.49191	7.9641
GUK1	7.8689	7.26738	8.02127	8.37765	7.47723
KXD1	7.31536	7.01877	7.03781	7.15083	7.13043
OAZ1	12.2839	11.4491	11.2351	11.033	12.6689
ATP6V0B	9.6135	7.68346	7.95887	7.37815	10.8045
KARS	8.60155	8.32168	8.75129	8.68639	5.27281
RPS6	12.1891	12.8062	12.9885	12.9782	8.10084
USP22	8.23097	8.24017	8.08626	8.09014	6.97557
C11orf58	8.29119	8.47268	8.50354	8.48918	5.54876
COX4I1	9.28981	9.18095	9.23419	9.27545	7.52682
TMED2	7.15003	6.92971	7.18319	7.4368	6.38057
EEF2	11.3499	11.6796	11.5858	11.5291	7.15342
ATP6V0E1	10.1276	9.472	9.62743	9.65989	10.5766
HSP90B1 /// MIR3652	9.34769	8.83887	9.41522	9.30891	6.33006
APP	7.60612	6.0186	6.76484	5.48456	4.15278
PRKAR1A	8.57154	7.70901	7.6122	7.61213	9.30678
DSP	3.13949	7.69032	3.09615	3.11966	3.48809
RAD21	7.67759	8.28875	8.28476	8.43282	8.61544
WDR1	7.15675	6.46134	7.07813	7.10409	7.30425
AP2B1	6.67165	6.74916	7.05328	7.29297	5.03338
AP2M1	7.5705	6.84937	6.9249	6.97249	6.2658
CLTC	9.92455	8.73981	8.99927	8.87161	8.55258
MLEC	7.04724	6.51964	6.68588	6.65992	5.50244
LASP1	9.35743	8.33545	8.7374	8.9083	10.1202
TMEM59	6.67087	6.5138	6.86487	6.76326	7.13209
CSRP1	7.38044	6.33045	6.9485	6.77323	6.09005
CALM1 /// CALM2 /// CALM3	7.21664	7.32384	8.09839	8.27916	6.85395
WARS	9.19225	6.10413	7.17034	5.71812	7.29848
NDRG1	7.64834	6.71585	7.69101	7.411	7.6617
SOD1	8.86452	9.49164	10.2259	10.199	5.21235
MARCKSL1	7.56021	8.50089	7.78129	6.99026	7.82802
GABARAP	11.0212	9.20826	9.58421	8.90689	11.1804
NUCB1	5.77752	4.95818	5.16475	5.29342	5.4629
GNB2L1 /// SNORD95 /// SNORD96A	8.71561	9.13028	9.3831	9.38984	5.84425
SSR2	9.28106	9.2709	9.82688	9.97183	8.60259
CTSA	9.54391	6.4448	7.8525	7.67786	7.77323
CD63	10.0795	7.27926	8.29456	8.58251	10.1552
SPARC	5.05636	3.83712	4.79612	4.56875	4.05825
XBP1	8.21716	5.67403	8.45231	8.54582	3.81355
SPTBN1	4.21034	6.3427	6.08793	6.04037	4.88136
LAPTM4A	10.1005	8.81711	8.79522	8.31977	9.16487
CD81	7.64447	9.7893	8.32513	8.95118	3.03606
UBE2L3	5.87142	5.61553	5.80894	5.92449	5.0278
PTTG1IP	9.56038	7.69059	8.72743	8.18444	9.32624
GRN	10.3845	7.08454	7.80613	6.18214	8.7491
GLO1	7.52679	8.83392	7.90495	7.90442	4.96911
SRSF11	6.85775	7.43838	7.89198	7.97378	5.20034
SF3B3	6.76116	7.10622	6.99569	7.20159	4.40826
HSPA9	7.05925	7.12707	7.2984	7.74524	4.04854
DDX24	7.64104	8.48535	8.66954	8.6794	5.98227
PPP2R1A	6.48533	6.42522	6.21605	6.34262	5.34478
HK1	8.8341	7.37262	8.1224	7.98153	6.17549
KDELR2	7.24	6.30567	6.60014	6.56948	6.15928
NPC2	11.0155	9.15436	9.44414	7.98017	9.55122
LITAF	8.3483	8.20738	9.054	9.53846	11.8905
PRKCSH	6.52885	6.48977	6.2736	6.31855	6.43233
ACADVL	8.38116	7.26521	7.58169	7.45113	6.75272
OS9	7.89813	7.02801	6.96266	6.73921	7.83817
SKP1	6.72012	6.89657	7.26326	7.26655	6.20309
ACTR1A	6.68341	5.17894	5.62984	5.64243	6.29436
CAPRIN1	4.83419	4.71925	4.79959	4.93912	4.86137
RPL10 /// SNORA70	8.75718	8.87879	8.86421	8.90621	6.52177
PPP1CC	9.58149	10.1306	9.8545	9.70044	8.4907
ACTR2	8.94457	8.43306	8.46844	8.44396	8.384
PTP4A1	6.87499	6.28729	6.44594	6.51453	6.99043
PGK1	9.31071	8.00715	8.5935	8.51648	9.29192
SUMO3	7.85116	7.14752	7.43852	7.3963	4.94447
TPP1	8.01869	6.93104	6.76011	6.56374	5.87284
GNB1	9.03445	8.52899	8.55122	8.38776	8.78536
NUMA1	5.20708	6.09763	5.9884	6.21697	4.53689
HNRNPC	7.35803	7.32247	7.39348	7.44736	7.62839
CAPN1	6.37224	6.21884	6.16392	6.0094	5.71704
MIR636 /// SRSF2	8.77598	9.12391	9.20085	9.21126	7.40108
CALU	5.71214	5.08792	5.25164	5.28994	5.03972
ARL6IP5	10.7918	10.4738	10.9495	10.8316	9.51635
DPYSL2	9.97176	6.59929	7.94623	6.51359	5.11269
CTNNA1	7.94594	6.39432	5.80407	4.84827	6.35779
CTSD	7.53594	4.44233	5.60906	5.41538	6.33058
MAT2A	5.31804	4.8913	4.87826	4.84827	3.73399
LAMC1	4.27165	6.38629	4.06184	3.78692	4.41663
BZW1	7.03938	6.44329	6.68531	7.10787	6.69505
GNAS	9.12314	9.84368	9.47863	9.66483	8.47804
ANXA5	10.036	6.91214	8.35031	7.32941	6.50555
STMN1	3.99547	4.68026	5.44287	5.80382	4.12499
LRP1	7.07484	4.70093	5.16484	4.63919	5.35795
PEA15	7.3236	5.91399	5.58471	4.73747	3.68488
IQGAP1	9.52424	8.42288	8.18433	8.24601	9.81073
ACO2	6.68331	6.81468	6.22741	6.35922	4.48778
MCL1	8.38559	6.46924	7.60693	7.09437	10.0095
HSPA1A /// HSPA1B	7.82103	5.63705	6.38201	5.73406	8.27351
HSPA1A /// HSPA1B /// HSPA1L	8.55004	5.5844	6.75819	6.10594	9.14527
SARS	8.08479	7.94473	8.14164	8.11722	6.35577
TMBIM6	9.54749	8.75497	9.11472	8.98201	9.90767
LMAN2	7.45986	6.78187	7.19602	7.1518	7.45761
ZYX	7.55379	5.15496	6.30993	6.48333	7.84221
CIRBP	7.25191	8.13874	8.13156	7.96563	6.98424
CCT7	7.60407	8.0174	8.07609	8.10766	5.47081
PAFAH1B1	7.1243	7.17676	7.24592	7.32355	6.52144
PSME1	9.80136	9.74026	9.75029	9.92722	10.082
LAMP2	7.42901	5.09007	5.94523	5.62458	8.94583
HYOU1	6.86358	6.34391	6.86784	7.14508	5.2524
PLOD1	6.50961	4.49515	4.43236	4.6586	5.66678
PSMD2	7.94558	7.43513	7.61411	7.66448	6.42664
RPS21	9.27382	10.1394	10.2464	10.2625	6.61965
MAP4	5.8195	6.0633	5.94387	5.94365	5.15487
CTSB	9.34819	5.86378	7.45394	5.57927	5.30006
EPRS	6.59068	6.81532	6.95682	7.23498	4.26437
PRDX6	8.32229	7.67856	8.2376	8.57361	6.69935
PPP1CA	9.15501	9.07146	8.92558	8.97579	8.83065
SARAF	10.2428	10.2075	11.2633	11.2961	10.7159
AHCYL1	7.97971	7.62347	7.33325	7.2645	6.83144
GNB2	8.63365	7.46774	7.66871	7.44207	9.51005
NCOR1	6.74846	7.22457	6.74001	7.1312	6.10761
FLNA	8.15293	6.36183	7.50469	7.63562	5.59161
DHCR24	4.439	4.42414	4.5025	4.47872	5.16289
RAB11A	7.03362	6.09419	6.45975	6.41879	6.91689
PSAP	11.6442	7.71263	9.42163	7.34422	9.94316
RNF114	7.64256	7.19813	7.39792	7.35935	6.9427
S100A10	9.55486	6.36594	8.53492	8.28299	4.22806
CCT8	9.69985	9.29931	9.60624	9.68588	4.45858
MIR1292 /// NOP56 /// SNORD110 /// SNORD57 /// SNORD86	5.9924	6.62755	6.59929	6.85851	4.92888
PSMB1	9.74312	9.28991	9.59817	9.63678	9.09422
EPAS1	3.95644	3.22135	3.88593	3.8002	4.25919
DNAJA1	9.03135	8.32875	8.46394	8.42993	9.1812
PSMD4	8.89812	8.47088	8.58131	8.422	8.91722
UQCRC2	8.51758	8.10975	8.3557	8.47924	6.45476
CKB	4.76691	4.40817	4.84185	4.30665	4.99787
RHOC	6.76675	5.47346	6.20803	5.94016	4.96475
STAT1	7.55907	6.3728	7.26218	7.39492	7.65547
SSR1	8.00266	7.33243	7.62183	7.55976	6.3214
TRA2B	8.16291	8.6715	8.70817	8.68108	6.38178
PALLD	5.89	3.62037	4.44629	4.91473	4.0112
MGEA5	6.76215	8.05494	7.71046	7.63824	7.34245
SEP15	9.00204	9.53232	8.8067	8.90472	8.50666
HLA-E	10.6449	10.7992	10.9229	11.0345	11.8523
PPM1G	6.52047	6.49843	6.62496	6.80497	5.27431
KTN1	8.58456	8.9633	9.03087	9.02368	5.25323
SRPR	6.13769	5.87575	5.9885	6.26136	5.62167
PHC2	8.03765	6.67208	7.06945	6.76109	10.4273
LGALS3BP	4.9617	4.36085	6.01549	5.74245	4.61845
SLC3A2	6.55784	5.43922	6.13331	6.03155	5.01707
RPS23	9.47427	10.0628	10.1922	10.2563	6.03214
VCL	9.25944	7.79367	8.4329	8.09928	8.22615
DCTN2	7.53286	7.07159	7.13428	7.21197	6.36758
DEK	8.90615	8.58699	8.82718	8.91356	7.88333
RPL8	11.8814	12.4333	12.2403	12.2609	7.83942
RERE	7.88714	8.42583	8.16685	7.46296	8.72864
HSBP1	8.32435	6.65703	7.00195	6.43224	7.827
SEC31A	8.59479	8.46229	8.51178	8.50031	4.5023
MLF2	6.20383	5.86922	5.55499	5.8266	7.35403
CCND2	5.57674	6.46671	8.4121	8.57143	5.45605
IMMT	7.69982	7.30432	7.74238	7.71678	4.06367
SSRP1	6.79424	7.29614	7.26313	7.43899	4.88829
RPL31	9.2573	9.33175	9.81883	9.86657	6.4489
UBA1	7.47296	7.12237	6.92418	6.84884	6.92649
ABLIM1	4.81318	8.37616	9.06597	9.25331	4.93174
ALDOA	9.82349	7.87563	8.73738	8.48733	9.17338
PPIB	9.80322	9.04289	9.70179	9.72313	7.78771
LOC101928061 /// SERP1	8.77236	7.32125	7.95844	7.93489	7.26636
SERP1	8.67178	7.39586	7.95097	7.87613	7.44811
TSPAN3	6.16821	8.73212	5.88835	5.94558	3.73169
ACTA2	5.41356	4.19772	4.84615	5.22586	4.83094
PPT1	10.8969	7.76366	9.16636	8.54249	10.1696
TAX1BP1	7.19724	6.52906	6.92823	7.10345	7.36327
MDH1	8.64817	8.58529	8.82192	8.87514	5.81041
ANXA6	7.65114	8.60977	8.36874	8.47454	4.25706
CD59	4.67977	5.18664	6.32105	6.19067	7.11652
SERPING1	4.77681	3.8219	3.79305	3.58201	5.47567
PSME3	5.61212	5.18165	5.1947	5.45828	5.83793
HIF1A	10.3995	9.87909	9.53824	9.23298	11.3861
TRIM28	6.29293	6.75739	6.69761	6.82406	5.08759
SNX17	8.31077	7.804	7.72444	7.55864	6.04429
IPO7	6.75414	6.78514	6.95535	7.13573	4.17513
ACTR3	9.25069	9.22261	9.11235	9.22668	9.66808
RBM14-RBM4 /// RBM4	6.72295	6.84866	7.13249	7.26235	6.78576
CKAP4	8.89141	6.64255	6.63827	6.35037	8.9178
AARS	6.85337	7.41173	7.34462	7.24352	6.26387
TMEM189 /// TMEM189-UBE2V1 /// UBE2V1 /// UBE2V2	8.76012	6.90594	7.20524	6.78084	7.44436
SSR4	9.74761	9.546	10.0096	10.1076	5.61414
CD9	5.54472	5.12068	4.51263	4.50967	4.26945
RPN1	8.41171	7.25173	7.66283	7.68763	7.86271
ANXA1	9.11927	2.95778	8.00724	7.84962	5.28555
PAICS	5.57669	6.7422	6.84932	7.14607	3.10833
JUP	5.68253	6.35579	4.70975	4.24007	4.83675
EIF1AX	7.38683	7.77089	8.04897	8.08426	5.09072
YWHAH	7.1766	5.75552	6.22437	6.18663	5.71524
DSTN	7.90639	6.6863	8.7795	8.84279	5.6456
TAF7	7.46014	9.20682	8.73277	9.00331	9.53936
EIF5B	6.12716	6.34081	6.64399	6.96852	3.59515
CD99	8.99951	7.69656	8.71034	9.07933	4.84353
ADD3	9.12218	10.5213	10.6664	10.5225	8.89224
HADH	5.51237	6.33279	6.06368	6.30726	6.05251
PFKP	5.99533	7.22185	7.38219	7.56839	4.93067
RAD23A	7.62767	7.76682	7.66494	7.75144	4.6821
DUSP1	7.23779	6.1973	6.78373	5.93565	8.97387
ANP32A	6.82256	6.60437	6.40597	6.33401	7.23639
PLD3	6.41096	4.56182	5.10226	4.93961	4.42272
PSMF1	6.2276	5.87353	5.99841	6.08409	5.21383
HNRNPA0	7.27904	7.81956	7.78427	8.02386	5.81675
GOLGB1	6.37023	6.28861	6.43059	6.34872	6.20859
STOM	7.17893	4.68285	7.19982	8.38987	5.64344
CYC1	7.87181	7.34051	7.27961	7.30532	4.97872
PSMC2	7.11662	6.70327	7.34523	7.33174	4.38649
SF3B1	9.45357	9.87083	9.92126	9.98715	9.49357
SMARCC1	6.51895	7.37368	7.09211	7.27724	6.06801
NHP2L1	6.01805	6.42216	6.45637	6.58591	5.6838
TM9SF2	8.66313	7.52041	7.54011	7.33892	8.48553
SYNGR2	8.09946	8.36274	7.22319	6.67624	6.70229
DCTN1 /// SLC4A5	5.07369	4.89854	4.69469	4.94526	4.41786
BCLAF1	7.43329	7.66065	7.81288	7.91095	7.3515
SON	8.77692	8.9882	9.14728	9.10106	8.11173
PXN	8.40387	4.28824	8.05976	8.32718	9.6907
ATP6V1B2	9.36557	5.82219	6.96255	6.06594	9.42121
RBBP7	7.82611	9.0343	8.62717	8.99524	5.31601
RPS29	11.593	12.1164	12.2292	12.3134	9.22403
DAP	7.02617	6.30338	6.29033	6.21375	6.40942
COPB2	7.98851	7.17761	7.21826	7.3362	6.94512
USP9X	6.28017	6.77949	6.78359	6.93568	6.43417
PFKL	6.43957	6.45857	6.21661	5.9494	5.67296
LGALS1	11.0603	6.82503	9.28147	8.54657	4.69814
GPX4	9.15295	8.30348	8.86368	8.67119	7.51766
THBS1	5.3273	3.47368	3.98784	3.40451	4.09314
CSE1L	6.20123	6.11806	6.3723	6.54414	5.18688
PSMA7	8.728	8.21866	8.44862	8.51649	7.74296
POLD2	5.58597	6.45776	6.18131	6.35184	5.30713
COX8A	9.63118	8.29852	9.05988	8.93456	8.64939
PGRMC1	6.66958	5.2263	6.17229	5.9613	4.93632
EIF5A	8.12	8.07283	8.14177	8.21734	5.81404
ITGB5	4.9668	4.85373	4.85562	4.73886	5.56686
MGAT1	8.34816	6.89236	7.19786	7.0695	7.37847
ACLY	7.07236	7.09536	6.85653	7.1292	6.19218
SRSF7	8.62463	9.46805	9.21927	9.31005	5.36145
CDH1	2.70006	2.81781	3.10613	2.99566	3.14997
PJA2	8.26777	8.20824	7.9567	8.28788	9.01943
ECHS1	7.75118	7.45246	7.28619	7.25846	4.85054
PLP2	9.56283	8.73538	8.97058	8.46933	8.56071
SSB	8.4573	8.47529	8.64855	8.85629	4.96277
EIF2S1	6.89145	6.73201	6.97634	7.12245	4.58122
TIMP3	4.87581	4.7646	4.62073	4.43777	5.52448
RPL4 /// SNORD16 /// SNORD18A /// SNORD18B /// SNORD18C	11.9836	12.3396	12.6217	12.6188	5.17169
NMT1	6.81214	6.80069	6.73205	6.84777	4.60534
IGFBP7	7.49264	3.71562	5.31441	4.5093	4.4207
PUM1	8.77046	8.86125	9.01401	9.03567	7.29141
ARHGDIA	6.339	6.14486	6.21747	6.39486	6.2977
BHLHE40	5.82411	4.87066	5.72354	5.75849	5.98573
NUDC	7.44939	7.5644	7.4984	7.67648	6.50729
ARCN1	7.24684	7.22313	7.42529	7.61043	5.98698
UBA2	7.0817	7.54878	7.49518	7.67464	4.65187
GNAI3	7.42971	6.61648	6.82867	6.84061	8.09038
CHD4	7.22149	7.75173	7.42419	7.74018	6.95901
HTRA1	4.50194	3.98888	4.00985	3.94605	4.81001
LRPAP1	8.3756	7.16433	7.44779	7.29495	7.90993
ITPR3	4.73902	7.09823	7.0316	7.04826	4.85682
PITPNA	6.8792	6.52974	6.23476	6.28474	6.96961
SLC7A5	4.43406	4.52513	5.38133	5.45671	4.93242
AMD1	6.42975	6.13356	6.27199	6.45121	8.0259
PSMD1	7.71582	7.07553	7.42953	7.50742	6.21182
CSTB	10.1389	8.77607	9.61881	9.29674	9.41971
RRBP1	5.22568	4.32461	4.68935	4.49348	4.56639
TNFAIP1	5.04349	5.02701	4.9668	4.98429	5.02798
DDX3X	6.3119	5.85718	6.12638	6.14582	6.89621
PPP1R7	7.57339	7.09304	7.54182	7.56904	6.19578
PLS3	2.93541	2.4397	3.18409	2.69655	3.60141
ERP29	9.15216	8.96168	9.09752	8.84078	6.46975
CTBP2	7.14714	3.44515	4.83438	4.17059	6.70849
SNRNP70	6.32395	7.15938	6.9858	6.93344	5.99978
RAD23B	6.87166	6.9028	6.58741	6.85099	6.65125
ARIH2	5.63964	5.79245	5.94968	6.20672	4.64643
ENO1	9.23358	7.96104	8.73033	8.75624	6.70302
PSMD13	7.23835	6.72139	7.02553	6.95307	6.74695
ILK	7.52399	6.53134	6.65397	6.68016	6.82362
BTG2	7.97643	9.06227	8.19175	7.74883	10.3307
CAPZA2	8.81262	7.22928	7.44648	7.15534	8.58543
DDX1	7.37198	7.596	7.61261	7.84587	5.94498
ATP1B1	4.91422	3.64305	4.68824	4.40915	3.68465
LOC101927673 /// OTUB1	6.51762	6.33465	6.34242	6.2948	6.39877
SREBF2	5.79293	6.24722	5.57842	5.55676	5.60021
SLC2A1	4.20821	5.45358	4.68092	4.92149	4.85267
PSMC4	7.42831	7.16164	7.23893	7.18468	6.11872
BAG6	8.05496	7.93488	7.85979	7.77333	7.37653
SYPL1	7.31036	8.90044	7.27765	7.27682	5.55043
TARS	7.19853	7.00059	7.16262	7.54665	4.41743
COPE	5.96568	5.48507	5.5576	5.68481	5.68581
PSMC3	7.04789	6.37386	6.86459	6.7046	4.38792
NME1-NME2 /// NME2	9.3626	9.48156	9.2662	9.48931	3.30541
NUDCD3	5.44877	5.75662	5.65384	5.7066	5.57582
RALY	7.43437	7.1848	7.32157	7.27912	7.37442
AKR1B1	8.34171	8.91141	8.84485	9.16004	5.79374
SRP9	9.81809	9.78074	10.006	10.1798	8.33336
PSMA5	8.23383	7.44159	8.09892	8.25628	6.62354
FDPS	6.85634	6.7456	6.91973	7.08601	5.60876
RAB5B	6.60215	6.57967	6.52884	6.64981	7.04145
DAB2 /// LOC101926921	4.64569	3.36843	4.36143	3.64353	3.99686
ADRM1	7.43141	7.15448	7.11167	7.0644	6.80398
APEH	6.63157	6.34798	6.63946	6.80239	4.68449
SEC11A	10.2909	8.8418	9.33251	9.07738	8.07041
WSB1	8.79488	7.83629	8.01732	7.59798	7.95565
MOB1A	8.329	8.01445	7.4534	7.53718	7.71763
PRNP	7.5839	6.49002	7.03079	7.11167	3.88178
ANXA4	7.76314	7.54354	6.1695	6.09448	4.78481
EIF4A3	8.08394	7.43607	7.67441	7.5894	7.62014
ANP32B	10.0682	10.0744	10.6747	10.6429	7.00475
SEPT11	4.55724	4.38321	4.87662	5.61413	4.34347
SH3BGRL	10.1926	9.27738	9.12795	8.76681	8.39408
ENO2	3.21873	4.95757	6.36968	6.50372	3.40751
STK25	6.27689	6.34006	6.44391	6.37492	4.26616
PSMA2	7.90766	7.4772	7.59231	7.7907	6.43106
MYL12A /// MYL12B	11.1148	10.7179	11.379	11.4821	11.462
ATP5B	9.78693	9.02939	9.33742	9.3322	7.62504
EBNA1BP2 /// MIR6733	6.2641	6.75143	6.65691	6.96457	3.96054
EMP1	4.42636	2.8744	3.55771	3.02813	3.24515
CCT6A	7.20909	6.6934	7.00808	7.08989	3.22528
ETS2	7.13541	3.8772	5.63865	5.02718	6.82311
RARS	5.89754	5.38577	5.77876	5.8586	4.93643
STAT6	8.1177	8.01219	7.46715	7.23917	8.87022
ARHGEF12	4.09767	4.52071	4.17157	4.35347	4.60353
VAMP3	7.80222	5.59154	6.32406	5.89669	7.53434
GTF3A	8.29902	9.52613	9.54922	9.77884	6.0844
SCP2	8.78351	8.10976	8.36395	8.51616	4.1499
ENC1	5.53148	4.40222	4.4355	5.05307	4.75075
UBE2D2	6.34284	7.30939	6.90163	7.31389	6.07073
ADIPOR2	7.4321	6.91454	6.8452	7.17339	6.49667
GRHPR	7.43526	7.36674	6.99449	6.95479	5.86106
SLC9A3R1	7.03975	6.17481	7.65015	8.16978	8.09557
FLOT2	6.12005	6.61671	6.12903	6.17553	7.29596
YME1L1	7.75544	7.78699	8.14447	8.28012	6.69726
BAZ2A	5.99649	6.40082	6.07246	6.06808	6.41145
SF3A1	7.00122	7.38386	7.24951	7.46739	7.27479
COPB1	8.43956	8.32362	8.2523	8.398	7.2903
CST3	8.56926	4.49883	6.7906	4.76068	6.01526
TMEM109	7.02486	7.62781	7.24946	7.63381	5.45511
IVNS1ABP	7.69058	6.61732	7.55743	7.39759	8.28672
OAZ2	7.82036	6.26042	6.51671	6.14096	9.20051
ANXA7	8.26078	7.64268	7.99392	8.02213	7.85385
ZFP36L2	8.10911	8.13027	8.58069	8.73112	6.57213
CUL3	6.88089	7.52919	6.92345	7.28061	7.0402
PPP2CB	8.59806	7.67767	8.00755	8.05424	6.51941
HNRNPF	7.23564	7.29131	7.35392	7.45493	6.59281
UBAP2L	5.68545	5.76264	5.67077	5.81734	5.25714
TPD52L2	8.28182	6.64439	7.02361	6.61463	8.58054
NBR1	7.29234	6.28525	6.95306	7.06443	7.15974
DHX15	8.53507	8.90502	8.73463	8.84888	6.61775
PSMD3	6.43898	6.34301	6.19919	6.39808	4.47582
ITGA5	7.04119	5.30974	6.24746	6.21873	7.36734
CSNK2B	8.83993	8.59161	8.50503	8.49822	7.98227
TRAP1	6.22071	6.81089	7.04251	7.15653	4.88163
IGF2R	8.41503	6.56202	7.66664	7.68244	10.8287
RBM5	7.18942	7.86904	7.42493	7.586	6.58625
PHGDH	4.59406	4.63358	4.84335	5.41514	5.18208
TRAM1	7.58667	7.42455	7.73082	7.85936	5.79491
ADRBK1	6.54724	6.15743	6.14052	5.96016	6.75383
MGST3	5.94448	5.69839	5.73096	5.61352	5.31461
COPS6	7.03437	6.75943	7.00107	7.04043	5.69629
PPP1CB	7.36628	6.63861	6.91178	6.88487	6.84732
LRP10	6.56399	7.28137	7.24885	7.11669	9.3781
GSS	6.47707	5.45262	6.4303	6.37873	5.21945
SOX4	6.98278	5.10392	5.57037	5.36728	4.08346
WDR77	6.13661	6.45945	6.06493	6.1784	5.33539
IFI30 /// PIK3R2	11.967	8.28147	9.36684	5.61457	9.862
CUL4A	6.01703	5.91307	6.24244	6.29039	4.56822
ALDH2	10.1973	5.71229	7.40357	5.12223	5.52518
SEPP1	3.43719	3.33517	3.503	3.69966	4.46636
CAT	7.35543	6.89385	6.41793	6.0879	7.43522
TTC1	6.7576	6.85602	6.76075	6.93752	6.60366
COL6A3	3.4813	3.31696	4.16154	4.90556	4.94963
GBF1	5.35951	5.48464	5.21115	5.66706	5.02441
ATP6AP2	10.0231	8.03539	8.86246	8.62693	8.8475
NPEPPS	6.66195	6.65703	6.42248	6.56471	6.95725
BUB3	6.46111	7.84677	8.12768	8.4701	5.05945
MAPKAPK2	4.54353	4.66808	4.62783	4.58753	5.25366
SCRN1	6.7736	7.69725	5.98741	6.02632	3.51675
TALDO1	10.984	8.16129	9.09636	8.30359	12.3188
JUN	5.99252	7.38904	6.81067	5.98277	5.71186
SQSTM1	7.69573	7.02752	7.05472	7.07117	7.71865
JUNB	8.75193	7.5985	8.26326	8.04872	10.0774
MARS /// MIR6758	6.76291	6.89561	6.79043	6.94875	6.80805
RRM1	5.54865	5.94302	6.70331	6.78721	4.2768
DKC1 /// MIR664B /// SNORA56	6.85313	7.64861	7.48766	7.70481	5.58817
SUPT5H	6.96483	7.33045	7.28423	7.24752	6.91841
PYGB	6.43022	5.94471	6.17188	6.15006	6.09441
QSOX1	7.271	5.87658	6.26182	6.06469	6.95775
RCN2	5.82664	7.70619	7.12617	7.67169	4.52898
CTSC	7.5259	5.16115	6.97973	7.12121	7.32118
PPIF	6.3123	4.55447	4.99884	4.69448	7.67666
AHSA1	7.40023	7.78386	7.65914	7.88671	6.33833
PUM2	8.3025	8.83836	8.70674	8.92677	8.42053
PRCP	8.75197	7.88646	7.18172	6.73152	8.32341
MYH11	5.31744	5.22441	5.11899	5.00077	5.75185
USP7	7.10436	7.7229	7.56016	7.55024	6.67636
PPP1R11	8.16985	7.7689	7.96906	7.91257	8.51385
GRSF1	6.31018	5.9842	6.31276	6.57854	3.70867
NFKBIA	10.3852	9.42942	9.554	8.80419	10.384
TSN	6.36901	6.21993	6.29335	6.53938	4.4455
TGFBI	10.9764	4.18008	8.42463	4.20125	4.20191
PFDN1	7.02076	6.9579	6.91744	6.96753	4.22012
IGFBP4	4.04864	4.54449	4.00719	3.96207	4.98225
IDH3B	7.66118	7.35035	7.49713	7.38521	6.00211
ELF3	4.40119	4.37967	4.28131	4.13214	5.01563
AAMP	7.34289	6.68454	6.92543	6.75968	6.37311
TOMM70A	5.79799	6.37928	6.37912	6.73036	3.5206
SRM	6.66139	6.9603	6.87611	7.13468	4.62001
NCBP2	6.42024	6.64051	6.68783	6.75457	4.2627
ARF5	8.2049	7.00292	7.43749	7.24582	8.3272
RPA1	6.91347	7.47639	7.95659	8.22222	4.7372
ZFP36	9.53397	8.98577	8.8219	8.51515	10.9282
PSMA3	8.29378	7.77232	8.07754	8.23913	6.9963
UBL3	7.17141	7.08894	7.18101	7.31778	6.98235
DUSP3	6.67858	4.71454	5.25788	4.68503	5.20427
FHL1	3.67608	4.75742	5.82825	5.42961	3.75183
BCL2L2 /// BCL2L2-PABPN1 /// PABPN1	10.0536	10.0508	10.0131	9.89775	8.52245
TRIP12	7.24602	7.12067	7.17087	7.23474	6.68285
KDM5B	5.26656	5.43448	5.38986	5.62626	5.94368
LAMP1	7.49099	6.63155	7.02387	7.05705	7.03539
MCM3	5.95556	7.30336	6.97665	7.36581	4.98043
VAMP2	4.88945	5.3302	5.44384	5.67628	5.51606
RAE1	7.04991	6.86162	6.86472	6.90461	6.41927
CLSTN1	6.86213	7.28319	7.47991	7.48623	5.01659
SORD	6.06693	5.21247	4.3974	4.37304	4.14659
ID2	10.1594	3.11882	10.1628	10.8994	8.49548
UQCRQ	9.24912	8.23095	8.8073	8.99737	7.60121
SAMM50	5.77926	5.70403	5.63685	5.70726	4.28075
DCTD	6.39597	6.75731	6.69195	6.90431	3.89652
SNW1	7.87558	7.85938	7.88691	7.98304	7.21123
GLB1 /// TMPPE	8.24104	6.7485	6.6169	6.18436	6.68837
NME1	6.99831	6.98424	7.16455	7.32153	5.60778
TMX4	6.98714	6.65978	6.7977	7.00749	7.79798
SEC23B	6.4256	5.7422	5.81311	5.92025	5.71609
DDX39A	7.60686	8.35729	8.07285	8.22227	4.53124
SFPQ	7.85165	8.03679	8.21224	8.19977	5.59291
TXNL1	6.81629	6.79969	6.7884	6.86381	6.24293
SMC1A	6.31861	6.1495	6.20398	6.31654	4.82745
NISCH	8.21817	8.15489	8.42082	8.34424	6.86021
EIF3H	10.7529	10.8005	11.0253	11.0377	7.76516
ZC3H15	8.61289	8.46055	8.62081	8.74776	6.77311
PPP4R1	7.88513	6.89166	6.93498	6.8986	10.1828
COX7A2	9.91694	9.63349	10.0674	10.1422	9.40315
INPPL1	7.38797	6.23518	6.2776	6.11149	5.88248
OAT	8.2436	7.41521	7.84747	8.13034	7.91752
PHB2	9.30258	9.78131	9.59109	9.68905	6.92946
PPP1R12A	7.37518	7.32035	7.38784	7.66889	7.72094
CNN2	8.47853	8.79728	8.86015	8.86503	9.93266
PWP1	7.00658	8.30076	7.63154	7.9447	4.54048
ICMT	5.96954	5.63789	5.81938	6.07727	5.29371
ALDH9A1	7.98541	8.31334	8.058	8.25825	7.89655
AP1G2	6.28962	7.40505	7.09912	7.06244	5.58356
RUVBL1	5.44408	6.23251	6.30552	6.63271	4.73232
GPAA1	6.52817	6.30284	6.27675	6.26544	5.95714
PRDX3	9.28466	7.39633	7.93781	7.57021	8.03232
MBTPS1	6.65447	6.74564	6.89196	6.90978	5.09259
NBL1	4.8663	4.93488	5.1412	5.324	5.42247
SND1	7.52641	6.85494	6.84605	6.83705	5.24518
DARS	7.53195	8.50812	8.33995	8.46855	4.54738
INSIG1	5.75462	5.92163	5.6425	5.79446	5.66633
RRAGA	7.79396	7.93485	7.69646	7.65928	7.42178
IER3	8.22149	4.19502	5.80769	5.26301	8.43701
EIF2B1	8.21729	8.09828	8.11405	8.04802	4.09117
CYB5B	4.71136	5.14323	5.21675	5.5136	4.51079
FXR1	7.41671	7.87798	7.98325	8.12233	6.86533
CLPTM1	5.84479	5.70972	5.45282	5.55965	5.53031
BST2	7.79385	6.56579	6.93806	6.87233	4.9973
IFNGR2	9.80873	9.19771	8.03894	6.61228	10.2872
KDM3B	8.02671	8.074	7.74856	7.68584	8.01873
TSTA3	6.32196	6.47769	6.63916	6.65074	6.19378
SCARB2	6.47613	5.06722	5.57098	5.18503	5.0787
CNIH1	8.57652	7.61914	8.19117	8.1832	5.30416
HSPG2	4.92924	5.12063	5.10246	4.99797	5.39286
ITGA6	4.6416	4.26077	8.83495	8.76247	5.58941
ARL1	5.39327	5.71835	5.58299	5.83557	3.5243
ACSL3	5.76513	5.75842	5.57261	5.95677	4.91091
SMC4	5.67721	6.46845	6.67656	6.72491	5.36242
TIMP1	9.72772	4.73378	8.29426	7.27735	8.66542
MARCKS	5.86869	5.80073	4.24238	3.80155	6.90996
USP14	6.92719	7.30764	7.58809	7.7433	4.38226
GYS1	5.91758	5.66177	5.71815	5.97106	5.13381
AKAP1	5.28329	5.93404	6.01388	6.03207	4.51443
PSMA1	9.20917	8.51448	8.83201	8.8695	6.89017
HMCES	4.90465	6.16091	6.12732	6.41255	5.02687
SRRT	7.87014	8.52473	8.61763	8.80899	7.08852
TOX4	6.11518	6.1364	6.29574	6.40245	6.36231
API5	4.34107	4.80584	4.79164	4.92398	3.6673
TPD52	3.37895	8.26418	5.48129	5.85804	3.12906
SIGMAR1	4.99386	4.79798	5.36885	5.44848	4.40594
EGR1	6.60812	5.10695	5.25863	4.22532	5.28118
PNP	6.80408	6.80527	6.68479	6.90154	3.47026
SRSF4	6.81096	6.96364	7.06885	7.12415	5.97409
DNMT1	7.17055	6.99589	8.45486	8.60089	2.83736
GATC /// SRSF9	9.48128	9.29069	9.22636	9.29132	8.66908
PGRMC2	5.3925	5.87166	6.03667	6.44516	4.55105
PPP1R10	5.92003	6.01973	5.6454	5.96648	6.22623
ENTPD6	7.0032	6.18512	6.95918	6.6803	5.28072
PSMD7	7.67837	7.08827	7.41885	7.69008	6.10844
PEX19	5.35437	5.45083	5.37166	5.64385	4.69703
NIPSNAP1	5.97281	6.74786	6.77455	7.11861	6.03249
MYBL2	4.95	5.58743	5.04764	4.94944	5.73731
RANBP2	5.92564	6.36621	6.38021	6.74967	4.78524
TUBG1	4.72133	4.47135	4.69282	4.93821	3.22158
ACIN1	6.72701	7.23959	7.02651	7.2508	6.68943
SNX1	7.52471	7.18945	6.93914	6.84208	5.87365
MRPL49	6.78362	7.71371	7.36667	7.66975	6.72442
EPB41L2	4.59996	5.87887	4.2604	4.00201	3.84625
LAPTM5	11.1331	11.0216	10.4515	10.0813	11.6487
CDC123	7.1442	7.59773	7.22759	7.35342	8.4794
ELAVL1	6.27866	6.48479	6.28054	6.52187	4.91318
KIAA0100	7.07022	6.48567	6.54412	6.36134	5.46038
CLCN3	5.81124	5.69204	5.67218	6.14875	4.9488
MARCH6	6.75246	7.30016	7.4511	7.47766	6.27976
EIF1B	9.01919	9.29987	8.71811	8.7706	9.16305
NDUFS3	8.00091	7.60266	7.6777	7.75416	5.30006
SRSF1	6.25367	6.50081	6.78894	6.82231	5.45776
CD14	11.583	3.23676	7.16684	2.99497	10.3181
TP53	6.09141	6.47434	5.96079	5.8756	4.87909
SAFB	5.24287	5.3909	5.3969	5.40397	4.96458
ECE1	6.01566	5.66363	5.77252	5.50264	6.91106
JOSD1	6.99337	7.13052	7.51481	7.817	6.69983
COX6C	9.99013	9.97811	10.6718	10.7715	3.97949
MCM5	6.40969	7.2784	6.02916	6.07511	5.38169
TSG101	8.0735	7.41803	7.32763	7.28378	8.41365
TBCD	5.5673	5.33183	5.91538	5.87634	5.0671
WSB2	7.36217	5.12757	6.33292	6.55357	5.93194
MIR7703 /// PSME2	10.1276	8.9714	9.53273	9.46005	8.00713
DAXX	6.37536	7.34826	6.7851	7.23922	6.26169
[truncated: 9,711 more rows]
